# Supplementary material for: Transmembrane Protein TMEM230, a Target of Glioblastoma Therapy
Source: Front Cell Neurosci. 2021 Nov 17;15:703431. doi: 10.3389/fncel.2021.703431 (PMC8636015; doi:10.3389/fncel.2021.703431)
Supplement: Supplementary Table 2 — All enriched pathways identified different between high or low TMEM230 from differentially expressed genes (DEG) in patient samples of oligodendrogliomas A). [file Table_2.XLSX]

## Sheet: all_genes
gene_name	baseMean	log2FoldChange	lfcSE	stat	pvalue	padj
A1BG	73.9527312819231	-0.497798715777347	0.145435333436501	-3.42281826578747	0.000619754976002329	0.00197236485698289
A1CF	0.0214402199520154	-0.00291414065928587	2.90048782817136	-0.00100470708098889	0.999198359866817	0.999870641425771
A2BP1	699.763571503169	-0.848953263488018	0.284712176055262	-2.9817947207261	0.00286564075495449	0.00753726264121038
A2LD1	31.0925594236055	-1.20386501081985	0.133824336578757	-8.99586010733822	2.34389639680742e-19	4.04740681377281e-17
A2M	9799.67461702537	-0.358474087330796	0.101116286748548	-3.54516664780459	0.000392364934826322	0.00131559255193153
A2ML1	141.063014925988	-0.277873294412569	0.182590309416377	-1.52184031726957	0.128049096600443	0.201568413499314
A4GALT	94.0707597879024	-0.560609693139189	0.11947205907628	-4.69239165603779	2.70029546065667e-06	1.64328867870044e-05
A4GNT	0.460773859215155	0.11260482046253	0.456112934669656	0.246879252709826	0.805001673361161	0.903687738727935
AAA1	0.0647549853532891	0.0315469764316334	2.51996166225527	0.0125188318950059	0.990011678209253	0.999052814291159
AAAS	807.964333524686	0.166641343219916	0.0575248029749535	2.8968607383579	0.00376917028955876	0.00955633893550949
AACS	564.524650921396	-0.335874042051281	0.108791741719824	-3.08731192957891	0.00201975532232729	0.00553836210602718
AACSL	1.33890956498347	-1.00345737304635	0.361432948034881	-2.77633065414255	0.00549762662201841	0.0132496913743707
AADAC	0.0336011435336034	-0.205245521890434	2.90048782817136	-0.0707624144797162	0.943586845704815	0.999052814291159
AADACL2	0	NA	NA	NA	NA	NA
AADACL3	0.00999698600653304	0.0542215804333412	2.90048782817136	0.0186939520678925	0.985085252963837	0.999052814291159
AADACL4	0.016136216940731	-0.032660179909075	2.90048782817136	-0.0112602368442504	0.991015820726465	0.999052814291159
AADAT	284.839306582205	0.225311961668978	0.0602576176175844	3.73914486793828	0.000184647300534041	0.000683329275225481
AAGAB	649.944598354849	-0.428840408989749	0.0621114893016274	-6.90436526014057	5.04283949494273e-12	1.2986486795232e-10
AAK1	1440.27819097831	-0.253441196694602	0.112539265341915	-2.2520246238022	0.0243207159785578	0.0482423227718264
AAMP	2823.58314070621	0.113899037054187	0.0411953276172532	2.76485328900467	0.00569484023677533	0.0136664859386071
AANAT	2.7741515257803	0.213302904565987	0.208122919684041	1.02488906502854	0.305415534800116	0.418679929333304
AARS	6814.5184348876	0.13738011978538	0.0461788220389444	2.97495938007085	0.00293027346500388	0.00767698304161135
AARS2	510.770089095279	0.00702273627888323	0.0478214566975299	0.146853248810507	0.883247853783267	0.963833069580116
AARSD1	721.392394008975	0.0989328338496785	0.0649158795281705	1.52401591981429	0.127504734409421	0.200809573573143
AASDH	315.689185584217	0.118150618330337	0.0672542305605162	1.75677600272334	0.0789559969523477	0.133655053046688
AASDHPPT	1804.32615695731	-0.0220156950362531	0.0588639347948409	-0.374009911382659	0.708396942237777	0.822747829862996
AASS	1013.82292672103	-0.210273165983371	0.0921622409753988	-2.28155439535699	0.0225156617848023	0.0451106287079744
AATF	1325.95513319894	0.0676365117532307	0.0669337366796851	1.01049956432148	0.3122560080604	0.426213509196824
AATK	1895.42464737445	-0.230189403416418	0.1428235140852	-1.61170522158628	0.10702610089382	0.172778363212561
ABAT	13053.1351750909	0.593869828314714	0.0834458066741667	7.11683249265737	1.10435564679018e-12	3.40099334536975e-11
ABCA1	2076.14308699902	0.00533598827702442	0.117797357518506	0.0452980303585005	0.963869757374887	0.999052814291159
ABCA10	6.17485811902892	-1.2407112232057	0.201731896315446	-6.15029772617421	7.73376327481625e-10	1.131399256694e-08
ABCA11P	133.282849188128	0.170634140451647	0.0662498537827599	2.57561535171344	0.0100061890823303	0.0222974647830703
ABCA12	4.7788647735818	0.194313310392889	0.180396221058321	1.07714734406809	0.281414444935092	0.390539277055444
ABCA13	7.25597377672054	-1.91488465101405	0.278789701366728	-6.86856308402566	6.48517944998762e-12	1.63524603080522e-10
ABCA17P	75.6287646463601	0.476231150456817	0.123227548512806	3.8646484183472	0.000111249327537837	0.000440442578215306
ABCA2	8052.17602049623	-0.262825069669685	0.131524525954693	-1.99829703062546	0.045684467246942	0.0834434858177352
ABCA3	5145.84429359571	0.239572246154618	0.0621805717707053	3.85284726936985	0.000116752220578699	0.000459875345415894
ABCA4	7.60787503646106	-1.15115414754481	0.204385889156769	-5.63225843180324	1.77864884286585e-08	1.84149189620051e-07
ABCA5	167.554572305993	-1.08706467191617	0.21309489866385	-5.10131720061012	3.3729770428637e-07	2.56441946924891e-06
ABCA6	32.6620324712734	-0.677042104284302	0.251254840326714	-2.69464303017575	0.00704640767729667	0.0164745556671806
ABCA7	168.963000201109	-0.802926172654803	0.154102989000475	-5.21032186242881	1.88513305955575e-07	1.52994013310147e-06
ABCA8	596.756820670593	-0.271460627296528	0.176896189248732	-1.53457589137112	0.12488803836828	0.197250686977749
ABCA9	59.5428117833669	-0.424316299967027	0.143236926275393	-2.96233876976123	0.00305311661375763	0.00795249499125556
ABCB1	641.26309289694	0.0549297383325569	0.098980259849059	0.554956497551356	0.578924416285708	0.703733388495638
ABCB10	299.820339048134	0.0213963453280967	0.050968223993682	0.419797741642891	0.674633214827602	0.792818033345435
ABCB11	0.436518706435745	-1.85152616646255	1.44033303421368	-1.28548476114994	0.198622938538019	0.292854130618685
ABCB4	39.9761252600342	-0.0222586926223041	0.134107735587248	-0.165976202079879	0.868175678379723	0.952110085041925
ABCB5	0.111758029488982	-0.225561547711194	1.54975819019862	-0.145546285309379	0.884279574389825	0.964686764931137
ABCB6	985.219193712231	0.347779080225006	0.0643908274119936	5.40106555860514	6.62462080785515e-08	5.98412734348055e-07
ABCB7	363.000177017604	-0.0521480458502405	0.0607209154464262	-0.858815211642362	0.390442473771447	0.51166536405609
ABCB8	846.139836516165	-0.101068987225612	0.0533452781310906	-1.89461918217477	0.0581428716191948	0.102711283989334
ABCB9	266.353664797399	-0.452480870544063	0.114646596929652	-3.94674488961681	7.92208887431487e-05	0.000326402213100234
ABCC1	393.979111703926	-0.340013754942544	0.0752137923019851	-4.52063038621136	6.16557561759179e-06	3.38678271135963e-05
ABCC10	373.117169833022	-0.0849147338821605	0.0538618223085451	-1.57652916746356	0.114903902291105	0.183504663113953
ABCC11	16.7824648473628	-0.245591932973429	0.149952409519111	-1.63779917749257	0.101463593227984	0.165121667202053
ABCC12	11.0319935308688	-1.27800926626156	0.43529511462346	-2.93596050892294	0.00332516651101261	0.00856650064246489
ABCC13	0.356116558167138	-1.03519302159606	0.70310099681433	-1.47232478162653	0.140933194347842	0.218624421908201
ABCC2	5.39153046657434	0.424481344696338	0.151113673630352	2.80902008731974	0.00496925459323927	0.0121314546621115
ABCC3	45.0683380176947	-2.4263694313814	0.284591084929469	-8.52580969633232	1.51744565581864e-17	1.53651303578704e-15
ABCC4	444.427389857081	0.00845950930339983	0.108541004855111	0.0779383728268614	0.937877075129688	0.999052814291159
ABCC5	1310.34011851071	0.323864459714258	0.0714452290707045	4.53304529815072	5.81393408502961e-06	3.22181906030007e-05
ABCC6	43.1915546235981	-0.108446366129881	0.148396849332073	-0.730786176512458	0.464909768339392	0.589442436061613
ABCC6P1	9.2314932633391	0.138801547126168	0.180405495240324	0.769386469859281	0.441663918285391	0.565530997062994
ABCC6P2	21.6074190307606	0.0646785825591329	0.144667560983247	0.447084212380017	0.654814257615401	0.774752706612129
ABCC8	1159.29236084205	1.02674887469027	0.173017826754351	5.93435308922263	2.95006346841716e-09	3.70963767745045e-08
ABCC9	385.047193455361	0.023903251758688	0.154320331360404	0.154893730125965	0.876905096627388	0.95902197290057
ABCD1	259.909957219118	-0.174289814075141	0.0931079563892893	-1.87191106790515	0.0612189081093699	0.107389903205008
ABCD2	173.595497085392	-0.265797018551961	0.174191490119003	-1.52588980305741	0.127037310589329	0.20017122264931
ABCD3	1269.29731771614	-0.475512554395236	0.0661645103872518	-7.18682193236413	6.63168085090267e-13	2.14476099759963e-11
ABCD4	778.076770269728	0.0624967646805645	0.0710694092760421	0.879376447858452	0.379197197846445	0.500225432542439
ABCE1	1253.01963498968	0.0480455843183037	0.0463355247453656	1.03690601503567	0.299779660393728	0.412093157439385
ABCF1	1807.35808978895	0.097659704033998	0.0423341965444813	2.30687510347303	0.0210617838279373	0.0425993410617347
ABCF2	1554.53002579896	-0.148127439906903	0.0412173860232744	-3.59380965651871	0.0003258779418052	0.00111904818794612
ABCF3	1222.22193856028	0.0236984620481372	0.035991749062371	0.658441522446424	0.510254461544086	0.635231495736249
ABCG1	1186.42728469357	0.540961237242928	0.0978093874889029	5.53077011451793	3.18827932632473e-08	3.10949683162483e-07
ABCG2	1214.33662190312	0.0512087669962295	0.108206328709146	0.473251126871484	0.636034025671182	0.757945660477251
ABCG4	92.867833100652	-0.659032024233616	0.232739289240886	-2.83163202217875	0.00463111107941355	0.0114081885461544
ABCG5	2.07665616003911	-0.351091457018261	0.18608844426617	-1.88669134401532	0.0592018526039969	0.10428671366803
ABCG8	1.28506641424891	-0.757833429327846	0.434641925747732	-1.74358105933779	0.0812321684139942	0.136777828410817
ABHD1	22.8328457589742	-0.0705017805755975	0.132750124498351	-0.531086361252138	0.595358934975787	0.718472594685618
ABHD10	898.574651142971	-0.0176872828820257	0.0391141802393383	-0.452196179845719	0.651127659995664	0.771476379606454
ABHD11	310.449317605895	-0.0759777100283455	0.0775751336949621	-0.979408044942624	0.327378403662017	0.443071961289252
ABHD12	2215.81261902506	-0.133791678632663	0.0582777961007469	-2.29575734815663	0.0216897594041876	0.0436549013296898
ABHD12B	13.4960056240092	-0.973275519654	0.259126647503713	-3.75598391377349	0.000172661784204935	0.000645895339753084
ABHD13	344.577455554737	-0.0409236122024433	0.0551117992727882	-0.742556271840858	0.45775037117984	0.582082462924459
ABHD14A	703.613591217544	0.070436776175627	0.0819527220794595	0.859480617462994	0.390075409050412	0.511426914177681
ABHD14B	497.759030399043	-0.00867012525422547	0.0811206976987334	-0.106879323035715	0.914884717044038	0.985860662806802
ABHD15	140.392821954289	-0.620714562339641	0.0938444102199739	-6.61429445701315	3.73327976661265e-11	7.69104607470891e-10
ABHD2	5812.5206949466	0.550913710738243	0.107338690465326	5.13248026736646	2.85948715285287e-07	2.22009159117521e-06
ABHD3	348.632602122799	-0.0401717189344895	0.0965408763533878	-0.416110982745184	0.677328793710332	0.795067909101592
ABHD4	2143.73204166864	0.367055883677679	0.0882223163308311	4.16057862617471	3.17442304517685e-05	0.000144454921632283
ABHD5	764.36315970825	0.0575978027721497	0.0669170873496034	0.860733858173387	0.389384640759143	0.510728989642715
ABHD6	1115.37683289444	0.140883956198419	0.0841972217839901	1.67326134061596	0.094275859430659	0.155244329659219
ABHD8	650.50406074313	-0.510669891910325	0.135617885538153	-3.7655054853857	0.000166212474213479	0.000625763918880412
ABI1	2210.13561943993	0.099099400510889	0.0598252802530126	1.65648033894331	0.0976245834154807	0.159910175595443
ABI2	5088.23582362842	0.152596549136276	0.0539725347817702	2.82730002867713	0.00469423237732401	0.011547501167317
ABI3	179.898927997598	-0.756049981780086	0.134498415999966	-5.62125565687164	1.89574484536874e-08	1.94916030353171e-07
ABI3BP	510.356854968812	-0.113997813419644	0.203270321250422	-0.560818779241277	0.574921083353425	0.700099090294373
ABL1	3228.04597935369	0.21280478273075	0.0576146139465772	3.69359036108568	0.000221109889145067	0.000798108483774841
ABL2	1254.4733270369	0.340968151759835	0.052418342007679	6.50474888560736	7.78232699857002e-11	1.48614160484825e-09
ABLIM1	5809.12324194037	0.0880889605706224	0.085971745950275	1.02462686545382	0.305539283160657	0.418760522735958
ABLIM2	423.901487980893	-0.461325361726665	0.169151911713462	-2.72728435081559	0.00638579831150353	0.0151053497241289
ABLIM3	1268.31979775566	-0.0626001974472444	0.136860120555226	-0.457402764174709	0.647381577922532	0.767933323720638
ABO	3.3526287436581	0.231509808796573	0.212360142272728	1.09017542707827	0.275635875555199	0.383924942977137
ABP1	0.701674565945739	-1.41861421128844	0.536360337248138	-2.64489022168719	0.00817174235207438	0.0187208596409759
ABR	6737.37950760873	-0.301737328974312	0.0965341469614831	-3.12570565413195	0.00177378996027019	0.00494309767026305
ABRA	0.623209682528727	-0.386449168830585	0.528728949522153	-0.730902231057792	0.464838873168408	0.589429832617166
ABT1	397.002199248259	-0.0392820012093717	0.0401376261672119	-0.978682721437595	0.327736772053727	0.443432850952783
ABTB1	434.515339522381	-0.456366085355263	0.141872734453814	-3.21672862028208	0.00129661181933393	0.00375621219082059
ABTB2	552.448521087042	0.686257990591929	0.146786946291899	4.67519767886746	2.93670603537954e-06	1.76879148938774e-05
ACAA1	1367.63136599701	-0.234133248805661	0.0628915097629006	-3.72281170683193	0.00019701645102601	0.000721510729566946
ACAA2	462.959582280796	-0.91332979692876	0.122433266990806	-7.45981724883111	8.6642569576371e-14	3.49826157746767e-12
ACACA	3018.91231172876	0.405955165861235	0.0657523407688236	6.17400325394528	6.65821694911792e-10	9.95900354183608e-09
ACACB	353.690001725123	-0.64595688784937	0.148645278028396	-4.34562669206332	1.38878586015365e-05	6.96373309187754e-05
ACAD10	516.823222411756	0.0621177382647492	0.0599227915455276	1.03662958054205	0.299908521972367	0.412223189935722
ACAD11	600.20139229874	0.0517668203774742	0.0674329056255634	0.767678923179156	0.44267796096557	0.566379449925517
ACAD8	917.62182881344	-0.00920066242882563	0.0452418488576392	-0.20336618995782	0.838848824112534	0.930984520735477
ACAD9	787.316018137279	-0.020995720585476	0.0347994277589538	-0.603335225248749	0.546285703933734	0.671187695449998
ACADL	14.69219046424	-1.56997215343704	0.265525777256131	-5.91269205446151	3.36561057734815e-09	4.17249413884059e-08
ACADM	815.708077996109	-0.53812658209926	0.0654305497835314	-8.22439340460355	1.96181179101026e-16	1.56782810074952e-14
ACADS	197.542914904077	-0.701894898920483	0.140322625908251	-5.00200801102033	5.67362322412255e-07	4.08974555179017e-06
ACADSB	859.086959301755	0.0895077447707858	0.0747817608790635	1.19691945895119	0.231337948828852	0.332472016820242
ACADVL	3302.47758964915	-0.184969498482036	0.0680703409018003	-2.71732881063247	0.00658111905391242	0.0155123513105017
ACAN	321.324815802772	1.42339508788655	0.229183068863928	6.21073404306173	5.2737665492334e-10	8.12058511016302e-09
ACAP1	12.5727166148486	-1.20023550747164	0.16567002333274	-7.24473554917672	4.33283778277079e-13	1.47012425822434e-11
ACAP2	1186.32583010493	0.200286851863199	0.0589356012652022	3.39840177352116	0.000677807981157909	0.00212943573027842
ACAP3	3103.7587186615	0.328691999792118	0.109688492657056	2.99659510154618	0.00273013065797069	0.0072236696663573
ACAT1	1769.24683238034	0.0440732230116988	0.0616207197769936	0.715233823480163	0.474464572247254	0.599591272037499
ACAT2	1194.74852850466	0.420025242309412	0.120288536544498	3.4918143854384	0.000479751509123994	0.00157180995874268
ACBD3	973.325482559698	0.135485251783829	0.0499806556466698	2.71075379125917	0.00671304527382437	0.0157695002545565
ACBD4	331.262222329043	0.0805754704747315	0.0832269933943672	0.968141070444879	0.332973920792092	0.449104932569848
ACBD5	2223.76060793041	0.182054190885545	0.0623059522122424	2.92193898691068	0.00347859677098104	0.00889777298647973
ACBD6	551.931583079659	0.219775849356199	0.0552455616667704	3.97816300034816	6.94497566768439e-05	0.000290161653516993
ACBD7	1244.3397498141	0.00547313297463481	0.187911886629089	0.0291260604787497	0.976764051355414	0.999052814291159
ACCN1	138.448782038221	-0.368821000869664	0.227371633948552	-1.62210648032339	0.104780550870677	0.169670779730445
ACCN2	4287.21678838581	0.791202078648624	0.111033142424435	7.12581902459515	1.03463588789302e-12	3.22219936744782e-11
ACCN3	160.478318544487	0.439116288051711	0.127271519908557	3.45023213651579	0.000560104700608729	0.00180180055052775
ACCN4	3123.0813255696	0.905426277166199	0.184818892355899	4.89899201117737	9.63295605320144e-07	6.5368901778567e-06
ACCN5	0.00496235666848214	-0.0338383586125489	2.90048782817136	-0.0116664370330706	0.990691741163476	0.999052814291159
ACCS	65.5277914765579	-0.6383499972056	0.191113969586321	-3.34015351461408	0.000837320909883836	0.00257207534897608
ACCSL	0.10073701721893	0.0648329114208931	1.27290216578665	0.0509331456599626	0.959378793360015	0.999052814291159
ACD	623.014440721639	0.21015710792247	0.0648491151104233	3.2407089528457	0.00119232851806932	0.0034885981148957
ACE	264.842467214936	-0.206162514132931	0.178512667793548	-1.15489010769454	0.248135430875494	0.352345024459035
ACE2	3.67165132568313	-0.142280105725731	0.192533912797041	-0.738987244682009	0.459914742775041	0.584143371988526
ACER1	0.0302613554848523	-0.00173470848673631	2.7068363742593	-0.000640861968323076	0.99948866616487	0.999870641425771
ACER2	30.125026432602	0.418790488178058	0.117392504578166	3.56743805477978	0.00036048856182549	0.00122077548340133
ACER3	643.307826608071	0.11919401942716	0.0679674090434903	1.75369373505016	0.0794829996203584	0.134405981696051
ACHE	430.444990301702	-0.0385152115401771	0.143117961926909	-0.269115148242868	0.787841073702708	0.890627636510483
ACIN1	2909.01757591629	0.159013611161434	0.0487132375425329	3.26427926336439	0.00109742938496439	0.00325027324735241
ACLY	3995.41330688875	0.187684141060372	0.0645332187404687	2.90833379650837	0.00363360264761719	0.00924777934003374
ACMSD	0.203008087807259	-1.1468100104764	1.46866653604991	-0.78085118869858	0.434890023284363	0.55858042590527
ACN9	152.257769631606	-0.449284104212779	0.119263200994163	-3.76716456096769	0.000165112170489861	0.000622348348718361
ACO1	1059.51224197368	0.136127434023574	0.051650594816948	2.63554436315817	0.0084002444262035	0.0191694073395606
ACO2	6400.04966077515	-0.0522641442870997	0.0695768980291322	-0.751170945637968	0.452549783369177	0.576416807847727
ACOT1	379.061336604473	0.0422950234132061	0.11502023542291	0.367718108537113	0.713083436535172	0.826998900371206
ACOT11	63.8613084173609	-0.319992819157195	0.191776030945301	-1.66857566912762	0.0952015041359209	0.156591009524469
ACOT12	0.254424496408484	-1.40132169748786	1.24644276921312	-1.12425675057068	0.26090412034887	0.367107725521508
ACOT13	617.16661709113	-0.142394492403544	0.0511701226420174	-2.78276629117592	0.0053897615073139	0.0130238843010642
ACOT2	230.370532621576	0.258200426642437	0.112883179433649	2.28732418716293	0.0221769077313521	0.0445056963291844
ACOT4	21.9019715996814	-0.802078472690215	0.183812240008392	-4.36357487756853	1.27954117074733e-05	6.47301235737728e-05
ACOT6	3.36549303682814	-0.486876115346291	0.215637654141902	-2.25784368357995	0.0239554066868973	0.047605586243793
ACOT7	1188.50029282418	-0.444146211549195	0.118832332413658	-3.73758725868574	0.000185794618415813	0.00068665544050484
ACOT8	534.188845591003	-0.171885375098128	0.0538560230453769	-3.19157199842447	0.0014150083962078	0.00405246000039374
ACOT9	244.767025693794	-0.307019130299158	0.114264684760682	-2.6869118043093	0.00721159916766131	0.0168079450352579
ACOX1	2015.6154727939	0.0545800967223261	0.0423800511329538	1.28787236596527	0.197790396336403	0.291849108502788
ACOX2	107.311038211416	-0.54183981717033	0.146633461842329	-3.69519897002062	0.000219714659380365	0.00079425822661986
ACOX3	429.796938344751	0.137195001953675	0.0534280051853747	2.5678481065812	0.0102331985091132	0.0227299941617376
ACOXL	1.32586981870994	0.573302869922965	0.237134212760255	2.41763035054996	0.0156219375841803	0.0327723476383607
ACP1	1216.54689933451	-0.173759750593687	0.0388940540177309	-4.46751450785957	7.91336461944368e-06	4.21453733720436e-05
ACP2	1047.5384492434	-0.0770853007585409	0.0497682197111411	-1.54888604024718	0.121409117301053	0.19235293918263
ACP5	65.1323761344091	-0.427401222313436	0.247017954826054	-1.73024354692923	0.0835867710209508	0.140266217053812
ACP6	158.591910641454	-0.0677010782931007	0.0958706518801428	-0.706171043644727	0.480081775382359	0.605187168289325
ACPL2	894.073591113812	-0.142041177766809	0.0853548234612197	-1.66412596273888	0.0960872596642964	0.157819753877494
ACPP	6.73887041737327	-0.407208585530952	0.337915703501514	-1.20505966816996	0.228180268183645	0.328764537485785
ACPT	0.117817426411831	-0.575447678558429	1.66709674379332	-0.345179534841544	0.729959403170049	0.842126870514719
ACR	3.90076109635952	-0.0329988857373571	0.162096865964141	-0.203575100240724	0.838685552787892	0.930963587838939
ACRBP	18.221347971666	-0.175160811884119	0.125519860251147	-1.39548284656825	0.162870283942987	0.247677072692289
ACRC	41.1079339114075	0.0921375550456706	0.10218566685134	0.901668089906506	0.367233208881866	0.487493325538835
ACRV1	9.88684450331841	0.308155746090795	0.228451691350163	1.34888800459115	0.177372941713749	0.266190167823691
ACSBG1	1253.20842597267	0.19988448654478	0.164027283538239	1.21860511393631	0.222994107129166	0.32256589617637
ACSBG2	1.67830209811631	-0.151893266021152	0.245999899452306	-0.617452553270661	0.536936267493119	0.662351538035267
ACSF2	235.969183787649	-0.601568139687064	0.120001644578771	-5.01299912845932	5.35881396845993e-07	3.87582132199009e-06
ACSF3	385.503341978251	-0.0499433685580501	0.0551567133717796	-0.905481228031313	0.365210500373692	0.485374592992523
ACSL1	880.834127820477	-0.723954016289148	0.108055844565972	-6.6998135935826	2.08685570914774e-11	4.5863397062406e-10
ACSL3	2928.616364154	-0.0437007840387748	0.0765044096697942	-0.571219152299778	0.567851097167448	0.69288581824722
ACSL4	1166.64639316582	-0.000733730152465264	0.0790293953224484	-0.00928426884036714	0.992592331654679	0.999052814291159
ACSL5	193.471505723299	-0.161648695458074	0.0980667202671306	-1.64835425328539	0.0992799976777482	0.162209610128212
ACSL6	1156.41816356743	0.684004693990582	0.14858483387159	4.60346238689283	4.15524270097986e-06	2.40750131326994e-05
ACSM1	0.639252000274926	-0.218982054331789	0.349016467087889	-0.627426138826411	0.53037993816639	0.655814248261045
ACSM2A	0.102818964498029	-0.371937340903473	1.98555421193807	-0.187321675060401	0.851408429531229	0.940229488216409
ACSM2B	0.00941580535042124	-0.0624062191588631	2.90048782817136	-0.0215157666075115	0.982834226440392	0.999052814291159
ACSM3	1.06879273330464	-0.416319238114278	0.277000193273038	-1.50295648965094	0.132850264416933	0.207833764845255
ACSM4	0.0048269854272752	-0.0338383586125489	2.90048782817136	-0.0116664370330706	0.990691741163476	0.999052814291159
ACSM5	159.321577073205	-0.648846050611554	0.173672916765137	-3.73602322513538	0.000186953408735584	0.000690146769411377
ACSS1	1823.45379990025	0.0107902213684942	0.120491583185556	0.0895516606490044	0.928643499203448	0.99418573344006
ACSS2	729.691036776741	-0.0380105747616507	0.0556966868293132	-0.682456658115716	0.494950239944799	0.620371849678056
ACSS3	159.919092315166	-0.617160468753766	0.185443587513904	-3.32802269966598	0.000874647394000265	0.00267483880454857
ACTA1	8.31484026302525	-0.40443830250015	0.177795182206895	-2.27474275444381	0.0229213661011902	0.0457717315846174
ACTA2	876.371151554519	-0.937346231518809	0.17799609661515	-5.26610554581695	1.39348188967593e-07	1.17377786351623e-06
ACTB	71920.0179003931	-0.243118678476331	0.0559578710940884	-4.34467347886675	1.39482978413797e-05	6.98903671734068e-05
ACTBL2	0.0103910872012852	-0.0624062191588631	2.90048782817136	-0.0215157666075115	0.982834226440392	0.999052814291159
ACTC1	43.7861634813409	0.317988913406797	0.297378000690064	1.06930880115175	0.284930546101931	0.394795584009983
ACTG1	44843.2826662375	-0.125493350316253	0.0627161445849053	-2.00097361129015	0.0453952337755316	0.0830206923138327
ACTG2	37.824888499743	-1.71746598576098	0.317119532358595	-5.41583160452851	6.10044960451069e-08	5.54429959357315e-07
ACTL6A	487.938663465777	-0.185765650711343	0.0792063434744155	-2.34533804443765	0.0190098353766502	0.0389997046976149
ACTL6B	784.225841179505	0.4415240431541	0.1757159880914	2.51271411298349	0.0119806378986829	0.0260343299955649
ACTL7A	0	NA	NA	NA	NA	NA
ACTL7B	0.0104414452092369	-0.00409231936276079	2.90048782817136	-0.00141090726980945	0.998874259246189	0.999870641425771
ACTL8	0.788520391154003	-0.899121663042731	0.454693219141516	-1.97742483325421	0.0479936292384291	0.0870810385093554
ACTL9	0.00487661567204269	-0.0338383586125489	2.90048782817136	-0.0116664370330706	0.990691741163476	0.999052814291159
ACTN1	1467.99732131469	-0.955468701624628	0.147600155509829	-6.47335836689552	9.58482577092751e-11	1.79101961748539e-09
ACTN2	600.897360546266	-0.566471076541908	0.127235280922607	-4.4521540914935	8.50131217220087e-06	4.49713833179335e-05
ACTN3	0.637545402731448	-0.522043880448597	0.330955793603031	-1.57738251010879	0.114707537325948	0.183206191418271
ACTN4	3516.32718977504	-0.493237655247551	0.0663095879711773	-7.43840627485043	1.01907238059974e-13	4.03044168523497e-12
ACTR10	1060.31362004137	-0.184546865332088	0.0527578600078864	-3.49799755533111	0.000468765429450063	0.00154077556178862
ACTR1A	3993.00089267938	-0.0728820747257156	0.0490864151516748	-1.48477077620179	0.137604555767297	0.214152418809007
ACTR1B	1627.01540505663	-0.129287407045726	0.0570503758298726	-2.26619728906375	0.0234393065574334	0.0466903068102547
ACTR2	4467.5470413359	-0.14577042375472	0.0461366301036207	-3.15953773449268	0.00158019636310705	0.0044673289961249
ACTR3	2137.20266957265	-0.155219629747966	0.0486908075816607	-3.18786311949423	0.00143328368462358	0.0040993354718456
ACTR3B	493.436430448149	-0.258320664657445	0.101658193703167	-2.54107077105578	0.0110513547449083	0.024307308299015
ACTR3C	9.00347257764471	-0.880334460956126	0.186275034759094	-4.72599273485386	2.28993835798416e-06	1.42220320627533e-05
ACTR5	218.899478476658	0.218611185430925	0.0511383178051283	4.27489981708006	1.91223260445927e-05	9.23640823432624e-05
ACTR6	779.954054114582	0.0340219559929542	0.0387413659136995	0.878181633263569	0.379845157631514	0.50088534701936
ACTR8	603.954793634541	0.297659415773798	0.0496392806433125	5.99644902013501	2.01678883689402e-09	2.6588068238262e-08
ACTRT1	0.0146918333653435	-0.0326601799090747	2.90048782817136	-0.0112602368442503	0.991015820726465	0.999052814291159
ACTRT2	0.0101472052193348	-0.00409231936276079	2.90048782817136	-0.00141090726980945	0.998874259246189	0.999870641425771
ACVR1	632.568077637719	-0.0164781439112372	0.055626416930631	-0.296228749225144	0.767055394867913	0.872997783601803
ACVR1B	1275.97738213442	-0.00348249684683268	0.0655755511859856	-0.0531066347723958	0.957646945130907	0.999052814291159
ACVR1C	143.315786566936	-0.169611241284939	0.198069154992769	-0.856323344698123	0.391818952031465	0.513052033330301
ACVR2A	382.933702180833	0.0929714560883206	0.0591551542619158	1.57165435959611	0.116030732270481	0.185151350009166
ACVR2B	721.890662562533	0.506675032890479	0.0803490592765494	6.30592364680437	2.86480246647585e-10	4.75713485713436e-09
ACVRL1	306.084526894847	-0.190297403039943	0.109888197522916	-1.73173650427979	0.0833204879740196	0.139892198751414
ACY1	453.556826065346	0.232268039849443	0.0867433734510373	2.67764591816974	0.00741415501558419	0.0171992033107111
ACY3	97.2667313718024	-1.24004035843386	0.283907741929209	-4.36775816681695	1.2552837391661e-05	6.36528251585536e-05
ACYP1	80.3179251403971	-0.465277729598849	0.109505658086298	-4.24889213699055	2.14830322577182e-05	0.000102159292811475
ACYP2	460.474855418214	-0.344332625729574	0.0795920489596302	-4.32621889033442	1.51690689010506e-05	7.52809321391633e-05
ADA	154.422589189688	0.37297255698688	0.135354959828008	2.7555145187203	0.00585999037156917	0.0140089263023668
ADAD1	0.0250500831507813	-0.148109800797806	2.90048782817136	-0.0510637553308344	0.959274717350874	0.999052814291159
ADAD2	32.0396315104883	-0.88258914863158	0.250465630774575	-3.52379344783608	0.000425415737567149	0.00141536906322874
ADAL	257.729108560383	0.045501000981471	0.0551845397456964	0.824524426427231	0.409641642520135	0.53158822594001
ADAM10	1078.00165676283	0.105252969975542	0.0771118471739041	1.36493903119937	0.172272213377488	0.259663674438517
ADAM11	441.133507972521	-0.586472567731581	0.222413552888993	-2.63685625319915	0.00836782826187734	0.0191089619299454
ADAM12	72.349021017261	-0.931050493754022	0.215348330441851	-4.32346279092898	1.53599054088938e-05	7.60913346844278e-05
ADAM15	1179.35800340983	-0.373047150145334	0.0680004985422183	-5.48594728189715	4.11259541846153e-08	3.91617899522629e-07
ADAM17	736.054006977315	0.0634882308807778	0.0766809084940597	0.827953556206186	0.407696802782212	0.529666564210882
ADAM18	0.00472771755748984	-0.0338383586125489	2.90048782817136	-0.0116664370330706	0.990691741163476	0.999052814291159
ADAM19	206.126213852318	-0.314104679764438	0.135087725326362	-2.32519038280928	0.0200617823722275	0.0408716813524576
ADAM2	0	NA	NA	NA	NA	NA
ADAM20	2.35512342720478	0.435556422948699	0.153952459334652	2.82916183886297	0.00466700919062137	0.011486377926523
ADAM21	8.43652348883319	0.511636359549893	0.109717649910105	4.66320924636184	3.1131592042401e-06	1.86000923725683e-05
ADAM21P1	1.84865017062696	0.533680953999602	0.172784534802003	3.08870787892652	0.0020102899818642	0.00551553528858754
ADAM22	780.143129016203	0.699444617588752	0.143132918790633	4.88667892402767	1.0255113035504e-06	6.89856995153557e-06
ADAM23	595.346549422473	0.0490633729843033	0.142134796107118	0.345189034128753	0.729952262195079	0.842126870514719
ADAM28	133.692200467323	-0.712207150337058	0.161209686258502	-4.41789303649549	9.96677203204847e-06	5.19281710937008e-05
ADAM29	7.99752288416271	1.25000898697311	0.20061269391931	6.23095658879834	4.63595571414533e-10	7.28345926170354e-09
ADAM30	0.00975323134408538	-0.0624062191588631	2.90048782817136	-0.0215157666075115	0.982834226440392	0.999052814291159
ADAM32	4.46583503130679	-0.88963124507406	0.211573076425229	-4.20484146709688	2.61265220276041e-05	0.000121463205772563
ADAM33	51.1012926192051	-0.962562796265958	0.185068694999196	-5.20111084303124	1.98100906209746e-07	1.59836108723258e-06
ADAM3A	0	NA	NA	NA	NA	NA
ADAM5P	0.00466992847318023	-0.0338383586125489	2.90048782817136	-0.0116664370330706	0.990691741163476	0.999052814291159
ADAM6	124.855495639262	-2.96743883789674	0.303808695263956	-9.76745854926424	1.55298789661577e-22	5.77592036933633e-20
ADAM7	0.00487661567204269	-0.0338383586125489	2.90048782817136	-0.0116664370330706	0.990691741163476	0.999052814291159
ADAM8	86.2269321546533	0.438577371583291	0.138574790586054	3.16491455428856	0.00155128499850975	0.00439523174204199
ADAM9	1722.29937625766	-0.138105162400037	0.0802711644737522	-1.7204828571435	0.0853447071693144	0.142733192377598
ADAMDEC1	11.021188631706	-0.0642030714702394	0.445293072622076	-0.144181608512758	0.885357063473082	0.965384211079435
ADAMTS1	410.529339169151	-0.625933013898228	0.164401183218905	-3.80735102778902	0.000140463300681377	0.000539428164252944
ADAMTS10	361.497506345594	0.267514460806533	0.0941463023133733	2.84147602436992	0.00449052283477488	0.0111185138425997
ADAMTS12	32.6647869258693	-0.268921317077956	0.200605756816716	-1.34054635991158	0.180067782813062	0.269648541974807
ADAMTS13	336.157874741229	0.549765672680525	0.102705909029813	5.35281443758941	8.65966417467066e-08	7.60172700413624e-07
ADAMTS14	81.4409618499764	-0.962453648191486	0.218877063614407	-4.39723391888621	1.09639165481346e-05	5.65144312475809e-05
ADAMTS15	43.5400518766299	-0.587681568855284	0.240746922866896	-2.44107613861466	0.0146435670535785	0.0310036539714419
ADAMTS16	18.5602886519703	-0.884277890673346	0.207038828664262	-4.2710727083339	1.94534966142033e-05	9.37997069356001e-05
ADAMTS17	87.031562430529	0.0773135401054854	0.157667070266621	0.490359464247957	0.623879555445261	0.746232333620592
ADAMTS18	15.3587877072892	-1.00379639686264	0.413083513932823	-2.43000837120284	0.0150984741014487	0.0318229817465341
ADAMTS19	34.8136448575231	-0.30859312109932	0.245605860843387	-1.25645666613834	0.208950447705087	0.305657791287828
ADAMTS2	48.1791110134623	0.0739301533349936	0.185544621057966	0.398449456057781	0.690298908621093	0.806669540346341
ADAMTS20	36.2163287980559	0.30872008181427	0.325099664726457	0.949616733914601	0.34230703251006	0.459227109374623
ADAMTS3	37.465530197928	-1.5593766019857	0.230134354318096	-6.77594010944713	1.23599875717268e-11	2.87211842609237e-10
ADAMTS4	525.556472487027	-1.06373675830495	0.218431071538538	-4.86989671758889	1.1165659533633e-06	7.44120797313794e-06
ADAMTS5	208.407361922017	0.490860407035511	0.131236585435109	3.74027109443669	0.000183821886878015	0.00068118706499728
ADAMTS6	213.078946866709	0.626253305817312	0.142805375033315	4.38536228535666	1.1579289724997e-05	5.93384905356232e-05
ADAMTS7	59.1348405801948	-1.2857075288196	0.211974857769538	-6.0653774808399	1.31644092220217e-09	1.81727105177658e-08
ADAMTS8	208.814110948499	-0.527643908220031	0.155236125300746	-3.39897628337349	0.00067638581313644	0.00212600383976251
ADAMTS9	551.334538136353	0.156627788590674	0.158693542433851	0.986982747933563	0.323651096190833	0.439102925312571
ADAMTSL1	120.939227785064	-0.40128895747914	0.225578183907053	-1.77893513693898	0.0752503966817852	0.128178850786131
ADAMTSL2	585.373695598537	0.170493403872734	0.0948296792102934	1.7978907583843	0.0721943209324613	0.12371417391758
ADAMTSL3	60.7519751623269	-1.20172427549444	0.181069887961884	-6.63679802876674	3.20570416256097e-11	6.73894766347055e-10
ADAMTSL4	44.4060177782131	-0.783082949638038	0.153213374874617	-5.11106129134534	3.20354020765466e-07	2.44790468652869e-06
ADAMTSL5	7.91074398870272	-0.139168053806709	0.184023641289911	-0.756250951406096	0.449498749572216	0.573323604611664
ADAP1	895.557967642924	-0.623971599431177	0.162168206610832	-3.84768144429549	0.000119240959991249	0.000468093059941665
ADAP2	196.534629849881	-0.690612397071437	0.11550867396927	-5.97887910353095	2.24678219308344e-09	2.92217670573192e-08
ADAR	6727.72668799406	-0.0644886819563796	0.0496176355863628	-1.29971291848707	0.193699381042023	0.286775321852003
ADARB1	556.284559757687	-0.205072228023976	0.113490104402998	-1.80696131264251	0.0707683115226347	0.121611731204185
ADARB2	283.321895260664	0.105253305744817	0.178876876646753	0.588412027970901	0.556255766306447	0.681412954121899
ADAT1	217.695687756044	0.134350851765579	0.0831778870710611	1.61522318607107	0.106262371190155	0.171703087878486
ADAT2	108.334208932639	0.264684030645421	0.0849576111306631	3.11548344077545	0.00183643659336081	0.00509930850188056
ADAT3	26.904055922777	-0.265748520087824	0.147433451947044	-1.80249812086932	0.0714670700853418	0.1226418043878
ADC	432.700043693445	-0.412250851866713	0.0851177983648702	-4.84329787407727	1.27701621759368e-06	8.38624572097173e-06
ADCK1	355.585211822197	0.198457545489271	0.0739181900013843	2.68482690776863	0.00725673774192657	0.0168927910362133
ADCK2	784.274256129235	-0.0625146552596278	0.0628703988387165	-0.994341636355748	0.320056571718546	0.435050189558384
ADCK4	598.309885933055	-0.551265783122232	0.0658801147569556	-8.36771133681168	5.87480956949683e-17	5.30929051747985e-15
ADCK5	145.263839489492	0.178400716067294	0.0976239219416304	1.82742828314109	0.0676354000552402	0.117016087174006
ADCY1	1604.33812652397	-0.676550084473738	0.249305530305418	-2.71373877524864	0.00665286042025657	0.0156547415169439
ADCY10	1.07361421159821	-0.518589622744858	0.22402960865456	-2.31482626720333	0.020622441801613	0.0418507895533259
ADCY2	3541.64140738984	-0.250628056520228	0.128449706520662	-1.95117656014194	0.0510360463092888	0.0918088676050271
ADCY3	1023.97722993805	-0.160714843385946	0.0689775443489096	-2.32995890043578	0.0198083234564156	0.0404277095448584
ADCY4	77.6298943418671	-0.121627649584811	0.11848565542762	-1.02651792865432	0.304647517153716	0.417841975697672
ADCY5	610.79256247608	0.169752705585646	0.117354105305275	1.44649993405911	0.14803703049632	0.227948739633665
ADCY6	1113.281023219	0.190018494168377	0.0619114720398632	3.0691968371553	0.00214635123360945	0.00584736341146736
ADCY7	680.16975658726	-0.0164484142040506	0.0861194582899858	-0.190995328241205	0.84852925330734	0.938482255000377
ADCY8	862.873305101866	-0.826799462636202	0.197035080149031	-4.19620436122765	2.71425357377523e-05	0.000125612979461146
ADCY9	579.970928951653	-0.211690986858065	0.0942673731405653	-2.24564427548442	0.0247268021201132	0.0489442033400446
ADCYAP1	51.0257034930367	-0.69581391579107	0.317553452096942	-2.19117100190948	0.0284394202076166	0.055328275507022
ADCYAP1R1	2096.0608836575	0.29308455604129	0.187902931549721	1.55976574513281	0.118815249148155	0.18889329375465
ADD1	9771.48604833684	0.0759114825428348	0.0477195832506542	1.59078259640489	0.111658510949784	0.179155468804622
ADD2	1363.41481484674	0.355545103862214	0.101491260884447	3.50320905232442	0.000459688535464173	0.0015147243377426
ADD3	5281.70376017454	-0.204385223050762	0.0938056483602863	-2.17881573896024	0.0293453592661622	0.056936120406057
ADH1A	0.070710738710845	-0.17196004355016	1.69701797546096	-0.10133071425095	0.919287935223207	0.988679444023676
ADH1B	23.2499864699137	-0.814677384957423	0.236779347836023	-3.44066065052942	0.00058029583197609	0.00185963900421169
ADH1C	0.169088204968963	-0.393435110287143	0.793149635779188	-0.496041468771064	0.619865153590127	0.742532800893965
ADH4	0.0831881579396127	-0.374292461876599	1.45423770771972	-0.257380523066961	0.796885036890149	0.898121014770133
ADH5	2179.28813415885	-0.0551868604756689	0.0440557903714127	-1.25265850437401	0.210330013527774	0.307241219715338
ADH6	0.0691089985917203	-0.0553301699207394	1.28219733177925	-0.0431526166443976	0.965579876315172	0.999052814291159
ADH7	0.152546383444467	-0.482674232746818	1.20259533761242	-0.40136047234733	0.688154747004698	0.804990639081993
ADHFE1	559.547843206544	0.256945164609007	0.117395414981162	2.18871550179568	0.028617524556754	0.0556355976002838
ADI1	1275.7201566518	-0.096773851202378	0.0702188778572576	-1.37817427671091	0.168149487204877	0.254540629503939
ADIG	1.49707634921678	-1.92165186803751	0.435470812363488	-4.41281439187135	1.0203546787689e-05	5.29762670802433e-05
ADIPOQ	0.194919102342371	-0.187567382063467	0.801571515032977	-0.23399956029594	0.814985320021445	0.912194923850613
ADIPOR1	1625.37740804038	-0.264960323693503	0.0500431591573719	-5.29463623310183	1.19253558273013e-07	1.01871193330392e-06
ADIPOR2	3582.14596740798	0.115983137279049	0.0903843694915604	1.28322118007228	0.199414597658166	0.293842157615919
ADK	340.764950008945	-0.263687874867544	0.0696461560741644	-3.78610808881899	0.000153025132985434	0.000583153905800648
ADM	155.147464157354	-0.54490034394447	0.241174149563503	-2.25936463311128	0.0238607124841692	0.0474466563277639
ADM2	5.51246013043408	-1.05988463985926	0.233890546785642	-4.53154116070637	5.85549248623465e-06	3.24020671484344e-05
ADNP	2296.60114400963	0.0434564761996337	0.0532060626576684	0.816757978864847	0.414066750567187	0.536301296274403
ADNP2	595.817686059618	-0.0189569924755036	0.08198661148284	-0.231220587515942	0.817143436791246	0.913817165927067
ADO	1222.79298679019	0.135102506215774	0.0518068654222642	2.60781085893904	0.00911232894254475	0.0205758834499493
ADORA1	1221.36885889062	-0.168141723268395	0.142555738703141	-1.17948056527233	0.238206871048345	0.340572254459599
ADORA2A	103.516409906564	0.000554699106922892	0.0827203339243435	0.00670571648598787	0.994649652444592	0.999870641425771
ADORA2B	80.0833881331374	-0.313451779808507	0.137572161210394	-2.27845355521553	0.02269956868141	0.04543202507487
ADORA3	471.337841475283	-0.917393793067318	0.149230841127198	-6.14748121861333	7.87230181226708e-10	1.14905899659808e-08
ADPGK	529.941720550896	-0.344423204077138	0.0501754226036473	-6.86438073073851	6.67803071529696e-12	1.67731316927069e-10
ADPRH	86.5445024798002	-0.769044212150971	0.103979426456434	-7.3961190050725	1.40222349653285e-13	5.37009948969213e-12
ADPRHL1	63.096703837995	-0.418427856171736	0.14055879795516	-2.97688840726442	0.0029118997802408	0.00763815838191469
ADPRHL2	526.298710719766	-0.549042295439919	0.0612015091817838	-8.97105811245806	2.93679456143208e-19	4.85449630923901e-17
ADRA1A	78.9081084438873	0.285679787041654	0.165471550334697	1.72645863572205	0.0842649347808344	0.141257158590737
ADRA1B	110.922286058185	-0.349160884277811	0.181128927128428	-1.92769255476372	0.0538933787170858	0.0962595072394199
ADRA1D	32.2647377389643	-0.543968046581791	0.211426044109866	-2.57285259662298	0.0100864155789379	0.0224452050738302
ADRA2A	104.843988512666	-1.06314151418626	0.191531940592498	-5.5507270009246	2.84484044168268e-08	2.81284325880077e-07
ADRA2B	15.8040412295688	-0.942267026232112	0.1715234149053	-5.49351834414181	3.94004159946922e-08	3.78353547833837e-07
ADRA2C	39.6393501049801	-0.832333781933856	0.16266935749264	-5.11672139586287	3.10892313863693e-07	2.38881897104641e-06
ADRB1	102.340137667271	-0.265971820309745	0.164481471870971	-1.61703210266983	0.105871351480711	0.171174083771067
ADRB2	69.9233996302523	-0.537599531615757	0.144104844142276	-3.73061387919049	0.000191013779059102	0.00070285511548764
ADRB3	1.12875914485505	-1.01726521221041	0.446548046059187	-2.27806441252591	0.0227227401741686	0.0454626718544369
ADRBK1	1971.44228141207	-0.19792555885159	0.0690514501928615	-2.86634905275387	0.00415236129105904	0.0103916495042808
ADRBK2	872.914102578791	0.041277454010212	0.12759252178406	0.323509978743667	0.746309051556876	0.855578960113217
ADRM1	1497.28067570153	-0.189973638614005	0.050834254897049	-3.73711858271053	0.000186141149409801	0.000687541984260038
ADSL	651.90060446633	-0.0387408880054701	0.0548519480655982	-0.706280986759839	0.480013414952149	0.605140437075456
ADSS	645.696080159749	-0.384179849203969	0.0633915950245172	-6.06042250641247	1.35764449229354e-09	1.86881455380477e-08
ADSSL1	80.2899308567758	-0.732788246825845	0.156565681668434	-4.68038869704347	2.86331528181964e-06	1.73159842246379e-05
AEBP1	2113.20822201895	-0.974822141481854	0.223486160331001	-4.36189041879847	1.28943451736179e-05	6.51965060543188e-05
AEBP2	481.810829369534	-0.170069371242149	0.0481574595926708	-3.53152705065099	0.000413167600308669	0.00137793781513531
AEN	511.794279117825	0.229596642569793	0.123397650440376	1.86062410224521	0.0627972787204092	0.109750530494552
AES	6728.57181867999	-0.144967937855179	0.0858017169311396	-1.68956919558525	0.0911104033908798	0.151043648343872
AFAP1	2237.21702756286	0.560901766292157	0.0889203621399574	6.30791140289463	2.82826025619999e-10	4.71133103832109e-09
AFAP1L1	188.95184682091	-0.0422267034984464	0.133695967893426	-0.315841264054476	0.752122995851755	0.860153671561288
AFAP1L2	1365.45781132492	0.779469738977658	0.170615251538179	4.5685818351546	4.91035345371561e-06	2.78330116632063e-05
AFARP1	2.03367472728142	-0.0805219775489841	0.17811366971203	-0.452081963608802	0.651209936636967	0.771526597314319
AFF1	899.074084457941	-0.186991431174719	0.0963859625509753	-1.94002763707242	0.0523763312281956	0.093949011867307
AFF2	452.409228933217	0.403144411904832	0.150015403382922	2.68735345047059	0.00720206981450666	0.0167897818481869
AFF3	938.200743267331	0.318642256902456	0.10120579026889	3.14845875968032	0.00164133881183463	0.00461589248522347
AFF4	3060.21589841674	0.220426192443271	0.0635465759535902	3.46873437530693	0.00052291618822745	0.00169371949092596
AFG3L1	274.954698578971	0.063825751292125	0.0740616940655837	0.861791673784907	0.388802167558858	0.510103379729212
AFG3L2	1204.96728328134	-0.138056516825461	0.0489793967192066	-2.81866511376045	0.00482238015835824	0.0118296337217971
AFM	0.00492473458716579	-0.0338383586125489	2.90048782817136	-0.0116664370330706	0.990691741163476	0.999052814291159
AFMID	344.329481363854	-0.402163895037774	0.112716640501108	-3.56791945936166	0.00035982706431118	0.00121978111181854
AFP	0.474881764780713	-1.83346199280155	0.757860161687494	-2.41926160720608	0.0155520509330504	0.0326647116686788
AFTPH	855.511365191373	0.0190826979489617	0.049689978764737	0.384035139948659	0.700952402844492	0.816553395435036
AG2	877.802538153117	0.440766686464809	0.144988400769941	3.04001343641407	0.00236567594389066	0.00637394437933203
AGA	305.22662231243	-0.278723944918955	0.0796051837758933	-3.50132908057378	0.000462943814603093	0.0015237122829176
AGAP1	713.176017153133	0.26064411848205	0.0931188065945705	2.79904917184846	0.00512533318200633	0.0124652846755536
AGAP11	11.3387467865535	-0.46970261143083	0.156932354784333	-2.9930259574345	0.00276226254571511	0.00729910611205497
AGAP2	2926.04077377848	-0.0781665250276569	0.160126837514988	-0.488153805075558	0.625440902389493	0.747481882008392
AGAP3	3249.96219921063	-0.144771297953311	0.0718054752762083	-2.01615959502296	0.0437832899698766	0.0804836829215297
AGAP4	309.185881716365	0.339504356194091	0.0900668551949378	3.7694705278571	0.000163594224108389	0.000617589750977208
AGAP5	40.1104758818826	0.383439037363849	0.0843792910819707	4.54423155785173	5.51360218013595e-06	3.07921068910855e-05
AGAP6	166.23608043165	0.265393257349757	0.0909740608163042	2.91724096922135	0.00353142832769439	0.00901859551797299
AGAP7	19.1320269599646	0.462068200156793	0.177874078446789	2.59772646015434	0.00938432174413612	0.021084198714172
AGAP8	54.0021696324961	0.164097501981513	0.12303053785866	1.33379488408017	0.182271088087865	0.272525925289471
AGBL1	0.509241210351399	0.730851561373396	0.378080333452903	1.93305892083497	0.0532289398182408	0.0952574901531209
AGBL2	5.69032884898458	-1.55097868998484	0.265641670550174	-5.83861216793504	5.26374396532307e-09	6.2111536479163e-08
AGBL3	10.1137348094766	-0.44825321833764	0.112563325808832	-3.9822314694123	6.82712407878474e-05	0.000286041117165721
AGBL4	44.222063813469	-0.919312606337856	0.234792626044444	-3.91542367333052	9.02455920714979e-05	0.000365135931100998
AGBL5	525.635421253271	-0.0932844718272985	0.0515362468633405	-1.81007499585025	0.0702841579171254	0.120890751878087
AGER	90.646179144078	0.219764824302874	0.141256484735092	1.55578573766021	0.11975905071039	0.190179688393654
AGFG1	1960.72766604429	0.0359225853391014	0.0458356173726907	0.783726442408614	0.43320064338939	0.556822523127655
AGFG2	1009.03214144167	-0.351129756124892	0.106191580541214	-3.30656869721055	0.000944461887244048	0.00285806491930839
AGGF1	1086.7293586245	-0.0829091601494847	0.0367829136409147	-2.25401285387198	0.0241953593492303	0.0480330784042407
AGK	644.087665364663	-0.359009419132748	0.0498044204674234	-7.20838463259647	5.66195115845975e-13	1.86810664814677e-11
AGL	485.851027286993	-0.522759843964727	0.0851465922154769	-6.13952749443925	8.27672984516241e-10	1.20174140544625e-08
AGMAT	20.0134374768963	-0.961886929759202	0.189325122043005	-5.08060905694655	3.76226671479559e-07	2.83011428487541e-06
AGPAT1	3053.96348710453	0.0688689918715029	0.0355881709202856	1.93516525549356	0.052970019864114	0.0948740752898962
AGPAT2	171.721748537711	-0.853118258348937	0.121026404252714	-7.04902590155077	1.80174614379637e-12	5.1931103459049e-11
AGPAT3	3475.18906143184	-0.115586124225022	0.0646438230928951	-1.78804592140105	0.0737685993361388	0.126043352872244
AGPAT4	1274.17488448735	0.102071526850257	0.0871486226575245	1.17123511235945	0.241504285261874	0.344420977580166
AGPAT5	2623.78041244068	0.0942898866298	0.0581817520381988	1.62060926882873	0.105101463137663	0.170111498626027
AGPAT6	1979.93835586581	0.0937315857783844	0.0401913122208293	2.33213549394408	0.01969356433588	0.0402289183840151
AGPAT9	11.2430017234895	-1.0146478402506	0.246069718937647	-4.12341609780809	3.732944726849e-05	0.000166925204664184
AGPHD1	17.0955820699347	-0.494810901688965	0.116083484747912	-4.26254348552252	2.02113151319548e-05	9.69461395466286e-05
AGPS	1001.85318436323	0.0355064420902757	0.0532081123468118	0.667312568031803	0.50457250015077	0.629436764755452
AGR2	1.25800905342426	-1.5280160601594	0.849297765074985	-1.79915233854936	0.0719945863836787	0.12341569679371
AGR3	0.391570443108797	-2.06923770847948	1.82258742670572	-1.1353297395558	0.256237186049171	0.361830255416981
AGRN	3998.56990931591	-0.162322127958129	0.106567390467919	-1.52318760218676	0.127711776935264	0.201086523319059
AGRP	0.198623726795575	-0.389900757254025	0.599126251223607	-0.650782295814485	0.515187030266774	0.640382875850595
AGT	11444.4372842827	-0.426714729941433	0.159963534032733	-2.66757503528345	0.00764008268089192	0.0176534287990979
AGTPBP1	649.961061002475	-0.271585301913757	0.0920957796472048	-2.94894405535335	0.00318861691431079	0.00825319206675196
AGTR1	2.8726312410568	-0.596029570908313	0.208898563982442	-2.85320090069365	0.00432812497598805	0.0107757385473235
AGTR2	0	NA	NA	NA	NA	NA
AGTRAP	335.121931641735	-0.884738625724046	0.106250171569098	-8.32693832544703	8.29599359385428e-17	7.35984018830925e-15
AGXT	0.147647489016813	-0.395792563425929	1.8025588472747	-0.219572617018484	0.826204019420799	0.920555545596688
AGXT2	0.0403137403762643	-0.0588685151159385	2.33451923920682	-0.0252165474275294	0.979882238214575	0.999052814291159
AGXT2L1	2864.1171384338	-0.0953447950505363	0.235752897436734	-0.404426821842657	0.685898879868562	0.80288611164859
AGXT2L2	317.427613889743	-0.239180221018018	0.0756976834324644	-3.15967689065952	0.0015794419036411	0.00446616340933878
AHCTF1	1199.03798179521	0.0349399559426604	0.0716825223822484	0.487426429504564	0.625956167723307	0.748022261725701
AHCY	2228.13180000861	0.0154255607970197	0.0555147506812601	0.277864182180807	0.7811166200214	0.885405897972915
AHCYL1	11047.7443536404	-0.620326129473919	0.131372412614309	-4.72189036594092	2.33662634326402e-06	1.44794468051029e-05
AHCYL2	2486.84129356325	-0.13937056636053	0.0845871882553147	-1.6476557411964	0.0994233350262453	0.162416361129114
AHDC1	1359.39901215432	-0.283514484343394	0.0758062087150599	-3.73999028772257	0.000184027365450508	0.000681556730718658
AHI1	359.679244202798	-0.113976992698685	0.0832127699406886	-1.36970554855852	0.170778835967128	0.257794465157996
AHNAK	9332.93883068847	-0.341816863587693	0.135517684522043	-2.52230448589234	0.0116588741362145	0.0254466342167237
AHNAK2	314.3084958902	-1.0209731145749	0.209072484085445	-4.88334521417771	1.04301030969989e-06	6.99970676341461e-06
AHR	278.373104809091	-0.582575392527073	0.161786034007665	-3.6009003873565	0.000317117066855299	0.00109460004872059
AHRR	54.0780503076486	-0.456159258867563	0.127533749133218	-3.57677290887977	0.00034786212237216	0.00118361249941548
AHSA1	1981.07881853856	0.0419492515612496	0.0524304599170967	0.800093144854726	0.42365683262231	0.546570008500845
AHSA2	605.407970834674	0.370442386004107	0.115741743770887	3.20059447814615	0.00137144399377126	0.00394287599814718
AHSG	7.50648493353392	0.879291847829055	0.190213552875897	4.62265613850734	3.78857448638573e-06	2.21563442899002e-05
AHSP	0.487087399255403	-0.578851904436686	0.597714011983565	-0.968442922252595	0.33282321189444	0.448934844905117
AICDA	0.0206501689311969	-0.119541940251492	2.90048782817136	-0.0412144257563934	0.96712495335399	0.999052814291159
AIDA	740.683653970415	-0.283669878164747	0.0541574836776725	-5.23787035330254	1.62440102758435e-07	1.34084147987543e-06
AIF1	431.164455478378	-0.866416894686228	0.141699515660423	-6.11446616911915	9.68807190852369e-10	1.38278458089187e-08
AIF1L	3570.39415706456	-0.0574068871722519	0.105454135703937	-0.544377769435444	0.586181540363188	0.710055805500692
AIFM1	579.385090663992	-0.141308537314465	0.0546812651141009	-2.58422216493351	0.00975989036227904	0.0218190127853978
AIFM2	199.938355494558	-0.0829594189225497	0.0782610150790193	-1.06003504859714	0.28912865464099	0.399753229965452
AIFM3	396.949113560137	-0.990543755411828	0.246263997472732	-4.02228407553364	5.76364839309581e-05	0.000246122675916257
AIG1	841.144140920035	0.128332200371387	0.067822356862336	1.89218137364162	0.0584668192125543	0.103175663045744
AIM1	33.4754389680298	-1.30937909900296	0.169923897540371	-7.70567953040198	1.30148863809327e-14	6.53786760018799e-13
AIM1L	0.100651466299085	-0.285053197337021	1.13273143556774	-0.251651175544669	0.801310698852323	0.901480362736544
AIM2	17.6105561445172	-0.0417447999804062	0.163132475304211	-0.255895093252034	0.798031843532658	0.898850580943878
AIMP1	930.878777734722	0.100961998628662	0.0453209067385942	2.227713562992	0.0258996219942388	0.0509716789832684
AIMP2	580.910312404877	0.0375625246019287	0.0651838117573547	0.576255416632496	0.564442552876355	0.689640468294188
AIP	1403.5444508796	0.132372553063526	0.0721489817383004	1.83471131364915	0.0665484750664811	0.115419918194399
AIPL1	0.200239493671435	-0.477961558218152	0.693329189821406	-0.68937175188206	0.49058935516082	0.615983777758245
AIRE	7.47916186882256	-0.205703337015903	0.249296153323148	-0.825136426189704	0.409294141388786	0.531293958954233
AJAP1	127.352047963007	-0.184310437301727	0.171370733939463	-1.07550707792869	0.282147765046285	0.391304250698827
AK1	1467.05268881888	-0.369616858405355	0.0870296437187238	-4.24702253866443	2.16630174396192e-05	0.000102895404458244
AK2	829.735303568387	-0.596225667704738	0.0712841786906151	-8.36406729594871	6.05923303655272e-17	5.45049148497347e-15
AK3	1702.70882713142	-0.0958044849110234	0.0541363174328793	-1.76968972870765	0.0767788418892036	0.130460622222562
AK3L1	187.657699002448	-0.81874920130495	0.145831028256106	-5.61436897960478	1.97280843129831e-08	2.0208747384168e-07
AK5	1406.78317931811	-1.00422827017595	0.258855047899594	-3.8795004320931	0.000104671215271955	0.000417820702447804
AK7	10.5509062144407	-1.96185750405429	0.281729720091899	-6.96361570733235	3.31648525260643e-12	8.98330879347455e-11
AKAP1	1676.90312782277	0.223569280456194	0.0563785148222482	3.96550496516393	7.32407276449201e-05	0.000304815079116151
AKAP10	492.143519094121	0.107333077074283	0.0582732182518579	1.84189376001832	0.0654906915483911	0.113779192826615
AKAP11	3333.08521058796	0.0958001769687088	0.085925814928028	1.11491729288749	0.264885865508919	0.371395648850135
AKAP12	1875.15388921785	-0.442761556955193	0.156255427758679	-2.83357553274241	0.00460304283463153	0.0113574582355211
AKAP13	1813.88832171448	0.0199421537671337	0.0699147776652355	0.285235173923033	0.775463974246508	0.880701935634944
AKAP14	1.89031384573212	-0.312037323824552	0.344892862903316	-0.904736970193627	0.365604750258381	0.485798410855176
AKAP2	322.4326546109	-0.448913501556669	0.156828409705465	-2.86245012877297	0.00420379411644401	0.010505411320846
AKAP3	88.8555795459521	0.131149102666904	0.090719342461644	1.44565755337517	0.148273275364432	0.228257991367358
AKAP4	0	NA	NA	NA	NA	NA
AKAP5	259.862508067908	-0.47229075298428	0.193046625327683	-2.44651131395123	0.0144246270056042	0.0306058459998227
AKAP6	3045.76175017544	0.143299914228545	0.111798335066446	1.28177145163545	0.199922831589664	0.294478869988127
AKAP7	584.920927522418	0.366769593974936	0.0807539508156255	4.54181610027144	5.5771682583908e-06	3.10842749617516e-05
AKAP8	592.705181173051	0.0112336964731209	0.0341772012467301	0.328689771641138	0.742390186215003	0.852703777253721
AKAP8L	1228.14172859885	0.0543704544011924	0.0496654202461221	1.09473460874295	0.273632921777768	0.381547275211394
AKAP9	1406.09968795595	0.275153659662419	0.0723134480939967	3.80501368576368	0.000141796350384344	0.0005443313649133
AKD1	163.138881951933	-0.139595234970437	0.07715444143833	-1.80929616452497	0.0704050045506928	0.121077075227672
AKIRIN1	1359.63792691511	-0.624344601063218	0.0676807970295388	-9.22484114350378	2.83981528771025e-20	5.96978561568654e-18
AKIRIN2	1101.37711055831	0.0562560853582818	0.0403316758140339	1.39483629734787	0.163065210503942	0.247930909681308
AKNA	836.220619785966	0.279680273179684	0.0874493602672296	3.19819690304231	0.00138289820664866	0.00397101194287437
AKNAD1	19.4773091818476	-0.896531520933815	0.227416217048077	-3.94224973298312	8.07208618484773e-05	0.000331875312106622
AKR1A1	1176.21719671199	-0.285806919709834	0.0587521919312259	-4.86461713708305	1.14678574930631e-06	7.61897505722568e-06
AKR1B1	2408.56776173167	-0.220838336667966	0.05269188052771	-4.19112649721868	2.77572840046326e-05	0.000128120733329259
AKR1B10	1.41322130409599	-0.625090129481512	0.553952064401854	-1.1284191713528	0.259142935021299	0.365186852470995
AKR1B15	0.271541227192204	-0.701794835705491	0.690463968234757	-1.01641051233955	0.30943394173216	0.423138827200733
AKR1C1	369.136628991555	-0.568163152437416	0.178618867539868	-3.18086862974092	0.00146834197821876	0.00419031044101383
AKR1C2	104.188733341471	-0.910028946641943	0.207954673005009	-4.37609279701073	1.20825591274804e-05	6.15911158475146e-05
AKR1C3	792.22815181753	0.155317778116233	0.138564801858609	1.12090354861344	0.26232892023147	0.368686137360503
AKR1C4	0.09921803041758	-0.0815425620062998	1.44498121222928	-0.0564315724773319	0.954998005821365	0.999052814291159
AKR1CL1	0.0100179118177289	-0.0624062191588634	2.90048782817136	-0.0215157666075116	0.982834226440392	0.999052814291159
AKR1D1	0.044484691217392	0.0291938982449193	1.89621765068675	0.0153958582941922	0.98771636763859	0.999052814291159
AKR1E2	3.66323438019357	-0.329926757155381	0.19542249167711	-1.68827423253055	0.0913585991889997	0.151429148810015
AKR7A2	752.376176240721	-0.536516431452547	0.0623291005478767	-8.60779999609387	7.44760500126769e-18	8.37422562351844e-16
AKR7A3	20.3432479639623	-0.795370960152098	0.135647564135659	-5.86351082100275	4.53181299841631e-09	5.44380517946407e-08
AKR7L	17.0196726365736	-0.546620538398688	0.111285600314963	-4.91187122908651	9.0211293978396e-07	6.15844131853928e-06
AKT1	3038.45779118463	0.0356030543984449	0.0527550945329536	0.674874241315317	0.499755667149263	0.624569263246203
AKT1S1	874.730224339232	-0.186136349657048	0.0548035943331127	-3.39642594472281	0.000682720285418241	0.00214243230893863
AKT2	1619.08889231006	-0.321215054495731	0.0630618991653051	-5.09364701582687	3.51240448347886e-07	2.6597456033861e-06
AKT3	1700.21160415408	0.242734616454287	0.0917448517139254	2.6457573577117	0.00815082590659529	0.0186773664731698
AKTIP	1155.0393245575	-0.19559335921538	0.0539564989456482	-3.62501947008101	0.000288939682584456	0.00101050514668777
ALAD	1890.23801116983	-0.0796721837868709	0.0835450507479465	-0.953643370535976	0.340264194244234	0.457025454315125
ALAS1	883.932731072305	-0.251368045139845	0.0628480149650939	-3.99961789213958	6.34448370263244e-05	0.00026803860787892
ALAS2	5.52789305333954	-0.844133452375734	0.504834479931706	-1.6720994423557	0.094504714582869	0.155550738726186
ALB	21.9646028659622	0.264318498946893	0.188851620109846	1.3996093800686	0.161630323519514	0.245981307591077
ALCAM	4824.58412490879	0.233384530111453	0.0856244038962159	2.7256777214395	0.00641696200126327	0.0151697891583464
ALDH16A1	305.54564389186	-0.45023340591075	0.0972819712439625	-4.6281279064716	3.68986108249704e-06	2.16540426177038e-05
ALDH18A1	1218.91938608484	0.140842708326011	0.0629685967771018	2.23671346567512	0.025305073344791	0.0499642795802203
ALDH1A1	1006.43162427865	-0.672341229616895	0.181965617302272	-3.69488060208669	0.000219990138602883	0.000794956890990238
ALDH1A2	46.3524812838572	-0.932382728628782	0.165377751934541	-5.63789698264755	1.72139430872797e-08	1.78987988875264e-07
ALDH1A3	30.2436242800967	-1.95830784653579	0.30380493750582	-6.44593818195687	1.14887486092161e-10	2.09813407084268e-09
ALDH1B1	528.990381572965	0.210535722851099	0.0613546905513739	3.43145277009933	0.000600357660471913	0.00191757508728766
ALDH1L1	1988.3733711058	-0.396851847747206	0.162641036583438	-2.44004745717181	0.0146853325698623	0.0310805791093388
ALDH1L2	647.323746313753	0.683768749997539	0.117976600190158	5.79579975092875	6.7996359646623e-09	7.75383016253354e-08
ALDH2	8563.59274514859	0.0777847542651685	0.104770268432067	0.74243156411882	0.457825901397768	0.582140232283552
ALDH3A1	4.7904564945988	-1.45492418597757	0.252699170698485	-5.75753447055649	8.53513442256819e-09	9.48675285818787e-08
ALDH3A2	1994.9039186274	-0.2237889653975	0.0595031586934859	-3.76095942318436	0.00016926288850805	0.000635269602900385
ALDH3B1	180.940248001409	-0.595899993833294	0.128883225933289	-4.62356516542917	3.77200167824697e-06	2.20794529229105e-05
ALDH3B2	0.367502813228827	-0.371051564885382	0.652990986592717	-0.568233823289836	0.569876207578313	0.695181396150157
ALDH4A1	1782.43742727198	-0.896315711987358	0.128144052594519	-6.99459470681432	2.66026830074882e-12	7.33945633901316e-11
ALDH5A1	3340.97251091958	0.306044266680629	0.0751716269458448	4.07127368549719	4.67567751575418e-05	0.000203711653874039
ALDH6A1	1409.31503108037	0.17733196268826	0.121017281167295	1.46534413083628	0.142827051965419	0.220964337653884
ALDH7A1	2437.02263923958	-0.102300668886062	0.129329620273479	-0.791007262448756	0.428939753526388	0.55210147035739
ALDH8A1	20.6223327220007	-0.201487942044638	0.162576937786199	-1.23933901565799	0.215219975643632	0.313465524196427
ALDH9A1	3216.95169418057	-0.0653487228737651	0.0675802573467277	-0.966979491340001	0.333554286160576	0.449668192830443
ALDOA	20669.0439544268	-0.306630591976913	0.0785276341438044	-3.9047476129918	9.43237720232897e-05	0.000380442492373394
ALDOB	8.51689100363162	-0.583986085561362	0.159059150488572	-3.67150260621641	0.000241128618893888	0.00086128103927096
ALDOC	27215.7020701014	0.321791233176778	0.135674220029979	2.3717934999418	0.0177019810915854	0.0366587765618656
ALG1	407.953300330144	-0.0514554052693958	0.0666670503713481	-0.77182663673853	0.440217113184547	0.563902435354957
ALG10	53.9773895489158	0.0711209446942122	0.0846026810813141	0.840646463979739	0.400546020591485	0.522181330518323
ALG10B	345.928388490562	0.323849798697796	0.0615237547122738	5.26381720706635	1.41094738254781e-07	1.1864227121076e-06
ALG11	13.6949036541756	0.410925079765543	0.113197393509446	3.63016379640626	0.000283241420514806	0.000993270910744579
ALG12	277.380457137251	-0.102734033707574	0.0533145714145888	-1.92694100283927	0.0539869828024455	0.0963999859107465
ALG13	514.635382634423	0.108028162436636	0.0463519686677689	2.33060570115017	0.0197741605941258	0.0403707659548605
ALG14	119.302308620913	-0.762120400698292	0.0671277473349937	-11.3532843117022	7.14282902323526e-30	1.3814231330937e-26
ALG1L	26.5373328487218	0.0970923177121427	0.198868809619796	0.488222954106111	0.625391927449492	0.747481882008392
ALG1L2	0.0347229032157821	-0.146931622094331	2.90048782817136	-0.050657555142014	0.959598399285821	0.999052814291159
ALG2	434.209271948237	-0.088054050003987	0.0465668724500076	-1.89091612494523	0.0586355415624084	0.103430442704941
ALG3	392.144173949285	0.00333891632173253	0.0593822484471742	0.0562275159503735	0.955160561273139	0.999052814291159
ALG5	388.462567312052	-0.0659890843467524	0.055369927077693	-1.19178564664098	0.233345305221967	0.334834411855828
ALG6	161.051411984874	-0.237339239869902	0.0928424824196187	-2.55636464778272	0.0105772211908466	0.0234000752494822
ALG8	494.729163844678	0.0040446159664933	0.0478701435573979	0.0844914108445	0.932665731576709	0.996726266712359
ALG9	625.984816393156	0.128870622986196	0.0449531944472257	2.86677342001776	0.00414679782498155	0.0103790694881769
ALK	184.080498657659	0.911250888305879	0.177400301756839	5.13669300041509	2.79615173345826e-07	2.17879027095418e-06
ALKBH1	209.313489440695	0.037558734913912	0.0510955133267764	0.735069137552426	0.462297389025594	0.586822755562811
ALKBH2	467.75571269813	0.109047384094501	0.0808897656638685	1.34809865252471	0.177626654783006	0.266529560361808
ALKBH3	277.40596406492	-0.0296260267623862	0.0556605878422623	-0.53226219684104	0.594544410767005	0.717668761966913
ALKBH4	470.437436876082	-0.0773469777538797	0.0542049399402009	-1.42693595526919	0.153598355835296	0.235406308095302
ALKBH5	1939.56198630642	-0.16766251341089	0.0358432229538234	-4.67766287721638	2.9016307526262e-06	1.75148373145414e-05
ALKBH6	104.585667537274	-0.475697137954118	0.0901771256028986	-5.27514194729253	1.32653369550241e-07	1.12522638907968e-06
ALKBH7	695.632728090358	0.101130927584979	0.090900471256085	1.11254569077066	0.265903596378223	0.372569409110689
ALKBH8	250.990787900142	0.1082905089374	0.0586939893540891	1.84500167954346	0.0650372942936878	0.113092858356218
ALLC	0.532851529497988	-0.794798382133418	0.560719542844836	-1.41746153183991	0.156348033622369	0.238938836053466
ALMS1	631.505323633576	0.239605389404908	0.0736343160474495	3.25399083289519	0.00113795951872178	0.00335643390149143
ALMS1P	8.34200610045818	0.877288657975572	0.160426390952419	5.46848091992401	4.53908915976597e-08	4.28015525840438e-07
ALOX12	5.24112133904481	0.306983672955936	0.110722482447547	2.77255048992751	0.00556188904905523	0.0133773080722209
ALOX12B	20.6667050646164	0.99564039568261	0.227853625541858	4.36964912590213	1.24446331813624e-05	6.32141007800461e-05
ALOX12P2	4.25963161414472	-0.571568697804842	0.260235503194013	-2.19635173060426	0.0280667777336758	0.0547240178650679
ALOX15	2.19782695355666	-1.79556113576744	0.476367250121743	-3.76927913350162	0.000163719711668029	0.000617942861760281
ALOX15B	68.4381047053442	-0.713969395277941	0.271402076553294	-2.63067034838159	0.00852166503366538	0.0194052751384774
ALOX5	143.816521458643	-1.05123913596327	0.160316846179753	-6.55725933371088	5.48056576877234e-11	1.08823554381989e-09
ALOX5AP	222.746656292346	-1.39382133047769	0.183564861120612	-7.59307267180005	3.1240721620911e-14	1.40510594453121e-12
ALOXE3	10.6651151418325	-0.639707158509015	0.215710483903308	-2.96558214016044	0.00302110657434913	0.00788079324897657
ALPI	0.0101645714028874	-0.0624062191588631	2.90048782817136	-0.0215157666075115	0.982834226440392	0.999052814291159
ALPK1	99.5408329027114	-0.622751904598781	0.131244984991405	-4.74495771887639	2.08549892177049e-06	1.30740840022824e-05
ALPK2	9.93701533106127	0.08504419929781	0.27003498496183	0.314937708200406	0.75280895033909	0.860581930462111
ALPK3	164.672067599821	-0.454917691049174	0.112849123789654	-4.03120268702415	5.54921617707287e-05	0.000237753302757176
ALPL	614.051333684673	0.315218487254683	0.11575456215011	2.72316253804243	0.00646602370764522	0.0152708387478152
ALPP	0.0463482374798073	-0.233813382436749	2.90048782817136	-0.0806117440541573	0.935750726198982	0.998492467298576
ALPPL2	0.0364324628494038	-0.17667766134412	2.90048782817136	-0.0609130849052754	0.951428428550331	0.999052814291159
ALS2	914.062796275771	0.140093033375687	0.0463509039672843	3.02244447000578	0.00250742082421558	0.00670448206004828
ALS2CL	54.0093314094243	-0.231789782605509	0.152669021654064	-1.51825026514368	0.128951320313845	0.202790578538767
ALS2CR11	3.19569374954516	-0.0156548521831329	0.153492699334302	-0.101990858529611	0.91876393108229	0.988679444023676
ALS2CR12	6.93402082884889	-0.292151482981056	0.223708848593079	-1.30594513725504	0.191571215310229	0.284081222519539
ALS2CR4	723.845178280058	-0.288852339069404	0.0618737374296817	-4.66841589127663	3.03530990630745e-06	1.81968052039635e-05
ALS2CR8	286.76716381773	0.31278930024234	0.072768758582052	4.29840093932134	1.72034757952037e-05	8.40614507021829e-05
ALX1	0.411380879544828	-1.84944251351747	1.08823194150507	-1.69949295088657	0.0892263416332553	0.148288858570693
ALX3	38.353140586978	-0.22587333600538	0.0905733685693403	-2.4938162240533	0.0126377957536626	0.0272723688770179
ALX4	1.50920799845374	-0.930125034172553	0.403958442709988	-2.30252653696933	0.0213054966661406	0.0430311283145647
AMAC1	0.0641389795365398	0.0898637221522043	2.03371888604892	0.0441868946434333	0.964755428410473	0.999052814291159
AMAC1L2	0.922265927422401	-0.229017289162736	0.230496636012965	-0.993581915659084	0.32042645204168	0.435411841854925
AMAC1L3	0.842763183814157	0.624028119696798	0.27510421232255	2.26833356868105	0.0233088833935723	0.0464640079191597
AMACR	326.442265121838	0.0329205975212685	0.0584111966240101	0.56360080642033	0.573025837886229	0.698362827192619
AMBN	0.0316173559147874	-0.00173596195581224	2.90048782817136	-0.000598506892168787	0.999522460619714	0.999870641425771
AMBP	0.0688958634597747	0.119611436877431	1.70150416219892	0.0702974694595239	0.94395689660509	0.999052814291159
AMBRA1	952.955983598255	0.0433751153629441	0.0411029366674167	1.05528020330792	0.291297192388356	0.402262599128227
AMD1	1955.2892490572	-0.216907718075454	0.067577340366247	-3.20976997466734	0.00132841232135166	0.00383741512993891
AMDHD1	14.2705698291643	0.266929218927524	0.143136174289065	1.86486204660226	0.0622007435362329	0.108835825566882
AMDHD2	229.529700479237	0.15598253888944	0.0819502518023391	1.90338083726288	0.0569908696298147	0.101005872569371
AMELX	0.0509760704082757	-0.174321303937171	2.90048782817136	-0.0601006845276346	0.952075444776297	0.999052814291159
AMELY	0	0	0	0	1	NA
AMFR	3348.70227663731	-0.215757885395074	0.0422810524440875	-5.10294500545822	3.34408204332178e-07	2.54423865923853e-06
AMH	167.464300092118	0.813455959238723	0.190979587553517	4.25938693060992	2.04988359565214e-05	9.81991944224784e-05
AMHR2	0.0144831011548687	-0.0326601799090758	2.90048782817136	-0.0112602368442507	0.991015820726465	0.999052814291159
AMICA1	29.4270199559889	-0.671950935134013	0.264717981569597	-2.5383652865204	0.0111371670813706	0.024468114433001
AMIGO1	271.022777449716	-0.361939342971531	0.162522326688767	-2.22701305319514	0.0259464014172233	0.051037774960242
AMIGO2	76.5011893926295	-1.55638241770629	0.184621669240723	-8.43011778686154	3.45317463096881e-17	3.28987179127767e-15
AMIGO3	129.473864032686	0.00206318051350422	0.0785059548363529	0.0262805607269532	0.979033559848933	0.999052814291159
AMMECR1	107.4036141944	-0.0145992891197091	0.0740270135645892	-0.197215697577359	0.843658746959211	0.93458646721447
AMMECR1L	661.769698583369	0.140388153051582	0.042794435200695	3.28052356324361	0.00103614609365582	0.0030943584699357
AMN	1.10597161444127	-0.140658959141745	0.336925351743815	-0.417478110251249	0.676328732144663	0.794472648182567
AMN1	457.686230192395	-0.151035164272822	0.0702713802255697	-2.14931261899228	0.0316096268698534	0.060653852928164
AMOT	1800.30254915095	-0.379900171340231	0.143947421669401	-2.63915926339225	0.0083111925451551	0.018995327797601
AMOTL1	1546.08660830554	-0.0546933773402335	0.0847755025889559	-0.645155447858809	0.518826454429865	0.643996125324023
AMOTL2	2938.43610458968	0.36181429697556	0.10649492308794	3.39747930215214	0.00068009732538097	0.00213558731496476
AMPD1	0.0560357526734263	-0.261203064279588	2.90048782817136	-0.0900548734397778	0.928243609228183	0.993929765088539
AMPD2	1656.7016952772	-0.256961117032306	0.0750571929545577	-3.42353753074511	0.000618117157433936	0.00196780013576499
AMPD3	286.318988991101	-0.797700636604876	0.15175871890497	-5.2563743444908	1.46923079880669e-07	1.23119106410623e-06
AMPH	999.143006078491	-0.190886094371518	0.16566684484092	-1.15222870668428	0.249227104301021	0.353635524371368
AMT	278.120390481275	0.440322504729385	0.146943428163406	2.99654438604584	0.00273058483197912	0.0072236696663573
AMTN	0.099729034372647	0.00533311026503407	2.90048782817136	0.00183869424075342	0.998532935079907	0.999870641425771
AMY1A	1.80032613016178	-0.166205401102093	0.252546080543791	-0.65811910738909	0.510461598846865	0.635448463034138
AMY2A	2.82216371487421	0.0501413359337912	0.211793498635492	0.236746341397793	0.812853581497795	0.911021573143681
AMY2B	193.528083695926	-0.221029375199216	0.135923918854483	-1.62612568164581	0.103922921777835	0.168500846341625
AMZ1	381.397851839193	0.932649484235918	0.147992302117515	6.3020134891566	2.93803590271961e-10	4.85866606031355e-09
AMZ2	1725.52543086472	-0.0801743343221229	0.0390045191209729	-2.05551397963557	0.0398293868109105	0.0741529015135743
AMZ2P1	367.165282294408	-0.369598454181857	0.122413881107118	-3.01925280727305	0.00253398985125216	0.00677084328864559
ANAPC1	457.822240367585	0.0907240826197768	0.0684376178477686	1.32564641308208	0.184956844948245	0.275859133284419
ANAPC10	97.6114758902436	-0.0789623050058802	0.0476304142398489	-1.6578126868319	0.0973552797829443	0.159509582429866
ANAPC11	1399.52067733858	-0.11909470207908	0.0733798686979737	-1.62298875961832	0.104591807743045	0.169385828316068
ANAPC13	1414.85737527923	0.0611115923847544	0.0442611945868737	1.38070363791939	0.167370102294137	0.253519562842153
ANAPC16	1177.26630253499	-0.113822295592601	0.0575165010374802	-1.97895027582484	0.047821604931439	0.0868177827254322
ANAPC2	1157.48939869579	0.235853794993211	0.0524962636429217	4.49277298280661	7.03017151297508e-06	3.80743536995066e-05
ANAPC4	439.270791111113	0.027261375830759	0.0488715329510078	0.557817080509581	0.576969297956505	0.701665485913275
ANAPC5	2467.92171125373	-0.0694197527218422	0.0431544809096738	-1.60863370983755	0.107696458670517	0.173657621368001
ANAPC7	1107.28752345616	-0.130076762853634	0.0384132224113579	-3.38624969966522	0.000708548802960036	0.00221450126846268
ANG	23.9423622929294	-1.13926033329637	0.140985421512638	-8.08069601149681	6.43981572267657e-16	4.66464554593876e-14
ANGEL1	973.135756682581	0.441716193736465	0.0758038228147138	5.82709654124102	5.63999890034791e-09	6.58970069361004e-08
ANGEL2	875.602652476828	0.113550010930373	0.0397835926632941	2.85419197535518	0.00431464497564951	0.0107477117245056
ANGPT1	92.1829465995493	-1.01790572204915	0.189490725101952	-5.37179707081434	7.7955809603776e-08	6.93817467895549e-07
ANGPT2	288.571399724091	-0.293731078464176	0.213698260231307	-1.37451319512962	0.169282416669707	0.255995147266568
ANGPT4	4.49890872982194	0.176682954500567	0.232626238145126	0.759514300318703	0.447544962918833	0.571132931893779
ANGPTL1	106.593610165303	-0.12838082598028	0.21694449549895	-0.59176807268153	0.554005905571241	0.679133518585556
ANGPTL2	6028.89505143182	0.787884887115333	0.154141919850193	5.11142515858799	3.19737492127106e-07	2.44415932716926e-06
ANGPTL3	0.0394083578272074	-0.175496764584926	2.33946704193672	-0.0750157029096856	0.940202217980983	0.999052814291159
ANGPTL4	381.673440245754	-0.472799735771162	0.163897044656798	-2.88473618765493	0.0039174178364693	0.00987817818585239
ANGPTL5	2.35721729604343	-0.908464039153078	0.248772781996582	-3.6517822884883	0.000260426623834611	0.000922294617279138
ANGPTL6	12.7743385783885	-0.366294953745186	0.155940095595439	-2.34894657686679	0.0188266077905728	0.0386607129613163
ANGPTL7	1.5230005971755	-1.89667315127581	0.405203602933824	-4.68079044101087	2.85770938134729e-06	1.7291867331566e-05
ANK1	477.35829060957	0.72622557081052	0.149918362366664	4.84414023303128	1.27161100550263e-06	8.35926473365765e-06
ANK2	6369.05558633258	-0.269954908710588	0.11487572620064	-2.34997346819021	0.0187747492814231	0.0385665056933322
ANK3	1576.96235003589	0.153596568429837	0.173496848140673	0.885298897794958	0.375995444299508	0.496641516749204
ANKAR	27.3012028116699	0.438839219837534	0.100657393685398	4.35973159814883	1.30222067769709e-05	6.57742175676723e-05
ANKDD1A	185.522658593045	-0.412794110918709	0.100646974206788	-4.10140606979983	4.10647198182238e-05	0.000181198193311533
ANKFN1	101.101014229161	0.468329159462066	0.153488517891594	3.05123253449381	0.00227903996799829	0.00616628888935184
ANKFY1	3999.24570126434	0.160102034453464	0.0627560712551538	2.55118000938141	0.0107358859681192	0.0237022870574687
ANKH	2178.07957145692	-0.134404109687001	0.0813889444235564	-1.65138042566996	0.0986609192000704	0.161348061671686
ANKHD1	1816.11364741854	0.271837174403069	0.0526204495219513	5.16599871100814	2.39158438159368e-07	1.89020195913453e-06
ANKHD1-EIF4EBP3	363.447104217017	-0.0477588327012478	0.104131106514473	-0.458641363756274	0.646491727715391	0.76724228992832
ANKIB1	2718.85296251199	0.0995664753012741	0.069741129556637	1.42765791053636	0.153390346370458	0.235124776001004
ANKK1	1.4298802156562	-1.8929755539188	0.405261731870993	-4.67099507565	2.99744125847748e-06	1.80200540686834e-05
ANKLE1	27.4880341613883	-0.012176479601393	0.127587731634036	-0.0954361320281107	0.923968417833037	0.99132943771525
ANKLE2	1180.69898940632	-0.0629738366486903	0.0353753669933178	-1.78016065983388	0.0750496715825391	0.127934973783753
ANKMY1	188.6780613426	0.152961064857117	0.0648523358343447	2.35860532838528	0.0183437532960274	0.0377855137655948
ANKMY2	708.157414487006	-0.0854488666378517	0.0528675834987301	-1.61628092269253	0.106033589549766	0.171376368200942
ANKRA2	372.100248401558	0.284266551248491	0.042802996572499	6.64127687338444	3.10977244604792e-11	6.57191802048275e-10
ANKRD1	1.5597239361194	-1.77936106853479	0.441960731113091	-4.02606146490303	5.67188687368037e-05	0.00024263280720411
ANKRD10	1436.09649725498	0.0911927678237235	0.0808052578320745	1.12854992695198	0.259087744021973	0.365135682386137
ANKRD11	2709.85078215834	-0.00147191041500156	0.0439014453411248	-0.033527607202097	0.973253850839663	0.999052814291159
ANKRD12	1266.1478802671	0.238984142071178	0.0655209180447984	3.64744800901261	0.000264857882150959	0.000935931196930304
ANKRD13A	1037.92501745643	0.0441717320315825	0.0505871057857797	0.873181640765053	0.38256408010371	0.503730208960087
ANKRD13B	905.567296227433	0.342804426527902	0.0745440274463577	4.59868400288119	4.25168101185728e-06	2.45708645419292e-05
ANKRD13C	569.832884277042	-0.310641013754398	0.0522596290908861	-5.94418711265926	2.77832100021001e-09	3.53272374385678e-08
ANKRD13D	634.422103063361	-0.157353545399495	0.0683951870268791	-2.30065231545688	0.0214112914262399	0.0431933218090622
ANKRD16	245.957905377395	0.18819529971828	0.0582746756135315	3.22945254927477	0.00124027461213144	0.00360596978331662
ANKRD17	2220.99465703942	0.129692746233599	0.0718108019208565	1.8060339498302	0.0709130367201766	0.121831583029956
ANKRD19	73.8044775741153	0.157297631883275	0.133986046047919	1.17398517624006	0.240400963259413	0.343151127716956
ANKRD2	9.47943083657453	-0.748144851967245	0.267488158229017	-2.79692700013546	0.00515911884363629	0.0125285482717134
ANKRD20A3	45.8547275262147	0.298429075411272	0.135881149023041	2.196250749695	0.0280740007349976	0.0547274643901677
ANKRD20A4	5.32908470358174	0.62347413267962	0.224049626029988	2.78275015998541	0.00539002946978892	0.0130238843010642
ANKRD20B	19.4693359735933	0.0598958357210036	0.135404346759898	0.442347953771471	0.658237435073969	0.777803628907592
ANKRD22	71.667072747921	-0.911304826441779	0.25778583297779	-3.53512377276487	0.000407584195389537	0.00136142976491082
ANKRD23	62.6712771005698	0.365076895256301	0.0806269125047721	4.52797811443782	5.95507476407394e-06	3.28778606729061e-05
ANKRD24	329.072003399938	0.00383297312276988	0.14528547068207	0.0263823567819636	0.978952366500734	0.999052814291159
ANKRD26	318.71106557248	0.322248339697706	0.0736349779882606	4.37629437125766	1.20713963299669e-05	6.15666679909178e-05
ANKRD26P1	0.274075418202661	-0.58516587441761	0.551749868493545	-1.06056368625026	0.288888232931102	0.399477936857394
ANKRD27	478.876106853104	-0.349531165557053	0.0586202394086506	-5.96263626834443	2.48200509457936e-09	3.19374441311808e-08
ANKRD28	1467.58714680385	0.179485023628531	0.0583951794673268	3.07362739982598	0.00211473371943371	0.00576935394750289
ANKRD29	62.1644760369203	-0.0577119609985218	0.189313384529736	-0.304848815322178	0.760481300672402	0.867250920160638
ANKRD30A	0	NA	NA	NA	NA	NA
ANKRD30B	1.9471950200734	-0.803218134243757	0.439620506325365	-1.82707158261924	0.0676890072911088	0.117072563138083
ANKRD31	1.31960518840752	0.778689029633515	0.297335875714755	2.61888689940847	0.00882171904733195	0.0200084492055119
ANKRD32	115.139915767273	-0.5667650618117	0.088119397916725	-6.43178545485872	1.26113667726251e-10	2.27734671692408e-09
ANKRD33	0.149814686783893	-0.308908635392813	0.815331332220248	-0.378874971665343	0.704780710773298	0.819807970161308
ANKRD34A	174.77240302595	-0.732975333997933	0.20544619145972	-3.56772412664384	0.000360095333824388	0.00122024810903968
ANKRD34B	2.81846947880493	-1.20242540077747	0.352169200173715	-3.41434003934572	0.000639367248213134	0.00202611217113584
ANKRD34C	19.2534146592558	-0.665265485888736	0.360524210372836	-1.84527270776282	0.0649978785245184	0.113034706471017
ANKRD35	133.991452505038	-1.38757495561197	0.205496546266542	-6.75230304752758	1.45516527593892e-11	3.31482879112589e-10
ANKRD36	230.553603290066	0.370266304523966	0.0927466311705801	3.99223454103653	6.54535864949476e-05	0.00027542914769632
ANKRD36B	37.460926222366	0.381936970434999	0.141862059108263	2.69231232674778	0.00709584592958174	0.0165741135601583
ANKRD36BP1	76.8713082865778	-0.00534758341821467	0.154652843848743	-0.0345779830821918	0.972416257954552	0.999052814291159
ANKRD37	91.5048920854716	-0.176636209714197	0.113535974982506	-1.5557730467494	0.119762069542209	0.190179688393654
ANKRD39	191.303351916486	-0.0740728465839195	0.0783445788833053	-0.94547507485172	0.344416390015387	0.461768664325656
ANKRD40	2661.70299629074	-0.0678214685153093	0.0624659904714246	-1.08573430123284	0.277596560390834	0.386266456432745
ANKRD42	223.64011321901	-0.32270020951819	0.0785994130227503	-4.10563129046251	4.03212191272252e-05	0.000178458656709285
ANKRD43	374.83810913093	-0.771092450294763	0.230688507137337	-3.34256985691838	0.000830064592926786	0.00255343553796788
ANKRD44	163.211607564699	0.377753674689061	0.121268475438156	3.11501957391808	0.00183932703791165	0.00510586836704625
ANKRD45	50.7324830247227	-1.07694250757772	0.171491678135713	-6.2798528726593	3.38893578227035e-10	5.51700488460509e-09
ANKRD46	1539.07393104802	0.0773158312396606	0.0661926434669459	1.16804265836987	0.242789558251867	0.34602432251961
ANKRD49	175.144480359659	-0.00866754620849497	0.0473300126770466	-0.183130020852465	0.854696000839726	0.942299661169781
ANKRD5	18.5061145558383	-1.01232496997991	0.182653665740452	-5.54231948138623	2.98491061126269e-08	2.93334203362909e-07
ANKRD50	670.282486129391	0.280076939225235	0.087882436343638	3.18695009922208	0.00143781579003859	0.00410743831304967
ANKRD52	1361.88770782371	-0.0405980506672349	0.0618732821672968	-0.656148328408754	0.511728691567479	0.636534145543803
ANKRD53	7.29251118341116	-0.572881220402889	0.158141308593246	-3.62259061531098	0.000291667236682737	0.00101820295260724
ANKRD54	520.623855175351	-0.102749096932011	0.0544823719761296	-1.88591452987819	0.0593064732008314	0.104423451538973
ANKRD55	58.8917258274585	1.17847520966293	0.242677811263128	4.85613086556624	1.19701608372259e-06	7.92546766833098e-06
ANKRD56	42.3856593260232	-0.895804058905344	0.35656501492417	-2.51231618754255	0.0119941570479641	0.0260578518656062
ANKRD57	298.332200168763	-0.0405467791908927	0.102458403190269	-0.395738933346403	0.692297630645433	0.808272633666325
ANKRD58	11.1164856557418	-0.804694215194699	0.160091990794854	-5.02644892601689	4.99645473540328e-07	3.64097342059907e-06
ANKRD6	878.630454925817	0.260953274510928	0.0774171266079457	3.37074347685936	0.000749656281875606	0.00232980113955877
ANKRD7	4.42523120948428	-0.102931388452173	0.199966511679035	-0.514743131676907	0.606732529098848	0.72962045323315
ANKRD9	64.0255847591447	-0.656290387852473	0.152161368435497	-4.31312096230707	1.60965990966678e-05	7.92738035471238e-05
ANKS1A	1102.28862069979	0.0260422028280667	0.0504275457989603	0.51642812307165	0.605555427967298	0.728459412632179
ANKS1B	1083.43891924147	-0.0670395743759622	0.146560476159339	-0.457419190580941	0.647369773356338	0.767933323720638
ANKS3	443.89212156685	0.113970957125187	0.0830784273569622	1.37184779191221	0.170110825842092	0.25688634120294
ANKS4B	0.221089867450287	-0.388722804548936	0.808110714570202	-0.481026668178358	0.630497545143455	0.752472849310362
ANKS6	652.636588884713	0.374767239452671	0.0754073722294373	4.96990185936184	6.69867987570397e-07	4.71646209211079e-06
ANKZF1	643.009561102948	0.283483665841788	0.0753115295924043	3.76414696894403	0.000167118579229115	0.000628441244855354
ANLN	1792.83074439221	-0.482387197619774	0.187951729914649	-2.56654832514089	0.0102716311494615	0.0228075024604575
ANO1	33.458115909124	-0.570419399174333	0.160576958743545	-3.5523116369724	0.000381862310812868	0.00128416224849954
ANO10	520.921844404875	-0.158725129477939	0.0638263687294603	-2.48682688107676	0.0128888101651042	0.0277583060794114
ANO2	21.2594835633468	-0.0648491196638435	0.14767521336611	-0.439133407602212	0.660564873591006	0.779908134055431
ANO3	151.699943814693	-0.881442630310474	0.263723433508287	-3.34229923592579	0.000830874361827729	0.00255511371565404
ANO4	170.801258061334	0.200732740615364	0.165983419893052	1.20935416769158	0.226526808699117	0.326942423898576
ANO5	422.607580935648	0.399154074617234	0.135181886892037	2.95271862077215	0.00314988937472619	0.00816716188593705
ANO6	1047.3407996043	-0.618997062510645	0.10256814655467	-6.0349834066731	1.5897902285171e-09	2.15916734687646e-08
ANO7	13.7902241461934	-0.623491962347479	0.151235789351695	-4.12264825026015	3.74541407245045e-05	0.000167444078042514
ANO8	1251.13738014431	0.695728688565988	0.0987941543622883	7.04220500754204	1.8922114151762e-12	5.42153611400113e-11
ANO9	0.735428106141748	-2.13617350610924	0.480888802463281	-4.44213609293253	8.90701921073714e-06	4.68867042829767e-05
ANP32A	2524.48397029859	-0.132981602638709	0.0516020146343328	-2.57706222481925	0.0099644011168356	0.0222120236975104
ANP32B	2106.39042210567	-0.0276172852474392	0.0702402536111622	-0.393183165316054	0.694184202663652	0.810035144172501
ANP32C	1.87185406515221	0.27544796315062	0.202327702120497	1.36139520324595	0.173388831168977	0.26112287765208
ANP32D	0.0259898456363159	-0.0314820012056007	2.90048782817136	-0.0108540366554301	0.991339901771768	0.999052814291159
ANP32E	1516.01463986873	-0.281375148729809	0.0628552106349484	-4.47656042971496	7.58552043319892e-06	4.06368124847739e-05
ANPEP	62.8702771239013	-0.448386171992214	0.155677911058169	-2.88021703878513	0.00397401495676233	0.0100009693251507
ANTXR1	4404.96882699374	0.082311757381189	0.0849491250930612	0.968953562394163	0.332568359222135	0.448745696459645
ANTXR2	243.713173393945	-0.45781481487569	0.128807798913165	-3.55424763670034	0.000379062108969512	0.00127629895325041
ANTXRL	0.299850050651367	-0.582809721950308	0.501720277267356	-1.1616228172491	0.245388709572101	0.349213954608127
ANUBL1	66.6824198354919	-0.660685559664966	0.144346610658045	-4.5770770553811	4.71517814222062e-06	2.69080983389043e-05
ANXA1	773.451672668445	-2.37610785159823	0.211327109034525	-11.2437437035588	2.48610905449633e-29	4.00677909282992e-26
ANXA10	0.00988197706074452	-0.0624062191588631	2.90048782817136	-0.0215157666075115	0.982834226440392	0.999052814291159
ANXA11	955.081421624772	-0.869655740047844	0.126282419503144	-6.8865939017441	5.71440459991816e-12	1.45416559161075e-10
ANXA13	3.05598069714326	-1.35021573862624	0.305465088872386	-4.42019657176052	9.86111589552379e-06	5.14608692443146e-05
ANXA2	846.269508247698	-1.53894759370708	0.166599081341341	-9.23743145110123	2.52485225704248e-20	5.54893666490927e-18
ANXA2P1	5.07168211978033	-1.07689609384914	0.179821811698642	-5.98868448536088	2.11545090693213e-09	2.77376931140925e-08
ANXA2P2	279.719447390767	-1.7779441996291	0.18327292337831	-9.70107404223088	2.98341324572544e-22	1.03034307450589e-19
ANXA2P3	0.539569139079309	-0.609949854777465	0.404603547367439	-1.50752473315203	0.13167620905656	0.206270685497641
ANXA3	60.5468226596013	-0.354054616807278	0.22673093798479	-1.56156288133483	0.118390999544757	0.188311697606349
ANXA4	411.116956396328	-0.283605896978535	0.0889776287706341	-3.18738429981779	0.00143565883403566	0.00410248845305107
ANXA5	4045.78258251351	-0.572353966900383	0.101325591267284	-5.64866150537021	1.61701893142439e-08	1.69044033155393e-07
ANXA6	4482.69179197487	-0.231455091484312	0.0678985053125466	-3.4088392729544	0.000652399051479009	0.0020603196694324
ANXA7	2063.69350363724	-0.13700020857317	0.055206712446651	-2.48158606991061	0.0130799117657279	0.0281229008948502
ANXA8	2.46972635271417	-0.823621416182662	0.354490621285112	-2.32339409487574	0.0201579910528539	0.0410460672733412
ANXA8L1	0	NA	NA	NA	NA	NA
ANXA8L2	1.10384571448625	-1.07989607536839	0.381112583885945	-2.83353560346244	0.00460361794112904	0.0113574582355211
ANXA9	47.4818957227425	0.357234649282298	0.0832371690465962	4.29176836951672	1.77255801197282e-05	8.62205028962635e-05
AOAH	126.692628198669	-0.542448724490007	0.138050185697531	-3.92935889038583	8.51726402089971e-05	0.000347665441460955
AOC2	18.5941533934484	-0.099493563829819	0.120276061730538	-0.827210023327174	0.408118031440507	0.530016299225047
AOC3	57.5347656111888	-0.690003033251422	0.173853000654117	-3.96888768474117	7.22089041630585e-05	0.000300779712796371
AOX1	15.4066528712418	-1.57108310461016	0.253211340134449	-6.20463168741161	5.482514888474e-10	8.36213232989647e-09
AOX2P	0	NA	NA	NA	NA	NA
AP1AR	412.700792391409	0.0354486955988758	0.057916191168754	0.612068834008554	0.540492216540287	0.665662029145396
AP1B1	3675.34778542012	-0.184130268661854	0.0400779664619411	-4.59430168036863	4.34200841911462e-06	2.50221820100348e-05
AP1G1	2129.73952402098	0.0308338032090551	0.0403496433369174	0.764165446311246	0.444768655128179	0.568452669189729
AP1G2	330.196140825248	0.0218669308329867	0.109332949431791	0.200003118425235	0.841478142247745	0.932938963028627
AP1M1	1654.5156834981	-0.214711870221728	0.0384192206997098	-5.58865761229117	2.28831627693088e-08	2.30860911819735e-07
AP1M2	0.885475614819216	-1.83899828212915	0.448099151648602	-4.10399858014301	4.06069954869324e-05	0.000179567145218994
AP1S1	1350.79867116725	-0.0846479642318351	0.0751179428992128	-1.12686744291452	0.259798530316577	0.365897434920085
AP1S2	800.343009007299	-0.518150752461866	0.0777658581463122	-6.66295936048174	2.68367890527594e-11	5.74776855238502e-10
AP1S3	20.5895985919112	-0.538758755657459	0.131675502353235	-4.09156408009878	4.28473511160518e-05	0.000188376397041246
AP2A1	2663.8501791883	-0.343341024675689	0.0651783121570051	-5.26771886710767	1.38129427713242e-07	1.16503407412738e-06
AP2A2	2632.43172091761	-0.117490583361849	0.0563111799219698	-2.08645216677497	0.0369376837766173	0.0694309266439673
AP2B1	12142.9896784216	0.190732629263338	0.0482557506671562	3.95253677802912	7.7327039558101e-05	0.00031926277356882
AP2M1	8200.61328174034	-0.224409540689531	0.0546838521062593	-4.10376248281609	4.06484787637182e-05	0.000179648441336908
AP2S1	841.262193800143	-0.608296198226288	0.0823631930930881	-7.38553442845256	1.51842238637769e-13	5.78076554183948e-12
AP3B1	857.412183137452	0.0544743925724131	0.0535299255666787	1.0176437197649	0.308847302350743	0.422485982986516
AP3B2	1386.34506625809	0.145414520308088	0.111334757423735	1.30610173923178	0.191517961601813	0.284067595473508
AP3D1	4084.13026900298	0.140403658825232	0.0352258734884495	3.98581056822537	6.72501502960812e-05	0.000282129697771412
AP3M1	1360.89357612605	0.137441950394735	0.0531016656447892	2.58827945839062	0.0096456691173089	0.0216061200751395
AP3M2	1042.41502456594	-0.233740210396769	0.0771077132719216	-3.03134667698523	0.00243465534235042	0.00652977871599738
AP3S1	628.359145256118	-0.363772540915111	0.0533395168859186	-6.81994442681473	9.10757353982056e-12	2.20175590325162e-10
AP3S2	2142.19687730339	0.111836162112202	0.0400925534529226	2.78944972271527	0.00527976933986397	0.0127859334102282
AP4B1	312.184575820191	-0.337796139341404	0.0572634011175126	-5.89898840706648	3.65736930083459e-09	4.49387053863665e-08
AP4E1	253.016256905029	-0.0327443732740051	0.0463597118594927	-0.706310974780149	0.479994769922198	0.605140437075456
AP4M1	345.122926789892	-0.0965698359807892	0.0612670665716501	-1.57621119117648	0.114977140260462	0.183606464588996
AP4S1	140.521594169295	-0.0975079244335719	0.0771175338072853	-1.26440667406769	0.206084098614245	0.302081739214757
APAF1	565.069155957126	0.179567869092557	0.063508888649806	2.82744467601553	0.00469211222046707	0.0115452226900551
APBA1	1283.84807945099	-0.164563950235727	0.117788334212923	-1.397115863259	0.162378732242895	0.247042533163751
APBA2	3781.81417468986	0.0447925763775115	0.0717626380222436	0.624176836470637	0.532511457318143	0.658026425438175
APBA3	250.320811064805	0.212374208196579	0.0716825551945738	2.96270421192596	0.00304949452838634	0.0079450365946503
APBB1	5194.1393840309	0.0409822110743316	0.079884866783408	0.513015953139745	0.607940161364832	0.730642592180531
APBB1IP	348.579092530332	-0.85163846698147	0.158168412854944	-5.3843776491739	7.26957321956064e-08	6.49993278161363e-07
APBB2	2488.88602706599	0.35990811405471	0.0770181659260006	4.67302888516602	2.96790007128202e-06	1.78480060256823e-05
APBB3	556.929931685677	0.162489889095855	0.0865109215382035	1.87825867771041	0.0603457865027757	0.106069936468571
APC	4299.54881061558	0.118056946800772	0.0802221455746962	1.47162539664121	0.141122063544837	0.218869343140108
APC2	10276.9670182219	0.603127930823222	0.0826253600866991	7.29954980154226	2.88732181408261e-13	1.02837576214287e-11
APCDD1	2869.30188739453	0.269460239425375	0.102279585591462	2.63454567074301	0.00842499687962333	0.0192187646229786
APCDD1L	1.24970169077822	-2.15845175630809	0.541702378853747	-3.98457130809618	6.76020553064718e-05	0.000283483033310313
APCS	0.0189822465237817	-0.0612280404553895	2.90048782817136	-0.0211095664186914	0.983158253697651	0.999052814291159
APEH	1590.99144158708	0.124840345029085	0.0503597958524143	2.47896844925553	0.0131762960838396	0.0282955325628978
APEX1	3334.26119091175	0.197488285581276	0.0551219063553727	3.58275499958334	0.0003399894569888	0.00116132039882787
APEX2	313.725910261756	-0.119436719831758	0.049617735307863	-2.40713767145335	0.016078107568229	0.0336635921153567
APH1A	3332.07154256963	-0.0327613580872492	0.0460985661331652	-0.710680631423789	0.477282164633035	0.602404037329694
APH1B	910.827305916417	0.185499906383379	0.0547936647393814	3.38542616679654	0.000710678251724518	0.00221972180044447
API5	2043.99575820736	0.067198645278668	0.0399837670182819	1.68064818024631	0.0928312714856155	0.153292075694314
APIP	299.837009681645	-0.206857633620552	0.0540088348766675	-3.83007028559168	0.000128106662713895	0.000497806481190822
APITD1	122.437169735882	-0.808762406803562	0.0800149108449207	-10.1076461657384	5.10971562493024e-24	2.53389487656797e-21
APLF	27.9884984719447	0.00444329723415601	0.0969235347948759	0.0458433263248145	0.963435125678995	0.999052814291159
APLN	1099.75118686473	-0.386696906411559	0.131204791418638	-2.9472773229578	0.00320585552299442	0.00829115349220542
APLNR	3050.47009969747	0.0249336076683132	0.229580691537463	0.108604985468669	0.913515806315836	0.985087142173685
APLP1	7691.21054133683	-0.667776973731355	0.13470510986914	-4.95732473979695	7.1470463174434e-07	4.98823081123621e-06
APLP2	12080.3151573966	-0.0551150010761234	0.0573810750899325	-0.960508338154043	0.336799436520635	0.45315855727766
APOA1	3.27531974164177	0.0784731548625121	0.23681894366919	0.331363503470949	0.740369929122555	0.850939230357771
APOA1BP	1563.57030526829	-0.176600487183311	0.0804076306509707	-2.19631502325804	0.0280694031655364	0.0547240178650679
APOA2	0.0908772952411299	0.23859357090755	2.20356840087339	0.108275999425742	0.913776760355832	0.985195815881469
APOA4	0.0141237080256319	-0.0909740797051773	2.90048782817136	-0.0313650961819525	0.974978376659546	0.999052814291159
APOA5	0.225300886563697	0.167032018621168	0.594107052542024	0.281148015170806	0.778596874940138	0.883429953730846
APOB	4.4402660081481	-1.68659102290468	0.276200896791153	-6.10639227641604	1.01908361537427e-09	1.44388843379769e-08
APOB48R	107.316920935644	-0.588003174281959	0.139020177993669	-4.22962466864873	2.3408152857075e-05	0.000110234884000358
APOBEC1	0	NA	NA	NA	NA	NA
APOBEC2	2.26005307401714	0.252204778291764	0.144958957195807	1.73983576572707	0.0818878603260415	0.137737973448047
APOBEC3A	2.9469725812716	-0.732742439395756	0.306243655193351	-2.39267794440714	0.016725915328912	0.0348539168689966
APOBEC3B	24.7796888698655	-0.641100998617925	0.212808046061205	-3.01257875575597	0.00259038211888477	0.00689959925344049
APOBEC3C	57.3125117526036	-0.684508252857929	0.142757313274483	-4.79490848599685	1.62749110200197e-06	1.04605111042599e-05
APOBEC3D	7.45713961372196	-0.829284726479798	0.15872819949626	-5.22455826445218	1.7457135388372e-07	1.42999152228342e-06
APOBEC3F	23.7671509025803	-0.938804667668446	0.13294836893523	-7.06142298087022	1.64806083918021e-12	4.80022539604596e-11
APOBEC3G	54.1821277047274	-1.05877544862851	0.136896310551681	-7.73414158761281	1.04103124033943e-14	5.3122807884339e-13
APOBEC3H	1.34204571461067	-0.83043399561246	0.306274415899644	-2.71140504234792	0.0066998728146695	0.0157442940748126
APOBEC4	0.127759328642867	-0.514778869128165	2.70862883842981	-0.190051461397931	0.849268804961583	0.939046291690413
APOC1	1717.85986440572	-0.349301125198585	0.154755393670909	-2.25711761582528	0.0240007264238491	0.047690747871904
APOC1P1	1.34014851581437	0.468310249869124	0.311198528031484	1.50486010596344	0.132360046788454	0.207140581395752
APOC2	342.405897384039	-1.10178910794544	0.18139501860445	-6.07397665284293	1.24780877917977e-09	1.73242080325462e-08
APOC3	0.109637483936297	-0.137506192466537	2.90048782817136	-0.0474079536314512	0.962188090068365	0.999052814291159
APOC4	1.71273090928534	-0.148179315299107	0.26228571690866	-0.564953810850136	0.572105181336001	0.697504520395781
APOD	6090.96073754796	-0.17497900521639	0.167848410291527	-1.04248235007099	0.297188104277075	0.409199625282545
APOE	43484.8098287631	0.0807662742521839	0.146747695343958	0.550375077870067	0.582062138815093	0.706407377418033
APOF	0.0859487401659064	0.0922227083129474	1.35620676242749	0.0680004781482411	0.945785253659887	0.999052814291159
APOH	0.639976601700998	-2.36419104273687	0.793201547004486	-2.98056786659734	0.00287714477728814	0.00756443447427305
APOL1	198.774081613086	-1.00178718989459	0.14520163157322	-6.89928328656157	5.22655538394497e-12	1.33882888907941e-10
APOL2	996.058676008476	-0.318399559366175	0.0914326154182719	-3.48234115265772	0.000497050016012827	0.00161923227092997
APOL3	217.6511843854	-0.270853916858469	0.0968008085402158	-2.79805428222166	0.00514114716973777	0.0124955408352965
APOL4	107.610429152036	-1.77843872510904	0.23322469694227	-7.6254305329819	2.4322126099034e-14	1.13346968374775e-12
APOL5	0.255837842130556	-0.38401036655149	0.567907057449576	-0.676185234034684	0.498923046341769	0.623934525499184
APOL6	518.986161289975	-0.238496615425066	0.119320701267932	-1.99878657174103	0.0456314513153111	0.0833659803927939
APOLD1	2127.38106772566	0.0153720925222181	0.131986001944724	0.116467597288507	0.907281964918129	0.980927616363854
APOM	88.5662847396599	0.088531138652131	0.0942268642210163	0.939553060414644	0.347446863181868	0.465258660498289
APOO	423.784206822295	-0.349996974531712	0.0640774440955003	-5.46209324470059	4.7055279162564e-08	4.40275326078369e-07
APOOL	169.02078698536	0.313987435208516	0.127745875845392	2.45790663010152	0.0139749502352414	0.0297759479949322
APP	33491.3120164759	0.109268794180824	0.0640412568452293	1.70622501124389	0.0879661936992165	0.1464482661586
APPBP2	1591.83554296047	0.0426745378756201	0.046896127846747	0.909979988434809	0.362833063500578	0.482812126606659
APPL1	1698.44764940917	0.221843784975568	0.0540419063306016	4.10503255785311	4.04257940901547e-05	0.000178827735064865
APPL2	1886.93903648787	0.127609710665586	0.0604044530828989	2.11258780028112	0.0346360638098874	0.0657009258879333
APRT	705.610699764393	-0.0242872320922866	0.0765400285420353	-0.317314123797957	0.751005261470615	0.859129407124198
APTX	489.893869084809	0.11085773515117	0.0458362069493164	2.4185625846779	0.0155819648509309	0.0327118544918606
AQP1	6457.70202216758	-1.8445900257569	0.235277919744343	-7.84004732684336	4.50376652328776e-15	2.51016843113502e-13
AQP10	0.0592147280642826	-0.289768441388818	2.26287888052249	-0.128053005347733	0.898107026077158	0.974221206143488
AQP11	89.500663096741	0.12693028660474	0.0663139842170817	1.91408023666966	0.0556099043489316	0.0988870494766768
AQP12A	0.0516967831209027	0.0589392920376494	2.06212981538775	0.0285817563946947	0.97719816242833	0.999052814291159
AQP12B	1.06160487953612	-0.137227110393627	0.50713631451374	-0.270592159280105	0.786704726917806	0.889810481232257
AQP2	0.137636137476029	-0.396969849290931	1.27251211264202	-0.311957619379146	0.755072731964701	0.862303314803503
AQP3	35.3216846411862	-1.09442631503531	0.223350424034201	-4.90004135773535	9.58164833834771e-07	6.50663900504371e-06
AQP4	22625.1617857554	-0.114944879332502	0.192613330098026	-0.596764924182575	0.550664339257997	0.67579467740654
AQP5	13.1646442464845	-3.83358459553093	0.414339988594	-9.25226794676423	2.19778946392359e-20	4.94247072468397e-18
AQP6	174.542595466696	0.385152383295746	0.152925816107138	2.51855699122712	0.0117836811970966	0.0256668987894862
AQP7	2.28987912345863	0.00151019741519755	0.213147377908906	0.00708522633500551	0.994346854595935	0.999853135554607
AQP7P1	7.18155756543713	-0.951058155744765	0.320281095383977	-2.96944830479165	0.00298335004383624	0.00780018789344232
AQP7P3	0.833134210748753	-1.2457308022869	0.520376722478756	-2.39390185701044	0.0166702087236652	0.0347490662551935
AQP8	1.13053100979858	-0.429328529123839	0.288665466395988	-1.48728746283385	0.136938904320085	0.213255965560236
AQP9	21.929445400094	-1.21178277054577	0.278652925298128	-4.34871720528073	1.36936152971965e-05	6.88060586770018e-05
AQPEP	4.61537364732367	0.454284115542214	0.18717862909475	2.4270084557156	0.0152239010270772	0.0320520624715517
AQR	752.167406316155	0.11941896844483	0.0734396701192457	1.62608258249155	0.103932088728503	0.168500846341625
AR	46.9551439114225	-0.808116879640228	0.239016143189778	-3.38101380457213	0.000722189145391656	0.00225276420514107
ARAF	742.540869022594	0.024496668017559	0.0623940496892918	0.392612246513039	0.694605893036196	0.8103337113122
ARAP1	2326.28638645854	0.0635854977087911	0.0509148925414017	1.24885852714088	0.211716822812659	0.309003347158466
ARAP2	1291.32561328695	-0.290205456232711	0.134366447464563	-2.159805976185	0.0307876928193875	0.0593298105945551
ARAP3	235.432757617872	-0.609938505487944	0.124634230580593	-4.89382814533872	9.88932035580106e-07	6.68272032429045e-06
ARC	944.343356767057	-1.08343783547446	0.211930606485726	-5.11222920294634	3.18379196796733e-07	2.43666547924369e-06
ARCN1	2714.24447547118	-0.068431418118683	0.0463743108475608	-1.47563202272972	0.140042703670226	0.21736965401141
AREG	1.81110280632879	-1.44685898584021	0.493136308476397	-2.93399403161056	0.00334630642983527	0.00861293137516824
ARF1	6432.41524114014	-0.204943594684136	0.0442366629851064	-4.63289002502599	3.60596117395498e-06	2.12231555399542e-05
ARF3	9241.81989418893	0.0380461435309944	0.0625862610627761	0.607899287877779	0.543254271914965	0.668312296853598
ARF4	2571.83545188192	-0.13207062562417	0.0476753198195647	-2.77020953659071	0.00560202410309733	0.0134688147879043
ARF5	2501.50885078636	-0.240231017669199	0.0604704952898431	-3.97269803261474	7.10631129813143e-05	0.000296453970029901
ARF6	1089.15462673961	-0.127556481020357	0.0448165928291184	-2.84618872092126	0.00442459640212499	0.010980584424111
ARFGAP1	2212.8866270734	0.111564210606801	0.0616963338994734	1.80827941557405	0.0705630239211716	0.121305678456485
ARFGAP2	3097.499810541	0.160593626850195	0.0501449506429489	3.2025881926514	0.00136198589484883	0.00392034636201465
ARFGAP3	877.245765264573	0.00257709566367234	0.0367699359667165	0.0700870315902939	0.944124388610462	0.999052814291159
ARFGEF1	1125.38343679677	0.163737496064856	0.0480559693881456	3.40722491190129	0.000656270245349437	0.00207051656526233
ARFGEF2	1165.68242920768	0.00787624757018799	0.0773030660802394	0.101887906516057	0.918845649206834	0.988679444023676
ARFIP1	556.632732277773	-0.0492508308826588	0.0462450744131915	-1.06499625111664	0.286877626234611	0.397123562477802
ARFIP2	1116.07820991836	0.0494518188249456	0.0445821579333981	1.10922891841221	0.267331440331826	0.374353055971147
ARFRP1	816.665059826471	-0.0273460194674387	0.0687160344696363	-0.39795689140825	0.690661962581743	0.806947523490056
ARG1	1.17731150481892	-0.831685562873532	0.403221353661626	-2.06260297308426	0.0391503650549808	0.0730411148527153
ARG2	177.316878206904	-0.295073918900828	0.0949840269286573	-3.10656358171104	0.00189275600129901	0.00523315240387746
ARGFX	0.00482307842005707	0.0244755411835537	2.90048782817136	0.0084384223046316	0.993267193029493	0.999052814291159
ARGFXP2	0.342898951194551	0.762218638699592	0.423314999873707	1.80059444840602	0.0717668248393113	0.123112505977673
ARGLU1	2350.43127697459	0.321376829203348	0.0884963011723553	3.63152837967131	0.000281747666692196	0.00098945254746782
ARHGAP1	2826.1702350511	0.0434006200216921	0.0554714069003076	0.782396237032371	0.433981744586709	0.557666943786552
ARHGAP10	180.918752160071	0.331706062422633	0.10348833942444	3.20525060376315	0.00134944933638449	0.00388831200322944
ARHGAP11A	151.596129285079	-0.524941774875707	0.175300955973615	-2.99451746831728	0.00274879315506987	0.0072684795760256
ARHGAP11B	11.0960900531272	-0.342483225571197	0.216085081786803	-1.58494618295355	0.112978562276495	0.180937843195381
ARHGAP12	1670.2249852	0.212923167635151	0.080756720238601	2.63659998828649	0.0083741516350574	0.0191188870997533
ARHGAP15	26.4775915072104	-1.0510291551931	0.185093398341249	-5.67837191716236	1.35982798312352e-08	1.44818684986833e-07
ARHGAP17	772.59356358174	-0.100204054165269	0.0508847226921218	-1.96923651862178	0.0489259371395366	0.0885208173028051
ARHGAP18	198.104477279953	-0.810722199719073	0.137950957454021	-5.87688708133312	4.18053161314157e-09	5.06905839486884e-08
ARHGAP19	497.089825308252	0.0633098165000043	0.0629472817773966	1.00575933880497	0.314531351216749	0.428714943444353
ARHGAP20	192.902280922325	-0.1500171136831	0.162779615607125	-0.921596436529083	0.356739117934598	0.475917721347622
ARHGAP21	5239.78992609492	-0.083910585429901	0.0752432452572217	-1.11519094030367	0.264768607550328	0.371301926620502
ARHGAP22	377.358147174069	0.0278700837980279	0.119284923311512	0.233642970329496	0.815262165363574	0.912399182809532
ARHGAP23	2023.66126283172	-0.380699646934758	0.10229982675021	-3.72141047574138	0.000198113101697359	0.000725252202692962
ARHGAP24	464.247885865684	0.0111745264133089	0.110170143234483	0.101429716665842	0.919209347624038	0.988679444023676
ARHGAP25	155.925695403005	-0.670943757698654	0.107616593667194	-6.23457530883721	4.53005363088208e-10	7.14610417791676e-09
ARHGAP26	993.989415257584	-0.223155123405089	0.13293408563254	-1.67869002403146	0.0932124711894178	0.153764004845048
ARHGAP27	232.534574738737	-0.372151627640032	0.0813456085216209	-4.57494429513202	4.76346711205747e-06	2.71276366157808e-05
ARHGAP28	67.5064280273255	-0.405413106411366	0.173823775205387	-2.33232252568635	0.019683730383526	0.0402201104719909
ARHGAP29	339.780513337612	-0.293901804272155	0.108348498951379	-2.71255999959945	0.00667656932748046	0.0157028883367958
ARHGAP30	233.29978726106	-0.609620038386889	0.112068387633455	-5.43971454627142	5.33660079130918e-08	4.92178632827466e-07
ARHGAP31	3132.21134680403	0.550508729202758	0.108141133374505	5.09065063426219	3.56836963551018e-07	2.69789948204718e-06
ARHGAP32	2195.36040769537	0.0476042188399473	0.0967357727425439	0.492105634661574	0.622644669150157	0.745031733054756
ARHGAP33	1369.71659251209	0.0248703031688896	0.0759033010600701	0.327657727945285	0.743170468602031	0.853177950585732
ARHGAP36	283.061207879997	-0.0652412205929493	0.240279595699039	-0.271522100755766	0.785989503987401	0.889303835773219
ARHGAP39	591.351532568669	-0.182472838401104	0.0671038138867472	-2.71926180990351	0.00654277984717323	0.0154332677453751
ARHGAP4	324.718774617487	-0.628331150663993	0.115852688507717	-5.42353534266183	5.84316554686839e-08	5.34058703574833e-07
ARHGAP42	255.72759224263	0.151685395081219	0.127592098952722	1.18883062765058	0.234506323151419	0.336126309178718
ARHGAP5	3033.35372937292	-0.110350644592917	0.0775617339277823	-1.42274597284873	0.154809808335188	0.236962540023944
ARHGAP6	137.640548680098	-0.806926002478503	0.148417964767239	-5.43684859002068	5.42311840570566e-08	4.98730908066321e-07
ARHGAP8	7.83034921542505	-0.415590238079798	0.160487592873136	-2.58954745746806	0.00961021753132888	0.0215391826464133
ARHGAP9	85.1436048699725	-0.820403503818044	0.126212868120035	-6.50015736143321	8.02360375802885e-11	1.52732772323108e-09
ARHGDIA	5065.05586128526	-0.128910235647334	0.0617965717336333	-2.08604186334132	0.0369748311228588	0.0694872445744912
ARHGDIB	981.356333118928	-0.773818071303602	0.113055373018792	-6.84459349999206	7.66933330595238e-12	1.89607043028164e-10
ARHGDIG	561.747794654456	-0.486089441491408	0.197065297578045	-2.46664150139828	0.0136386829138233	0.029165427637477
ARHGEF1	967.687409141343	-0.420653035225499	0.0889886619770206	-4.72704079238908	2.27815511650933e-06	1.41624943597848e-05
ARHGEF10	755.015461048565	-0.232542375545703	0.0786485240061281	-2.95672904843813	0.00310921206148001	0.00807576702511729
ARHGEF10L	1686.06176799112	-0.257693421249406	0.0962299589094777	-2.6778918350346	0.00740871392717668	0.0171887862201405
ARHGEF11	1853.85071693799	0.248486242485965	0.0700042153920187	3.5495897081977	0.000385831980575181	0.00129615954565294
ARHGEF12	4260.21707378863	0.024605588443146	0.0668181166574625	0.368247260982894	0.71268887323791	0.826590873068736
ARHGEF15	93.6663987037392	-0.281306930791496	0.121669643232761	-2.31205519566898	0.0207746417932889	0.042106641404549
ARHGEF16	19.8457630810033	-0.984042976076298	0.203076062660234	-4.84568670076441	1.26174493506366e-06	8.30570015116789e-06
ARHGEF17	2742.00304838181	0.370887874510382	0.0858881088406786	4.31826802937732	1.57258386263444e-05	7.76852411324395e-05
ARHGEF18	1283.47516574118	0.0561682500255268	0.0315032323846669	1.78293609175371	0.0745967071086596	0.127267141450377
ARHGEF19	30.7402210955554	-0.618701169095743	0.150382588682256	-4.11418086706167	3.88556698610507e-05	0.000173109572705073
ARHGEF2	3116.41434337057	0.100122856727098	0.0684429784133187	1.4628652792178	0.143504246325112	0.22192324675577
ARHGEF3	835.801384009178	-0.367630521022054	0.105876028424366	-3.47227343614116	0.000516070408247161	0.0016746311569631
ARHGEF33	20.4704199058142	-0.365518031534286	0.143724935945753	-2.54317755738814	0.0109849392076077	0.0241790937735337
ARHGEF35	6.97611265513469	-0.357858483209589	0.129813052115013	-2.75672189644328	0.00583839840393554	0.0139676676313846
ARHGEF37	635.327108878494	-0.586501246468287	0.129072816897859	-4.54395635397351	5.52080938532678e-06	3.08145608981876e-05
ARHGEF38	0	NA	NA	NA	NA	NA
ARHGEF4	2985.80507923795	-0.181408252514809	0.115578767790698	-1.569563821993	0.116516620683487	0.185804043866972
ARHGEF5	9.16794191643404	-0.791886497210212	0.15222766649725	-5.20198801854798	1.97167940072536e-07	1.59334428675278e-06
ARHGEF6	3224.23452907425	0.02801070212163	0.102771495556037	0.272553220813615	0.785196675205009	0.888661088094538
ARHGEF7	3008.56734568369	0.0156518434832568	0.0707284707027253	0.221294809964748	0.824862890863751	0.919578528320553
ARHGEF9	2776.58257592705	0.066357527449871	0.0895004207428626	0.741421402258188	0.458437971627296	0.582765240651499
ARID1A	2218.00006320024	-0.253131079886027	0.0684035426685732	-3.70055511762732	0.000215128344939818	0.000779427162071203
ARID1B	1624.6523397641	0.285896536126569	0.0577636832325236	4.94941665987109	7.44362424032511e-07	5.17840621611106e-06
ARID2	707.740204088295	0.188798408105121	0.0698102779739477	2.70445002633535	0.00684175599599438	0.0160426237830421
ARID3A	44.1468344169193	0.197408289122411	0.0992338417057957	1.98932426407191	0.0466654231522699	0.0849900446148318
ARID3B	77.5473039484916	-0.0638135496415193	0.0761963253886996	-0.837488544440795	0.402318013451944	0.523996927750057
ARID3C	0.8216178696995	-0.100914182014066	0.337013922624758	-0.299436240580561	0.764607213912552	0.870877710074721
ARID4A	801.434027073503	0.333886238725338	0.0668311045878959	4.99597067539431	5.85405564325208e-07	4.20726258418785e-06
ARID4B	1054.47623306027	0.106238289675419	0.0491279152598781	2.16248316488573	0.0305809533607007	0.0589843061729283
ARID5A	439.941931435719	-0.478084074738511	0.121131886884647	-3.9468061386164	7.92006339195987e-05	0.000326388293203716
ARID5B	1354.42614218562	-0.170467395325406	0.102670894212993	-1.66032833971201	0.0968484175337705	0.158840603383915
ARIH1	1239.17543888784	-0.0660037938770221	0.0568257560559959	-1.16151193504548	0.245433772399123	0.349252384533812
ARIH2	1669.04154824777	0.0785559681770888	0.0352734844144532	2.22705438606742	0.0259436392180186	0.0510375325477043
ARL1	1232.47909230924	-0.298933617882458	0.0495973653257969	-6.02720761312243	1.66816660743085e-09	2.26085088911792e-08
ARL10	162.546099848048	0.766610064389155	0.111708561312974	6.86259007706082	6.76230701766501e-12	1.69408054043577e-10
ARL11	23.7369244289749	-0.808614667320592	0.140547879816003	-5.75330391592661	8.75159457961696e-09	9.70503664964404e-08
ARL13A	0.32372304527303	0.990852521204764	0.391263794189166	2.53244112008409	0.0113271391689333	0.0248487830679638
ARL13B	235.267881830678	-0.143261179598393	0.0667154437219846	-2.14734657533551	0.0317657004723633	0.0609049912893335
ARL14	0.0260873368731218	-0.0314820012056005	2.90048782817136	-0.01085403665543	0.991339901771768	0.999052814291159
ARL15	214.026549892492	-0.0379261140364089	0.0835857998658966	-0.453738722333899	0.650016892921889	0.770475870317095
ARL16	610.128780848095	-0.0320377273749723	0.0597448933196832	-0.536242105305046	0.591791237077067	0.71510418775823
ARL17A	76.2608221706662	0.360909544223734	0.0868003381217271	4.15792786103669	3.21147397477403e-05	0.000145969228371633
ARL17B	2.09728611578791	0.389362914691672	0.189143042764064	2.05856323870902	0.0395360973939197	0.0736950082568908
ARL2	1504.65682444223	-0.313669075957143	0.0748668730475474	-4.18969115696784	2.7933438158764e-05	0.000128810847398783
ARL2BP	1806.33525753137	-0.152824989483919	0.0526837400229021	-2.90079993215146	0.00372211439514129	0.00945066199317744
ARL3	1700.5953370508	0.109020816126705	0.0604170760316479	1.80447024727906	0.0711576193059876	0.122219214687194
ARL4A	878.489906662299	0.417568240461653	0.141897490412377	2.94274577547589	0.00325315444325297	0.00839663778626884
ARL4C	996.264718894014	-0.414182360513707	0.147542030511421	-2.80721607990643	0.0049971709227651	0.0121888366308837
ARL4D	224.707402972535	0.145053814717418	0.127852153787185	1.13454338015194	0.256566687943185	0.362189762395708
ARL5A	866.744440690344	-0.0716071374406765	0.0467427750023643	-1.53194022898843	0.125537185052443	0.198114170454039
ARL5B	191.224523299409	0.351840354888903	0.126856108696774	2.77353892140828	0.00554502068743818	0.0133450348550341
ARL5C	0.769225044906588	-0.033044600330758	0.300037092311469	-0.110135050557197	0.912302270904913	0.984429276309826
ARL6	90.3403124587751	-0.213189785462793	0.0966518412370711	-2.20574986191803	0.0274015185966623	0.0535460613983479
ARL6IP1	8573.70827019899	-0.0829417574805807	0.0528614911777531	-1.56903930692532	0.116638780372984	0.185968179094271
ARL6IP4	1808.45983320844	-0.120207740184375	0.0766954183213252	-1.56733925983361	0.117035413301434	0.186523683003686
ARL6IP5	2852.35906251093	-0.306715403847092	0.0624583951807359	-4.91071541238851	9.07447074294771e-07	6.1904855085929e-06
ARL6IP6	510.347148620067	0.152187157232519	0.0662359018660769	2.29765358279907	0.0215815133709279	0.0434687011657723
ARL8A	2916.97041192639	-0.0275347867504309	0.0586682515335719	-0.469330277120576	0.6388335767902	0.760497437838389
ARL8B	2645.09312287922	-0.173545898062063	0.0562710001915759	-3.08410899879551	0.00204162780384398	0.00559437258803381
ARL9	3.21194619803555	-2.16770238436399	0.429913348983087	-5.04218440644248	4.60247425937833e-07	3.3903252989584e-06
ARMC1	816.118484424402	0.100334195801693	0.050375523463655	1.991725125677	0.0464012253608991	0.0845885284644913
ARMC10	529.189848313962	-0.29597392775176	0.0424113154883311	-6.97865473739416	2.98019859495183e-12	8.15233957940148e-11
ARMC2	36.2215901101548	-0.708878638304861	0.127511399355891	-5.5593354153878	2.7080382710821e-08	2.68857598371293e-07
ARMC3	14.7879080912612	-1.27640344274212	0.283161985983176	-4.50767937055631	6.55405173951908e-06	3.57661852828158e-05
ARMC4	22.1906292642449	-0.932355551195341	0.192754169068292	-4.83701886035477	1.31800926409867e-06	8.63157510459877e-06
ARMC5	721.225171438717	0.303919579893949	0.0772448062427842	3.93449857248286	8.3370564276207e-05	0.000341243283562949
ARMC6	951.037630461516	0.0140026924028094	0.0595947637305905	0.234965146705024	0.814235784868595	0.911725340398254
ARMC7	272.034576464199	-0.0833907517262805	0.0521940763826476	-1.5977052858436	0.110108581838704	0.177059946184463
ARMC8	902.882707673025	0.139744837386539	0.0431135388372362	3.24132143070205	0.00118976947893949	0.00348269134594972
ARMC9	193.603441888439	-0.303850638758695	0.0879632732534387	-3.45428981346845	0.000551744109532796	0.0017790760811614
ARMCX1	925.752036311073	0.186234559480443	0.0511846540937953	3.63848428357394	0.00027424736073271	0.000965406617504663
ARMCX2	760.488023482403	-0.470353115544122	0.101362735665886	-4.64029618433454	3.4791016661909e-06	2.05726552166804e-05
ARMCX3	2586.06944457128	0.000799730541669078	0.0468656412188052	0.0170643251830337	0.986385299145977	0.999052814291159
ARMCX5	228.214738330958	0.115407089043236	0.0638689945107473	1.80693449031543	0.0707724940384232	0.121611731204185
ARMCX6	270.051660064441	0.119488984531424	0.0665295822097448	1.79602788057072	0.0724900830145357	0.12414400119553
ARMS2	0.50635619142709	0.624147362053561	0.380797173909184	1.63905460654079	0.101201887660929	0.164736593516437
ARNT	769.542859665273	0.0165330312650731	0.0567812174622382	0.291170778014195	0.770920710543761	0.876552361184996
ARNT2	8678.26972624537	0.0512682569397092	0.0723271253708995	0.708838581331711	0.478424652654953	0.603591504664689
ARNTL	356.518626323826	-0.266839989133405	0.0946442144008858	-2.81940096204029	0.00481133757375952	0.0118070382789632
ARNTL2	36.6423120101098	-0.657558754055515	0.157581977565273	-4.17280430297396	3.00873355100581e-05	0.000137725223376219
ARPC1A	2045.61583504916	-0.249734118057743	0.0435826204550097	-5.73013085148342	1.0035319148198e-08	1.101493032498e-07
ARPC1B	705.36062673602	-0.869174784110567	0.117884400124881	-7.37311114269405	1.66691404569482e-13	6.25982866868696e-12
ARPC2	2629.88432326208	-0.22320453252108	0.0395097515889534	-5.6493529709634	1.61052864454659e-08	1.68456592674587e-07
ARPC3	2106.28792885162	-0.287368568997382	0.0464287758761169	-6.18944961556062	6.03746465438215e-10	9.09381358378122e-09
ARPC4	2646.33692501872	-0.162292804843331	0.0473468608328987	-3.42774160711755	0.000608624456094976	0.00194124441835988
ARPC5	1800.99649404459	-0.420309045843384	0.0597674537601033	-7.03240675988031	2.03000962538147e-12	5.73144323428872e-11
ARPC5L	673.470233103753	-0.264813128003078	0.0687044259211698	-3.85438236987701	0.000116022148817644	0.000457279062183255
ARPM1	13.7325923511207	-1.07708468528596	0.188438338877644	-5.71584684783987	1.0915901987409e-08	1.18803345209055e-07
ARPP19	6772.46526245216	-0.0742923297235688	0.0615138401715211	-1.20773356884267	0.227149761389014	0.327548194546938
ARPP21	1050.49127864857	0.262704259402369	0.143721761113201	1.82786696577877	0.0675695199187466	0.116918181553955
ARR3	0	0	0	0	1	NA
ARRB1	572.251867936359	-0.0255136691545865	0.135955570412803	-0.187661815379239	0.851141765301517	0.940148579554949
ARRB2	1260.71571784512	-0.162590669807683	0.0574326328024386	-2.83098060935105	0.00464055342695724	0.0114285372822301
ARRDC1	376.574356475411	-0.0680956961833404	0.0557248565760422	-1.2219985903493	0.221708160062976	0.320993847553373
ARRDC2	1030.3039440231	-0.331489775757108	0.145274397125173	-2.2818182853754	0.0225000707695796	0.045084062234114
ARRDC3	1053.79514483311	-0.129246139268225	0.0849326508939825	-1.52174856086332	0.128072094819897	0.201588208172606
ARRDC4	1016.30868137896	-0.272322876170244	0.105767843294078	-2.57472278614091	0.0100320455546396	0.0223499321537529
ARRDC5	2.0094124757771	-0.149636730507913	0.197327885063738	-0.758315179122199	0.448262322384732	0.57193517053178
ARSA	406.5693451131	-0.299229292835862	0.105880840331084	-2.82609480525643	0.00471193159017665	0.0115851458115963
ARSB	544.449388931563	0.111566523904094	0.060503227434685	1.84397640645754	0.065186578679893	0.113301737365789
ARSD	316.689225648304	-0.52922627818027	0.147203476357222	-3.59520230959754	0.000324139587478818	0.00111426584106654
ARSE	50.5784575262832	-0.55527918493539	0.148713726767334	-3.73387983077134	0.000188552484269557	0.000694988573617922
ARSF	61.2825574232699	-0.883589852840123	0.283397015016117	-3.11785165694096	0.00182174471782303	0.00506214696015768
ARSG	122.369119046851	-0.0471740715899689	0.0978003379954229	-0.482350803247497	0.629556763260916	0.751489186610673
ARSH	0.0154110432596731	-0.0326601799090749	2.90048782817136	-0.0112602368442504	0.991015820726465	0.999052814291159
ARSI	32.5111807707935	-1.03488102446215	0.1725187392148	-5.99865863367823	1.98954102342906e-09	2.6264657606224e-08
ARSJ	57.9080433677736	-0.232118493157259	0.192204481091071	-1.20766431583495	0.227176409195973	0.327562197409239
ARSK	137.182622819187	-0.0593342905308315	0.0677212261391039	-0.87615499472728	0.380945779119624	0.502071284950855
ART1	0.828866576651674	0.996058593692511	0.358628264472695	2.77741241381812	0.00547936054655003	0.0132133208192366
ART3	37.5531167504414	-0.838934923780819	0.228340196944854	-3.67405710867205	0.000238729338509438	0.0008538978004018
ART4	0.224245881739362	-0.00791162072722372	0.75732500023859	-0.0104467972465338	0.991664813378323	0.999052814291159
ART5	2.08980015258555	-0.248387885298605	0.271697627695933	-0.914207044813012	0.360608063112985	0.480280968294548
ARTN	7.85426359618354	-1.03595882457813	0.176118140642222	-5.88218124947528	4.04894588683908e-09	4.91875712634848e-08
ARV1	438.756460381402	-0.0656863041725907	0.0515167631612081	-1.27504719128107	0.202292539210461	0.297222343563801
ARVCF	1119.44953970929	0.109088530544043	0.07531977971392	1.44833841732389	0.147522428456083	0.227264916866389
ARX	95.4030388999176	-0.98957144171942	0.23194101761827	-4.26647883104516	1.98582327977014e-05	9.5560642524893e-05
AS3MT	310.820289097769	0.317954821483281	0.0968094582120266	3.28433633815938	0.00102222849813254	0.00306035590617389
ASAH1	3958.88750488851	-0.172779841072343	0.0626708289711428	-2.75694200808961	0.00583446980697313	0.0139599958019127
ASAH2	4.73873013993429	0.315197617323936	0.191436637170725	1.64648534357005	0.0996638751429264	0.162726833707404
ASAH2B	11.6554101213091	0.390888527472297	0.197478909696113	1.97939378981689	0.0477716871613228	0.0867515896431909
ASAM	14.1989167262804	-1.14123894660766	0.241858733970492	-4.71861788024947	2.37452361237008e-06	1.46860526585345e-05
ASAP1	1673.06158996338	-0.0892918466380625	0.0689567272647389	-1.2948968168871	0.195355826724527	0.28882146286244
ASAP1IT1	0.00984755433328476	0.0542215804333417	2.90048782817136	0.0186939520678927	0.985085252963837	0.999052814291159
ASAP2	862.415500215496	-0.139213026280564	0.0674823160958326	-2.06295566504957	0.0391168406238307	0.0729888304946913
ASAP3	768.141149033458	-0.807748345149516	0.108885682262927	-7.41831550634031	1.18619262286367e-13	4.61588839561033e-12
ASB1	1340.98844928534	0.409764689815772	0.0673721304600522	6.08210972426853	1.18611348340558e-09	1.65508187366983e-08
ASB10	0.0150588074634583	-0.0909740797051776	2.90048782817136	-0.0313650961819526	0.974978376659546	0.999052814291159
ASB11	0.0243665366563643	-0.0314820012056007	2.90048782817136	-0.01085403665543	0.991339901771768	0.999052814291159
ASB12	2.25900705489592	0.661890794306586	0.203698586416657	3.2493637091458	0.00115663488574273	0.00340217774756874
ASB13	1020.10704207951	0.288473472448483	0.0700371498858287	4.11886367333249	3.80745305297833e-05	0.000169942631074546
ASB14	17.2874625986423	0.714155772213272	0.09162805069807	7.7940736136201	6.48827154012672e-15	3.4378951119466e-13
ASB15	0	NA	NA	NA	NA	NA
ASB16	15.5451587792857	0.455974946144014	0.125956842374034	3.62008873475868	0.000294502002231244	0.00102735727329586
ASB17	0	NA	NA	NA	NA	NA
ASB18	0.0109825744125221	-0.0624062191588631	2.90048782817136	-0.0215157666075115	0.982834226440392	0.999052814291159
ASB2	28.2516917173115	-0.831038655492828	0.287860980786106	-2.88694443138276	0.00389002926640171	0.00981771708367599
ASB3	815.306423297281	-0.0217628803949445	0.0628398295992494	-0.346323033237577	0.729099960402132	0.841336194100637
ASB4	6.98168525730004	0.167790706272981	0.203461008702523	0.824682367117843	0.409551945024196	0.531521582121054
ASB5	8.19309674722408	-1.69860089459233	0.284955124891107	-5.96094172807538	2.50788394538515e-09	3.22489863721734e-08
ASB6	906.282484185421	-0.171755748522616	0.0414230155433216	-4.14638447418169	3.3776647811408e-05	0.000152804764601785
ASB7	353.113774110251	0.0210903758309068	0.0413377704371026	0.510196258963624	0.609913972834698	0.732563422843315
ASB8	908.315936097948	0.0471012356066947	0.0275438916176558	1.71004287486023	0.0872579449938541	0.145517690452801
ASB9	8.19328220525811	-0.529961196001826	0.153637847175636	-3.44941826343079	0.000561795779008228	0.00180633921297076
ASCC1	947.125321256451	0.0910401710275897	0.0574386710466305	1.58499786587473	0.112966819152579	0.180934019247278
ASCC2	1011.65276383618	0.0898814672796734	0.0624762661603018	1.43864979141127	0.150249771475493	0.230896351238461
ASCC3	1048.29237755868	0.431897039268708	0.0749732118741624	5.76068476289396	8.37733712994304e-09	9.3328168256393e-08
ASCL1	1701.19510653929	0.185496220447828	0.140777183483085	1.31765827287003	0.187618068884038	0.279032101831535
ASCL2	6.08086886291693	-1.39031616705779	0.182659269586917	-7.61152812119516	2.70873947399509e-14	1.24139861201576e-12
ASCL3	0.0349884968392449	0.0863256113356358	2.66685215062227	0.0323698527177418	0.974177103929897	0.999052814291159
ASCL4	0.341258785517045	-0.256778695729432	0.506352633941374	-0.507114367571676	0.612074574511417	0.734611038292838
ASF1A	895.63168860708	0.237541765187908	0.0566815995036317	4.19080913855806	2.77961411089869e-05	0.000128218937760754
ASF1B	94.1908567666443	-1.03161112320169	0.21098308703965	-4.88954416999225	1.01069743232968e-06	6.81313640336562e-06
ASFMR1	0.497325922665761	-0.168170735072179	0.378893785040942	-0.443846644394041	0.657153462315084	0.776907798256673
ASGR1	138.345178240277	0.48023745016487	0.109911980229484	4.36929121977592	1.24650447118667e-05	6.32740064901582e-05
ASGR2	4.14520678584342	-1.47032732889321	0.245864066431522	-5.98024489805925	2.22802396182981e-09	2.90168238530563e-08
ASH1L	2828.90326291918	0.233093185994618	0.07613595970181	3.06153868562947	0.00220202534917273	0.00598400158934039
ASH2L	1084.16627207618	-0.0646740916720823	0.0393662265840047	-1.64288267594234	0.100407210041261	0.163654758289099
ASIP	4.31393224959178	-0.506389519017567	0.287999070528598	-1.75830261565821	0.0786960328819071	0.133284987821708
ASL	306.905903698551	-0.188076945319592	0.0721433291167982	-2.60699010736115	0.00913419992266049	0.0206180469776207
ASMT	0.523929825098244	0.0528538761721943	0.460218128185065	0.114845272133523	0.908567764457884	0.981933532529504
ASMTL	1071.50517838762	-0.102152111676953	0.0766815261002496	-1.33216065031628	0.182807403904354	0.273222194088888
ASNA1	1897.16944932169	-0.00560500191607483	0.0398607912863996	-0.140614416703445	0.888174558520463	0.967026738827099
ASNS	940.945548402674	-0.304775176369854	0.0860330237893255	-3.54253707409118	0.000396297712633227	0.00132808833171489
ASNSD1	1133.03964562474	0.0664779517521017	0.0329100092470549	2.01999188918644	0.0433842288537876	0.0798563801306036
ASPA	162.560648464238	-0.531754690955778	0.18720145679455	-2.84054782511318	0.00450361194951607	0.011143789035778
ASPDH	104.785415938385	0.105175124422813	0.188224426988851	0.55877510748933	0.576315212966666	0.701311031194571
ASPG	2.21536535112042	0.790878782704321	0.400482968948313	1.9748125239413	0.0482894272596767	0.0875520317992076
ASPH	2757.2726156992	-0.146059232946157	0.0640465067321735	-2.28051833579216	0.0225769645714437	0.04522408024979
ASPHD1	853.914577794379	0.193526514530943	0.150126695166518	1.28908795545181	0.197367510379208	0.291287565544612
ASPHD2	228.525504588917	-0.511671372517318	0.125148235218935	-4.0885224759438	4.34129489692547e-05	0.000190646329033921
ASPM	105.820424318843	-1.18146190535915	0.263555953515149	-4.48277449096305	7.36787783204474e-06	3.9670032648036e-05
ASPN	21.2489228631362	-1.51048694376382	0.206684208516928	-7.3081874740329	2.70769845645076e-13	9.6796466077186e-12
ASPRV1	120.266778139015	-0.0853916372177054	0.0827354630602636	-1.03210442123841	0.302023202906387	0.414758892495671
ASPSCR1	570.42750824362	0.0409863590243343	0.0789500959229467	0.519142612117102	0.603661294770426	0.726632815140353
ASRGL1	1337.15482449412	-0.047553871937905	0.0786989967607702	-0.604250039965053	0.545677416573346	0.670653357684831
ASS1	329.358338213766	-1.1308528996092	0.190983673448672	-5.92120194982597	3.19597103628854e-09	3.98774708656905e-08
ASTE1	155.470249165716	0.00925613307453263	0.0502723565032047	0.184119737334027	0.853919523018524	0.94160462826719
ASTL	0.248551349578201	-0.0353015308769869	0.565952121320656	-0.0623754723184186	0.950263827171075	0.999052814291159
ASTN1	5300.89862531021	0.459242128215942	0.0923617593438798	4.97221070146682	6.61937057244347e-07	4.67551902761093e-06
ASTN2	2131.42272862625	0.418276362567273	0.0982817501895404	4.25589045535524	2.08218641807225e-05	9.94553848493882e-05
ASXL1	1669.58452280716	0.16029455174792	0.0461923849849194	3.4701510173214	0.000520165811675419	0.00168650574984118
ASXL2	445.557071475341	0.405976417567985	0.13463506503563	3.01538397489945	0.00256654112803889	0.00684269443290214
ASXL3	152.402238521388	0.0565146188891179	0.141401460965034	0.399674929123207	0.68939596013682	0.80591032021681
ASZ1	0	0	0	0	1	NA
ATAD1	1308.49949223639	0.260410833562553	0.0569114700514912	4.57571792341586	4.74589648574106e-06	2.70434997154485e-05
ATAD2	495.886513943506	-0.182958964413881	0.0951020261753477	-1.92381773314213	0.0543774338504564	0.0970165655597625
ATAD2B	288.155144406566	0.24936096083614	0.0704615296981421	3.53896604153223	0.000401697524132967	0.00134501906453109
ATAD3A	559.138829651646	-0.467515129807524	0.0752155944267622	-6.21566755365798	5.11069053198793e-10	7.92628347142315e-09
ATAD3B	239.990164722114	-0.133748486985631	0.109480267064224	-1.22166752577586	0.221833381551935	0.321151104065755
ATAD3C	27.2453758092893	-1.05614653291233	0.184762422529274	-5.7162409891275	1.08906261267938e-08	1.18594993970829e-07
ATAD5	64.5088394666447	-0.0439639577837335	0.132589983667722	-0.331578272864937	0.740207728004101	0.85080336738377
ATCAY	7499.05891036573	0.924046653286396	0.15531290704673	5.94958056517718	2.68830493460499e-09	3.4318031310403e-08
ATE1	265.884443304836	0.342467544632838	0.112313988705974	3.04919759843435	0.00229453506701136	0.00620300645736647
ATF1	206.499410837349	-0.0309920010093045	0.0586031491196679	-0.528845317612858	0.596912757856605	0.719943419828297
ATF2	583.311998068416	0.229995560457185	0.0975043027702004	2.35882472796346	0.0183329122987704	0.0377672053534533
ATF3	398.696502906441	-0.906419148434182	0.206185381011618	-4.39613683563292	1.10194482488364e-05	5.6731277902524e-05
ATF4	4662.54712439364	0.0429528565784596	0.0597201387505561	0.7192357130627	0.471995698405555	0.597030890440654
ATF5	399.851904898247	-0.402432525085788	0.104757293158247	-3.84157048118714	0.000122249621691025	0.000478798639834836
ATF6	1063.88507515858	0.0812623261926435	0.0654305146419661	1.24196373263008	0.214249943474393	0.312230842907199
ATF6B	1834.57455224897	0.192378200387245	0.0407327442412587	4.72293738049652	2.32462442350053e-06	1.44190727487454e-05
ATF7	1156.10061670672	0.0449614665155762	0.0639089919610484	0.703523324902067	0.481729676026977	0.606868937881822
ATF7IP	1149.90319895012	0.280628527106633	0.11747311288672	2.38887452805686	0.016900072986193	0.0351902897882185
ATF7IP2	27.1454013498362	-1.02193001808521	0.155431434458121	-6.5747962865295	4.87198240976371e-11	9.80480122839024e-10
ATG10	65.3592440836413	-0.158114020009455	0.065100811953931	-2.42875649725145	0.0151507040642567	0.0319188035514951
ATG12	648.371226494757	0.112284232739417	0.0375301655348253	2.99183952799848	0.00277301985928988	0.00732306485447811
ATG16L1	477.356519328831	-0.100948482396882	0.0586265631490969	-1.72188982219806	0.0850894790269147	0.142404856730749
ATG16L2	416.879773801834	0.283468080286447	0.087026175182181	3.25727379944061	0.00112487872800863	0.00332241212579215
ATG2A	1119.58720116593	0.174147191054961	0.0436867869929737	3.98626685645181	6.71210181287634e-05	0.000281649054157146
ATG2B	995.354560229476	0.166473872281326	0.0702077685388724	2.37116028248574	0.0177323394323029	0.036705923645589
ATG3	869.054965469669	-0.0189818479106866	0.0429604133552169	-0.441845094779134	0.658601304021286	0.778138506919889
ATG4A	160.834805788238	-0.295612924635776	0.0633094871029896	-4.6693305879241	3.02182773100375e-06	1.81304083929152e-05
ATG4B	1372.99550386067	0.0178373791381841	0.0568337017342216	0.313852143954994	0.753633338667295	0.86107684261013
ATG4C	217.797870767422	-0.680638219358377	0.0854781432238268	-7.96271647567388	1.68302807281569e-15	1.05971080124099e-13
ATG4D	361.176656223525	-0.0711638900930459	0.061352642864484	-1.15991564129084	0.246083153822262	0.349970453336462
ATG5	555.460391469829	-0.0108642348863428	0.0355017864990247	-0.306019385436878	0.759589885940227	0.866440191639525
ATG7	729.538063185653	-0.12881893743342	0.0470984648484325	-2.73509843363201	0.00623616245122314	0.0147911922745469
ATG9A	2357.35569451829	0.0167766917529373	0.044300627368921	0.378700997013576	0.704909912904533	0.819879583568298
ATG9B	25.6667548153751	-0.765452195226121	0.190384129290011	-4.02056725043563	5.80581718866409e-05	0.000247649987712315
ATHL1	271.682041414033	0.339936956047056	0.1582558187655	2.14802184651907	0.0317120199971853	0.0608080970400123
ATIC	1297.00379358464	-0.0849451566549657	0.0696792384708997	-1.21908847626745	0.222810613226762	0.322372803157446
ATL1	1024.38517818713	-0.271239844825258	0.118244452221805	-2.29389066234127	0.0217967799149495	0.0438205115238054
ATL2	463.977154475218	-0.15229594543171	0.0638442632910396	-2.38542881664176	0.0170592234530256	0.0354758474818834
ATL3	161.502429309232	-0.293368505559412	0.132240539072852	-2.21844608027342	0.0265244321657219	0.0520319016213674
ATM	1545.31509103968	0.365405411484036	0.0705498932486671	5.17938999845247	2.22612634568095e-07	1.77393009993694e-06
ATMIN	1867.74553132043	-0.074364955782977	0.0427207838664695	-1.74072076990479	0.0817325357674011	0.137560459641592
ATN1	9191.67990275564	0.0997023568643854	0.0521794728500059	1.91075822385151	0.0560356586244701	0.0995434589691606
ATOH1	0.034715337526646	-0.205245521890434	2.90048782817136	-0.0707624144797164	0.943586845704815	0.999052814291159
ATOH7	15.5234980064057	-0.792265912202224	0.209482449712938	-3.78201569290362	0.00015556355242807	0.000591147173367522
ATOH8	2611.53242802843	0.651480158188994	0.154261109244854	4.22323008941236	2.40825737440394e-05	0.000112883416434736
ATOX1	717.346337556947	-0.266449141933058	0.0724921519009022	-3.67555845627673	0.000237329688671538	0.00084999188498288
ATP10A	545.354293741028	0.0225031392375826	0.127139377899685	0.176995826228896	0.859511668007654	0.946232531047941
ATP10B	254.870089689842	-0.215617447528779	0.181678112747005	-1.18681025616463	0.235302472421556	0.337022000864025
ATP10D	427.791887356833	0.182167867948602	0.094630152700099	1.92505097741866	0.0542229810387381	0.096780200711571
ATP11A	1141.55053133695	-0.0569069196760727	0.0847484079457541	-0.671480692740539	0.501914355052743	0.626744810609507
ATP11B	517.503845512062	-0.0256878139521401	0.0683023191980385	-0.376089922769092	0.706850045777114	0.821395174267222
ATP11C	249.286730269373	-0.0100650485288375	0.096730200403364	-0.104052803435394	0.91712744487022	0.98770713797695
ATP12A	1.0567540049702	-0.446532715375039	0.369584559948107	-1.20820175885523	0.226969665408048	0.327410556350537
ATP13A1	1791.55175691008	0.230149540388114	0.0613419839232285	3.75190898090537	0.000175493181382636	0.000655093249940202
ATP13A2	1865.7723526552	-0.507444974297169	0.0909530211654071	-5.57919866536736	2.41629144275145e-08	2.4200453911348e-07
ATP13A3	1131.70771922964	-0.0803900577979641	0.0781750979052996	-1.02833331779575	0.303793063659885	0.416810290237101
ATP13A4	624.2328569169	0.105645010939234	0.144255168403461	0.732348186262278	0.463956075258138	0.58854194513265
ATP13A5	32.8399332451234	0.005479362210091	0.197258239551302	0.0277776087962397	0.977839524662794	0.999052814291159
ATP1A1	8085.07174140288	-0.540775881627659	0.113655942696956	-4.75800797385091	1.95512777425579e-06	1.23528817883394e-05
ATP1A2	22793.6772618473	-0.128101734093741	0.170118606496124	-0.753014245368037	0.45144135376028	0.575159985670948
ATP1A3	7811.71768153385	-0.330208995815608	0.151823068802585	-2.17495930242971	0.0296331662852063	0.0573978547264171
ATP1A4	3.98203613299188	0.480228998979982	0.229051048835362	2.09660248849226	0.0360287788181095	0.0679602635660038
ATP1B1	4605.25869044745	-0.798826573151926	0.1765485777927	-4.52468427182626	6.04857330491345e-06	3.33084873909528e-05
ATP1B2	13982.8142686139	0.103445889666677	0.0971562134552922	1.06473776599248	0.286994614767473	0.397228644500316
ATP1B3	1620.76339004536	-0.126699257389882	0.0594599942594454	-2.13083198153446	0.0331029865864268	0.0631808704807553
ATP1B4	0.847376183624897	-1.24728128858757	0.503614085230768	-2.47666085037324	0.0132617852696594	0.0284629919770826
ATP2A1	13.3688458313986	-0.266373619128515	0.157530790390965	-1.69093050614055	0.0908500760949385	0.150676654804572
ATP2A2	9655.1197144659	0.162912407218536	0.0623122104907749	2.61445398799733	0.00893701971060428	0.0202201639217462
ATP2A3	59.0212331783421	-1.15776789219634	0.157086345258364	-7.37026436188411	1.70290010151808e-13	6.38257518669762e-12
ATP2B1	2074.65806608117	-0.486546652564399	0.157207578296333	-3.09493128662837	0.00196858497493901	0.0054164793591294
ATP2B2	2883.50300008759	-0.279790661192029	0.169810738029189	-1.64766177003445	0.0994220971796459	0.162416361129114
ATP2B3	504.386790487085	-0.59864677016533	0.254866981751771	-2.34885965239854	0.0188310032641909	0.0386656336266538
ATP2B4	4890.7679810067	-0.136764392576427	0.0750822163555596	-1.82152844195175	0.0685265672778444	0.118351831680078
ATP2C1	2742.15722094772	0.061139951625397	0.0524088927116257	1.16659498917127	0.243373967879249	0.34675501243441
ATP2C2	56.3339234482224	0.202401651729521	0.176245396747868	1.14840815966996	0.250800106787692	0.355502350137347
ATP4A	1.11359979364217	-1.03395246039485	0.594043042412134	-1.74053458516482	0.0817651926522206	0.137577650510734
ATP4B	0.13997963076401	-0.483852175758465	1.03588392793616	-0.467091111957366	0.64043469290596	0.761929237655856
ATP5A1	10267.8247722408	0.0173705489972367	0.0545181858734826	0.318619350936357	0.75001517773841	0.858402978900512
ATP5B	12003.236355481	-0.070593337100791	0.0555107015543941	-1.27170680831006	0.203477310684278	0.298781503958237
ATP5C1	2426.40350267169	-0.10243404537424	0.0516850075189928	-1.9818908865709	0.0474914541589434	0.0863156398302759
ATP5D	1496.62810933226	-0.0167363017537289	0.0958899912774434	-0.174536482178885	0.8614438621156	0.947809280494085
ATP5E	2990.47057346139	-0.200552640514808	0.071196539841744	-2.81688746335984	0.00484915133275867	0.0118922884574629
ATP5EP2	28.5288432043425	-0.31782533058461	0.108975673533912	-2.91647961676243	0.00354005853259154	0.00903705544090819
ATP5F1	2165.11838917391	-0.534923791179362	0.0509592397111419	-10.497091287302	8.90828760965016e-26	6.62639547579362e-23
ATP5G1	969.206604803577	-0.166406207475784	0.0640454738785515	-2.59825085830949	0.00937000131096664	0.0210607713833808
ATP5G2	4760.19453243697	0.128861907208248	0.0671060658615724	1.9202721177854	0.0548235363383875	0.0976863085299811
ATP5G3	2004.45867575292	-0.330355503304079	0.0849046971462021	-3.89089784673775	9.98739760953191e-05	0.000400572936060446
ATP5H	1620.01391919134	-0.230250878091229	0.0568661987838856	-4.04899365555054	5.14383390551369e-05	0.00022200791727881
ATP5I	1355.87815252949	-0.0781171713786603	0.0754215813212858	-1.03574030151783	0.300323315172484	0.41275248119925
ATP5J	1632.75277625791	-0.0842535749298786	0.0464795961554259	-1.81270023620984	0.0698780680466136	0.12030996492669
ATP5J2	1398.36614194994	-0.279937523515859	0.0616746032926148	-4.53894323710032	5.65368513577351e-06	3.14744589884455e-05
ATP5L	2142.93323992245	-0.148652325941043	0.0576680443136369	-2.57772441757472	0.009945327858453	0.0221771752314633
ATP5L2	0.203114737614	0.134929451376213	0.692898186267136	0.19473200255166	0.845602757068529	0.93611661830025
ATP5O	2902.66077392061	-0.0847813245300154	0.0545123019714483	-1.55526957152573	0.119881881068462	0.190291823692059
ATP5S	203.733806272081	0.15529799676687	0.0561118157920426	2.76765231306048	0.00564616552532395	0.0135597716701559
ATP5SL	551.094470010609	-0.466009538932505	0.0513665102866471	-9.07224447080349	1.1659015737292e-19	2.14747966056407e-17
ATP6AP1	4251.51376028912	-0.0627271878397003	0.0502073238177444	-1.24936330140606	0.211532224728271	0.308803836522098
ATP6AP1L	73.0086463418066	0.204316135530222	0.0761215233355825	2.68407838647017	0.00727300517996133	0.0169234464053092
ATP6AP2	3627.57303889099	-0.13472741822517	0.0451146886971382	-2.98633155001058	0.0028234634330859	0.0074374533908855
ATP6V0A1	5049.64223619133	0.0532969847915883	0.0774542829055193	0.688108943653914	0.491384178799229	0.61686161352571
ATP6V0A2	561.340120243242	0.0844869963391461	0.0529275101683697	1.59627755151114	0.110426839740895	0.177483177976308
ATP6V0A4	15.85689389709	0.705163915967894	0.427054239305085	1.65122799650779	0.0986920284695261	0.16138529048792
ATP6V0B	1735.6885292237	-0.623881195620564	0.0715394727239064	-8.72079667162659	2.76251123941732e-18	3.40897966271574e-16
ATP6V0C	4234.12714269761	-0.0974528994611698	0.0762881298283958	-1.27743201570654	0.201449767750452	0.296231638404329
ATP6V0D1	2819.74025315008	-0.174715571781832	0.059471794949265	-2.93778877753531	0.00330562153916498	0.00852409607566009
ATP6V0D2	2.79798002655136	0.0562726221959577	0.504147175892339	0.111619433544094	0.911125162573711	0.983817801584254
ATP6V0E1	2049.49578497582	-0.116950740009547	0.0698238791857041	-1.67493902334621	0.0939461960938853	0.154810659098357
ATP6V0E2	7792.95920572108	0.0539050754244062	0.0767591991064587	0.702262087826689	0.482515731887786	0.607661278551135
ATP6V1A	3162.97858696226	-0.133900224989249	0.091965484486064	-1.45598346746643	0.145397189928328	0.224419924438457
ATP6V1B1	67.3025063080262	0.577626605599649	0.185907887822053	3.10705808326186	0.00188959268085841	0.00522590053593616
ATP6V1B2	4609.84373503853	-0.226008765686153	0.0976377082036671	-2.31476926122345	0.0206255630107664	0.0418527319933083
ATP6V1C1	2348.52949274629	-0.168536498843979	0.0862185733851515	-1.954758612058	0.0506115683716681	0.0911639873622111
ATP6V1C2	28.5597679245244	-0.04649050096592	0.0758576321510048	-0.612865174507087	0.539965492077107	0.665085869044367
ATP6V1D	1573.77766488383	-0.2579025935139	0.0722011813969901	-3.57199963385434	0.000354265906943898	0.0012028621208383
ATP6V1E1	3106.5560299456	-0.286634175685052	0.0814409481561611	-3.51953387300253	0.000432305829505774	0.00143508320333705
ATP6V1E2	82.4087183296993	0.0626901978098317	0.0665124705573545	0.942532990949017	0.345919828701335	0.463463074962509
ATP6V1F	2138.75244166044	-0.273314098194446	0.0547338769115104	-4.99350883980537	5.92920706002684e-07	4.24864262841494e-06
ATP6V1G1	1638.67086381972	-0.0376949045632121	0.0400238588842466	-0.941810850178887	0.346289489111316	0.463894072134991
ATP6V1G2	3124.0406682233	0.075444303384873	0.131974609296121	0.571657713459056	0.567553887756831	0.692610562166653
ATP6V1G3	0.0145645044237069	-0.0909740797051773	2.90048782817136	-0.0313650961819525	0.974978376659546	0.999052814291159
ATP6V1H	1700.66527611949	-0.249887716436612	0.0862968760313256	-2.89567511512124	0.00378343871352857	0.00958057516613001
ATP7A	208.281580467835	0.0217612208288274	0.0728983707169332	0.298514501967773	0.765310509424545	0.871524774908479
ATP7B	198.964114682622	0.214764717703289	0.0936447962654438	2.2933972443543	0.0218251451437428	0.0438680427229251
ATP8A1	2869.40988603262	0.0717531251282643	0.111180314071512	0.645376168681375	0.518683443176625	0.64385993523979
ATP8A2	176.980830170163	0.0592058034155597	0.249319783188119	0.2374693362014	0.81229270507667	0.910551261588292
ATP8B1	39.2655293052188	-0.754544090059499	0.158202889536082	-4.76947097661833	1.84710352014223e-06	1.1754847673429e-05
ATP8B2	712.503542496634	0.00452474633639551	0.0611945300409787	0.0739403723399058	0.941057831271337	0.999052814291159
ATP8B3	20.5770249270138	-0.397778325987919	0.147623624583493	-2.69454382460947	0.00704850568022318	0.016477468857188
ATP8B4	94.2342404009186	-0.712088992920567	0.157826249322322	-4.51185399119696	6.42634213406351e-06	3.515854508424e-05
ATP8B5P	24.780892140714	-0.442176657951726	0.09518048569429	-4.64566507227072	3.38982589456365e-06	2.0091704811787e-05
ATP9A	9739.87451057423	0.268205375045055	0.0910367942236578	2.94612060246907	0.00321786908047968	0.008316662837963
ATP9B	469.619746709045	-0.0683481564797208	0.052952143296441	-1.29075335245806	0.196789217822836	0.290614767218169
ATPAF1	1682.93723476106	-0.518114513954685	0.0760460025371217	-6.81317224665122	9.54697168212968e-12	2.29079940859042e-10
ATPAF2	312.192594116535	-0.0642484761518733	0.0464308333477212	-1.38374591881036	0.166436267880023	0.252322444210994
ATPBD4	125.922330059784	-0.185904772603679	0.0745328952507326	-2.49426474012965	0.0126218365730041	0.0272440088528905
ATPIF1	1240.41345305831	-0.455863777626454	0.0668361007674469	-6.82062197513005	9.06471843593183e-12	2.19780971663803e-10
ATR	422.825209656033	-0.0809232134160337	0.0538832273537476	-1.50182565874843	0.133142139875016	0.208179237220698
ATRIP	219.022127913671	0.189564392042922	0.0726800557088383	2.60820372513652	0.00910187659334981	0.0205546816108577
ATRN	2892.4501552553	0.138024123009049	0.0525883770264084	2.62461271508222	0.0086747575045231	0.0197109132900959
ATRNL1	1157.01641786161	-0.0582549507051156	0.154582152404136	-0.376854312086529	0.706281876023519	0.82103092398238
ATRX	2310.84615319703	0.512022841878073	0.10421682603584	4.91305349965262	8.96687960341572e-07	6.12356820374506e-06
ATXN1	1422.18045020585	0.0730477229897789	0.0796221733322987	0.917429403552177	0.35891767072067	0.47832605786506
ATXN10	3277.81538331399	0.0228332359767818	0.0413261626475675	0.552512851761856	0.580597031720654	0.705367585493903
ATXN1L	1198.18539252063	0.197382326638884	0.0566032294561989	3.48712129210973	0.000488249869156281	0.00159559859234243
ATXN2	1074.6084107544	-0.0726027218322492	0.0419731409295161	-1.72974240727346	0.0836763083510214	0.140379927438303
ATXN2L	2642.19237126501	0.172125478798514	0.0462046587393116	3.72528406214734	0.000195095400575444	0.000715830970808023
ATXN3	273.127742063135	0.0918433150630697	0.0517547980894497	1.77458551580732	0.0759663505557525	0.129239023552802
ATXN3L	0.00533052704784615	-0.0338383586125489	2.90048782817136	-0.0116664370330706	0.990691741163476	0.999052814291159
ATXN7	459.516499408502	0.263926778504035	0.0558247346234315	4.72777488839608	2.26993641868667e-06	1.4120479362303e-05
ATXN7L1	194.713331089401	0.143718019022909	0.0803274861231582	1.78915121036603	0.0735904666979996	0.125782824687327
ATXN7L2	219.961336034784	-0.199363329208935	0.0975316300264076	-2.04408897046995	0.0409447585592238	0.0759661963291814
ATXN7L3	1698.20452134081	-0.275031510260747	0.0931853017287577	-2.95144733298502	0.00316288480641303	0.00819755992442081
ATXN7L3B	4155.8770655686	0.0707836166061176	0.0518239008353313	1.36584887407512	0.171986402514219	0.259313715180869
ATXN8OS	0.0222752920377953	-0.119541940251492	2.90048782817136	-0.0412144257563935	0.96712495335399	0.999052814291159
AUH	182.518254882348	-0.286246810581439	0.0781885713648437	-3.66098018655122	0.000251252190436156	0.000893238485852069
AUP1	2042.45851158106	0.024291100009894	0.0505943774866838	0.480114613847898	0.631145897372082	0.75315446089445
AURKA	83.8753001800229	-0.553200477842792	0.144017580692919	-3.84120101991126	0.000122433796931049	0.000479288786508479
AURKAIP1	1130.51168114825	-0.378525150545962	0.0811109639651947	-4.6667568974817	3.05991003035489e-06	1.83215665594624e-05
AURKAPS1	3.37244328037057	-0.391490215334761	0.194463467115687	-2.01318129899362	0.0440955598725763	0.0809961181437578
AURKB	62.0546755392887	-1.20500242175179	0.285209309811689	-4.22497576445663	2.38966493883801e-05	0.000112142070333623
AURKC	13.9080913218254	-0.584703527080188	0.171359917386749	-3.41213707380909	0.000644556926881894	0.00203916861613879
AUTS2	1053.53748765273	-0.114407347299158	0.0726538871162987	-1.5746899696643	0.115328024175412	0.184090788011923
AVEN	133.142052001516	-0.105668251269346	0.0731625110656398	-1.44429503211751	0.148656002622884	0.228737933863201
AVIL	37.9962819311325	-0.777616085020171	0.149319412350344	-5.20773603900658	1.91158591927598e-07	1.54816045556103e-06
AVL9	327.852951072236	0.118139250522031	0.112578092951016	1.04939822149444	0.293994876427011	0.405495714598373
AVP	0.00485732299457655	-0.0338383586125489	2.90048782817136	-0.0116664370330706	0.990691741163476	0.999052814291159
AVPI1	214.084199670116	-0.204247503626003	0.10419175511308	-1.9603038974085	0.0499602807703986	0.0901622716526708
AVPR1A	6.62260367430349	0.214673522845161	0.237790397361908	0.902784659207394	0.366640194553427	0.486873205346284
AVPR1B	0.259164057540435	0.0539370848499287	0.754210045109239	0.0715146731334194	0.942988146986654	0.999052814291159
AVPR2	1.50410025324671	0.387178911784136	0.308867595972106	1.25354332028765	0.210008043862497	0.307006439201474
AWAT1	0.00512086088870505	-0.0338383586125489	2.90048782817136	-0.0116664370330706	0.990691741163476	0.999052814291159
AWAT2	0.19419041454614	-0.0697602703824109	0.715268729192002	-0.0975301555000386	0.922305387750517	0.990140782630863
AXIN1	873.645037804696	0.151517323896865	0.0526256298600571	2.87915459253946	0.00398742820776441	0.010030809253143
AXIN2	535.984063628027	0.0122242868678226	0.0842490847551288	0.145096969342192	0.884634311082962	0.964802455533222
AXL	1003.53306591669	-0.356461987851147	0.0956072037093552	-3.72840093655272	0.000192698629747906	0.000708515494168156
AZGP1	593.354819151909	0.362949651214654	0.26007892817705	1.39553655407091	0.162854099706831	0.247677072692289
AZI1	479.382467091295	0.147568718258599	0.0889813520716272	1.6584229709143	0.0972321232878006	0.159321296652212
AZI2	877.515477704869	0.0217376826904585	0.0355998918466557	0.61061091938403	0.541457192051232	0.666567924523923
AZIN1	5227.45529628901	0.0776069458604573	0.0467278757617668	1.66082760226725	0.0967480758512686	0.158716412500088
AZU1	2.88649453301116	0.853725000245789	0.287328266034239	2.97125309677696	0.00296587246785458	0.0077607865685709
B2M	17910.9696910014	-0.423454354510187	0.103933664042882	-4.07427524478953	4.61578653275853e-05	0.000201510861272122
B3GALNT1	684.038392026331	-0.226084149608951	0.113150877248342	-1.99807686079838	0.0457083279363043	0.0834670061644911
B3GALNT2	299.725434684004	-0.238040138001743	0.0801095315228169	-2.97143340469972	0.00296413151188107	0.00775728057371851
B3GALT1	37.2984592323548	-0.239111179514509	0.202953294204008	-1.17815865198106	0.238733363118534	0.341168854090448
B3GALT2	383.056150798323	-0.0615095304302156	0.141627839248463	-0.434303952927696	0.66406773372352	0.783285574834148
B3GALT4	120.834648724202	-0.10840694125332	0.104135420888763	-1.04101889950702	0.297866776855009	0.409929798930896
B3GALT5	8.72129345785146	-0.201566472332244	0.182895815757498	-1.10208356324292	0.27042534449968	0.377717246179249
B3GALT6	528.314042181094	-0.354485523478933	0.0756240913193397	-4.68746820351254	2.76605659859526e-06	1.68013613746333e-05
B3GALTL	458.253430862807	-0.571615360839275	0.102893766612587	-5.55539348648308	2.76987076963435e-08	2.74587766664613e-07
B3GAT1	4817.10655321959	0.116962958313694	0.103194403193989	1.13342346768382	0.257036463605816	0.362635535679722
B3GAT2	622.82482045859	-0.353249424694642	0.180550957438763	-1.95650817755676	0.050405320074337	0.0908601817725489
B3GAT3	1128.00682456081	-0.119020731586905	0.0705545151261896	-1.68693288266571	0.091616258355069	0.15172618912374
B3GNT1	4115.74180795247	-0.170493112359163	0.0797133142720266	-2.13882854973694	0.0324495563665894	0.0621053359851399
B3GNT2	218.327290300439	-0.59329151142379	0.0869089710891491	-6.82658537995124	8.69595501745295e-12	2.12348194491843e-10
B3GNT3	0.246284045861545	-0.850526017092802	1.18163916552329	-0.719784890268209	0.47165744941852	0.596784760991441
B3GNT4	21.2989296341159	-1.01016470052883	0.266725265552194	-3.78728538684744	0.000152302135394602	0.000580944115661085
B3GNT5	142.811358765288	-1.13986425216028	0.153368675803271	-7.43218422008421	1.06818887486401e-13	4.21607608976937e-12
B3GNT6	0.202042830203219	-0.506529703250537	0.542839727468792	-0.933110967416542	0.350762677039391	0.469111147562233
B3GNT7	44.9676570517353	-1.17151380594664	0.153609622256395	-7.62656524206033	2.4109094071618e-14	1.12625574721037e-12
B3GNT8	5.4324697340232	-1.09319178421164	0.185504353309328	-5.89307886693501	3.79065371603035e-09	4.63995208025487e-08
B3GNT9	429.665352715711	-0.173419997908259	0.129869928740163	-1.33533605192953	0.181766384156811	0.271918461447457
B3GNTL1	91.9377889839636	0.14442924976409	0.0862495168815483	1.67455140603794	0.0940222803550422	0.154901686861446
B4GALNT1	715.121367591897	-0.0946962342067176	0.113101838487967	-0.837265206938188	0.402443511815953	0.524089793180292
B4GALNT2	0.00607207714156729	-0.0338383586125489	2.90048782817136	-0.0116664370330706	0.990691741163476	0.999052814291159
B4GALNT3	39.3927203755733	-0.378679663065664	0.183474210311644	-2.0639394627858	0.0390234565161424	0.0728628740125695
B4GALNT4	2034.80897410262	0.307884432030098	0.113471187820392	2.71332695060382	0.00666113489986934	0.0156715036389043
B4GALT1	397.322688074593	-0.730356264344688	0.118611745610609	-6.15753743935593	7.38847802738306e-10	1.08912473360967e-08
B4GALT2	1227.24465803183	-0.400896847791485	0.064349900573183	-6.22995287048747	4.66575515144561e-10	7.31838642570625e-09
B4GALT3	695.127319171993	0.0727997538716835	0.0542800890725175	1.34118707459054	0.179859721851025	0.269462159779907
B4GALT4	482.715755781953	-0.124316600297802	0.0780353033676436	-1.59308152762752	0.111141902752506	0.178439681158349
B4GALT5	1943.92391830033	0.00351389413141646	0.0645120691539478	0.0544687866549608	0.956561676299449	0.999052814291159
B4GALT6	435.653432760813	-0.146504832286238	0.128248793240192	-1.14234862242996	0.253309138054853	0.358507042076901
B4GALT7	530.112409716806	0.0221641535564939	0.059713910343244	0.371172368868346	0.71050915192641	0.824557275622969
B9D1	187.890193637742	-0.247429645105442	0.065529759435344	-3.77583631067	0.000159471696097242	0.000604386165494935
B9D2	63.2523016562155	-0.906269068604085	0.109601119276808	-8.26879391911333	1.35320943089978e-16	1.13787262580877e-14
BAALC	13411.7453791741	0.466767379497141	0.106666666685929	4.37594418199546	1.20907954521141e-05	6.16168600906157e-05
BAAT	11.0865763170974	-0.735774968306108	0.17390200476141	-4.23097461881233	2.32680928957266e-05	0.000109677045236011
BACE1	3792.08585541595	-0.0653614201901958	0.0872964661198499	-0.748729279607501	0.45402039230728	0.577985412534413
BACE2	133.711525079736	-0.796691251692186	0.12575797469173	-6.33511515786664	2.37164069841e-10	4.03408365059361e-09
BACH1	609.990320546148	0.00550268506930989	0.0735635628482842	0.0748017749039495	0.940372429607123	0.999052814291159
BACH2	260.630661895983	0.432016207840673	0.0830819416229377	5.19988097776232	1.9941618232304e-07	1.60830232115412e-06
BAD	1206.256484725	-0.265959267092836	0.0793327022031738	-3.35245440665446	0.00080098433148613	0.00247065980397795
BAG1	1434.10773603987	0.089069825588772	0.0715111567043015	1.24553747546101	0.212934249038358	0.310545839408931
BAG2	147.670872369642	0.0554319346349074	0.0982919070990204	0.563952173387628	0.572786681458595	0.69811535287429
BAG3	1284.40138142735	-0.469378587770553	0.134236451118377	-3.49665522188626	0.00047113031188803	0.00154723386515784
BAG4	194.38670571583	0.0798729111177926	0.120370175121463	0.663560645626667	0.506971552324367	0.631876639940276
BAG5	1189.97183777328	0.0544303452669997	0.0454741740963323	1.19695071650328	0.231325764594387	0.332472016820242
BAGE	0.00470790267521062	-0.0338383586125489	2.90048782817136	-0.0116664370330706	0.990691741163476	0.999052814291159
BAGE2	5.13654516415441	0.685703652611524	0.202052564650192	3.39368942828647	0.000689578482570322	0.00216079842075665
BAHCC1	1101.47413957063	0.201530805066808	0.0867867368725947	2.3221382935812	0.0202254903151702	0.0411699436954366
BAHD1	840.061793560848	-0.0261141950481849	0.0508638400648445	-0.513413753560345	0.60766192685368	0.730416103413372
BAI1	3299.69109783574	-0.101421643672968	0.153815497553983	-0.659372074243513	0.509656870120142	0.634730517140561
BAI2	3502.64914863452	-0.38060998490615	0.0929860235851364	-4.09319562479914	4.254684690764e-05	0.000187140327312658
BAI3	1525.39533149376	0.541036788994503	0.114876399387084	4.70972969105203	2.48045537761671e-06	1.52534203507495e-05
BAIAP2	1492.63425436864	-0.591737795101546	0.11126313258631	-5.31836360658386	1.04704665722551e-07	9.04820480372713e-07
BAIAP2L1	13.1669082248742	-0.433389567782949	0.132677751047557	-3.26648261943786	0.00108892492080687	0.00322904139349967
BAIAP2L2	55.4020477648751	-0.0586487124198399	0.153546524154231	-0.38196053439106	0.702490638168027	0.817951170509913
BAIAP3	1393.36335856784	-0.963508870778114	0.180380056056882	-5.34154879336703	9.21558030790481e-08	8.04647057132637e-07
BAK1	212.058189043607	-0.145631400745436	0.0641758157667282	-2.26925671307069	0.023252719237764	0.0463711682881373
BAMBI	341.154350027691	0.112773350017045	0.117932426969016	0.956253957587706	0.338943945360741	0.45550523961342
BANF1	2483.56692400794	0.0686257915155794	0.0646778591471766	1.06103993577492	0.288671752461049	0.399253540657182
BANF2	0.0192685834574861	-0.119541940251492	2.90048782817136	-0.0412144257563935	0.96712495335399	0.999052814291159
BANK1	9.11412896138623	-1.88263520593539	0.24914080906822	-7.55651076584521	4.14025646826505e-14	1.80343603820374e-12
BANP	210.129559277492	0.00747720438242852	0.0530920464411873	0.140834736719207	0.888000500612428	0.966946099985606
BAP1	2909.14809311087	0.140643263414875	0.0550896897691264	2.55298702904832	0.0106803473596393	0.0235877489934252
BARD1	75.3508640474897	-0.14615103433076	0.157973430338684	-0.925162123892746	0.35488158214343	0.47382877450148
BARHL1	24.5175273925578	1.36499266743937	0.371816681318464	3.67114423860461	0.000241467014439749	0.000862254811533373
BARHL2	0.153938520701897	-0.890874937635004	1.54708463307329	-0.575841113401325	0.564722581265805	0.689939022216088
BARX1	1.38903721133787	-0.0887227501198658	0.557943931441676	-0.159017322566112	0.873655226051945	0.956180461126612
BARX2	13.0488456550123	-0.447019384280932	0.296592121291674	-1.5071856337051	0.13176308161916	0.206373339691817
BASE	0	NA	NA	NA	NA	NA
BASP1	3317.86809409574	-0.0831408020134099	0.122571974206095	-0.678301892026438	0.497580299295134	0.622776554242786
BAT1	5178.17168829602	0.17827213234078	0.0491791984891619	3.62494993447417	0.000289017436260708	0.00101059432603184
BAT2	8802.58082482204	0.0851417358430012	0.0458376665948154	1.85746226123629	0.0632454155591203	0.110384111263729
BAT2L1	7266.12048604526	0.125123853704672	0.0595505721641022	2.10113604550886	0.0356290255259213	0.0672981105255707
BAT2L2	3277.04109252007	0.128569543855559	0.0591033246476559	2.17533522220662	0.0296050049027133	0.0573535805688144
BAT3	4816.01451249676	0.140536931957903	0.0389513516437865	3.60801168706867	0.00030855259419797	0.00106994307410612
BAT4	614.35302215026	0.221986970927871	0.0578505490898675	3.83724916047084	0.000124420217744059	0.00048572608219017
BAT5	1156.08507122454	0.00386410068903776	0.0340949385134111	0.11333355792731	0.909766113245497	0.982700913996594
BATF	7.39849223675017	-1.23777417545769	0.247984859046599	-4.99132963285108	5.9965060443539e-07	4.28892111308448e-06
BATF2	95.9675807065484	-0.147734626692772	0.136222327007645	-1.08451110723194	0.278138244911602	0.386881016728307
BATF3	34.2771873717591	-1.20176523951587	0.164858489536077	-7.28967760712671	3.10697601183783e-13	1.09552088049443e-11
BAX	557.500030888745	-0.25090979651379	0.0906556906101607	-2.76772252050626	0.00564494946523091	0.0135585348556341
BAZ1A	506.340542066307	0.0288190823366811	0.106046636963349	0.271758569266475	0.785807663572476	0.88915985335196
BAZ1B	2362.67643273237	-0.0234887407298746	0.0510157152357866	-0.460421668525342	0.645213584381843	0.766111905816849
BAZ2A	1967.3323264633	0.388442295441477	0.0600352158754601	6.47024067086359	9.7846945406531e-11	1.82308277857641e-09
BAZ2B	1068.9440712857	0.256468806549524	0.0682522174243269	3.75766262589018	0.000171507902299363	0.00064207565436889
BBC3	126.469252761081	-0.227076501373584	0.109518654370699	-2.07340477910708	0.0381346245523822	0.0713893755534868
BBOX1	916.790112866521	-0.230264407440076	0.155187866077144	-1.48377842456839	0.137867712728727	0.21449292608588
BBS1	1244.69557662327	-0.0455573790283062	0.0604732188604719	-0.75334800903222	0.451240816334733	0.574976768211473
BBS10	688.755958783946	0.163364053123562	0.0596162268463058	2.74026153222888	0.0061390312942955	0.0145930267000584
BBS12	99.5730593895444	-0.283950980177083	0.0769465623129688	-3.69023607607257	0.000224046032327722	0.000806894286418432
BBS2	2743.47250572857	0.154892009080531	0.0629096993210436	2.46213240171565	0.0138113670645234	0.029469532108107
BBS4	414.265431534416	-0.373396648532019	0.062750806314485	-5.95046773838547	2.67377273474014e-09	3.41550625428496e-08
BBS5	313.091884076621	-0.244437841764384	0.0539139230895361	-4.53385373864263	5.79171416324644e-06	3.21226704666436e-05
BBS7	339.905629238907	-0.122397533936808	0.0743313711261161	-1.64664706277433	0.0996306109994986	0.162699992968868
BBS9	334.555931453298	-0.104059690412612	0.0558831387312047	-1.86209459195079	0.0625897581815458	0.109437295292568
BBX	1986.32903857658	0.161093566951522	0.0751362003895175	2.14402067334238	0.0320312303566785	0.0613715073408127
BCAM	615.204885222539	-0.481828746908854	0.112962242956747	-4.2653964218234	1.99547573540726e-05	9.59535075156053e-05
BCAN	79384.1992821953	0.562029339176854	0.145300066080963	3.86805976305394	0.000109704781148304	0.000434772636763973
BCAP29	1609.26109063345	-0.23578409366531	0.0558518101909991	-4.22160164297249	2.4257252681741e-05	0.000113592074301422
BCAP31	3303.44221109094	-0.210221052801058	0.0559043126381784	-3.76037273119951	0.000169660374382381	0.000636514382260962
BCAR1	2614.61574808798	0.184965212725952	0.0855391447544707	2.16234582724519	0.0305915298425976	0.0589988220139447
BCAR3	346.673932023427	-0.616044449652448	0.124182841298877	-4.96078559009439	7.02086545204578e-07	4.91257372802335e-06
BCAR4	0.0496449485394923	-0.0576883616233314	1.88272816234029	-0.0306408342835978	0.975555976377127	0.999052814291159
BCAS1	3824.59631739643	-0.161612573851699	0.227431585849319	-0.710598632323537	0.477332990863989	0.602428872573059
BCAS2	582.89983080754	-0.587870506631037	0.0586287808185302	-10.0269952474474	1.15992773690085e-23	5.34119105515771e-21
BCAS3	772.33808535589	-0.0369212821645028	0.0525118350796045	-0.70310401661897	0.481990929211425	0.607118963849743
BCAS4	350.811982593002	-0.624366183023424	0.095624257714418	-6.52937024502814	6.60468006784041e-11	1.28752277687542e-09
BCAT1	439.564828241732	-0.926273655121477	0.171945190141686	-5.38702858950697	7.16320434874206e-08	6.42436569753938e-07
BCAT2	230.330801162279	-0.413553109005317	0.0848484660678371	-4.8740198635374	1.0934998772998e-06	7.30006476595724e-06
BCCIP	1199.14237453758	0.235091202487928	0.0526068401748451	4.46883336285879	7.86473682075894e-06	4.19365894991668e-05
BCDIN3D	192.728896101464	0.0340514005553727	0.049967976952709	0.681464462481638	0.495577645921671	0.620860558526233
BCHE	1851.2392107478	0.610006581840332	0.118965397496333	5.12759671869408	2.93464226417231e-07	2.27020242315272e-06
BCKDHA	927.227712989467	-0.238361524380093	0.060258854446166	-3.95562654768089	7.63343274802264e-05	0.000315922510906822
BCKDHB	632.563578507455	0.0536456136316699	0.0728517680072396	0.736366667537004	0.46150758414893	0.585974046575651
BCKDK	884.554120258767	-0.0810999331779992	0.0485996457546259	-1.66873506830613	0.0951698959892901	0.15655233379543
BCL10	161.853162437293	-0.488938855872336	0.0593055429638502	-8.24440400402994	1.65985450793453e-16	1.35449730731873e-14
BCL11A	165.050990975156	-1.1374498110292	0.278267569782099	-4.08761183317155	4.35836593827263e-05	0.000191309117671795
BCL11B	128.430184739334	-0.304991058959702	0.160617092012807	-1.89887050710259	0.0575815039561016	0.101877805005123
BCL2	696.902953984103	0.190910346830363	0.0986055942307602	1.93610056629838	0.0528553851985666	0.0946853602945792
BCL2A1	26.185875079022	-0.907519030201519	0.234312657741018	-3.87311141852433	0.000107454672753739	0.00042734389698896
BCL2L1	2363.86428731199	-0.378479075087142	0.0741472091544382	-5.10442779173014	3.3179693351391e-07	2.52536509018458e-06
BCL2L10	0.790242847160255	-1.27629425934575	0.415852777663836	-3.06910120094827	0.00214703846947629	0.00584841183093964
BCL2L11	444.736806827733	0.0335549030625249	0.115088930503982	0.29155630272682	0.770625889782808	0.876287906185296
BCL2L12	38.4213321332927	-1.26523429247135	0.154662238683205	-8.18062833723061	2.8236757491208e-16	2.16705908682525e-14
BCL2L13	1370.16279461639	0.0825995409656515	0.0443311049897899	1.86324119339401	0.0624283396571254	0.109184670733298
BCL2L14	1.21109581038418	-0.951415591558514	0.306631913393813	-3.10279377325149	0.00191703176296777	0.00529270439625934
BCL2L15	8.54985100101113	-0.330021836314876	0.123173102774861	-2.67933362787896	0.0073768852160328	0.0171301885004916
BCL2L2	1953.68971253449	-0.171715308368165	0.098022899656296	-1.75178768400304	0.0798103227443586	0.134841586605739
BCL3	99.5221410069737	-0.59341153333825	0.142253198076477	-4.17151629181105	3.02579418608119e-05	0.000138440642438633
BCL6	2309.51696874755	0.145305156059133	0.0830781914247475	1.74901684265419	0.0802881080857172	0.135435849138925
BCL6B	164.374873272266	-0.0522329124484084	0.131239228437762	-0.397997710518232	0.69063187338982	0.806947523490056
BCL7A	1493.89335694394	0.425792486664983	0.0843285144732571	5.04921128190884	4.43637868006399e-07	3.28482249894477e-06
BCL7B	977.232397521573	-0.222388708657771	0.0447043083623533	-4.97465941884587	6.5362454935351e-07	4.62704933546738e-06
BCL7C	551.340166837864	-0.024634107047958	0.0916263420972443	-0.268853983298967	0.788042049496737	0.890802106333912
BCL8	3.7469670535164	0.44503220279345	0.225398643864864	1.97442271684769	0.0483336970839494	0.0876158685540895
BCL9	880.224338252451	0.288229713993693	0.0509870408390423	5.65299945340203	1.57671808292633e-08	1.65816898987467e-07
BCL9L	1457.01874256001	0.308791462926883	0.0671012944624726	4.60187043186745	4.18713661266638e-06	2.42380191825704e-05
BCLAF1	3271.00191598667	0.12995396122011	0.048103340646943	2.70155792658796	0.00690154571183382	0.0161651803399378
BCMO1	27.8635481855629	-0.347670533592152	0.154803929738241	-2.24587666592206	0.0247119088790736	0.0489329699724872
BCO2	46.0250148223064	-0.654323753298303	0.143664384656909	-4.55453002399253	5.2502826018359e-06	2.94405524846351e-05
BCOR	694.837933732483	0.126965094580327	0.0899345511333702	1.41174991124425	0.158023611546213	0.24113749781472
BCORL1	309.87235522465	-0.210402935559692	0.0919216408701799	-2.28893798639694	0.0220829557680832	0.0443447580266564
BCORL2	0.648072156267593	-0.307207010734611	0.451702947916548	-0.680108491989225	0.496435767852543	0.621589262609619
BCR	5400.2971439052	0.310849586577908	0.0904104534219643	3.43820404402917	0.000585586265213333	0.00187472907949443
BCS1L	423.332144722041	0.0535863779531196	0.0493742137231581	1.08531101383364	0.277783929460756	0.386471562892671
BCYRN1	0	NA	NA	NA	NA	NA
BDH1	304.06673207715	-0.404657382681747	0.171915833879439	-2.35381101059909	0.0185820558827102	0.0382112664297305
BDH2	979.865741090136	-0.450634564634708	0.136312305417883	-3.30589790300463	0.000946725771212888	0.0028640194611696
BDKRB1	0.856449493756707	-1.89390801328625	0.446885382164563	-4.23801737285028	2.25502323538684e-05	0.000106735558914296
BDKRB2	23.3575521587961	-1.41975811553174	0.23752762756295	-5.97723359635492	2.2695864720474e-09	2.94391699325264e-08
BDNF	54.2762061942934	-0.683075166110093	0.233339085761623	-2.92739282782618	0.00341816843892901	0.00876174653530644
BDNFOS	310.856239919122	0.222013343070729	0.0790982480602468	2.80680480940144	0.00500355499412896	0.0121997924339957
BDP1	892.673983490815	0.340756698457224	0.0675715974061195	5.04289837058616	4.58532816434484e-07	3.3808710140461e-06
BEAN	66.2463658611419	0.247549400005847	0.186294065226591	1.32880990977759	0.183910691940673	0.274489333395015
BECN1	1347.84219183205	-0.102939760049986	0.0289216855577781	-3.55925866922034	0.000371903099665998	0.0012561309723263
BEGAIN	211.788306065444	-0.780575803312302	0.199197138079567	-3.91860952841858	8.90612573591528e-05	0.000361023835113396
BEND2	0.0864358125079136	0.0922223944755523	1.45000546746945	0.0636014115426051	0.9492876077714	0.999052814291159
BEND3	124.517620756762	0.0354121472204711	0.0848574681611266	0.417313266443807	0.676449286106661	0.794517745250991
BEND4	66.5248550375318	0.789990764402611	0.18772560000547	4.20822074549019	2.5738936179228e-05	0.000119862996799006
BEND5	208.975580148698	-0.263176373833781	0.0669113812676694	-3.93320790645438	8.38196788099363e-05	0.000342866452661626
BEND6	547.241978615885	-0.0244457771085494	0.0985617352086964	-0.248025027732999	0.804115042368641	0.903034774011824
BEND7	356.956001839874	0.267332846559579	0.0779720815591378	3.42857137085434	0.000606766974655923	0.00193580885678746
BEST1	628.583432853104	0.22818391170528	0.156481743117536	1.45821427573111	0.144781490090359	0.223540956278744
BEST2	0.376447286350032	0.272763847863279	0.645437230482832	0.422603213730377	0.672584781473785	0.790891328126892
BEST3	875.017426977936	0.487136383181456	0.186134772175072	2.61711649837932	0.00886760707895895	0.0200936755602889
BEST4	10.8875850627746	-1.16637825835146	0.216923803483196	-5.37690303978932	7.57779545352595e-08	6.75366654705953e-07
BET1	322.068147045432	-0.18026216161922	0.0497516524019407	-3.62323968986784	0.000290935987246592	0.00101620046836718
BET1L	1041.63964136909	0.0766050610269375	0.0464707895456138	1.64845619745163	0.099259092141249	0.162189155289942
BET3L	0.101070869239016	-0.285053024554439	1.018490349933	-0.279877982715489	0.779571119683511	0.884107761845645
BEX1	4253.7249011085	0.260233663295215	0.112257031938796	2.31819476072642	0.0204387386536376	0.0415302800547754
BEX2	1209.80188271022	-0.0708137752584543	0.143840391386935	-0.492307998995658	0.622501626251242	0.744998852209098
BEX4	3109.76927338069	-0.00352776258605052	0.077539153848579	-0.0454965318932891	0.963711539186245	0.999052814291159
BEX5	291.772704370247	-0.402368650919048	0.237511068034836	-1.69410484424259	0.0902453619808853	0.149776478221087
BEYLA	0	NA	NA	NA	NA	NA
BFAR	821.377533387001	0.0533102875778845	0.0375419765718325	1.42001813558966	0.155602401338412	0.237930933102853
BFSP1	20.7537656400639	-1.08699623071183	0.205100083364851	-5.29983319791332	1.15908525111182e-07	9.92328851549471e-07
BFSP2	0.265137772181331	-0.236457086498276	0.63782305509411	-0.370725210714415	0.710842210869906	0.824745837076248
BGLAP	62.9082432362714	0.234734651609205	0.100919160982216	2.32596713373956	0.0200203040794976	0.0408043714719658
BGN	2097.70167721389	-0.435777529967586	0.181055014049863	-2.40687910387045	0.0160894951230178	0.0336824481575557
BHLHA15	2.4217740439453	0.183600921497215	0.280809012793583	0.653828449702135	0.513222335201926	0.63810478706559
BHLHB9	384.384492729104	0.0218002748961368	0.112034037640084	0.194586175374412	0.845716926635077	0.936179928543003
BHLHE22	40.2576509414103	-1.37617571970384	0.289981578090537	-4.7457349834622	2.07750573690816e-06	1.30324232733713e-05
BHLHE23	0.0948919771642173	-0.548059848446204	2.90048782817136	-0.188954369373007	0.850128580424992	0.939728323355016
BHLHE40	1106.21607754826	-0.525452128370988	0.146338310060222	-3.59066691527839	0.000329832924791981	0.00113082233034514
BHLHE41	1340.08917312781	-0.742335529332263	0.132016628851806	-5.6230456404516	1.87619805756763e-08	1.93111604222235e-07
BHMT	4.40172089066247	-0.950798506570528	0.279875509131718	-3.3972193905793	0.000680743657917706	0.00213726986105981
BHMT2	37.633809696804	-0.744575516343216	0.172228357483719	-4.3231876981327	1.53790783866443e-05	7.61473056829749e-05
BICC1	32.9974883955301	-0.610761585554424	0.195904143147749	-3.11765527640624	0.0018229588986131	0.00506479314741809
BICD1	206.322043978668	0.0125731585435111	0.0991695028557247	0.126784527313835	0.899110942319377	0.974708835451612
BICD2	1104.48636444099	0.0587957618920896	0.0455818488606492	1.2898941873077	0.197087399249215	0.290989411518422
BID	1546.94045093	0.35484401497261	0.0842309021737034	4.21275334604443	2.52276503470946e-05	0.000117737151957724
BIK	1.13832919014649	-1.10214529910271	0.291014829027583	-3.78724789656079	0.000152325109127061	0.000580944115661085
BIN1	3324.56604712121	-0.440895806292298	0.0995538006305852	-4.42871897908079	9.47944413724614e-06	4.96701299415715e-05
BIN2	126.560138251086	-0.81198859080347	0.137854397247896	-5.89018999040935	3.85751872312181e-09	4.70987450158938e-08
BIN3	293.205890983071	-0.226817207754945	0.0573445309791424	-3.95534157978279	7.64253779005294e-05	0.000316164023229142
BIRC2	1041.17644855339	-0.00434214968533449	0.0426381486258015	-0.101837200377573	0.918885897501534	0.988679444023676
BIRC3	40.9199738810659	-0.943096383785612	0.173078086519509	-5.44896469998418	5.06638666563943e-08	4.6972156334356e-07
BIRC5	106.485067512633	-1.008269825966	0.250750914980266	-4.02100158256789	5.79512156329666e-05	0.000247357428899045
BIRC6	2041.1552908268	0.369378974377447	0.072680452431806	5.08223273271483	3.73023967814764e-07	2.80930044296633e-06
BIRC7	11.4649223305502	0.0687816369794785	0.204417851801173	0.336475686313243	0.736512183351988	0.847865811073062
BIRC8	0	NA	NA	NA	NA	NA
BIVM	766.245442753916	0.278309809002897	0.0716694540244783	3.88324165142715	0.000103073039029695	0.000412169687381552
BLCAP	2946.91359025256	0.0488300644192576	0.0606494712977981	0.805119374899322	0.420750796260913	0.543429971930417
BLID	0.0142311408410273	-0.0326601799090751	2.90048782817136	-0.0112602368442504	0.991015820726465	0.999052814291159
BLK	9.10034693758823	2.17512537401186	0.304409320796915	7.14539675827794	8.97363154264223e-13	2.83521622881435e-11
BLM	334.696218183959	0.371215385505076	0.167820639901524	2.2119769399217	0.0269682583260746	0.0528168218760793
BLMH	877.497452947576	0.141688821407875	0.0601057604498522	2.35732516064062	0.0184071210620888	0.0378958613307215
BLNK	67.5536802372997	-1.02045386932928	0.181690250330012	-5.61644814444249	1.94922711952185e-08	1.99883629329547e-07
BLOC1S1	1282.95282828998	-0.308656213964766	0.0974511038544504	-3.16729315273601	0.00153865126278249	0.00436311629671297
BLOC1S2	1085.50062561213	-0.0641694806455805	0.0519261330394015	-1.23578392785168	0.2165388907261	0.314900529862605
BLOC1S3	248.710772714652	-0.272453407985479	0.0443034389105556	-6.14971240800373	7.76235676974411e-10	1.13472396014249e-08
BLVRA	852.198933897397	-0.0334360015726802	0.0649263407913981	-0.5149836132011	0.606564470997066	0.729537118724083
BLVRB	393.924140140304	-0.872827318403254	0.121221749312335	-7.20025344754234	6.0100739754336e-13	1.96342619400145e-11
BLZF1	322.573595432628	-0.0183270792049197	0.0499347183858484	-0.367020778275054	0.713603519115895	0.827403600701523
BMF	228.598939102335	-0.48668982550758	0.165291011584145	-2.94444217409741	0.00323537399133055	0.0083552053668491
BMI1	1452.33131981063	-0.075103458140794	0.0632821809044009	-1.18680262069746	0.235305484884536	0.337022000864025
BMP1	593.160859001601	-0.117311818726505	0.0911402167500351	-1.28715755689115	0.198039377376964	0.292149623071737
BMP10	0	NA	NA	NA	NA	NA
BMP15	0.0748886678351928	-0.0838983100706115	1.27883657755133	-0.0656051848557984	0.94769216109115	0.999052814291159
BMP2	1810.2879877409	0.931464420672093	0.149002657737651	6.25132755894946	4.06978290202408e-10	6.49955419695671e-09
BMP2K	367.706185803789	-0.110366296657983	0.115747750762174	-0.953507052458862	0.340333224628724	0.457086428077745
BMP3	3.86879120411623	-1.00853416052892	0.37116321438052	-2.7172255262747	0.00658317327549544	0.015515302357797
BMP4	156.690577128194	0.142541013163222	0.130331630262849	1.09367935378196	0.274095632414237	0.382109819858095
BMP5	1.16462863050394	-0.51368576629331	0.836015728257524	-0.614445098256663	0.538921242149131	0.664038758246658
BMP6	153.179185199325	-0.0478833621672895	0.171688005501592	-0.278897538749995	0.780323457423236	0.884714249417597
BMP7	3481.90841005925	0.371813350604434	0.0787250548982291	4.72293542487956	2.32464678544924e-06	1.44190727487454e-05
BMP8A	152.351219256772	-0.450346585242223	0.15161822382918	-2.97026685756196	0.00297541158062632	0.00778258858118922
BMP8B	93.4495394629623	-0.789410582096419	0.22308997897695	-3.53852999456324	0.000402361566009539	0.00134700929316678
BMPER	293.053973372867	0.466382083088568	0.168773844790628	2.76335520866481	0.00572104687937917	0.0137208639195428
BMPR1A	718.940808947504	0.131328358744365	0.0718658568066253	1.82740962927276	0.0676382026121103	0.117016087174006
BMPR1B	800.919835478208	-0.200334351795148	0.149172367867909	-1.34297225859244	0.179280956801129	0.268699140152964
BMPR2	3031.41810189406	0.139225328642645	0.065723970926458	2.11833409759175	0.0341467828445337	0.0648976788731606
BMS1	892.487864741611	0.100956702180024	0.0415191176954483	2.43157147318406	0.0150334819250496	0.0317029266634456
BMS1P4	16.5515895623338	0.511721716639748	0.127357472708675	4.01799522051045	5.86953874478047e-05	0.000250092265529972
BMS1P5	80.5061112240021	0.718599236248941	0.115812059110656	6.20487401542816	5.47407374598789e-10	8.35584737548585e-09
BMX	2.8956293449139	-1.15591902355735	0.314824822059571	-3.67162606809518	0.00024101214070591	0.000861107482219158
BNC1	2.30115998945373	0.17736511624001	0.330884810079252	0.53603281515863	0.591935871379935	0.715234271678617
BNC2	60.7397487715185	-0.390059754443522	0.176269969132655	-2.2128542732652	0.0269076941006346	0.0527195627501036
BNIP1	207.778198015292	-0.103123667480166	0.0545095771175504	-1.89184493685907	0.0585116440338844	0.103240141922756
BNIP2	466.021356512338	-0.0716533823411722	0.0577891930004301	-1.23990972396238	0.215008786827985	0.313217078732543
BNIP3	1818.25408495812	0.036581936234542	0.0884412720773708	0.413629693188256	0.679145323812347	0.796861649125208
BNIP3L	3665.67285314594	0.0122077789148984	0.0474094916821767	0.257496515607819	0.796795504788618	0.898072443767811
BNIPL	5.53152847806992	-0.0268725393041975	0.123222272344329	-0.218081835312254	0.827365350116572	0.921359237131024
BOC	1050.11902522178	0.141024426482226	0.140716393330629	1.00218903529507	0.316252302442887	0.43066392149767
BOD1	803.1315639352	-0.0460059974954862	0.0496717803085885	-0.926199890756312	0.35434210931763	0.473173817178966
BOD1L	1508.00460802085	0.289619569926746	0.0687045090213308	4.21543758993791	2.49294328685185e-05	0.000116429662322422
BOK	747.691375342703	-0.833742364515318	0.216915561100913	-3.84362634143821	0.000121229543329626	0.000475092070515699
BOLA1	319.444799672331	0.087304280931635	0.0674680705206602	1.29400885867783	0.195662360907254	0.289216605009652
BOLA2	775.448113447566	-0.0126430477434923	0.0671519125936508	-0.188275318679273	0.850660832197139	0.940148579554949
BOLA3	148.600473951374	-0.499007644330979	0.0638151069333542	-7.81958486494618	5.29978225683902e-15	2.89541776404708e-13
BOLL	0.015025846183485	-0.0326601799090745	2.90048782817136	-0.0112602368442502	0.991015820726465	0.999052814291159
BOP1	596.053021314004	0.348050610779798	0.120722310779776	2.88306783171769	0.0039382262634296	0.00992381705989948
BPESC1	0.0100198270900731	-0.00409231936276031	2.90048782817136	-0.00141090726980928	0.998874259246189	0.999870641425771
BPGM	604.707442531575	-0.225557894566585	0.0533413498670618	-4.22857492599501	2.35176197849606e-05	0.000110691352309841
BPHL	319.418054154932	0.0199696805012972	0.0665910589310799	0.299885312260394	0.764264638139807	0.870641344267177
BPI	4.37204539928619	0.156877076732625	0.342336496024539	0.45825402361243	0.64676995121056	0.767441613375804
BPIL1	30.7751961410006	1.02368268273087	0.367939990430446	2.7822001123968	0.00539917375932292	0.0130427205227711
BPIL2	0.207674418550519	0.281304123987345	0.958000972902853	0.293636574433699	0.769035624800267	0.874891116684539
BPIL3	0.101129673500616	-0.138679112578895	1.5555330074735	-0.089152150364291	0.928960992361318	0.994415541720701
BPNT1	545.71841443507	0.0306895255151621	0.0478951133018791	0.640765276443307	0.521675196265884	0.646716114140902
BPTF	2344.26643380947	0.386356731460084	0.0666776775926227	5.79439394726056	6.85683360057033e-09	7.80524790082579e-08
BPY2	0	NA	NA	NA	NA	NA
BRAF	129.222492224959	0.2765185679038	0.11748755812885	2.35359873256145	0.0185926695470366	0.0382249632230985
BRAP	763.111763437995	0.12204829400941	0.036973861144133	3.30093450434177	0.000963633748075803	0.00290879923330514
BRCA1	202.221139794415	-0.567090210514787	0.105831214079726	-5.3584399975567	8.39436054561218e-08	7.39958673437281e-07
BRCA2	40.6557092545443	-0.518267038382865	0.186702602604446	-2.77589616402339	0.00550497867119427	0.0132618693947306
BRCC3	331.10964235936	0.00553922449103885	0.0440188464676695	0.12583756585051	0.89986050486906	0.975357404257559
BRD1	856.469728980113	0.164631617168546	0.040774010315201	4.03766065432053	5.39868716839571e-05	0.000231972028075479
BRD2	5160.70514568057	0.193072437157348	0.0428698524819758	4.50368792937937	6.67842557144041e-06	3.63525895163686e-05
BRD3	1743.14724311317	0.317565250088822	0.0611856241774302	5.19019384631797	2.10075264457037e-07	1.68373626796481e-06
BRD4	1607.19760663877	0.0488831544878092	0.0484804097821983	1.00830737007835	0.313306925937599	0.42728692952776
BRD7	1515.05470772576	0.0849910808817541	0.0435100337085739	1.9533673876471	0.0507760777007738	0.0913922143073956
BRD7P3	0.426297187516508	-0.275987178192826	0.366074544854118	-0.753909776225516	0.450903399891168	0.574633680897355
BRD8	1684.88647990641	0.275615940672904	0.0399096181701792	6.90600294639867	4.98499630905316e-12	1.28718062239103e-10
BRD9	1044.93560403599	0.141612450539071	0.0435319897818431	3.25306633693406	0.00114166841207433	0.00336429484831898
BRDT	0.0358738445911839	-0.146928863764009	2.35814345658678	-0.062307008232941	0.950318347559989	0.999052814291159
BRE	552.51450270657	-0.0925562779477349	0.0436765097182812	-2.11913173796931	0.0340793351775925	0.0647811734476875
BREA2	6.03263783204932	0.198358350667303	0.130313837874845	1.52215876611515	0.127969304125413	0.201459205680545
BRF1	1235.07719302693	0.0361184495242649	0.0563160968466792	0.641352145241839	0.521293917114936	0.646312222386234
BRF2	370.575017302338	-0.0906435761543871	0.0439053687633593	-2.06452146303421	0.0389683010493906	0.0727879990627019
BRI3	885.876438431163	-0.18671706437232	0.073221194397392	-2.55004122657374	0.010771018127792	0.0237689971008097
BRI3BP	79.4672086254054	0.196594719088624	0.101919869017449	1.92891455791575	0.0537414702372865	0.09602365432272
BRIP1	29.9508076013883	-0.902952897623999	0.22685816118764	-3.98025309249132	6.88419348933671e-05	0.000288157688973784
BRIX1	435.015975608523	-0.0319803059132296	0.0489054366668708	-0.653921283457092	0.513162521019988	0.638071438634857
BRMS1	726.946690727806	0.0256598715509846	0.0754789970041116	0.339960420374781	0.733886334527983	0.845648338284747
BRMS1L	503.328006527311	0.0512443964296684	0.0592735997166917	0.864539975209871	0.387291330253467	0.508362584980457
BRP44	748.419847862613	-0.139640435918538	0.0511617435664068	-2.72939165447494	0.0063451295513455	0.0150183338052897
BRP44L	1443.0317486921	0.1379353622169	0.074020562295338	1.86347358003775	0.0623956662721982	0.109137395831086
BRPF1	566.208445329633	0.114609327826803	0.0410513255915402	2.7918544937419	0.00524069169116161	0.0126979425340849
BRPF3	1401.43445711629	0.471792040902375	0.0755284581991015	6.2465466944748	4.19626611421039e-10	6.67948861307233e-09
BRS3	0.194467204029635	0.192065929723482	0.640181081530375	0.300018128096416	0.764163327989514	0.87057721273075
BRSK1	1545.99664207319	-0.319480346468253	0.132958901059652	-2.4028503840064	0.0162678416817838	0.0340154903756031
BRSK2	1092.35797261692	0.278636310785839	0.111541684120584	2.4980464745773	0.01248798207312	0.0270063259861501
BRWD1	1765.03560029599	-0.0305296199698431	0.05272463393411	-0.579039012541954	0.562562849728222	0.687691392057633
BRWD3	216.911183956844	0.77201216142895	0.132900459511288	5.80895027953893	6.28657539340636e-09	7.22844043451124e-08
BSCL2	2424.23802569901	-0.677835318163134	0.127831904380494	-5.30255198377975	1.14194933512307e-07	9.79392467462537e-07
BSDC1	2120.6534951114	-0.237107912891737	0.0430029274075397	-5.5137621363462	3.51243239112108e-08	3.40674234926187e-07
BSG	11146.0302246776	-0.237436602493548	0.0653939923667108	-3.6308626205611	0.00028247552156668	0.000991483954101561
BSN	2310.84618323875	-0.0210052373778753	0.169760522452789	-0.123734523635888	0.901525475788544	0.976669432094468
BSND	0.0265852002823842	-0.0897959010017033	2.90048782817136	-0.0309588959931322	0.975302320192461	0.999052814291159
BSPH1	0.00489557662637927	-0.0338383586125489	2.90048782817136	-0.0116664370330706	0.990691741163476	0.999052814291159
BSPRY	29.5764334096291	-0.0927710767672643	0.195431628816684	-0.474698375738781	0.63500197582282	0.756821236976233
BST1	22.1317022943732	-0.931786949411527	0.141091610214914	-6.60412726165793	3.99865924711589e-11	8.19216841517175e-10
BST2	549.843516630051	-1.18538422002831	0.145348435835614	-8.15546595471423	3.47836205326131e-16	2.6380989062774e-14
BSX	0	NA	NA	NA	NA	NA
BTAF1	937.059669281667	0.469355622976009	0.0836721720851033	5.60945905047888	2.02960012469821e-08	2.07355871165681e-07
BTBD1	2171.28137338988	-0.130927339563212	0.0466010535586037	-2.80953604189578	0.00496129636945461	0.0121196756075852
BTBD10	694.312583194095	-0.160299362009201	0.0741370366832167	-2.16220352445635	0.0306024920083457	0.0590140787158646
BTBD11	267.572390778601	-0.372868596096984	0.173346307363275	-2.15100397446355	0.0314758859801384	0.060451205050236
BTBD12	388.943265738289	0.246117141470086	0.0531179313809752	4.63340975582938	3.59691595618514e-06	2.11763636507216e-05
BTBD16	5.72147077228143	-1.07210914802121	0.319818020408549	-3.35224746451639	0.000801583339379078	0.00247193878821538
BTBD17	969.096021524105	0.859692898270104	0.180349138199905	4.76682565190411	1.87151125763502e-06	1.18867086117114e-05
BTBD18	4.23774907369274	0.530982542047955	0.116517782057931	4.55709448523451	5.18660961631434e-06	2.91426583322253e-05
BTBD19	11.1678204298577	-0.482082923173655	0.144481250480705	-3.33664694602042	0.000847955894750642	0.00260102569460387
BTBD2	3078.33344351896	0.0127891080748992	0.0542051245880316	0.235939095650063	0.813479930560247	0.911339207727638
BTBD3	1587.68178888902	-0.363015845672816	0.0930567582380537	-3.90101538615997	9.57900617992648e-05	0.000386034547863676
BTBD6	888.873527558379	-0.170395879596292	0.0860463642174788	-1.98027983106436	0.0476720938159228	0.0865951248614583
BTBD7	638.043216523422	0.188205185282543	0.0700733714910802	2.68583031296703	0.00723498219561394	0.016852289011583
BTBD8	13.6811131057578	0.117104750531938	0.189586811419933	0.617684055419612	0.536783624396141	0.662205479098129
BTBD9	894.567506390923	-0.0448470141699989	0.0855492328159103	-0.52422462123656	0.600122317971508	0.72327323671521
BTC	7.68633522881704	0.326753461340772	0.265688612256409	1.22983615506046	0.218758466185493	0.317626781984042
BTD	355.700732553376	0.135950892449625	0.0660089845123821	2.05958163807418	0.0394385531013164	0.0735314390224101
BTF3	5764.50161789681	0.163274314286916	0.0620156441488391	2.63279236276339	0.00846861020447256	0.0193066797898878
BTF3L1	0.00506729580444748	0.0244755411835526	2.90048782817136	0.00843842230463121	0.993267193029494	0.999052814291159
BTF3L4	993.567437590547	-0.313477465973999	0.0534276222279562	-5.8673295367049	4.42869932496381e-09	5.34317186180911e-08
BTG1	2074.38034396627	0.00967724304882988	0.0783339551640903	0.123538292284086	0.901680853654422	0.97678304540842
BTG2	3339.17251146979	0.0537633846761513	0.108495567389369	0.49553531051831	0.62022230326402	0.742868603773218
BTG3	448.412687944287	-0.233414273117985	0.0847399246365707	-2.75447817683392	0.00587858102366063	0.0140446889434956
BTG4	0.197815573432	-0.420825418295368	1.04931898262714	-0.401046226421791	0.688386090236997	0.805164014828154
BTK	103.323896333938	-0.841044834242437	0.143365167176514	-5.86645173863557	4.45219776362301e-09	5.36148846503543e-08
BTLA	1.35174497472668	-1.15687183772777	0.290123398956058	-3.98751649088115	6.67685646572841e-05	0.000280474378903535
BTN1A1	0.580107189831986	-1.36567831272859	0.53032097183431	-2.57519197855762	0.0100184462468582	0.0223222062689214
BTN2A1	537.835590392706	0.0360781001725382	0.0474331053180463	0.760610125156871	0.44688997029244	0.570598271965128
BTN2A2	178.890002069844	-0.356302618314755	0.10380228382245	-3.43251232240897	0.000598016705857281	0.00191104479366818
BTN2A3	8.67455238862428	-0.564487125185614	0.15861885149831	-3.55876442083321	0.000372603548033521	0.00125827704190122
BTN3A1	550.608481665809	0.268756457944933	0.0840573418799455	3.19729903342391	0.00138721036169431	0.00398228416137271
BTN3A2	761.577094600057	-0.070351643557378	0.131660188377993	-0.534342571008635	0.593104544026825	0.716422577070689
BTN3A3	573.005181834925	0.318074104888881	0.0941584299959939	3.3780735819662	0.00072995545569816	0.002274055817204
BTNL2	0.605565825974554	0.214370280907096	0.553484078134097	0.387310655131725	0.698526238286097	0.814217541493075
BTNL3	0.574568618455196	-0.00771754359787379	0.431581049008537	-0.0178820261353068	0.985732967788829	0.999052814291159
BTNL8	1.94281691317328	-0.128848454975379	0.26223264310383	-0.491351699964988	0.62317771947789	0.745577302487002
BTNL9	203.366384376318	0.0581411636855806	0.134342484861033	0.432783149319616	0.665172316237765	0.784320972810534
BTRC	1247.34825133532	0.00187012864228367	0.0774221233305296	0.0241549645222172	0.98072900074283	0.999052814291159
BUB1	112.532786781798	-0.730305586564168	0.228757416177252	-3.1924892262216	0.00141052206568774	0.00404140692598531
BUB1B	105.93208113552	-0.868660492667057	0.24421030540501	-3.55701816606972	0.000375088227189865	0.00126530505469143
BUB3	1617.70235025835	0.13917550123787	0.0580101885714907	2.39915615972103	0.0164329049552749	0.034313580418378
BUD13	388.452942834279	0.0787456932552715	0.0506724867219848	1.55401280555483	0.120181362117025	0.190688944404238
BUD31	1125.96379405873	-0.265359502530482	0.0661865943574323	-4.00926358436636	6.0908398824891e-05	0.000258666761807947
BVES	150.624719420619	-0.926593582133595	0.164295960280825	-5.63978311182943	1.70264490231233e-08	1.77133686986124e-07
BYSL	397.234744829821	0.131494778146835	0.0673419733076992	1.95264218863929	0.0508620083845345	0.0915383623819931
BZRAP1	2265.26395120727	0.351940397979405	0.12572629884058	2.79925839879899	0.00512201307420266	0.0124587766136435
BZW1	2776.90090742655	-0.117035493406291	0.0437003057127196	-2.6781390083554	0.00740324864825665	0.0171800850560695
BZW2	866.33681015515	0.0637735664118629	0.0896983898641121	0.710977828124632	0.477097975383233	0.602210863066944
C10orf10	625.423615405667	-0.749152877009469	0.139638907574393	-5.36492937407403	8.09808995284719e-08	7.17111079157805e-07
C10orf105	91.3281299599029	-2.26930321933033	0.22671061315254	-10.0096911554972	1.38183242309024e-23	6.07378160512848e-21
C10orf107	49.5901932169755	-0.869584066265271	0.197115004132659	-4.4115569491607	1.02629952222195e-05	5.32191247247521e-05
C10orf108	2.45362703534343	-0.225518898630385	0.199918024397819	-1.12805685885342	0.25929590707312	0.3653363749593
C10orf11	13.6131965105618	-1.02298665958502	0.159194525253733	-6.42601658539784	1.30991116898989e-10	2.34788526489939e-09
C10orf110	39.9184791503543	-0.243875616459968	0.12878364885648	-1.89368463019517	0.0582668826187702	0.102902155953522
C10orf111	10.4829927038908	-0.0765545620687099	0.107420020694012	-0.712665679769109	0.476052658592951	0.60126899282655
C10orf113	0.00515288794335091	0.0244755411835537	2.90048782817136	0.0084384223046316	0.993267193029493	0.999052814291159
C10orf114	47.7822861283555	-1.08694634266809	0.166559627495465	-6.52586919779033	6.76083027995383e-11	1.31147901318262e-09
C10orf116	352.33878166095	-0.692109064568186	0.153688831583339	-4.50331398474381	6.69019271680207e-06	3.63961539080034e-05
C10orf118	238.114066177143	0.206142403709334	0.104193716654347	1.97845331108776	0.0478775906904867	0.086886797781178
C10orf119	1064.04622224969	0.103612836660824	0.0483798421723909	2.14165305235231	0.0322214112147916	0.0617114372047999
C10orf12	53.4535244456674	0.241746373444593	0.105387200267051	2.29388742496251	0.0217969659182527	0.0438205115238054
C10orf120	0.243946124885094	0.0230125780714793	0.863197127407259	0.0266597018697236	0.978731154947818	0.999052814291159
C10orf122	0.00501067358228353	-0.0338383586125489	2.90048782817136	-0.0116664370330706	0.990691741163476	0.999052814291159
C10orf125	35.3819810080597	-0.990231523588248	0.142310851355417	-6.95822921553029	3.44576267752888e-12	9.23006235227266e-11
C10orf128	12.7424292026615	-0.369070183292943	0.18006235746845	-2.04967983581805	0.0403956839794798	0.075084337161282
C10orf129	0.00990645463970724	0.0542215804333423	2.90048782817136	0.0186939520678929	0.985085252963837	0.999052814291159
C10orf131	1.12608383497105	-0.0249624709485594	0.21665286136639	-0.115218745744347	0.90827174067212	0.98177819498093
C10orf137	380.353568831057	0.333554141752787	0.058091409707715	5.74188410009421	9.36288990267401e-09	1.03296229730585e-07
C10orf140	33.5256919192777	-1.32944003865382	0.209835503233147	-6.33562966309225	2.36373930873568e-10	4.02707529028675e-09
C10orf18	1392.12483579042	0.147374536634064	0.072353939252986	2.03685574214236	0.0416645003754795	0.0771092284461027
C10orf2	476.017446342249	0.369978599491216	0.0732670886377329	5.04972432193348	4.42448103353921e-07	3.27726783564337e-06
C10orf25	102.462587132267	-0.0570129546236231	0.0737672724634119	-0.77287600204957	0.439595768395777	0.563255741405481
C10orf26	1602.47730499391	0.0417547263850873	0.0470361186474798	0.887716239896945	0.374693408040577	0.495420821298513
C10orf27	0.00493629380026609	0.0244755411835537	2.90048782817136	0.0084384223046316	0.993267193029493	0.999052814291159
C10orf28	241.999255908915	0.135301440928828	0.0396286186658727	3.41423560759504	0.000639612385158457	0.0020264391516719
C10orf32	913.352244207455	-0.021236990539474	0.0648284319831094	-0.327587601455595	0.743223497708896	0.853177950585732
C10orf35	151.475853927433	-1.02658508979911	0.216336291013557	-4.74532074572165	2.08176197964701e-06	1.30548886791093e-05
C10orf4	624.362976709848	0.128685585281541	0.0663366206139889	1.9398875627138	0.0523933559126819	0.0939708340305359
C10orf40	0	NA	NA	NA	NA	NA
C10orf41	31.4668225868008	-0.219473313168055	0.0827786997351269	-2.65132593131229	0.00801764289473746	0.0184070766363037
C10orf46	923.190570533869	0.0138386337248669	0.0443890677153786	0.311757701549395	0.755224672233705	0.862425907002826
C10orf47	14.2810701302069	-0.251540249284665	0.141210642004479	-1.78131227019481	0.0748614510832536	0.127662504536648
C10orf50	0.327405175408838	-0.870376992387285	0.503536443365128	-1.72852829989934	0.0838935518084573	0.140707769662264
C10orf53	0.448410314296053	0.867955040399254	0.591101457649666	1.46836897315465	0.142004024759375	0.220007837767068
C10orf54	1522.85431092296	-0.505233270587811	0.112605811691257	-4.48674240698215	7.23204246777618e-06	3.90801065456249e-05
C10orf55	2.1059696310043	-1.84314056407308	0.305019592885136	-6.04269564010328	1.51560397937224e-09	2.07004102832339e-08
C10orf57	552.326301924296	0.0984324932058938	0.0509308138342529	1.93267073104758	0.0532767730110937	0.0953166318255829
C10orf58	2824.21830785387	-0.455444268842056	0.154387240675224	-2.95001236404082	0.00317761212940426	0.00823021542556292
C10orf62	2.04516090817521	0.37705281623652	0.248826990142935	1.51532121181841	0.129691079106133	0.203788224724781
C10orf67	1.54182037464882	-1.82322585907527	0.33982966407529	-5.36511685651824	8.08968280019846e-08	7.16694756554459e-07
C10orf68	5.356436571529	0.418177844772587	0.135259537881234	3.0916699208286	0.00199034031997019	0.0054670049408072
C10orf71	0.0405602774499546	-0.233813382436748	2.90048782817136	-0.0806117440541572	0.935750726198982	0.998492467298576
C10orf72	481.479806030031	-0.174111186723689	0.0799631705433033	-2.17739223620955	0.029451314460749	0.0571130473950552
C10orf75	531.938282296441	0.414486912465106	0.122654561933216	3.37930286433854	0.000726699036814933	0.00226537062733733
C10orf76	641.791245131044	-0.0394564386961692	0.0405672254897354	-0.97261861563968	0.330742887077145	0.446718865568265
C10orf78	149.897526049831	0.130799935983257	0.0710979668791407	1.83971415393078	0.0658102144535283	0.11427668027083
C10orf79	38.4345302474962	-1.91965110860151	0.215035446968646	-8.92713799358585	4.37171940082512e-19	6.71024231840936e-17
C10orf81	5.47864760243827	-1.68280984641576	0.437874314054786	-3.84313441643259	0.000121472894117495	0.000475949305557608
C10orf82	5.75276447622128	-0.779325984968195	0.32106406683174	-2.42732234926998	0.015210734251544	0.0320313153772715
C10orf84	595.124290365789	-0.144881036294426	0.0479431551532491	-3.02193370109491	0.00251165552452351	0.00671302070816537
C10orf88	202.123128546027	0.00860101391679353	0.0535741301146002	0.16054416372968	0.872452435145279	0.955232682048783
C10orf90	144.209238948098	-0.426687030883805	0.193168817489897	-2.20888151839581	0.0271828830175756	0.053183303749106
C10orf91	0.00540271079824132	0.0244755411835532	2.90048782817136	0.00843842230463143	0.993267193029493	0.999052814291159
C10orf93	13.396435521861	-0.857302943109688	0.168879844288166	-5.07640770704904	3.84637496956027e-07	2.88888900626391e-06
C10orf95	4.10301070694509	0.244835161609771	0.157351304580596	1.55597795812596	0.119713333836585	0.190149135709556
C10orf96	0	NA	NA	NA	NA	NA
C10orf99	0.0853715914524711	-0.0827209920486281	1.55845164684989	-0.0530789596301129	0.957668995599313	0.999052814291159
C11orf1	277.483173332005	0.096656870480246	0.0749828598306907	1.28905286752859	0.197379707676429	0.291287565544612
C11orf10	820.328921953427	-0.117766806128573	0.0570143808616282	-2.06556318509164	0.0388697436274589	0.0726389836462514
C11orf16	0.0953502489435132	0.0934017474784345	1.01898907354352	0.091661186467517	0.926967236233384	0.993555811526613
C11orf17	460.691495526975	0.170751444488399	0.0512518821706649	3.33161314778274	0.000863441917180375	0.00264475240390695
C11orf2	3430.496669044	0.217498705360146	0.0760583877246747	2.85962813394722	0.00424138035076726	0.0105897619395609
C11orf20	20.5136363576895	0.226986402088651	0.172706566064457	1.31428935946729	0.188748846679988	0.280433486578394
C11orf21	3.29464543102906	-1.02154442484183	0.209681891127208	-4.87187720098387	1.10542871848538e-06	7.37460897395902e-06
C11orf24	457.397383005453	-0.227122674347886	0.0732032732447398	-3.10263003661803	0.00191809259901172	0.00529487737152251
C11orf30	478.058678680306	0.362117192386093	0.0771098449323397	4.69612139284983	2.65148000822187e-06	1.61765373372274e-05
C11orf31	754.757377833558	-0.0999535051033138	0.0706755539242403	-1.41425853146418	0.157286007902863	0.240106669258929
C11orf34	0.0594241044004217	0.00180554741078642	1.47097888735364	0.00122744617635858	0.999020639892588	0.999870641425771
C11orf35	3.25768186490004	-1.04408711704903	0.227454770201253	-4.59030653050371	4.42595537811124e-06	2.54528626264262e-05
C11orf36	0.0247075775950867	0.0851457983866047	2.90048782817136	0.0293556820199744	0.976580918182029	0.999052814291159
C11orf40	0	NA	NA	NA	NA	NA
C11orf41	1747.28870405042	-0.0883413948105209	0.147604563845878	-0.598500429178889	0.549506072638782	0.674630066960836
C11orf42	1.95098031653662	0.829911108625799	0.204249729237998	4.06321766849816	4.84008560859218e-05	0.000210065752571141
C11orf45	22.3163493760284	-0.873981407605211	0.148477438596643	-5.88629098040603	3.94958700363013e-09	4.81013933565533e-08
C11orf46	707.013840226922	0.0895810991562457	0.0439202814663112	2.03962944146791	0.0413872473796192	0.0766768238645305
C11orf48	609.518702085428	0.0453374141192084	0.068506500689211	0.661797255196083	0.508101165459707	0.63308056564816
C11orf49	1396.57205681828	-0.0197610087885186	0.0712099454633558	-0.277503495613369	0.781393522071004	0.885667861270188
C11orf51	489.09353553318	0.0301590890021314	0.0792539588469496	0.380537318777637	0.703546599989972	0.818835604730461
C11orf52	13.6676041959817	-0.317120688398614	0.156624430602233	-2.0247204550354	0.0428960770089353	0.079048130476685
C11orf53	0.0548881530555224	-0.261199151396098	1.87155126906997	-0.13956291538083	0.889005343022856	0.967360949612165
C11orf54	514.277005974303	0.0461026244478442	0.0547099316798573	0.84267377114671	0.399410920181026	0.520916606462712
C11orf57	1062.06342782371	0.107179123231973	0.0418426817920348	2.56147834320638	0.0104227739308104	0.0231086149056371
C11orf58	3005.3120494592	0.0522877412645422	0.0391988395489064	1.33391043883596	0.182233210041969	0.27249035736908
C11orf59	2328.84805282785	0.11803753062628	0.05922079202437	1.99317716956076	0.0462420501519916	0.0843301508665269
C11orf61	217.166658630505	0.0686322758504285	0.0629347857947455	1.09053006193212	0.275479718420495	0.383762713696778
C11orf63	26.9496903515421	-2.13591472612905	0.254182863773377	-8.40306342615362	4.34979597434673e-17	4.02512220784047e-15
C11orf64	0	NA	NA	NA	NA	NA
C11orf65	8.12150197638108	0.381801520016106	0.108637338234835	3.51445945031155	0.000440649941405311	0.00146002567530901
C11orf66	47.3600583386532	-0.122910030438633	0.106013970945228	-1.15937578172724	0.24630304408183	0.350231664770427
C11orf67	230.001266204439	0.142245893488614	0.0887246618599638	1.60322835282397	0.108884247951551	0.175280618893208
C11orf68	1439.71409335573	0.115466029261294	0.0570788908396907	2.02291998955599	0.0430813972626395	0.0793367190115643
C11orf70	30.5647276347638	-0.727964703786853	0.22158114906824	-3.28531875048028	0.00101867058511464	0.00305064867081406
C11orf71	446.265589718162	0.171176935028777	0.0662097070913027	2.58537520476756	0.00972730790871253	0.0217562316357697
C11orf73	609.584564115043	0.0441819670118902	0.050711733712979	0.871237557405424	0.383624456995157	0.504645422274952
C11orf74	226.854412264954	0.0378068460873547	0.0454665554764422	0.831530906425136	0.405673776074606	0.527585961218672
C11orf75	86.0153524313924	-0.246062939400083	0.108860586289415	-2.26034920247356	0.0237995865323898	0.0473445796684241
C11orf80	93.5567216357026	-0.0983692546735876	0.0981487482891286	-1.00224665508529	0.316224479681749	0.430658505530951
C11orf82	52.186214279047	-0.565687984720409	0.163288111979794	-3.46435498495084	0.000531504620791511	0.00171980916280874
C11orf83	301.204043572626	-0.0981589811455402	0.0909488252396605	-1.07927706473261	0.280464233991432	0.389444161788793
C11orf84	413.627821297008	0.00319676565843418	0.060659938455384	0.0526997840722413	0.957971111073686	0.999052814291159
C11orf85	0.0100581364078786	-0.0624062191588631	2.90048782817136	-0.0215157666075115	0.982834226440392	0.999052814291159
C11orf86	0.727215454428255	-0.457917381848378	0.456231750240409	-1.00369468281653	0.315525800764635	0.429918908467525
C11orf87	334.763425312233	-0.822806766396079	0.309682398863085	-2.65693746049757	0.00788540697583593	0.0181487291339601
C11orf88	0.993647769157515	-1.97154308666632	0.468322070805338	-4.20980177866912	2.55594834927312e-05	0.000119170783690796
C11orf9	2233.47062368998	-0.503753293859574	0.232707686459533	-2.16474711911665	0.0304070564919316	0.0587250322103013
C11orf90	3.6463874668521	-0.415321354185116	0.327822111213254	-1.26691074207299	0.205187207278845	0.301040857895074
C11orf92	66.4898326006526	-0.425334963488198	0.243521253119872	-1.74660305020207	0.0807062177542382	0.136066098979522
C11orf93	63.0183261698984	-0.744470131489228	0.230380513289682	-3.23148047922407	0.00123150735381559	0.00358587055447056
C11orf94	0.0152094186221936	-0.032660179909075	2.90048782817136	-0.0112602368442504	0.991015820726465	0.999052814291159
C11orf95	926.550394736119	0.208250063825666	0.0660962870715325	3.15070744594607	0.00162875545432005	0.00458517183210333
C12orf10	869.046724534848	-0.0834929990272098	0.0588994632988851	-1.41755110065307	0.156321865191349	0.238917723470894
C12orf11	434.063224417923	0.0472377904161575	0.0609486278981279	0.775042721143989	0.438314415963847	0.561986263904853
C12orf12	0	NA	NA	NA	NA	NA
C12orf23	1256.64417573061	0.19055192432726	0.0499466982806646	3.81510552021867	0.000136124752899648	0.000524955677184284
C12orf24	405.138075238306	0.124398944671935	0.0624420460667146	1.99223043618757	0.0463457802215429	0.0844954175607693
C12orf26	44.5390975412956	-0.168706085786968	0.0672715347889358	-2.50783762131015	0.0121472473996267	0.0263637935931747
C12orf27	0.0151935787078981	0.0839676196831305	2.90048782817136	0.0289494818311541	0.976904881346026	0.999052814291159
C12orf29	583.488074584649	-0.0303128850189271	0.0471923415302061	-0.642326361355156	0.520661301514209	0.64571354809306
C12orf32	572.77200365416	-0.0462288584980013	0.0563697042688089	-0.820101135843304	0.412158454777378	0.534187408885839
C12orf34	1762.26347959482	0.546159601354221	0.126914672622769	4.30336059706495	1.68226712712856e-05	8.24298105869428e-05
C12orf35	398.724516723029	-0.104064422746456	0.0622516005968602	-1.67167465171497	0.0945884952224309	0.155675389124484
C12orf36	0.0340723921462541	0.0863239770900791	2.90048782817136	0.0297618822087948	0.976256958881038	0.999052814291159
C12orf39	41.7426060972141	-1.43219819037549	0.237631486821151	-6.02697146550034	1.67060483716403e-09	2.26256985649526e-08
C12orf4	449.616127156011	-0.118981035733616	0.0530198833987153	-2.24408331566604	0.0248270412375804	0.0491006214883736
C12orf40	0.0854091453027096	-0.257663383520507	1.2765940078462	-0.20183659169388	0.840044474172157	0.931883683061232
C12orf41	556.831362032419	-0.00607822568206109	0.0428225953801676	-0.14193968460109	0.887127647860167	0.966485393736797
C12orf42	0.882765866522883	-0.413240244871998	0.31087464738767	-1.32928255277335	0.183754768199399	0.274317058167051
C12orf43	427.160686833817	0.146861212822992	0.048532589876763	3.02603288215014	0.00247785354502901	0.00663367768007491
C12orf44	723.316887361325	-0.00932920048779637	0.064431570030777	-0.144792381798862	0.884874797283224	0.964955093287711
C12orf45	93.3698910258346	-0.0923536044524747	0.0832934254036651	-1.10877424004237	0.267527585823339	0.374563593520018
C12orf47	445.291564255381	0.224552253335807	0.0593362939483832	3.78439970536659	0.00015408002624741	0.000586136798942397
C12orf48	35.6431882622313	-0.583668080425711	0.140792724735486	-4.14558409550122	3.3894857075657e-05	0.000153260078101528
C12orf49	678.460906321699	0.157180296881771	0.0743481064511773	2.11411297993161	0.034505618829278	0.0654831388635303
C12orf5	365.771285561738	-0.433642286881649	0.0908523100798045	-4.77304634852694	1.81460009780072e-06	1.15670289688418e-05
C12orf50	0.156905356790534	-0.191101691799445	0.860371873895784	-0.222115224355409	0.824224186539815	0.9190783998893
C12orf51	2775.85614667137	0.203392441959367	0.0780960088176013	2.604389712596	0.00920380370225218	0.0207461029838645
C12orf52	420.103041456029	-0.205387969018857	0.0585804889175938	-3.50608150962652	0.000454755934643855	0.00150084979112835
C12orf53	2091.11742500633	0.108775664477966	0.102444945276237	1.0617963061492	0.28832816709267	0.398903122653426
C12orf54	0.701456343562281	-0.0680940407696073	0.319066267093787	-0.213416609000511	0.831002026798394	0.924663667123925
C12orf56	0.186366920841715	-0.829026428934629	0.991095927641081	-0.836474458035363	0.402888040043045	0.52452741127112
C12orf57	1522.8680185064	-0.110258409104819	0.0832193229383459	-1.32491355627232	0.185199824060046	0.276136350113428
C12orf59	28.3434362068782	-0.887885454712904	0.179627069565567	-4.94293792611703	7.69539915980205e-07	5.32673656945496e-06
C12orf60	20.0856231924766	-0.10514100389248	0.0839157276260728	-1.25293561608602	0.210229138830112	0.307179778254334
C12orf61	8.75601390461929	-0.0425913778158126	0.111316487836642	-0.382615178070618	0.702005114655274	0.817582736205769
C12orf62	500.704748348867	-0.248574641729712	0.0699809962891062	-3.55203062132466	0.000382270370906909	0.00128531101761815
C12orf63	6.57292592642678	-1.20938577168177	0.269746299374594	-4.48341932580993	7.3456381194835e-06	3.9583349465258e-05
C12orf65	463.172596797655	0.0564272531268561	0.0467719853341697	1.20643271231065	0.227650689210956	0.328099286782912
C12orf66	94.0039555335677	0.0856579375624135	0.0686411857888739	1.24790876757111	0.212064469490676	0.309464033799869
C12orf68	403.482772099431	-0.251044858882099	0.14013865468009	-1.79140337443076	0.0732285878213115	0.125308873514791
C12orf69	1.07864796723317	-0.182539427511923	0.248167061375668	-0.735550586367305	0.462004243761371	0.586527640432251
C12orf70	0.321437759478739	-0.63758998847019	0.521474453753852	-1.22266773353992	0.221455218736364	0.320675646178593
C12orf71	0.72853287067621	-0.127131802618623	0.285483416150088	-0.445321148012976	0.656087686969922	0.775974551492068
C12orf72	52.0803369460434	-0.0707349807334867	0.0492551254519722	-1.43609380921096	0.150975649465576	0.231809229966993
C12orf73	149.88409783563	-0.150079258672163	0.0546071227174216	-2.74834584214931	0.00598967936174202	0.0142766081902996
C12orf74	0	NA	NA	NA	NA	NA
C12orf75	119.56157532359	-1.0584224499695	0.137307179071687	-7.70842760826739	1.27377339167148e-14	6.4153066132621e-13
C12orf76	928.277276261199	0.0435150040133966	0.0723399144955406	0.601535187273121	0.547483582624447	0.672488567034411
C12orf77	0.0147425825400029	-0.0326601799090751	2.90048782817136	-0.0112602368442504	0.991015820726465	0.999052814291159
C13orf1	408.104425549472	-0.158404074004388	0.0776964074966177	-2.03875673416797	0.0414743123600867	0.076816050665014
C13orf15	2483.45845073292	-0.211327882408849	0.130454398492573	-1.61993681202616	0.105245851147773	0.170299342636455
C13orf16	11.9901564187548	-0.588876283849142	0.217868980778483	-2.70289181022919	0.00687391164016757	0.0161102097819729
C13orf18	87.6844820963701	-1.12291360242037	0.167801963248692	-6.69189788176766	2.20294581926487e-11	4.82502515793688e-10
C13orf23	813.735707701491	0.19585786783686	0.059545065395448	3.28923759737499	0.00100459180431789	0.00301455477044345
C13orf26	8.40551293545106	-1.98428586492954	0.357919939691654	-5.54393774942795	2.95744013936147e-08	2.91000893307899e-07
C13orf27	173.943656482082	-0.431063836146825	0.106436332914864	-4.04996888131821	5.12244442636407e-05	0.000221134096441699
C13orf28	0	NA	NA	NA	NA	NA
C13orf29	19.0199189890137	-0.761468352241867	0.151810066038542	-5.01592794280547	5.27781079486907e-07	3.82438594128017e-06
C13orf30	1.50206021727989	-2.49777506367645	0.649055725738698	-3.84832143778365	0.000118929937689816	0.000467026394907826
C13orf31	131.151494589111	-0.774766924097298	0.176145236512634	-4.39845515800666	1.09024146481309e-05	5.62573904201846e-05
C13orf33	8.81703613300817	-1.42519655862205	0.232459395119596	-6.13094840881271	8.73567325739506e-10	1.25611837024551e-08
C13orf34	72.5921222803819	-0.173725806533762	0.0884937847031301	-1.96314133378474	0.0496297538757365	0.0896208627410593
C13orf35	0.0711444725885551	0.0612980373844945	1.45945364089494	0.0420006745448293	0.966498160384065	0.999052814291159
C13orf36	90.8534318481455	-1.20273113229646	0.314147219652004	-3.82855889550379	0.000128895788083037	0.000500571193077497
C13orf37	350.031042703425	-0.20271359949845	0.0810704462105666	-2.50046236296684	0.0124031311424599	0.0268498495965049
C13orf38	13.4363912703046	-0.120357980543878	0.143901821075786	-0.836389558131385	0.402935784947942	0.524554259618552
C13orf39	2.35651488641855	-0.348318951024435	0.523500702196641	-0.665364821026729	0.50581717988364	0.630681726448945
C14orf1	842.59560548876	0.0278515985915167	0.0635152854430641	0.438502297474255	0.66102220506622	0.78033140731128
C14orf101	299.118821954344	-0.047902718086569	0.0614515507447862	-0.779520085433048	0.435673410580383	0.559230355122095
C14orf102	349.189733381783	0.332340586038693	0.0667442912359941	4.97931103745794	6.38110207099994e-07	4.53753888946901e-06
C14orf104	273.772537392296	0.0814398860380552	0.0473188921644452	1.72108606759074	0.0852352070947334	0.142599386264026
C14orf105	0.816501808601401	0.89575668923803	0.587510515987119	1.52466494618059	0.127342689237616	0.200588021697935
C14orf106	142.548615637009	-0.540587632910321	0.134165830874631	-4.02924969335496	5.59551601094556e-05	0.000239630822966535
C14orf109	247.328223870046	0.0645906251503593	0.0544475754222631	1.18629020024184	0.235507715346957	0.337211757963289
C14orf115	0.209662625776206	0.252736041083942	0.915459560872129	0.276075592943907	0.78249000645375	0.886443107123684
C14orf118	254.92415195882	0.384234360101275	0.0969026641065212	3.96515785860027	7.33473901007666e-05	0.000305193314231675
C14orf119	522.586334811068	-0.227675995998916	0.0451295073562811	-5.04494751519215	4.53645875190514e-07	3.34866840694067e-06
C14orf126	404.890553547914	-0.0968146362689233	0.0536947385384532	-1.80305629385997	0.0713793742175894	0.122556560490783
C14orf128	155.915856698431	-0.109689724858879	0.0801965090446526	-1.36776184107721	0.171386635627868	0.258590851384223
C14orf129	289.809973537146	-0.317708546475181	0.079561075447325	-3.99326611271772	6.51693587530921e-05	0.000274292796144679
C14orf132	5978.28668271941	0.317718718536128	0.124165936412303	2.55882352049532	0.0105027043932783	0.0232565036599499
C14orf135	1113.46479292925	0.134214635701147	0.0573567273098677	2.33999814836118	0.0192838354968705	0.0394989809902008
C14orf138	93.6464490679751	-0.422361660666641	0.0930315563598456	-4.53998274556376	5.62588319213314e-06	3.13287016803498e-05
C14orf139	116.073779080159	-0.221703098593707	0.101911458422401	-2.17544819812895	0.0295965460054138	0.057342937261541
C14orf142	134.924577957977	-0.364042834833384	0.0611223711864929	-5.9559671486343	2.58538265188504e-09	3.31134440314283e-08
C14orf143	47.4218823192154	0.0240326388645892	0.071675223621169	0.335299112446596	0.737399463184853	0.848382249732008
C14orf145	51.2272796090747	-0.189093638155908	0.0925068250251675	-2.04410472529419	0.0409432024489313	0.0759661963291814
C14orf147	992.620973661626	-0.122535018410703	0.0661392121114272	-1.85268337040761	0.0639277549323468	0.111414146200918
C14orf148	8.69120117882177	-0.138712161104153	0.113630194938387	-1.22073328466405	0.222187021042139	0.321590853686197
C14orf149	174.363204887442	0.245215469791938	0.0812547657868697	3.01785953620413	0.00254566868557117	0.00679735363508857
C14orf153	412.526559403553	-0.0606688717065834	0.0612769756342121	-0.990076143260418	0.322136903068153	0.437386106805538
C14orf156	461.846147857715	-0.138434027220372	0.0689579095609176	-2.00751484640177	0.0446948714260137	0.0818869660268193
C14orf159	1474.97779255478	0.0797067270861471	0.071161981876196	1.1200745817453	0.262681981275186	0.368991103854016
C14orf162	20.1512732914783	-0.960875228082483	0.278415396363449	-3.45122877769352	0.000558040321395259	0.00179575704089589
C14orf165	0	NA	NA	NA	NA	NA
C14orf166	1284.83881057275	-0.169289385081667	0.0540199574219587	-3.13383040566508	0.00172540547042662	0.00482564595778032
C14orf166B	0.533526388847772	0.347031774377491	0.355023049987104	0.977490825990302	0.328326217343669	0.443981893681063
C14orf167	559.400314146917	0.175074533242654	0.095718755039051	1.82905150794354	0.0673918923915562	0.116673457958347
C14orf169	87.1945274730253	-0.909625543820229	0.130244129452948	-6.9840041746284	2.86883532464994e-12	7.88114704243321e-11
C14orf174	22.0206382865448	-0.842510478433199	0.154621860106528	-5.44884454146875	5.06981017166526e-08	4.69813745663662e-07
C14orf176	27.0368886074164	0.51250018595802	0.106231531470721	4.82436974091138	1.40446668029169e-06	9.16077813317626e-06
C14orf177	0	NA	NA	NA	NA	NA
C14orf178	3.07045142026113	0.470972538891072	0.152263700561334	3.09313734760675	0.0019805245040715	0.00544313541406037
C14orf179	249.917767461678	-0.071454094540049	0.0727721476624998	-0.98188794525395	0.326155055182117	0.441756339184968
C14orf180	2.52793294355755	-0.814389236450818	0.347957206320497	-2.34048676577975	0.019258620949083	0.0394556916478036
C14orf181	9.87794652717822	-0.525702954804636	0.156605641793611	-3.35685834037484	0.000788334920026741	0.00243747359765263
C14orf182	0.295923690606264	0.233593215097346	0.422700486974712	0.552621116595307	0.580522879212154	0.705321804495732
C14orf183	0.0101135972797668	0.054221580433342	2.90048782817136	0.0186939520678928	0.985085252963837	0.999052814291159
C14orf184	0.178833927889716	-0.0138020248729987	0.766497976113962	-0.0180066031523959	0.985633585712052	0.999052814291159
C14orf19	3.75120617076634	0.76701096979519	0.183307723848133	4.18428069310731	2.86070463548074e-05	0.00013154072194531
C14orf2	947.682112880216	-0.275705237561157	0.0778421455928856	-3.54185043926069	0.000397330687828934	0.00133131938714685
C14orf21	374.428934142032	0.386259923439287	0.0787571249003651	4.90444418746801	9.3692256174686e-07	6.38031068457193e-06
C14orf23	71.333199109573	0.642484306890225	0.180635770473378	3.5567944555307	0.000375407653203707	0.0012659780319023
C14orf28	84.5046569472894	0.111582950951881	0.053674338924505	2.07888822084659	0.0376276256252427	0.070563199805313
C14orf33	52.6184929966676	0.284929328596636	0.0772114784187026	3.69024573071273	0.000224037528948761	0.000806894286418432
C14orf34	0.113715039976699	-0.0208712020993939	1.13484366630231	-0.0183912575089739	0.985326726761798	0.999052814291159
C14orf37	351.767591030107	0.343785077292309	0.101567460785106	3.38479543187243	0.000712313193094802	0.00222446910293129
C14orf39	0.549030515468956	-1.62752543373937	0.64970292863645	-2.50503016379364	0.0122440950866552	0.026556106198936
C14orf4	1249.7688424919	-0.0493605157133068	0.0803336432758079	-0.614443883042106	0.538922044955509	0.664038758246658
C14orf43	1052.77607457077	0.221312728464563	0.0647802812216073	3.41635948920124	0.000634644060862161	0.0020134540907274
C14orf45	98.1593556070087	-0.356461658309347	0.0804994887986592	-4.42812325430921	9.50565794212797e-06	4.97939936621763e-05
C14orf48	0	NA	NA	NA	NA	NA
C14orf49	79.4044609640231	0.416787356851289	0.12424222638187	3.35463528776645	0.000794696832270136	0.00245439743470208
C14orf50	6.07442069433139	-1.33294051047189	0.20267501246888	-6.57673826800214	4.80880148103685e-11	9.71810038069516e-10
C14orf53	0.0098927492315178	-0.0624062191588631	2.90048782817136	-0.0215157666075115	0.982834226440392	0.999052814291159
C14orf64	49.6822550379223	0.0719345885003645	0.126758087579892	0.567495059871634	0.570377882002497	0.695705615409201
C14orf68	0.45179418663597	-1.3236443335528	0.462773309747295	-2.86024346191356	0.00423315889099849	0.0105705994773287
C14orf70	0.0564419149889612	-0.202884881076687	1.86679135539134	-0.108681069521107	0.913455457237485	0.985087142173685
C14orf72	0.117216208057607	-0.458818354983228	1.1317048782217	-0.405422264949667	0.685167147638128	0.802418107988458
C14orf73	0.209309751633503	-0.826670260543501	0.997326938655709	-0.828885923464341	0.407168961416837	0.529139074976591
C14orf79	213.79765753197	-0.271706632551128	0.0774927795869221	-3.50621869546388	0.000454521598605123	0.00150033243164757
C14orf80	223.375994493703	0.178364025431439	0.109634061601164	1.62690338045039	0.103757619921055	0.168288524762933
C14orf86	8.67744788874485	-1.07190155332077	0.248569684642339	-4.31227788240992	1.61581176017028e-05	7.94958011744928e-05
C14orf93	220.470073304637	0.0679210817277909	0.06286287485488	1.08046413538337	0.279935549243834	0.388793789757684
C15orf17	1726.93279724558	0.0470563165305945	0.0455005318159647	1.03419267099828	0.301046099722874	0.413585195548285
C15orf2	0.467674339154115	0.22002785652123	0.492431931720469	0.446818823776297	0.655005878909222	0.774884615739194
C15orf21	19.0622290851417	-0.298805936607712	0.126196606039845	-2.36778108369546	0.0178951209793731	0.0369993200492918
C15orf23	227.620554722103	-0.301467068480173	0.0832988546371663	-3.6191022048659	0.000295626871791405	0.00102999136352664
C15orf24	1314.4060845249	-0.0437187658783971	0.0531480843516447	-0.822584038761206	0.410744578383162	0.532597764160642
C15orf26	1.95942818495158	-1.84572330822107	0.360656870161622	-5.11767128515794	3.09331103919579e-07	2.37965932768682e-06
C15orf27	39.4418171298133	-0.839906803157865	0.18800995690134	-4.46735277748409	7.91934756414003e-06	4.21464452092648e-05
C15orf28	4.89088628034435	0.639367917857334	0.161612103358803	3.95618833348045	7.6155130989486e-05	0.000315383347609563
C15orf29	465.870023880874	0.134638618125865	0.0489197119921611	2.75223652476612	0.00591897537989031	0.0141272348324175
C15orf32	0.0240896154080297	-0.148109800797806	2.90048782817136	-0.0510637553308343	0.959274717350874	0.999052814291159
C15orf33	29.348068752054	-0.260875946424418	0.0929419614358777	-2.80686938810088	0.00500255206381838	0.0121988849973834
C15orf34	6.76051712826104	-0.078637601432604	0.119801853283043	-0.656397203195308	0.51156858949272	0.63638191767447
C15orf37	40.264593534137	-0.21198953176544	0.122199134308996	-1.73478750863649	0.0827784495207808	0.139066644695266
C15orf38	413.026181787616	0.340291933120293	0.0716160489322323	4.75161556932999	2.01797765237997e-06	1.26919309909036e-05
C15orf39	720.193268208388	0.652234850699756	0.108034891808305	6.03726110872649	1.56751972139717e-09	2.13341529991705e-08
C15orf40	217.051374412331	-0.126688412067621	0.0480108403321039	-2.63874598301723	0.0083213306334856	0.0190143871677212
C15orf41	126.316981215988	-0.0617831208096979	0.0671990028655806	-0.91940532113674	0.357883607117043	0.477178142822724
C15orf42	72.9606973539171	-0.569511162823997	0.141901715108055	-4.01341986874738	5.9845324451688e-05	0.000254655352012243
C15orf43	0	NA	NA	NA	NA	NA
C15orf44	724.245767985564	-0.0753781795937423	0.0438345088030283	-1.71960817292276	0.0855036895453496	0.142961991510942
C15orf48	2.85160706331489	-1.50259292266453	0.367725232879998	-4.08618389033662	4.38526262776316e-05	0.000192358764393149
C15orf5	0.0751829418138079	0.0327295487141289	1.56474151691776	0.0209169043961969	0.983311941815909	0.999052814291159
C15orf50	0.60932449686297	1.54636259361694	0.431847006399307	3.58081119170037	0.00034252911540974	0.00116896295959491
C15orf51	4.88070905686471	-0.931921730235938	0.225870857353998	-4.12590513514268	3.6927947578448e-05	0.000165320950501663
C15orf52	621.695245029876	-0.0309578363754805	0.0997355303703241	-0.31039927556942	0.756257344965627	0.863382672418444
C15orf53	0	NA	NA	NA	NA	NA
C15orf54	0.143128405647596	-0.6587954836205	1.07965174503349	-0.610192579830511	0.541734244525649	0.666824101904662
C15orf55	0.0606789133266651	-0.0565091510517353	1.57990204294368	-0.0357675029943294	0.971467745332119	0.999052814291159
C15orf56	2.58062998974454	-1.5904102040504	0.267939083227463	-5.93571562943748	2.92566521688694e-09	3.68135102762481e-08
C15orf57	347.699160539171	0.0983868093810125	0.0533099405162958	1.84556216773376	0.0649558039800324	0.112981855290388
C15orf58	37.1197613371048	-0.0755676221129873	0.0616915545320294	-1.22492653469696	0.220602901730315	0.31956109051489
C15orf59	1065.49803117293	0.390667878253656	0.113895144544369	3.43006613509734	0.000603434151062229	0.00192612914367775
C15orf60	0	NA	NA	NA	NA	NA
C15orf61	99.6419705509521	-0.0676012559397385	0.0610473170705227	-1.1073583440472	0.268139028393522	0.375266575666164
C15orf62	33.8178565967332	0.467612999460106	0.102393138780419	4.56683919479112	4.95133547469428e-06	2.80160409832029e-05
C15orf63	919.785269056752	0.078463859040315	0.0786403409620012	0.99775583473409	0.31839777108433	0.433130259039949
C16orf11	1.07371634755589	-2.93481324954905	0.802118167411237	-3.65882904637466	0.000253370277666603	0.000900106754238077
C16orf13	601.944993673859	-0.101487869231888	0.0781989111220071	-1.29781691043684	0.194350257289057	0.287540848834942
C16orf3	2.39367619932251	0.190382639164538	0.189700760094365	1.00359449835538	0.315574107476526	0.429954437379078
C16orf42	1275.95006495166	0.0578916363857017	0.0741415203065746	0.780826130167284	0.434904763337351	0.55858042590527
C16orf45	2818.19786985413	0.0345297736213288	0.0741094128565277	0.465929661164321	0.641265849168966	0.762454292569027
C16orf46	75.3004327121122	-0.245632781680113	0.0796484709089031	-3.08396104629619	0.00204264338794571	0.00559636253334327
C16orf48	397.099003502069	0.0415214372555842	0.0944089700930486	0.439803942513737	0.660079111954693	0.779551173986552
C16orf5	3770.36785892957	-0.088722492698483	0.0804114606730913	-1.10335631209561	0.269872460992737	0.377173969908913
C16orf52	493.495124354542	-0.0353726049650229	0.0689716618318254	-0.51285707819064	0.608051299525852	0.730689209197836
C16orf53	889.301253870298	0.000707684303702833	0.0655714144154297	0.0107925734104083	0.991388939473701	0.999052814291159
C16orf54	10.7262332167834	-0.981181849124877	0.154003053720036	-6.37118437215264	1.8757398386467e-10	3.24189530647249e-09
C16orf55	162.629963947486	-0.451986986373189	0.0701946034133491	-6.43905605836407	1.20218796775476e-10	2.1850902833888e-09
C16orf57	815.171883621876	-0.0896261579804773	0.0428011821447137	-2.09401127467567	0.0362589759027646	0.0683411552440763
C16orf58	1943.41418056288	0.0827466770254782	0.0375883741648493	2.20139016022828	0.0277084149926533	0.0540911220306768
C16orf59	78.3757255069624	-0.232220283489562	0.132574827082835	-1.75161671788918	0.0798397359493173	0.134867717115888
C16orf61	399.145735696937	-0.332796494859593	0.0627513161394025	-5.3034185628917	1.13653918485251e-07	9.75184908387202e-07
C16orf62	1785.80912820972	0.164170742684946	0.0366246886889147	4.48251571718167	7.37682077445884e-06	3.97071287998981e-05
C16orf63	532.820548429414	-0.235135919486586	0.0368534795512034	-6.38029088026528	1.76751934282234e-10	3.08240072950263e-09
C16orf68	180.084976292139	0.0113667669275056	0.0497420780438	0.228514114699765	0.81924658443818	0.915586763538538
C16orf7	924.452504798552	0.175236051415129	0.0658837696502391	2.6597757284596	0.00781926986231678	0.0180200999925175
C16orf70	485.489101311379	-0.26435627358908	0.0565066022703322	-4.67832541628282	2.89227277488251e-06	1.74706557901773e-05
C16orf71	29.4992949201638	-0.277064027070454	0.122220024506474	-2.26692825655406	0.023394608755629	0.0466060705947533
C16orf72	897.338151196631	0.0548298181985524	0.0389930929474141	1.40614180753744	0.159682019972637	0.243322586374945
C16orf73	1.41392911184304	-0.941603694280795	0.326195463277154	-2.88662412659233	0.00389399115153033	0.00982515184221744
C16orf74	20.1712014618098	-1.15817500970893	0.169943326453486	-6.81506613927512	9.42204079697686e-12	2.26926860539891e-10
C16orf75	69.9247298103965	-0.566149282323099	0.155810815600458	-3.63356856930178	0.00027952811642878	0.000982208170736303
C16orf78	0	NA	NA	NA	NA	NA
C16orf79	64.413404420282	-0.226843074417428	0.136954789734624	-1.65633545827042	0.0976539035816262	0.159931111463176
C16orf80	838.820105404673	-0.11810971911188	0.0496567372764294	-2.37852355168617	0.0173821264951056	0.0360775194693435
C16orf81	2.50224283641646	-0.257482825638411	0.239990287928287	-1.07288852336954	0.283321135930963	0.392780772703404
C16orf82	0.629818161125763	-0.730534742989329	0.651735028670175	-1.12090759411833	0.262327198035231	0.368686137360503
C16orf86	123.913247935375	0.278666804030241	0.0848665801230915	3.28358705660178	0.0010249498301848	0.00306802812502308
C16orf87	156.743245294369	0.129600524746976	0.0641277169328928	2.02097518741543	0.0432823337012872	0.0796915778544264
C16orf88	353.092091123538	0.102531166984056	0.0567346784900212	1.80720451252913	0.0707303976146388	0.121560996166988
C16orf89	162.976798474203	-1.16979767021172	0.180285606345656	-6.48858050247726	8.66488548919514e-11	1.63971512094945e-09
C16orf90	0.0349871652207089	-0.0886163702853998	2.66686299474652	-0.0332286924600049	0.973492217477256	0.999052814291159
C16orf91	228.271266197094	0.0161903169905697	0.057653366363289	0.280821711061072	0.778847150411103	0.88355841676154
C16orf92	3.15235406704354	0.393565162067923	0.220654404219281	1.78362704093958	0.0744842886212953	0.127120203135885
C16orf93	72.9787011750735	-0.54493246618649	0.113383751790613	-4.80608956381003	1.53910970925259e-06	9.95198320860751e-06
C17orf100	203.403194593944	0.341532485989661	0.0651560115461986	5.24176477173559	1.59048046727449e-07	1.31621276153567e-06
C17orf101	288.29767251299	0.134542078015577	0.0675842651367068	1.9907307972267	0.0465104909982341	0.084747776135844
C17orf102	41.6103871689909	0.308326815474629	0.180787139990112	1.70546873793951	0.088107037958759	0.146630248181946
C17orf103	354.780729026203	0.183145839064081	0.0543348917286167	3.37068563564697	0.000749813684523217	0.00232991591559753
C17orf104	21.6125675589088	-0.482703187006253	0.0918427871127376	-5.25575499373437	1.47418439246268e-07	1.23423056927395e-06
C17orf105	0	NA	NA	NA	NA	NA
C17orf106	172.673093037761	-0.0966049304468507	0.0661390047134317	-1.46063477769922	0.144115696850901	0.222708555900633
C17orf107	33.0114277260874	-0.73327478994644	0.204733521252925	-3.58160591123015	0.000341488647137406	0.00116623528794586
C17orf108	558.602343035512	-0.227263077457316	0.09008583416838	-2.52273933582651	0.0116444680425695	0.0254266695205255
C17orf28	654.679384376926	-0.566456457499846	0.136718151316027	-4.14324251788975	3.42429491296165e-05	0.000154516713991317
C17orf37	737.552744490618	-0.237124008832982	0.0599207119758033	-3.95729625056417	7.58028965682052e-05	0.000314126423747394
C17orf39	406.496387938332	0.0636964470457742	0.037237729781761	1.71053518619636	0.0871669526202736	0.145378480827535
C17orf42	124.1227307414	-0.014446979382139	0.0528981958369458	-0.273109113714777	0.784769341224009	0.888372463436861
C17orf44	19.670406884932	-0.499103256059535	0.0854527419118267	-5.84069328722685	5.19840331634215e-09	6.14154674026007e-08
C17orf46	0.472690234999132	0.078128956118925	0.41640441733753	0.187627587186701	0.851168598853068	0.940148579554949
C17orf47	1.72838227364171	0.441968739151917	0.184466566221079	2.39592869432083	0.0165783150901175	0.0345798763851242
C17orf48	130.808277234937	0.263932986713635	0.0608253114658071	4.33919663300047	1.43004526464417e-05	7.15207536028401e-05
C17orf49	866.751689671983	-0.07440254831445	0.0667585811118364	-1.11450164271479	0.265064040119144	0.3716084476915
C17orf50	2.40950482844042	0.318693407066687	0.210304701530881	1.51538888454136	0.129673950646695	0.203777866702453
C17orf51	935.8388937978	0.123087940016553	0.0874295587396219	1.40785269639901	0.159174692625754	0.242645113532126
C17orf53	39.4784245182908	-0.199369979910972	0.132363593604106	-1.50622973041424	0.132008209839966	0.206690315601113
C17orf54	0.0160138976787305	-0.032660179909075	2.90048782817136	-0.0112602368442504	0.991015820726465	0.999052814291159
C17orf55	2.57102409735432	-0.401249784988174	0.224907666312978	-1.78406450774249	0.0744131836954251	0.127042141922398
C17orf56	331.585934852241	0.065757959484089	0.0711547759934409	0.924153840216581	0.355406224750914	0.474431004050434
C17orf57	10.4662506584291	0.0804998229054984	0.158016669564296	0.509438802421688	0.610444683951856	0.733064277406328
C17orf58	206.216723957159	-0.18353587971356	0.0612038405887196	-2.99876409630717	0.00271077106960896	0.0071807029840073
C17orf59	283.91434554858	0.079363976405874	0.0651252322800008	1.21863636608089	0.222982239927958	0.32256589617637
C17orf60	15.0610807563904	-1.0239217597602	0.180887870494601	-5.66053299737843	1.50903568062839e-08	1.59044959473313e-07
C17orf61	409.009655048293	-0.0297785400068244	0.0786905973273543	-0.378425644463533	0.705114420645418	0.819969508465058
C17orf62	1213.47942199698	-0.0326321267385984	0.0591261381846625	-0.551906952500126	0.581012104752957	0.705561604038816
C17orf63	629.833421158213	0.0377662479757272	0.0465077042830354	0.812042833718266	0.416767053662233	0.539314921274127
[truncated: 18,502 more rows]

## Sheet: DEG
gene_name	baseMean	log2FoldChange	lfcSE	stat	pvalue	padj
A2LD1	31.0925594236055	-1.20387	0.133824336578757	-8.99586010733822	2.34389639680742e-19	4.04741e-17
ABAT	13053.1351750909	0.59387	0.0834458066741667	7.11683249265737	1.10435564679018e-12	3.40099e-11
ABCA10	6.17485811902892	-1.24071	0.201731896315446	-6.15029772617421	7.73376327481625e-10	1.1314e-08
ABCA13	7.25597377672054	-1.91488	0.278789701366728	-6.86856308402566	6.48517944998762e-12	1.63525e-10
ABCA4	7.60787503646106	-1.15115	0.204385889156769	-5.63225843180324	1.77864884286585e-08	1.84149e-07
ABCA5	167.554572305993	-1.08706	0.21309489866385	-5.10131720061012	3.3729770428637e-07	2.56442e-06
ABCA7	168.963000201109	-0.802926	0.154102989000475	-5.21032186242881	1.88513305955575e-07	1.52994e-06
ABCC3	45.0683380176947	-2.42637	0.284591084929469	-8.52580969633232	1.51744565581864e-17	1.53651e-15
ABCC8	1159.29236084205	1.02675	0.173017826754351	5.93435308922263	2.95006346841716e-09	3.70964e-08
ABHD15	140.392821954289	-0.620715	0.0938444102199739	-6.61429445701315	3.73327976661265e-11	7.69105e-10
ABI3	179.898927997598	-0.75605	0.134498415999966	-5.62125565687164	1.89574484536874e-08	1.94916e-07
ABTB2	552.448521087042	0.686258	0.146786946291899	4.67519767886746	2.93670603537954e-06	1.76879e-05
ACAA2	462.959582280796	-0.91333	0.122433266990806	-7.45981724883111	8.6642569576371e-14	3.49826e-12
ACACB	353.690001725123	-0.645957	0.148645278028396	-4.34562669206332	1.38878586015365e-05	6.96373e-05
ACADL	14.69219046424	-1.56997	0.265525777256131	-5.91269205446151	3.36561057734815e-09	4.17249e-08
ACADS	197.542914904077	-0.701895	0.140322625908251	-5.00200801102033	5.67362322412255e-07	4.08975e-06
ACAN	321.324815802772	1.4234	0.229183068863928	6.21073404306173	5.2737665492334e-10	8.12059e-09
ACAP1	12.5727166148486	-1.20024	0.16567002333274	-7.24473554917672	4.33283778277079e-13	1.47012e-11
ACCN2	4287.21678838581	0.791202	0.111033142424435	7.12581902459515	1.03463588789302e-12	3.2222e-11
ACCN4	3123.0813255696	0.905426	0.184818892355899	4.89899201117737	9.63295605320144e-07	6.53689e-06
ACOT4	21.9019715996814	-0.802078	0.183812240008392	-4.36357487756853	1.27954117074733e-05	6.47301e-05
ACSF2	235.969183787649	-0.601568	0.120001644578771	-5.01299912845932	5.35881396845993e-07	3.87582e-06
ACSL1	880.834127820477	-0.723954	0.108055844565972	-6.6998135935826	2.08685570914774e-11	4.58634e-10
ACSL6	1156.41816356743	0.684005	0.14858483387159	4.60346238689283	4.15524270097986e-06	2.4075e-05
ACTA2	876.371151554519	-0.937346	0.17799609661515	-5.26610554581695	1.39348188967593e-07	1.17378e-06
ACTG2	37.824888499743	-1.71747	0.317119532358595	-5.41583160452851	6.10044960451069e-08	5.5443e-07
ACTN1	1467.99732131469	-0.955469	0.147600155509829	-6.47335836689552	9.58482577092751e-11	1.79102e-09
ACTR3C	9.00347257764471	-0.880334	0.186275034759094	-4.72599273485386	2.28993835798416e-06	1.4222e-05
ACY3	97.2667313718024	-1.24004	0.283907741929209	-4.36775816681695	1.2552837391661e-05	6.36528e-05
ADAM12	72.349021017261	-0.93105	0.215348330441851	-4.32346279092898	1.53599054088938e-05	7.60913e-05
ADAM22	780.143129016203	0.699445	0.143132918790633	4.88667892402767	1.0255113035504e-06	6.89857e-06
ADAM28	133.692200467323	-0.712207	0.161209686258502	-4.41789303649549	9.96677203204847e-06	5.19282e-05
ADAM29	7.99752288416271	1.25001	0.20061269391931	6.23095658879834	4.63595571414533e-10	7.28346e-09
ADAM33	51.1012926192051	-0.962563	0.185068694999196	-5.20111084303124	1.98100906209746e-07	1.59836e-06
ADAM6	124.855495639262	-2.96744	0.303808695263956	-9.76745854926424	1.55298789661577e-22	5.77592e-20
ADAMTS14	81.4409618499764	-0.962454	0.218877063614407	-4.39723391888621	1.09639165481346e-05	5.65144e-05
ADAMTS16	18.5602886519703	-0.884278	0.207038828664262	-4.2710727083339	1.94534966142033e-05	9.37997e-05
ADAMTS3	37.465530197928	-1.55938	0.230134354318096	-6.77594010944713	1.23599875717268e-11	2.87212e-10
ADAMTS4	525.556472487027	-1.06374	0.218431071538538	-4.86989671758889	1.1165659533633e-06	7.44121e-06
ADAMTS6	213.078946866709	0.626253	0.142805375033315	4.38536228535666	1.1579289724997e-05	5.93385e-05
ADAMTS7	59.1348405801948	-1.28571	0.211974857769538	-6.0653774808399	1.31644092220217e-09	1.81727e-08
ADAMTSL3	60.7519751623269	-1.20172	0.181069887961884	-6.63679802876674	3.20570416256097e-11	6.73895e-10
ADAMTSL4	44.4060177782131	-0.783083	0.153213374874617	-5.11106129134534	3.20354020765466e-07	2.4479e-06
ADAP2	196.534629849881	-0.690612	0.11550867396927	-5.97887910353095	2.24678219308344e-09	2.92218e-08
ADIG	1.49707634921678	-1.92165	0.435470812363488	-4.41281439187135	1.0203546787689e-05	5.29763e-05
ADM2	5.51246013043408	-1.05988	0.233890546785642	-4.53154116070637	5.85549248623465e-06	3.24021e-05
ADORA3	471.337841475283	-0.917394	0.149230841127198	-6.14748121861333	7.87230181226708e-10	1.14906e-08
ADPRH	86.5445024798002	-0.769044	0.103979426456434	-7.3961190050725	1.40222349653285e-13	5.3701e-12
ADRA2A	104.843988512666	-1.06314	0.191531940592498	-5.5507270009246	2.84484044168268e-08	2.81284e-07
ADRA2B	15.8040412295688	-0.942267	0.1715234149053	-5.49351834414181	3.94004159946922e-08	3.78354e-07
ADRA2C	39.6393501049801	-0.832334	0.16266935749264	-5.11672139586287	3.10892313863693e-07	2.38882e-06
ADSSL1	80.2899308567758	-0.732788	0.156565681668434	-4.68038869704347	2.86331528181964e-06	1.7316e-05
AEBP1	2113.20822201895	-0.974822	0.223486160331001	-4.36189041879847	1.28943451736179e-05	6.51965e-05
AFAP1L2	1365.45781132492	0.77947	0.170615251538179	4.5685818351546	4.91035345371561e-06	2.7833e-05
AGBL2	5.69032884898458	-1.55098	0.265641670550174	-5.83861216793504	5.26374396532307e-09	6.21115e-08
AGMAT	20.0134374768963	-0.961887	0.189325122043005	-5.08060905694655	3.76226671479559e-07	2.83011e-06
AGPAT2	171.721748537711	-0.853118	0.121026404252714	-7.04902590155077	1.80174614379637e-12	5.19311e-11
AGTRAP	335.121931641735	-0.884739	0.106250171569098	-8.32693832544703	8.29599359385428e-17	7.35984e-15
AHCYL1	11047.7443536404	-0.620326	0.131372412614309	-4.72189036594092	2.33662634326402e-06	1.44794e-05
AHNAK2	314.3084958902	-1.02097	0.209072484085445	-4.88334521417771	1.04301030969989e-06	6.99971e-06
AHSG	7.50648493353392	0.879292	0.190213552875897	4.62265613850734	3.78857448638573e-06	2.21563e-05
AIF1	431.164455478378	-0.866417	0.141699515660423	-6.11446616911915	9.68807190852369e-10	1.38278e-08
AIM1	33.4754389680298	-1.30938	0.169923897540371	-7.70567953040198	1.30148863809327e-14	6.53787e-13
AK2	829.735303568387	-0.596226	0.0712841786906151	-8.36406729594871	6.05923303655272e-17	5.45049e-15
AK3L1	187.657699002448	-0.818749	0.145831028256106	-5.61436897960478	1.97280843129831e-08	2.02087e-07
AK7	10.5509062144407	-1.96186	0.281729720091899	-6.96361570733235	3.31648525260643e-12	8.98331e-11
AKIRIN1	1359.63792691511	-0.624345	0.0676807970295388	-9.22484114350378	2.83981528771025e-20	5.96979e-18
AKR1C2	104.188733341471	-0.910029	0.207954673005009	-4.37609279701073	1.20825591274804e-05	6.15911e-05
AKR7A3	20.3432479639623	-0.795371	0.135647564135659	-5.86351082100275	4.53181299841631e-09	5.44381e-08
ALDH1A2	46.3524812838572	-0.932383	0.165377751934541	-5.63789698264755	1.72139430872797e-08	1.78988e-07
ALDH1A3	30.2436242800967	-1.95831	0.30380493750582	-6.44593818195687	1.14887486092161e-10	2.09813e-09
ALDH1L2	647.323746313753	0.683769	0.117976600190158	5.79579975092875	6.7996359646623e-09	7.75383e-08
ALDH3A1	4.7904564945988	-1.45492	0.252699170698485	-5.75753447055649	8.53513442256819e-09	9.48675e-08
ALDH3B1	180.940248001409	-0.5959	0.128883225933289	-4.62356516542917	3.77200167824697e-06	2.20795e-05
ALDH4A1	1782.43742727198	-0.896316	0.128144052594519	-6.99459470681432	2.66026830074882e-12	7.33946e-11
ALG14	119.302308620913	-0.76212	0.0671277473349937	-11.3532843117022	7.14282902323526e-30	1.38142e-26
ALK	184.080498657659	0.911251	0.177400301756839	5.13669300041509	2.79615173345826e-07	2.17879e-06
ALMS1P	8.34200610045818	0.877289	0.160426390952419	5.46848091992401	4.53908915976597e-08	4.28016e-07
ALOX12B	20.6667050646164	0.99564	0.227853625541858	4.36964912590213	1.24446331813624e-05	6.32141e-05
ALOX5	143.816521458643	-1.05124	0.160316846179753	-6.55725933371088	5.48056576877234e-11	1.08824e-09
ALOX5AP	222.746656292346	-1.39382	0.183564861120612	-7.59307267180005	3.1240721620911e-14	1.40511e-12
ALPK1	99.5408329027114	-0.622752	0.131244984991405	-4.74495771887639	2.08549892177049e-06	1.30741e-05
AMH	167.464300092118	0.813456	0.190979587553517	4.25938693060992	2.04988359565214e-05	9.81992e-05
AMIGO2	76.5011893926295	-1.55638	0.184621669240723	-8.43011778686154	3.45317463096881e-17	3.28987e-15
AMPD3	286.318988991101	-0.797701	0.15175871890497	-5.2563743444908	1.46923079880669e-07	1.23119e-06
AMZ1	381.397851839193	0.932649	0.147992302117515	6.3020134891566	2.93803590271961e-10	4.85867e-09
ANG	23.9423622929294	-1.13926	0.140985421512638	-8.08069601149681	6.43981572267657e-16	4.66465e-14
ANGPT1	92.1829465995493	-1.01791	0.189490725101952	-5.37179707081434	7.7955809603776e-08	6.93817e-07
ANGPTL2	6028.89505143182	0.787885	0.154141919850193	5.11142515858799	3.19737492127106e-07	2.44416e-06
ANGPTL7	1.5230005971755	-1.89667	0.405203602933824	-4.68079044101087	2.85770938134729e-06	1.72919e-05
ANK1	477.35829060957	0.726226	0.149918362366664	4.84414023303128	1.27161100550263e-06	8.35926e-06
ANKK1	1.4298802156562	-1.89298	0.405261731870993	-4.67099507565	2.99744125847748e-06	1.80201e-05
ANKRD35	133.991452505038	-1.38757	0.205496546266542	-6.75230304752758	1.45516527593892e-11	3.31483e-10
ANKRD45	50.7324830247227	-1.07694	0.171491678135713	-6.2798528726593	3.38893578227035e-10	5.517e-09
ANKRD5	18.5061145558383	-1.01232	0.182653665740452	-5.54231948138623	2.98491061126269e-08	2.93334e-07
ANKRD55	58.8917258274585	1.17848	0.242677811263128	4.85613086556624	1.19701608372259e-06	7.92547e-06
ANKRD58	11.1164856557418	-0.804694	0.160091990794854	-5.02644892601689	4.99645473540328e-07	3.64097e-06
ANKRD9	64.0255847591447	-0.65629	0.152161368435497	-4.31312096230707	1.60965990966678e-05	7.92738e-05
ANO6	1047.3407996043	-0.618997	0.10256814655467	-6.0349834066731	1.5897902285171e-09	2.15917e-08
ANO8	1251.13738014431	0.695729	0.0987941543622883	7.04220500754204	1.8922114151762e-12	5.42154e-11
ANO9	0.735428106141748	-2.13617	0.480888802463281	-4.44213609293253	8.90701921073714e-06	4.68867e-05
ANUBL1	66.6824198354919	-0.660686	0.144346610658045	-4.5770770553811	4.71517814222062e-06	2.69081e-05
ANXA1	773.451672668445	-2.37611	0.211327109034525	-11.2437437035588	2.48610905449633e-29	4.00678e-26
ANXA11	955.081421624772	-0.869656	0.126282419503144	-6.8865939017441	5.71440459991816e-12	1.45417e-10
ANXA13	3.05598069714326	-1.35022	0.305465088872386	-4.42019657176052	9.86111589552379e-06	5.14609e-05
ANXA2	846.269508247698	-1.53895	0.166599081341341	-9.23743145110123	2.52485225704248e-20	5.54894e-18
ANXA2P1	5.07168211978033	-1.0769	0.179821811698642	-5.98868448536088	2.11545090693213e-09	2.77377e-08
ANXA2P2	279.719447390767	-1.77794	0.18327292337831	-9.70107404223088	2.98341324572544e-22	1.03034e-19
AOX1	15.4066528712418	-1.57108	0.253211340134449	-6.20463168741161	5.482514888474e-10	8.36213e-09
AP2S1	841.262193800143	-0.608296	0.0823631930930881	-7.38553442845256	1.51842238637769e-13	5.78077e-12
APBB1IP	348.579092530332	-0.851638	0.158168412854944	-5.3843776491739	7.26957321956064e-08	6.49993e-07
APC2	10276.9670182219	0.603128	0.0826253600866991	7.29954980154226	2.88732181408261e-13	1.02838e-11
APITD1	122.437169735882	-0.808762	0.0800149108449207	-10.1076461657384	5.10971562493024e-24	2.53389e-21
APLP1	7691.21054133683	-0.667777	0.13470510986914	-4.95732473979695	7.1470463174434e-07	4.98823e-06
APOB	4.4402660081481	-1.68659	0.276200896791153	-6.10639227641604	1.01908361537427e-09	1.44389e-08
APOBEC3C	57.3125117526036	-0.684508	0.142757313274483	-4.79490848599685	1.62749110200197e-06	1.04605e-05
APOBEC3D	7.45713961372196	-0.829285	0.15872819949626	-5.22455826445218	1.7457135388372e-07	1.42999e-06
APOBEC3F	23.7671509025803	-0.938805	0.13294836893523	-7.06142298087022	1.64806083918021e-12	4.80023e-11
APOBEC3G	54.1821277047274	-1.05878	0.136896310551681	-7.73414158761281	1.04103124033943e-14	5.31228e-13
APOC2	342.405897384039	-1.10179	0.18139501860445	-6.07397665284293	1.24780877917977e-09	1.73242e-08
APOL1	198.774081613086	-1.00179	0.14520163157322	-6.89928328656157	5.22655538394497e-12	1.33883e-10
APOL4	107.610429152036	-1.77844	0.23322469694227	-7.6254305329819	2.4322126099034e-14	1.13347e-12
AQP1	6457.70202216758	-1.84459	0.235277919744343	-7.84004732684336	4.50376652328776e-15	2.51017e-13
AQP3	35.3216846411862	-1.09443	0.223350424034201	-4.90004135773535	9.58164833834771e-07	6.50664e-06
AQP5	13.1646442464845	-3.83358	0.414339988594	-9.25226794676423	2.19778946392359e-20	4.94247e-18
AQP9	21.929445400094	-1.21178	0.278652925298128	-4.34871720528073	1.36936152971965e-05	6.88061e-05
ARAP3	235.432757617872	-0.609939	0.124634230580593	-4.89382814533872	9.88932035580106e-07	6.68272e-06
ARC	944.343356767057	-1.08344	0.211930606485726	-5.11222920294634	3.18379196796733e-07	2.43667e-06
ARHGAP15	26.4775915072104	-1.05103	0.185093398341249	-5.67837191716236	1.35982798312352e-08	1.44819e-07
ARHGAP18	198.104477279953	-0.810722	0.137950957454021	-5.87688708133312	4.18053161314157e-09	5.06906e-08
ARHGAP25	155.925695403005	-0.670944	0.107616593667194	-6.23457530883721	4.53005363088208e-10	7.1461e-09
ARHGAP30	233.29978726106	-0.60962	0.112068387633455	-5.43971454627142	5.33660079130918e-08	4.92179e-07
ARHGAP4	324.718774617487	-0.628331	0.115852688507717	-5.42353534266183	5.84316554686839e-08	5.34059e-07
ARHGAP6	137.640548680098	-0.806926	0.148417964767239	-5.43684859002068	5.42311840570566e-08	4.98731e-07
ARHGAP9	85.1436048699725	-0.820404	0.126212868120035	-6.50015736143321	8.02360375802885e-11	1.52733e-09
ARHGDIB	981.356333118928	-0.773818	0.113055373018792	-6.84459349999206	7.66933330595238e-12	1.89607e-10
ARHGEF16	19.8457630810033	-0.984043	0.203076062660234	-4.84568670076441	1.26174493506366e-06	8.3057e-06
ARHGEF37	635.327108878494	-0.586501	0.129072816897859	-4.54395635397351	5.52080938532678e-06	3.08146e-05
ARHGEF5	9.16794191643404	-0.791886	0.15222766649725	-5.20198801854798	1.97167940072536e-07	1.59334e-06
ARL10	162.546099848048	0.76661	0.111708561312974	6.86259007706082	6.76230701766501e-12	1.69408e-10
ARL11	23.7369244289749	-0.808615	0.140547879816003	-5.75330391592661	8.75159457961696e-09	9.70504e-08
ARL9	3.21194619803555	-2.1677	0.429913348983087	-5.04218440644248	4.60247425937833e-07	3.39033e-06
ARMC2	36.2215901101548	-0.708879	0.127511399355891	-5.5593354153878	2.7080382710821e-08	2.68858e-07
ARMC3	14.7879080912612	-1.2764	0.283161985983176	-4.50767937055631	6.55405173951908e-06	3.57662e-05
ARMC4	22.1906292642449	-0.932356	0.192754169068292	-4.83701886035477	1.31800926409867e-06	8.63158e-06
ARPC1B	705.36062673602	-0.869175	0.117884400124881	-7.37311114269405	1.66691404569482e-13	6.25983e-12
ARPM1	13.7325923511207	-1.07708	0.188438338877644	-5.71584684783987	1.0915901987409e-08	1.18803e-07
ARSI	32.5111807707935	-1.03488	0.1725187392148	-5.99865863367823	1.98954102342906e-09	2.62647e-08
ARTN	7.85426359618354	-1.03596	0.176118140642222	-5.88218124947528	4.04894588683908e-09	4.91876e-08
ARX	95.4030388999176	-0.989571	0.23194101761827	-4.26647883104516	1.98582327977014e-05	9.55606e-05
ASAM	14.1989167262804	-1.14124	0.241858733970492	-4.71861788024947	2.37452361237008e-06	1.46861e-05
ASAP3	768.141149033458	-0.807748	0.108885682262927	-7.41831550634031	1.18619262286367e-13	4.61589e-12
ASB14	17.2874625986423	0.714156	0.09162805069807	7.7940736136201	6.48827154012672e-15	3.4379e-13
ASB5	8.19309674722408	-1.6986	0.284955124891107	-5.96094172807538	2.50788394538515e-09	3.2249e-08
ASCL2	6.08086886291693	-1.39032	0.182659269586917	-7.61152812119516	2.70873947399509e-14	1.2414e-12
ASF1B	94.1908567666443	-1.03161	0.21098308703965	-4.88954416999225	1.01069743232968e-06	6.81314e-06
ASGR2	4.14520678584342	-1.47033	0.245864066431522	-5.98024489805925	2.22802396182981e-09	2.90168e-08
ASPM	105.820424318843	-1.18146	0.263555953515149	-4.48277449096305	7.36787783204474e-06	3.967e-05
ASPN	21.2489228631362	-1.51049	0.206684208516928	-7.3081874740329	2.70769845645076e-13	9.67965e-12
ASS1	329.358338213766	-1.13085	0.190983673448672	-5.92120194982597	3.19597103628854e-09	3.98775e-08
ATAD3C	27.2453758092893	-1.05615	0.184762422529274	-5.7162409891275	1.08906261267938e-08	1.18595e-07
ATCAY	7499.05891036573	0.924047	0.15531290704673	5.94958056517718	2.68830493460499e-09	3.4318e-08
ATF3	398.696502906441	-0.906419	0.206185381011618	-4.39613683563292	1.10194482488364e-05	5.67313e-05
ATF7IP2	27.1454013498362	-1.02193	0.155431434458121	-6.5747962865295	4.87198240976371e-11	9.8048e-10
ATG4C	217.797870767422	-0.680638	0.0854781432238268	-7.96271647567388	1.68302807281569e-15	1.05971e-13
ATP1B1	4605.25869044745	-0.798827	0.1765485777927	-4.52468427182626	6.04857330491345e-06	3.33085e-05
ATP2A3	59.0212331783421	-1.15777	0.157086345258364	-7.37026436188411	1.70290010151808e-13	6.38258e-12
ATP6V0B	1735.6885292237	-0.623881	0.0715394727239064	-8.72079667162659	2.76251123941732e-18	3.40898e-16
ATP8B1	39.2655293052188	-0.754544	0.158202889536082	-4.76947097661833	1.84710352014223e-06	1.17548e-05
ATP8B4	94.2342404009186	-0.712089	0.157826249322322	-4.51185399119696	6.42634213406351e-06	3.51585e-05
AVIL	37.9962819311325	-0.777616	0.149319412350344	-5.20773603900658	1.91158591927598e-07	1.54816e-06
B3GNT2	218.327290300439	-0.593292	0.0869089710891491	-6.82658537995124	8.69595501745295e-12	2.12348e-10
B3GNT5	142.811358765288	-1.13986	0.153368675803271	-7.43218422008421	1.06818887486401e-13	4.21608e-12
B3GNT7	44.9676570517353	-1.17151	0.153609622256395	-7.62656524206033	2.4109094071618e-14	1.12626e-12
B3GNT8	5.4324697340232	-1.09319	0.185504353309328	-5.89307886693501	3.79065371603035e-09	4.63995e-08
B4GALT1	397.322688074593	-0.730356	0.118611745610609	-6.15753743935593	7.38847802738306e-10	1.08912e-08
B9D2	63.2523016562155	-0.906269	0.109601119276808	-8.26879391911333	1.35320943089978e-16	1.13787e-14
BACE2	133.711525079736	-0.796691	0.12575797469173	-6.33511515786664	2.37164069841e-10	4.03408e-09
BAIAP2	1492.63425436864	-0.591738	0.11126313258631	-5.31836360658386	1.04704665722551e-07	9.0482e-07
BAIAP3	1393.36335856784	-0.963509	0.180380056056882	-5.34154879336703	9.21558030790481e-08	8.04647e-07
BANK1	9.11412896138623	-1.88264	0.24914080906822	-7.55651076584521	4.14025646826505e-14	1.80344e-12
BATF	7.39849223675017	-1.23777	0.247984859046599	-4.99132963285108	5.9965060443539e-07	4.28892e-06
BATF3	34.2771873717591	-1.20177	0.164858489536077	-7.28967760712671	3.10697601183783e-13	1.09552e-11
BCAR3	346.673932023427	-0.616044	0.124182841298877	-4.96078559009439	7.02086545204578e-07	4.91257e-06
BCAS2	582.89983080754	-0.587871	0.0586287808185302	-10.0269952474474	1.15992773690085e-23	5.34119e-21
BCAS4	350.811982593002	-0.624366	0.095624257714418	-6.52937024502814	6.60468006784041e-11	1.28752e-09
BCAT1	439.564828241732	-0.926274	0.171945190141686	-5.38702858950697	7.16320434874206e-08	6.42437e-07
BCHE	1851.2392107478	0.610007	0.118965397496333	5.12759671869408	2.93464226417231e-07	2.2702e-06
BCL2L12	38.4213321332927	-1.26523	0.154662238683205	-8.18062833723061	2.8236757491208e-16	2.16706e-14
BCO2	46.0250148223064	-0.654324	0.143664384656909	-4.55453002399253	5.2502826018359e-06	2.94406e-05
BDKRB2	23.3575521587961	-1.41976	0.23752762756295	-5.97723359635492	2.2695864720474e-09	2.94392e-08
BEST4	10.8875850627746	-1.16638	0.216923803483196	-5.37690303978932	7.57779545352595e-08	6.75367e-07
BFSP1	20.7537656400639	-1.087	0.205100083364851	-5.29983319791332	1.15908525111182e-07	9.92329e-07
BHLHE22	40.2576509414103	-1.37618	0.289981578090537	-4.7457349834622	2.07750573690816e-06	1.30324e-05
BHLHE41	1340.08917312781	-0.742336	0.132016628851806	-5.6230456404516	1.87619805756763e-08	1.93112e-07
BHMT2	37.633809696804	-0.744576	0.172228357483719	-4.3231876981327	1.53790783866443e-05	7.61473e-05
BIN2	126.560138251086	-0.811989	0.137854397247896	-5.89018999040935	3.85751872312181e-09	4.70987e-08
BIRC3	40.9199738810659	-0.943096	0.173078086519509	-5.44896469998418	5.06638666563943e-08	4.69722e-07
BLK	9.10034693758823	2.17513	0.304409320796915	7.14539675827794	8.97363154264223e-13	2.83522e-11
BLNK	67.5536802372997	-1.02045	0.181690250330012	-5.61644814444249	1.94922711952185e-08	1.99884e-07
BLVRB	393.924140140304	-0.872827	0.121221749312335	-7.20025344754234	6.0100739754336e-13	1.96343e-11
BMP2	1810.2879877409	0.931464	0.149002657737651	6.25132755894946	4.06978290202408e-10	6.49955e-09
BMS1P5	80.5061112240021	0.718599	0.115812059110656	6.20487401542816	5.47407374598789e-10	8.35585e-09
BRWD3	216.911183956844	0.772012	0.132900459511288	5.80895027953893	6.28657539340636e-09	7.22844e-08
BSCL2	2424.23802569901	-0.677835	0.127831904380494	-5.30255198377975	1.14194933512307e-07	9.79392e-07
BST1	22.1317022943732	-0.931787	0.141091610214914	-6.60412726165793	3.99865924711589e-11	8.19217e-10
BST2	549.843516630051	-1.18538	0.145348435835614	-8.15546595471423	3.47836205326131e-16	2.6381e-14
BTBD17	969.096021524105	0.859693	0.180349138199905	4.76682565190411	1.87151125763502e-06	1.18867e-05
BTK	103.323896333938	-0.841045	0.143365167176514	-5.86645173863557	4.45219776362301e-09	5.36149e-08
BVES	150.624719420619	-0.926594	0.164295960280825	-5.63978311182943	1.70264490231233e-08	1.77134e-07
C10orf10	625.423615405667	-0.749153	0.139638907574393	-5.36492937407403	8.09808995284719e-08	7.17111e-07
C10orf105	91.3281299599029	-2.2693	0.22671061315254	-10.0096911554972	1.38183242309024e-23	6.07378e-21
C10orf107	49.5901932169755	-0.869584	0.197115004132659	-4.4115569491607	1.02629952222195e-05	5.32191e-05
C10orf11	13.6131965105618	-1.02299	0.159194525253733	-6.42601658539784	1.30991116898989e-10	2.34789e-09
C10orf114	47.7822861283555	-1.08695	0.166559627495465	-6.52586919779033	6.76083027995383e-11	1.31148e-09
C10orf116	352.33878166095	-0.692109	0.153688831583339	-4.50331398474381	6.69019271680207e-06	3.63962e-05
C10orf125	35.3819810080597	-0.990232	0.142310851355417	-6.95822921553029	3.44576267752888e-12	9.23006e-11
C10orf140	33.5256919192777	-1.32944	0.209835503233147	-6.33562966309225	2.36373930873568e-10	4.02708e-09
C10orf35	151.475853927433	-1.02659	0.216336291013557	-4.74532074572165	2.08176197964701e-06	1.30549e-05
C10orf55	2.1059696310043	-1.84314	0.305019592885136	-6.04269564010328	1.51560397937224e-09	2.07004e-08
C10orf67	1.54182037464882	-1.82323	0.33982966407529	-5.36511685651824	8.08968280019846e-08	7.16695e-07
C10orf79	38.4345302474962	-1.91965	0.215035446968646	-8.92713799358585	4.37171940082512e-19	6.71024e-17
C10orf93	13.396435521861	-0.857303	0.168879844288166	-5.07640770704904	3.84637496956027e-07	2.88889e-06
C11orf21	3.29464543102906	-1.02154	0.209681891127208	-4.87187720098387	1.10542871848538e-06	7.37461e-06
C11orf35	3.25768186490004	-1.04409	0.227454770201253	-4.59030653050371	4.42595537811124e-06	2.54529e-05
C11orf45	22.3163493760284	-0.873981	0.148477438596643	-5.88629098040603	3.94958700363013e-09	4.81014e-08
C11orf63	26.9496903515421	-2.13591	0.254182863773377	-8.40306342615362	4.34979597434673e-17	4.02512e-15
C12orf39	41.7426060972141	-1.4322	0.237631486821151	-6.02697146550034	1.67060483716403e-09	2.26257e-08
C12orf59	28.3434362068782	-0.887885	0.179627069565567	-4.94293792611703	7.69539915980205e-07	5.32674e-06
C12orf63	6.57292592642678	-1.20939	0.269746299374594	-4.48341932580993	7.3456381194835e-06	3.95833e-05
C12orf75	119.56157532359	-1.05842	0.137307179071687	-7.70842760826739	1.27377339167148e-14	6.41531e-13
C13orf18	87.6844820963701	-1.12291	0.167801963248692	-6.69189788176766	2.20294581926487e-11	4.82503e-10
C13orf26	8.40551293545106	-1.98429	0.357919939691654	-5.54393774942795	2.95744013936147e-08	2.91001e-07
C13orf29	19.0199189890137	-0.761468	0.151810066038542	-5.01592794280547	5.27781079486907e-07	3.82439e-06
C13orf31	131.151494589111	-0.774767	0.176145236512634	-4.39845515800666	1.09024146481309e-05	5.62574e-05
C13orf33	8.81703613300817	-1.4252	0.232459395119596	-6.13094840881271	8.73567325739506e-10	1.25612e-08
C14orf169	87.1945274730253	-0.909626	0.130244129452948	-6.9840041746284	2.86883532464994e-12	7.88115e-11
C14orf174	22.0206382865448	-0.84251	0.154621860106528	-5.44884454146875	5.06981017166526e-08	4.69814e-07
C14orf50	6.07442069433139	-1.33294	0.20267501246888	-6.57673826800214	4.80880148103685e-11	9.7181e-10
C14orf86	8.67744788874485	-1.0719	0.248569684642339	-4.31227788240992	1.61581176017028e-05	7.94958e-05
C15orf26	1.95942818495158	-1.84572	0.360656870161622	-5.11767128515794	3.09331103919579e-07	2.37966e-06
C15orf27	39.4418171298133	-0.839907	0.18800995690134	-4.46735277748409	7.91934756414003e-06	4.21464e-05
C15orf39	720.193268208388	0.652235	0.108034891808305	6.03726110872649	1.56751972139717e-09	2.13342e-08
C15orf56	2.58062998974454	-1.59041	0.267939083227463	-5.93571562943748	2.92566521688694e-09	3.68135e-08
C16orf54	10.7262332167834	-0.981182	0.154003053720036	-6.37118437215264	1.8757398386467e-10	3.2419e-09
C16orf74	20.1712014618098	-1.15818	0.169943326453486	-6.81506613927512	9.42204079697686e-12	2.26927e-10
C16orf89	162.976798474203	-1.1698	0.180285606345656	-6.48858050247726	8.66488548919514e-11	1.63972e-09
C17orf60	15.0610807563904	-1.02392	0.180887870494601	-5.66053299737843	1.50903568062839e-08	1.59045e-07
C17orf72	37.1956710751452	-1.14023	0.177173325011211	-6.43567156878378	1.22928584922987e-10	2.22607e-09
C17orf91	75.1957194973506	-0.760081	0.132684222295094	-5.72849235149411	1.01327120677485e-08	1.11155e-07
C19orf38	30.4099067105566	-0.624942	0.125688626400426	-4.97214434237981	6.62163734055136e-07	4.67552e-06
C19orf40	13.5767918763567	-0.668581	0.111749269448619	-5.98286239384094	2.19249989324228e-09	2.86894e-08
C19orf51	17.9908783827171	-2.27093	0.259593184877655	-8.7480272174954	2.17114906156041e-18	2.83716e-16
C19orf55	41.8673546856462	-0.769869	0.109762990784725	-7.01392021852788	2.31731568615313e-12	6.46708e-11
C19orf76	18.9665048709505	-0.598999	0.115641890617169	-5.17977371595987	2.22155219199895e-07	1.77101e-06
C19orf77	12.2650499085655	-1.42703	0.263632955558654	-5.4129345187381	6.20001679090358e-08	5.62422e-07
C1orf106	342.851485090874	0.665042	0.143489778240119	4.63476914590179	3.57336033730823e-06	2.10569e-05
C1orf110	1.80313053150117	-2.42601	0.461853839020254	-5.25276906605466	1.4982935059561e-07	1.25171e-06
C1orf122	1007.74601060823	-0.656942	0.10121023120758	-6.49086905258814	8.53426340811589e-11	1.61658e-09
C1orf128	1434.16035808939	-0.673875	0.0841753894963887	-8.00560255828183	1.18883104329137e-15	7.7939e-14
C1orf130	8.87636711659137	-1.58792	0.271452290357624	-5.84973534971439	4.92355769796906e-09	5.86701e-08
C1orf133	17.2889342353554	-1.20473	0.189225689838334	-6.36661947372759	1.93239790343387e-10	3.33386e-09
C1orf135	19.7908420296986	-1.0323	0.150886159453644	-6.84158984647236	7.83190588690008e-12	1.92954e-10
C1orf151	623.796853482045	-0.685024	0.0765784557005052	-8.94538288161305	3.7066253137555e-19	5.93195e-17
C1orf158	3.16536337169111	-2.48323	0.530856681687288	-4.67777420408115	2.90005629764908e-06	1.75108e-05
C1orf162	121.746324691367	-0.929338	0.155044713784531	-5.99399709702811	2.04745028595195e-09	2.69372e-08
C1orf187	34.1235375199592	-0.916533	0.201417035158612	-4.55042366740708	5.35380070512041e-06	2.99602e-05
C1orf192	113.763967680405	-1.19999	0.186662459422026	-6.42865239521633	1.28740144512856e-10	2.31613e-09
C1orf194	48.2519179833069	-2.38961	0.224163359441938	-10.6601165264012	1.56401361921529e-26	1.592e-23
C1orf201	123.548150682589	-1.33051	0.216085037588015	-6.15735041735101	7.39720547335994e-10	1.08958e-08
C1orf220	15.5224174610379	0.788456	0.135502043834966	5.81877514154403	5.92804167507534e-09	6.8734e-08
C1orf228	20.1040948564261	-0.800881	0.15487061662659	-5.17129003184788	2.32483400905043e-07	1.84196e-06
C1orf38	274.189920308978	-0.782915	0.140594431107537	-5.56860409759585	2.56788198765502e-08	2.56258e-07
C1orf53	22.2997614525379	-0.624719	0.136578409365208	-4.57407076731291	4.78338154933841e-06	2.7233e-05
C1orf54	127.481729107183	-0.587128	0.124982126064798	-4.69769969120734	2.63107899945181e-06	1.60622e-05
C1orf59	86.3550391280721	-1.03865	0.174857530138104	-5.93995296159819	2.85103869863335e-09	3.59916e-08
C1orf85	324.207597499803	-0.749796	0.111473015135928	-6.72625390475305	1.74086685053265e-11	3.87438e-10
C1orf87	1.4620736123117	-2.8868	0.445065863963009	-6.48623766331769	8.80063064485516e-11	1.66053e-09
C1orf88	191.231590634911	-1.86505	0.183153583180472	-10.1829966955662	2.3617409177334e-24	1.23449e-21
C1QA	1673.65063586351	-1.00707	0.154556791993092	-6.51587447297467	7.22673920581797e-11	1.38932e-09
C1QB	2313.76151798397	-0.966423	0.152913308139596	-6.32007132016397	2.61442612298307e-10	4.40444e-09
C1QC	2110.25179647783	-0.861578	0.144123331215055	-5.97806112456985	2.25809012408338e-09	2.93097e-08
C1QL4	90.995837778808	-1.13313	0.258246628211556	-4.38779189196928	1.14507261188758e-05	5.87419e-05
C1R	1038.23277875628	-1.38185	0.174354050765559	-7.92555548765884	2.27128700510516e-15	1.38134e-13
C1RL	152.705513800011	-0.99894	0.134288433403537	-7.43876666433031	1.01629651986516e-13	4.0277e-12
C1S	1036.64294716797	-1.00041	0.168396591525622	-5.94081607732944	2.8360666515379e-09	3.58494e-08
C2	194.629604774215	-1.30824	0.170801584506584	-7.65938645848882	1.86823432550605e-14	8.9214e-13
C20orf134	3.52108037440485	-1.05012	0.186023462219635	-5.64510723264951	1.65078324974661e-08	1.72201e-07
C20orf195	0.987028225375268	-2.24421	0.454663407628543	-4.93597035773512	7.97532208891085e-07	5.50867e-06
C20orf197	3.83831553830599	-1.10211	0.218981635973316	-5.03289854704863	4.83118831552625e-07	3.53653e-06
C20orf26	26.0278897140616	-1.21353	0.192777198895861	-6.29496649271891	3.074662685979e-10	5.06076e-09
C20orf30	1565.68975845963	-0.617149	0.041347098098063	-14.9260574314578	2.23071077136134e-50	4.31419e-46
C21orf121	2.36949719057267	-1.44313	0.317966343948165	-4.53861505924383	5.66248962422875e-06	3.15144e-05
C21orf125	18.5525435724841	1.78996	0.189139556558766	9.46369039107245	2.9726253220573e-21	8.09726e-19
C21orf63	134.404589241716	-1.05366	0.120212770034948	-8.7649794184874	1.86810785407522e-18	2.45777e-16
C21orf7	47.6411671970228	-1.83143	0.19109359093049	-9.58392723354414	9.34234276764053e-22	2.79622e-19
C21orf84	0.725079539174893	1.58373	0.371824039131939	4.25934134157175	2.05030169119942e-05	9.81992e-05
C21orf88	17.8320404957629	-1.27947	0.147441838656065	-8.67780723598561	4.03472124587693e-18	4.75802e-16
C22orf36	425.231170400705	0.607817	0.0979926342559532	6.20267914469956	5.55099393096063e-10	8.43995e-09
C2CD2	463.457497710098	-0.59088	0.0966079603735514	-6.11626886507334	9.57916560979309e-10	1.36825e-08
C2orf27A	180.483619670245	0.6707	0.151872543006953	4.41620112770061	1.00450625350982e-05	5.22938e-05
C2orf39	19.6095917805792	-2.96936	0.42222902257447	-7.03259196553225	2.02731591989467e-12	5.73144e-11
C2orf40	39.5894966326413	-0.922937	0.184136355519716	-5.01224937347303	5.37974211781686e-07	3.8895e-06
C2orf50	12.6063556389042	-1.16128	0.256108419964936	-4.53431128473472	5.77917458862481e-06	3.20715e-05
C2orf55	386.416622062076	-0.863099	0.193947624208902	-4.45016776970305	8.58032340778475e-06	4.53521e-05
C2orf65	15.1260428458162	-0.800981	0.159447143939185	-5.02348655639091	5.07417781614965e-07	3.69066e-06
C2orf70	0.922713599497133	-2.62259	0.578689779109409	-4.53194232122903	5.84438094735591e-06	3.23684e-05
C2orf71	8.97515906336695	-0.969699	0.220771574993513	-4.39231816144254	1.12148418452169e-05	5.76695e-05
C2orf77	113.638833987209	-0.903704	0.130668479824512	-6.91600485390271	4.6455848747936e-12	1.20436e-10
C2orf85	729.88993113527	0.919971	0.192019221624648	4.79103849950898	1.65920282684337e-06	1.064e-05
C3	5529.56969599823	-1.19427	0.183601407591643	-6.50471299197375	7.78418534493937e-11	1.48614e-09
C3AR1	359.399624582453	-0.813506	0.16033393443412	-5.07382502126198	3.89897611964584e-07	2.92612e-06
C3orf15	76.0905109189313	-0.828057	0.183193682076364	-4.52011940996931	6.18047608562633e-06	3.39286e-05
C3orf16	1.78899037039668	-3.55172	0.586521753728914	-6.05557132451349	1.39920159881214e-09	1.91783e-08
C3orf52	4.25988220518067	-2.66453	0.346453589826052	-7.69086645552948	1.46141912568398e-14	7.26577e-13
C3orf54	76.6502729915524	-0.632577	0.120335293910199	-5.25678494697653	1.46595566089412e-07	1.22947e-06
C3orf57	79.2321731943474	-1.09489	0.221433069450178	-4.94456879162997	7.6312591002464e-07	5.29371e-06
C3orf58	345.150278857022	-0.594477	0.101934999660901	-5.83192331515614	5.4792100816795e-09	6.434e-08
C3orf66	5.02498183063344	-1.5046	0.304105588417596	-4.94763302753912	7.51213633322451e-07	5.22231e-06
C4A	6315.92361340958	-0.941895	0.175919685335719	-5.35411728202678	8.59750845185403e-08	7.55799e-07
C4orf31	77.7150835329461	-1.95252	0.260927824939715	-7.48297247912637	7.26601018762944e-14	2.99626e-12
C4orf32	40.9028975268582	-0.732548	0.119127852167141	-6.14925971687294	7.78454196661989e-10	1.13711e-08
C4orf38	2.89503280302929	-0.798948	0.155333286068442	-5.1434462992387	2.6974378399685e-07	2.10867e-06
C5AR1	114.099118299972	-0.914524	0.188776410932951	-4.84447977831954	1.26943845537028e-06	8.34898e-06
C5orf23	28.6144773723855	-1.60007	0.243742760746897	-6.56460312056387	5.21716294840024e-11	1.03913e-09
C5orf25	97.0718775460007	-1.26211	0.195221618405165	-6.46499603352819	1.01301466374419e-10	1.8766e-09
C5orf32	532.508410351884	-0.856445	0.116799345980834	-7.33261448636251	2.25705510477735e-13	8.23433e-12
C5orf39	43.5279027455301	-0.596293	0.136082969162117	-4.38183526063995	1.17683780445101e-05	6.02118e-05
C5orf49	52.4653810621677	-2.13021	0.265995991233897	-8.00842196402226	1.16189650531029e-15	7.64322e-14
C5orf62	293.338262077091	-0.657805	0.123775289676335	-5.31450922192868	1.06945166451579e-07	9.22533e-07
C6	2.33767090315604	-3.46098	0.548850148439384	-6.3058807723766	2.86559571280327e-10	4.75713e-09
C6orf115	98.8152622326623	-0.957321	0.113803467681358	-8.41205687804175	4.02882427443325e-17	3.76413e-15
C6orf124	34.1824837620447	0.653856	0.135931269866536	4.81019803418297	1.50780833029873e-06	9.76918e-06
C6orf141	6.139321640603	-1.55834	0.270350103994957	-5.76413907527037	8.2075715832391e-09	9.16481e-08
C6orf150	12.0128057875284	-0.709	0.151411034347863	-4.68261638812018	2.83236270789305e-06	1.7161e-05
C6orf155	46.7666007028109	0.657421	0.113457423574184	5.79442807376716	6.85543957712689e-09	7.80525e-08
C6orf164	8.80965326944216	0.648001	0.132342121958841	4.89640930870672	9.76036616749016e-07	6.60481e-06
C6orf165	15.4638980808978	-1.26988	0.192613721483682	-6.59289183365337	4.31340849619034e-11	8.76274e-10
C6orf208	21.403354659137	0.781979	0.181062049828497	4.31884467927358	1.56848114372765e-05	7.7542e-05
C7	131.438613288997	-1.22999	0.243124494879053	-5.05911328942708	4.21210572003499e-07	3.13557e-06
C7orf29	17.5820224064925	-1.31685	0.168353413754683	-7.82193862052508	5.20159720487435e-15	2.84983e-13
C7orf31	50.8147110750575	-1.01143	0.132820784857376	-7.61499186476008	2.63708077739191e-14	1.21143e-12
C7orf52	188.730314338854	0.777142	0.175823862941603	4.42000474930622	9.86987320970083e-06	5.14927e-05
C7orf57	6.7560668443049	-2.37912	0.341014058742739	-6.97659596548814	3.02417793835083e-12	8.26096e-11
C7orf58	66.2398993895177	-1.05644	0.189383543323988	-5.57830651479454	2.4287141968946e-08	2.43123e-07
C8orf34	44.1807587875398	-2.26434	0.243990306080051	-9.28046627178954	1.68738505008535e-20	3.93181e-18
C8orf4	223.415125989193	-1.27541	0.202182339662005	-6.30820989324113	2.8228123711739e-10	4.70631e-09
C8orf51	15.2814282491403	-0.971928	0.134198143672761	-7.24248587197585	4.40534342527856e-13	1.4895e-11
C8orf84	36.4652066630603	-0.770762	0.170429608164683	-4.52246789338892	6.1122760356693e-06	3.36306e-05
C8orf85	5.90642311425184	-1.79838	0.316085980593651	-5.68951486874241	1.27400796761466e-08	1.36296e-07
C8ORFK29	29.0194888800254	0.760372	0.15797476756477	4.81324744087152	1.48497235902039e-06	9.65357e-06
C9orf128	2.24416060264559	0.756675	0.167384148332045	4.52058954186385	6.16676540559658e-06	3.38678e-05
C9orf140	2467.72850406267	0.851495	0.160075693057215	5.31932722413331	1.04151666570651e-07	9.00444e-07
C9orf24	70.7959801277526	-2.10588	0.297154166828227	-7.08681670205214	1.37231949597533e-12	4.09578e-11
C9orf44	3.45192501028117	-4.60483	0.839620798409867	-5.48442010220262	4.14827914864152e-08	3.94627e-07
C9orf47	13.4327462014345	-0.879254	0.167340861060615	-5.25427097667203	1.48611943287098e-07	1.24315e-06
C9orf64	117.150995101882	-0.890824	0.160807859201573	-5.53967826518586	3.03027844114841e-08	2.9749e-07
C9orf66	2.17833874564901	-0.998623	0.212427146628291	-4.70101342206745	2.58873496570963e-06	1.58155e-05
C9orf89	113.737696990746	-1.0012	0.138323851184392	-7.2380667130793	4.55125571487771e-13	1.53347e-11
CA13	52.4732844295824	-0.588891	0.128429179341129	-4.58533490800259	4.53259302632049e-06	2.59884e-05
CA2	1430.56455701915	-1.02045	0.16567929675563	-6.15919887843426	7.31138608430039e-10	1.08023e-08
CA3	14.6177054810269	-1.41222	0.210276872017504	-6.71597879245536	1.86807963947698e-11	4.14319e-10
CA9	9.67626519478152	-1.44989	0.245417313387709	-5.90784217586452	3.46617843753145e-09	4.27798e-08
CABP4	4.41788078154424	-1.17258	0.200527511621	-5.84747728184302	4.99083972503478e-09	5.93257e-08
CACHD1	643.667840184563	-0.670527	0.110426488457412	-6.07215290532886	1.26206673436157e-09	1.74845e-08
CACNA1A	1088.24691629612	0.606711	0.134874067663736	4.49835531609093	6.84811767113335e-06	3.71925e-05
CACNA1F	7.19503095032848	-1.20038	0.278509154883411	-4.31003318192777	1.63230051939975e-05	8.02254e-05
CACNA1S	5.68974348649788	-1.79484	0.299077619010161	-6.00126328401176	1.95788219461481e-09	2.59352e-08
CACNG2	201.098122524637	1.00303	0.192935210431761	5.19876804531668	2.00613676557226e-07	1.61594e-06
CACNG4	5565.85735155187	1.11301	0.15130088431979	7.35629055480388	1.89091195145191e-13	7.01924e-12
CAPG	592.719494261192	-1.09249	0.157570205821796	-6.93332790291766	4.1105390233492e-12	1.07575e-10
CAPN12	13.7331429958703	-0.880937	0.141825804065779	-6.21140234003894	5.2513823882687e-10	8.09257e-09
CAPN14	8.29658315384599	0.676323	0.142291944804326	4.75306897667804	2.00351957480372e-06	1.26174e-05
CAPNS1	3531.3220219303	-0.676548	0.0637002538738667	-10.6208083415479	2.38486921446756e-26	2.19635e-23
CAPSL	3.19022777581642	-3.61475	0.503172483246354	-7.18391375334078	6.77436084219135e-13	2.18725e-11
CAPZA1	961.655669359409	-0.682802	0.0584954146593321	-11.6727494361378	1.75653050032177e-31	4.85304e-28
CARD11	104.211403345981	-0.771072	0.137875905010454	-5.59250464646511	2.23817162472573e-08	2.26392e-07
CARD16	23.5579072976132	-1.51088	0.182989012088325	-8.25667231131406	1.49789925674567e-16	1.24868e-14
CARD9	54.3740353713672	-0.835582	0.14478340122422	-5.77125793323471	7.86819277472166e-09	8.81128e-08
CASC1	32.0278253782095	-1.13757	0.165204683048325	-6.88584472296297	5.74456244252883e-12	1.45992e-10
CASP1	96.4606479567433	-1.04283	0.140486108561134	-7.42301730798838	1.14481809349602e-13	4.48194e-12
CASP4	75.1699813978137	-1.07764	0.141693529943897	-7.60539659704999	2.8403152177192e-14	1.28948e-12
CASP6	61.7384383983728	-0.638403	0.109348053654677	-5.83826881845365	5.27460057950402e-09	6.22017e-08
CASP8	64.6858739408834	-0.740951	0.117256099490733	-6.31908214493318	2.63121392147275e-10	4.42117e-09
CASQ2	22.3895019085601	-1.17807	0.200807229697247	-5.86666587877667	4.44645411988322e-09	5.35791e-08
CASZ1	95.8333476879244	-0.821778	0.192312224696476	-4.27314321732475	1.92736573401482e-05	9.30021e-05
CBLN3	22.5780811185855	-1.0317	0.16752503862266	-6.15845706802774	7.34570915821419e-10	1.08365e-08
CBR1	1316.00051697034	-0.890062	0.180884755447578	-4.92060536227734	8.62769389163435e-07	5.90863e-06
CBX2	157.649380706671	-0.811316	0.172456621608478	-4.70446255637396	2.54535574033913e-06	1.55968e-05
CCDC103	414.627769556931	-0.683517	0.124167601176071	-5.50479706604628	3.69593754829865e-08	3.56684e-07
CCDC108	13.6946593691145	-1.03053	0.188541676865372	-5.46577519842658	4.60888135588428e-08	4.33118e-07
CCDC109B	76.7078859344525	-1.44806	0.157843004604729	-9.17404259379496	4.55604923041876e-20	9.27516e-18
CCDC11	33.5680654332943	-0.686881	0.149891460458897	-4.58252249158816	4.59400278054772e-06	2.62864e-05
CCDC122	13.9997019779525	-1.16698	0.187755168548684	-6.21545678529389	5.11755567970618e-10	7.93057e-09
CCDC135	14.5513825802976	-2.32336	0.271564842426518	-8.55544481558931	1.17415087614533e-17	1.27573e-15
CCDC146	144.839713360657	-1.19114	0.14428640197468	-8.25537321913789	1.51428291847935e-16	1.25692e-14
CCDC152	76.2622295723397	-1.31627	0.161576886055042	-8.14637725922684	3.74989003999166e-16	2.83292e-14
CCDC153	4.0074908443985	-1.43094	0.221912678054339	-6.44821441166995	1.13175580223915e-10	2.07274e-09
CCDC154	32.2221642397161	1.07517	0.185781667738792	5.78727925401509	7.15356013347619e-09	8.08591e-08
CCDC163P	50.9638544279605	-0.766706	0.167556043801251	-4.57582103639383	4.74355928013765e-06	2.70381e-05
CCDC18	22.4622933527539	-1.24648	0.168246535701749	-7.40864699568631	1.27594434098468e-13	4.91569e-12
CCDC19	2.13176294986803	-2.4154	0.342970544640367	-7.04258948118159	1.88699572961774e-12	5.41461e-11
CCDC23	204.388353118189	-0.591244	0.0677985128228936	-8.72059762176929	2.767372321853e-18	3.40898e-16
CCDC24	111.633248432565	-0.821673	0.110736330323342	-7.42008892470716	1.1704172484032e-13	4.5729e-12
CCDC3	424.503385983224	-0.766274	0.177444940151617	-4.3183762623695	1.57181303307752e-05	7.7676e-05
CCDC30	66.4702401430495	-0.943965	0.127921483915594	-7.37925156290197	1.59181812316958e-13	6.00112e-12
CCDC40	136.01700897289	-0.94354	0.142853799142183	-6.60493350603286	3.97695806702061e-11	8.15635e-10
CCDC46	67.168658879175	-0.999957	0.123910385949772	-8.07000167355441	7.02972046964337e-16	5.05408e-14
CCDC65	24.3128803888233	-1.61025	0.205740383991952	-7.8265946086995	5.01262128905244e-15	2.76194e-13
CCDC69	157.794825438752	-0.662046	0.111497338895116	-5.93777035709936	2.88924350275454e-09	3.64026e-08
CCDC8	91.1354656980468	-2.22938	0.21279285886937	-10.4767660137944	1.10456439600781e-25	7.91195e-23
CCDC81	15.5671542028537	-1.07661	0.173477976930462	-6.2060154961282	5.4344822010259e-10	8.30197e-09
CCDC88C	223.80453792735	-0.592016	0.13661284372279	-4.33352771346902	1.46738798705978e-05	7.31425e-05
CCDC89	24.0503568609879	-0.977556	0.176523143065772	-5.53783334810442	3.06236444736283e-08	3.00031e-07
CCDC96	71.6654654325936	-0.752571	0.116761552008381	-6.44536801899908	1.15320242628657e-10	2.10405e-09
CCL20	1.21926562073351	-1.98261	0.430604797340561	-4.60424204250561	4.13970780059447e-06	2.39994e-05
CCL22	4.96413353652724	-0.906532	0.210913659656534	-4.29812061776274	1.72252424345218e-05	8.41253e-05
CCL25	1.77351824248678	-1.58097	0.350851954295371	-4.50609638032296	6.6031104459786e-06	3.59831e-05
CCL28	4.6217083647424	-1.16522	0.268930796688205	-4.33278232462862	1.47236668824555e-05	7.33134e-05
CCL5	43.1143840666857	-1.5779	0.205278828008255	-7.68663117072144	1.51059803241901e-14	7.4528e-13
CCNA1	34.2467591210077	-1.2312	0.284251839174873	-4.33138344207952	1.48175380551046e-05	7.36498e-05
CCNB1	215.562313146962	-0.79364	0.146681245480695	-5.41064094288652	6.27995744029854e-08	5.68873e-07
CCNB2	94.2724597753248	-1.18305	0.255980439720947	-4.62163755360438	3.80722761090133e-06	2.2252e-05
CCNE1	57.2926686036239	-0.580722	0.105895986101697	-5.48388703615707	4.16080518768071e-08	3.95624e-07
CCNO	21.9740539799684	-1.32773	0.299677618223396	-4.43051519637724	9.40082218993054e-06	4.92715e-05
CCR1	154.994757761131	-0.976889	0.169975611661726	-5.74722767312045	9.07185420745236e-09	1.00143e-07
CCR2	5.28671927578515	-1.79473	0.360879425644706	-4.97322234247528	6.58490626300954e-07	4.65809e-06
CCR5	31.7248533409704	-1.36267	0.207218683331093	-6.57598820654377	4.83310858896892e-11	9.74685e-10
CD101	28.0131691967061	-0.999747	0.156279606298772	-6.39717005680971	1.58283014700434e-10	2.79302e-09
CD109	144.708084581685	-1.02229	0.146859681710029	-6.96101554526109	3.37828488862658e-12	9.12514e-11
CD14	965.47373212565	-0.861889	0.174332699456952	-4.94392998963999	7.65632085404719e-07	5.30919e-06
CD163	554.765684545713	-1.40535	0.283475404963195	-4.95758380725062	7.13752568656928e-07	4.98446e-06
CD19	1.1010681761549	-1.85094	0.394159769032565	-4.69591665216476	2.65413757473866e-06	1.61825e-05
CD2	9.70675142915889	-2.1188	0.281406878680126	-7.52932364732538	5.10038198338611e-14	2.18233e-12
CD200R1	2.23731668903264	-1.25551	0.244488997437301	-5.13526175217053	2.81751604022311e-07	2.19102e-06
CD226	8.01893613746202	-1.14177	0.180805874526587	-6.31487603821475	2.70378113990365e-10	4.53522e-09
CD244	6.2789062369144	-1.30447	0.230085612744107	-5.66951475531515	1.43202518144429e-08	1.51672e-07
CD247	10.470740885606	-1.2321	0.151454970347696	-8.13508764779692	4.11640423910243e-16	3.07379e-14
CD248	143.85411583021	-0.898955	0.207410905253004	-4.33417624928747	1.46306926351983e-05	7.29648e-05
CD274	12.486073759089	-0.960575	0.201063318018022	-4.77747464164366	1.77510427830004e-06	1.13414e-05
CD300A	151.3556296337	-0.822113	0.136922409851356	-6.00422383314387	1.92249333989748e-09	2.55014e-08
CD300C	21.1083149544548	-0.895449	0.165305481760367	-5.41693432986923	6.0629596393478e-08	5.51801e-07
CD300LF	21.1490045949717	-0.80498	0.183077595220789	-4.39693610507618	1.0978964684974e-05	5.65769e-05
CD302	451.196992588385	-1.0373	0.129238324726405	-8.02626950747597	1.00481351239732e-15	6.79479e-14
CD33	58.7376981747392	-0.806338	0.15025688294965	-5.36639385731751	8.03264351711008e-08	7.12567e-07
CD37	248.851105313397	-0.876744	0.151238789566308	-5.7970824457361	6.7478522765188e-09	7.69932e-08
CD3D	3.31277664846862	-2.47929	0.428655348279936	-5.78386721328221	7.30025753660015e-09	8.23728e-08
CD3E	13.1457457536847	-1.98308	0.267066306639116	-7.42542968870359	1.1241437226245e-13	4.40993e-12
CD4	769.628777946672	-0.764292	0.121483177608259	-6.29134381007061	3.1472938888751e-10	5.17198e-09
CD40	71.7798030636471	-0.972523	0.138440177564225	-7.02486261260617	2.14276986960139e-12	6.03219e-11
CD44	3088.31117974272	-0.842929	0.179935170340731	-4.68462871287373	2.80467874502723e-06	1.70199e-05
CD5	6.17866477372561	-1.48456	0.208502383444627	-7.12008778986579	1.07858340832895e-12	3.32692e-11
CD52	21.8114694538508	-1.03068	0.19354557622325	-5.32527682232862	1.00799409795227e-07	8.74982e-07
CD53	480.133209530798	-0.896594	0.136948526060217	-6.54693845653455	5.87285505824929e-11	1.15663e-09
CD55	182.238915536549	-0.696065	0.111907889531884	-6.21997966566687	4.97219316083257e-10	7.75502e-09
CD58	63.9483198886685	-1.32734	0.148262922305328	-8.95259278141066	3.47228833736431e-19	5.69102e-17
CD6	14.8277783200511	-1.44577	0.200486788226471	-7.21131404858035	5.54144842841525e-13	1.83828e-11
CD68	1254.4553959355	-0.745166	0.143958170012762	-5.17626512870384	2.26371710518398e-07	1.80092e-06
CD69	19.8785877280476	-1.2851	0.239662075418303	-5.36215193686852	8.2236322547815e-08	7.27229e-07
CD7	9.92564708676842	-1.24053	0.178908298933087	-6.93388609187182	4.0943437467647e-12	1.07296e-10
CD72	20.0092812822096	-0.621658	0.14135975346998	-4.39770112760302	1.09403487834998e-05	5.6423e-05
CD74	9933.32421724931	-1.26613	0.168337818888887	-7.52134034225507	5.42175077694687e-14	2.29949e-12
CD79A	4.61713981733887	-1.34907	0.229606325625578	-5.87559040276491	4.2133895066017e-09	5.1025e-08
CD79B	5.32032446836122	-1.27066	0.22247166785351	-5.71153690460254	1.11960410925006e-08	1.21442e-07
CD83	347.580345416134	-0.70192	0.14440328892168	-4.86083253192902	1.16893110668275e-06	7.75545e-06
CD86	158.416706749895	-0.92514	0.152207652778098	-6.07814689487709	1.21579356453372e-09	1.69249e-08
CD8A	22.7524326100353	-1.21374	0.194557475651384	-6.23845684861507	4.41908485198711e-10	6.99387e-09
CD96	4.3409750387546	-1.8538	0.27496186526556	-6.74204114698882	1.561768358633e-11	3.50808e-10
CDC20	96.8009252709218	-1.56442	0.223345841945119	-7.00445395681728	2.47950945432781e-12	6.88002e-11
CDC42	2752.73031521832	-0.637134	0.0604089990118513	-10.5469978560803	5.24461527456509e-26	4.22629e-23
CDC42EP5	11.6686681952623	-0.909352	0.200734159212113	-4.53013272818912	5.89466426299736e-06	3.26002e-05
CDC6	76.9195769414769	-1.05711	0.18017338334389	-5.86720434906933	4.43204317294475e-09	5.34387e-08
CDCA8	65.3897741070047	-1.36703	0.200994575754764	-6.80133457030352	1.03654380794454e-11	2.46881e-10
CDCP1	50.8818168818071	-1.08986	0.184934725663784	-5.8932246865154	3.78730870359819e-09	4.63879e-08
CDHR1	1610.18451767457	0.795068	0.142318188150474	5.58655574853321	2.31617218831369e-08	2.33306e-07
CDK2	244.949844646532	-0.804489	0.137019569789723	-5.87134276226045	4.32279471219859e-09	5.22518e-08
CDKL1	60.967708408619	0.581468	0.117009738614332	4.96939424164437	6.71623905834434e-07	4.7229e-06
CDKN3	43.3473185421775	-0.865542	0.164303922229884	-5.26793154797626	1.37969532158403e-07	1.16446e-06
CDO1	1073.52281645675	-0.822341	0.109270832372131	-7.52571284230791	5.24334635777447e-14	2.23362e-12
CDR1	135.767555679056	0.8052	0.170604920738534	4.71967593247506	2.36220666522996e-06	1.46239e-05
CDR2	232.018863318207	-0.739484	0.114870736958931	-6.43752982370122	1.2143346881089e-10	2.20312e-09
CDRT4	93.6382742931293	-0.677676	0.1343696527988	-5.04337391951369	4.5739418978639e-07	3.37376e-06
CDS1	254.178348377226	-0.978931	0.225885828236951	-4.33374429377881	1.46594438735866e-05	7.30894e-05
CEACAM1	4.48529073780422	-1.41378	0.198787356218392	-7.11202069775254	1.14356106331563e-12	3.50499e-11
CEACAM21	15.0001962616042	-0.893603	0.15630079391729	-5.71720352648566	1.08291384596207e-08	1.18058e-07
CEBPA	360.941950158969	-0.753643	0.146608069510437	-5.14052614451475	2.73970197212525e-07	2.13998e-06
CEBPB	300.645667318255	-0.66672	0.126066608318817	-5.28863548223058	1.23232195274509e-07	1.0491e-06
CECR1	421.377628635981	-0.943246	0.114921132639677	-8.20776864313481	2.25336875600797e-16	1.77155e-14
CECR2	363.091183275361	0.855774	0.112442635849615	7.61075956102786	2.72489738278523e-14	1.24585e-12
CELSR1	49.2732791098697	-2.25856	0.22626882325208	-9.98177241956024	1.83165224231658e-23	7.53705e-21
CELSR3	1843.5755571282	0.842931	0.140511998758274	5.99899511917044	1.98542325053263e-09	2.62282e-08
CENPA	22.6015302052378	-1.2752	0.256613188769966	-4.96934216697908	6.71804289776853e-07	4.7229e-06
CENPE	67.8999206750957	-1.03141	0.209213197387905	-4.92992378221543	8.22617042776612e-07	5.67181e-06
CEP55	41.5263313184702	-1.08652	0.248429297406751	-4.37356141259647	1.22235837217085e-05	6.22608e-05
CES1	18.3194616876844	-1.53371	0.321398806946101	-4.7719811678519	1.82422564645393e-06	1.16246e-05
CFB	86.8032289341515	-0.909627	0.147560462580844	-6.16443325247025	7.07360262325036e-10	1.05072e-08
CFH	250.702982345465	-0.854857	0.153046748123601	-5.58559107049384	2.32906695599484e-08	2.34483e-07
CFI	214.062325377263	-0.781561	0.178071852114593	-4.38901793333982	1.13863680644942e-05	5.84428e-05
CHAC1	51.2451219309328	-1.05347	0.20464125706779	-5.14786322065988	2.634704910747e-07	2.0638e-06
CHAF1B	71.4845445442787	-1.40532	0.164780413184148	-8.52845107766789	1.4832019844475e-17	1.50974e-15
CHEK2	52.2894699377214	-0.760787	0.146859632333612	-5.1803671593144	2.2144958534674e-07	1.76612e-06
CHGB	4509.66604828591	0.804982	0.160808012080713	5.0058585252643	5.56135938782494e-07	4.01331e-06
CHI3L1	2215.66437763646	-4.25922	0.307950355909909	-13.8308742725507	1.65990729537292e-43	1.60513e-39
CHI3L2	353.13343598619	-2.16444	0.260078890257332	-8.3222348739036	8.63200454947577e-17	7.55398e-15
CHODL	18.5858813120617	-0.745843	0.17466268412043	-4.27018820262225	1.95308087713663e-05	9.40787e-05
CHRNA9	2.83539728545406	-1.90225	0.373700952402675	-5.09029390775106	3.57508947718119e-07	2.70102e-06
CHST11	502.501982583521	0.81199	0.11700459846049	6.93980900901719	3.92630396340026e-12	1.03453e-10
CHST2	545.028896239755	-0.830498	0.111528604966045	-7.44649847208948	9.58501462297685e-14	3.82215e-12
CHST6	283.011807010879	-1.09965	0.181543500184059	-6.05723517764508	1.38481057729464e-09	1.90182e-08
CHST8	126.13456442053	-0.924501	0.216833659460867	-4.26363950624769	2.01123832440934e-05	9.65914e-05
CHSY3	49.8980961048787	-0.825479	0.165223262257712	-4.99614236452151	5.84884895440887e-07	4.20508e-06
CIITA	75.8240732380549	-1.18731	0.198597121419321	-5.97847046749137	2.25242436020258e-09	2.92558e-08
CISH	28.3186021680949	-1.38307	0.178981909734642	-7.72745065963977	1.09721668811787e-14	5.5696e-13
CITED4	44.1627659216112	-1.21247	0.159352204266302	-7.60876245522251	2.76732829428226e-14	1.26227e-12
CKMT2	41.9337155214703	-0.886719	0.169003565174783	-5.24674895951822	1.54806610016274e-07	1.28662e-06
CLCF1	15.8666955096507	-1.52237	0.198478021436215	-7.67020683931446	1.71719212256764e-14	8.30262e-13
CLCNKA	1.28721100579689	-2.30847	0.435429555056077	-5.30158096560296	1.1480411181676e-07	9.83745e-07
CLCNKB	0.67634448114408	-1.852	0.400512556480033	-4.62407927638955	3.76265951997535e-06	2.20314e-05
CLDN11	1807.48172749351	-1.09629	0.235260617507924	-4.65989438471728	3.16371673539198e-06	1.8873e-05
CLDN23	8.01268030867173	-0.838321	0.155102161920672	-5.40496242652995	6.48219798458369e-08	5.86369e-07
CLDN7	6.96250095408786	-0.923997	0.201886870926508	-4.57680520126375	4.72130716015616e-06	2.69192e-05
CLEC17A	5.58444621442433	-1.32767	0.292319989336574	-4.54184390403445	5.57643258909352e-06	3.10843e-05
CLEC18A	39.092885680527	-0.821626	0.159966554514253	-5.13623563138271	2.80296183466831e-07	2.18146e-06
CLEC18B	33.3012161885418	-1.485	0.190512009940293	-7.79479652848663	6.45123468538792e-15	3.42766e-13
CLEC18C	4.76590021278845	-1.22133	0.224754863680467	-5.43404497442373	5.50906857894524e-08	5.06154e-07
CLEC2B	47.1657009587006	-0.766912	0.146331439820773	-5.24092662749312	1.5977223964778e-07	1.32051e-06
CLEC4F	46.9894374116763	1.18074	0.204475055863467	5.77451547213377	7.71748385272823e-09	8.66257e-08
CLEC5A	29.4491260997585	-1.95828	0.387167251667458	-5.05795722054394	4.23771466134929e-07	3.151e-06
CLEC7A	71.892524736289	-1.04085	0.176275889985324	-5.90469184453876	3.53306520342294e-09	4.3522e-08
CLGN	233.479088484273	0.597253	0.122195314678027	4.8876907494483	1.02025625935725e-06	6.87039e-06
CLIC1	679.661394940179	-1.02335	0.13963800376528	-7.32861256548697	2.32547592584464e-13	8.42223e-12
CLIC2	83.9172848414679	-0.626434	0.102928185305365	-6.08612255722784	1.15677906524338e-09	1.61986e-08
CLIC6	10.2350379037293	-2.57864	0.31676633283865	-8.14050723613745	3.93625309030176e-16	2.95704e-14
CLSPN	38.8598237437621	-1.22569	0.231005559873186	-5.30588720098209	1.12126282220342e-07	9.64216e-07
CLUL1	17.0314708194256	-1.27618	0.254345297808312	-5.01751838255198	5.23431945877027e-07	3.79572e-06
CMTM7	86.0946485893768	-1.28241	0.148539051897736	-8.6334709543378	5.9517774456927e-18	6.77102e-16
CMYA5	112.768122311072	-1.43231	0.205331333895624	-6.97559990483023	3.04568353932304e-12	8.30797e-11
CNFN	4.25937554196027	-0.893509	0.18573093938938	-4.81076921437584	1.50350541567881e-06	9.7511e-06
CNN1	50.1904674818762	-1.73678	0.238099590918982	-7.2943270664703	3.00155481204456e-13	1.06319e-11
CNN3	5495.14234305867	-0.789648	0.0995395077416222	-7.93300990888408	2.13897357857234e-15	1.31744e-13
CNPY1	8.08318477381509	-1.02654	0.211566748290854	-4.85206359436594	1.22183428002009e-06	8.07597e-06
CNTNAP3	64.9511620991009	-0.640261	0.148031605956393	-4.32516113725383	1.52420404705445e-05	7.55655e-05
COCH	40.5125409566539	-1.07593	0.201460935403533	-5.34066216519684	9.2607694499911e-08	8.08228e-07
COL11A2	424.955543713499	0.835334	0.136272060117366	6.12990088950624	8.79338339562556e-10	1.26348e-08
COL12A1	169.989992436476	-1.24604	0.194728990624407	-6.39884038896479	1.56561393831808e-10	2.77224e-09
COL14A1	138.112054734588	-1.21788	0.215623556947569	-5.64815820199093	1.6217590427837e-08	1.69448e-07
COL15A1	59.8023544215525	-1.98424	0.254268156668842	-7.80374467408186	6.00967199955249e-15	3.2181e-13
COL17A1	23.6187446740497	1.08222	0.241594307207867	4.47948578957535	7.4823071027198e-06	4.01855e-05
COL18A1	1419.12626748263	-0.665221	0.152750425858239	-4.35495042001993	1.33097039389886e-05	6.70338e-05
COL1A1	666.961889271737	-1.79013	0.28576019511543	-6.26446034226592	3.74118753879492e-10	6.02453e-09
COL1A2	994.707679012227	-0.899599	0.194901828515179	-4.61565426536705	3.91858834670062e-06	2.2827e-05
COL21A1	34.3859652510966	-1.78661	0.245336745280044	-7.28226674766323	3.2825718847821e-13	1.14182e-11
COL27A1	84.8785381112326	-1.15607	0.230774948574094	-5.00952972675155	5.45631987640473e-07	3.94045e-06
COL2A1	44.0569691986772	-2.0858	0.395379467218524	-5.27543131166816	1.32444213317747e-07	1.12395e-06
COL3A1	662.633968001688	-1.53888	0.282587402536446	-5.4456875364785	5.16056588599822e-08	4.77309e-07
COL4A5	705.119360868059	-0.727726	0.170301880552041	-4.27315101076602	1.92729834220458e-05	9.30021e-05
COL4A6	57.4975116391645	-1.51841	0.235816951800615	-6.43891968847577	1.20326843423427e-10	2.18509e-09
COL5A1	178.179258523155	-1.31497	0.256655279052481	-5.12348413887916	2.9994088803127e-07	2.31294e-06
COL5A2	490.069448790234	-1.33207	0.196464066452857	-6.78023068334831	1.19984145868195e-11	2.81272e-10
COL6A2	584.794181762859	-1.35218	0.216276631959517	-6.25210816259824	4.04948769625913e-10	6.47641e-09
COL6A3	139.652858722119	-1.55096	0.2610450322935	-5.94136104190028	2.82665287902387e-09	3.57551e-08
COL8A1	26.60804657927	-2.46552	0.284329339895578	-8.67134221060359	4.27056116025169e-18	4.97546e-16
COL8A2	104.059615378437	-1.11423	0.166261633733003	-6.70165465571079	2.06072595647328e-11	4.53923e-10
COLEC11	13.2465435830992	-1.10691	0.242036682188378	-4.57332421273345	4.80046446281195e-06	2.73001e-05
COLEC12	343.223103091752	-1.21023	0.152899203738289	-7.9151888488528	2.4687806984723e-15	1.4828e-13
COPZ2	104.042403386026	-0.893233	0.136124163984043	-6.56189655191004	5.31276697705923e-11	1.05709e-09
CORO1A	905.832937365625	-0.737427	0.0972131730804805	-7.58566623929142	3.30782908688082e-14	1.47745e-12
COX7A1	148.213319393504	-1.14934	0.188849928031603	-6.08601952870771	1.15752329513007e-09	1.61986e-08
CP	275.913503471618	-1.50475	0.249580975189062	-6.02908751802946	1.64887983786774e-09	2.23628e-08
CPA4	4.14000269564383	-1.31941	0.260531867159364	-5.0643128645141	4.09876037548998e-07	3.05708e-06
CPNE5	1910.36134672914	0.644561	0.144367020554436	4.46473578534236	8.01676200573133e-06	4.26414e-05
CPNE6	563.333428033727	-1.21	0.277203296461038	-4.36502805581018	1.271064437861e-05	6.43518e-05
CPNE8	93.3796349250137	-1.01801	0.190818334272029	-5.33496181696349	9.5564665009185e-08	8.32907e-07
CPPED1	230.926861412182	-0.834499	0.135972713959161	-6.1372511721804	8.39615821655894e-10	1.21725e-08
CPZ	23.974078703538	-1.24949	0.228543366493349	-5.46717130300716	4.57274090531152e-08	4.30764e-07
CRABP1	32.2710227634011	-1.67152	0.359141167281029	-4.6542179302248	3.25212697385688e-06	1.93705e-05
CRABP2	78.5889831747074	-0.911671	0.18926590327682	-4.81687932440348	1.45820816094105e-06	9.48596e-06
CRB2	389.234289818449	-1.30368	0.192082681297757	-6.78707739837182	1.14427829241303e-11	2.69553e-10
CREB3L1	293.58308205268	1.13956	0.224889773516131	5.06717454740286	4.0376401434984e-07	3.01964e-06
CREB3L4	268.149571620394	0.669783	0.123282108104244	5.43293287664852	5.54352646996758e-08	5.08595e-07
CRIP1	67.0134800799143	-1.00025	0.18204335587159	-5.49457063022731	3.91662152949493e-08	3.76478e-07
CROT	373.191558255446	-0.658679	0.0838704893590594	-7.8535280595701	4.04494258366757e-15	2.2874e-13
CRTAC1	2159.38453376735	0.924522	0.153652313163974	6.01697097878239	1.7771092576184e-09	2.38676e-08
CRTAM	1.99920769289082	-1.34366	0.27180023448269	-4.94355526742647	7.67105899204086e-07	5.31369e-06
CRYBB1	27.0250809763267	-0.841191	0.161497945770621	-5.20868028017557	1.90188505014909e-07	1.54224e-06
CRYBG3	329.90845686947	-0.679577	0.159498480818307	-4.2607121896176	2.0377651084114e-05	9.76713e-05
CRYGD	1.73107975642129	-2.3777	0.505001650263472	-4.70829283323758	2.49800067834767e-06	1.53418e-05
CRYZ	300.530324295617	-0.764268	0.0994792057468726	-7.68269043877629	1.55781711723218e-14	7.64675e-13
CSF1R	2309.43859011385	-0.844318	0.155001091420869	-5.44717383792743	5.11764411415211e-08	4.73792e-07
CSF2RA	209.920941551255	-0.785764	0.161450208485641	-4.86691328052407	1.13354737701965e-06	7.54658e-06
CSF2RB	45.0143739523764	-1.07569	0.155079792128899	-6.93638311448852	4.02265777437589e-12	1.05704e-10
CSF3R	210.707384750962	-0.84372	0.14026627653068	-6.01512895937332	1.79743551097408e-09	2.40904e-08
CSMD3	1064.98887340596	0.95268	0.160685227711624	5.928859227824	3.05046455436707e-09	3.81851e-08
CSNK1A1L	3.50785346298996	0.683153	0.149228461052733	4.57790314779143	4.69660041646988e-06	2.681e-05
CSPG5	8516.14782363836	0.907322	0.124468815839451	7.28955393679421	3.10982917989371e-13	1.09552e-11
CSRP1	6184.5246809846	-0.735424	0.162345002989226	-4.53000477325701	5.89823538775931e-06	3.26105e-05
CST7	7.40185994180474	-1.40124	0.260133496430329	-5.38660520008289	7.18009108661127e-08	6.42884e-07
CTBS	154.922916501656	-0.872272	0.101986963296266	-8.55277762137511	1.20161263132124e-17	1.29828e-15
CTF1	41.7330477789122	-0.99828	0.144269705868031	-6.91953866847229	4.53116795417274e-12	1.17945e-10
CTHRC1	36.9887767395997	-1.25198	0.202450336288587	-6.18414867497224	6.24385013055248e-10	9.37547e-09
CTLA4	3.29614227990967	-1.09005	0.2530064615268	-4.30837052029096	1.64461708992878e-05	8.08102e-05
CTSC	482.634397244657	-0.933611	0.139334273528524	-6.70050939555334	2.07694244825331e-11	4.56975e-10
CTSH	1181.13249783762	-1.50568	0.185259051283503	-8.12741203690507	4.38552652342543e-16	3.26216e-14
CTSL2	25.681166698958	-1.07066	0.205999801313901	-5.19738741898919	2.02108865338297e-07	1.62595e-06
CTSS	501.32235873236	-0.943757	0.148915475514605	-6.3375323981751	2.33474126782607e-10	3.98183e-09
CTSW	6.85340948219021	-1.33143	0.240359556372547	-5.53930575969618	3.03673050580327e-08	2.97847e-07
CTSZ	1019.16054193821	-0.901902	0.117921451743148	-7.6483274923209	2.03610125425297e-14	9.62792e-13
CTXN1	980.036883281105	-0.653137	0.145995594745581	-4.47367661083453	7.68859970579473e-06	4.11221e-05
CUL7	324.857992379741	-0.654863	0.112995244230936	-5.7954873543166	6.81230613979184e-09	7.7637e-08
CX3CR1	858.800796303117	-0.979479	0.197076999848878	-4.97003296405482	6.69415198054489e-07	4.71646e-06
CXCL10	32.7347565019505	-2.09035	0.327712667971853	-6.37859425715401	1.787208349931e-10	3.10833e-09
CXCL11	10.2506256983671	-1.5513	0.311455882011372	-4.9808130237267	6.33176942598379e-07	4.50705e-06
CXCL12	461.838102392382	-0.602166	0.13090718803009	-4.59994886364103	4.22594665949863e-06	2.44407e-05
CXCL14	772.174955379059	-1.1711	0.25040297661764	-4.67685581345989	2.91306930767002e-06	1.75674e-05
CXCL6	2.69878066554738	-2.66175	0.436801243055194	-6.09373432353108	1.10306673197321e-09	1.55151e-08
CXCL9	23.333710522233	-1.79431	0.289299360163829	-6.20227748201771	5.56518408821058e-10	8.45488e-09
CXCR3	2.14863192983004	-2.54485	0.43045481936076	-5.91199776557076	3.37983125193859e-09	4.18208e-08
CXCR6	3.95329276712741	-2.10625	0.322640734341033	-6.52814726042218	6.65882130354849e-11	1.29299e-09
CXorf64	8.3337981286132	-2.37325	0.339963522842608	-6.98089308447635	2.93309470982055e-12	8.03485e-11
CXXC4	79.3027694465101	0.83429	0.13458845478564	6.19882383610373	5.68866596636196e-10	8.61541e-09
CYB561	382.920211853742	-0.926169	0.150269819031452	-6.16337137552598	7.12122265422523e-10	1.05617e-08
CYB5R2	114.237044142452	-1.35291	0.263812342301057	-5.12830355762841	2.92364753424499e-07	2.26264e-06
CYBA	479.771889049578	-0.751737	0.132127287074337	-5.68949385943888	1.27416471332331e-08	1.36296e-07
CYBB	673.284984134199	-1.01036	0.169838302871545	-5.94897653223679	2.6982431834902e-09	3.44222e-08
CYBRD1	1276.74485583534	-0.698185	0.133216064122771	-5.24099848424668	1.59710027545054e-07	1.32051e-06
CYP11A1	17.4300519010731	-1.28289	0.247012368965246	-5.19363630168562	2.06225831166505e-07	1.65494e-06
CYP17A1	2.12273506694074	0.882982	0.203986215298971	4.32863421760895	1.50036885432939e-05	7.45175e-05
CYP1B1	197.172574660315	-0.974241	0.186404378510281	-5.22649273635376	1.72755602623512e-07	1.41692e-06
CYP21A2	56.8400028581763	-0.816134	0.159479111237977	-5.11749845571654	3.09614596798368e-07	2.38089e-06
CYP27A1	697.488783756849	-0.87108	0.168110696531756	-5.18158745526829	2.20005391471754e-07	1.75545e-06
CYP2A6	6.1196952683072	1.34639	0.236421409657363	5.6948930472344	1.23449282196451e-08	1.32272e-07
CYP2S1	18.1501570252265	-0.948824	0.133337728719672	-7.11594845997519	1.11145826464384e-12	3.41742e-11
CYP39A1	19.250929515782	-1.00851	0.168649100189367	-5.97996006070753	2.2319233700863e-09	2.9048e-08
CYP3A5	14.1773662704162	-0.873672	0.181951691046502	-4.80166998553705	1.57347857216164e-06	1.01538e-05
CYP4F12	16.3172795495435	-2.81808	0.324603488719482	-8.6816215598625	3.90165756839469e-18	4.6579e-16
CYP4F3	17.0198855753277	-1.53717	0.294554937197735	-5.21862768670821	1.80253691671168e-07	1.47445e-06
CYR61	997.572545249643	-1.69248	0.251751294206726	-6.72281969129754	1.78241100172992e-11	3.96228e-10
CYTH4	212.825187822578	-0.77068	0.1434672609595	-5.37182095980781	7.79454804435443e-08	6.93817e-07
CYTIP	36.5524945214865	-1.09185	0.168809280456824	-6.46793290470482	9.93525908026179e-11	1.8458e-09
CYTL1	65.7252417687706	-1.41356	0.190943288353064	-7.40305895683762	1.33082627124092e-13	5.10678e-12
D2HGDH	636.910822264668	0.624643	0.106002302351561	5.89272986592175	3.7986712690541e-09	4.64682e-08
DAPP1	16.1737316884881	-1.11179	0.183526177550399	-6.05795249422967	1.37865095343634e-09	1.89638e-08
DARC	103.751838131906	-1.14046	0.171150490084083	-6.66349405302837	2.67392871560752e-11	5.73324e-10
DCDC2	19.7517053630806	-1.44799	0.195906977779053	-7.39123712580355	1.45468925422077e-13	5.54905e-12
DCTD	535.476158042302	-1.19746	0.130793010377444	-9.15534623020675	5.41837761779764e-20	1.09158e-17
DCX	2415.46572329877	0.755232	0.155212925407	4.86578082811252	1.14005802604255e-06	7.57949e-06
DDB2	137.955982234397	-0.662509	0.0997827091816387	-6.63951292642903	3.14721402900351e-11	6.62319e-10
DDIT4L	59.6340025490317	-3.46392	0.304780672972854	-11.3652766334665	6.2266894777413e-30	1.33805e-26
DEDD2	233.562794103745	-0.783092	0.11474598607852	-6.82457403032284	8.81865893093312e-12	2.14802e-10
DEF6	118.921578776809	-0.955274	0.135686180686806	-7.04031749860281	1.91802278009829e-12	5.48112e-11
DENND1C	54.8447844327037	-1.00249	0.135355658748057	-7.40631432252624	1.29857842927811e-13	4.99294e-12
DENND2D	32.1757075941226	-1.13672	0.1786242431117	-6.36375559276614	1.96879338372848e-10	3.39362e-09
DEPDC1	26.3707941735139	-1.76038	0.243581322499193	-7.22706101550706	4.93558391348457e-13	1.65432e-11
DEPDC1B	39.3209867740641	-0.85915	0.198986675547759	-4.31762593288712	1.57716425497883e-05	7.78916e-05
DERL3	21.4024980445069	-1.59546	0.180256537522036	-8.85105759310101	8.66938038074028e-19	1.24197e-16
DES	35.9014728874599	-2.73092	0.363929415867643	-7.50398895489561	6.1904522726576e-14	2.59141e-12
DGKG	1438.90997064633	0.868151	0.152003587962906	5.7113850049606	1.12060407032693e-08	1.21483e-07
DHDH	6.05148131929717	-1.24126	0.250417060536871	-4.95677976158368	7.16711401872512e-07	5.00043e-06
DHH	3.76316821368181	-1.16979	0.254749491038041	-4.59192340636521	4.39179560002786e-06	2.52639e-05
DHRS3	734.276182896446	-0.944454	0.133382955494279	-7.08076785986799	1.43357875939077e-12	4.25236e-11
DIAPH3	49.3614087899741	-0.815871	0.146828377348085	-5.55662836122972	2.75035481843617e-08	2.72919e-07
DIRAS3	92.6259774714098	-2.0132	0.192541627566569	-10.4559434992224	1.37622132628057e-25	9.17797e-23
DISC1	720.038674942638	0.891752	0.118977043673086	7.49515601398575	6.62195499740793e-14	2.76606e-12
DKFZp686O24166	217.775279205742	0.982319	0.162163880363819	6.05757076761766	1.3819255219555e-09	1.89953e-08
DKK2	21.4645589449017	-1.66339	0.263006179721225	-6.32454478834288	2.53980180047757e-10	4.29744e-09
DKKL1	1.09669511614311	-2.4564	0.44225763253506	-5.55422236531717	2.78850326468397e-08	2.76137e-07
DLEC1	55.0455750931807	-1.45337	0.201753160812753	-7.20369351181088	5.86030123348898e-13	1.92425e-11
DLGAP5	42.6995153740092	-1.3687	0.304107213070465	-4.50070975456142	6.77269337975144e-06	3.68137e-05
DLL1	1737.82112793404	0.603664	0.125182619818228	4.82226872756181	1.41934550227418e-06	9.24559e-06
DLX1	136.70478047833	-1.38229	0.269721578352822	-5.12489019914938	2.97711190648975e-07	2.2985e-06
DMC1	1.87759197509575	-1.4867	0.306224323620424	-4.8549304439822	1.20429006960868e-06	7.96817e-06
DMD	725.283085707562	-0.627412	0.122142882236543	-5.13670696135197	2.79594411041187e-07	2.17879e-06
DMKN	19.4141004622873	-1.24584	0.256379479114941	-4.85936332375559	1.1776384689363e-06	7.80518e-06
DMRTA2	23.0211811380422	-2.69113	0.314693673028894	-8.5515964823474	1.21397536979992e-17	1.30006e-15
DNAH11	6.54054654095032	-1.7064	0.27137226149082	-6.28803027526426	3.21519220312232e-10	5.26073e-09
DNAH5	51.5885100974173	-0.839589	0.197192278236355	-4.25771594884673	2.06526127798721e-05	9.87934e-05
DNAH6	33.2515189243398	-1.31905	0.201298629854255	-6.55271736171943	5.64993919530944e-11	1.11728e-09
DNAH9	168.419232844564	-0.950161	0.174163838742146	-5.45555783381303	4.88193384071925e-08	4.5502e-07
DNAJA4	628.831446542289	-0.927188	0.19981321620426	-4.64027367746964	3.47948062118726e-06	2.05727e-05
DNAJC22	18.8431753482661	-1.14783	0.169726571127346	-6.76283024059594	1.3532176557132e-11	3.11864e-10
DNALI1	469.257005144963	-1.1148	0.127019187032098	-8.77665493799519	1.68408704322823e-18	2.26182e-16
DNASE1L3	8.23027754464485	1.72746	0.35634128860823	4.84777297559418	1.2485516456898e-06	8.22725e-06
DOCK2	259.466731820659	-0.836368	0.153071094984161	-5.46391657145353	4.65742490434689e-08	4.36619e-07
DOCK7	985.609780957928	-0.861353	0.114744084381387	-7.50673166919097	6.06218083391027e-14	2.5543e-12
DOCK8	325.207317334364	-0.7787	0.151545705417033	-5.13838435042853	2.77110652477751e-07	2.16189e-06
DOK3	92.8547421976338	-0.691814	0.118551800812246	-5.83554265453944	5.36157776927864e-09	6.31504e-08
DPH3B	17.9357101539848	-0.644123	0.145794327523061	-4.41802562206728	9.96066152421989e-06	5.19103e-05
DPP4	18.6793059548075	-1.4945	0.220542066095637	-6.77649805445704	1.23123718520225e-11	2.86893e-10
DPY19L1	1207.71302731825	-0.627814	0.104220413459193	-6.02390306492706	1.70260361329006e-09	2.2969e-08
DPYD	136.424301319248	-1.01691	0.146401616233517	-6.94601742575222	3.75742377657269e-12	9.96825e-11
DSC2	53.2843145166455	-0.654158	0.138155929162719	-4.73492328264971	2.19137973848306e-06	1.36802e-05
DSCAM	1575.43492212729	0.875601	0.137213110658363	6.38132247467027	1.75565164806762e-10	3.06447e-09
DSCAML1	1691.85688223994	0.715652	0.137331833880076	5.21111376657172	1.87710293544039e-07	1.52534e-06
DSG2	11.4899350427107	-2.80554	0.394473859269398	-7.11210436087607	1.14286786829918e-12	3.50499e-11
DUSP10	117.678653460177	-1.05197	0.127503548282839	-8.250537954192	1.57683086947222e-16	1.2977e-14
DUSP23	113.149194506563	-0.901417	0.126289970165577	-7.13768059940199	9.49188697384214e-13	2.98008e-11
DUSP27	21.3231298100722	-0.765659	0.166864406966564	-4.58850728286577	4.46426735778715e-06	2.56503e-05
DUSP4	124.17470394251	0.978415	0.205110142857099	4.77019105405686	1.84051269073818e-06	1.17168e-05
DUSP9	154.760464783018	0.90708	0.188022792775461	4.82430750269451	1.40490527109621e-06	9.16078e-06
DYDC2	10.6808555488911	-1.7602	0.324555621233581	-5.42342790090787	5.84668043096959e-08	5.34128e-07
DYNLRB2	14.3732658986419	-1.16242	0.195649335721805	-5.94135469224325	2.82676238823139e-09	3.57551e-08
DYNLT3	373.985319796912	-1.01644	0.174148715208486	-5.83664396433832	5.32627420977989e-09	6.27728e-08
E2F2	57.5493503374041	-1.25993	0.236827298476574	-5.32002105702819	1.03755242541943e-07	8.97418e-07
E2F7	38.5668208383949	-1.26513	0.235556838312515	-5.37081283289084	7.83825302379489e-08	6.96654e-07
EAF2	60.2267301959577	-0.659329	0.11777559912115	-5.59818312106386	2.16609886487663e-08	2.19792e-07
EBF3	4.85144280892387	-1.26644	0.25002075498313	-5.06533766789808	4.0767705765303e-07	3.04185e-06
EBF4	1356.30055209111	0.603961	0.0988555588939909	6.10953462265419	9.99220780283825e-10	1.41991e-08
EBI3	70.2219979135172	-0.708693	0.133872992618153	-5.29376869721518	1.19820971061419e-07	1.02266e-06
ECE1	1655.99749447983	-0.634921	0.0880832743672177	-7.20819107746915	5.67000311510938e-13	1.86811e-11
ECHDC2	144.971756427532	-1.25695	0.161027566097223	-7.80582312375098	5.91144390823148e-15	3.17651e-13
ECHDC3	26.1145156781358	-1.06656	0.18357076436661	-5.81006215823911	6.2449651644684e-09	7.18487e-08
ECM2	257.340235198451	-1.89085	0.184870483259483	-10.227952095639	1.48629076672031e-24	7.98468e-22
EFEMP1	2084.35343990265	-0.828045	0.17563604372593	-4.71455119950494	2.42244088846745e-06	1.49394e-05
EFEMP2	448.748084527046	-1.02278	0.159284095712995	-6.4211219058215	1.35273640933299e-10	2.42016e-09
EFHC2	33.1328909890583	-1.46668	0.253942735988879	-5.77561490616544	7.66725534869687e-09	8.61119e-08
EFHD2	1458.08688419106	-0.581487	0.119502995814521	-4.86587578897753	1.13951070173585e-06	7.57949e-06
EFNA4	32.9521873655516	-1.09644	0.161274999081345	-6.79857027543968	1.05662468913015e-11	2.51355e-10
EFNB2	419.939992631642	-0.913688	0.130353818550142	-7.00929108471589	2.39528658207453e-12	6.67505e-11
EGF	30.3648280828927	-0.781951	0.175226662334787	-4.4625094984016	8.10053366183512e-06	4.30515e-05
EGFL6	5.09183075952584	-1.6531	0.338624743941349	-4.88181398760221	1.05114387004606e-06	7.04405e-06
EID2	295.049103811164	-0.614544	0.0719380253426427	-8.54269226110039	1.3113027408055e-17	1.38582e-15
EID3	18.5848965830948	-1.56254	0.214512333910708	-7.28416553422285	3.23667400030398e-13	1.12788e-11
ELF4	68.324001584354	-1.28914	0.160305132989591	-8.04177854581992	8.85438040071595e-16	6.13777e-14
ELOVL1	1155.045326442	-0.828281	0.144629157251449	-5.72693114136021	1.02263652151844e-08	1.11992e-07
EMB	103.508046107976	-1.05293	0.157565404384113	-6.68251310661801	2.34878946841941e-11	5.13283e-10
EMILIN1	483.174981993319	-0.90672	0.139473791982166	-6.50100655577341	7.97843544527737e-11	1.52023e-09
EMILIN2	102.902031811028	-1.45799	0.203595606538807	-7.1612036844236	7.99717203704131e-13	2.56493e-11
EMILIN3	192.344655599255	-2.55272	0.325001786040122	-7.85447961187598	4.01435364126574e-15	2.2874e-13
EMP1	1447.13039405688	-1.28459	0.205409873192346	-6.25381220432194	4.00552631399038e-10	6.41813e-09
EMP3	160.886123844919	-2.59881	0.210586231896763	-12.3408137379567	5.46012323941063e-35	2.63997e-31
EMR1	10.1372068766862	-1.45584	0.334833535198108	-4.34794862962733	1.37416778712317e-05	6.90296e-05
EMR2	56.997536311286	-0.894262	0.156492382971108	-5.71441526726271	1.10081882058932e-08	1.1974e-07
EN2	22.9619375442898	-1.61727	0.240136513109958	-6.73480738160389	1.64147240907021e-11	3.67431e-10
ENPP1	34.6758169531848	-1.03305	0.168346172892092	-6.13648246168085	8.43686734981871e-10	1.22132e-08
EOMES	1.88708599785696	-2.65601	0.401560586814924	-6.6142146319507	3.73529461778725e-11	7.69105e-10
EPHA4	864.399897638915	-1.02952	0.210050561440486	-4.90131162163337	9.51989083436577e-07	6.46924e-06
EPHA7	98.8852194739196	-1.72038	0.260935633427026	-6.5931135471887	4.306969108815e-11	8.75886e-10
EPHB2	361.630546991425	-0.629552	0.116352772222669	-5.4107149941177	6.27736091728813e-08	5.68873e-07
EPHX2	185.589098816785	-1.15832	0.162111419588178	-7.14520004633708	8.98649197654186e-13	2.83522e-11
EPHX3	3.02092932871727	-1.42688	0.203871197049331	-6.99894375013572	2.57899369362959e-12	7.12539e-11
EPN2	5872.6925995138	0.808286	0.104966613455084	7.70041412202202	1.35625963731775e-14	6.79535e-13
EPS15	1840.57625887255	-0.739119	0.114566427208226	-6.45144923063162	1.10785564632575e-10	2.03282e-09
EPSTI1	53.1966354113232	-0.981177	0.171594623737772	-5.71799144674283	1.07790567229628e-08	1.17645e-07
ERP27	6.17655578947696	-1.27158	0.269503207858782	-4.71824710279789	2.37885446087017e-06	1.47081e-05
ESM1	29.6545785814342	-1.59481	0.362563084005891	-4.39870521453255	1.088986243315e-05	5.62076e-05
ESPNL	3.37345680329672	-1.0546	0.244524555339378	-4.31284980457709	1.61163607468959e-05	7.93509e-05
ESRP1	3.32507835134466	-1.55914	0.339849449615848	-4.58773785672706	4.48074781101508e-06	2.57221e-05
ESYT1	892.722060334918	-0.582571	0.0741747944426816	-7.854030526894	4.02876160462877e-15	2.2874e-13
ETS1	1951.69182484664	0.640744	0.124427485007715	5.14953777786573	2.61129176523052e-07	2.04712e-06
ETV5	2633.22121234475	1.02869	0.180210171193959	5.70830233039188	1.14108598194013e-08	1.23634e-07
ETV7	9.27411209941363	-0.954237	0.193246032020907	-4.9379363460957	7.89536029340876e-07	5.45929e-06
EVC2	16.2718066760163	-2.19008	0.243865510439113	-8.9806836855156	2.6908941118452e-19	4.52538e-17
EVI2B	200.13143618312	-0.871958	0.148335402614414	-5.87828968724157	4.14527029724238e-09	5.02946e-08
EVPL	8.24706109436936	-1.40011	0.325378301297888	-4.30301887685169	1.68486488904978e-05	8.25362e-05
EYA2	194.18035184986	-0.915821	0.177132973479383	-5.17024736463325	2.33784329047367e-07	1.85e-06
EYA4	46.6276315303594	-2.75759	0.277170293815986	-9.94909057797888	2.54498219494576e-23	1.02542e-20
F11R	266.12203086527	-0.621494	0.123419270336451	-5.03563491433559	4.76267539361881e-07	3.49564e-06
F13A1	165.007152072314	-1.14222	0.221188548208898	-5.16399478572286	2.4173443271845e-07	1.90822e-06
F2RL1	76.3524740088783	-1.89966	0.228189910665743	-8.32490701783668	8.4394961052369e-17	7.45296e-15
F2RL2	26.1476642557394	-1.92955	0.292354012096664	-6.60004564201125	4.11031219215805e-11	8.37655e-10
F3	1138.34373534127	-1.17872	0.166220673015547	-7.0913161008875	1.32842522174286e-12	3.97705e-11
FABP3	264.094060950115	-0.844133	0.184578102677248	-4.57330904705104	4.80081209390712e-06	2.73001e-05
FABP5	45.973678329097	-2.28105	0.23444706679939	-9.72946768011642	2.25771321247936e-22	8.23852e-20
FAH	194.716519478726	-0.909521	0.117657858604082	-7.73021682271885	1.0736356159004e-14	5.46424e-13
FAM106C	18.3750085248253	0.888624	0.171842169212344	5.17116297762832	2.32641550495789e-07	1.84246e-06
FAM109B	43.5145023860043	-0.887328	0.115579713382503	-7.67719283624019	1.62612555386756e-14	7.92173e-13
FAM110C	3.94942543433583	-1.89309	0.390774161360705	-4.84445211976291	1.26961529250793e-06	8.34898e-06
FAM113B	46.9179348091366	-1.15372	0.132623167792163	-8.69922766538573	3.34150543648859e-18	4.06445e-16
FAM114A1	82.328994606402	-0.746578	0.14930609828661	-5.00032144977383	5.72348100173289e-07	4.12158e-06
FAM129A	211.16073804704	-1.05419	0.163003323140379	-6.4673115696856	9.97618206038545e-11	1.85163e-09
FAM133A	218.021668505592	0.612952	0.141875849272525	4.32033891682884	1.55789744263984e-05	7.70779e-05
FAM155A	1136.12410140156	0.735465	0.125560895280397	5.85743634510206	4.70066897736091e-09	5.62916e-08
FAM159A	4.2532243373679	-1.09169	0.188531432985899	-5.79047491521513	7.0187680616416e-09	7.96146e-08
FAM164C	37.5320205461377	-0.756561	0.137361932967706	-5.50778925085933	3.63368048580319e-08	3.51729e-07
FAM168A	1150.7811876138	0.632476	0.127533628150426	4.95928782680332	7.075207445371e-07	4.94344e-06
FAM177B	2.52673316119951	-1.16546	0.270043402567057	-4.31582921227592	1.59004883355357e-05	7.84678e-05
FAM178B	38.4567981026541	-1.3057	0.243308020245782	-5.3664608356095	8.02966259867768e-08	7.12567e-07
FAM180B	5.57937678900854	-1.35235	0.247082226362522	-5.47329488588287	4.41744119104622e-08	4.17563e-07
FAM181A	90.3167292080465	-1.44495	0.244795487390901	-5.90267349021236	3.57657683093525e-09	4.40299e-08
FAM184B	177.118116675516	1.19937	0.262749845323974	4.56470294797834	5.00202101680051e-06	2.82698e-05
FAM188B	109.254241139823	-1.00938	0.1646265567463	-6.13133610093552	8.71440823930375e-10	1.25399e-08
FAM19A3	4.10658197631903	-2.4448	0.334025678208803	-7.31918445064678	2.49482486201588e-13	8.96839e-12
FAM26F	24.3974104344034	-1.20772	0.173611301492514	-6.95645383013788	3.48944541402673e-12	9.32125e-11
FAM3B	3.2888280577356	-1.50856	0.320767441578819	-4.70295683744118	2.56420642481323e-06	1.56886e-05
FAM43B	148.411833295621	-0.724795	0.147293225719733	-4.92076196045477	8.62079287775006e-07	5.90599e-06
FAM46B	24.0454677980088	-1.59333	0.225007468476427	-7.08124177836523	1.42868385041644e-12	4.24435e-11
FAM50B	148.312160656578	-1.09853	0.166742661228789	-6.58817267036403	4.45272632753386e-11	9.01735e-10
FAM53A	9.52628535063206	-1.17256	0.168324245590214	-6.96608956998148	3.25871716569279e-12	8.85163e-11
FAM69A	759.116035476029	-0.68009	0.119176264506366	-5.70658797484872	1.15263344086511e-08	1.24644e-07
FAM70B	20.2440829021466	-0.971474	0.181201768217926	-5.36128120894787	8.26337638795199e-08	7.29743e-07
FAM71E1	44.0361986691379	-0.652104	0.153112525396096	-4.25898761471062	2.05354846859353e-05	9.8306e-05
FAM72A	8.57411218421221	-0.716228	0.150298530505347	-4.76536687756647	1.88510325127994e-06	1.19652e-05
FAM72B	49.3876577743723	-0.623807	0.116294612440359	-5.36402586270317	8.13872429981351e-08	7.20334e-07
FAM76A	183.483556146318	-0.624395	0.0709665822681862	-8.79844154343659	1.38729236221351e-18	1.88945e-16
FAM81B	2.84156534649313	-2.51965	0.538168764901136	-4.68190279742345	2.8422425493752e-06	1.72155e-05
FAM83D	50.556280350075	-1.21982	0.198188385218781	-6.15483973613282	7.51534544116099e-10	1.10446e-08
FAM83H	77.8677487160937	-0.911099	0.149849470912974	-6.08009605118977	1.20110575519649e-09	1.67479e-08
FANCA	123.829545055285	-0.751043	0.167465273720668	-4.48477099251389	7.2992286098081e-06	3.93662e-05
FANK1	28.1505414312861	-0.998188	0.157446825181096	-6.339845130205	2.29996239127437e-10	3.92597e-09
FAP	25.1237318634504	-1.68585	0.245748235234875	-6.86007474490053	6.88245276295050e-12	1.71308e-10
FBLN1	698.721720845085	-1.17349	0.188636741038956	-6.22087201431077	4.94399339578841e-10	7.72349e-09
FBLN2	184.266395280426	-0.884584	0.154840685086832	-5.71286540434807	1.11089542256267e-08	1.20701e-07
FBLN5	291.660672287032	-1.06413	0.152427597003955	-6.9812463831638	2.92572689432302e-12	8.02604e-11
FBP1	44.6658711831912	-0.903679	0.163752336716394	-5.5185739907199	3.4176157186505e-08	3.32144e-07
FBXL13	6.72978929251389	-0.922102	0.166715232293313	-5.53100134136148	3.1840789045371e-08	3.10697e-07
FBXO17	104.89782795063	-1.47678	0.189057974677886	-7.81123052525011	5.6632324128012e-15	3.06798e-13
FBXO32	400.436208173975	-0.931022	0.13835534970112	-6.72920658793627	1.70590708213591e-11	3.80533e-10
FCER1G	286.428905897339	-0.945013	0.149824856347447	-6.30745184631125	2.83666791436111e-10	4.72127e-09
FCGBP	1689.29298287656	-1.2014	0.270613754228323	-4.43954455693516	9.0149449938457e-06	4.73903e-05
FCGR1A	183.500217299105	-0.848874	0.174108254563743	-4.87555466661275	1.08503142230554e-06	7.24957e-06
FCGR1B	205.656794516693	-0.785098	0.165561909934525	-4.74202029976399	2.11597415374512e-06	1.32522e-05
FCGR1C	69.8472375805357	-0.829065	0.179213850307359	-4.62612189320908	3.72576080296657e-06	2.18352e-05
FCGR2A	380.896435173205	-1.24987	0.157591622682656	-7.93107389659943	2.17258885680149e-15	1.32968e-13
FCGR2B	24.2193995889378	-1.60241	0.292754940206789	-5.47354682038264	4.41116266401778e-08	4.17377e-07
FCGR2C	11.6895750631153	-1.49849	0.261607647681112	-5.72802264703318	1.0160800454252e-08	1.11337e-07
FCGR3A	743.340805785548	-1.16599	0.183347592678564	-6.35946384225981	2.02459179867993e-10	3.47741e-09
FCHSD1	103.332690807993	-0.789666	0.12581823045451	-6.27624277076816	3.46852464821892e-10	5.63708e-09
FERMT3	231.898960982852	-0.724992	0.132786253250884	-5.45984518293528	4.76549953867801e-08	4.45025e-07
FES	123.670609980027	-0.785525	0.104174269286672	-7.54049089939048	4.68205578449391e-14	2.01673e-12
FGD2	150.790309791373	-0.612187	0.139808644418105	-4.37874710084262	1.19363549322168e-05	6.09261e-05
FGF1	3410.39924519059	-0.721998	0.158381918838671	-4.5585890099656	5.1498437967193e-06	2.89782e-05
FGFBP2	17.3781799848618	-1.93258	0.240354787009216	-8.04052685886793	8.94530204673399e-16	6.15666e-14
FGFBP3	830.590604291433	1.41585	0.15894147984237	8.90796478727028	5.19779000533596e-19	7.67368e-17
FGFR3	2015.99245866209	-0.910237	0.204071190362781	-4.46038992446263	8.1810669870484e-06	4.34198e-05
FGFRL1	456.978249872805	-0.994341	0.158627336014876	-6.26840926000406	3.64755074199528e-10	5.89884e-09
FGL2	219.682237571507	-0.817357	0.158056420466732	-5.17130110025456	2.32469628525638e-07	1.84196e-06
FHAD1	19.3165738704231	-1.93281	0.241931270760546	-7.98910164329169	1.35925593924681e-15	8.79198e-14
FHDC1	561.868266272757	1.27977	0.159094233304934	8.04409892576096	8.68823162781194e-16	6.04426e-14
FHL2	143.373385730741	-1.14675	0.196930342523767	-5.82313843279362	5.77526789636078e-09	6.72448e-08
FHL3	276.538418702453	-0.581726	0.106235074971691	-5.47584050763671	4.35439760023964e-08	4.12208e-07
FHOD1	206.686422576804	-0.702846	0.122920659172105	-5.71788619029766	1.07857339765357e-08	1.17651e-07
FIBCD1	129.114984094949	0.952309	0.170681924122354	5.57943719816796	2.41298045446271e-08	2.41798e-07
FILIP1L	271.211340591159	-0.894594	0.153331297848963	-5.83438461380106	5.39894542774073e-09	6.35131e-08
FKBP1B	110.49149598684	-0.931011	0.190422087944062	-4.88919745748193	1.01247898718993e-06	6.82277e-06
FKBP5	1266.84648951053	-0.92713	0.199580562919839	-4.64539396961405	3.39428072625477e-06	2.01058e-05
FKBP9	917.775347281577	-1.00083	0.141332524312496	-7.08138665759526	1.42719072801397e-12	4.24435e-11
FKBP9L	19.759757159239	-0.640247	0.140995893831315	-4.54088931851304	5.6017435252049e-06	3.12123e-05
FLJ26850	7.12756753684448	-1.27846	0.186259342116307	-6.8638626770888	6.70230628359399e-12	1.68123e-10
FLJ34503	2.52921496612532	1.14847	0.22072136903033	5.2032542004779	1.95828711494749e-07	1.58333e-06
FLJ36777	4.6279493361738	-0.669088	0.146318831881645	-4.57280935340004	4.81227967617848e-06	2.73412e-05
FLJ42875	69.7852942345434	-1.39857	0.22179526150633	-6.30569528850961	2.86902993655909e-10	4.75875e-09
FLNA	5541.95227097669	-0.812029	0.134114706595257	-6.05473372835915	1.4065012039569e-09	1.92647e-08
FLNC	919.599762028067	-2.487	0.223305902486937	-11.1371846312126	8.26922153535064e-29	1.23021e-25
FLRT1	801.135851486207	0.644219	0.112344376745491	5.73431910584163	9.79048520632182e-09	1.07584e-07
FLVCR2	350.383169103806	0.71295	0.143626097082884	4.96392854374739	6.90813684708974e-07	4.84256e-06
FMNL1	327.693579079923	-0.907642	0.140078506140977	-6.47952074855618	9.20144137958677e-11	1.72773e-09
FMOD	149.943164079302	-1.96972	0.239145176586214	-8.23648614483628	1.77342210743043e-16	1.42908e-14
FNBP1L	623.94617654926	-1.13896	0.141522944883702	-8.04789115048781	8.42328110650493e-16	5.88109e-14
FNDC1	16.3032112357553	-1.84925	0.319234666850589	-5.79275595963415	6.92406841502182e-09	7.87715e-08
FOLR1	24.0690299675024	-0.956798	0.202312226470207	-4.72931598915534	2.25277528297523e-06	1.40227e-05
FOLR2	415.805637184762	-0.722499	0.16867330994352	-4.28342033996494	1.84042009415409e-05	8.92297e-05
FOXC1	181.070282661876	-0.69879	0.139938393209946	-4.99355274147812	5.92785878426083e-07	4.24864e-06
FOXD1	110.705291722764	-1.0003	0.213781859165266	-4.67906599289039	2.88184683690115e-06	1.74172e-05
FOXG1	1157.41957557414	0.650978	0.151374371885806	4.30044757047768	1.7045349682206e-05	8.33941e-05
FOXJ1	186.095821908804	-1.46293	0.199739091120203	-7.32420253532543	2.4032350015406e-13	8.67137e-12
FOXP2	39.0473077651117	-1.18538	0.264342991632634	-4.48426625978068	7.31652572132257e-06	3.94485e-05
FPGT	156.669528188361	-0.715471	0.0860007541967468	-8.31936292297881	8.84373692300654e-17	7.70441e-15
FPR1	211.754783471845	-1.3417	0.190241553309822	-7.05260470054552	1.75599188742568e-12	5.08396e-11
FPR2	4.50344522416102	-1.42429	0.32570472659862	-4.37294903998312	1.22579344944657e-05	6.23977e-05
FRAS1	113.246682169721	-1.00149	0.218544105549855	-4.58253059862022	4.59382462157123e-06	2.62864e-05
FRMPD1	177.053585406378	0.673144	0.129412661214246	5.20152780960713	1.9765688865839e-07	1.59611e-06
FRRS1	4.08233077487162	-1.64584	0.291222394942708	-5.65147459748355	1.59077199251531e-08	1.67013e-07
FRZB	236.256090899331	-0.825891	0.122124662516392	-6.76269006347687	1.35452805743777e-11	3.11864e-10
FSIP1	17.9629190732039	-0.694428	0.13703275413358	-5.06760691201371	4.02848245273668e-07	3.01396e-06
FSTL1	1586.68013025146	-1.44997	0.165960920398669	-8.73682997898043	2.39742893930329e-18	3.07061e-16
FTL	20954.6721896753	-0.906623	0.109432138278589	-8.28479621424326	1.1831149325187e-16	1.00357e-14
FUCA1	301.987440485792	-0.88774	0.104172484714808	-8.52182979385336	1.57052077812972e-17	1.57378e-15
FUCA2	376.554455888142	-0.940035	0.126758606555814	-7.41594778287198	1.20758073987902e-13	4.68028e-12
FXYD1	289.005823265391	-1.21917	0.236211352187994	-5.16133316671374	2.45197351110594e-07	1.93398e-06
FXYD3	14.495578505246	-1.58197	0.23667257892413	-6.68422685543995	2.32146954786359e-11	5.07887e-10
FXYD5	290.626323080778	-0.797216	0.138607836271186	-5.75159175722634	8.84070758787038e-09	9.78142e-08
FYB	285.419253491613	-0.799023	0.147515070953612	-5.41655147045035	6.07595055518529e-08	5.52723e-07
FZD2	67.2872570234361	-0.782402	0.168246226257852	-4.65033810015969	3.31391305673431e-06	1.96961e-05
FZD5	106.29362625256	-0.613583	0.112390693998808	-5.45937632647005	4.77810028768349e-08	4.45987e-07
FZD6	105.772589818829	-0.811174	0.132288898314626	-6.13183728548075	8.68699293578178e-10	1.25191e-08
FZD8	104.311172902927	-0.813671	0.152487745454017	-5.3359795686367	9.50301029314963e-08	8.28621e-07
FZD9	39.4727206076257	-0.725712	0.146385353303696	-4.95754200591997	7.13906104246392e-07	4.98446e-06
G0S2	17.7411523373281	-1.98896	0.285560917218209	-6.96509568756255	3.28180613568481e-12	8.90184e-11
GABBR1	14572.6806186815	0.588138	0.117775772277163	4.99370987910553	5.92303531109981e-07	4.24761e-06
GABRE	27.4903146595075	-1.20442	0.211397113462606	-5.69741336821827	1.21638754756552e-08	1.30622e-07
GADD45A	582.564011475271	-0.694665	0.153414434649929	-4.52802817718715	5.9536644183208e-06	3.28779e-05
GALM	117.932869184994	-0.847152	0.123964718566315	-6.83381376336584	8.26863573398995e-12	2.02169e-10
GALNT13	3568.02576842728	0.670678	0.146902711087873	4.5654576039313	4.98405921486878e-06	2.81765e-05
GALNT3	15.8739766152004	-1.32712	0.19504719719555	-6.80410099905894	1.01682186818175e-11	2.42782e-10
GALNT4	122.739603506834	-0.700226	0.110995859294546	-6.30857431061345	2.81617511338121e-10	4.69929e-09
GALR1	73.1916197895962	1.21494	0.209756169329822	5.79213238856965	6.94983240328258e-09	7.90181e-08
GAPT	17.422935436963	-1.58784	0.235494790269455	-6.74255773220698	1.55622373199414e-11	3.49969e-10
GAS2L2	7.63575539864265	-1.87844	0.286003244930223	-6.56788829379584	5.10338011629527e-11	1.01962e-09
GAS2L3	16.4931037842825	-1.29282	0.245969560275876	-5.25600520575023	1.47218124455057e-07	1.23309e-06
GAS6	946.442230081405	-0.594657	0.0911992222443885	-6.52041979162061	7.01108910345798e-11	1.35054e-09
GAS7	4266.60976565978	-0.824965	0.177398992656711	-4.6503390918604	3.31389712105203e-06	1.96961e-05
GATA3	6.67147394284889	-2.29249	0.350127022148266	-6.54758152291932	5.84763016366247e-11	1.15284e-09
GBGT1	68.3152267330255	-0.701407	0.117862700940849	-5.9510485437195	2.6643004123873e-09	3.40566e-08
GBP1	405.7661598794	-1.51916	0.196212683523889	-7.7424120064473	9.7548282648992e-15	5.01751e-13
GBP2	419.306974888236	-1.12813	0.189837996205704	-5.94259232823072	2.8054954180384e-09	3.55792e-08
GBP3	241.881231903729	-1.02947	0.185445131863263	-5.55136553158017	2.83446701945656e-08	2.80402e-07
GBP5	23.0671666948517	-2.22123	0.241452597043052	-9.19945798881799	3.59759806134181e-20	7.48146e-18
GCA	306.709672768622	-0.744524	0.118734346923955	-6.27050365581727	3.5988210002651e-10	5.83413e-09
GCET2	1.35386415503206	-1.69507	0.342912748113272	-4.94314222448131	7.68733598026347e-07	5.32306e-06
GCH1	42.3446096929316	-0.946463	0.153230993867607	-6.17670809806077	6.54519225607764e-10	9.80511e-09
GCHFR	40.6603688528341	-0.64149	0.121843933446546	-5.26485191832375	1.40302399602721e-07	1.18079e-06
GCK	35.3275979395606	-1.6652	0.208164430895454	-7.99942678162303	1.24999752469477e-15	8.13971e-14
GCLM	199.677223341771	-0.903991	0.111767249945183	-8.08815210470881	6.05767282680146e-16	4.42096e-14
GCNT1	44.5928712542293	-0.811671	0.128114344387523	-6.33551889511074	2.36543822635251e-10	4.02708e-09
GCNT2	335.002978402068	1.17394	0.137501220180269	8.53765277712217	1.36975800285687e-17	1.42425e-15
GCOM1	38.8835730948715	-1.14497	0.227169423747195	-5.04014203465636	4.65186470544799e-07	3.42471e-06
GDAP1L1	1607.80140207212	0.712067	0.148058718325643	4.80935631265781	1.51417092063551e-06	9.80056e-06
GDF15	37.2383312825178	-1.79506	0.297696465173266	-6.02982185557461	1.6414051162016e-09	2.2277e-08
GDF5	8.79120750743405	-1.25813	0.199776414236808	-6.29771091391582	3.02073190628262e-10	4.98047e-09
GDPD2	172.434056609725	-0.839915	0.188839291512584	-4.44777672245004	8.67636468884628e-06	4.58222e-05
GEM	327.852671005198	-1.1555	0.207042645882743	-5.58098365334542	2.39162123383022e-08	2.40156e-07
GEMIN8P4	24.1343191095068	-0.793573	0.088728098110127	-8.94387769372051	3.7574837044099e-19	5.93195e-17
GFI1	3.02518865861841	-0.984003	0.187475868472683	-5.24869087393682	1.53183870933629e-07	1.27532e-06
GFPT2	663.770476103676	-0.666913	0.156447064766637	-4.26286759908093	2.01820109957163e-05	9.68589e-05
GFRA1	1996.01203830491	0.958891	0.170659548735545	5.61873824714927	1.92357012876113e-08	1.97567e-07
GFRA2	282.038838455036	-1.18928	0.210703152795099	-5.64435226834813	1.65804280329612e-08	1.72865e-07
GFRA3	1.63914405934372	-1.45162	0.339060588603712	-4.28129252639212	1.85810911283848e-05	9.00196e-05
GIMAP4	315.524886635238	-0.762414	0.107593169158205	-7.08608191332496	1.37962170353729e-12	4.11123e-11
GINS2	102.995104893635	-0.860682	0.159530836281222	-5.39508339430428	6.84917335620187e-08	6.16681e-07
GINS4	59.6391652024738	-0.641778	0.118470540727764	-5.41719501449841	6.0541296772632e-08	5.51256e-07
GIPC2	6.43419584384335	-0.929878	0.175004242852435	-5.313462594632	1.07561522937311e-07	9.27436e-07
GJA1	7513.72714760603	-1.19144	0.186445361633832	-6.39029053888857	1.65570861541388e-10	2.90312e-09
GJA5	43.6696172626623	-1.30755	0.204567936767707	-6.39175860275995	1.63988647800344e-10	2.88284e-09
GJB2	48.7407495698134	-1.28769	0.296253980603922	-4.34658314272672	1.38274652008455e-05	6.93525e-05
GJB3	3.9860269651159	-1.04914	0.237821403775292	-4.41147905511686	1.02666886977031e-05	5.32191e-05
GJC1	184.856116713674	-0.866969	0.148573957482969	-5.83526639493703	5.37046919436494e-09	6.32166e-08
GJD3	16.454624068384	-1.35985	0.201445293692976	-6.75045987952366	1.47377270625368e-11	3.34539e-10
GLDC	1345.03030966608	0.738624	0.102720572668721	7.19061680442707	6.44992707627995e-13	2.0965e-11
GLDN	483.407832425164	-0.800789	0.174966130216443	-4.57682022259465	4.7209683014732e-06	2.69192e-05
GLI2	141.186512089077	-0.844282	0.158687542690363	-5.32040198149496	1.03538221314498e-07	8.95941e-07
GLI3	251.622161047915	-1.18107	0.147038157250769	-8.03242769307842	9.55625593195691e-16	6.50768e-14
GLIPR1	347.248434573413	-0.611562	0.136564539404183	-4.47818737179525	7.52795138814884e-06	4.03957e-05
GLIS3	407.046021645049	-1.15338	0.162259806719714	-7.1082330068629	1.1753800770313e-12	3.57419e-11
GLRA1	4.96717079794753	1.73303	0.323432369680531	5.35825746604695	8.40284390392845e-08	7.40032e-07
GLRX	262.309485036833	-0.614918	0.0960775586340297	-6.40022568731748	1.55147451674553e-10	2.75028e-09
GMFG	146.425311038531	-0.675711	0.119586868917236	-5.65037755324767	1.60095812966333e-08	1.67708e-07
GMPR	300.259505625074	-1.40447	0.190292677030126	-7.38059675616612	1.57581608210574e-13	5.96405e-12
GNA14	51.0967506264878	-0.880175	0.171805639108644	-5.12308314189436	3.00579729066742e-07	2.31602e-06
GNA15	79.5871725761883	-0.993292	0.137997390968328	-7.19790084352255	6.11465828248215e-13	1.99087e-11
GNASAS	2.60511394634715	-1.0897	0.231801384252935	-4.70099000329763	2.58903191116928e-06	1.58155e-05
GNG12	654.906281051002	-1.6776	0.158849524549193	-10.5609459600373	4.52082782046139e-26	3.80143e-23
GNG5	582.598267646055	-1.07231	0.115942706622171	-9.24863290684688	2.27382194345712e-20	5.05468e-18
GNGT2	15.1882358357633	-0.733276	0.136208650119196	-5.38347727369079	7.30604757717064e-08	6.52651e-07
GNLY	16.1897991747901	-1.55812	0.25116587442682	-6.20353682090806	5.52081156718755e-10	8.40728e-09
GPAT2	28.4317436745432	-0.927545	0.185090045097489	-5.01131624471042	5.40589892925235e-07	3.90663e-06
GPBP1L1	945.646806731578	-0.611008	0.0630875842876629	-9.68506948060009	3.48971167343481e-22	1.14392e-19
GPC3	42.61868082759	-1.49794	0.25465190210369	-5.8822944155062	4.0461776397369e-09	4.91848e-08
GPC4	518.437494855569	-0.809303	0.138499957352401	-5.84334712214464	5.11622512926611e-09	6.05926e-08
GPR1	2.51686109940378	-2.32482	0.509853696521186	-4.55977018555438	5.12096316298663e-06	2.88324e-05
GPR114	9.91697594496752	-1.417	0.213317092270188	-6.64270132444753	3.07985549510092e-11	6.52403e-10
GPR120	6.00687050515977	-1.20091	0.214143168267252	-5.60797834628644	2.04703630256152e-08	2.09027e-07
GPR126	69.1211863311893	-0.839617	0.178196452808516	-4.71174662822838	2.45602625661598e-06	1.51224e-05
GPR132	30.4077346282279	-1.0538	0.149511178285671	-7.04831624085219	1.81095697906258e-12	5.21189e-11
GPR143	27.4094203515847	-1.00019	0.204824853544906	-4.88313446560737	1.04412615709833e-06	7.0043e-06
GPR158	1862.52983043447	0.698502	0.132983343811919	5.25255327958548	1.50005051634632e-07	1.25228e-06
GPR160	30.2698459691509	-0.8392	0.126122290998286	-6.65385599807376	2.85512034112147e-11	6.08799e-10
GPR161	311.208973139209	0.619323	0.0887942498183492	6.97480876704643	3.06287151593167e-12	8.34309e-11
GPR17	4129.30381365618	1.15322	0.242462456163174	4.75627142466304	1.97201289462752e-06	1.24433e-05
GPR171	1.63358400472969	-1.62004	0.353866020373032	-4.57811848419759	4.69176931768095e-06	2.68062e-05
GPR173	467.128285380924	0.661156	0.0885015159774769	7.47055599440294	7.98566802497703e-14	3.26518e-12
GPR183	86.3358826441338	-1.15325	0.199970608832059	-5.76712032553328	8.06374816752726e-09	9.01983e-08
GPR27	44.7299817738585	1.05282	0.169366250869222	6.21624182520955	5.09203093055489e-10	7.90368e-09
GPR37	993.068892408856	-1.13357	0.228695963886699	-4.95666311764033	7.17141623969237e-07	5.00163e-06
GPR45	33.9251687117011	0.742906	0.15791681391624	4.70441334722153	2.54596970085365e-06	1.55968e-05
GPR55	7.75559546718343	-0.961394	0.209203649413088	-4.59549522197365	4.3172268663381e-06	2.48942e-05
GPR65	29.8638000877724	-1.31407	0.201000114438225	-6.53766702867041	6.24858445483155e-11	1.22564e-09
GPR77	7.47656877090633	-0.750842	0.174613459547653	-4.30002327072893	1.7078017547477e-05	8.35117e-05
GPR84	11.3354674031514	-1.29246	0.208628648221892	-6.19504489476814	5.82684192943989e-10	8.81088e-09
GPR88	78.9077124845784	-1.23092	0.227198859881807	-5.41778741603249	6.03411003979747e-08	5.49951e-07
GPR98	3362.16491584733	0.911562	0.177662436037729	5.13086741026509	2.88410018472583e-07	2.23683e-06
GPRC5A	16.742289004299	-2.03059	0.268230305466307	-7.57030906916576	3.72337304162086e-14	1.65161e-12
GPSM3	240.693423948828	-0.704079	0.111967028054706	-6.28826735287791	3.21028706032157e-10	5.25715e-09
GPX7	121.045043124163	-0.723986	0.109879836103388	-6.58888578151358	4.431395167681e-11	8.98356e-10
GPX8	56.9661931689303	-2.4074	0.251207211851777	-9.5833158201557	9.39783257493533e-22	2.79622e-19
GRB14	20.3186090429903	-1.63271	0.31296043310535	-5.2169794753269	1.81864402769389e-07	1.48533e-06
GREM1	163.254409921535	-1.69768	0.290306235147288	-5.84788514136736	4.978621185025e-09	5.92168e-08
GRID2	251.749179765379	0.902221	0.166510865856851	5.41838863418777	6.01385804147447e-08	5.48364e-07
GRID2IP	36.902439643702	1.14522	0.12151958114981	9.42417864182128	4.3348489021722e-21	1.16439e-18
GRIK1	155.742017774446	-1.65172	0.254265066230286	-6.49603720892381	8.24632698037924e-11	1.56818e-09
GRIK2	1612.422276432	0.889985	0.129353184703901	6.88027467692021	5.97372637693277e-12	1.51418e-10
GRIN3A	566.196322161491	0.965516	0.206833323445195	4.66808539240065	3.0401954728357e-06	1.82204e-05
GSDMA	5.85329076631614	-1.38517	0.311563490177312	-4.44587196330323	8.75360753026045e-06	4.61923e-05
GSDMC	13.2176365390396	-1.26971	0.282871535337443	-4.48863978173847	7.16793841289638e-06	3.87554e-05
GSDMD	220.046798332686	-0.785632	0.125784487129175	-6.2458548614233	4.21488427793747e-10	6.70361e-09
GSG1	1.14188427529811	-2.09173	0.4849318813887	-4.31344883706263	1.60727348261035e-05	7.92168e-05
GSN	6569.95935294084	-0.83706	0.124384895766889	-6.72959887827136	1.70131441321426e-11	3.79947e-10
GSTM5	258.031920221032	-1.17793	0.254132374747836	-4.6350922144222	3.5677839716488e-06	2.10369e-05
GUCA1A	7.09815585216471	-1.58674	0.371150868927716	-4.27518549664028	1.90978219583272e-05	9.22688e-05
GULP1	112.867675056889	-0.982903	0.202014424676521	-4.86551017211807	1.14161938965579e-06	7.58726e-06
GYPC	268.367705274837	-0.745857	0.135750030934995	-5.49434475412267	3.92163730550977e-08	3.76773e-07
GYPE	1.7960758575891	-1.3286	0.257507304319521	-5.15946601489337	2.47655171997383e-07	1.95035e-06
GZMA	6.95484889286462	-2.11305	0.301698296528816	-7.00386503815313	2.48995983210184e-12	6.88925e-11
GZMH	4.0341368001795	-1.75212	0.329098214702155	-5.32400804121982	1.0150541632651e-07	8.80715e-07
GZMK	5.10079718615498	-2.62764	0.371638793270102	-7.07040695504976	1.54479986899581e-12	4.54049e-11
H19	58.0150365659872	-1.34488	0.305922602180998	-4.39615385760911	1.10185845903005e-05	5.67313e-05
H2AFJ	174.037325622894	-0.689071	0.119782025686804	-5.75270858712507	8.78248027285893e-09	9.72256e-08
HAAO	29.3967301651837	-0.735522	0.137969760615396	-5.33103763318358	9.76531776424003e-08	8.49578e-07
HABP2	6.23378382688055	-1.37322	0.260445195846581	-5.27259264816647	1.34509895176331e-07	1.13947e-06
HAMP	29.6399873707134	-1.55903	0.272696511649805	-5.71710134738287	1.08356497028403e-08	1.18063e-07
HAVCR2	352.716192121169	-0.94763	0.149830714168633	-6.32466810074582	2.53777450631203e-10	4.29744e-09
HBA1	1104.83042834687	-1.25573	0.281993968492696	-4.45304799613744	8.46598206015895e-06	4.48021e-05
HBXIP	893.540880093108	-0.583786	0.0643676906224383	-9.06954430966818	1.19515799375829e-19	2.1806e-17
HCG11	115.370631738838	-0.842499	0.156216080227533	-5.39316543547295	6.92271605017581e-08	6.22433e-07
HCG22	25.5650502449353	-1.29787	0.257637185791101	-5.03759666441657	4.71413502113038e-07	3.46583e-06
HCK	224.557121891505	-0.772902	0.132119511133398	-5.8500222562515	4.9150724016349e-09	5.86051e-08
HCLS1	597.271529433141	-0.902499	0.133663314985554	-6.75202942811804	1.45791294572886e-11	3.31718e-10
HCP5	119.694412019933	-0.80598	0.146747882168898	-5.49227979170819	3.96778129602988e-08	3.80639e-07
HCST	60.7916348471094	-0.999433	0.151566972232384	-6.59400151661748	4.28127330664507e-11	8.71577e-10
HDAC1	629.532010745281	-0.747823	0.0898488850799847	-8.32311977710077	8.56777897409972e-17	7.53186e-15
HDAC4	2046.08288924513	0.75679	0.0768024537787144	9.85371569062888	6.60557650260978e-23	2.50494e-20
HDHD3	105.139448089473	-0.917639	0.166171635822743	-5.52223640473677	3.34711720770567e-08	3.2562e-07
HEBP1	343.586833665867	-0.828671	0.140830180757525	-5.88418483798711	4.00020595878461e-09	4.86566e-08
HERC5	155.658173548175	-1.12283	0.167645321393526	-6.69765154678432	2.11795545218712e-11	4.64941e-10
HERC6	383.939953541185	-0.690056	0.131616464003668	-5.24293040483482	1.58046163998764e-07	1.3096e-06
HEY1	4699.08094705842	0.712366	0.106932335913013	6.66184059477593	2.70419246733544e-11	5.7853e-10
HFE	25.6364052462105	-0.968861	0.144298375699402	-6.71428827193853	1.88986367144315e-11	4.18671e-10
HGD	1.46972934731069	-2.36796	0.444908415099339	-5.32234761937551	1.0243658292892e-07	8.88396e-07
HGF	29.1445850472885	-1.39396	0.203662250466516	-6.84446093340862	7.67643819498722e-12	1.89607e-10
HHEX	58.2830898911161	-0.637049	0.117674521431216	-5.41365160017811	6.175226470678e-08	5.60699e-07
HHLA3	178.06029239914	-0.63034	0.078280534129466	-8.05232642425732	8.12348996690469e-16	5.71303e-14
HIP1R	7555.94028278876	0.898045	0.11965413089626	7.50534178696336	6.12685292419478e-14	2.57035e-12
HIST1H2BJ	7.3797333367566	-0.890734	0.194077209408187	-4.58958606258793	4.44125857481913e-06	2.55333e-05
HIST1H2BK	131.090671608905	-0.880378	0.136768894784378	-6.43697753320864	1.21875964932809e-10	2.20907e-09
HIST1H3E	13.3720935362638	-1.08821	0.216645400621781	-5.02298548037289	5.08743920934579e-07	3.69891e-06
HIST1H4H	26.745753078907	-0.653528	0.123502403131802	-5.29162087742233	1.21237017258022e-07	1.03383e-06
HKDC1	160.911197319628	0.940946	0.185718431701611	5.06651697216797	4.05160642094851e-07	3.02541e-06
HLA-DMA	447.382790521933	-1.05727	0.148952484809509	-7.09806335868254	1.26517185642946e-12	3.80535e-11
HLA-DMB	428.022080483652	-0.980609	0.156416223794579	-6.26923117190748	3.62835122461679e-10	5.87708e-09
HLA-DOA	229.858950177899	-1.13826	0.187092234645974	-6.08392727570862	1.17273814442168e-09	1.6376e-08
HLA-DPA1	1594.81294020676	-1.16744	0.181878016752189	-6.41878510333922	1.37366153791626e-10	2.45306e-09
HLA-DPB1	932.656114402027	-1.16146	0.182832379664554	-6.35260895493683	2.11693381391724e-10	3.62635e-09
HLA-DQA1	254.169658243887	-1.37276	0.25037087918526	-5.48289833161334	4.1841350265164e-08	3.9701e-07
HLA-DQA2	54.3135790206449	-1.47703	0.283446046712316	-5.21096803805281	1.87857817565058e-07	1.52563e-06
HLA-DQB1	404.722422992464	-1.47178	0.228844894472092	-6.43133916696473	1.26484571324448e-10	2.28191e-09
HLA-DQB2	9.84596996508629	-1.71499	0.320113515736962	-5.35744608241164	8.44065444912411e-08	7.42685e-07
HLA-DRA	3142.08000413541	-1.28729	0.184957760904092	-6.95993966099189	3.40418508936941e-12	9.14402e-11
HLA-DRB1	1121.23465210467	-1.34978	0.19675168405455	-6.86031908204507	6.87069077743471e-12	1.71236e-10
HLA-DRB5	465.402053663887	-1.4715	0.231509534806788	-6.35612102711971	2.06912027576082e-10	3.55074e-09
HLA-DRB6	85.0658061762108	-1.32962	0.22286204875369	-5.96609287098586	2.43002007731629e-09	3.13311e-08
HLA-G	35.4882953766421	-1.04779	0.193937909777861	-5.40268949349517	6.5649045545404e-08	5.93296e-07
HMBOX1	139.426045831933	0.669873	0.126274219518591	5.30490983897183	1.12728699688612e-07	9.67676e-07
HMGCL	436.971316352896	-0.650533	0.0727364413656193	-8.94370688421174	3.76329851916417e-19	5.93195e-17
HMOX1	703.043279453625	-0.958094	0.164883265309915	-5.81074016270926	6.21972357799943e-09	7.16009e-08
HN1L	567.656257856538	-0.635127	0.0968533237920351	-6.5576163600623	5.46746457113086e-11	1.08675e-09
HOPX	1266.39914533066	-1.05001	0.174710864095226	-6.01001168900203	1.85509951039397e-09	2.47432e-08
HORMAD2	1.0225687154325	-2.6357	0.44222175985022	-5.96014206112666	2.52018746800869e-09	3.23857e-08
HOXA1	3.48716365505124	-2.6497	0.461542546999057	-5.74096335350866	9.4139463574073e-09	1.038e-07
HOXA10	16.2191378839013	-4.91681	0.647486537839709	-7.59368131207843	3.10942588922423e-14	1.40178e-12
HOXA11	6.13949235586789	-4.67908	0.83834531678519	-5.58132430196302	2.38694101018595e-08	2.3981e-07
HOXA11AS	3.13305522601697	-3.91349	0.877034220530777	-4.46218121271058	8.11295710435492e-06	4.31057e-05
HOXA3	8.56032761824698	-4.34208	0.971278037664302	-4.47048594274172	7.80420735455567e-06	4.16713e-05
HOXA4	3.82255729726702	-4.62941	0.745544440875003	-6.20943275111431	5.31761993398018e-10	8.16212e-09
HOXA5	5.7084412930222	-5.22258	0.904174158031666	-5.77607270701035	7.64643422774352e-09	8.5928e-08
HOXA7	27.0949336848246	-7.69591	0.73743318781394	-10.4360738541267	1.69684190779984e-25	1.02553e-22
HOXA9	1.9189936728282	-4.26333	0.983265397567712	-4.33588545844042	1.45174530384714e-05	7.24561e-05
HOXB13	5.24727219896883	-3.74374	0.75204488397363	-4.97807791591525	6.42188058207941e-07	4.55944e-06
HOXB2	15.7702679862984	-3.47155	0.329759891973769	-10.5275195598404	6.45120130732114e-26	4.99065e-23
HOXB3	16.7324138948787	-4.28465	0.394989811070789	-10.8474966917041	2.04962024484076e-27	2.64264e-24
HOXB4	3.45956618778142	-3.34562	0.488873419183921	-6.84352354623426	7.72686171214398e-12	1.90609e-10
HOXB7	10.5755012643747	-2.20263	0.2772671244737	-7.94407683339975	1.95642305393512e-15	1.21663e-13
HOXC10	10.1302354580759	-5.16471	1.04949071644289	-4.92116022071375	8.60326617036518e-07	5.89816e-06
HOXC4	32.5307041178282	-2.08291	0.311048443652306	-6.69642282225306	2.1358316584273e-11	4.68333e-10
HOXC5	2.28684795538133	-3.12841	0.707248075729099	-4.42335754233014	9.71787183669617e-06	5.07681e-05
HOXD13	3.96581233744909	-4.46303	0.906816039349054	-4.92164918302808	8.58179475461599e-07	5.88762e-06
HOXD9	18.657173930179	-3.1329	0.541855590033358	-5.78179892941465	7.39060114890143e-09	8.32465e-08
HPD	3.67013380231248	-3.55078	0.500581141422817	-7.09332154475608	1.30930760409766e-12	3.93199e-11
HPGDS	66.7726890408624	-0.767078	0.167907202446315	-4.5684656147242	4.91307649145988e-06	2.78403e-05
HPN	44.3303412206513	-1.06	0.241114594109409	-4.39624766802781	1.10138260104023e-05	5.67313e-05
HPRT1	419.661839386505	-0.789639	0.152820945934732	-5.16708666731788	2.37771026654754e-07	1.88e-06
HPS1	419.219441058812	-0.850431	0.12761490215057	-6.66404057581108	2.66399863578759e-11	5.71828e-10
HRASLS5	50.6743712411478	-1.31753	0.223753156126322	-5.88830341574069	3.90180296742816e-09	4.75494e-08
HS2ST1	981.105291241326	-0.617519	0.076244327830181	-8.09920930623366	5.53175394414335e-16	4.06784e-14
HS3ST1	169.809864266549	-1.66675	0.18901735018757	-8.81799448569401	1.16527991142397e-18	1.63308e-16
HSBP1L1	33.7848864017244	-0.996809	0.147625017497433	-6.75230729799649	1.45512263301264e-11	3.31483e-10
HSD17B3	9.51583315124387	-1.16674	0.270504161276332	-4.31322090862452	1.60893209562627e-05	7.92581e-05
HSD3B7	135.480657518868	-0.621608	0.10392306471361	-5.98142086362801	2.21199519420635e-09	2.88469e-08
HSF2BP	109.733568888711	0.908347	0.123726363039425	7.341580456242	2.11086199033026e-13	7.7465e-12
HSF4	258.608684567717	0.725106	0.162607395482522	4.45924435468128	8.22491098873796e-06	4.36166e-05
HSH2D	4.30332388264303	-1.3128	0.225269292185173	-5.82768350062962	5.62020372807897e-09	6.5756e-08
HSPA1B	1015.82981208569	-0.785636	0.1687558650809	-4.65545706055336	3.23262775787035e-06	1.92663e-05
HSPA2	2430.43073510945	-0.981177	0.185460365260009	-5.29049204845945	1.21987725775015e-07	1.03977e-06
HSPA7	26.6544589091565	-1.65822	0.2440927337236	-6.79340899704156	1.09514330123468e-11	2.59878e-10
HSPB1	2409.86532549259	-0.717573	0.16499445464953	-4.34907551172636	1.36712635863228e-05	6.87116e-05
HSPB11	173.017849497116	-0.680448	0.0730606962387589	-9.3134612293067	1.23732999671869e-20	3.05779e-18
HSPB6	453.233108624692	-1.75064	0.19752340587446	-8.86292894507036	7.79392572886151e-19	1.13334e-16
HSPB7	30.2137842685862	-1.20165	0.161069604406375	-7.46046817449242	8.62155791752602e-14	3.4883e-12
HTATIP2	144.680704200277	-0.987697	0.130454227539869	-7.57121773870619	3.69741714445805e-14	1.64386e-12
HTR1D	10.4823186462192	-1.21028	0.222496958621142	-5.43952503726466	5.34228015368176e-08	4.92407e-07
HTR7P1	64.2499210298476	-0.702129	0.13365727775949	-5.25320652297704	1.49473768102477e-07	1.24982e-06
HVCN1	299.396704511092	-0.727172	0.166494555106717	-4.36753948820386	1.2565408346154e-05	6.36999e-05
ICAM1	246.198150858155	-0.891341	0.168341888555138	-5.2948280618519	1.19128443933251e-07	1.01809e-06
ICAM4	2.35643883165074	-1.27603	0.285052003165472	-4.47649151753732	7.58796814698387e-06	4.06368e-05
ICOSLG	250.240100093528	-0.913335	0.151618609174259	-6.02390046920967	1.70263093389468e-09	2.2969e-08
ID3	2610.0389492703	-0.785878	0.159863754921729	-4.91592350318132	8.83649000386695e-07	6.04306e-06
IER3	178.161825166867	-1.07008	0.167947910462101	-6.37148751691839	1.87203531730818e-10	3.24129e-09
IFI30	483.883495884417	-1.26882	0.201200207421206	-6.30625602738341	2.85866015830679e-10	4.75378e-09
IFI44	245.645747180059	-0.767445	0.138460866581074	-5.54268622475016	2.9786634468717e-08	2.92869e-07
IFI44L	826.914208769649	-1.14531	0.200069786202885	-5.72453701682103	1.0371619272706e-08	1.13518e-07
IFI6	1736.45062453345	-1.22386	0.18344105315434	-6.67169589388835	2.52864133266677e-11	5.45803e-10
IFITM1	632.180818841629	-1.01274	0.156354059297014	-6.47722611750986	9.34241384013317e-11	1.7525e-09
IFITM2	530.114539797859	-0.690001	0.127204228340069	-5.42435752340746	5.81633616260415e-08	5.31858e-07
IFITM3	2094.67765210064	-0.964135	0.147671130683203	-6.52893229322897	6.6240184229113e-11	1.28752e-09
IGF1	75.5612761706424	-0.796051	0.139088644254607	-5.72333413168772	1.0445354459578e-08	1.14261e-07
IGF2	793.37291151331	-1.60527	0.204950176249178	-7.83249210592696	4.782932362733e-15	2.65048e-13
IGF2AS	3.02772677160208	-3.08895	0.466405154146999	-6.62288387818204	3.52257744913774e-11	7.33333e-10
IGF2BP2	21.7897987566256	-1.71669	0.239665017927488	-7.16287946862307	7.89998063959872e-13	2.53797e-11
IGF2BP3	23.1555915086765	-1.61847	0.192291892786256	-8.41673487172238	3.87122442503912e-17	3.63444e-15
IGFBP2	951.71535409566	-2.31307	0.255839703311017	-9.04107646132806	1.55136468573988e-19	2.7526e-17
IGFBP6	115.829583790244	-0.939922	0.193081101086991	-4.86801809967953	1.12723008335622e-06	7.5071e-06
IGJ	10.7553469563327	-2.38779	0.311918092876588	-7.65517078677471	1.9305550243778e-14	9.17369e-13
IGSF1	474.478552995345	-1.06161	0.231584763360271	-4.58410152701863	4.55942674008314e-06	2.61195e-05
IGSF10	21.1500726933185	-0.935703	0.191224563143535	-4.89321775698877	9.92005410375252e-07	6.69881e-06
IGSF3	740.416707282445	-0.811688	0.174050180386246	-4.66352698654816	3.10835401251148e-06	1.85771e-05
IGSF9B	297.264608495919	1.1384	0.173126660311262	6.57555665459461	4.84714824761104e-11	9.76498e-10
IKZF1	151.247595424765	-0.80607	0.143978311429917	-5.59855183707957	2.16149773540131e-08	2.19555e-07
IL10	4.00275398594891	-1.38893	0.27418651197138	-5.0656333115505	4.07044796501053e-07	3.0383e-06
IL10RA	236.077056620396	-0.787855	0.139831517432914	-5.63431409248742	1.7575644088438e-08	1.82259e-07
IL12RB1	20.9597393049612	-1.11025	0.158160729076833	-7.01973903014697	2.22283032865148e-12	6.22135e-11
IL13RA1	840.331094622197	-0.830997	0.118984366957088	-6.98408677298396	2.86714821182627e-12	7.88115e-11
IL15	7.34712747636947	-0.934339	0.206103427105587	-4.53335212832333	5.80549129246032e-06	3.21899e-05
IL15RA	31.4169594736016	-0.599932	0.126690800612916	-4.7354042778272	2.18618870210856e-06	1.36566e-05
IL18	117.301633418942	-0.924391	0.161822149431714	-5.71238875354832	1.11401240225931e-08	1.20903e-07
IL1R1	160.008290102159	-0.769371	0.166089350003359	-4.6322691413866	3.61679541023176e-06	2.1274e-05
IL20RA	45.8274569898238	-1.29068	0.252417685288616	-5.11328699359674	3.1660072379385e-07	2.42497e-06
IL28RA	48.0127869701956	-0.902122	0.191177789613566	-4.7187616086976	2.37284683581238e-06	1.46851e-05
IL2RB	16.4306673533676	-1.38132	0.224486909805209	-6.15322877373458	7.59211640719457e-10	1.11489e-08
IL2RG	30.5395017518429	-1.21744	0.179763413901703	-6.77248378177532	1.26589999658286e-11	2.93204e-10
ILDR2	172.239056418116	0.866064	0.170701082898856	5.07357101496105	3.90418675798342e-07	2.9289e-06
IMPA2	53.0778940653224	-1.02395	0.126535718646999	-8.09216993938404	5.86110571199279e-16	4.2937e-14
INHBC	11.3271240435281	0.728812	0.150398961889905	4.8458574327782	1.26066023268015e-06	8.30139e-06
INMT	18.3051716468835	-1.4118	0.213203933217054	-6.62184072640928	3.54753189664128e-11	7.37734e-10
INPP5D	543.156095601853	-0.749625	0.113575328589844	-6.60024238090195	4.10486109775947e-11	8.37655e-10
INSM2	73.3441268628563	1.01707	0.228955311234186	4.4422304075382	8.90311481128602e-06	4.68789e-05
IQCH	22.0888081537795	-0.990437	0.129111802137021	-7.67115668470626	1.70452174589433e-14	8.28278e-13
IQGAP1	1073.08139256643	-0.924544	0.116721105885495	-7.92096868641877	2.35667290928786e-15	1.42878e-13
IQGAP2	225.863795331239	-1.01701	0.227979999365987	-4.46095545178006	8.15950520573237e-06	4.33411e-05
IQUB	14.3911872302793	-1.10123	0.184853640145659	-5.95730634578646	2.56429291146692e-09	3.28869e-08
IRAK2	84.6543187727845	-0.820824	0.137896389393229	-5.95247007585803	2.64125438970997e-09	3.37843e-08
IRF5	173.076121075209	-0.826227	0.125045104634698	-6.60742905205052	3.91051484760523e-11	8.03713e-10
IRF6	12.6506202417778	-1.26912	0.210785965867793	-6.02090290837259	1.73446781948552e-09	2.33435e-08
IRF7	182.606583791468	-0.724595	0.145111931631075	-4.99335480192968	5.93394009616574e-07	4.25046e-06
IRX5	12.2132399595459	-3.50087	0.409104399104234	-8.55739823555869	1.15443205210122e-17	1.2614e-15
ISG15	501.017083237246	-0.944724	0.184396881946781	-5.12331986792432	3.00202434617494e-07	2.31404e-06
ISG20	43.4836055576927	-0.894967	0.160440612954465	-5.57818052773359	2.43047349152723e-08	2.43173e-07
ISLR	267.210899577392	-1.07359	0.173632093399017	-6.18314846137463	6.28355682887666e-10	9.42777e-09
ISYNA1	322.116815830718	-0.650169	0.114418064212189	-5.68239988122052	1.32817667121803e-08	1.4176e-07
ITGA11	67.7452524756104	-0.824298	0.158481527959328	-5.20122181241397	1.97982643563529e-07	1.59807e-06
ITGA2	170.976422471458	-1.03078	0.163533071809938	-6.30319980610288	2.91562628845149e-10	4.82776e-09
ITGA2B	28.2092747124145	0.723848	0.152992704460535	4.73126074428894	2.2312969505783e-06	1.3898e-05
ITGAL	98.5872574993794	-0.896138	0.172436045923229	-5.19693072010377	2.02605826816256e-07	1.6284e-06
ITGAM	210.179433320568	-0.91754	0.156154677029107	-5.87584064813988	4.20702876635756e-09	5.09799e-08
ITGB2	975.349176940875	-0.977669	0.146372151208521	-6.6793388066776	2.4002268042905e-11	5.21577e-10
ITGB3	34.0764402432284	-1.01483	0.214893037451003	-4.72249690167768	2.32966639845346e-06	1.44409e-05
ITGB4	1091.39656142169	-1.40403	0.19141743114326	-7.33490528962814	2.21878336046277e-13	8.12713e-12
ITGB5	975.635583531092	-0.763645	0.118256053408728	-6.45755521727384	1.06407932911474e-10	1.95807e-09
ITGB7	23.3490618962906	-1.20086	0.175659040745329	-6.83631067844749	8.1258621766069e-12	1.99434e-10
ITK	9.24810447289987	-1.83139	0.29506406790988	-6.20675591833649	5.40895067617895e-10	8.26949e-09
ITPKB	4262.22759695238	-0.585498	0.128600177685052	-4.55285249781633	5.29233808035118e-06	2.96592e-05
ITPKC	368.61232570449	-0.772663	0.105376729389742	-7.33239109426658	2.26082176831855e-13	8.23433e-12
JAK3	78.385646356533	-1.28736	0.168734334426161	-7.62952441611568	2.3562130532357e-14	1.10337e-12
JPH1	88.0483825575717	-0.968193	0.225422253577866	-4.29501959260527	1.74677909174059e-05	8.51878e-05
JUB	92.1665681207545	-0.892695	0.15237484610393	-5.85854696019861	4.66934583809200e-09	5.59511e-08
JUN	3414.56251530999	-0.618622	0.14019797579286	-4.41249028773529	1.02188380036439e-05	5.3013e-05
JUP	476.217300644862	-0.657968	0.134970967485096	-4.87488720505813	1.08870643488227e-06	7.27057e-06
KANK1	2999.64042135801	0.603095	0.0849449380379811	7.09983210555553	1.24908539416937e-12	3.77458e-11
KANK2	727.366998962347	-0.84737	0.109777645460372	-7.71896367261308	1.17279319987654e-14	5.92215e-13
KBTBD12	35.5978405600938	-1.01211	0.209748195434488	-4.82537842832324	1.39737682395841e-06	9.12091e-06
KCNE1	2.92808777061745	-1.2379	0.262900609002094	-4.70861036344466	2.49411312988961e-06	1.53228e-05
KCNE1L	77.1902404404517	-1.77986	0.260747661035096	-6.82598654650046	8.73231135925585e-12	2.12967e-10
KCNE3	59.9256944029724	-0.895601	0.151147454191105	-5.92534516485221	3.11642100809353e-09	3.89855e-08
KCNG1	166.019594655768	-1.86067	0.26368342809508	-7.05645525926674	1.70803600214712e-12	4.95254e-11
KCNH7	57.9360490971405	1.23915	0.248579071516278	4.98491563816977	6.19888537127153e-07	4.42385e-06
KCNIP1	1133.02856284302	0.60716	0.133068443803706	4.56276326249974	5.04847295640375e-06	2.84907e-05
KCNIP2	1907.043016103	1.13683	0.175998570530838	6.45928999385257	1.05195357004879e-10	1.93945e-09
KCNIP3	2464.14806573856	0.813695	0.127271988716059	6.39335282499508	1.62287198497754e-10	2.8559e-09
KCNJ1	4.28848517331487	-1.24207	0.277111795936572	-4.48219080664474	7.38806403067543e-06	3.97566e-05
KCNJ11	1016.73174414694	1.12342	0.165522652976385	6.78712746877002	1.1438813882168e-11	2.69553e-10
KCNK10	348.415656394705	0.664553	0.153920475216587	4.31750596053469	1.57802148611892e-05	7.79141e-05
KCNK13	33.6841036797093	-1.04946	0.146632666434161	-7.15706096338055	8.24250487346953e-13	2.63053e-11
KCNK3	735.535070773402	1.06515	0.174450277879653	6.10577129200999	1.02305418029171e-09	1.44845e-08
KCNK5	4.52277638821276	-1.76106	0.347188396362368	-5.07234230805729	3.9294872420372e-07	2.94559e-06
KCNQ1	105.524193279336	-0.772456	0.139074870870752	-5.55424260491689	2.7881802230509e-08	2.76137e-07
KCNT2	259.146994099248	0.585127	0.1242414449943	4.70959494137956	2.48209574979669e-06	1.52587e-05
KDELC2	319.146779922576	-0.633238	0.136110838134232	-4.65236883505713	3.28143463387972e-06	1.95271e-05
KDELR1	1335.94865960394	-0.633875	0.0711473472498527	-8.90932748161817	5.13430476894385e-19	7.63827e-17
KDELR3	23.3774757811778	-1.2327	0.168521503726912	-7.31477741496291	2.5780837320169e-13	9.25049e-12
KHNYN	368.823389322193	-0.679307	0.108607937802221	-6.25467380623488	3.98347612795544e-10	6.3934e-09
KIAA0040	217.703998778777	-1.07345	0.176068476258184	-6.096750018696	1.08246593025056e-09	1.52587e-08
KIAA0495	250.644717145788	-1.18886	0.156423264340593	-7.60028554807421	2.95478034950853e-14	1.3383e-12
KIAA0664P3	34.7969629060891	0.612433	0.115209799681369	5.31580594056867	1.06186271558359e-07	9.16396e-07
KIAA0895L	1476.09769054211	0.602343	0.0978436979128003	6.15617822716388	7.45213561269691e-10	1.096e-08
KIAA1244	990.107879182016	0.721931	0.159641426953792	4.52220106757437	6.11998825095729e-06	3.36634e-05
KIAA1257	7.64402949721341	-1.47331	0.239995504978249	-6.13890904931112	8.30901194391458e-10	1.20552e-08
KIAA1383	93.1728401048076	-0.744792	0.155122405949229	-4.8013167302792	1.57625727916738e-06	1.01684e-05
KIAA1409	1308.45869402714	0.970664	0.145422923413008	6.67476285534737	2.47632263018552e-11	5.36255e-10
KIAA1522	371.879561525411	-0.971783	0.165228739089224	-5.88143779849681	4.06717793933136e-09	4.9378e-08
KIAA1598	1690.4500484545	-0.650972	0.152148496849716	-4.27852848960901	1.88132913337083e-05	9.10761e-05
KIAA1755	1399.60981030173	0.640769	0.123612331847587	5.18369999031611	2.17526739863306e-07	1.73842e-06
KIAA1804	29.6953621118809	-1.16979	0.250046310497781	-4.67830897516524	2.89250464530236e-06	1.74707e-05
KIAA1875	47.8823000980227	0.791943	0.162991909404227	4.85878498631866	1.18108311416834e-06	7.82533e-06
KIAA2013	792.880088434731	-0.606077	0.0679578871236544	-8.91841346386983	4.73015533872057e-19	7.14697e-17
KIF13A	1795.40043087106	0.645736	0.0970973571609086	6.65039466408018	2.92308138201101e-11	6.20553e-10
KIF16B	165.881655575582	-0.812609	0.126414615885203	-6.42812829456224	1.29184692268748e-10	2.32196e-09
KIF17	122.137363791353	-0.821293	0.184827937701653	-4.44355655387929	8.84838839153082e-06	4.6654e-05
KIF18A	27.9653588019637	-1.22867	0.235572855325676	-5.21567083152278	1.83153172877935e-07	1.49459e-06
KIF21B	3943.38711559523	0.605162	0.112871785807788	5.36149554350936	8.25357592454762e-08	7.2921e-07
KIF23	75.1207688899043	-1.40572	0.235198485873265	-5.97675181715232	2.27630577590176e-09	2.95031e-08
KIF26B	317.090380404793	0.950382	0.183659727760297	5.17469102800593	2.2828843805035e-07	1.81393e-06
KIF2C	96.6365407101344	-1.4621	0.224206236666141	-6.52121602705496	6.97396552526035e-11	1.34742e-09
KISS1R	2.92735554773466	-2.1303	0.445840506006972	-4.77817250634823	1.76895588639895e-06	1.13059e-05
KL	20.671867632898	-0.810694	0.155442475172725	-5.21539624086526	1.83424711864145e-07	1.49555e-06
KLF5	35.5074418861744	-0.915445	0.180486362971677	-5.07210185418853	3.93445693925391e-07	2.94818e-06
KLHDC7A	1.86610069231064	-3.13821	0.640271761949596	-4.9013646546793	9.51732083288006e-07	6.46924e-06
KLHDC7B	6.77684674060415	-1.58107	0.23429977756863	-6.74807220021504	1.4982239506103e-11	3.39691e-10
KLHL26	227.156099555512	-1.18029	0.183528727312509	-6.43111801400573	1.26668763300037e-10	2.28277e-09
KLHL4	212.675407316128	-0.865393	0.189240468250214	-4.5729803216969	4.80835313671715e-06	2.73269e-05
KLRB1	2.59473692383721	-2.01151	0.384371296283107	-5.23324056030717	1.66563735385812e-07	1.37078e-06
KMO	9.98777430625879	-1.31715	0.240927929790838	-5.46699426340544	4.57730860860468e-08	4.30779e-07
KNCN	9.27800991999645	-1.7863	0.415901633038904	-4.29500148834712	1.74692164611598e-05	8.51878e-05
KRT18	16.8740924480275	-1.34726	0.265090201963335	-5.0822516717386	3.72986766249108e-07	2.8093e-06
KRT7	4.9682533469333	-3.01304	0.379979459429944	-7.92947580204757	2.20072835022792e-15	1.34265e-13
KRT8	9.28631388221292	-1.8609	0.376277977120648	-4.94555144211732	7.59286154918933e-07	5.27085e-06
KRT80	1.52171652615224	-2.21394	0.470454679170894	-4.70594913669302	2.52687519608067e-06	1.55044e-05
KRT86	2.48924693036579	-1.17871	0.243160172971087	-4.8474831938942	1.25037621298774e-06	8.23647e-06
KYNU	15.2624894168407	-1.52418	0.21667956879457	-7.03427487009355	2.0029992074789e-12	5.68006e-11
LAG3	21.7772068321443	-0.870978	0.195266389897396	-4.46046271546992	8.1782886435841e-06	4.3417e-05
LAIR1	274.281560806535	-1.08918	0.153396961378245	-7.10040807088769	1.24389053245423e-12	3.76476e-11
LAMA2	361.097262979836	-0.710854	0.156186143425232	-4.55132806960834	5.33083497322867e-06	2.98403e-05
LAMA4	720.798660807187	-0.619391	0.142756941893451	-4.33878128787199	1.43275019501648e-05	7.16375e-05
LAMB1	650.581592575938	-1.168	0.197163895882106	-5.92399255586742	3.14217685949554e-09	3.92823e-08
LAMP3	8.56484726329666	-1.30397	0.227840959615806	-5.72315045995191	1.04566580247894e-08	1.1432e-07
LAPTM5	2694.98258934041	-0.922541	0.135476652957622	-6.80959059800799	9.78768791822543e-12	2.34565e-10
LASS2	2110.34620168521	-0.58295	0.0808164067860742	-7.21326463929843	5.46261032602403e-13	1.81524e-11
LAT2	234.230362473245	-0.922789	0.136525034417026	-6.75912133514757	1.38831095821825e-11	3.18505e-10
LATS2	122.062710989291	-0.931101	0.136744232870325	-6.80906864183469	9.82326044741792e-12	2.35126e-10
LAX1	2.81770309169102	-1.3458	0.258923641175855	-5.19766735551127	2.01804832203885e-07	1.62418e-06
LBXCOR1	28.8398302772795	0.597735	0.117233383261548	5.09867887541795	3.4203222634738e-07	2.59714e-06
LCA5L	29.588577063411	-0.619346	0.122449195332504	-5.05798117326864	4.23718254605533e-07	3.151e-06
LCAT	900.574674437138	0.655378	0.139104459828796	4.71140862775624	2.46010394170517e-06	1.51427e-05
LCK	7.64685743175167	-1.42895	0.237636692456691	-6.01315538405938	1.81946482317459e-09	2.43014e-08
LCP1	521.911936629741	-0.868615	0.136081252128005	-6.38306515446132	1.73578008536287e-10	3.03252e-09
LCP2	208.717787889609	-0.714262	0.129750794830397	-5.50487471307601	3.69430898480994e-08	3.56684e-07
LCTL	13.0636371693309	-1.08789	0.218476277183747	-4.97946040273785	6.37617963851645e-07	4.53699e-06
LDHA	2466.0302680534	-1.06405	0.122314875930304	-8.69929134221132	3.33963111299943e-18	4.06445e-16
LDLRAD2	17.148715957603	-1.14764	0.184520685155155	-6.21958419285574	4.98474093081811e-10	7.76832e-09
LDLRAP1	341.71922976906	-0.921867	0.164506296769751	-5.60384185511937	2.09652008255462e-08	2.13629e-07
LECT1	11.7334609101467	-2.07324	0.307553391828434	-6.74108245638109	1.57210951537751e-11	3.52722e-10
LEFTY2	28.6941409579995	-3.71812	0.297192767115034	-12.5108158749425	6.51515861634304e-36	4.20011e-32
LEKR1	8.63527655424411	-0.737291	0.165956073282316	-4.44269056896565	8.88408867069894e-06	4.68042e-05
LENG9	33.0224305461751	-0.75635	0.126182413349055	-5.99410191019747	2.04613034906673e-09	2.69372e-08
LEPREL1	89.2954901748802	-1.36642	0.149338368209663	-9.14981614770503	5.70305242393247e-20	1.13708e-17
LGALS1	1599.15406611664	-0.850997	0.130469409645577	-6.52258200694739	6.91072555472055e-11	1.33787e-09
LGALS12	0.840425461577239	-1.38675	0.299792104480231	-4.62569212421184	3.73349540556251e-06	2.18739e-05
LGALS3	479.76825616237	-1.02425	0.145622943437771	-7.03356715594008	2.01319008909643e-12	5.7006e-11
LGALS8	250.319394783527	-0.593111	0.107607671632047	-5.51179513043755	3.55192219632013e-08	3.44295e-07
LGALS9	572.195424019892	-0.690805	0.137400280466388	-5.02768454463054	4.96437650536705e-07	3.62033e-06
LGALS9C	9.28257228962203	-1.23109	0.18811797990482	-6.5442583881241	5.97913431854898e-11	1.17636e-09
LGI4	527.349335485239	-1.26547	0.189990386730391	-6.66069103724644	2.72543048865969e-11	5.82429e-10
LGR6	42.9143027952064	-2.42862	0.335071261726165	-7.24806729592819	4.22760565940267e-13	1.43947e-11
LHFP	1121.7037080621	-0.63466	0.107245417251792	-5.91783025690733	3.26216373249061e-09	4.05986e-08
LHFPL2	693.712090716366	-0.643896	0.110501705008001	-5.82702329709363	5.64247381004045e-09	6.5897e-08
LHFPL3	4490.35364305761	0.716858	0.168369764499233	4.25764041333052	2.06595900318694e-05	9.88023e-05
LHX3	23.2194212907973	2.09391	0.313434928677393	6.68053282138086	2.38075052358812e-11	5.17927e-10
LHX5	87.7902796269991	1.42008	0.309126541962171	4.59385822171028	4.35125065073093e-06	2.5068e-05
LILRA2	63.7486728974184	-0.970713	0.161989326295013	-5.99245236929813	2.06699987514848e-09	2.71759e-08
LILRB1	94.7031989954329	-0.861758	0.162945850589855	-5.28861679310076	1.23244784962374e-07	1.0491e-06
LILRB2	32.443902207581	-1.04596	0.194165825185022	-5.38692181808716	7.16745925822378e-08	6.42437e-07
LILRB3	18.0985813234865	-1.00151	0.217659624257029	-4.60128472201851	4.19892990171546e-06	2.42917e-05
LILRB4	351.486540899356	-0.740976	0.161894506636547	-4.57690355982478	4.71908876171724e-06	2.69192e-05
LIMD1	702.337734070715	0.730896	0.145491257857876	5.02364492228001	5.06999346861745e-07	3.689e-06
LIMS2	1079.26313313073	0.706343	0.160239004595525	4.40806192493534	1.04299727543895e-05	5.40069e-05
LIMS3-LOC440895	5.79064238268624	-1.0386	0.201649578795726	-5.15050022380236	2.59792622132823e-07	2.03747e-06
LINGO2	25.5137217352233	-1.685	0.334786317896874	-5.03304815900884	4.82741790583805e-07	3.53511e-06
LIPC	7.81697283952357	-1.25003	0.206732163740353	-6.04661976991012	1.47916283333357e-09	2.0217e-08
LLGL2	72.7198506301765	-0.748876	0.153344762183434	-4.88360682477304	1.04162676048012e-06	6.99481e-06
LMCD1	231.090917855944	-0.667847	0.117062866914867	-5.70502865729809	1.16323516430343e-08	1.25541e-07
LMO4	2232.34664109471	-0.59024	0.107559657357509	-5.48755479830272	4.07535612723237e-08	3.88838e-07
LOC100128239	223.758335676397	0.730909	0.123488288309357	5.91885175068159	3.24197020997091e-09	4.03993e-08
LOC100129534	34.81289139871	-0.72464	0.112153789806605	-6.46113009277892	1.03923926480404e-10	1.9215e-09
LOC100129726	13.7873637764161	0.719593	0.147246477843304	4.88699708845189	1.02385607436529e-06	6.88983e-06
LOC100130776	36.5348809294521	-0.974654	0.137999107578011	-7.06275220885833	1.63236664139676e-12	4.76168e-11
LOC100130872	8.89073857787275	-0.9176	0.198727563606375	-4.61737569679542	3.88623321630856e-06	2.26521e-05
LOC100132215	29.8444980086824	-0.793447	0.13194312761031	-6.0135521099	1.81501549435791e-09	2.42755e-08
LOC100133545	29.4860047165036	0.930208	0.143249336888061	6.49362742269393	8.3793828712362e-11	1.59036e-09
LOC100233209	12.4304255203476	-1.19729	0.215519315076333	-5.55538444660093	2.77001413010683e-08	2.74588e-07
LOC100240735	1.69661173386053	-1.13446	0.233886732197599	-4.85045598169804	1.23177968993877e-06	8.13059e-06
LOC100270710	35.4050052746838	-1.66114	0.174987063131419	-9.49293149427726	2.24626610126855e-21	6.38865e-19
LOC145837	59.7151805853958	0.772346	0.167368593966568	4.61464378281915	3.93770094660899e-06	2.29245e-05
LOC149134	20.8801659862409	-0.708111	0.142467879799558	-4.97032281908541	6.68415187278568e-07	4.71278e-06
LOC151534	21.4393774299982	-0.760006	0.142228136372312	-5.34356983446567	9.11336955960235e-08	7.96802e-07
LOC202181	19.7609569558861	-1.05233	0.181195256950499	-5.8076913539836	6.33401416755098e-09	7.27434e-08
LOC254559	2485.24965776277	0.681464	0.137102482175223	4.97047440128889	6.67892796392829e-07	4.71081e-06
LOC283174	1815.31223009015	0.757025	0.126871772015205	5.96685327848585	2.41872717926729e-09	3.12063e-08
LOC283761	85.1021322272082	0.901162	0.173328291055972	5.19916243342009	2.00188529531312e-07	1.61386e-06
LOC285456	5.49975570392508	0.769426	0.126590635522906	6.0780637655405	1.21642386079145e-09	1.69249e-08
LOC285830	14.7135546794211	-0.935208	0.171195139227154	-5.46282081586816	4.6862756618933e-08	4.38722e-07
LOC286367	33.5626142084787	-0.826867	0.178447887457821	-4.63366210951254	3.59253192804209e-06	2.1157e-05
LOC348840	3.67153110418859	-1.3665	0.308641379978147	-4.42746603082889	9.53465822766836e-06	4.98784e-05
LOC387646	45.2758942787792	-0.671149	0.14993552995031	-4.4762498148738	7.59655923260205e-06	4.06523e-05
LOC400043	109.051469741151	-1.27209	0.186058475980347	-6.83706395738605	8.08326600334158e-12	1.98641e-10
LOC400759	5.98641609234277	-1.24854	0.230293877789568	-5.42149129916858	5.91038743622054e-08	5.39693e-07
LOC440896	9.10737203494748	-1.28483	0.28726578242481	-4.4726079492256	7.72713699078337e-06	4.13054e-05
LOC441454	2.73952650545275	0.874719	0.150851378628794	5.7985479547641	6.68915757281207e-09	7.64136e-08
LOC441869	126.066838783747	-1.05467	0.169990013046037	-6.2043099945517	5.49374021464583e-10	8.37265e-09
LOC541471	50.0956319007856	-1.11059	0.213266854903783	-5.20753459471314	1.91366168301009e-07	1.54907e-06
LOC606724	28.3255404164546	-0.587328	0.131864625901395	-4.45402265907687	8.42762003957848e-06	4.46426e-05
LOC643008	54.6247282935603	-1.05341	0.171272600447081	-6.15049123857957	7.72433257946452e-10	1.1314e-08
LOC644538	78.0864418088812	-0.810368	0.124908826553806	-6.48767560505027	8.71707124442604e-11	1.64798e-09
LOC645323	3424.08021761732	0.762978	0.107322609539152	7.10920023911784	1.16717306389142e-12	3.56043e-11
LOC646627	2.54476640887853	-1.99855	0.441406282970499	-4.52769205217822	5.9631397196234e-06	3.29036e-05
LOC647121	7.7346382067236	-1.02925	0.171403188730133	-6.00483694897491	1.91524276311762e-09	2.54401e-08
LOC647309	2.05377337578446	-2.61086	0.504867212064429	-5.17137002764886	2.32383880149646e-07	1.84196e-06
LOC647946	2.56077821099014	-3.44227	0.551513483145963	-6.24149026239292	4.33421424886568e-10	6.88208e-09
LOC729234	171.848055642229	-0.736312	0.173035628378546	-4.25526070364745	2.08805576274029e-05	9.97111e-05
LOH3CR2A	11.1670322446751	-0.814159	0.14967638786933	-5.43946221892906	5.34416403777199e-08	4.92407e-07
LOR	3.15407521516415	1.91155	0.297170511160337	6.43251821160939	1.25506988267537e-10	2.26851e-09
LOX	56.7966419402625	-1.46757	0.184041058073216	-7.97416584789078	1.53413416915144e-15	9.75992e-14
LOXL1	67.0889106442826	-1.90733	0.245096864911771	-7.78195118914987	7.1414423611818e-15	3.75678e-13
LOXL4	11.1263221192752	-1.87304	0.220737511078561	-8.48536168484186	2.15048786003352e-17	2.07952e-15
LPAL2	11.8193245493485	0.956989	0.169339719135626	5.65129815560046	1.59240601002434e-08	1.67013e-07
LPAR1	724.439072476556	-1.08764	0.203551490237329	-5.34333986792806	9.12494416038015e-08	7.97453e-07
LPAR5	199.148472584852	-0.844387	0.154832302119639	-5.45355531541834	4.93725779964599e-08	4.5907e-07
LPAR6	255.394070090296	-0.719172	0.119055476454301	-6.04064431801476	1.53500017892226e-09	2.09358e-08
LPCAT2	286.379919118888	-0.987836	0.157590006345597	-6.26839496792888	3.64788547467649e-10	5.89884e-09
LPIN3	30.8086642986529	-1.40719	0.188760756895127	-7.45487964422017	8.99499042477413e-14	3.60919e-12
LPPR1	2392.01031020793	0.671166	0.151203569298377	4.4388241975071	9.04516595182174e-06	4.75363e-05
LRAT	57.2437075343318	-1.74314	0.222842227515024	-7.82231510679111	5.18605938021665e-15	2.84939e-13
LRGUK	4.57806119657897	-2.08411	0.288779232891555	-7.21697315025373	5.31574673291466e-13	1.77559e-11
LRIG3	128.157541305852	-0.869327	0.164823283150205	-5.27429964071465	1.33264019771297e-07	1.12942e-06
LRIT2	38.6396939771655	0.713767	0.151899448020252	4.69894093805886	2.61514061894979e-06	1.59699e-05
LRMP	95.9132164185185	-0.701438	0.137258866155242	-5.11033096806399	3.21594929928268e-07	2.45642e-06
LRP4	8295.12881255018	0.798244	0.117683355779779	6.78297706954458	1.17724328306494e-11	2.76982e-10
LRRC10B	71.9137526820648	-1.07066	0.222919013411575	-4.80291856402729	1.56369493626061e-06	1.01008e-05
LRRC16B	466.973839173102	0.660242	0.105625908892934	6.25075350432099	4.08477128631319e-10	6.51811e-09
LRRC17	195.025664234052	-0.929136	0.188616510932681	-4.92605700334796	8.39055291895237e-07	5.77253e-06
LRRC25	74.2086993889041	-0.940522	0.156176559328359	-6.02217375641711	1.72090001943665e-09	2.3177e-08
LRRC33	115.21682360542	-0.958906	0.143844763091611	-6.6662535525997	2.62415752116817e-11	5.6453e-10
LRRC37A2	173.206430806386	0.585999	0.115032888061342	5.09418562201069	3.50243486565721e-07	2.65324e-06
LRRC37A4	423.703078298096	0.630505	0.110192316460249	5.72186144107502	1.05363222704684e-08	1.15061e-07
LRRC39	20.5509074158694	-0.76911	0.157032261259691	-4.89778506822466	9.69229650498647e-07	6.56564e-06
LRRC42	270.711331992705	-0.586912	0.0768244340687761	-7.63964691259124	2.17818240746738e-14	1.02248e-12
LRRC43	22.8427010912485	-0.953179	0.202273366700175	-4.71232995876555	2.44900413236529e-06	1.5084e-05
LRRC48	61.3071065501465	-0.972116	0.139774497169633	-6.95488957794569	3.52838292366582e-12	9.41227e-11
LRRC50	24.108248940872	-1.20105	0.208066860214302	-5.77242352947466	7.81394096506716e-09	8.76576e-08
LRRC61	52.894002771127	-1.32435	0.217177586214104	-6.09801625345692	1.07392829481088e-09	1.51604e-08
LRRC66	10.5638238065824	-1.10506	0.150120951784901	-7.36115067598739	1.82331614196007e-13	6.78133e-12
LRRC67	4.35299557185076	-1.18738	0.203539485160231	-5.83368301251925	5.42170782392847e-09	6.37421e-08
LRRIQ1	5.87780647743686	-2.20598	0.354596621915059	-6.22109420077005	4.93699622496189e-10	7.7188e-09
LRRN1	3723.22488261044	0.93355	0.120568215639915	7.74292268151025	9.71571290964558e-15	5.01072e-13
LRRN4	4.15685732992876	0.76066	0.163004264008153	4.66650510383995	3.06366038873394e-06	1.83383e-05
LRRTM3	970.593001234746	0.757708	0.121455524638031	6.23856433959127	4.41604987451454e-10	6.99387e-09
LRRTM4	546.637766590838	0.657165	0.136272639225573	4.82242519730508	1.41823222129384e-06	9.24145e-06
LSP1	131.015846145817	-1.2312	0.203123990000168	-6.06134619236993	1.34986933982239e-09	1.86076e-08
LST1	128.957100400824	-0.697598	0.131799986352719	-5.29285669606848	1.20420282705593e-07	1.02732e-06
LTB	10.0674435835965	-0.901113	0.179511267634774	-5.01981580472329	5.17210498820095e-07	3.75482e-06
LTBP1	594.887492572369	-1.01457	0.15255594230065	-6.65045916109051	2.92180066612144e-11	6.20553e-10
LTBP2	185.985052833007	-0.896401	0.118756943605181	-7.5482020075866	4.41308071695367e-14	1.91795e-12
LTBR	186.954699180579	-0.876463	0.104868011990118	-8.35777106317159	6.39143255908156e-17	5.7227e-15
LTF	68.3085419751694	-3.43085	0.323582712981951	-10.6027064114399	2.89479524410622e-26	2.54479e-23
LUM	80.0854381034023	-1.32607	0.210070601777492	-6.31250241277641	2.74559180235268e-10	4.5934e-09
LY86	189.487621815153	-0.841714	0.147610877006501	-5.70224770955971	1.18237835491647e-08	1.27252e-07
LY96	47.8064893931545	-0.78346	0.16685556513794	-4.69543687806927	2.66037513639437e-06	1.62104e-05
LYL1	88.5692880754411	-0.687972	0.132112443633175	-5.20747137959312	1.91431352627092e-07	1.54907e-06
LYN	371.12583837117	-0.730381	0.109705739256446	-6.65763734861587	2.78264330208022e-11	5.93999e-10
LYPD3	7.87121894382952	-1.19978	0.192740214238739	-6.22487528229968	4.81939227877634e-10	7.54713e-09
LYPD6	128.056416527808	-1.14025	0.165784115329489	-6.87790938486454	6.07372820651439e-12	1.5355e-10
LYPLA2	546.426062758643	-0.61687	0.0897081438095066	-6.87641072920815	6.13793681869558e-12	1.54971e-10
MACC1	4.66449647538989	-1.70153	0.292209195110222	-5.82297388006473	5.78095931080355e-09	6.7268e-08
MADCAM1	42.6558433285003	1.15551	0.232238870612373	4.97551215581083	6.5075350317457e-07	4.60841e-06
MAF	756.459447604107	-0.647592	0.0959847812995505	-6.74681665401148	1.51124041628534e-11	3.41841e-10
MAGI3	425.720613288944	-0.616326	0.120478984496449	-5.11562806587921	3.12698697021637e-07	2.40079e-06
MAGOH	225.075543882315	-0.60832	0.0670130849134533	-9.07763704725803	1.10957466500083e-19	2.06338e-17
MALL	31.1871540061443	-1.0678	0.146904312006823	-7.26868263116255	3.63010131086259e-13	1.24922e-11
MAMDC2	30.0001644251908	-1.13662	0.208276759736735	-5.45726758534477	4.83517416862288e-08	4.51096e-07
MAMDC4	167.854427819848	0.664265	0.13222593428021	5.02370918872017	5.06829636844507e-07	3.689e-06
MAML3	115.695722347016	-0.824117	0.128793873880999	-6.3987314045786	1.56673164442666e-10	2.77224e-09
MAN1A1	220.998903000129	-0.731236	0.159976395148685	-4.57089962266586	4.85634872763267e-06	2.75754e-05
MAN1C1	480.06678806943	-1.3006	0.130289411354115	-9.98237001860657	1.82065154017741e-23	7.53705e-21
MAOB	1619.70699510952	-1.0971	0.238117305883038	-4.60741385289035	4.07708028919576e-06	2.36789e-05
MAP1LC3C	3.16886227533193	-2.12198	0.346545496294033	-6.12323767725136	9.16927591886165e-10	1.31261e-08
MAP2K3	307.754775463008	-0.593453	0.110390031668831	-5.3759659404049	7.61731915635189e-08	6.78576e-07
MAP3K8	78.4417779173465	-0.580452	0.126498147880925	-4.58862043744839	4.46184858654679e-06	2.5644e-05
MAP4K1	39.0179897689137	-0.701098	0.140474835272006	-4.99091710271612	6.00932855422644e-07	4.29492e-06
MAPK13	41.237775798165	-0.874962	0.191389081401167	-4.57163840550131	4.83925488712674e-06	2.74864e-05
MAPK15	10.5885420688247	-2.51251	0.412031301070338	-6.09786740678411	1.07492848352021e-09	1.51635e-08
MARCH4	508.107275750277	1.0149	0.196656925004457	5.16075442216492	2.45956649037169e-07	1.93918e-06
MARVELD1	150.059878884708	-1.46694	0.163229817526237	-8.98697604982119	2.54125982222135e-19	4.31122e-17
MATN2	1700.8851005773	-0.683512	0.152542872058279	-4.48078949632433	7.43674321537716e-06	3.99518e-05
MBOAT1	33.4241028153049	-1.02138	0.164393736372664	-6.21302508536997	5.19741481023558e-10	8.02859e-09
MBOAT7	908.444356413207	-0.642172	0.0904619812351957	-7.09880856518741	1.25836969484353e-12	3.79079e-11
MCAM	1191.31957705856	-0.694771	0.128976333866134	-5.38681030660029	7.17190567586208e-08	6.42449e-07
MCM3APAS	69.7894590443229	0.877001	0.11235253989769	7.80579315156474	5.91284910768269e-15	3.17651e-13
MCOLN3	2.94303279701158	-1.73148	0.342242250296197	-5.05922804227577	4.20957190574085e-07	3.13557e-06
MDFIC	296.44635630858	-0.763157	0.161453221183946	-4.7268012961158	2.28084261425427e-06	1.41746e-05
MDGA2	290.746235935714	0.704448	0.134323996069816	5.24439194313917	1.56798566346521e-07	1.30094e-06
MEGF10	612.371570643752	-0.853674	0.191982045957032	-4.44663540152992	8.72256957895859e-06	4.60411e-05
MEGF11	1820.74870228012	1.19834	0.154638248865445	7.74929381166694	9.24049891421946e-15	4.80407e-13
MEIS3P1	144.317069209694	-0.583314	0.0975660866128932	-5.97865348273745	2.2498957063932e-09	2.92426e-08
MELK	62.1281582567679	-1.13696	0.258534459375362	-4.39770992736071	1.09399053550592e-05	5.6423e-05
MEOX2	12.3367486295362	-1.86096	0.309337786110587	-6.01593747023353	1.78848604067597e-09	2.3987e-08
MESP2	3.5978180728425	-1.21417	0.236932040468805	-5.12456744230928	2.98221591191335e-07	2.30152e-06
MESTIT1	92.0957969514132	0.696526	0.141883603103299	4.90913949951049	9.1476892038702e-07	6.23384e-06
MET	108.575558063047	-1.48318	0.255511505042946	-5.80472906685872	6.44701662754338e-09	7.39972e-08
METTL7B	219.852661429455	-1.95399	0.235641933659925	-8.29219575216643	1.11176764680485e-16	9.47206e-15
MFAP2	20.7455353698481	-1.41353	0.304182549768479	-4.64697355089238	3.36840334240612e-06	1.99892e-05
MFAP4	374.862815013159	-1.0429	0.17605121108621	-5.92382229269618	3.14543359386734e-09	3.92976e-08
MFAP5	7.79950546029197	-1.89521	0.288357936443501	-6.57240647427588	4.95084854851187e-11	9.94283e-10
MFNG	221.145187646788	-0.586169	0.112095394994179	-5.22919923088439	1.70245823642531e-07	1.39752e-06
MFSD7	33.1559143717091	-0.792056	0.126649819085224	-6.2539063122891	4.00311211099254e-10	6.41813e-09
MGC12916	1.43853045370407	-1.72159	0.380752419488928	-4.52155105363847	6.13881495928655e-06	3.37574e-05
MGC16703	56.6656663927087	0.63006	0.110785466538211	5.68720494961731	1.29135444837332e-08	1.38059e-07
MGC29506	2.298012303831	-2.54074	0.417126037190631	-6.09105494905793	1.1216903851219e-09	1.57503e-08
MGC45800	9.37961873006171	-1.91053	0.292623678224936	-6.52895253037366	6.62312360528817e-11	1.28752e-09
MGC87042	13.230592539171	-0.855406	0.189813637384926	-4.50655635175542	6.58881930515984e-06	3.59255e-05
MGMT	93.5837397705721	-0.916853	0.153606908109703	-5.96882727722286	2.38964915774522e-09	3.08723e-08
MGST2	181.918789949558	-0.68265	0.0914541992983671	-7.46439490233205	8.36832762555227e-14	3.39294e-12
MIA	4.35653910022255	-1.58868	0.351726188387403	-4.51681160166623	6.27777118479331e-06	3.43944e-05
MICAL1	1567.05320803785	0.766827	0.135161367509705	5.67342085371571	1.39973785769351e-08	1.48578e-07
MICALL2	350.06012488945	-0.597638	0.132255672187343	-4.51881103402836	6.2187865956935e-06	3.41195e-05
MICB	28.0104131199626	-1.14456	0.16171090205789	-7.07781555753975	1.4644445159853e-12	4.33064e-11
MINA	400.609252288604	-0.654551	0.124153930951435	-5.27209326333436	1.34876504353173e-07	1.14208e-06
MIR155HG	3.82115066203004	-0.976223	0.221200534100014	-4.41329445618161	1.01809375288917e-05	5.28731e-05
MITF	180.207775997152	-0.652016	0.123130575834479	-5.29531985614764	1.18808266316823e-07	1.01581e-06
MLF1IP	131.462237960906	-0.899811	0.198353509059794	-4.53639935530822	5.7222777778415e-06	3.18014e-05
MLXIPL	129.094792409255	-0.945031	0.18363990887175	-5.14611125527884	2.65941735609959e-07	2.08231e-06
MMD2	1105.12819769459	1.11807	0.163926221379011	6.82056171327323	9.06852199522827e-12	2.19781e-10
MMEL1	7.1979931723461	-3.59924	0.438972878008761	-8.19922584300996	2.41940017692104e-16	1.87916e-14
MMP14	1024.53305575716	-1.10188	0.180383841199542	-6.10851988079346	1.00559335331255e-09	1.42687e-08
MMP16	665.871655812092	0.748186	0.159632663272858	4.68692155559163	2.77345209490779e-06	1.6841e-05
MMP7	8.20410864591608	-3.30544	0.481806847097531	-6.860513782183	6.86133233970971e-12	1.71223e-10
MMP9	41.4173790666884	-2.37323	0.355758000184991	-6.6709190827984	2.54206361083762e-11	5.48088e-10
MND1	17.6280516899397	-0.979513	0.209602086150918	-4.67320456701836	2.96536143081797e-06	1.78383e-05
MNDA	133.013373875681	-0.721362	0.149116446364225	-4.83757715685958	1.31431371777958e-06	8.61363e-06
MOCOS	4.11017676926937	-1.27419	0.265083193099713	-4.80675056661254	1.53403187172859e-06	9.92247e-06
MORN3	12.4878635654678	-1.53621	0.240440250035712	-6.38913605336977	1.66825582870329e-10	2.92104e-09
MORN5	22.8487480968468	-1.35749	0.186217480085895	-7.28980102835702	3.1041311540166e-13	1.09552e-11
MOSC1	533.26464662496	0.641349	0.0983649208172191	6.52009464346016	7.02630428080718e-11	1.35213e-09
MOXD1	198.507960260697	-3.25805	0.305133470134734	-10.6774566185512	1.29778592279547e-26	1.3944e-23
MPL	14.493726333841	-1.12072	0.177551204218293	-6.31210914783818	2.7525797433191e-10	4.60111e-09
MPZL2	33.3232655237551	-1.15606	0.229532693534076	-5.03659607241617	4.73883314361328e-07	3.48078e-06
MRC1	166.875259476028	-0.912768	0.209042356342214	-4.3664263089159	1.26295869874225e-05	6.39917e-05
MRC2	1117.24065255111	-1.33811	0.162109916578454	-8.25432943174648	1.52757467192577e-16	1.26253e-14
MRGPRF	62.1560014648199	-0.704486	0.161269934855297	-4.3683669796298	1.25179023726508e-05	6.3509e-05
MRPS15	353.767819212866	-0.858496	0.0705199808708742	-12.1737972981984	4.28666152776961e-34	1.65808e-30
MS4A4A	154.08235953616	-0.883713	0.181670124262278	-4.86438440050346	1.14813586105654e-06	7.62533e-06
MS4A6A	335.774165084977	-0.956543	0.201693673342496	-4.74255532026147	2.1103917335709e-06	1.32259e-05
MS4A7	388.292775168045	-0.796338	0.165959898291308	-4.79837365832083	1.59959157340356e-06	1.03086e-05
MSL3L2	24.8984638936863	-1.654	0.209093973892242	-7.91029592300796	2.56777783487998e-15	1.52803e-13
MSLN	11.5995556141346	-1.68595	0.293062090382047	-5.75288326390167	8.7734070635339e-09	9.72195e-08
MSN	2508.48427311779	-1.30837	0.134654941432509	-9.71648732255437	2.56476879331261e-22	9.09579e-20
MSR1	233.011131401559	-1.17926	0.195168444215848	-6.0422580331156	1.51972160851672e-09	2.0742e-08
MSRB3	346.503240748423	-0.627173	0.0978783483813218	-6.40767810363302	1.477524416724e-10	2.624e-09
MST1	370.68866485563	0.84146	0.153315346279186	5.48842358317155	4.05536641241578e-08	3.87313e-07
MSX2P1	6.31672008080297	1.11756	0.216715557165792	5.15679452962754	2.51213203574196e-07	1.97499e-06
MT1A	6.35539786408986	-1.44462	0.296208433250099	-4.87702809886742	1.07696099050725e-06	7.2043e-06
MT1E	777.211651712322	-1.08498	0.167356978490915	-6.48303243824535	8.9897160297012e-11	1.6929e-09
MT1L	29.4139157470004	-0.936966	0.170941898257952	-5.48119348496556	4.22466145852688e-08	4.00318e-07
MT1M	176.294017634673	-1.06393	0.184597611541976	-5.7635110606142	8.23818515805302e-09	9.18838e-08
MT3	6733.65353972482	-0.754499	0.175008820788207	-4.31120822659214	1.62364916527504e-05	7.98408e-05
MTL5	4.92146704506611	-1.24398	0.216854497157163	-5.73647813520485	9.66655224774699e-09	1.06343e-07
MX1	675.443723972101	-1.06246	0.140479012721001	-7.56315243846727	3.93416088485436e-14	1.72924e-12
MX2	68.3520412223484	-1.38449	0.183098467912425	-7.56144802705147	3.98606687422822e-14	1.74019e-12
MYADM	743.780338036173	-0.748461	0.125055017103621	-5.98505585730248	2.16315613557117e-09	2.83438e-08
MYBL2	174.760992024662	-1.31247	0.280619485153487	-4.67702945721617	2.91060459911267e-06	1.75635e-05
MYBPC1	499.52105451588	-1.01354	0.218873672394559	-4.63072784864693	3.64382557836608e-06	2.14199e-05
MYBPHL	6.54970064931271	-1.28599	0.227073882119524	-5.66329834479967	1.48490652152204e-08	1.56844e-07
MYCBP	125.63626123804	-0.914908	0.0979005321529822	-9.34527711650087	9.16491564287874e-21	2.30194e-18
MYCBPAP	8.3466134797672	-1.13477	0.221835901510392	-5.11537163984107	3.13123824968327e-07	2.4031e-06
MYH11	303.860956493531	-1.58158	0.257579009910568	-6.14017785416673	8.24291380838971e-10	1.19865e-08
MYH6	57.0119086333752	1.07083	0.195061179437648	5.48971878279238	4.02574181434522e-08	3.85054e-07
MYH7	1398.00965095606	1.05092	0.180530847488112	5.82126809089982	5.8402801073334e-09	6.78539e-08
MYL12A	798.528001584836	-0.870388	0.108667019874851	-8.00967536300874	1.15011633096109e-15	7.59155e-14
MYL9	523.433754027294	-0.905557	0.15138943193143	-5.9816377297648	2.20905153571696e-09	2.8828e-08
MYLK	975.379048836852	-0.747428	0.135606841378369	-5.51172551477966	3.55332766763659e-08	3.44295e-07
MYO1D	429.143589093452	-0.89915	0.178541082815616	-5.03609360830121	4.75128274772965e-07	3.4886e-06
MYO1F	292.394931986373	-0.770519	0.132472221231385	-5.81645402707453	6.01090640983216e-09	6.94865e-08
MYO1G	23.8428601707348	-0.905312	0.212580518441982	-4.25867972456564	2.05637850573403e-05	9.84171e-05
MYO3A	2.68505047394322	-3.54421	0.539288005524091	-6.5720107334298	4.96402836055627e-11	9.94863e-10
MYO3B	13.64246746096	1.2886	0.265166303353254	4.85958695760364	1.17630907286216e-06	7.79905e-06
MYO5B	79.0932290918592	-0.928805	0.186340979157273	-4.98443511401543	6.2143094901093e-07	4.43323e-06
MYO5C	161.171365311545	-0.670533	0.155094461574222	-4.3233829496462	1.53654677104534e-05	7.60994e-05
MYO7A	165.060018147262	-0.603491	0.137547888687592	-4.38749574649722	1.14663235408742e-05	5.88063e-05
MYO7B	51.5267154431593	0.807092	0.173013176090067	4.66491758877838	3.08740748218616e-06	1.84691e-05
MYOCD	4.92349534074476	-1.97648	0.331395033499484	-5.96412970617356	2.45941322473849e-09	3.16678e-08
MYOF	367.262816108947	-0.664343	0.150063744308112	-4.42707481114422	9.55196108428564e-06	4.99554e-05
MYOM3	0.802972678898754	-2.16305	0.500802804057294	-4.31917451491276	1.56613903560535e-05	7.74658e-05
MYOZ1	89.1142485570012	0.803064	0.174165109878961	4.6109369387002	4.00858136659555e-06	2.33161e-05
MYT1	1486.91432882674	1.03252	0.166794837179495	6.1903449281095	6.00327017188327e-10	9.05642e-09
NADK	715.861953130898	-0.593384	0.0649077849241753	-9.1419496752366	6.13363805547391e-20	1.21045e-17
NAPSB	134.073758478615	-1.24048	0.253033092405849	-4.90242776525293	9.46594277096154e-07	6.44164e-06
NAT2	4.18149214891258	-1.46364	0.283973192436549	-5.15413592705342	2.54803075457674e-07	2.00158e-06
NAV1	5287.81426656452	0.715457	0.0793710876431184	9.01408188788156	1.98526344611326e-19	3.49045e-17
NBL1	1492.64721311154	-0.604593	0.120205111146997	-5.02967401248255	4.91314432525849e-07	3.58567e-06
NCF1	40.697420047261	-1.13749	0.165923157711796	-6.85550012753795	7.10634586102353e-12	1.76427e-10
NCF1B	13.2224434045347	-1.09832	0.167230271689438	-6.56770382745188	5.10970431875509e-11	1.01983e-09
NCF1C	11.6524038193968	-1.29214	0.218461414979179	-5.91475087579582	3.32378268692921e-09	4.12858e-08
NCF2	136.563025916735	-0.592883	0.135233251965245	-4.38415299389682	1.16437923005762e-05	5.96059e-05
NCF4	97.7343487614117	-0.86315	0.145134095925741	-5.94725673942338	2.7267355665565e-09	3.4717e-08
NCKAP1L	300.60967087943	-0.834201	0.143433796191687	-5.81592725569075	6.02986864624194e-09	6.96641e-08
NCRNA00085	77.2973771922441	-0.627011	0.112426988589567	-5.57705271097038	2.44627761850061e-08	2.44501e-07
NCRNA00092	55.0226271751009	-1.23003	0.204188485001393	-6.0239921955777	1.70166574900986e-09	2.2969e-08
NCRNA00095	70.3807570192762	0.637552	0.134594666564273	4.73682832309672	2.1708891460337e-06	1.35742e-05
NCRNA00152	34.6783957014147	-1.02505	0.224865027239403	-4.55852459626131	5.15142323659663e-06	2.89786e-05
NCRNA00176	96.0684374548257	1.25692	0.176322550635325	7.12853774304595	1.01440784601516e-12	3.16567e-11
NCRNA00181	71.0705129624972	-0.61856	0.122905454120785	-5.03280983370439	4.83342534463956e-07	3.53683e-06
NDUFA3	629.20482910139	-0.596059	0.0879318957035547	-6.77864228875579	1.21310466392808e-11	2.83693e-10
NEAT1	1807.39632321975	-0.711977	0.149440880527062	-4.76427413220703	1.89534688355762e-06	1.20184e-05
NECAP2	954.353439745208	-0.627098	0.0815698188793666	-7.68786505777416	1.49610480825132e-14	7.41915e-13
NEK11	239.85555965543	-0.59916	0.116121308595957	-5.15977855084506	2.47242114101603e-07	1.94852e-06
NEU4	1716.67226336036	0.871882	0.19248537588217	4.52960170802001	5.9094981711649e-06	3.26542e-05
NEUROD1	140.220150898789	0.822301	0.172141221208244	4.77689652673768	1.78021318702938e-06	1.13703e-05
NEXN	69.1970638472625	-1.12157	0.149755794423654	-7.48931964795681	6.92315445313836e-14	2.87326e-12
NFAM1	122.903269325134	-0.741456	0.124460240751279	-5.95736939023381	2.56330422501651e-09	3.28869e-08
NFATC1	163.411536718607	-1.29514	0.156123866366157	-8.29560152221672	1.08037113925002e-16	9.2453e-15
NFE2L3	75.6983218346796	-0.790392	0.127473957573457	-6.20042062782929	5.63124542576005e-10	8.53513e-09
NFIA	2049.16596726706	-0.733711	0.106048679099554	-6.91862168111778	4.56058971533235e-12	1.18392e-10
NFKBIB	413.802587754727	-0.635178	0.0856654780087421	-7.41462851304415	1.21966190979966e-13	4.71765e-12
NGFR	448.778398810482	-1.2588	0.217687263733056	-5.78258848554568	7.35598539337443e-09	8.29049e-08
NHLH2	8.08026971892498	-1.54791	0.286806100913104	-5.39705476518531	6.77437152491643e-08	6.10514e-07
NHLRC1	51.6019071647038	-0.795666	0.154939016081092	-5.1353489656624	2.81620970261226e-07	2.19089e-06
NID2	230.684076951748	-0.999007	0.197939549575884	-5.04703034410513	4.48730104662949e-07	3.31872e-06
NINJ1	1011.85908149184	-0.619256	0.116789708595623	-5.30231546550821	1.14343026893595e-07	9.80228e-07
NINJ2	108.232722696005	-0.958601	0.215731011029987	-4.44349918773391	8.8507490681647e-06	4.6654e-05
NIPAL3	1348.3012168854	-0.668904	0.157041409351974	-4.25940871811367	2.04968381185205e-05	9.81992e-05
NIPSNAP3A	287.846261029331	-0.712296	0.097750847601128	-7.28685209792017	3.1728088327159e-13	1.11163e-11
NKAPL	15.5546723210647	-0.814894	0.184489331982746	-4.41702553073292	1.00068414500588e-05	5.21229e-05
NKG7	12.8580395298129	-1.17721	0.221890185118117	-5.30538406406337	1.12436011026704e-07	9.66021e-07
NKX2-1	1.29953071328862	-2.54673	0.413229822530417	-6.16298051259443	7.13882958493525e-10	1.05716e-08
NKX6-1	3.80758320375543	-1.39676	0.256853610383676	-5.43796673909923	5.38920316356862e-08	4.95848e-07
NLGN3	4750.39514596638	0.780855	0.0994642080248698	7.85061353047924	4.14006901710315e-15	2.33437e-13
NLRC4	28.7602383150326	-0.674881	0.121531700696826	-5.55312732637338	2.80603528012736e-08	2.77731e-07
NLRP3	111.79505613347	-0.908924	0.148712207872062	-6.11196737127791	9.84103079246877e-10	1.40048e-08
NME5	98.8910945307131	-0.945323	0.131926480524845	-7.1655293738038	7.74865395943096e-13	2.49349e-11
NMI	107.3212569359	-0.687091	0.120612689379463	-5.69666937584573	1.22170516537721e-08	1.3112e-07
NMRAL1	476.124453396747	-0.651041	0.134553605989067	-4.83852400813117	1.30806897426237e-06	8.57852e-06
NNAT	712.27548523573	-1.60904	0.283391061105465	-5.67780806413927	1.3643167372031e-08	1.45137e-07
NNMT	58.3746146703171	-2.04242	0.225517766665783	-9.0565695733275	1.34617584134779e-19	2.41065e-17
NOD1	113.189532543003	-0.592719	0.087206634741429	-6.7967193113963	1.07028330283151e-11	2.54291e-10
NOG	462.764048608075	1.16306	0.145768402579328	7.9788165098176	1.47743013969478e-15	9.4302e-14
NOV	137.522877943821	-0.789733	0.176310357943917	-4.47922041033623	7.49161461437696e-06	4.02243e-05
NPC2	1476.30819681779	-0.704432	0.109060693841944	-6.45908679211248	1.05336689676617e-10	1.9402e-09
NPNT	281.40871930273	-1.93739	0.212198396763492	-9.13007038732557	6.84547728049135e-20	1.31081e-17
NPTX2	626.721623178663	-1.14709	0.25285393580694	-4.53657156539027	5.71760931937987e-06	3.17846e-05
NPY2R	22.4486368542996	-1.80921	0.314361068715878	-5.75520572115936	8.65363463930177e-09	9.60191e-08
NR2E1	279.551027794286	-0.818202	0.157683227343917	-5.18889688573253	2.11543489159607e-07	1.6948e-06
NR2F2	342.710825146421	-1.10935	0.158276510796718	-7.00895156882054	2.40110544340281e-12	6.68164e-11
NR4A2	133.703420658831	-0.811887	0.178367472420887	-4.55176869354866	5.31968028900392e-06	2.97865e-05
NR4A3	135.597653835854	-0.933264	0.202043144512177	-4.6191328985361	3.85346994648552e-06	2.24848e-05
NSUN7	12.8135963722211	-2.44373	0.227692455978432	-10.7325809377608	7.15688391259738e-27	8.14201e-24
NT5DC3	872.965508360206	-0.714664	0.149516747286736	-4.77982291683172	1.7544966102728e-06	1.12209e-05
NTAN1	164.960165323849	-0.644468	0.0751518562345279	-8.57554229138245	9.8621005393528e-18	1.0899e-15
NTN5	11.1347016198168	-0.702008	0.162155212571331	-4.32923251812272	1.49629886570141e-05	7.43345e-05
NTNG1	109.920883470159	-1.1769	0.195707279187761	-6.01359128122381	1.81457675866682e-09	2.42755e-08
NTS	3.06165924892065	-3.43351	0.768560141122551	-4.46745311132558	7.91563537249866e-06	4.21454e-05
NUAK2	54.5182756917245	-0.795985	0.159860882002362	-4.97923718007505	6.38353744338482e-07	4.53754e-06
NUDT14	192.845303117375	-0.868894	0.136547157248546	-6.36332718189487	1.97429508750006e-10	3.40008e-09
NUDT16P1	9.8047120606331	-1.04445	0.157685377955441	-6.62365377983997	3.50426999605728e-11	7.30308e-10
NUF2	77.364851959434	-0.931712	0.190398439185964	-4.89348291260211	9.90669193868658e-07	6.69212e-06
NUMBL	751.203303205348	-0.631516	0.104197915787082	-6.06073421231717	1.35501583165099e-09	1.86652e-08
NUP62CL	2.55866415881623	-2.71504	0.439962166374994	-6.17108275908878	6.78239075591368e-10	1.01213e-08
NXF4	2.75022123599124	1.60738	0.312074911615088	5.15063688232918	2.59603380188583e-07	2.03681e-06
NXNL2	2.08135995964664	-1.48241	0.304366144274406	-4.87047261946968	1.11331628747372e-06	7.42467e-06
OAS1	202.431653010394	-1.0513	0.182442915544716	-5.76235973187229	8.2945970945361e-09	9.24597e-08
OAS2	250.436098618329	-1.00564	0.157785792476048	-6.37343324997875	1.84842747502836e-10	3.20328e-09
OASL	30.9323352587851	-1.28705	0.204995314200028	-6.27844101898555	3.41984712170303e-10	5.56264e-09
OBFC2A	75.2575557658364	-0.611412	0.121805690912158	-5.01957116019083	5.17869591529018e-07	3.7582e-06
OCIAD2	138.005432356803	-1.47171	0.193246374705102	-7.61569353024267	2.62279334339898e-14	1.20773e-12
ODF2L	127.865939500039	-0.670706	0.112606218396616	-5.95620457431282	2.58163138156878e-09	3.30873e-08
ODF3L2	6.89285276747653	-1.0137	0.190029070219353	-5.33446999441552	9.58240311051088e-08	8.34415e-07
ODZ3	279.468016407989	-1.10871	0.24921192458025	-4.44884485863931	8.63333454437714e-06	4.56199e-05
OGN	58.630173570032	-1.18314	0.242932155778836	-4.87026197010734	1.11450387045873e-06	7.43003e-06
OIP5	25.7828268390543	-0.815782	0.191029054163738	-4.27046092892179	1.95069393844031e-05	9.39871e-05
OLFML1	32.8852248352979	-0.67615	0.142456738847349	-4.74635039840382	2.07119785217347e-06	1.29971e-05
OLFML2B	226.989547393309	-1.4435	0.181118993964588	-7.96989318978911	1.58811567146353e-15	1.00702e-13
OLFML3	487.982764388374	-1.06605	0.137450236657343	-7.75587140306236	8.77388990358006e-15	4.57377e-13
OLIG1	14114.6601552008	0.667327	0.153856344565563	4.33733724124834	1.44219255452541e-05	7.20351e-05
OLR1	352.905496712445	-0.887326	0.207627974253526	-4.27363522311617	1.92311563712065e-05	9.28666e-05
OPLAH	107.504288373499	-1.0329	0.179341675204024	-5.75937558573352	8.44256597603582e-09	9.39466e-08
OPN3	154.959707586854	-0.730888	0.141959881203003	-5.14855349821005	2.62502920063383e-07	2.05705e-06
ORC1L	27.3836662566682	-1.32079	0.214008670496805	-6.17165084923761	6.75806098356084e-10	1.00927e-08
OSBPL10	99.7834154218978	-0.864598	0.175637814135558	-4.92261693009894	8.53945087992818e-07	5.86689e-06
OSBPL9	723.541209133725	-0.624945	0.0994179061205519	-6.2860423391828	3.25661163387401e-10	5.324e-09
OSCAR	48.551217978247	-0.66066	0.136248001815111	-4.84895070077522	1.24116259687472e-06	8.18693e-06
OSCP1	150.529186780499	-0.850254	0.100629984693108	-8.44930628383	2.93038781622291e-17	2.80563e-15
OSM	30.4135264853373	-1.27258	0.257199372143127	-4.94782928200431	7.50456825342483e-07	5.21893e-06
OSMR	188.344703096041	-0.960464	0.175747891738475	-5.46501217316752	4.62875037872964e-08	4.34563e-07
OSR1	29.7472529365346	-1.71901	0.265020350082412	-6.48632711084456	8.79541004680736e-11	1.66053e-09
OSR2	4.47854383483464	-3.62127	0.595129791702226	-6.0848375792927	1.16609461182432e-09	1.63068e-08
OSTF1	344.571335056069	-0.837928	0.096065823473237	-8.72243916896166	2.7227195916795e-18	3.39725e-16
OTOF	28.9907961892008	-1.31159	0.2623688104287	-4.99902890792381	5.7619764777272e-07	4.14417e-06
OTOS	7.4993189614312	-3.17813	0.392134889090383	-8.10468842262495	5.28808582397751e-16	3.9035e-14
OTP	2.91104403038477	-4.35184	0.782636065404229	-5.56048550180461	2.69025201603461e-08	2.67504e-07
OTX1	22.4628863112679	-1.66945	0.226386742373291	-7.37432246759904	1.65182931407236e-13	6.21525e-12
OXER1	11.5110521243629	-0.745224	0.145338034476503	-5.12752445931482	2.93576849033348e-07	2.2702e-06
OXTR	207.194619304122	-0.978199	0.223272392698843	-4.38119161294664	1.18032013116172e-05	6.0358e-05
P2RX1	9.66723448012169	-1.51138	0.253199426413846	-5.96914372251814	2.38501953314533e-09	3.08331e-08
P2RX3	0.932241006520616	2.37885	0.505803500847722	4.70310910001763	2.56229411679048e-06	1.56819e-05
P2RY13	196.705030931773	-0.750775	0.158644142213547	-4.73244897181908	2.218270812098e-06	1.38302e-05
P2RY2	4.37930318144125	-1.5226	0.230125586534931	-6.61639486614521	3.68064419351433e-11	7.61103e-10
P2RY6	18.1899034328698	-0.728307	0.169594062459536	-4.29441259863973	1.75156466001606e-05	8.53711e-05
P4HA3	4.89270031882272	-1.35411	0.267648344897224	-5.05929427595096	4.20811009440469e-07	3.13557e-06
PALM2-AKAP2	416.157202025302	-0.616617	0.109568644815539	-5.62767558804432	1.82654195516915e-08	1.88301e-07
PALMD	182.62055319621	-0.61416	0.108650610183524	-5.65261062534424	1.58029023821455e-08	1.66102e-07
PARP12	219.551773989094	-0.643141	0.127322739820297	-5.05126877239269	4.38884999222817e-07	3.25212e-06
PARP15	2.56858372112691	-1.17414	0.274573306189702	-4.27625270171835	1.90065470181285e-05	9.18967e-05
PARVB	188.06872927303	-0.731589	0.112284077060696	-6.51551746408046	7.24394942471877e-11	1.39124e-09
PARVG	189.98552928386	-0.742014	0.144825186362616	-5.12351520427482	2.99891451518118e-07	2.31294e-06
PAX2	4.75089727779256	-1.71404	0.332658795203859	-5.15256147587886	2.5695234315136e-07	2.01764e-06
PBXIP1	5133.59084822628	-0.654607	0.127982971909023	-5.11479547997086	3.14081075183943e-07	2.40949e-06
PCDH20	392.898398073136	0.92597	0.188193462261835	4.92030959798032	8.64074223317045e-07	5.91547e-06
PCDHA4	291.772592740068	1.11145	0.258807341100682	4.29450899902767	1.75080380138856e-05	8.53555e-05
PCDHB19P	36.4997703920318	0.654267	0.138346422118305	4.72919663427867	2.25409991210767e-06	1.40265e-05
PCDHB2	391.732834332877	0.847455	0.197355102311006	4.29406284055353	1.75432783910111e-05	8.54627e-05
PCDHGA3	163.673435528596	1.00208	0.227005025060652	4.4143601747729	1.01309169949605e-05	5.26557e-05
PCDHGC3	35968.6903753598	0.630586	0.0840074744126302	7.5063134574609	6.08156957249741e-14	2.5569e-12
PCDHGC4	1438.07645037683	1.14144	0.173809008610981	6.56721833248189	5.12638558342933e-11	1.02211e-09
PCDP1	47.1842472437693	-1.25262	0.212121544015919	-5.90521718289348	3.5218247607159e-09	4.34111e-08
PCOLCE	168.159689265011	-1.20697	0.193125702701341	-6.24967518468553	4.11307167903864e-10	6.55246e-09
PCOTH	9.20851731073598	-0.901402	0.157128942279053	-5.73669979925151	9.65391491040128e-09	1.06264e-07
PCP4	155.460724193935	-1.13105	0.252387936752922	-4.48140456336131	7.41533916451475e-06	3.98701e-05
PDCD1LG2	19.4322215888619	-1.59639	0.203452576593965	-7.84647867244191	4.27881478551467e-15	2.40559e-13
PDE6B	120.897810360286	-0.98359	0.177712752425573	-5.53471599804621	3.11733051648334e-08	3.04799e-07
PDE6G	3.59538195919602	-0.940317	0.210028142337918	-4.47709772908635	7.56646179819159e-06	4.05698e-05
PDE8A	534.431855924367	-1.041	0.144301519646111	-7.21405112605656	5.43113491135361e-13	1.80789e-11
PDGFA	572.899772377947	-0.840305	0.152826382381734	-5.49842861393384	3.83190606618028e-08	3.69069e-07
PDGFD	70.6901171865569	-2.05957	0.245716325007012	-8.38191961362497	5.20713942922963e-17	4.7728e-15
PDGFRL	25.1447179101185	-0.685229	0.148074654799449	-4.62758861350784	3.69947957061228e-06	2.17009e-05
PDIA5	67.8420798199164	-1.39358	0.157658747711857	-8.83920274563046	9.64040385323997e-19	1.36092e-16
PDK3	66.3146705198639	-0.720322	0.135371682040725	-5.32106778078192	1.03159955135039e-07	8.93074e-07
PDLIM1	142.758740830668	-1.2086	0.192106373991341	-6.29132970210122	3.14757998856921e-10	5.17198e-09
[truncated: 742 more rows]

## Sheet: DAVID_analysis
Category	Term	Count	%	PValue	Genes	List Total	Pop Hits	Pop Total	Fold Enrichment	Bonferroni	Benjamini	FDR
[truncated: 1,399 more rows]

[truncated: 1 more sheets: DAVID_analysis_UP_DOWN]
