# Supplementary material for: Transmembrane Protein TMEM230, a Target of Glioblastoma Therapy
Source: Front Cell Neurosci. 2021 Nov 17;15:703431. doi: 10.3389/fncel.2021.703431 (PMC8636015; doi:10.3389/fncel.2021.703431)
Supplement: Supplementary Table 4 — All enriched pathways identified different between high or low TMEM230 expression in astrocytoma of patients from DEG. [file Table_4.XLSX]

## Sheet: all_genes
gene_name	baseMean	log2FoldChange	lfcSE	stat	pvalue	padj
A1BG	124.6040793529	-0.202545999805343	0.133856270295106	-1.51316034249872	0.130238934962122	0.201408937745914
A1CF	0.0153452056080372	-0.016336169357675	2.90030575372639	-0.00563256799276624	0.995505884724162	0.997580121386579
A2BP1	304.869868655733	0.867099860536538	0.260330545112846	3.3307649709744	0.000866076929322006	0.0023031572318851
A2LD1	52.1615548871413	-1.24594483901256	0.140933672364447	-8.84064693773544	9.51659404502949e-19	4.66026175722675e-17
A2M	17106.9830579143	-0.731512774202651	0.113680536733784	-6.43481105227101	1.23627020660678e-10	1.30737419027489e-09
A2ML1	190.208775772985	-0.524965815559303	0.230189698537285	-2.2805791001732	0.0225733651929149	0.0431074747805127
A4GALT	123.008156731446	-0.669019153418918	0.131890213938414	-5.07254582005087	3.92528579243053e-07	2.10290874366331e-06
A4GNT	0.540370601570424	-0.778193893123532	0.367379275188474	-2.11823024781216	0.0341555726659542	0.0623248863645208
AAA1	0.137202385373614	-0.298619342645253	1.02545298733428	-0.291207248244047	0.770892819393769	0.875769471321086
AAAS	730.431499379473	0.219553641213275	0.0551831574238303	3.97863499413433	6.9312053483788e-05	0.000235306030726185
AACS	422.595913050681	0.312028451620611	0.086696795501567	3.5990771033166	0.000319348503006793	0.00093878221640195
AACSL	0.642180143804204	1.10007415191426	0.416030345907322	2.64421613167449	0.00818803545134734	0.0174524071464085
AADAC	0.0727433457411728	-0.216521309693674	1.69450247934173	-0.127778691582551	0.898324113467244	0.973929853227823
AADACL2	0	NA	NA	NA	NA	NA
AADACL3	0.00504354394914944	-0.0172286700452834	2.90030575372639	-0.00594029440625272	0.995260358681341	0.997580121386579
AADACL4	0	NA	NA	NA	NA	NA
AADAT	257.077496627592	0.380017230393828	0.0712085926576994	5.33667660335004	9.46656649995097e-08	5.73526207908127e-07
AAGAB	682.683344224754	-0.344850768512662	0.0480940333246809	-7.17034410868782	7.48094887661485e-13	1.17394278265075e-11
AAK1	1178.44349111755	0.194767950340537	0.0716230136351919	2.71934871845211	0.00654106082695197	0.0142984831221729
AAMP	2649.3659973896	0.122666372414833	0.0381111820369478	3.21864518124656	0.00128797751385122	0.00330081285272325
AANAT	3.13267159585867	-0.0378572202032605	0.201540605308671	-0.187839170897001	0.851002728338987	0.939133864182484
AARS	6089.57197002715	0.154803430723606	0.0491843920640939	3.14740966040357	0.00164723998636413	0.00411809996591033
AARS2	472.526494514664	0.0187333437339933	0.0431257191321734	0.434389132771992	0.664005887871957	0.781458427956439
AARSD1	587.635791584573	0.170927200076207	0.0561752026499624	3.0427518195401	0.00234425583806781	0.00567642518125749
AASDH	333.02872929878	-0.0881889009371424	0.0644345679399455	-1.36865821804433	0.171106136565908	0.254608230391628
AASDHPPT	1523.37810341712	0.197048079529473	0.052739362469319	3.73626206885048	0.000186776011330172	0.000577509551835334
AASS	1387.02354446555	0.0316496519550072	0.0904273958103019	0.350000701351631	0.726338171297968	0.83864519896904
AATF	1291.37374949531	0.179654307419652	0.0566123892572649	3.17340973904573	0.00150659738913028	0.00379472513752251
AATK	1514.37292623853	0.309790576219481	0.160026798469377	1.93586686219161	0.0528840092692723	0.0917288691637408
ABAT	9100.74980470943	0.283000567509632	0.101535500069297	2.78720809289841	0.00531643275862045	0.0118868044585881
ABCA1	2779.39532946244	-0.0294630416839755	0.111852951238492	-0.263408710791677	0.792235577372714	0.892885641762227
ABCA10	5.5556253629242	-0.175402308248421	0.198827235722758	-0.882184513659884	0.377677035151179	0.494552903459854
ABCA11P	121.562857623358	-0.115499150784512	0.0803166526163304	-1.43804736654362	0.15042061503871	0.228122125902632
ABCA12	7.7202657258712	-0.840729047293659	0.248079182945336	-3.38895443508016	0.000701596678223816	0.00191324622555173
ABCA13	28.6184805823761	-2.81605138809855	0.26136956447077	-10.7742131100864	4.55661533292612e-27	1.23345045609347e-24
ABCA17P	49.2881652641036	0.27120250430374	0.136481894374459	1.98709510552113	0.0469118585411778	0.0825862273478055
ABCA2	7326.38373056025	-0.028669475184857	0.134860565644556	-0.212586051733013	0.83164985187647	0.92500460041502
ABCA3	4433.8734373714	0.293745697050341	0.0658799434824805	4.45880311248988	8.24185834184452e-06	3.36970461679357e-05
ABCA4	6.24621611175066	0.189365403502812	0.185438803351191	1.02117464134076	0.30717170448638	0.417138832249132
ABCA5	166.780813486884	-0.946261864743474	0.208646822743971	-4.53523256332843	5.75400468707578e-06	2.43002278117241e-05
ABCA6	52.8867593253744	-0.27159490406878	0.264026373427546	-1.02866581297535	0.303636740041991	0.413364798791943
ABCA7	199.795246289568	-0.404840465173565	0.13303225429823	-3.04317526083562	0.00234095950703189	0.00566914771273005
ABCA8	615.343536445656	-0.590023225923287	0.169122637343639	-3.48873004342063	0.000485321016699726	0.00136887215853512
ABCA9	59.0742512746499	-0.0545897195186694	0.165506583615744	-0.329834126994067	0.741525299416169	0.851589657982507
ABCB1	671.525240633722	-0.0197592405247765	0.110754189283875	-0.178406258512998	0.858403934571019	0.945029581251702
ABCB10	283.683740260047	0.0662878223925283	0.0473456011105676	1.40008408041381	0.161488141654875	0.242133906152721
ABCB11	1.45219688404992	-3.22401027626245	0.529998899335385	-6.08305088992701	1.17916899640816e-09	1.02809026317607e-08
ABCB4	61.5163942256018	-0.741524266977205	0.155636659190821	-4.76445762092622	1.8936230923706e-06	8.85265389069393e-06
ABCB5	0.218678435790722	-0.847734638274244	1.80113368008005	-0.470667251215115	0.637878374279327	0.757879146226779
ABCB6	849.932937988617	0.2795016725825	0.0620017418156653	4.50796484739856	6.54524167448571e-06	2.73689680831852e-05
ABCB7	421.531491753068	-0.0254379055069408	0.0448204817467409	-0.567550916803576	0.570339943704198	0.693704786744559
ABCB8	850.465791428649	-0.229952561781403	0.0681775117579375	-3.37285060501832	0.000743943054033699	0.00201297377802538
ABCB9	207.881230049435	-0.29086497687631	0.113931071945456	-2.55299078565292	0.0106802321672981	0.0221232569816813
ABCC1	541.837893118184	-0.523346433503026	0.0973912967001683	-5.37364683739879	7.71599145623771e-08	4.76655066504193e-07
ABCC10	432.022683957787	-0.0105406959793675	0.057602212141357	-0.182991166268067	0.854804949883678	0.942102944652391
ABCC11	16.1295260467831	-0.104790748434548	0.136497407991668	-0.767712368874759	0.442658086148794	0.564546924423505
ABCC12	4.75998415034508	1.33138676795406	0.399468196293279	3.33289803871292	0.00085946433243371	0.00228753788236878
ABCC13	0.580009082294484	-0.162397090289942	0.475769733417264	-0.341335479925358	0.732851040879896	0.843965184752374
ABCC2	7.10195167833461	0.56133769931743	0.163231273167396	3.43891025552298	0.000584060820481336	0.00161856183579998
ABCC3	405.226249006782	-3.34020907822465	0.316346606011083	-10.5587005352845	4.63027099634997e-26	1.01397732268383e-23
ABCC4	423.494808404647	-0.323278808630429	0.0892899812743551	-3.6205496296064	0.000293977851937158	0.000871426362624368
ABCC5	1142.74562519338	0.358321063726525	0.0826710353013988	4.33429994459574	1.4622469304285e-05	5.71126105692412e-05
ABCC6	50.3415122723634	-0.226643528877721	0.13726275109948	-1.65116557159387	0.0987047710310948	0.158138593291906
ABCC6P1	10.5876930817695	-0.226891159500002	0.189308385076506	-1.19852672879919	0.23071202376269	0.328337155395022
ABCC6P2	26.1494362391269	-0.319402789862854	0.135226835791831	-2.36197784258255	0.0181777286201582	0.0355516534535444
ABCC8	343.816532393407	1.32794523839331	0.188281217246669	7.0529883852066	1.75115473470968e-12	2.55655474003683e-11
ABCC9	424.447583320584	-0.201004530280665	0.169607074651342	-1.18511878525036	0.235970484708149	0.334915871465324
ABCD1	320.695747900658	-0.286765455059148	0.0855316898107508	-3.35273926767553	0.000800160461609567	0.00215045882470635
ABCD2	162.67303860839	-0.878358577829712	0.201253731813188	-4.36443374200405	1.27452471492468e-05	5.03353327130334e-05
ABCD3	1723.4157796224	-0.0166736790203917	0.0518233438062191	-0.321740702080879	0.747649140213361	0.856855330045772
ABCD4	892.117803661501	-0.0713902032144675	0.0679344213258731	-1.0508693799277	0.293318585346261	0.401741337202995
ABCE1	1245.27959420453	-0.009725364422152	0.0594460516925396	-0.163599837924518	0.870046172303736	0.953041004821302
ABCF1	1847.05829978427	0.0993508298058727	0.0531458614595006	1.86939917949363	0.0615672986567016	0.10467998349639
ABCF2	1580.43326005953	-0.170753981238016	0.0435572349327571	-3.92022086575567	8.84678521455454e-05	0.000293537357561573
ABCF3	1220.07364729601	0.0290804287682581	0.0524524697263689	0.554414862063946	0.579294957167155	0.702142954924618
ABCG1	736.344352082124	0.106844145927062	0.0967730431422425	1.10406929923674	0.269563077662602	0.374414508526519
ABCG2	1214.97995353707	-0.0203878670561189	0.113770913212066	-0.179201049552238	0.857779839643078	0.944580432490174
ABCG4	48.1060702042267	0.775802588980088	0.212153420058126	3.65679982329549	0.000255383659536745	0.000766819831208006
ABCG5	1.96926118515861	0.0196371222352874	0.194881876510491	0.100764230039781	0.919737622566025	0.988676094192919
ABCG8	0.309105062123625	0.653261700250207	0.749402917752721	0.871709576751024	0.383366834445664	0.500892914349132
ABHD1	27.2088252021695	-0.250760419240477	0.137321530450118	-1.82608232240439	0.0678378625574411	0.11405796594587
ABHD10	826.770391168722	0.0254467235657604	0.0533006397745961	0.477418726555111	0.633063981884982	0.753583155618292
ABHD11	315.269306025158	-0.429121335485698	0.0852125012685554	-5.03589648346644	4.7561755402827e-07	2.50805901731899e-06
ABHD12	2118.72016303007	-0.120821235789519	0.0640457043805709	-1.88648461216974	0.0592296800854499	0.101235329725986
ABHD12B	14.292025186652	-0.576755291574562	0.246168720043889	-2.34292680025201	0.0191331364952613	0.0372309135675562
ABHD13	346.438553807158	-0.00164746715846834	0.056388413940189	-0.0292164124391901	0.976691991587716	0.997580121386579
ABHD14A	557.627363934299	0.285734920814994	0.0835267259575922	3.42088017385077	0.000624188272829711	0.00171852372332972
ABHD14B	582.853058084133	-0.55555211260563	0.083067895789039	-6.687928077732	2.26352324403878e-11	2.71985622850282e-10
ABHD15	215.109599929771	-0.573409274142517	0.0703666499433858	-8.14887840481051	3.67315055346719e-16	1.04358169514687e-14
ABHD2	4618.57556507878	-0.248599770154209	0.128064003838348	-1.94121503859906	0.0522321997639918	0.090820374110108
ABHD3	344.216884399744	-0.198038739925557	0.0849122740982234	-2.332274597857	0.0196862499747646	0.0381776131351405
ABHD4	1791.52957041908	-0.088989728290376	0.0664965475489703	-1.33826088075988	0.180811409219494	0.266506418035842
ABHD5	717.754486438561	-0.0368361260436764	0.051309385003426	-0.717921800099861	0.472805505331632	0.595898816536051
ABHD6	977.40673197762	0.367034318377332	0.0859156977089793	4.2720286066998	1.93702719566571e-05	7.3822174508261e-05
ABHD8	623.633163760085	0.157963704144773	0.102855404278551	1.53578419386675	0.12459131757529	0.193828606285313
ABI1	2304.17713927621	0.396224372200945	0.0776769496933053	5.10092599883714	3.37995706341874e-07	1.8324162215864e-06
ABI2	4439.71425760554	0.208891221311902	0.0608703064892072	3.43174255823634	0.000599716562175538	0.00165770469391593
ABI3	428.640265642006	-0.831980202266186	0.134135649750749	-6.20252858812829	5.55630873357846e-10	5.12505713286532e-09
ABI3BP	804.060739330792	-0.371699271314769	0.193377285071393	-1.92214546386636	0.0545874567727208	0.0943265832520905
ABL1	3206.39259386938	0.257015709846326	0.056432199874781	4.55441592595408	5.25313286110674e-06	2.23301111151517e-05
ABL2	1020.31603603129	0.310714448046636	0.052782411759813	5.88670425786047	3.93972773978908e-09	3.12286589352907e-08
ABLIM1	6130.42424297194	0.171087542182196	0.0936945330166272	1.82601414056714	0.0678481318772353	0.114065392071709
ABLIM2	239.594044380925	0.40249870392336	0.146914362351359	2.73968247543251	0.0061498565945869	0.0135420523136932
ABLIM3	1465.82876161259	0.395179065482251	0.137999948535942	2.86361748446107	0.00418833460963793	0.00958929664546522
ABO	3.2740387450075	0.203607122742287	0.239417941265162	0.850425501390419	0.395088563116364	0.514208754266306
ABP1	0.872399855231772	-0.714287389384332	0.435905893002987	-1.63862751307067	0.101290858755722	0.161829562845235
ABR	7013.41019681585	0.0667556775241948	0.0771501566042871	0.865269501222053	0.386890886400816	0.505030674653819
ABRA	0.299359767341934	0.0375140661615373	0.634068718471969	0.0591640386422812	0.952821452451492	0.997580121386579
ABT1	411.987659833205	-0.0327659230520816	0.0459040626144314	-0.713791354967798	0.475356206175914	0.598443674969941
ABTB1	440.808457976498	-0.0797621141851359	0.10552978606876	-0.755825602955033	0.449753764076657	0.571800447609527
ABTB2	255.259084911392	0.101856147515014	0.128127380259117	0.794960041398077	0.426636746359928	0.548275760685414
ACAA1	1714.20720372528	-0.088992439576166	0.0681411754019024	-1.30600094658305	0.191552235669228	0.279924858187645
ACAA2	703.690586183485	-0.994102365870836	0.11068064652333	-8.98171809704141	2.66571091621445e-19	1.47598595900624e-17
ACACA	2265.38726486648	0.176368711795411	0.0632057258425047	2.79039136794164	0.00526443631240085	0.0117881277261825
ACACB	420.838041553141	-0.654933421402727	0.143531546666078	-4.56299285150469	5.04295323900124e-06	2.15211645780894e-05
ACAD10	473.368349456786	-0.135283936951066	0.0523979119832756	-2.58185740291037	0.00982701796845009	0.0205524820479764
ACAD11	737.661350156046	0.133947394513441	0.0855695355835924	1.56536311199899	0.11749779260408	0.183908767897006
ACAD8	960.990478537603	0.228137379233905	0.0439037360108725	5.19630901519197	2.03284239758265e-07	1.15275235172784e-06
ACAD9	768.566053474527	-0.130778470105376	0.0391905120550701	-3.33699314572894	0.000846900367411582	0.00225894185860842
ACADL	29.278177929799	-1.17180384390181	0.23536619529217	-4.97864122945609	6.40322111378965e-07	3.29197519144712e-06
ACADM	1221.33439278064	-0.222362757400125	0.0516597090999558	-4.30437494276009	1.67457851920863e-05	6.46159876051797e-05
ACADS	268.007257634361	-0.574017830836068	0.123508268996891	-4.64760647605317	3.35808767113866e-06	1.48849508097549e-05
ACADSB	664.483029480302	0.352620840554894	0.080633245321023	4.37314459006349	1.22469551992699e-05	4.85642231604822e-05
ACADVL	4148.45464366516	-0.151852755112995	0.0718799591292806	-2.11258822281574	0.034636027613259	0.063089362446955
ACAN	139.302928582153	-1.67776283212478	0.295456060112804	-5.67855278204217	1.35839118507687e-08	9.63429555936976e-08
ACAP1	25.4173401050641	-1.78740858387226	0.196827100780595	-9.08111015598764	1.07472986466268e-19	6.32824322123132e-18
ACAP2	1076.02303344689	0.0496078349926251	0.0673323322556603	0.736760978429569	0.461267717011191	0.583470132693933
ACAP3	3173.69090131055	0.776347633803594	0.111677272853146	6.95170659140716	3.6089340862702e-12	5.00627226629225e-11
ACAT1	1577.16559697321	0.10926850083428	0.0615050545376875	1.77657757814563	0.0756377674405292	0.125440783476507
ACAT2	670.949481782129	-0.0569636955589123	0.0927971408406878	-0.613851838999074	0.539313237887227	0.663251830289125
ACBD3	878.231541292926	-0.122985079225655	0.0495642847632643	-2.48132460325157	0.0130895112093886	0.0264861475779676
ACBD4	338.154579620057	0.124539016387565	0.0929106075508793	1.34041763013298	0.180109607138821	0.265693024760492
ACBD5	2112.48701383753	0.386807639032671	0.0740834551815042	5.22124188302224	1.77727219796299e-07	1.02089699788678e-06
ACBD6	480.692294404133	0.159804376432494	0.0465582885590808	3.43235074523215	0.000598373141509363	0.00165516499120316
ACBD7	905.39226614479	0.19427346779916	0.211466227808972	0.918697372209508	0.358253884685576	0.473717883122446
ACCN1	76.0639681638986	0.74603921376878	0.27961354708756	2.66810825705509	0.0076279675323546	0.0163746318016012
ACCN2	2402.39480921789	1.04775110239742	0.106251365449561	9.86106011875021	6.13976748724957e-23	7.12286120991036e-21
ACCN3	153.281460503139	0.734202169709181	0.158589129262944	4.62958699074422	3.66395780756712e-06	1.61124859362552e-05
ACCN4	1344.88078230918	1.62991747235135	0.188280958289568	8.65683650199298	4.8503765018237e-18	2.08683969140274e-16
ACCN5	0	NA	NA	NA	NA	NA
ACCS	104.516956934276	-1.00170213945162	0.167205396900764	-5.99084813061463	2.08749508455497e-09	1.7316759835457e-08
ACCSL	0.0249876789251004	0.160355064954317	2.90030575372639	0.0552890207345513	0.955908208972493	0.997580121386579
ACD	543.076843762817	0.208124442966231	0.0637348906700645	3.26547109092296	0.00109282159920366	0.00284937698574974
ACE	221.878872193097	-1.26003220875106	0.186627451473316	-6.75159093050803	1.46232691241822e-11	1.82743713681294e-10
ACE2	3.49238947640469	-0.537365011280831	0.2304539618622	-2.331767295032	0.0197129364251626	0.038221759940949
ACER1	0.0695499571099083	0.0178799934950626	1.28378225660729	0.0139275904484884	0.988887749868054	0.997580121386579
ACER2	22.4880229278292	-0.22837464831414	0.130035584976719	-1.75624732533812	0.0790461871228549	0.130394429710067
ACER3	588.656736516075	0.00405897544113758	0.0724110637746936	0.0560546307366379	0.955298286502115	0.997580121386579
ACHE	365.366438207778	-0.171835987972022	0.150557664613349	-1.1413300572463	0.253732598603721	0.355901284403493
ACIN1	2959.83711849505	0.218600150453032	0.0485245375572231	4.50494041690238	6.63915682395282e-06	2.77319259534592e-05
ACLY	3707.02340341652	-0.074461400991593	0.0645386808800539	-1.15374841840943	0.248603327067097	0.34973862022071
ACMSD	0.756655919006708	-2.70079616147424	0.626347741490884	-4.31197557293906	1.61802312893243e-05	6.26196798707171e-05
ACN9	209.89911714818	-0.385580891117611	0.0937118979312794	-4.1145350764357	3.87960563979148e-05	0.000139328108763441
ACO1	1036.60703927577	0.0734842489632141	0.0519055201644515	1.4157309035801	0.156854306662373	0.236360788375572
ACO2	5998.02354776502	0.094525991882623	0.0743556942315385	1.27126769320821	0.20363343152191	0.294925732359518
ACOT1	363.630926483021	-0.272894027130091	0.105755891190254	-2.58041442475443	0.00986818106978803	0.0206297167274663
ACOT11	85.0571389727632	-0.944050306061546	0.170079796889566	-5.55063166423303	2.84639241673146e-08	1.8979195416386e-07
ACOT12	1.62979858289022	-3.08651675253517	0.649950190722194	-4.7488512144378	2.04575371876775e-06	9.48423881512451e-06
ACOT13	684.455371704113	-0.274767075161813	0.0520820396430855	-5.27565888442104	1.32279944995419e-07	7.77249360253455e-07
ACOT2	214.782677873188	-0.113459432673414	0.101142066230939	-1.1217828239177	0.261954790940572	0.365435464564581
ACOT4	19.9157740247783	-0.516773679225383	0.176057998436637	-2.93524681533494	0.00333282471967451	0.00779325180401394
ACOT6	2.81610825383303	-0.835485663696349	0.222196015972558	-3.7601289115802	0.000169825821154718	0.00052992399204378
ACOT7	942.768087937761	0.411993398674478	0.108753452516909	3.78832477626787	0.000151666503519387	0.000478236556154806
ACOT8	512.891733734948	0.0163679970169427	0.0537761791834754	0.304372628652135	0.760844018331908	0.867793183361943
ACOT9	331.545461726541	-0.424606358153496	0.0887408075344116	-4.78479258810941	1.71163992329631e-06	8.09116228596776e-06
ACOX1	2166.59926107542	0.0812270172137435	0.0546930181374232	1.48514417342356	0.137505636692053	0.210839812692009
ACOX2	164.065353109117	-0.307639179194224	0.135033806698338	-2.27823821838542	0.0227123883694761	0.0433474783902359
ACOX3	427.359436416273	0.0993388409510233	0.0494254101595482	2.00987388127588	0.0444445387618103	0.0786975615942293
ACOXL	1.26901968685859	0.716322106689279	0.229586574461871	3.12005224333466	0.00180818967121754	0.00448366624580532
ACP1	1133.85713638505	-0.153535463482668	0.0392595835408642	-3.9107766724743	9.19998086389996e-05	0.000304220609157466
ACP2	1071.942402155	-0.2025631411053	0.0534224928115535	-3.79172012470171	0.000149607459832245	0.000472355320286805
ACP5	75.121807592637	-0.940036306420034	0.238494290382016	-3.94154637796275	8.09579769913645e-05	0.000271205048394928
ACP6	198.280490719448	-0.28259650711733	0.0886114902435185	-3.18916323764231	0.00142685280344607	0.00361019877179852
ACPL2	1203.98393678918	-0.427422491615789	0.114958681223794	-3.71805319150897	0.000200764003488787	0.000616997249388384
ACPP	14.1493547672757	-1.53385039652791	0.22102911364009	-6.93958533908583	3.93252506870862e-12	5.4089564988801e-11
ACPT	0.0954443191320454	-0.0677887307686678	1.13477784359878	-0.0597374465416825	0.952364746949185	0.997580121386579
ACR	2.98151151716957	0.330977340459862	0.167954389224196	1.97063823094289	0.0487652704275186	0.0854945965798053
ACRBP	26.1061047738255	-0.561531064809643	0.127217095788152	-4.41395915643863	1.01497115729063e-05	4.08040178539488e-05
ACRC	49.3213338956488	0.384173252308256	0.109231962412409	3.51704065205565	0.000436386942198664	0.00124399319927628
ACRV1	7.27596053804254	0.246745980741789	0.255732429251398	0.964859957198569	0.334614960099866	0.447270116751004
ACSBG1	1153.90005028583	-0.143295232178348	0.152031899120786	-0.942533987979083	0.345919318500274	0.46006413872781
ACSBG2	3.31202167221132	0.177063106520393	0.255773545811665	0.692265128352134	0.488770845032	0.612403294366902
ACSF2	387.952796785125	-0.4662806057376	0.112387498264301	-4.14886542488072	3.34127151578398e-05	0.000121767729698261
ACSF3	406.884235236015	0.130206701886325	0.0541160694716451	2.40606354374181	0.0161254596041274	0.0319492942649632
ACSL1	1081.45168894477	-0.672835653951511	0.13351345045021	-5.03945970748786	4.66847898176158e-07	2.4638141173716e-06
ACSL3	2567.36694664434	-0.17002985478838	0.096539263525132	-1.7612507966162	0.0781959639194978	0.129232539370051
ACSL4	952.169676182913	0.153628438982951	0.0763501766242019	2.01215564620257	0.044203532327647	0.0783277429826203
ACSL5	226.34375160898	-0.328122676225173	0.0952323196030261	-3.44549704966702	0.000570010189529784	0.0015845811715783
ACSL6	557.854299172851	0.572627712290009	0.14776626311064	3.87522632186518	0.000106525644911477	0.000347246164797573
ACSM1	0.805971455796605	0.182586697534045	0.357179927574424	0.511189693032233	0.609218235180166	0.73095687045441
ACSM2A	0.171115274992911	0.437004297991998	1.35784562749524	0.321836510088501	0.747576553567626	0.856822524494739
ACSM2B	0.0782365573157497	-0.245379476731207	2.90030575372639	-0.0846046925969572	0.932575668294377	0.996403677026426
ACSM3	1.98159422511259	-1.18826396069365	0.218402734584074	-5.44070092783676	5.30713445636742e-08	3.38690407840868e-07
ACSM4	0.00492739118930054	0.041370907829512	2.90030575372639	0.0142643263650246	0.988619100171593	0.997580121386579
ACSM5	296.756341936103	0.207810219425858	0.16853701699297	1.23302419334102	0.217566738015128	0.312090654590037
ACSS1	1720.91027530807	0.206625228943209	0.108088463949431	1.91163072721506	0.0559235752421868	0.0962938847486723
ACSS2	616.481787119946	-0.141325588994985	0.0509987859462321	-2.77115594759421	0.00558576676459214	0.0124121074269639
ACSS3	313.780657698724	-1.62687434265793	0.195321470748483	-8.32921407167196	8.13807946386989e-17	2.77292253060881e-15
ACTA1	7.57997191568469	0.244578524925263	0.182406946667496	1.34083997015255	0.179972415799807	0.265591154988888
ACTA2	726.151000833327	-0.448649519477257	0.172931266481113	-2.59438058025358	0.00947615269279862	0.0199019629291644
ACTB	85920.0331865164	-0.433725319722649	0.0576245177554938	-7.52674966518568	5.20189647260035e-14	1.01182597056867e-12
ACTBL2	0	NA	NA	NA	NA	NA
ACTC1	49.5464728343125	0.317810016883485	0.329461127290776	0.964635857033875	0.334727232998301	0.447358826793999
ACTG1	47661.6564346723	-0.191693080262062	0.0552691349940069	-3.46835680136569	0.000523651523216676	0.00146658545588346
ACTG2	27.3055081849428	-1.18736448044312	0.29829132075458	-3.98055323044422	6.87550658678828e-05	0.000233605927152812
ACTL6A	581.000699832196	-0.450946640235474	0.0661033690568608	-6.82184050025618	8.98814302681481e-12	1.16863847626832e-10
ACTL6B	260.946726036237	1.10472532105745	0.218248511710385	5.06177711087172	4.15366455704134e-07	2.21430312409014e-06
ACTL7A	0	NA	NA	NA	NA	NA
ACTL7B	0.0293751244136099	0.0143023706111339	2.90030575372639	0.00493133201310165	0.996065382269589	0.997580121386579
ACTL8	1.04663122704722	-0.0292813661029707	0.380350262952685	-0.0769852658327551	0.938635266340768	0.997580121386579
ACTL9	0	NA	NA	NA	NA	NA
ACTN1	2646.6841417788	-1.37177762485285	0.173217156960962	-7.91940965271705	2.38640893389047e-15	5.79939028946698e-14
ACTN2	774.317926707491	0.416039464381997	0.112961643324516	3.68301533279576	0.000230491290106483	0.000699078002517173
ACTN3	0.647234466665845	-0.551496105262546	0.361824057675207	-1.52421071391996	0.127456082498806	0.197591397383211
ACTN4	4796.42144687105	-0.38912908541219	0.0691098799783095	-5.6305854609257	1.7959892147635e-08	1.23951238653472e-07
ACTR10	1013.39110765803	0.0592325080168151	0.0498393474037192	1.1884687722134	0.23464877576132	0.333209809806056
ACTR1A	3661.98523520626	0.158149314866714	0.0580774170647309	2.72307762396607	0.00646768593260203	0.0141650970700543
ACTR1B	1389.37721177343	0.115458443160247	0.0458277584535883	2.51939974932827	0.011755511051302	0.0240768085739677
ACTR2	4719.30158040631	-0.196222951528785	0.0512988833324059	-3.82509206403776	0.000130723226451735	0.000418448531815626
ACTR3	2482.46522673854	-0.385996623449477	0.0568837207327609	-6.78571335484339	1.1551430090243e-11	1.47437702985485e-10
ACTR3B	359.640778145099	0.39817288632282	0.0953319421626595	4.17669961704378	2.9576919071736e-05	0.000108929356142883
ACTR3C	6.63415337127163	-0.0171504830399606	0.178424614131341	-0.0961217325505097	0.923423891144868	0.990835258666234
ACTR5	192.727542074696	0.0710937387749225	0.0514308877484747	1.38231599506137	0.166874696848267	0.249069340321498
ACTR6	666.702113415649	0.171850925432938	0.0405115723530422	4.2420206240164	2.21516329902737e-05	8.34755079235177e-05
ACTR8	537.704411050654	0.107257909053338	0.0474318338999326	2.26130638928323	0.0237402908663017	0.0450589807801133
ACTRT1	0.0105610057533173	-0.0460822086388763	2.90030575372639	-0.0158887415851479	0.987323151783713	0.997580121386579
ACTRT2	0	NA	NA	NA	NA	NA
ACVR1	671.307975378335	-0.258777425273083	0.0688035113467268	-3.76110783022404	0.00016916248112563	0.000528023183398227
ACVR1B	1043.55674872331	0.215890515312304	0.0618437087777204	3.49090505047588	0.000481387299691007	0.00135797343623936
ACVR1C	75.1716006309914	0.461151039691441	0.232780483172934	1.98105542786785	0.0475850580276583	0.0836957658116651
ACVR2A	320.785177987404	0.334084341374655	0.0585851464282301	5.70254342171742	1.18032830698379e-08	8.46068359805593e-08
ACVR2B	633.35522387329	0.726781115823001	0.0904652996915366	8.03381095625767	9.44907509331685e-16	2.50288530422364e-14
ACVRL1	324.796867841859	-0.307701900036721	0.112912234809519	-2.72514223596592	0.00642737914318374	0.0140897170130665
ACY1	413.787770126767	-0.0474817174881686	0.0721053361820359	-0.658504904107194	0.510213746823254	0.63459259257085
ACY3	184.776040569868	0.165648990504553	0.221584912951606	0.747564390995929	0.454722950003665	0.576763653232554
ACYP1	95.4786761544602	0.152575664431561	0.107769704394405	1.41575654576522	0.156846796310249	0.236360788375572
ACYP2	547.770319038018	-0.117664972245817	0.0732303867797908	-1.60677797045705	0.108103082425933	0.171281121573972
ADA	105.426572234425	0.0460634257409826	0.133985206496932	0.343794863219003	0.731000563588075	0.842636847980832
ADAD1	0	NA	NA	NA	NA	NA
ADAD2	28.3311152053547	0.930135772583313	0.288808151697739	3.22060082832002	0.00127922185344364	0.00328009918742489
ADAL	239.392202072928	-0.052124545487021	0.0518471542061629	-1.00535017370009	0.314728263273674	0.4251492827283
ADAM10	1070.66497420492	-0.108676293366247	0.0922695673820477	-1.17781297181406	0.238871176069437	0.338465955768326
ADAM11	241.178268657762	1.07664286324262	0.200997815084488	5.35649038169921	8.48540150483964e-08	5.17784831964072e-07
ADAM12	146.928588323458	-2.36727407889342	0.229728038250825	-10.3046806864243	6.71141883252857e-25	1.1276340779826e-22
ADAM15	1279.44380035637	-0.138848314270277	0.0679687413020147	-2.04282603459308	0.0410696623699213	0.073341370678923
ADAM17	815.300046911452	-0.250025113724414	0.081108364808846	-3.08260577455441	0.00205196791517087	0.00502675398022629
ADAM18	0	NA	NA	NA	NA	NA
ADAM19	264.532422412069	-0.791645442450491	0.179052662834176	-4.42129946530673	9.81090907692662e-06	3.95725616534147e-05
ADAM2	0	NA	NA	NA	NA	NA
ADAM20	1.86076710916541	0.518047395731649	0.183653099380625	2.82079310111714	0.00479050886377925	0.0108427613233141
ADAM21	7.47573333037976	-0.219824776870682	0.118360449412486	-1.85724858229114	0.0632757959906925	0.107201431142089
ADAM21P1	1.35469683223999	-0.497547550700957	0.219736947217926	-2.2642871715493	0.0235564580774077	0.0447611746055061
ADAM22	501.880753512494	0.550567413575156	0.142004025502933	3.87712539574298	0.000105697889260572	0.000344720860389649
ADAM23	451.579638855194	-0.1616425200485	0.134531019879504	-1.20152601380171	0.229547221787535	0.326846533652765
ADAM28	302.866103751354	-0.395331328182681	0.134206366210033	-2.94569728207966	0.00322227587813625	0.00756379102310917
ADAM29	3.51764183061557	2.16760459072452	0.287194694982035	7.54750915876111	4.43661352813738e-14	8.76085082709194e-13
ADAM30	0.0365100868978922	0.161247565641924	2.90030575372639	0.0555967471480375	0.955663055898546	0.997580121386579
ADAM32	8.14431178142047	-0.356856739230462	0.205107216203307	-1.73985462742928	0.0818845474671789	0.134484691171763
ADAM33	113.452428557093	-1.87914866780435	0.236779648943956	-7.93627609545587	2.08341955666383e-15	5.15957397196672e-14
ADAM3A	0	NA	NA	NA	NA	NA
ADAM5P	0.0248278396287009	-0.132642824419657	2.90030575372639	-0.0457340831218343	0.96352219781816	0.997580121386579
ADAM6	247.459536118397	-3.1990915471799	0.31809948432086	-10.0568900764173	8.56616341388976e-24	1.20111169019217e-21
ADAM7	0	NA	NA	NA	NA	NA
ADAM8	68.0438142673586	0.254104945746044	0.173258704828575	1.46662152413905	0.142479041449147	0.217490328778498
ADAM9	2560.47513465963	-0.515776869572111	0.0992676818571812	-5.19581861812964	2.03820916137284e-07	1.15545946931811e-06
ADAMDEC1	15.9974382601009	-2.36124609082607	0.468864356933955	-5.03609638034114	4.75121397815691e-07	2.50612071540672e-06
ADAMTS1	393.927653784295	-0.648282121233415	0.153148077238229	-4.23304120380814	2.30552244778947e-05	8.65625746627179e-05
ADAMTS10	384.23254989819	0.33420525930525	0.0951620311654527	3.51196012960449	0.00044481472510819	0.00126653601057102
ADAMTS12	35.4285123476647	0.0732317544991803	0.181837837777075	0.402731111381556	0.687146044100948	0.803442947312511
ADAMTS13	254.236304452119	0.501766569513084	0.107696982043493	4.65905877762152	3.17658497262516e-06	1.414799842698e-05
ADAMTS14	96.4072818103862	-1.79712481383234	0.243312729481873	-7.38606984377376	1.51232374289198e-13	2.66743798633165e-12
ADAMTS15	101.665361524887	-0.705392401602372	0.255356235432328	-2.76238565472316	0.00573806567754788	0.0127142905929295
ADAMTS16	23.2686690871855	-0.463647254598453	0.276978101736189	-1.67394913782772	0.0941405958291156	0.151786913692047
ADAMTS17	72.0360211631562	0.383125816916756	0.148385081682325	2.58196991620077	0.00982381479849884	0.0205479878109833
ADAMTS18	26.854143754298	-1.5570839412345	0.384873805918862	-4.04569996006111	5.21670143710388e-05	0.000182177944829161
ADAMTS19	28.0638429984407	1.75578770938444	0.240143742444539	7.31140312677496	2.6436708624062e-13	4.45719248341669e-12
ADAMTS2	27.2600615207974	-0.685383303174504	0.203610840670818	-3.36614347701937	0.000762270487235678	0.00205723945556374
ADAMTS20	42.2299118208662	2.39062423138047	0.368490060849147	6.48762201583275	8.72017137346033e-11	9.4788700540291e-10
ADAMTS3	67.6990684410187	-1.79702543323513	0.277926094634308	-6.46583918505255	1.00738167725335e-10	1.08354684821566e-09
ADAMTS4	502.601221425642	-0.400584972214153	0.197052686628439	-2.03288257099226	0.0420643882940103	0.074857097137533
ADAMTS5	136.224424246688	0.29502182842367	0.133077495630062	2.21691749628196	0.0266287299232803	0.0499416807356364
ADAMTS6	171.641669910374	0.368178639719591	0.137017697229588	2.68708821680653	0.00720779137710633	0.0155854588187397
ADAMTS7	97.4373342625703	-0.837940302139517	0.212368508569461	-3.94569000735553	7.95705038887994e-05	0.000266970067273661
ADAMTS8	164.41594153297	0.184253373762612	0.172274075220977	1.06953628122089	0.284828089533285	0.391874873994333
ADAMTS9	507.198055220616	-0.383307553311976	0.151228802480072	-2.53462003947618	0.0112569351568807	0.0231554265126759
ADAMTSL1	109.099223695833	-1.32331031683008	0.219282995187422	-6.03471471054579	1.59243768360552e-09	1.35059227386735e-08
ADAMTSL2	498.351179270991	0.174688652786424	0.0984855180058588	1.77374964688749	0.0761045703614417	0.126150542298393
ADAMTSL3	116.585985995244	-0.109457383813426	0.228299499394994	-0.479446446897578	0.631621057577774	0.752222755374828
ADAMTSL4	102.263197302499	-1.64602120328835	0.165179579725748	-9.96504050937336	2.16785471149684e-23	2.83567035752171e-21
ADAMTSL5	7.11327151484105	-0.151179142619503	0.226742167599532	-0.666744718108688	0.504935209636301	0.629151466296606
ADAP1	706.569316293069	0.256904234405741	0.160442635999286	1.60122172517089	0.109327818641412	0.172921678045424
ADAP2	378.673380725562	-0.686383274480829	0.111811273902507	-6.13876624891435	8.31648338813712e-10	7.43183224368604e-09
ADAR	6955.25521589308	-0.173508594588466	0.0533285147155785	-3.25358010651252	0.00113960589393447	0.0029590885788413
ADARB1	406.86382252015	0.201551807804363	0.109119835570102	1.84706847065288	0.0647372173797898	0.109401575195708
ADARB2	181.723359696586	0.139579220524933	0.219614971094498	0.635563321704847	0.525061082244935	0.649124040149305
ADAT1	208.304386921284	-0.281966053801253	0.0940731832982154	-2.99730533097206	0.00272377756631954	0.00649295801951662
ADAT2	107.706395268366	0.0999682139398479	0.0965616022664867	1.03527915437815	0.300538562045663	0.409901789661999
ADAT3	35.9552285821193	-0.138347921789569	0.155505298381367	-0.889666932442907	0.373644754805471	0.490095987021915
ADC	574.259588088762	-0.0509896289152724	0.0822343173133008	-0.620052924146124	0.535222943949553	0.659094912338207
ADCK1	303.199560276342	0.292992226077599	0.0633699191527605	4.62352216942722	3.77278398608521e-06	1.65499797183886e-05
ADCK2	793.311060710722	-0.239315743363335	0.0662787906718473	-3.61074396405647	0.000305319955148606	0.0009025318778221
ADCK4	904.681417136514	-0.194916581508661	0.0658248003145308	-2.96114200996114	0.00306500579752696	0.00723382937682253
ADCK5	116.9169025376	0.281220290580662	0.0982445480171844	2.86245187398564	0.00420377096568702	0.00962201950924721
ADCY1	1055.66065194094	0.326830809982844	0.19997146170368	1.63438726305429	0.102177560968209	0.163025882191314
ADCY10	1.4678588365015	-0.51476498417561	0.239345439886634	-2.15071983163509	0.0314983200824419	0.0580162534708944
ADCY2	3986.2318867286	0.284072895570114	0.142834847498983	1.9888206592732	0.0467210016214145	0.0822725263463471
ADCY3	921.861767606949	-0.136077849607747	0.0646729063162106	-2.10409362063319	0.0353702812239681	0.0642886114944641
ADCY4	83.0017196866649	-0.0490474893045166	0.135582812404764	-0.361753001243935	0.71753661628706	0.831100375888624
ADCY5	389.051423218712	0.485480696995799	0.118584829669712	4.09395281291868	4.24080653610862e-05	0.000151130589483922
ADCY6	971.939842879579	0.212083980688819	0.0675478502647398	3.13975914640659	0.00169086789149888	0.00421743219929782
ADCY7	888.854953641964	-0.0892154733470812	0.0862014916841176	-1.03496437943334	0.300685546677215	0.409987498582546
ADCY8	1458.63112516575	0.370372203561241	0.16214761338512	2.28416685160554	0.0223617269009268	0.0427410078747734
ADCY9	587.938074338075	-0.0549021394805087	0.0740248476909894	-0.741671765535988	0.458286230500996	0.580603135235596
ADCYAP1	23.8740808882661	0.224663078749232	0.270031406925259	0.831988698305065	0.405415323779867	0.525263887553654
ADCYAP1R1	1909.16316645976	0.436205352655117	0.196679830878968	2.21784486342958	0.0265654119842201	0.0498436514558324
ADD1	9791.16659418948	0.216262245721112	0.0404234627603172	5.34991885785232	8.79936761502768e-08	5.36439395736283e-07
ADD2	961.296312128243	0.393816401730845	0.107512859805372	3.6629702013672	0.000249307550382768	0.000749846320518541
ADD3	6137.87221633902	0.151792167613754	0.111323689003416	1.36352081908727	0.172718427689359	0.256576383815977
ADH1A	0.086108849471294	-0.0100816464536033	1.36174124167172	-0.00740349645372183	0.994092918446588	0.997580121386579
ADH1B	20.4757337245368	0.392710705355793	0.250184811719998	1.56968243857788	0.116489008790693	0.182522552672985
ADH1C	0.26283407731964	-0.844165485921959	0.781992256448833	-1.07950619582279	0.280362133270323	0.386803332937032
ADH4	0.580387856534769	-2.41866475228127	0.749474384666243	-3.22714798766385	0.00125030776771997	0.00321187536481644
ADH5	2446.43580185968	-0.18719505994771	0.0471473688492566	-3.97042432094621	7.17447429137996e-05	0.000242719152818947
ADH6	0.135454352771884	-0.122818719305673	0.850194789531576	-0.144459506007254	0.885137630515498	0.964725291818886
ADH7	0.350140958210716	-1.05096672634218	0.655814200754547	-1.6025373118377	0.109036843527602	0.172536176045544
ADHFE1	503.694247033457	0.536617999094089	0.130086109801848	4.12509836685473	3.70576338854527e-05	0.000133676343591981
ADI1	1339.52374334273	-0.0618117171641543	0.0745035488878573	-0.829647957538147	0.406737853657092	0.526452435102718
ADIG	3.44450869006273	-2.46645639324602	0.324535463681118	-7.59995953992107	2.96223349361036e-14	6.09007708760188e-13
ADIPOQ	0.317167674719688	-0.751357084722633	0.781824942949447	-0.961029820675874	0.336537174051421	0.449315626953157
ADIPOR1	1761.09356425076	-0.362276571540663	0.0583048556474142	-6.21348886843064	5.18209050100591e-10	4.79804958976747e-09
ADIPOR2	3324.01007591982	0.237890979133244	0.0927271661036222	2.5654939014032	0.0103029032519451	0.0214144805780537
ADK	414.935818765682	0.117625965587038	0.076441122368495	1.5387786304341	0.123858348541582	0.192780643114154
ADM	147.822590409899	-1.28790061693738	0.220992211411697	-5.82780998800945	5.61594680886978e-09	4.29571441541884e-08
ADM2	13.332773010272	-0.844309993423368	0.254528811334821	-3.31714900562953	0.000909411015926615	0.0024082093342948
ADNP	2299.46142432932	0.0219136345656218	0.0583994915404103	0.375236735587987	0.707484411802436	0.822416034843187
ADNP2	645.405559363896	0.116309330308676	0.0718225860909961	1.61939769421999	0.105361722642498	0.167441289489749
ADO	1041.32018812444	0.270108496467063	0.0568778076260731	4.74892594740665	2.04499800009702e-06	9.48423881512451e-06
ADORA1	1406.55971690315	-0.782163309865581	0.157534392670892	-4.96503205810819	6.86897225289076e-07	3.51289082153873e-06
ADORA2A	117.644830881053	0.237846961782503	0.101940471174061	2.33319464824119	0.0196379316043984	0.0381028658008685
ADORA2B	72.2836015641261	-0.308903434544678	0.163658462106762	-1.88748831296707	0.0590946768094106	0.101057756516225
ADORA3	1103.5430810251	-0.639156462006076	0.130905660906311	-4.88257312618068	1.0471038815185e-06	5.16006438705323e-06
ADPGK	674.251141615496	-0.38138786136149	0.0534867054001623	-7.13051698563457	9.99926346809693e-13	1.52971463887919e-11
ADPRH	165.68167650594	-0.967669616571508	0.105318063508653	-9.18806883011103	3.99956948104502e-20	2.55579046510057e-18
ADPRHL1	48.3934146359317	0.241603076779865	0.122200647880059	1.97710143907748	0.0480301651569501	0.0843416450949597
ADPRHL2	812.265598608774	-0.238784714797601	0.0608281592358306	-3.92556207186599	8.65274528329099e-05	0.000287981566890952
ADRA1A	51.9292071090918	0.00113936815568201	0.19617569339291	0.00580789666638275	0.995365994971286	0.997580121386579
ADRA1B	76.03809896117	0.676570217749239	0.213064765019954	3.17542047689526	0.00149619524906364	0.00377047393383118
ADRA1D	44.9243415099741	-1.07306707465114	0.216077754482247	-4.96611544868358	6.83073005165723e-07	3.4951674640798e-06
ADRA2A	132.176568062219	-0.150106233017464	0.222333255758228	-0.675140713905138	0.499586368809232	0.623802827092827
ADRA2B	21.604917184829	-0.849938461213927	0.20259107597252	-4.19534008165895	2.72462467670551e-05	0.000101071440709917
ADRA2C	41.6640522618209	0.10516204195473	0.177827224094419	0.591372004428823	0.55427119399869	0.677542998685052
ADRB1	76.9509234508173	0.381459495618497	0.16805941875161	2.26978944977961	0.0232203610039802	0.044213055487258
ADRB2	116.380464004896	-0.174374299546971	0.13280867125244	-1.31297375316348	0.189191792594167	0.277077550169847
ADRB3	0.699055041645866	1.56589619728974	0.584685038908826	2.67818755925774	0.00740217555846724	0.0159485893376584
ADRBK1	1954.9300022095	0.143668906611476	0.0558684331078116	2.57155783005821	0.0101242105067555	0.0210857942697868
ADRBK2	699.355602879597	0.470511275310665	0.0927674471420843	5.07194376697702	3.93772758748754e-07	2.1078360527364e-06
ADRM1	1568.2586079973	-0.155682171521966	0.0530320009506865	-2.93562695600967	0.00332874366595682	0.00778744617086766
ADSL	646.47870823579	0.0255037583888235	0.0539693400583643	0.472560130645341	0.636527032550218	0.756707669563576
ADSS	703.53473567454	-0.330967233660471	0.0688909549399349	-4.8042189856279	1.55356725095168e-06	7.39595156840458e-06
ADSSL1	84.742179933665	-0.745665931879344	0.11970073695667	-6.22941805403641	4.68170960285396e-10	4.40166522718879e-09
AEBP1	5118.74948970595	-2.16636852025341	0.233874304580533	-9.26296082050961	1.98840345495312e-20	1.36939870448892e-18
AEBP2	525.797943444891	-0.159764997922466	0.0495016535853516	-3.22746789957222	0.0012489105316108	0.00320913200541785
AEN	420.443879346033	-0.675067426901755	0.135462311166127	-4.98343355498986	6.24657704977947e-07	3.21738336945565e-06
AES	6291.49166940591	0.0780543253063003	0.0860068899040131	0.90753572642159	0.364123565674281	0.480127751504752
AFAP1	1828.14709886072	0.542060257598725	0.0927836937498382	5.84219312350529	5.15180314665239e-09	3.96872108016819e-08
AFAP1L1	224.901567016194	-0.997061714104153	0.168009554856509	-5.93455363271278	2.94646005327047e-09	2.38185426952474e-08
AFAP1L2	809.80643085404	0.00290485449889358	0.15501363637027	0.0187393481432496	0.98504903847995	0.997580121386579
AFARP1	3.39556276306359	0.155565110204651	0.16657673090725	0.933894604350655	0.350358262379569	0.464933787279758
AFF1	1135.93576901186	-0.307491550694178	0.0765518638407864	-4.01677418767625	5.90002092349728e-05	0.000203416606755638
AFF2	251.971417647903	1.28134607851265	0.204339764239948	6.27066436764609	3.59510812977824e-10	3.46717408925473e-09
AFF3	561.120327873799	0.518405223440855	0.118080457055734	4.39027114534429	1.13209406947167e-05	4.5158643909134e-05
AFF4	2754.47987011349	0.203489562752343	0.064503871881532	3.15468756861716	0.00160670062308765	0.00402397778771245
AFG3L1	285.873204166408	0.143228459357951	0.0958403697434607	1.49444810930232	0.135058535106849	0.207649241843565
AFG3L2	1115.01174441751	-0.0365593494382141	0.0492037147230886	-0.743020108216724	0.457469506398722	0.579756855433454
AFM	0.00505570052865264	-0.0172286700452834	2.90030575372639	-0.00594029440625272	0.995260358681341	0.997580121386579
AFMID	310.452985264641	-0.219112126465198	0.109348852098177	-2.00378990964142	0.0450925701794146	0.0797146660133142
AFP	2.49500888656854	-4.14835544856721	0.618974273927641	-6.70198362565898	2.05609081789961e-11	2.48901925719648e-10
AFTPH	785.422767949258	-0.0123732519295169	0.0400021562941062	-0.30931462390541	0.757082207795611	0.86494513871184
AG2	860.757107783228	0.568530476800052	0.161016060706646	3.53089296996188	0.000414159297952465	0.00118722822725306
AGA	365.658488546249	-0.821242665405702	0.0816910908417008	-10.0530260637245	8.90888844207162e-24	1.24024454097126e-21
AGAP1	570.317887274959	-0.0340441461217456	0.105226491349464	-0.323532084793008	0.746292312796424	0.855702857771638
AGAP11	13.6283989126784	0.0883490972065321	0.179398728254792	0.492473375179416	0.622384739312441	0.743396995843019
AGAP2	2088.22131665816	0.54571569531584	0.195333398461842	2.79376542676825	0.00520982545695958	0.0116792613476124
AGAP3	2841.09219691327	0.469036109910574	0.0730690156401475	6.41908346241445	1.37097233860616e-10	1.44199950779461e-09
AGAP4	306.653152560567	0.613289366279926	0.114740116066911	5.34503003223638	9.04020633950374e-08	5.49574614962345e-07
AGAP5	39.7838664682097	0.455963020995342	0.0962644721493511	4.73656595018701	2.17370026023308e-06	1.00171692631003e-05
AGAP6	162.712208071679	0.542399995825954	0.107579016889074	5.0418753722692	4.60991498428563e-07	2.43554467453855e-06
AGAP7	16.8742299121177	0.453771803993297	0.177899150231712	2.5507249663771	0.0107499120884136	0.0222557665820248
AGAP8	50.3659571483656	0.597774436177882	0.155347857411812	3.84797348439278	0.000119098940119452	0.000384565663175633
AGBL1	0.314697005094098	0.39089986080335	0.608003029905388	0.642924198690553	0.520273286623923	0.64430844810651
AGBL2	15.3252564146224	-2.10054234092652	0.251712356754725	-8.34501082111495	7.1207364372864e-17	2.44767465895436e-15
AGBL3	15.2849031604879	-0.489556192705057	0.121352267877621	-4.03417423726069	5.47946492348004e-05	0.000190489713427444
AGBL4	31.0605315272523	-0.046247577156893	0.198383701776468	-0.233121858009299	0.815666782211715	0.912382092820611
AGBL5	566.757051181783	-0.0601421946070397	0.0498418530399694	-1.20666048589346	0.227562922403837	0.324425814634702
AGER	112.685109855713	0.413048574956867	0.147504872440479	2.80023682013312	0.0051065128270206	0.0114766991465212
AGFG1	1876.332434838	-0.00868813538177553	0.0450418753905348	-0.192890178449392	0.84704497705308	0.935719923072297
AGFG2	1172.01131901911	-0.281214690030271	0.10864779301388	-2.5883147943405	0.00964467959355033	0.0202210418758924
AGGF1	1113.59210061224	-0.134276908099465	0.0434968519164571	-3.08704888246548	0.00202154350600042	0.00495845493732043
AGK	716.60984633337	-0.0914518600789662	0.0533731657479944	-1.71344267849435	0.0866311303554435	0.141114979576063
AGL	635.041168368094	-0.232056312312742	0.0695025830106499	-3.33881565635026	0.000841363784832501	0.00224694165064202
AGMAT	26.4486387180795	-0.24328169378178	0.132220785401093	-1.83996557760402	0.0657732911551133	0.1109911977779
AGPAT1	2955.18006613326	0.128192494302096	0.0396631670920938	3.23202869817345	0.00122914711063897	0.00316544360284799
AGPAT2	247.677887494519	-0.43995964544942	0.104596709204789	-4.20624748899152	2.59645890118118e-05	9.66297192744343e-05
AGPAT3	3481.73715117186	-0.0634569596668384	0.0657290199218985	-0.965432920530995	0.334328019121424	0.447009198921352
AGPAT4	1048.08929126934	0.173116115318117	0.0759487325275124	2.27938122937608	0.0226444131461344	0.0432346798803056
AGPAT5	2674.6566392826	0.0483563590254228	0.0602817701664574	0.802172180609416	0.42245336627205	0.5436165395908
AGPAT6	2036.95813691706	0.0108009199158371	0.0478937389106565	0.225518411414605	0.821576004007369	0.916677142094322
AGPAT9	11.6686636155082	-1.01995154627989	0.217981616281384	-4.67907139913704	2.8817708597733e-06	1.29533473378648e-05
AGPHD1	17.09320342534	-0.610833980020337	0.115462309025086	-5.29033227533691	1.22094342845785e-07	7.21752727347389e-07
AGPS	962.047207862699	-0.058584337843243	0.0460817005765733	-1.27131458063042	0.20361675724001	0.294923498707477
AGR2	0.440824632910353	0.0211535242926521	0.831568278718401	0.0254381087326389	0.979705514561183	0.997580121386579
AGR3	3.75438489571589	-5.3291229643502	0.886582522287362	-6.01085948615498	1.84542307410241e-09	1.54498692930653e-08
AGRN	4711.15069460053	0.125217842324911	0.0857028212787923	1.46107024782272	0.14399616416986	0.219531073190752
AGRP	0.427412979507392	-0.362271097545473	0.393984033546415	-0.919507052822723	0.357830418328888	0.473302670731593
AGT	15351.0207349346	-0.213058328923341	0.129169472388908	-1.64944800797713	0.0990558863357208	0.158666679650371
AGTPBP1	562.871217173743	-0.0894557454360796	0.0826899804582996	-1.08182085592815	0.279332137484538	0.385647330139098
AGTR1	5.93586571328931	-2.0007438851626	0.274269095152558	-7.2948207454789	2.99056969458534e-13	5.00740578586497e-12
AGTR2	0.0452378819084646	0.0449445569945604	2.31597765951147	0.0194062998880745	0.984516984771899	0.997580121386579
AGTRAP	619.99786570502	-0.597107056651625	0.0836743937253538	-7.1360786743376	9.60310592497809e-13	1.47373649195136e-11
AGXT	0.154390860422101	-0.619581972972798	1.95657750393205	-0.31666620500729	0.751496894525543	0.860152365181045
AGXT2	0.029678216026887	-0.102896785138456	2.90030575372639	-0.0354779095294526	0.971698660926045	0.997580121386579
AGXT2L1	2933.61050816389	0.632568505222361	0.230165365304855	2.74832186147782	0.00599011750353978	0.0132126969379799
AGXT2L2	428.737202173237	-0.346977263674799	0.0723292225838223	-4.79719332352407	1.60904290267179e-06	7.64511120747763e-06
AHCTF1	1206.6493749235	0.154164804159878	0.0687363078225091	2.24284383382888	0.0249068867120716	0.0470337391743314
AHCY	2061.48060963466	-0.169503918050054	0.0477405771329566	-3.55052092432793	0.000384469572072741	0.00111012029032559
AHCYL1	17478.6025099886	0.275029657517178	0.133510068649554	2.05999188150442	0.0393993169465187	0.070714862076402
AHCYL2	3052.01856401909	0.119478687014232	0.111545913188548	1.07111666935099	0.284116973916234	0.391089753628604
AHDC1	1672.55535981047	0.117395626620234	0.0636965635724452	1.84304489969407	0.0653224551847822	0.110275846821256
AHI1	340.734503271438	0.10561911248224	0.0783131057631341	1.34867735678489	0.1774406215884	0.262252044798507
AHNAK	13558.338956808	0.215457052251	0.125891644484291	1.71144838987217	0.0869983708012437	0.141671621553706
AHNAK2	318.962705003799	-0.927082111817062	0.213440990035701	-4.34350548909089	1.40226972229486e-05	5.50142111702031e-05
AHR	480.674796712554	-1.15776178308084	0.158188281107267	-7.31888465426698	2.50040397552458e-13	4.23764117243253e-12
AHRR	57.1800111221675	0.16815530779858	0.134553595060573	1.24972735007846	0.21139916282421	0.304656143407561
AHSA1	1771.811760218	0.138146310045352	0.0501046560183001	2.75715514332432	0.00583066799759932	0.0129004108608481
AHSA2	629.713527470632	0.20176183256369	0.123108866885758	1.63888952654336	0.101236269349756	0.161768868543637
AHSG	2.54579805910769	0.460986465461275	0.260689919455852	1.76833253247195	0.077005328284916	0.127470175664431
AHSP	0.314726909448192	-0.19510175283856	0.574528631011528	-0.339585779206616	0.734168488929859	0.845182743605608
AICDA	0.0609526907458749	-0.158814954748465	2.04276695246769	-0.07774501861635	0.938030882776565	0.997580121386579
AIDA	943.794762307606	-0.305496915905275	0.0530230332477681	-5.76158882645844	8.33257907663534e-09	6.16794402596365e-08
AIF1	982.455188937466	-0.713869803457753	0.135285525141915	-5.27676410842108	1.31484962574628e-07	7.73744541237775e-07
AIF1L	3606.35890034277	-0.204458984932139	0.110184221530089	-1.85561037771914	0.063509113414819	0.107549971366307
AIFM1	578.852277027695	-0.0038638301613475	0.0480434856911396	-0.0804236017800034	0.935900356194778	0.997580121386579
AIFM2	206.874500081039	0.163565814276701	0.0873061293779908	1.87347458239209	0.0610028794380228	0.103810889744789
AIFM3	376.351051740964	-0.291990318827029	0.251537550810933	-1.16082198417564	0.245714300721846	0.346306106777124
AIG1	739.500266340132	-0.208086124174124	0.0678112003893675	-3.06860994908374	0.00215057175584503	0.00524326288734297
AIM1	109.115146232749	-1.83158965736502	0.222569183768066	-8.22930482269133	1.88303040889613e-16	5.7795689243127e-15
AIM1L	0.0756278821608644	-0.18677423009196	1.36357814773727	-0.136973616365072	0.891051649614235	0.968502319542749
AIM2	20.9140697665057	-0.585387278797849	0.182989949818605	-3.1990132757462	0.00137898818605697	0.0035050182246023
AIMP1	930.037241452369	-0.0475340502937811	0.0431096446073045	-1.10263145815234	0.270187243225061	0.375094335099112
AIMP2	510.402167141421	-0.134935796015062	0.0572138930717964	-2.35844457998574	0.0183516997761552	0.0358678929640258
AIP	1263.72734613819	0.260163987030874	0.074752776811207	3.48032538895424	0.000500805147384849	0.00140846931061049
AIPL1	0.379033916907516	-0.0725470598249866	0.571592941669467	-0.12692084617612	0.899003047208281	0.974449106839964
AIRE	8.18075179153747	0.538676291148537	0.273785897134339	1.96750927197767	0.0491245280458599	0.0859921907323343
AJAP1	110.562537815755	1.22787337968535	0.180193054187962	6.81421037685802	9.47829165890704e-12	1.22827064117087e-10
AK1	1828.48457336909	-0.478085730283824	0.123806327609259	-3.86156135567395	0.000112664710046534	0.000365546062727976
AK2	1453.64484926346	-0.317858681822983	0.055795712691982	-5.69682985461103	1.2205562507582e-08	8.72337415741744e-08
AK3	1773.73004773449	-0.171751224878535	0.0750144829985609	-2.28957419971594	0.0220460120395913	0.042203788886321
AK3L1	222.037886241608	-0.850521420217908	0.146293835973206	-5.81378849327379	6.1074573650116e-09	4.64058479460773e-08
AK5	812.276816429509	0.503271864071634	0.23331401210268	2.15705803323183	0.0310011429729844	0.0572224904388167
AK7	15.6277398171095	-2.61670889592123	0.313420907606829	-8.34886515995854	6.89219665149974e-17	2.37330234518958e-15
AKAP1	1445.237507946	0.266485210664825	0.0667090360648094	3.99473933944914	6.47654670743594e-05	0.000221025906720236
AKAP10	459.196368854042	0.0301207631751334	0.067218429489357	0.44810275104542	0.654079042707347	0.772442480098764
AKAP11	2556.86032257818	0.341314572606889	0.0804294514038594	4.24365163070739	2.19911658298014e-05	8.29510009720977e-05
AKAP12	1872.15559712085	-0.189157550805622	0.156053981961899	-1.21212895965581	0.225463019759354	0.32180697584107
AKAP13	2370.18371966331	0.0761048218364865	0.0579495518852318	1.31329439763764	0.189083765609638	0.27696096435682
AKAP14	2.08307421528962	-1.51343654951997	0.521948881274958	-2.89958768725227	0.00373653814642431	0.00864906513940735
AKAP2	308.374814778803	-0.620802306723531	0.168268160117966	-3.68936289722495	0.000224816343537431	0.0006842083909345
AKAP3	102.777593718097	-0.204850517407084	0.122466952809494	-1.67270037106046	0.0943862961669469	0.152099693198488
AKAP4	0.0103396393485194	0.0125173692359183	2.90030575372639	0.00431587918612914	0.996556437321534	0.997580121386579
AKAP5	140.200257347986	0.946470372666147	0.186395752666133	5.07774645681673	3.81937902995037e-07	2.05124544760906e-06
AKAP6	2542.63545934963	0.512892700409663	0.0953886585667181	5.37687297542745	7.57906037781448e-08	4.68919438025892e-07
AKAP7	531.128530009154	0.338128970343482	0.0829677657664479	4.07542576589692	4.59302330015686e-05	0.000162405704136533
AKAP8	609.346003633619	0.0190633797211411	0.0460984595045214	0.413536155568742	0.67921383841723	0.796167541393626
AKAP8L	1337.05945519384	0.212375445832048	0.0608353298770061	3.49098864527271	0.000481236705271219	0.00135774513400927
AKAP9	1268.08873878325	0.371803653528793	0.0764063091087552	4.8661381221749	1.13800001009392e-06	5.57416943873597e-06
AKD1	195.490623013743	-0.305141318642637	0.101464191959628	-3.0073793793583	0.0026351067645275	0.00630051912309147
AKIRIN1	1812.20779522586	-0.132303656376574	0.0495840371101556	-2.66827116321022	0.00762426963347072	0.0163693095328994
AKIRIN2	1094.48254415931	0.0729852881461463	0.0480208359445949	1.5198670891601	0.128544383397094	0.199025264729056
AKNA	923.376668646241	0.0728105589329603	0.0884864260657771	0.822844386085115	0.410596491979859	0.53095313353818
AKNAD1	21.1209863831986	-0.921669828133036	0.246436297249151	-3.73999219441774	0.000184025969510328	0.000570307862260502
AKR1A1	1564.66886359579	-0.0921541196699407	0.0587069480502347	-1.56973105791645	0.116477692533579	0.182522552672985
AKR1B1	2728.52527115488	-0.234598364487148	0.0564939628360872	-4.15262716067231	3.28680006176458e-05	0.000119894690630342
AKR1B10	3.66739489379018	-1.93412935016312	0.498092449916392	-3.88307301282679	0.000103144579726637	0.000337296620616135
AKR1B15	1.16822015772003	-1.77930989788338	0.527807707466886	-3.37113284385869	0.000748597500062657	0.00202444363483019
AKR1C1	523.118214196419	-0.576260284983063	0.242392260928365	-2.37738730921516	0.0174357697052351	0.0342460094280996
AKR1C2	59.8581440690293	0.271013213229575	0.203274124343649	1.33324009686254	0.182453024793839	0.268580774413287
AKR1C3	667.454692415491	0.25460071992056	0.179545040083303	1.41803259952173	0.156181247377007	0.235573492956734
AKR1C4	0.415249904271507	-1.45591626915518	0.966118059374594	-1.50697552439673	0.131816930984894	0.203381252762476
AKR1CL1	0	NA	NA	NA	NA	NA
AKR1D1	0.140017985372608	-0.503273631711844	1.13820537122957	-0.442164168640472	0.658370412680662	0.776263723118336
AKR1E2	4.36187972180426	-0.480504491310465	0.241968557442649	-1.98581376187422	0.0470540071101189	0.0828140327412152
AKR7A2	1049.78502167104	-0.107821523394102	0.067463805847226	-1.59821287933663	0.109995608373957	0.173799303381307
AKR7A3	28.8221636244478	-0.289047803935764	0.159077605052103	-1.81702385977644	0.0692134600250969	0.116145967358313
AKR7L	22.7869609899697	0.4384377696685	0.122094796734108	3.5909619524844	0.000329459733442025	0.000965589504478956
AKT1	3184.33030250762	0.0495421574816858	0.0473300385066813	1.04673816131995	0.295220358081415	0.404062133357218
AKT1S1	1125.93047296751	-0.0130335334272666	0.0648798986446529	-0.200887080583329	0.84078686999021	0.931510366474475
AKT2	2320.32772609821	-0.0147080010164482	0.0649921878288472	-0.226304137586209	0.820964880535412	0.916310017273805
AKT3	1353.21670020354	0.452885677065448	0.0892272852669139	5.075641108106	3.86191627749042e-07	2.07237742974362e-06
AKTIP	1187.58672693177	-0.0291911067447453	0.0553422191625457	-0.527465417658949	0.597870425530749	0.720490607407054
ALAD	2056.05475779969	-0.341260540907712	0.0850337293251678	-4.01323737787315	5.98916299540476e-05	0.000206052580371472
ALAS1	955.706367313844	-0.102857431888397	0.0476231897969825	-2.15981819627953	0.0307867464324673	0.0568860151657933
ALAS2	2.68335438663858	-0.666321195431132	0.428213473912302	-1.55604911107396	0.119696414598122	0.186944716765557
ALB	12.0900938616554	0.261720204541082	0.183458021836322	1.42659449786602	0.15369681108067	0.232375366376716
ALCAM	4351.13275079083	0.51806732660657	0.0965910941352587	5.36351028264686	8.1620003057294e-08	5.01504999869691e-07
ALDH16A1	401.81730028633	-0.319477359238516	0.0890447905798113	-3.58782762201194	0.00033344461228006	0.000976094246521233
ALDH18A1	1194.87477899012	0.129845106391002	0.0782661171543846	1.65902067346556	0.0971116265288363	0.155983649336329
ALDH1A1	918.542011948897	-0.509744108736934	0.180032047117955	-2.8314076126844	0.00463436196974347	0.0105241299688344
ALDH1A2	66.8110495536535	-0.310129846237033	0.193721727516385	-1.60090378200247	0.109398231812475	0.172995662314412
ALDH1A3	98.4307942383712	-2.30955339331382	0.367352871825999	-6.28701602857693	3.23625974787497e-10	3.13648445977539e-09
ALDH1B1	484.826102029807	0.0541291225128329	0.0702440980363416	0.770586056707976	0.440952328441224	0.562960885714624
ALDH1L1	2720.26061160844	-0.641756391417938	0.174737760449994	-3.67268293793656	0.000240017211087892	0.000725598796975804
ALDH1L2	378.719884852633	0.474291341957152	0.11949867071445	3.96900935484464	7.21720488027386e-05	0.000244080033171157
ALDH2	7426.59126380629	0.48199996207142	0.110970435572294	4.34349887504417	1.40231196045956e-05	5.50142111702031e-05
ALDH3A1	17.0957285449082	-3.66124397666016	0.268601360315098	-13.6307722803977	2.62784612197366e-42	6.40209011465834e-39
ALDH3A2	2398.73948132601	-0.339193408766781	0.0631521652023209	-5.37104955435977	7.82796924841491e-08	4.83113111626367e-07
ALDH3B1	267.952980799176	-0.778553969915648	0.105461800941199	-7.38233145051006	1.55541380259671e-13	2.7335450867998e-12
ALDH3B2	0.418772539990259	-0.721942794190381	0.435349852070246	-1.65830490295858	0.0972559399047767	0.156176836841402
ALDH4A1	3079.63619415575	-0.0101713759765872	0.105168896812739	-0.0967146778642937	0.922952983226334	0.990518488131166
ALDH5A1	2621.18872668847	0.605726375689892	0.0931940061849657	6.49962803925055	8.05188459968993e-11	8.78886938256362e-10
ALDH6A1	1329.89925580655	0.434025035884134	0.124276472382377	3.49241515762302	0.000478673633780378	0.00135168778939142
ALDH7A1	2320.71341893777	-0.445376896436982	0.145994994298522	-3.05063128072941	0.00228360823125995	0.00554196543733737
ALDH8A1	23.6485435753145	0.224424716412053	0.17002695819109	1.31993607837074	0.18685636066271	0.273955702432076
ALDH9A1	3259.06768777199	-0.0650902969827691	0.0693417998643698	-0.938687733951	0.347891092954196	0.462194778573775
ALDOA	19787.4054373597	0.155398650620594	0.0715016128267726	2.17335867649698	0.0297533324424994	0.0552015658547657
ALDOB	7.40396169574684	0.116860657992457	0.145649902697145	0.802339416837438	0.422356647373753	0.543553030008669
ALDOC	18871.7828756513	0.699098787036736	0.152475197746004	4.58500003522742	4.53986359370115e-06	1.9562666690523e-05
ALG1	357.799507895369	-0.45397939254655	0.0707552661507937	-6.41619228142014	1.39724951417451e-10	1.46568315561148e-09
ALG10	58.3406164935801	-0.427808577901602	0.0998599944540592	-4.28408373383614	1.83493802680845e-05	7.01922318792868e-05
ALG10B	316.908246018219	-0.0844672551278466	0.0778648877631161	-1.08479261390341	0.278013517585221	0.38432990052736
ALG11	11.8568919222777	0.154594737501276	0.0927287619114487	1.66717137503579	0.0954803328821895	0.153654668307644
ALG12	306.935566474423	-0.368076940507629	0.0549838953422265	-6.69426817101031	2.16753608665133e-11	2.61095663342611e-10
ALG13	453.192509581682	0.0362333798964291	0.0496318598013789	0.73004275965944	0.46536404796179	0.587651604708253
ALG14	165.781026185837	-0.383678037342851	0.0557169820575077	-6.88619561172286	5.73041820782347e-12	7.70778818981915e-11
ALG1L	25.9632318130189	0.325722958386256	0.195173707354091	1.66888748900649	0.0951396795062849	0.153169697140054
ALG1L2	0.00553608702506999	0.0413709078295113	2.90030575372639	0.0142643263650244	0.988619100171593	0.997580121386579
ALG2	448.595884518961	-0.401403788800938	0.0418484378426504	-9.5918464223255	8.65225406619196e-22	7.7001110388165e-20
ALG3	429.949734798443	-0.360289783523512	0.070439934349573	-5.11485121118226	3.13988358297477e-07	1.71178548341758e-06
ALG5	385.655091219794	-0.212016847124238	0.0497292492473388	-4.26342344461561	2.01318493995389e-05	7.63959783483279e-05
ALG6	197.36826809125	-0.520337103721653	0.0781079039256722	-6.6617727217057	2.705441906485e-11	3.20183930710914e-10
ALG8	504.811181485662	-0.306341922896126	0.0408406740141617	-7.50090272236692	6.33798148567612e-14	1.21462398383311e-12
ALG9	551.715501667744	0.0932178237767377	0.038873837087727	2.39795787501944	0.0164867611507065	0.0326021687121824
ALK	130.412538653759	-1.01556880914922	0.226760146720775	-4.47860359871682	7.51329052461516e-06	3.10373107937154e-05
ALKBH1	208.2883160136	0.0940877682280755	0.0458919949703719	2.0502000030467	0.0403449177073186	0.0722248220866845
ALKBH2	457.706332587151	0.175034388785936	0.0777126432605739	2.25232833992068	0.0243015305194374	0.0459975555816097
ALKBH3	263.632572906623	-0.142002704084881	0.0615458981164621	-2.30726512132737	0.0210400446744827	0.0404967875474687
ALKBH4	480.672665007641	-0.0478237361843939	0.0609398989760481	-0.784768878648627	0.432589090021812	0.554572213676584
ALKBH5	2021.19676757242	-0.111530099968342	0.0349128594963377	-3.19452779226064	0.00140059798835329	0.00355438213450593
ALKBH6	128.732027126735	-0.120098270424083	0.0860803673980946	-1.3951877071884	0.162959242988598	0.243975698713149
ALKBH7	672.330864460686	0.0346438767865076	0.0836235559218958	0.414283707558011	0.678666344273065	0.795621476684634
ALKBH8	239.6369032544	-0.129328827424486	0.0586411190534023	-2.20542904897008	0.0274240014844609	0.0512949893408966
ALLC	0.887943690477552	-0.0816471843919052	0.483278941673758	-0.168944221134762	0.86584051566276	0.950824411216316
ALMS1	579.084243753513	0.058868111550292	0.0702147876824441	0.838400477923982	0.401805821127885	0.521547306982562
ALMS1P	7.76982564019461	0.473479064148101	0.136722747318847	3.4630599035866	0.000534069480000531	0.00149361661145219
ALOX12	5.06124004161308	0.139757251971726	0.123448482155345	1.1321099257896	0.257588222396192	0.360401611952748
ALOX12B	4.01436555464494	1.02243925936878	0.245270411110008	4.16862048194718	3.06448760302986e-05	0.000112607208489917
ALOX12P2	5.57706027746175	-1.98828886377896	0.305095552948573	-6.51693820038768	7.17569714472698e-11	7.90584156872407e-10
ALOX15	2.26146242621931	-1.42094886203789	0.422977763517321	-3.35939376628651	0.000781136777434658	0.00210513769250574
ALOX15B	141.676359789203	-0.734397465424569	0.338693040712992	-2.16832759208329	0.0301337705241092	0.0558276794215673
ALOX5	361.700222737097	-0.968625334131942	0.131663642033066	-7.35681710740373	1.88347121903363e-13	3.25721863877245e-12
ALOX5AP	594.86643006327	-1.26274359463126	0.141943194802292	-8.89611929892166	5.78334120872467e-19	2.98193968672074e-17
ALOXE3	5.48014439002048	1.04131959259645	0.221374215789317	4.70388834076086	2.55252882550035e-06	1.16235483198602e-05
ALPI	0.00519988367724416	0.0413709078295113	2.90030575372639	0.0142643263650244	0.988619100171593	0.997580121386579
ALPK1	178.54170938887	-1.20802556652251	0.124470042602338	-9.70535191654077	2.86087332141657e-22	2.91928905939313e-20
ALPK2	9.16859254400885	-1.36982119300517	0.329738721411391	-4.15426246314623	3.26338424306195e-05	0.000119085113082339
ALPK3	281.953738707917	-1.03614959431361	0.135915143553363	-7.62350365989051	2.46881296946948e-14	5.12429869807882e-13
ALPL	513.053442243813	0.0811018030447127	0.123570332939684	0.656320988341912	0.511617616013205	0.635892311465937
ALPP	0.079508311076885	-0.362578632480797	2.90030575372639	-0.125013934139511	0.900512519034274	0.975380070911304
ALPPL2	0.0267387149451062	-0.0154436686700677	2.90030575372639	-0.00532484157928013	0.995751411192551	0.997580121386579
ALS2	803.745497589789	0.0402773089911985	0.0514185681201752	0.783322260103833	0.433437894582374	0.555470377373332
ALS2CL	60.4561118853246	-0.437512706824373	0.177114351890572	-2.4702272975297	0.0135027226065198	0.027234612811867
ALS2CR11	3.84445976739564	-0.192576839321883	0.193007489590761	-0.997768738043322	0.318391512664904	0.429413229661545
ALS2CR12	10.416426472185	-1.11053034207391	0.208539745457843	-5.32526948105637	1.00803481103106e-07	6.0787742781545e-07
ALS2CR4	850.472196592223	-0.376236565859695	0.0707207031472771	-5.32003429146025	1.03747695211619e-07	6.24279894928822e-07
ALS2CR8	237.106876904086	0.261702390545512	0.0714644546400957	3.66199381025825	0.000250259907826588	0.000752594600145069
ALX1	0.29189572346678	-1.4229532523036	1.03610392441801	-1.37336923330628	0.169637589410843	0.252654487056192
ALX3	58.8800847647222	-0.0832107762181353	0.1143797001426	-0.727496016464414	0.466922154730769	0.589513039820087
ALX4	3.33928494635461	-2.43649262622001	0.470110273854093	-5.18281084615525	2.18566672351782e-07	1.23259966554868e-06
AMAC1	0.096614204017904	0.459612144810769	1.13303063225083	0.405648472096226	0.685000908002555	0.801360606060612
AMAC1L2	1.13113858479272	0.43201544227445	0.238280902387481	1.81305105841814	0.0698239466738139	0.117028168704939
AMAC1L3	0.733039725561803	0.781399859652604	0.296408308770614	2.63622792118596	0.00838334005167145	0.0178316378486387
AMACR	329.736897578578	-0.30358547557007	0.0737260542590809	-4.11775021220097	3.82589047122318e-05	0.000137652954188924
AMBN	0.0899494168995847	0.195457035280622	2.77645909198229	0.0703979525018221	0.943876920874052	0.997580121386579
AMBP	0.631094192630303	-1.9568193788288	0.938520179618111	-2.08500511904287	0.0370688358698467	0.0669885592121754
AMBRA1	882.357795537486	0.144114404906089	0.0435412614213034	3.3098353194604	0.000933508764653982	0.00246599157266279
AMD1	1822.01440324193	-0.302680793144935	0.0658667966835069	-4.59534710028986	4.32029494107813e-06	1.87033648159957e-05
AMDHD1	12.8663940210779	-0.527312273026653	0.153004974753085	-3.44637338673212	0.000568164736068527	0.00157990165586754
AMDHD2	208.141876224244	-0.10178747588499	0.0762363577087818	-1.33515659646034	0.181825099106265	0.26779801870937
AMELX	0.0694632632020615	0.39832885429202	2.23691312639711	0.178070775119278	0.858667393270229	0.945077224691482
AMELY	0	NA	NA	NA	NA	NA
AMFR	3885.25516406719	-0.0819365381044431	0.0446024426989531	-1.83704149697537	0.0662037696041227	0.111618639237401
AMH	99.8312689404631	1.096973065882	0.212816975373881	5.15453743271567	2.54257769128694e-07	1.41342952661673e-06
AMHR2	0	NA	NA	NA	NA	NA
AMICA1	32.164568893746	-1.37657067251508	0.244221564021832	-5.63656480552237	1.73475771546327e-08	1.20022818155411e-07
AMIGO1	256.21948188849	0.347809928297719	0.13385120759638	2.59848181083669	0.00936370057129151	0.0196891276442412
AMIGO2	170.135868976457	-1.76011129026773	0.197875857678844	-8.89502797822068	5.84045826191413e-19	3.00344410355426e-17
AMIGO3	147.308089129907	-0.129371394516012	0.0795082954452739	-1.62714335392914	0.103706655154372	0.165107229942714
AMMECR1	108.519992802602	-0.0220792416127067	0.0714332578056601	-0.309089103464594	0.757253747808492	0.864963695996455
AMMECR1L	687.494315945778	0.172953180643898	0.0418090258022228	4.13674266083241	3.52270796015186e-05	0.000127616316251598
AMN	0.710250962717636	0.362807478591797	0.335751922803965	1.08058198315555	0.27988310045032	0.38624383118153
AMN1	344.116185630228	0.151688687519045	0.0673583006573805	2.25196725627941	0.024324341304245	0.046036260635049
AMOT	2519.23759340677	-0.00216109547224014	0.130817619480488	-0.0165199113148705	0.986819617322907	0.997580121386579
AMOTL1	1689.60095714742	0.395758120645303	0.084843847275699	4.6645470868299	3.09297505309999e-06	1.38229955938818e-05
AMOTL2	2465.71370026334	0.606083789788537	0.123861472929536	4.89323899880742	9.9189830115722e-07	4.91036268467214e-06
AMPD1	0.0771841828016698	-0.36257831761553	2.81512112496977	-0.128796702351279	0.897518514939672	0.973164720788551
AMPD2	1736.43921962655	0.39311070472747	0.0536876219772017	7.32218508196179	2.43965346948368e-13	4.13828077634786e-12
AMPD3	374.419778403442	-0.598158145945829	0.115601497642048	-5.17431138996128	2.28753051730039e-07	1.28447046333001e-06
AMPH	524.705088396571	0.601584288481609	0.168944187609624	3.56084631849944	0.000369661403594031	0.00107193165350466
AMT	222.285960507741	-0.249470581745453	0.137733462099747	-1.81125616057473	0.070101208419219	0.117440310230507
AMTN	0.0501707127971172	-0.248056978794031	2.90030575372639	-0.085527871837416	0.931841738126532	0.996193048987226
AMY1A	3.66761954866318	0.216270450545091	0.241800300324749	0.894417625845087	0.371098485353008	0.487510749496504
AMY2A	3.98985207546484	0.652083409732632	0.222219384738454	2.9344128123661	0.00334179424549611	0.00781141398953216
AMY2B	305.993181525797	0.357128348422655	0.143510802294728	2.48851196364452	0.0128278921145773	0.0260053689736958
AMZ1	163.759877168261	1.07041419570946	0.144192033222771	7.42353215905985	1.14037463076258e-13	2.05414986631818e-12
AMZ2	1724.43289272592	-0.196923471569693	0.0472401882094856	-4.16855815003192	3.0653256207537e-05	0.000112616769742676
AMZ2P1	493.683133488014	-0.0495102964889397	0.069195694622445	-0.715511228828391	0.474293204895573	0.597464746859793
ANAPC1	414.815206656794	-0.0474952393295205	0.0696679592927507	-0.681737197582342	0.495405142029942	0.619296146376984
ANAPC10	105.837095160871	-0.157237452831772	0.0444041048755291	-3.54105669447746	0.000398527934219043	0.0011461279973335
ANAPC11	1566.16996892485	-0.0598610187756322	0.073801585241385	-0.811107492878954	0.417303943274138	0.538398577800908
ANAPC13	1237.62737353851	-0.0134149313939717	0.0439572360745204	-0.305181412480745	0.760227988260412	0.86724281481975
ANAPC16	1291.86260304691	0.0393738768961857	0.0592817538337913	0.664182051809373	0.506573799407312	0.630870501626103
ANAPC2	1070.01578848186	0.168420121293392	0.0527303032468097	3.19399113836089	0.00140320424608113	0.00355914247216571
ANAPC4	476.62584601785	-0.0367517378155325	0.0474857125227295	-0.773953592839971	0.438958235114164	0.560966231878241
ANAPC5	2223.08280150735	0.081583019259897	0.0447958216352573	1.82121939684852	0.0685735131091127	0.115135920959391
ANAPC7	1093.37367873904	-0.143912414918182	0.0423588099117321	-3.3974612416654	0.000680142218669211	0.00185918258651654
ANG	64.3744841906895	-1.521503448399	0.147600464691213	-10.3082564921598	6.46637547332412e-25	1.10552331557094e-22
ANGEL1	862.924373613089	0.317148516658487	0.0679895975650748	4.66466236036969	3.0912417944751e-06	1.38184180216329e-05
ANGEL2	733.136845276768	0.134775139541831	0.041933317152072	3.21403477461767	0.00130883821027874	0.0033472322160258
ANGPT1	217.205728070498	-1.78256496462061	0.215580577589077	-8.26867143856716	1.35460011676268e-16	4.31765111774043e-15
ANGPT2	287.543729534453	-0.972657704511624	0.213020702589312	-4.56602430040255	4.97061172035664e-06	2.12496649330447e-05
ANGPT4	3.79040637335295	1.08352496966476	0.250887833654966	4.31876250784996	1.56906514868684e-05	6.09427655398695e-05
ANGPTL1	131.255898888114	-0.0918037871464511	0.206555007745922	-0.44445200408492	0.656715822104524	0.774773784659441
ANGPTL2	3476.74205394715	0.860859223156533	0.123299564259363	6.98185130115871	2.91315383975467e-12	4.11132283394775e-11
ANGPTL3	0.137564404473995	-0.181419124955464	1.03153841245538	-0.175872389011313	0.860394197589015	0.946336507393336
ANGPTL4	470.529792064288	-1.06036281959572	0.190649001746481	-5.56185875552473	2.66916290330922e-08	1.79261051818342e-07
ANGPTL5	1.95385273057167	-0.713487954743669	0.262608814657119	-2.71692309976438	0.00658919154985688	0.0143907825310075
ANGPTL6	18.593707564306	-0.924846164185635	0.177849354941376	-5.20016597468397	1.99110643883466e-07	1.13238005523453e-06
ANGPTL7	2.40293194415933	-2.49160364535888	0.404291546925098	-6.16288830253601	7.14298949424524e-10	6.45418939466109e-09
ANK1	202.900304834815	0.640195272725875	0.168321333370349	3.80341136745444	0.000142717070130091	0.000453022100461803
ANK2	6281.21327939157	-0.120409865019169	0.0934134932720597	-1.28899863179814	0.197398562238051	0.287218960658426
ANK3	733.194951971668	0.0692978001987463	0.186715160640795	0.371141796739592	0.710531921351386	0.824890823632267
ANKAR	20.7148503348662	0.0985616910917021	0.0960809529483974	1.02581924998847	0.304976790614271	0.414822921981446
ANKDD1A	281.570088149329	0.273256930867291	0.0874961104711233	3.12307517895295	0.00178972026449341	0.00444239021331846
ANKFN1	89.0451343055156	0.0578159585185601	0.132099823853856	0.437668702590572	0.661626460314196	0.779034609520933
ANKFY1	4266.4631017823	-0.0134097320324149	0.0553538011168589	-0.242254944770735	0.808582622907761	0.906539077339637
ANKH	1815.46899075249	-0.0832983680628245	0.0848558298259302	-0.98164578949613	0.326274380878967	0.437953697199109
ANKHD1	1623.77542673312	0.150380293064066	0.0564317162995676	2.66481870347116	0.00770298378576836	0.0165197132465477
ANKHD1-EIF4EBP3	391.916539824709	-0.313542728712722	0.0850997180619626	-3.68441559917304	0.000229227964487458	0.000696136447364943
ANKIB1	2797.20394474792	-0.0530629149112774	0.075678335392151	-0.701163875187202	0.483200751406065	0.606646653240415
ANKK1	3.20002184159404	-1.95266890421001	0.342599356059667	-5.69956968591015	1.20110220080522e-08	8.60010356123941e-08
ANKLE1	29.6617853713054	0.464540242500226	0.125112408228746	3.71298298127947	0.000204830665828641	0.00062868498850397
ANKLE2	1177.99843423156	0.0407859470714602	0.0358094490938457	1.13897164305914	0.254714981801372	0.357022293801419
ANKMY1	172.921709245259	0.00646540291374044	0.0710903654243463	0.0909462607928336	0.927535291677626	0.993741250632465
ANKMY2	630.165959332192	-0.253138709503626	0.0650783157755744	-3.88975508180922	0.000100345443833973	0.000329081726455349
ANKRA2	307.21481381346	0.21678812954114	0.0464603879051906	4.66608522476242	3.06992411687753e-06	1.37325731094659e-05
ANKRD1	1.85150773100607	-1.30520529838128	0.412789451766416	-3.16191533673165	0.00156735126273442	0.00393250207398221
ANKRD10	2078.15727874604	-0.149453873353148	0.112665274565773	-1.32653005932097	0.184664185258007	0.271364319586712
ANKRD11	2681.22333939603	0.104225861527421	0.0424996076218315	2.45239585397682	0.0141908451855759	0.0284751953739189
ANKRD12	1110.66075400182	0.118612351846685	0.061173211277	1.93895905365493	0.0525063242410597	0.0911993814685192
ANKRD13A	1012.87085845435	0.0438824130912848	0.0527854966396136	0.831334663589252	0.405784597625695	0.525589812208429
ANKRD13B	753.792253902636	0.606152657813617	0.0873543483410103	6.93900955505207	3.94858429056736e-12	5.42721493816346e-11
ANKRD13C	681.386516356981	0.0967284616732525	0.0354467910146451	2.7288354997576	0.00635584005378194	0.0139577828336011
ANKRD13D	623.926913974656	0.154563012412682	0.06765408564417	2.28460721833731	0.0223358693030439	0.042699960050645
ANKRD16	193.817958252886	0.661335706821822	0.069855881207724	9.46714428890059	2.87598652129359e-21	2.29725316803328e-19
ANKRD17	2307.51515713661	0.0572871237159696	0.0663516213397967	0.863386946079186	0.387924754230398	0.506135591106605
ANKRD19	65.1879067954583	0.519928968815821	0.11215965361784	4.63561496531872	3.55877863140898e-06	1.56995462938345e-05
ANKRD2	5.2429685880114	-0.0382704236115674	0.288965694820626	-0.132439332064394	0.894636806172376	0.970958422558169
ANKRD20A3	75.1895781189559	0.988779071769638	0.197913630350974	4.99601300838234	5.85277142724599e-07	3.03298365107749e-06
ANKRD20A4	6.13078080049226	1.11584211980177	0.282810439022423	3.94554785056323	7.96177296811695e-05	0.000267082538982099
ANKRD20B	26.941479492558	0.921564521028027	0.178862114492901	5.15237407117092	2.57209330705438e-07	1.42780115506949e-06
ANKRD22	200.556271816595	-0.71126661551386	0.223183855189329	-3.1869089048152	0.00143802058444767	0.00363515190543257
ANKRD23	56.6210588788263	0.54651233569482	0.0959006049762915	5.69873710212703	1.20698183280264e-08	8.63902898322567e-08
ANKRD24	210.609218185264	0.594162801657513	0.141198069734501	4.20800937841951	2.57630176829053e-05	9.58978637585606e-05
ANKRD26	254.118812127378	0.598636656324491	0.0786478166287826	7.61161189191118	2.70698401703328e-14	5.58297550179668e-13
ANKRD26P1	0.59443888981768	-0.502003772357284	0.491207986280763	-1.021978034515	0.306791296712238	0.416738386738328
ANKRD27	623.115386703563	-0.0733836370321203	0.0500414326480356	-1.46645755624666	0.142523676085957	0.21754142430224
ANKRD28	1386.778596824	0.521758191410155	0.0730787635069843	7.13966912371594	9.35558449692071e-13	1.44256599560906e-11
ANKRD29	40.5164203159477	-0.276707640995225	0.185814326975935	-1.48916203340479	0.1364447058202	0.209460248616549
ANKRD30A	0.00511090731269006	-0.0172286700452833	2.90030575372639	-0.00594029440625266	0.995260358681341	0.997580121386579
ANKRD30B	0.96391330581257	1.45841901467777	0.482821486859359	3.0206174629146	0.00252259840704053	0.00606082876642258
ANKRD31	0.653495901619542	-0.0410710505496051	0.360290633603213	-0.113994222216824	0.909242373591386	0.981019367875117
ANKRD32	117.481864395424	-0.484986493130321	0.0876085764440435	-5.53583350872145	3.09751706180569e-08	2.05132883230013e-07
ANKRD33	0.278259051399368	0.651477318061867	0.55510588818989	1.17360909318802	0.240551637294429	0.340373388812829
ANKRD34A	102.217283038495	0.563289936026415	0.171325489166612	3.287834978709	0.00100960999896585	0.00264550939497774
ANKRD34B	1.81477219303484	1.01185341027322	0.393221643184127	2.57323936210555	0.0100751500852529	0.020992588749367
ANKRD34C	7.32749755887874	1.04535906144658	0.370948023027828	2.81807422213479	0.00483126403110301	0.0109235888591877
ANKRD35	301.251106925521	-0.327392981347549	0.180405373472448	-1.81476291446246	0.0695603518631101	0.116652147462744
ANKRD36	219.188264916444	0.591497494973443	0.108714158123281	5.4408506231791	5.30267638699132e-08	3.38516746748971e-07
ANKRD36B	30.0029314445816	0.752721316634289	0.134901598385096	5.57978056335208	2.40822205584522e-08	1.62634261498348e-07
ANKRD36BP1	97.2550740516277	-0.314819776083187	0.148811215630316	-2.11556484334674	0.0343818345626082	0.062684935044456
ANKRD37	84.6088875158398	0.0180196177860311	0.0962836042445855	0.187151467037488	0.851541876109181	0.939521056730607
ANKRD39	140.331723317863	0.110592806589204	0.0688003172888585	1.60744617099482	0.107956528653623	0.171076733348981
ANKRD40	2712.2661442142	-0.167874839073619	0.0629870434758252	-2.66522811374771	0.00769361155090759	0.0165050620943521
ANKRD42	253.656949973922	-0.354947802143182	0.0649411234165539	-5.46568620112142	4.61119456125903e-08	2.96999940512024e-07
ANKRD43	227.709154842998	0.595458563795425	0.231463734143555	2.57257823130996	0.0100944139415075	0.0210282308379629
ANKRD44	165.44223291611	0.192077320093858	0.123096170928131	1.56038419916409	0.118669116526481	0.185533537710663
ANKRD45	95.0006848232663	-1.81836714278868	0.194108825338789	-9.36777160757625	7.40799852755534e-21	5.4690110341687e-19
ANKRD46	1267.78864371491	0.387263476019169	0.0788661259402331	4.91039050545792	9.0895199110447e-07	4.53081184312689e-06
ANKRD49	179.145846715647	-0.0502520790935748	0.046658212261761	-1.07702538647755	0.281468924435633	0.388075080450657
ANKRD5	20.3253859955524	-1.99472976153535	0.212901474521352	-9.36926231262576	7.30412253441005e-21	5.43348657235313e-19
ANKRD50	570.64611376578	0.117412773406111	0.0873643996622472	1.34394300035291	0.178966819561708	0.264227203488954
ANKRD52	1413.93166169533	0.07491238213309	0.0601421533040657	1.24558862657194	0.212915459895384	0.306517055665958
ANKRD53	24.9803987301993	-1.87135366001299	0.20634335305712	-9.06912499136796	1.19976595506741e-19	7.00102948031848e-18
ANKRD54	521.282456466255	-0.110541990570885	0.0623778356092073	-1.77213571922282	0.0763720308988304	0.126572353930119
ANKRD55	8.56571860640687	-0.064619297108448	0.192728855005634	-0.335286053074714	0.737409313506579	0.847772589206869
ANKRD56	14.6323995981503	0.984448780405483	0.311472197353178	3.16063131403416	0.0015742762617337	0.00394936855981333
ANKRD57	345.679030135224	-0.290706845113218	0.0705801584158583	-4.11881825768049	3.80820342226483e-05	0.000137041884601074
ANKRD58	26.7458318048614	-0.751420675627146	0.14606072517179	-5.14457719378949	2.68123986571473e-07	1.48585058239352e-06
ANKRD6	741.993469807674	0.106887610612014	0.08223117596834	1.29984290451065	0.193654817134992	0.282679178097737
ANKRD7	3.77534649877927	-0.902473621976339	0.241491328080523	-3.7370850090129	0.000186165996532583	0.000575932582923816
ANKRD9	76.5627333141761	0.199533417578474	0.144689554347725	1.37904507673682	0.167880856198469	0.250401613783436
ANKS1A	1137.01893999225	0.158421161347878	0.0618339984814563	2.5620397392769	0.0104059411084525	0.0216092739997865
ANKS1B	677.090254480106	0.19031357087233	0.150586944704862	1.26381188784545	0.206297553300908	0.298318690743041
ANKS3	467.345742230812	0.168520900753595	0.100785355616094	1.67207725490909	0.0945090890975583	0.15226768178155
ANKS4B	0.086037562559366	0.282918265718961	1.45202968286306	0.19484330730837	0.845515617634414	0.9347722155366
ANKS6	521.481458609927	-0.0730317758506973	0.070487174072018	-1.0361002098918	0.300155394321726	0.409486987696592
ANKZF1	721.020140586723	0.387726041919084	0.0944408959035789	4.1054888161474	4.03460804676284e-05	0.000144336473625932
ANLN	1501.63769859107	-0.494514744784476	0.192682263430151	-2.56647776490203	0.0102737211845201	0.0213629388548273
ANO1	38.9096951339119	-0.374347528737509	0.187985590912601	-1.99136288542217	0.0464410064869353	0.0818297678251544
ANO10	523.116582836717	-0.286681380268265	0.0574731301251322	-4.98809408229714	6.09778732587823e-07	3.14906928938438e-06
ANO2	15.703152642862	-0.134858807874628	0.160743809746498	-0.838967348648183	0.401487632438941	0.521318717937039
ANO3	88.0633074641989	0.968159160858979	0.243492954456234	3.97612802810275	7.00464246033204e-05	0.000237468223259474
ANO4	80.5951271442741	0.145322927176962	0.187804815441749	0.773797662403584	0.439050455101609	0.561047296743401
ANO5	179.758410496248	-0.0821251886677271	0.177154235118731	-0.463580160037867	0.642948571509262	0.76274074251114
ANO6	1767.60568959971	-0.657512008670497	0.104095046426064	-6.31645819128877	2.67625806595401e-10	2.64370348228301e-09
ANO7	18.8310543712626	-0.702754904293738	0.176104016735749	-3.99056715070986	6.5915482747503e-05	0.000224675193905008
ANO8	971.657967190783	0.395082197941427	0.0814540514114272	4.85036890241166	1.23232061882682e-06	5.9865226472918e-06
ANO9	2.18925170734362	-2.01189282445826	0.418764584855597	-4.804352844575	1.55252834418151e-06	7.39460196607161e-06
ANP32A	2850.73552364549	0.0953139123268434	0.0477117102447513	1.99770479485859	0.0457486740824988	0.0807427019711946
ANP32B	2483.64450489623	-0.0571312397764145	0.0766006217880372	-0.745832585204115	0.455768553210617	0.577826650756191
ANP32C	2.34911657972759	-0.0222728055565429	0.188387879777347	-0.118228442205873	0.905886654375623	0.979187559967883
ANP32D	0.0816096894846889	-0.0984273909004599	1.13618983365266	-0.0866293536389356	0.930966132774582	0.99591250495508
ANP32E	1868.4302930882	-0.182341912817741	0.056454168909681	-3.2299104980088	0.00123828975963736	0.00318478060376512
ANPEP	53.2464933769672	-0.62835853657541	0.150807789416735	-4.16661857458194	3.09151121464821e-05	0.000113450486864044
ANTXR1	5361.17256869657	-0.05889526608362	0.0765923699709685	-0.768944297009528	0.441926379106746	0.563798201792923
ANTXR2	377.809338428304	-1.02244381210859	0.117397837669338	-8.70922184264074	3.05967944836731e-18	1.37403577070688e-16
ANTXRL	0.329296384433132	-0.691864575493876	0.582772742932758	-1.18719446625476	0.235150923140462	0.333849904720834
ANUBL1	106.149559720034	-0.0865260544146826	0.12193898043842	-0.709584860424338	0.477961610706058	0.601144887141376
ANXA1	2785.08015790617	-2.9620224230657	0.210997307215053	-14.0382001181027	9.09943992426298e-45	2.53354405891265e-41
ANXA10	0.0145733136802935	-0.0749357472324701	2.90030575372639	-0.0258371887640435	0.979387199397438	0.997580121386579
ANXA11	1143.42202478479	-0.437976996149657	0.102213765451138	-4.2849120587288	1.82811486018906e-05	6.99449521497541e-05
ANXA13	5.26261827039528	-0.844218072374741	0.268538072951155	-3.14375560641003	0.00166794676376573	0.00416503327987988
ANXA2	2042.97850276768	-1.74184538311099	0.165126092562127	-10.5485774905964	5.15719618903375e-26	1.09254080135074e-23
ANXA2P1	12.0915547309014	-1.64297262524059	0.187746251001137	-8.75102760497005	2.11418644859062e-18	9.83424675012678e-17
ANXA2P2	712.857777787946	-1.91524506046582	0.183290645518985	-10.4492242636978	1.47728584376889e-25	2.8352100295529e-23
ANXA2P3	1.34700484355201	-2.52970364562754	0.370468748497183	-6.82838608084853	8.58752215490201e-12	1.12404840026219e-10
ANXA3	45.9261355025901	0.288367664153778	0.234689249408994	1.2287212340572	0.219176342065928	0.314099037269481
ANXA4	448.335792337727	-0.832311036096931	0.0889447182598308	-9.35762181702046	8.15515584345413e-21	5.93074579809407e-19
ANXA5	6749.05260314707	-0.916514367326538	0.105908698411461	-8.65381579675195	4.98055718741824e-18	2.13812906570004e-16
ANXA6	4618.46482151372	0.159229902313608	0.0717538523701177	2.21911294033768	0.0264790418992323	0.0496896328342035
ANXA7	2062.14350171724	-0.0224673981498577	0.0619306120981283	-0.362783402080031	0.716766691638741	0.830496570955297
ANXA8	2.19595743519418	0.171412167955918	0.361734871566678	0.473861331680657	0.635598795274799	0.755815773026591
ANXA8L1	0	NA	NA	NA	NA	NA
ANXA8L2	1.68559881446822	-0.339334457494644	0.419136947571532	-0.809602826619648	0.418168483012102	0.53931337572167
ANXA9	48.8408261175581	0.368451701765037	0.0787869596410962	4.67655692570789	2.91731642663262e-06	1.30950016478742e-05
AOAH	254.425620754298	-0.578379426730551	0.139408740022126	-4.14880320013476	3.34217972412642e-05	0.000121777280930348
AOC2	24.9929613767007	0.67820786337981	0.141434068758794	4.79522274464468	1.62494171419343e-06	7.71688937856482e-06
AOC3	52.4057787986398	0.0956662228953461	0.147519227020537	0.648500028284638	0.516661592539636	0.64118016164263
AOX1	33.1929846730228	-2.14926682928611	0.262387288929911	-8.19120025993418	2.58633835180404e-16	7.61446140130828e-15
AOX2P	0	NA	NA	NA	NA	NA
AP1AR	372.513669693916	-0.0529088158259116	0.0612854074746357	-0.86331833312537	0.387962467088695	0.506150912615213
AP1B1	4544.16781166567	-0.032607123130784	0.057581173731298	-0.566280973759666	0.571202792172369	0.694537551902145
AP1G1	2111.2642670852	-0.00486940489977162	0.0428033819276536	-0.113762153373813	0.909426340995264	0.981163541987141
AP1G2	345.004245070615	0.318550115369622	0.0992423435706967	3.20982056558044	0.00132817855010319	0.00339268675511286
AP1M1	1739.54996254838	-0.17508414586531	0.0380169598397823	-4.60542206960208	4.11630118625114e-06	1.78877837502864e-05
AP1M2	0.704454957807935	0.249117635983164	0.428083421482718	0.581937125993611	0.560609032118165	0.683660995869293
AP1S1	1117.86423781976	-0.00134495850824955	0.0812872321368903	-0.0165457535321733	0.986799001034469	0.997580121386579
AP1S2	1049.21617980111	-0.44658220595119	0.0836980060059162	-5.33563733787904	9.52095317641767e-08	5.75926062719989e-07
AP1S3	25.9875637191524	-1.0236406666717	0.148629215792333	-6.88721030528714	5.68970797036399e-12	7.66360804024838e-11
AP2A1	2980.23113710453	0.232778032849074	0.053618137067216	4.3414047108213	1.41574675733847e-05	5.5485429922636e-05
AP2A2	2430.33906158648	0.227626073059779	0.053097470325972	4.28694760150255	1.81144999938261e-05	6.94027137565698e-05
AP2B1	10736.4798304066	0.265953215131196	0.0555264739014647	4.78966511727625	1.67059882422095e-06	7.91635572187366e-06
AP2M1	8449.3931071091	0.0203325559407611	0.0557831169465823	0.364493005298206	0.715489896069474	0.829382014817425
AP2S1	1037.26577301502	-0.190697662610742	0.0757780538395072	-2.51652890181934	0.0118517179313423	0.0242611051866255
AP3B1	877.229840075911	-0.371399384361159	0.0483800395311102	-7.67670692212509	1.63230295347186e-14	3.49599830364467e-13
AP3B2	741.318047663368	0.775921658574263	0.11089318708477	6.99701829275703	2.61467159629737e-12	3.71970433663035e-11
AP3D1	3702.03146383487	0.122223077928411	0.0416025265723727	2.937876326232	0.00330468823696537	0.00773860071349935
AP3M1	1300.75659442341	0.156329646192841	0.0562217869936291	2.78058835466321	0.00542604920468058	0.0120902822681176
AP3M2	901.867598941947	0.0527399480687163	0.0653834410575254	0.806625457695242	0.419882302134484	0.541058252469494
AP3S1	616.713265965991	-0.166661622501358	0.0485611066721896	-3.43199803139583	0.000599151907444603	0.00165661379998515
AP3S2	2020.85289094655	0.120012149293239	0.0425401763020896	2.82114837609039	0.00478520644657912	0.0108320178448115
AP4B1	400.843163427	-0.0306476572260309	0.0596069950639072	-0.514162091096393	0.607138669328307	0.728795334492417
AP4E1	254.884768244671	0.0269546202870116	0.0487931605969793	0.552426199844908	0.580656384354452	0.703268265664198
AP4M1	386.044780000007	-0.294772537445426	0.0660308133122445	-4.46416638928124	8.03810831130834e-06	3.29400191310764e-05
AP4S1	128.737440268351	0.138175112170501	0.0681778361834982	2.02668667569043	0.0426944659864273	0.0758606201181027
APAF1	501.057552040841	0.0430158715761461	0.0616207898191204	0.698074005581776	0.485130913535966	0.60854719266863
APBA1	875.442290445115	0.459924443291859	0.102352997538832	4.49351220141225	7.00580053793473e-06	2.91136572461296e-05
APBA2	3630.5315201306	0.312958499180021	0.0646784201148897	4.83868496824916	1.30701024024201e-06	6.32728007509111e-06
APBA3	257.936834482158	-0.0757828450104523	0.0713206125374435	-1.06256581813099	0.287978895133922	0.395651252372772
APBB1	3815.8209096256	0.371426025871676	0.0751889102481968	4.93990436416232	7.81608964591181e-07	3.95574103346718e-06
APBB1IP	873.993912881322	-0.727655276707881	0.127263706344022	-5.7176967229044	1.07977635325721e-08	7.79727348091258e-08
APBB2	2257.78530909337	0.381990052763188	0.0822918031010748	4.6418967426684	3.4522538164656e-06	1.52710909856819e-05
APBB3	502.344304342091	0.351693821067929	0.105620113442962	3.32979969064183	0.000869084814992531	0.00231021045338304
APC	3875.76935113116	0.00158333705014026	0.084992512574643	0.018629135698862	0.985136959939621	0.997580121386579
APC2	8236.31890084916	0.529550702682811	0.0804206365387192	6.58476139302695	4.55616491167305e-11	5.1899271846001e-10
APCDD1	2443.44060395108	-0.162652630240103	0.101520899762081	-1.60215906893346	0.109120438667911	0.172640421271011
APCDD1L	14.494146791706	-3.74903294345023	0.632952724430899	-5.92308524593375	3.15956951333677e-09	2.5393818480385e-08
APCS	0.0403066760592248	-0.160603862325642	2.90030575372639	-0.0553748038872434	0.955839868615637	0.997580121386579
APEH	1530.28941947649	0.0446822576033984	0.0488326712037744	0.915007442802859	0.360187722851765	0.475871659326254
APEX1	3140.97009180712	0.085667828705689	0.056304289053857	1.52151514822867	0.128130612840505	0.198463454204994
APEX2	349.468828386736	-0.332132820195348	0.0433656678238184	-7.65888862924245	1.87548945291178e-14	3.98618205422581e-13
APH1A	3698.69410406692	-0.178436907697201	0.0379883170752547	-4.6971522150802	2.63813852434839e-06	1.19686498695415e-05
APH1B	864.196766382849	-0.0131722673020716	0.0560082910773197	-0.235184238774349	0.814065738587926	0.91138655412934
API5	1794.77632991765	0.00931778130545949	0.0397325117629978	0.234512767806867	0.814586922250811	0.911693207152712
APIP	330.854549588324	-0.105495986750509	0.0607805381716743	-1.73568694723525	0.0826192026911589	0.135498211468416
APITD1	183.350509543311	-0.512155274575561	0.0638772997128374	-8.01779782298207	1.07657814613602e-15	2.82022957905795e-14
APLF	28.7396034834306	-0.577611222373836	0.105438782312002	-5.4781666641847	4.29755255028565e-08	2.78362576288027e-07
APLN	1563.31576473628	-1.10081352258238	0.161373845885294	-6.82151135794863	9.00876451508379e-12	1.17053880265989e-10
APLNR	5139.53112207793	-1.22433385562427	0.23240971071575	-5.26799784679266	1.37919724675666e-07	8.08680936801666e-07
APLP1	6847.9038759523	0.0108445916094963	0.139100395027637	0.0779623350986288	0.937858014001226	0.997580121386579
APLP2	11976.2867478388	-0.243882422308805	0.06732711703924	-3.62235059265443	0.000291938082748985	0.000865906746732265
APOA1	2.80308459529622	0.165143154398174	0.210190804346956	0.785682108745237	0.432053747394137	0.554106276036818
APOA1BP	1608.51282526771	-0.225325068244724	0.0680829546344665	-3.309566534744	0.000934405548260185	0.00246769161728875
APOA2	0.15508408224813	-0.765635632709183	2.66864243845195	-0.286900793331204	0.774188283024315	0.878233492587387
APOA4	0.034405391471859	-0.131749093048877	2.67771922702859	-0.0492019819400842	0.960758331821655	0.997580121386579
APOA5	0.0756194040095069	-0.12817417516805	1.36358685045563	-0.0939978081522434	0.925110897869717	0.991826360057252
APOB	9.22810399865028	-2.42115121984594	0.29292085729006	-8.26554736403913	1.39055218751466e-16	4.42118468754662e-15
APOB48R	210.985813403924	-1.06619229522563	0.133732100736334	-7.97259812232916	1.55372785163955e-15	3.91242323365049e-14
APOBEC1	0	NA	NA	NA	NA	NA
APOBEC2	2.30227940327392	0.257065753817258	0.150883939644262	1.70373171871931	0.0884312195251971	0.143650980875654
APOBEC3A	2.45826546551388	-0.903715443420168	0.255865349915604	-3.53199619924407	0.000412435283300348	0.00118298214444795
APOBEC3B	28.2183930451373	-1.04367002812349	0.186849906565292	-5.58560636881451	2.32886192197298e-08	1.57712018273987e-07
APOBEC3C	135.416871742959	-1.43812831667622	0.144105949695551	-9.97965954712151	1.87107671377232e-23	2.46400575347449e-21
APOBEC3D	16.6261918202157	-1.27797810996008	0.17919985357968	-7.13158010138571	9.9223181878252e-13	1.52033004308737e-11
APOBEC3F	54.1475362125619	-1.30181124387043	0.145161757859825	-8.96800412907313	3.01935732658406e-19	1.64377861159562e-17
APOBEC3G	133.745883352992	-1.40534148803139	0.1344384672577	-10.4534179591437	1.41337806371307e-25	2.75467384617678e-23
APOBEC3H	3.38102302621267	-1.69379187830479	0.243996125685758	-6.94188021856636	3.86915227236762e-12	5.33308188037093e-11
APOBEC4	0.270088114007221	-1.53445058791833	1.94866041170799	-0.787438682850539	0.431025109647042	0.552967310888682
APOC1	2701.2557145226	-0.670317313206534	0.15234492522262	-4.39999765155949	1.0825204967833e-05	4.33497523778642e-05
APOC1P1	2.39495870844781	-0.629648611618498	0.288776455975496	-2.18040147868539	0.0292277146353113	0.0543039235693248
APOC2	908.639529451756	-1.23390084323716	0.16279536479701	-7.57945930939567	3.46998007327679e-14	7.05212842838006e-13
APOC3	0.182162178617528	-0.851303787196671	2.90030575372639	-0.293522083353761	0.769123122381608	0.874421609707609
APOC4	4.09217766304501	-0.578737025017837	0.212322503901388	-2.72574510183163	0.0064156522839055	0.0140732766475316
APOD	5088.98141410115	-0.562431370904321	0.180361564974055	-3.11835490552117	0.00181863662609228	0.00450498574511165
APOE	66178.9027265267	0.518745590478273	0.143097051018638	3.62513124334553	0.00028881474045606	0.000858079160287899
APOF	0.276851590832369	-0.227525421879553	0.854121674896317	-0.266385257003544	0.789942518365616	0.89121369357906
APOH	2.08837613106716	-0.913512340352988	0.579048346991856	-1.57760978871396	0.114655282189027	0.180052489715908
APOL1	356.848474741673	-1.45027183198223	0.160721828317795	-9.02349013299304	1.82190324469975e-19	1.04131654660405e-17
APOL2	1520.97997451917	-0.700661536185477	0.127958374642379	-5.47569893837508	4.35788060788231e-08	2.81989020742451e-07
APOL3	305.200928956361	-0.636531518861758	0.113672684295067	-5.59968758377759	2.14738453476135e-08	1.46133116559004e-07
APOL4	379.304482855387	-1.69957824539314	0.234429281144879	-7.24985478389448	4.17218708014988e-13	6.84477493199674e-12
APOL5	0.0610153417825691	0.0755861043928899	1.71032215667705	0.0441940742554282	0.964749705499486	0.997580121386579
APOL6	825.22116478273	-0.995811119488037	0.125448973278607	-7.93797743785803	2.05504708258949e-15	5.10227613244193e-14
APOLD1	1871.7176574649	0.113887514169416	0.152248126230606	0.748038855971952	0.45443672082552	0.576552327953889
APOM	89.1125372851556	-0.0418190504184822	0.0903273437309442	-0.462972215180461	0.643384283043235	0.763118286058462
APOO	405.492711954666	-0.18326492828233	0.0648729056473304	-2.82498412015976	0.00472829593197049	0.0107213760203624
APOOL	131.493074097166	0.0856484897228868	0.122187350052408	0.700960366896826	0.483327749406369	0.606705852096965
APP	28601.9500926502	-0.195905015628127	0.0674689264083748	-2.90363321393846	0.00368860011662016	0.00854670305009957
APPBP2	1522.53624502883	0.0833460773261663	0.0481858050157186	1.7296811228738	0.0836872632042061	0.137018208992774
APPL1	1535.84567876651	0.20944098765226	0.0534188709303827	3.92073033376558	8.82810095212798e-05	0.000293166957841156
APPL2	1972.46442775294	0.157994992562155	0.0637447422918499	2.47855724067074	0.0131914942785865	0.0266703551337811
APRT	732.459484708871	-0.260615645346513	0.0748778392913505	-3.48054441491634	0.000500395850543439	0.00140752130568504
APTX	461.815874381404	0.0227156201230514	0.0451085008460428	0.503577367835406	0.614558399911714	0.735733612670719
AQP1	19485.2259556738	-1.61806402937519	0.235331927207095	-6.8756672695383	6.17003610866265e-12	8.22530805457148e-11
AQP10	0.0708322303969896	0.0178785982266768	1.69898568588111	0.0105231011510287	0.99160393501741	0.997580121386579
AQP11	68.8874842209461	0.0279842006368619	0.06780785417536	0.412698513722188	0.679827513910223	0.796743129651849
AQP12A	0.0245107366878146	-0.0740432465448619	2.90030575372639	-0.0255294623505571	0.979632648584173	0.997580121386579
AQP12B	0.536381116890336	0.100580978661067	0.597672406613263	0.168287807079823	0.86635686560639	0.950962755392297
AQP2	0.376416241898645	-1.70755051079044	0.726776222321282	-2.34948593301061	0.0187993544447024	0.0366509370938532
AQP3	43.3553913349581	-0.158210945124282	0.237925244256501	-0.664960734278865	0.506075607970303	0.630411197708118
AQP4	30249.0448733707	-0.852533628935005	0.174694098403602	-4.88015128573701	1.06004492668837e-06	5.21987762030228e-06
AQP5	45.060203457527	-1.9031458551902	0.457827148438174	-4.15690913411878	3.22582217138406e-05	0.000117868905362346
AQP6	86.4985215067764	-0.20542521386477	0.145389947381087	-1.41292584229584	0.15767752978102	0.23734438179117
AQP7	2.2707359992015	0.653168347520475	0.238439551107635	2.73934565170199	0.00615616132218594	0.0135528729435676
AQP7P1	44.8540816990816	-0.13736629649364	0.293919962244515	-0.467359533679319	0.640242669316364	0.760085863737341
AQP7P3	5.9208334592121	-0.0130290577622354	0.333741036031776	-0.0390394238513568	0.968858956869811	0.997580121386579
AQP8	1.42916384667795	-0.121544223326849	0.314395404110914	-0.386596692373946	0.699054807023142	0.814380047153678
AQP9	15.2164531644622	-0.848871040920038	0.253351610535509	-3.35056500776049	0.000806468774396686	0.00216562088908672
AQPEP	4.22936465401829	0.182863781738158	0.172162113516242	1.06216041382941	0.288162867543389	0.395820303645123
AQR	709.36324969735	-0.0638942115593806	0.0676881074270402	-0.94395033319924	0.345195029274689	0.459178518725587
AR	102.214452007265	-0.441442891092159	0.185187844114705	-2.3837573853861	0.017136896059628	0.0337201518629127
ARAF	809.55966122607	-0.0347447754390996	0.049596706857737	-0.700546016870864	0.483586377789112	0.606896233297475
ARAP1	2634.07634683303	-0.0948510589316469	0.0597740280069309	-1.586827290954	0.112551766021971	0.177134521945107
ARAP2	1468.55954903909	-0.1448092818835	0.115887554800856	-1.24956715267954	0.211457708446565	0.304695455982814
ARAP3	405.095127722615	-1.03350646508146	0.168201836517873	-6.14444221583538	8.02449952864045e-10	7.19068946267597e-09
ARC	1347.03554383038	-0.14262450450506	0.23279946427388	-0.612649625075029	0.540108037840816	0.663936023810627
ARCN1	2741.32689407386	-0.102388267297602	0.0472240065340036	-2.16814020690678	0.030148020508298	0.0558434631920478
AREG	3.53196016867759	-1.92179907263459	0.56241502008619	-3.41704791657249	0.000633041365864688	0.00174043958537209
ARF1	6425.26129819938	-0.0483193899770025	0.0376573080697854	-1.28313446854614	0.199444969708871	0.289980041747549
ARF3	7482.90437444691	0.173819065369162	0.0668883704208805	2.59864404343301	0.00935927687728206	0.0196819493243664
ARF4	2809.81604883403	-0.407092997078137	0.0567503630972137	-7.17339898567316	7.31582382946483e-13	1.15267103020428e-11
ARF5	2498.01000873946	-0.114483120164001	0.0651122618593786	-1.75824210209818	0.0787063243506687	0.129943774806822
ARF6	1210.3841104902	-0.191266640496946	0.0418980859643402	-4.5650448247143	4.99387623481715e-06	2.13304071480575e-05
ARFGAP1	2294.91132865847	0.281522027555756	0.0807085724294905	3.48813043127113	0.000486410734847693	0.00137095375591924
ARFGAP2	2648.5033720344	0.282773033754198	0.0566874652299937	4.98828149409971	6.09187612681774e-07	3.14768466892041e-06
ARFGAP3	958.702116746163	-0.133628408014892	0.0478456101879286	-2.79290842963492	0.00522364768234602	0.0117062082705443
ARFGEF1	1029.69632241701	0.0346838271761	0.0535600207476842	0.647569337948765	0.517263534337038	0.64172286977905
ARFGEF2	936.336466778296	0.0322491546108998	0.0686338896965373	0.469872168887534	0.638446349329919	0.758276620867771
ARFIP1	644.921488342822	-0.389536184612613	0.043226309903971	-9.01155304438394	2.03158787928757e-19	1.15103627230566e-17
ARFIP2	958.485016886902	0.115364516749169	0.0521089832242693	2.21390842060105	0.0268350793672025	0.0502899708525747
ARFRP1	824.91172117732	0.0203885829854516	0.0703434200937079	0.289843498628457	0.77193596842864	0.876647944567893
ARG1	1.76607398153468	-1.58090673200025	0.374531842746063	-4.22102088946311	2.43198395931936e-05	9.09253162615276e-05
ARG2	177.966354610068	-0.077448837835627	0.0858514476830375	-0.902126171728253	0.366989847563293	0.483220654574286
ARGFX	0.0325941979359651	-0.102896785138455	2.90030575372639	-0.0354779095294523	0.971698660926045	0.997580121386579
ARGFXP2	0.537573468033967	0.807507033228753	0.352353942387136	2.29174967578917	0.0219200921091644	0.0419916055836066
ARGLU1	2370.62567264911	0.334836319165822	0.0998276272330275	3.35414482389944	0.000796106838379744	0.00214104074513885
ARHGAP1	2762.70175883319	-0.14611537924218	0.0591191367726399	-2.4715411492578	0.0134532067503762	0.0271375491166252
ARHGAP10	152.850592207242	-0.00856037757287721	0.10412946616929	-0.0822089835643648	0.934480529777414	0.997580121386579
ARHGAP11A	190.285936238297	-0.910982862158508	0.178305673668174	-5.109107542219	3.23684086292969e-07	1.75874068632561e-06
ARHGAP11B	13.3881051569563	-0.975147999741748	0.223177682005945	-4.36937954985916	1.24600042444312e-05	4.93187414142901e-05
ARHGAP12	1667.62484004093	0.233688708447302	0.0788365173514449	2.9642190738277	0.00303452170929316	0.00716275016520814
ARHGAP15	68.8944436186332	-1.10707425969643	0.141555526062815	-7.82077740437467	5.249810542889e-15	1.20375067624596e-13
ARHGAP17	908.273404309081	-0.072721384622905	0.0517797222334448	-1.40443751890067	0.160188605073657	0.240455630998581
ARHGAP18	260.226708994172	-1.43927014704754	0.127479106220416	-11.2902434737736	1.46629932696506e-29	6.38539165252587e-27
ARHGAP19	526.413159625786	0.131563831860761	0.0631265269190059	2.08412910201067	0.037148425536545	0.0671199419400446
ARHGAP20	149.895321838103	-0.458552071111029	0.161958508185398	-2.83129349762912	0.00463601588087281	0.0105260891796611
ARHGAP21	5342.28613378445	0.101618749443159	0.0703443244196697	1.44459059464283	0.148572916180793	0.225678913285298
ARHGAP22	459.155329910927	-0.204518457882384	0.133748853364608	-1.5291230746095	0.126233936045549	0.195930509956817
ARHGAP23	1978.01157725497	-0.213963594811437	0.102348959382362	-2.09053024185715	0.0365701947038938	0.0662040771669041
ARHGAP24	453.708213941228	0.140524696254792	0.109754494745775	1.28035481900117	0.200420376225441	0.291137596529317
ARHGAP25	300.133250112168	-0.824130548289687	0.106269423329577	-7.75510511366742	8.82703320398804e-15	1.96615859595117e-13
ARHGAP26	849.715545958222	-0.109064265622061	0.101683300516962	-1.07258778056548	0.283456109706532	0.390290326964346
ARHGAP27	369.462887282651	-0.328900416407869	0.0929497728906469	-3.53847466410501	0.000402445900262019	0.00115654240579575
ARHGAP28	50.3932715450699	0.45261520299019	0.176146004908443	2.56954566313014	0.0101831970269451	0.021186006624163
ARHGAP29	392.963347665088	-0.521931852600127	0.129419870069497	-4.03285718274834	5.51027705637935e-05	0.000191333154870539
ARHGAP30	487.196629638214	-0.739366516143996	0.123527269274557	-5.98545179931605	2.15790021321697e-09	1.78360793704829e-08
ARHGAP31	2454.90635839737	0.46299308180676	0.0839303600696141	5.51639575265424	3.46022584277777e-08	2.26840907082875e-07
ARHGAP32	1967.26882324965	0.770582182186776	0.0805555605020797	9.56584719147826	1.11286246075492e-21	9.81433907697435e-20
ARHGAP33	1403.6238370528	0.506621472312513	0.0851727914150117	5.94816095487533	2.71171879357810e-09	2.20489775915048e-08
ARHGAP36	339.498896380179	0.195389689168947	0.243823216175437	0.801358017639958	0.422924412178197	0.544150831354176
ARHGAP39	721.163344683543	0.146811445404993	0.074763348502708	1.9636820493624	0.049566975583231	0.0866511406872084
ARHGAP4	643.329900079356	-0.400120281676945	0.119718342716252	-3.34218025908762	0.000831230603553114	0.0022223161129287
ARHGAP42	287.732245980812	-0.0121653438293701	0.108745196297223	-0.111870172141855	0.910926347294681	0.982346843842933
ARHGAP5	3168.66030248346	0.0893457471951352	0.0818175922393438	1.09201144582413	0.274828070297422	0.380534178040406
ARHGAP6	269.3640970891	-0.294911109941742	0.128261943283327	-2.29928771069914	0.0214886072051667	0.0412745594194047
ARHGAP8	10.1465977157292	-0.130617363319485	0.176926161098173	-0.738259183993758	0.460356964288691	0.582615707269641
ARHGAP9	187.913149187457	-0.675878927128816	0.120734937477109	-5.59803931862689	2.16789592113769e-08	1.47374577966423e-07
ARHGDIA	5564.17731244339	-0.0161553574980663	0.0664311870122322	-0.243189354648918	0.807858713124517	0.90593592167991
ARHGDIB	1858.72022010856	-0.74143776477478	0.102493359145044	-7.23400785143094	4.68944645260705e-13	7.62915787657023e-12
ARHGDIG	352.58977161104	0.946097135163629	0.207039081215496	4.56965481883533	4.88528168977515e-06	2.09169903632948e-05
ARHGEF1	1516.05904095814	-0.0742527886392041	0.088862969991993	-0.835587519142053	0.403386992502242	0.523087989612023
ARHGEF10	936.360353373321	-0.512276622808507	0.0786486956707678	-6.51347893870935	7.34299054562079e-11	8.07190556876194e-10
ARHGEF10L	2768.32133874721	0.343469386118525	0.0856613455958092	4.00961931813651	6.08167158918372e-05	0.000208829773208581
ARHGEF11	1510.48508236031	0.298074448102924	0.0535982485513538	5.56127217137201	2.67815139879283e-08	1.79742323562232e-07
ARHGEF12	4057.64973896586	0.0301187453811393	0.0657779345871066	0.457885240243511	0.647034891411733	0.76622288312377
ARHGEF15	93.3842041183852	-0.254736778695949	0.124544206700567	-2.04535229252691	0.0408201387330923	0.0729358731122084
ARHGEF16	17.7919450157367	-0.54408021238905	0.182718596435014	-2.97769478862301	0.00290425033589199	0.00687941651027406
ARHGEF17	2455.67722297511	0.522336559583099	0.0869794292657558	6.00528842270463	1.90992077063869e-09	1.59282652202602e-08
ARHGEF18	1307.90768957952	0.0538112332319778	0.036140621724878	1.48894044052751	0.136503053154254	0.209513425137479
ARHGEF19	38.3720270632303	-0.540536808588896	0.14447947039736	-3.74127069473791	0.000183092184664154	0.000567594509162455
ARHGEF2	2757.17818794588	0.0954834160168139	0.0660390052026032	1.44586393637938	0.148215368828006	0.225223572310763
ARHGEF3	921.610523806201	-0.353879997181684	0.0835452182423509	-4.23578996652012	2.2774958871196e-05	8.56257616511593e-05
ARHGEF33	15.913821881206	0.368326408298953	0.11705025139367	3.14673743894984	0.00165103148243151	0.00412704932571376
ARHGEF35	11.3272664272845	-0.689404709700816	0.199730312674683	-3.45167791743112	0.000557112320245455	0.00155270243891488
ARHGEF37	728.353261601262	-0.152474447454794	0.124055574289834	-1.2290817911863	0.219041141465819	0.313928365848136
ARHGEF38	0	NA	NA	NA	NA	NA
ARHGEF4	3024.14289469336	0.403358950058641	0.0948775808192033	4.25136208760712	2.12474331971018e-05	8.02699114191729e-05
ARHGEF5	16.3173875210041	-0.6474395220213	0.224935756025993	-2.87833083303342	0.00399785634520445	0.00918332104941637
ARHGEF6	4156.85647989215	0.117352683416829	0.0740375416792742	1.58504294922694	0.112956576333841	0.177671186566585
ARHGEF7	2900.57000615123	0.505893847196527	0.0790219904563976	6.40193754010369	1.53417432075922e-10	1.59557404010658e-09
ARHGEF9	1879.55266492034	0.3785535985678	0.0768672986640109	4.92476781605749	8.44605798066737e-07	4.24371410268644e-06
ARID1A	2988.76204644435	0.172336152643056	0.0544886831303815	3.16278799086936	0.00156266087988198	0.00392275380588611
ARID1B	1466.32376559604	0.205627964964696	0.0577474229767704	3.5608162990652	0.00036970367238883	0.00107193165350466
ARID2	641.384941025651	0.189819032582032	0.0631380308815626	3.00641356614532	0.00264349194748943	0.00631857469420763
ARID3A	46.6140129587572	-0.107909193702781	0.09785335984695	-1.10276431868624	0.270129527059976	0.375067641404783
ARID3B	88.5890040259744	0.0662024240050098	0.0678732999532989	0.975382426529449	0.329370597446598	0.441440857119667
ARID3C	0.633824795535992	0.938860253311659	0.335023191938607	2.80237391291915	0.00507280413440108	0.0114088336694527
ARID4A	708.63406169568	0.314334735478736	0.0651952663014104	4.82143494936435	1.42529201179039e-06	6.85392087584374e-06
ARID4B	1025.62526045429	0.065989954084761	0.0479982800235381	1.37483997452408	0.169181061984135	0.252128681608105
ARID5A	700.360832627053	-0.48849514877587	0.133176178358605	-3.6680369927758	0.000244419826762896	0.000737431063848149
ARID5B	1141.13730636226	0.0639950966610156	0.0926122202983446	0.691000566176465	0.489565185245499	0.613278783647866
ARIH1	1184.36270163251	0.0998386913790197	0.0418431721349665	2.38602109460026	0.0170317740894403	0.0335370051528786
ARIH2	1733.88210590283	0.14487131555023	0.0437938310764121	3.30803019487965	0.000939546789164098	0.00247757636595972
ARL1	1219.12474950889	-0.273316588009939	0.0503221791840966	-5.43133450183166	5.59341751810774e-08	3.54984394099381e-07
ARL10	118.697720005074	0.443359385824569	0.108484587949044	4.08684214234023	4.37284430973772e-05	0.00015532483250736
ARL11	55.4057889923961	-0.92248093520393	0.124727675648907	-7.39596028230816	1.40389967668893e-13	2.4851957037845e-12
ARL13A	0.221719712858517	0.148467835505344	0.458719205406211	0.32365733493515	0.746197475310383	0.855644454538999
ARL13B	277.867210884661	-0.507209909670612	0.0679376280023938	-7.46581717060743	8.27842263354858e-14	1.53909894007361e-12
ARL14	0.00997247288730896	0.0125173692359183	2.90030575372639	0.00431587918612914	0.996556437321534	0.997580121386579
ARL15	181.49665837884	-0.261814799457768	0.104538678804488	-2.50447779187475	0.0122632303724632	0.0249866868674082
ARL16	604.106456091113	0.059639685353244	0.0585026137020801	1.01943625385619	0.307995902063185	0.417966866119724
ARL17A	60.114425689645	0.108979569185684	0.0804601882762379	1.35445332058549	0.175591796225314	0.260012468350659
ARL17B	2.32498652193688	0.00132824834227337	0.187448157900636	0.00708595036168589	0.994346276920727	0.997580121386579
ARL2	1663.8973964245	-0.111272623889175	0.0881097329617216	-1.26288685879364	0.206629843271613	0.298754869834105
ARL2BP	2023.34750863303	-0.199973232109169	0.0496144823742915	-4.03054153826641	5.56484931646166e-05	0.000192987389996153
ARL3	1583.13698538605	0.411769802484955	0.0904744510397824	4.5512274211412	5.33338609532257e-06	2.26317646413753e-05
ARL4A	586.090835895561	-0.417635844547897	0.12067437859808	-3.4608493484676	0.000538474060031601	0.00150399246632501
ARL4C	1223.08447696791	-0.95706792902804	0.181416443167996	-5.27553022380542	1.32372791563481e-07	7.77560490528102e-07
ARL4D	141.531243802986	0.108411733566392	0.112301131307646	0.965366352983579	0.334361348111822	0.447017667556817
ARL5A	993.385950983689	-0.186560632938184	0.0509003446746364	-3.665213548763	0.000247132284241302	0.000743992619688443
ARL5B	158.356045358946	0.366942950739751	0.133901777009373	2.74038895476394	0.00613665147146597	0.0135145013761437
ARL5C	1.07530947136744	1.00119988477635	0.282933014300489	3.53864637271714	0.000402184237215537	0.00115596088826586
ARL6	78.5487186492421	-0.178826805129078	0.0750823204489766	-2.38174318614197	0.0172309094265856	0.0338846155508176
ARL6IP1	7515.9497899472	-0.13757658098301	0.0560570925329418	-2.45422255715747	0.0141189568229553	0.0283455365141532
ARL6IP4	1901.48516246561	-0.0506037524289995	0.0823870381523106	-0.61421982831143	0.539070072325196	0.663036457757041
ARL6IP5	3333.99021063754	-0.29253589284681	0.0558483680479028	-5.2380383361586	1.62292356208614e-07	9.38598819734683e-07
ARL6IP6	542.813863924455	0.124298745135554	0.0574354011010322	2.16414863921478	0.0304529436058498	0.0563440166012923
ARL8A	2907.34404355602	-0.0202571781619796	0.0595934131517015	-0.33992310711274	0.733914434743897	0.845040014955902
ARL8B	2577.38052088768	-0.125257084736481	0.0560867091959659	-2.2332756999316	0.0255307689627516	0.0480907207001091
ARL9	5.85416267148794	-2.3697605713099	0.356039338372098	-6.65589533489485	2.81580590548017e-11	3.32404949108471e-10
ARMC1	689.202594104918	0.0804311311673168	0.0600651022033614	1.33906591709446	0.180549214814224	0.266180347710228
ARMC10	557.12853784884	-0.317691858231384	0.046039881087107	-6.90036226701616	5.18700911230131e-12	7.02535146620934e-11
ARMC2	46.8912422065848	-0.971667754539208	0.123140496536683	-7.89072467520667	3.00436807722292e-15	7.18467899694168e-14
ARMC3	56.6622684808621	-2.95622597594779	0.361417373285035	-8.17953478295117	2.84941814950571e-16	8.33861257265259e-15
ARMC4	29.5888442086589	-1.53314603276549	0.245461297569012	-6.24597868563961	4.21154608674526e-10	4.00600455005686e-09
ARMC5	611.677561231397	0.279075058879575	0.0731697385379453	3.81407757436292	0.000136692529460055	0.000435601275208711
ARMC6	866.628546764886	0.0663958747986393	0.0579650021241988	1.14544763849704	0.252023774027805	0.353894645567554
ARMC7	302.51621627876	-0.0760706755731111	0.0499701027243248	-1.52232377813546	0.127927972922831	0.198196835633226
ARMC8	800.263123323978	0.117258482583523	0.0415486923151217	2.82219429902121	0.00476962704923835	0.0108017698337968
ARMC9	202.250422872344	-0.485244668819864	0.0838669085186329	-5.7858895408319	7.21296017865374e-09	5.40278992628599e-08
ARMCX1	804.754963548306	0.167220157038108	0.0499120370778756	3.35029717935979	0.000807249025800288	0.00216711894116358
ARMCX2	935.716443612252	-0.300186592406663	0.0977936219599435	-3.06959274429595	0.00214350841450533	0.0052286581975856
ARMCX3	2605.81175120476	0.0747471705050887	0.0587024858640671	1.27332206472781	0.202903780128425	0.294021908899852
ARMCX5	187.126002963878	0.0586713100288142	0.0673559703081865	0.871063244436452	0.3837196217349	0.501286643046665
ARMCX6	288.499370436496	0.0207605395834865	0.0565095332389062	0.367381190280175	0.713334700141084	0.827454666453382
ARMS2	0.355379667902991	-0.250132286117792	0.417583978323724	-0.598998762169659	0.549173710015621	0.672408318143262
ARNT	788.533920887726	-0.0257533872905626	0.0442751746147843	-0.581666532422057	0.560791318671959	0.683754945318516
ARNT2	7700.3781039696	0.259397000189091	0.0810153548399931	3.20182514415205	0.00136559863558711	0.00347461062762309
ARNTL	376.28170810548	-0.360761546835391	0.102920168224061	-3.50525609373274	0.000456168262729413	0.00129489068461932
ARNTL2	46.1444309221486	-1.17090281908539	0.194170150259796	-6.03029259398903	1.63663091333497e-09	1.38506020412065e-08
ARPC1A	2026.16081186498	-0.193382129715131	0.0455822229806662	-4.24249009964157	2.21053295998514e-05	8.3317128969465e-05
ARPC1B	1396.06022501625	-0.686544581523517	0.108789760533231	-6.31074632537505	2.77693043938729e-10	2.73197408516291e-09
ARPC2	3061.07118637159	-0.217462352143432	0.0422983620612426	-5.14115302688493	2.73057537849689e-07	1.5106135148142e-06
ARPC3	2492.25387393638	-0.366742055029269	0.050415231944577	-7.27442958970098	3.47887266917577e-13	5.76068210044483e-12
ARPC4	2943.37100668619	-0.212250192042336	0.0556037605910174	-3.81719131559286	0.000134979503684893	0.0004306352147354
ARPC5	2347.78710682909	-0.487484371226151	0.0673275671975281	-7.2404869434232	4.47076630480576e-13	7.30387554741528e-12
ARPC5L	659.208112652522	0.0472843361352918	0.0588742756303592	0.803140856155334	0.421893325486687	0.543108726090815
ARPM1	15.3637132513074	0.0215660942254804	0.16634123122765	0.129649721036185	0.896843563497673	0.97264200696466
ARPP19	5838.76616254044	0.191623167674185	0.0504919142266967	3.79512582576771	0.000147568596883277	0.000466598305200367
ARPP21	691.846260567712	1.23364031975584	0.14336819135582	8.60470030408704	7.65164203263161e-18	3.16625272220786e-16
ARR3	0.0252456432062698	-0.132642824419657	2.90030575372639	-0.0457340831218344	0.96352219781816	0.997580121386579
ARRB1	470.903708182512	0.193822414744902	0.132286437852542	1.46517222695915	0.142873934881669	0.217990683485497
ARRB2	1728.1736363764	-0.0793771219621488	0.0719876445142343	-1.1026492462391	0.270179515382496	0.375094335099112
ARRDC1	446.174856381972	0.112109903902917	0.0558666038642453	2.00674277919849	0.0447770584379633	0.0792000062579095
ARRDC2	1027.04012753835	-0.184595694905984	0.151069092750154	-1.22192893030263	0.221734503992414	0.317298493598543
ARRDC3	1087.7943973505	-0.129650221325425	0.0814313914303545	-1.59214056211123	0.111353124861062	0.175545773966035
ARRDC4	1247.49358336157	-1.01534140800964	0.129193021647273	-7.85910411463056	3.86890561458342e-15	9.07400366164029e-14
ARRDC5	3.71602891044244	-0.535686296585308	0.171783032740041	-3.11838886554041	0.00181842706270749	0.00450498574511165
ARSA	559.450095984911	-0.424009656101739	0.0915339159808785	-4.63226828611064	3.61681035604755e-06	1.59303127320603e-05
ARSB	451.804263878832	0.013179384146042	0.0593646710258648	0.222007195833695	0.824308281642949	0.919165998911954
ARSD	393.487743161655	-1.40124686395063	0.147809137593672	-9.48010986846204	2.54015477988327e-21	2.05425795269398e-19
ARSE	56.6282964811204	-1.13602525328091	0.165057297827598	-6.88261148239252	5.87651422779943e-12	7.88253697865181e-11
ARSF	54.8216235673061	-1.95709090166673	0.321725002978343	-6.08311720739489	1.1786811639375e-09	1.02809026317607e-08
ARSG	137.960511753825	-0.0529396868041761	0.133866394734009	-0.395466591218556	0.692498572778386	0.80843349406713
ARSH	0.0154660613673919	-0.0163361693576751	2.90030575372639	-0.00563256799276627	0.995505884724162	0.997580121386579
ARSI	74.4215476037121	-0.913339001714228	0.205973862080603	-4.43424710537696	9.23946046377999e-06	3.74069556375305e-05
ARSJ	116.27456365481	-1.32164182836126	0.229528831556955	-5.75806455074169	8.50838212748272e-09	6.27550050011063e-08
ARSK	158.224371050311	-0.467979426663056	0.0748425399154623	-6.25285335307511	4.03020540303034e-10	3.854205265214e-09
ART1	0.488846449959087	0.633083897490084	0.396341137173804	1.59732068693254	0.110194241822916	0.173986209747945
ART3	41.3312418922501	-0.832331759854791	0.229207543564777	-3.63134540386348	0.00028194753345136	0.000839596245525898
ART4	0.172122982813313	0.261205442111863	0.906757593660611	0.288065348377583	0.773296716820131	0.877735583747418
ART5	2.17750566397146	-0.399346159089841	0.229941325190179	-1.73673070188471	0.0824347158889299	0.135245977149995
ARTN	11.80045307165	-0.212542620855306	0.176072874428254	-1.20712870477907	0.227382581808314	0.32421439164855
ARV1	353.354847856967	-0.128284255590713	0.0457983142676651	-2.80106937650509	0.00509335678805558	0.0114510928364521
ARVCF	1069.0981344612	0.207774554203334	0.0805327268896188	2.58000147552581	0.00987998930050643	0.0206521869870088
ARX	75.0097969535014	-0.477988863173752	0.246940417384201	-1.93564450986602	0.052911254998713	0.0917477124982018
AS3MT	251.790003435035	-0.141886631211676	0.136432075773943	-1.03998000768361	0.298349189068957	0.407622089651711
ASAH1	4991.11030067181	-0.360383650300054	0.0745940320735614	-4.83126652739001	1.35667244536811e-06	6.54008062335505e-06
ASAH2	3.41577756715184	0.539674457767684	0.21773083310439	2.47863129935732	0.0131887559390952	0.0266675851491821
ASAH2B	6.35397957963148	0.472974320414187	0.242679720148396	1.94896516332295	0.0512995851276031	0.0893262676795304
ASAM	11.1681307353769	0.185875090676813	0.240353162479484	0.773341564385197	0.43932026332139	0.561279130402767
ASAP1	1893.48216395837	0.0819321157412376	0.0716348094081121	1.1437472426912	0.252728474862018	0.354620444568807
ASAP1IT1	0.0196540780244776	-0.0451897079512691	2.90030575372639	-0.0155810151716619	0.987568651543934	0.997580121386579
ASAP2	898.973994600581	-0.180695386386164	0.0793587378340395	-2.27694380376925	0.0227895816467205	0.0434820309637379
ASAP3	1571.13775536644	-0.0835723219382464	0.0768061449688892	-1.08809421397335	0.276553517777437	0.382569952550376
ASB1	1017.88089060797	0.459308326931828	0.0646562764257341	7.10384748895032	1.21330745228728e-12	1.82464214854005e-11
ASB10	0.0731354659436738	-0.362578632480797	2.90030575372639	-0.125013934139512	0.900512519034274	0.975380070911304
ASB11	0.0792837690691598	-0.332829179879193	1.8346476277849	-0.181413136145954	0.856043308797058	0.943201090420864
ASB12	1.07945355615671	-0.321429561465967	0.3502384063602	-0.917745043458756	0.358752359890986	0.474232467056112
ASB13	842.473138547738	0.675996017319198	0.0820337558773283	8.24046162570039	1.71547481157063e-16	5.29028545530246e-15
ASB14	10.7296749896787	0.23432082744377	0.0837491555449476	2.79788883743444	0.00514378122282436	0.0115485012284013
ASB15	0.00486125918343224	-0.0172286700452833	2.90030575372639	-0.00594029440625266	0.995260358681341	0.997580121386579
ASB16	12.9116710046977	0.191433310327926	0.108911724386694	1.75769240094149	0.0787998615325146	0.130043124578214
ASB17	0	NA	NA	NA	NA	NA
ASB18	0.00496815227201238	-0.0172286700452833	2.90030575372639	-0.00594029440625266	0.995260358681341	0.997580121386579
ASB2	20.5711548074293	-0.366891231995117	0.226541655679205	-1.61953099042701	0.105333064143657	0.167409395756331
ASB3	906.222757173308	0.185814452840695	0.0736909501504628	2.52153693854262	0.0116843407138263	0.0239461409581991
ASB4	4.2885162664083	0.174182081635422	0.231727579794433	0.751667461378311	0.45225106284971	0.574450809107198
ASB5	23.3269210850969	-1.51711122040111	0.336019229764595	-4.5149535681751	6.33306399579673e-06	2.654439081249e-05
ASB6	989.273065986126	-0.0800475878156925	0.0434218575059489	-1.84348603246017	0.065258079193036	0.110186256906547
ASB7	361.77505570515	-0.0498536182853675	0.0452504605121889	-1.10172620833193	0.270580719398123	0.375480115419681
ASB8	800.904875662771	0.134385414198907	0.0378911372037617	3.54661865850692	0.000390208973152638	0.00112535852127033
ASB9	9.51575094747626	-0.918222623693463	0.159337007569144	-5.76277060616319	8.27442242015232e-09	6.12722237723286e-08
ASCC1	917.161667409087	0.239524999626893	0.0737367295346479	3.24838111397853	0.00116063698989092	0.0030084871569323
ASCC2	1069.26039829582	-0.124689476051132	0.0529316313074578	-2.35567038028477	0.0184893158472553	0.0361259915652137
ASCC3	926.910408036719	-0.145402611781299	0.0815262341763479	-1.78350702997983	0.0745038046484536	0.123836523768717
ASCL1	1522.44235613151	0.162118199420464	0.127004866404911	1.27647234322192	0.201788597342148	0.29272049288994
ASCL2	13.5345458213945	-1.28248105762909	0.157178605182068	-8.15938693528633	3.36729314687898e-16	9.66547031409002e-15
ASCL3	0.0200332236567184	0.0134098699235255	2.90030575372639	0.0046236055996152	0.996310909620892	0.997580121386579
ASCL4	0.718023106442463	0.334096649956685	0.358000140010398	0.933230500823216	0.350700969832847	0.465293526347324
ASF1A	742.667767260605	0.186476777357121	0.0644976683545817	2.89121734342315	0.00383752623547753	0.00884863667715668
ASF1B	139.34820041669	-1.24653966705312	0.20700798093972	-6.02169859052973	1.72596082603826e-09	1.45120692405029e-08
ASFMR1	0.363821828339865	0.219561557923433	0.375455827194676	0.584786656699268	0.558691177467124	0.681919529611364
ASGR1	111.834731588101	0.534551164072047	0.126042484311101	4.24103957482031	2.22486899891102e-05	8.37926507995667e-05
ASGR2	9.7048623644909	-0.907285472037899	0.197112222901898	-4.60288793196479	4.16672463757604e-06	1.80948001752132e-05
ASH1L	2529.54285639344	0.223078239927584	0.0717990397901108	3.10698082564483	0.00189008657662522	0.0046630110605602
ASH2L	1012.66566737149	-0.0807348531228123	0.0372030191161425	-2.17011562612082	0.0299980877064903	0.0555921583530945
ASIP	8.93648324651136	-0.426846874106428	0.239573602059637	-1.78169410334355	0.0747991290150347	0.124208488072167
ASL	315.606260342125	-0.529615294468996	0.0855935649566552	-6.18755971593419	6.11027032526717e-10	5.58841711118991e-09
ASMT	0.581996708700825	0.682734817559696	0.396838694470541	1.72043408839099	0.0853535650696992	0.139371731166927
ASMTL	1132.12288799647	0.260534955390386	0.0686282213754155	3.79632387622561	0.000146857611371624	0.000464500948658383
ASNA1	1821.60194372459	-0.142422408902027	0.0440046288977201	-3.23653243919086	0.00120991473842447	0.00312003681554551
ASNS	895.804490696019	0.0640650143758355	0.0905367124504095	0.707613659054898	0.47918520821858	0.60242015791654
ASNSD1	1033.61420916115	0.0798353128284827	0.0370248849363795	2.15626093006542	0.0310632962036258	0.057326355743648
ASPA	139.847687218362	-0.217064866685278	0.16200495822531	-1.33986557611028	0.18028905143067	0.265897359998771
ASPDH	52.964461546161	0.116198258335688	0.187027873254148	0.621288454570561	0.534409848744348	0.658384826297556
ASPG	0.291189650407168	0.0077678315227678	0.590487185472482	0.0131549535940434	0.989504168352291	0.997580121386579
ASPH	2923.17266780128	0.0497313152090534	0.0768578454468215	0.647055806989318	0.517595825697669	0.641975228622657
ASPHD1	405.885706336321	0.271852666179754	0.154647316857819	1.7578880235581	0.0787665640160589	0.129999181359386
ASPHD2	213.85496107664	0.0441567392269694	0.106373823433425	0.415109072906508	0.678062057901436	0.795104356446603
ASPM	181.821730057884	-1.20938273668901	0.268006996336607	-4.51250434958819	6.40666204500929e-06	2.68355562555837e-05
ASPN	28.5295149390301	-1.59211755981783	0.222668511814688	-7.15016931151383	8.66709325426144e-13	1.34384763345708e-11
ASPRV1	153.17618338087	0.193397942736118	0.0777444111315603	2.48761216299969	0.0128603893700906	0.0260643850099692
ASPSCR1	557.277246275657	0.0845962971902201	0.0787434082690043	1.07432862064112	0.282675421778377	0.389407970770467
ASRGL1	1148.89340259464	0.0703642441220452	0.0921258928804828	0.763783578340244	0.444996224481182	0.566898255777387
ASS1	300.98934700728	-0.573465737666452	0.173282870834231	-3.30941964953392	0.000934895958894706	0.00246865224750817
ASTE1	166.401923650145	-0.253949232512988	0.0483046318342518	-5.25724393023772	1.46230297561265e-07	8.52026457240377e-07
ASTL	0.11744077228341	0.226997134069687	0.92527557841952	0.245329217980036	0.806201530193124	0.904598032438917
ASTN1	4081.33567629708	0.271682031918619	0.090435207696834	3.00416219343885	0.00266313312241711	0.00636318064924721
ASTN2	1991.67427090057	-0.082201947589571	0.108023185137457	-0.760965782345436	0.446677505391369	0.568668402905335
ASXL1	1714.52898572212	0.0997680463322342	0.0495851134400122	2.01205643006006	0.0442139888300269	0.0783391492997476
ASXL2	406.957724130465	-0.0362664174305059	0.136571893248879	-0.265548178089737	0.790587200783765	0.891749785478071
ASXL3	168.669637989382	0.669740222223041	0.141001949224064	4.74986499058086	2.03552498240048e-06	9.45480979670766e-06
ASZ1	0	NA	NA	NA	NA	NA
ATAD1	1021.93643241004	0.31456923767373	0.0707200726683553	4.44808985348355	8.663728934066e-06	3.52800775009346e-05
ATAD2	596.309914944301	-0.429739284023527	0.11890734962411	-3.61406830933512	0.000301429589413296	0.000892022881516117
ATAD2B	290.12410457654	0.228711659427955	0.0667250135169418	3.42767498083585	0.000608773832745739	0.0016803571732353
ATAD3A	806.182835026699	0.0622038330491489	0.0739001439496448	0.841728171619454	0.399940125532798	0.519622065300882
ATAD3B	323.897294465289	0.161460410070722	0.120804002123971	1.33654851852531	0.181370053096353	0.267188385098104
ATAD3C	39.3153215992323	-0.632705052691925	0.195106048818199	-3.24287768895101	0.00118328997153278	0.00306150558146474
ATAD5	66.9127318047038	-0.358212625435559	0.141754536684072	-2.52699231936334	0.0115044018662602	0.0236146174168943
ATCAY	2844.58445648933	1.06544428926763	0.150977013705375	7.05699671174313	1.70139648287019e-12	2.48950581465015e-11
ATE1	194.533048866296	0.445388747218272	0.112865476995413	3.94619115671991	7.94042286085739e-05	0.000266549847671565
ATF1	221.632207581079	-0.0197076536066779	0.0489159321082759	-0.402888236148803	0.687030445828091	0.803397335404662
ATF2	496.089800809273	0.122844159406929	0.094253404768794	1.30333922374761	0.192458975636571	0.281134035865379
ATF3	456.933760211646	-0.948727408921608	0.181536463998392	-5.22609831669969	1.73124328086687e-07	9.96218823268242e-07
ATF4	4824.90326412755	0.0545126332387808	0.0656861826574585	0.829894979938998	0.406598163427459	0.526306582001804
ATF5	499.145032097802	-0.535982221872763	0.104388092720523	-5.13451494230994	2.8287262063319e-07	1.55783763100901e-06
ATF6	1051.26620721222	-0.116542103848883	0.0703797877996049	-1.65590302972663	0.097741457978768	0.156866025692209
ATF6B	1808.14010846381	-0.010402595121275	0.0432895925827691	-0.240302449171481	0.810095796469365	0.907869994433208
ATF7	1154.11517657606	0.0141526558890896	0.05923420207692	0.238927096050206	0.811162114335387	0.908908221708445
ATF7IP	1127.98434912882	0.140477474128506	0.114734103933208	1.22437417744844	0.220811105951925	0.316093165993611
ATF7IP2	33.6998455874496	-0.564012329211403	0.142424781461291	-3.96007157900882	7.4927301403082e-05	0.000252565393349372
ATG10	69.148994369399	-0.369464151319667	0.0652835694054451	-5.65937424507384	1.51925926717306e-08	1.06512097543896e-07
ATG12	569.036977931963	0.0438629223551667	0.0366704709063054	1.19613741713976	0.231642938134715	0.329493567672281
ATG16L1	443.564432137696	-0.0131111000178237	0.0496794177571842	-0.263914123992077	0.791846092012201	0.892723596963389
ATG16L2	457.32390667655	0.26561346889647	0.102705584903667	2.58616383077514	0.00970507888086372	0.0203301792119555
ATG2A	1016.7348491332	0.162398379867211	0.0434301961465553	3.73929648669322	0.000184535976243227	0.0005716157306072
ATG2B	836.932110814033	0.233935455988218	0.058228655468607	4.01753147321666	5.88109824457287e-05	0.000202835966708061
ATG3	900.18090455466	-0.100308262897362	0.0413468260760686	-2.42602086827217	0.0152653924689788	0.0304121945436365
ATG4A	189.877414509618	-0.20811181868717	0.0462630045276956	-4.49845012903523	6.84506487984209e-06	2.85003876325833e-05
ATG4B	1422.46213604082	0.109619618050059	0.0623746856850345	1.75743760222843	0.0788432487625279	0.130103709963735
ATG4C	301.828794498395	-0.465502527123838	0.0590074644394973	-7.88887527274005	3.04922081152834e-15	7.2651972636537e-14
ATG4D	350.861232897461	0.151511169939242	0.0689565166633802	2.19719871696626	0.0280062572026793	0.0522987403353665
ATG5	528.693072391049	-0.181201308181652	0.0448556774546749	-4.03965157732261	5.35306638534159e-05	0.00018650565579247
ATG7	813.327286852339	-0.206595157828596	0.048572041945371	-4.25337600714736	2.10571556695171e-05	7.95954777079247e-05
ATG9A	2246.02896945279	0.125734319073885	0.0420710734200124	2.98861685364263	0.00280243314909602	0.00666090513120505
ATG9B	32.2269534785393	-1.27222728412755	0.208763339670474	-6.09411253017755	1.10046231514307e-09	9.64388962326371e-09
ATHL1	341.771181891049	-0.0983136925110763	0.161105412900403	-0.610244502286554	0.541699854152015	0.66555696636341
ATIC	1408.9279642909	0.0321337198595695	0.0609455195956419	0.527253193881496	0.598017773363264	0.720579066636786
ATL1	738.083558781805	0.355655497719077	0.0971400179827577	3.66126654189219	0.000250971490764043	0.000754501674377787
ATL2	451.434145169046	0.0312833570373528	0.0564055745118906	0.554614633536941	0.579158277577958	0.702022295934581
ATL3	217.352163106266	-0.452069529901351	0.109507132282583	-4.12821996593598	3.65582309917266e-05	0.000132070421136006
ATM	1464.87799301447	0.185382361122851	0.0692025412066177	2.67883748039477	0.00738782419253667	0.0159261910753832
ATMIN	1754.91814146878	0.0728494859622586	0.0498859251623557	1.46032143786383	0.144201752901744	0.219810117632958
ATN1	9148.02485003697	0.172871072314563	0.0721772651755579	2.39509036389902	0.0166162695931945	0.0328316194618167
ATOH1	0.092764781396874	-0.243590202456835	1.68267769174395	-0.144763434882395	0.884897652788328	0.964568543615717
ATOH7	11.0170128768816	0.957918951747023	0.209044877386547	4.58236032244754	4.59756797712183e-06	1.9776340735843e-05
ATOH8	1116.20606971188	0.938271971421992	0.149475729934409	6.27708573046414	3.44977888951635e-10	3.33444625920697e-09
ATOX1	806.350179163716	-0.198238642564882	0.0833143224228047	-2.37940652699374	0.0173405402816308	0.0340864478153287
ATP10A	495.688723830452	0.405051787425955	0.126448799969668	3.20328692342764	0.0013586854084612	0.0034588268823026
ATP10B	271.360873688781	-0.378547137819667	0.177505978348384	-2.13258810402829	0.0329585300352274	0.0604120897570377
ATP10D	399.917535341513	-0.470384611016578	0.0895939792476475	-5.25018103857608	1.51949798844265e-07	8.81924234507066e-07
ATP11A	1330.9061756214	-0.1615016205593	0.0868432483308114	-1.85969115231725	0.0629292345271398	0.106679201612069
ATP11B	510.079509577932	-0.0886769088947262	0.0738095515360423	-1.20142863693494	0.229584973220748	0.326852529442832
ATP11C	238.730527554481	-0.0967024511713369	0.07106971927871	-1.36067022851328	0.173617927011418	0.257547839923907
ATP12A	1.02012880664951	-0.782800216050891	0.518179498925053	-1.51067384501854	0.13087156936593	0.202209412500477
ATP13A1	1528.83262251514	0.0165027868625969	0.0582724652473698	0.283200423948801	0.777023203387474	0.88068052070376
ATP13A2	2025.22205690721	0.291107122553442	0.0597163063212789	4.87483470573784	1.08899600132044e-06	5.35432191365674e-06
ATP13A3	1078.97343482923	-0.149940241174058	0.0700222473943733	-2.14132289027482	0.0322480084421521	0.0592572213034469
ATP13A4	778.949816601165	0.23645241461094	0.133618785917917	1.76960457308895	0.0767930365162995	0.127194381040425
ATP13A5	45.1808606998761	0.258738684429971	0.18886617738773	1.36995775532004	0.170700089099114	0.25404285318416
ATP1A1	8178.82439697805	-0.26915186265957	0.0809583386825999	-3.32457245342928	0.000885542206253419	0.00234979136826128
ATP1A2	25609.0543124473	-0.0801345571851095	0.189061457036232	-0.423854541487809	0.671671898472457	0.788987783343068
ATP1A3	5412.34797940938	1.03954335310823	0.164378500051754	6.32408345848719	2.54740024370304e-10	2.52923233569905e-09
ATP1A4	7.66440117513904	1.31026385839041	0.280145737871678	4.67707939569148	2.90989614031203e-06	1.30647030119054e-05
ATP1B1	3471.1761751971	-0.122447941199262	0.140303126826978	-0.872738505324011	0.382805624782217	0.500327362326006
ATP1B2	16890.6644913009	-0.239757956125622	0.112339691713441	-2.13422302009874	0.0328245291848917	0.0601947754811384
ATP1B3	1604.03820531051	-0.242474022721266	0.0598987095936623	-4.04806755214175	5.1642243270728e-05	0.000180669057861513
ATP1B4	1.56795199347976	-0.385329015596597	0.491110864798181	-0.784606986357237	0.432684032604619	0.554657445110762
ATP2A1	17.2249924588951	0.252054956889885	0.160768606938133	1.56781203551064	0.116925005259413	0.183100462197168
ATP2A2	7534.30145004326	0.156226607459023	0.0736586925740195	2.12095276198435	0.0339257778715176	0.0619926317941007
ATP2A3	87.7472656112095	-0.935833164299789	0.163264726525378	-5.73199848011459	9.92541621781092e-09	7.23975906007241e-08
ATP2B1	1403.37372661121	-0.170613891885301	0.131775146347682	-1.29473498314428	0.1954116674846	0.284732229688002
ATP2B2	1651.50393068526	0.417854361821642	0.139330252012284	2.99902107250048	0.00270848573202974	0.00646203781579871
ATP2B3	181.238102938696	1.19463413783575	0.26533755881161	4.50231826653664	6.72162239100577e-06	2.80463327768577e-05
ATP2B4	5687.92624466203	-0.288277398654687	0.0955087377714602	-3.01833534167834	0.00254167481131441	0.00609689133200219
ATP2C1	2441.4859918767	-0.0282946976798765	0.0460448791743459	-0.614502593713853	0.538883259648921	0.662890351587823
ATP2C2	27.8800447167349	0.29844635681263	0.194930132264693	1.53104270409755	0.125758838804748	0.195306749001242
ATP4A	0.335992037094324	1.08802778077797	0.971789624749873	1.1196124686534	0.26287893987195	0.366462380237773
ATP4B	0.203607338238844	-0.702573300708492	0.722926033002754	-0.971846729312368	0.331126804604132	0.443245976767482
ATP5A1	9589.91490530899	0.124860188697587	0.0522881486576264	2.3879252163841	0.0169437891981447	0.0333873674524154
ATP5B	9991.49130147571	0.146489018658332	0.0603102026668184	2.42892598898408	0.0151436233278705	0.0301912048547663
ATP5C1	2363.52805150434	0.217504652853749	0.0677205252569501	3.21179807788669	0.0013190705165083	0.00337118861352567
ATP5D	1479.2876245986	0.0894220904770406	0.10237055151289	0.87351380993372	0.38238308229857	0.499808862633249
ATP5E	3434.82254914775	-0.248890336421781	0.0682438760368538	-3.64707210193297	0.000265245512829501	0.000793984801880966
ATP5EP2	33.1094669201536	-0.4265147770992	0.0951706331524852	-4.48157969502867	7.40925544558757e-06	3.06465171125853e-05
ATP5F1	2824.76903702574	-0.124868663190424	0.0409625467129264	-3.04836181367161	0.00230092709226879	0.00557982692899325
ATP5G1	933.598696826988	0.00821428416398432	0.0623666430682991	0.131709576784319	0.895214010335771	0.971314427514568
ATP5G2	3906.59328289832	0.178283026222606	0.0584874006655357	3.04822960490465	0.00230193970872196	0.00558158807203171
ATP5G3	2142.7764179531	-0.0187562855783701	0.0654640487732612	-0.286512764331667	0.774485418544303	0.878366063859673
ATP5H	1667.08594907382	-0.280850399727249	0.0584254475149621	-4.80698756574054	1.53221516507631e-06	7.31720089069796e-06
ATP5I	1472.73587406022	-0.0835736928460072	0.082081070637009	-1.01818473123479	0.308590174240928	0.418627440186516
ATP5J	1558.24923320902	-0.0096455489818314	0.0551833212335224	-0.174791019572994	0.861243845050448	0.946896967339834
ATP5J2	1610.73967822715	-0.29460242966438	0.072284579189324	-4.07559168177175	4.58974942595772e-05	0.000162319390876276
ATP5L	2134.31414746868	-0.0675983262246239	0.0531900506965219	-1.27088290647266	0.203770308381893	0.295080118163541
ATP5L2	0.238386720552309	-0.348295112511007	0.566142112401352	-0.615207921971529	0.538417416750894	0.662388889951195
ATP5O	2591.95692013754	-0.0367001527699799	0.0572408216390142	-0.641153493592863	0.521422961812916	0.645527124800466
ATP5S	180.626456931284	0.247011691065585	0.057640111696853	4.28541312280405	1.82399918134816e-05	6.98148940386403e-05
ATP5SL	693.864873377232	-0.110599266182494	0.0494378746322228	-2.23713634546918	0.0252774301348941	0.0476549732374817
ATP6AP1	3782.13510528051	-0.0521337677108669	0.049319237116408	-1.05706760199506	0.290480735916089	0.398638891916954
ATP6AP1L	77.7690039939977	0.354491553938957	0.0919626184998556	3.85473532313039	0.000115854899157134	0.000374898220915249
ATP6AP2	3414.62241553547	-0.267551066605204	0.0524222129958712	-5.10377283435701	3.32947914402742e-07	1.8065575867788e-06
ATP6V0A1	3885.0014714543	0.433370856375663	0.058356516632178	7.42626327591152	1.11708544202432e-13	2.01966560900316e-12
ATP6V0A2	566.936251382787	-0.040072646065604	0.0608996577363934	-0.658011022640883	0.510531048318214	0.634946725271009
ATP6V0A4	5.56620031793951	-0.982736664803076	0.356694870461715	-2.75511857944858	0.00586708675226424	0.012966268375284
ATP6V0B	2156.10558416412	-0.0839950439089528	0.0592502286372412	-1.41763240144121	0.156298115223613	0.235704910686183
ATP6V0C	3804.16607745885	0.213899283132777	0.0698550867309794	3.06204305430941	0.00219831830596844	0.00535230778055276
ATP6V0D1	2637.84961893204	0.171030152499991	0.0535439205347903	3.19420301673397	0.00140217472575363	0.00355745709514948
ATP6V0D2	1.2335457773556	-1.19947595285624	0.57604444459611	-2.08226286028546	0.0373184663179687	0.0673834452971289
ATP6V0E1	2381.66060195146	-0.326228709066675	0.0597042074580025	-5.46408239814844	4.65307378907368e-08	2.99598309048715e-07
ATP6V0E2	6856.62953783577	0.293212483379364	0.0799564453461407	3.667152561748	0.000245266473166973	0.000739517877788414
ATP6V1A	2393.07081178579	0.283880688395346	0.0826108702595264	3.43635997906232	0.000589587023845799	0.00163317951886791
ATP6V1B1	51.4405126393781	0.460671876939499	0.163453606548025	2.81836471319554	0.00482689473906189	0.010914976037164
ATP6V1B2	3643.09236648306	0.0498931292536772	0.0785883927204711	0.634866390907633	0.525515558558841	0.649603490601371
ATP6V1C1	1921.73204765433	0.209774042112733	0.0687393938499357	3.05172958857753	0.00227526972581495	0.00552516907003904
ATP6V1C2	30.789251171646	-0.0693549800596904	0.0816817722880148	-0.849087600782469	0.395832549313523	0.515073867413578
ATP6V1D	1444.46489638519	0.0481721644931312	0.0609733590540885	0.790052659726332	0.429497015288739	0.551333519592802
ATP6V1E1	2580.14551528304	0.036805465733648	0.0650994604263521	0.565372823255371	0.571820205502724	0.695076809496648
ATP6V1E2	76.9617637242409	-0.256252258533198	0.0826927361042012	-3.0988484672982	0.00194274356757669	0.00477900695848413
ATP6V1F	2392.70344356184	-0.277572261443402	0.0611972985883965	-4.53569467682405	5.74141900910609e-06	2.42523312716683e-05
ATP6V1G1	1695.41390683351	-0.0246118137482691	0.03916047594088	-0.628486073188314	0.529685567134364	0.653786110172731
ATP6V1G2	2039.31253577154	0.788651295339826	0.135219768661566	5.83236684359148	5.46466106690933e-09	4.18986011778375e-08
ATP6V1G3	0	NA	NA	NA	NA	NA
ATP6V1H	1381.41949483118	0.160955428617653	0.0689247410172735	2.3352344345743	0.0195311771905698	0.0379259383724426
ATP7A	229.84123771067	-0.340355213121848	0.083069482352842	-4.09723527198799	4.18113895927268e-05	0.000149277153904057
ATP7B	144.757326355641	0.61766855653617	0.0859654456945122	7.18507944146681	6.71681202272299e-13	1.06604777135888e-11
ATP8A1	1682.56460069466	0.704679896928351	0.126285517576348	5.58005312447901	2.40445135410907e-08	1.6248542702774e-07
ATP8A2	65.8835955089247	1.13510860253125	0.290311096483928	3.90997318490061	9.23063675643149e-05	0.00030518254517871
ATP8B1	39.5536058836392	-0.903965136846907	0.156673961557061	-5.76972157889608	7.94026105059812e-09	5.89320974395116e-08
ATP8B2	762.489548850537	-0.0284407614166655	0.0588294397143596	-0.483444369940572	0.628780250249997	0.749628521982655
ATP8B3	26.1226286138623	-0.488785001183439	0.119053169842277	-4.10560257934322	4.0326227961449e-05	0.000144291937390975
ATP8B4	170.711121999577	-0.536297752080376	0.125110160758183	-4.28660429201229	1.81425046936546e-05	6.94851070564573e-05
ATP8B5P	32.377854945639	-0.162737353182759	0.0878464945725895	-1.85251960222824	0.0639512453928785	0.108214079936378
ATP9A	6794.72207340362	0.290119021615063	0.100280540165173	2.89307398162401	0.00381491427138229	0.00880747206221758
ATP9B	448.706511209998	0.0084011603271549	0.0469651681680129	0.178880661027352	0.858031408120591	0.944804075947476
ATPAF1	1933.25053242258	0.0103384909612736	0.0609570142564194	0.169602974938767	0.865322382785736	0.95041607441499
ATPAF2	346.212663752966	-0.0329892012630298	0.0434491160340068	-0.759260585122371	0.447696690451759	0.56974263773456
ATPBD4	137.111630045112	-0.104629083590924	0.0665092376988338	-1.57315114728429	0.115683824093669	0.181462996505884
ATPIF1	1446.78967996199	0.0148920871131627	0.0655107194470585	0.227322905913093	0.820172662957649	0.915740444606129
ATR	458.99456705793	-0.176545860239005	0.0594061846486115	-2.97184310494397	0.00296017913348181	0.00700168583878162
ATRIP	197.076747831283	0.0841776862432071	0.0687805254936511	1.22385930667217	0.22100530695152	0.316347931292973
ATRN	2417.19764536175	0.115958999349094	0.0539773167119865	2.14829128998447	0.031690622393683	0.058329420195758
ATRNL1	662.003826524467	0.510050648803664	0.157480315366755	3.2388216115507	0.00120024617175681	0.00310084807629112
ATRX	1281.40849920285	-0.363483134256805	0.114531061856699	-3.17366423015964	0.00150527715895712	0.00379188985757713
ATXN1	1347.69091751579	0.048402538147623	0.0582380360404683	0.831115563615318	0.405908348340746	0.525652231464992
ATXN10	2984.58183184717	0.177848755850617	0.0467899702310266	3.80100168844915	0.000144112319957893	0.00045685574430373
ATXN1L	1152.4942950627	0.0190085984995345	0.0538455153249143	0.353021015489087	0.72407268549738	0.836618203533025
ATXN2	1097.90029707708	0.02537307812149	0.047791332440087	0.530913804366066	0.595478511323329	0.718185407530425
ATXN2L	2587.10398460308	0.233058434956735	0.0522669521804783	4.45900182111215	8.2342221586594e-06	3.3672889188475e-05
ATXN3	267.379513727786	0.215204188308634	0.0470970217763931	4.56937997757861	4.89169203447862e-06	2.09398369760572e-05
ATXN3L	0	NA	NA	NA	NA	NA
ATXN7	430.819221346429	0.0436359484937555	0.0509352972192568	0.856693705072919	0.391614183190721	0.510266107125762
ATXN7L1	157.512456792486	-0.310658237991244	0.0812020932487035	-3.82574174584107	0.000130378917411287	0.000417460998906849
ATXN7L2	291.611716850387	0.479110910957699	0.110095537928652	4.35177410430738	1.35040357770151e-05	5.31489614891002e-05
ATXN7L3	1418.38029702547	0.232476670700615	0.0591684594624913	3.92906411308527	8.52771031757907e-05	0.000284208403026019
ATXN7L3B	3316.67146841837	0.285459588872851	0.0600040999593792	4.75733473322819	1.96165739448682e-06	9.14001975102751e-06
ATXN8OS	0.0619084492273274	0.251382929248809	2.25749263455594	0.111354927764031	0.911334900137426	0.982624319743219
AUH	184.940096397911	-0.0275271623482011	0.0577256126507166	-0.476862194858999	0.63346025404701	0.753962769549694
AUP1	2135.17962153741	-0.0822051806027201	0.051265769924909	-1.60351011450973	0.10882207787308	0.172266268497914
AURKA	105.576937308676	-1.05388449454129	0.160240666725514	-6.57688535674001	4.80404884848808e-11	5.44682443612755e-10
AURKAIP1	1449.87468762774	-0.0172215865825516	0.0871382079704855	-0.197635308134691	0.843330407745413	0.933178154856809
AURKAPS1	4.57573553371773	-0.573546668100138	0.169943890276738	-3.37491784592063	0.000738377295874638	0.00199985735083334
AURKB	96.5252756693642	-0.893699800832962	0.272603363408796	-3.27838875374685	0.00104401506104215	0.00272832576290045
AURKC	21.5273306922776	-0.892050111476094	0.181029164923793	-4.92765965004377	8.32204175215696e-07	4.18463864162898e-06
AUTS2	1132.13406358835	-0.033191998294983	0.0919169980116581	-0.361108380527976	0.718018428609988	0.831382498578486
AVEN	136.155411904463	-0.187015381984853	0.0658439126948626	-2.84028354832936	0.00450734499733162	0.0102581216175151
AVIL	93.0463970237269	-1.11572536947435	0.201803515185198	-5.52877073746926	3.22482451322741e-08	2.12840601973594e-07
AVL9	268.237817244064	0.258483850281102	0.100124430879154	2.58162616268032	0.00983360412840339	0.020564049835041
AVP	0.276334218393913	0.972434558751053	1.67532733984053	0.580444511126774	0.561614895971761	0.684673442327492
AVPI1	166.253165343442	0.120671217420429	0.0970623168982133	1.24323446293759	0.213781446574524	0.307520879307511
AVPR1A	4.34530718838243	0.0455452545363886	0.247863641797358	0.183751252124442	0.854208600016842	0.941711952843953
AVPR1B	0.103367715224576	-0.155242960399474	1.27242906880169	-0.122005197936631	0.902894901668934	0.976928975380421
AVPR2	1.05861425277612	-1.39892872743869	0.353198954944879	-3.9607385804893	7.47182976380693e-05	0.000251948031308992
AWAT1	0.0049629279255739	0.0413709078295113	2.90030575372639	0.0142643263650244	0.988619100171593	0.997580121386579
AWAT2	0.72378291641401	1.84717785202112	0.512789738503032	3.60221297995065	0.000315519688473801	0.000929205005795463
AXIN1	854.44268621663	0.219007008321869	0.0532160773269326	4.11542938380071	3.86459304484274e-05	0.000138866000081093
AXIN2	520.343093671228	0.237860135486567	0.0953352515968309	2.49498618299627	0.0125962034892309	0.0255809113269887
AXL	1575.81719686869	-0.404758649848606	0.105545240660577	-3.83493037976265	0.00012559986578968	0.000403817450386154
AZGP1	480.358143858059	0.309500702763437	0.249078616262299	1.24258239188831	0.214021761800915	0.307775705563332
AZI1	466.243166496681	0.106991601277858	0.0875180633876452	1.22250878431757	0.22151528404319	0.317008068580789
AZI2	827.858813105444	-0.0587874616500348	0.0406873811781678	-1.44485734760386	0.148497958929765	0.225582635973587
AZIN1	4595.78540111021	0.148077180165786	0.0615846791511229	2.40444834992838	0.0161968948451555	0.0320777848320375
AZU1	2.42005417171159	1.22472585422473	0.340136385496584	3.60069050665276	0.000317373185121366	0.000933957931151354
B2M	26553.6380364789	-0.843081660445049	0.101366511812967	-8.31716160856586	9.00948683171805e-17	3.04852254080182e-15
B3GALNT1	652.465524572037	-0.247508681418799	0.093427169105166	-2.64921525279431	0.00806789273696905	0.0172151554021816
B3GALNT2	345.69307130278	-0.397623048114519	0.0722614935872778	-5.50255784063289	3.74320362123203e-08	2.44405489372905e-07
B3GALT1	36.9435899458665	-0.117450989945799	0.186166773198984	-0.630891259098434	0.528111627502661	0.652233421204414
B3GALT2	280.362251794681	0.543127294456309	0.130750393287816	4.15392474775004	3.26820695101778e-05	0.000119238774757275
B3GALT4	129.877407981991	-0.703887829073962	0.109790304376731	-6.41120209174996	1.44376658404943e-10	1.51122506568869e-09
B3GALT5	13.2277218370267	-0.332031766755005	0.16866525736178	-1.96858423571377	0.049000854304612	0.0858296621188899
B3GALT6	717.703948377979	0.0951253989992337	0.0809337681853181	1.17534869723871	0.239855239412254	0.339687444858656
B3GALTL	648.328862307554	-0.351522752455993	0.0979418991001443	-3.58909471518993	0.000331828273818106	0.000972238884052149
B3GAT1	3454.48882585938	0.41241331234651	0.090570782298816	4.55349177603273	5.27627351781785e-06	2.24186986837301e-05
B3GAT2	760.117555219545	-0.177454504441071	0.211218397532898	-0.840147006670816	0.400825966789495	0.520598300195073
B3GAT3	1111.2934608282	-0.0789745713465494	0.0725983036903382	-1.08782943033226	0.27667041454636	0.382650183047726
B3GNT1	3695.51141233993	0.273140983760302	0.0740071489980034	3.69073782004048	0.000223604519503164	0.000680732909265332
B3GNT2	244.918818606493	-0.0808283765710892	0.067238435306326	-1.20211566796357	0.229318716766111	0.32661661720049
B3GNT3	0.144391818318862	-0.620473858845666	1.20275777808991	-0.515875989454032	0.605941024759349	0.727607083516709
B3GNT4	12.2711129742559	0.890528592029469	0.275668318877143	3.2304350229899	0.00123601995496749	0.00318018931597878
B3GNT5	313.259464608629	-1.26584931469379	0.149039920110839	-8.49335744243817	2.00751672776413e-17	7.57391808433189e-16
B3GNT6	0.412848407264146	0.56912613396988	0.39757663759779	1.43148786963091	0.152290441071688	0.230642683696263
B3GNT7	152.669646708119	-1.62272237442042	0.227965272870561	-7.11828759699644	1.09276172175286e-12	1.66260155792062e-11
B3GNT8	7.0983896040495	-1.16587692962094	0.1816376720579	-6.41869561755502	1.37446910446107e-10	1.44489767238114e-09
B3GNT9	492.007294903885	-0.636468923345275	0.131678323621258	-4.83351326051151	1.34144339095208e-06	6.47307048518347e-06
B3GNTL1	78.1990476253374	0.0305948007076585	0.0892108848154215	0.342949190235693	0.731636684836296	0.843114703923574
B4GALNT1	526.451928108944	0.228144412088086	0.139394100024999	1.63668628763463	0.101696035578188	0.162423644466023
B4GALNT2	0.136928911030512	-0.767420673478713	2.90030575372639	-0.264599921057534	0.791317680952401	0.892418794223024
B4GALNT3	27.5007757975455	-0.334385328908424	0.223486132298128	-1.4962240630768	0.134595275918369	0.207159593117667
B4GALNT4	1587.9753274317	0.382429065879314	0.112176613254607	3.40916929816124	0.000651610279009484	0.00178745733116043
B4GALT1	583.581182302861	-0.36860221681367	0.102437992311539	-3.59829598858848	0.000320308964451158	0.000941318111754083
B4GALT2	1628.213314124	0.112823316978493	0.0667578926442633	1.69003712534339	0.0910208522831013	0.147378616847856
B4GALT3	633.721664039531	0.0547559637282185	0.0513659733440498	1.06599681001784	0.286425083930402	0.393707590526815
B4GALT4	537.431865501409	-0.403143524831153	0.0572229006214204	-7.04514312369973	1.8527097158928e-12	2.69472480319034e-11
B4GALT5	2351.06068233353	-0.350556415614575	0.0864892281770054	-4.05318006650655	5.05260819400899e-05	0.000177113909534596
B4GALT6	274.539090950142	0.250269887925352	0.132335860105888	1.89117211105969	0.0586013729338704	0.100328597898905
B4GALT7	516.784031407525	-0.198257789193567	0.0554409482786949	-3.57601728233343	0.000348868598507954	0.00101696814013162
B9D1	199.181101575637	-0.503013236733281	0.0793666456208107	-6.33784170666004	2.33006029957728e-10	2.3360532530227e-09
B9D2	95.7409084371324	-0.511122508382215	0.100129128516551	-5.10463354624851	3.31436147012699e-07	1.79935668670683e-06
BAALC	11173.1850981035	0.0330650264382403	0.0985956403043818	0.335359923990177	0.737353595293531	0.847772589206869
BAAT	10.3568098108615	0.290666489442889	0.183914524879526	1.58044335885538	0.114005368598615	0.179161799224883
BACE1	3381.22161087965	-0.0982954340753485	0.0619305730015737	-1.58718754423361	0.112470174959913	0.177020407814641
BACE2	196.144752342071	-1.07351152997677	0.134063384895573	-8.00749235753647	1.17071017997829e-15	3.03823454164804e-14
BACH1	722.526154655191	-0.0999633717272306	0.0675568434525584	-1.47969275381301	0.138955260287453	0.212828135402943
BACH2	229.295521561052	0.0924363239779344	0.0885622413758548	1.0437441797079	0.29660376366599	0.405585305118231
BAD	1400.68247738147	0.0428220802811239	0.0829668362574436	0.51613490658181	0.605760189603587	0.727479579479568
BAG1	1397.40957704036	0.229096556096853	0.072203984952698	3.17290737134436	0.00150920666688036	0.00379963699594207
BAG2	126.350811851107	-0.00441842932746716	0.0933396102488819	-0.0473371306745957	0.962244535240696	0.997580121386579
BAG3	1887.1320672656	-0.0571675505063108	0.126735156948658	-0.451078863061416	0.651932711086432	0.77038779372009
BAG4	151.625376657236	0.199257953786172	0.106237014004075	1.87559821455947	0.0607104717696093	0.103448775554265
BAG5	1075.6875010138	-0.0716303853476435	0.0494159166835014	-1.44954075842448	0.147186626489415	0.223834843186541
BAGE	0.00939327604181608	-0.0460822086388766	2.90030575372639	-0.015888741585148	0.987323151783713	0.997580121386579
BAGE2	4.1250067603504	0.209871809675346	0.188346094110765	1.11428809111339	0.265155614283585	0.369248153872318
BAHCC1	969.450835366687	0.455071980127026	0.0841532387369595	5.40765854002909	6.38540130311197e-08	4.01068228803262e-07
BAHD1	872.42381671877	0.283933979650653	0.0467643777019982	6.07158682747789	1.26652450801961e-09	1.09806773404369e-08
BAI1	2745.93947524283	1.03723335326426	0.176031697087197	5.89231013747752	3.80833549874374e-09	3.0308068138226e-08
BAI2	3378.74858789581	0.301609741439211	0.0917592653400109	3.28696770099026	0.00101272448585807	0.00265295702007711
BAI3	935.098414195232	0.661247619479172	0.0967758818129306	6.83277286749373	8.32887743477609e-12	1.09239448993126e-10
BAIAP2	1584.58896204441	0.253845894418125	0.0904867838730269	2.80533668623174	0.00502640457678206	0.011311006258109
BAIAP2L1	12.0202970079583	0.0405263562329369	0.140572967309715	0.288294093868332	0.773121627742244	0.877687588810365
BAIAP2L2	35.2207895320533	0.588285874822678	0.146827266560198	4.00665277373044	6.15852963279432e-05	0.000211275640117579
BAIAP3	2023.85969264953	-0.39652240833908	0.174978634545069	-2.26611900001396	0.0234440982323714	0.044582444584732
BAK1	235.871679881799	-0.244799506546431	0.051141954463034	-4.78666701569597	1.69573830523239e-06	8.02767538717009e-06
BAMBI	437.947910590425	-0.177414981925174	0.14323723851963	-1.23860934320415	0.215490206303648	0.309522007580375
BANF1	2450.00056883401	-0.129088556273476	0.0687943100207711	-1.87644234289871	0.0605945648765463	0.103296428710215
BANF2	0.0893637887711308	-0.156136088999893	1.56010929853637	-0.100080224601169	0.920280634981879	0.988932545393219
BANK1	21.0286224244208	-2.14627172145	0.281729887420217	-7.6181896819797	2.5725807792509e-14	5.33399993485106e-13
BANP	246.56439482934	0.118718507712702	0.0547872260396957	2.16690123399724	0.0302423858500904	0.0560076111951979
BAP1	2440.58907487935	0.205304794430882	0.0459586885808715	4.46715954633075	7.9265014973573e-06	3.25579587320324e-05
BARD1	104.79090210333	-0.406266790244562	0.15075825195552	-2.69482290338859	0.00704260514208892	0.0152584312374069
BARHL1	2.70495186828656	0.498549480233563	0.46465964928745	1.07293474050971	0.283300397476282	0.390103486421699
BARHL2	0.441274118874676	0.545850703467596	1.08568490052667	0.502770834523719	0.615125401292964	0.736186310789061
BARX1	2.26673128752387	-0.496532269794187	0.513472845303058	-0.96700784537326	0.333540111731716	0.446114343772598
BARX2	8.45431040508389	-0.84496089451215	0.333192418491955	-2.53595474451815	0.0112141225088231	0.0230795404115061
BASE	0	NA	NA	NA	NA	NA
BASP1	2303.28069172613	0.572746497318733	0.132554922441887	4.32082405366596	1.55447587845397e-05	6.04363352704327e-05
BAT1	5088.90409759711	0.173622197226219	0.050052967954953	3.46876927223331	0.00052284827416793	0.00146475677210478
BAT2	9210.21611253907	0.273009355553712	0.0471873384136052	5.78564853903684	7.22330992460912e-09	5.40846371227936e-08
BAT2L1	7421.77844494434	0.225164629141853	0.0581266342318226	3.87369115926863	0.000107199248382958	0.000349383503509006
BAT2L2	3173.07947120131	0.0211411907495252	0.0576164860302328	0.366929540590725	0.713671575822637	0.827746906259414
BAT3	4535.65831537029	0.12861126574081	0.0438426346847939	2.93347483939911	0.00335190820772669	0.00783249594703503
BAT4	602.349600456916	0.0561372121946687	0.0687003453065915	0.817131441539968	0.413853316624577	0.534490831688623
BAT5	1085.98575844195	-0.0671888331674829	0.037041471962977	-1.81388129593333	0.0696960029194975	0.116869577295105
BATF	18.2333327492977	-1.69608604014557	0.219524963485015	-7.72616477515708	1.10835145135809e-14	2.4326317327668e-13
BATF2	122.616546352365	-1.11588022905705	0.157408325819941	-7.08908009309177	1.35006379545356e-12	2.01784841820475e-11
BATF3	81.1120437378228	-0.835052726017964	0.16057116918844	-5.20051470160238	1.98737397529437e-07	1.13058723813448e-06
BAX	744.711894506872	-0.447337912692991	0.0780965805269992	-5.72800895601747	1.01616203127845e-08	7.39544361076061e-08
BAZ1A	559.376870574128	0.155050945737348	0.0962074024746797	1.61163217953166	0.107042003865874	0.169834634919073
BAZ1B	2589.64108940157	-0.160289236325051	0.0550694733014662	-2.91067313187438	0.00360651095103135	0.00837594118632043
BAZ2A	1739.49282979184	0.349864916712351	0.0549926147616349	6.36203457916737	1.99098602881878e-10	2.02316567787685e-09
BAZ2B	1117.67470716163	0.221031292455077	0.0709680842683	3.11451682448482	0.00184246448729959	0.00455763838779909
BBC3	125.96491746835	-0.18903145811167	0.0952809971333704	-1.98393660644705	0.0472629074237578	0.0831591645471734
BBOX1	1212.6538922812	-0.257015448954298	0.133635803955776	-1.92325291086925	0.0544482952419273	0.0941111452877938
BBS1	1380.65259716167	0.0290412982196288	0.0688249174166497	0.421959071070433	0.673054892162444	0.790183714730801
BBS10	624.789641474127	0.200237477160839	0.0650532415393669	3.07805533471635	0.00208356222333502	0.00509766219169562
BBS12	123.862411422856	-0.536915592335887	0.067695852630706	-7.93129226490233	2.16877141521612e-15	5.34378696366147e-14
BBS2	2819.45631169845	0.156641551689482	0.0629809520223481	2.48712581597528	0.0128779846180739	0.0260960615727032
BBS4	494.5875253567	-0.204347344455736	0.0524174135004659	-3.89846294979664	9.68052087018792e-05	0.000318866573871831
BBS5	342.138864270443	-0.281976044997555	0.0677835020855235	-4.15995096626583	3.18315925107026e-05	0.000116441016898197
BBS7	290.235629359124	-0.0753890618254604	0.0604126051318284	-1.24790284512564	0.212066638615213	0.305482541508537
BBS9	410.647235352637	-0.288897332617623	0.049794087895051	-5.80184003423299	6.55911219361715e-09	4.94917137644592e-08
BBX	1999.25027361775	-0.059546970681904	0.0725643859713391	-0.820608758481376	0.411869157194385	0.53228100747421
BCAM	775.745000910049	-0.430032708195308	0.118732023124699	-3.62187636391628	0.000292473904092056	0.000867364027807999
BCAN	70896.2274966923	0.877606913661891	0.126612904415255	6.93141759692666	4.16644125941587e-12	5.70653128222174e-11
BCAP29	1591.48576304474	-0.385445355484362	0.0649519569452472	-5.93431473988201	2.95075302745348e-09	2.38334755512094e-08
BCAP31	3381.91935112437	-0.20016541780269	0.0561014831378591	-3.56791668610294	0.000359830871790219	0.00104579536104852
BCAR1	2139.69186373365	0.532254590746413	0.080444235975513	6.61644161687893	3.67948093611565e-11	4.24840541735154e-10
BCAR3	423.247994925729	-0.423494146298714	0.125998032091207	-3.36111714818021	0.000776278930080275	0.00209233527136835
BCAR4	0.087947076006819	0.165719052712552	1.20022966501229	0.138072785187204	0.89018289401718	0.968086425822935
BCAS1	2588.01990961705	-0.481156862015379	0.180047046477801	-2.67239519574515	0.00753118956431276	0.0161869083158862
BCAS2	723.42059263187	-0.165987463736312	0.0361908189452582	-4.58645227087518	4.50841409683766e-06	1.94486477971151e-05
BCAS3	785.189136262484	-0.0703152980266068	0.0532725922800468	-1.31991508235546	0.186863371376707	0.273955702432076
BCAS4	550.0548780154	-0.66072337589296	0.104156908353699	-6.34353867003482	2.24546574885099e-10	2.25588285799514e-09
BCAT1	874.767871604181	-1.50124686415615	0.217330739517133	-6.90766003691713	4.92712985468927e-12	6.69196939845951e-11
BCAT2	344.207036951393	0.0280205735182916	0.0907170921083065	0.308878656348883	0.757413833223477	0.865080125335783
BCCIP	1033.91840741672	0.285662155250661	0.0636671085736052	4.48680899212517	7.22978359184113e-06	2.99805281287199e-05
BCDIN3D	198.179277059209	0.128435353228421	0.0477606672495539	2.68914486804245	0.00716353237460084	0.0154992502199123
BCHE	1649.18455836705	0.118612893842262	0.101378778304929	1.16999726989701	0.24200206751118	0.342081541615382
BCKDHA	1178.01697516377	0.313055562139883	0.0701358099357738	4.46356237172652	8.06081194240475e-06	3.30122346622123e-05
BCKDHB	660.981169088327	-0.481130639844522	0.0918678588703927	-5.23720314983396	1.63028215774322e-07	9.42574881471829e-07
BCKDK	943.445728986428	-0.0631129331276485	0.0465715472141083	-1.35518222827111	0.175359505396896	0.259727696647579
BCL10	230.516298896576	-0.237497963174446	0.0468637904093866	-5.06783512600543	4.02365685476737e-07	2.15146974209646e-06
BCL11A	118.727798492075	0.312887741232949	0.225687870662458	1.38637375732481	0.165632805419831	0.24754109175926
BCL11B	107.253513413481	0.451207870716577	0.155269988139573	2.90595675392841	0.0036613204795059	0.00848705234842651
BCL2	757.229321927676	-0.247276477290587	0.0911717125973217	-2.71220612453266	0.00668370168391118	0.0145796718103427
BCL2A1	59.9962106691709	-1.11967040840553	0.23734883313039	-4.71740431009586	2.38872688945076e-06	1.09338391440571e-05
BCL2L1	2770.04957284665	-0.127185465690457	0.0636376905993931	-1.99858707147475	0.0456530503736421	0.0805958289657867
BCL2L10	0.473338800573483	1.02719348240192	0.446559821752909	2.30023712919317	0.0214347893711267	0.0411793045680886
BCL2L11	463.987046554067	0.330133199656604	0.0839627975981961	3.9318985205383	8.42776430539022e-05	0.000281262202589136
BCL2L12	76.3464431492141	-0.889820224686885	0.103958691117835	-8.55936348485088	1.13492366494303e-17	4.5234483087402e-16
BCL2L13	1327.06436045675	-0.0985486817910991	0.0507257550206264	-1.94277407504387	0.052043461587609	0.0905164256953863
BCL2L14	2.49248801230192	-1.17137491010739	0.237142443864286	-4.93954136180599	7.8306532783426e-07	3.96105456514138e-06
BCL2L15	11.7259089948141	0.248455130862298	0.123696280992642	2.00859014408911	0.044580617407482	0.0789098386406162
BCL2L2	1563.01997710291	0.229417660151087	0.0846305432881499	2.71081398319713	0.00671182683251195	0.014629110374151
BCL3	146.993115703549	-0.636059589615968	0.114946914058875	-5.53350731356025	3.13889888566631e-08	2.07520825243e-07
BCL6	2873.06578203332	0.421292106452983	0.088037972816607	4.78534537966455	1.70693550273951e-06	8.07479925931869e-06
BCL6B	148.669733962851	-0.290849031391563	0.139143655914086	-2.09027878045081	0.0365927642768533	0.066226481173356
BCL7A	1083.92531441418	0.907891718589376	0.104675308212393	8.67340860126443	4.193737752906e-18	1.84089974784094e-16
BCL7B	1038.24659878853	-0.192931057451672	0.0515121826265427	-3.74534814124261	0.000180143789008765	0.000559165862045043
BCL7C	609.896161253852	-0.317972604046381	0.0883250960380679	-3.60002556815036	0.000318185891353982	0.000935925599530502
BCL8	2.19670342990649	0.511477488739646	0.260076107179087	1.96664543424378	0.0492241016412766	0.0861200844693429
BCL9	864.097143633095	0.0141864101682747	0.0597220379620477	0.23754062407063	0.812237407420967	0.909851547251833
BCL9L	1407.27313277338	0.389502550834051	0.0684983692226322	5.68630399897692	1.29818221359532e-08	9.23752148337816e-08
BCLAF1	2980.98571283172	-0.00437356741298065	0.0487217968295221	-0.0897661354379806	0.928473059517846	0.994282413736418
BCMO1	52.149747536047	-0.940956219872629	0.166189726976545	-5.66193974195186	1.4967138620794e-08	1.05044843975252e-07
BCO2	64.2546466998086	-0.933254119938742	0.159463477218149	-5.85246312333973	4.84345661252775e-09	3.76054961321418e-08
BCOR	639.58425319791	0.201247056515113	0.0848671471333456	2.37131874126637	0.017724738166844	0.0347645312339528
BCORL1	342.562999134563	0.0832681293869401	0.0740084135026078	1.12511707042613	0.260539428562026	0.363721328176627
BCORL2	1.2997959109138	-0.0101571437586631	0.432526504875305	-0.0234832863285253	0.981264770387126	0.997580121386579
BCR	4494.29257199547	0.797040417752318	0.0958664408605552	8.3140712286552	9.24736012916073e-17	3.11818423732427e-15
BCS1L	436.89309038707	0.112827610065214	0.0555876729670007	2.02972357076709	0.0423846455944021	0.0753650891921264
BCYRN1	0	NA	NA	NA	NA	NA
BDH1	289.27989768344	-0.432961082550033	0.161289562272504	-2.6843713656965	0.00726663403762952	0.0156979269999334
BDH2	1220.31937530298	-0.365434646343116	0.0961207120924448	-3.80183041082401	0.00014363103114743	0.000455626431813707
BDKRB1	1.18377992370202	-1.82113021166252	0.343003967410533	-5.30935611448147	1.10013194124623e-07	6.57591097321134e-07
BDKRB2	43.2829561007508	-1.53775149743132	0.224873252930558	-6.83830325479476	8.01366223171428e-12	1.05175944037785e-10
BDNF	56.1483797255432	0.225124041022126	0.268024729084191	0.839937575131026	0.40094338828988	0.520716108334094
BDNFOS	260.484990890085	0.168134886510415	0.0896807840794426	1.87481508147247	0.0608181676548252	0.103541761669509
BDP1	726.039999233271	0.268213810125111	0.0695836762749301	3.85455072918796	0.000115942342058399	0.000375056638459452
BEAN	48.8632283676597	-0.174669845287559	0.187985265372863	-0.929167745892777	0.35280216004128	0.467540225688757
BECN1	1359.94074364267	-0.149307777075171	0.0339230815770417	-4.40136243920182	1.07573259451223e-05	4.30956387811787e-05
BEGAIN	166.874035489797	0.558485900050254	0.201196073760877	2.77582901897985	0.00550611563023888	0.0122476824507368
BEND2	0.118950531547124	-0.563658809041431	1.45162930645495	-0.388293902950988	0.697798548744973	0.813305448812314
BEND3	124.840864039381	0.202984536491825	0.0871375001177507	2.32947394884553	0.0198339715296995	0.038441140126675
BEND4	26.4053407920004	1.20892765327917	0.229293845774126	5.27239468289116	1.34655110286379e-07	7.90252363589741e-07
BEND5	249.279158767679	0.28471056924528	0.0734426831494098	3.87663626975709	0.000105910503973162	0.000345298715697042
BEND6	470.056623272556	-0.22641833948854	0.0818644177563635	-2.76577230613651	0.00567881706018393	0.0125987643145116
BEND7	368.314371655344	0.576778351857259	0.0892553084356713	6.46211818620244	1.03247407750578e-10	1.1080902957372e-09
BEST1	414.370480450455	-0.131877749765719	0.133822648366796	-0.985466596089578	0.324394931621495	0.435816699963823
BEST2	0.360322127918864	-0.249239893244137	0.411603502581116	-0.605533946337151	0.544824276279745	0.668510774659546
BEST3	606.14992560575	0.721302845719926	0.177253275939917	4.06933435726414	4.71476454894762e-05	0.00016643861811083
BEST4	14.3779391938481	-1.65609878438757	0.215850136988315	-7.67244722423886	1.68745397873673e-14	3.60619276815557e-13
BET1	339.819739656481	-0.448105609486838	0.0511347934062901	-8.76322323093058	1.89745394494e-18	8.91117527394711e-17
BET1L	928.431789252126	-0.177243933321262	0.0496325700524629	-3.57112140543821	0.000355456073746154	0.00103462348824859
BET3L	0.19324582598564	-0.323010875524335	0.684179033156471	-0.472114548781361	0.636845028404945	0.756844848800482
BEX1	2640.28807022478	0.750361293037904	0.104923972565449	7.15147620406621	8.5849604427721e-13	1.33217260373908e-11
BEX2	873.219004008368	0.410164776529812	0.144228761339967	2.84384870756116	0.00445722067054508	0.0101544396106281
BEX4	2644.97846248457	0.286839622006403	0.066265534984207	4.32863964766548	1.50033186850144e-05	5.85063387696939e-05
BEX5	164.187525583187	0.497331389529687	0.208326683624419	2.38726686796541	0.0169741646751319	0.0334370799998303
BEYLA	0	NA	NA	NA	NA	NA
BFAR	783.983650069885	-0.151092264902141	0.0373426462284201	-4.04610492727079	5.20768975500523e-05	0.000181961049345737
BFSP1	16.459086596705	-0.236622102733805	0.173146234640482	-1.3666026479012	0.171749886809495	0.255468617409529
BFSP2	0.170109127606581	0.0268049992203265	0.861830203078432	0.0311024133577354	0.975187865020933	0.997580121386579
BGLAP	60.2881193772669	0.15248978817121	0.10524329915502	1.44892633921137	0.147358154602495	0.224025774820798
BGN	2395.43525236817	-1.32510280050662	0.157921928611373	-8.39087270626955	4.82546593277282e-17	1.69762330378596e-15
BHLHA15	0.904688468228021	-0.325198291821158	0.428035156452666	-0.759746686501718	0.447406016279061	0.56948427751299
BHLHB9	285.770658563578	-0.0838562655737594	0.101665358034295	-0.824826343949647	0.409470188045702	0.529672394306148
BHLHE22	23.4138905120169	0.784271330302236	0.299299129290355	2.62035954518732	0.00878371045777182	0.018600012692522
BHLHE23	0.0403872967167414	-0.0434047065760531	2.90030575372639	-0.0149655623446892	0.98805965457243	0.997580121386579
BHLHE40	1362.29752241365	-0.760534456365604	0.145784291168423	-5.2168477842854	1.81993696125159e-07	1.04233239420492e-06
BHLHE41	2428.38474165758	-0.668864621859948	0.116917651877984	-5.72081812383625	1.06012332483477e-08	7.68096788142365e-08
BHMT	2.72876063921394	0.550426399028486	0.295682667312651	1.86154435101356	0.0626673435653389	0.106301059489241
BHMT2	47.7576442996407	-0.771978443969124	0.197701167052244	-3.9047743393701	9.43133488053156e-05	0.000311289952280373
BICC1	25.1036098814354	-1.02274937784709	0.20620607079914	-4.95984125919998	7.05508071704551e-07	3.59862662065472e-06
BICD1	241.746157635237	-0.769752386286117	0.129380250962474	-5.94953542414581	2.68904641293802e-09	2.18828870931783e-08
BICD2	1134.01068800068	0.213887556391316	0.0491628404613001	4.35059395235072	1.35769265622937e-05	5.33927156374301e-05
BID	1118.72888378997	0.462385331462356	0.0848469792348653	5.44963810888806	5.04724161011307e-08	3.23162743039105e-07
BIK	2.19472686096016	-0.749072651704753	0.236252396022518	-3.17064573446	0.00152100515553017	0.0038270578984357
BIN1	4012.8639377579	0.000581428730098479	0.111084017262928	0.00523413488659018	0.99582378365356	0.997580121386579
BIN2	272.173303315941	-0.576723537975707	0.113885519884844	-5.06406379457956	4.10412207545844e-07	2.19148874659411e-06
BIN3	353.167622951547	-0.237265995674122	0.0596969517363195	-3.97450772230586	7.05249740848098e-05	0.000238924342936371
BIRC2	1152.10503311528	-0.0268428460487256	0.0437873842686728	-0.61302693680038	0.539858528845517	0.663713033949355
BIRC3	59.2864134169519	-1.17371380189124	0.187329591248359	-6.26550132346762	3.71627845326089e-10	3.5715121821526e-09
BIRC5	164.506656547935	-0.912638016773355	0.264743688394964	-3.44725127275485	0.000566321600657654	0.00157522591648604
BIRC6	1706.4038394941	0.253571905203548	0.0728474945152923	3.48085966292661	0.000499807289708804	0.00140606871772872
BIRC7	12.2356332316909	-0.429512100495892	0.234642915758487	-1.8304925128785	0.0671763253268762	0.113043220568194
BIRC8	0.00558645259618473	-0.0172286700452828	2.90030575372639	-0.0059402944062525	0.995260358681342	0.997580121386579
BIVM	713.329615520226	0.465555561087621	0.0729485471567421	6.38197166678724	1.74822314756981e-10	1.794253246242e-09
BLCAP	2352.34989265367	0.125946568525468	0.0565975098694123	2.22530229361795	0.0260609515862386	0.0489663497942533
BLID	0.0104480199567718	-0.0460822086388763	2.90030575372639	-0.0158887415851479	0.987323151783713	0.997580121386579
BLK	1.35644565779463	0.866973539329473	0.453238476406427	1.91284188007031	0.0557682978837388	0.0960662923280261
BLM	321.229479530059	-0.712833248846591	0.196398916129534	-3.6295172238957	0.000283951785161022	0.000844661216848035
BLMH	823.933602021301	0.025302591790842	0.0527792257223485	0.479404376334532	0.631650980731885	0.752222755374828
BLNK	178.428261354754	-0.740621299364568	0.139180189121449	-5.32131263823976	1.03021178890143e-07	6.20099683931097e-07
BLOC1S1	1489.5391419364	-0.202849944723775	0.0876457399698727	-2.31443016846572	0.0206441376364694	0.0397937140277706
BLOC1S2	974.732394705015	0.0940011418878736	0.0576597796435821	1.6302723053909	0.103043958099131	0.164194856071785
BLOC1S3	305.449727969128	-0.0293799667051456	0.0512227440400525	-0.57357268252112	0.566257001856993	0.689405323203153
BLVRA	768.914565853908	-0.15224009979791	0.0602742967224433	-2.52578807346287	0.0115439095074729	0.0236907229968039
BLVRB	639.772507050972	-0.331754047338943	0.106680381308523	-3.10979435271702	0.0018721764020541	0.00462292133232414
BLZF1	302.017973006006	-0.267235182443003	0.0468006367250629	-5.71007578407351	1.12925877483798e-08	8.1244937325922e-08
BMF	303.475071368369	-0.180294484312046	0.128566354544407	-1.40234577662985	0.16081201692981	0.241242780939194
BMI1	1520.95023838628	0.080317785002568	0.0565038632646536	1.42145652282879	0.155184084451506	0.234260537987752
BMP1	675.876296461096	-0.393411192893753	0.0813123971752921	-4.83826829069672	1.30975268208922e-06	6.33607745960264e-06
BMP10	0	NA	NA	NA	NA	NA
BMP15	0.0351955565921729	0.102651581903085	2.36837715374223	0.0433425823842655	0.965428447263746	0.997580121386579
BMP2	936.836945734137	1.29054271069419	0.174330949673102	7.40283187302174	1.33310491054184e-13	2.36632192226416e-12
BMP2K	507.542384290134	-0.45347245114298	0.110855369924128	-4.09066742958276	4.30133558931538e-05	0.000153134834647915
BMP3	3.12774819189897	-0.112591625775875	0.362250731716837	-0.310811313595595	0.755944068380755	0.864075414505948
BMP4	113.2549353151	0.51661481329783	0.130737838112799	3.95153247717085	7.76523313519705e-05	0.000261253916459504
BMP5	1.55525169286386	-3.22460271466996	0.795437794154647	-4.05387163944971	5.03768656381076e-05	0.000176821859269145
BMP6	108.760399786925	-0.206477789342372	0.161630993772914	-1.27746408360556	0.201438452771862	0.292289714452322
BMP7	2370.10428640612	-0.0544471653586318	0.0996520753315241	-0.546372618708603	0.584809827841714	0.707419534796116
BMP8A	163.14645790971	-0.0315172764854144	0.135558449314106	-0.23249953540251	0.816150048025107	0.912453726889065
BMP8B	174.899700896495	0.182675462482702	0.168872706159082	1.0817346783714	0.27937043928329	0.385672890043301
BMPER	144.914251574442	-0.0190046145422481	0.178241138658548	-0.1066230539441	0.915088028438801	0.985571517432305
BMPR1A	743.046486623403	0.197241526325602	0.0841628620174416	2.34356961725857	0.0191001973185362	0.0371705287806561
BMPR1B	1105.19621769761	-0.0284755148775578	0.114291866098583	-0.249147343985057	0.803246808629477	0.902269627121693
BMPR2	2660.11773679359	0.242404858342186	0.0656069813727921	3.69480279796432	0.000220057510687135	0.000670772737455781
BMS1	811.946581945942	0.0460277494714813	0.0458548997599011	1.00376949273655	0.315489732258004	0.426030269639611
BMS1P4	14.8808542921741	0.350850217049583	0.126322563806099	2.77741526516296	0.00547931247258002	0.0121922365670264
BMS1P5	57.6015455715871	0.721896707702306	0.103995047000374	6.94164509296016	3.8755989188755e-12	5.33819243313664e-11
BMX	2.17669119976556	0.0845650747194248	0.269045243236241	0.314315442645349	0.753281470602177	0.861739500031486
BNC1	1.22498500996051	-0.183395231438548	0.444094394145864	-0.412964527037717	0.679632603488214	0.796562597990576
BNC2	79.3810703647306	-0.76641409256625	0.163468516658439	-4.68845076858219	2.7528112125477e-06	1.24223872499548e-05
BNIP1	211.279522733275	-0.0142528239068364	0.0525769439623704	-0.27108505806342	0.78632561338947	0.888640044355837
BNIP2	517.059297175518	-0.233082595841691	0.0498222712829636	-4.67828121520008	2.8928961868319e-06	1.29973597697911e-05
BNIP3	1482.33892038476	0.3099005645452	0.0815148843490841	3.80176659784076	0.000143668037317735	0.000455647397364329
BNIP3L	3331.28172792125	-0.0190887121627015	0.0522827667566056	-0.365105241112545	0.715032848736163	0.829029757398443
BNIPL	6.5830012365182	-0.0499164161411785	0.152069684645824	-0.328246989249932	0.742724921938267	0.852660258966995
BOC	968.028265929145	-0.0733270731626362	0.109086673384982	-0.672190936686236	0.501462150127568	0.625704052880045
BOD1	754.098551186695	-0.157793691127729	0.0468620549814184	-3.36719529671281	0.000759368909232465	0.0020512959169703
BOD1L	1340.45192424842	0.123080121398397	0.0654362062748506	1.8809177427161	0.0599831092558123	0.10236150944714
BOK	726.157139098092	-0.236256019246239	0.196270627954612	-1.20372580303189	0.228695575717438	0.32582432534597
BOLA1	292.110788697622	-0.119588738325765	0.0711892617676317	-1.67987046580303	0.0929825212311229	0.150105966934033
BOLA2	746.956652903234	-0.0397790468870419	0.0669474443398546	-0.59418320264932	0.552389586252369	0.675878776825832
BOLA3	170.522122806683	-0.493032704260103	0.0600049029854094	-8.21654031138068	2.09458082316762e-16	6.37865316305264e-15
BOLL	0.0344237008091035	-0.073150745857255	2.90030575372639	-0.0252217359370711	0.979878099699185	0.997580121386579
BOP1	527.618595357376	0.384502656234962	0.130166943420154	2.95391937562719	0.0031376596646609	0.00738830335438456
BPESC1	0	NA	NA	NA	NA	NA
BPGM	735.7812000882	-0.258532395293119	0.0637589900015947	-4.05483831043517	5.01689929967494e-05	0.000176179040271468
BPHL	319.20535350287	-0.0201595513786399	0.0682773714607373	-0.295259629176448	0.767795553693546	0.873268869134407
BPI	1.84571635808038	0.255233945821381	0.287159319943128	0.88882347914715	0.374097955315256	0.490624396009309
BPIL1	5.89320324138211	-1.2131901767783	0.422737970003984	-2.86983962374345	0.00410680036983678	0.00941554396048922
BPIL2	0.130413624680874	-0.00651175416221563	1.27261030932548	-0.00511684850774707	0.995917363391069	0.997580121386579
BPIL3	0.0515341726217769	-0.276910517387624	2.90030575372639	-0.0954763190163114	0.923936499007804	0.99115907514658
BPNT1	535.297778583869	0.0317467258841443	0.0405589536472967	0.782730396849384	0.433785448268409	0.555759758172125
BPTF	2173.02373528627	0.216588378076792	0.0637725346939315	3.39626422434487	0.000683123816192446	0.00186654748038564
BPY2	0	NA	NA	NA	NA	NA
BRAF	106.198796767051	-0.00787349701174763	0.104452102191103	-0.075379019154085	0.939913151999403	0.997580121386579
BRAP	658.781643360001	0.0250453195356399	0.0364188553944393	0.687701995693802	0.491640463000841	0.615260859373724
BRCA1	272.361179142048	-0.793586649230088	0.0985062741840866	-8.05620409261494	7.87001888057484e-16	2.10406951964888e-14
BRCA2	58.8097876781492	-1.02741932084726	0.202063656546077	-5.08463193435765	3.68339655822414e-07	1.98532629756052e-06
BRCC3	305.169386836088	-0.102430686426095	0.0497822640228803	-2.05757388573202	0.0396310555988598	0.0710653485713292
BRD1	805.731729510574	0.271166251435939	0.0488052386812536	5.55608903394413	2.75886187566955e-08	1.84523740414549e-07
BRD2	4596.27119734508	0.12807454908635	0.0391538154288688	3.27106177733878	0.00107144502058196	0.00279663364820441
BRD3	1671.15623128647	0.350344951820444	0.0692884960166857	5.05632207309097	4.27419266057506e-07	2.26986416770049e-06
BRD4	1722.50869942499	0.0419721017827498	0.0536396726350638	0.782482437361353	0.433931102803878	0.555853906910784
BRD7	1596.61955031236	0.152288449469955	0.0451949245696249	3.36959184953053	0.000752795976275652	0.00203438624204277
BRD7P3	0.71658124055859	0.715333055874624	0.284749329385528	2.51215009853849	0.01199980376762	0.0245178923818968
BRD8	1453.49874610688	0.217546472792092	0.0487491310744231	4.46257129096257	8.09819725659283e-06	3.31514103194695e-05
BRD9	917.913105282526	0.209687826101111	0.0454565457756242	4.61292917275634	3.97033624728079e-06	1.73191256623775e-05
BRDT	0.0683641815163209	0.105330843873576	2.02550748396845	0.0520021993042495	0.958526940995509	0.997580121386579
BRE	575.645894530943	-0.0982395357588537	0.0460091854127594	-2.13521571567772	0.0327433937776212	0.0600629406800787
BREA2	8.09415528292163	0.287374296073251	0.145828308176644	1.97063450619718	0.0487656967766904	0.0854945965798053
BRF1	1156.5200302399	0.222949670739218	0.0568801652726991	3.91963823716644	8.86819836215958e-05	0.000294147695844946
BRF2	350.956559070762	0.00946876605834657	0.0459199859390946	0.206201414584607	0.836633582913356	0.928481296605244
BRI3	1074.86683426493	-0.299904471888828	0.0804619587547227	-3.7272827623181	0.000193555267089901	0.000596186779420989
BRI3BP	58.2913613591946	-0.187927582171709	0.0955120929371939	-1.96757893574047	0.0491165053538492	0.0859858698775282
BRIP1	41.5538604116217	-1.29448764865903	0.252618334005636	-5.12428226460455	2.98673267938508e-07	1.63699156133901e-06
BRIX1	436.290559701577	-0.0939719241210283	0.0534800523999842	-1.75713971665921	0.0788939974804824	0.130176431670725
BRMS1	742.063455414883	-0.11159593131293	0.0695704349984954	-1.60407120230517	0.10869835875476	0.172126341577046
BRMS1L	404.047671053551	0.352624743349447	0.0622263720478858	5.66680543545246	1.45484380690347e-08	1.02290424951474e-07
BRP44	768.970631040173	-0.114595954647537	0.0499645690098498	-2.29354434389188	0.0218166854413616	0.0418058400601846
BRP44L	1278.30333928685	-0.0531907978776806	0.0744562670855018	-0.71438980168854	0.474986176405592	0.598183030378973
BRPF1	580.228760642519	0.110502208211805	0.0412218125456867	2.68067320158069	0.00734742305782077	0.0158524465821572
BRPF3	934.517313721331	0.321142007974497	0.0662292368877869	4.84894622172097	1.24119061861181e-06	6.02660816062387e-06
BRS3	0.147479389508702	0.229674420108597	0.888367908011139	0.258535251034436	0.795993846996483	0.896033272378506
BRSK1	1200.7909933547	0.479476760666551	0.105090959521197	4.56249293803279	5.05497944134606e-06	2.15630442792372e-05
BRSK2	684.401018349899	0.943837733965084	0.118992060882895	7.93193871054939	2.15750914927271e-15	5.32276624295254e-14
BRWD1	1667.06983351927	0.319840504895065	0.0513147329313857	6.23291765588515	4.57826857545273e-10	4.32108738671059e-09
BRWD3	177.157454170417	0.465404946166801	0.124953880690244	3.72461378226838	0.000195614469816019	0.000602294789370333
BSCL2	2373.86452313646	-0.141616320513307	0.136089099312759	-1.04061472394527	0.298054394890973	0.407340309685511
BSDC1	2609.52609707775	0.130643709135646	0.0350932982245464	3.72275379474778	0.000197061661749017	0.000606559031504791
BSG	11147.9611566694	-0.0737055547483724	0.0654603192103924	-1.1259577655202	0.260183396617667	0.363302364241176
BSN	1157.8304608449	1.02299675381059	0.158305950993179	6.46214970057992	1.03225901775556e-10	1.1080902957372e-09
BSND	0.0301114771216367	-0.10289571226313	2.71559428790706	-0.0378906792967342	0.969774844557764	0.997580121386579
BSPH1	0.0105203863933874	0.0125173692359183	2.90030575372639	0.00431587918612914	0.996556437321534	0.997580121386579
BSPRY	26.1110183665454	-0.16157516750885	0.209425749053655	-0.771515289972555	0.440401563088264	0.562368241144615
BST1	43.5207609556029	-0.88544523372085	0.153237070869343	-5.77827041914563	7.54724372750824e-09	5.61863178950098e-08
BST2	1153.80182423402	-1.05583953493037	0.151133367800433	-6.98614442526397	2.82543224759461e-12	4.00492178222684e-11
BSX	0	NA	NA	NA	NA	NA
BTAF1	793.607439632794	0.573137929447174	0.0815690392590501	7.02641510373784	2.11907414205375e-12	3.0615830265847e-11
BTBD1	2223.23239319102	-0.00226062444491253	0.0455213631472594	-0.0496607370389925	0.960392745135296	0.997580121386579
BTBD10	588.591366510194	-0.0068617444030923	0.0550712030986139	-0.12459768476104	0.900842061407206	0.97562857172852
BTBD11	284.193437109664	-0.234876831565274	0.230480893723367	-1.0190728948109	0.308168361171448	0.418113564861227
BTBD12	353.962923482696	0.0852684294748509	0.0592215741793067	1.43982038060456	0.149918223547886	0.22749697858143
BTBD16	5.97666972662781	-0.819779780731388	0.267429801201241	-3.0654017504747	0.00217377784456033	0.0052958662738101
BTBD17	487.674167818923	1.09478219643349	0.164490711545386	6.65558672674001	2.82172105983949e-11	3.3290159477162e-10
BTBD18	3.58768828829059	0.466071317406721	0.126534270563426	3.68336036815497	0.000230179392633998	0.000698288072911178
BTBD19	20.6520086581275	-0.513130563940013	0.164390346153157	-3.12141543556303	0.00179983931723816	0.00446523272568378
BTBD2	2958.3865554814	0.253345540183887	0.0586944227400674	4.31634776111261	1.58631997067084e-05	6.14436566899687e-05
BTBD3	1657.02781401923	-0.151692291738952	0.0751139855624491	-2.01949464674373	0.043435833151823	0.0770444474089033
BTBD6	832.015991898221	-0.0543664270604609	0.0817033967747668	-0.665412078402735	0.50578696161992	0.630091906805513
BTBD7	668.410697695324	0.0852390561388854	0.0587962739781867	1.44973567832732	0.147132242386434	0.22378706134787
BTBD8	14.7975743873414	0.157180778327878	0.183604965217177	0.856081305546156	0.391952808344519	0.510639053117291
BTBD9	715.509897265728	0.278044779306022	0.0650555522868463	4.27395924762966	1.92032149066832e-05	7.32284598965477e-05
BTC	5.75952868971129	-0.305893936216746	0.315225058435904	-0.970398539172434	0.331847876560755	0.444089200368657
BTD	355.073675506628	-0.337310080832307	0.0757887135781077	-4.45066375859086	8.56052864483788e-06	3.48901512521728e-05
BTF3	5495.63690329132	0.159534548622502	0.0580444230553146	2.74849055645656	0.00598703595410092	0.0132073945382487
BTF3L1	0	NA	NA	NA	NA	NA
BTF3L4	1264.74084586457	0.139137663467589	0.0554028686820957	2.51138012845449	0.012026012127728	0.0245570367596973
BTG1	1894.51312004365	-0.0760311353868661	0.0681919245937594	-1.11495805170198	0.264868398083121	0.368919108028302
BTG2	3805.22904543717	-0.0780391655977967	0.118804805267056	-0.656868764040106	0.511265304375674	0.635657105274425
BTG3	575.469252002649	-0.488165443631385	0.0820072929413795	-5.95270769369665	2.63742109092594e-09	2.14824069530676e-08
BTG4	0.109028105569696	-0.212950261777239	1.07598584534698	-0.197911768726444	0.843114096192395	0.933120335144274
BTK	240.272738504151	-0.765280433242027	0.120422643544674	-6.35495460584312	2.08488179795089e-10	2.1075905727211e-09
BTLA	4.03217789943804	-1.15366749551553	0.21291793621551	-5.4183668883011	6.01458940104793e-08	3.79858546423928e-07
BTN1A1	1.00263484014171	-1.38286518685476	0.478213121793301	-2.89173409058499	0.0038312205825292	0.00883674427852002
BTN2A1	545.924341172747	-0.0206823490450584	0.0510741340721378	-0.404947620175925	0.685516013640172	0.801792648530433
BTN2A2	291.586505611035	-0.878552865651709	0.105012705256566	-8.36615782352467	5.95274526232341e-17	2.0680749583366e-15
BTN2A3	15.2049717451889	-0.642031421583905	0.133502048069397	-4.80915035288572	1.51573170114799e-06	7.24414194589857e-06
BTN3A1	693.157441666661	-0.699020419065485	0.103488586657339	-6.75456532593308	1.43264108295779e-11	1.79333170885339e-10
BTN3A2	1137.46376954698	-0.902981971636268	0.131140976541734	-6.88558218375708	5.75516770315341e-12	7.7357392092731e-11
BTN3A3	589.36343302103	-0.971191959478639	0.121460599438935	-7.99594242054525	1.28586468406669e-15	3.30191076316992e-14
BTNL2	0.553541155926851	-0.127638465718554	0.599388923604978	-0.212947655006506	0.831367791413264	0.924743651104013
BTNL3	0.613132257062544	-0.0776412978717673	0.435727746656827	-0.178187637733607	0.858575618020723	0.945029581251702
BTNL8	1.81851191526319	-0.0902955688549077	0.263976340213409	-0.342059325399804	0.732306246735232	0.8434873086029
BTNL9	173.985974754711	0.493675850649115	0.158778538696093	3.1092101911457	0.0018758821465748	0.00462972559664973
BTRC	1006.76037330477	0.439915661724697	0.0660359700892314	6.66175814681391	2.70571028158478e-11	3.20183930710914e-10
BUB1	155.990128870823	-1.12141213190816	0.233139615230486	-4.81004539189751	1.5089602451908e-06	7.21708838742788e-06
BUB1B	148.710144821917	-0.981506088622253	0.24422044476741	-4.01893498129125	5.84617994303392e-05	0.00020173875192941
BUB3	1294.11689801147	0.169819829021916	0.0471404866941421	3.60241993519804	0.000315268519832512	0.000928745987233324
BUD13	417.79794397928	0.0481375181070827	0.0517867413808433	0.929533637829729	0.3526126010401	0.467416145975076
BUD31	1311.39797456507	-0.262771415702298	0.067580840591801	-3.88825314099715	0.000100968291635819	0.000330790385608019
BVES	256.616590716118	-0.208448796022725	0.137751535542492	-1.51322303015944	0.130223016194968	0.201400300399931
BYSL	378.279947476996	0.0729393440560071	0.0759691126870322	0.960118414920722	0.336995621431721	0.449825360533168
BZRAP1	1563.670142854	1.04525326776656	0.122483210649946	8.53384935143367	1.41557144675625e-17	5.55120472782279e-16
BZW1	3015.4936391297	-0.275170955515835	0.0433619843690154	-6.34590320346271	2.2112424193728e-10	2.22264645454233e-09
BZW2	730.209911486624	0.0274214348949309	0.101967793234525	0.268922509991579	0.787989314382123	0.88999704694897
C10orf10	1097.46326791048	-1.33756850188606	0.171355406946634	-7.80581439313805	5.91185319553985e-15	1.34448096594016e-13
C10orf105	275.659611757689	-1.60397041954658	0.272469041866901	-5.88679876640848	3.93747648482928e-09	3.12286589352907e-08
C10orf107	82.7950349143401	-0.861680833868925	0.192238566088467	-4.48235154579953	7.38249974067882e-06	3.05488152751232e-05
C10orf108	2.44791112787569	-0.7095235836786	0.211875915578035	-3.34876940469092	0.000811713227889231	0.00217730399278298
C10orf11	36.6399172894738	-0.928812502974669	0.153632187319736	-6.04568950803026	1.48772363352403e-09	1.27062811644975e-08
C10orf110	33.6056058264622	0.16088159265156	0.132858211326783	1.21092698031174	0.225923391177668	0.322346039096101
C10orf111	9.08485250721693	0.341724384069862	0.115206349480243	2.96619401284359	0.00301510220784872	0.00712122419182882
C10orf113	0	NA	NA	NA	NA	NA
C10orf114	55.205382134481	-0.812620401192574	0.161730391499601	-5.02453740238786	5.04647448178082e-07	2.64610674333893e-06
C10orf116	434.461654541491	-0.52661135575262	0.169710966619927	-3.10298954888392	0.00191576405616395	0.00471978782134186
C10orf118	207.2829026493	0.132206126521056	0.101999330675153	1.29614700063186	0.194924844865501	0.284149979538415
C10orf119	1033.70541148177	0.138844517716637	0.0514950796420997	2.69626765666996	0.00701212970979675	0.0152071222926381
C10orf12	49.316229673113	0.177937609481303	0.102833372439579	1.73034886690945	0.0835679636415675	0.136845875598567
C10orf120	0.290214337489419	0.886769617333123	0.843589308551837	1.05118641066636	0.293172983245202	0.401598358409403
C10orf122	0	NA	NA	NA	NA	NA
C10orf125	71.7492348244342	-0.560946771744767	0.141199431386667	-3.97272684624802	7.10545144576949e-05	0.000240634663211203
C10orf128	15.6791911968899	-0.325600451023261	0.164736719550353	-1.97648983124092	0.0480993263207463	0.0844402693200636
C10orf129	0.00553608702506999	0.0413709078295113	2.90030575372639	0.0142643263650244	0.988619100171593	0.997580121386579
C10orf131	1.06341799414598	0.297236019485691	0.234460876474558	1.26774250764155	0.20488991941428	0.296481144062983
C10orf137	305.091577285588	0.46990646717138	0.057404587658683	8.18586956787072	2.70344410442143e-16	7.9352598787912e-15
C10orf140	32.5561445028313	-0.651862287370645	0.162095221949601	-4.02147749656262	5.78342339336128e-05	0.000199820815345881
C10orf18	1324.10979864731	0.362449117071259	0.077240440293214	4.69247865101958	2.69914709411476e-06	1.22056558849876e-05
C10orf2	430.830406915965	0.501511212072195	0.0828776975245804	6.05122037715218	1.43752633500338e-09	1.23315969494788e-08
C10orf25	122.435375299727	0.0208562588317527	0.0822655548367966	0.253523590439871	0.799863633944998	0.899350537994001
C10orf26	1724.47655713742	0.0281116742670206	0.064801546867967	0.433811778047491	0.664425128013045	0.781807660602499
C10orf27	0.0200658718477411	0.130609025673116	2.90030575372639	0.0450328471421697	0.964081127269874	0.997580121386579
C10orf28	233.158680263438	0.0996577161792006	0.0498720936802285	1.99826614094426	0.0456878142528453	0.0806498958235626
C10orf32	823.52661839044	0.119555346009366	0.079352839263757	1.50662972010342	0.131905595040466	0.203501943112378
C10orf35	155.015150211575	-0.00984532697981237	0.180441335806238	-0.0545624811289609	0.956487029930494	0.997580121386579
C10orf4	552.69621553947	0.545215815926205	0.083704616248039	6.51356926732196	7.33857405432211e-11	8.07160317825835e-10
C10orf40	0	NA	NA	NA	NA	NA
C10orf41	40.5919837777904	-0.637044050748549	0.0966815880483438	-6.58909378308936	4.42519211246361e-11	5.05254799483982e-10
C10orf46	938.573156609282	0.159023057879467	0.0526417392809626	3.02085493472622	0.00252062090588786	0.00605682424556213
C10orf47	12.8526828938497	-0.236188799505585	0.136805345239832	-1.72645885357421	0.0842648956192836	0.137859717587496
C10orf50	1.08703726492693	-0.4386103928829	0.302678669578317	-1.44909581337185	0.147310827052951	0.223971294115143
C10orf53	0.0673984778971836	-0.0704675943695194	1.70151284731561	-0.0414146707623703	0.966965317254545	0.997580121386579
C10orf54	2546.41628288582	-0.17462159937065	0.11515359204886	-1.51642338084041	0.129412330684876	0.200264837869054
C10orf55	7.0579231636894	-0.785391142834709	0.250036040331042	-3.14111174451038	0.00168307801915454	0.00419907713688198
C10orf57	493.653840838333	0.0635048584722135	0.0556826112064376	1.14047917467045	0.25408672401531	0.356295434999525
C10orf58	3098.29408871202	0.142128223923825	0.115859666935154	1.22672736495413	0.21992507889338	0.314986756880656
C10orf62	1.26407835303094	0.595513372474487	0.271773287570011	2.19121377895198	0.0284363259495105	0.0529873966714692
C10orf67	2.32712318069121	-1.45599778803774	0.324430062506881	-4.48786335269674	7.19410461542284e-06	2.98579852969743e-05
C10orf68	5.7963754058692	0.386262164842741	0.152827773504249	2.5274343529712	0.0114899302246557	0.0235923662113927
C10orf71	0	NA	NA	NA	NA	NA
C10orf72	506.599538314236	-0.451318004024309	0.0909796710102221	-4.96064669187033	7.02588800412363e-07	3.58655204820245e-06
C10orf75	348.933699098752	0.247422713000967	0.127766570693916	1.93652151464333	0.0528038601239464	0.0916181993960399
C10orf76	641.898092516495	0.0475507292512194	0.0492585909333099	0.965328653342871	0.334380224490038	0.447017667556817
C10orf78	126.535253881298	-0.133133136377763	0.0664136379735333	-2.00460538588201	0.0450052504081506	0.0795747374085871
C10orf79	80.4341020665303	-2.03575174628538	0.217037884279422	-9.37970692556367	6.61563591940989e-21	4.99762573912011e-19
C10orf81	30.5079311072829	-3.05708791871107	0.422531462834006	-7.23517225961482	4.64938622218456e-13	7.57030388223702e-12
C10orf82	2.93906421141782	0.83516542044614	0.352406144202676	2.36989460650782	0.0177931564959367	0.0348846816322106
C10orf84	564.619024866082	0.0799388697788178	0.0532004679290343	1.50259711785713	0.132942967069167	0.204940158837149
C10orf88	170.377893593351	0.368265927426686	0.0525925314745399	7.00224760249398	2.51888401593351e-12	3.59392748686267e-11
C10orf90	145.544272903657	-0.553798107293341	0.158787232235074	-3.48767403712585	0.000487241701625466	0.00137309727655875
C10orf91	0.0362362474086209	-0.0731507458572549	2.90030575372639	-0.0252217359370711	0.979878099699186	0.997580121386579
C10orf93	16.672716200634	-0.659277811505636	0.135793572586321	-4.85500012223737	1.20386669239012e-06	5.86437436507959e-06
C10orf95	3.14991033144475	0.653992266933576	0.156070553198291	4.19036297066663	2.7850856970626e-05	0.000103078845871155
C10orf96	0	NA	NA	NA	NA	NA
C10orf99	0.0549392912618185	-0.129963513261436	2.5566093017204	-0.0508343270025579	0.959457537234998	0.997580121386579
C11orf1	230.066722440143	0.0523457328338764	0.0674961635988018	0.775536416336493	0.438022755598441	0.56005947141711
C11orf10	908.460226930451	-0.0625967221871022	0.061315491090785	-1.02089571613184	0.307303848971326	0.417260137693405
C11orf16	0.100486758363885	-0.213842494040446	0.970421703189248	-0.220360378727786	0.825590500172997	0.920155478262236
C11orf17	410.102453392829	-0.00625829331840042	0.0539181277107955	-0.116070301104825	0.907596825978626	0.980166351101204
C11orf2	3006.81432727628	0.548083621728947	0.0734422544391012	7.46278318816346	8.47136826474255e-14	1.56796740246754e-12
C11orf20	20.8835261430789	1.22627677397458	0.199980392154814	6.13198504494014	8.67892641112534e-10	7.72737669039895e-09
C11orf21	6.83561767889319	-1.78706800957257	0.21549088353666	-8.29300980274904	1.10418237216854e-16	3.63467993327979e-15
C11orf24	547.696143308653	-0.344028250784646	0.069316785923698	-4.96313044813333	6.93659587755453e-07	3.54375501057766e-06
C11orf30	394.1574869266	0.190621707244287	0.0704198948290654	2.70692973494202	0.00679086287654434	0.0147881472026647
C11orf31	815.7520035407	-0.00712631124031192	0.073342084702772	-0.097165376048311	0.922595063814305	0.990327575796706
C11orf34	0.0949867181841843	-0.0091882690345995	0.970679951806814	-0.00946580695057784	0.992447491564778	0.997580121386579
C11orf35	6.23978092868116	-1.09588738516004	0.197805838814969	-5.54021757762749	3.02096072026634e-08	2.0013094642417e-07
C11orf36	0	NA	NA	NA	NA	NA
C11orf40	0	NA	NA	NA	NA	NA
C11orf41	1058.21492150714	0.560998199910224	0.127059570776295	4.41523764390748	1.00899084033988e-05	4.05970922341543e-05
C11orf42	1.49256345416439	1.07406250893455	0.235502271401794	4.56073099652644	5.09758506380594e-06	2.17257670880336e-05
C11orf45	44.9546376002903	-0.656129024364995	0.125139287033695	-5.24318972816526	1.57824102245227e-07	9.14113448071169e-07
C11orf46	594.805452950887	0.133398055331501	0.0514782780163153	2.59134649549121	0.00956011813203369	0.0200545369059667
C11orf48	637.254045751382	0.0943653202247084	0.0782972025517614	1.20521956275928	0.228118552216586	0.325097293265668
C11orf49	1213.19799070407	0.0888247749076953	0.0651249431582889	1.36391328114948	0.172594860329388	0.256459013359854
C11orf51	395.533962974927	0.0246462787930749	0.076072360485316	0.323984672433456	0.745949638535	0.855460927040138
C11orf52	19.5090798202061	-0.128874126458837	0.200789061029341	-0.64183838401438	0.520978124345815	0.645099342026679
C11orf53	0.149744510239707	-0.590727659411554	1.27513448803138	-0.463266945531017	0.64317303570965	0.762914154097808
C11orf54	527.380678639973	0.0819452443381404	0.0494987820713588	1.65550021453065	0.0978230729416952	0.156964350308716
C11orf57	1036.21868540603	0.0871974906256229	0.040511782479176	2.15239827253823	0.0313659996494327	0.0577974220636705
C11orf58	2753.24944792795	0.0902317497481578	0.0432740357255794	2.08512444553031	0.037058005822807	0.0669751978381407
C11orf59	2180.32036014737	0.0535808365759683	0.0539922009580543	0.992381040691312	0.321011683982337	0.43207995309501
C11orf61	237.180316885726	0.130710739456352	0.0770368814342823	1.69672937199382	0.0897478369569867	0.14553501475095
C11orf63	48.5709588108899	-2.6156182635818	0.254408890936451	-10.2811590190657	8.56908543519064e-25	1.40345777421736e-22
C11orf64	0	NA	NA	NA	NA	NA
C11orf65	6.37750788226982	0.254082125226977	0.117595246731905	2.16064962052621	0.0307224153010152	0.0567779133526254
C11orf66	66.0893739796016	-0.507683851309591	0.15959250308034	-3.18112593956884	0.00146703839378761	0.00370244642421853
C11orf67	248.016291174261	-0.108257496791888	0.0887593625516431	-1.21967411301428	0.222588438752154	0.318333480428492
C11orf68	1240.60117201572	0.150529513590367	0.0546933380924532	2.75224586467758	0.00591880655789078	0.0130701948576129
C11orf70	55.3500637218125	-1.43322215484118	0.223008370135722	-6.42676395495345	1.3034898787697e-10	1.37324420201197e-09
C11orf71	387.516719920862	-0.120144544378156	0.0711751276139916	-1.68801305183102	0.0914087235269434	0.147896066872001
C11orf73	612.239191282261	0.120949605625397	0.0564520125221623	2.14252070425149	0.0321516044264487	0.0591053358113078
C11orf74	215.224963546681	0.0708743838661203	0.0657109522247996	1.07857794578378	0.280775917185297	0.387283979189062
C11orf75	131.667327259094	-0.297143144560586	0.106461248479603	-2.79109205278122	0.00525305301275164	0.0117653416707113
C11orf80	85.1925979297812	-0.0176505677187702	0.0990407072945168	-0.178215283401428	0.85855390743846	0.945029581251702
C11orf82	72.1369778265952	-0.836048473626751	0.16894076720979	-4.9487668810486	7.46851326146888e-07	3.78831389663332e-06
C11orf83	356.010464758759	0.0663929183258941	0.0991181867682545	0.669835884721394	0.50296241521075	0.627214631291671
C11orf84	397.73239186643	0.160830972555769	0.0614524725615195	2.6171603167759	0.00886646875648104	0.0187589531115735
C11orf85	0.0151315130820234	0.0422634085171188	2.90030575372639	0.0145720527785106	0.988373595537882	0.997580121386579
C11orf86	1.37467830796367	-2.39031198415795	0.46518556506564	-5.13840532394996	2.77079731674173e-07	1.52939223175577e-06
C11orf87	140.705929553758	0.82103801917809	0.298014277643943	2.75502914044621	0.00586869083087573	0.0129668727234744
C11orf88	5.66859311547654	-4.89850016062191	0.558959017603907	-8.76361236932957	1.89091239054373e-18	8.90190398350177e-17
C11orf9	1866.58704824507	-0.512163442690136	0.213979488523872	-2.39351652919293	0.016687729392707	0.0329460945972304
C11orf90	1.35171098340067	0.793825785488244	0.337459527437615	2.352358493227	0.0186547862184306	0.0364127975360253
C11orf92	101.59989728901	-0.166228178712218	0.234768755788764	-0.708050686530807	0.478913781682338	0.602117765771434
C11orf93	98.1045186460788	-0.371405047333205	0.178280095547385	-2.08326704219479	0.0372268891177326	0.0672430091663214
C11orf94	0.0197600295927537	0.0134098699235255	2.90030575372639	0.0046236055996152	0.996310909620892	0.997580121386579
C11orf95	810.663563121489	0.390876812231896	0.0776273493380907	5.03529768264415	4.77106806540721e-07	2.51455155745772e-06
C12orf10	752.545088588369	0.115769330935847	0.0580458516651418	1.99444624576626	0.0461033088861525	0.0813244176116493
C12orf11	462.941411969803	-0.211287273429007	0.0652735165775994	-3.23695251163344	0.00120813514492046	0.00311709742844847
C12orf12	0	NA	NA	NA	NA	NA
C12orf23	1138.03604761658	0.0884803314133528	0.0555173362387014	1.59374237684828	0.110993748562377	0.175104121912716
C12orf24	306.198167224738	0.379399180329503	0.0653465232158722	5.80595816974314	6.39989397550136e-09	4.84169329236332e-08
C12orf26	53.0486213912567	-0.19947148615385	0.0692235958633216	-2.8815533730391	0.00395720208249146	0.00909717723375307
C12orf27	0.0540535945139318	-0.159709628411589	2.5608062850169	-0.0623669308162973	0.950270629060626	0.997580121386579
C12orf29	509.487371305131	0.180449460027532	0.0561043709884211	3.21631731803523	0.00129847172737402	0.00332464713170252
C12orf32	610.697422125868	-0.397618768998525	0.0839472454906144	-4.73653145704442	2.17407008634758e-06	1.00171692631003e-05
C12orf34	1117.00110971232	0.710677850392179	0.128052864567033	5.54987858174896	2.8586806678699e-08	1.90415879073084e-07
C12orf35	497.925090007661	-0.382219626646752	0.0794691189099114	-4.80966231776204	1.51185484117509e-06	7.22738554194323e-06
C12orf36	0.00495132054472983	-0.0172286700452834	2.90030575372639	-0.00594029440625272	0.995260358681341	0.997580121386579
C12orf39	56.1308168778872	-0.478494612392426	0.269191220855241	-1.77752681113527	0.0754816035936944	0.125203102471583
C12orf4	465.124164389389	-0.29979701092926	0.085805904971813	-3.49389719772483	0.000476024283331068	0.00134513837517549
C12orf40	0.20811705430949	-0.292372501291809	1.005130799955	-0.290880053924223	0.771143056697979	0.876002691323869
C12orf41	537.834544985337	0.0461578679649546	0.0514774010927327	0.896662748801259	0.369898903811218	0.486328226880777
C12orf42	0.807367941657096	-0.356784967649512	0.324933439257402	-1.09802477844355	0.272193669587469	0.377503353039192
C12orf43	323.563044300461	0.0820590181374631	0.0441824295996997	1.8572771773968	0.063271729698734	0.107201431142089
C12orf44	665.06975610792	0.0677446655461607	0.0657599427955147	1.03018133329005	0.30292489068794	0.412579043990773
C12orf45	79.9567997614177	-0.149469013000032	0.0787577796634572	-1.8978317270844	0.0577182523267843	0.0990254170641747
C12orf47	371.167147357656	0.215293050857245	0.0593025138482386	3.63042031250484	0.000282960057645939	0.000842353982514029
C12orf48	40.193991826209	-0.885137254340966	0.146365153936931	-6.04745891035222	1.47148178574207e-09	1.25785877211022e-08
C12orf49	612.215769995881	-0.187414360259233	0.0876513516099413	-2.13817992326289	0.0325021431875091	0.0596878140699663
C12orf5	423.433898515361	-0.737867156776876	0.0820642173216812	-8.99133850121949	2.44237571008572e-19	1.36005435970202e-17
C12orf50	0.125674463185898	-0.123711061457134	0.811407957439104	-0.152464688475056	0.878820439313249	0.960155298066889
C12orf51	2131.19098164964	0.647455453073186	0.0661723103591594	9.784386393025	1.31389807952845e-22	1.43060746201171e-20
C12orf52	382.374716330414	-0.128679327340422	0.0562018491382777	-2.28959241223225	0.0220449552645495	0.042203788886321
C12orf53	1793.58059437132	0.651385603306675	0.115156521874132	5.65652377047869	1.54469593907035e-08	1.08023408153861e-07
C12orf54	0.864444758895723	0.227695921681579	0.339292981988562	0.671089394030718	0.502163583035549	0.626378766935223
C12orf56	0.391226623621499	-0.87077063505574	0.727081292522891	-1.19762486534932	0.231063091425697	0.328764757766597
C12orf57	1667.37043434911	0.0439319585375124	0.101242491619299	0.433928065527163	0.664340678617079	0.781789628441425
C12orf59	64.7720268267913	-0.662332411377399	0.138708141588757	-4.77500746380906	1.79700589291715e-06	8.44961275101455e-06
C12orf60	22.094310022807	-0.474062333975019	0.0788526053306749	-6.01200596970766	1.83241572953047e-09	1.5347564490137e-08
C12orf61	8.38907335319914	-0.355173101799756	0.127922549761665	-2.77646984414777	0.00549527324947362	0.0122249601223879
C12orf62	466.168891344604	-0.104237240571488	0.072422140132432	-1.43930074947908	0.150065330595232	0.227697414815187
C12orf63	18.9003686371887	-2.36069443630664	0.284586698968575	-8.29516785170385	1.0843198806459e-16	3.58193126674384e-15
C12orf65	413.401647735109	0.0878935452237331	0.0520110402252855	1.68990169862058	0.0910467625953307	0.147408323889599
C12orf66	89.809619788557	-0.201071033598331	0.0799942275524882	-2.51356928806393	0.0119516298182642	0.0244271460945858
C12orf68	368.9362483987	0.0267390477344713	0.149843408753089	0.178446606073489	0.858372250261656	0.945029581251702
C12orf69	0.943507305178558	-0.34278447033911	0.266307390590809	-1.28717595699704	0.198032965410933	0.28803451461635
C12orf70	0.592752725403941	-1.33925544777675	0.41029209254058	-3.26415125254769	0.00109792536122984	0.00286153587728931
C12orf71	0.643116790701123	0.515400831312742	0.331501809969324	1.55474515014092	0.120006776925721	0.187339373831181
C12orf72	58.9179562032226	-0.419168821503681	0.0623329752737719	-6.72467212839841	1.7598826727028e-11	2.15317723107204e-10
C12orf73	144.688816698235	0.16148776078086	0.0615930912571956	2.62184861134071	0.00874542690567008	0.0185269967816858
C12orf74	0	NA	NA	NA	NA	NA
C12orf75	168.083426852943	-0.183022817562007	0.11056360659272	-1.65536222272672	0.0978510441772503	0.156964889120459
C12orf76	717.415553614697	0.189826292708853	0.0592243038714712	3.20520935325494	0.00134964275904634	0.00343895115359042
C12orf77	0	NA	NA	NA	NA	NA
C13orf1	347.803471090627	0.150347280063571	0.0639676974313966	2.35036254392014	0.0187551334326437	0.0365757004805108
C13orf15	2736.40745496915	0.527268765136501	0.141068197568985	3.73768697851729	0.000185720965562332	0.000574829540862291
C13orf16	8.27013030619212	0.629383998942173	0.191422578612015	3.28792979128047	0.00100927005504947	0.00264508167826705
C13orf18	218.864771344628	-0.991879524197213	0.169738327566159	-5.84358016494896	5.10906943994311e-09	3.94047342241754e-08
C13orf23	776.076430734701	0.137789932204298	0.0601395652453231	2.29116940972588	0.0219536174641268	0.0420516957617524
C13orf26	23.2191922853249	-2.56131614901262	0.331963774873694	-7.71564954636135	1.20367633078609e-14	2.63295754063085e-13
C13orf27	200.354185715517	0.418792811745747	0.0981944813311735	4.26493226572799	1.99962855056752e-05	7.59406867703836e-05
C13orf28	0	NA	NA	NA	NA	NA
C13orf29	30.4337198225033	-1.3110415176183	0.176481920377865	-7.42875822526885	1.0962190597193e-13	1.98562355705661e-12
C13orf30	4.10819029790179	-3.84335824209537	0.622348243679522	-6.17557497932702	6.59231110846472e-10	5.99552699505261e-09
C13orf31	155.205172415999	-0.815652643222822	0.158330331187601	-5.15158805710057	2.58289896550718e-07	1.43339125392184e-06
C13orf33	13.1145872120751	-2.23899349648603	0.299389266673819	-7.47853629277026	7.51549474124943e-14	1.42348875128233e-12
C13orf34	80.6788140476129	-0.563210393891396	0.0863814308720091	-6.52004010822536	7.02885939548559e-11	7.75282793537149e-10
C13orf35	0.146719669958179	0.229674708136747	0.751300971269181	0.305702663672529	0.759831045028704	0.866891475010797
C13orf36	49.6384339532688	1.12071229868685	0.321806309868989	3.48256781895639	0.000496629409304195	0.00139793575784789
C13orf37	279.111208293028	0.0347046696763855	0.0684632575078471	0.506909413014824	0.612218380688189	0.733563029608558
C13orf38	15.3752651369673	-0.977363578734708	0.148212823957344	-6.5943253265048	4.2719403623513e-11	4.89189880506621e-10
C13orf39	1.38497914332167	-0.188353380162551	0.550183159970587	-0.342346683552837	0.732090007242975	0.843387766944413
C14orf1	820.273621180805	-0.0616787834756497	0.0625908715838079	-0.985427777484502	0.324413990922275	0.435816699963823
C14orf101	294.538631183745	0.0236684845622213	0.0716991992170946	0.330108074018465	0.741318302700446	0.851452278839748
C14orf102	272.859944706785	-0.0327771425385494	0.0581353553924812	-0.563807382224906	0.572885227207084	0.696148954315485
C14orf104	271.286973311614	0.132445494081473	0.0590761332822704	2.2419458878366	0.0249648697982855	0.0471274957579538
C14orf105	1.50027555549789	-0.248150686754841	0.493116853870114	-0.503228970592442	0.614803298598015	0.735901221560172
C14orf106	228.549531834814	-0.618383141724703	0.110448436681807	-5.59884014932881	2.15790655878598e-08	1.46746681195878e-07
C14orf109	255.368863158032	-0.0186894377861043	0.0522893437989122	-0.357423452433785	0.720774822234636	0.833688019540104
C14orf115	0.125516038041774	-0.0651118358550662	1.27646890740168	-0.0510093394970387	0.959318078395838	0.997580121386579
C14orf118	224.907118823807	0.243376822312197	0.0811827763613798	2.99788739952451	0.00271858096404062	0.00648136305677696
C14orf119	593.160272924562	-0.249094980963883	0.0460196723416754	-5.41279344873349	6.20490507888603e-08	3.90864899765639e-07
C14orf126	380.449790499166	0.00467480400917178	0.0544347854339003	0.085878982931757	0.931562618967205	0.996193048987226
C14orf128	148.666829191074	0.0908945740140291	0.0957640332208458	0.949151481584041	0.342543573960621	0.456272160777235
C14orf129	255.378736167551	-0.114275797776325	0.0623958894891061	-1.83146355812873	0.0670313821871907	0.112818308000484
C14orf132	4840.32983743334	0.47857720341969	0.115902171693918	4.12914785310104	3.64110211261498e-05	0.00013156299624558
C14orf135	1107.49027789794	0.0259818597587783	0.0565308379337315	0.45960507058529	0.64579971890894	0.765424259397668
C14orf138	92.4040818797402	0.250006633974241	0.0813681680035182	3.07253610482457	0.00212248155624152	0.00518255644339102
C14orf139	160.883809540049	-0.258609479944679	0.109964557832398	-2.35175301062763	0.0186851773673318	0.0364538645534832
C14orf142	162.441469452717	-0.497583723806626	0.0623233017600023	-7.98391147058843	1.41767714825099e-15	3.6118336757401e-14
C14orf143	46.1375140267318	-0.308585541226382	0.0714689599248041	-4.31775614967755	1.57623432727899e-05	6.11237704708863e-05
C14orf145	62.3869737320003	-0.14821629108873	0.0845963132439902	-1.75204196737569	0.079766591834994	0.131415965753511
C14orf147	1170.0579698069	-0.240013601890833	0.0750814140312919	-3.19671126320027	0.00139003992931656	0.00353080649320732
C14orf148	11.4166744973823	-0.156955108404258	0.117022162360024	-1.34124259233374	0.179841701842961	0.26541835293952
C14orf149	184.229143545515	-0.125963493696438	0.0914690679508395	-1.37711574544673	0.168476465380499	0.251193873184358
C14orf153	398.861134087785	-0.19920649519902	0.0616688791578278	-3.23025970180511	0.00123677820374245	0.00318131281390265
C14orf156	463.391159226184	0.0867631641719297	0.0738640380103603	1.17463337381799	0.240141425273939	0.339962925750973
C14orf159	1291.70670602619	0.0507667575579054	0.0884202928252262	0.574152787055934	0.565864415025888	0.689106430462727
C14orf162	13.3759871433431	0.64940594489643	0.257335322905724	2.52357872041664	0.0116167048244105	0.0238275707248748
C14orf165	0	NA	NA	NA	NA	NA
C14orf166	1471.43339569954	-0.150390861109887	0.0543807513783784	-2.76551642443253	0.005683274299254	0.0126072178570977
C14orf166B	0.476041167188464	-1.21005637730324	0.48218714993994	-2.50951601977357	0.012089673179754	0.0246678947103649
C14orf167	493.735203787422	0.0315241544274376	0.104566480430044	0.301474758429186	0.763052495047279	0.869768747733699
C14orf169	99.6510380048885	-0.654070665409	0.103852736904263	-6.29805901034612	3.01395780615564e-10	2.9429878578143e-09
C14orf174	31.027301812837	-0.9623764934408	0.145838114669169	-6.59893674314108	4.14116946170144e-11	4.76173408900065e-10
C14orf176	19.0308498562381	0.0813586707416963	0.105645369347388	0.770111091894325	0.441233996957502	0.563275118523457
C14orf177	0	NA	NA	NA	NA	NA
C14orf178	2.65565839287992	0.393992606696679	0.162738277703848	2.42101988699713	0.0154770305482643	0.0308054866611183
C14orf179	291.628004643691	-0.0132937239887781	0.0757160394377544	-0.175573419945014	0.860629085748791	0.946434626262142
C14orf180	0.88264457108402	-0.512079388598205	0.436209818097213	-1.17392907576437	0.240423435151157	0.340247717505546
C14orf181	21.5301204667823	-0.527897863522945	0.163004493969686	-3.23854791157548	0.00120139840465463	0.00310176909613443
C14orf182	0.344162887468608	-0.806947588598119	0.568512434799317	-1.41940182695031	0.155781900102741	0.235017356838952
C14orf183	0.0100389460482474	0.0711169471107125	2.90030575372639	0.0245204999574061	0.980437432028827	0.997580121386579
C14orf184	0.10601578272208	0.108904376557395	0.970280762382487	0.112240065741368	0.910633061992661	0.982153261986321
C14orf19	3.27765911268469	0.185759657926608	0.174926571331389	1.06192933705135	0.2882677656029	0.395936487075441
C14orf2	846.001678319412	0.0779417012210986	0.0699483893244866	1.11427442395466	0.265161475710465	0.369248153872318
C14orf21	314.839889256431	0.208764555371572	0.0853071927872648	2.44720929795661	0.0143967209905832	0.028849690736836
C14orf23	31.1003520959161	-0.303420198282077	0.226080534381542	-1.34208899988715	0.179567140117086	0.26507335915186
C14orf28	76.6928532692106	0.135275060284289	0.0621574808029586	2.17632790996011	0.0295307500252214	0.0548408116237794
C14orf33	45.1972189718937	0.0812580674200961	0.0739177086114312	1.09930446907184	0.271635283679446	0.376863018145815
C14orf34	0.12077929045595	-0.0948574539877012	0.973744964715665	-0.0974150906294029	0.922396761136339	0.990278333951044
C14orf37	329.01186912434	0.077721929539815	0.113194776999767	0.686621163978042	0.492321488149298	0.615915386355339
C14orf39	1.62290934453849	-0.142440249202552	0.520379904145134	-0.273723577847512	0.784297057014662	0.887119124903706
C14orf4	1235.83725935196	-0.0170192646477778	0.0736974475583122	-0.230934248222254	0.817365883532285	0.913458898760264
C14orf43	937.715828377644	0.17000519671736	0.0661490048720055	2.57003407755431	0.0101688511441254	0.0211651974368865
C14orf45	117.733878188961	-0.547405992207259	0.0929389088978631	-5.88995501129501	3.86300768357745e-09	3.07061096733402e-08
C14orf48	0.0158136612843101	0.0422634085171196	2.90030575372639	0.0145720527785108	0.988373595537882	0.997580121386579
C14orf49	81.1874739756177	0.0532205340255756	0.132731532206024	0.400963758505909	0.688446806735457	0.804570861862089
C14orf50	13.5923002456461	-2.20972958996452	0.245497301399864	-9.00103413505689	2.23601410294719e-19	1.25590532756314e-17
C14orf53	0.0515622471202816	-0.0425087865164869	2.29063553796735	-0.0185576386168391	0.985193996497475	0.997580121386579
C14orf64	59.7172022294152	0.00315686854824951	0.108675182787738	0.0290486610398938	0.976825781053189	0.997580121386579
C14orf68	0.924062531194433	0.611758666063276	0.324251351283758	1.88668039050951	0.0592033267464565	0.101199161400494
C14orf70	0.250257073578275	-0.318549565590333	1.37925529182569	-0.230957653364285	0.817347700363496	0.913458898760264
C14orf72	0.212572353717477	-0.907227589418849	0.85390988183864	-1.06243950177202	0.288036208980319	0.395674717850456
C14orf73	0.270666573253619	0.44503758870168	0.841196039405956	0.529053357188843	0.596768436381686	0.719474008726899
C14orf79	255.97045094638	-0.218680931250899	0.0770713751821865	-2.83738198175348	0.00454851588754311	0.0103406712525622
C14orf80	182.511443421404	0.0844945458520211	0.112681410600525	0.749853462090293	0.453342965703107	0.575350289871301
C14orf86	19.797854778739	-1.25065560619506	0.230085893994237	-5.43560313274305	5.46113862794905e-08	3.47267836406939e-07
C14orf93	248.780789673375	0.16129488755639	0.0614917655131662	2.62303230701441	0.00871510080470905	0.0184707985607129
C15orf17	1767.25257759398	0.330932450438623	0.0452425223765332	7.31463307205599	2.58085635830636e-13	4.36260975051093e-12
C15orf2	0.664241480949636	-1.16817191626138	0.611695813390925	-1.90972684574321	0.056168392561356	0.0966727279248348
C15orf21	30.0438410530345	0.110731414462222	0.122441830709179	0.904359350238959	0.365804885478387	0.481823154556583
C15orf23	242.699022076566	-0.27972252419939	0.0976117778293414	-2.86566365678167	0.00416136115364171	0.00952942414339994
C15orf24	1278.97622010653	-0.0583932318676144	0.0502058643336754	-1.16307592036509	0.24479870087399	0.345258461540926
C15orf26	10.4383903155155	-4.87131874448402	0.448054600814444	-10.8721542767985	1.56462142273991e-27	4.55141366107476e-25
C15orf27	24.1067990782371	0.428007451804541	0.183558724261736	2.33171947302404	0.0197154537103002	0.0382221112901954
C15orf28	4.97364501772762	0.817050072731551	0.154091450236171	5.30237123136477	1.14308092965492e-07	6.80887754247384e-07
C15orf29	440.691111262769	0.2937106747852	0.0517854968040303	5.67167822868779	1.41405384348885e-08	9.98909366060086e-08
C15orf32	0.0258356676770315	0.0431559092047273	2.90030575372639	0.0148797791919971	0.988128092005062	0.997580121386579
C15orf33	35.4090910337859	-0.236889410763322	0.0868225178148488	-2.72843286195057	0.00636360425716347	0.0139716849129341
C15orf34	7.06841474939694	-0.303336921524194	0.128958346655086	-2.35220851842574	0.0186623099113273	0.0364201882619173
C15orf37	47.2265564440954	0.0983955509392615	0.0947757031011797	1.0381938378681	0.299179820921912	0.408563250404153
C15orf38	375.875064734548	0.0207188794648908	0.0692281102406286	0.29928419818011	0.764723210388198	0.871040144629364
C15orf39	516.143491734874	0.483123233761124	0.0832123309481223	5.80590915140114	6.40176686219613e-09	4.84169329236332e-08
C15orf40	231.614631588078	-0.082724820462051	0.0401348250588703	-2.06117306704861	0.0392865320221453	0.0705319186727719
C15orf41	124.53485859443	-0.204069023086424	0.0592679119844464	-3.44316201218591	0.000574954766321658	0.00159582289883354
C15orf42	113.050530554247	-0.0435442782499574	0.149197135101872	-0.291857335063607	0.770395705573139	0.875459874154305
C15orf43	0.0387674021187685	-0.219203440200438	2.90030575372639	-0.0755794246585207	0.93975370637914	0.997580121386579
C15orf44	775.487773831807	-0.0979148937395049	0.0391062666247718	-2.50381594026879	0.0122861931457236	0.0250243394722701
C15orf48	3.14571783128458	-0.992975134543041	0.289087298409443	-3.43486254846334	0.000592854452277453	0.00164083119495705
C15orf5	0.102033999691665	-0.213842662630935	1.07408752106055	-0.199092400235492	0.842190465965451	0.93249797920285
C15orf50	0.490906743761376	1.91255513194805	0.392993862582947	4.86662849994095	1.13518125048351e-06	5.56315880611607e-06
C15orf51	9.59635497928049	-1.09078964134337	0.263252616111192	-4.14350921733154	3.42031317089289e-05	0.000124253315378756
C15orf52	845.075257531394	-0.300207554763832	0.102557153004386	-2.92722200226243	0.00342004658892239	0.00797710723050471
C15orf53	0.0100185138657514	-0.0460822086388766	2.90030575372639	-0.015888741585148	0.987323151783713	0.997580121386579
C15orf54	0.394235472546977	-1.6873924415305	0.735046932777321	-2.29562544415335	0.0216973066565187	0.041597531648195
C15orf55	0.0349521685484778	-0.0145479905620296	2.36997624479317	-0.00613845416973755	0.995102252949147	0.997580121386579
C15orf56	3.66262154569523	-1.43137898454897	0.191290115877005	-7.48276500323366	7.27749467985623e-14	1.38109417050047e-12
C15orf57	297.727706948294	-0.0496724019900308	0.0496751685498881	-0.999944306986003	0.317337460771332	0.428169408821964
C15orf58	39.0075810975882	-0.0359003534278781	0.0576397543411978	-0.622840153262388	0.533389569001081	0.657377178438793
C15orf59	684.665749236951	0.526040479511112	0.120107808949313	4.37973587323624	1.18823243170649e-05	4.72432682455315e-05
C15orf60	0	NA	NA	NA	NA	NA
C15orf61	93.888600135746	0.150707616976767	0.0618151430310563	2.438037179677	0.014767255080953	0.0295254207558243
C15orf62	28.0981942941192	0.560779415283511	0.106636088277385	5.2588145752758	1.44986993352464e-07	8.45034838648184e-07
C15orf63	944.687591123266	0.143760467481794	0.081346741603982	1.76725538905613	0.0771854672960378	0.12774666759509
C16orf11	0.50794227896314	1.60605017777788	0.851241144331432	1.88671587184532	0.0591985517151285	0.101199161400494
C16orf13	600.272853971462	0.0131070245926444	0.0867509488419271	0.151087968115799	0.879906323596558	0.96085691656751
C16orf3	2.25867578034253	-0.126967214608373	0.207383015274078	-0.612235358043055	0.540382051103951	0.664105314081342
C16orf42	1278.50630210773	0.0807588221803881	0.0747700579859434	1.08009575431345	0.280099542316509	0.386515157161482
C16orf45	2454.22370890886	0.435644473833738	0.0653657731349884	6.66471844422429	2.65173220552764e-11	3.14751892117745e-10
C16orf46	84.8398221945326	-0.144309708347725	0.0768164213419204	-1.87863097273672	0.0602948989779001	0.102848554269147
C16orf48	481.302808830644	-0.173108835308736	0.0997955277422298	-1.7346352008466	0.0828054404354072	0.135749152233583
C16orf5	3247.26997035732	0.172344555839828	0.0804117455640638	2.14327589372527	0.0320909513202502	0.0590049661539317
C16orf52	396.708740803199	0.249158817135149	0.0521844089135476	4.7745834881051	1.80079565909469e-06	8.46539010992656e-06
C16orf53	1038.38682504517	0.0240586125252119	0.0862757891748734	0.278857055441674	0.78035452647249	0.883582741006729
C16orf54	26.4300319982151	-1.15980523678225	0.138472809077993	-8.37568938266428	5.4901539331138e-17	1.91418783821803e-15
C16orf55	198.092130506746	-0.530991897600287	0.0788418334151229	-6.73490042785377	1.64042233833542e-11	2.02097543452322e-10
C16orf57	880.502798084033	-0.174993113089783	0.0515906088275903	-3.39195673527694	0.000693953969711509	0.00189321988657297
C16orf58	1762.56319491797	0.0284668134516712	0.041097659520791	0.692662642680907	0.488521288241075	0.612182852685562
C16orf59	73.4773961597164	-0.120043793337532	0.151371530113603	-0.793040760355927	0.427754075265372	0.54953048097832
C16orf61	406.115303574153	-0.150012258717904	0.058563604136849	-2.56152709398419	0.0104213112342204	0.0216375152823006
C16orf62	1549.87964413466	0.00101246648203767	0.0338474799659559	0.0299126104234648	0.97613674868694	0.997580121386579
C16orf63	579.889507767525	-0.234291023880717	0.0346649324280831	-6.75873303277841	1.39203617732628e-11	1.74699195724979e-10
C16orf68	182.610946708879	0.176618814679048	0.0597183257898426	2.95753124929516	0.00310113313891255	0.00731201123607616
C16orf7	800.204051863854	0.308901844715603	0.0650875717237625	4.74594206750576	2.07538110827079e-06	9.60788071263604e-06
C16orf70	469.585458188992	-0.0172828852828768	0.0464747316914623	-0.371877031966853	0.709984406552877	0.824459691129476
C16orf71	35.9333661916952	-1.31996635064654	0.148749071398731	-8.87377876200849	7.07049527839339e-19	3.55164827257441e-17
C16orf72	870.122302765325	-0.0468992717531624	0.0363157863313652	-1.29142933393284	0.196554844344724	0.286183618428109
C16orf73	1.51571055990685	0.745798428340838	0.334546672240081	2.22928066612371	0.0257952362190333	0.0485138621932798
C16orf74	25.6510222321853	-0.686591134061063	0.17934954877812	-3.82822894586967	0.000129068669170291	0.000413673468529677
C16orf75	76.0791363479902	-0.862197943795125	0.182375888708006	-4.72758734667799	2.27203336237938e-06	1.04241831998056e-05
C16orf78	0	NA	NA	NA	NA	NA
C16orf79	82.3585249285518	0.403193020046	0.145453946136314	2.77196343417278	0.0055719295219012	0.0123841836448688
C16orf80	826.861952130607	-0.0181341414435305	0.0517454251092144	-0.350449173144417	0.726001628383148	0.838306282196076
C16orf81	1.90237460034395	0.573836197679129	0.31452943511297	1.82442764847437	0.0680874452465775	0.114408510031537
C16orf82	0.232233084677136	-0.75849617529936	1.31032846704431	-0.57885957176088	0.562683931092064	0.685805128946553
C16orf86	117.220602940619	0.125167835936198	0.0881147645425432	1.42050922550857	0.155459484710065	0.234621756001175
C16orf87	155.637781644461	0.218290267406423	0.076837855576728	2.84092086860031	0.00449834728263054	0.0102409518208701
C16orf88	364.543034341831	-0.0229952447320027	0.0735170235411173	-0.312788026832204	0.754441712494132	0.86271233140757
C16orf89	250.15058779848	-1.18454605154445	0.191351398109007	-6.19042276800953	6.0003061936368e-10	5.49558118956678e-09
C16orf90	0.0101888479899782	0.0711169471107125	2.90030575372639	0.0245204999574061	0.980437432028827	0.997580121386579
C16orf91	204.687209380935	0.0212261073281428	0.0548682106129303	0.386856197623851	0.698862670359892	0.814222968971061
C16orf92	1.81019932570994	0.894714693126242	0.259752579089581	3.44448819820065	0.000572141612503682	0.0015893728659773
C16orf93	88.8921031377731	-0.522589285405408	0.114620648953063	-4.55929442189256	5.1325772402644e-06	2.18414695224352e-05
C17orf100	176.713386142238	0.335966128434135	0.0668845752395908	5.0230733652812	5.08511084776908e-07	2.66421533395213e-06
C17orf101	271.324868454981	-0.269063051299835	0.0675252621045376	-3.98462801793041	6.7585913794614e-05	0.000229886467688835
C17orf102	13.5445348848583	0.192628470805427	0.19446340398396	0.990564120852864	0.321898464630761	0.433004422365486
C17orf103	378.262631463347	-0.0574565797302387	0.0500226959059777	-1.14861021961379	0.250716741136065	0.352228738177893
C17orf104	28.405682059469	0.0944902894497319	0.0849989459225557	1.11166424976404	0.266282536422601	0.370597446078013
C17orf105	0.0151939055243267	-0.0749357472324696	2.90030575372639	-0.0258371887640433	0.979387199397438	0.997580121386579
C17orf106	190.905922820686	-0.365437854991532	0.0868219394415922	-4.20904966350554	2.56447022295204e-05	9.55121816268589e-05
C17orf107	25.1106401561967	0.478306185787302	0.165190604861697	2.89548056433207	0.00378578472444132	0.00875018380371724
C17orf108	466.863617387205	0.0409517027895985	0.0941100170228491	0.435147119138824	0.663455643569419	0.780983903676268
C17orf28	636.958262948624	0.228301989660394	0.109173213582151	2.0911905234758	0.0365109884854508	0.0661214612136626
C17orf37	785.337427977451	-0.141669586698522	0.0563408430903218	-2.51450952679935	0.0119198082092057	0.024382563181929
C17orf39	375.660389954551	0.0867427652603434	0.0336486448233892	2.57789773453368	0.00994034115164569	0.0207694306438223
C17orf42	122.998269491768	-0.268458354844483	0.0494684764022965	-5.42685714961742	5.73549950755338e-08	3.63409900527358e-07
C17orf44	29.5818588901782	-0.493438916515397	0.0850510886836964	-5.80167666460436	6.56550730954634e-09	4.95016392506995e-08
C17orf46	0.40974562508429	-0.587922697745844	0.378215854667866	-1.55446338510091	0.120073923974329	0.187429182945673
C17orf47	1.67739571329821	0.211407901349301	0.224770059845737	0.940551875522892	0.346934553645315	0.461175450180547
C17orf48	112.435659831534	-0.0152715711695892	0.0503999454584221	-0.303007692383072	0.76188399934704	0.868775985681828
C17orf49	1030.94479077247	-0.0427458236571659	0.0726033325206654	-0.588758424346417	0.556023339335275	0.679386551541879
C17orf50	1.69299986502649	0.368213758487093	0.229119493971309	1.60708175504788	0.108036435046402	0.171189440573527
C17orf51	740.927488111964	0.335676779764845	0.081724494043568	4.10741949146718	4.00104171392627e-05	0.00014324082109556
C17orf53	40.6250197838168	-0.58440490559384	0.140867965523083	-4.14860045308225	3.34514056880896e-05	0.000121840384388127
C17orf54	0.0413724392002586	0.132397918301575	2.33373404710862	0.0567322221080031	0.954758505811726	0.997580121386579
C17orf55	3.15946360303878	-0.0789786094242111	0.247385155912205	-0.319253631581031	0.749534190901675	0.858712754565815
C17orf56	348.628354852115	0.100211792914462	0.0778568874130258	1.28712816867241	0.198049618734098	0.288037241185551
C17orf57	13.7857745835169	-0.256298674707229	0.14365453455648	-1.7841321577389	0.0744021929618133	0.123686347733345
C17orf58	208.206799854593	-0.143019635495213	0.0567189971843038	-2.52154732268067	0.0116839958477966	0.0239461409581991
C17orf59	276.763375686273	0.172353090013736	0.069034049441129	2.49663885298682	0.0125376572641164	0.0254726300508316
C17orf60	37.0907017326168	-0.934460195239886	0.146248992825342	-6.38951542289161	1.66412253926166e-10	1.72062325147001e-09
C17orf61	394.220280486547	-0.107028134632507	0.0803693723919867	-1.33170300385696	0.182957801800235	0.269222163615446
C17orf62	1434.65693560071	-0.211785731027652	0.0577377285012384	-3.66806482563839	0.000244393227523515	0.000737431063848149
C17orf63	669.001481677484	0.0573443702584629	0.0480315723250406	1.19388909174991	0.232521355065617	0.330557856044253
[truncated: 18,502 more rows]

## Sheet: DEG
gene_name	baseMean	log2FoldChange	lfcSE	stat	pvalue	padj
A2LD1	52.1615548871413	-1.24594	0.140933672364447	-8.84064693773544	9.51659404502949e-19	4.66026e-17
A2M	17106.9830579143	-0.731513	0.113680536733784	-6.43481105227101	1.23627020660678e-10	1.30737e-09
A4GALT	123.008156731446	-0.669019	0.131890213938414	-5.07254582005087	3.92528579243053e-07	2.10291e-06
ABCA13	28.6184805823761	-2.81605	0.26136956447077	-10.7742131100864	4.55661533292612e-27	1.23345e-24
ABCA5	166.780813486884	-0.946262	0.208646822743971	-4.53523256332843	5.75400468707578e-06	2.43002e-05
ABCB11	1.45219688404992	-3.22401	0.529998899335385	-6.08305088992701	1.17916899640816e-09	1.02809e-08
ABCB4	61.5163942256018	-0.741524	0.155636659190821	-4.76445762092622	1.8936230923706e-06	8.85265e-06
ABCC3	405.226249006782	-3.34021	0.316346606011083	-10.5587005352845	4.63027099634997e-26	1.01398e-23
ABCC8	343.816532393407	1.32795	0.188281217246669	7.0529883852066	1.75115473470968e-12	2.55655e-11
ABCD2	162.67303860839	-0.878359	0.201253731813188	-4.36443374200405	1.27452471492468e-05	5.03353e-05
ABI3	428.640265642006	-0.83198	0.134135649750749	-6.20252858812829	5.55630873357846e-10	5.12506e-09
ACAA2	703.690586183485	-0.994102	0.11068064652333	-8.98171809704141	2.66571091621445e-19	1.47599e-17
ACACB	420.838041553141	-0.654933	0.143531546666078	-4.56299285150469	5.04295323900124e-06	2.15212e-05
ACADL	29.278177929799	-1.1718	0.23536619529217	-4.97864122945609	6.40322111378965e-07	3.29198e-06
ACAN	139.302928582153	-1.67776	0.295456060112804	-5.67855278204217	1.35839118507687e-08	9.6343e-08
ACAP1	25.4173401050641	-1.78741	0.196827100780595	-9.08111015598764	1.07472986466268e-19	6.32824e-18
ACAP3	3173.69090131055	0.776348	0.111677272853146	6.95170659140716	3.6089340862702e-12	5.00627e-11
ACCN2	2402.39480921789	1.04775	0.106251365449561	9.86106011875021	6.13976748724957e-23	7.12286e-21
ACCN3	153.281460503139	0.734202	0.158589129262944	4.62958699074422	3.66395780756712e-06	1.61125e-05
ACCN4	1344.88078230918	1.62992	0.188280958289568	8.65683650199298	4.8503765018237e-18	2.08684e-16
ACCS	104.516956934276	-1.0017	0.167205396900764	-5.99084813061463	2.08749508455497e-09	1.73168e-08
ACE	221.878872193097	-1.26003	0.186627451473316	-6.75159093050803	1.46232691241822e-11	1.82744e-10
ACMSD	0.756655919006708	-2.7008	0.626347741490884	-4.31197557293906	1.61802312893243e-05	6.26197e-05
ACOT11	85.0571389727632	-0.94405	0.170079796889566	-5.55063166423303	2.84639241673146e-08	1.89792e-07
ACOT12	1.62979858289022	-3.08652	0.649950190722194	-4.7488512144378	2.04575371876775e-06	9.48424e-06
ACPP	14.1493547672757	-1.53385	0.22102911364009	-6.93958533908583	3.93252506870862e-12	5.40896e-11
ACSL1	1081.45168894477	-0.672836	0.13351345045021	-5.03945970748786	4.66847898176158e-07	2.46381e-06
ACSM3	1.98159422511259	-1.18826	0.218402734584074	-5.44070092783676	5.30713445636742e-08	3.3869e-07
ACSS3	313.780657698724	-1.62687	0.195321470748483	-8.32921407167196	8.13807946386989e-17	2.77292e-15
ACTL6B	260.946726036237	1.10473	0.218248511710385	5.06177711087172	4.15366455704134e-07	2.2143e-06
ACTN1	2646.6841417788	-1.37178	0.173217156960962	-7.91940965271705	2.38640893389047e-15	5.79939e-14
ACVR2B	633.35522387329	0.726781	0.0904652996915366	8.03381095625767	9.44907509331685e-16	2.50289e-14
ADAM11	241.178268657762	1.07664	0.200997815084488	5.35649038169921	8.48540150483964e-08	5.17785e-07
ADAM12	146.928588323458	-2.36727	0.229728038250825	-10.3046806864243	6.71141883252857e-25	1.12763e-22
ADAM19	264.532422412069	-0.791645	0.179052662834176	-4.42129946530673	9.81090907692662e-06	3.95726e-05
ADAM29	3.51764183061557	2.1676	0.287194694982035	7.54750915876111	4.43661352813738e-14	8.76085e-13
ADAM33	113.452428557093	-1.87915	0.236779648943956	-7.93627609545587	2.08341955666383e-15	5.15957e-14
ADAM6	247.459536118397	-3.19909	0.31809948432086	-10.0568900764173	8.56616341388976e-24	1.20111e-21
ADAMDEC1	15.9974382601009	-2.36125	0.468864356933955	-5.03609638034114	4.75121397815691e-07	2.50612e-06
ADAMTS1	393.927653784295	-0.648282	0.153148077238229	-4.23304120380814	2.30552244778947e-05	8.65626e-05
ADAMTS14	96.4072818103862	-1.79712	0.243312729481873	-7.38606984377376	1.51232374289198e-13	2.66744e-12
ADAMTS19	28.0638429984407	1.75579	0.240143742444539	7.31140312677496	2.6436708624062e-13	4.45719e-12
ADAMTS20	42.2299118208662	2.39062	0.368490060849147	6.48762201583275	8.72017137346033e-11	9.47887e-10
ADAMTS3	67.6990684410187	-1.79703	0.277926094634308	-6.46583918505255	1.00738167725335e-10	1.08355e-09
ADAMTSL1	109.099223695833	-1.32331	0.219282995187422	-6.03471471054579	1.59243768360552e-09	1.35059e-08
ADAMTSL4	102.263197302499	-1.64602	0.165179579725748	-9.96504050937336	2.16785471149684e-23	2.83567e-21
ADAP2	378.673380725562	-0.686383	0.111811273902507	-6.13876624891435	8.31648338813712e-10	7.43183e-09
ADIG	3.44450869006273	-2.46646	0.324535463681118	-7.59995953992107	2.96223349361036e-14	6.09008e-13
ADM	147.822590409899	-1.2879	0.220992211411697	-5.82780998800945	5.61594680886978e-09	4.29571e-08
ADORA1	1406.55971690315	-0.782163	0.157534392670892	-4.96503205810819	6.86897225289076e-07	3.51289e-06
ADORA3	1103.5430810251	-0.639156	0.130905660906311	-4.88257312618068	1.0471038815185e-06	5.16006e-06
ADPRH	165.68167650594	-0.96767	0.105318063508653	-9.18806883011103	3.99956948104502e-20	2.55579e-18
ADRA1D	44.9243415099741	-1.07307	0.216077754482247	-4.96611544868358	6.83073005165723e-07	3.49517e-06
ADSSL1	84.742179933665	-0.745666	0.11970073695667	-6.22941805403641	4.68170960285396e-10	4.40167e-09
AEBP1	5118.74948970595	-2.16637	0.233874304580533	-9.26296082050961	1.98840345495312e-20	1.3694e-18
AEN	420.443879346033	-0.675067	0.135462311166127	-4.98343355498986	6.24657704977947e-07	3.21738e-06
AFAP1L1	224.901567016194	-0.997062	0.168009554856509	-5.93455363271278	2.94646005327047e-09	2.38185e-08
AFF2	251.971417647903	1.28135	0.204339764239948	6.27066436764609	3.59510812977824e-10	3.46717e-09
AFP	2.49500888656854	-4.14836	0.618974273927641	-6.70198362565898	2.05609081789961e-11	2.48902e-10
AGA	365.658488546249	-0.821243	0.0816910908417008	-10.0530260637245	8.90888844207162e-24	1.24024e-21
AGAP4	306.653152560567	0.613289	0.114740116066911	5.34503003223638	9.04020633950374e-08	5.49575e-07
AGBL2	15.3252564146224	-2.10054	0.251712356754725	-8.34501082111495	7.1207364372864e-17	2.44767e-15
AGPAT9	11.6686636155082	-1.01995	0.217981616281384	-4.67907139913704	2.8817708597733e-06	1.29533e-05
AGPHD1	17.09320342534	-0.610834	0.115462309025086	-5.29033227533691	1.22094342845785e-07	7.21753e-07
AGR3	3.75438489571589	-5.32912	0.886582522287362	-6.01085948615498	1.84542307410241e-09	1.54499e-08
AGTR1	5.93586571328931	-2.00074	0.274269095152558	-7.2948207454789	2.99056969458534e-13	5.00741e-12
AGTRAP	619.99786570502	-0.597107	0.0836743937253538	-7.1360786743376	9.60310592497809e-13	1.47374e-11
AHNAK2	318.962705003799	-0.927082	0.213440990035701	-4.34350548909089	1.40226972229486e-05	5.50142e-05
AHR	480.674796712554	-1.15776	0.158188281107267	-7.31888465426698	2.50040397552458e-13	4.23764e-12
AIF1	982.455188937466	-0.71387	0.135285525141915	-5.27676410842108	1.31484962574628e-07	7.73745e-07
AIM1	109.115146232749	-1.83159	0.222569183768066	-8.22930482269133	1.88303040889613e-16	5.77957e-15
AJAP1	110.562537815755	1.22787	0.180193054187962	6.81421037685802	9.47829165890704e-12	1.22827e-10
AK3L1	222.037886241608	-0.850521	0.146293835973206	-5.81378849327379	6.1074573650116e-09	4.64058e-08
AK7	15.6277398171095	-2.61671	0.313420907606829	-8.34886515995854	6.89219665149974e-17	2.3733e-15
AKAP5	140.200257347986	0.94647	0.186395752666133	5.07774645681673	3.81937902995037e-07	2.05125e-06
ALDH1A3	98.4307942383712	-2.30955	0.367352871825999	-6.28701602857693	3.23625974787497e-10	3.13648e-09
ALDH3A1	17.0957285449082	-3.66124	0.268601360315098	-13.6307722803977	2.62784612197366e-42	6.40209e-39
ALDH3B1	267.952980799176	-0.778554	0.105461800941199	-7.38233145051006	1.55541380259671e-13	2.73355e-12
ALDH5A1	2621.18872668847	0.605726	0.0931940061849657	6.49962803925055	8.05188459968993e-11	8.78887e-10
ALDOC	18871.7828756513	0.699099	0.152475197746004	4.58500003522742	4.53986359370115e-06	1.95627e-05
ALK	130.412538653759	-1.01557	0.226760146720775	-4.47860359871682	7.51329052461516e-06	3.10373e-05
ALOX12P2	5.57706027746175	-1.98829	0.305095552948573	-6.51693820038768	7.17569714472698e-11	7.90584e-10
ALOX5	361.700222737097	-0.968625	0.131663642033066	-7.35681710740373	1.88347121903363e-13	3.25722e-12
ALOX5AP	594.86643006327	-1.26274	0.141943194802292	-8.89611929892166	5.78334120872467e-19	2.98194e-17
ALOXE3	5.48014439002048	1.04132	0.221374215789317	4.70388834076086	2.55252882550035e-06	1.16235e-05
ALPK1	178.54170938887	-1.20803	0.124470042602338	-9.70535191654077	2.86087332141657e-22	2.91929e-20
ALPK3	281.953738707917	-1.03615	0.135915143553363	-7.62350365989051	2.46881296946948e-14	5.1243e-13
ALS2CR12	10.416426472185	-1.11053	0.208539745457843	-5.32526948105637	1.00803481103106e-07	6.07877e-07
ALX4	3.33928494635461	-2.43649	0.470110273854093	-5.18281084615525	2.18566672351782e-07	1.2326e-06
AMH	99.8312689404631	1.09697	0.212816975373881	5.15453743271567	2.54257769128694e-07	1.41343e-06
AMICA1	32.164568893746	-1.37657	0.244221564021832	-5.63656480552237	1.73475771546327e-08	1.20023e-07
AMIGO2	170.135868976457	-1.76011	0.197875857678844	-8.89502797822068	5.84045826191413e-19	3.00344e-17
AMOTL2	2465.71370026334	0.606084	0.123861472929536	4.89323899880742	9.9189830115722e-07	4.91036e-06
AMPD3	374.419778403442	-0.598158	0.115601497642048	-5.17431138996128	2.28753051730039e-07	1.28447e-06
AMZ1	163.759877168261	1.07041	0.144192033222771	7.42353215905985	1.14037463076258e-13	2.05415e-12
ANG	64.3744841906895	-1.5215	0.147600464691213	-10.3082564921598	6.46637547332412e-25	1.10552e-22
ANGPT1	217.205728070498	-1.78256	0.215580577589077	-8.26867143856716	1.35460011676268e-16	4.31765e-15
ANGPT2	287.543729534453	-0.972658	0.213020702589312	-4.56602430040255	4.97061172035664e-06	2.12497e-05
ANGPT4	3.79040637335295	1.08352	0.250887833654966	4.31876250784996	1.56906514868684e-05	6.09428e-05
ANGPTL2	3476.74205394715	0.860859	0.123299564259363	6.98185130115871	2.91315383975467e-12	4.11132e-11
ANGPTL4	470.529792064288	-1.06036	0.190649001746481	-5.56185875552473	2.66916290330922e-08	1.79261e-07
ANGPTL6	18.593707564306	-0.924846	0.177849354941376	-5.20016597468397	1.99110643883466e-07	1.13238e-06
ANGPTL7	2.40293194415933	-2.4916	0.404291546925098	-6.16288830253601	7.14298949424524e-10	6.45419e-09
ANKK1	3.20002184159404	-1.95267	0.342599356059667	-5.69956968591015	1.20110220080522e-08	8.6001e-08
ANKRD13B	753.792253902636	0.606153	0.0873543483410103	6.93900955505207	3.94858429056736e-12	5.42721e-11
ANKRD16	193.817958252886	0.661336	0.069855881207724	9.46714428890059	2.87598652129359e-21	2.29725e-19
ANKRD20A3	75.1895781189559	0.988779	0.197913630350974	4.99601300838234	5.85277142724599e-07	3.03298e-06
ANKRD20B	26.941479492558	0.921565	0.178862114492901	5.15237407117092	2.57209330705438e-07	1.4278e-06
ANKRD24	210.609218185264	0.594163	0.141198069734501	4.20800937841951	2.57630176829053e-05	9.58979e-05
ANKRD26	254.118812127378	0.598637	0.0786478166287826	7.61161189191118	2.70698401703328e-14	5.58298e-13
ANKRD36	219.188264916444	0.591497	0.108714158123281	5.4408506231791	5.30267638699132e-08	3.38517e-07
ANKRD36B	30.0029314445816	0.752721	0.134901598385096	5.57978056335208	2.40822205584522e-08	1.62634e-07
ANKRD45	95.0006848232663	-1.81837	0.194108825338789	-9.36777160757625	7.40799852755534e-21	5.46901e-19
ANKRD5	20.3253859955524	-1.99473	0.212901474521352	-9.36926231262576	7.30412253441005e-21	5.43349e-19
ANKRD53	24.9803987301993	-1.87135	0.20634335305712	-9.06912499136796	1.19976595506741e-19	7.00103e-18
ANKRD58	26.7458318048614	-0.751421	0.14606072517179	-5.14457719378949	2.68123986571473e-07	1.48585e-06
ANO6	1767.60568959971	-0.657512	0.104095046426064	-6.31645819128877	2.67625806595401e-10	2.6437e-09
ANO9	2.18925170734362	-2.01189	0.418764584855597	-4.804352844575	1.55252834418151e-06	7.3946e-06
ANTXR2	377.809338428304	-1.02244	0.117397837669338	-8.70922184264074	3.05967944836731e-18	1.37404e-16
ANXA1	2785.08015790617	-2.96202	0.210997307215053	-14.0382001181027	9.09943992426298e-45	2.53354e-41
ANXA2	2042.97850276768	-1.74185	0.165126092562127	-10.5485774905964	5.15719618903375e-26	1.09254e-23
ANXA2P1	12.0915547309014	-1.64297	0.187746251001137	-8.75102760497005	2.11418644859062e-18	9.83425e-17
ANXA2P2	712.857777787946	-1.91525	0.183290645518985	-10.4492242636978	1.47728584376889e-25	2.83521e-23
ANXA2P3	1.34700484355201	-2.5297	0.370468748497183	-6.82838608084853	8.58752215490201e-12	1.12405e-10
ANXA4	448.335792337727	-0.832311	0.0889447182598308	-9.35762181702046	8.15515584345413e-21	5.93075e-19
ANXA5	6749.05260314707	-0.916514	0.105908698411461	-8.65381579675195	4.98055718741824e-18	2.13813e-16
AOC2	24.9929613767007	0.678208	0.141434068758794	4.79522274464468	1.62494171419343e-06	7.71689e-06
AOX1	33.1929846730228	-2.14927	0.262387288929911	-8.19120025993418	2.58633835180404e-16	7.61446e-15
AP1S3	25.9875637191524	-1.02364	0.148629215792333	-6.88721030528714	5.68970797036399e-12	7.66361e-11
AP3B2	741.318047663368	0.775922	0.11089318708477	6.99701829275703	2.61467159629737e-12	3.7197e-11
APBB1IP	873.993912881322	-0.727655	0.127263706344022	-5.7176967229044	1.07977635325721e-08	7.79727e-08
APCDD1L	14.494146791706	-3.74903	0.632952724430899	-5.92308524593375	3.15956951333677e-09	2.53938e-08
APLN	1563.31576473628	-1.10081	0.161373845885294	-6.82151135794863	9.00876451508379e-12	1.17054e-10
APLNR	5139.53112207793	-1.22433	0.23240971071575	-5.26799784679266	1.37919724675666e-07	8.08681e-07
APOB	9.22810399865028	-2.42115	0.29292085729006	-8.26554736403913	1.39055218751466e-16	4.42118e-15
APOB48R	210.985813403924	-1.06619	0.133732100736334	-7.97259812232916	1.55372785163955e-15	3.91242e-14
APOBEC3B	28.2183930451373	-1.04367	0.186849906565292	-5.58560636881451	2.32886192197298e-08	1.57712e-07
APOBEC3C	135.416871742959	-1.43813	0.144105949695551	-9.97965954712151	1.87107671377232e-23	2.46401e-21
APOBEC3D	16.6261918202157	-1.27798	0.17919985357968	-7.13158010138571	9.9223181878252e-13	1.52033e-11
APOBEC3F	54.1475362125619	-1.30181	0.145161757859825	-8.96800412907313	3.01935732658406e-19	1.64378e-17
APOBEC3G	133.745883352992	-1.40534	0.1344384672577	-10.4534179591437	1.41337806371307e-25	2.75467e-23
APOBEC3H	3.38102302621267	-1.69379	0.243996125685758	-6.94188021856636	3.86915227236762e-12	5.33308e-11
APOC1	2701.2557145226	-0.670317	0.15234492522262	-4.39999765155949	1.0825204967833e-05	4.33498e-05
APOC2	908.639529451756	-1.2339	0.16279536479701	-7.57945930939567	3.46998007327679e-14	7.05213e-13
APOL1	356.848474741673	-1.45027	0.160721828317795	-9.02349013299304	1.82190324469975e-19	1.04132e-17
APOL2	1520.97997451917	-0.700662	0.127958374642379	-5.47569893837508	4.35788060788231e-08	2.81989e-07
APOL3	305.200928956361	-0.636532	0.113672684295067	-5.59968758377759	2.14738453476135e-08	1.46133e-07
APOL4	379.304482855387	-1.69958	0.234429281144879	-7.24985478389448	4.17218708014988e-13	6.84477e-12
APOL6	825.22116478273	-0.995811	0.125448973278607	-7.93797743785803	2.05504708258949e-15	5.10228e-14
AQP1	19485.2259556738	-1.61806	0.235331927207095	-6.8756672695383	6.17003610866265e-12	8.22531e-11
AQP4	30249.0448733707	-0.852534	0.174694098403602	-4.88015128573701	1.06004492668837e-06	5.21988e-06
ARAP3	405.095127722615	-1.03351	0.168201836517873	-6.14444221583538	8.02449952864045e-10	7.19069e-09
ARG1	1.76607398153468	-1.58091	0.374531842746063	-4.22102088946311	2.43198395931936e-05	9.09253e-05
ARHGAP11A	190.285936238297	-0.910983	0.178305673668174	-5.109107542219	3.23684086292969e-07	1.75874e-06
ARHGAP11B	13.3881051569563	-0.975148	0.223177682005945	-4.36937954985916	1.24600042444312e-05	4.93187e-05
ARHGAP15	68.8944436186332	-1.10707	0.141555526062815	-7.82077740437467	5.249810542889e-15	1.20375e-13
ARHGAP18	260.226708994172	-1.43927	0.127479106220416	-11.2902434737736	1.46629932696506e-29	6.38539e-27
ARHGAP25	300.133250112168	-0.824131	0.106269423329577	-7.75510511366742	8.82703320398804e-15	1.96616e-13
ARHGAP30	487.196629638214	-0.739367	0.123527269274557	-5.98545179931605	2.15790021321697e-09	1.78361e-08
ARHGAP32	1967.26882324965	0.770582	0.0805555605020797	9.56584719147826	1.11286246075492e-21	9.81434e-20
ARHGAP9	187.913149187457	-0.675879	0.120734937477109	-5.59803931862689	2.16789592113769e-08	1.47375e-07
ARHGDIB	1858.72022010856	-0.741438	0.102493359145044	-7.23400785143094	4.68944645260705e-13	7.62916e-12
ARHGDIG	352.58977161104	0.946097	0.207039081215496	4.56965481883533	4.88528168977515e-06	2.0917e-05
ARL11	55.4057889923961	-0.922481	0.124727675648907	-7.39596028230816	1.40389967668893e-13	2.4852e-12
ARL4C	1223.08447696791	-0.957068	0.181416443167996	-5.27553022380542	1.32372791563481e-07	7.7756e-07
ARL9	5.85416267148794	-2.36976	0.356039338372098	-6.65589533489485	2.81580590548017e-11	3.32405e-10
ARMC2	46.8912422065848	-0.971668	0.123140496536683	-7.89072467520667	3.00436807722292e-15	7.18468e-14
ARMC3	56.6622684808621	-2.95623	0.361417373285035	-8.17953478295117	2.84941814950571e-16	8.33861e-15
ARMC4	29.5888442086589	-1.53315	0.245461297569012	-6.24597868563961	4.21154608674526e-10	4.006e-09
ARNTL2	46.1444309221486	-1.1709	0.194170150259796	-6.03029259398903	1.63663091333497e-09	1.38506e-08
ARPC1B	1396.06022501625	-0.686545	0.108789760533231	-6.31074632537505	2.77693043938729e-10	2.73197e-09
ARPP21	691.846260567712	1.23364	0.14336819135582	8.60470030408704	7.65164203263161e-18	3.16625e-16
ARRDC4	1247.49358336157	-1.01534	0.129193021647273	-7.85910411463056	3.86890561458342e-15	9.074e-14
ARSD	393.487743161655	-1.40125	0.147809137593672	-9.48010986846204	2.54015477988327e-21	2.05426e-19
ARSE	56.6282964811204	-1.13603	0.165057297827598	-6.88261148239252	5.87651422779943e-12	7.88254e-11
ARSF	54.8216235673061	-1.95709	0.321725002978343	-6.08311720739489	1.1786811639375e-09	1.02809e-08
ARSI	74.4215476037121	-0.913339	0.205973862080603	-4.43424710537696	9.23946046377999e-06	3.7407e-05
ARSJ	116.27456365481	-1.32164	0.229528831556955	-5.75806455074169	8.50838212748272e-09	6.2755e-08
ASB13	842.473138547738	0.675996	0.0820337558773283	8.24046162570039	1.71547481157063e-16	5.29029e-15
ASB5	23.3269210850969	-1.51711	0.336019229764595	-4.5149535681751	6.33306399579673e-06	2.65444e-05
ASB9	9.51575094747626	-0.918223	0.159337007569144	-5.76277060616319	8.27442242015232e-09	6.12722e-08
ASCL2	13.5345458213945	-1.28248	0.157178605182068	-8.15938693528633	3.36729314687898e-16	9.66547e-15
ASF1B	139.34820041669	-1.24654	0.20700798093972	-6.02169859052973	1.72596082603826e-09	1.45121e-08
ASGR2	9.7048623644909	-0.907285	0.197112222901898	-4.60288793196479	4.16672463757604e-06	1.80948e-05
ASPM	181.821730057884	-1.20938	0.268006996336607	-4.51250434958819	6.40666204500929e-06	2.68356e-05
ASPN	28.5295149390301	-1.59212	0.222668511814688	-7.15016931151383	8.66709325426144e-13	1.34385e-11
ASXL3	168.669637989382	0.66974	0.141001949224064	4.74986499058086	2.03552498240048e-06	9.45481e-06
ATCAY	2844.58445648933	1.06544	0.150977013705375	7.05699671174313	1.70139648287019e-12	2.48951e-11
ATF3	456.933760211646	-0.948727	0.181536463998392	-5.22609831669969	1.73124328086687e-07	9.96219e-07
ATG9B	32.2269534785393	-1.27223	0.208763339670474	-6.09411253017755	1.10046231514307e-09	9.64389e-09
ATOH7	11.0170128768816	0.957919	0.209044877386547	4.58236032244754	4.59756797712183e-06	1.97763e-05
ATOH8	1116.20606971188	0.938272	0.149475729934409	6.27708573046414	3.44977888951635e-10	3.33445e-09
ATP1A3	5412.34797940938	1.03954	0.164378500051754	6.32408345848719	2.54740024370304e-10	2.52923e-09
ATP1A4	7.66440117513904	1.31026	0.280145737871678	4.67707939569148	2.90989614031203e-06	1.30647e-05
ATP2A3	87.7472656112095	-0.935833	0.163264726525378	-5.73199848011459	9.92541621781092e-09	7.23976e-08
ATP2B3	181.238102938696	1.19463	0.26533755881161	4.50231826653664	6.72162239100577e-06	2.80463e-05
ATP6V1G2	2039.31253577154	0.788651	0.135219768661566	5.83236684359148	5.46466106690933e-09	4.18986e-08
ATP7B	144.757326355641	0.617669	0.0859654456945122	7.18507944146681	6.71681202272299e-13	1.06605e-11
ATP8A1	1682.56460069466	0.70468	0.126285517576348	5.58005312447901	2.40445135410907e-08	1.62485e-07
ATP8B1	39.5536058836392	-0.903965	0.156673961557061	-5.76972157889608	7.94026105059812e-09	5.89321e-08
AURKA	105.576937308676	-1.05388	0.160240666725514	-6.57688535674001	4.80404884848808e-11	5.44682e-10
AURKC	21.5273306922776	-0.89205	0.181029164923793	-4.92765965004377	8.32204175215696e-07	4.18464e-06
AVIL	93.0463970237269	-1.11573	0.201803515185198	-5.52877073746926	3.22482451322741e-08	2.12841e-07
B2M	26553.6380364789	-0.843082	0.101366511812967	-8.31716160856586	9.00948683171805e-17	3.04852e-15
B3GALT4	129.877407981991	-0.703888	0.109790304376731	-6.41120209174996	1.44376658404943e-10	1.51123e-09
B3GNT5	313.259464608629	-1.26585	0.149039920110839	-8.49335744243817	2.00751672776413e-17	7.57392e-16
B3GNT7	152.669646708119	-1.62272	0.227965272870561	-7.11828759699644	1.09276172175286e-12	1.6626e-11
B3GNT8	7.0983896040495	-1.16588	0.1816376720579	-6.41869561755502	1.37446910446107e-10	1.4449e-09
B3GNT9	492.007294903885	-0.636469	0.131678323621258	-4.83351326051151	1.34144339095208e-06	6.47307e-06
BACE2	196.144752342071	-1.07351	0.134063384895573	-8.00749235753647	1.17071017997829e-15	3.03823e-14
BAI1	2745.93947524283	1.03723	0.176031697087197	5.89231013747752	3.80833549874374e-09	3.03081e-08
BAI3	935.098414195232	0.661248	0.0967758818129306	6.83277286749373	8.32887743477609e-12	1.09239e-10
BANK1	21.0286224244208	-2.14627	0.281729887420217	-7.6181896819797	2.5725807792509e-14	5.334e-13
BATF	18.2333327492977	-1.69609	0.219524963485015	-7.72616477515708	1.10835145135809e-14	2.43263e-13
BATF2	122.616546352365	-1.11588	0.157408325819941	-7.08908009309177	1.35006379545356e-12	2.01785e-11
BATF3	81.1120437378228	-0.835053	0.16057116918844	-5.20051470160238	1.98737397529437e-07	1.13059e-06
BCAN	70896.2274966923	0.877607	0.126612904415255	6.93141759692666	4.16644125941587e-12	5.70653e-11
BCAS4	550.0548780154	-0.660723	0.104156908353699	-6.34353867003482	2.24546574885099e-10	2.25588e-09
BCAT1	874.767871604181	-1.50125	0.217330739517133	-6.90766003691713	4.92712985468927e-12	6.69197e-11
BCL2A1	59.9962106691709	-1.11967	0.23734883313039	-4.71740431009586	2.38872688945076e-06	1.09338e-05
BCL2L12	76.3464431492141	-0.88982	0.103958691117835	-8.55936348485088	1.13492366494303e-17	4.52345e-16
BCL2L14	2.49248801230192	-1.17137	0.237142443864286	-4.93954136180599	7.8306532783426e-07	3.96105e-06
BCL3	146.993115703549	-0.63606	0.114946914058875	-5.53350731356025	3.13889888566631e-08	2.07521e-07
BCL7A	1083.92531441418	0.907892	0.104675308212393	8.67340860126443	4.193737752906e-18	1.8409e-16
BCMO1	52.149747536047	-0.940956	0.166189726976545	-5.66193974195186	1.4967138620794e-08	1.05045e-07
BCO2	64.2546466998086	-0.933254	0.159463477218149	-5.85246312333973	4.84345661252775e-09	3.76055e-08
BCR	4494.29257199547	0.79704	0.0958664408605552	8.3140712286552	9.24736012916073e-17	3.11818e-15
BDKRB1	1.18377992370202	-1.82113	0.343003967410533	-5.30935611448147	1.10013194124623e-07	6.57591e-07
BDKRB2	43.2829561007508	-1.53775	0.224873252930558	-6.83830325479476	8.01366223171428e-12	1.05176e-10
BEND4	26.4053407920004	1.20893	0.229293845774126	5.27239468289116	1.34655110286379e-07	7.90252e-07
BEST4	14.3779391938481	-1.6561	0.215850136988315	-7.67244722423886	1.68745397873673e-14	3.60619e-13
BEX1	2640.28807022478	0.750361	0.104923972565449	7.15147620406621	8.5849604427721e-13	1.33217e-11
BGN	2395.43525236817	-1.3251	0.157921928611373	-8.39087270626955	4.82546593277282e-17	1.69762e-15
BHLHE40	1362.29752241365	-0.760534	0.145784291168423	-5.2168477842854	1.81993696125159e-07	1.04233e-06
BHLHE41	2428.38474165758	-0.668865	0.116917651877984	-5.72081812383625	1.06012332483477e-08	7.68097e-08
BICC1	25.1036098814354	-1.02275	0.20620607079914	-4.95984125919998	7.05508071704551e-07	3.59863e-06
BICD1	241.746157635237	-0.769752	0.129380250962474	-5.94953542414581	2.68904641293802e-09	2.18829e-08
BIRC3	59.2864134169519	-1.17371	0.187329591248359	-6.26550132346762	3.71627845326089e-10	3.57151e-09
BLNK	178.428261354754	-0.740621	0.139180189121449	-5.32131263823976	1.03021178890143e-07	6.201e-07
BMP2	936.836945734137	1.29054	0.174330949673102	7.40283187302174	1.33310491054184e-13	2.36632e-12
BMS1P5	57.6015455715871	0.721897	0.103995047000374	6.94164509296016	3.8755989188755e-12	5.33819e-11
BNC2	79.3810703647306	-0.766414	0.163468516658439	-4.68845076858219	2.7528112125477e-06	1.24224e-05
BRCA1	272.361179142048	-0.793587	0.0985062741840866	-8.05620409261494	7.87001888057484e-16	2.10407e-14
BRCA2	58.8097876781492	-1.02742	0.202063656546077	-5.08463193435765	3.68339655822414e-07	1.98533e-06
BRIP1	41.5538604116217	-1.29449	0.252618334005636	-5.12428226460455	2.98673267938508e-07	1.63699e-06
BRSK2	684.401018349899	0.943838	0.118992060882895	7.93193871054939	2.15750914927271e-15	5.32277e-14
BSN	1157.8304608449	1.023	0.158305950993179	6.46214970057992	1.03225901775556e-10	1.10809e-09
BST1	43.5207609556029	-0.885445	0.153237070869343	-5.77827041914563	7.54724372750824e-09	5.61863e-08
BST2	1153.80182423402	-1.05584	0.151133367800433	-6.98614442526397	2.82543224759461e-12	4.00492e-11
BTBD17	487.674167818923	1.09478	0.164490711545386	6.65558672674001	2.82172105983949e-11	3.32902e-10
BTK	240.272738504151	-0.76528	0.120422643544674	-6.35495460584312	2.08488179795089e-10	2.10759e-09
BTLA	4.03217789943804	-1.15367	0.21291793621551	-5.4183668883011	6.01458940104793e-08	3.79859e-07
BTN2A2	291.586505611035	-0.878553	0.105012705256566	-8.36615782352467	5.95274526232341e-17	2.06807e-15
BTN2A3	15.2049717451889	-0.642031	0.133502048069397	-4.80915035288572	1.51573170114799e-06	7.24414e-06
BTN3A1	693.157441666661	-0.69902	0.103488586657339	-6.75456532593308	1.43264108295779e-11	1.79333e-10
BTN3A2	1137.46376954698	-0.902982	0.131140976541734	-6.88558218375708	5.75516770315341e-12	7.73574e-11
BTN3A3	589.36343302103	-0.971192	0.121460599438935	-7.99594242054525	1.28586468406669e-15	3.30191e-14
BUB1	155.990128870823	-1.12141	0.233139615230486	-4.81004539189751	1.5089602451908e-06	7.21709e-06
BZRAP1	1563.670142854	1.04525	0.122483210649946	8.53384935143367	1.41557144675625e-17	5.5512e-16
C10orf10	1097.46326791048	-1.33757	0.171355406946634	-7.80581439313805	5.91185319553985e-15	1.34448e-13
C10orf105	275.659611757689	-1.60397	0.272469041866901	-5.88679876640848	3.93747648482928e-09	3.12287e-08
C10orf107	82.7950349143401	-0.861681	0.192238566088467	-4.48235154579953	7.38249974067882e-06	3.05488e-05
C10orf11	36.6399172894738	-0.928813	0.153632187319736	-6.04568950803026	1.48772363352403e-09	1.27063e-08
C10orf114	55.205382134481	-0.81262	0.161730391499601	-5.02453740238786	5.04647448178082e-07	2.64611e-06
C10orf41	40.5919837777904	-0.637044	0.0966815880483438	-6.58909378308936	4.42519211246361e-11	5.05255e-10
C10orf67	2.32712318069121	-1.456	0.324430062506881	-4.48786335269674	7.19410461542284e-06	2.9858e-05
C10orf79	80.4341020665303	-2.03575	0.217037884279422	-9.37970692556367	6.61563591940989e-21	4.99763e-19
C10orf81	30.5079311072829	-3.05709	0.422531462834006	-7.23517225961482	4.64938622218456e-13	7.5703e-12
C10orf93	16.672716200634	-0.659278	0.135793572586321	-4.85500012223737	1.20386669239012e-06	5.86437e-06
C11orf20	20.8835261430789	1.22628	0.199980392154814	6.13198504494014	8.67892641112534e-10	7.72738e-09
C11orf21	6.83561767889319	-1.78707	0.21549088353666	-8.29300980274904	1.10418237216854e-16	3.63468e-15
C11orf35	6.23978092868116	-1.09589	0.197805838814969	-5.54021757762749	3.02096072026634e-08	2.00131e-07
C11orf42	1.49256345416439	1.07406	0.235502271401794	4.56073099652644	5.09758506380594e-06	2.17258e-05
C11orf45	44.9546376002903	-0.656129	0.125139287033695	-5.24318972816526	1.57824102245227e-07	9.14113e-07
C11orf63	48.5709588108899	-2.61562	0.254408890936451	-10.2811590190657	8.56908543519064e-25	1.40346e-22
C11orf70	55.3500637218125	-1.43322	0.223008370135722	-6.42676395495345	1.3034898787697e-10	1.37324e-09
C11orf82	72.1369778265952	-0.836048	0.16894076720979	-4.9487668810486	7.46851326146888e-07	3.78831e-06
C11orf86	1.37467830796367	-2.39031	0.46518556506564	-5.13840532394996	2.77079731674173e-07	1.52939e-06
C11orf88	5.66859311547654	-4.8985	0.558959017603907	-8.76361236932957	1.89091239054373e-18	8.9019e-17
C12orf34	1117.00110971232	0.710678	0.128052864567033	5.54987858174896	2.8586806678699e-08	1.90416e-07
C12orf48	40.193991826209	-0.885137	0.146365153936931	-6.04745891035222	1.47148178574207e-09	1.25786e-08
C12orf5	423.433898515361	-0.737867	0.0820642173216812	-8.99133850121949	2.44237571008572e-19	1.36005e-17
C12orf51	2131.19098164964	0.647455	0.0661723103591594	9.784386393025	1.31389807952845e-22	1.43061e-20
C12orf53	1793.58059437132	0.651386	0.115156521874132	5.65652377047869	1.54469593907035e-08	1.08023e-07
C12orf59	64.7720268267913	-0.662332	0.138708141588757	-4.77500746380906	1.79700589291715e-06	8.44961e-06
C12orf63	18.9003686371887	-2.36069	0.284586698968575	-8.29516785170385	1.0843198806459e-16	3.58193e-15
C13orf18	218.864771344628	-0.99188	0.169738327566159	-5.84358016494896	5.10906943994311e-09	3.94047e-08
C13orf26	23.2191922853249	-2.56132	0.331963774873694	-7.71564954636135	1.20367633078609e-14	2.63296e-13
C13orf29	30.4337198225033	-1.31104	0.176481920377865	-7.42875822526885	1.0962190597193e-13	1.98562e-12
C13orf30	4.10819029790179	-3.84336	0.622348243679522	-6.17557497932702	6.59231110846472e-10	5.99553e-09
C13orf31	155.205172415999	-0.815653	0.158330331187601	-5.15158805710057	2.58289896550718e-07	1.43339e-06
C13orf33	13.1145872120751	-2.23899	0.299389266673819	-7.47853629277026	7.51549474124943e-14	1.42349e-12
C13orf38	15.3752651369673	-0.977364	0.148212823957344	-6.5943253265048	4.2719403623513e-11	4.8919e-10
C14orf106	228.549531834814	-0.618383	0.110448436681807	-5.59884014932881	2.15790655878598e-08	1.46747e-07
C14orf169	99.6510380048885	-0.654071	0.103852736904263	-6.29805901034612	3.01395780615564e-10	2.94299e-09
C14orf174	31.027301812837	-0.962376	0.145838114669169	-6.59893674314108	4.14116946170144e-11	4.76173e-10
C14orf50	13.5923002456461	-2.20973	0.245497301399864	-9.00103413505689	2.23601410294719e-19	1.25591e-17
C14orf86	19.797854778739	-1.25066	0.230085893994237	-5.43560313274305	5.46113862794905e-08	3.47268e-07
C15orf26	10.4383903155155	-4.87132	0.448054600814444	-10.8721542767985	1.56462142273991e-27	4.55141e-25
C15orf28	4.97364501772762	0.81705	0.154091450236171	5.30237123136477	1.14308092965492e-07	6.80888e-07
C15orf50	0.490906743761376	1.91256	0.392993862582947	4.86662849994095	1.13518125048351e-06	5.56316e-06
C15orf56	3.66262154569523	-1.43138	0.191290115877005	-7.48276500323366	7.27749467985623e-14	1.38109e-12
C16orf54	26.4300319982151	-1.15981	0.138472809077993	-8.37568938266428	5.4901539331138e-17	1.91419e-15
C16orf71	35.9333661916952	-1.31997	0.148749071398731	-8.87377876200849	7.07049527839339e-19	3.55165e-17
C16orf75	76.0791363479902	-0.862198	0.182375888708006	-4.72758734667799	2.27203336237938e-06	1.04242e-05
C16orf89	250.15058779848	-1.18455	0.191351398109007	-6.19042276800953	6.0003061936368e-10	5.49558e-09
C17orf60	37.0907017326168	-0.93446	0.146248992825342	-6.38951542289161	1.66412253926166e-10	1.72062e-09
C17orf69	142.649992661382	0.658696	0.0805693039720311	8.1755204083812	2.94591565311079e-16	8.60137e-15
C17orf72	103.753671385863	-2.71779	0.241217580550895	-11.2669536848277	1.91066555261107e-29	7.92316e-27
C17orf76	138.949537599597	-0.626245	0.143447075251006	-4.36569015542533	1.2672200471669e-05	5.00874e-05
C17orf87	27.3638074029553	-1.08791	0.171959112543994	-6.32657439708882	2.50663473992656e-10	2.49511e-09
C17orf96	310.903724169642	0.924421	0.124857911059655	7.40378191653112	1.32359729707988e-13	2.35159e-12
C19orf35	34.0591673411535	-0.888429	0.159688442405906	-5.56351673559043	2.64391494288441e-08	1.77689e-07
C19orf38	63.1208219281118	-0.602053	0.132097722705434	-4.55763093716491	5.17338389282775e-06	2.20055e-05
C19orf40	21.5822735453216	-0.745015	0.112457791222283	-6.6248439493495	3.47615209468361e-11	4.03275e-10
C19orf51	47.9904414369849	-2.00886	0.216484533755708	-9.27947532248011	1.70315163931178e-20	1.18552e-18
C19orf66	536.082996041187	-0.877849	0.120966574029062	-7.25695401568244	3.95904220009935e-13	6.51154e-12
C1orf101	11.687990927591	-0.683907	0.14503782082475	-4.71536803672199	2.41274228166448e-06	1.10334e-05
C1orf110	6.2527446203952	-2.64507	0.329439814097015	-8.02900489785266	9.82664355065219e-16	2.59866e-14
C1orf127	2.28519232624459	-1.35916	0.277316214012482	-4.90112666578764	9.52885909393854e-07	4.73166e-06
C1orf133	18.9927259663647	-0.939424	0.207510437172566	-4.52711734028018	5.97937418413296e-06	2.51648e-05
C1orf158	32.1289946817488	-5.44041	0.50889976778142	-10.6905295809328	1.12725467953448e-26	2.81669e-24
C1orf162	287.399455831787	-0.837701	0.143274265951753	-5.84683327004662	5.01019227925301e-09	3.8747e-08
C1orf182	1.38973934766183	-1.2099	0.240656168157897	-5.02749189845368	4.96936474276276e-07	2.60918e-06
C1orf183	374.519357120202	0.618655	0.127862779338287	4.83842885768778	1.30869522533894e-06	6.33386e-06
C1orf192	239.49748436285	-2.18239	0.221757627153929	-9.84133037933738	7.47162019195875e-23	8.5159e-21
C1orf194	129.218494627631	-1.68814	0.220586247935108	-7.65299199826428	1.96356135403483e-14	4.13728e-13
C1orf201	116.262523385352	-0.87821	0.179865196905455	-4.8826015496112	1.04695290814703e-06	5.16006e-06
C1orf220	11.674715735286	0.97052	0.141795485227078	6.84450602375036	7.67402086041842e-12	1.0099e-10
C1orf38	514.340435905655	-0.629881	0.145833859588171	-4.31917049325204	1.56616757266224e-05	6.08423e-05
C1orf54	201.030278259313	-0.777568	0.117242172054052	-6.63215448417755	3.30822065764003e-11	3.85169e-10
C1orf61	18698.6095606027	0.6904	0.115032339610206	6.00179263943443	1.95150829950913e-09	1.6247e-08
C1orf70	123.98204612952	0.591043	0.111357858909399	5.30760245263031	1.11076574241538e-07	6.62651e-07
C1orf85	481.838785869017	-0.761645	0.095235567375909	-7.99748879843179	1.26982322771238e-15	3.26933e-14
C1orf87	16.5372092843498	-2.7179	0.364835314748935	-7.44966283682352	9.35790739441912e-14	1.72062e-12
C1orf88	476.712941995898	-2.0371	0.172821376538787	-11.7873274091832	4.53711216711017e-32	2.52652e-29
C1orf92	1.7766407483603	-3.43523	0.729527656704937	-4.70883728879935	2.49133842313987e-06	1.13688e-05
C1orf95	426.545175660356	0.841138	0.176248648103512	4.77244844466265	1.81999705532775e-06	8.54741e-06
C1orf97	54.1016203062153	-0.676156	0.0925491213611692	-7.30592001324205	2.7537595891062e-13	4.63478e-12
C1QA	3796.94406218242	-1.00931	0.152069968256972	-6.63711294732905	3.19886534690395e-11	3.73776e-10
C1QB	5778.07369037008	-1.06888	0.150623782902163	-7.09638599837857	1.28061488679182e-12	1.92142e-11
C1QC	5055.05395035247	-0.893152	0.141624470344204	-6.30647995881018	2.85452921567251e-10	2.79853e-09
C1QL4	213.892114337206	1.12218	0.261512623467805	4.29109320904612	1.77795661624141e-05	6.82133e-05
C1QTNF1	1109.43991045872	-1.35095	0.189666671709884	-7.12277472986789	1.0577562853986e-12	1.61186e-11
C1QTNF2	26.9830395939086	-1.1374	0.154350978078262	-7.36891009160576	1.72028624875309e-13	2.99628e-12
C1QTNF4	90.531388035344	0.9923	0.20629034888325	4.81021058351943	1.50771366436079e-06	7.2129e-06
C1R	2898.42878515915	-2.26792	0.181381390390124	-12.5036139958558	7.13331231680664e-36	8.68927e-33
C1RL	372.965379757834	-1.9967	0.155944276316113	-12.8039444915991	1.55830253129666e-37	2.33626e-34
C1S	2347.95916431164	-2.25241	0.183422259024759	-12.2799032641746	1.16137042185152e-34	1.02887e-31
C2	464.113724909441	-1.27777	0.173713450057504	-7.35559342933007	1.90080749759895e-13	3.28429e-12
C20orf134	6.13153686105619	-0.989567	0.176167330326188	-5.61720204005597	1.94074443736335e-08	1.33e-07
C20orf195	2.52670061185774	-2.53275	0.345453551114078	-7.33165332728028	2.27330534558984e-13	3.86621e-12
C20orf197	9.35426143974475	-0.647946	0.149266928136459	-4.34085503634034	1.41929339855195e-05	5.56132e-05
C20orf203	25.9441296055882	1.35561	0.192982802451406	7.02450045139454	2.14833482452208e-12	3.09697e-11
C20orf26	57.8700031777366	-2.40532	0.206822271062652	-11.629904705116	2.90421605649482e-31	1.41508e-28
C20orf30	1872.54052547716	-0.695271	0.0371746408540728	-18.7028324712581	4.69435646653584e-78	9.1493e-74
C21orf121	5.61720713919577	-1.78677	0.298928144524705	-5.9772706293752	2.26907077832363e-09	1.866e-08
C21orf125	9.40069106135387	2.0719	0.186650312753352	11.1004627965679	1.24795994397108e-28	4.42232e-26
C21orf62	518.048688524059	-2.05806	0.200421711730253	-10.2686652825386	9.75448312318559e-25	1.55832e-22
C21orf63	289.978053055528	-1.20901	0.143129420883522	-8.44697454886765	2.98948867956688e-17	1.09727e-15
C21orf7	123.532824608758	-1.82182	0.206208248510078	-8.83483759261505	1.00243787316371e-18	4.88438e-17
C21orf88	42.813179038991	-1.03537	0.147398759464751	-7.02430261905942	2.15138069270693e-12	3.09907e-11
C22orf15	1.79734171275678	-2.37094	0.384705154063126	-6.16301665937433	7.13719952565327e-10	6.45195e-09
C22orf45	6.08099576882044	0.872182	0.152290136194828	5.72711086541004	1.02155413105575e-08	7.42637e-08
C2CD4C	191.7806344038	0.766874	0.154173050094136	4.97411397628802	6.55467375256125e-07	3.36363e-06
C2orf27A	139.862878100574	1.09554	0.159710299220794	6.8595367089122	6.90842253336193e-12	9.15953e-11
C2orf39	72.4465865429752	-4.66492	0.442604928241202	-10.5397011044832	5.66787481926561e-26	1.17518e-23
C2orf40	104.938475885578	-1.82377	0.235027318652246	-7.75981365470799	8.50542637809399e-15	1.89886e-13
C2orf50	17.6563176304452	-2.42802	0.317255234289296	-7.65320798393837	1.9602647688932e-14	4.1348e-13
C2orf62	14.219555857995	-3.5652	0.358679107117736	-9.93981089743877	2.793569443092e-23	3.5355e-21
C2orf66	5.06781330334934	-1.41579	0.260613189371019	-5.43253344498702	5.55595360255491e-08	3.52837e-07
C2orf70	3.50754497529248	-3.07859	0.528982408367416	-5.81983971823585	5.89040858185643e-09	4.48804e-08
C2orf73	6.48520434017122	-1.4288	0.19532612091196	-7.31492345663001	2.57528145264601e-13	4.35696e-12
C2orf77	227.242257465356	-1.27298	0.134231539323779	-9.48342697755708	2.46066219107971e-21	2.00662e-19
C2orf80	181.012289640736	0.882567	0.161317904775367	5.47098019258775	4.4755332178166e-08	2.89026e-07
C2orf81	176.636382807418	-0.60819	0.118595771735517	-5.12826074946089	2.92431227311792e-07	1.60413e-06
C2orf85	356.397072240893	1.72841	0.211653416366304	8.1662155196582	3.18214559350129e-16	9.24292e-15
C3	17069.5929446409	-1.28784	0.14566336800968	-8.84119725747784	9.46982980541187e-19	4.64904e-17
C3AR1	823.092767750376	-0.614515	0.142228346731156	-4.3206254873371	1.55587545648658e-05	6.04787e-05
C3orf15	153.106601622798	-1.06929	0.175732111046462	-6.08479673404905	1.16639191872822e-09	1.01805e-08
C3orf16	6.66355909347218	-1.60453	0.359363291419873	-4.46493648021512	8.00925100417039e-06	3.28425e-05
C3orf52	5.8790568753185	-1.93031	0.269438696053801	-7.16418732569826	7.82493450491436e-13	1.22595e-11
C3orf57	127.543607901509	-1.13947	0.220029891601436	-5.17871633265052	2.23417888759214e-07	1.25741e-06
C3orf59	240.7371388053	0.804575	0.110365424873849	7.29010397880181	3.09715899267975e-13	5.17698e-12
C3orf66	6.30335176480557	-1.49399	0.348450981352515	-4.28753216230462	1.80669104975277e-05	6.9234e-05
C4A	17379.5279179061	-0.824211	0.162393026052189	-5.07540968425027	3.86661984353271e-07	2.07433e-06
C4orf36	5.75446201622352	-0.620016	0.145434119720956	-4.26320990971938	2.0151105533971e-05	7.64542e-05
C4orf44	10.1673732724833	0.856159	0.165726577709964	5.16609579705822	2.39034312454694e-07	1.33566e-06
C4orf47	27.0161045743396	-1.77423	0.201865453811058	-8.78919042226893	1.50641547043908e-18	7.17849e-17
C4orf49	39.6960883549405	-0.895544	0.196094522565265	-4.56690157307889	4.94986287602801e-06	2.11656e-05
C5orf32	749.285670625422	-0.635934	0.102147064046811	-6.22566825450917	4.79507738273192e-10	4.49957e-09
C5orf34	36.338190099392	-0.717743	0.151552969200874	-4.73592040188983	2.18063167966206e-06	1.0045e-05
C5orf39	70.9662628304868	-0.744124	0.130815316859393	-5.68835629141787	1.28267988515889e-08	9.13722e-08
C5orf49	112.62394767727	-2.59658	0.284115145675611	-9.13918355957436	6.29255819821659e-20	3.84458e-18
C5orf62	466.559275264654	-0.995037	0.134937666293976	-7.37404703974035	1.65524741493586e-13	2.89075e-12
C6	8.0906636758752	-2.98664	0.393626337196068	-7.5875031216815	3.26128759912011e-14	6.66274e-13
C6orf103	1.32653283418865	-3.6168	0.853813517556345	-4.23605095290029	2.27485177312997e-05	8.55434e-05
C6orf115	112.322318862713	-0.891122	0.104063063438711	-8.56328624566016	1.09695141790921e-17	4.38106e-16
C6orf118	28.4101386467344	-2.83718	0.240585781804339	-11.792798419788	4.25174538078835e-32	2.43725e-29
C6orf141	16.6524104398082	-2.31129	0.358259786623423	-6.45143199732252	1.10798165624983e-10	1.18048e-09
C6orf15	15.4619342049572	-5.40721	0.859006597387682	-6.29472369140675	3.07947900761249e-10	3.00396e-09
C6orf150	24.8138815427768	-1.22895	0.136403896242399	-9.00965284450379	2.06709786158083e-19	1.16776e-17
C6orf165	30.0853312926617	-2.0867	0.195483954178642	-10.6745585886571	1.33892352436752e-26	3.30324e-24
C6orf186	4.30239398145968	-1.56077	0.368173913998828	-4.23920678703546	2.24310964455871e-05	8.4447e-05
C6orf195	2.0074269716259	-1.33382	0.249605897380419	-5.34370166037726	9.10674095157012e-08	5.53274e-07
C6orf217	19.1533677562949	-0.646139	0.132576668038026	-4.87370195292204	1.09526192078255e-06	5.38227e-06
C6orf97	86.890789266031	-1.32842	0.210131256053406	-6.32185938440962	2.58434502856722e-10	2.562e-09
C7	151.632211437291	-1.5626	0.230706913274054	-6.77311646072013	1.26037411666553e-11	1.59304e-10
C7orf29	30.7682862553717	-1.43814	0.177365668385222	-8.10833133941516	5.13196357139314e-16	1.40678e-14
C7orf31	97.3784581407377	-0.848597	0.0944857022188182	-8.98121804213017	2.67785575802972e-19	1.47851e-17
C7orf46	161.685939275414	-0.644558	0.147954521256613	-4.35645909777093	1.32183380190212e-05	5.20982e-05
C7orf54	7.34723219988262	0.970155	0.136257848823476	7.11999419443304	1.079316095992e-12	1.64343e-11
C7orf57	67.0583065349831	-4.71759	0.334383259356638	-14.1083214369768	3.37516342804845e-45	1.09637e-41
C7orf68	280.741596088635	-0.67375	0.107962124579156	-6.24061133755779	4.35864022979903e-10	4.1298e-09
C8orf12	21.9890629365697	-1.30404	0.262251607908449	-4.97246431303229	6.61071431237429e-07	3.38882e-06
C8orf34	91.6843238065901	-1.71393	0.260895971936326	-6.56940865657277	5.05154715269945e-11	5.69431e-10
C8orf42	506.008892520665	0.610316	0.0875055868252407	6.97460002031502	3.06742250955058e-12	4.29792e-11
C8orf48	24.0681540802247	-1.01897	0.127200355024949	-8.01072307419111	1.1403596709591e-15	2.96457e-14
C8orf84	98.7312687413088	-1.49246	0.224419570813397	-6.65030274953283	2.92490747692079e-11	3.44034e-10
C8ORFK29	23.7546363572494	0.827288	0.182709663267988	4.52788242461357	5.95777138541455e-06	2.50847e-05
C9orf110	125.603043985765	-1.30245	0.230187672346425	-5.65821599061318	1.52954568254734e-08	1.07118e-07
C9orf116	118.952547499539	-0.844956	0.124573943593291	-6.78276509455728	1.17897253291362e-11	1.50043e-10
C9orf117	10.3622595799831	-1.88966	0.215237021854919	-8.77941708739539	1.64324077259406e-18	7.7924e-17
C9orf131	3.49725772066744	0.678628	0.159489505675186	4.25499844833016	2.0905046495327e-05	7.90684e-05
C9orf135	1.48754264423498	-2.58879	0.53068461730976	-4.87819917847394	1.07058787036724e-06	5.2678e-06
C9orf140	1068.96889199234	1.0519	0.165286819276035	6.36409736518432	1.96441504464722e-10	1.99721e-09
C9orf170	11.3073248307997	-1.06156	0.154644636429721	-6.86451757504529	6.67163270361979e-12	8.88184e-11
C9orf171	45.5404256141551	-3.11234	0.290189771596673	-10.7251754650326	7.75397665096076e-27	1.98849e-24
C9orf172	77.9412589166778	0.661458	0.128161016703095	5.16114524692975	2.45443648414559e-07	1.36716e-06
C9orf24	71.0202229970459	-1.79443	0.318154859518623	-5.64010920805213	1.69942345606192e-08	1.17829e-07
C9orf3	235.96021545526	-0.76557	0.0944696615449982	-8.10387233487484	5.32369695679306e-16	1.45117e-14
C9orf44	14.4648662681151	-3.89152	0.554686505278553	-7.01571368916948	2.28778114618846e-12	3.28584e-11
C9orf47	21.7680419141059	-1.78936	0.195951718788402	-9.13163578946052	6.747197078486e-20	4.09666e-18
C9orf64	194.379671544537	-1.41261	0.157535468016391	-8.96691901057824	3.04924167862409e-19	1.65083e-17
C9orf89	182.787975597043	-0.644898	0.12829168599216	-5.02681100399001	4.98703408309511e-07	2.61705e-06
CA10	580.655828450819	0.897711	0.208679173778119	4.30187373557151	1.69359816872832e-05	6.52724e-05
CA11	1594.49356344281	0.733817	0.16522911313406	4.44120759183223	8.94554438047844e-06	3.63e-05
CA13	79.4974542189148	-0.747705	0.126844159451364	-5.89467150518375	3.75427486418208e-09	2.99023e-08
CA2	1465.39970663597	-1.14322	0.1549438373794	-7.37828480040372	1.60341695719346e-13	2.81031e-12
CA3	197.862109225364	-4.08787	0.275528908522531	-14.8364603995267	8.5130861182748e-50	5.53067e-46
CA9	9.95153258373467	-1.77655	0.291196749376706	-6.10086222775131	1.05497812969537e-09	9.27867e-09
CABP1	220.143379428388	1.12973	0.232877969771189	4.85115681723603	1.22743447044514e-06	5.96427e-06
CABP4	11.0932384940794	-1.42237	0.171456187583016	-8.29581395254522	1.078442054591e-16	3.56856e-15
CACNA1A	647.002607743957	0.664503	0.126908507403475	5.23607855167529	1.64024166671491e-07	9.48052e-07
CACNA1B	220.652167100728	1.29159	0.222078165977021	5.81592739575803	6.0298635965017e-09	4.58712e-08
CACNA1H	306.490634359786	1.04503	0.156585763360997	6.67384751324671	2.49182532613256e-11	2.97766e-10
CACNA2D2	176.091149118322	1.0005	0.153421385042228	6.52127595153095	6.97117940565043e-11	7.70228e-10
CACNA2D3	89.095161489779	0.977656	0.214821491415735	4.55101482166396	5.33877866618249e-06	2.26497e-05
CACNG2	47.5629038673135	1.72561	0.280766702882211	6.14606432607041	7.94290822839527e-10	7.12413e-09
CACNG7	1459.71923872672	0.607421	0.0830500647598456	7.31391105124963	2.59476940175666e-13	4.38233e-12
CADM2	1319.99194504702	0.731432	0.122984710199112	5.94733722709881	2.72539558937721e-09	2.21417e-08
CALD1	2673.20838066481	-0.807779	0.0984880096936012	-8.2018030617676	2.36808017155856e-16	7.12251e-15
CALU	2349.57384485867	-0.890567	0.0951591787671037	-9.35870659923172	8.07187151381516e-21	5.89216e-19
CAMKV	551.956560490881	1.03658	0.230549659759106	4.49613866736633	6.91986168070054e-06	2.87934e-05
CAPG	1376.26081869969	-1.59232	0.157978157073768	-10.07938379272	6.81521792389591e-24	9.69552e-22
CAPN5	1744.90353081431	-0.869919	0.148218668305689	-5.86915711980456	4.38016197319158e-09	3.434e-08
CAPN9	8.36279485452046	-1.2224	0.238192002175852	-5.13197550471048	2.86716820151088e-07	1.57734e-06
CAPS	798.690308684859	-2.17744	0.202280992424894	-10.7644237814997	5.06775772035604e-27	1.35302e-24
CAPSL	17.646729894632	-3.97622	0.498503292546663	-7.97630808402428	1.50775314717104e-15	3.81638e-14
CARD14	28.4685348902426	0.761358	0.129737139401107	5.8684685609488	4.39838778073993e-09	3.44691e-08
CARD16	81.0893185012184	-1.93547	0.174110246097302	-11.1163389220554	1.04471579836901e-28	3.77065e-26
CARD6	137.149244909493	-0.69699	0.111878190773587	-6.22990469559978	4.66719010985256e-10	4.39225e-09
CARD9	127.651324294075	-0.614239	0.131020855393013	-4.68809895182036	2.75754683856827e-06	1.2438e-05
CASC1	54.8570646199493	-1.69157	0.173488656876233	-9.75029760113835	1.83928281234295e-22	1.93771e-20
CASKIN1	748.851093962985	1.14836	0.140084746685794	8.19763434004889	2.45163759947113e-16	7.29503e-15
CASP1	254.780232931917	-1.20789	0.121342245388157	-9.95437163372864	2.41342657369786e-23	3.13486e-21
CASP4	158.364251154658	-1.36338	0.132088429685721	-10.32168379966	5.62283020723961e-25	9.78473e-23
CASP5	3.42651281412715	-1.85137	0.321973813132032	-5.75005946214826	8.92120674290334e-09	6.55141e-08
CASP6	98.3583518675345	-0.932843	0.0934346182214847	-9.98391708697802	1.79247584327491e-23	2.37655e-21
CASP7	219.40604634173	-0.645137	0.0907207085155224	-7.11124082099145	1.15004265182336e-12	1.74024e-11
CASP8	135.952552677273	-1.29776	0.115734415342295	-11.2132888293963	3.5090760832429e-29	1.42483e-26
CASP9	816.777028205918	0.632562	0.103692740163196	6.10035351714988	1.05834132222669e-09	9.30405e-09
CAST	1548.07435597694	-0.763222	0.0745569362546675	-10.2367631603793	1.35700524810286e-24	2.09905e-22
CASZ1	154.415250406077	0.673565	0.141614563767465	4.75632366453245	1.97150290926384e-06	9.17712e-06
CATSPER1	1.13847279652538	-1.56815	0.359811303624764	-4.35824989660645	1.31106633562761e-05	5.17156e-05
CAV1	1191.23204924099	-1.214	0.201987030424347	-6.01031115316164	1.85167590595423e-09	1.54956e-08
CAV2	345.006738985332	-0.990666	0.1846866225131	-5.36403657255271	8.13824148277694e-08	5.00519e-07
CBFA2T3	107.547276592432	0.714222	0.124196555135309	5.75073663548904	8.88554393890774e-09	6.53014e-08
CBLN1	102.047827132156	1.13039	0.23014971265598	4.91152477422002	9.03708664446584e-07	4.50698e-06
CBLN2	100.880775501539	1.27211	0.23570184572174	5.39711397589169	6.77213711618903e-08	4.23292e-07
CBLN3	26.9766200045044	-0.911569	0.178668051884257	-5.10202804286655	3.36032943215968e-07	1.82228e-06
CBR1	1762.04169002396	-1.2884	0.174395317475285	-7.3878261301423	1.49248725584971e-13	2.63483e-12
CBS	3008.60356825326	0.651289	0.0992978766507681	6.55894338776283	5.41903687276834e-11	6.06646e-10
CCBL1	513.55228487808	0.684514	0.0937617186656285	7.3005740459555	2.86542545700173e-13	4.81026e-12
CCDC102A	139.261730219285	-0.66404	0.0895287545599631	-7.41706274628585	1.1974622535998e-13	2.14706e-12
CCDC103	924.564076382597	-1.12422	0.137136072117643	-8.19783631825323	2.44752299587658e-16	7.29503e-15
CCDC108	26.17875269419	-1.93534	0.262461754207749	-7.37381110888945	1.65818087742431e-13	2.89328e-12
CCDC109B	158.675544987274	-1.78977	0.170392459431506	-10.5038260884153	8.29483715821672e-26	1.66666e-23
CCDC11	64.5516839004351	-1.15508	0.162814115358673	-7.09444574652005	1.29870909847312e-12	1.94557e-11
CCDC114	16.0389806897792	-1.14322	0.211265616802273	-5.41129130615368	6.2571887015028e-08	3.93904e-07
CCDC122	19.649373187277	-1.15791	0.185337201972771	-6.24757626927544	4.16870740581822e-10	3.97107e-09
CCDC125	149.059528996334	-0.662327	0.101186885164753	-6.54557839536357	5.92655585743538e-11	6.59747e-10
CCDC129	12.4972063961849	-2.37766	0.517223944884675	-4.59697260243229	4.28673961806076e-06	1.85787e-05
CCDC13	63.0088208012207	-0.584289	0.128666832934524	-4.54109806213081	5.59619928879259e-06	2.36646e-05
CCDC135	51.9426915733722	-2.16603	0.235571570389761	-9.19476628538972	3.75810658674837e-20	2.41734e-18
CCDC138	44.1787944170127	-0.647503	0.117129316275944	-5.52810368191547	3.23710730206751e-08	2.13579e-07
CCDC144A	50.6758782328659	0.763006	0.158324906843105	4.81923989918999	1.44106189716145e-06	6.92122e-06
CCDC144B	60.5044369678594	0.941392	0.201878180287757	4.66316897172638	3.11376878701717e-06	1.39095e-05
CCDC144C	38.3022782727415	1.24056	0.166720313436369	7.44096572212181	9.99518825073797e-14	1.82403e-12
CCDC146	289.413845498939	-0.670377	0.140677073466622	-4.76536024509214	1.88516526478632e-06	8.82112e-06
CCDC148	16.5006445854514	-0.608456	0.129098022207836	-4.71313016870244	2.43940256569699e-06	1.11449e-05
CCDC150	23.4743661388163	-0.847479	0.20012944288155	-4.23465569539375	2.28902146894746e-05	8.59596e-05
CCDC151	106.328794105532	-0.693957	0.114573339244754	-6.0568838108682	1.38783755648906e-09	1.19421e-08
CCDC152	109.083441555714	-1.271	0.158393018038302	-8.02435996796744	1.02056631785585e-15	2.69159e-14
CCDC153	10.4415301971116	-1.91458	0.234578762800683	-8.16176764975144	3.30156840847219e-16	9.50481e-15
CCDC18	51.1166549165353	-0.846116	0.145301297768577	-5.82318553268298	5.77363984775767e-09	4.40769e-08
CCDC19	19.5368359006977	-3.51212	0.377843435478923	-9.29518529592519	1.46950014127054e-20	1.03396e-18
CCDC30	106.597913364078	-0.614374	0.0991042406364405	-6.19927527503486	5.67237457182461e-10	5.2247e-09
CCDC33	5.21774038549072	-4.36883	0.621575219945678	-7.02864875466144	2.08543216022626e-12	3.01745e-11
CCDC37	14.840790889467	-4.53421	0.505104100644388	-8.97678320916748	2.78798498831382e-19	1.52634e-17
CCDC40	267.078536154867	-1.22905	0.148707692160551	-8.26486079904192	1.39857844075163e-16	4.43946e-15
CCDC42B	33.0832230514836	-3.4308	0.325123898571529	-10.5522873610012	4.95752557418471e-26	1.06178e-23
CCDC46	134.347950200673	-1.19923	0.139206767803195	-8.61475783935006	7.00895793991092e-18	2.9189e-16
CCDC65	39.4256501120196	-2.54269	0.22772167189303	-11.1657880812217	5.99570923163074e-29	2.33713e-26
CCDC69	225.482108289376	-0.814799	0.114091012611767	-7.14165805425388	9.2211762312891e-13	1.42297e-11
CCDC74A	130.777674902511	-0.710504	0.126166569619429	-5.6314777041442	1.78672077040306e-08	1.23437e-07
CCDC74B	145.106114195289	-0.684976	0.143726710596905	-4.76582454813193	1.88082877108755e-06	8.80551e-06
CCDC8	131.234917405123	-1.95392	0.224587211778977	-8.70004457281451	3.31753841936336e-18	1.483e-16
CCDC81	35.3770130637831	-1.57556	0.177264884354714	-8.88816279541559	6.21276091564914e-19	3.16276e-17
CCDC89	44.0741544989751	-1.55202	0.17381688228534	-8.92906111232402	4.29639493896101e-19	2.27545e-17
CCDC96	100.463470869079	-0.874398	0.116529530507749	-7.50366236739904	6.20590279846841e-14	1.19048e-12
CCKBR	48.2640969170929	1.35095	0.300621149352821	4.49385919258462	6.99438862515248e-06	2.90724e-05
CCL2	582.108871964778	-0.982442	0.228044971634362	-4.30810512171897	1.64659127376411e-05	6.36242e-05
CCL20	2.25258431279667	-1.59132	0.315093609676053	-5.05029319757686	4.41132451989386e-07	2.33632e-06
CCL28	5.30348294820155	-1.34167	0.311537704721335	-4.30661581218519	1.65771156246568e-05	6.40158e-05
CCL5	94.1287993672263	-2.23222	0.215436035973744	-10.3613961758204	3.71499223406077e-25	6.64268e-23
CCNA2	152.35208663902	-0.920762	0.187977098146996	-4.89826903378998	9.66845975502803e-07	4.79243e-06
CCNB1	276.19886717752	-0.921836	0.157824575203492	-5.84088723298014	5.19235438073622e-09	3.99522e-08
CCR1	338.740617445266	-0.848683	0.146135262061233	-5.80751406204252	6.34072278173425e-09	4.80298e-08
CCR2	13.2900417432325	-2.77362	0.280390994804663	-9.89198280215155	4.51005129566914e-23	5.35981e-21
CCR4	1.27520447533405	-2.87806	0.508726307214062	-5.65738650025365	1.5369538938646e-08	1.07598e-07
CCR5	89.3498766414154	-1.68593	0.174941319984053	-9.6371376323313	5.57199954046695e-22	5.19609e-20
CCR7	6.47680274717762	-1.85022	0.249410267965779	-7.41837859765047	1.18562782866306e-13	2.12976e-12
CCRL2	57.4475572775774	-0.796722	0.119238496273743	-6.68175226733327	2.36101912619551e-11	2.82655e-10
CD101	55.6964786584837	-1.3364	0.195645247527033	-6.83074779809355	8.44731274624675e-12	1.10644e-10
CD109	315.941474356528	-1.66172	0.158035573912067	-10.5148597226501	7.37905338280902e-26	1.51387e-23
CD14	2088.78899624225	-0.8966	0.161091188073959	-5.56579309599378	2.60962741915456e-08	1.75506e-07
CD151	2166.87441034391	-0.730374	0.116116876277309	-6.2899909861846	3.17484405421121e-10	3.08617e-09
CD163	1274.69609142072	-2.05446	0.283600377939889	-7.2441950323815	4.35015060228423e-13	7.12474e-12
CD164	2521.77450107835	-0.668434	0.0683769610717997	-9.77572667345396	1.43126508932851e-22	1.54118e-20
CD180	116.525731725374	-0.928486	0.170071993410946	-5.4593702191764	4.7782646371184e-08	3.07152e-07
CD19	2.0789578450856	-1.33076	0.268974402310646	-4.94752572758424	7.51627720529663e-07	3.81093e-06
CD1D	27.0280561043433	-0.786564	0.175523182072366	-4.48125425159423	7.42056449945639e-06	3.06868e-05
CD2	29.0025427734903	-2.72167	0.269668146226774	-10.0926521971326	5.95387238225619e-24	8.59563e-22
CD200R1	3.58666214148247	-1.54371	0.221283844573914	-6.97613217012586	3.03417299397994e-12	4.26359e-11
CD226	18.3481961837259	-1.03245	0.173050430004347	-5.96619680607159	2.42847350104242e-09	1.98703e-08
CD247	17.6270829462427	-1.42566	0.177458063515453	-8.03377774375981	9.45163460189124e-16	2.50289e-14
CD248	171.360715167572	-1.32668	0.186885014374866	-7.09892195083205	1.2573378737141e-12	1.88794e-11
CD27	16.4736062096364	-1.23016	0.17185184255013	-7.15823331643143	8.17233813926723e-13	1.27627e-11
CD274	24.3373154005625	-1.42239	0.212786330306361	-6.68458016699525	2.31587599461652e-11	2.77934e-10
CD276	1460.63332609722	-0.623455	0.100145734028709	-6.22547534692319	4.80098146179725e-10	4.50294e-09
CD28	7.1093500411099	-2.05499	0.267763434056033	-7.6746399893976	1.65883874626948e-14	3.54893e-13
CD300A	309.457462125119	-0.753081	0.129729148452818	-5.80502203162005	6.43575409418928e-09	4.86551e-08
CD300C	48.8666643167815	-0.8737	0.138103500684282	-6.32641536903351	2.50921816540174e-10	2.49641e-09
CD300LB	5.94982970342075	-1.13619	0.23535022522279	-4.82765935780575	1.3814713272643e-06	6.6514e-06
CD300LF	44.3832065563191	-1.45081	0.164182940585671	-8.83654592708663	9.87234091995371e-19	4.82235e-17
CD302	787.508152575681	-0.848055	0.108618799868	-7.80762888358725	5.82738740723443e-15	1.32682e-13
CD33	132.167994466461	-0.644753	0.123251669340446	-5.23119406511541	1.68418584720999e-07	9.71147e-07
CD37	627.523779551487	-0.716291	0.136162517553732	-5.2605605121711	1.43616929457326e-07	8.38052e-07
CD3D	10.2218674458977	-3.04387	0.353226226474954	-8.61735088810548	6.85209087145152e-18	2.87817e-16
CD3E	34.8987980837224	-2.50929	0.261001574498615	-9.61407168773338	6.9735527244933e-22	6.38096e-20
CD3G	2.83096401236736	-3.55967	0.429787370654034	-8.28239068376712	1.20726764460769e-16	3.90858e-15
CD4	1464.77857276609	-0.627225	0.12164213321161	-5.1563159756734	2.51855761759879e-07	1.40088e-06
CD40	103.578095598535	-0.843385	0.108145244857176	-7.79863264418005	6.25815502574539e-15	1.41593e-13
CD40LG	2.26612574561663	-2.84664	0.391058883840526	-7.2793105740951	3.35530434283918e-13	5.56645e-12
CD44	7492.9747819186	-1.02677	0.162703854279862	-6.31066543319083	2.77838240345677e-10	2.73197e-09
CD48	54.5600045676923	-1.95186	0.238058067605392	-8.19907271090254	2.42248375761309e-16	7.24144e-15
CD5	14.841828316856	-2.05491	0.248464708180726	-8.27042312499352	1.33484422776908e-16	4.27194e-15
CD52	35.5729129921875	-1.65893	0.219018100021378	-7.57439382645675	3.60808332847161e-14	7.30993e-13
CD53	1090.24756868302	-0.826945	0.125042083010486	-6.61333529300319	3.75756041113971e-11	4.33342e-10
CD58	126.32155856648	-1.42652	0.117428445036649	-12.1479985037644	5.87871632571584e-34	4.58305e-31
CD6	24.5694614529251	-1.97442	0.197011630509743	-10.0218340840273	1.22213635433749e-23	1.67743e-21
CD63	9417.79046456896	-0.674258	0.0938413167778226	-7.18508493162628	6.71654211796558e-13	1.06605e-11
CD68	2610.50387207693	-0.8671	0.135036245748972	-6.42123592975767	1.35172338183928e-10	1.42252e-09
CD69	59.9909205456837	-1.29912	0.205889979875902	-6.30976346948485	2.79462239290854e-10	2.74394e-09
CD7	26.8302817831205	-1.22864	0.168923983537064	-7.27332675361964	3.50740536855954e-13	5.803e-12
CD72	39.0901414782769	-1.26308	0.169491499725034	-7.45219823862047	9.17976490428901e-14	1.69105e-12
CD74	28515.9969446714	-1.49484	0.157578618384682	-9.48630348837663	2.39372397365508e-21	1.96851e-19
CD79B	7.55304231837964	-1.46714	0.201463723672463	-7.28239544601516	3.27944086794395e-13	5.46761e-12
CD80	3.93177839448242	-2.21282	0.324069795864938	-6.82822166012503	8.5973678684913e-12	1.12458e-10
CD86	366.839571220846	-0.80539	0.131273197319509	-6.13522341440897	8.50395980933145e-10	7.57852e-09
CD8A	37.3455353100734	-1.62488	0.213375607661267	-7.61512992033774	2.63426362986509e-14	5.44452e-13
CD8B	10.0698371669226	-1.13861	0.186512068202402	-6.10475261657261	1.02960026738006e-09	9.08005e-09
CD93	628.953366395587	-1.01204	0.174895469095733	-5.78652439123189	7.18576570972411e-09	5.38449e-08
CD96	12.6871297592068	-2.85234	0.272982276122338	-10.4488073336108	1.48379385846278e-25	2.83521e-23
CD97	529.217308572772	-1.29487	0.156104232721704	-8.29491827444243	1.08659882846919e-16	3.58339e-15
CDC20	192.367826197496	-1.02875	0.231907778401788	-4.43605078097756	9.16242427887908e-06	3.71259e-05
CDC25C	34.7287010740215	-1.17372	0.25803064500428	-4.54874563396835	5.39666262593914e-06	2.28754e-05
CDC42BPG	3.67723487338146	-1.38612	0.224389307459546	-6.17730099633532	6.52066867629046e-10	5.93795e-09
CDC42EP5	14.5424175008783	-1.09713	0.186317338305935	-5.888494760843	3.89728900226307e-09	3.09528e-08
CDC6	105.935047875224	-1.10011	0.187108681522537	-5.87952482610371	4.11445889715804e-09	3.24922e-08
CDCA2	46.9255796674064	-1.3575	0.23615848648619	-5.74825386805022	9.01697845267349e-09	6.61675e-08
CDCA7	231.201831633665	-0.845309	0.163158485542654	-5.18090541945597	2.20811440484995e-07	1.24418e-06
CDCA7L	489.224911395273	-1.0406	0.172040000600499	-6.04861444313681	1.4609682434832e-09	1.25162e-08
CDCA8	127.729891717097	-1.07231	0.199952299314781	-5.36282001267177	8.19326367971861e-08	5.02792e-07
CDCP1	87.0947698327072	-0.992738	0.14472732769144	-6.85936762662344	6.91660356312319e-12	9.16415e-11
CDH10	633.392085956908	0.740393	0.122476589742553	6.04517893706419	1.49244270360126e-09	1.2741e-08
CDH13	611.871297629074	0.851146	0.156132780026648	5.45142602574596	4.99675064143375e-08	3.20456e-07
CDH18	94.4430936828808	1.02518	0.237942518121759	4.30850607333633	1.64360964070987e-05	6.35216e-05
CDH19	34.8178845712951	-1.78678	0.282310513526537	-6.32914719500078	2.46519860988732e-10	2.45638e-09
CDH20	1256.67048430201	0.713415	0.12816312447241	5.56645800687702	2.59969393926247e-08	1.74898e-07
CDH22	213.18084982308	1.07925	0.216601664766358	4.98263813374113	6.27231839290759e-07	3.22979e-06
CDH4	213.481062939138	-1.00155	0.177948677896106	-5.62830086884212	1.81993442662394e-08	1.25382e-07
CDH6	225.680227843972	-0.833614	0.139235046286453	-5.98710194722271	2.13612901400546e-09	1.76711e-08
CDH7	19.8541954330419	1.61189	0.29243773600326	5.51189733959558	3.54985967134453e-08	2.32561e-07
CDHR1	656.034406827789	1.23069	0.141357723603114	8.70623319465972	3.14140200082702e-18	1.40749e-16
CDHR5	3.41177354229308	1.03111	0.19626649995293	5.2536412821623	1.49121187115749e-07	8.67056e-07
CDK2	370.813659084495	-0.694871	0.114989608722486	-6.04290438302475	1.51364366131543e-09	1.28825e-08
CDK4	3223.6512256829	-0.811791	0.147577161777082	-5.50079105743573	3.78091051049554e-08	2.4662e-07
CDK5R1	1616.05991297623	0.910145	0.131645356861595	6.91361004189898	4.72472853320109e-12	6.43051e-11
CDK5R2	305.626119955041	1.10875	0.224776483526363	4.93267364410219	8.11116160636172e-07	4.08809e-06
CDKN2C	750.641256260382	-1.19341	0.170911548561842	-6.98262758481976	2.89709659941021e-12	4.09162e-11
CDKN3	56.2547299183958	-1.07809	0.188004957973904	-5.73436837916173	9.78763966622556e-09	7.14194e-08
CDR2	218.437909123402	-0.595401	0.0898194936385198	-6.62886177110265	3.38285172935200e-11	3.92919e-10
CDSN	16.8154616759154	-1.30875	0.292886278752513	-4.46845699401924	7.87858479270055e-06	3.23884e-05
CEACAM1	7.50075600967553	-1.56199	0.191442111771556	-8.15909264153534	3.37550678987773e-16	9.6748e-15
CEACAM21	34.4453048485173	-0.685444	0.157365038785549	-4.35575937793934	1.32606385847991e-05	5.22543e-05
CEACAM4	4.25549685736652	-1.4769	0.253720730684884	-5.82097668535352	5.85047311864329e-09	4.46285e-08
CEBPA	819.305842946251	-0.812208	0.128574840310902	-6.31700858760553	2.66674769362295e-10	2.63564e-09
CEBPD	741.91280959446	-0.798997	0.162531140067841	-4.91596555768545	8.83459302945498e-07	4.41956e-06
CECR1	889.206242808295	-1.17226	0.123446616779212	-9.49611244341201	2.17872481239646e-21	1.81467e-19
CECR2	288.025032512301	0.936541	0.0990176618599458	9.45832499475755	3.12915391965413e-21	2.48927e-19
CECR6	396.163812914091	0.766108	0.0869026076135888	8.81570746984526	1.18931643063647e-18	5.75181e-17
CELF3	650.868698935844	1.05845	0.18125601140018	5.83952202822996	5.23507947388678e-09	4.02651e-08
CELF4	466.578316135143	1.16967	0.241625528284632	4.84083762283865	1.29292988459829e-06	6.26534e-06
CELF5	690.768924781513	1.30029	0.16290455610903	7.98194104648433	1.44049830803049e-15	3.66518e-14
CELF6	231.335126175203	0.644493	0.125504961123345	5.13520100276365	2.81842632816678e-07	1.55288e-06
CELSR1	161.393186129825	-1.76546	0.227296405591482	-7.76719936167693	8.02404986000267e-15	1.79345e-13
CELSR3	772.239015973691	0.849896	0.136051366814406	6.246872819629	4.18751750895157e-10	3.98509e-09
CENPA	40.6695074303804	-1.10215	0.253904371344941	-4.34079472876334	1.419683033993e-05	5.56173e-05
CENPE	113.10269595957	-1.49178	0.233693998924024	-6.38348621349689	1.73101186372113e-10	1.78034e-09
CENPF	737.241162360345	-1.1334	0.226516437889148	-5.00359876879315	5.62698145642907e-07	2.92375e-06
CENPI	22.0793419211691	-0.958123	0.211299202055803	-4.53443851293574	5.77569237423469e-06	2.4376e-05
CENPK	54.5221595759703	-1.11132	0.231295493814366	-4.80476830959495	1.54930808663852e-06	7.38289e-06
CENPL	107.493433515753	-0.667927	0.0895095591489312	-7.46207887788166	8.51678707488503e-14	1.57488e-12
CENPN	203.461547380749	-0.752869	0.128766404544154	-5.84677794517919	5.01185819303786e-09	3.8747e-08
CEP135	168.790360265995	-0.883075	0.123969582378863	-7.12332070091189	1.05357283372273e-12	1.60674e-11
CEP152	60.7525384373288	-0.597865	0.138090457045597	-4.32951754233225	1.49436366907006e-05	5.82853e-05
CEP55	64.7477763103241	-1.15918	0.232524366869032	-4.98518274362597	6.190327641684e-07	3.19263e-06
CER1	1.49695235459865	-3.55246	0.577410172713287	-6.15240652018597	7.63159551592254e-10	6.87337e-09
CERKL	51.7399992801317	-1.08885	0.222045194712797	-4.90371798992058	9.40394735543846e-07	4.67678e-06
CES1	32.5020131072294	-2.25825	0.325273282087201	-6.94261177861058	3.84916161395578e-12	5.31304e-11
CETN2	1510.39050498059	-0.761731	0.0902142422242929	-8.44357442965818	3.07778240059787e-17	1.12333e-15
CFB	185.193856603386	-1.55897	0.167733932280549	-9.294304324329	1.48171976096838e-20	1.0388e-18
CFD	65.6086228526033	-1.02912	0.173576139815578	-5.92891271288869	3.04947125458504e-09	2.45697e-08
CFH	391.574776123538	-1.19778	0.158285499192343	-7.56724279365895	3.81228984016042e-14	7.66786e-13
CFI	607.905565558329	-1.90328	0.205911397792773	-9.24319778352601	2.39238221140166e-20	1.60785e-18
CG030	38.2472225113801	0.66041	0.120817006707528	5.46620464943334	4.59773492803292e-08	2.96329e-07
CGREF1	473.199148509295	0.713896	0.128138311249319	5.57129442308178	2.52853602969647e-08	1.70346e-07
CHAD	41.2502419133786	-2.98377	0.310095240974532	-9.62210189080632	6.44994665775178e-22	5.95779e-20
CHAF1B	95.0792230935129	-0.977992	0.174614212571453	-5.60087547036888	2.13271914411958e-08	1.45237e-07
CHD5	627.424532784062	1.16488	0.240733766748692	4.8388588490568	1.3058674450165e-06	6.32332e-06
CHEK1	159.172115868359	-0.674207	0.120801473405942	-5.58111808112233	2.38977324704222e-08	1.61556e-07
CHEK2	81.6242103271346	-0.713281	0.123675002109002	-5.76738041074513	8.05131782816448e-09	5.97336e-08
CHGA	780.450322344037	1.19487	0.246640486430494	4.84459177810317	1.26872261821577e-06	6.15569e-06
CHGB	1284.84280258343	1.13059	0.180716754611245	6.25616158933168	3.94567930823728e-10	3.77522e-09
CHI3L1	14691.2907650558	-3.44245	0.365818877272033	-9.41025961969505	4.94912938969211e-21	3.81259e-19
CHI3L2	1536.30055863603	-2.10896	0.24848672418476	-8.48719577157173	2.1168299357946e-17	7.88853e-16
CHIC2	199.633687511097	-0.606735	0.106102448600747	-5.71838909734074	1.0753866822333e-08	7.77133e-08
CHIT1	109.026652699219	-2.30559	0.33065352163618	-6.97282418827642	3.10640742674038e-12	4.34629e-11
CHMP4C	4.0939987391161	-0.958479	0.226267076167765	-4.23604947454858	2.27486674242583e-05	8.55434e-05
CHODL	85.377068628259	-2.69632	0.261911431738643	-10.2947949736968	7.43778533148128e-25	1.2285e-22
CHRM1	236.58993062014	1.14089	0.250169827215104	4.56045785817957	5.10422054808993e-06	2.17445e-05
CHRM4	30.8502959605481	1.22305	0.192021301955812	6.3693209531483	1.89866921240512e-10	1.9344e-09
CHRNA1	57.057933405307	-2.96669	0.378657424809237	-7.83475439562045	4.69760043048762e-15	1.08479e-13
CHRNA4	330.00096703466	1.15539	0.173627859704026	6.65438189291242	2.84493100509413e-11	3.35437e-10
CHRNA6	2.6650973693232	-2.0678	0.423221066627336	-4.88585937152586	1.02978684152324e-06	5.08501e-06
CHRNA9	20.4015927013692	-2.16298	0.399732726420565	-5.41105930632544	6.26530165279448e-08	3.94287e-07
CHRNB2	390.430287031473	0.883634	0.166796433951103	5.29768149494692	1.17282309592445e-07	6.96475e-07
CHST1	995.901354953057	0.917968	0.152348277154752	6.02545663855755	1.68632825469711e-09	1.42156e-08
CHST2	829.890010846772	-0.738334	0.135996100622912	-5.42908043535371	5.66451520154844e-08	3.59146e-07
CHST6	556.080573492876	-1.38643	0.168591310760954	-8.22362162045305	1.97448349708736e-16	6.03177e-15
CIITA	286.057441450597	-1.53614	0.202883087307181	-7.5715579290301	3.68774554873576e-14	7.45583e-13
CISH	52.6953823648245	-1.23858	0.151898756919221	-8.15397209562107	3.52162159395144e-16	1.0064e-14
CITED4	86.7212171559483	-0.870863	0.165401384854967	-5.26514755317606	1.40076806424756e-07	8.19357e-07
CKAP2L	80.0297857879622	-1.22533	0.254574675050206	-4.81323949061859	1.48503146112997e-06	7.11836e-06
CKM	1.77152623466737	-1.68614	0.281502272686394	-5.98980427495677	2.10093720752016e-09	1.74096e-08
CKMT1A	115.325288166431	1.17904	0.230628811902361	5.1122805737999	3.18292604128758e-07	1.73331e-06
CKMT1B	316.249456599747	1.17963	0.201563446699051	5.85241305496436	4.84491538162176e-09	3.76055e-08
CKMT2	47.8550692092292	-1.15657	0.188147982586706	-6.14711594334355	7.89044537475836e-10	7.08603e-09
CLCF1	60.3555715878253	-1.33167	0.246520123991217	-5.40186907961074	6.59500780359177e-08	4.13168e-07
CLCNKB	1.32548830710032	-2.61324	0.416381375835555	-6.27606325884181	3.47252946433149e-10	3.3538e-09
CLDN1	31.0886497051578	-1.134	0.174573691456352	-6.49579588367987	8.25955806804183e-11	9.00833e-10
CLDN23	15.8632050964699	-1.20957	0.150042681170879	-8.06151244097514	7.53562229386137e-16	2.02299e-14
CLDN9	22.6036013357209	0.90084	0.154625611353801	5.82594455398827	5.67904699010326e-09	4.33887e-08
CLEC12A	10.0219583717208	-2.60298	0.336781655623218	-7.72899600880784	1.08398072339984e-14	2.38451e-13
CLEC17A	26.4410184263713	-1.8126	0.276119927400358	-6.56454250338976	5.21928558617777e-11	5.86305e-10
CLEC18A	93.7697930139331	-1.14224	0.173249191351004	-6.59304180331425	4.30905178826522e-11	4.9315e-10
CLEC18B	106.484226622284	-1.44157	0.183671225412786	-7.84863434969846	4.20591905129167e-15	9.80543e-14
CLEC18C	18.4175490935409	-1.41401	0.226737228027343	-6.23631770134783	4.47990822086977e-10	4.23235e-09
CLEC2B	85.3586755925325	-0.927264	0.143767203721962	-6.4497604732012	1.12027065273773e-10	1.19247e-09
CLEC2L	83.6336807229296	1.4	0.29397684078747	4.76226390888551	1.91433100274153e-06	8.93874e-06
CLEC4GP1	7.21679218938849	1.97693	0.359120597911255	5.504930958903	3.69312972336215e-08	2.41298e-07
CLEC5A	67.8030925550951	-2.47673	0.2667584350719	-9.28454016316561	1.62406923992182e-20	1.13452e-18
CLEC7A	170.548703030168	-0.857201	0.155108284544254	-5.52646863497955	3.26740640346538e-08	2.15359e-07
CLECL1	10.0739052491492	-1.31891	0.230815612788558	-5.71411760400128	1.10274719357133e-08	7.94843e-08
CLIC1	1423.26222666674	-1.33784	0.136104348779844	-9.82954415964885	8.39981138332101e-23	9.30184e-21
CLIC3	3.85103105908637	-1.48977	0.271605389125163	-5.48506398371323	4.13319790701364e-08	2.68163e-07
CLIC6	16.8178491600442	-1.67329	0.319018530892546	-5.24512934119048	1.56172728972008e-07	9.05356e-07
CLSPN	62.9290955052455	-1.20084	0.25119562919929	-4.78049453650055	1.74864511153902e-06	8.25208e-06
CLU	195436.126620399	-1.00984	0.141673993735663	-7.127942442253	1.01880359802719e-12	1.55615e-11
CLYBL	91.8927720781282	-0.629529	0.110106779545634	-5.71743662507463	1.08142987548216e-08	7.80632e-08
CMAH	52.1353857764546	-0.981729	0.157321294788179	-6.24028185343552	4.36783142313713e-10	4.13649e-09
CMPK2	208.999556377734	-1.4135	0.18462456312135	-7.65608580104015	1.91685682970351e-14	4.06082e-13
CMTM3	1235.51011348566	-0.697862	0.0842175650296797	-8.28641462440597	1.16713404908751e-16	3.79757e-15
CMTM6	1066.74914204845	-0.627545	0.0706049515719622	-8.88811962390834	6.21517476757985e-19	3.16276e-17
CMTM7	161.086576769512	-0.750591	0.118432183284398	-6.33773199812546	2.33171954077538e-10	2.33651e-09
CMYA5	290.903423176354	-1.90829	0.272488964787985	-7.00318401248552	2.50209851783999e-12	3.57259e-11
CNGA3	385.932703304578	-2.30662	0.257322252577394	-8.96395446280664	3.13238376602726e-19	1.68647e-17
CNKSR1	50.4909879972646	0.965257	0.165846643738047	5.82018078678683	5.87840094104607e-09	4.48064e-08
CNPY1	19.6682235381978	-1.21608	0.251953864180176	-4.82661635166721	1.38872274749325e-06	6.68301e-06
CNPY4	498.707700658371	-0.742645	0.0786574262102939	-9.44151636854872	3.67423068061984e-21	2.85302e-19
CNRIP1	1514.8642128919	0.681061	0.0785850309491594	8.66655161925437	4.45404833594349e-18	1.93339e-16
CNTN3	299.132084700055	1.66232	0.222685658702757	7.46489281231761	8.33674489132698e-14	1.54746e-12
COBL	2018.34415096395	-0.580068	0.132136265238815	-4.38992216347843	1.133912410512e-05	4.5215e-05
COL12A1	222.114203243457	-1.55342	0.216604438800282	-7.17169465828824	7.40750138065516e-13	1.16523e-11
COL14A1	357.881453849233	-1.23162	0.25634493389966	-4.80453879551516	1.55108624903983e-06	7.38956e-06
COL15A1	71.365942289259	-1.59861	0.236809879839518	-6.75061171591848	1.47223109791493e-11	1.83699e-10
COL18A1	1336.05069450864	-0.684992	0.135225192234532	-5.06556286078264	4.07195376027996e-07	2.1755e-06
COL1A1	903.745659325204	-2.03783	0.246105487572019	-8.28029896977387	1.22866420559915e-16	3.96468e-15
COL1A2	1505.48666518382	-1.72242	0.204055168038601	-8.44096687090765	3.14723348681621e-17	1.1444e-15
COL21A1	58.9822869416106	-1.94357	0.264438432631043	-7.34978341665681	1.98528275812527e-13	3.42115e-12
COL3A1	805.372152961961	-2.1521	0.254486645411923	-8.45663840819015	2.7519558142989e-17	1.01391e-15
COL4A1	2346.37647358068	-1.85395	0.225417529456511	-8.22449956785836	1.96007501081896e-16	5.99715e-15
COL4A2	2814.84166139642	-1.72448	0.203123890580023	-8.48978481134997	2.07020066724991e-17	7.74438e-16
COL5A1	307.854897668411	-1.8873	0.266416065625782	-7.08401405409433	1.40037696848847e-12	2.08346e-11
COL5A2	696.677689977716	-1.62127	0.213882354384383	-7.58017768102698	3.45082038119541e-14	7.02051e-13
COL6A2	982.938362217796	-1.82429	0.214060576542354	-8.52229147954222	1.56427112370578e-17	6.07716e-16
COL6A3	138.548867943234	-1.92313	0.245557013289581	-7.83169088801571	4.81351815903014e-15	1.10893e-13
COL6A4P2	17.2138197218508	1.12173	0.256155991160425	4.37909938518959	1.19170778239916e-05	4.73718e-05
COL7A1	305.396417531634	1.19925	0.182451385182586	6.57297649720323	4.93192456923451e-11	5.57559e-10
COL8A1	116.473988174639	-2.28247	0.318039652517137	-7.17667637732756	7.14264886088809e-13	1.12721e-11
COL8A2	349.202274530063	-1.39384	0.165186997377405	-8.43794446704809	3.2296699997979e-17	1.16783e-15
COLEC12	666.640378743206	-1.55946	0.181215187906631	-8.6055524711723	7.59500461837655e-18	3.1495e-16
COPZ2	179.733607871533	-1.1441	0.138367118949506	-8.26856819574659	1.35577346539618e-16	4.31765e-15
CORO6	67.8036391903997	1.07171	0.183999814792929	5.82450962346596	5.72805375872188e-09	4.3746e-08
CORT	43.5495157771569	0.843361	0.173415650793569	4.86323360489868	1.15483416921977e-06	5.64669e-06
COTL1	3858.67426734864	-0.628067	0.0988793262326026	-6.35185102296351	2.12739305561538e-10	2.14722e-09
CP	1168.51612339027	-2.53246	0.246585254202595	-10.2701338096203	9.60713149580469e-25	1.54746e-22
CPA4	8.06817744382542	-2.30685	0.295834797207861	-7.79776789960346	6.30117661488759e-15	1.42306e-13
CPA5	1.53446632848797	-2.43624	0.425795628593763	-5.72162727798426	1.05508572461597e-08	7.64731e-08
CPEB3	296.555376508459	0.665964	0.103758246387877	6.41842245404258	1.37693714600229e-10	1.44593e-09
CPLX1	604.798405834064	1.36972	0.1881204483659	7.2810952292032	3.31120831121804e-13	5.51585e-12
CPM	843.533822918508	-0.938536	0.173897533353537	-5.3970653672456	6.7739713870871e-08	4.23292e-07
CPNE5	1019.85966359434	0.976821	0.160709379608648	6.07818114669135	1.21553395593982e-09	1.05839e-08
CPPED1	286.470247495282	-0.98994	0.118738380423227	-8.33714959202584	7.61027598761853e-17	2.60675e-15
CPVL	620.734167506459	-1.33478	0.146533771793073	-9.10904960723617	8.31067726059159e-20	4.93827e-18
CPXM2	127.06407170004	-2.00235	0.260649131008176	-7.68215200832387	1.56438049766947e-14	3.3579e-13
CPZ	54.7500327992856	-1.32568	0.269876360939972	-4.91215954039644	9.00787085134387e-07	4.49471e-06
CR1	10.9648783480683	-1.70264	0.253184458655397	-6.72490585790294	1.75706006697878e-11	2.15107e-10
CRB2	912.125911198035	-1.57432	0.183361867729015	-8.58585482844328	9.01634649809334e-18	3.6534e-16
CREB5	1066.36798760881	-0.612743	0.130350197508193	-4.70074278740787	2.59216855551588e-06	1.17903e-05
CRH	10.8701000840278	1.7807	0.386603932112058	4.60601100242926	4.10466681279946e-06	1.78531e-05
CRHR1	44.5285044540114	1.13015	0.193788804414619	5.83185018673957	5.48161252123275e-09	4.2012e-08
CRIP1	73.8551763819028	-1.19608	0.173463904940676	-6.89524649754217	5.37714817833187e-12	7.27277e-11
CRISPLD1	1527.82302368544	-1.42902	0.138544785949486	-10.3145263934895	6.05792430813108e-25	1.04486e-22
CRTAC1	810.102006335139	1.34504	0.167045660458257	8.05193669996858	8.14940552405758e-16	2.1728e-14
CRTAM	3.11454722875293	-2.29549	0.291583541791489	-7.87248932529428	3.47653344458795e-15	8.21305e-14
CRTC1	1466.286016406	0.619527	0.0747335062238978	8.28981290603569	1.13426742374288e-16	3.70921e-15
CRY2	1685.28601419523	0.735068	0.0983178239290744	7.47644394444884	7.63606923449369e-14	1.43933e-12
CRYZ	542.028867403265	-0.672886	0.0891012135307598	-7.55192471122742	4.28872400917483e-14	8.50328e-13
CSDA	1038.80213202365	-0.910773	0.137103436876631	-6.64296139645625	3.07442384040139e-11	3.6075e-10
CSDAP1	12.1664269207345	-0.836184	0.156761564659693	-5.33411671627479	9.60107552241763e-08	5.80412e-07
CSDC2	1575.63118237266	1.07816	0.201856382770157	5.34123005248813	9.23180107313947e-08	5.60523e-07
CSF2RB	102.388220343473	-0.992836	0.145775197212213	-6.81073172737542	9.71035628182404e-12	1.25417e-10
CSF3R	482.677421023093	-0.583991	0.123228882596733	-4.73907278775196	2.14698377874862e-06	9.89939e-06
CSMD1	351.605151271786	0.998097	0.170005685293469	5.87096188486193	4.33273883933219e-09	3.40504e-08
CSMD2	705.356845640191	0.765869	0.124775745984076	6.13796264099075	8.358651224071e-10	7.46267e-09
CSMD3	538.528187491361	1.58691	0.204159715968875	7.77288722783473	7.67170379339647e-15	1.72062e-13
CSNK1E	4626.97752173785	0.607868	0.0757566046060456	8.02396667277582	1.02384090608443e-15	2.69658e-14
CSPG5	4811.23701697935	0.700567	0.14084154428924	4.97414746282591	6.55354093911151e-07	3.36363e-06
CSRP1	7379.02776349939	-0.868096	0.163517429231527	-5.30888817458358	1.1029597444551e-07	6.58599e-07
CST3	24051.1607435385	-0.783005	0.169969593491095	-4.6067369477759	4.09036911540512e-06	1.78029e-05
CST7	13.0770464804621	-1.91095	0.224415101121742	-8.51522940776574	1.66260835036293e-17	6.39137e-16
CSTA	24.0117107302474	-2.07703	0.243775420717105	-8.52024120939157	1.59221363634708e-17	6.145e-16
CTBS	277.374115821031	-0.778743	0.0922021635621255	-8.44603656220336	3.01359346074333e-17	1.10197e-15
CTF1	87.2579274898916	-1.27729	0.154555783025308	-8.26424373874227	1.40583111723561e-16	4.45523e-15
CTHRC1	47.0547820532175	-1.32308	0.228852701060297	-5.78135652717674	7.41006615830884e-09	5.5313e-08
CTLA4	7.27091454386987	-1.73994	0.246389125497484	-7.06176133716387	1.64405187751769e-12	2.41139e-11
CTNNA1	6558.67547815326	-0.588508	0.0547099973531692	-10.7568681084864	5.50079650286949e-27	1.44879e-24
CTSA	1969.29336478562	-0.681335	0.0696264870382389	-9.78557711877147	1.29852350253007e-22	1.42181e-20
CTSB	14989.7819102547	-0.663441	0.0862747300329525	-7.68986743281656	1.47287557389659e-14	3.17197e-13
CTSC	1048.04606291669	-1.27112	0.142696751412429	-8.90785732237428	5.20282944419323e-19	2.71131e-17
CTSK	201.000206486407	-1.26389	0.186212594414576	-6.78735029071209	1.14211673063724e-11	1.45966e-10
CTSS	1012.92502819612	-1.0607	0.128940223319953	-8.22628570757604	1.93108087250738e-16	5.91773e-15
CTSW	16.9842533514708	-2.02267	0.246910174411668	-8.19193902774628	2.57050856471278e-16	7.59079e-15
CTSZ	1846.263382873	-0.993798	0.116612560779645	-8.52221678251397	1.56528060087034e-17	6.07716e-16
CTTNBP2	1227.22784457319	0.862433	0.110407258298746	7.81137786950303	5.65661460020975e-15	1.28944e-13
CUBN	87.4447249187033	-0.734354	0.140975916501116	-5.20907571645543	1.89783660112697e-07	1.0844e-06
CUX2	237.645425806211	1.71551	0.239238242069877	7.17071820233504	7.460533109402e-13	1.17168e-11
CXCL10	111.57252980923	-3.50275	0.31637043507348	-11.0716769605515	1.72148606565708e-28	5.78479e-26
CXCL11	25.00734456243	-2.81321	0.297847633397537	-9.44514392771772	3.54916215145426e-21	2.78332e-19
CXCL14	918.244544406944	-1.45673	0.292102916141463	-4.98703904763653	6.13116772602277e-07	3.16547e-06
CXCL9	63.5222240671765	-3.33977	0.294247965906711	-11.3501793053422	7.40107719728707e-30	3.35458e-27
CXCR2	16.7674152647441	-1.19248	0.169207022846913	-7.04744100818325	1.8223804402925e-12	2.65457e-11
CXCR3	5.77817051929081	-2.72548	0.329269309124078	-8.27734640297836	1.25950434360654e-16	4.05748e-15
CXCR4	714.37092889614	-0.990991	0.141584927418353	-6.99927152078677	2.57296798563495e-12	3.66305e-11
CXCR6	12.2886513255625	-2.62337	0.287429021783655	-9.12701685019253	7.04127632052072e-20	4.24875e-18
CXorf1	90.7289672320941	0.733609	0.122098962605245	6.0083145380372	1.87461891302611e-09	1.5654e-08
CXorf21	55.7325944781381	-0.694434	0.160618395694339	-4.32350099306628	1.53572446601751e-05	5.97431e-05
CXorf22	3.86795397673383	-2.98458	0.420063072859131	-7.10507541306956	1.20256856313689e-12	1.80989e-11
CXorf30	5.22610636588084	-2.98087	0.51211394905712	-5.82071273609731	5.85972067742238e-09	4.46815e-08
CXXC4	57.992692557148	0.857415	0.153625244047774	5.58121350450022	2.38846229723252e-08	1.61524e-07
CYB561	432.155133785338	-0.779621	0.120394218948066	-6.47556602532671	9.4457171552487e-11	1.02143e-09
CYB5D1	553.942582874484	-0.611371	0.073774330508874	-8.28704907568134	1.16092744372485e-16	3.78369e-15
CYB5R1	964.098526916477	-0.895731	0.105981163820683	-8.4517915820362	2.86866353622756e-17	1.05491e-15
CYB5R2	101.988912661936	-1.041	0.232431129520802	-4.47876557852624	7.5075924529157e-06	3.10203e-05
CYBA	1043.75274998436	-0.787871	0.126194089112871	-6.24333123137556	4.28348457480859e-10	4.06649e-09
CYBB	1621.51964309331	-0.812655	0.138853963773794	-5.85258410728675	4.83993344391336e-09	3.75968e-08
CYBRD1	2120.4238236529	-0.820524	0.109012049825435	-7.52691324926562	5.19538623503353e-14	1.01157e-12
CYP11A1	24.4467048478127	-1.62946	0.28040246427502	-5.81114775970641	6.2045968460538e-09	4.70719e-08
CYP1B1	253.404558357454	-0.925225	0.20620828769165	-4.48684477424063	7.22856997577435e-06	2.99805e-05
CYP27A1	973.800187464013	-1.01361	0.149371447563707	-6.78584090121551	1.15412282420367e-11	1.47404e-10
CYP27B1	22.7229431672019	-1.70003	0.246753122596196	-6.88960505551329	5.59474950278795e-12	7.55136e-11
CYP2B7P1	17.676997886323	0.889422	0.14905850833554	5.9669335972731	2.41753734488608e-09	1.97974e-08
CYP2D6	20.0168153132934	0.930613	0.195954193235254	4.74913491758788	2.04288626377742e-06	9.47997e-06
CYP2E1	81.2869074675816	0.954926	0.164827800177956	5.79347722699122	6.89438377140825e-09	5.1833e-08
CYP2S1	36.6218239439647	-0.836935	0.131291110337533	-6.37465005815504	1.83381187140093e-10	1.8742e-09
CYP39A1	26.8317201104588	-1.15343	0.172830865730069	-6.67372568914822	2.49389575094095e-11	2.97831e-10
CYP3A43	2.45394990223967	1.14721	0.259228200277844	4.42546417435583	9.62351276710549e-06	3.88569e-05
CYP4F11	131.227656694836	-1.18959	0.191151436202299	-6.22328247663975	4.86859660962277e-10	4.5554e-09
CYP4F3	29.8727229614424	-1.47037	0.32426603716151	-4.53445620922682	5.7752081888573e-06	2.4376e-05
CYTH4	464.058776078531	-0.669839	0.126690585344876	-5.28720073729959	1.24202320259824e-07	7.33102e-07
CYTIP	76.2069109321233	-1.19637	0.147447984634741	-8.11386099730212	4.9036230335702e-16	1.35179e-14
CYTL1	123.886375552588	-0.593098	0.127197151815356	-4.66282637641264	3.11895882118663e-06	1.39232e-05
DACH2	96.3223848641628	1.78557	0.251178120098802	7.10876611550489	1.17084964502905e-12	1.77035e-11
DAO	96.7164050341369	-2.42219	0.557556374831698	-4.34428826589806	1.39727936826334e-05	5.48609e-05
DAPP1	43.3452346739521	-1.23637	0.161470119709213	-7.65696097427577	1.90384455439181e-14	4.03764e-13
DARC	147.856551114076	-0.765682	0.176457135438353	-4.33919298775275	1.43006898308018e-05	5.59455e-05
DBNDD1	607.857024601671	-0.848889	0.156411269507937	-5.42729048959306	5.7215966861766e-08	3.62647e-07
DCBLD2	620.540288471867	-0.671116	0.107792774444041	-6.22598777471035	4.78531381651772e-10	4.49257e-09
DCDC1	2.44110211469664	-1.76666	0.335420788313664	-5.26698296863536	1.38684067642328e-07	8.12918e-07
DCDC2	46.6040334694164	-2.39916	0.226192478095524	-10.6067344123497	2.77271005063405e-26	6.35766e-24
DCHS2	126.043706745974	-1.04619	0.21717118925379	-4.81734256032675	1.454828005533e-06	6.97873e-06
DCN	1173.33714214714	-0.651876	0.151392123314431	-4.30587632804992	1.66325965651074e-05	6.42174e-05
DCTD	908.391437636706	-0.755283	0.0921121036495915	-8.19960642928254	2.41175315978048e-16	7.22044e-15
DDB2	226.252590866993	-1.08275	0.123984438381456	-8.73294924380961	2.48116451470427e-18	1.13783e-16
DDIT3	719.839097472634	-0.772382	0.140948422891389	-5.4798932649152	4.25582494530746e-08	2.75751e-07
DDIT4L	165.837985575684	-2.78696	0.28300928026359	-9.84759110186684	7.0206440724399e-23	8.09659e-21
DDN	652.410422960187	1.28036	0.293335312062404	4.36482471075032	1.27224736505198e-05	5.02658e-05
DDX58	409.146628340677	-0.630975	0.110783346357183	-5.69557704415617	1.22955345573406e-08	8.78124e-08
DDX60	416.932787827815	-0.761945	0.128428995289175	-5.93281176303631	2.97790199396267e-09	2.40428e-08
DDX60L	298.10723395431	-0.891124	0.123706254760453	-7.20354646462192	5.86662770529669e-13	9.40301e-12
DEF6	279.408669192194	-0.704418	0.118976797603746	-5.92063672274161	3.20697553689228e-09	2.5743e-08
DENND1C	122.83533310539	-0.713634	0.122440361461092	-5.82842005609089	5.59545904299715e-09	4.28234e-08
DENND2A	2077.02793244393	-0.720832	0.122504277425436	-5.88413996458979	4.0012912851698e-09	3.16498e-08
DENND2D	75.1989764474639	-1.72587	0.165623533314486	-10.4204537356223	1.99996772385132e-25	3.6773e-23
DENND3	916.064515129727	-0.610792	0.11747216200391	-5.19946253393822	1.99865607265704e-07	1.13601e-06
DEPDC1	55.3776372477516	-1.36189	0.25788771644274	-5.28092970986224	1.28529997140034e-07	7.57728e-07
DERL3	38.1545156586956	-0.945502	0.16224357109965	-5.82767165128529	5.62060267726493e-09	4.29759e-08
DES	49.004604147745	-2.05458	0.373073554333708	-5.50717362891814	3.64640578040303e-08	2.38645e-07
DGCR10	14.5006002697077	1.49572	0.184174621144953	8.12120270616057	4.61586331470509e-16	1.28153e-14
DGCR6	1480.26565566912	0.823993	0.150275133552066	5.48323016208738	4.17629092620704e-08	2.70868e-07
DGCR9	121.205141102667	1.4902	0.147955334303989	10.0719375197194	7.35153626512325e-24	1.03827e-21
DGKB	610.785292516798	0.87825	0.165892977919239	5.29407490794584	1.19620395946975e-07	7.08633e-07
DGKK	14.0305799140346	2.38972	0.425778855015291	5.61259372766433	1.9931618581864e-08	1.36352e-07
DHH	4.73049202222072	-1.17719	0.247289850468025	-4.76035364257286	1.93254034064824e-06	9.01729e-06
DHX58	322.003467324735	-0.86837	0.12954211549773	-6.70338342146929	2.03648176339262e-11	2.46835e-10
DIAPH3	64.0518895795112	-0.897835	0.144238083055454	-6.22467098244518	4.82567619179649e-10	4.52393e-09
DIRAS3	249.870082741823	-1.38781	0.202486469673383	-6.85383615662211	7.18954227647189e-12	9.51284e-11
DKFZp434J0226	32.049371769002	1.73476	0.289043249666602	6.00172582316999	1.95231170863919e-09	1.6247e-08
DKFZp686O24166	74.9620175426525	0.96208	0.163506295005654	5.88405729893395	4.00329142099419e-09	3.16528e-08
DKK1	42.8772361418446	-2.37115	0.330285935227279	-7.17908533140778	7.0179336339117e-13	1.11022e-11
DKKL1	3.78966852877433	-1.69574	0.299097433549964	-5.66950808693546	1.43208091522389e-08	1.00984e-07
DLC1	838.817061840738	-0.694432	0.136363890660337	-5.09249203810629	3.53387558971903e-07	1.90972e-06
DLEC1	167.011249717672	-1.12285	0.195674974712128	-5.73833422585186	9.561228733763e-09	6.98719e-08
DLG3	623.613379820098	0.669354	0.0991407096937075	6.75155394487785	1.462699811918e-11	1.82744e-10
DLG4	1969.24279740998	0.768424	0.105948966424515	7.25277300579956	4.08324093708305e-13	6.7045e-12
DLGAP1	669.851003526099	1.11961	0.162016202186943	6.9104905079707	4.82980757406991e-12	6.56436e-11
DLGAP2	90.1891672481145	1.08887	0.24277279072563	4.48512990710651	7.28695246151103e-06	3.01855e-05
DLGAP3	272.482555145236	1.23085	0.185852036853989	6.62275629796884	3.52562019925642e-11	4.08285e-10
DLGAP5	80.527862287811	-1.34059	0.29741394011719	-4.50747245558944	6.56044440666823e-06	2.74208e-05
DLL1	1788.04412887917	0.986747	0.156035073723129	6.32388221630273	2.55072180180555e-10	2.53124e-09
DLL3	4518.96242764573	1.33552	0.211831218265073	6.3046618282659	2.88823810459627e-10	2.82873e-09
DMC1	2.74338205299213	-1.80722	0.265298969942041	-6.81200454914438	9.62480626720538e-12	1.24643e-10
DMRTA2	93.4294038408362	-3.05861	0.352694104983848	-8.67212225664234	4.24139906087656e-18	1.84933e-16
DNAH11	29.4457032749118	-4.75223	0.327524698528363	-14.5095271615274	1.05444909122898e-47	4.49326e-44
DNAH12	14.0454171350256	-0.984895	0.233270343825653	-4.22211805664503	2.42017283156631e-05	9.05185e-05
DNAH2	20.715234460524	-1.5742	0.245878071677382	-6.4023583146467	1.52995086913461e-10	1.59288e-09
DNAH5	94.2494790822665	-1.93486	0.217194461378532	-8.90843201830456	5.17593575749794e-19	2.70453e-17
DNAH6	64.3423331824445	-1.65246	0.228696250515472	-7.22558790919406	4.9893858886309e-13	8.08339e-12
DNAH9	313.411408691159	-1.89663	0.210377893959429	-9.01535515389519	1.96233585369306e-19	1.1183e-17
DNAI1	19.9449903282249	-2.01287	0.273541271401654	-7.35856220086176	1.85901630479233e-13	3.22638e-12
DNAI2	4.94904650579002	-1.20807	0.287578113084559	-4.20085253065232	2.65911762147432e-05	9.87542e-05
DNAJB13	6.79121419813155	-1.85293	0.269312958796467	-6.88021052546875	5.97641721335646e-12	7.99453e-11
DNAJB7	3.1252039778145	0.817784	0.175088917339956	4.67067709628772	3.00208534932156e-06	1.34445e-05
DNAJC22	32.1036548242894	-1.38968	0.175707513412321	-7.90903539028995	2.5939087249418e-15	6.26459e-14
DNAJC5B	3.35637941574211	-1.735	0.322811128737044	-5.37464974377555	7.67316920755314e-08	4.7431e-07
DNALI1	1008.90484762489	-1.18186	0.115147635613294	-10.2638491907924	1.02536202178203e-24	1.62474e-22
DNASE1L2	51.1533302805276	0.809644	0.151004344303729	5.36172493471706	8.24309946416958e-08	5.05532e-07
DNM1	2089.73240059336	0.930751	0.218728299552285	4.25528299480497	2.08784773843333e-05	7.89832e-05
DNM3	1539.12586952684	0.879904	0.103610874973276	8.49238718898814	2.02435273666904e-17	7.61672e-16
DOC2A	219.87061952745	1.15469	0.246841053691318	4.67788845093683	2.89844139854357e-06	1.30193e-05
DOC2B	23.3174383513185	1.06576	0.223160711558556	4.7757605895846	1.79029286309854e-06	8.42414e-06
DOCK2	602.029531390373	-0.661555	0.137319664509355	-4.81762712010531	1.45275535703333e-06	6.97394e-06
DOCK3	905.325318757627	0.620315	0.098186275367074	6.31773601106142	2.65422906843688e-10	2.62594e-09
DOCK8	722.414512243561	-0.598599	0.130306314084558	-4.59378147368411	4.35285208749389e-06	1.88359e-05
DOK1	398.065738940709	-0.583281	0.1009349590115	-5.77878351347028	7.52426675986328e-09	5.60795e-08
DOK2	18.3822649065712	-1.32307	0.199459370433341	-6.63329354294876	3.28278033663387e-11	3.82435e-10
DOK3	199.776122418579	-1.05301	0.125526403114182	-8.38878300969665	4.91200370444765e-17	1.72495e-15
DOK4	307.134567070834	0.645421	0.117916325749695	5.47354859460614	4.41111847881303e-08	2.85245e-07
DOK6	354.66278488238	1.07784	0.181528355286544	5.93757840859982	2.89262716228125e-09	2.34417e-08
DOK7	12.4684617428682	-1.50358	0.210430970592143	-7.14525661794138	8.9827916436246e-13	1.38838e-11
DPEP1	46.5515681039739	-2.0519	0.417267434188016	-4.91747615951708	8.76671294826643e-07	4.39124e-06
DPEP2	62.4170420995483	-0.731652	0.140062841051798	-5.22374020433301	1.7534474752399e-07	1.00781e-06
DPF1	471.080941352649	0.603033	0.106382704859556	5.66852882673169	1.44028840904041e-08	1.01506e-07
DPP4	31.687143090502	-2.24387	0.23277209686124	-9.6397714593516	5.43087508424607e-22	5.11342e-20
DPY19L1	1573.77645663371	-1.12217	0.102678350586494	-10.9289657821068	8.37980127175015e-28	2.62073e-25
DPY19L2P1	21.6081274753914	-1.15123	0.240588020919749	-4.7850873132448	1.70913017613043e-06	8.08126e-06
DPYD	304.375508012003	-2.04587	0.158492407516401	-12.9082996693065	4.04126383831307e-38	7.16038e-35
DPYSL4	1279.10029655602	0.651422	0.108020393026928	6.03055061143201	1.63401985889099e-09	1.38345e-08
DRAM1	208.688114498116	-0.713083	0.11169914114275	-6.38395942075102	1.72566837035124e-10	1.77633e-09
DRD2	67.1326016707954	0.92932	0.195869021173745	4.74460088629361	2.08917837970649e-06	9.65799e-06
DRD5	9.17543424043951	1.56972	0.370561074667443	4.23607445615322	2.27461379962863e-05	8.55434e-05
DRP2	420.324282323838	0.60113	0.110447984194044	5.44265115373323	5.24933842745821e-08	3.35441e-07
DSC2	94.398288352579	-1.10313	0.149651236233063	-7.37133005737394	1.68934016968786e-13	2.94501e-12
DSCAM	1153.32848357558	1.00231	0.139162365926614	7.20244538278872	5.91421355631106e-13	9.46371e-12
DSCAML1	1029.39355341606	1.16924	0.151794135389842	7.70279191970395	1.33125043481892e-14	2.89366e-13
DSCR6	1.35848809500003	-2.40852	0.477047422022849	-5.04881525844856	4.44558375661423e-07	2.35319e-06
DSG2	47.5125640346835	-4.6572	0.395670494189756	-11.7703972794687	5.54627045660363e-32	3.00269e-29
DSN1	229.886643499635	-0.650046	0.0989525049324081	-6.56926977660572	5.0562604633885e-11	5.69633e-10
DTHD1	12.2049388407055	-1.59317	0.276556809415372	-5.76074097260373	8.37454751840969e-09	6.1943e-08
DTL	157.885873555314	-0.962486	0.226992775981252	-4.24015969115705	2.23360826710431e-05	8.41055e-05
DTX3L	884.148920421684	-0.915897	0.109520238221399	-8.36281200116695	6.12407602649577e-17	2.11628e-15
DTX4	1508.46795069107	0.624926	0.125955902197212	4.96146906946081	6.99620122847017e-07	3.57233e-06
DUSP10	191.034629296189	-0.897187	0.133846137154345	-6.70312162606691	2.04013515378042e-11	2.47124e-10
DUSP26	819.38854202805	0.995245	0.131466679084554	7.57032312796139	3.72297009453326e-14	7.50369e-13
DUSP6	908.964635471426	-0.957573	0.155343797755169	-6.1642181342579	7.08322447219942e-10	6.40613e-09
DUSP8	560.300855741536	0.692565	0.120252458792859	5.75925827225431	8.4484350868391e-09	6.23712e-08
DUSP9	63.039629720627	1.20408	0.198755659870552	6.05807441598388	1.37760666555867e-09	1.18698e-08
DYNLRB2	32.2658836274006	-1.87655	0.222894105451705	-8.41903158308221	3.79609067765808e-17	1.35505e-15
DYNLT3	381.791922458835	-0.854358	0.146141078148276	-5.84611633750765	5.03182198959966e-09	3.88705e-08
DYRK3	95.1580628198126	-1.10297	0.106563272083133	-10.3503419155588	4.16993922409763e-25	7.38837e-23
E2F7	60.6610556075098	-1.86614	0.265112763382118	-7.03904760753475	1.93558234702799e-12	2.81107e-11
E2F8	25.5132255590699	-1.28071	0.251722332848087	-5.08777367879224	3.62291350403822e-07	1.95543e-06
EBF2	0.988227197871216	-2.0775	0.413454775330301	-5.02473893581135	5.04117817398111e-07	2.64404e-06
EBF4	1042.50132180677	0.734312	0.0909970388620731	8.06962513806443	7.05143286557358e-16	1.90086e-14
ECE1	2416.04977645721	-0.824288	0.101940194442987	-8.0859937841556	6.16593313937285e-16	1.67141e-14
ECHDC2	246.803357833413	-0.903311	0.173165195976511	-5.21646989946864	1.82365194339165e-07	1.04398e-06
ECM2	692.028921906122	-1.85523	0.164538917809444	-11.2753555558341	1.73675550163701e-29	7.35856e-27
ECSCR	44.0097384470223	-0.909694	0.177345244965094	-5.12951160361663	2.90494865627778e-07	1.59621e-06
ECT2	289.671984982626	-0.755886	0.148054823131437	-5.10544584743132	3.30015488296962e-07	1.79214e-06
EDA2R	107.588772793733	-1.07871	0.247000090815616	-4.36723009979838	1.25832143641929e-05	4.9766e-05
EEF1DP3	1.85014134459295	1.31428	0.221070859254091	5.94506118095921	2.76353618441958e-09	2.24329e-08
EEPD1	1656.80571464713	0.796449	0.143438146619097	5.55256288121091	2.81511400155111e-08	1.87835e-07
EFCAB1	39.8478305942876	-1.72358	0.313471531344136	-5.49837302322636	3.83311403995639e-08	2.49858e-07
EFCAB10	17.7681818802493	-2.70243	0.242495454703708	-11.1442330831413	7.63996295432634e-29	2.91966e-26
EFCAB4B	10.4101321759355	-0.719233	0.141446622207519	-5.08483675526876	3.67942394795527e-07	1.98373e-06
EFCAB5	12.2677900426525	0.980166	0.154011081557032	6.36425786656446	1.96236219578143e-10	1.99616e-09
EFEMP1	4609.10531893197	-1.26387	0.16993358386221	-7.43744337055727	1.0265256506174e-13	1.86981e-12
EFEMP2	759.869419484918	-1.41356	0.179259416274203	-7.8855378320642	3.13183687192567e-15	7.45293e-14
EFHC2	61.5559709455595	-2.29003	0.228811876073158	-10.008340859505	1.40082021845814e-23	1.89597e-21
EFNA2	13.6532057984856	0.735889	0.165075779811163	4.45788568317533	8.27720213304762e-06	3.38274e-05
EFNA3	288.49839760229	0.618065	0.124454724797916	4.96618610737178	6.8282430363343e-07	3.49481e-06
EFNB2	533.518292764243	-0.802258	0.133027744923351	-6.03075657136638	1.63193852380796e-09	1.38229e-08
EFS	1854.54875666645	0.598212	0.0904241872106292	6.61561438750513	3.70011739501631e-11	4.2697e-10
EGF	72.706349967667	-0.737189	0.16755168630896	-4.39976876257234	1.08366289513441e-05	4.33777e-05
EGFLAM	70.5325957083234	-1.23135	0.1995337587455	-6.17113843712858	6.78000244327706e-10	6.15761e-09
EGFR	6605.97820350393	-1.58668	0.256556646439855	-6.18452792378926	6.22885872730647e-10	5.69421e-09
EHD2	1161.90297749901	-0.781752	0.125858603795436	-6.21135150574938	5.25308178577688e-10	4.85686e-09
EHD4	443.958539787312	-0.620866	0.122208822091931	-5.0803715022552	3.76697468195278e-07	2.02813e-06
EID3	21.4031786660706	-1.27091	0.197074132685285	-6.44890014823372	1.12664757137765e-10	1.1986e-09
ELAVL2	230.488155191319	1.00582	0.195473811788211	5.14555779617705	2.6672706317157e-07	1.47895e-06
ELF3	11.2551423389203	-0.772377	0.163573418117383	-4.72189912807701	2.33652565654291e-06	1.07075e-05
ELF4	132.707343892224	-0.880876	0.119264413738049	-7.38591215333973	1.51411740957371e-13	2.66819e-12
ELF5	1.52363593423088	-2.41402	0.526788472594163	-4.58252938099691	4.59385137946453e-06	1.97647e-05
ELFN2	1664.06789623989	1.47493	0.161038459056369	9.15887722064047	5.24400676305322e-20	3.25543e-18
ELK3	256.778591495167	-0.627045	0.129413462734385	-4.84528227457132	1.26431793722865e-06	6.13585e-06
ELL3	40.5508690192488	-0.82026	0.100110205756985	-8.19356667175724	2.535968795788e-16	7.51155e-15
ELN	1771.29599061699	-0.759005	0.154190276411284	-4.92252130732696	8.54362588952207e-07	4.28942e-06
EMB	186.975601021905	-1.05303	0.146380690222249	-7.19380069105696	6.30121595982802e-13	1.005e-11
EMILIN1	837.422160473407	-0.923819	0.144649904884379	-6.38658655154214	1.69629443414497e-10	1.7511e-09
EMILIN2	197.549143776371	-1.26153	0.222086685466713	-5.68033193129412	1.34433593391637e-08	9.55199e-08
EMILIN3	494.923565227872	-1.52438	0.296759186287396	-5.13675737662508	2.79519447289401e-07	1.54155e-06
EML5	89.2553451841468	0.661908	0.0777673881922286	8.51137781888655	1.71878583015127e-17	6.58136e-16
EMP2	383.212832297829	-0.808273	0.148564781391445	-5.44054064271821	5.31191192627641e-08	3.38884e-07
EMP3	558.580592619993	-2.19233	0.264060508956076	-8.30237459860016	1.02050842458892e-16	3.39855e-15
EMR1	39.7474678067711	-2.40816	0.31843879847239	-7.56238693362563	3.95739075414885e-14	7.91884e-13
EMR2	122.80631631497	-1.1384	0.190294800098458	-5.98232317634801	2.19977261360775e-09	1.8136e-08
EMR3	0.674823033156465	-2.28022	0.509414351449467	-4.47616088628496	7.59972245241635e-06	3.13545e-05
EN1	50.7059552291245	-2.19939	0.471805827155008	-4.66163351433179	3.13709451322563e-06	1.39977e-05
ENG	1502.71040206916	-0.695171	0.103393907811668	-6.72351528039036	1.77391871028529e-11	2.16899e-10
ENPEP	105.083171957229	-0.958227	0.205212374398787	-4.66944173206746	3.02019344121627e-06	1.35194e-05
ENPP1	64.8011905670113	-1.67356	0.169043107323635	-9.90020493847485	4.15422882261574e-23	5.07113e-21
ENTPD2	308.761752641513	-1.47401	0.23009305431052	-6.40616141466847	1.49228975848831e-10	1.55783e-09
EOMES	3.54971381497788	-2.68205	0.350045586823437	-7.66199524775527	1.83066415623371e-14	3.89941e-13
EPDR1	1000.68425422961	-0.634869	0.102121508194738	-6.21680380845804	5.07383498368035e-10	4.70955e-09
EPHA1	2.68467224374731	-2.31237	0.325319616284515	-7.10798486631079	1.17749467268126e-12	1.77627e-11
EPHA10	91.9544258225775	1.08893	0.183478928058699	5.93488516796147	2.94051234300283e-09	2.37902e-08
EPHB1	1592.47782552127	0.857854	0.155729907292542	5.50860127221491	3.61696134801542e-08	2.36797e-07
EPHB2	522.119279499792	-0.687639	0.127352415283598	-5.39950014675989	6.68268294526175e-08	4.18124e-07
EPHX3	9.83061883683396	-1.709	0.219894384886278	-7.7719202413501	7.73051231031462e-15	1.73181e-13
EPR1	170.435438575091	-1.24071	0.255166996530061	-4.86234957078894	1.1600052892119e-06	5.66913e-06
EPS8L1	9.57998930289237	-0.88433	0.149353159234571	-5.92106453472377	3.19864300643709e-09	2.56867e-08
EPS8L2	170.243209735831	-0.938374	0.174310400634063	-5.38335152569197	7.31115573443838e-08	4.53804e-07
EPSTI1	108.508014268805	-1.36689	0.185770994465529	-7.35793057794199	1.86783133345375e-13	3.23591e-12
EPX	3.84384754778315	0.876956	0.142218261267857	6.16626534341596	6.99217157091036e-10	6.32671e-09
ERBB2	937.445379184382	-0.90009	0.118790255898457	-7.57713977953398	3.53256128658179e-14	7.17184e-13
ERC2	235.941067918156	0.695785	0.14852839906811	4.68452657171817	2.80607764448627e-06	1.26335e-05
ERCC6L	23.8730192437219	-1.00111	0.20300715583135	-4.93139809718087	8.16431553453991e-07	4.11382e-06
ERI1	335.53413227838	-0.588567	0.0755215395817134	-7.79337164258368	6.52443564079483e-15	1.47007e-13
ERMAP	389.425566655074	-0.647128	0.0742297870424463	-8.71789735391983	2.83415713516304e-18	1.2846e-16
ERP27	12.2639892225685	-2.15267	0.222115280540036	-9.69169171317461	3.27065649838761e-22	3.26898e-20
ESCO2	61.5907316073197	-1.2411	0.245338928161067	-5.05871042593368	4.22101285264159e-07	2.24421e-06
ESM1	40.359982726741	-2.85479	0.351787738680219	-8.11510636472874	4.85359506456592e-16	1.33989e-14
ESPNL	14.8118187001694	-1.72672	0.321777504779111	-5.36620077221192	8.04124291143657e-08	4.95022e-07
ESRRB	10.644124332001	-0.984873	0.163440144501293	-6.02589125156171	1.68180241908101e-09	1.41898e-08
ESX1	5.04487764456657	3.23827	0.54105535469929	5.98509798052832	2.16259637961543e-09	1.78597e-08
ETV1	6061.30567792136	0.635246	0.14580775398778	4.35673633523585	1.32016136552419e-05	5.20533e-05
ETV6	595.960757094941	-0.608718	0.0802607459503196	-7.58425949908498	3.34391306201079e-14	6.82438e-13
ETV7	23.1715544270834	-1.56602	0.258593687226958	-6.05590601976052	1.39629508503977e-09	1.20096e-08
EVC	185.813689823286	-1.45229	0.192670646009798	-7.53767679883338	4.78417780975793e-14	9.38065e-13
EVC2	38.631047681522	-2.16498	0.252458830935179	-8.57556353373591	9.86028037252771e-18	3.95426e-16
EVI2B	492.47696517497	-0.931295	0.136325287704839	-6.831414315886	8.40815070427681e-12	1.10205e-10
EXO1	72.4903624479247	-1.5307	0.26147144207142	-5.8541928384429	4.7933220260118e-09	3.72838e-08
EXOC3L2	6.41026555881808	-2.06674	0.286645221145967	-7.21010377525676	5.59092516958085e-13	8.98328e-12
EYA2	297.862695808146	-1.08021	0.2020871436373	-5.34528733350564	9.02737332423445e-08	5.48966e-07
EYA4	109.396495766447	-2.78372	0.317071263567934	-8.77949063872951	1.64216658615041e-18	7.7924e-17
EYS	15.4247895771803	1.32339	0.152600591629178	8.67225281677061	4.23653730029088e-18	1.84933e-16
F11R	403.25578948828	-1.15244	0.123791756731008	-9.30948705165819	1.28451185302206e-20	9.17038e-19
F13A1	309.558279054999	-1.6167	0.250201678713034	-6.46158090783996	1.03614730730904e-10	1.11015e-09
F2RL2	49.6147141962236	-3.08375	0.301774503391255	-10.2187178410516	1.63488949875603e-24	2.48937e-22
F3	2198.38861449385	-1.05715	0.194292398995481	-5.44100304645405	5.29814080647459e-08	3.38338e-07
FABP5	94.2467963819509	-2.39688	0.261700654468299	-9.15886150176288	5.24477058056757e-20	3.25543e-18
FABP7	2086.591436739	-1.24926	0.21356318962516	-5.84962170296409	4.92692275445185e-09	3.8166e-08
FAH	314.89605341763	-0.627689	0.102544756457632	-6.12112014161321	9.29198079254457e-10	8.23934e-09
FAHD2B	170.316375353163	-1.04994	0.179671617681523	-5.84365761780989	5.10669336998435e-09	3.9402e-08
FAIM2	7223.95430469663	0.678192	0.127400528539192	5.32330521322999	1.01898558773785e-07	6.13722e-07
FAM101A	76.7380773892169	0.699823	0.146400867707177	4.78018186220678	1.75136695506874e-06	8.26092e-06
FAM106A	8.50461597134131	0.932982	0.198221282491936	4.70677169346239	2.51670493536956e-06	1.14765e-05
FAM106C	15.2360518064609	0.980689	0.162446998231222	6.03697895366007	1.57026193913975e-09	1.33353e-08
FAM109B	70.0709814420827	-0.968303	0.118823631781193	-8.14908091178191	3.66700545636344e-16	1.04336e-14
FAM110A	171.013431693364	0.695961	0.127451203469583	5.46061091637914	4.74498930913425e-08	3.05113e-07
FAM110B	1659.23712191936	1.10867	0.119743024851085	9.25877872600081	2.06783773381379e-20	1.41411e-18
FAM110C	4.60055347137142	-1.59923	0.327924863397539	-4.87683115372458	1.07803636385382e-06	5.30311e-06
FAM111A	556.421079297052	-0.635442	0.0930881779636159	-6.82623239043421	8.71736771194693e-12	1.13799e-10
FAM111B	81.0979926895304	-1.13355	0.241376290740449	-4.69619748459043	2.65049297647991e-06	1.20107e-05
FAM113B	107.792751431891	-0.879285	0.116332191346267	-7.55839425066441	4.08075578923438e-14	8.1323e-13
FAM114A1	147.673827212962	-1.48561	0.144158011411722	-10.305410143046	6.66069466729947e-25	1.12763e-22
FAM115C	131.952631500698	-1.25514	0.174888789472275	-7.1767764073009	7.13742713165492e-13	1.12721e-11
FAM119B	243.243381277115	-1.26327	0.158212812932744	-7.98459673290368	1.40982430300909e-15	3.59653e-14
FAM123C	133.545763714434	1.24353	0.253943322117535	4.89688699439413	9.7366793034105e-07	4.82256e-06
FAM126A	555.652426750623	-0.917577	0.116975649153982	-7.84417015317978	4.35825837655268e-15	1.01242e-13
FAM129A	456.018067702904	-1.51475	0.17582345908207	-8.61516611129386	6.98402638880711e-18	2.91741e-16
FAM133A	131.177675152208	0.894439	0.167584707939558	5.33723429670301	9.43750550209408e-08	5.71943e-07
FAM134B	866.378330342112	-0.60703	0.106962553049063	-5.67516497817724	1.38555057489061e-08	9.80907e-08
FAM13AOS	60.2035505200318	0.642296	0.123979553176373	5.18065804277775	2.21104501780394e-07	1.24547e-06
FAM13C	465.078789168103	0.639785	0.115163480774934	5.55544689199769	2.76902397630156e-08	1.85013e-07
FAM150B	9.98496933703261	-1.00137	0.231900005253672	-4.31809873531261	1.57379028857843e-05	6.10533e-05
FAM153A	9.29907256730332	1.47741	0.346091924737108	4.26883620306772	1.96495489746103e-05	7.4755e-05
FAM153B	3.65559210057664	2.12961	0.494337777485302	4.30800936614889	1.64730411185278e-05	6.36392e-05
FAM155A	439.194712056606	0.919217	0.151130194095508	6.08228267349694	1.18483437660364e-09	1.03229e-08
FAM159A	13.1288319650369	-1.19175	0.173633603832788	-6.8635955728267	6.71485633733729e-12	8.92719e-11
FAM163B	64.9621161424386	1.43828	0.268253712838791	5.36164379199457	8.24680383757814e-08	5.056e-07
FAM164C	50.0156837284959	-1.25892	0.141455067819973	-8.89975606328191	5.59695603109272e-19	2.90892e-17
FAM166B	14.3950103361323	-0.833688	0.193558487874552	-4.30716385160942	1.65361119634562e-05	6.38702e-05
FAM171A2	450.685873593573	0.694905	0.105182532619093	6.60666070767892	3.93085521496424e-11	4.52524e-10
FAM176B	94.6875703338694	-0.689764	0.13856646364755	-4.97785387418262	6.42931640446501e-07	3.30365e-06
FAM177B	10.2933789954751	-1.68714	0.245875536428535	-6.86177667072017	6.80093304046544e-12	9.02316e-11
FAM178B	40.8375569764802	-1.02541	0.209470117547487	-4.89523711367405	9.81872678141135e-07	4.86197e-06
FAM180B	18.9235937016371	-1.76922	0.266822429815373	-6.63068804693364	3.34125706926498e-11	3.88551e-10
FAM181A	246.654647794037	-1.4384	0.22616704033956	-6.35988555541056	2.01904123881932e-10	2.04634e-09
FAM182B	521.217618996004	0.6393	0.142516179525821	4.48580400634495	7.26394922977062e-06	3.0103e-05
FAM183A	14.6919081656876	-6.08727	0.563536931476507	-10.8018931104093	3.37178841355668e-27	9.38802e-25
FAM188B	192.515000956226	-0.900878	0.14269464966596	-6.31332723474393	2.73099173444725e-10	2.69095e-09
FAM198A	340.069225117378	-0.673723	0.149783132005125	-4.49798839822263	6.85994398499355e-06	2.85501e-05
FAM198B	1787.71492920134	-0.750691	0.146186214751603	-5.13516740865106	2.81892983471483e-07	1.55288e-06
FAM19A1	52.0397552020112	1.23216	0.291563231610085	4.22603187786604	2.37848311935315e-05	8.90789e-05
FAM19A2	143.274842034268	1.05646	0.203223073288355	5.19850905394669	2.00893341606321e-07	1.14085e-06
FAM20A	67.6203797851425	-1.68736	0.203371948999104	-8.29691340494174	1.06851205297182e-16	3.54172e-15
FAM20C	1613.98913598697	-0.868123	0.13345478507456	-6.50499418449998	7.76963857449094e-11	8.50254e-10
FAM23A	10.7970358145338	1.20111	0.217345501206242	5.52628000763816	3.27091951076523e-08	2.15503e-07
FAM26F	60.8993606254823	-1.50654	0.184362881358279	-8.17159202650909	3.04346217708281e-16	8.86653e-15
FAM3B	7.43385736554997	-1.38291	0.316829390344149	-4.36484452305771	1.2721320639683e-05	5.02658e-05
FAM3D	0.668811946046994	-1.95696	0.417149639909943	-4.69126031227115	2.71527238880325e-06	1.22729e-05
FAM46A	333.533936399883	-0.867189	0.139341451055366	-6.22348369008586	4.86235385128293e-10	4.55393e-09
FAM46B	43.780465513681	-1.88611	0.235780762075342	-7.99941139512736	1.2501537223752e-15	3.23132e-14
FAM50B	169.670213385844	-0.809959	0.161817798079147	-5.00537444965278	5.57535427639933e-07	2.89847e-06
FAM54A	16.8133184046004	-0.987254	0.183102728028564	-5.39180381965162	6.97538986341555e-08	4.35041e-07
FAM57B	558.53578002742	1.03288	0.146145400862775	7.06748731309005	1.57764164476392e-12	2.32062e-11
FAM64A	196.183422091204	-1.07787	0.25346737812797	-4.25250804272253	2.11389622149225e-05	7.98756e-05
FAM65C	77.0024242452888	-1.5027	0.200187479038237	-7.50645128359914	6.0751730812926e-14	1.16707e-12
FAM70A	1106.20634512099	-0.774616	0.123765134575038	-6.25875430538059	3.88064686470355e-10	3.71482e-09
FAM70B	31.8601112671733	-0.920489	0.133780969567742	-6.88056899719731	5.96139630839323e-12	7.97992e-11
FAM72A	11.803746572077	-0.699698	0.141060894902659	-4.96025816129457	7.0399556409458e-07	3.59185e-06
FAM72B	76.0111620067294	-0.637234	0.125621323818559	-5.07265522598006	3.92302892877945e-07	2.10228e-06
FAM72D	30.8764989578246	-0.613103	0.139268365391528	-4.40231551310882	1.07101651050652e-05	4.29244e-05
FAM78B	51.6589478631287	-1.06558	0.16496331137977	-6.45952660805862	1.05031018595718e-10	1.12414e-09
FAM81B	30.8716522772883	-5.09159	0.464555592984085	-10.9601252374102	5.94170872736725e-28	1.89842e-25
FAM83D	71.1095260447066	-0.917957	0.209291765729603	-4.38601616702763	1.15445544527945e-05	4.59847e-05
FAM84B	2293.54037084669	0.97095	0.132213348489617	7.3438147334019	2.07590425969617e-13	3.55531e-12
FAM86C	88.2683393182214	-0.596836	0.0890922970550551	-6.69907116854254	2.09748430616134e-11	2.53598e-10
FAM92B	2.21823258280756	-4.37054	0.81491338277976	-5.36319213091171	8.17639550215404e-08	5.01915e-07
FANCB	9.82219819389766	-0.760531	0.162176075910148	-4.6895415763217	2.73817796512698e-06	1.23649e-05
FANCI	426.696560743786	-0.874635	0.184737723266277	-4.73447037056817	2.19627851319766e-06	1.01123e-05
FANK1	50.0742454287441	-0.845757	0.155664669389291	-5.43319851431313	5.53527685946401e-08	3.51753e-07
FAP	53.9395845536	-1.02231	0.208966644298831	-4.89221136401154	9.9709280031424e-07	4.93357e-06
FAR2	113.804640814001	-0.850112	0.129484365141164	-6.56536111924686	5.19069123007768e-11	5.83766e-10
FAS	167.709551228082	-0.80988	0.172453235846495	-4.69622709318706	2.65010900087532e-06	1.20107e-05
FASLG	1.71613928086355	-2.89558	0.394678978321987	-7.33655561339632	2.19160770065223e-13	3.73378e-12
FBLIM1	190.78249084192	-0.916758	0.185683934711153	-4.93719849967719	7.92527945765735e-07	4.0058e-06
FBLL1	255.175831607179	0.869448	0.145824840966445	5.96227553320866	2.48749232253248e-09	2.03361e-08
FBLN1	615.176708103964	-0.8234	0.178290288278639	-4.61831253675038	3.868732619424e-06	1.69252e-05
FBLN5	581.663414690399	-1.33731	0.193154928575392	-6.92351098186919	4.40584973005373e-12	6.01752e-11
FBLN7	104.669864130338	-1.49397	0.264600497294198	-5.64613109983453	1.64098729351813e-08	1.14102e-07
FBP1	103.167718326324	-1.12658	0.140494774590903	-8.01864926778345	1.06914304683214e-15	2.80452e-14
FBXL13	10.0965002066503	-1.37642	0.161374659813363	-8.52932729323946	1.47201177743046e-17	5.7494e-16
FBXL16	2696.13773035167	0.977874	0.168982590238136	5.78683511216039	7.17249202829285e-09	5.37661e-08
FBXO17	207.703286051552	-1.47482	0.222236792559876	-6.63626522481105	3.21730720597868e-11	3.75256e-10
FBXO32	737.549158184588	-0.674104	0.151062805030372	-4.46240937001233	8.10432093049238e-06	3.31695e-05
FBXO41	751.534907567604	0.791111	0.14926763309298	5.29995197608009	1.15833144800225e-07	6.88919e-07
FBXO43	11.519450035297	-0.986241	0.172072590582798	-5.73154235307532	9.95214911182781e-09	7.25654e-08
FBXW12	1.19840538799466	1.21167	0.256788076880042	4.7185729303959	2.37504824350264e-06	1.08738e-05
FCER1G	638.029702688066	-1.03699	0.127283832498862	-8.14709082480856	3.72783694806162e-16	1.05298e-14
FCGBP	4479.4105303342	-1.39419	0.220024808636996	-6.33651432300242	2.35021343109129e-10	2.35021e-09
FCGR1A	451.132951170707	-0.696995	0.147042261616039	-4.74009720829512	2.13615708967646e-06	9.85646e-06
FCGR1C	167.118539040817	-0.658002	0.152031542264116	-4.32806400568354	1.50425759024796e-05	5.86242e-05
FCGR2A	862.201108083946	-1.17501	0.136342772912925	-8.61807895474019	6.80867287577046e-18	2.86611e-16
FCGR2B	51.7533217846388	-2.50017	0.271851318942105	-9.1968124869351	3.68725133859476e-20	2.37962e-18
FCGR2C	32.2266887861784	-2.47139	0.226206723450244	-10.9253391220694	8.72140039915537e-28	2.65594e-25
FCGR3A	2306.11898479673	-1.66776	0.181532337408259	-9.18712113117817	4.03495294021906e-20	2.56997e-18
FCGR3B	23.8883385156004	-1.4356	0.236763226802491	-6.06343319640893	1.33246140489026e-09	1.15114e-08
FCHSD1	181.050043447894	-0.632754	0.125210600495465	-5.05351402930011	4.33754438922932e-07	2.30037e-06
FCHSD2	2731.2335640192	0.751757	0.0812704920515519	9.25006315448477	2.24360067831977e-20	1.51833e-18
FCRL6	3.57075495615598	-1.41986	0.255470785659088	-5.55779879068471	2.73198056399591e-08	1.82977e-07
FER1L4	7.70152755104715	-1.50074	0.23821590742307	-6.29990153302287	2.97834787836933e-10	2.90967e-09
FERMT1	1413.46947977763	1.22689	0.203842285258331	6.01884370428521	1.75667382877508e-09	1.47512e-08
FERMT3	473.403069021936	-0.732388	0.127310562266606	-5.75276641222447	8.77947566288619e-09	6.46193e-08
FES	220.296765369338	-0.671842	0.109860479118722	-6.1154129402974	9.63072492671479e-10	8.51646e-09
FGF1	4845.50445213292	-0.920886	0.1472969334484	-6.25190320773454	4.0548068094665e-10	3.87203e-09
FGF12	546.681224855068	1.06616	0.129360820448874	8.24174347349971	1.69719144473898e-16	5.2422e-15
FGF14	283.779710340508	0.665406	0.144194361540755	4.61464497145589	3.93767841194156e-06	1.71882e-05
FGF17	91.3257850482226	1.20239	0.262496614191687	4.58057346765565	4.63702686766798e-06	1.99373e-05
FGF20	8.64873393624892	-0.75741	0.158162647454216	-4.78880206133462	1.67779870834471e-06	7.94854e-06
FGF9	68.1309828687637	0.934511	0.191837457702626	4.87136711024074	1.10828694575502e-06	5.43956e-06
FGFBP2	44.386751949372	-1.43704	0.276509951831023	-5.19705541002078	2.02470027150422e-07	1.1488e-06
FGFR1	1785.15241476288	-0.637813	0.114114500133006	-5.58923573996691	2.28071157450899e-08	1.54559e-07
FGFRL1	765.673147070302	-0.976997	0.163084439080006	-5.99074558326199	2.08881190542383e-09	1.73168e-08
FGL2	492.093504055155	-1.23642	0.151641479852838	-8.15354735413037	3.5340178841425e-16	1.00846e-14
FGR	185.576384251081	-0.597093	0.126525634875106	-4.71914842765701	2.36833974178685e-06	1.08456e-05
FHAD1	31.4880577671229	-2.62782	0.23276149107003	-11.2897647154433	1.47430797518555e-29	6.38539e-27
FHDC1	286.512827633068	0.979918	0.166378613403013	5.8896877449442	3.8692600942828e-09	3.07427e-08
FHL3	487.61906118911	-0.626334	0.096565722199767	-6.48609113478938	8.80918931879228e-11	9.56496e-10
FILIP1L	422.360427598881	-1.38403	0.168582570313849	-8.20980345829178	2.21550848297405e-16	6.69461e-15
FKBP10	2023.50862073955	-1.0067	0.127522999674194	-7.89427350696743	2.92011166112896e-15	6.99177e-14
FKBP5	2055.41503804033	-0.933315	0.196639400139244	-4.74632692299714	2.07143813272695e-06	9.59191e-06
FKBP9	1403.01749879509	-1.15886	0.133421099353037	-8.68570280698346	3.7640783189153e-18	1.66353e-16
FKBP9L	35.086021396345	-1.21066	0.193865261635721	-6.24487136081821	4.24149046774398e-10	4.03055e-09
FLJ10661	8.20048317211709	-0.876871	0.174636107901127	-5.02113343901311	5.13674569464695e-07	2.68838e-06
FLJ11235	20.5016158426566	-0.700851	0.134087763188573	-5.22680684293556	1.72462501505392e-07	9.9329e-07
FLJ16779	4569.37613189535	0.776006	0.178617440835194	4.3445156052986	1.39583321249687e-05	5.48152e-05
FLJ26850	14.928649907555	-1.57655	0.191259716799835	-8.24297094818925	1.67986373216359e-16	5.19691e-15
FLJ35776	84.2401998608388	-0.712973	0.115695556597951	-6.16249233262577	7.16087993955584e-10	6.46736e-09
FLJ36777	6.72991585201243	-1.1056	0.180141050842417	-6.1374256455223	8.38694522205186e-10	7.4845e-09
FLJ42627	67.7694898313842	0.653161	0.0971134541459066	6.72574768988378	1.74693047502823e-11	2.14002e-10
FLJ44606	26.8669362224111	-0.802098	0.170892832376438	-4.69357131529337	2.68476336699211e-06	1.21491e-05
FLJ45244	136.582209583622	0.601007	0.126665959756187	4.74481789568029	2.08693995810505e-06	9.64993e-06
FLNA	9478.40048901069	-0.712987	0.112319066617083	-6.3478728904653	2.18312338757291e-10	2.19892e-09
FLNC	2122.6649860649	-2.18723	0.20983930868705	-10.4233492891248	1.93998633757689e-25	3.60098e-23
FLRT1	512.689980632736	0.872546	0.117251058409892	7.44168713761966	9.94074321998263e-14	1.8192e-12
FMO4	57.1742696221636	-0.770241	0.100579713256458	-7.65801782565962	1.88824683405226e-14	4.00892e-13
FMOD	554.390921009441	-3.39753	0.285792640101506	-11.8880780988756	1.36511723438177e-32	8.31442e-30
FN1	9243.83081767897	-1.06739	0.15671950635859	-6.81084802550143	9.70250872629824e-12	1.25399e-10
FNDC1	38.8105927783758	-1.95416	0.313668650518254	-6.23000905545459	4.66408214523194e-10	4.39145e-09
FNDC3B	510.848642319185	-0.792349	0.0987692951774081	-8.02222405362398	1.03847498085918e-15	2.73143e-14
FNDC7	9.46307207671234	-1.56737	0.264115331210254	-5.93441399171064	2.94896870395631e-09	2.38289e-08
FOLR1	51.4084335603883	-1.85282	0.243640802980957	-7.60470313394345	2.85558616450326e-14	5.87702e-13
FOSL1	65.8418149376713	-1.05798	0.217889589980896	-4.85555859589892	1.20047847868952e-06	5.85079e-06
FOXC1	186.085511591687	-0.60679	0.126277078249903	-4.80522646177407	1.54576440719197e-06	7.3678e-06
FOXD4	17.690410614534	0.735953	0.130951972989981	5.62002394196636	1.90930998009525e-08	1.3103e-07
FOXD4L2	8.98007300912632	1.0424	0.16328201567	6.38407072283954	1.72441388159597e-10	1.77633e-09
FOXJ1	636.885310784561	-2.69059	0.215555149109786	-12.4821442213702	9.34360541915449e-36	1.07122e-32
FOXL1	10.7809195483176	-0.762973	0.162588426820226	-4.69266330709799	2.69671111733241e-06	1.21975e-05
FOXM1	615.347935273608	-1.30642	0.226768182524684	-5.76104333747785	8.35955704943437e-09	6.18556e-08
FPGT	257.517685347271	-0.63209	0.0674360558080429	-9.37318059692339	7.03790620669647e-21	5.29609e-19
FPR1	549.93212868885	-0.947862	0.184819885277999	-5.12856975326413	2.91951723714821e-07	1.6024e-06
FPR2	9.50190484240799	-1.59093	0.299398119486233	-5.31377087232461	1.07379622608316e-07	6.42761e-07
FPR3	134.477073475304	-1.50132	0.21176187204908	-7.08965644483515	1.34445339510986e-12	2.01101e-11
FRMD4B	357.457693928976	-0.636571	0.13019426892997	-4.88939227837472	1.01147754370134e-06	4.9984e-06
FRMPD1	80.8963990382907	0.870712	0.134850030469694	6.45689264999059	1.06874651684165e-10	1.14136e-09
FRRS1	9.56163673735312	-1.75341	0.224268610133011	-7.8183522984752	5.35192330782781e-15	1.22572e-13
FRY	1703.84238379549	0.815967	0.0932955672490598	8.74604362556836	2.20963710656358e-18	1.02538e-16
FRZB	337.408023228922	-0.879041	0.169907224426857	-5.17365012884843	2.29564507607866e-07	1.28866e-06
FSD1	636.714409932263	0.748758	0.115443007375694	6.4859571758924	8.81702092609718e-11	9.5666e-10
FSIP1	24.7758154423369	-1.27385	0.149398592313639	-8.52649875508039	1.50843799911534e-17	5.87989e-16
FSTL1	2454.80108417288	-1.85367	0.124589455975293	-14.8782305542048	4.56411396564361e-50	4.44773e-46
FTL	35455.3203843083	-0.902482	0.104756301681346	-8.61506134427388	6.99041573427196e-18	2.91741e-16
FUCA1	402.815771291035	-0.667062	0.0870166685463181	-7.66591228403854	1.77564515984896e-14	3.78636e-13
FUCA2	651.339345811899	-0.972152	0.103072982826833	-9.4316825956293	4.035624449027e-21	3.1212e-19
FUT3	14.3384814654734	1.60804	0.245668977824026	6.54556151014416	5.92722556444370e-11	6.59747e-10
FUT5	6.71135869362255	1.19629	0.220318676959227	5.42983445705538	5.64063494918244e-08	3.57748e-07
FUT6	2.28539367156559	1.42676	0.269381788298947	5.29642561915692	1.18091408557152e-07	7.00853e-07
FUT9	1269.26988731667	0.70997	0.138042624904641	5.14312507761495	2.70205595487967e-07	1.49654e-06
FXYD1	429.672351179251	-1.2098	0.264576704256293	-4.57258434794743	4.81745193943517e-06	2.06492e-05
FXYD2	9.23546855611867	1.18307	0.190209049791054	6.21981551875053	4.97739755431863e-10	4.63716e-09
FXYD3	24.2816895142185	-1.2765	0.221901951964174	-5.75253481926829	8.79151532113859e-09	6.46835e-08
FXYD5	521.79209724616	-0.956846	0.128787719403123	-7.42963938453295	1.08894145143922e-13	1.97611e-12
FXYD6	18110.0384085169	0.748368	0.111889860094432	6.68843801102936	2.25565154777023e-11	2.71207e-10
FYB	721.100252727381	-0.989016	0.141752406930091	-6.97706485269681	3.01410597267655e-12	4.24151e-11
FZD1	398.464872086897	-0.840294	0.105383007470468	-7.97371375675769	1.53975936683999e-15	3.89234e-14
FZD2	98.2025291823021	-0.811109	0.126482371980764	-6.41281957799925	1.42852548409693e-10	1.49688e-09
FZD3	331.04850335201	-0.602585	0.100321529222714	-6.00653893965228	1.89525473645443e-09	1.58195e-08
FZD6	163.079763718027	-1.25429	0.165783885672254	-7.56582854748333	3.85400106449302e-14	7.72783e-13
FZD7	548.826521569731	-0.645656	0.151431143694855	-4.26369236212526	2.01076239029301e-05	7.63189e-05
G0S2	37.9438232917008	-1.50319	0.327676537480853	-4.58741912060623	4.48759192745547e-06	1.93631e-05
G6PC2	3.1836184172271	1.81849	0.352384901505737	5.16051725180792	2.46268466148161e-07	1.37097e-06
GAB3	159.792707100572	-0.641892	0.106253684741486	-6.04112532114916	1.53043047400978e-09	1.30197e-08
GABBR1	8411.65450768642	1.05224	0.139072244023385	7.56615418935876	3.84435711752641e-14	7.71643e-13
GABRA3	223.57246195458	0.964412	0.189855430018202	5.07971927107441	3.77993015029215e-07	2.03342e-06
GABRA5	224.173588855788	1.30585	0.309982792147396	4.21266288426238	2.52377594527123e-05	9.41225e-05
GABRB3	945.207124662072	1.05934	0.181581614414426	5.8339363023758	5.41347946786928e-09	4.15632e-08
GABRD	396.518917726955	1.02999	0.231956209819875	4.44046258949082	8.97657093915731e-06	3.64107e-05
GAD1	1061.15523216816	1.2959	0.159097675689577	8.14531331903994	3.78301061380055e-16	1.06548e-14
GAL3ST4	849.629011718603	-0.690115	0.0931856237587037	-7.40581379876367	1.30348621457085e-13	2.31797e-12
GALC	975.235462866667	-0.597925	0.116326315975686	-5.14006906006472	2.74637509325912e-07	1.51849e-06
GALM	214.557664697783	-0.762026	0.0892766558294918	-8.53555383480155	1.39485639989347e-17	5.49207e-16
GALNT12	30.349891252402	-1.22209	0.149168380487432	-8.19267141028664	2.55490987517566e-16	7.55618e-15
GALNT13	2445.20688724734	1.03553	0.173261638531839	5.97666983898123	2.27745104091109e-09	1.8721e-08
GALNT14	81.3713590732066	0.965273	0.193912209016801	4.97788582007361	6.42825563083883e-07	3.30365e-06
GALNT3	50.5536231486273	-2.50016	0.230708357997271	-10.8368972598682	2.30144526173606e-27	6.50075e-25
GALNT4	185.929074387293	-0.78754	0.0998212733459809	-7.88950416701375	3.03389502642704e-15	7.24128e-14
GALNT5	18.3502199158492	-4.6287	0.610357556184726	-7.58359155431171	3.36118163085096e-14	6.84529e-13
GALNT9	501.266550461313	1.53151	0.232145692789774	6.59719474595931	4.19010219299853e-11	4.81232e-10
GALNTL6	7.03111584383202	1.48775	0.322329282149813	4.61562995647065	3.91904708759392e-06	1.71222e-05
GALR3	2.21867896471035	1.32202	0.236024356361284	5.60119943547458	2.12873644491241e-08	1.45016e-07
GAP43	4991.53420068504	-0.855384	0.191457391844745	-4.46774945244261	7.9046809352542e-06	3.24752e-05
GAPT	53.7282454965974	-1.78077	0.164890204440536	-10.7997517024949	3.45135621013093e-27	9.47422e-25
GARNL3	328.329051689598	0.609925	0.0960873138125222	6.34761430264668	2.18679494296236e-10	2.20148e-09
GAS2L2	18.767636206263	-2.43221	0.299997135843472	-8.10743077758579	5.1701304557477e-16	1.41525e-14
GAS2L3	31.0430704652811	-1.3333	0.247972056416587	-5.37682344069549	7.58114494212203e-08	4.68919e-07
GATA3	9.26693332748197	-1.26808	0.267276541635541	-4.74445780628181	2.09065549134109e-06	9.66253e-06
GATA4	7.11632832618785	-5.29807	0.673789473005135	-7.86309168518989	3.74766496757742e-15	8.80024e-14
GBA	1112.41325820738	-0.59023	0.0623249675122531	-9.470194341488	2.79323524013004e-21	2.24034e-19
GBA3	2.98966790352083	-2.47972	0.443239071234338	-5.59453582308705	2.212127934234e-08	1.50224e-07
GBGT1	137.686052984041	-0.745598	0.115817279372914	-6.43770915817173	1.2129012374151e-10	1.28545e-09
GBP1	1053.7805814942	-1.89503	0.193696655056984	-9.78348120564782	1.32570623367465e-22	1.43545e-20
GBP2	1531.59122783208	-1.23824	0.204362903744537	-6.0590071318276	1.36964321066478e-09	1.18169e-08
GBP3	626.374421697301	-1.23183	0.176976267826732	-6.96040174405936	3.39303740856242e-12	4.72022e-11
GBP4	372.807658463329	-1.01067	0.145828464547771	-6.93050664071919	4.19336081483416e-12	5.73534e-11
GBP5	85.352650237266	-3.07045	0.229417317071879	-13.3836983737558	7.53050468095109e-41	1.63077e-37
GBP6	9.22491537805421	-1.47435	0.280740180452395	-5.25165776597676	1.5073634251414e-07	8.75664e-07
GCA	408.906032092183	-0.686172	0.0843175637201836	-8.13794443205188	4.02045279438481e-16	1.12101e-14
GCET2	2.66214037976404	-1.44727	0.250066356757636	-5.78753927575626	7.14249906559813e-09	5.35825e-08
GCH1	59.9260386050744	-0.969337	0.14752633897033	-6.5706035974234	5.01117042341162e-11	5.65862e-10
GCK	77.1103168102106	-1.39867	0.192764498309983	-7.25585168711105	3.99142252966205e-13	6.55926e-12
GCLM	240.546508460091	-0.580206	0.0850325627540059	-6.82334181914657	8.89466719153187e-12	1.1588e-10
GCNT1	72.3677430863431	-1.52221	0.169802769757601	-8.96456753326563	3.11500822328035e-19	1.68176e-17
GCOM1	94.2506051992485	-1.58523	0.245488816134112	-6.45742620864966	1.0649865134881e-10	1.13797e-09
GDAP1L1	754.280833369069	1.20415	0.153575524404195	7.84074184468675	4.47892404051432e-15	1.03675e-13
GDF15	70.0165853878106	-2.86515	0.296744230462222	-9.65530071414912	4.66787733545695e-22	4.48162e-20
GDF5	18.4002264378955	-1.71109	0.232853749055858	-7.34834332112321	2.00678511800627e-13	3.4521e-12
GDPD2	293.996152177887	-0.961824	0.173462941903553	-5.54483722868604	2.94227749501426e-08	1.95383e-07
GFI1	6.37832880427197	-1.34942	0.170009684862513	-7.93733015446377	2.06579638825533e-15	5.12244e-14
GFRA1	688.888733367471	0.926912	0.185682910126589	4.99190953975669	5.97852561532235e-07	3.09404e-06
GGH	317.607004521039	-0.803871	0.106711825152243	-7.53310145707702	4.95490814861372e-14	9.68617e-13
GGT8P	8.13036962448035	-3.32681	0.513194891803561	-6.4825564058832	9.0181351980385e-11	9.7755e-10
GIMAP2	171.871343979937	-0.977831	0.10731868656259	-9.11146683408603	8.12755591941881e-20	4.84422e-18
GIMAP4	595.857053693024	-0.717213	0.10924773017712	-6.56501287359081	5.20283671627071e-11	5.84794e-10
GINS1	202.008264866302	-0.639622	0.144417720316312	-4.42897317174885	9.46827987604941e-06	3.82539e-05
GINS2	140.661633045284	-0.73012	0.157634555247526	-4.6317269368317	3.62628224095792e-06	1.59684e-05
GINS4	87.9876671440241	-1.02691	0.125266113892184	-8.19780962636932	2.44806635960212e-16	7.29503e-15
GJB2	77.5173103377235	-1.6102	0.28552604135467	-5.63942806150343	1.70615912454673e-08	1.18212e-07
GJC1	268.643235331337	-0.782067	0.157900458013931	-4.95290862832861	7.31123106633748e-07	3.71567e-06
GJD2	4.2900163323349	1.88047	0.387729799897009	4.84995501526623	1.23489477534496e-06	5.99753e-06
GJD3	26.3598411073505	-1.75839	0.238922085352662	-7.35968152808365	1.84349508458524e-13	3.20229e-12
GK3P	14.6699976848222	-0.598673	0.106684464230749	-5.61161975998064	2.00441494404736e-08	1.37074e-07
GLA	254.146012628935	-0.615127	0.0657853727586057	-9.35050816467162	8.72276203453715e-21	6.29654e-19
GLB1L	161.011767452063	-0.858523	0.0816610896674233	-10.51324551565	7.50649081723551e-26	1.52397e-23
GLDN	659.448959023288	-0.870858	0.178821489359631	-4.86998288099337	1.11607917547695e-06	5.47505e-06
GLIPR1	563.578782699815	-0.960605	0.151910696929359	-6.32348774709926	2.55724490197945e-10	2.53642e-09
GLIS3	952.324459890849	-0.856344	0.13175345348849	-6.4995916368018	8.05383310274942e-11	8.78887e-10
GLP1R	10.2192861317404	1.68615	0.355063440915599	4.74886239221617	2.04564066918934e-06	9.48424e-06
GLRA3	37.0087876579807	1.99462	0.297910612723443	6.69535036651789	2.15155504550836e-11	2.59491e-10
GLRA4	0.894736082826609	1.86719	0.331691729073561	5.62928875975977	1.80954236599359e-08	1.24754e-07
GLRB	510.77103241478	0.63449	0.109746685806831	5.78140782684926	7.40780649993696e-09	5.5313e-08
GLRX	388.510466019545	-0.641427	0.101419684965853	-6.32448198906355	2.54083484790409e-10	2.52529e-09
GLT25D1	1213.30016275219	-0.616621	0.0746728686931744	-8.2576287435515	1.48594891420318e-16	4.6787e-15
GLUD1	10849.7848509756	0.741782	0.103225308523498	7.18604448051819	6.66953238254209e-13	1.06027e-11
GLUD2	1298.57495782957	0.815314	0.120228744048484	6.7813542139743	1.19054577667644e-11	1.51164e-10
GMFG	269.139798507337	-0.669359	0.112106992010088	-5.97071388051511	2.36217688447387e-09	1.93766e-08
GMPR	578.212365924256	-1.37071	0.200852356606473	-6.82446989873421	8.82505753503432e-12	1.1505e-10
GNA14	66.7206282901751	-0.682214	0.158846584520828	-4.29479873408169	1.74851890683474e-05	6.7203e-05
GNAL	248.12788763367	1.03805	0.168864133164902	6.14724395357065	7.88408235019872e-10	7.08603e-09
GNB3	111.412047919425	0.959005	0.177983320346076	5.38817346258327	7.11773391556348e-08	4.4321e-07
GNG12	1602.52549265009	-1.08876	0.13561879410537	-8.02811212084177	9.89840001432193e-16	2.61409e-14
GNG4	1332.33461157473	0.743604	0.124230180191819	5.98569557039351	2.15467046978601e-09	1.78169e-08
GNG5	1209.04642582249	-0.6631	0.0860862193458667	-7.70274253601882	1.33176519883845e-14	2.89366e-13
GNGT2	33.4338286095485	-0.898966	0.131776137409803	-6.82191501645926	8.98348084745477e-12	1.16864e-10
GNLY	40.1757026550873	-2.27167	0.247583755203349	-9.17535361563165	4.50094752490608e-20	2.84816e-18
GNS	2525.96017621202	-0.713008	0.082553185956921	-8.63694896825153	5.77341578706823e-18	2.4515e-16
GOLGA2B	68.1298305248645	-0.785177	0.158969363164486	-4.93917253614759	7.84547731080988e-07	3.96752e-06
GOLGA6B	6.01746540785664	1.13618	0.186393976364634	6.0955698006865	1.09048315993327e-09	9.56492e-09
GOLGA6L10	115.346899188274	0.619028	0.104737795652021	5.9102652806141	3.41557221860255e-09	2.7305e-08
GOLGA6L5	42.6820242233485	0.894868	0.123709274837742	7.23364102461376	4.70213680072617e-13	7.64342e-12
GOLGA8A	1880.25221194294	1.01659	0.147763862553144	6.8798054533667	5.99343543982408e-12	8.0118e-11
GOLGA8B	755.198957487353	0.928983	0.164448614603126	5.64907708984667	1.61311510162772e-08	1.12405e-07
GOLT1A	9.00175764469291	-1.59055	0.369986952759571	-4.29894570029331	1.71612506837515e-05	6.60752e-05
GP1BA	12.6841693804005	0.669317	0.135415288715505	4.9427007298898	7.70477096168499e-07	3.90346e-06
GPA33	1.78565793472847	-1.77592	0.315429785655287	-5.63014575430503	1.80057395594546e-08	1.24224e-07
GPAT2	37.7713585799674	-0.85355	0.189078730721979	-4.51425832322622	6.35387319424652e-06	2.66202e-05
GPC3	37.5609988278832	-1.15866	0.22639067835114	-5.11798837344388	3.08811634226789e-07	1.68707e-06
GPD1	533.727013626757	-1.28665	0.216935360117489	-5.931051153242	3.01001411980534e-09	2.4292e-08
GPLD1	46.1095299257339	0.630284	0.129993382018641	4.84858628899178	1.2434444105396e-06	6.03605e-06
GPNMB	1253.60742587959	-1.88428	0.221137835828558	-8.52082019760904	1.58427325468574e-17	6.12649e-16
GPR1	9.60227122516178	-3.98977	0.514511031551317	-7.7544919479048	8.8697851995726e-15	1.97343e-13
GPR109A	2.07517280857674	-1.82313	0.333853375696055	-5.460859795071	4.73834151912131e-08	3.04786e-07
GPR114	27.86017097874	-0.942335	0.198711981534264	-4.74221317667045	2.11396003737092e-06	9.75635e-06
GPR120	11.0727534924367	-0.892726	0.170643299546041	-5.23153007847296	1.68112673271284e-07	9.6967e-07
GPR123	773.200475647395	0.79625	0.118337707661332	6.72862552128272	1.71273213339561e-11	2.10474e-10
GPR132	71.6445388805903	-0.626707	0.143264709593179	-4.37447013142007	1.21727787974212e-05	4.82897e-05
GPR133	69.3415005520898	-0.818831	0.170348352177494	-4.80680466644189	1.53361698949218e-06	7.32065e-06
GPR141	2.72414219978514	-2.31893	0.336317687280199	-6.89506376615798	5.38406467674194e-12	7.27707e-11
GPR153	438.838162322412	1.02915	0.144785789579135	7.10806149633954	1.17684125143017e-12	1.77627e-11
GPR156	13.6275569956798	-1.52613	0.240956344007142	-6.3336431886945	2.3943888622361e-10	2.38948e-09
GPR157	1.93690623737258	-1.74031	0.344482724692734	-5.05194229108554	4.37339849341995e-07	2.3175e-06
GPR160	58.782608605118	-0.742522	0.12425430705987	-5.97582337078642	2.28930937748791e-09	1.88106e-08
GPR171	3.84052087013372	-2.52143	0.296623219445355	-8.50045518769985	1.88848698822445e-17	7.16082e-16
GPR172B	5.59152247080283	-1.46424	0.258311522031098	-5.66849581037638	1.44056592445895e-08	1.01506e-07
GPR173	323.627507720994	0.692825	0.0912678003413611	7.59112159491156	3.17148158301175e-14	6.48606e-13
GPR179	49.606651622038	0.733527	0.168859707034531	4.34400263469829	1.39909835664954e-05	5.49102e-05
GPR18	2.01781145580835	-2.99061	0.350548765584819	-8.53121402914821	1.44819821187126e-17	5.66775e-16
GPR183	165.462815428408	-0.721569	0.161239922085511	-4.475127656523	7.63656722740518e-06	3.14798e-05
GPR21	6.27542390998847	1.16099	0.247218704742394	4.69620202675934	2.65043406842925e-06	1.20107e-05
GPR37	1252.51544052187	-0.866106	0.174864299869675	-4.95301582514873	7.30720295262085e-07	3.71459e-06
GPR39	21.672529699771	-1.06954	0.182755348048972	-5.8522774889317	4.84886731723393e-09	3.76212e-08
GPR45	19.533894073463	1.12907	0.170448576031531	6.62412947425124	3.49300505538762e-11	4.04804e-10
GPR55	15.400301828899	-1.76395	0.207327145011224	-8.50807207562809	1.76849253069411e-17	6.75842e-16
GPR61	24.9731969456687	1.18559	0.187988855281792	6.30673017788939	2.84992023137717e-10	2.79542e-09
GPR65	95.2977311169191	-1.61766	0.182871980859519	-8.84583958188545	9.08426822794519e-19	4.49372e-17
GPR82	24.9070597216393	-2.42136	0.264745935441482	-9.14597872273684	5.90923231749627e-20	3.63315e-18
GPR84	31.9389592349321	-0.830457	0.191347470982009	-4.34004837300709	1.42451354373762e-05	5.57617e-05
GPR98	1821.83027924731	0.972672	0.170324829954965	5.71068671132556	1.12521214055176e-08	8.10435e-08
GPRC5A	36.0422745643621	-2.09212	0.294313230825548	-7.10846462625493	1.17340963358124e-12	1.77285e-11
GPRIN1	640.094147086831	0.626526	0.130676766029069	4.79447416584965	1.63102080444008e-06	7.74387e-06
GPRIN3	87.3188207009474	-0.760958	0.171798825566379	-4.4293545515407	9.4515530548632e-06	3.81942e-05
GPSM1	1857.49319552458	0.613589	0.0818569765362771	7.49587182907398	6.58591233688369e-14	1.25801e-12
GPSM3	508.389314902854	-0.671472	0.116267971024858	-5.77521467132958	7.68550348391043e-09	5.71938e-08
GPX8	77.3953096828988	-2.72302	0.225231155784657	-12.0898757067366	1.19467323177792e-33	8.31578e-31
GRAMD2	42.0077557124186	-0.883057	0.209360560790227	-4.21787427598544	2.46616253074067e-05	9.21678e-05
GRAP2	6.20715346670262	-1.87891	0.233319847977523	-8.0529332062015	8.08330223163041e-16	2.15813e-14
GRIA2	3104.98078412944	1.13291	0.123068286997867	9.20557873000193	3.39834966759117e-20	2.22261e-18
GRIA3	2215.1725331404	0.754262	0.0924164827759651	8.16154954859768	3.30753656687634e-16	9.50795e-15
GRIA4	3185.48600372915	0.934513	0.134035289730558	6.97214303432222	3.12148939539228e-12	4.36426e-11
GRID2	186.97799840394	0.874652	0.195643052909496	4.47065170003504	7.79816075664701e-06	3.20781e-05
GRID2IP	18.7781755165473	0.912669	0.121194726720161	7.53059755304823	5.05086389875458e-14	9.85399e-13
GRIK1	201.249753873035	-1.73368	0.260091814983363	-6.6656478512102	2.63500386211509e-11	3.13148e-10
GRIK2	803.375492299742	0.630242	0.128825366856067	4.89221814230414	9.97058451693982e-07	4.93357e-06
GRIN1	1138.59087117255	1.45062	0.285007052492286	5.08976146417712	3.58514211750877e-07	1.93558e-06
GRIN3A	115.942669870335	1.24818	0.213351587520378	5.85034253181524	4.90561701978335e-09	3.80161e-08
GRIP2	21.0373377020559	1.17387	0.245171742420909	4.78793772951692	1.68503912116793e-06	7.9809e-06
GRM4	39.6901684197044	2.02027	0.273198317075131	7.39487597929641	1.41540316380568e-13	2.50329e-12
GRN	3639.31300208547	-0.646235	0.0853630232015788	-7.57042745846035	3.71998115877375e-14	7.50369e-13
GSDMD	409.721145015745	-1.07372	0.13160119115072	-8.15885714218785	3.38209372070046e-16	9.67944e-15
GSN	10323.5202688976	-0.674116	0.114830130550885	-5.87054594964779	4.34362370312129e-09	3.41085e-08
GSTK1	1197.25048375999	-0.702335	0.0709824512889811	-9.89448671830413	4.39860976662846e-23	5.29191e-21
GSTM5	324.514126819618	-1.2451	0.256037987561376	-4.86295842277668	1.15644145309155e-06	5.65313e-06
GSX2	10.2750493652249	-2.84437	0.426825247673745	-6.6640264955874	2.66425401369172e-11	3.16046e-10
GTSE1	126.796756539883	-1.01161	0.220239047482658	-4.59321695226092	4.36464884866846e-06	1.88828e-05
GTSF1	3.03402881583029	-1.31566	0.277595294157926	-4.73950164681231	2.14244494197868e-06	9.8808e-06
GUSB	722.793745590708	-0.64038	0.0830814631856046	-7.70785197242816	1.27953036112806e-14	2.78949e-13
GVIN1	34.0455666312506	-1.03313	0.166058635068065	-6.22145558201658	4.92563612341786e-10	4.59994e-09
GYG2	763.980088587021	-1.33158	0.190662587801267	-6.98395003228637	2.86994173730739e-12	4.0621e-11
GYPC	547.043769661928	-0.620823	0.14740348247198	-4.21172803197562	2.53424551249396e-05	9.44768e-05
GZMA	16.8076849639499	-2.7811	0.300912751398805	-9.24221986925366	2.41435373818074e-20	1.61704e-18
GZMH	8.22763098216895	-2.56694	0.301535423153098	-8.51290599436611	1.69627589466644e-17	6.50796e-16
GZMK	14.2757177362706	-3.15848	0.325853171518198	-9.6929426270418	3.23083308291027e-22	3.24582e-20
H19	382.056189899252	-2.8067	0.385509572443445	-7.28049463494104	3.32598413829041e-13	5.53101e-12
H1FNT	3.56974392299758	0.980862	0.171803218559412	5.70921804369008	1.13496411502244e-08	8.16253e-08
H2AFJ	240.512303196882	-0.785384	0.119757176006678	-6.55813931301507	5.44832992713118e-11	6.09575e-10
H2AFY2	664.227395181286	0.688548	0.153914607040278	4.4735739281584	7.69229457747994e-06	3.16828e-05
HAAO	61.0007001593428	-0.694653	0.138026183996871	-5.03276575647024	4.83453718424185e-07	2.54456e-06
HABP2	9.62506563441362	-2.09045	0.2849230369225	-7.33687617664651	2.18636708309022e-13	3.72811e-12
HAMP	108.715460129948	-1.58137	0.247424542428198	-6.39133885381204	1.64439520029322e-10	1.70384e-09
HAPLN1	370.596976188668	1.41612	0.228238777477662	6.20457121469255	5.48462334686387e-10	5.06133e-09
HAR1A	32.1414637890268	1.0287	0.221417386957783	4.64596976871408	3.38482573278808e-06	1.49966e-05
HAVCR2	809.617571080243	-0.802806	0.127138300061913	-6.31443337207037	2.71153110589115e-10	2.67313e-09
HBQ1	8.1231349371156	1.61176	0.245192701658693	6.57345556389001	4.916074955795e-11	5.5609e-10
HCG26	31.5489946757632	-1.10328	0.177519808280429	-6.21497703807505	5.13321558068424e-10	4.75732e-09
HCK	482.203906738903	-0.693082	0.128692151858775	-5.38558130813494	7.22108818713722e-08	4.48928e-07
HCLS1	1473.25540108229	-0.873795	0.136724598146202	-6.39091384707532	1.64897273969135e-10	1.70768e-09
HCN3	200.983166701601	0.610367	0.0923534788993128	6.60903281316074	3.86838978906756e-11	4.45596e-10
HCP5	208.78725674229	-1.46459	0.156000884553664	-9.3883209868093	6.09642941998122e-21	4.64138e-19
HCST	147.679650817671	-0.831607	0.143338725123405	-5.80168785561048	6.56506904338889e-09	4.95016e-08
HDAC4	1297.62111143895	0.856097	0.0714085093827821	11.9887269214392	4.07113927467355e-33	2.64488e-30
HDHD3	145.580162179122	-1.15541	0.159574842582338	-7.24056841665777	4.46808121652964e-13	7.30388e-12
HEBP1	496.450512041996	-0.684332	0.110406525343055	-6.19829030617658	5.70797870719892e-10	5.25253e-09
HEBP2	287.414727841259	-0.604383	0.0838708588128525	-7.20611681426979	5.75700206038009e-13	9.23489e-12
HECW1	161.253660818792	1.12195	0.190863836220983	5.87829139432998	4.145227558156e-09	3.27087e-08
HELB	11.1088262203438	-1.13539	0.193688077930971	-5.8619467649568	4.57471703490982e-09	3.5779e-08
HERC5	345.139360519853	-1.01993	0.143999436693306	-7.08288934756509	1.41179404866117e-12	2.09725e-11
HERC6	572.104034816057	-0.776187	0.149192002943034	-5.2026036325347	1.9651570906133e-07	1.1186e-06
HES4	193.844148797501	0.780957	0.177396641762422	4.40232049644756	1.07099190347343e-05	4.29244e-05
HES5	256.303659443848	1.43622	0.243280291223497	5.90356704172541	3.55724969954732e-09	2.83794e-08
HES6	5538.74339970121	0.856205	0.144929314930084	5.90774284044243	3.46826854458181e-09	2.77006e-08
HES7	14.2639701213052	0.94199	0.210427051110609	4.47656494460657	7.58536009366731e-06	3.13019e-05
HEXB	898.456097798709	-0.835564	0.084405822008145	-9.89936939960617	4.18908035828185e-23	5.07113e-21
HFE	53.6368040152477	-1.54599	0.155824871929765	-9.92134285119545	3.36202100334427e-23	4.20037e-21
HFM1	80.2023225253758	0.917207	0.160958949341569	5.69838845266726	1.20945226326556e-08	8.65353e-08
HGD	3.40503112944907	-3.52408	0.450933363284785	-7.81507749433737	5.49292248776534e-15	1.25507e-13
HGF	77.0119109246195	-1.63745	0.226799192354971	-7.21981263487286	5.20592520083331e-13	8.39929e-12
HHIPL2	3.37597471795478	-1.3212	0.289733830037302	-4.56005438933813	5.11403734969784e-06	2.17751e-05
HIP1R	3562.55961291381	0.80892	0.119494694608903	6.76950800418586	1.29221064934648e-11	1.628e-10
HIST1H1C	254.913251475496	-0.688675	0.150223409178793	-4.58434187829313	4.55418569374133e-06	1.962e-05
HIST1H2AC	562.925112381598	-0.703868	0.129782975724376	-5.42342701518022	5.84670941546155e-08	3.69975e-07
HIST1H2AE	17.1621912304891	-0.885782	0.181091979690533	-4.89133659191673	1.00153523118946e-06	4.95429e-06
HIST1H2BC	18.0287978868366	-0.936514	0.162909871655479	-5.7486642558524	8.99512342032741e-09	6.6032e-08
HIST1H2BE	2.55975565756474	-0.86888	0.182711453284408	-4.75547397657899	1.97981363509618e-06	9.2114e-06
HIST1H2BJ	14.252975921349	-0.889668	0.164456984203199	-5.40973048191751	6.31196689754259e-08	3.97096e-07
HIST1H2BK	234.624187833155	-0.674435	0.0990173967399969	-6.81128162261953	9.67330522455629e-12	1.25188e-10
HIST1H3E	22.447694193125	-0.94088	0.190017581991963	-4.95154284539721	7.36274045486796e-07	3.7399e-06
HIST1H4H	35.5418381335432	-1.15182	0.143140606733202	-8.04677043249294	8.50074226150922e-16	2.26029e-14
HIST3H2A	94.1448265478037	0.819553	0.158280245753534	5.17785829978337	2.24447598913508e-07	1.26248e-06
HK3	41.4404805455545	-1.58024	0.200443373993996	-7.88370933267243	3.17803062950076e-15	7.55364e-14
HLA-A	12822.3178107344	-0.838987	0.11223808147709	-7.47506290971675	7.7166929371473e-14	1.45032e-12
HLA-B	13348.9470003675	-1.10326	0.130424706331598	-8.45900084328541	2.69678091499612e-17	9.95459e-16
HLA-C	9953.95132699636	-0.808909	0.124297218608034	-6.50786095955086	7.62284216291733e-11	8.34658e-10
HLA-DMA	1151.16437262035	-1.33326	0.140980435486805	-9.45702567758151	3.16826983072405e-21	2.51015e-19
HLA-DMB	1155.91829347466	-1.27536	0.141168962048397	-9.03431438748951	1.65033693052117e-19	9.48822e-18
HLA-DOA	835.666773177494	-1.87544	0.193185069837843	-9.70798591620264	2.78791412074541e-22	2.85981e-20
HLA-DOB	21.4834856585581	-1.58647	0.221792372850919	-7.15295589560127	8.49288982530093e-13	1.31894e-11
HLA-DPA1	4648.31600268295	-1.86068	0.18059942595495	-10.302812865654	6.84305276552892e-25	1.13992e-22
HLA-DPB1	2724.73184722608	-1.7418	0.181377988683881	-9.60316645440963	7.75254081093545e-22	7.02777e-20
HLA-DPB2	5.50248017987287	-3.06968	0.341826743890374	-8.98021941201269	2.7022733407232e-19	1.48778e-17
HLA-DQA1	794.564812376005	-2.18716	0.237677558429823	-9.20220333146026	3.50683973211553e-20	2.2859e-18
HLA-DQA2	211.583171440045	-2.53095	0.275887863083442	-9.17382144666543	4.56540945483473e-20	2.87961e-18
HLA-DQB1	969.666032073192	-1.76274	0.220955473236078	-7.97781155751342	1.48950566075639e-15	3.77509e-14
HLA-DQB2	38.3340983864214	-2.58309	0.292147942980826	-8.84172868834464	9.42488611373625e-19	4.63866e-17
HLA-DRA	9738.25844543123	-1.90052	0.177648807210313	-10.6981705024181	1.03807496134455e-26	2.62754e-24
HLA-DRB1	3045.7029289157	-1.80714	0.187088572578934	-9.65924868297265	4.49145786144845e-22	4.35515e-20
HLA-DRB5	1097.11820370475	-1.7889	0.212269347891829	-8.4275125040292	3.53090561182218e-17	1.26735e-15
HLA-DRB6	276.9623731128	-1.9668	0.228460686118387	-8.6089171993342	7.37538957342159e-18	3.06495e-16
HLA-E	6416.67694255184	-0.78859	0.104448572568044	-7.55002946390958	4.35159784957691e-14	8.61042e-13
HLA-F	624.881504749136	-0.984562	0.136989596629885	-7.18712861847436	6.61680740076814e-13	1.05361e-11
HLA-G	54.9670676359021	-1.22631	0.186861418424775	-6.56266436024937	5.2854729421652e-11	5.92715e-10
HLA-H	1265.69404996744	-0.839741	0.130587414761345	-6.4304894133073	1.27193739633456e-10	1.34218e-09
HLX	104.351818347568	-0.697556	0.132583342061704	-5.26126626351604	1.43066676610225e-07	8.35341e-07
HMMR	66.9989577108092	-1.14276	0.218884628465463	-5.22085055065522	1.78103229449371e-07	1.02245e-06
HMOX1	1098.49389000426	-0.977661	0.125396894797824	-7.79652989926413	6.3632750524873e-15	1.43542e-13
HMP19	2508.68075662095	1.2175	0.204063881166699	5.96627374732811	2.42732921631013e-09	1.98692e-08
HMSD	8.80562847961067	-1.43548	0.266516124796466	-5.38610493261179	7.20009377835429e-08	4.48052e-07
HNF4G	54.7776132435325	-1.03207	0.16546183972793	-6.23752500095097	4.44548077671771e-10	4.2039e-09
HOPX	2075.23706899222	-0.891577	0.190271813656558	-4.68580582495259	2.78860553304265e-06	1.25636e-05
HORMAD2	2.30063277667852	-2.74333	0.403171423210223	-6.80438132151407	1.01484407588304e-11	1.30557e-10
HOTAIR	6.52740445644358	-5.17009	0.846838590326151	-6.10516825243934	1.02692444150896e-09	9.06055e-09
HOXA1	14.5666791634151	-2.55542	0.31282534911368	-8.16882532514605	3.1140665421012e-16	9.05868e-15
HOXA2	21.911407006051	-4.4836	0.725137217757558	-6.18311138010118	6.28503361557167e-10	5.74017e-09
HOXA7	125.509359587437	-2.14312	0.486772510577205	-4.40271593941995	1.06904098122413e-05	4.28716e-05
HOXA9	12.472261544474	-2.75433	0.55160988868732	-4.99325916737657	5.9368804381504e-07	3.07575e-06
HOXB2	40.3194399965676	-2.42674	0.304803006363242	-7.96168258085437	1.69715397584651e-15	4.25161e-14
HOXB3	79.2684491485937	-3.21076	0.38208060326078	-8.4033582231897	4.33888563148586e-17	1.5292e-15
HOXB4	29.3712896160924	-3.50144	0.399935600040912	-8.75501704374471	2.04072644253649e-18	9.51525e-17
HOXB7	30.5677322253453	-1.80927	0.257231073976395	-7.03364020808411	2.01213580958585e-12	2.9179e-11
HOXC10	22.350609336431	-3.89282	0.574440459465298	-6.77672318976143	1.22932094450101e-11	1.55682e-10
HOXC11	4.73417807808327	-4.12543	0.794555286900144	-5.19212225288646	2.07910403085712e-07	1.17625e-06
HOXC13	2.62367208871905	-3.83564	0.732958398787243	-5.23309728155484	1.66692951046946e-07	9.61766e-07
HOXD10	25.9655471157444	-3.1278	0.553224044997304	-5.65377501536225	1.56961641870544e-08	1.0957e-07
HOXD11	13.6895112220016	-3.16349	0.699303861830429	-4.52376695607071	6.07486117591987e-06	2.55501e-05
HP	88.2332358553881	-1.06133	0.24889002331251	-4.26424026735274	2.00583516006116e-05	7.61467e-05
HPD	23.9004899088647	-2.4404	0.32684735020559	-7.46649588210108	8.2358549560391e-14	1.53311e-12
HPDL	15.7091662192232	-0.82064	0.160530704974642	-5.11204665697443	3.18687087288918e-07	1.73449e-06
HPS1	543.175675977958	-0.589002	0.109643453426899	-5.37197230659242	7.78800716764064e-08	4.80799e-07
HRASLS2	0.988294128113376	-1.96117	0.369421408620505	-5.30876239423914	1.10372104518235e-07	6.58852e-07
HRASLS5	80.083484526256	-1.41856	0.211551286375485	-6.70551766809767	2.00693606463955e-11	2.43405e-10
HRH1	508.446694981962	-0.827042	0.155574977919389	-5.31603325714343	1.06053774251231e-07	6.35801e-07
HRH3	118.468272198581	1.50786	0.254747992055197	5.91902679129454	3.23852213456182e-09	2.59535e-08
HRNBP3	237.452645853552	1.3835	0.278507761165911	4.96754312458001	6.7806482549898e-07	3.47228e-06
HS3ST3A1	21.914560627214	-1.49434	0.310857451897151	-4.8071516169871	1.53095884888498e-06	7.31333e-06
HS3ST3B1	11.4244438090706	-2.17038	0.384836190043055	-5.63974428343012	1.70302887600077e-08	1.18037e-07
HSD17B7P2	61.5959853115799	0.589957	0.125580319806716	4.69784516865301	2.62920616673737e-06	1.19392e-05
HSD3B7	234.476835836455	-1.03946	0.114511083237212	-9.07736401532498	1.11236078849073e-19	6.53009e-18
HSF2BP	58.1832081314327	0.732329	0.123897893308877	5.91074426305975	3.40565422989408e-09	2.72368e-08
HSF4	170.451834881884	0.851427	0.172595046271315	4.93308777429267	8.09397597696077e-07	4.0826e-06
HSFX2	42.2075388381029	0.587785	0.0828866918082112	7.09142816979704	1.32734969657019e-12	1.98695e-11
HSH2D	6.49287306193664	-1.71456	0.217751860586424	-7.87390647064508	3.43735948980366e-15	8.13036e-14
HSN2	15.0357614691329	0.899178	0.180523899827165	4.980938355249	6.32766957706987e-07	3.25657e-06
HSP90B3P	5.86758022041515	-1.03007	0.192244033484828	-5.35812753224672	8.40888778154019e-08	5.14082e-07
HSPA12A	900.012489052421	0.639011	0.137114487359318	4.66041796246698	3.15567920460377e-06	1.4071e-05
HSPA6	186.679449389868	-1.62964	0.203272470135331	-8.01703249772277	1.08330467540289e-15	2.83024e-14
HSPA7	74.2632775708359	-2.26497	0.216229846238401	-10.4748480922818	1.12718424934268e-25	2.21907e-23
HSPB1	3354.26944932977	-1.21561	0.157622083960746	-7.71221058008812	1.23656871646244e-14	2.70187e-13
HSPB6	1211.19576611128	-1.42817	0.21159870637175	-6.74943815612182	1.48418754454557e-11	1.84954e-10
HSPB7	62.9599610053308	-1.29924	0.195012318743272	-6.66233639545334	2.69508265361558e-11	3.19508e-10
HSPG2	1017.00765294687	-1.10322	0.172227441320789	-6.40559851789241	1.49780630493486e-10	1.56275e-09
HTATIP2	196.342297928089	-1.04954	0.122097222032485	-8.59594127385899	8.25850312100392e-18	3.36733e-16
HTRA3	54.7248460895639	-1.66581	0.253443745535875	-6.57268973104357	4.94143595014148e-11	5.58311e-10
HVCN1	437.766953120092	-0.875852	0.149884631615236	-5.84350779404405	5.11129057964879e-09	3.94063e-08
IBSP	17.9913931812652	-4.40065	0.550317576872849	-7.996555500514	1.27948111464265e-15	3.28985e-14
ICAM1	499.9355250166	-1.40998	0.161800289849317	-8.71433283219618	2.92475935727164e-18	1.31648e-16
ICAM4	3.35670457340623	-1.20835	0.222413858017182	-5.43288957843959	5.54487226263244e-08	3.52248e-07
ICAM5	202.299580747496	1.45111	0.262752420145237	5.52273406669601	3.33764716063967e-08	2.19544e-07
ICOS	2.78211561668802	-3.7614	0.446926365324531	-8.41614293867115	3.89082526823969e-17	1.38128e-15
ICOSLG	371.882745662129	-0.915321	0.135064269671649	-6.77693251395094	1.22754190110357e-11	1.55558e-10
IDO1	6.12037612485138	-4.01999	0.461190648194765	-8.71655006438028	2.86807175621958e-18	1.29395e-16
IFI16	1942.51763781995	-0.591418	0.110408616885081	-5.35663256201591	8.47872993745344e-08	5.1754e-07
IFI30	955.662218949837	-1.74522	0.168042129788501	-10.3856074431286	2.88327989487005e-25	5.21089e-23
IFI35	508.412113442983	-1.01674	0.132924803424744	-7.64901160138682	2.02529969789344e-14	4.25357e-13
IFI44	469.482942325734	-0.984835	0.146624590578882	-6.71671255273363	1.85870110827156e-11	2.26555e-10
IFI44L	2011.48343955434	-0.870604	0.19273697503776	-4.51705543160097	6.27054948198539e-06	2.6305e-05
IFI6	3241.94736618509	-1.29329	0.207856175318323	-6.22203558397487	4.90745693844062e-10	4.58735e-09
IFIH1	355.399218900544	-1.10444	0.130062402963046	-8.49162050805355	2.03775478737148e-17	7.63766e-16
IFITM2	770.3378244349	-0.758862	0.122474967569126	-6.19605772982429	5.78948992679415e-10	5.32251e-09
IFITM3	3268.22926611564	-1.15279	0.145659483098679	-7.91428815436041	2.48671751153269e-15	6.02064e-14
IFNGR2	1109.34776899836	-0.611104	0.0748594393950989	-8.16334755065565	3.25865150371357e-16	9.40905e-15
IGDCC4	897.433997768444	-0.678391	0.157735172645602	-4.30082325835245	1.70164742763688e-05	6.55571e-05
IGF2	917.224914033653	-1.3675	0.207936280027911	-6.57654054537996	4.81519740986762e-11	5.45312e-10
IGF2AS	6.69429405478106	-2.88113	0.425049221451197	-6.77834684300726	1.21558744788242e-11	1.54243e-10
IGF2BP3	139.097426478203	-1.97416	0.285382345351726	-6.91759249673646	4.59383442378798e-12	6.25673e-11
IGFALS	19.853296503296	0.769351	0.17019119900261	4.5205126899955	6.16900468141129e-06	2.59181e-05
IGFBP2	1733.64398768428	-1.80576	0.267183323339015	-6.75849956523801	1.39428068322725e-11	1.74868e-10
IGFBP4	929.732600992023	-0.721736	0.146066006814005	-4.94116069366855	7.76588691717508e-07	3.93135e-06
IGFBP5	9105.25973685501	-0.971715	0.145859722127479	-6.6619839684285	2.70155503463501e-11	3.20081e-10
IGFBP6	122.071189419813	-1.03836	0.207328572660564	-5.00827602133355	5.49197366367008e-07	2.85817e-06
IGFBP7	6348.58414740176	-0.977659	0.118539174882464	-8.24756358279197	1.61656491069969e-16	5.01701e-15
IGFN1	282.461649205309	2.50588	0.296235293182159	8.45910110900415	2.69446350050756e-17	9.95459e-16
IGJ	21.6725957917534	-2.98922	0.354114576594792	-8.44138034372374	3.13611858975017e-17	1.14249e-15
IGLON5	488.177596983608	0.636068	0.150195261445553	4.23494163686032	2.28611073243203e-05	8.58834e-05
IGSF6	151.979737545298	-0.854349	0.132818245515544	-6.43246855400976	1.25548011574649e-10	1.32553e-09
IKBIP	187.180593624233	-0.926265	0.105138889558535	-8.80991846078492	1.25236922120147e-18	6.02683e-17
IKBKE	135.787244306585	-0.867121	0.122893415801027	-7.05587724022283	1.71515196754753e-12	2.50775e-11
IKZF1	337.047599254964	-0.696935	0.1286330298212	-5.41800713195406	6.0267012716768e-08	3.80377e-07
IKZF3	2.00784004162759	-3.01627	0.397111513674135	-7.59553319190457	3.0652764759477e-14	6.28204e-13
IL10	10.9215317270022	-1.17544	0.227470693807417	-5.16744599691857	2.37314503808601e-07	1.32757e-06
IL10RA	549.275260350202	-0.637195	0.143207139713787	-4.44946536957733	8.60843083295598e-06	3.50634e-05
IL12RB1	49.939260402832	-0.760677	0.147068881572138	-5.17225300299748	2.31288123783443e-07	1.29609e-06
IL13RA1	1660.62837339967	-0.801978	0.105990995347921	-7.56647566065083	3.83485996151752e-14	7.7053e-13
IL13RA2	154.831967098586	-2.84579	0.381180337690229	-7.46573149965085	8.28381112435719e-14	1.5391e-12
IL15	15.7688651013056	-1.97798	0.211197889519558	-9.36551573699075	7.56797761718085e-21	5.56603e-19
IL16	286.363440079755	-0.699219	0.121452939796386	-5.75711820098911	8.55620018771825e-09	6.30712e-08
IL17RC	392.201334551915	-0.728518	0.141628284471379	-5.14387042255226	2.69135201196452e-07	1.49103e-06
IL18	286.272180239978	-0.917873	0.138327018740788	-6.6355274036291	3.23344286897569e-11	3.76913e-10
IL1A	20.7714341785082	-1.04096	0.22219903423444	-4.68478706078361	2.80251137485753e-06	1.26204e-05
IL1R1	333.46104253792	-1.33617	0.214704209280646	-6.22328504132706	4.86851698958671e-10	4.5554e-09
IL1R2	7.46812233560954	-1.61119	0.366971070683257	-4.39050058018015	1.13090013526398e-05	4.51295e-05
IL1RAP	551.87250554151	-1.17214	0.190583556488926	-6.15025916866898	7.73564368997077e-10	6.95744e-09
IL1RAPL1	21.5847251247925	0.748706	0.168240416271387	4.45021781544047	8.57832411538379e-06	3.49554e-05
IL20RA	62.8173124248477	-1.57998	0.286185920871288	-5.52081248231621	3.37435733416722e-08	2.21659e-07
IL21R	53.6546970525323	-1.70982	0.291644499851328	-5.86269471841722	4.55415063850827e-09	3.56324e-08
IL22RA1	1.87057261133664	-1.86744	0.415072454079794	-4.49908111682609	6.82478144178216e-06	2.84402e-05
IL28RA	106.048569706743	-0.680456	0.161102616112029	-4.22374173917612	2.40279380278423e-05	8.99375e-05
IL2RA	6.95987592979084	-3.53466	0.481147294193056	-7.34632389278872	2.03732345246423e-13	3.49537e-12
IL2RB	34.5739866121409	-2.40339	0.240163580483888	-10.0073134851728	1.41543998004429e-23	1.90255e-21
IL2RG	59.653454114252	-1.77962	0.174842926272858	-10.1783742464809	2.47664395316247e-24	3.74184e-22
IL32	253.783322885772	-1.01134	0.176043123550249	-5.74485593912675	9.19992780763699e-09	6.74085e-08
IL4I1	62.0728916552571	-0.97285	0.146865017595794	-6.62410921321848	3.49348413443216e-11	4.04804e-10
IL6	17.612257987443	-1.76722	0.268501482005433	-6.5817897128002	4.64818705828959e-11	5.2824e-10
IL7	12.6987918770293	-1.42937	0.196760667213403	-7.26452742284806	3.74344677700809e-13	6.18303e-12
IL7R	9.37410071005299	-1.99073	0.313093393299359	-6.35826889752025	2.04040066764917e-10	2.06691e-09
IMP5	2.03295600574499	1.4995	0.22616809268162	6.63002650878944	3.35626590390538e-11	3.90063e-10
IMPA2	77.6626915478144	-0.643059	0.10656639672447	-6.03435500624008	1.59598856636992e-09	1.35302e-08
INA	933.270855221013	1.03524	0.230634588598422	4.48866519842075	7.16708339332553e-06	2.97585e-05
INADL	325.948010735792	-0.670636	0.128093523804149	-5.23551521184203	1.64525272903514e-07	9.50103e-07
INMT	69.9171924904934	-1.5019	0.237996184178197	-6.31059579576137	2.77963294555056e-10	2.73197e-09
INPP5D	1190.1088167792	-0.644564	0.107830774427408	-5.97755347888234	2.26513579411838e-09	1.86355e-08
INSM2	12.2761306078881	1.52021	0.264999798591815	5.73662742153527	9.65803948541723e-09	7.05265e-08
INSRR	8.16680679119637	-2.28975	0.333864330720002	-6.85833743128968	6.96665500034592e-12	9.22419e-11
IQCA1	148.257392651638	-1.19198	0.258052852286681	-4.6191372915021	3.85338837177319e-06	1.68732e-05
IQCD	63.7015820524793	-0.7092	0.120827896468572	-5.86950782100176	4.3709073602503e-09	3.42951e-08
IQCG	469.304063340677	-1.24345	0.119219532328955	-10.4299429001334	1.80997029486261e-25	3.39195e-23
IQCH	37.6026422421383	-0.980648	0.123691038291916	-7.92820755576439	2.22331500128749e-15	5.46436e-14
IQGAP1	1984.73088583237	-0.969022	0.10535533478477	-9.19765482577657	3.65846829088886e-20	2.36889e-18
IQGAP2	379.674936414413	-1.51203	0.19971388543772	-7.57095753515615	3.70483155172694e-14	7.48261e-13
IQGAP3	133.423562829483	-1.10164	0.23422518564404	-4.70335457429428	2.5592140191909e-06	1.16485e-05
IQSEC3	214.716748609633	1.07812	0.251748391571284	4.28253941359422	1.84772389684787e-05	7.06259e-05
IQUB	25.8014657137049	-1.56115	0.176370663341343	-8.85155078132862	8.63114853167343e-19	4.30233e-17
IRF1	394.766853515204	-0.995909	0.141824032231051	-7.02214288598337	2.18490916100305e-12	3.14504e-11
IRF5	358.478266908953	-0.618985	0.116592614101906	-5.30895415851831	1.1025605719664e-07	6.58563e-07
IRF7	314.188546804683	-0.924256	0.156209721091781	-5.91676054141612	3.28344179052750e-09	2.6281e-08
ISG15	1409.1699171277	-1.54753	0.238972491627425	-6.47576623786177	9.4331994631274e-11	1.02084e-09
ISG20	82.657295768219	-1.22044	0.199534924541881	-6.11641506567031	9.57038571484547e-10	8.47079e-09
ISLR	331.793610913977	-1.08518	0.196696317945349	-5.51702144069139	3.44793383071258e-08	2.26111e-07
ISLR2	128.250745607276	1.07248	0.244055220960848	4.39442541149254	1.11066129301339e-05	4.44037e-05
ITGA1	231.136515288965	-0.708148	0.168107301656609	-4.21247581764335	2.52586763745225e-05	9.41824e-05
ITGA2	277.882097927431	-1.32916	0.176044301905239	-7.55015792408646	4.3473077657903e-14	8.61042e-13
ITGA3	1170.03396470812	-1.0388	0.188013348917342	-5.5251259669575	3.29249296735831e-08	2.16793e-07
ITGA4	100.999905013144	-1.50898	0.194944061780439	-7.74056344189909	9.89771993039913e-15	2.19461e-13
ITGA5	603.613033317728	-1.0306	0.14492001860607	-7.11150885054722	1.14781099146796e-12	1.73822e-11
ITGA7	2041.48559329573	-0.817438	0.163978692615877	-4.98502476389807	6.19538774067526e-07	3.19439e-06
ITGAL	276.353830832921	-1.07379	0.162811607204364	-6.59529472804223	4.24411882859085e-11	4.86862e-10
ITGB1	3087.23537850139	-0.652797	0.0917556147801484	-7.11451627702998	1.1230601543565e-12	1.70471e-11
ITGB2	2468.59078011702	-0.93966	0.134612247866152	-6.98049412528906	2.94143662078362e-12	4.14823e-11
ITGB3	75.5872036997516	-1.08096	0.23542884526267	-4.59144643928079	4.40184614023057e-06	1.90353e-05
ITGB4	3224.71346072318	-1.02957	0.153293303057192	-6.71632103521411	1.86369952403703e-11	2.27022e-10
ITGB7	41.4876036095405	-1.26898	0.171067137759139	-7.41802134329878	1.18882946636732e-13	2.13354e-12
ITGB8	4792.59077587615	-0.769562	0.119096903156796	-6.46164696579274	1.03569499871379e-10	1.11015e-09
ITK	20.4819372310126	-1.91462	0.296266143826624	-6.46248950793331	1.02994289164524e-10	1.10659e-09
ITPRIPL1	64.2696613112662	-0.763027	0.166632372854074	-4.57910529334511	4.6696909569398e-06	2.00556e-05
IZUMO1	1.56264955316913	1.87116	0.338709718649856	5.52438469168479	3.30642298575284e-08	2.17637e-07
JAK3	177.727290843699	-1.23668	0.189040790168462	-6.54188502629979	6.07481995922573e-11	6.75018e-10
JPH3	993.380087501928	1.2715	0.187153838841793	6.79387896500577	1.09157975897288e-11	1.39782e-10
JPH4	1936.13945499329	1.11612	0.13594552787005	8.21005055673332	2.21095382200769e-16	6.69123e-15
JUB	162.855134003667	-0.661561	0.108501820975685	-6.09723181195308	1.07920964992595e-09	9.47895e-09
KATNAL2	91.7071304078529	-0.767495	0.130734208484845	-5.87065262124976	4.34082961385237e-09	3.41003e-08
KBTBD12	56.6807235729609	-0.739747	0.162852581905745	-4.54243213942512	5.56089002241536e-06	2.35357e-05
KCNAB2	981.882365290857	0.753695	0.169540295294915	4.44551868817371	8.76800579530581e-06	3.56463e-05
KCNB1	250.909802578537	0.758028	0.168484665918882	4.49908899481725	6.82452856332216e-06	2.84402e-05
KCNC1	350.625088368614	0.701934	0.146638329842138	4.78683739836665	1.69429993236944e-06	8.02281e-06
KCND2	1574.30744907246	0.937859	0.148500160162168	6.31554531464496	2.69210486199917e-10	2.65801e-09
KCNE1	4.10339079112078	-2.13553	0.307853915440006	-6.93682147655875	4.01020062915409e-12	5.50802e-11
KCNE3	104.074263778231	-0.958993	0.117907431829988	-8.13344321117898	4.17265605274836e-16	1.16179e-14
KCNE4	182.695841183243	-1.20611	0.190691077155321	-6.32492091324886	2.53362313073537e-10	2.5194e-09
KCNH3	325.437810884296	0.946753	0.22113305830528	4.28137334536371	1.85743429688101e-05	7.09692e-05
KCNIP2	584.861803622322	1.19308	0.184643537340478	6.46150461313116	1.03666994880506e-10	1.11015e-09
KCNIP3	1480.02363716062	1.00462	0.133169193012273	7.54391264858248	4.56076688576258e-14	8.9969e-13
KCNJ11	280.086557123323	1.13439	0.173211634134322	6.54917221635368	5.78568811085879e-11	6.45098e-10
KCNJ12	48.2036972501422	1.03186	0.18155432437213	5.68346037571527	1.31996317452695e-08	9.38223e-08
KCNJ13	3.5781177134866	-2.09481	0.33250387863899	-6.30010722362299	2.97439813786485e-10	2.90727e-09
KCNJ2	159.97796495759	-0.831654	0.13930852748648	-5.96987440251447	2.37436296579781e-09	1.94684e-08
KCNJ4	201.828347852511	1.1698	0.232400201575438	5.03354580985702	4.8148968871559e-07	2.53559e-06
KCNJ5	100.592561780709	-0.756198	0.165298872793947	-4.57473127080359	4.76831624527504e-06	2.04476e-05
KCNJ8	257.98014208672	-0.654554	0.115357162373288	-5.67414781765366	1.39380742410803e-08	9.86037e-08
KCNJ9	446.33940684376	0.743036	0.138818115960911	5.35258380077802	8.67071256196976e-08	5.28762e-07
KCNK13	74.9492440032708	-0.782637	0.133532735469259	-5.86100863531141	4.60064049018856e-09	3.59385e-08
KCNK3	188.335411675256	0.971553	0.206759000978858	4.69896192924095	2.61487187760687e-06	1.18852e-05
KCNK4	64.5110008995619	1.44609	0.18080268855287	7.99817627620799	1.26275508419675e-15	3.25544e-14
KCNK5	13.2278717166509	-2.05238	0.337131922251445	-6.08775475241605	1.14505089991123e-09	1.00211e-08
KCNK7	32.3191858466305	0.752887	0.151219353106276	4.97877477722685	6.39880508162332e-07	3.29057e-06
KCNMB1	129.413157404575	-1.32479	0.156499785596318	-8.46509498024688	2.55944028242633e-17	9.50162e-16
KCNN1	263.83685181733	0.780231	0.154111696760808	5.06276415251301	4.13220928768014e-07	2.20407e-06
KCNN4	40.4738937229731	-1.31712	0.227567270633782	-5.78780512589741	7.13120725971232e-09	5.35184e-08
KCNQ2	1222.81528060762	0.598274	0.121963116261986	4.90536670511874	9.3252951707089e-07	4.64122e-06
KCNT1	101.532597064332	1.44088	0.277165462418318	5.19860961821189	2.00784705197361e-07	1.14057e-06
KCNV2	1.43562940510488	1.07584	0.214460631042698	5.01650483634869	5.26199524429032e-07	2.74729e-06
KCTD14	42.3425853001971	-0.944262	0.163010156332557	-5.79266001334126	6.92802655770276e-09	5.20537e-08
KDELC2	467.495262442662	-1.22994	0.117334591778695	-10.4823521721505	1.04121344724276e-25	2.07074e-23
KDELR2	2514.91235372428	-0.597469	0.0657557736289834	-9.08618161891334	1.02578322181862e-19	6.05834e-18
KDELR3	36.0645099470022	-1.80265	0.163310771463315	-11.0381416153447	2.50153341224853e-28	8.12581e-26
KDM4B	1720.1930255803	0.584682	0.0657184567082735	8.89677389913192	5.74934615045276e-19	2.98018e-17
KHDRBS2	45.7962186700139	1.25066	0.267568603827079	4.67416484357089	2.95152200193768e-06	1.32363e-05
KHNYN	518.296503886043	-0.844615	0.114386036139837	-7.38389989276239	1.53719043395873e-13	2.7064e-12
KIAA0040	496.799632772107	-0.960404	0.202195878016241	-4.74986830077475	2.0354916640139e-06	9.45481e-06
KIAA0087	19.7271764593278	1.59356	0.197301901810113	8.07673700549118	6.65228021463816e-16	1.79824e-14
KIAA0101	93.8890269285635	-1.23473	0.237139796654677	-5.20677292059933	1.92152999312699e-07	1.09729e-06
KIAA0284	806.079229346791	0.860263	0.126962145383237	6.77574423527513	1.23767464549133e-11	1.56638e-10
KIAA0427	2004.21204521502	0.587468	0.0616422187099108	9.53029214596464	1.56841224175396e-21	1.34662e-19
KIAA0495	383.752326665739	-1.20471	0.159983409816425	-7.530229381468	5.06512635391225e-14	9.87193e-13
KIAA0513	1848.12058879609	0.661331	0.134065473414686	4.93289215380578	8.10208948680778e-07	4.08458e-06
KIAA0895	188.983893974731	-0.682237	0.106772543414365	-6.38963331549788	1.6628401203038e-10	1.72021e-09
KIAA0895L	1011.38337229853	0.731344	0.103389293772355	7.07368770270139	1.50869613219276e-12	2.22761e-11
KIAA1244	495.738024594728	0.814823	0.168568458219229	4.83378063955869	1.33964199862999e-06	6.46598e-06
KIAA1257	9.91671635603977	-1.72065	0.244101316623477	-7.04890153920629	1.8033569409573e-12	2.6308e-11
KIAA1409	442.820592426707	1.18547	0.156815089821528	7.5596964800348	4.04010988011471e-14	8.0678e-13
KIAA1543	243.01762292982	1.44854	0.173084968413603	8.36896294868196	5.81275223650394e-17	2.02305e-15
[truncated: 1,543 more rows]

## Sheet: DAVID_analysis
Category	Term	Count	%	PValue	Genes	List Total	Pop Hits	Pop Total	Fold Enrichment	Bonferroni	Benjamini	FDR
[truncated: 1,681 more rows]

[truncated: 1 more sheets: DAVID_analysis_UP_DOWN]
