# Supplementary material for: Transmembrane Protein TMEM230, a Target of Glioblastoma Therapy
Source: Front Cell Neurosci. 2021 Nov 17;15:703431. doi: 10.3389/fncel.2021.703431 (PMC8636015; doi:10.3389/fncel.2021.703431)
Supplement: Supplementary Table 5 — All enriched pathways identified different between high or low TMEM230 expression in glioblastoma of patients from DEG. [file Table_5.XLSX]

## Sheet: all_genes
gene_name	baseMean	log2FoldChange	lfcSE	stat	pvalue	padj
A1BG	221.354010331801	-0.671850419303335	0.173836330546421	-3.86484469150667	0.00011115990807697	0.000494581837421136
A1CF	0	NA	NA	NA	NA	NA
A2BP1	129.838407968681	0.0767146416501189	0.307809980284102	0.249227271901037	0.80318498493677	0.857808249494498
A2LD1	112.81310267632	-0.577954977138115	0.141450012473773	-4.08593090258847	4.39004428607193e-05	0.000224019287982087
A2M	23238.2712896452	0.0212374070552456	0.140104884470082	0.1515822031157	0.879516471044606	0.915878645933191
A2ML1	94.0399894962745	-0.305287181936598	0.28809747539442	-1.05966628662276	0.289296445498693	0.396275975005598
A4GALT	119.016359236026	-0.184354408874181	0.172858073568836	-1.0665073668125	0.286194350335715	0.393122735061029
A4GNT	0.814974482208861	0.500081412136877	0.389302387897271	1.28455778254522	0.198946859428664	0.295879939367718
AAA1	0.17267226051219	0.662031997225216	1.1251670755029	0.588385504374378	0.556273565210137	NA
AAAS	836.509019878151	0.0915929622957721	0.0564583911666477	1.62230910947175	0.104737179175731	0.175006357920314
AACS	463.295782799231	0.102478759531403	0.0682714491280936	1.50104854723574	0.133343005439094	0.213805332544281
AACSL	0.485795852771233	0.361222106466805	0.571230019616007	0.632358409156485	0.527152704588785	0.629210475829608
AADAC	0.131010681917847	-0.420729472009733	1.05306191554452	-0.399529662785478	0.689502971659645	NA
AADACL2	0	NA	NA	NA	NA	NA
AADACL3	0.0243543899682945	0.00278501101806508	2.90284728369466	0.000959406660387726	0.99923450435558	NA
AADACL4	0.00583191579521309	-0.0315546366945159	2.90284728369466	-0.0108702365679927	0.991326976874149	NA
AADAT	208.513064398605	0.125992429023108	0.0856414595003554	1.4711616284702	0.141247411563662	0.224218998784951
AAGAB	982.182132359626	-0.286545149096094	0.0568425725476214	-5.041030626403	4.63031348502753e-07	4.16774563136812e-06
AAK1	806.632814922899	0.374143852063305	0.0887481431022432	4.21579358153183	2.48901352566808e-05	0.000135520494234377
AAMP	2298.74278195036	-0.0565282151545785	0.0447468095177627	-1.26329040581405	0.206484832907405	0.30440390482882
AANAT	3.97751513613331	-0.48684588315511	0.217145258636648	-2.24202861352712	0.0249595230668191	0.0528769069187979
AARS	3865.63578596569	0.283226317460845	0.0577759309418116	4.90215065069387	9.47930938816335e-07	7.82358421462734e-06
AARS2	393.014891182249	0.428466039692552	0.0845395755349835	5.0682303167615	4.01531371244603e-07	3.68990300483543e-06
AARSD1	471.671605790912	0.0734873419172621	0.0588738585545377	1.24821684396967	0.211951657112857	0.31062982654369
AASDH	292.184379969974	0.0386737002765265	0.0803361539710852	0.48139845343413	0.630233335657274	0.719169816526676
AASDHPPT	1380.1750143662	0.0169690383575538	0.0593640245096675	0.285847169185614	0.774995178908216	0.837339338989809
AASS	1020.39370485918	0.321028744618178	0.107972095675251	2.97325658644007	0.00294658016295488	0.00857325637446702
AATF	994.95545158873	0.263513911077381	0.0687138136541901	3.83494812853124	0.000125590796440343	0.000550749788632803
AATK	509.882210637121	0.900330705956008	0.204580604114316	4.40086053051695	1.07822414717524e-05	6.51572011518802e-05
ABAT	5235.81080815762	0.293342556883128	0.131906412468761	2.22386881269021	0.0261572719274807	0.055031864569936
ABCA1	2500.86551036182	-0.050265023574723	0.1278520863628	-0.393149810884494	0.694208836213963	0.772799092269221
ABCA10	5.53709661854916	-0.0652442446258721	0.217202002246705	-0.300385097517498	0.763883429594781	0.828403255860473
ABCA11P	138.41064986233	-0.282842381705299	0.104773213884618	-2.69956767783015	0.00694296326893443	0.0178145600554311
ABCA12	10.4326575998018	0.182761233874854	0.245729179420495	0.74375063761602	0.457027348432931	0.565047424324063
ABCA13	70.5394941714292	-0.320090144264039	0.330577112031409	-0.968276788120849	0.332906154073514	0.443710388709558
ABCA17P	31.0208690535497	-0.624057098096406	0.153512373580456	-4.06519086078321	4.79931705015091e-05	0.00024203846839572
ABCA2	3296.98198663284	0.689602791673723	0.135974681952064	5.07155289333076	3.94582559436521e-07	3.63347298971141e-06
ABCA3	2485.01589955065	0.435074536492806	0.100397673329434	4.33351214290793	1.46749182367433e-05	8.50237530829871e-05
ABCA4	6.91510525480573	-0.301741513575673	0.218730285938254	-1.37951410012261	0.16773630190152	0.257573414380918
ABCA5	224.896901176878	-0.278494095739898	0.183546101276426	-1.51729780040643	0.129191513315662	0.208262833943068
ABCA6	35.4889758764825	0.507353127965793	0.296735327298506	1.70978337019984	0.0873059392754789	0.150697668366493
ABCA7	170.305077027543	0.380812770560368	0.168985925323838	2.25351768101749	0.0242265271847826	0.0515853498568706
ABCA8	494.982716100488	-0.104091263084944	0.183390807724951	-0.567592587525217	0.570311641531835	0.667479146252019
ABCA9	31.9897587357947	0.326339894927581	0.190653230813886	1.71169349469956	0.0869531680888899	0.150232085206129
ABCB1	354.982280682946	0.290105985915026	0.139613400520339	2.07792364367462	0.0377163924520294	0.0748088234098706
ABCB10	343.812666427641	0.0180200657037418	0.0615518468909413	0.292762388359688	0.769703778945081	0.832923326346251
ABCB11	1.29238147351798	-0.553637861228012	0.658932664823697	-0.840204000777746	0.400794015610414	0.512687927785596
ABCB4	76.1387287245229	0.174826532065514	0.142870503564496	1.22367128066146	0.221076257860082	0.320942478314152
ABCB5	1.16414678249408	-0.2414064198338	0.415739020166539	-0.580668179130975	0.561464111928002	0.659570879150381
ABCB6	816.966166707851	-0.00707851505505645	0.0717770284984595	-0.0986181122726246	0.921441488610249	0.945035855783673
ABCB7	495.35967820829	-0.0480733846866136	0.0572262093892318	-0.840058868125197	0.400875380707871	0.512755536746114
ABCB8	1056.69087877356	-0.066734002631957	0.0685867865089009	-0.972986285387443	0.330560118370767	0.441237438973065
ABCB9	278.295207261832	-0.130952554518963	0.0993739501340204	-1.31777547679602	0.187578819523914	0.281869776931657
ABCC1	574.725735017108	0.397813344043038	0.110240726209995	3.60858783971773	0.000307868275910025	0.00119351219529336
ABCC10	362.775528969848	0.346131674295473	0.0710579917985029	4.87111534585706	1.10970029480413e-06	8.99767813424596e-06
ABCC11	8.38130882763996	0.446929070357683	0.263436404366143	1.69653496233007	0.0897846148119392	0.154310828316761
ABCC12	3.4104108758291	-0.944148867652622	0.519705197090761	-1.81670083912541	0.069262933195728	0.12450020895472
ABCC13	0.690774623088066	0.0143633212515009	0.807887675681312	0.0177788592199874	0.985815269993721	0.990164859847365
ABCC2	4.55402121215398	1.02802811328824	0.229633923962866	4.47681290093043	7.57655927509541e-06	4.79946607972229e-05
ABCC3	1444.03706547031	0.0212250366989463	0.239611149330268	0.0885811731143227	0.92941477093619	0.950557054169497
ABCC4	399.371585526068	0.0459331942001731	0.0956569373059145	0.480186753766504	0.631094604907364	0.71983198484643
ABCC5	908.897347097808	0.298097598580586	0.100094201705517	2.97817049840316	0.0028997462936498	0.00845888683617161
ABCC6	31.4411914996713	-0.277474673540219	0.176222455737103	-1.57457046197432	0.115355625374321	0.189414766409647
ABCC6P1	14.2301271003287	-0.323016069955535	0.224031664829586	-1.44183220796597	0.149349714432747	0.234442305866773
ABCC6P2	23.3005137826938	-0.715530228044788	0.157101784821375	-4.55456460191301	5.24941911043817e-06	3.48617257319498e-05
ABCC8	125.328564240385	1.02958267020994	0.264276423805335	3.89585516326015	9.78528543239295e-05	0.000443829945059659
ABCC9	250.872032228769	-0.00809565032623741	0.17903202943255	-0.0452190055148062	0.963932745534152	0.974608787074053
ABCD1	434.14648356275	0.141597936035949	0.0915463528892304	1.54673486782461	0.12192719156619	0.198412785561057
ABCD2	202.047576929664	-0.220959329718771	0.165379026551628	-1.33607830645799	0.181523679804441	0.274617108342585
ABCD3	1947.14671700211	-0.225656870601496	0.0720379706624876	-3.13247123046738	0.00173341414778859	0.00541963143842665
ABCD4	908.184793260862	-0.137468477014003	0.0785686404060815	-1.74966088637271	0.0801768467220441	0.140700664661323
ABCE1	1366.55584861642	-0.125827349229992	0.0516453314195708	-2.43637412659356	0.0148353317065498	0.03410002625391
ABCF1	1589.96302298979	0.47797417627486	0.0634808639158205	7.52942141601417	5.09656475844895e-14	5.91333036231909e-12
ABCF2	2004.8530846104	-0.033368180949057	0.0519370191323077	-0.642473932977415	0.520565509118524	0.622812450000899
ABCF3	1063.80545413855	0.10716139133268	0.0481761122393256	2.22436776966003	0.0261237104984883	0.0549805511532843
ABCG1	592.620227539162	0.0745221014764308	0.119951978788503	0.621266128571559	0.534424535818311	0.636201155236414
ABCG2	893.75286760423	-0.218563046601283	0.152954605096836	-1.42894060929326	0.153021304217973	0.239340331801707
ABCG4	31.5990947874031	0.450766207302587	0.189665737268824	2.37663488299781	0.0174713723819381	0.0391679332980272
ABCG5	1.41175414264741	0.0934322208642004	0.240819579763037	0.387976014891051	0.698033783407215	0.775864987880761
ABCG8	0.120165603328718	-0.0705490575874981	1.11333528516129	-0.0633673059030709	0.949474021020328	NA
ABHD1	22.873287020675	-0.557084941560819	0.162645195329605	-3.42515461604551	0.00061444963110024	0.00218470979946752
ABHD10	857.380974086714	-0.300836057507172	0.079287227188382	-3.7942562525538	0.000148086675416725	0.000636213753152026
ABHD11	426.912813063689	-0.395842661128251	0.0903637596342308	-4.38054661216532	1.1838196433575e-05	7.0636404997151e-05
ABHD12	2176.48875082225	-0.263650164165276	0.0587081815531945	-4.49085897723449	7.09365088083659e-06	4.54317013678651e-05
ABHD12B	11.1713661938921	-0.62474244555406	0.228299330384991	-2.73650581672986	0.00620954971654731	0.016203542951773
ABHD13	448.0858618641	-0.224883679983286	0.0727664187183956	-3.09048712227519	0.00199828469788354	0.00613157345277898
ABHD14A	488.458444548716	-0.354378692641996	0.0960835387757723	-3.68823522902295	0.000225814841958855	0.00091671650514403
ABHD14B	693.354141500082	-0.38020481101045	0.0858964376384177	-4.42631640453971	9.58558935249902e-06	5.88754231268246e-05
ABHD15	269.149521810093	-0.0333930073369011	0.0885341567512489	-0.377176544762539	0.706042409840672	0.781863712966419
ABHD2	3923.8307369689	0.308930465160792	0.117997518113055	2.61810985604631	0.00884183348951414	0.0219326253069548
ABHD3	452.912472521561	-0.152090165392819	0.0825899302761874	-1.84150979283089	0.0655468868439763	0.118974082862542
ABHD4	1950.15414364528	0.0365458234023613	0.0850642098786352	0.429626319394523	0.667467488461391	0.750890486206034
ABHD5	818.077609163611	-0.121225339625343	0.0642276918076433	-1.88743104747409	0.0591023724564625	0.109104605446214
ABHD6	573.795464346853	0.165923825166533	0.106799312939338	1.55360386317072	0.120278937258525	0.1961814264155
ABHD8	640.904973704932	-0.211876338399703	0.0839362726826688	-2.52425240754646	0.0115944646643592	0.0276064120000567
ABI1	1365.34453371173	0.00997875530274348	0.0671841201415014	0.148528480863134	0.881925710747916	0.917802903888116
ABI2	3100.68153960606	0.172504936697577	0.0676617094231459	2.54952081713983	0.0107871070818696	0.0259421414496312
ABI3	498.527939382208	-0.312029576561196	0.124101249659068	-2.51431454089629	0.0119264011663621	0.0282765055606375
ABI3BP	291.5552230578	0.367810236484671	0.248141129547985	1.48226228015757	0.138270520679305	0.220389705211081
ABL1	2625.46339841344	0.462070849237043	0.0850284240268106	5.43431040297002	5.50087511877772e-08	6.67528597409571e-07
ABL2	718.255859162782	0.371663183516092	0.0963672653703119	3.85673685029763	0.000114910752409026	0.000509129088771598
ABLIM1	2146.80602004464	0.467029280473269	0.109862656694068	4.25102846159816	2.12791121972695e-05	0.000118039344156599
ABLIM2	160.070406130251	0.00864735303360125	0.136596098338907	0.0633060031637685	0.949522835520826	0.964594626560839
ABLIM3	499.296637633198	0.363467246550338	0.154290482338003	2.3557334259549	0.0184861784225485	0.0411098593732054
ABO	1.56651323470534	0.324544701323109	0.300441351143826	1.08022647377772	0.280041342153004	0.38613729344588
ABP1	1.91366816548528	-0.0501970907770092	0.33592405071093	-0.149429880566083	0.88121443513436	0.917115763973168
ABR	3866.56882763898	0.317572485994598	0.0886196731374411	3.58354386505208	0.000338963808766278	0.00130032532782695
ABRA	0.401519529392498	-0.993962510928788	0.647273762912204	-1.53561378180504	0.124633132041236	0.202000923452559
ABT1	557.476866855006	-0.279056382695691	0.0687827716196064	-4.05706801463271	4.96926142103962e-05	0.000249420031805684
ABTB1	392.347166848679	-0.205184791677162	0.0843459111980158	-2.43265842721714	0.0149884328738774	0.034403570747136
ABTB2	212.580097684449	0.309326048221571	0.149096093256231	2.07467574411876	0.0380165968799848	0.0752797267440703
ACAA1	1615.88133585874	-0.15537345282912	0.0602578350255387	-2.57847718497138	0.00992368526725763	0.0241694956454985
ACAA2	1322.79795362621	-0.136117560725204	0.104731032700112	-1.29968699072188	0.193708270917755	0.289581259030179
ACACA	1486.31199042912	0.557544386403645	0.0774448730056474	7.19924205134907	6.05481831475115e-13	4.35559410289939e-11
ACACB	306.248300876079	0.292546476314682	0.124922708923076	2.34181982472718	0.0191899764400517	0.0424067941663122
ACAD10	434.375429720354	0.045854270544978	0.0669773481550701	0.684623560174603	0.493581495949452	0.598877993735997
ACAD11	638.985830629885	0.0366771174804395	0.0916067521330565	0.400375699677322	0.688879819631629	0.768534326434871
ACAD8	938.772750337427	0.0418357970937612	0.0636802536886636	0.656966558241096	0.511202419636045	0.614988582161658
ACAD9	773.975644903569	-0.0419475090740616	0.0438379175267027	-0.956877320837844	0.338629179472737	0.449685055816991
ACADL	41.2440652586826	-0.280751803865856	0.285097319812878	-0.984757780431347	0.324743063415066	0.434860703831463
ACADM	1211.58520768611	-0.214423211778801	0.062727084090717	-3.41835133717834	0.000630017242185377	0.00223299765145089
ACADS	377.410946854639	-0.278760506133351	0.0873696480328186	-3.19058749130637	0.00141983843827597	0.00454482475650711
ACADSB	364.559301773334	0.0628818509393315	0.0823268049235318	0.763807741570179	0.444981822744593	0.553223133437528
ACADVL	3846.828517817	-0.0839128273674624	0.0741224196773096	-1.13208429693438	0.257598996070411	0.362011435909218
ACAN	213.500796266982	1.09248721524531	0.304824533721258	3.58398716110009	0.000338388725855121	0.00129839616935748
ACAP1	41.0698041459746	-0.544187252600581	0.189875477148639	-2.86602177791806	0.00415665649722806	0.0115146812147488
ACAP2	908.706512516675	0.0407438496647307	0.0602843757685493	0.675860853584337	0.499128994015082	0.603857102480137
ACAP3	2162.7076716528	0.815720349742163	0.131313850132198	6.21199019692858	5.23176918242537e-10	1.2044114191903e-08
ACAT1	1355.8979783951	-0.163088854165036	0.0640620579055145	-2.54579480424398	0.0109029257399478	0.0261792574374117
ACAT2	772.67876623777	0.124804361006688	0.103203298675697	1.20930592925008	0.22654533377577	0.326798049460451
ACBD3	991.868689360355	0.104506480454275	0.0644624534737741	1.62119923804626	0.104974916143643	0.17535471780859
ACBD4	249.087757030069	-0.337545072469135	0.0972800372674334	-3.4698287742344	0.000520790251661025	0.00189171720579113
ACBD5	1039.23904080343	0.0353415898938643	0.0715422853542176	0.493995819659413	0.621309131784923	0.712176645745158
ACBD6	646.493398422152	0.0289546716199371	0.0612017463229823	0.47310204952541	0.636140374643379	0.724026865235525
ACBD7	291.336843755398	0.0472838597443582	0.196982821550262	0.240040524205271	0.810298841046633	0.863755222416137
ACCN1	31.0559319018586	0.0463701303396864	0.340569365336603	0.136154731045337	0.891698961211961	0.924656294668506
ACCN2	1371.06598838232	0.527152491958673	0.15267629171178	3.45274623877965	0.000554910754272957	0.00200070469223032
ACCN3	88.6311827374093	0.677224555623097	0.183857131883278	3.68342826131451	0.000230118066727241	0.000931811270992701
ACCN4	845.02881799743	0.432678033399047	0.275398703507825	1.57109684209807	0.116160156022001	0.190430651403798
ACCN5	0.0591408983140572	0.0015183235076244	2.08245287832095	0.000729103416183227	0.99941825969254	NA
ACCS	161.872002638001	-0.266768465134387	0.150690582312737	-1.77030615344459	0.0766761535509043	0.135401806378229
ACCSL	0.0118862328377878	0.00320880629002841	2.90284728369466	0.00110539962196851	0.999118018887731	NA
ACD	497.831956721572	0.0421367860777423	0.0637034193754994	0.66145250115017	0.508322166223427	0.612383831548908
ACE	579.471207209139	0.232954689625131	0.149682870302417	1.55632163623314	0.119631629012775	0.195285033690274
ACE2	2.88828045573145	0.0442345488089741	0.279792370957549	0.158097766059838	0.87437976090068	0.912114015083401
ACER1	0.199667818257535	-0.248182515028985	0.841610939863004	-0.294889839561001	0.768078033856854	NA
ACER2	28.5143705329489	0.322920247239985	0.123401381046329	2.61682847065341	0.00887509276688721	0.0219938911836433
ACER3	588.616724804211	0.00930478759978016	0.0675384186321487	0.13777029116508	0.890421964635868	0.923811504096657
ACHE	359.008172341991	0.36278175957556	0.159575733022374	2.27341433878731	0.0230012228677057	0.049438746510436
ACIN1	2229.57723162298	0.417815398955732	0.0774201929278033	5.396723815263	6.78687359587214e-08	8.04179536073413e-07
ACLY	4180.1117356143	0.165275503653666	0.0682486959555918	2.42166537161688	0.0154495697340548	0.035259525646858
ACMSD	4.32555924693233	-0.728406661465535	0.607968720854686	-1.19809890949906	0.230878513347688	0.331803184809319
ACN9	501.941035710194	-0.705561174111959	0.144015452698563	-4.8992046401351	9.62253825692016e-07	7.91998755205731e-06
ACO1	950.39132721475	-0.00822884284324929	0.0765141142796158	-0.107546730700921	0.914355254531931	0.940387170937804
ACO2	3656.40473715593	0.178462098474022	0.0824318127607475	2.16496632182524	0.0303902644806166	0.0624401366867826
ACOT1	245.218483316981	-0.399166078429295	0.110154597061624	-3.62368969681754	0.000290430016495648	0.00113471505901754
ACOT11	129.389922843647	-0.0955063984755724	0.159562948985485	-0.598549970922511	0.549473026389971	0.649685924168129
ACOT12	3.58132254780347	-0.322031949147911	0.385692436687873	-0.834944941916296	0.403748709021655	0.515367789271449
ACOT13	743.733194230637	-0.350374709356079	0.0725580220704469	-4.82889002977366	1.37296200168041e-06	1.08438070435751e-05
ACOT2	199.588205177193	-0.261119574172394	0.0955419839545972	-2.73303487497686	0.00627536872718302	0.0163464993032531
ACOT4	30.5747261802605	-0.545987221635795	0.159073826782877	-3.43228821911114	0.000598511125796837	0.00213352310928252
ACOT6	3.63193541460116	-0.645306226490463	0.219095324576818	-2.94532175771834	0.00322618971768006	0.00925946311566521
ACOT7	905.197191203224	0.0386692955682527	0.115686200756733	0.334260225638901	0.738183201306218	0.807949662676293
ACOT8	578.384885568885	-0.446721107078485	0.0636515077706088	-7.01823291741031	2.24691761731621e-12	1.3162399488539e-10
ACOT9	580.362710177871	-0.303176208701347	0.0741699093345111	-4.08759039105741	4.35876866153224e-05	0.000222693453434647
ACOX1	1720.06037543505	0.040759253807527	0.0579696723010302	0.703113407229018	0.481985077477727	0.588420313173541
ACOX2	202.664069329272	-0.251637641816866	0.156304725022236	-1.60991705005123	0.107415966269959	0.178654436790068
ACOX3	379.083598195511	-0.0732862395662988	0.056718559730196	-1.29210332411319	0.196321364891798	0.292805061056071
ACOXL	1.13376854343162	0.212478259525764	0.270048628499704	0.786814807045008	0.431390284286653	0.540856847970524
ACP1	1580.26331005084	-0.249216316042443	0.0555415164762646	-4.48702757601054	7.22237295798647e-06	4.61165937306072e-05
ACP2	1435.93189407431	-0.0788748101050833	0.0613528117331251	-1.28559405636006	0.19858477214239	0.295519118097537
ACP5	161.368875870555	-0.73807157391096	0.209595201880484	-3.52141445648086	0.000429251138259422	0.00159431071260996
ACP6	282.507181249856	-0.0772665603668567	0.123969612835996	-0.623270159511393	0.533107003744731	0.634926910950016
ACPL2	1312.55949931062	0.0971825149951666	0.103132625074626	0.942306228750076	0.346035880098644	0.457278952729371
ACPP	34.2957684060365	-0.817747401564019	0.236788111835597	-3.45349855288252	0.000553365272496136	0.00199669911537838
ACPT	0.0243468827623322	-0.0671656702229865	2.90284728369466	-0.0231378586811153	0.981540306901429	NA
ACR	1.68048865759868	0.563542913482159	0.249146706092113	2.26189188820265	0.0237040836765362	0.0506648729306902
ACRBP	30.7299704953595	-0.0429904339129562	0.142155901746238	-0.302417510527972	0.762333807827423	0.827322213389831
ACRC	39.8996151168912	0.271833783554163	0.110825008544122	2.4528198745497	0.0141741294923547	0.0327602550816741
ACRV1	10.1057685542765	0.90459145317951	0.305474736059304	2.96126437442569	0.00306378823554353	0.00886551369718662
ACSBG1	766.726351091505	-0.2176590190818	0.189039267286519	-1.15139580366603	0.249569439418144	0.352490127895697
ACSBG2	1.8961006301284	0.278875873620906	0.249967244708959	1.11564966820195	0.264572122835335	0.369558451034615
ACSF2	358.393849854505	-0.423241985703334	0.112722896507088	-3.75471176502923	0.00017354106894958	0.000729026532116154
ACSF3	328.116881601363	0.0402038847283095	0.0545289696308469	0.737294047558277	0.460943551255168	0.568443312471573
ACSL1	1300.27420788368	-0.14798913996672	0.143086070838126	-1.03426657186038	0.301011559736225	0.408866456971018
ACSL3	2596.91675273809	-0.0400529251492143	0.108502680935073	-0.369142262698389	0.712021688924402	0.786596108705476
ACSL4	947.198410771538	-0.276492676386459	0.0997004472453059	-2.7732340628941	0.0055502184077968	0.0147764808061906
ACSL5	226.410317696926	-0.202665740455176	0.110614531461593	-1.83218007414826	0.0669245965195111	0.120901910540485
ACSL6	262.195889679484	0.0750321641769435	0.173099537521433	0.433462534050115	0.664678778900434	0.748736809254331
ACSM1	0.281141196507599	-0.6708582119284	0.700769462472034	-0.957316561086839	0.338407498808465	0.449477138742351
ACSM2A	0	NA	NA	NA	NA	NA
ACSM2B	0	NA	NA	NA	NA	NA
ACSM3	2.88135334421016	-0.018374653422362	0.294291156193036	-0.062436988117677	0.950214840148445	0.965188573014947
ACSM4	0.0115527176403968	-0.066741874951023	2.90284728369466	-0.0229918657195344	0.981656761451033	NA
ACSM5	126.231610747086	0.293019077595671	0.19164643970425	1.52895654126348	0.126275217891894	0.204220640158977
ACSS1	961.937642072616	0.180842097753879	0.124249629905782	1.45547393494058	0.145538101046367	0.229451846166202
ACSS2	694.634572713301	-0.285581447601888	0.068277629249156	-4.18265031669093	2.88130389321962e-05	0.000154494243338287
ACSS3	585.103091174881	-0.282755716587676	0.188447680978989	-1.50044678246373	0.133498708932326	0.214035908125074
ACTA1	5.55473617106612	0.132034640444635	0.250444720516268	0.527200733848405	0.598054199119626	0.691933010612928
ACTA2	2289.64630689548	-0.0979985398387447	0.179587643838519	-0.545686427774855	0.585281502956067	0.680878617579528
ACTB	134822.855790639	-0.102884618465672	0.0683974530763133	-1.50421709929579	0.132525476360797	0.212722078442751
ACTBL2	0.265970307100236	-0.775149169957206	1.44844995646695	-0.535157715664506	0.592540802782794	NA
ACTC1	46.8650215192767	0.249725687556093	0.261251943407359	0.955880688576185	0.339132516560652	0.450158428734128
ACTG1	68374.6262243579	-0.0404691426495481	0.0674186430794719	-0.60026634771993	0.548328742458674	0.648631461183766
ACTG2	156.411965077536	-0.0632423388163115	0.225259787920261	-0.28075290046308	0.778899931114888	0.840094540072577
ACTL6A	1098.00215393296	-0.349830878028861	0.0856486614697963	-4.08448739332871	4.41742244888683e-05	0.000224987044238971
ACTL6B	158.595629715809	0.790479936316843	0.333951228600513	2.36705203819582	0.0179304114970442	0.0400224054068316
ACTL7A	0	NA	NA	NA	NA	NA
ACTL7B	0.132815359647173	-0.0709728597705122	1.05356172476526	-0.0673646907458841	0.946291378014352	NA
ACTL8	0.756428002354404	0.555097119261261	0.45286872553331	1.22573515891954	0.220298354820075	0.320175013179589
ACTL9	0	NA	NA	NA	NA	NA
ACTN1	5647.85447415305	-0.0157481117070556	0.142079446881823	-0.110840181691827	0.911743081266012	0.938514542584166
ACTN2	477.587118779814	0.45192954433029	0.154224943813809	2.9303271776574	0.00338605283250316	0.00964287793186648
ACTN3	0.387405276595506	0.852387659511389	0.523490677985523	1.62827667302791	0.103466233408986	0.173093538369225
ACTN4	6225.5090981685	0.184111899228036	0.0842021399750681	2.18654655668551	0.0287756424371583	0.0596474358678948
ACTR10	1130.36069875884	-0.393664379679214	0.0754375509773204	-5.21841409986342	1.80461638541397e-07	1.8471383651272e-06
ACTR1A	2646.55252626865	0.158028236653839	0.0654069986543219	2.41607534216673	0.0156888146777461	0.035728459309179
ACTR1B	1582.76781249891	-0.20325010312873	0.0575570883008494	-3.53127840773229	0.000413556211425457	0.00154655747687158
ACTR2	4707.61079427602	0.0193290553024295	0.0544710232677104	0.354850233075895	0.722701793474473	0.795145388460968
ACTR3	3971.80580000029	-0.208650735999811	0.0609996602019821	-3.42052292273312	0.000625008682150423	0.0022178682201644
ACTR3B	385.565610075214	0.138001651002583	0.0912189025479154	1.51286243473598	0.13031460564754	0.209772455063136
ACTR3C	11.0670656782991	-0.705939854576391	0.2207423875042	-3.19802581895585	0.00138371890938451	0.00444689079098837
ACTR5	219.18097883953	-0.113145573457705	0.0637775254976387	-1.77406653166396	0.0760521459721065	0.134485918698364
ACTR6	631.011225165599	-0.282272936316134	0.061240049799193	-4.60928652477768	4.04053169734808e-06	2.77771108735122e-05
ACTR8	544.408124608792	0.154877943489721	0.047511620659448	3.25979079096983	0.00111494421897963	0.00368587441803854
ACTRT1	0.0182955347589071	0.107922930515625	2.90284728369466	0.0371783011534329	0.970342839820159	NA
ACTRT2	0	NA	NA	NA	NA	NA
ACVR1	740.412250108789	-0.00597848351843736	0.0752064041003542	-0.0794943408071973	0.936639432751353	0.955446600034051
ACVR1B	885.713779966408	0.139956076964276	0.0651759742437629	2.14735688400805	0.031764880402336	0.0647859315600066
ACVR1C	30.8919184766438	0.611993250388456	0.255624684239474	2.39410858231175	0.0166608156833313	0.0376464517212
ACVR2A	302.670795740244	0.136053172552698	0.0787027994552861	1.72869546565488	0.0838636133168462	0.145998404304458
ACVR2B	267.100952999102	0.849499572533029	0.121287687084537	7.004005047445	2.48747145614242e-12	1.42922321620656e-10
ACVRL1	519.728055834987	-0.181594386081859	0.122988210598933	-1.47651864514105	0.139804713662115	0.222342409842542
ACY1	483.479118370893	-0.408834086982598	0.0845102818881986	-4.83768457338077	1.31360383701317e-06	1.04437893036449e-05
ACY3	54.811520227106	-0.0608964281355039	0.245870606959641	-0.247676730815977	0.804384537126624	0.858774206926994
ACYP1	108.396534031738	-0.0875740502692249	0.104801158245413	-0.835621015410463	0.403368142266058	0.514992944122709
ACYP2	659.351679950286	-0.719049083568326	0.118671100864945	-6.05917597736496	1.3682064251584e-09	2.74006952673147e-08
ADA	168.014216552566	-0.644565259786892	0.115351603029431	-5.58783096947892	2.29923272380585e-08	3.16126921291471e-07
ADAD1	0	NA	NA	NA	NA	NA
ADAD2	15.4614493885401	-0.501470820343295	0.298019644699311	-1.68267706261196	0.0924376244195866	0.158082753666969
ADAL	236.185613483922	-0.229440427054579	0.0772850874055898	-2.96875418993166	0.00299009682243834	0.00867600859224444
ADAM10	1133.74845985592	0.080073924935227	0.0848206356197607	0.944038256140728	0.345150099226345	0.456578108458006
ADAM11	127.426189541577	0.441909594365053	0.176635204816286	2.50182060153111	0.0123556516129639	0.0291109706023246
ADAM12	784.215083471191	-0.24592464789903	0.195478076825407	-1.25806766616944	0.208367285696577	0.306547075922542
ADAM15	1468.72492141151	0.064309530217007	0.0808252611668731	0.795661273326819	0.426228941895607	0.536596237841884
ADAM17	934.282407163798	0.0528219048977989	0.0668385836893041	0.790290607343492	0.429358070924639	0.539103228898186
ADAM18	0	NA	NA	NA	NA	NA
ADAM19	671.645036592794	-0.182188880318119	0.202368879796412	-0.900281112893472	0.367970669629393	0.479423295789239
ADAM2	0	NA	NA	NA	NA	NA
ADAM20	1.51713469242005	0.599058246695868	0.233788004183503	2.5623994215959	0.0103951691611505	0.0251404153864015
ADAM21	11.5383820218802	-0.151840366132733	0.145917583198023	-1.04058991935654	0.298065911735634	0.405784811253115
ADAM21P1	1.61744095141887	-0.146433951181376	0.241040441096737	-0.607507812859535	0.543513959300377	0.644164692504151
ADAM22	237.839176309197	0.683911400703282	0.128705974263354	5.3137502327894	1.07391791733512e-07	1.17980084455436e-06
ADAM23	499.804882915925	0.493058836870581	0.111109137239348	4.43760836526388	9.0963929803119e-06	5.62549970281737e-05
ADAM28	262.940058999079	-0.285321277203199	0.157068344699152	-1.8165422049217	0.0692872399124101	0.124531453386446
ADAM29	1.26485920393877	1.88105926956861	0.76178999838912	2.46926222915278	0.0135391961879823	0.0314992114158697
ADAM30	0	NA	NA	NA	NA	NA
ADAM32	9.4178963547815	-0.146346375652358	0.236336326930308	-0.619229288841039	0.53576531964185	0.637417538266673
ADAM33	347.388185566243	-0.523757696293874	0.246783551510155	-2.12233632707211	0.0338095049750644	0.0681877467165593
ADAM3A	0	NA	NA	NA	NA	NA
ADAM5P	0.00584153713830131	0.0383960445465356	2.90284728369466	0.0132270287735103	0.989446665682404	NA
ADAM6	666.514843332732	-1.70049191912662	0.3644484236086	-4.66593297973177	3.07219833143178e-06	2.18813523930571e-05
ADAM7	0.012445290994106	0.0731594875310794	2.90284728369466	0.0252026649634713	0.979893311299146	NA
ADAM8	257.567804622462	-0.16156447447212	0.218575696645572	-0.739169436271325	0.459804117446633	0.567583035771861
ADAM9	4234.57736082293	-0.120837028708309	0.117687138770887	-1.02676494619819	0.304531159148663	0.412805333996348
ADAMDEC1	94.3607457052207	-0.0552861338838934	0.288317342629214	-0.191754451465632	0.847934551232714	0.892804387451359
ADAMTS1	983.378743911936	0.113477048447128	0.190620918621161	0.595302180201177	0.551641498844677	0.651436122872327
ADAMTS10	324.664222332337	0.451512175646318	0.128071058430604	3.5254817222501	0.000422713345908257	0.0015758865698205
ADAMTS12	51.3765543505553	0.0948277978570349	0.265085991589114	0.357724666205746	0.720549372042155	0.793725340365436
ADAMTS13	135.122513696583	0.488842413707617	0.155509460757792	3.14348986438193	0.00166946197179303	0.00524338178496784
ADAMTS14	203.615945712807	0.0763755262494248	0.254380060334825	0.300241796266957	0.763992726013049	0.82843805755916
ADAMTS15	74.1830904221383	0.925984146496447	0.232480864488138	3.98305533031814	6.80349077864225e-05	0.00032601646193206
ADAMTS16	17.1672301966475	0.424185810368538	0.298083879740379	1.423041765083	0.15472404835498	0.241499504045822
ADAMTS17	46.0906910817645	0.915296003710134	0.21675235146989	4.222773121044	2.41314703001388e-05	0.000131828785503553
ADAMTS18	48.6381039788423	-0.150973080209036	0.238940763460361	-0.631843131421489	0.527489386632783	0.629403471948246
ADAMTS19	8.46601515095885	0.963509603451797	0.371504418881498	2.59353470505861	0.00949949511772619	0.0232750572475733
ADAMTS2	82.5689220578821	0.319768184605075	0.258271077494053	1.23811070022906	0.215675016852495	0.31470528867156
ADAMTS20	2.33087954837877	1.56361665317454	0.569413499622663	2.74601261510433	0.00603244439811219	0.0158260364778482
ADAMTS3	199.897471157647	-0.675221745411089	0.254967974683065	-2.64826100709478	0.00809070328860732	0.0203211016027789
ADAMTS4	628.839631274473	0.181089157391802	0.175263938638214	1.03323683581945	0.301493078468862	0.409427737158047
ADAMTS5	125.371557936906	0.206212143636564	0.168041689703843	1.22714871529793	0.219766700853587	0.319584824589278
ADAMTS6	133.607422993285	0.537760621729249	0.1522355065123	3.53242573989005	0.000411765855565493	0.00154146485147582
ADAMTS7	182.974718474258	0.634120275708766	0.199118892757398	3.18463138744632	0.00144938499019698	0.00462979390119049
ADAMTS8	93.870550736468	0.0735417419280639	0.206881419738959	0.355477751558637	0.722231709650613	0.79479960019316
ADAMTS9	836.900965604893	0.255883916069548	0.164612206885607	1.55446501150044	0.120073536304836	0.195953037831776
ADAMTSL1	141.99897175386	0.21097677839433	0.283415734741938	0.744407428848061	0.456630026032047	0.564750318971208
ADAMTSL2	308.618507911856	0.428573751931246	0.128066210304117	3.3465013988742	0.000818382666384862	0.00280873928860026
ADAMTSL3	26.2026649603418	0.316303303104741	0.169572780867594	1.86529525249525	0.0621400302473898	0.113766293797115
ADAMTSL4	244.013998676176	-0.172880243554751	0.173186316339024	-0.998232696492752	0.318166535044799	0.427579308891643
ADAMTSL5	7.2206255592155	-0.692260258389698	0.290221396391314	-2.38528332851208	0.0170659720954028	0.0384123206713045
ADAP1	325.812040022509	0.166602082811041	0.183290396932084	0.908951508642178	0.363375722824711	0.47488910684395
ADAP2	520.50378198812	-0.259476515005776	0.119517129711487	-2.17104038251378	0.0299281199379168	0.0616526127105951
ADAR	6159.110832742	0.37008568365365	0.0684916755338294	5.4033673547796	6.54013242412101e-08	7.78925440499286e-07
ADARB1	293.825603915304	0.502309167572374	0.121271463346536	4.142022811558	3.44256093353866e-05	0.000180920560574983
ADARB2	31.9162166830821	0.65600772532585	0.270510093241799	2.42507670403067	0.0153051526330131	0.0349876528476048
ADAT1	235.758867320754	0.112553567343823	0.0774311441386387	1.45359556023476	0.146058468554903	0.23009070589448
ADAT2	115.41250910362	0.16766836306146	0.105088010951015	1.59550420208844	0.110599531077862	0.18320180223858
ADAT3	57.2953544781052	0.4053398696694	0.107604846072349	3.76692950610111	0.000165267641804371	0.000699170376431383
ADC	382.757604164126	-0.0143424305392383	0.105929960475178	-0.135395411032926	0.892299252190016	0.925225423857544
ADCK1	241.112155842034	0.151549333940868	0.0730504875187796	2.0745834708072	0.0380251553342322	0.0752862536100717
ADCK2	1127.27276075575	-0.246451223117305	0.07484922418983	-3.29263563897822	0.000992530093863318	0.003328297819884
ADCK4	959.31323141069	-0.224381014310831	0.0702940602067583	-3.19203377427413	0.0014127481234489	0.00452401393377938
ADCK5	107.411910959314	0.0342904669624212	0.0889856137022678	0.385348434828486	0.699979281161119	0.777255334181375
ADCY1	594.804219280747	0.871647559016613	0.189330076318051	4.60385151671492	4.14748218821747e-06	2.84037774839691e-05
ADCY10	1.75299144064097	0.372663859046466	0.310552599629952	1.20000238120861	0.230138415649726	0.3307981772515
ADCY2	1604.6061028032	0.366401541640824	0.194362176269596	1.88514837955198	0.0594098078430437	0.109555120916715
ADCY3	1026.02971819525	0.181762669413836	0.0680975346386207	2.66915198000063	0.00760430329524301	0.0193048828997248
ADCY4	84.571004875808	0.196131262180692	0.140218471085505	1.39875481926409	0.161886519079876	0.25028947379062
ADCY5	174.449579543256	1.10854898918426	0.202897480418852	5.46359169614047	4.6659607213756e-08	5.79507165837146e-07
ADCY6	1114.55443975354	0.283752640155611	0.0835751590632627	3.39517918166118	0.000685836994695158	0.00240477529978509
ADCY7	615.406411327227	0.247301507823448	0.108599074080395	2.27719720372914	0.0227744520521867	0.0490099013649067
ADCY8	627.011091620007	0.594958394110839	0.190727941470299	3.11940866935582	0.00181214429994106	0.00562860156997238
ADCY9	526.598854247277	0.450250872385671	0.0957916988420991	4.70031200853693	2.59764294126733e-06	1.88295085271067e-05
ADCYAP1	39.2698626609822	-0.177834237997701	0.23065212924085	-0.7710062707117	0.440703214747	0.54928315295655
ADCYAP1R1	629.088039736275	0.47264090099584	0.204019307954425	2.31664789835195	0.0205229198990227	0.0448298544229351
ADD1	6859.38173888969	0.18238487076527	0.0467000596031676	3.90545263357434	9.40491796463042e-05	0.000429284377350034
ADD2	740.11736547905	0.687763511772322	0.141980074952617	4.84408472105575	1.27196653390342e-06	1.01531496430178e-05
ADD3	2908.77552862113	-0.0915097754191695	0.114652988555449	-0.798145574503824	0.424786016722316	0.53515598772218
ADH1A	0.00595801506705162	-0.0315546366945158	2.90284728369466	-0.0108702365679926	0.991326976874149	NA
ADH1B	6.23020440687572	-0.971238487767136	0.449274984969584	-2.16179070782872	0.0306343120522221	0.0628697327338996
ADH1C	0.1371303119332	-0.176111813904486	1.05727282443754	-0.166571777722724	0.867707001526832	NA
ADH4	1.15074632167542	-2.15033859246428	0.616464499899864	-3.4881791130123	0.000486322176989324	0.0017827187180954
ADH5	3293.33687643727	-0.394003186406256	0.0616872876243058	-6.38710505162513	1.69055508803803e-10	4.59953747402056e-09
ADH6	0.295021704718586	0.902497142284699	0.615756135924997	1.46567299882275	0.142737393520979	0.226046960644706
ADH7	0.77249477282531	-1.31531679013993	0.562935831671202	-2.33653058863763	0.0194636052949613	0.0429067758794538
ADHFE1	190.169429206699	0.0635565845365739	0.147059066064397	0.432184062074369	0.665607642091456	0.749454535147305
ADI1	1803.64555672475	-0.524484823827554	0.0910485780501982	-5.76049439825834	8.3867913807747e-09	1.30587061637967e-07
ADIG	4.48254532684423	-1.20439015253656	0.319041858320628	-3.77502237128452	0.000159993304351865	0.000680056626202773
ADIPOQ	0.170381981978559	0.382227260182181	0.961382954036342	0.397580650434262	0.690939325957187	NA
ADIPOR1	2243.96428326099	-0.191419059457368	0.0708335098915985	-2.70237998583312	0.00688450333203052	0.0176923275111799
ADIPOR2	1907.72597605955	0.135454113133394	0.0699445526655451	1.93659274341344	0.0527951457076281	0.0995771264190858
ADK	479.743179389527	-0.340291765174898	0.0867976451986445	-3.92051840111685	8.83586885070554e-05	0.000407562298646596
ADM	1257.48027238488	0.0408563409019224	0.21469823579911	0.190296584179439	0.849076730176948	0.893545316607305
ADM2	29.0544664854641	0.531289047730931	0.259087157837166	2.05061899696643	0.0403040649008657	0.0792162079975049
ADNP	2299.22506515529	0.152702781571359	0.0585539517975167	2.60789881611091	0.00910998787922747	0.022489227456421
ADNP2	699.299668232581	0.214176634111107	0.0584573933727809	3.66380746307502	0.000248493605936104	0.000996634480186195
ADO	796.208115282106	0.212420580531346	0.0660192998244607	3.21755276254297	0.00129289244687763	0.0041864201952912
ADORA1	1948.3821542974	-0.281559570852999	0.164643542619597	-1.71011608699123	0.0872444085734101	0.150633971177439
ADORA2A	94.1184447386058	0.155244087259377	0.102153165507964	1.51971881133016	0.128581661685841	0.207484307201271
ADORA2B	155.973659553524	-0.0884015626161271	0.143421345516417	-0.616376609059272	0.537645987622587	0.638852027843053
ADORA3	1517.1317248754	-0.562888242363114	0.152658983733746	-3.68722644809985	0.000226711597204234	0.00091931936056842
ADPGK	1102.23292261898	-0.39685513924395	0.0653137355723619	-6.07613598833693	1.23113016444995e-09	2.50459783681764e-08
ADPRH	294.505638666238	-0.0555682262223981	0.0967474046693396	-0.574363998830951	0.565721509522211	0.663402166617596
ADPRHL1	39.2671019268057	-0.195835097811884	0.145895133418107	-1.34230041279485	0.179498609647098	0.272237909882845
ADPRHL2	990.165966906402	-0.107160859233442	0.0581231004728442	-1.84368793752682	0.0652286319648701	0.118504062759493
ADRA1A	22.8337554487169	0.656335323047001	0.268718710150083	2.44246231563269	0.0145874524857103	0.033586063948664
ADRA1B	54.294903282133	-0.0330609042471027	0.18007088897408	-0.183599383750816	0.854327746598998	0.89718132524592
ADRA1D	81.6335608948006	0.225020025173039	0.255649030475231	0.880191193194612	0.378755743570642	0.490285992397208
ADRA2A	59.9479123553208	0.0140137035916435	0.235227816355905	0.059575027344727	0.952494108323809	0.966739321863275
ADRA2B	18.7323001113234	0.743734091100403	0.199904139571319	3.72045367692381	0.000198865217124233	0.000822159095347636
ADRA2C	17.8277837630738	0.706631498768703	0.245158998686249	2.88233963491195	0.00394734006345429	0.0110051534892383
ADRB1	61.9601179622857	0.286852113141336	0.16516249486905	1.73678723713133	0.082424732655127	0.144041044803207
ADRB2	57.5136170387501	-0.15765618712508	0.160683804243324	-0.981157919850717	0.326514871741916	0.4367130338693
ADRB3	0.941175466846232	-0.504753493462803	0.410064002549109	-1.23091393130114	0.218355056570647	0.317915911380061
ADRBK1	1689.31813183803	0.166955891246389	0.0673021448757154	2.48069198321541	0.0131127628952802	0.030645864575532
ADRBK2	344.604871575779	0.446902184522806	0.103648808099168	4.31169632066798	1.62006839900406e-05	9.28171713529435e-05
ADRM1	1804.08854684449	-0.152255682694616	0.055582655936205	-2.73926605575249	0.00615765206357803	0.0160995024246738
ADSL	1120.12376653143	-0.307420246646692	0.101873338625369	-3.01767126507168	0.00254725060315283	0.00756810752471508
ADSS	719.938692880063	-0.105807750574101	0.0562332913107368	-1.88158558938731	0.0598923043428104	0.110234694637305
ADSSL1	187.881541664727	0.00801742700506804	0.135287988302285	0.0592619278745875	0.952743484948225	0.966937857410207
AEBP1	9982.01840791243	0.100449357387037	0.18303876306079	0.548787348140435	0.583151393810491	0.678795771280768
AEBP2	540.8480141423	-0.164683125443543	0.072874406376122	-2.25982115852271	0.0238323526736644	0.0509027352117793
AEN	844.612592196804	-0.261970829393688	0.107556551947813	-2.43565663503975	0.0148647873188167	0.0341590001458727
AES	7982.82681993539	-0.198650100064971	0.0881017972930067	-2.25477920052307	0.0241471914581931	0.0514529728891167
AFAP1	1227.8494553867	0.434125027134714	0.0953432194454125	4.55328684787351	5.28141811113921e-06	3.50225012207698e-05
AFAP1L1	567.103147549396	0.00196533634856851	0.152214956536145	0.012911584993304	0.989698331909321	0.992789759095116
AFAP1L2	598.207367329358	0.820542741234714	0.167938348752749	4.8859759985063	1.02917736279607e-06	8.41305713296571e-06
AFARP1	3.2293838208548	0.645161096554053	0.177285818235405	3.6391015535004	0.00027359089954038	0.00108137554666686
AFF1	933.423076910357	0.254263554699587	0.0821289974021018	3.09590476862536	0.00196213367317127	0.00603299914144504
AFF2	66.999923561564	0.86942254985041	0.326953863957663	2.65915973381183	0.00783358135232487	0.0198067617774952
AFF3	333.040524960572	0.712442638425678	0.171809866645903	4.14669222632022	3.37312996987184e-05	0.000177635049423646
AFF4	2129.12212459278	0.326760350683808	0.0620264104817125	5.26808416199012	1.37854905797887e-07	1.45496178190136e-06
AFG3L1	277.359170847942	0.517223657834619	0.12535811742692	4.12596861257225	3.69177620209189e-05	0.000192554823719317
AFG3L2	972.050029555264	0.149667000601937	0.0662854513346936	2.25791629367094	0.0239508785909372	0.0510901954572314
AFM	0.00584309411335173	0.0383960445465356	2.90284728369466	0.0132270287735103	0.989446665682404	NA
AFMID	335.324798231267	-0.216867097978805	0.103529312012438	-2.09474103288498	0.0361940195047595	0.0722594634517755
AFP	7.85762971184766	-0.931500310782001	0.439419345847351	-2.11984365182136	0.0340192326686703	0.0685185217060552
AFTPH	673.832847613353	0.00592292207777625	0.051503902597489	0.114999481186208	0.908445533269669	0.936339845505216
AG2	739.045399040095	0.128950147954055	0.135865963980942	0.94909824488599	0.342570646979425	0.454034233567542
AGA	547.975435960104	-0.431581852904839	0.0888735488161151	-4.85613389646237	1.19699777153766e-06	9.62737384764455e-06
AGAP1	591.623708072143	0.477476913494165	0.0995741673722368	4.79518861261696	1.6252184204863e-06	1.24959076844915e-05
AGAP11	11.1376235216243	0.581119398112925	0.211138580871484	2.75231270246456	0.00591759856934795	0.0155792845368399
AGAP2	2754.62766293044	1.38798601494006	0.299061228896638	4.64114328714867	3.46486747670467e-06	2.4302721022253e-05
AGAP3	2174.94487112802	0.303881969530745	0.0746770602649539	4.06928136234304	4.71583699458944e-05	0.000238430172928582
AGAP4	130.405736583712	0.466441860241297	0.125606786225897	3.7135084357817	0.000204405648120577	0.000840955786666514
AGAP5	36.1375481665404	0.589403893144136	0.115767918638542	5.09125412355742	3.55702914402884e-07	3.32309673382933e-06
AGAP6	155.807910382597	0.363801369037263	0.119651577168631	3.04050625696758	0.00236180784214375	0.00709449678187961
AGAP7	19.1236603697062	0.242343615527329	0.167443304887287	1.44731744091208	0.147808036545305	0.23241931706136
AGAP8	50.4675459225668	0.566611349872378	0.161458392331283	3.50933352977896	0.000449231177590611	0.00166336699563301
AGBL1	0.0527412938769559	0.176604285046371	2.63270123094916	0.067081020425056	0.946517203363598	NA
AGBL2	24.2631120595561	-0.591660727584387	0.238620405187901	-2.47950600502285	0.0131564514704829	0.0307319941869288
AGBL3	20.0624708577828	-0.143676235466963	0.124251924553207	-1.1563300607504	0.247546176990512	0.35043060823342
AGBL4	29.1645094382685	0.0572326826706958	0.207601281589199	0.275685594195646	0.782789561178155	0.842965088102467
AGBL5	716.107354653238	-0.0335849992565586	0.0643811695726576	-0.52165873157455	0.601907963007867	0.694862149499458
AGER	96.203863917081	0.236099026124185	0.146552028183802	1.61102530650804	0.10717420679649	0.178335841155673
AGFG1	1971.59968827357	0.00590882192382153	0.0438011756864589	0.134900989099437	0.892690157512381	0.925470674624008
AGFG2	924.836747584875	0.00448068896594122	0.0956790630325715	0.0468304018029095	0.962648398473047	0.973857726170854
AGGF1	1115.66628133172	-0.00621154382078718	0.0567166575875021	-0.10951886244714	0.912790961686968	0.939378120456563
AGK	865.846285829551	-0.0129818852344689	0.0547036597885132	-0.237312919915366	0.812414039713971	0.865548228093368
AGL	563.808564470963	0.0401779049227359	0.0763869540880417	0.525978622952132	0.59890305985837	0.692603217059541
AGMAT	31.5270747492764	-0.577388739706578	0.161576499359575	-3.57346979291617	0.000352281899184279	0.0013442227348377
AGPAT1	3018.6923259598	0.17290232225814	0.0558534358997363	3.09564343666378	0.00196386362144258	0.00603728604581596
AGPAT2	327.574454186662	-0.438724959855983	0.130138194556743	-3.37122365459504	0.000748350763787009	0.00259713240755414
AGPAT3	2558.67624567147	0.130056488453133	0.0756280011630385	1.71968697378049	0.0854893569169951	0.148301398166802
AGPAT4	760.989865166828	0.583271495477239	0.104427880208169	5.58540012795941	2.33162751636629e-08	3.19360161876096e-07
AGPAT5	2889.45868236634	-0.0831651405983446	0.0772274342171637	-1.07688597247041	0.281531210633281	0.38779797003299
AGPAT6	1734.32888519268	0.263849182246339	0.0775853052404565	3.40076231483016	0.000671982286185868	0.00236264505078527
AGPAT9	30.1458118488387	-0.42303277504115	0.211928876751157	-1.99610728620936	0.0459222461170832	0.0886312163736449
AGPHD1	21.9196656276349	-0.689137328558264	0.141468134705099	-4.8713254754848	1.10852055437529e-06	8.99216673427387e-06
AGPS	947.477335700364	0.0433874883780883	0.0459669932656567	0.943883541116977	0.345229163603904	0.456631390407552
AGR2	0.196924498692931	-0.318134600952027	1.42906742122864	-0.222616929212837	0.823833659459483	NA
AGR3	6.57098062977156	-1.7713109502543	0.679617970180923	-2.60633330484589	0.00915173581049012	0.0225706002215928
AGRN	5338.30241965066	0.484665383294326	0.117212081433121	4.1349439184805	3.55041327184006e-05	0.000186044965853064
AGRP	1.02472108176182	-1.54121161849381	0.393739043111131	-3.91429716066742	9.06679193869686e-05	0.000415962209758991
AGT	12651.4138590445	-0.324369162028994	0.158871733675613	-2.04170467914259	0.0411808343503785	0.0807191419804743
AGTPBP1	435.480606631131	0.35270267585777	0.0956441061967035	3.68765718958568	0.000226328281650772	0.000918386240344647
AGTR1	27.2415914392315	-0.294676644066675	0.283510060351782	-1.03938690465177	0.298624831899303	0.406361151398084
AGTR2	0.119698603210795	0.209246692565516	2.90284728369466	0.0720832589922514	0.942535648953302	NA
AGTRAP	961.817912969492	-0.411630778849917	0.100162164627296	-4.1096434005954	3.96270574548783e-05	0.000204948836332844
AGXT	2.89206503391636	0.403012909595077	0.58623310336723	0.687461876990969	0.491791716553109	0.597230213416916
AGXT2	0.0119430841890088	-0.066741874951023	2.90284728369466	-0.0229918657195344	0.981656761451033	NA
AGXT2L1	414.657997414056	-0.00275154476791717	0.283434120503584	-0.0097078811930915	0.992254353140226	0.994466244252888
AGXT2L2	521.045856466291	-0.163770563750574	0.0765397074822831	-2.13968107715178	0.0323805493255077	0.0658373995556733
AHCTF1	837.526149238489	0.286036724730855	0.0858632483461558	3.33130565451827	0.000864396339520698	0.00294251443686167
AHCY	3730.24541438176	-0.594009148535156	0.0807337330038726	-7.35763263302421	1.87200374145134e-13	1.71765894317657e-11
AHCYL1	10009.6703079617	0.116024956474047	0.143496612568087	0.80855536864325	0.418770945661925	0.529767634129436
AHCYL2	2249.63175932007	0.0475817027764619	0.120117065556405	0.396127748842801	0.692010788523808	0.771091198866264
AHDC1	1294.77374690908	0.617004858935542	0.107986964758504	5.71369757743796	1.10547386694739e-08	1.65950267305358e-07
AHI1	330.202045000481	0.1200975615046	0.0884518500823136	1.35777331274402	0.174535625557032	0.265823906674937
AHNAK	4227.67424474802	0.228069367368515	0.158007351801397	1.44340984624045	0.148905052055976	0.233878467788181
AHNAK2	539.500870735857	-0.0733023507390325	0.259237200993754	-0.282761696461915	0.777359518300199	0.839036944971239
AHR	1009.79195437368	-0.629854089517934	0.176911193136033	-3.56028399533555	0.000370453932255676	0.00140435150035541
AHRR	55.9253278896525	0.55097293451666	0.146258199386654	3.76712510359906	0.000165138258990992	0.000698951859188985
AHSA1	1562.7026271133	-0.0356500723844331	0.057883781989635	-0.615890516463087	0.537966781083004	0.639139338600147
AHSA2	548.945674941898	0.298227558993926	0.161419119736681	1.84753553036603	0.0646695635852607	0.117678582567776
AHSG	2.6061706542943	0.254069361159544	0.292572852028269	0.868396911737375	0.385177084917341	0.49703424706505
AHSP	0.820524995500256	-0.794001855398715	0.570207681006649	-1.3924783580554	0.163777590753725	0.252626828382794
AICDA	0.10209222710386	-0.104888833363072	1.11731822622502	-0.0938755234642956	0.925208037402993	NA
AIDA	1076.68771807938	-0.197443805898635	0.0516458505825405	-3.8230332867319	0.000131819976083635	0.000574285477201572
AIF1	1232.55038625151	-0.837522295505058	0.154631758865159	-5.41623727009009	6.08663192531006e-08	7.32677299496494e-07
AIF1L	3551.9786808294	-0.0846700306595864	0.144520441515341	-0.585868890046247	0.557963624784116	0.656788704550173
AIFM1	579.529454027758	0.0325649132081594	0.0550335107135311	0.591728799161502	0.554032208388215	0.65319734701754
AIFM2	211.353550727967	-0.079659471004267	0.11051532466429	-0.720800226088523	0.471032436301836	0.578425901976935
AIFM3	124.0290413354	-0.713429225670712	0.28880964309596	-2.47024032169753	0.0135022309683177	0.0314457552103375
AIG1	1030.25914524253	-0.570388311640589	0.0846352016293377	-6.73937440521051	1.59070025293481e-11	6.59150998819806e-10
AIM1	255.170099113488	0.228071642273363	0.241821737734307	0.943139539109374	0.345609533946874	0.4568024939199
AIM1L	0.390250565797089	0.730049680253238	0.715257533288677	1.02068086846503	0.307405661536768	0.415980693534781
AIM2	24.3115971816299	0.171240034985281	0.251339636928961	0.681309311486278	0.49567579263248	0.600892042784127
AIMP1	1057.32664908774	-0.255868717638648	0.0476900322138276	-5.36524522548884	8.08393130974744e-08	9.29548725540268e-07
AIMP2	700.497487755676	-0.217857803880067	0.0709656488468698	-3.0699050515294	0.00214126832245405	0.00651238192644426
AIP	1118.8305811994	-0.310617104768541	0.0709993221727765	-4.37493056641662	1.21471136432651e-05	7.22399774340207e-05
AIPL1	0.363419412532492	-0.358832585679932	0.596655004844274	-0.601407149469208	0.547568837936621	0.647860393516591
AIRE	9.29665056089195	-0.242531430415077	0.29771950104944	-0.814630649185461	0.415283761136694	0.526355850326472
AJAP1	36.7346529948609	0.318505979075827	0.218814168845124	1.45560034232182	0.145503133361587	0.229448218631527
AK1	1442.70074172084	-0.461051833134717	0.139014764393586	-3.31656738150031	0.000911306092153964	0.00308172679192823
AK2	2385.88528285683	-0.324476843863306	0.074667281480579	-4.34563623355837	1.38872548800436e-05	8.10514370430962e-05
AK3	1696.51460948943	-0.255202365645667	0.0809436974847755	-3.15283800438778	0.00161691509372054	0.00510150895534564
AK3L1	570.103967231269	-0.285703922770619	0.145053502309148	-1.96964511867978	0.048879056868693	0.0934255456187241
AK5	353.440660442363	-0.0814954543803399	0.267057698364777	-0.305160476104398	0.760243933050504	0.825887861454318
AK7	19.8933488421955	-1.12741337072034	0.329945797960762	-3.41696538549163	0.000633233303722578	0.00224351216196746
AKAP1	931.910311143723	0.312140599428617	0.0700571044381431	4.45551670928994	8.36913767875129e-06	5.21693777373443e-05
AKAP10	461.186473912139	-0.0584705803674033	0.0558994563371819	-1.04599551048784	0.295563105183265	0.403171031827658
AKAP11	1344.23854888525	0.20888869114343	0.0784130120044626	2.66395443566868	0.00772280224164384	0.0195615317624962
AKAP12	3417.37045103135	0.258366329477391	0.186523500517707	1.3851677068052	0.166001192675057	0.255443265942348
AKAP13	1646.41782717501	0.329965322190649	0.0999884751649716	3.30003354532847	0.000966732722882264	0.0032496675305261
AKAP14	11.8397205512391	-2.09624639943928	0.594672101261248	-3.52504581094912	0.000423409562278829	0.00157717430986381
AKAP2	359.677092981683	0.259750846848635	0.155941113489932	1.66569829492339	0.0957735217732314	0.162704611332873
AKAP3	54.7435300086615	0.105026503179289	0.137951730776184	0.761327912222328	0.446461232865356	0.554461626396697
AKAP4	0.030701742097397	0.0375484540026092	2.90284728369466	0.0129350428503488	0.989679616810245	NA
AKAP5	90.6430115626382	0.238860183396245	0.142466693197331	1.6766036891542	0.093620004896898	0.15975921598015
AKAP6	940.044535667337	0.482266930650712	0.125875534952195	3.83129994906372	0.000127467993687421	0.000557712274672289
AKAP7	452.173328887659	-0.147978229747982	0.118484614388035	-1.24892358819986	0.211693023173756	0.310301355347366
AKAP8	633.567922383614	0.183732605706261	0.0540892278513371	3.3968428281366	0.00068168108379791	0.00239206880215056
AKAP8L	1002.6153126792	0.32678005196235	0.0706780496351719	4.62350126593947	3.7731643790844e-06	2.61288364241254e-05
AKAP9	628.510972396667	0.354790071458527	0.0864900951428995	4.10208904120571	4.0943664123997e-05	0.000211104029703544
AKD1	126.027703460885	0.0902750468441085	0.127862623104489	0.706031556777431	0.480168513165403	0.586680517750297
AKIRIN1	2082.36367501788	-0.121601318327512	0.0472667742292413	-2.57265955442088	0.0100920426021901	0.0245244344294922
AKIRIN2	1389.64955451171	-0.0506442975861171	0.067594384197364	-0.749238242014964	0.453713623478327	0.561774882539999
AKNA	570.9967530833	0.408058712912399	0.10951926880127	3.72590793728588	0.000194613430702169	0.000806620866040056
AKNAD1	39.3299801331633	0.414829957514392	0.243613934638532	1.70281703355724	0.0886023141618813	0.152641442464534
AKR1A1	1907.05281530081	-0.403723413239037	0.0726538642859468	-5.55680578324211	2.74756182765387e-08	3.67042177486338e-07
AKR1B1	3507.69669730218	-0.302723592633212	0.0685401599513604	-4.41673309265751	1.00203835791751e-05	6.11076901620495e-05
AKR1B10	4.23298856651983	-0.181311005092853	0.478744018599073	-0.378722235785661	0.704894139491765	0.780995471096806
AKR1B15	0.886085785754604	1.15482052516288	0.629971498816039	1.83313138345661	0.0667830349870178	0.120730408243519
AKR1C1	99.567516432853	-0.0796630228816061	0.251392200635076	-0.316887408123079	0.751329036887372	0.818903115114091
AKR1C2	44.7255072321453	-0.0861405280255133	0.264286607847017	-0.325936031065849	0.744472754103769	0.813195451075421
AKR1C3	263.077508977838	-0.0553455524051049	0.223770114869822	-0.247332189275151	0.804651149036507	0.858956862602988
AKR1C4	0.154741016937837	0.522970027392749	2.36180940320069	0.221427701441118	0.824759425069072	NA
AKR1CL1	0.0057269217203255	-0.0315546366945157	2.90284728369466	-0.0108702365679926	0.991326976874149	NA
AKR1D1	0.315967877121892	-0.0425676355848868	0.6983790064869	-0.0609520549579768	0.95139739261523	0.966062374162514
AKR1E2	2.83600822100202	0.106272584507496	0.241591983391455	0.439884564941464	0.660020715566973	0.744872580821802
AKR7A2	944.946451560541	-0.430167214646622	0.0712899112166553	-6.0340545710502	1.59896027676978e-09	3.12561974102476e-08
AKR7A3	17.4086946250207	-0.0437217369661514	0.171808569346814	-0.254479372783173	0.79912523781052	0.854783100980456
AKR7L	14.5653085006589	0.32222904480186	0.15449652263662	2.08567182809513	0.0370083600156044	0.0735748780146618
AKT1	3654.66922838356	0.135271574484524	0.0787594289958979	1.7175286338296	0.0858826272709273	0.148782696160327
AKT1S1	1161.58089067638	-0.0243668931740508	0.0614364977769708	-0.396619176804453	0.691648308981263	0.770812616268143
AKT2	2627.54736181102	-0.0174592020302794	0.083813836620523	-0.208309304695453	0.834987466906414	0.883162653934302
AKT3	835.553324418281	0.762648998445249	0.114795751148233	6.64352984162681	3.06258437285953e-11	1.1081995444971e-09
AKTIP	837.919539390218	-0.314315896005782	0.0788514041814969	-3.98618007210503	6.71455605094288e-05	0.000322356049172869
ALAD	1350.93468954131	0.0925174505503302	0.0752928843937829	1.22876751628298	0.219158983948286	0.318802488661812
ALAS1	1079.81680410934	0.054122814693638	0.0499273427130053	1.08403154970112	0.278350810450711	0.384415679246321
ALAS2	10.1366457608775	-0.518033528988041	0.399781821567192	-1.29579060637947	0.195047635242534	0.291230917328477
ALB	6.20531037688012	-0.112989443887126	0.290034525103947	-0.389572392619916	0.696852769858116	0.774934284945066
ALCAM	2185.97189522631	0.381159263494803	0.139127274143967	2.73964444311892	0.00615056819899296	0.0160889917804639
ALDH16A1	455.001221839907	0.0356585880728968	0.0843375287403694	0.422808073765959	0.67243529654036	0.754638151200114
ALDH18A1	1092.42385138943	0.272530053421564	0.0733639733794055	3.71476681084543	0.000203391167391317	0.00083702214058706
ALDH1A1	610.348132279412	-0.247439638945654	0.197387924467717	-1.25357029622206	0.209998233379944	0.308395249804419
ALDH1A2	54.184128164192	-0.654496477276773	0.179456141700972	-3.64711104938031	0.000265205326025633	0.00105448874270285
ALDH1A3	112.407952798088	-0.776359891159192	0.315394856471249	-2.46154899241347	0.0138338502543768	0.0320975310249918
ALDH1B1	542.264785096187	0.0475598086384618	0.0929603470289393	0.51161393173001	0.608921233142905	0.70103318973446
ALDH1L1	2434.17099666096	-0.219230969760052	0.194146180053129	-1.12920568254322	0.258811077123927	0.363295730591711
ALDH1L2	239.974309576752	0.594667881293815	0.128705633305138	4.62037182074202	3.83052938960373e-06	2.64852904815969e-05
ALDH2	2937.88822152055	-0.0961348858393508	0.10242001511638	-0.938633779052973	0.347918803557073	0.45938934831522
ALDH3A1	37.0903056212994	-0.0998569453482958	0.278455839069928	-0.358609629741752	0.719887141856564	0.793238794139357
ALDH3A2	2257.05587816451	-0.0896006594591419	0.0780914184236897	-1.14738163639195	0.251223927376511	0.354520645789327
ALDH3B1	313.107538885031	-0.227062179620497	0.13289613508568	-1.70856872153661	0.0875308666421908	0.151024608921445
ALDH3B2	0.0791634739312353	-0.0340903165188635	1.35876919534965	-0.0250891149398562	0.979983882470502	NA
ALDH4A1	1870.48406620748	0.0385924963708979	0.120746374206983	0.319616192406264	0.749259298002324	0.817281071800823
ALDH5A1	1058.3434591662	0.0807958837258984	0.112593335155719	0.717590287330558	0.473009948106053	0.580141233495142
ALDH6A1	664.06766683654	0.1847757869229	0.10713049705187	1.72477298255636	0.0845683925103956	0.147001543679389
ALDH7A1	1841.70210045514	-0.191217123379586	0.121472985501798	-1.5741534843297	0.115451970177563	0.189511521693436
ALDH8A1	18.9800705591688	0.681670434950489	0.177923295629472	3.83126016488632	0.000127488609940935	0.000557712274672289
ALDH9A1	3015.52319165751	-0.336417429297975	0.0692094048558206	-4.86086291305077	1.1687517062546e-06	9.4381817176842e-06
ALDOA	25741.3761444573	-0.1394454676393	0.0810108997092738	-1.72131735531555	0.0851932518485379	0.147873317367446
ALDOB	4.1553325093132	0.679741787426439	0.203892003339835	3.33383250099066	0.000856582235117371	0.00292033647703333
ALDOC	7949.84375330153	-0.00245542296469627	0.18994775642962	-0.0129268332032449	0.989686166613302	0.992789759095116
ALG1	585.830745885503	-0.291887368130701	0.0570753254819231	-5.11407277428752	3.1528579655849e-07	2.98583452622848e-06
ALG10	66.1590842812575	-0.172212160665907	0.067672000069898	-2.5448067219534	0.0109338239071173	0.0262388429604481
ALG10B	256.0940053107	-0.0628197377802516	0.0674556618995379	-0.931274499593664	0.351711589287849	0.46355303933695
ALG11	13.4636652712945	0.44505550196508	0.120735417406173	3.68620502191037	0.000227622998383749	0.00092259905407558
ALG12	386.560741867494	0.0126838545877942	0.0763887780317695	0.166043428296747	0.868122773672348	0.907851367199134
ALG13	557.636235504843	-0.220004503583136	0.0593946237729911	-3.70411477685258	0.000212130200966656	0.000868020371828063
ALG14	287.368042019302	-0.573423966712819	0.0814681500028429	-7.03862757031808	1.94142509283043e-12	1.17353064645657e-10
ALG1L	14.2376472987777	-0.631070349764605	0.240977258578346	-2.61879628595507	0.00882406254771052	0.0218915630925681
ALG1L2	0.0769339633863164	0.105809334972953	2.03281497498765	0.052050647144409	0.958488337492206	NA
ALG2	688.451689019802	-0.222399961342391	0.0611342337147659	-3.63789562457006	0.000274874769398113	0.00108549579553265
ALG3	746.847811690031	-0.211688625713835	0.0629718670932502	-3.36163806927246	0.000774816093190704	0.00267812658465147
ALG5	704.627387851871	-0.754608697940768	0.096804036808447	-7.7952193195617	6.42967049502741e-15	1.0908603224771e-12
ALG6	394.390033841126	-0.0739512709575871	0.0985903709426887	-0.750086141785343	0.453202825397608	0.561252122237442
ALG8	738.968742151877	-0.33262586099984	0.0486025548170486	-6.84379375224043	7.71229371095598e-12	3.57468788911939e-10
ALG9	651.158824639878	0.072884614031622	0.0506196764973483	1.43984748767488	0.149910552583369	0.235149705857768
ALK	115.685814727526	0.219658351278271	0.220471417379176	0.996312147349663	0.319098503474974	0.428546597453061
ALKBH1	256.253420695598	-0.173920351770323	0.0633298124248573	-2.74626349125358	0.00602783300064627	0.0158162457956847
ALKBH2	500.377834512154	-0.286570344554199	0.0903427003887769	-3.17203651563419	0.0015137397219516	0.00481228480812756
ALKBH3	321.655932576797	-0.304356526361445	0.0631589050293967	-4.81890124947203	1.44350974627266e-06	1.13165123264898e-05
ALKBH4	516.306729679108	-0.0709037032144321	0.063962675997636	-1.1085168359287	0.2676386722437	0.37311735516517
ALKBH5	2146.81813710309	0.0628188245276754	0.0598610303621218	1.04941101326958	0.293988991548955	0.401389160645036
ALKBH6	164.501176669796	-0.259743196803458	0.070585504098315	-3.67983766810923	0.000233382471543466	0.000942332817296296
ALKBH7	841.723897120158	-0.63895713882161	0.100759051513274	-6.34143661760685	2.27632406426537e-10	5.89876253195222e-09
ALKBH8	196.966291764476	0.189420408244946	0.0679912559524273	2.78595248155853	0.0053370694804009	0.0142851402791382
ALLC	1.01964175433985	0.267885005543874	0.474946940776562	0.564031437081938	0.57273273751285	0.669484923719928
ALMS1	372.407012440537	0.54282564659662	0.0922920387896508	5.88160857334414	4.06298287884074e-09	6.93909630513503e-08
ALMS1P	3.0719140849582	0.904005719063655	0.244493634851457	3.6974611613627	0.000217766524169206	0.000888254291371967
ALOX12	5.5065291354637	0.150059643309453	0.123430206674017	1.21574489221884	0.224082117263296	0.324233067572863
ALOX12B	1.21568956185731	-0.142784742395828	0.419186338993633	-0.340623558340715	0.733386991957554	0.803976328153895
ALOX12P2	10.7221147835765	-0.157548056037702	0.294875584252841	-0.534286541345563	0.593143302285997	0.68740405389917
ALOX15	1.37539042424013	0.433791516876473	0.571474246293561	0.759074480941067	0.447808003624704	0.555788760330344
ALOX15B	110.89486186627	-0.107577452703672	0.297342670474434	-0.361796214892478	0.717504320893764	0.791146395276116
ALOX5	552.172355238565	-0.368320349565893	0.161820644368826	-2.27610235395187	0.0228398842325327	0.0491448286716761
ALOX5AP	1708.96897245077	-0.618412805169301	0.163548703407641	-3.78121496706655	0.000156064837849507	0.000665445409632681
ALOXE3	3.14697121759985	0.122565482475228	0.307946358055664	0.398009196306432	0.690623406902223	0.769956688967179
ALPI	0	NA	NA	NA	NA	NA
ALPK1	249.090785194779	-0.170290472884975	0.160534784625928	-1.06076993395406	0.288794469070661	0.395799400378506
ALPK2	70.2282154352127	0.562709593089067	0.307733086140243	1.82856383805485	0.0674649741386281	0.121741220200028
ALPK3	368.733694445281	0.309931374353828	0.138172194609017	2.24308063739477	0.0248916150368008	0.0527703412497732
ALPL	356.549142838298	0.361629047205648	0.136499889505347	2.64929919369263	0.0080658889483633	0.0202678422310138
ALPP	0.0181126325202956	0.0379722492745726	2.90284728369466	0.0130810358119296	0.989563141135105	NA
ALPPL2	0.0232279247009283	-0.0671656702229855	2.90284728369466	-0.023137858681115	0.981540306901429	NA
ALS2	707.44595280802	0.206228117334278	0.0436455570884965	4.72506552994905	2.30041162991886e-06	1.69204919232968e-05
ALS2CL	68.1459127070831	-0.549407951694396	0.219279043293027	-2.50551964950071	0.0122271604203167	0.0288384594097016
ALS2CR11	2.5608513737444	0.150264186885385	0.243683952592631	0.616635544879654	0.537475143938994	0.638775640272196
ALS2CR12	7.23754172721816	0.259481500641179	0.225614607632475	1.15010948698797	0.250098779429655	0.353154557888105
ALS2CR4	1090.75337358417	-0.0966968443300591	0.0691042660585513	-1.39928907208318	0.161726315300269	0.250149312321324
ALS2CR8	173.19253910612	0.013501109314206	0.0834466616676424	0.161793282611823	0.871468643046674	0.910027411250225
ALX1	1.45420640367805	1.09892446543971	0.953432426969475	1.15259816464675	0.249075356907889	0.35215182536411
ALX3	60.2710884573872	0.0724083880073521	0.174699712069404	0.414473424996751	0.678527425464876	0.75967361137772
ALX4	2.78715639903628	0.276154958596789	0.479967334585706	0.575361985488363	0.565046508100852	0.66282671721908
AMAC1	0	NA	NA	NA	NA	NA
AMAC1L2	1.21089825906304	0.459191962222991	0.287676841522235	1.5962076050098	0.110442450246856	0.182975313241774
AMAC1L3	0.476334302224921	0.720391381388525	0.485986079826652	1.48232925034701	0.138252708973576	0.220381012183875
AMACR	364.368496340364	-0.208700069472942	0.0806900910508927	-2.58643988071981	0.0096973085571214	0.0236951626482705
AMBN	0.212973113149879	-0.00398897519191995	1.02340656427074	-0.00389774243314767	0.996890059365182	NA
AMBP	0.501421765256188	0.381066550741636	0.759645624658405	0.501637261338789	0.615922703819002	0.707327835599038
AMBRA1	777.370839728951	0.327360455576306	0.0565545966298872	5.78839696653954	7.10613153507783e-09	1.12794942212568e-07
AMD1	2446.71503561386	-0.351149192904997	0.082502946041869	-4.2562018661345	2.07928984796443e-05	0.000115627546771157
AMDHD1	17.9434251543131	-0.262368381864793	0.180766153984903	-1.45142426323185	0.14666175752864	0.230939939356892
AMDHD2	219.59894438147	-0.00465127171610387	0.0835675168040398	-0.0556588480068253	0.955613583186825	0.969139721425131
AMELX	0.0292967419799546	0.107499135243661	2.90284728369466	0.0370323081918518	0.970459245188832	NA
AMELY	0.00606802625330432	-0.0315546366945159	2.90284728369466	-0.0108702365679927	0.991326976874149	NA
AMFR	3793.44112939679	-0.148046399126013	0.0629024712364344	-2.35358637293508	0.0185932876779054	0.0412969847597197
AMH	97.2556005524178	0.606006808845707	0.241290619354854	2.51152245564294	0.0120211637536515	0.0284645963062104
AMHR2	0.0249860389283639	0.142686373500168	2.90284728369466	0.0491539373433937	0.960796619536699	NA
AMICA1	66.9793358772318	-0.426762204818504	0.233513254481485	-1.8275716544062	0.0676138631474085	0.121938198439931
AMIGO1	187.282741278867	0.12969486247709	0.109507953222558	1.18434194650232	0.236277730617598	0.337910036375896
AMIGO2	263.365328967154	-0.019105599191617	0.205927710346834	-0.0927781849244011	0.926079782154257	0.948116748392472
AMIGO3	180.697216719882	0.333061100867986	0.0965227564520208	3.45059665834909	0.000559348829645026	0.00201428301007933
AMMECR1	161.209532727671	0.167760426662142	0.108470264583312	1.54660290824028	0.121959028021296	0.198415567958963
AMMECR1L	704.941217525455	0.193513697345501	0.0460356402692775	4.20356263567915	2.62746400794174e-05	0.000141984112736852
AMN	0.777606351740379	0.478051089566011	0.397851072280611	1.20158301151652	0.229525126746411	0.330117421647643
AMN1	337.740487146762	-0.461353571778305	0.098271332680178	-4.69469131226469	2.67009619365503e-06	1.93080056078376e-05
AMOT	1015.46737952377	0.561311428923554	0.147666613330911	3.80120743790402	0.000143992687380574	0.000620254967629278
AMOTL1	1167.35874200535	0.398033045747766	0.095898309770983	4.15057415191486	3.31642301069588e-05	0.000174853566181046
AMOTL2	1225.84739635291	0.890896847897776	0.150287695817533	5.92794269052757	3.06753509478045e-09	5.43512819157948e-08
AMPD1	0.0723651350278158	0.14099380926977	2.53430655207313	0.0556340783455866	0.955633315941917	NA
AMPD2	1395.49891282844	0.229778906868684	0.0672589121957343	3.41633397519112	0.000634703531288165	0.00224827817740523
AMPD3	381.466816304903	-0.0608746027278585	0.149469102578564	-0.407272149746545	0.683808115386124	0.764206136409648
AMPH	423.87992494076	0.114402345900814	0.179158216782906	0.638554836920711	0.523112569647954	0.625176531934397
AMT	251.851475838008	-0.278807619273937	0.150717185987957	-1.84987277626199	0.0643318884746335	0.117158955172436
AMTN	0	NA	NA	NA	NA	NA
AMY1A	0.233601131483641	0.240205446659764	0.698537046167139	0.343869302247844	0.730944578868873	NA
AMY2A	0.359717662973318	1.03559224747431	0.612705063161423	1.69019698014388	0.0909902759363015	0.155979670834975
AMY2B	113.746110056379	0.21296014234229	0.171118409533865	1.24451917781613	0.213308545604364	0.312058967229227
AMZ1	58.2936711126122	0.550395229774393	0.194314421394031	2.8324981019206	0.0046185840383367	0.0126097791628127
AMZ2	1980.3373466189	-0.314550452265748	0.0652421066104077	-4.82127982384262	1.42640100771195e-06	1.12019195295597e-05
AMZ2P1	489.979824893244	-0.381267083430843	0.0892283298281379	-4.27293757672254	1.92914477018835e-05	0.000108289763977671
ANAPC1	464.283679946343	0.361694751336324	0.0672044145200881	5.38200881473656	7.36591569370349e-08	8.61864852541077e-07
ANAPC10	147.822457291157	-0.437255367479288	0.0630799426485785	-6.93176545697354	4.15620645194573e-12	2.09726425941779e-10
ANAPC11	2438.25904035934	-0.509386255030539	0.0959153550345215	-5.31078944395506	1.0915137932903e-07	1.19548014972794e-06
ANAPC13	1528.59974408129	-0.228040296601339	0.0629778659271095	-3.62095941557106	0.000293512558925092	0.00114576293894266
ANAPC16	1221.0527900269	-0.466562515548896	0.0832560677768198	-5.60394609074724	2.09525899525496e-08	2.90974036839113e-07
ANAPC2	815.267364641929	0.304420709912963	0.0697948496988021	4.36165005335899	1.29085219421122e-05	7.62136764960426e-05
ANAPC4	465.734612104733	-0.152819998946279	0.0522595111062023	-2.92425236500428	0.00345284688297685	0.00980050478905549
ANAPC5	2609.39804419913	-0.140526694081565	0.0596208540899608	-2.35700571933315	0.0184229631116063	0.0409743468462934
ANAPC7	1460.9582716687	-0.0880521308684286	0.0554325176315964	-1.58845628217036	0.11218319928088	0.185222253308936
ANG	156.923473016898	-0.499802139562974	0.129425954421664	-3.86168401690623	0.00011260814872447	0.000500107852703872
ANGEL1	644.528117279551	0.116734289932184	0.0828592097366365	1.40882697654513	0.158886336280449	0.246754047639689
ANGEL2	664.505090855716	-0.0432312329520906	0.050077090309612	-0.863293627581087	0.387976046947474	0.499713422829731
ANGPT1	318.846992071379	-0.47175831004713	0.213285590246633	-2.21186208361105	0.0269761958117599	0.0564707141751472
ANGPT2	1060.41680041903	0.0667679528037532	0.144702862620133	0.461414180720317	0.644501479470446	0.73159847294051
ANGPT4	1.70614137015844	0.365085556053535	0.390594559439563	0.934691862009985	0.349947122032098	0.461599607057742
ANGPTL1	157.890455971797	-0.319054730707179	0.235107114259441	-1.35706114939211	0.174761781597933	0.266100743396599
ANGPTL2	2208.99256799187	0.496633225304871	0.129764080392457	3.82720105442784	0.000129608647120215	0.000566435458034008
ANGPTL3	0.0654353663444824	0.176185092282852	1.87724217165925	0.0938531506178159	0.925225809886721	NA
ANGPTL4	1515.94751520811	-0.506787717521753	0.246913160013221	-2.05249374919756	0.0401217019151986	0.0789008952698668
ANGPTL5	1.87649176561351	-1.19967399054426	0.378958928697614	-3.16570978988998	0.00154705057693627	0.00490690609799328
ANGPTL6	27.9459027789732	-0.274534048645949	0.185006939543017	-1.48391216742503	0.137832223501463	0.219866481058214
ANGPTL7	1.93579018104145	-0.222518812924824	0.40682637710049	-0.546962599895189	0.584404426903258	0.679990244140023
ANK1	100.657834183471	0.265688251200788	0.214563288629756	1.23827451050702	0.215614291753785	0.314689776245744
ANK2	3831.34548421497	0.0902798912701534	0.112565757668334	0.802019132107258	0.422541891254944	0.533225134589438
ANK3	316.494489416159	0.693933249182588	0.173591024268784	3.99751802897435	6.40101170778159e-05	0.00030953426876242
ANKAR	20.6734622994852	-0.066135333440252	0.0954457831085579	-0.692909956692703	0.488366060854894	0.594032819642503
ANKDD1A	210.433158866219	0.166602593271184	0.101332951439331	1.64411073500539	0.100153330921245	0.168774128868785
ANKFN1	50.1134368049756	0.528531611929024	0.169157344161286	3.12449698562946	0.0017810934674818	0.00554870225146113
ANKFY1	2938.86771924513	0.257177513177397	0.0691688972215845	3.71810920092483	0.000200719506574091	0.000827542321464568
ANKH	1689.30736151343	0.00168850640008179	0.117818867919173	0.0143313751855106	0.988565608420817	0.991930140146179
ANKHD1	1407.32975980057	0.27104738834903	0.0646712385990042	4.19115814418937	2.77534120115527e-05	0.00014939160778682
ANKHD1-EIF4EBP3	451.975194802317	0.433680260872899	0.0989934049747673	4.38090053558054	1.18189817442705e-05	7.05451602021112e-05
ANKIB1	2448.21211008991	0.0843532792985012	0.0724286747843258	1.16463927511699	0.244165038865399	0.346810702538548
ANKK1	6.96813886221257	0.626027005904513	0.301426678208624	2.07687988875101	0.03781264637612	0.0749392799500654
ANKLE1	31.1555013389193	0.552081701487095	0.159577886008447	3.45963789404925	0.000540902243112997	0.00195608002013757
ANKLE2	1216.74186794405	0.134959319119768	0.0466878378897264	2.89067400033672	0.00384416659597921	0.0107466954861014
ANKMY1	145.479402563896	0.215790975479161	0.0792284193812603	2.72365619766739	0.0064563677443604	0.0167452145247444
ANKMY2	834.170144285018	-0.219011440981334	0.0685269712295784	-3.19598892307094	0.00139352461556145	0.00447440576437369
ANKRA2	321.867434132675	-0.267267694656679	0.0673446289818037	-3.96865642735805	7.22790039283354e-05	0.000342649504728393
ANKRD1	6.01702709217866	-0.620800749455345	0.39205497206421	-1.58345332591184	0.113318176860155	0.186707658511501
ANKRD10	1955.750541582	0.137313649235978	0.105894841440467	1.29669819009242	0.194735052344319	0.290800895238748
ANKRD11	1826.27488298347	0.493973414027198	0.0805939428795962	6.12916301619803	8.83425748244716e-10	1.88240860858211e-08
ANKRD12	649.189799531081	0.254541417599319	0.0844894026598802	3.01270229858292	0.00258932790532029	0.00767410564424524
ANKRD13A	903.725395694766	0.125138907320546	0.0546427375016636	2.29012880836609	0.022013850816449	0.0475723495653711
ANKRD13B	485.30686089651	0.586813216241858	0.117944620731778	4.97532835835177	6.51371294201908e-07	5.62644637604569e-06
ANKRD13C	589.97052052084	0.122779810525042	0.0448955590242674	2.73478743095005	0.00624205715208218	0.0162691530178327
ANKRD13D	580.50855298919	0.0131187691906438	0.064643412389499	0.202940542674304	0.839181505096716	0.886139403890513
ANKRD16	131.385731436771	0.14222000268532	0.0823003334234633	1.72806107544606	0.0839772750965699	0.146157680764223
ANKRD17	1940.51057563514	0.385161309972305	0.0661149794563468	5.8256285207895	5.68980523276794e-09	9.29007863306084e-08
ANKRD19	20.4910279987307	0.354675339066047	0.110332346129791	3.21460887497869	0.00130622369006803	0.00422654315260588
ANKRD2	2.0563474637411	0.00898756966879662	0.392510693063833	0.0228976428607386	0.981731920628492	0.986945433539203
ANKRD20A3	50.0129851328226	0.766043374840386	0.223079718197604	3.43394451557369	0.000594865947693547	0.00212263277843666
ANKRD20A4	5.64485962143575	0.728365422742162	0.329781762959774	2.208628567587	0.0272004866325276	0.0568806455348113
ANKRD20B	12.1364686156273	0.65854262576091	0.213296715699282	3.08744850384551	0.00201882746852845	0.00618616343397779
ANKRD22	184.480753800101	-0.525690627945496	0.192611360479084	-2.72928152647871	0.00634724912048093	0.0164920734248984
ANKRD23	35.5704570402827	0.578008704752104	0.111323895093627	5.19213511408294	2.07896037523546e-07	2.08988392332222e-06
ANKRD24	105.910152427545	0.449680432024444	0.178806099826938	2.51490543364951	0.0119064315574181	0.0282375399088234
ANKRD26	105.95756175243	0.48055752780604	0.101357923095037	4.74119351632186	2.12462873931507e-06	1.58020360826478e-05
ANKRD26P1	0.695244460064182	0.701129828806852	0.389848386004999	1.79846795312335	0.0721028826813808	0.128691766786617
ANKRD27	509.824216623378	0.100347537165575	0.0547616365329597	1.83244226284541	0.0668855563537427	0.120867146851458
ANKRD28	907.906922836877	0.481387709311127	0.0819293709888538	5.87564268468042	4.2120598312017e-09	7.14619660418221e-08
ANKRD29	48.014581427782	-0.791311736685199	0.199199543208347	-3.97245758670013	7.11349048996747e-05	0.000338168154828377
ANKRD30A	0.0122962308572824	0.00320880629002841	2.90284728369466	0.00110539962196851	0.999118018887731	NA
ANKRD30B	0.453621935369973	0.26457732193197	0.611007719598408	0.433017969242461	0.665001715470413	0.748977180508222
ANKRD31	0.231747576375024	0.170253978606299	0.755168080403579	0.225451767658548	0.821627843291567	NA
ANKRD32	158.046862830051	0.0631403768307912	0.0804757809837215	0.784588556444866	0.432694841687983	0.542179150967134
ANKRD33	0.671196318389824	0.124280588645506	0.444855133838449	0.279373169357734	0.779958459419438	0.840984047856536
ANKRD34A	80.0653288485469	0.176259864906949	0.126355651595786	1.39495038552615	0.163030801558451	0.251647578338957
ANKRD34B	1.36098959990833	1.19667410802515	0.519837044328857	2.30201775937328	0.0213341706764898	0.0463430034359212
ANKRD34C	2.35783288596709	0.201212321578202	0.430660720838406	0.467217723470309	0.640344114533776	0.72793606547253
ANKRD35	263.21501687074	-0.33799658988578	0.158249122969535	-2.13585126756658	0.0326915388068637	0.0663197556573759
ANKRD36	130.280045208294	0.634181088891037	0.133632898472867	4.74569582893394	2.07790768699889e-06	1.55316258699036e-05
ANKRD36B	20.5503952410912	0.858127369852027	0.161306502292989	5.31985603589227	1.03849395411139e-07	1.15001695016867e-06
ANKRD36BP1	57.3008088510767	0.532464960329379	0.138467954030702	3.84540209362317	0.000120354913862248	0.000529856247466016
ANKRD37	132.892443717085	-0.339741660830718	0.124341709215446	-2.7323225888913	0.00628895312472186	0.0163747695084694
ANKRD39	161.412647630882	-0.347957958763427	0.0792313520791586	-4.39167008554629	1.12483291320518e-05	6.75651139314694e-05
ANKRD40	2186.4552642425	0.0488525811829813	0.0585555357977109	0.83429483681526	0.404114860640174	0.515761951156972
ANKRD42	242.546035519404	-0.0766946964366539	0.0865968562245496	-0.885652202405375	0.375804972190359	0.487273007921516
ANKRD43	112.937767550531	-0.191129000733902	0.199746511966157	-0.956857763635366	0.338639051986738	0.449685055816991
ANKRD44	110.118588637468	0.650637244235189	0.11628476788542	5.59520611397948	2.20359821975556e-08	3.05077062233133e-07
ANKRD45	112.942178401372	-0.609696071452082	0.18987196706013	-3.21109050952741	0.00132232279511875	0.00427478934880741
ANKRD46	897.199546430693	-0.231754829002084	0.109322031619632	-2.11992793738444	0.0340121229594103	0.0685150591752229
ANKRD49	254.329109570724	-0.342134013477025	0.0810469560074686	-4.22142953086969	2.42757849426581e-05	0.000132536647361495
ANKRD5	41.2694670361307	-0.604073744855386	0.23249948526655	-2.59817239665216	0.00937214272608772	0.0230131915327637
ANKRD50	490.259994443302	0.486518640725621	0.0853014541639849	5.70352106530716	1.17357527113973e-08	1.75441210940788e-07
ANKRD52	1480.15948857078	0.398504734943615	0.0962183735935851	4.14166982937013	3.44786434901456e-05	0.000181146340790762
ANKRD53	53.2240531840949	-0.350387777094919	0.189992987270244	-1.84421426353242	0.0651519204636571	0.118400579791674
ANKRD54	600.683769819686	-0.0444756218827746	0.0733430807207781	-0.606405150229457	0.544245749336436	0.644734573220899
ANKRD55	6.71874423890762	0.507021515498944	0.23225838278333	2.18300631143177	0.029035345228999	0.0600818833964237
ANKRD56	6.46556490264975	0.0720336594408786	0.281720411349399	0.255692014277021	0.798188661927885	0.854130129861358
ANKRD57	336.902753615116	0.0806096902544778	0.0978065498152642	0.824174765460313	0.409840263132909	0.521134872632736
ANKRD58	27.6220297504957	-0.193242048054889	0.152100123061124	-1.27049238465922	0.203909293787636	0.301496731026626
ANKRD6	596.199041000701	0.464657317171601	0.114761280288585	4.04890321895284	5.14582172070568e-05	0.000256137442084614
ANKRD7	7.57497702966754	-0.456317037313886	0.26543517833107	-1.71912796255187	0.0855910741981988	0.148434896661563
ANKRD9	103.957072835109	0.0294944325324505	0.127930573098747	0.230550304106621	0.817664179046127	0.869338558925869
ANKS1A	732.846344431883	0.498815751607814	0.0770154426271708	6.47682769314934	9.36710557497154e-11	2.86981306065227e-09
ANKS1B	322.578730097241	0.822771996752506	0.208694006216445	3.94248024497252	8.06432945457939e-05	0.00037669844392508
ANKS3	319.335629526886	0.249851416451619	0.0860844319490798	2.90239954884537	0.00370315900702257	0.0104172706995611
ANKS4B	0.0773906111118608	0.245711450519659	2.03276912585794	0.120875237327287	0.90378985608376	NA
ANKS6	496.232732847793	0.35004473432675	0.0790337359698895	4.42905463130467	9.46470479262616e-06	5.82323814541871e-05
ANKZF1	526.862289469865	0.285848610841722	0.0894760986162791	3.19469238447233	0.00139979954174622	0.00448974406255824
ANLN	1083.06778951753	0.296307947692076	0.138455093070121	2.14010146627116	0.0323465676269009	0.0657831812961874
ANO1	74.163469945569	0.365623419847515	0.211131206993199	1.73173556412858	0.0833206554423952	0.14532428159015
ANO10	594.040708729108	-0.0348481582044323	0.05648365722241	-0.616960018491973	0.537261097476105	0.638605656114361
ANO2	13.788510882475	0.0911563811810692	0.17388047470127	0.524247367840912	0.600106498954358	0.693210942886745
ANO3	35.0408462513449	0.427702015281876	0.266431672923197	1.60529718779031	0.108428417775356	0.180108736989164
ANO4	58.8502951397969	0.572852571417465	0.270225051413006	2.11990919576857	0.0340137037542477	0.0685150591752229
ANO5	140.524531262558	0.463183297489401	0.235738133128751	1.9648212673188	0.0494349278046434	0.0943676617809901
ANO6	2185.56853759925	-0.143598435507751	0.0952244594836123	-1.50799948129361	0.131554659772766	0.211409078844913
ANO7	21.7371716457988	-0.245794475693203	0.154303010495719	-1.59293376651276	0.111175050303825	0.183997972370823
ANO8	692.032127483316	0.619769240582596	0.120718021540278	5.13402417199001	2.83611647115221e-07	2.72461103724366e-06
ANO9	2.06291727570392	-0.0689326870076235	0.387375081608572	-0.177948170340181	0.858763680043919	0.900787752808973
ANP32A	2198.60175405231	0.0977339772383762	0.0594711035286827	1.64338597132706	0.100303100803995	0.168963564841813
ANP32B	2005.98049512309	0.212559131757104	0.070644019586864	3.00887651920402	0.0026221566540809	0.00775351286862724
ANP32C	0.937992836677652	0.00398045229342378	0.271780902752231	0.0146458130542474	0.988314749632493	0.991789099793023
ANP32D	0.0122041654734614	0.0731594875310801	2.90284728369466	0.0252026649634716	0.979893311299146	NA
ANP32E	1557.7092257656	0.154646091412015	0.0664023016157041	2.32892667346098	0.0198629505977735	0.0436053837341746
ANPEP	279.675225904539	-0.413081376931536	0.218838512282681	-1.88760823048343	0.0590785643386662	0.109094250032506
ANTXR1	3625.64633150394	0.182943191799596	0.0935557794218739	1.95544511445567	0.0505305556035988	0.0961122699074691
ANTXR2	626.736339436245	-0.188420722033206	0.132468565994932	-1.42238062757028	0.154915783879801	0.241714858345856
ANTXRL	0.0965986410773796	0.0701995559334251	1.67721441364271	0.041854848946212	0.966614410152852	NA
ANUBL1	74.5594407292639	0.212612175731266	0.115384801652107	1.84263588173689	0.0653821913351773	0.118711088235419
ANXA1	7160.32049946531	-0.654688769080016	0.167801185833895	-3.90157415054317	9.55691769406753e-05	0.000435117994455976
ANXA10	0.0714289776217752	0.0710481585545498	1.46605858510035	0.0484620186918975	0.961348033549369	NA
ANXA11	1059.54952269199	-0.237888193219615	0.100996814580638	-2.35540293233386	0.0185026303937993	0.0411413581852233
ANXA13	5.89589049547496	-0.825927964281921	0.307578062692237	-2.68526291196634	0.00724727722066105	0.0185056131671686
ANXA2	6250.14717665252	-0.677724621565471	0.151988178565411	-4.45906140834367	8.23193359642893e-06	5.14753455487406e-05
ANXA2P1	72.0114521455849	-0.659896697318174	0.151757091688813	-4.34837469520918	1.37150141890133e-05	8.01855706031261e-05
ANXA2P2	3194.95546060551	-0.667273481064603	0.153136484376377	-4.3573775627798	1.31630088798863e-05	7.74618951884406e-05
ANXA2P3	1.74110004236676	-0.559120789797404	0.302314885082552	-1.84946496976067	0.0643907015379025	0.11723044912509
ANXA3	23.5733868699004	-0.429676010772325	0.278826263767744	-1.54101699375865	0.123312650100813	0.200203547839038
ANXA4	793.256394242131	-0.668420385424884	0.114647238094864	-5.83023539452217	5.53492414275139e-09	9.06558067242633e-08
ANXA5	14102.7224242861	-0.405830205478142	0.102614230417246	-3.95491155396254	7.65629703723169e-05	0.000359412283783803
ANXA6	3815.98821717572	0.0821147781075398	0.0819282098437581	1.00227721640858	0.316209723244401	0.425497640345068
ANXA7	1726.27323060497	-0.336952752355409	0.0734761555355952	-4.58587891403999	4.52080565009928e-06	3.07496856321428e-05
ANXA8	1.52465653777925	-0.237485133404057	0.537621128769029	-0.441733259159322	0.658682239309257	0.743939043631079
ANXA8L1	0	NA	NA	NA	NA	NA
ANXA8L2	0.415014447659536	-0.0459591874102872	0.745210724276211	-0.0616727402238143	0.950823448783025	0.965547087431587
ANXA9	34.3993460458005	0.143247363764573	0.104681997496734	1.36840495204576	0.171185355046645	0.261807757901085
AOAH	244.937137901161	-0.37209627855603	0.173649536883281	-2.14280029324889	0.032129137769179	0.0653927584473648
AOC2	15.1430409425167	0.639328183363792	0.154036216667421	4.15050562261058	3.31741618371843e-05	0.000174854667784268
AOC3	52.0902288990503	0.123263475744676	0.165438608813804	0.745070794710349	0.456228923480811	0.56444833240774
AOX1	92.1211097395881	-0.31483885009276	0.236342529648459	-1.33212947564307	0.182817646032471	0.276076290725331
AOX2P	0	NA	NA	NA	NA	NA
AP1AR	383.964080985866	-0.0375236526185065	0.0682152697385276	-0.550077024723884	0.582266544384289	0.677985207782911
AP1B1	3574.05162071483	0.146030498170783	0.0822370018066997	1.77572740934831	0.0757778574003754	0.134093179916201
AP1G1	1835.42609231319	0.15757625158336	0.0543029733813437	2.90179785325525	0.00371027875249948	0.0104291608760084
AP1G2	301.61676099604	0.29203905563083	0.121009828228635	2.41334988988708	0.015806637418852	0.0359603500747166
AP1M1	1982.24046619838	0.0690062985293378	0.0547068349201967	1.26138349312294	0.207170712623554	0.305170205767664
AP1M2	0.536870712584294	-1.78004297438484	0.941919234370291	-1.88980425224555	0.0587841446556795	0.108695667025266
AP1S1	1798.91396279165	-0.44178705966428	0.0804402280295664	-5.49211595349901	3.97146491181641e-08	5.02623680324463e-07
AP1S2	1867.94151879388	-0.199293460254878	0.109466653153821	-1.82058603705398	0.0686698069144697	0.123628124500013
AP1S3	51.5371679245954	-0.34338607449382	0.123924517623667	-2.77092928081118	0.00558965653875315	0.0148677767495263
AP2A1	2671.22125218602	0.200723567606147	0.0676168944537818	2.96854165260943	0.00299216546169827	0.00868061036670135
AP2A2	2209.15880807703	0.158420946804619	0.0633587308670035	2.50038068371605	0.0124059915232318	0.029210441418408
AP2B1	7506.29118764727	0.17519708140125	0.0543514055146656	3.2234139989991	0.00126672329471768	0.00411502018284009
AP2M1	8547.05618304523	-0.0883900648064537	0.0518576084285444	-1.70447630511631	0.0882921391031046	0.152194558576654
AP2S1	2010.88583220004	-0.483621728993443	0.0790041338235059	-6.12147372027199	9.27138117716514e-10	1.96391659705698e-08
AP3B1	965.48116047054	-0.0184293752223878	0.0577518618322133	-0.31911309242169	0.749640755973481	0.817508905186288
AP3B2	489.456885761035	0.356291308835022	0.139379272124928	2.55627184303037	0.0105800428498543	0.0255124015301395
AP3D1	3427.97023015867	0.367949184856068	0.0751507272173532	4.89614935850021	9.77327954159885e-07	8.02935857816874e-06
AP3M1	1076.9311893448	0.13740345524585	0.0487175245977484	2.82041126638442	0.00479621360845733	0.0130334097211388
AP3M2	773.434118105871	-0.0634394912531967	0.0776527606366646	-0.816963759344352	0.413949138954943	0.525034298255567
AP3S1	885.442379679762	-0.319358746644062	0.0626229101107317	-5.09971104950827	3.40172381576787e-07	3.19794046538261e-06
AP3S2	1926.3209977614	-0.19618466796739	0.0539325984176025	-3.63758976432627	0.000275201294326613	0.00108630818199513
AP4B1	475.833557291601	-0.00764974484322084	0.048998365509882	-0.156122449465749	0.875936503221796	0.913155299631371
AP4E1	230.115717200947	0.21814891441669	0.067740440672205	3.22036455995776	0.00128027672874769	0.00415229877183019
AP4M1	589.420328255744	-0.251833831523034	0.0729490408099048	-3.45218838694916	0.000556059346343804	0.00200364081038809
AP4S1	118.603281252449	-0.223261758093192	0.105434466069312	-2.11754055781363	0.0342139969511536	0.068855274855612
APAF1	490.977215131803	0.249888478871034	0.0637562360062619	3.9194358783428	8.87564703564186e-05	0.000409176201714902
APBA1	514.759858318392	0.642776059566282	0.127322454984591	5.0484108215167	4.45500340894674e-07	4.03214802750368e-06
APBA2	2206.60873068323	0.388597575271178	0.10553246633273	3.68225616983102	0.000231178938501624	0.000934813906065983
APBA3	363.80161121001	-0.129675009912752	0.0732224596516453	-1.77097314853501	0.0765651670050646	0.135260114284782
APBB1	2300.54567982873	0.173994650158207	0.0820400603817971	2.12084985491811	0.0339344396821464	0.0684166999152153
APBB1IP	796.05732392658	-0.122414823404851	0.147588512368347	-0.829433276617977	0.406859278156139	0.518344946044205
APBB2	1703.02397830259	0.340925539122534	0.0920750815438349	3.70269060212808	0.000213324980605701	0.000872313881585478
APBB3	477.915448852804	0.146438497935291	0.116640554263862	1.25546812478292	0.209308872327526	0.30760895316975
APC	2309.53097111877	0.320597705358584	0.0910005792913774	3.52302928019889	0.000426644223289068	0.00158697421556835
APC2	4274.54896951961	0.659734823430894	0.146364379251491	4.50748212648996	6.56014548998867e-06	4.24838518156126e-05
APCDD1	1883.52592115097	0.111278920668885	0.12273098753421	0.90668968696978	0.364570918634235	0.475932302607294
APCDD1L	49.7452638262393	0.128633944036451	0.409581650071579	0.314061784784477	0.753474113413755	0.820742681279596
APCS	0	NA	NA	NA	NA	NA
APEH	1870.25886561065	-0.162946371336367	0.0601698993410732	-2.70810443628475	0.00676687247427847	0.0174498759072876
APEX1	3345.15853903522	-0.145676029072313	0.0765090639316419	-1.90403622245947	0.0569054668406592	0.105765596905996
APEX2	469.333165581081	-0.0347037210798352	0.0613637752165468	-0.565540841601893	0.571705952979937	0.668799144583431
APH1A	5075.35099267648	-0.181542777609058	0.0499247551358983	-3.63632785208235	0.000276552312182595	0.00108996642171637
APH1B	760.21693560035	-0.194340251622419	0.0689698928759068	-2.81775487127525	0.0048360715342453	0.0131269534561189
API5	1974.15837259499	-0.179651597038252	0.0460750783491211	-3.8991056222844	9.65486544987922e-05	0.000439132777568609
APIP	347.403877765978	-0.328682167925167	0.0683575321309855	-4.80828019500985	1.52234291974246e-06	1.18416155141213e-05
APITD1	284.232221134606	-0.449016365280793	0.0947347754554519	-4.73972058435857	2.14013136750915e-06	1.5897613594913e-05
APLF	44.799486521344	-0.108104359217887	0.12186244329192	-0.887101524453473	0.375024243400345	0.486541335544063
APLN	2975.17737600041	-0.18184987332591	0.146307561364474	-1.2429287429164	0.213894092830834	0.31266952715604
APLNR	4248.0848433032	-0.0684250548139127	0.203100887211305	-0.336901801628881	0.736190927134808	0.806165599074005
APLP1	4439.66077900247	0.246722084598768	0.146709575246856	1.68170403454328	0.0926262453096655	0.158345094643443
APLP2	13377.7130865753	-0.130421980578181	0.0741447740685556	-1.7590178433559	0.078574477893384	0.138280008849654
APOA1	5.08303419186036	-0.115417856503486	0.219116885600028	-0.526741041373544	0.598373430833794	0.692124246212693
APOA1BP	2377.0848518498	-0.528320329523667	0.0992565340662746	-5.32277632393351	1.0219537617899e-07	1.13730299826916e-06
APOA2	0.00608453760105428	0.0383960445465356	2.90284728369466	0.0132270287735103	0.989446665682404	NA
APOA4	0.132597841016748	0.348734370791805	1.25966369616839	0.276847202830863	0.781897434523617	NA
APOA5	0.17614839072039	0.172373250244946	0.9585204028696	0.179832635517093	0.857283961834126	NA
APOB	8.47683028335844	1.2966416363391	0.323657022082057	4.00622123999634	6.16978624706778e-05	0.000300047149451777
APOB48R	198.438089678491	0.240879267526542	0.143068053655236	1.68366914466461	0.0922456276220565	0.157844468806381
APOBEC1	0	NA	NA	NA	NA	NA
APOBEC2	1.80387222209438	0.230977132144534	0.20385120476429	1.13306728999522	0.257185996416192	0.361515785489198
APOBEC3A	5.94897685035945	-0.256561574687685	0.269264376119371	-0.952824054875887	0.34067922424982	0.451960399004777
APOBEC3B	85.7882696436083	-0.0489633951324987	0.174836101020207	-0.280053117444204	0.779436752819836	0.840522309930559
APOBEC3C	272.221399533892	-0.373941699734524	0.138984903585293	-2.69052026578586	0.00713407018431627	0.0182460514855292
APOBEC3D	32.1209633154125	-0.369406100625204	0.163978063486462	-2.25277755311279	0.0242731781987975	0.0516541044523931
APOBEC3F	93.6915486947879	-0.324053483874526	0.140491069948262	-2.30657709414458	0.0210784077177382	0.0458649829879981
APOBEC3G	279.391883458277	-0.764432960971093	0.144284229648989	-5.2981047397265	1.17010844284284e-07	1.26611308549902e-06
APOBEC3H	5.4737061198916	-0.44900677949038	0.237970379514816	-1.88681793257562	0.0591848182988403	0.109223168012965
APOBEC4	0.455754157305489	-0.627171420811953	0.931590997835025	-0.673226149962238	0.500803427215362	0.605475551935534
APOC1	3328.02968741018	-0.864454892564921	0.165057405454533	-5.23729844283205	1.62944092977431e-07	1.68995765173363e-06
APOC1P1	2.71961067040415	-0.989594160578009	0.301335307123469	-3.28402990683244	0.00102334062354362	0.00342013710719355
APOC2	1821.90051633918	-0.89597672140092	0.174911826420933	-5.12244791981482	3.0159441148791e-07	2.87129375129622e-06
APOC3	0.00635930521508729	0.0383960445465356	2.90284728369466	0.0132270287735103	0.989446665682404	NA
APOC4	3.1756571497182	-0.418442638628635	0.26807060192603	-1.56094191463821	0.118537456504803	0.193868462875807
APOD	3396.11388823365	-0.238744414763401	0.209068732199518	-1.1419422323543	0.253478032517188	0.357213998418548
APOE	32747.1268277448	-0.16040555641652	0.133995389092424	-1.19709758300623	0.23126852194317	0.332231127391587
APOF	0.231729193348082	-0.459308351952419	0.758908619055024	-0.605222210447866	0.545031360103403	NA
APOH	4.54805382411415	-2.40067852895461	0.754995039315087	-3.17972755308757	0.00147413578004306	0.00470050671423659
APOL1	718.545917524194	-0.259258579198099	0.209915845184722	-1.23505959719218	0.216808324653608	0.316124607635032
APOL2	1372.28308716313	0.0905254806547097	0.111012538017827	0.815452761202275	0.414813193922126	0.525833543349228
APOL3	290.454737270015	0.0222492302858514	0.140672366150766	0.15816347513488	0.874327984055502	0.912112910566399
APOL4	1070.43175946829	-0.151792578099628	0.217625865623896	-0.697493276658383	0.485494145523474	0.591499675705858
APOL5	0.130893751470197	-0.00102153624519877	1.05311934963562	-0.00097000994764005	0.999226044160324	NA
APOL6	990.754379296817	0.0880677130105183	0.145443949608665	0.605509636168954	0.544840423937922	0.645269027599578
APOLD1	1302.13373943178	0.268301651730589	0.12990894575963	2.06530543498542	0.0388941096525302	0.0767553679349395
APOM	80.7001558421729	-0.381281325598874	0.119304990165254	-3.19585396277849	0.00139417657842584	0.00447570003327567
APOO	517.436372380929	-0.456278460642602	0.0674671659901292	-6.76297060868627	1.35190671295625e-11	5.76679907177957e-10
APOOL	120.179982478656	0.322777628461834	0.106941543212481	3.0182623026162	0.00254228752296465	0.00755960628521763
APP	28621.5691270755	-0.0329999998667707	0.0775373473696219	-0.425601351945394	0.67039835499102	0.753123994176071
APPBP2	1318.0234499056	0.105720711012994	0.0531265062353541	1.98998049193456	0.0465930845078007	0.0897621887293292
APPL1	1213.17177998364	0.220970886936314	0.0546477538210575	4.04354930414664	5.2648078617698e-05	0.000261048537595997
APPL2	1535.38568045274	-0.0618567643322199	0.070329085935844	-0.879533176197502	0.379112252994438	0.490641534099883
APRT	956.817585777449	-0.489632559557115	0.0791211912752662	-6.18838710167623	6.07829166129427e-10	1.36982452677589e-08
APTX	560.451174348824	-0.16820737889493	0.0771184263368079	-2.18115678554304	0.0291718219216479	0.0603365204645102
AQP1	29235.1610563065	-0.343055952573111	0.227982044550592	-1.50474987295318	0.132388395625848	0.212558959640679
AQP10	0.121851301520258	-0.000598095398048855	1.25274036005843	-0.000477429655113019	0.999619066263787	NA
AQP11	72.2163547786536	-0.115848224946927	0.099102702088831	-1.16897140547274	0.242415152242439	0.344659190286032
AQP12A	0.0303037369746225	0.107499135243661	2.90284728369466	0.0370323081918521	0.970459245188831	NA
AQP12B	0.178596834188227	0.486942669266962	0.832153747953897	0.585159497826283	0.558440475641071	NA
AQP2	0.510354276595238	0.93253474843268	0.592874945885525	1.57290294505502	0.115741293081579	0.189865129506441
AQP3	48.7078233009325	-0.20932855491262	0.191645481241538	-1.09226971362187	0.274714568332681	0.380445618119123
AQP4	29027.5454131701	-0.344100624367586	0.164689415021039	-2.08939126004928	0.0366725173328531	0.0729965581872891
AQP5	113.991152531065	-0.733916593692152	0.274154636082716	-2.67701689885236	0.00742808883561953	0.0189028936776258
AQP6	84.8398712854091	-0.311904435308721	0.159429683769173	-1.95637617747712	0.0504208563581322	0.0959239057171956
AQP7	0.299826011307666	0.552655168682635	0.599891695884732	0.921258241235643	0.356915617426228	0.468762905411033
AQP7P1	21.7208230922967	0.422396705856591	0.362164789298581	1.16631080198233	0.243488807391354	0.345966354771536
AQP7P3	1.13319792814409	-0.0465989969660317	0.549304260983587	-0.0848327607774083	0.932394348075139	0.952791633375948
AQP8	1.04121788403053	0.407394491708951	0.339061845931442	1.20153445926595	0.229543947826055	0.330117421647643
AQP9	196.343586958622	-0.575613437277966	0.281200748992481	-2.04698401174372	0.0406596543847525	0.0798452964026413
AQPEP	6.21720506308361	0.268186297948034	0.172841697727797	1.55162962105587	0.12075087136309	0.196790545590739
AQR	644.8913930253	0.107228283442498	0.070058640487607	1.53055044597199	0.125880536834224	0.203710570901348
AR	71.4824359171571	0.603927913410493	0.19357510913395	3.1198634788969	0.00180934876677526	0.005621292685628
ARAF	1074.38809560482	0.0456101928773126	0.0568821545573445	0.801836590618797	0.42264748952411	0.53327123657593
ARAP1	1794.05355018349	0.233609568901654	0.0758657419010707	3.07924977793379	0.00207522613735697	0.00633738611890436
ARAP2	894.050194990117	0.117920900573397	0.118727743341421	0.993204260897102	0.320610422314455	0.430223685636708
ARAP3	995.75101163511	0.111057101045499	0.141784842818057	0.783279078624867	0.433463246144582	0.542893169347737
ARC	1916.59714880547	0.489035629670372	0.208328804823263	2.34742204797483	0.0189038282947526	0.0418523264868683
ARCN1	3008.07703839622	0.0959167929594922	0.0501846046525382	1.91127923839569	0.0559687056607209	0.104445491605521
AREG	25.6296920949924	-0.668961970160009	0.376305744047683	-1.77770863384759	0.0754517209339384	0.133673899051911
ARF1	8517.57684919769	-0.102031180919677	0.0528010093108437	-1.93237179083095	0.0533136332360258	0.100397107865622
ARF3	6506.56336148537	0.0223499272251563	0.0699706296763839	0.319418695079998	0.749409036136129	0.817309972619147
ARF4	5310.89524471419	-0.283008150844084	0.0793467661130866	-3.56672571180449	0.000361469478086869	0.00137434822281485
ARF5	3726.70430192256	-0.3783113005183	0.0760507016911835	-4.9744616697226	6.5429208454667e-07	5.64896248127091e-06
ARF6	1474.72527627714	-0.0243839192240256	0.070051938152269	-0.348083434480046	0.727777524716405	0.799288610961822
ARFGAP1	1753.8194401623	0.0984336288065822	0.0791876592258424	1.24304253679037	0.213852159093671	0.31266952715604
ARFGAP2	1842.20690430726	-0.0250803510187423	0.0414853450075999	-0.604559297124025	0.54547185835318	0.645846724644387
ARFGAP3	998.330173211831	0.0184208269915225	0.0666929643129877	0.276203452362295	0.782391805738862	0.842748816148042
ARFGEF1	874.100282518448	0.158541954379564	0.0586876764482737	2.70145222940117	0.00690373970244946	0.0177265640789336
ARFGEF2	712.255923255973	0.169358085293088	0.0718230904044259	2.35798939226168	0.0183742179998669	0.0408760436058394
ARFIP1	831.882168091007	-0.402731896217072	0.0499555413458845	-8.0618062654675	7.51752754194123e-16	1.7332719912086e-13
ARFIP2	1201.94155817307	-0.252022606069796	0.06407721551462	-3.93310795492189	8.38545542783737e-05	0.000389372657924677
ARFRP1	674.42695457337	-0.224621697139227	0.0677282865155538	-3.31651232735147	0.000911485661749175	0.00308172679192823
ARG1	4.09079764005286	-0.0119476779048375	0.365404214850929	-0.0326971540536599	0.973916093415487	0.981117355141391
ARG2	281.885025705156	-0.0420777686419173	0.0999675348703218	-0.420914336804451	0.673817635816222	0.755859304049335
ARGFX	0.0058751268910727	-0.0315546366945157	2.90284728369466	-0.0108702365679926	0.991326976874149	NA
ARGFXP2	0.334181460852161	1.16665246133942	0.508383326068246	2.29482833428491	0.0217429641637579	0.0471058267101581
ARGLU1	2047.15909684321	0.136482580590222	0.116570826888791	1.17081249428236	0.241674154534436	0.343871661231578
ARHGAP1	3014.05696438328	0.235145574002552	0.0709156843702056	3.31584720772074	0.000913657668752923	0.00308764231156375
ARHGAP10	182.82620158917	0.130451208141213	0.112358801079901	1.16102349693502	0.245632344064013	0.348297096558165
ARHGAP11A	393.626249759773	0.561116472066511	0.119815704825938	4.68316297001025	2.82481744107839e-06	2.03124817514409e-05
ARHGAP11B	17.253764083625	0.786736187379581	0.16998689467894	4.6282167155622	3.68827944060576e-06	2.5619937218947e-05
ARHGAP12	927.208653521332	-0.0913843673405164	0.0817446396850909	-1.11792489015257	0.263599073607721	0.368377046194095
ARHGAP15	128.72621753156	-0.498677000627524	0.132876999119761	-3.75292190470128	0.000174785318834982	0.000733568068594707
ARHGAP17	854.954889778308	0.280948272786316	0.0554552025288655	5.06622029989121	4.05792270845706e-07	3.7214524216671e-06
ARHGAP18	609.576398627025	-0.464059393817196	0.117084867139687	-3.9634446803749	7.38759885053879e-05	0.000348801726773666
ARHGAP19	389.136463047986	0.425588858584661	0.0959606521335784	4.43503508075619	9.20572969497172e-06	5.68139474380135e-05
ARHGAP20	206.323640802728	-0.211277660246868	0.125685568582801	-1.68100174609688	0.092762575406289	0.158502817682347
ARHGAP21	3175.7185666868	0.527800751476593	0.0801454593889431	6.58553529421042	4.53249403902067e-11	1.55261662471901e-09
ARHGAP22	211.763732885428	0.379684586994079	0.13777840401908	2.75576270241525	0.00585554614539095	0.0154521117943816
ARHGAP23	1446.96083898314	0.386403072384809	0.102631639099331	3.76495080635742	0.000166581875008169	0.000703571733242582
ARHGAP24	278.521449914559	0.0206952510971725	0.131645125637231	0.157204841402191	0.875083412858317	0.912636284901645
ARHGAP25	356.602412245077	-0.0583506843451471	0.113148223827598	-0.515701284308756	0.606063057497743	0.698209187778931
ARHGAP26	712.580226725066	0.0159555812754556	0.0979466693740358	0.162900702774536	0.870596617486102	0.909328003767572
ARHGAP27	364.195599061801	0.0472838969641608	0.103838393319575	0.455360444750325	0.648849947361632	0.735188851647655
ARHGAP28	33.91181962211	0.417444028451126	0.26303669280936	1.58701823685745	0.112508514307208	0.185611698128689
ARHGAP29	707.856943483054	-0.25950711328099	0.115536709624636	-2.24610095028753	0.0246975425023264	0.0524125084912318
ARHGAP30	479.266027661382	-0.00632067092241365	0.145088417578238	-0.0435642694841942	0.965251733464043	0.975477664203103
ARHGAP31	1410.26667223734	0.517659420536688	0.0841351602253178	6.15271212594559	7.61689904731946e-10	1.6664514898661e-08
ARHGAP32	896.693058186822	0.566687185418126	0.0981707897598552	5.77246232615988	7.81214147138008e-09	1.22594722706195e-07
ARHGAP33	1065.76767335476	0.810022569528284	0.125980518502029	6.42974468719332	1.27818450728699e-10	3.70156591462113e-09
ARHGAP36	90.5648975206135	0.289826023148871	0.30165769943585	0.960777807730064	0.336663899260666	0.44782274883904
ARHGAP39	500.339431999167	0.515400421597944	0.095447388245904	5.39983786952978	6.67011503326355e-08	7.93355481205104e-07
ARHGAP4	537.705438672589	-0.099945489968793	0.12056906414193	-0.828948044675377	0.407133807204243	0.518609717309661
ARHGAP42	238.453784570527	0.323963240957253	0.0995096494001023	3.25559624529156	0.00113154537740298	0.00373252238943787
ARHGAP5	1749.27298767528	0.304102245747941	0.0807594371440002	3.76553201089928	0.000166194828281892	0.000702597036159272
ARHGAP6	199.941329098505	-0.0246769426232956	0.141310676940474	-0.174629002971167	0.861371157673773	0.902894878446472
ARHGAP8	5.50240427384404	0.223268271849081	0.220779530575087	1.01127251818822	0.311886015566123	0.420745488256031
ARHGAP9	234.183684427453	-0.241721028833372	0.131116410844378	-1.84356044584129	0.0652472249565777	0.118525868042333
ARHGDIA	6478.66694093424	0.0309566628887837	0.0571740145946381	0.541446373991147	0.588199950633236	0.683654618508895
ARHGDIB	3190.12094183752	-0.527730161872862	0.111259217675781	-4.74324890015598	2.10317595149942e-06	1.56757120311105e-05
ARHGDIG	158.70394572521	-0.594466438127191	0.274210131425606	-2.16792295396449	0.030164549079892	0.0620561377528394
ARHGEF1	1311.23902464451	0.228631983475884	0.075550185524045	3.02622663187396	0.0024762662279017	0.00739508001371373
ARHGEF10	909.91378092575	0.28616316633359	0.0899735377923198	3.18052588966905	0.00147008002773178	0.00468923717962545
ARHGEF10L	1351.68346854848	0.447487249416026	0.0885441860233914	5.05382983923766	4.33037450376008e-07	3.93519227264383e-06
ARHGEF11	1142.03001980458	0.509114510523114	0.0871454948143376	5.84212083031688	5.15403995510721e-09	8.51932486697133e-08
ARHGEF12	2808.09593218273	0.339998452645531	0.0744542867423572	4.56653965166663	4.9584128013962e-06	3.32112088716236e-05
ARHGEF15	129.009740023319	0.183963355874801	0.131301331882586	1.40107760703682	0.161190867083099	0.249577526417272
ARHGEF16	18.9940444442743	0.969061475998441	0.274956430852861	3.52441829781032	0.00042441367613391	0.00158058719229493
ARHGEF17	1459.05371852144	0.537517242999145	0.0881883868296146	6.09510234082932	1.09367459954773e-09	2.27646342572528e-08
ARHGEF18	1040.03572556631	0.387835482698984	0.0701126406340633	5.53160570179066	3.17312554741418e-08	4.14418953120528e-07
ARHGEF19	67.1994975471998	-0.193494152312034	0.153283974558249	-1.26232473335629	0.206831960320628	0.304815698959779
ARHGEF2	2432.4595118264	0.42834910776176	0.0851649250191922	5.02964228131746	4.91395744069345e-07	4.38921786303081e-06
ARHGEF3	1295.288257312	-0.0401872464741802	0.0776814993926529	-0.517333558033524	0.604923332037836	0.697412731801298
ARHGEF33	11.8840951749944	0.164071202113279	0.130383999843343	1.25836914276607	0.20825828609108	0.306465675236231
ARHGEF35	11.6672235922473	-0.720370243913605	0.248954363989659	-2.89358351614808	0.00380872986692121	0.0106630268820117
ARHGEF37	351.051359060005	0.122493807141843	0.148725842959856	0.823621535464463	0.410154635568246	0.52147196649412
ARHGEF38	0	NA	NA	NA	NA	NA
ARHGEF4	1573.03588638791	0.607985416811837	0.127381083484348	4.7729647148632	1.81533605357778e-06	1.38159134945166e-05
ARHGEF5	16.5670519570152	-0.585427645614682	0.281851354877961	-2.07707940899616	0.0377942307024376	0.0749301559864004
ARHGEF6	3203.20771057471	0.252946307828001	0.0900625740607199	2.80856183010565	0.00497633255523146	0.0134565674918071
ARHGEF7	2215.27377476416	0.45588247105933	0.101991333540727	4.46981576995745	7.82870006421652e-06	4.93312340416503e-05
ARHGEF9	1229.42497009579	0.413931623086651	0.0884992867529411	4.67723117636193	2.9077438991873e-06	2.08255142504916e-05
ARID1A	2162.8425877431	0.629044121728858	0.0733904661044643	8.57119671148393	1.02415131431995e-17	8.00797271162172e-15
ARID1B	1084.17810745661	0.561864849595761	0.0782884562620434	7.17685437192827	7.13335984848661e-13	5.03083700059542e-11
ARID2	542.119810387058	0.211303112934516	0.0696654188483362	3.0331133642436	0.00242044653894614	0.00725125946300307
ARID3A	59.4532626955869	0.384106366223455	0.121718748099793	3.15568778203781	0.00160120158565742	0.00505737960448008
ARID3B	96.7508970837206	0.404722042703009	0.0998028712443431	4.05521442075695	5.00883342611319e-05	0.000250916045502004
ARID3C	1.10776470279253	0.162681079059947	0.344891599994062	0.471687565202365	0.637149814100909	0.725083987647329
ARID4A	438.27526831183	0.202090852295284	0.0699378812533308	2.88957641658124	0.00385761235326671	0.0107759087544499
ARID4B	721.99824856387	0.263629384714953	0.0605909817247433	4.35096737518771	1.35538220201633e-05	7.93721703714152e-05
ARID5A	937.139099886997	-0.274839091984306	0.0993797842961995	-2.76554325339602	0.00568280681376305	0.0150670201590321
ARID5B	1067.99563704982	0.288549671432039	0.106023649986871	2.7215594960914	0.00649746879930108	0.0168420984270151
ARIH1	1104.19739803873	0.0626834028806315	0.0514395605382005	1.21858356146105	0.223002291392778	0.323060513002073
ARIH2	1841.92132158776	0.19723237889921	0.0560362297103404	3.51972964488748	0.00043198688720396	0.00160347826201775
ARL1	1730.04083001115	-0.545452149817853	0.0704773167014837	-7.73940007007063	9.98870105928218e-15	1.58970619336399e-12
ARL10	84.396499815492	0.624251839079221	0.111127721022562	5.61742680705636	1.93822234761792e-08	2.71471890183495e-07
ARL11	90.3496189475258	-0.64024470444521	0.152895658149566	-4.18746164668005	2.82091671463693e-05	0.000151754011953427
ARL13A	0.264098289081117	0.274121578347506	0.493597951725084	0.555353962449547	0.578652575485427	NA
ARL13B	325.360543566995	-0.0502343242762131	0.0770723827781072	-0.651781123996629	0.51454238031142	0.617437123341602
ARL14	0.0535097753619125	-0.103196389517384	2.10296729653968	-0.0490717994935954	0.960862077067069	NA
ARL15	195.679157181791	0.0341082108218229	0.0875535723535599	0.389569607555094	0.696854829633652	0.774934284945066
ARL16	834.235426047679	-0.441573523799167	0.0965641215799769	-4.57285290410315	4.81127917854479e-06	3.23825017765529e-05
ARL17A	83.0950969923901	0.0765819191214691	0.0928727730857732	0.824589560287398	0.409604650357515	0.52099370761932
ARL17B	1.70593730032386	0.166538710336609	0.25733009604501	0.647179295761346	0.517515909518779	0.620258844495866
ARL2	1436.79103963841	-0.347640978854043	0.0850691255012534	-4.08657050140854	4.37796493058578e-05	0.000223569994778727
ARL2BP	2834.33303881246	-0.275717022622757	0.0663296704424399	-4.15676756395196	3.22782092099335e-05	0.00017073273953866
ARL3	1032.75791766064	-0.281174116603065	0.0928259598991139	-3.02904615162239	0.00245327202492746	0.00733981768362925
ARL4A	1202.05797915861	-0.0665959049055903	0.125848216476395	-0.529176390180163	0.596683093255122	0.69056881067637
ARL4C	2836.18414869957	0.180547800823819	0.129465456491908	1.3945635053247	0.163147506662282	0.251762893411231
ARL4D	261.971036216147	-0.282757301071319	0.127733107837406	-2.2136571000155	0.0268523761576349	0.0562901425362987
ARL5A	1153.40728715672	-0.323411235897391	0.0598972518992297	-5.39943362412509	6.68516120118664e-08	7.94619557449707e-07
ARL5B	122.367284806846	0.515699641004024	0.123890010985572	4.16256029765048	3.14699002901011e-05	0.000166997547010085
ARL5C	0.215353141203802	0.0659630212155034	0.61604993433116	0.107074146979853	0.914730156956775	NA
ARL6	104.014645795559	-0.402840435233975	0.0829227382831011	-4.85802137718444	1.18564611183747e-06	9.54888476277879e-06
ARL6IP1	10072.8851663229	-0.183410007253777	0.0699405552531205	-2.62236990527171	0.00873205983483406	0.0217172402253707
ARL6IP4	2017.5184305113	-0.457381656721637	0.0678323190221764	-6.74282795155662	1.55333109025309e-11	6.48146318494468e-10
ARL6IP5	4374.05029714058	-0.461582767047679	0.0734749348962478	-6.28218000736536	3.33857955632765e-10	8.19113434392857e-09
ARL6IP6	614.398221692909	-0.0479955185396588	0.0726332332772511	-0.6607928130702	0.508745192446614	0.612770312836374
ARL8A	2327.28974278598	0.0864098376547924	0.0646292405944473	1.33700840146057	0.181219894462053	0.274354624295442
ARL8B	2816.72818832131	-0.160097752948647	0.0523831590096163	-3.05628289655568	0.00224099706238758	0.00678299095728423
ARL9	22.7800658452771	-0.638355534276184	0.209714317767373	-3.04392919411579	0.002335100924775	0.00703071405175852
ARMC1	840.961320952762	-0.138112676135212	0.0766676771139548	-1.80144594611792	0.0716326198163676	0.128030315521522
ARMC10	826.429306604972	-0.50070324936989	0.070072905385018	-7.14546152494689	8.96940124700956e-13	6.05575608839831e-11
ARMC2	57.4829124867353	-0.190010187882096	0.127805704030215	-1.4867113273534	0.137091069692487	0.218995007758898
ARMC3	32.3816797272551	-0.0311775318168867	0.595175907909453	-0.0523837262270869	0.958222940902346	0.970908318239848
ARMC4	19.6725076428345	-0.427140147397159	0.384923268013648	-1.10967609103333	0.267138629238943	0.372593540269362
ARMC5	451.933718045683	0.23461934837497	0.0705940848693949	3.32349868702224	0.000888958412488525	0.00301300944029281
ARMC6	987.736322817314	-0.0179862841420357	0.0830178266083847	-0.216655685614144	0.828476685423701	0.877669928761771
ARMC7	366.866316721238	-0.0176129872370275	0.0529991248417705	-0.3323260014125	0.739643108238287	0.808862369021426
ARMC8	814.352585818176	0.0664127289712245	0.0501634634366502	1.32392630853918	0.185527519815581	0.279363357935007
ARMC9	278.138593422058	-0.146586255883565	0.0651320356280544	-2.25060148159143	0.0244107895043857	0.0518978175253426
ARMCX1	745.834090432573	0.062620615877684	0.0594762704741232	1.05286722550851	0.29240184903845	0.399586235038563
ARMCX2	1048.85885098418	0.212329365227305	0.0825464687134895	2.57224044270481	0.0101042689918288	0.0245461533903889
ARMCX3	2108.81059832949	0.198075949536286	0.0579163486158838	3.42003517607743	0.000626130387867395	0.00222053419353327
ARMCX5	218.424385134037	-0.0135175048938582	0.062137269501028	-0.217542627836818	0.827785490110723	0.87728845764222
ARMCX6	269.285199616954	-0.161191365189421	0.0722696309449117	-2.23041633230826	0.0257198163013372	0.054289339948738
ARMS2	0.703861529231898	0.474706304651692	0.42453370160596	1.11818285063338	0.263488907112153	0.368302852907272
ARNT	782.088586923001	0.145584496488665	0.0693381174456228	2.09963151368851	0.0357612683758269	0.0715304916550851
ARNT2	4459.02678534205	0.325254331713126	0.0941079774845177	3.45618235995599	0.000547884520840222	0.00197814800698465
ARNTL	693.050536017284	-0.254014135570271	0.108264384064197	-2.34623914194765	0.0189639356017158	0.0419750668136932
ARNTL2	115.262483538076	-0.161011391924234	0.130652299160032	-1.23236554549274	0.21781256533925	0.31725448894963
ARPC1A	3195.16479183068	-0.295356317117687	0.0645761419698978	-4.57376839352477	4.79029354082109e-06	3.22654078794481e-05
ARPC1B	2202.01000865586	-0.497899918433598	0.131014725708983	-3.80033554044573	0.000144500292701886	0.000621994558150006
ARPC2	4602.16228146665	-0.28869625912646	0.0585188304535376	-4.9333907887253	8.08142366785567e-07	6.80732193174316e-06
ARPC3	2912.50337909261	-0.619815124350448	0.0763674727814052	-8.11621887926829	4.80932952937963e-16	1.23558546080519e-13
ARPC4	4342.41861086426	-0.458549330512202	0.0696882849343624	-6.58000596433242	4.70429397678246e-11	1.59928209600105e-09
ARPC5	4474.36834029285	-0.462981437765758	0.0904977357182449	-5.11594499123383	3.12174037417333e-07	2.95948228197855e-06
ARPC5L	791.033044245715	-0.103294785342696	0.0600380447967264	-1.72048882824926	0.0853436226845425	0.148120026091373
ARPM1	14.7472899515281	0.00747261748594848	0.245298407613602	0.0304633754399232	0.97569750198087	0.982416655037454
ARPP19	5168.02881616964	-0.138388033870313	0.0700705717026726	-1.97498080160568	0.0482703267386083	0.092448728015669
ARPP21	191.771151601607	0.589843584951227	0.202009987279176	2.91987338297322	0.0035017362785729	0.00992204588527731
ARR3	0.0592877512854974	-0.0684319186670924	1.89340219505522	-0.0361423044960064	0.971168890237983	NA
ARRB1	248.05499953758	0.134747391070473	0.127627184064666	1.05578910996108	0.291064574637986	0.398212651980946
ARRB2	1769.77893012254	-0.229063772441137	0.0802347861055386	-2.85491846566192	0.00430478788369391	0.0118592685815489
ARRDC1	387.345045686219	0.020603629459883	0.0585307148278961	0.352013972842566	0.724827783511158	0.796876320984513
ARRDC2	556.813904599974	-0.0328804106245139	0.129452433082646	-0.253996080579824	0.79949858607689	0.854828101709985
ARRDC3	2155.3733879258	-0.162985654896979	0.104613382003489	-1.55798093681307	0.119237767167455	0.194783541169907
ARRDC4	1440.540105586	-0.255482635619046	0.151045832407933	-1.69142459309343	0.0907557385330367	0.155665350670304
ARRDC5	3.18210539736867	-0.260159408498231	0.23288998257911	-1.11709145072334	0.263955225544397	0.368811341480105
ARSA	611.346113762041	0.0286851589564311	0.0973185111092583	0.294755423500331	0.768180721149304	0.831775669164253
ARSB	539.750440998507	0.147660414002179	0.0644544044098595	2.2909282205638	0.0219675654881545	0.0475028095455222
ARSD	897.107563008806	-0.121178833753324	0.109964785659682	-1.10197853818719	0.27047100215901	0.37616417275041
ARSE	108.947149058209	-0.366384604914889	0.139690201549538	-2.62283682642522	0.00872010249979688	0.021690501155788
ARSF	123.485268940465	-0.665443280538215	0.264803939112686	-2.51296594290857	0.011972089191049	0.0283670687762615
ARSG	112.097195450165	-0.219684307312853	0.115705290102593	-1.89865396057573	0.0576099885982809	0.106840591384923
ARSH	0	NA	NA	NA	NA	NA
ARSI	184.091035267325	-0.491639823684956	0.263629938115397	-1.86488616277623	0.0621973623937377	0.113836491480661
ARSJ	336.417745955373	-0.631857591667664	0.203767200727642	-3.10087977560341	0.00192946612310026	0.00595291109244041
ARSK	237.550889178413	-0.331054161876326	0.0755211632739581	-4.38359457832243	1.16736933303062e-05	6.97284032292833e-05
ART1	0.0606464942923954	0.00151986195849914	1.73129111883425	0.000877877753755548	0.999299554983975	NA
ART3	66.7237333399426	-0.759271223792748	0.252029476769901	-3.01262865567884	0.00258995626647069	0.00767470316299371
ART4	0.103000099072795	0.174914915300222	1.5469258319773	0.113072593193847	0.909973003080544	NA
ART5	1.99618624418087	-1.51266301309879	0.371748720055349	-4.06904699732007	4.7205825578679e-05	0.000238603026196449
ARTN	17.7127198883336	0.676369887778343	0.181614756169569	3.72420117199527	0.000195934642980552	0.000811162205193887
ARV1	484.711838613126	-0.473775455099458	0.0711124950067906	-6.66233768136271	2.69505906549047e-11	1.00140376516076e-09
ARVCF	639.544117269138	0.75313383134174	0.119704255352415	6.29162120531539	3.1416736637816e-10	7.79308402337219e-09
ARX	133.915812583218	0.246435798330346	0.233203066515971	1.05674338683479	0.290628718028755	0.397797919554694
AS3MT	218.889856044948	-0.103356731632867	0.110383079584539	-0.936345787976587	0.349095180405127	0.460761482364687
ASAH1	4858.2792407754	-0.254897895548404	0.0782907518438009	-3.25578551163942	0.00113079140356972	0.00373071961141035
ASAH2	4.12814760941357	0.417396186212512	0.250698731323458	1.66493138600681	0.0959264456061485	0.162918235695625
ASAH2B	2.50634690808631	0.366981141459481	0.429426222395691	0.854584844428362	0.392781020735705	0.504841955226309
ASAM	39.9928637184466	-0.359974362841274	0.295504831793226	-1.21816743454523	0.223160352153971	0.323211385450351
ASAP1	1686.17625971734	0.432320702976438	0.078675434099171	5.49498973760341	3.90733135955117e-08	4.962073464904e-07
ASAP1IT1	0.135738308699702	0.418682115156228	1.9608967816863	0.213515631759147	0.830924797842457	NA
ASAP2	879.290501250565	0.235145390556304	0.0866064747737963	2.71510174234051	0.00662554122010897	0.0171173298811147
ASAP3	1277.97949690531	0.228816117677445	0.0945153154295685	2.42094222124197	0.0154803375714502	0.0353162997443817
ASB1	653.962338088229	0.401130663645121	0.0677898242359011	5.91726956319035	3.27329987587592e-09	5.7451547306602e-08
ASB10	0.0412857333724554	0.0371259340217932	2.7168007416519	0.0136653135626058	0.989096996630175	NA
ASB11	0.156504534242365	0.207981968339665	1.77976825643298	0.116859016665744	0.906971775530522	NA
ASB12	0.914576735972426	0.544865309606719	0.499947590375465	1.08984485593284	0.275781491042088	0.381629296314321
ASB13	451.501940379408	0.0269418178170182	0.0894447993000201	0.301211674997991	0.763253087647848	0.827959929397032
ASB14	8.70503253917742	0.421222365874452	0.108874760080271	3.86887066905031	0.000109340616942161	0.000488057000518201
ASB15	0.0309790027866991	-0.172303589720545	2.90284728369466	-0.05935675317416	0.952667958258896	NA
ASB16	17.7007900021031	0.600272107786261	0.137416805329986	4.36825835344372	1.25241287747977e-05	7.41877246001193e-05
ASB17	0	0	0	0	1	NA
ASB18	0.012445290994106	0.0731594875310794	2.90284728369466	0.0252026649634713	0.979893311299146	NA
ASB2	19.9525480462629	0.629114329641933	0.215801356890831	2.91524733072085	0.00355406761015713	0.0100513212613722
ASB3	714.39836516773	-0.18306054315482	0.0680706780896347	-2.68927162608499	0.0071608125476809	0.0183108279336689
ASB4	2.27776184998462	0.599190199665853	0.356610459010675	1.68023731364513	0.092911152111017	0.158726527934315
ASB5	40.4506917759554	0.0829821122238831	0.27025448183557	0.30705175233457	0.758803980890308	0.824751045106449
ASB6	1037.26864219747	0.0931457116232471	0.0593666433813144	1.56899070451008	0.116650104978405	0.191129326524384
ASB7	359.860218425286	-0.0310687051045226	0.0451286345120105	-0.688447710427711	0.491170887890022	0.596718046869835
ASB8	793.508138337537	-0.106378869382098	0.0469631680966219	-2.26515530560533	0.0235031507509911	0.0503131369010622
ASB9	28.4750304238568	-0.494033531815965	0.182263508382773	-2.71054549646022	0.00671726323674756	0.0173343753837951
ASCC1	664.999204835036	-0.0736251394847073	0.0793124325745253	-0.928292539956153	0.353255842724752	0.46504304776824
ASCC2	1026.43287552998	0.170991747794146	0.0687274475573927	2.48796883736086	0.0128474989926217	0.0300806433906142
ASCC3	895.781017298033	0.170182868168542	0.0825501215921966	2.06157016956629	0.0392486765072741	0.077353227211706
ASCL1	1008.88489029408	0.507486875836383	0.211630736199139	2.39798284951791	0.0164856371066339	0.0372646678891031
ASCL2	20.3536666447626	-0.386436224711271	0.147824858711258	-2.61414912268636	0.00894499854579326	0.0221366249962221
ASCL3	0	NA	NA	NA	NA	NA
ASCL4	0.203732033513752	-0.143467327835761	0.742996964309493	-0.193092751016947	0.846886329677828	NA
ASF1A	653.391248202268	-0.124325896837604	0.081264156155127	-1.52989833057856	0.12604189666775	0.203923918072434
ASF1B	493.74845121456	0.111872937715836	0.142724785640027	0.783836789203497	0.433135883920745	0.542596526639084
ASFMR1	0.268087107468139	0.0290794962524357	0.699929470834643	0.0415463235427983	0.966860363865643	NA
ASGR1	69.708192547833	-0.251614083244656	0.122092145632051	-2.06085397174479	0.0393169736227463	0.0774793396484187
ASGR2	12.3656768991859	-0.612315677102392	0.234439799309786	-2.6118247793468	0.00900603995050309	0.0222540014385611
ASH1L	1392.66439733827	0.441955294496492	0.0806426437561972	5.48041673624483	4.24325174875093e-08	5.31781459578653e-07
ASH2L	1076.25536092822	-0.080841279724543	0.0410483491245627	-1.96941610195399	0.0489053282000042	0.0934658259669369
ASIP	12.7624892070875	-0.513001684543942	0.18114792468485	-2.83194900210107	0.00462652269326891	0.0126218725903744
ASL	635.326801498992	-0.541873975615232	0.0937450650001726	-5.78029334786033	7.45704847574416e-09	1.17760353180592e-07
ASMT	0.323683280477513	-0.00780372863835458	0.486927489341929	-0.0160264696677962	0.987213274663796	0.991126195028957
ASMTL	752.088224617035	0.100968429813274	0.0779472408866775	1.29534321760107	0.195201856731356	0.291401194609173
ASNA1	3026.7940177821	-0.492876097230951	0.0872822075667119	-5.64692519783295	1.6334285745035e-08	2.34068362421282e-07
ASNS	1302.46676570393	0.0793094336066237	0.100016475119705	0.792963694348373	0.427798975574366	0.537821515325369
ASNSD1	1257.59038800754	-0.337626799266675	0.0630574086690785	-5.35427646636291	8.58994381051785e-08	9.81458383026385e-07
ASPA	74.4436553073801	0.0971651503697603	0.221835465484026	0.438005483738834	0.661382308238751	0.745864390253069
ASPDH	26.8578412833246	-0.365383559451284	0.255096890633501	-1.43233247000345	0.152048694755781	0.237984658528108
ASPG	0.117340099389154	0.139304679943702	1.182575979734	0.117797657259228	0.906227985860547	NA
ASPH	2822.270668015	-0.112340090142221	0.0915457241503219	-1.22714732102347	0.219767224801342	0.319584824589278
ASPHD1	246.87821451071	-0.0157546100200634	0.162911500437008	-0.0967065552634523	0.92295943388716	0.946053146709985
ASPHD2	257.731019128524	0.116978508698693	0.131668682745072	0.888430766222354	0.374309082017559	0.485964086846937
ASPM	326.981028363756	0.753789904385684	0.159473589046342	4.72673819466519	2.28155121118022e-06	1.6795504290571e-05
ASPN	89.4844398608076	-0.459332237369621	0.205811153154231	-2.23181411857406	0.025627250808745	0.0541257167991157
ASPRV1	112.274129777427	0.330914515143412	0.108505913135681	3.04973715791527	0.00229041719662463	0.0069149370744829
ASPSCR1	462.774460864063	-0.11657451395088	0.0637592226248611	-1.82835532102966	0.0674962421985918	0.121762706359663
ASRGL1	735.640764809965	0.357275799394282	0.119757154100072	2.98333575208154	0.0028512502456028	0.00833363959319369
ASS1	631.056661082789	-0.763085676358387	0.212538357565809	-3.59034333895287	0.000330242669977227	0.00127039233729849
ASTE1	228.804828002731	-0.0679685560573027	0.0546848695954431	-1.24291337915098	0.213899754926644	0.31266952715604
ASTL	0.167583006321313	0.24274705542369	1.4299604729121	0.169757877942834	0.865200554560386	NA
ASTN1	2823.76984790173	0.290217653239122	0.124559716408703	2.32994792864545	0.0198089034110783	0.0435026644211543
ASTN2	1149.42033084009	0.461155418981675	0.13354654436671	3.45314377971003	0.000554093584169521	0.0019981590169851
ASXL1	1548.15329978378	0.157997151690862	0.0665276410276636	2.37490987580882	0.0175532354967489	0.0393171487325361
ASXL2	292.812952643071	0.60409047260393	0.113577764391223	5.31873889085472	1.04488961211387e-07	1.15468049601956e-06
ASXL3	49.3117377493641	0.837736009186487	0.196479775749928	4.26372641147925	2.01045585395521e-05	0.000112076993420739
ASZ1	0	NA	NA	NA	NA	NA
ATAD1	682.353311119597	0.137733513451089	0.0862554608565573	1.59680920005911	0.11030824454996	0.182769805600377
ATAD2	718.497836750621	0.451925016797212	0.102913380471579	4.39131446976436	1.12667450002333e-05	6.76305547677553e-05
ATAD2B	201.45198921457	0.431968789472886	0.0841586076554449	5.13279391742573	2.85472430743927e-07	2.73372534318359e-06
ATAD3A	540.956244941727	0.309326535991858	0.0809585473514621	3.82080146088826	0.000133018703561124	0.000578806766233547
ATAD3B	222.520408055653	0.352438037905406	0.107558497695541	3.27671030607947	0.00105024065571864	0.00349510139756551
ATAD3C	64.9881147745896	-0.301242307673384	0.215552775864403	-1.39753388220287	0.162253085165218	0.25072688465469
ATAD5	83.5174824873215	0.605461244338811	0.130503421318047	4.6394281331771	3.49374601910872e-06	2.44671060777458e-05
ATCAY	1668.95622191317	1.41944415716512	0.275962500978263	5.14361245507385	2.69505205562441e-07	2.61868498781568e-06
ATE1	122.694521037706	0.43833803316178	0.10039659340973	4.36606480633136	1.26504960583613e-05	7.48622971745866e-05
ATF1	281.649332410039	-0.272951746217099	0.0697698391263763	-3.9121739369743	9.14689916886894e-05	0.000419423341797397
ATF2	473.471231819211	0.202319080555513	0.0673083588270219	3.00585371685351	0.00264836371418652	0.00781943408897232
ATF3	1057.95756476521	-0.00107647589828532	0.154297228429044	-0.00697663794253021	0.994433493456252	0.996095129013993
ATF4	5515.7734422061	-0.0852070146445315	0.0807337905179387	-1.05540708664731	0.291239183188295	0.398390923439439
ATF5	1032.63931785447	-0.026491895782667	0.10890346446056	-0.243260358280532	0.807803711621801	0.861606188826669
ATF6	1052.00626339485	0.0627878054983073	0.0562542564299631	1.11614319489723	0.264360845178401	0.36929201799661
ATF6B	1661.01812206308	0.112600890675628	0.052425569129479	2.1478239062609	0.0317277471322817	0.0647369871144717
ATF7	1114.1799868749	0.29478144169444	0.0664152624970038	4.43845933316515	9.06050987157367e-06	5.60716481522301e-05
ATF7IP	723.981628365242	0.557967916019463	0.0926776461386491	6.02052317108619	1.73854214952534e-09	3.34809942872335e-08
ATF7IP2	32.6249950879118	0.0684600961499105	0.15158166491637	0.451638370562039	0.651529522959155	0.737620833547211
ATG10	115.526981900289	-0.274918617483546	0.0760528874142947	-3.61483471345328	0.000300539302346651	0.00116842353614744
ATG12	721.087463348228	-0.275213242624462	0.0621248243645253	-4.43000435718922	9.42311843148523e-06	5.79963592990521e-05
ATG16L1	557.991430844408	0.0203582489758023	0.053569505355078	0.380034290793996	0.703919960995084	0.780282086941296
ATG16L2	333.27140481459	0.335799044890778	0.128459446155747	2.61404711712401	0.00894766962210534	0.0221401885641088
ATG2A	744.107613215397	0.314633934065216	0.0742795542888993	4.23580805077927	2.27731257699443e-05	0.000125168671713533
ATG2B	551.985968478834	0.404209740704447	0.0779986662110413	5.18226477887167	2.19207725671592e-07	2.19012874359883e-06
ATG3	1152.7806951048	-0.255896123502239	0.0573009765259637	-4.46582482562561	7.97608541046095e-06	5.00669877911797e-05
ATG4A	292.152013412518	-0.349531222365705	0.0720661768311328	-4.85014243484478	1.23372848568316e-06	9.88742116155344e-06
ATG4B	1433.21458062665	0.0317339919544778	0.0564935632678337	0.561727568927246	0.574301647881162	0.670882808411486
ATG4C	336.682812576182	-0.218299102400866	0.0655518076309286	-3.33017669977827	0.000867908875449997	0.00295335349405729
ATG4D	411.94366838833	0.0190594559928039	0.0835336725679793	0.228164947222851	0.819518010794593	0.870332579787999
ATG5	778.644838408978	-0.337721198319979	0.0736787415124748	-4.58369933290457	4.56820982170617e-06	3.10134712848485e-05
ATG7	952.234404249321	-0.235364947032419	0.0586255331923768	-4.01471738022544	5.95170680594412e-05	0.000290383871942754
ATG9A	1944.53609972618	0.282130858074497	0.0612700749759674	4.60470887599142	4.13043264285761e-06	2.83193673843505e-05
ATG9B	75.451330768388	-0.178792632637242	0.228327158152957	-0.783054604995646	0.433595046949778	0.543020426486407
ATHL1	330.158994606789	0.0452613556332177	0.152592871821428	0.296615137345242	0.766760352780833	0.830687842434368
ATIC	1293.9846673919	-0.0886525180815223	0.0590335610489884	-1.50173082067597	0.133166640794434	0.213570703485644
ATL1	481.407871417515	-0.0853032379329557	0.1010659206978	-0.844035628864681	0.39864949640836	0.510421387842668
ATL2	543.902307305649	-0.166850245738586	0.0674666810748546	-2.47307623674959	0.0133955563801375	0.0312321731821415
ATL3	294.60352532791	-0.0532620146781906	0.093969076845996	-0.566803638663819	0.570847598183643	0.667976004016829
ATM	872.777607997945	0.22780392184364	0.0692790110708541	3.28820978132406	0.00100826678846225	0.00337603238199684
ATMIN	1397.99008230724	0.145690474307454	0.0537179098378323	2.71213967087095	0.006685041821951	0.0172586552003972
ATN1	5986.76033501904	0.257438171674417	0.0858968198949138	2.99706289463763	0.00272594466985867	0.00801428624206937
ATOH1	0.130129543261385	0.0689279263536023	1.66088633244426	0.0415006885222325	0.966896743967145	NA
ATOH7	5.64743282038102	-0.412835261855656	0.224875083954935	-1.8358426135747	0.0663809369922657	0.120196815431827
ATOH8	373.360449442539	0.305345805930064	0.152773580730134	1.99868200032203	0.0456427717508703	0.0881580503885352
ATOX1	943.286286112388	-0.551946038071011	0.085331128543828	-6.46828475715658	9.91215785646942e-11	2.98094058345729e-09
ATP10A	237.614182003916	0.490113726936185	0.141165161509478	3.47191702042772	0.000516756038938312	0.00187858108030455
ATP10B	204.405751443494	1.32400412997767	0.258350488228575	5.12483695717368	2.97795328199257e-07	2.84114121078803e-06
ATP10D	550.131110963164	-0.0679670613200172	0.0857963506261339	-0.792190586475996	0.428249556621398	0.538128741821405
ATP11A	1056.1072998553	0.441640875728493	0.100295777862325	4.4033845206797	1.06575024453909e-05	6.45117886159237e-05
ATP11B	530.106378391611	0.172184417683792	0.0765542147712392	2.24918272884539	0.0245008728372129	0.0520585653478778
ATP11C	278.558818566883	0.0425141147520978	0.106763027862546	0.398210088297922	0.690475330198167	0.769839326614001
ATP12A	0.787648120450789	-0.920087923361276	0.561854836560011	-1.63759010956383	0.101507227635168	0.170528349536745
ATP13A1	1718.50748068741	0.224501736955481	0.0765475419684581	2.93284057439739	0.00335876314086278	0.00957577620882629
ATP13A2	1663.2700956689	0.21066717442743	0.0734122566096632	2.8696458078868	0.00410931822030049	0.0114031727054363
ATP13A3	1356.00855273953	0.0433151050425912	0.101710089481826	0.425868321061019	0.670203799670027	0.752979642235633
ATP13A4	530.13425853279	0.147371847778572	0.186844152088324	0.788742094046951	0.430262759855505	0.539967048962815
ATP13A5	41.5379265574058	1.13065634570313	0.296842873279276	3.80893882751021	0.000139564477830839	0.000604074023901279
ATP1A1	10957.5567330508	-0.0225689466180257	0.0871730539568302	-0.258898198395141	0.795713788280163	0.852721334586462
ATP1A2	11119.0023046634	0.100394259516992	0.21200250983388	0.473552221601803	0.635819253240474	0.723707180397258
ATP1A3	2200.17350333868	0.748097155588596	0.251778983526968	2.97124543561623	0.00296594646054643	0.00861996142845275
ATP1A4	1.76715402190399	0.876705609419843	0.452988497083914	1.93538161578844	0.0529434836049714	0.0998150339817387
ATP1B1	2656.95458034635	-0.0863814950074542	0.147591808644701	-0.585272961966346	0.558364192155848	0.656916239155486
ATP1B2	13100.3997915741	-0.21076978027792	0.142235120169812	-1.48184063138756	0.138382704980627	0.220529425464917
ATP1B3	2573.32410486722	-0.268735793577129	0.0670701477705653	-4.00678696126367	6.15503329834454e-05	0.000299410654145059
ATP1B4	0.75717288593023	1.76101862732009	0.550597208591865	3.19837914148501	0.0013820244894458	0.00444303332466808
ATP2A1	17.7560016701707	1.01343171073934	0.190335983912857	5.32443571575684	1.01266906004843e-07	1.12976677269919e-06
ATP2A2	7007.07541082766	0.347016995110921	0.0671497386492439	5.16780857366491	2.36854713914957e-07	2.34043690936626e-06
ATP2A3	106.598242733433	0.233499403537555	0.1711090658183	1.36462321514576	0.172371504367223	0.263263620767739
ATP2B1	1661.868797893	-0.0578941130316575	0.0979300290488493	-0.591178350440179	0.554400926997298	0.653578909938998
ATP2B2	780.347202265562	0.641459621762959	0.176413785788189	3.63610824912021	0.000276788055669376	0.0010906565278611
ATP2B3	56.8763335817311	0.568468565194052	0.316983055537079	1.7933720912333	0.072913447075066	0.129867825314251
ATP2B4	4740.14438394675	-0.025430029050197	0.13794717779052	-0.184346134930095	0.853741923612497	0.896670837718107
ATP2C1	2394.64038186356	-0.0545223656392308	0.0500724059934122	-1.08887049778283	0.276210997822137	0.381988510061005
ATP2C2	17.3994700879272	0.586999108280087	0.249547378658346	2.35225515666003	0.0186599699555701	0.0414144020339348
ATP4A	0.125697851116717	0.0341659447183062	1.11404683101649	0.0306683200087128	0.975534056243045	NA
ATP4B	0.51496922820804	-0.958295137155493	0.511248459362885	-1.87442156471183	0.0608723435134087	0.111866771484278
ATP5A1	10173.6386369118	-0.249866780953413	0.0678201576859962	-3.68425538186277	0.000229372183205039	0.000929118272483589
ATP5B	12507.9027977106	-0.282703856697176	0.067154729388849	-4.20973860322217	2.55666312391934e-05	0.000138616308774692
ATP5C1	2582.69006513823	-0.345361149922406	0.0908457281248878	-3.80162234428492	0.000143751725357062	0.000619513785962473
ATP5D	1568.8586052043	-0.319028349186832	0.0845266527947193	-3.77429294357155	0.000160462117496372	0.000681727077971828
ATP5E	3516.56986475608	-0.786507638186191	0.0784919841717291	-10.0202287722199	1.24215089475219e-23	5.58471042280584e-20
ATP5EP2	217.313671238841	-0.716156498427681	0.0897077556647255	-7.98321720481171	1.42567710477328e-15	3.12675329905398e-13
ATP5F1	4004.07966618555	-0.572317787960986	0.0744984149862089	-7.68228140245579	1.56280072494869e-14	2.24231647316065e-12
ATP5G1	1165.47981430493	-0.626838545038169	0.101009324058811	-6.20574932937086	5.44368897181085e-10	1.24237693488637e-08
ATP5G2	4213.36932838401	-0.452432789033369	0.0795758643564827	-5.68555293357001	1.30390088397912e-08	1.91736332767624e-07
ATP5G3	3679.5592289211	-0.617707067818802	0.0970217107074507	-6.36668909788008	1.93152132366073e-10	5.1255666845566e-09
ATP5H	2037.24513106803	-0.616809343157566	0.0732027801800819	-8.42603712099717	3.57568788380697e-17	1.87528104476491e-14
ATP5I	1684.9569960736	-0.625815255075999	0.0881033580343786	-7.10319412379039	1.2190597973998e-12	7.82984692729928e-11
ATP5J	2098.9492905473	-0.627584277615349	0.0792038929343899	-7.92365443621844	2.30630001030444e-15	4.71323856651307e-13
ATP5J2	3478.66932064021	-0.889703395127133	0.105151685354865	-8.46114251164468	2.64770602717948e-17	1.70058375688556e-14
ATP5L	2705.04511581947	-0.657279069689538	0.0902926406134662	-7.27943124958859	3.3523045469671e-13	2.7403565896662e-11
ATP5L2	0.176972992545761	-0.0374805562603042	0.831903692069335	-0.045053960713977	0.96406429815793	NA
ATP5O	3664.1955057596	-0.630696236047012	0.0900109093067148	-7.00688661968624	2.43679574146956e-12	1.40459405815989e-10
ATP5S	167.304223134122	-0.258031729117777	0.0876094382808195	-2.94525035408507	0.00322693439999653	0.00926012258649078
ATP5SL	1001.57057939052	-0.254902278114288	0.0719262590055197	-3.54393905144888	0.000394196361517307	0.00148434408825947
ATP6AP1	4938.08328538353	-0.0207181361445845	0.0515477529205679	-0.401921227808125	0.687741999572379	0.767648468241662
ATP6AP1L	49.7884956888908	0.145987643556565	0.103847616358793	1.40578713961212	0.159787341994531	0.247896442238583
ATP6AP2	4791.30566636895	-0.357414770996477	0.0544499121070769	-6.56410189044224	5.23473998381225e-11	1.74013981273345e-09
ATP6V0A1	2594.39680863873	0.19614835539618	0.0734644709504788	2.66997574281043	0.00758567268664329	0.0192657446118617
ATP6V0A2	656.602643565507	0.0834755000948736	0.0630794454241433	1.32333915641757	0.185722615629268	0.279594468397519
ATP6V0A4	13.6155380919656	3.64478502266907	0.543391061936431	6.70748063039626	1.98013233561588e-11	7.77526199207772e-10
ATP6V0B	3930.86768662769	-0.701753807530581	0.0997901721655529	-7.03229378506698	2.03165450012193e-12	1.21790915100643e-10
ATP6V0C	4743.4646408065	-0.183301098014289	0.0678846762775489	-2.70018372430408	0.00693011939769026	0.0177841420159905
ATP6V0D1	2542.96123302997	-0.189748947237944	0.0568983197777773	-3.33487786597267	0.000853368710868476	0.00291103620945726
ATP6V0D2	10.3185854532011	0.189516905005055	0.321707074959576	0.589097721984725	0.555795721464429	0.654930826044044
ATP6V0E1	4072.14874716418	-0.693562063812356	0.0842088098297005	-8.23621738883354	1.77740844839589e-16	5.51119198895718e-14
ATP6V0E2	6513.39011043359	0.0102405865812601	0.107245050565108	0.0954877313899263	0.923927434664393	0.94655981457243
ATP6V1A	2041.03181447237	-0.0537995045048067	0.064711037050716	-0.831380657099382	0.405758622713151	0.517345839835045
ATP6V1B1	63.8236423849394	0.539595140324173	0.196671889056216	2.74363124752382	0.00607637524294998	0.0159227061589993
ATP6V1B2	4030.86715153701	-0.160672310364178	0.0667409284730842	-2.40740298404711	0.0160664303220657	0.0364637409025783
ATP6V1C1	1455.43636845481	-0.0134158586308247	0.0581741145438874	-0.230615605170983	0.817613443197542	0.869336653805403
ATP6V1C2	97.884992811196	-0.288705606685206	0.0775762487272685	-3.72157214897302	0.000197986278704675	0.000819090231475703
ATP6V1D	1503.04194573673	-0.28534367000831	0.0636029301863197	-4.48632899730277	7.24608234733746e-06	4.61984581902229e-05
ATP6V1E1	2589.46469823347	-0.333517767370434	0.078165230996504	-4.26683018931206	1.98269958983806e-05	0.00011081126519761
ATP6V1E2	85.2376083266535	0.073083301002871	0.110483867081296	0.661483915557507	0.508302026278111	0.612383831548908
ATP6V1F	3805.01050464739	-0.644914185514998	0.0928031773685823	-6.94926837422409	3.67185448826411e-12	1.90851535020063e-10
ATP6V1G1	2166.44213669596	-0.434654280231983	0.0765991986822029	-5.67439722229067	1.3917784577027e-08	2.03493851896955e-07
ATP6V1G2	765.756562548728	-0.0237421771772412	0.168535352542136	-0.140873572334359	0.887969820137919	0.922197615824425
ATP6V1G3	0.0914460648729275	0.525084246330163	2.90284728369466	0.180885935432969	0.85645710864365	NA
ATP6V1H	1197.64170015594	-0.159846367465192	0.0598804190842544	-2.66942633184115	0.00759809387371605	0.0192918424713976
ATP7A	267.099244182426	0.164832633421363	0.0821884921082538	2.00554395382088	0.0449049267253555	0.0869009149067893
ATP7B	89.5568324168886	0.373661193204051	0.110115092643013	3.3933694667582	0.000690384530881377	0.00241789199676158
ATP8A1	570.180349972657	0.5427090922714	0.176499852983576	3.07484161089869	0.00210614370778986	0.00641654894814378
ATP8A2	19.9321791841906	0.83576606253835	0.345629302403708	2.4180995555815	0.0156018075474048	0.0355528265246487
ATP8B1	84.8121084876115	0.0527105653372233	0.169237350551582	0.311459409908202	0.755451395541963	0.822399388464084
ATP8B2	691.376133477166	0.377275325819915	0.088987638348662	4.23963746898995	2.23881057392402e-05	0.000123391876682346
ATP8B3	36.4772411133943	-0.34263828612194	0.134748900089934	-2.54279096818792	0.0109970996326748	0.0263780151970156
ATP8B4	151.584769043677	-0.203516454475889	0.153829062138627	-1.32300393466928	0.185834069348371	0.279668611143189
ATP8B5P	9.20794346399859	-0.455786982140525	0.12178452734605	-3.7425688802438	0.000182148581411035	0.000760037143409759
ATP9A	2819.15377122721	0.31505917786409	0.104044512060504	3.02811913501866	0.00246081053080515	0.00735625275698137
ATP9B	461.568167808112	0.213283795797313	0.072874643544427	2.92672163353071	0.00342555332456365	0.00973378906445768
ATPAF1	1771.4878644366	-0.197464558564427	0.0744055589821829	-2.65389523666789	0.00795685262710996	0.0200433799571211
ATPAF2	379.344044168682	-0.237982951267006	0.0543723547893376	-4.37691088033719	1.20373162860083e-05	7.17320186302162e-05
ATPBD4	197.549883903192	-0.550175335080789	0.0985956401217155	-5.58011829327952	2.4035506363351e-08	3.26970156156206e-07
ATPIF1	1486.84911284121	-0.323182533784854	0.0698768772857947	-4.62502828314788	3.74547288955416e-06	2.59670718757679e-05
ATR	465.130267647325	0.153445746711041	0.0622743023149388	2.46402996110695	0.0137384626813565	0.031888553544336
ATRIP	223.797905121355	0.0955528484192168	0.0618470734800168	1.54498576961916	0.122349705482779	0.19886886803731
ATRN	1859.51460956863	0.095611331626672	0.0774745216891751	1.23410031507211	0.217165526152974	0.316491476688418
ATRNL1	302.801215597832	0.54804643260832	0.215918013637164	2.53821542434748	0.01114193765098	0.02667923536155
ATRX	1246.36505331564	0.210321602965637	0.0775095002089118	2.71349450581872	0.00665776722450672	0.0171931771633442
ATXN1	1088.81234564667	0.168834200241579	0.0700392569930885	2.41056526710784	0.0159278211968152	0.0361994106411633
ATXN10	3177.75475951961	-0.007939777569759	0.0684206041294591	-0.116043663612442	0.9076179369684	0.935928955185762
ATXN1L	912.141500687876	0.411840116816092	0.0768901501984376	5.35621423229396	8.4983738685296e-08	9.72231270048577e-07
ATXN2	965.880222397614	0.28782987322222	0.0570046751764181	5.04923275733866	4.43588003613119e-07	4.02091061339633e-06
ATXN2L	2519.76016824711	0.413116763792106	0.0637425954834784	6.48101572674716	9.11071738322829e-11	2.80080583623893e-09
ATXN3	218.4335154562	0.144117346865383	0.0651126728155057	2.21335326340748	0.02687330014352	0.0563143124890542
ATXN3L	0	NA	NA	NA	NA	NA
ATXN7	352.337452863887	0.346038431572974	0.0851932665341037	4.06180494833417	4.86947557614187e-05	0.000245095574478968
ATXN7L1	169.019444369744	0.281771587034237	0.0745371783457536	3.78028244813871	0.000156650547073868	0.000667583753217167
ATXN7L2	207.961818475989	0.317828772884487	0.0959822683218324	3.31132800298899	0.000928543011845162	0.00313124273861305
ATXN7L3	1165.45771556768	0.138957882258484	0.0549193708636392	2.53021620738347	0.011399225923554	0.0272104697384119
ATXN7L3B	2669.93173935458	0.0389678865621267	0.0725562993311557	0.5370710320309	0.591218549542402	0.686098883330358
ATXN8OS	0.0355561702082474	0.212213259469257	2.90284728369466	0.0731052097233161	0.941722395994259	NA
AUH	190.114571041526	-0.234857942689461	0.067387418600175	-3.48518978123984	0.000491788104024314	0.00179835649914056
AUP1	3015.06802720638	-0.334748040257723	0.0602101207937768	-5.55966398745909	2.70294524590809e-08	3.62218832357757e-07
AURKA	326.247750912717	0.0681067787577157	0.119592803572619	0.569488938490851	0.569024375336115	0.666232706122701
AURKAIP1	1545.4324121076	-0.318566736811121	0.0733927347806801	-4.34057591344833	1.42109761362073e-05	8.26820429742973e-05
AURKAPS1	7.90932510313934	0.241970903850777	0.169097304670579	1.43095659816793	0.152442654434397	0.238497494332161
AURKB	287.349855109373	0.314363491856851	0.15955573413221	1.97024252100125	0.048810582454829	0.0933260425701782
AURKC	29.0769589355243	0.112628498884341	0.175851174780329	0.64047623807481	0.521863032522949	0.623931975594517
AUTS2	972.470210623998	0.243178378759362	0.104628411421859	2.3242097959308	0.020114252542302	0.0440656252553002
AVEN	197.891839769986	-0.315483859970671	0.078978123294286	-3.99457276029622	6.48110164107417e-05	0.000312902367551887
AVIL	177.523941920886	0.128944223966829	0.210590339401759	0.612298856315688	0.540340046222151	0.641417517574862
AVL9	257.477982657824	0.167889080182456	0.094217861717323	1.78192411844545	0.0747616068522668	0.132660358917727
AVP	0.0589897784672947	0.0714643064432285	2.90284728369466	0.024618693117149	0.98035910886677	NA
AVPI1	112.210712598017	-0.173047928476847	0.113859665854044	-1.51983520396657	0.128552398892893	0.207455701874532
AVPR1A	9.3691364732378	0.000820697286225998	0.207092422745951	0.00396295178425133	0.996838030232591	0.997614643055254
AVPR1B	0.172516596186378	0.207560047759021	1.2608643439141	0.164617271287641	0.869245236161834	NA
AVPR2	0.708110512931284	-0.422354650010415	0.443980631396236	-0.951290709872158	0.341456821652859	0.452824974604013
AWAT1	0.0185174469808983	0.0379722492745722	2.90284728369466	0.0130810358119295	0.989563141135105	NA
AWAT2	0.266203946929067	-0.110399678610731	0.995680148873103	-0.110878657906035	0.91171256975632	NA
AXIN1	649.164461924091	0.304653245355155	0.0719144308447505	4.23632978494738	2.27203008851958e-05	0.000124916505997971
AXIN2	325.338242350457	0.39665633278781	0.0961717069666308	4.12445973248078	3.7160599511009e-05	0.000193652918460152
AXL	1450.31433343476	-0.0136776889367371	0.10905320406925	-0.125422164836639	0.900189341663087	0.931205356368649
AZGP1	658.720701347662	-1.24481838779994	0.269133879021637	-4.62527568927826	3.74100471579805e-06	2.59460967253807e-05
AZI1	275.833255244934	0.609998052464892	0.10837690631329	5.62848740765439	1.81796771446204e-08	2.56426128446159e-07
AZI2	1004.40481329354	-0.181104951644914	0.060123821067878	-3.01219963116536	0.00259361970898058	0.00768049676375874
AZIN1	4186.88854692326	-0.187531373612848	0.0599216151411997	-3.1296114627576	0.00175037651794311	0.00546221955555942
AZU1	1.46048578606452	-0.139822966152377	0.493623086660946	-0.283258562921343	0.776978638984663	0.838776867969276
B2M	55648.03141197	-0.588400482670183	0.114487012418617	-5.13945180540408	2.75541150757032e-07	2.66092236646645e-06
B3GALNT1	1109.52051202578	-0.287185191652764	0.0828747575904658	-3.46529148322725	0.000529657077678935	0.00192004694315218
B3GALNT2	485.476854563575	0.0649361710901109	0.0737160324758945	0.880896175622926	0.378374017625229	0.490003480447334
B3GALT1	47.0993206814942	0.193684419123	0.169239808366795	1.14443771233318	0.252442155779645	0.355960461779923
B3GALT2	171.863111512031	0.384621322932544	0.206972777154559	1.85831841375605	0.0631238104472925	0.115227223617957
B3GALT4	149.947468790996	-0.342956217955127	0.11019645323274	-3.11222555621447	0.00185682570326903	0.00575248121405516
B3GALT5	8.53682716091944	0.662162052488239	0.228190319453974	2.90179729829335	0.00371028532499454	0.0104291608760084
B3GALT6	747.684520768418	0.171785333432648	0.0708971526440692	2.42302161689167	0.0153920107430967	0.0351638619415461
B3GALTL	690.037224350282	-0.396477573671518	0.123996045396669	-3.19750176227933	0.00138623564321641	0.00445338724680312
B3GAT1	2316.55136416332	0.448050760898659	0.139256902959284	3.217440222907	0.00129339975957331	0.00418730896060602
B3GAT2	344.501463208179	0.454304147844627	0.25582267883704	1.77585564309574	0.0757567136234519	0.134068956682165
B3GAT3	1250.75427225018	-0.206199994084447	0.0653069728230319	-3.15739629584738	0.00159184846479053	0.00503213267547775
B3GNT1	2515.95174190024	-0.258595016069436	0.0783897563150211	-3.29883684075038	0.000970863228453886	0.00326172320203898
B3GNT2	317.396840687764	-0.190256820704504	0.0993242242410225	-1.91551277805928	0.0554271411382123	0.103628413164529
B3GNT3	0.190777786235961	-0.00314183974824459	1.34479827910575	-0.00233629072631906	0.998135911395702	NA
B3GNT4	9.63053100942174	-0.285841617795695	0.242173363317225	-1.1803181567135	0.237873699389562	0.339760194569287
B3GNT5	640.294658906587	-0.401197308287668	0.11428188583527	-3.51059404870136	0.000447106616460112	0.00165618236671857
B3GNT6	0.176083307902606	0.102422221310834	0.799150215299047	0.128163916307659	0.898019255136438	NA
B3GNT7	250.048761150982	0.691982871612748	0.170817396096119	4.05100936688773	5.09971657208495e-05	0.000254264770813351
B3GNT8	16.4371805668717	-0.429881052755694	0.186799984967524	-2.30129061750423	0.0213752097383761	0.0464209361109717
B3GNT9	637.871426940895	-0.0908733207633168	0.113532791534198	-0.800414748332376	0.423470538857757	0.534059899776852
B3GNTL1	82.0636699793201	-0.251916305702062	0.083490758961223	-3.01729567243561	0.00255040914535987	0.00757593643945745
B4GALNT1	721.153197925452	1.45960083806653	0.229089120325613	6.3713232474416	1.87404185220265e-10	4.99300276592777e-09
B4GALNT2	0.023061196500146	0.0727356922591164	2.90284728369466	0.0250566720018907	0.98000976005456	NA
B4GALNT3	35.1546965159234	0.523371168939977	0.242601491326129	2.15732873725995	0.0309800594236348	0.0634200783921057
B4GALNT4	1016.91282102911	0.27984395077717	0.130004165217798	2.15257680635341	0.031351952979215	0.0640865563057743
B4GALT1	908.219642469883	-0.302497213255912	0.170825631157243	-1.77079523258115	0.0765947590185866	0.135272527368188
B4GALT2	1642.22855376983	0.0147412386786574	0.0660082043692959	0.223324340049983	0.823283084963115	0.873774014774701
B4GALT3	903.851982227358	-0.125265230082162	0.0648831133819007	-1.93062915068292	0.053528930248313	0.100697100584274
B4GALT4	600.687388462313	-0.00797616051259504	0.0669962121018809	-0.119053902636551	0.905232651280589	0.934594638075097
B4GALT5	3110.21913361242	-0.229153253195983	0.0874381956358543	-2.62074544802269	0.00877377463581573	0.0218028966492345
B4GALT6	196.519076677243	-0.132631813118936	0.182840360429828	-0.725396804114479	0.468208633140008	0.575659002108372
B4GALT7	667.653131299258	-0.243075809810794	0.0567879642010739	-4.28041070375609	1.86548727857405e-05	0.000105235016367239
B9D1	280.645443571383	-0.714850128350946	0.111244906300529	-6.42591334851569	1.31080059194843e-10	3.75971895464123e-09
B9D2	142.880795946676	-0.675802427683439	0.105290971727894	-6.41842711291458	1.37689501665489e-10	3.93048888563833e-09
BAALC	13250.3499045675	-0.469736480301605	0.131001792593628	-3.58572559200576	0.000336142276901939	0.0012903271521461
BAAT	5.85307020819413	0.719118176050447	0.200035695633052	3.59494926030405	0.000324454805116667	0.00125080283284419
BACE1	2807.90334209621	0.232888182612526	0.0677097255046476	3.43950859166517	0.000582771286644963	0.00208536889091638
BACE2	545.210420772385	-0.291912640048933	0.150305625749075	-1.94212717317887	0.0521217066782608	0.0984928835664434
BACH1	756.465258928224	-0.0227279860568485	0.0804887102935331	-0.282374832121947	0.777656111148897	0.839306697647588
BACH2	184.531185988265	0.761916130121593	0.143064144373314	5.32569592093907	1.00567250652231e-07	1.12335492902467e-06
BAD	1467.4637057168	-0.475138985829834	0.0786782370882524	-6.03901413419922	1.55058663989995e-09	3.04097602311458e-08
BAG1	1139.84234975191	-0.241836738938753	0.0776386699892739	-3.11490058977264	0.00184006912457134	0.00570646717301102
BAG2	156.463383791377	-0.312978182073205	0.124822618111462	-2.50738357205204	0.0121628643819199	0.0287056368824734
BAG3	1143.37338098189	0.168161083845116	0.112764819408205	1.4912548499402	0.135894597979701	0.217392674796917
BAG4	172.60075139348	-0.0117501224342302	0.0797691409829599	-0.147301604222367	0.882893966305778	0.918651069778009
BAG5	1161.57897109261	0.0966792026704881	0.0684912508480179	1.41155551217803	0.158080879434241	0.245651649161444
BAGE	0.116794619467016	0.0693453300834133	2.90284728369466	0.0238887283092456	0.980941365224852	NA
BAGE2	0.109075728713145	0.0697773070603674	1.18194613463465	0.0590359450533979	0.952923478014749	NA
BAHCC1	621.658723268166	0.823244181022028	0.110577154619634	7.44497526504319	9.69625845367663e-14	1.00216960937311e-11
BAHD1	649.470724822468	0.317971959724572	0.0669560311590814	4.74896666095844	2.04458640721448e-06	1.53230893269686e-05
BAI1	1325.18722182869	0.898497403388574	0.256517999219304	3.50266806276009	0.000460623094486245	0.00170064580809703
BAI2	2882.75904690817	0.281854547616302	0.111541167992364	2.52691049134071	0.0115070825897212	0.0274242477197913
BAI3	467.344890306005	0.350983054109786	0.135789358011653	2.58476112744908	0.00974464834047797	0.0238011348302534
BAIAP2	1145.81034307379	0.243091499139202	0.0850209200563222	2.85919628931522	0.00424715891633671	0.0117256533545286
BAIAP2L1	17.9640752587189	-0.313282663386191	0.225061858014471	-1.39198470211708	0.163927030478623	0.252835653184181
BAIAP2L2	19.4031720629062	0.224061176459749	0.15026242442225	1.49113244592752	0.135926725293103	0.217424728957677
BAIAP3	964.746236591359	0.0271492200171354	0.208963368238354	0.129923346115706	0.896627073311144	0.928438793419856
BAK1	367.821315845429	-0.293195955468	0.0715573810260177	-4.09735447642216	4.17898715614871e-05	0.000214851072087417
BAMBI	345.187003849233	0.318731024401142	0.173382201964244	1.83831454895741	0.0660160684707431	0.11970487753356
BANF1	3021.13104807786	-0.517404325086146	0.0794899605088617	-6.50905248630064	7.56262977396555e-11	2.39026948778553e-09
BANF2	0.181739604509919	-0.492376439037532	0.958651483816926	-0.513613599258311	0.607522169733967	NA
BANK1	34.6152561935712	-0.67744548953171	0.274583608897738	-2.46717381365618	0.0136184234450074	0.0316385127548137
BANP	239.522780601369	0.129820539013032	0.0528724930110022	2.45535119719091	0.0140747009411571	0.0325597403814984
BAP1	2312.59810320297	0.247504837895976	0.0559772600937417	4.42152469559057	9.80068602732723e-06	5.9910107925035e-05
BARD1	152.490306240425	0.477013697858705	0.109620063105606	4.35151818330154	1.35198106872924e-05	7.9198786775331e-05
BARHL1	7.17404330367651	0.016624655652344	0.304787140496129	0.0545451347628463	0.956500849748191	0.969746971181902
BARHL2	0.572312095712927	-0.555330235370199	0.746392089720456	-0.744019454410598	0.45686470565463	0.564980475982138
BARX1	15.9132048815102	0.502724530311936	0.364736204821716	1.37832363134246	0.168103390239812	0.25795196699179
BARX2	3.92608448844917	0.063513326479041	0.312328365128367	0.203354333356617	0.838858090705006	0.885856375183382
BASE	0	NA	NA	NA	NA	NA
BASP1	1130.5971539817	0.473601713510343	0.181634652719904	2.60744140183798	0.00912216825952471	0.0225131156826256
BAT1	5425.53859285054	0.22717756907948	0.0562765023879072	4.03681038159713	5.41828269154801e-05	0.000267625366450973
BAT2	6385.20586156952	0.625491750815319	0.0747769745428247	8.36476408198489	6.02353288903699e-17	2.74423393792379e-14
BAT2L1	4782.49296674031	0.694077512709382	0.096934819037337	7.16024973897192	8.05302175385894e-13	5.50667464720149e-11
BAT2L2	2335.09648050653	0.413881354922538	0.0779089315456464	5.31237364845707	1.08206449699284e-07	1.18657609231215e-06
BAT3	3962.86504977442	0.315658624963552	0.0511562996903385	6.17047415224147	6.80855055861119e-10	1.50980238281213e-08
BAT4	486.496807898437	-0.0770485068086603	0.0708887850654367	-1.08689275373443	0.277084209122617	0.382901676414719
BAT5	1201.53963738198	-0.0136872508795525	0.0503545595730062	-0.271817507602427	0.785762342775466	0.845467869598778
BATF	34.8527923837202	-0.64643362790512	0.190466227255241	-3.3939540737521	0.000688912447729384	0.00241320636150472
BATF2	224.464869963602	-0.058622944764422	0.184608224898	-0.317553266095335	0.750823828671716	0.818501287193559
BATF3	179.756166149039	-0.217173534226989	0.180431344183104	-1.20363529524337	0.228730571274884	0.32926363514028
BAX	985.732189265635	-0.324802486191883	0.0767778252377095	-4.23042050470005	2.33254865564804e-05	0.00012796996651365
BAZ1A	560.752299670879	0.322397722423753	0.0850812732891106	3.78929122661609	0.00015107771837619	0.000646900401732716
BAZ1B	2519.15312735582	0.31156684097483	0.0778191711224616	4.00372859901742	6.23518928673557e-05	0.000302573243747038
BAZ2A	1262.65164278862	0.406536459160594	0.0721169342774371	5.63718443155986	1.72852960492272e-08	2.45544047511296e-07
BAZ2B	572.239684063319	0.271709718696872	0.0933081586464344	2.91196099717754	0.00359167479818751	0.0101375417103905
BBC3	124.853220006546	-0.0920828078477014	0.116910020880781	-0.787638280739021	0.430908316429276	0.540370627059765
BBOX1	1170.64021924461	-0.565582261970631	0.150648224147624	-3.75432412277494	0.000173809835833688	0.000729985074178665
BBS1	1052.86367109367	0.018037107073729	0.0796585290612273	0.226430330641247	0.820866739998494	0.871559065540968
BBS10	622.443179046233	-0.311435708248711	0.0807196624140029	-3.85823848780969	0.000114207179760597	0.000506362063246112
BBS12	197.964883242361	-0.483328779776261	0.0858201216741512	-5.6318817818903	1.78253858782712e-08	2.5241869262585e-07
BBS2	2029.8684785037	-0.0349591082952297	0.0834948385750622	-0.418697836798634	0.67543697682422	0.757156304382395
BBS4	671.633621718043	-0.565059494098154	0.0835058089318638	-6.76670882332524	1.31744838631553e-11	5.66817985155466e-10
BBS5	315.630743047011	-0.0603935180786972	0.0759826878897393	-0.794832609321955	0.426710879454234	0.536903970902186
BBS7	301.088689157472	-0.0782162062608819	0.0516989159604448	-1.51291772385954	0.130300559240167	0.209768620300345
BBS9	512.284409721832	-0.213698007283736	0.0778446029774967	-2.74518719487222	0.00604763902760736	0.0158635852206083
BBX	1410.84626772919	0.187396851780312	0.0695984201575007	2.69254462035538	0.00709090464546374	0.0181553002767682
BCAM	1060.85269663606	-0.178171014564061	0.11525559892865	-1.5458773041851	0.122134202751192	0.198613030317156
BCAN	32751.6003962625	0.725795268876386	0.202776975737024	3.57927849667533	0.000344544141573717	0.00131976184069472
BCAP29	2355.92541513733	-0.471257108622678	0.0768556852253213	-6.13171435842479	8.69370937472242e-10	1.86216717639016e-08
BCAP31	4782.070378358	-0.351366793455958	0.0524759309704218	-6.69577055534293	2.14538115640261e-11	8.29731929392355e-10
BCAR1	1479.53110187175	0.457600880179215	0.0812127766751494	5.63459222690557	1.75473035675121e-08	2.49069224434205e-07
BCAR3	363.034346795813	-0.223774952190701	0.13102540214059	-1.70787456886101	0.0876596188929828	0.151191194607404
BCAR4	0.167160136967084	0.0676585717183141	0.760847157359792	0.0889253131379178	0.929141266267121	NA
BCAS1	1594.09023379054	1.0929175095312	0.288447161230049	3.78896954600136	0.000151273454729062	0.000647506438727525
BCAS2	954.117676186816	-0.322576352459781	0.0609725925890497	-5.2905139631165	1.219731090874e-07	1.31351161307053e-06
BCAS3	621.273368378968	0.155766951141311	0.0628673374069256	2.47770873662214	0.0132229038322368	0.0308711803867255
BCAS4	888.74106485645	-0.841979094822236	0.120003012034046	-7.01631634532105	2.27793983790868e-12	1.3300801962646e-10
BCAT1	2494.1288878406	-0.207778966270034	0.173920150308197	-1.19468023631441	0.232211987085709	0.333394569355692
BCAT2	425.218510699532	-0.0816642159959698	0.083780483043371	-0.974740333660935	0.329689080494012	0.440348757449749
BCCIP	752.824161041795	0.0234208536753133	0.0651477877268048	0.359503438144789	0.719218506229251	0.792760330859962
BCDIN3D	241.062381691505	-0.309354088617068	0.0649780169088711	-4.76090381537688	1.9272789063493e-06	1.45814824786646e-05
BCHE	1446.81643622726	-0.0243215501057991	0.153630993606682	-0.158311480872576	0.874211361798629	0.912044154228249
BCKDHA	1027.24760474785	-0.107681899277864	0.0766783992682385	-1.40433160193092	0.160220128032546	0.248417862103398
BCKDHB	634.10614758887	-0.319235831580273	0.0915859678782204	-3.48564129392346	0.000490958866402389	0.0017956892929389
BCKDK	1297.04459169548	-0.0268324404322584	0.0640327000675942	-0.419042776642771	0.675184870098316	0.757015255850879
BCL10	318.036533669487	-0.138922739722601	0.0572408544441567	-2.42698577915415	0.0152248526208917	0.0348439487826566
BCL11A	118.496017080914	0.303451733640683	0.210268963823811	1.44315988495074	0.148975436981438	0.233968584287327
BCL11B	53.9344234537532	0.890867362710817	0.216594769834681	4.11306036332633	3.90448237863679e-05	0.000202416290277902
BCL2	435.799914673063	0.217917576162627	0.0948769152462319	2.29684508183124	0.0216276087815569	0.0468841509555834
BCL2A1	163.339621825888	-0.811976898599844	0.210609946734269	-3.85535873870351	0.000115560044162029	0.000511264925483654
BCL2L1	2839.46891374617	-0.315678521524754	0.0707600189593521	-4.46125546837536	8.14808857846459e-06	5.10416878611684e-05
BCL2L10	0.438261901872793	0.235239275729551	0.471032046056224	0.499412466092535	0.617488838834139	0.708900049638887
BCL2L11	422.697108161225	0.166061670217172	0.0838010839646096	1.98161721019387	0.0475220994926081	0.0912586692231783
BCL2L12	170.420565288792	-0.374358656466288	0.107131484619212	-3.49438503346527	0.000475155206337635	0.00174676844455765
BCL2L13	1198.60485160659	0.0418374898559746	0.0596881138477544	0.700935029756324	0.48334356214935	0.589558506626012
BCL2L14	2.57968859054444	-0.393243300263377	0.316985492051387	-1.24057191929663	0.214763930753064	0.313677782072859
BCL2L15	12.3337336030205	0.111250384632166	0.144767420510036	0.76847666581483	0.442204048363428	0.550650740263245
BCL2L2	824.292074325955	0.344974923220687	0.101016019944785	3.41505162655634	0.000637699235310312	0.00225755571807493
BCL3	462.477296220263	-0.43307270281712	0.161764753299071	-2.67717592358612	0.00742456395769368	0.0188992722172913
BCL6	2064.03349160079	0.326056284974157	0.113231476380479	2.8795551855082	0.00398236595153594	0.0110916631984548
BCL6B	218.41619559992	0.109520883001393	0.126351442245978	0.866795669717653	0.386053975155507	0.497741164602105
BCL7A	548.047817003562	0.715314274334301	0.147027260079295	4.86518128643977	1.14351943870996e-06	9.25519963355532e-06
BCL7B	1635.8165779816	-0.304193367035496	0.0641549488655286	-4.74154172693829	2.120979611846e-06	1.5781422151195e-05
BCL7C	810.489927545425	-0.420179641089525	0.0805207609880972	-5.21827707455022	1.80595167659704e-07	1.84745363776571e-06
BCL8	2.11468315483436	-0.338521111403833	0.388426286971869	-0.871519572073531	0.383470523997258	0.495567203713148
BCL9	763.458074314534	0.501274665727977	0.08368680144027	5.98988917130203	2.09984082254963e-09	3.94191412867772e-08
BCL9L	1046.99354753079	0.554789517876587	0.0905017845627338	6.13015003579316	8.77962377132811e-10	1.87298640455e-08
BCLAF1	2426.99541068106	0.231838649230558	0.0620878523173716	3.73404201590802	0.000188431038192536	0.000784068438420769
BCMO1	65.5755722994443	-0.429885549861424	0.197378138269658	-2.17797955553778	0.0294075588678243	0.0607332956682307
BCO2	43.9187777688077	-0.739647349837758	0.191047642023249	-3.8715335190986	0.000108152781223179	0.000483595131158041
BCOR	519.421204000285	0.791607544535024	0.120457495858028	6.57167525272165	4.97522813768988e-11	1.66619185899841e-09
BCORL1	310.104583224607	0.482427066642529	0.0988990423203249	4.87797510798934	1.07180446728731e-06	8.74164695677774e-06
BCORL2	0.717738710489752	0.730820482438509	0.402926786953289	1.81377983817996	0.0697116277363511	0.125131641202769
BCR	1813.75819046319	0.58399742320566	0.10828190462121	5.39330579055281	6.91730840112067e-08	8.17351342219146e-07
BCS1L	473.926585470497	-0.13965589132957	0.0632100943507854	-2.20939223021164	0.0271473709953016	0.0567785660803873
BCYRN1	0	NA	NA	NA	NA	NA
BDH1	373.86733319663	-0.0943665994998833	0.12519474138201	-0.753758492235228	0.450994252135371	0.559048844113765
BDH2	929.739989371417	-0.508304339980438	0.0988883764684322	-5.14018288228953	2.74471190011904e-07	2.65445873783925e-06
BDKRB1	5.03096428363411	-0.491938344947855	0.337131717065197	-1.45918737409308	0.144513542926295	0.228096503070606
BDKRB2	188.718459149649	-0.349536710860395	0.247947588276996	-1.40972014807383	0.158622333050623	0.246407880934819
BDNF	70.4882163755678	-0.187852688017812	0.27232081002298	-0.689821273673356	0.490306588708694	0.595949830449929
BDNFOS	218.832731948369	-0.358887449648253	0.100349168700389	-3.57638687291748	0.000348375973029463	0.00133216957239249
BDP1	460.678435112855	0.324510720799891	0.0694504434010558	4.6725507413385	2.97481991639608e-06	2.12551296688387e-05
BEAN	84.3449369913901	-0.217884949829597	0.237143030214317	-0.918791286561046	0.358204750929798	0.470009794303334
BECN1	1256.0355855978	1.34319566978343e-05	0.0457585954662264	0.000293539531993463	0.999765789342801	0.999821384393089
BEGAIN	154.081851856926	0.248048184794426	0.178612763459103	1.38874837380376	0.1649092788783	0.254176248829906
BEND2	0.18141504699205	0.137185794454548	0.872728131455116	0.157191901475452	0.875093610644041	NA
BEND3	132.9067633648	0.466163035674694	0.0907002275577985	5.13960161100625	2.75321576537592e-07	2.66060356391836e-06
BEND4	13.6749104331242	1.62443429531706	0.402762883961635	4.03322739011819	5.50159961089648e-05	0.000271144881891922
BEND5	289.076608566974	-0.0323113125141457	0.0963821552439735	-0.335241647505761	0.737442807717349	0.807241551767534
BEND6	475.67463071122	-0.112055421237522	0.0975925248450895	-1.14819676420289	0.250887344786896	0.354101240672386
BEND7	172.386886758663	0.523972793123435	0.102469875637944	5.11343250746966	3.16356821749556e-07	2.99440056965474e-06
BEST1	282.636811751738	0.362134425018156	0.151417870368539	2.39162275982848	0.0167740733735857	0.0378643072110664
BEST2	0.766103634670568	0.535669861640093	0.400752445333453	1.33666024469141	0.181333564348199	0.274434302889676
BEST3	348.847308575593	0.610067328009358	0.21142172620376	2.88554700107499	0.00390734113670919	0.0109080445517818
BEST4	43.4708993531446	-0.486123004515878	0.20317067729948	-2.39268289586552	0.0167256896335158	0.0377787995942161
BET1	603.718374224161	-0.671406410946678	0.0894522581846565	-7.50575138707725	6.10772380720641e-14	6.82244130116771e-12
BET1L	1206.0398863556	-0.132310245151724	0.0626888659187884	-2.11058603808734	0.0348079087801521	0.069911261056763
BET3L	0.379889957259199	-0.742722868638373	0.528370458395196	-1.40568583431826	0.159817435211048	0.247900358360833
BEX1	1923.78317453414	0.0967519401689228	0.173201814800575	0.558608120130399	0.576429197025225	0.672800018127054
BEX2	699.820975529232	0.0889382468536523	0.172346369706182	0.516043633557673	0.605823934546861	0.698137744386182
BEX4	1546.40827705604	0.044831764027954	0.110524164639209	0.405628616821498	0.68501549903369	0.765175076684589
BEX5	136.341372578835	0.0998311956214719	0.217372034672677	0.459264209270524	0.646044446138688	0.732979832146753
BEYLA	0	NA	NA	NA	NA	NA
BFAR	1121.67420713772	-0.237525949669861	0.0472730582593453	-5.02455221675667	5.0460849768197e-07	4.4902915498825e-06
BFSP1	21.7086670855385	-0.413785365933104	0.203053505447446	-2.03781444216533	0.0415684934957063	0.0813634944521965
BFSP2	0.48656136544833	-1.02279218694521	0.595406587114449	-1.71780462137985	0.0858322583121188	0.148735958448236
BGLAP	63.8092572188312	-0.247610276487915	0.104340964476948	-2.37308786370879	0.0176400671036903	0.0394723114088299
BGN	7044.8803503527	-0.0236868873917164	0.159658964841286	-0.14835926949209	0.882059242528166	0.917888752321869
BHLHA15	1.50788117514409	0.343141018972813	0.304871476153189	1.12552680658257	0.26036586439874	0.364987115546569
BHLHB9	315.5564640744	0.215040318274063	0.0698593540122122	3.07818933218981	0.00208262552027419	0.0063556655958953
BHLHE22	20.9557607077605	-0.520079291368745	0.354724053404546	-1.46615174916154	0.142606950258446	0.225900061080586
BHLHE23	0.0119743418866469	-0.066741874951023	2.90284728369466	-0.0229918657195344	0.981656761451033	NA
BHLHE40	2293.79587040925	-0.0156352021095429	0.153957338244187	-0.101555419753649	0.919109566307557	0.943774491291258
BHLHE41	1823.19719010912	-0.131421192698878	0.124558014242807	-1.05510025587508	0.29137947503295	0.398522205414296
BHMT	1.66934903385768	-0.202295609010822	0.450467433886094	-0.449079320264414	0.653374437758456	0.739244157826239
BHMT2	40.3612598345816	-0.333821896240428	0.270190788673829	-1.23550435556637	0.216642856454418	0.315934571073325
BICC1	51.2507007082166	0.377568697334026	0.240807727772141	1.56792599983042	0.116898403231908	0.191448946700904
BICD1	349.459331406256	0.0895908972513538	0.105630791750908	0.848151336994817	0.396353694356705	0.508194687838997
BICD2	893.470133757177	0.485259484789354	0.0802730126610088	6.04511365281124	1.49304715936248e-09	2.95065495757965e-08
BID	1008.71325640972	-0.327865365639041	0.1092887635183	-2.99999153695377	0.00269987107808848	0.0079493257151839
BIK	3.73281989321988	-0.863852616409121	0.287349620554967	-3.00627721289743	0.00264467772807803	0.00781117080156964
BIN1	2111.42345510864	0.188886895391574	0.116657905756911	1.61915211974722	0.105414537011395	0.175974661989503
BIN2	276.584016380632	-0.0601783767640619	0.13962669881843	-0.430994768717676	0.666472174229283	0.750118066341126
BIN3	397.884523383318	-0.271383111037166	0.0577135708645026	-4.70224085898804	2.57321697818137e-06	1.86750339530322e-05
BIRC2	1365.36879053926	-0.184689973315416	0.0612908801960334	-3.01333530738508	0.00258393247716984	0.00766316650221344
BIRC3	216.603623041672	-0.534776445017873	0.236315021787356	-2.26298117222138	0.0236368499355044	0.0505391878777924
BIRC5	638.19557356945	-0.0299642123262743	0.163182316795573	-0.183624138415757	0.854308325385233	0.89718132524592
BIRC6	1078.22806619322	0.438026094445004	0.0719351684584963	6.08917868452241	1.13491395994322e-09	2.34331718204579e-08
BIRC7	10.2969320564804	0.68993122899085	0.28875607273103	2.38932197153653	0.0168795023693575	0.0380736197931175
BIRC8	0	NA	NA	NA	NA	NA
BIVM	593.395692177852	0.109108868009755	0.0810779580928989	1.34572787199128	0.17839029418354	0.270846015246668
BLCAP	2058.27646584102	-0.171550784011767	0.0680915303072298	-2.51941442992583	0.011755020865448	0.0279300165469964
BLID	0.0944948257363601	0.280053041254998	1.68432041667106	0.166270644518163	0.867943966737718	NA
BLK	1.51245995193445	-0.0418754824002029	0.558248221871722	-0.07501229875807	0.9402049264698	0.957484660721107
BLM	477.283021274015	0.198580182477926	0.135693756613053	1.46344376804455	0.143345989796454	0.226830996964313
BLMH	903.731179069457	0.145665323697862	0.0565506039098699	2.57584028510151	0.0099996824236341	0.0243381091766999
BLNK	146.902501253941	-0.211029846024584	0.162485392236396	-1.29876195712143	0.194025634040759	0.289910020155285
BLOC1S1	2139.49542600603	-0.725038022467607	0.101104590844366	-7.17116815777121	7.43604970531068e-13	5.14345838078105e-11
BLOC1S2	922.00893140382	-0.451699252917331	0.0820743015400604	-5.50354062649997	3.72238701348305e-08	4.7646553772583e-07
BLOC1S3	310.775264727144	0.117907489316028	0.0631116054768825	1.86823783716319	0.0617289269600747	0.113128811010902
BLVRA	995.060730382523	-0.309530665800224	0.0798125572397234	-3.87822012607018	0.000105223487318085	0.000472258346875078
BLVRB	807.498695329716	-0.53726826065745	0.108600211008212	-4.94721194065473	7.52839935232347e-07	6.39238592786521e-06
BLZF1	387.547797982441	-0.241689593665796	0.0694744338402793	-3.4788278263834	0.000503612037398222	0.00183636635859076
BMF	316.60758160617	-0.0152784822722518	0.140872170608353	-0.108456355902462	0.913633699178765	0.940030233195887
BMI1	1455.09420166198	0.025585236988448	0.0783412130940754	0.326587194376531	0.743980130311637	0.812913218514155
BMP1	1238.57915631961	0.0529447226914729	0.127284790167237	0.415954825568003	0.677443059817761	0.758837495344915
BMP10	0	NA	NA	NA	NA	NA
BMP15	0.0239810110301369	-0.137116351464038	2.90284728369466	-0.0472351240226182	0.962325833831623	NA
BMP2	316.694100578021	0.248163266533408	0.181651242674726	1.36615231957307	0.171891159482704	0.262663829733788
BMP2K	428.833554191443	0.186253019958374	0.110931583771152	1.67899000110381	0.0931539924764874	0.159080942047018
BMP3	1.5488440484461	0.446400656316877	0.583388481873591	0.765185927022817	0.444160838488165	0.552381714632387
BMP4	84.8911684916262	0.428861208949997	0.163943688245507	2.61590558038303	0.00889911623024004	0.0220382410196415
BMP5	9.43753677013413	-0.750910656309045	0.68301024180414	-1.09941346461445	0.271587760358091	0.377364929481567
BMP6	76.0333534640611	0.127772826879038	0.190643604734814	0.670218269617649	0.502718659098592	0.607341956551732
BMP7	2167.16112555262	0.0263485854153532	0.138130733818192	0.190751071010983	0.848720624363912	0.893379672728159
BMP8A	147.938787789098	0.538443097239778	0.137148867915053	3.92597551423668	8.63789428982704e-05	0.000399752678611038
BMP8B	164.656342892207	1.02319239877738	0.216242812544986	4.7316828094091	2.22666160333972e-06	1.64588089907364e-05
BMPER	296.25437177151	0.362828693506825	0.21772415821846	1.66646042623699	0.0956217440139614	0.162508168998968
BMPR1A	536.77260041141	0.0354617439589631	0.0804686477089001	0.440690193865914	0.659437296708332	0.744324379840748
BMPR1B	615.359585660142	-0.125629534959147	0.141455014536834	-0.888123587350334	0.374474276043534	0.486134939940733
BMPR2	1767.76654823591	0.141328443110631	0.0555146392421349	2.54578693187949	0.0109031716084416	0.0261792574374117
BMS1	559.278149582514	0.32895818040502	0.0758738873592985	4.33559149074897	1.453686947204e-05	8.44415570365529e-05
BMS1P4	12.5642411007544	0.686461368033492	0.153430013348618	4.47410094707962	7.67334863315544e-06	4.84882297324903e-05
BMS1P5	29.8232573878249	0.637251316849681	0.13271639143811	4.80160219807403	1.57401142319455e-06	1.2159373468527e-05
BMX	1.68899587440759	-0.855559907150979	0.328961686199469	-2.60078891567999	0.00930096637989662	0.0228852892839049
BNC1	1.75503266206016	0.214095812560549	0.393277340518472	0.5443888841353	0.586173893461271	0.681740367328946
BNC2	138.9962285085	-0.07128565575795	0.236249251138974	-0.30173918187794	0.762850896757445	0.827698976005182
BNIP1	346.80256797409	-0.527868900079002	0.0911068954425126	-5.79395113306304	6.87494700104804e-09	1.0970634149676e-07
BNIP2	567.90731840929	-0.106061983935812	0.0648090497627508	-1.63653045869486	0.101728616406642	0.170804540888531
BNIP3	1813.48672539552	0.198278905341059	0.132901485779594	1.49192391776483	0.135719091728388	0.21715054676542
BNIP3L	4252.93486723285	-0.170090312596831	0.0768418257955277	-2.21351211837981	0.0268623586952064	0.0562979441527319
BNIPL	6.62577027313382	-0.0446918629572224	0.160983464992475	-0.27761772278483	0.781305825929786	0.842068980658856
BOC	955.851725681488	0.023849658287474	0.132555244502878	0.179922404254297	0.857213486169853	0.899630197181592
BOD1	1391.85658240954	-0.394479172955743	0.0797041749730621	-4.94929121453257	7.4484230454323e-07	6.33344870208296e-06
BOD1L	778.718047412623	0.433543031226922	0.0798281208623289	5.43095624128004	5.60528791336497e-08	6.79282330417491e-07
BOK	397.055111496726	0.250039583510614	0.195013691519806	1.28216424991483	0.199785034248658	0.296870135598402
BOLA1	298.512990321813	-0.535077158530594	0.091550396997925	-5.84461865897448	5.07730019705455e-09	8.42344711658939e-08
BOLA2	1094.69995572888	-0.413292038019824	0.0854103298776401	-4.83889991540732	1.30559768535145e-06	1.03893224660887e-05
BOLA3	326.528938986144	-0.683148797066582	0.0810823452747771	-8.4253704644517	3.5961062343511e-17	1.87528104476491e-14
BOLL	0.0670889363539313	0.176184126503964	2.05785987890672	0.0856152201176909	0.931772298981988	NA
BOP1	351.56086485538	0.471181932813301	0.134388654530215	3.50611392353336	0.000454700556174304	0.00168050448052583
BPESC1	0	NA	NA	NA	NA	NA
BPGM	977.337402196043	-0.122787057637025	0.0695803700669381	-1.76467957153578	0.0776176337865349	0.136792625136002
BPHL	434.221300451608	-0.297095863615337	0.0776438976379332	-3.82639038808621	0.000130036011974172	0.000567751308410661
BPI	1.69422701455071	-0.0533960844500377	0.488254129165278	-0.109361255257224	0.912915963204911	0.939453003105809
BPIL1	12.7340918642783	0.40494018979991	0.437486549075975	0.925606034414529	0.354650756227942	0.46643551265199
BPIL2	0.576639072408462	0.909166313711353	0.647953491178716	1.40313514177917	0.160576543686975	0.248798876683601
BPIL3	0.0418674535992027	0.17702602121275	2.90284728369466	0.0609835805717744	0.951372285520575	NA
BPNT1	671.788726397519	-0.264939203904655	0.0719442943058281	-3.68256032616603	0.000230903203421143	0.00093399982238548
BPTF	1278.567600394	0.525480884576843	0.078411441085331	6.7015843262591	2.06171821474943e-11	8.04293717441515e-10
BPY2	0	NA	NA	NA	NA	NA
BRAF	107.020122576839	0.421130937697064	0.0824943552271798	5.10496671605371	3.30852743302377e-07	3.11521242698951e-06
BRAP	602.092591554652	0.110241591406466	0.0421218590595365	2.61720621710089	0.00886527648926388	0.021972592665783
BRCA1	367.10944905912	0.337046434599204	0.100234460547581	3.36258042152289	0.000772176304471947	0.00267114355492633
BRCA2	83.8240821770752	0.691778208587816	0.133692725482398	5.17438930272161	2.28657625050227e-07	2.26816256420479e-06
BRCC3	364.194699968564	-0.00881654067139655	0.0561693484954998	-0.156963555881424	0.875273570208442	0.912781669273913
BRD1	553.451129606189	0.552844992280888	0.0815113422130086	6.78243023941591	1.18170928560912e-11	5.19605373897173e-10
BRD2	4185.19537330425	0.317131698957414	0.0452395244107199	7.01005819774416	2.38219014084771e-12	1.37753400299052e-10
BRD3	963.020714382222	0.608247218372192	0.0954268344493782	6.37396411483033	1.8420370882925e-10	4.92964211247802e-09
BRD4	1689.86674638388	0.427540852517136	0.0762163729758613	5.60956702377511	2.02833433042423e-08	2.82991191608607e-07
BRD7	893.639755130848	0.131050503677196	0.0582491418132805	2.24982720084157	0.0244599166129597	0.0519838265619791
BRD7P3	0.640542812124031	0.826648568651459	0.420384562315514	1.96641038409738	0.0492512248975647	0.0940456361395888
BRD8	1362.5570931227	0.124268714579524	0.0629756878288478	1.97328078285156	0.048463581121215	0.0927892092924445
BRD9	736.462163210639	0.160020579007726	0.0524243257440683	3.05241081762185	0.00227011176592736	0.00686261388442389
BRDT	0.055761940699703	0.246552907181838	2.90284728369466	0.0849348529516967	0.932313183239779	NA
BRE	691.775928123899	-0.0244735538702885	0.0453439828015837	-0.539731015190703	0.589382547510751	0.684542478328168
BREA2	3.56824511003685	0.509801475535102	0.188573419139048	2.70346413541556	0.00686208528541606	0.0176470222532276
BRF1	841.540771949266	0.291467309596667	0.0795676309032585	3.66313922241878	0.000249143035292082	0.00099879365731003
BRF2	446.467458485416	-0.345798651327954	0.0670565358464728	-5.15682247767266	2.51175726496314e-07	2.46434493470251e-06
BRI3	1897.95660185693	-0.388413589944896	0.0809153419218225	-4.80024653816785	1.58470423638037e-06	1.22294637676034e-05
BRI3BP	74.2195325309648	-0.0990137814953417	0.0859405869039739	-1.15211898198898	0.249272183946388	0.352319314373769
BRIP1	85.0860470113898	0.774702879622441	0.16082495848126	4.81705630107601	1.45691590118964e-06	1.14116618323146e-05
BRIX1	573.42534805842	-0.227339276169307	0.0622719480671596	-3.65074938596949	0.000261476283712724	0.00104081219262719
BRMS1	781.890242325187	-0.157593424798551	0.0530335292463051	-2.97158094206093	0.00296270766446761	0.00861599848605845
BRMS1L	370.995024161362	-0.084540677373941	0.0776119503593613	-1.08927397111525	0.276033087453309	0.381830554938875
BRP44	1115.42571902155	-0.568769869860709	0.0786931518830485	-7.22769207041038	4.91271067849294e-13	3.68125786841738e-11
BRP44L	1337.82007404661	-0.670844214670552	0.105603681893354	-6.35246993895553	2.11884842501029e-10	5.54463256005184e-09
BRPF1	514.608599958222	0.430469606702931	0.0671783559937843	6.40786158480508	1.47574789169742e-10	4.14038222843782e-09
BRPF3	740.004115985505	0.47091556576087	0.0704657241653363	6.68290252230919	2.34255405309712e-11	8.90665794733585e-10
BRS3	0.478187034367143	1.27876902021157	0.807692819260512	1.58323683177269	0.113367494474545	0.186771804748096
BRSK1	860.651719762771	0.367600693869439	0.116631073468702	3.15182466333113	0.00162253671855132	0.00511745007829306
BRSK2	391.650611279196	0.941272779729919	0.191058100891948	4.9266310893682	8.36594924563911e-07	7.01740817320773e-06
BRWD1	1078.49061036173	0.118961006417673	0.0652425525506908	1.82336530020411	0.0682480821674345	0.122958676587772
BRWD3	101.917064554551	0.938950791695403	0.139432788212496	6.73407455830573	1.64976570443548e-11	6.75840237552795e-10
BSCL2	2107.20046556342	-0.318239194467991	0.107886881550557	-2.94974875438272	0.00318032438457199	0.00915265702226639
BSDC1	2070.69525480781	0.139045692714004	0.0482011885645725	2.88469427528186	0.00391793935980815	0.0109325401779348
BSG	13886.3290565212	-0.228093033082254	0.0708606863207706	-3.21889393012266	0.00128686077376595	0.00417125406120931
BSN	485.723624274684	0.633091281558249	0.193417576595425	3.27318381660058	0.00106343294788996	0.00353311992145817
BSND	0.178916625125376	0.486941984583484	1.0609112872619	0.458984639366248	0.646245196748874	NA
BSPH1	0	NA	NA	NA	NA	NA
BSPRY	11.4253614134912	-0.385662240904462	0.244901874635287	-1.5747623062453	0.115311320021838	0.189377207163027
BST1	106.653490394955	-0.504025394251302	0.140259356937994	-3.59352420583335	0.000326235326309142	0.00125685863503505
BST2	2214.41014465072	-0.353750592344137	0.184877682528452	-1.91343047741685	0.0556929658096939	0.104017608186105
BSX	0.00591842258646188	0.0383960445465356	2.90284728369466	0.0132270287735103	0.989446665682404	NA
BTAF1	455.596055760998	0.548386179261172	0.0924704746473589	5.93039217493445	3.02211987181006e-09	5.37584607068567e-08
BTBD1	2183.76035426201	-0.116196526196201	0.0547308138327751	-2.12305496774136	0.0337492459843196	0.0680738492353078
BTBD10	780.351348011305	-0.225077257517969	0.0496998728303791	-4.5287290429522	5.93395346897796e-06	3.88482778253002e-05
BTBD11	260.685427877331	-0.387465548384165	0.2526231362917	-1.53376905247809	0.125086479027357	0.202607875243447
BTBD12	294.119838884994	0.584149776425697	0.0945126641754162	6.18065083152784	6.38378706010787e-10	1.42439238820074e-08
BTBD16	2.39744174883286	-0.255303533199031	0.297360684651691	-0.85856519162268	0.390580449143916	0.502662000672978
BTBD17	286.040688150669	0.0683153270164556	0.251308193334209	0.271838837047404	0.785745941618467	0.845467869598778
BTBD18	2.83358377791167	0.0953902935117418	0.18517593349424	0.515133320576503	0.606459860009202	0.698557235791038
BTBD19	27.5025338907637	0.227423103261212	0.159453740168716	1.42626383690077	0.153792199019545	0.240357947959285
BTBD2	2977.65574149836	0.0709785893291177	0.0767438060260041	0.924877107411993	0.355029835845296	0.466831656638284
BTBD3	1606.61555841215	-0.0644364687177836	0.0942527319188222	-0.683656244290949	0.494192259581072	0.599538154095116
BTBD6	1132.69597160295	-0.166716482763109	0.0877477515514768	-1.89995162058717	0.0574394688329909	0.106569810073021
BTBD7	558.040275998245	0.261622890815596	0.0747126610277947	3.50172095621473	0.000462263490152126	0.00170495213431006
BTBD8	2.16678433119627	1.14854982272701	0.306699447921766	3.7448708516097	0.000180486595109509	0.000754502772303444
BTBD9	450.61597004319	0.443783578387619	0.081567350613094	5.44070115128121	5.30712779927333e-08	6.45323775132735e-07
BTC	7.9478646731298	0.336069034937943	0.47920102791456	0.701311172892273	0.483108842553063	0.589472109673267
BTD	368.040767887892	-0.361727245469793	0.0771480015020087	-4.68874421148	2.74886729766846e-06	1.97980094037924e-05
BTF3	5510.42570445761	-0.373751397253121	0.0674686745861055	-5.53962856904991	3.03113844475771e-08	3.99355265864635e-07
BTF3L1	0	NA	NA	NA	NA	NA
BTF3L4	1480.06881773178	-0.344535974296774	0.0796810999189925	-4.32393597285988	1.53269796312704e-05	8.84313127009197e-05
BTG1	2924.81051097473	-0.215126928054416	0.0722113219297106	-2.97913017385027	0.00289067944108068	0.00844065255210178
BTG2	3255.6395300707	-0.183183031856405	0.15302994607492	-1.19704042610538	0.231290798206332	0.332231127391587
BTG3	1113.12768405616	-0.217250859468691	0.0923903045039189	-2.35144651416833	0.0187005779315627	0.0414840500211205
BTG4	0.26776229802821	-0.460580230952082	0.910623028643166	-0.505785837239752	0.613007001951466	NA
BTK	273.096396990005	-0.385896990536758	0.138477269801621	-2.78671720701588	0.00532449216570803	0.0142599653176609
BTLA	3.34796954170005	-0.360155135970883	0.231898190769481	-1.55307436757407	0.120405368967088	0.196334223910065
BTN1A1	3.16401240589756	-0.384915418656168	0.496820443427736	-0.77475760860504	0.438482902777432	0.547464351815421
BTN2A1	560.472741676011	0.157640351813973	0.0523614455364576	3.01061879019771	0.00260715944827536	0.00771424078936889
BTN2A2	344.805190878945	0.118796402842439	0.0694375881417958	1.71083711317636	0.0871111862890949	0.15046173398224
BTN2A3	21.4135887398406	0.34567801131181	0.126935635853974	2.72325426178568	0.00646422861268381	0.0167631849128343
BTN3A1	782.28171959322	-0.0302631953088463	0.102721480667549	-0.294614087649213	0.768288699211096	0.831783335992952
BTN3A2	1256.84274156084	0.0461469796317832	0.129810255702136	0.355495637707335	0.722218312395417	0.79479960019316
BTN3A3	616.160274130467	0.0395882565356554	0.116389293404731	0.340136582821167	0.733753673300797	0.804219833896458
BTNL2	0.79047652602567	0.796224302682447	0.451637806803179	1.76297088217293	0.0779054007764503	0.137236823152481
BTNL3	1.0874818263375	1.11531438526884	0.494945145776345	2.2534100895553	0.0242333039521921	0.0515936709217737
BTNL8	2.99096842261715	-0.0877669875959063	0.289012992144972	-0.303678346584092	0.761372956318092	0.826793747142357
BTNL9	81.3051295317762	0.871030323650741	0.200024240232969	4.35462383277272	1.33295613180806e-05	7.82167071295904e-05
BTRC	584.355762187593	0.415774388699734	0.0685184806637268	6.06806199834261	1.29462931983047e-09	2.61585168597946e-08
BUB1	451.518253352344	0.451042327381884	0.132539843250351	3.40306972092855	0.000666332747078206	0.00234737083711155
BUB1B	325.198774268885	0.583250413495381	0.142195455875201	4.10175142310647	4.10034640592824e-05	0.00021129120276279
BUB3	1367.71379727567	0.0572149736890008	0.0656430067297459	0.871608059096934	0.383422232629757	0.495541892318616
BUD13	432.780627467003	0.0331435607401518	0.0556381255780049	0.595698729887735	0.55137650685623	0.65116595083415
BUD31	2143.96465765936	-0.539848719108505	0.0850384065232658	-6.34829297937052	2.17717159479762e-10	5.67120334493513e-09
BVES	267.938900129661	0.214911998829789	0.173438587407603	1.23912447651986	0.215299403820047	0.314332235614526
BYSL	447.715664496614	0.133513861993346	0.0750849432391957	1.77817091194989	0.0753757887662319	0.133598816032568
BZRAP1	460.321394056123	0.354929354428518	0.180499692107402	1.96637096875116	0.0492557743993987	0.0940456361395888
BZW1	5089.16284192979	-0.33365397390365	0.0569707533359823	-5.85658349883388	4.7248608541756e-09	7.91909576901156e-08
BZW2	1377.17552105459	-0.165759271148924	0.118241247760613	-1.40187349413391	0.16095302685177	0.249231895548668
C10orf10	2418.32162119682	-0.277658433241838	0.176692594289662	-1.57142088698214	0.116084917490901	0.190352400511234
C10orf105	162.547791930858	-0.417714018114366	0.284964256250025	-1.46584706310628	0.142689956303892	0.225991737047045
C10orf107	81.8561858861254	-0.653841469784788	0.186382505967204	-3.50806244605295	0.000451383083172471	0.00166995954901743
C10orf108	4.14443271503925	0.790203000367347	0.234054150252318	3.37615461855934	0.000735065974100599	0.00255546616629135
C10orf11	48.1399782426285	-0.881560726702136	0.150033644194055	-5.87575361138276	4.20924000711323e-09	7.14619660418221e-08
C10orf110	32.6384398032594	-0.457191590795373	0.206565242990249	-2.21330357506928	0.0268767233153731	0.0563149239314539
C10orf111	7.35068887886874	-0.177597444307913	0.144927341806333	-1.22542400967539	0.220415505230979	0.32024325572259
C10orf113	0	NA	NA	NA	NA	NA
C10orf114	78.6795279519104	-0.0283175205295117	0.10908920923324	-0.259581316324029	0.795186749827507	0.852446263048276
C10orf116	234.433182409267	-0.491042823390266	0.222484703796933	-2.2070857681904	0.027308067866812	0.0570591718969149
C10orf118	110.831756638081	0.406469154236366	0.0941876357027726	4.31552561229011	1.5922358847183e-05	9.13972874266645e-05
C10orf119	1037.48053491799	-0.0086728225269906	0.060775376371753	-0.14270290115425	0.886524825380932	0.921629138080275
C10orf12	30.0128206690692	0.705614483203596	0.11733860919547	6.01348940507843	1.81571803052501e-09	3.47012466110115e-08
C10orf120	0.0122222481508168	0.00320880629002841	2.90284728369466	0.00110539962196851	0.999118018887731	NA
C10orf122	0.0487408655256934	-0.0680101825180504	2.36098521849695	-0.0288058485013926	0.977019436387358	NA
C10orf125	89.98853784505	-0.790669399156204	0.137222191901689	-5.76196450587723	8.31404853278902e-09	1.296789668809e-07
C10orf128	13.7448771610749	-0.484879137812721	0.220094901203344	-2.20304575508882	0.0275915238875148	0.0575644971685692
C10orf129	0.00626814214524889	-0.0315546366945157	2.90284728369466	-0.0108702365679926	0.991326976874149	NA
C10orf131	0.508202509874051	0.484100529423848	0.418877463327908	1.15570917942864	0.247800132204128	0.350762501185284
C10orf137	227.487358228951	0.327922150201604	0.0706176048122279	4.64363172715286	3.42337551832496e-06	2.40492130162328e-05
C10orf140	54.7254302436801	0.370036392143698	0.130805670624783	2.82890176225732	0.00467080339381828	0.0127233759821914
C10orf18	749.803745319057	0.432980644631562	0.0725124221651093	5.97112372892019	2.35624957077089e-09	4.35506601035392e-08
C10orf2	248.688098498713	0.329083530507741	0.0754507062526436	4.36156991567207	1.29132517725063e-05	7.62165802024136e-05
C10orf25	93.9314202298883	0.157026835132328	0.106612289394125	1.47287743303054	0.140784088106377	0.223603377241463
C10orf26	1332.66548602916	0.0205988947931211	0.0693233158655875	0.297142376066671	0.766357813144845	0.830301759840767
C10orf27	0.0179945890496792	0.0379722492745726	2.90284728369466	0.0130810358119296	0.989563141135105	NA
C10orf28	176.180303394573	0.236796089680613	0.0635611175503352	3.72548656799639	0.000194938833448248	0.000807783405698914
C10orf32	523.460046516442	-0.383659675743162	0.0852350217090592	-4.50119760692669	6.75716475732629e-06	4.35871058090947e-05
C10orf35	156.333100051701	-0.118076280271641	0.153761528914492	-0.767918224442887	0.442535769485955	0.550898237519262
C10orf4	226.319803274206	0.144331273406984	0.0866226959445137	1.66620620419659	0.0956723506823215	0.162563449987799
C10orf40	0	NA	NA	NA	NA	NA
C10orf41	66.0348918388841	-0.589583893683237	0.122564121738318	-4.81041176913121	1.50619680030762e-06	1.17465061824511e-05
C10orf46	746.238144522571	0.179745713609966	0.0635954607507666	2.826392190386	0.00470755875950686	0.0128137939656382
C10orf47	19.43488429819	0.028939342586301	0.145812074537505	0.198470138211067	0.842677246269636	0.888863741108771
C10orf50	0.451896235073415	-0.421591584711385	0.458045398064283	-0.920414409779134	0.357356241315266	0.469067560310469
C10orf53	0.0786189261061796	0.105809358615316	2.0281688148856	0.0521698972189767	0.958393318797216	NA
C10orf54	1637.64156662069	-0.153436812360847	0.12870356611675	-1.19217219064203	0.233193735233983	0.334403646794351
C10orf55	13.2773320406735	-0.14013830968683	0.196813141676488	-0.712037359360803	0.476441641941225	0.583495045980897
C10orf57	411.11384308113	-0.136392674384013	0.0615376282317553	-2.21641097167977	0.0266633689650763	0.0559461005096175
C10orf58	1612.44298467405	0.160216365706164	0.0887140819269244	1.80598572657425	0.0709205691243713	0.126997462424843
C10orf62	0.97916167827601	0.19964680450972	0.361277803325993	0.552612982784254	0.580528450049776	0.676443154444419
C10orf67	2.47668381371046	-0.370987120471733	0.358240610414332	-1.03558086293639	0.300397723733704	0.40818682762576
C10orf68	2.44957969828523	0.322175048731277	0.235589201729961	1.36752892902351	0.171459576025005	0.262182553799311
C10orf71	0.0116759432858198	-0.0667418749510232	2.90284728369466	-0.0229918657195345	0.981656761451033	NA
C10orf72	395.445612193348	0.17812776298945	0.0990537904403887	1.79829325256007	0.0721305484454683	0.128715596670302
C10orf75	156.272054714793	-0.123603726958713	0.108469363083525	-1.13952662249463	0.254483570785767	0.358389392091717
C10orf76	528.945869147346	0.0436736533316977	0.0492715183412494	0.886387405990181	0.375408803327078	0.486864636838117
C10orf78	115.807883196427	-0.240441178657039	0.0973616486011081	-2.46956765946035	0.0135276434182673	0.0314764056455065
C10orf79	48.177727159661	-0.328927641399426	0.252966504643348	-1.30028140232705	0.193504539770444	0.289395895487041
C10orf81	35.901579804462	0.13764809289214	0.302744320345391	0.454667796030334	0.649348252531249	0.735707111038996
C10orf82	1.56196627245138	0.425808022387599	0.382077432717147	1.11445478305134	0.265084132386953	0.370129894165136
C10orf84	537.402991280345	-0.441937785860447	0.0847799020285313	-5.21276594200026	1.86045574245278e-07	1.89351647268086e-06
C10orf88	145.426915353527	0.0668842283840295	0.0612473880860747	1.09203397033083	0.27481817008956	0.380530487441534
C10orf90	93.9475975142043	0.320852529499664	0.182578760779026	1.75733764502866	0.0788602748225116	0.138701533731838
C10orf91	0.0351249827301839	0.00236121574610255	2.90284728369466	0.000813413698807216	0.999350989839745	NA
C10orf93	19.6437953971773	-0.410092663073808	0.152691249053734	-2.68576402128645	0.00723641770512328	0.018483132510856
C10orf95	2.94387504726499	0.0184974063678639	0.186259653846486	0.0993097860211282	0.920892308707936	0.944795897073622
C10orf96	0	NA	NA	NA	NA	NA
C10orf99	0.012116309865711	0.00320880629002833	2.90284728369466	0.00110539962196849	0.999118018887731	NA
C11orf1	249.96581863221	-0.562497418842936	0.0962932606593603	-5.84150349662355	5.17317927332163e-09	8.54043628973287e-08
C11orf10	1480.9368646036	-0.508098254512556	0.0792067252284017	-6.41483728872007	1.40973346315536e-10	3.98321740527391e-09
C11orf16	0.335564721509766	-0.288033287156833	0.534553695061255	-0.538829475538145	0.59000452323198	0.685087896810688
C11orf17	541.602612833727	-0.383430550004385	0.0680627225866273	-5.63348828011355	1.76600524432834e-08	2.50274533601268e-07
C11orf2	1923.36555255484	0.104274172511916	0.0629995007295051	1.65515871244167	0.0978923078115621	0.165662488348841
C11orf20	5.94719810211881	-0.27676317186883	0.25400251827945	-1.08960798398203	0.275885864615566	0.381656260711257
C11orf21	9.73021457906652	-0.0601607250650677	0.203550949221472	-0.295556101777793	0.767569102249298	0.831363691571391
C11orf24	752.792094437098	0.0627169367840551	0.0679621825591898	0.922821110540902	0.356100437579932	0.467897294471944
C11orf30	351.873964379661	0.457480103343931	0.0660162560102772	6.92980988307959	4.21406563018786e-12	2.11692056685191e-10
C11orf31	1351.13924583062	-0.673496224185639	0.0923516618136026	-7.2927353006921	3.03724464139519e-13	2.52878739031718e-11
C11orf34	0.140612074606715	0.453450088327707	1.05567416134748	0.429536030084241	0.667533179185345	NA
C11orf35	9.57555024745036	0.360647038973112	0.267197841991329	1.34973784326003	0.177100088896493	0.269296355687371
C11orf36	0.0239628340632234	0.0727356922591164	2.90284728369466	0.0250566720018907	0.98000976005456	NA
C11orf40	0	NA	NA	NA	NA	NA
C11orf41	544.656824045137	0.538654903689495	0.132108390773221	4.07737086597442	4.55478114716756e-05	0.000231197245697605
C11orf42	0.44323354425764	0.870475370236368	0.452218190854966	1.92490127075747	0.0542417109147764	0.101824940406194
C11orf45	43.2979474800829	-0.290708786081546	0.129613581434934	-2.24288830586385	0.0249040180518244	0.0527904126171628
C11orf46	637.245246451147	-0.333595304392423	0.0596423483680822	-5.59326239694056	2.22842115036231e-08	3.08039400216109e-07
C11orf48	616.410294121321	-0.401262103123897	0.0751939899337042	-5.33635871002024	9.48317043575041e-08	1.07059219784391e-06
C11orf49	1258.02850422374	-0.16206709382768	0.0679680242363521	-2.38446086448104	0.0171041671509607	0.0384838411163364
C11orf51	547.369681802044	-0.441976041093191	0.0911609827414117	-4.84830272559594	1.24522277241925e-06	9.96621554926029e-06
C11orf52	11.3654678436461	0.0773438515644275	0.220326419748842	0.351042111302832	0.725556755987666	0.797385278641052
C11orf53	0.0362405626794219	0.0723128926894349	2.76480457483106	0.0261547934880184	0.979133873105152	NA
C11orf54	543.965901029941	-0.284410490114928	0.0767536758851266	-3.70549666625206	0.000210976904984482	0.000864616221721377
C11orf57	1088.86634227762	-0.0945358617693082	0.0525222345018501	-1.79992078908939	0.0718731465453964	0.12837090748559
C11orf58	3774.02876882694	-0.363048835008961	0.063190882680981	-5.74527241282279	9.17731171880028e-09	1.41426541517484e-07
C11orf59	2850.08070263884	-0.529843072252766	0.0773294788662433	-6.85176054489175	7.29465899265788e-12	3.40745837205089e-10
C11orf61	269.768598146644	0.111065763027377	0.0857386219474684	1.29539944198574	0.195182470448236	0.291396442681478
C11orf63	91.9921543946004	-0.169985696920919	0.190479840578755	-0.892407807589681	0.372174387773099	0.483720651874926
C11orf64	0	NA	NA	NA	NA	NA
C11orf65	5.09989552934062	-0.251837070485388	0.189044754845145	-1.33215582041236	0.182808990693296	0.276076290725331
C11orf66	42.2934545048245	-0.387841290061962	0.17073325466978	-2.27162125393847	0.0231093960445918	0.0496238063839927
C11orf67	220.09673994507	-0.297533673975069	0.0701956731027973	-4.23863267952925	2.24885260874387e-05	0.000123907369226868
C11orf68	1113.99069398711	-0.106106106213937	0.0521210873055735	-2.03576156406451	0.041774303730629	0.0817182054456822
C11orf70	71.0236381008387	-0.755378944588424	0.2660978785626	-2.83872591795473	0.00452940435181118	0.0124058495070016
C11orf71	321.6007760385	-0.0973972175192425	0.115354412511666	-0.844330228888229	0.398484898624959	0.510314919666116
C11orf73	679.004163274061	-0.424403728322904	0.0766537511930425	-5.53663352044048	3.08340795424187e-08	4.04759187219604e-07
C11orf74	192.784049096724	-0.286828076022579	0.0769185330496459	-3.72898526077519	0.000192252395514067	0.000798491242707849
C11orf75	144.091740113995	-0.32240388281237	0.117323270507058	-2.74799604050395	0.00599607331784756	0.0157489970130233
C11orf80	124.909819164077	-0.0618679171791639	0.0902096351708042	-0.685823826490622	0.492824209485606	0.598241686357688
C11orf82	175.118490117261	0.274392514919265	0.123911651445253	2.2144206111279	0.0267998583453196	0.0562062568492393
C11orf83	390.948389821059	-0.495720599635304	0.0956274912155275	-5.18387122086092	2.1732702043996e-07	2.17496334757498e-06
C11orf84	489.618205863045	0.180240620458252	0.0722816348467694	2.49358804404945	0.0126459217496197	0.0296782274233538
C11orf85	0.0415396573057498	-0.102775598547323	2.71447394176797	-0.0378620685820191	0.969797656236396	NA
C11orf86	1.67021830301641	-1.18307004349308	0.554352232333234	-2.13414860532555	0.0328306182136826	0.066556852435449
C11orf87	99.990104949086	0.0923029195274816	0.266726894328081	0.346057789785333	0.729299284640282	0.800617649552608
C11orf88	24.5822719166769	-1.83349639154108	0.444091629792109	-4.12864433495266	3.64908346030929e-05	0.000190493808273446
C11orf9	1128.27517211981	1.04529719399581	0.252744733776255	4.13578229060619	3.53747451300357e-05	0.000185445852339465
C11orf90	1.2250332974173	0.476620285016066	0.386467267640274	1.23327465201971	0.217473311625363	0.316822075584729
C11orf92	45.8041018967584	0.450617518568694	0.204838255820768	2.19986992548394	0.0278161250285487	0.0579524087712488
C11orf93	62.3959158482699	0.0694411301946058	0.181119117720394	0.383400333816813	0.70142295585933	0.778473860662441
C11orf94	0.0123903112618341	0.0731594875310794	2.90284728369466	0.0252026649634713	0.979893311299146	NA
C11orf95	706.860628259749	0.427280253842372	0.110698676220866	3.85984971482281	0.000113456780037451	0.000503555462041835
C12orf10	887.193364021309	-0.374671557428907	0.0709179947347696	-5.28316626591267	1.26970058411353e-07	1.35274261283754e-06
C12orf11	479.571431881387	-0.116674286298581	0.0571720850161328	-2.04075618836812	0.0412750673078226	0.0808419527841301
C12orf12	0.0639942614900574	0.0362770681867212	2.90284728369466	0.0124970639656072	0.990029045145469	NA
C12orf23	1494.08793534686	-0.235815401564277	0.0704690737839876	-3.34636726299446	0.000818778702688303	0.00280956233336128
C12orf24	359.832880281828	-0.387466916886054	0.0896185481419843	-4.32351254198163	1.53564403738393e-05	8.85444769743912e-05
C12orf26	70.1087088061139	-0.386546720571083	0.0912067947885956	-4.23813512432975	2.25384111472554e-05	0.000124106180671231
C12orf27	0.0901355780028879	0.245289984446275	1.55733793521014	0.157505945819766	0.874846122296235	NA
C12orf29	693.311596066674	-0.619946541035491	0.0906361792828374	-6.83994565901656	7.9223226346162e-12	3.65320641694712e-10
C12orf32	789.677374049384	-0.130784971017327	0.0675135331502585	-1.9371667414628	0.0527249643219369	0.0994962791093839
C12orf34	431.551397884389	0.97004389643795	0.177710084745913	5.45857539725392	4.79970040456171e-08	5.9447528977712e-07
C12orf35	370.615411837684	0.200382132671796	0.0849183940687355	2.35970233386186	0.018289604002357	0.0407129890306212
C12orf36	0.0244833544416433	0.0727356922591163	2.90284728369466	0.0250566720018906	0.98000976005456	NA
C12orf39	10.4144112748986	-0.672210624308333	0.373207415240062	-1.80117167252944	0.0716758257590308	0.128082079734739
C12orf4	582.060336977655	-0.247171928748796	0.065200863005001	-3.79093032449337	0.000150084056611669	0.000643258263609213
C12orf40	0.0972880471921299	0.210100312458563	1.9961184051428	0.105254433763679	0.91617391865483	NA
C12orf41	949.558462006781	-0.462221346089028	0.0934445959240816	-4.94647487656276	7.5569475711905e-07	6.41057288303254e-06
C12orf42	0.729314007411814	0.644271364584262	0.526537180746431	1.22360089304791	0.221102822561354	0.320955134469561
C12orf43	352.498636611339	-0.142905721334856	0.0496505121212646	-2.87823257463747	0.0039991018695086	0.011131380284978
C12orf44	843.846241167825	-0.21387472793558	0.0666934426194808	-3.20683292892589	0.00134204912638736	0.00432887938781572
C12orf45	126.756944983201	-0.262357926015871	0.0863411050026941	-3.03862136125875	0.00237663356293435	0.0071306936929949
C12orf47	482.284889203822	-0.476091960410174	0.0868208063045613	-5.4836159749551	4.16718866859804e-08	5.23343023855218e-07
C12orf48	150.52191770497	-0.21809773124143	0.12266717216921	-1.77796330823198	0.0754098812992549	0.133619915727945
C12orf49	750.642035646905	0.111238826511357	0.0742019555546702	1.49913604944548	0.133838341179653	0.214465715742215
C12orf5	636.776424455251	-0.292085993606753	0.0686556535229961	-4.25436185687052	2.09646039048815e-05	0.000116402419458286
C12orf50	0.718592412257305	-0.66435462424428	0.599798555674472	-1.10762958323101	0.268021821787959	0.373564631716241
C12orf51	1041.93877510951	0.68142775623	0.0954146218340157	7.14175399044623	9.21474117589588e-13	6.16051692592236e-11
C12orf52	493.797926579069	-0.177821294057177	0.0607612253195426	-2.92655872428539	0.00342734793963838	0.00973638920606938
C12orf53	939.684988966346	0.102853963002218	0.159094707294023	0.646495189887953	0.517958711253289	0.620501562961574
C12orf54	0.36000208193302	-0.639138264180556	0.500636401596318	-1.27665160212604	0.201725275231612	0.299085848236471
C12orf56	0.517525823882344	-0.0185029477655476	0.793734991888532	-0.0233112411001607	0.981402005049968	0.986779249626446
C12orf57	2416.20909102594	-0.792457627418377	0.130331762933278	-6.08031081282979	1.19949804464515e-09	2.45133782214755e-08
C12orf59	69.0056386786404	-0.308960269643996	0.157826171842197	-1.95759845175052	0.0502771491849514	0.0957112576418085
C12orf60	37.4339926962462	-0.901785683505248	0.129889393787228	-6.94271993433476	3.84621474867375e-12	1.97066455954839e-10
C12orf61	13.6068373020773	-0.434914650632499	0.144697412363002	-3.00568367830538	0.00264984500086936	0.0078225233906163
C12orf62	742.587184414998	-0.830958810134917	0.104995467793451	-7.91423503888373	2.48777927355085e-15	4.91650796214709e-13
C12orf63	13.230825069335	-0.678748049040411	0.33839298398288	-2.00579823213696	0.0448777793657747	0.0868670739548048
C12orf65	391.656647376723	-0.0228348643801499	0.0643235239038508	-0.355000208233038	0.722589435232948	0.795095962018437
C12orf66	109.829675136044	-0.230855980453847	0.0733319079965426	-3.14809728480993	0.00164336990462291	0.00517589568559343
C12orf68	316.43241459864	-0.323921220682288	0.161200532593271	-2.00943021385408	0.04449152868732	0.0862772969498343
C12orf69	1.37794243778867	-0.484946121338856	0.25310146044522	-1.91601471001316	0.0553632233387544	0.103533060440026
C12orf70	2.16235282341801	-0.283015983556661	0.313597878672884	-0.902480542133629	0.366801653123724	0.478115599751906
C12orf71	0.502546355350326	0.2100921687969	0.489239623704225	0.429425906279239	0.66761330410631	0.750960574246177
C12orf72	56.0661181237206	-0.242295486187351	0.0756604479098706	-3.20240618289733	0.00136284683939817	0.00438844002860103
C12orf73	177.90418801837	-0.436251177995186	0.0786690310955509	-5.54539914779576	2.93284345383756e-08	3.87825416719226e-07
C12orf74	0.0981989385716701	0.0702007442527881	1.34451563987536	0.0522126646732764	0.958359241749092	NA
C12orf75	216.660797593753	-0.37131094211768	0.111213327563037	-3.33872702358643	0.000841632262700862	0.00287645659680964
C12orf76	676.924478703561	-0.158789192962497	0.0979951377141722	-1.62037828270261	0.105151042083322	0.175583689956033
C12orf77	0	NA	NA	NA	NA	NA
C13orf1	315.021498120853	-0.230104194089597	0.0711103937219625	-3.23587287379242	0.00121271380538436	0.00397040689532721
C13orf15	1511.88754436665	-0.0213010122605038	0.125018617499016	-0.170382721282864	0.864709159877094	0.905143098305809
C13orf16	5.59033842714131	-0.0429951241904447	0.243902784997349	-0.176279759129901	0.860074162896762	0.901846757946205
C13orf18	412.660446983717	-0.2968683326758	0.144436904915726	-2.05534958568251	0.0398452511607681	0.0784172682069658
C13orf23	760.295631107381	0.40963449809908	0.081302585483084	5.03839448235394	4.69453108458934e-07	4.21710524601672e-06
C13orf26	39.2371411852002	-1.32772719470391	0.245956041049504	-5.39822965534186	6.73016842352262e-08	7.98913194248388e-07
C13orf27	239.700906444775	-0.232595458276639	0.118755899319977	-1.95860129567064	0.0501594977430182	0.0955075074018465
C13orf28	0	NA	NA	NA	NA	NA
C13orf29	69.6068017761768	0.349918787557154	0.17625213869832	1.98533073210583	0.0471076869970327	0.0906079832037043
C13orf30	3.33234672274777	-1.34224826167074	0.708753240908296	-1.89381604795288	0.0582494307852631	0.107840000333763
C13orf31	124.684109748652	-0.0237997159557678	0.167267457265026	-0.142285393374866	0.886854583537403	0.921685319205678
C13orf33	75.8837112115702	-0.766369709322288	0.320774195189412	-2.38912518779685	0.0168885465303541	0.0380892426388122
C13orf34	146.948943745398	0.166450536373649	0.0956932505208952	1.73941772766203	0.0819613122095924	0.143370512477124
C13orf35	0.0973833979531624	-0.349506681481061	1.26106818694601	-0.277151295305829	0.781663935895702	NA
C13orf36	22.477498673472	0.290815881590914	0.353604603582703	0.822432396649771	0.410830847526023	0.522073343831825
C13orf37	473.997096679581	-0.295263051476655	0.102122460732316	-2.89126455981707	0.00383694968207483	0.0107281876682888
C13orf38	29.9595142721128	-0.245462797129489	0.175782088972411	-1.39640391443985	0.162592896997361	0.251100958316921
C13orf39	1.52036362211593	0.785180335890133	0.775249962712693	1.01280925334416	0.311151279979155	0.419981537164327
C14orf1	834.16072201387	-0.0778783201601396	0.0789557723303768	-0.986353725149711	0.323959564471709	0.433940772192702
C14orf101	258.709792002668	0.0713732152767734	0.0873592768718887	0.817007853458326	0.413923940011999	0.525034298255567
C14orf102	214.424810020651	0.219013875393536	0.0775909130066023	2.82267429144569	0.00476249276905716	0.0129515605562867
C14orf104	324.135494130965	-0.199670346540351	0.0855729903873368	-2.33333374977974	0.0196306354172781	0.0432008501400305
C14orf105	0.65643993221442	0.279713293454295	0.593317033544532	0.471439850265651	0.63732666395957	0.725193465653205
C14orf106	260.859273890958	0.294477099995414	0.0968540063901931	3.04042249743456	0.00236246485402704	0.00709528522625624
C14orf109	412.473057862121	-0.3279261119954	0.0683420985029083	-4.79830323005731	1.6001540153658e-06	1.23295500481313e-05
C14orf115	0.118736754092705	0.209255744040929	1.25498492523029	0.166739647492204	0.867574908016938	NA
C14orf118	215.199136627968	0.072986353015003	0.0740516503562617	0.985614131000003	0.324322501042512	0.434362217660748
C14orf119	1058.06627661754	-0.526725945788368	0.0847967651419335	-6.21162782456065	5.24385087425491e-10	1.2044114191903e-08
C14orf126	429.49451416274	-0.370434296956621	0.0826879112115457	-4.4799087500096	7.4674956769765e-06	4.73705263685169e-05
C14orf128	111.27099772918	0.279778863706416	0.138822949186826	2.01536464500472	0.0438664560445482	0.0852213833320897
C14orf129	488.316451218762	-0.565251867196383	0.0944786737464976	-5.98285141801472	2.19264769639574e-09	4.1032857619127e-08
C14orf132	2034.84877185717	0.586146691157314	0.14043391482022	4.17382575930954	2.99526866796038e-05	0.00015988991310359
C14orf135	1058.98455137288	0.0930320890763743	0.0679237363235237	1.36965505892165	0.170794603685123	0.261278558450337
C14orf138	102.268579429169	0.0497236008671043	0.0914562646178057	0.543687204751894	0.586656738859975	0.682213694901893
C14orf139	106.814805238428	0.367282778955412	0.141182099862689	2.60148261934497	0.00928217684620903	0.0228484353137453
C14orf142	324.589732880916	-0.801452373830616	0.0886577738768455	-9.03984319461836	1.56896717082466e-19	3.13514506667896e-16
C14orf143	69.536182851834	-0.454291485485377	0.0726757436094448	-6.2509368727854	4.07997774639393e-10	9.75722337648252e-09
C14orf145	62.9480582572995	0.52385953372787	0.103250669087126	5.07366720583498	3.90221272612909e-07	3.5988407008567e-06
C14orf147	1596.52756121645	-0.43185561461124	0.0854154009807479	-5.05594552800352	4.28263570075112e-07	3.90136996564609e-06
C14orf148	12.2439433965697	0.00706800919858558	0.134226577557881	0.0526573002692983	0.958004961243938	0.970798513721248
C14orf149	244.01896460773	-0.32198468313334	0.105085061877252	-3.06403857390735	0.00218370751637255	0.00662927008346453
C14orf153	573.467762665589	-0.449190971278434	0.0846974880466448	-5.30347453788776	1.13619058080713e-07	1.23389199306977e-06
C14orf156	532.985661388092	-0.411402204251112	0.0809043726624595	-5.08504288102598	3.67543020433894e-07	3.41950009285212e-06
C14orf159	979.8261001	-0.0441347474343669	0.0848653690025311	-0.520056036438733	0.6030245191043	0.695714200126491
C14orf162	9.27943210487196	0.232989599500492	0.281627225292372	0.827297855378198	0.408068259041826	0.519463786252268
C14orf165	0	NA	NA	NA	NA	NA
C14orf166	1760.56905506066	-0.307928141284708	0.0729419513934472	-4.22155063584398	2.42627434971753e-05	0.000132505672351412
C14orf166B	0.766501472529806	-1.00871691770204	0.446830336260967	-2.25749425641707	0.0239772079784885	0.051114996240533
C14orf167	457.036659220735	-0.2038076332219	0.0866563910724029	-2.35190538977807	0.0186775248842274	0.0414390896308663
C14orf169	140.428697065774	-0.0904640513708764	0.113335755474935	-0.798195159080962	0.42475724622335	0.53515598772218
C14orf174	33.4588568959128	-0.24390634494706	0.142153333072295	-1.71579758051129	0.0861990971712534	0.149201594179771
C14orf176	22.0491635307438	-0.17757911388495	0.139515201476401	-1.27282985657292	0.20307842404855	0.30066373409806
C14orf177	0	NA	NA	NA	NA	NA
C14orf178	1.64197591380457	-0.202931346669365	0.247844089356773	-0.818786307133771	0.412908344601497	0.524194809354322
C14orf179	412.98379667647	-0.646349766126182	0.0835707302074436	-7.73416439609633	1.0408446396001e-14	1.61366810332485e-12
C14orf180	1.59371205568957	-0.643953581824259	0.530365549375605	-1.21416932638702	0.224683071059222	0.324867370150269
C14orf181	24.3330907174344	-0.068727935689948	0.149047758380334	-0.461113514465416	0.64471716626663	0.731793651404067
C14orf182	0.62236737578844	0.70209267435897	0.424146356227093	1.65530757025545	0.0978621241173083	0.165642582600063
C14orf183	0.0305780341103603	0.107499135243662	2.90284728369466	0.0370323081918521	0.970459245188831	NA
C14orf184	0.251469953807459	0.414447749536291	0.809225215649015	0.512153775638215	0.608543391135864	NA
C14orf19	10.3617825238217	-0.253432505501768	0.102470382424755	-2.47322689254006	0.0133899102689504	0.0312246040296686
C14orf2	1364.86998836897	-0.605474478198168	0.0873846254601523	-6.92884446216762	4.24291975513877e-12	2.12547824168289e-10
C14orf21	200.490268199913	0.513508781359545	0.100031610478598	5.13346510070848	2.84455796538798e-07	2.72833571406661e-06
C14orf23	92.716013027666	-0.361422112275297	0.220815127243415	-1.63676337208947	0.101679921775729	0.170748234510181
C14orf28	63.8356577804689	-0.117253621964467	0.0793769995975216	-1.4771737727427	0.139629062264695	0.222102339975966
C14orf33	50.864237082125	-0.203855010931327	0.0942468139260129	-2.16299100669186	0.0305418713283938	0.0627014856129948
C14orf34	0.920626815949992	0.0656931380838811	0.423875431922958	0.154982179046936	0.876835366603531	0.913880453955254
C14orf37	265.240967574117	0.171252502881111	0.102588895523241	1.66930837892017	0.0950562805315662	0.161669391817636
C14orf39	1.86746423298776	0.721853340205352	0.77271131436501	0.93418243888217	0.350209792747622	0.461878330358847
C14orf4	1583.48693296849	0.129968505627996	0.0893513720409111	1.45457761486289	0.145786231904478	0.229782611268197
C14orf43	795.994456077512	0.367980203438901	0.0974963473939063	3.77429732779815	0.000160459295836616	0.000681727077971828
C14orf45	151.503887372639	-0.483835453877143	0.100882695062468	-4.79602030434995	1.61848882283069e-06	1.24548151432551e-05
C14orf48	0.0827176700894218	0.490326689915561	2.23967666652815	0.218927444859996	0.826706567108525	NA
C14orf49	32.9339113394984	0.710069639447757	0.153847931887444	4.61539931500183	3.92340215773809e-06	2.70338944079547e-05
C14orf50	27.7388692308264	-0.302919417652551	0.23665500051993	-1.28000429734017	0.200543624560588	0.297744286642254
C14orf53	0.0297750154745195	0.0375484540026092	2.90284728369466	0.0129350428503488	0.989679616810245	NA
C14orf64	56.7623834880404	-0.151459325394977	0.137858186544025	-1.09866036389945	0.271916237270416	0.37758795545295
C14orf68	0.528058110075696	0.0517976478527804	0.44307616579633	0.116904613363	0.906935642289225	0.93543992836255
C14orf70	0.324041436984332	-1.05269923183385	0.848150238082511	-1.24117070840395	0.214542693137345	0.313431014896996
C14orf72	1.26430216555664	-0.639818237984714	0.402870721157941	-1.58814777143827	0.112252928093995	0.185292029265021
C14orf73	0.386536712155929	0.165166805219036	0.694086847957655	0.237962735794573	0.811909996592873	0.865113720744533
C14orf79	289.864163745839	-0.447489417658605	0.0890272459277904	-5.02643222302487	4.99688973266697e-07	4.45312512152046e-06
C14orf80	156.111282849116	0.570777529075549	0.122128898228271	4.67356651337924	2.96013779402512e-06	2.11670449653073e-05
C14orf86	50.9243791720576	-0.745448776968042	0.168410233062887	-4.426386469578	9.5824778854432e-06	5.88754231268246e-05
C14orf93	193.153892277212	0.228020559287077	0.0686434804030929	3.32180941216965	0.000894357605548212	0.00302845550332876
C15orf17	1407.22114012077	-0.107152770527694	0.0560461028929512	-1.91186835474282	0.0558930815472679	0.104347677623385
C15orf2	0.313625145858375	0.885355597109151	0.910157141112253	0.972750261594615	0.330677438333383	0.441295863089014
C15orf21	5.05399108107018	-0.292400441456832	0.140646948086267	-2.07896755269432	0.037620332896947	0.0746512266157669
C15orf23	393.124689968893	0.0724091538872538	0.0961574981154732	0.75302660017526	0.451433929641424	0.559478174534586
C15orf24	1768.08747678986	-0.575158924328391	0.076480314881194	-7.52035246222318	5.46287687428701e-14	6.25760367561641e-12
C15orf26	20.2719567364303	-1.71268993107554	0.404420043599653	-4.23492840718592	2.28624532593665e-05	0.000125544537226396
C15orf27	20.4326609150758	-0.261434591105484	0.153606551219641	-1.70197552792954	0.0887599558807966	0.152810553949861
C15orf28	1.90806144070082	1.38639529330019	0.324988316004962	4.26598503707138	1.99022119194933e-05	0.000111155707813717
C15orf29	471.738737671751	-0.431477243255956	0.0877942950787601	-4.91463873442891	8.89463212604675e-07	7.40903493074686e-06
C15orf32	0.0360259868878461	0.0723118969871534	2.90284728369466	0.02491067904031	0.980126209235956	NA
C15orf33	30.4938806242263	-0.280042483959491	0.114737825895044	-2.44071631804893	0.0146581642130642	0.033718652495235
C15orf34	9.12976764785406	-0.19501989578355	0.146462019470913	-1.33153903304113	0.183011710390513	0.276230180416533
C15orf37	57.7425819367461	0.0671883847993866	0.0992539283837609	0.676934262386127	0.498447664231448	0.60331691974279
C15orf38	305.095889135002	0.20910260194467	0.0709532978211241	2.94704556892937	0.00320825921275566	0.00921807773298636
C15orf39	509.985010067384	0.357781745021792	0.0965538727942417	3.70551418257694	0.000210962324091126	0.000864616221721377
C15orf40	254.70742450625	-0.491240382071193	0.0776108621540625	-6.32953131091431	2.4590699187221e-10	6.31770191689976e-09
C15orf41	157.519855606289	0.0724946102495695	0.0695665497912586	1.04209006292675	0.297369925236274	0.405051937851182
C15orf42	129.676311825572	0.917557885949176	0.145596034650038	6.30208019163889	2.93677143749662e-10	7.39704447226039e-09
C15orf43	0	NA	NA	NA	NA	NA
C15orf44	935.301054389934	-0.306791783124162	0.0575137885004726	-5.33423012329714	9.59507759244136e-08	1.07916119713862e-06
C15orf48	52.0769045127193	-0.975532279803449	0.240692905862122	-4.05301633759937	5.05614699649072e-05	0.000252582632180247
C15orf5	0.212163257034614	0.52085775960288	1.08059364522872	0.482010755756975	0.629798305600632	NA
C15orf50	0.048218327983956	0.21179505659933	2.12492631502299	0.0996717180741574	0.920604954412734	NA
C15orf51	10.9324353211063	0.322384861833233	0.277040649704014	1.16367349765337	0.244556353549094	0.347212566413025
C15orf52	517.21147638744	0.10065228991476	0.136207815175758	0.738961195324087	0.459930560961478	0.567700151567002
C15orf53	0.0299702542382843	-0.0324022272384419	2.90284728369466	-0.011162222491154	0.991094019950856	NA
C15orf54	0.92014135316003	-0.68944617398341	0.352973912679919	-1.95324965731563	0.050790019594431	0.0965139172005755
C15orf55	0.143660796401223	0.138456833880594	1.18284382826096	0.117054196481843	0.906817106044904	NA
C15orf56	4.71443013222939	-0.682264283179765	0.221704419427628	-3.07735986924013	0.00208843005282494	0.00636905648126228
C15orf57	346.928754502249	-0.576791706791368	0.0875519142841446	-6.58799652191983	4.458010876089e-11	1.5320594329396e-09
C15orf58	44.2880425812725	-0.080142148473166	0.0671034460817714	-1.19430749317264	0.232357707586358	0.333497337885781
C15orf59	406.646202328645	0.0402902862125291	0.156354318600432	0.257685790665572	0.796649413259947	0.853438525418904
C15orf60	0.0126962520425744	-0.0667418749510231	2.90284728369466	-0.0229918657195345	0.981656761451033	NA
C15orf61	121.511184866863	-0.501450211649177	0.089796098971017	-5.58432067089047	2.34615462140358e-08	3.20861176511955e-07
C15orf62	26.0677636536631	0.570681759129024	0.141726000410137	4.02665535947917	5.65758629723181e-05	0.000277766945043453
C15orf63	826.713431151336	-0.378768025947821	0.0779010051368478	-4.86217122978636	1.16105118456797e-06	9.38442449585189e-06
C16orf11	0.19890803422507	0.0316229744653664	0.805562283376134	0.0392557783773511	0.968686463161146	NA
C16orf13	711.454740897044	-0.318066219148458	0.0727934018985119	-4.36943748819301	1.24566991079718e-05	7.38612847866025e-05
C16orf3	3.77371281124133	0.523737042803245	0.238827663230472	2.19294965967921	0.0283110062359539	0.0588403023399277
C16orf42	1014.77930436348	-0.0672222192141524	0.0552046744458476	-1.21769070987083	0.223341528738569	0.323369620226586
C16orf45	2231.8445920056	0.125435470102122	0.0981170820498635	1.27842642159268	0.201099112836414	0.29839657139027
C16orf46	68.0136035116915	-0.251049628162612	0.0841730709393852	-2.98254091671905	0.0028586643434616	0.00835123774412174
C16orf48	382.219328681311	-0.115771490627365	0.090226669639853	-1.28311829628064	0.199450634668452	0.296464188269893
C16orf5	1953.95919605552	-0.03165448115436	0.0835180328118647	-0.379013730192446	0.704677667972519	0.780881334698243
C16orf52	341.609017102857	-0.0262389872423471	0.0595264326846903	-0.440795560206577	0.659361008014893	0.744324379840748
C16orf53	809.529719272254	0.0540585023546368	0.0919015450365069	0.588221910014272	0.556383352851909	0.655459887725925
C16orf54	35.9659326957748	-0.235120048804533	0.154607765848575	-1.52075186853689	0.128322117020632	0.207139839556507
C16orf55	254.77335788125	-0.193144494417704	0.0809611131591348	-2.38564524227902	0.0170491886213473	0.0383793476237714
C16orf57	977.54161161234	0.0464842734627376	0.0579886713423187	0.801609562466635	0.422778844412109	0.533351311896371
C16orf58	2051.69444377045	0.0285805723916408	0.0495021343859784	0.577360405690635	0.563696015531755	0.661587753267839
C16orf59	109.262265514201	0.412511500407588	0.135717519737979	3.03948599417376	0.00236982221307996	0.00711500545576461
C16orf61	542.746921365767	-0.514303526114305	0.0907023373518313	-5.67023454003549	1.42602165106763e-08	2.07654911813164e-07
C16orf62	1344.08625166812	-0.00441466877521637	0.0402061790459143	-0.109800754012833	0.912567393045965	0.939255536916307
C16orf63	839.338214276279	-0.458451894156362	0.0677079390398159	-6.77102125183234	1.27876486692644e-11	5.54151984742294e-10
C16orf68	203.139350743286	-0.0474548233304289	0.0653519530638818	-0.726142389104143	0.467751485220319	0.575221738936147
C16orf7	646.677475782064	0.0138892263944364	0.0787314253544135	0.17641273902909	0.859969697317746	0.901789798050282
C16orf70	434.101551219377	0.0575158878965149	0.0510268717549402	1.1271686058424	0.25967120119514	0.364183645191717
C16orf71	43.5585368086536	-0.653030645676562	0.200719456134955	-3.25344965680603	0.00114012925528908	0.00375601475125824
C16orf72	993.742670591639	0.00506421191543817	0.0483231072383121	0.104798971027739	0.916535326555396	0.941830256143777
C16orf73	0.792843641747799	0.160630845130597	0.36089497704305	0.445090276530604	0.656254515377524	0.741915398407867
C16orf74	45.1566894472281	-0.632522640085885	0.207506823495538	-3.04820164190642	0.00230215393585631	0.00694663362121474
C16orf75	176.875504035491	0.168039233682044	0.137280936603005	1.22405366571753	0.220931983455323	0.32083662713667
C16orf78	0	NA	NA	NA	NA	NA
C16orf79	54.9983545542434	0.27262711343107	0.159366345882628	1.7106943873323	0.0871375443603767	0.15047835584569
C16orf80	954.84813256866	-0.177029457972007	0.0854848186760723	-2.07088768173944	0.0383692935956848	0.075886217532695
C16orf81	1.16437130400445	0.690545465395079	0.3575515498379	1.93131722043478	0.0534438350852393	0.100568581162807
C16orf82	0.195166017655259	-0.0383299245166116	1.53697813079067	-0.0249384970083429	0.980104020602	NA
C16orf86	68.9015424189938	-0.166633421906144	0.104667483602583	-1.59202663683826	0.111378719586368	0.184237940861041
C16orf87	130.67956342418	0.237966977335988	0.0750506074717685	3.17075351356087	0.00152044097197665	0.00483102657951027
C16orf88	364.526158335805	0.0214866095945637	0.0636282562711215	0.337689744364655	0.735597004051221	0.805662394692884
C16orf89	296.164940955667	-0.470184361334126	0.201227404704984	-2.33658214706618	0.0194609216484257	0.0429061192748912
C16orf90	0	NA	NA	NA	NA	NA
C16orf91	289.721633622003	-0.358469026992157	0.0767523951888023	-4.67046046068483	3.00525326641122e-06	2.14555278853273e-05
C16orf92	0.853940993643772	0.248916226965807	0.370164344756798	0.672447874819892	0.501298613451276	0.605952027443725
C16orf93	124.67717903977	-0.384391319768806	0.112837238942657	-3.40659983681585	0.000657774886807528	0.00232055935359597
C17orf100	142.403980702641	-0.177633480124376	0.0950446307967594	-1.86894807876336	0.0616300383493466	0.113005160040237
C17orf101	380.143539731464	-0.318287046738734	0.0734744373005598	-4.33194262429974	1.47799462064197e-05	8.56046868200488e-05
C17orf102	9.74762371286098	-0.20865304955628	0.260020024723404	-0.802449925840268	0.422292743049321	0.532995475687244
C17orf103	342.297383607081	0.241578917269781	0.0738866606977741	3.26958770349543	0.00107704343120404	0.00357305830414564
C17orf104	23.1870033882499	0.119019953235448	0.0983245988746102	1.2104799266685	0.226094788746133	0.326357547219718
C17orf105	0	NA	NA	NA	NA	NA
C17orf106	303.554426368327	-0.601323293780106	0.0985049382175121	-6.10449896889742	1.03123656716891e-09	2.15648353767043e-08
C17orf107	16.481993557836	0.191933346768399	0.130717184788862	1.46830997835835	0.142020041708489	0.225128993396691
C17orf108	487.033094270811	-0.676548215662167	0.113004120464602	-5.9869340417024	2.13833445713689e-09	4.00581321636977e-08
C17orf28	385.431166784673	0.427611620983064	0.124188565443169	3.44324470982592	0.0005747789692546	0.002062826777704
C17orf37	1093.16252867557	-0.647072801249303	0.0977921398063212	-6.61681810553323	3.67012620519662e-11	1.29165459245119e-09
C17orf39	304.439061745786	0.205474383569069	0.0566031755516279	3.63008579583411	0.000283327028372431	0.00111082478270107
C17orf42	230.655244373478	-0.59552936327225	0.082519287305145	-7.21685054149903	5.32053970043321e-13	3.92149942510618e-11
C17orf44	49.7065792327036	-0.759631916997534	0.119448724546662	-6.35948119061572	2.02436316707959e-10	5.34598343564749e-09
C17orf46	0.560034244976444	1.0049545359615	0.398382260758808	2.522588566186	0.0116494610831551	0.0277084920142125
C17orf47	2.09297845098764	0.120486950871189	0.233607429195198	0.515766777136665	0.606017309021222	0.698209187778931
C17orf48	146.685424847645	-0.49031219702562	0.0791703203614732	-6.19313140059266	5.89805185903789e-10	1.33474043821373e-08
C17orf49	1140.50662969033	-0.34011578487983	0.0714477660858372	-4.76034176451669	1.93265408538139e-06	1.46037189376046e-05
C17orf50	1.35855678910321	-0.0265735617516355	0.333369240394886	-0.0797120985732165	0.936466236805413	0.955324113829971
C17orf51	526.916242192134	0.49094123351885	0.0970093293792381	5.06076309011081	4.17581818375039e-07	3.8178909108575e-06
C17orf53	85.3187745774836	0.376070856869294	0.104079617814887	3.61329974844992	0.000302324861678238	0.00117455396682252
C17orf54	0.074043368612325	-0.348663576275044	2.90284728369466	-0.12011089189345	0.904395304374194	NA
C17orf55	1.72962382281387	0.206598518183421	0.314734940551957	0.65642066248223	0.511553499394963	0.615328615685841
C17orf56	341.728774497378	0.216965781062336	0.0787430795805784	2.75536316610926	0.00586270213553616	0.0154687258224006
C17orf57	14.8281970006572	0.329036119565999	0.18874467692696	1.74328688322865	0.0812835154003964	0.142337170492768
C17orf58	322.616219216919	-0.371365080197284	0.0760661596121331	-4.8821326341556	1.04944627117427e-06	8.5670638859728e-06
C17orf59	214.054503559216	-0.035885191530864	0.0627563029741862	-0.57181812551362	0.567445196390098	0.664816574063813
C17orf60	56.3938508955255	-0.613409408549539	0.15792106161563	-3.88427865335999	0.000102634145362041	0.000461905022570305
C17orf61	474.952437098641	-0.919242415838968	0.118843365639852	-7.73490729490683	1.03478479900497e-14	1.61366810332485e-12
C17orf62	1801.1549436017	-0.130511274262082	0.0544025007386181	-2.39899402582862	0.0164401829144687	0.0371806148810118
C17orf63	643.409614721935	0.329083622027105	0.0723122212810483	4.55087143220356	5.34241867716365e-06	3.54009054864079e-05
[truncated: 18,502 more rows]

## Sheet: DEG
gene_name	baseMean	log2FoldChange	lfcSE	stat	pvalue	padj
AATK	509.882210637121	0.900331	0.204580604114316	4.40086053051695	1.07822414717524e-05	6.51572e-05
ABCA2	3296.98198663284	0.689603	0.135974681952064	5.07155289333076	3.94582559436521e-07	3.63347e-06
ABCC2	4.55402121215398	1.02803	0.229633923962866	4.47681290093043	7.57655927509541e-06	4.79947e-05
ABCC6P2	23.3005137826938	-0.71553	0.157101784821375	-4.55456460191301	5.24941911043817e-06	3.48617e-05
ACAP3	2162.7076716528	0.81572	0.131313850132198	6.21199019692858	5.23176918242537e-10	1.20441e-08
ACN9	501.941035710194	-0.705561	0.144015452698563	-4.8992046401351	9.62253825692016e-07	7.91999e-06
ACVR2B	267.100952999102	0.8495	0.121287687084537	7.004005047445	2.48747145614242e-12	1.42922e-10
ACYP2	659.351679950286	-0.719049	0.118671100864945	-6.05917597736496	1.3682064251584e-09	2.74007e-08
ADA	168.014216552566	-0.644565	0.115351603029431	-5.58783096947892	2.29923272380585e-08	3.16127e-07
ADAM22	237.839176309197	0.683911	0.128705974263354	5.3137502327894	1.07391791733512e-07	1.1798e-06
ADAM6	666.514843332732	-1.70049	0.3644484236086	-4.66593297973177	3.07219833143178e-06	2.18814e-05
ADCY1	594.804219280747	0.871648	0.189330076318051	4.60385151671492	4.14748218821747e-06	2.84038e-05
ADCY5	174.449579543256	1.10855	0.202897480418852	5.46359169614047	4.6659607213756e-08	5.79507e-07
ADD2	740.11736547905	0.687764	0.141980074952617	4.84408472105575	1.27196653390342e-06	1.01531e-05
AFAP1L2	598.207367329358	0.820543	0.167938348752749	4.8859759985063	1.02917736279607e-06	8.41306e-06
AGAP2	2754.62766293044	1.38799	0.299061228896638	4.64114328714867	3.46486747670467e-06	2.43027e-05
AGAP5	36.1375481665404	0.589404	0.115767918638542	5.09125412355742	3.55702914402884e-07	3.3231e-06
AGPAT4	760.989865166828	0.583271	0.104427880208169	5.58540012795941	2.33162751636629e-08	3.1936e-07
AGPHD1	21.9196656276349	-0.689137	0.141468134705099	-4.8713254754848	1.10852055437529e-06	8.99217e-06
AHCY	3730.24541438176	-0.594009	0.0807337330038726	-7.35763263302421	1.87200374145134e-13	1.71766e-11
AHDC1	1294.77374690908	0.617005	0.107986964758504	5.71369757743796	1.10547386694739e-08	1.6595e-07
AIF1	1232.55038625151	-0.837522	0.154631758865159	-5.41623727009009	6.08663192531006e-08	7.32677e-07
AKT3	835.553324418281	0.762649	0.114795751148233	6.64352984162681	3.06258437285953e-11	1.1082e-09
ALDH1L2	239.974309576752	0.594668	0.128705633305138	4.62037182074202	3.83052938960373e-06	2.64853e-05
ALG5	704.627387851871	-0.754609	0.096804036808447	-7.7952193195617	6.42967049502741e-15	1.09086e-12
ALKBH7	841.723897120158	-0.638957	0.100759051513274	-6.34143661760685	2.27632406426537e-10	5.89876e-09
AMOTL2	1225.84739635291	0.890897	0.150287695817533	5.92794269052757	3.06753509478045e-09	5.43513e-08
ANKRD13B	485.30686089651	0.586813	0.117944620731778	4.97532835835177	6.51371294201908e-07	5.62645e-06
ANKRD36	130.280045208294	0.634181	0.133632898472867	4.74569582893394	2.07790768699889e-06	1.55316e-05
ANKRD36B	20.5503952410912	0.858127	0.161306502292989	5.31985603589227	1.03849395411139e-07	1.15002e-06
ANKRD44	110.118588637468	0.650637	0.11628476788542	5.59520611397948	2.20359821975556e-08	3.05077e-07
ANO8	692.032127483316	0.619769	0.120718021540278	5.13402417199001	2.83611647115221e-07	2.72461e-06
ANXA2	6250.14717665252	-0.677725	0.151988178565411	-4.45906140834367	8.23193359642893e-06	5.14753e-05
ANXA2P1	72.0114521455849	-0.659897	0.151757091688813	-4.34837469520918	1.37150141890133e-05	8.01856e-05
ANXA2P2	3194.95546060551	-0.667273	0.153136484376377	-4.3573775627798	1.31630088798863e-05	7.74619e-05
ANXA4	793.256394242131	-0.66842	0.114647238094864	-5.83023539452217	5.53492414275139e-09	9.06558e-08
APBA1	514.759858318392	0.642776	0.127322454984591	5.0484108215167	4.45500340894674e-07	4.03215e-06
APC2	4274.54896951961	0.659735	0.146364379251491	4.50748212648996	6.56014548998867e-06	4.24839e-05
APOBEC3G	279.391883458277	-0.764433	0.144284229648989	-5.2981047397265	1.17010844284284e-07	1.26611e-06
APOC1	3328.02968741018	-0.864455	0.165057405454533	-5.23729844283205	1.62944092977431e-07	1.68996e-06
APOC2	1821.90051633918	-0.895977	0.174911826420933	-5.12244791981482	3.0159441148791e-07	2.87129e-06
ARHGAP11B	17.253764083625	0.786736	0.16998689467894	4.6282167155622	3.68827944060576e-06	2.56199e-05
ARHGAP33	1065.76767335476	0.810023	0.125980518502029	6.42974468719332	1.27818450728699e-10	3.70157e-09
ARHGEF4	1573.03588638791	0.607985	0.127381083484348	4.7729647148632	1.81533605357778e-06	1.38159e-05
ARID1A	2162.8425877431	0.629044	0.0733904661044643	8.57119671148393	1.02415131431995e-17	8.00797e-15
ARL10	84.396499815492	0.624252	0.111127721022562	5.61742680705636	1.93822234761792e-08	2.71472e-07
ARPC3	2912.50337909261	-0.619815	0.0763674727814052	-8.11621887926829	4.80932952937963e-16	1.23559e-13
ARVCF	639.544117269138	0.753134	0.119704255352415	6.29162120531539	3.1416736637816e-10	7.79308e-09
ASB16	17.7007900021031	0.600272	0.137416805329986	4.36825835344372	1.25241287747977e-05	7.41877e-05
ASPM	326.981028363756	0.75379	0.159473589046342	4.72673819466519	2.28155121118022e-06	1.67955e-05
ASXL2	292.812952643071	0.60409	0.113577764391223	5.31873889085472	1.04488961211387e-07	1.15468e-06
ATAD5	83.5174824873215	0.605461	0.130503421318047	4.6394281331771	3.49374601910872e-06	2.44671e-05
ATCAY	1668.95622191317	1.41944	0.275962500978263	5.14361245507385	2.69505205562441e-07	2.61868e-06
ATP10B	204.405751443494	1.324	0.258350488228575	5.12483695717368	2.97795328199257e-07	2.84114e-06
ATP2A1	17.7560016701707	1.01343	0.190335983912857	5.32443571575684	1.01266906004843e-07	1.12977e-06
ATP5E	3516.56986475608	-0.786508	0.0784919841717291	-10.0202287722199	1.24215089475219e-23	5.58471e-20
ATP5EP2	217.313671238841	-0.716156	0.0897077556647255	-7.98321720481171	1.42567710477328e-15	3.12675e-13
ATP5G1	1165.47981430493	-0.626839	0.101009324058811	-6.20574932937086	5.44368897181085e-10	1.24238e-08
ATP5G3	3679.5592289211	-0.617707	0.0970217107074507	-6.36668909788008	1.93152132366073e-10	5.12557e-09
ATP5H	2037.24513106803	-0.616809	0.0732027801800819	-8.42603712099717	3.57568788380697e-17	1.87528e-14
ATP5I	1684.9569960736	-0.625815	0.0881033580343786	-7.10319412379039	1.2190597973998e-12	7.82985e-11
ATP5J	2098.9492905473	-0.627584	0.0792038929343899	-7.92365443621844	2.30630001030444e-15	4.71324e-13
ATP5J2	3478.66932064021	-0.889703	0.105151685354865	-8.46114251164468	2.64770602717948e-17	1.70058e-14
ATP5L	2705.04511581947	-0.657279	0.0902926406134662	-7.27943124958859	3.3523045469671e-13	2.74036e-11
ATP5O	3664.1955057596	-0.630696	0.0900109093067148	-7.00688661968624	2.43679574146956e-12	1.40459e-10
ATP6V0A4	13.6155380919656	3.64479	0.543391061936431	6.70748063039626	1.98013233561588e-11	7.77526e-10
ATP6V0B	3930.86768662769	-0.701754	0.0997901721655529	-7.03229378506698	2.03165450012193e-12	1.21791e-10
ATP6V0E1	4072.14874716418	-0.693562	0.0842088098297005	-8.23621738883354	1.77740844839589e-16	5.51119e-14
ATP6V1F	3805.01050464739	-0.644914	0.0928031773685823	-6.94926837422409	3.67185448826411e-12	1.90852e-10
AZGP1	658.720701347662	-1.24482	0.269133879021637	-4.62527568927826	3.74100471579805e-06	2.59461e-05
AZI1	275.833255244934	0.609998	0.10837690631329	5.62848740765439	1.81796771446204e-08	2.56426e-07
B2M	55648.03141197	-0.5884	0.114487012418617	-5.13945180540408	2.75541150757032e-07	2.66092e-06
B4GALNT1	721.153197925452	1.4596	0.229089120325613	6.3713232474416	1.87404185220265e-10	4.993e-09
B9D1	280.645443571383	-0.71485	0.111244906300529	-6.42591334851569	1.31080059194843e-10	3.75972e-09
B9D2	142.880795946676	-0.675802	0.105290971727894	-6.41842711291458	1.37689501665489e-10	3.93049e-09
BACH2	184.531185988265	0.761916	0.143064144373314	5.32569592093907	1.00567250652231e-07	1.12335e-06
BAHCC1	621.658723268166	0.823244	0.110577154619634	7.44497526504319	9.69625845367663e-14	1.00217e-11
BAT2	6385.20586156952	0.625492	0.0747769745428247	8.36476408198489	6.02353288903699e-17	2.74423e-14
BAT2L1	4782.49296674031	0.694078	0.096934819037337	7.16024973897192	8.05302175385894e-13	5.50667e-11
BCAS4	888.74106485645	-0.841979	0.120003012034046	-7.01631634532105	2.27793983790868e-12	1.33008e-10
BCL7A	548.047817003562	0.715314	0.147027260079295	4.86518128643977	1.14351943870996e-06	9.2552e-06
BCOR	519.421204000285	0.791608	0.120457495858028	6.57167525272165	4.97522813768988e-11	1.66619e-09
BCR	1813.75819046319	0.583997	0.10828190462121	5.39330579055281	6.91730840112067e-08	8.17351e-07
BET1	603.718374224161	-0.671406	0.0894522581846565	-7.50575138707725	6.10772380720641e-14	6.82244e-12
BLOC1S1	2139.49542600603	-0.725038	0.101104590844366	-7.17116815777121	7.43604970531068e-13	5.14346e-11
BMP8B	164.656342892207	1.02319	0.216242812544986	4.7316828094091	2.22666160333972e-06	1.64588e-05
BMS1P4	12.5642411007544	0.686461	0.153430013348618	4.47410094707962	7.67334863315544e-06	4.84882e-05
BMS1P5	29.8232573878249	0.637251	0.13271639143811	4.80160219807403	1.57401142319455e-06	1.21594e-05
BOLA3	326.528938986144	-0.683149	0.0810823452747771	-8.4253704644517	3.5961062343511e-17	1.87528e-14
BRCA2	83.8240821770752	0.691778	0.133692725482398	5.17438930272161	2.28657625050227e-07	2.26816e-06
BRD3	963.020714382222	0.608247	0.0954268344493782	6.37396411483033	1.8420370882925e-10	4.92964e-09
BRIP1	85.0860470113898	0.774703	0.16082495848126	4.81705630107601	1.45691590118964e-06	1.14117e-05
BRP44L	1337.82007404661	-0.670844	0.105603681893354	-6.35246993895553	2.11884842501029e-10	5.54463e-09
BRSK2	391.650611279196	0.941273	0.191058100891948	4.9266310893682	8.36594924563911e-07	7.01741e-06
BRWD3	101.917064554551	0.938951	0.139432788212496	6.73407455830573	1.64976570443548e-11	6.7584e-10
BTBD12	294.119838884994	0.58415	0.0945126641754162	6.18065083152784	6.38378706010787e-10	1.42439e-08
BTNL9	81.3051295317762	0.87103	0.200024240232969	4.35462383277272	1.33295613180806e-05	7.82167e-05
C10orf11	48.1399782426285	-0.881561	0.150033644194055	-5.87575361138276	4.20924000711323e-09	7.1462e-08
C10orf12	30.0128206690692	0.705614	0.11733860919547	6.01348940507843	1.81571803052501e-09	3.47012e-08
C10orf125	89.98853784505	-0.790669	0.137222191901689	-5.76196450587723	8.31404853278902e-09	1.29679e-07
C10orf41	66.0348918388841	-0.589584	0.122564121738318	-4.81041176913121	1.50619680030762e-06	1.17465e-05
C11orf31	1351.13924583062	-0.673496	0.0923516618136026	-7.2927353006921	3.03724464139519e-13	2.52879e-11
C12orf29	693.311596066674	-0.619947	0.0906361792828374	-6.83994565901656	7.9223226346162e-12	3.65321e-10
C12orf34	431.551397884389	0.970044	0.177710084745913	5.45857539725392	4.79970040456171e-08	5.94475e-07
C12orf51	1041.93877510951	0.681428	0.0954146218340157	7.14175399044623	9.21474117589588e-13	6.16052e-11
C12orf57	2416.20909102594	-0.792458	0.130331762933278	-6.08031081282979	1.19949804464515e-09	2.45134e-08
C12orf60	37.4339926962462	-0.901786	0.129889393787228	-6.94271993433476	3.84621474867375e-12	1.97066e-10
C12orf62	742.587184414998	-0.830959	0.104995467793451	-7.91423503888373	2.48777927355085e-15	4.91651e-13
C13orf26	39.2371411852002	-1.32773	0.245956041049504	-5.39822965534186	6.73016842352262e-08	7.98913e-07
C14orf142	324.589732880916	-0.801452	0.0886577738768455	-9.03984319461836	1.56896717082466e-19	3.13515e-16
C14orf179	412.98379667647	-0.64635	0.0835707302074436	-7.73416439609633	1.0408446396001e-14	1.61367e-12
C14orf2	1364.86998836897	-0.605474	0.0873846254601523	-6.92884446216762	4.24291975513877e-12	2.12548e-10
C14orf49	32.9339113394984	0.71007	0.153847931887444	4.61539931500183	3.92340215773809e-06	2.70339e-05
C14orf86	50.9243791720576	-0.745449	0.168410233062887	-4.426386469578	9.5824778854432e-06	5.88754e-05
C15orf42	129.676311825572	0.917558	0.145596034650038	6.30208019163889	2.93677143749662e-10	7.39704e-09
C17orf106	303.554426368327	-0.601323	0.0985049382175121	-6.10449896889742	1.03123656716891e-09	2.15648e-08
C17orf108	487.033094270811	-0.676548	0.113004120464602	-5.9869340417024	2.13833445713689e-09	4.00581e-08
C17orf37	1093.16252867557	-0.647073	0.0977921398063212	-6.61681810553323	3.67012620519662e-11	1.29165e-09
C17orf42	230.655244373478	-0.595529	0.082519287305145	-7.21685054149903	5.32053970043321e-13	3.9215e-11
C17orf44	49.7065792327036	-0.759632	0.119448724546662	-6.35948119061572	2.02436316707959e-10	5.34598e-09
C17orf61	474.952437098641	-0.919242	0.118843365639852	-7.73490729490683	1.03478479900497e-14	1.61367e-12
C19orf53	2080.47370593246	-0.641652	0.088785620238895	-7.22697621906971	4.93866540603818e-13	3.68535e-11
C19orf70	1183.92377516261	-0.735601	0.0980630241388337	-7.50130933434943	6.31834854902089e-14	7.01415e-12
C1D	202.205410557978	-0.681293	0.0925222275871379	-7.36355546782669	1.79075337085708e-13	1.67734e-11
C1orf106	314.057486692063	0.732623	0.166016077984248	4.41296356891474	1.01965159688412e-05	6.19926e-05
C1orf192	214.899582724707	-1.29635	0.277859688250663	-4.66547157723867	3.07910057134406e-06	2.19082e-05
C1orf220	7.20966053461728	0.887037	0.169221580407085	5.241867291483	1.58959683403152e-07	1.65724e-06
C1orf31	351.384762617998	-0.618633	0.0883313339150664	-7.00354794101884	2.49560460820382e-12	1.42933e-10
C1orf53	76.3293374868735	-0.768537	0.140500792409456	-5.46998417245052	4.500757702289e-08	5.59762e-07
C1orf54	429.600914740392	-0.795403	0.128434308905012	-6.19307006691786	5.90034835620506e-10	1.33474e-08
C1orf57	759.906646087104	-0.618241	0.0963568241910587	-6.41615804047368	1.39756365140308e-10	3.97058e-09
C1orf88	719.979413774011	-0.962864	0.199189410353022	-4.83391143094005	1.33876167551153e-06	1.0611e-05
C1QA	6404.77226858278	-0.73205	0.164248442144191	-4.45696525444146	8.31280703287427e-06	5.19089e-05
C1S	4904.219220733	-0.80696	0.186703146610082	-4.3221528345939	1.54514092162193e-05	8.9035e-05
C20orf111	1089.03112836639	-0.605167	0.0799495016754777	-7.56936970150799	3.7503941816819e-14	4.48686e-12
C20orf117	457.856450320247	0.710598	0.149304846086953	4.75937830235633	1.94190168677382e-06	1.46613e-05
C20orf196	152.170059371158	-0.793745	0.11185306544228	-7.0963187397851	1.28123796129145e-12	8.1133e-11
C20orf199	1876.32079226236	-0.767034	0.113212222827727	-6.77518374809505	1.24248244836991e-11	5.43669e-10
C20orf24	1814.36024077978	-0.669212	0.0652049458207218	-10.2632065033051	1.03221137375692e-24	6.18776e-21
C20orf30	3249.8228972615	-0.841348	0.0562774740337878	-14.9499956534697	1.55759352670307e-50	2.80118e-46
C20orf7	260.399119500598	-0.715411	0.0990087504640695	-7.2257327578799	4.98407018363403e-13	3.70386e-11
C21orf125	1.63202441075912	1.60566	0.355148089918865	4.52110623257341	6.15173048120391e-06	4.01716e-05
C21orf63	599.363741614998	-0.63241	0.131570219831993	-4.80663334736054	1.53493117611737e-06	1.19138e-05
C21orf7	355.634441512663	-0.882205	0.176188892693803	-5.0071530885163	5.52409906002898e-07	4.85797e-06
C22orf41	10.978542160922	-1.3578	0.248114207463736	-5.47249465902617	4.43744137653576e-08	5.53418e-07
C22orf45	3.08522497950685	1.09264	0.234260136207618	4.66423582730263	3.09765982503537e-06	2.20104e-05
C2orf27A	59.6016224092972	0.75516	0.164482478852374	4.59112734283892	4.40858236561617e-06	3.00774e-05
C2orf28	3152.48570586119	-0.77138	0.0850935590051117	-9.06508035895127	1.24512438212983e-19	2.79904e-16
C2orf48	8.76475273406462	1.54235	0.262612501782647	5.8731154344952	4.27680444821268e-09	7.2492e-08
C2orf62	12.2510559883972	-1.7	0.336841856983415	-5.04686609940877	4.49115871610025e-07	4.05671e-06
C2orf64	1274.67379833247	-0.581796	0.0878478951762395	-6.62276606598432	3.52538714409831e-11	1.25795e-09
C2orf7	719.140337329153	-0.693214	0.103092300471107	-6.72420357877174	1.7655544333834e-11	7.12314e-10
C2orf76	130.218956248819	-0.632638	0.0939172796528976	-6.73611968102338	1.6267231294313e-11	6.69451e-10
C2orf79	495.47597605204	-0.716089	0.0977658882068823	-7.32452528029865	2.39745866922665e-13	2.093e-11
C4BPA	6.55457144046355	-3.0895	0.704905130996229	-4.38286179562085	1.17130422638016e-05	6.9936e-05
C4orf21	112.870963202081	0.708064	0.128850439343196	5.49524317516632	3.90172389173265e-08	4.95891e-07
C4orf36	10.9089433080229	-0.586316	0.134164883783559	-4.3701157889174	1.24180671031384e-05	7.36565e-05
C4orf52	646.399388400261	-0.601797	0.0887913960168796	-6.77764449368015	1.22150965126236e-11	5.35796e-10
C5orf28	269.368048322417	-0.584157	0.0757783441315337	-7.70876527240275	1.27040825988258e-14	1.91992e-12
C5orf32	1076.04879374743	-0.629162	0.113360049407594	-5.55012263069624	2.85469282827035e-08	3.79164e-07
C5orf62	1852.94177722738	-0.912286	0.151808156919474	-6.00946934951088	1.86131547708266e-09	3.54596e-08
C6orf174	984.509449016535	0.807872	0.126619317992233	6.38032523466434	1.76712286337621e-10	4.76231e-09
C6orf204	44.906659329389	0.685968	0.139807806572539	4.90650543071845	9.2713422981283e-07	7.6766e-06
C6orf217	20.8626302688728	-0.692989	0.155401200335632	-4.45935295181162	8.22074507065566e-06	5.14233e-05
C6orf225	835.035457383545	-0.61583	0.115748814024345	-5.32040271592639	1.03537803317075e-07	1.14869e-06
C6orf57	152.199271825338	-0.667502	0.111418917978684	-5.99091766025522	2.0866027075426e-09	3.92116e-08
C7orf36	438.072232771705	-0.624845	0.0941980956145798	-6.63330771350296	3.28246505313755e-11	1.17828e-09
C7orf55	740.145457638734	-0.646401	0.110251033252615	-5.86298842603398	4.54609921872504e-09	7.65515e-08
C7orf59	2578.00541134666	-0.751828	0.101350481545321	-7.41810200602231	1.18810584236702e-13	1.19368e-11
C8orf56	59.0488044959498	-1.15854	0.178689647335395	-6.48351157960878	8.96119968307154e-11	2.75956e-09
C8orf76	510.615709839315	-0.613996	0.0844652889626917	-7.26921110799023	3.61592935825277e-13	2.90307e-11
C9orf102	83.8666121883288	0.61039	0.120448433665052	5.06764690972931	4.02763629534155e-07	3.69556e-06
C9orf116	152.098735023444	-0.621764	0.140752002089839	-4.4174468576697	9.98736150710408e-06	6.09476e-05
C9orf140	667.005960872932	0.909322	0.187721613274698	4.84399218095541	1.27255942280026e-06	1.01534e-05
C9orf45	154.362184343773	0.834301	0.15027621026525	5.55178228626216	2.82771632318356e-08	3.76136e-07
CACNA1G	277.008079070579	1.03635	0.208436566233167	4.97202995316581	6.62554653183984e-07	5.71481e-06
CACNA2D2	80.4574494051613	1.18892	0.233986878953512	5.08113067321695	3.7519490009276e-07	3.48168e-06
CACNG4	2381.21979671011	0.903034	0.209501605178484	4.31039369671691	1.62964154107081e-05	9.33359e-05
CACNG5	7.17483958062037	2.51858	0.482887816831298	5.21567023102663	1.83153766276268e-07	1.86937e-06
CAPSL	18.3960526491888	-3.45715	0.659887279267796	-5.23900089071032	1.61448259478133e-07	1.67735e-06
CAPZA2	5622.74147153436	-0.792305	0.104083170651699	-7.61223312200613	2.69400070300779e-14	3.43609e-12
CASC1	53.0782743645374	-0.979096	0.218176077118703	-4.48764303798939	7.20154599758465e-06	4.60244e-05
CASC5	140.948938336444	0.923241	0.160354963148355	5.7574839296521	8.53768940694917e-09	1.32592e-07
CASP4	534.73464278421	-0.656692	0.130204326808425	-5.04354604952256	4.56982724365575e-07	4.11949e-06
CBX2	289.214024926304	0.947609	0.169774393144892	5.58157557507845	2.38349442844416e-08	3.24979e-07
CBX6	571.307823039869	0.608883	0.11522121460121	5.28446917999185	1.2606977026126e-07	1.34395e-06
CCDC109B	726.648083515405	-0.705429	0.126573442057685	-5.57328117374369	2.49985605451425e-08	3.38535e-07
CCDC136	381.263208792745	0.702641	0.157016079960005	4.4749597990911	7.64256909547202e-06	4.83958e-05
CCDC144A	16.7887703002733	0.924268	0.204445742573769	4.52084921046041	6.15920504920128e-06	4.02059e-05
CCDC144B	17.9536780068268	1.20533	0.238594364033611	5.05178350848589	4.37703646269618e-07	3.97158e-06
CCDC144C	11.2971401273092	1.10244	0.241617587519365	4.56276473061083	5.0484376420973e-06	3.37263e-05
CCDC150	35.6922962222172	0.79899	0.177523758564708	4.50074786160443	6.77147918251651e-06	4.36481e-05
CCDC153	14.2399037830011	-1.03702	0.235675729086125	-4.40019864005947	1.0815182996629e-05	6.52905e-05
CCDC56	1373.32115936237	-0.614901	0.0929178765690582	-6.61768537794093	3.64866528644249e-11	1.28915e-09
CCDC65	70.8568625689232	-1.06753	0.22148932975194	-4.81976785027759	1.43725368805628e-06	1.12724e-05
CCDC72	1536.69679118488	-0.651713	0.0870670867683521	-7.48518154981086	7.14482998956622e-14	7.64904e-12
CCL2	1847.60671861324	-1.39906	0.230544600792474	-6.06848978879811	1.29118623850716e-09	2.612e-08
CCL26	7.37466308494684	-1.51928	0.297390544453122	-5.10871521528266	3.24356804911389e-07	3.05885e-06
CCL7	14.0589208893783	-2.54206	0.468759057118176	-5.42295174659566	5.86228217079816e-08	7.07566e-07
CCNB3	13.3888970774834	1.03966	0.194825995700922	5.3363630319397	9.48294450798154e-08	1.07059e-06
CCND1	1802.0260158245	0.693839	0.155117997194308	4.47297264595076	7.71396485560794e-06	4.86936e-05
CCT6B	64.5300363165362	-0.588026	0.115927173784767	-5.07237463844934	3.92881950010029e-07	3.62152e-06
CD244	16.5746641864693	-0.863076	0.196628828064639	-4.3893655452631	1.1368183945132e-05	6.81485e-05
CD48	170.313070764839	-0.896948	0.189450099280719	-4.73448040500315	2.19616986519946e-06	1.62468e-05
CD58	414.535008729552	-0.89314	0.119823194391326	-7.45381609774783	9.0678373614844e-14	9.48116e-12
CD63	20896.5143941903	-0.738029	0.106170858435325	-6.95133491570962	3.61845676374249e-12	1.90276e-10
CDC25A	224.897599877091	0.623443	0.14394066267923	4.33125117593759	1.48264431648714e-05	8.57911e-05
CDHR1	194.791107329612	0.930521	0.200654543852465	4.63742860281107	3.52770407444273e-06	2.46569e-05
CDKL5	14.7278380713903	1.46083	0.25455962410759	5.73864527008756	9.54368806385623e-09	1.46695e-07
CDON	272.226578446021	0.913093	0.168115624800386	5.43133885956077	5.59328090793738e-08	6.78284e-07
CECR2	130.874997949246	0.849966	0.145903219508481	5.82554497051247	5.69265272110379e-09	9.29008e-08
CECR6	228.090005594574	0.771845	0.126109685604538	6.12042313362931	9.33271952029654e-10	1.97458e-08
CELSR3	509.775619802917	1.27581	0.200849822286454	6.35207837660462	2.12425035246648e-10	5.54463e-09
CENPE	211.392298795861	0.64156	0.145466952720858	4.41034630962548	1.03205433703091e-05	6.26173e-05
CENPF	1130.73684939715	0.972336	0.157396225303537	6.17763310546064	6.50697110564082e-10	1.45008e-08
CENPJ	203.808102683724	0.80858	0.140649283003037	5.74891036503652	8.98204168782959e-09	1.38655e-07
CEP152	81.9798724917224	0.648628	0.121324427763769	5.34622971001117	8.98052229728382e-08	1.02025e-06
CETN2	2082.37725896786	-0.775911	0.104941975584481	-7.39371905883654	1.42777919518136e-13	1.3955e-11
CGRRF1	471.035922514229	-0.62057	0.0989895139013515	-6.26904729914763	3.63263782930193e-10	8.79265e-09
CHCHD5	428.207704361143	-0.619581	0.0889811462835521	-6.96306052886796	3.32958674098188e-12	1.77683e-10
CHD3	1734.77485741557	0.71842	0.109053135416746	6.58779835900249	4.46396320540675e-11	1.53206e-09
CHD7	1044.5958498158	1.16243	0.142877123021634	8.1358392800557	4.0909424034232e-16	1.09808e-13
CHML	236.818252630458	0.657186	0.116728203531457	5.63004906543838	1.80158363646645e-08	2.54514e-07
CHRNA4	91.2654602788204	1.3297	0.296722182398606	4.48128569943048	7.41947097731233e-06	4.71157e-05
CHRNB2	234.365847498658	0.873679	0.201572738378409	4.33431090963898	1.46217405549955e-05	8.48523e-05
CHTF18	310.646868140808	0.785106	0.138728640932886	5.65929185956374	1.51998870466255e-08	2.19034e-07
CIB1	1332.78969283805	-0.631576	0.0804601498209291	-7.84955189704079	4.17526377979923e-15	7.58464e-13
CIT	803.607503475459	0.768671	0.126198227002641	6.09098067512863	1.12221098695044e-09	2.32242e-08
CKLF	653.547246842256	-0.626165	0.0856286658659886	-7.31255722883853	2.62105586439162e-13	2.21301e-11
CLDN23	48.8035934327275	-0.913153	0.199558872988713	-4.57585534986255	4.74278175997804e-06	3.20294e-05
CLEC12A	33.5773417395451	-1.31329	0.245528581076797	-5.3488169751224	8.85310143106978e-08	1.00768e-06
CLEC2B	227.992562001751	-1.00762	0.188540604326574	-5.34429775094279	9.07682593130123e-08	1.02924e-06
CLEC3B	206.89398297759	-0.927832	0.191288418943691	-4.85043339339967	1.23191998452137e-06	9.87733e-06
CLEC4A	80.2900229410567	-0.886328	0.147077575962932	-6.02626082801107	1.67796315460284e-09	3.26232e-08
CLIC1	5324.88458504474	-0.629012	0.113963811386744	-5.51940265163523	3.40153967883207e-08	4.39217e-07
CLSPN	120.269532945843	0.887915	0.166399247791326	5.33605373216217	9.49912627691316e-08	1.07172e-06
CLYBL	128.882121325852	-0.711877	0.10296824459942	-6.91355947910877	4.72641369790053e-12	2.35192e-10
CMBL	709.642067437048	-0.67085	0.0922399864292286	-7.27287989287492	3.51903191589559e-13	2.83795e-11
CMC1	217.85540400688	-0.733604	0.0987627900357911	-7.42794204596067	1.10300262138692e-13	1.1144e-11
CNIH	1488.48831476408	-0.608468	0.0943070026378738	-6.45199687564665	1.10385855502e-10	3.28129e-09
CNKSR1	19.393211231654	1.1266	0.220978641510587	5.09822023087967	3.42861790947539e-07	3.21986e-06
CNTN3	48.7699000398716	1.55134	0.344868955175767	4.49833704994781	6.84870595480023e-06	4.41003e-05
CNTNAP5	18.7683349418643	1.99183	0.321485550698906	6.19572097198618	5.80188310456456e-10	1.31578e-08
COL11A1	678.010381979895	1.49299	0.307089656145521	4.86172873404949	1.16365015694659e-06	9.40121e-06
COL11A2	150.13546093311	1.06039	0.208110522565594	5.0953450926313	3.48106563190187e-07	3.2623e-06
COL19A1	8.50448612977951	1.77043	0.337699325756086	5.2426216911869	1.58310913236996e-07	1.65143e-06
COL9A1	143.33476708969	1.22506	0.256429052015741	4.77738464802799	1.77589864161961e-06	1.35559e-05
COMMD1	414.778440648759	-0.688946	0.0935978515875595	-7.36070002802271	1.82948266700215e-13	1.69743e-11
COMMD10	709.399411178336	-0.849088	0.100785597328831	-8.42469982331912	3.61676266829487e-17	1.87528e-14
COMMD7	1712.12875062603	-0.735904	0.0856108812514399	-8.59591671285146	8.26026988132159e-18	6.8559e-15
COMMD8	346.996150473554	-0.678474	0.0975049505037464	-6.95835226911619	3.4427549362087e-12	1.81567e-10
COPZ2	347.022470339944	-0.892165	0.162810686992945	-5.47977064679187	4.2587753130934e-08	5.32984e-07
COX5B	2606.46220962616	-0.760072	0.0928948885305061	-8.18206193070459	2.7902757493907e-16	8.0936e-14
COX6A1	3032.90484834019	-0.691525	0.0969543147686555	-7.13248209382443	9.85749044664631e-13	6.51754e-11
COX7A2	2731.13318259725	-0.671077	0.118543005883765	-5.66104138099648	1.50457136931084e-08	2.17161e-07
COX7A2L	1605.4667645216	-0.594432	0.0910261424364247	-6.53034373114517	6.56189203500355e-11	2.1073e-09
COX7B	2359.71483960985	-0.872972	0.108831787808714	-8.02129600758481	1.04635236892388e-15	2.3522e-13
COX7C	2403.5030555678	-0.608561	0.0784983844164291	-7.75253258949453	9.00776886700593e-15	1.45942e-12
CPVL	1545.90207216853	-0.961709	0.149348165576277	-6.43937861590721	1.19963609867033e-10	3.51945e-09
CREM	691.076081393381	-0.686078	0.104210618631355	-6.58357405664228	4.59271659752762e-11	1.56911e-09
CRIPT	712.172745425228	-0.640346	0.103931753579246	-6.1612190705185	7.21870437394794e-10	1.5929e-08
CRYL1	1647.46973937044	-0.649619	0.111209383613117	-5.84140273361318	5.17630980638836e-09	8.54044e-08
CSMD1	152.865923610558	0.915947	0.199447218543757	4.59242693997865	4.38120911492325e-06	2.99133e-05
CSMD2	429.590141010971	0.802561	0.172974387769458	4.63976797764342	3.48800568722466e-06	2.44364e-05
CSMD3	52.2189003471809	1.41721	0.315366821011846	4.49385249702863	6.99460866156644e-06	4.48453e-05
CSNK1E	2759.11519696639	0.616566	0.0918469809180837	6.712974851472	1.90695990607878e-11	7.55573e-10
CSRNP3	24.2272431164914	0.824484	0.178820747341273	4.61067343559101	4.01366622363806e-06	2.76135e-05
CST6	4.74275538138703	-1.43262	0.328787425047616	-4.3572839891443	1.31686357134348e-05	7.74697e-05
CSTA	75.5847089904758	-0.877385	0.189493456485641	-4.6301624471143	3.6537896842181e-06	2.54098e-05
CTBS	461.160916436928	-0.60455	0.106854226435678	-5.65770442428425	1.53411039192224e-08	2.20892e-07
CTSH	1859.01770106608	-0.73737	0.154551694908479	-4.77102369644284	1.83291973127175e-06	1.39438e-05
CTTNBP2	486.956341117931	0.874531	0.135462009640176	6.45591041415747	1.07570232486643e-10	3.21353e-09
CXCL14	2320.53886698234	-1.30673	0.266303446959734	-4.90693561106035	9.2510386499582e-07	7.66685e-06
CXXC4	22.3558098697075	1.05797	0.211071023763434	5.01236827868634	5.37641782887739e-07	4.74694e-06
CYB5R1	1632.62281543397	-0.829181	0.125957153664585	-6.5830374281021	4.60933048223989e-11	1.56997e-09
CYBA	1479.22361406664	-0.668385	0.122506031318935	-5.45593335086001	4.87162648110821e-08	6.01313e-07
CYP27C1	36.2324005375769	1.33144	0.282458033144296	4.71376718426825	2.4317849824247e-06	1.77633e-05
DAAM2	2582.14429938751	1.09169	0.226144210949861	4.82738805426724	1.3833540324873e-06	1.09115e-05
DACT2	32.8008309509025	1.55087	0.346611432250038	4.47437549034238	7.66349668693582e-06	4.84592e-05
DAZ1	17.8127039641061	5.14849	0.71145120643682	7.23660075420656	4.60069914646414e-13	3.49991e-11
DCN	4953.48060208979	-1.31151	0.223076507132856	-5.87920383750263	4.12244467738307e-09	7.0273e-08
DDI2	31.285468246298	0.585707	0.131121317582831	4.46691033228623	7.9357371893708e-06	4.98834e-05
DDX12	96.7691185867402	0.981087	0.171115726978078	5.7334715916878	9.83955530023007e-09	1.50348e-07
DERA	844.02210684987	-0.591135	0.0811304999160633	-7.28622206514942	3.18767400362342e-13	2.62968e-11
DGCR9	42.8177823432775	0.946432	0.17031643433998	5.55690500097254	2.74600113468627e-08	3.67042e-07
DGKD	816.141289023919	0.609683	0.0802476206245487	7.59752409637839	3.01850027068817e-14	3.74377e-12
DGKH	7.19341941010081	1.1267	0.186138265114532	6.05303623543446	1.42140877920682e-09	2.83085e-08
DGKI	63.0073377335371	1.00445	0.167755052584968	5.98759975452102	2.12960331868286e-09	3.99362e-08
DIP2C	717.249510438767	0.763432	0.0918223578488694	8.31422450238437	9.23541769380245e-17	3.61065e-14
DLG5	1645.71834072582	0.668808	0.100316512027084	6.66698142036109	2.61118134102546e-11	9.72246e-10
DLGAP1	231.948182577633	0.980437	0.190562834744232	5.14495459476063	2.67585523181457e-07	2.60545e-06
DLL1	460.261423278463	1.00838	0.182366077851512	5.52940232635977	3.21323646365383e-08	4.18139e-07
DNAH10	32.542130023992	0.719201	0.14400463892447	4.99429277186646	5.9051759470967e-07	5.14529e-06
DNAH8	4.21043635762017	3.89149	0.784388641686533	4.961169547297	7.00699957350944e-07	6.01498e-06
DNAJB9	1524.85357061539	-0.585248	0.0978916814288808	-5.97852698728735	2.25164315182704e-09	4.19622e-08
DNAJC19	438.735145884284	-0.645554	0.0880814949194139	-7.32905334000274	2.31784127488371e-13	2.04334e-11
DNM3	460.06008274258	1.07001	0.167022421937142	6.40640329298069	1.48992538670702e-10	4.16716e-09
DOCK3	438.94775186993	0.709924	0.164413574274842	4.31791747628617	1.57508295741938e-05	9.04993e-05
DOT1L	1291.47582239759	0.704393	0.130962782647313	5.37857270074203	7.50786642026375e-08	8.73925e-07
DPCD	320.526307544023	-0.591727	0.101754014028601	-5.81526683464083	6.0537241007551e-09	9.82934e-08
DPM3	666.237530140232	-0.704082	0.109597479155436	-6.42425439007541	1.32517432996373e-10	3.79489e-09
DPY30	806.987806938715	-0.630905	0.0759538413666886	-8.30642825155249	9.86258183942232e-17	3.69518e-14
DPYSL4	789.461104863767	0.883675	0.147288873242823	5.99960570829448	1.97797230240314e-09	3.74047e-08
DSCAM	450.891329224436	0.899297	0.200574250164714	4.48361323837304	7.33896283259946e-06	4.66869e-05
DSCAML1	260.001584622941	1.91639	0.249892148524436	7.66887702470446	1.73508686637916e-14	2.4189e-12
DSTN	5825.82105917763	-0.601243	0.0680532722138768	-8.83488165732719	1.00204281724749e-18	1.63825e-15
DUSP23	319.2734097281	-0.737682	0.145102691389148	-5.08386450031617	3.6983181935895e-07	3.43542e-06
DYNLT1	2077.38930949796	-0.62507	0.0990697788954488	-6.3093936985303	2.80130693250965e-10	7.08561e-09
DYX1C1	106.54545409972	-0.593384	0.108936423728832	-5.44706805158392	5.12068756574891e-08	6.26466e-07
E2F2	188.546005781258	0.984064	0.164734557952819	5.97363686274475	2.32021960701218e-09	4.2973e-08
EAF2	70.7740941458514	-0.663874	0.116761848945092	-5.68571084200035	1.30269652859433e-08	1.91716e-07
EDEM2	834.511792695427	-0.616636	0.0697122187636172	-8.84545793235075	9.11537179086579e-19	1.63825e-15
EDN2	3.88929489882431	-1.87355	0.419154450443391	-4.46982657848456	7.82830446409386e-06	4.93312e-05
EEPD1	900.123231268821	0.58531	0.118750766672311	4.92889756159726	8.26949167815056e-07	6.94946e-06
EFEMP1	8157.46839433634	-1.00723	0.185889055040351	-5.41845873256545	6.01150107320251e-08	7.24603e-07
EFS	1122.72854866807	0.709921	0.0991132591165865	7.16272291560598	7.90901101455273e-13	5.43759e-11
EIF2C2	125.664126532055	0.591976	0.103814303793117	5.70226280625664	1.18227361211327e-08	1.76595e-07
EIF4EBP3	259.538194593333	-0.669372	0.111894408437294	-5.98217148328334	2.2018228125819e-09	4.11617e-08
ELF3	38.5047434834615	-1.33832	0.249505793696917	-5.36387936115354	8.14533160796256e-08	9.3422e-07
ELFN2	358.751385144787	1.96176	0.266997235260867	7.347509285097	2.01934273274376e-13	1.82492e-11
EMG1	537.51114690735	-0.820482	0.0981579882019113	-8.35878743282623	6.33661671297519e-17	2.77946e-14
EP300	1307.58855164416	0.639228	0.0916738859586603	6.97284239959594	3.10600517784335e-12	1.67421e-10
EPB41	526.865059583504	0.696635	0.134722293808133	5.17089506011301	2.3297537915994e-07	2.30464e-06
EPHB1	939.21722905316	1.37731	0.246869110765996	5.57911716013592	2.41742379807502e-08	3.28609e-07
ERN1	43.5677066275179	0.674908	0.156606697000819	4.30957389367375	1.63569399191513e-05	9.36527e-05
ESPL1	232.896179136496	0.717946	0.143128015658822	5.01611176291548	5.27276639300001e-07	4.66661e-06
ETHE1	492.744133381865	-0.625801	0.0854877139655471	-7.32035754710748	2.47311121552112e-13	2.12806e-11
ETNK2	481.347507336884	-0.88479	0.1698954190083	-5.20785219506438	1.91038998958845e-07	1.93667e-06
ETV2	16.8288602189695	-0.70738	0.154503664591731	-4.5784022704019	4.68540980911352e-06	3.17014e-05
ETV3	101.071193211728	0.691716	0.125311033992223	5.5199925626442	3.39014011156419e-08	4.38305e-07
EYS	5.38835538628518	0.913586	0.203638617293741	4.48630886876775	7.24676660112427e-06	4.61985e-05
FAM106A	3.54457732210817	1.38244	0.260627102767769	5.30429929405237	1.13106609923017e-07	1.23056e-06
FAM106C	6.19104666852969	1.37216	0.232508177822781	5.90157586660925	3.60045789401433e-09	6.20811e-08
FAM115A	269.332996327098	0.71397	0.128653079668883	5.54957722286953	2.86361242911731e-08	3.80068e-07
FAM123B	128.875406270366	0.702481	0.091520036841882	7.67570708074118	1.64508660038116e-14	2.32955e-12
FAM125B	1290.29130252368	0.693143	0.118768944046713	5.83606150593522	5.34491721126395e-09	8.78638e-08
FAM165B	582.358999345569	-0.674131	0.0895803181101685	-7.52543907036244	5.254345238889e-14	6.05732e-12
FAM171A2	269.07389150288	0.632384	0.143041739470512	4.42097484827776	9.82566114443891e-06	6.00424e-05
FAM195A	343.843725081365	-0.659658	0.107520789182849	-6.13516877407086	8.50688324975133e-10	1.83439e-08
FAM26F	165.478741701766	-0.886658	0.184360973907303	-4.80935805026307	1.51415775949173e-06	1.17984e-05
FAM53B	775.143185673271	0.593399	0.0923025368170258	6.42884437571723	1.28577679048286e-10	3.70567e-09
FAM58A	381.820279988181	-0.603076	0.0967909007454845	-6.23071243989513	4.64318711893864e-10	1.08446e-08
FAM82A1	80.6549110614828	-0.613039	0.120875714558184	-5.07165131794613	3.94378494923261e-07	3.63345e-06
FAM95B1	209.276134435847	1.34552	0.230629291577519	5.83411653742438	5.40763176483458e-09	8.87325e-08
FAM96A	935.033433744507	-0.651588	0.0793623384305412	-8.21029087800659	2.20653293622783e-16	6.50529e-14
FAS	447.896367397976	-0.724845	0.152027438789564	-4.76785886247799	1.86194143100358e-06	1.41467e-05
FASN	2777.7922985025	0.810963	0.0994579025764753	8.15382741087097	3.52583946942395e-16	9.90761e-14
FBN3	192.989224389761	1.54091	0.31443604738744	4.90054063381062	9.55732874012437e-07	7.86992e-06
FBXO22	482.579532046424	-0.598654	0.077699107721682	-7.70477620318106	1.31072791174986e-14	1.94811e-12
FBXO6	259.511078850675	-0.617929	0.116207868021191	-5.31744630314757	1.05233725764295e-07	1.16106e-06
FCER1G	1503.48108806584	-0.765214	0.143838468184203	-5.31995365572459	1.03793688394852e-07	1.15002e-06
FCGR1A	838.031889698909	-0.709021	0.156396469579392	-4.53348223487036	5.8019148020893e-06	3.81087e-05
FCGR1B	427.327408007242	-0.736223	0.161031389556148	-4.57192343822854	4.83267526312551e-06	3.249e-05
FHOD3	361.41453698757	0.607203	0.136040129253083	4.46340800932094	8.06662389763589e-06	5.06e-05
FLJ16779	828.207848333375	1.19166	0.269233742248906	4.42611965891051	9.59433164623313e-06	5.8909e-05
FLJ26850	17.1173039682583	-0.88446	0.201547670833689	-4.38834058719777	1.14218808888612e-05	6.83792e-05
FLJ35776	106.559074890094	-0.689474	0.119280599102052	-5.78026640134515	7.45824300893541e-09	1.1776e-07
FLJ36777	12.9023934481758	-0.8136	0.186839473765594	-4.35453831700959	1.33347655726937e-05	7.82167e-05
FLJ42627	46.9705289838299	0.783942	0.141385249660559	5.54472451220841	2.94417343034629e-08	3.89038e-07
FLJ45340	867.894773085634	0.688657	0.134451993202107	5.12195344599726	3.02386555926227e-07	2.87731e-06
FLRT1	158.918301072933	1.25521	0.192084162347753	6.53469336565547	6.37399952386436e-11	2.05799e-09
FNIP2	429.854041687368	0.635668	0.0986098310384354	6.44629399489498	1.14618227150905e-10	3.38472e-09
FOXM1	1342.33860889949	0.615575	0.140340535801109	4.38629153393369	1.15299562912936e-05	6.89573e-05
FOXO3B	469.880876841376	0.582938	0.0901082406278036	6.46930706155296	9.8453349801525e-11	2.97078e-09
FSIP1	42.1138123652287	-0.681755	0.149367427772277	-4.5642808406537	5.01209474183553e-06	3.35294e-05
FTL	65891.8231116034	-0.741317	0.129498490360748	-5.72452580434651	1.03723042402826e-08	1.5768e-07
FUNDC2	1989.07142290813	-0.789839	0.106022568963456	-7.44972680972004	9.35337102183928e-14	9.72318e-12
FUNDC2P2	2.30354485943188	-1.0182	0.205125891701063	-4.96376700853331	6.91388788207128e-07	5.94641e-06
FUT9	369.022096946684	0.976609	0.224929317585693	4.34184806898129	1.41289225631276e-05	8.22845e-05
GABARAPL2	4258.5920809797	-0.624812	0.100659141158262	-6.20720276284895	5.39359908650478e-10	1.23723e-08
GABRR2	2.4399304773397	1.31409	0.279032230111823	4.70946214960617	2.48371330628382e-06	1.80912e-05
GAL3ST1	134.557966783105	1.21352	0.2385126352522	5.08787946382696	3.62089376466143e-07	3.374e-06
GALNT13	564.997322887088	1.45318	0.280584244396552	5.17913682612697	2.22914930036925e-07	2.21977e-06
GDF3	1.20739459855973	-2.84574	0.640081790202143	-4.44589474032131	8.75267999402161e-06	5.42974e-05
GEMIN7	377.445115764289	-0.591337	0.0913261529093896	-6.4750046772465	9.48090043333484e-11	2.88502e-09
GFOD1	39.0036067002996	0.60493	0.135364220255411	4.46890273639477	7.8621868584543e-06	4.94729e-05
GFRA1	171.812184519305	1.50102	0.287488896149069	5.2211460025242	1.77819275026513e-07	1.8253e-06
GIMAP2	313.846633934161	-0.660918	0.116849995872561	-5.65612677129929	1.54827128074347e-08	2.22753e-07
GLCCI1	921.740503713344	0.975914	0.160788703243962	6.06954208790677	1.28275472490545e-09	2.59994e-08
GLIPR1L2	55.8974882243816	-0.847282	0.177401673259112	-4.77606388502528	1.78759623391387e-06	1.36221e-05
GLRX	999.672045010269	-0.751148	0.127026588890582	-5.91331008775755	3.35300081573172e-09	5.8544e-08
GMFG	508.960815599557	-0.912113	0.13218425817363	-6.90031856696642	5.1886050712753e-12	2.51514e-10
GNASAS	9.35162862820649	-0.887153	0.158776991534454	-5.58741224967893	2.30478150704919e-08	3.16648e-07
GNG10	954.045414948735	-0.645654	0.0892537502247991	-7.23391163959825	4.69277163706371e-13	3.546e-11
GNG11	864.408750184222	-0.795674	0.156003240393599	-5.10036793532872	3.38993845355498e-07	3.18853e-06
GOLT1B	1277.89331081956	-0.640465	0.0949534567519981	-6.74504075605937	1.52984075248459e-11	6.40853e-10
GPA33	5.06775794135598	-1.12915	0.225428074027881	-5.00891457487622	5.47378603667662e-07	4.82315e-06
GPC2	370.007460094326	1.1082	0.21367866838507	5.18627320498007	2.1454400894348e-07	2.1519e-06
GPR160	91.5862919834732	-0.637126	0.139234135168098	-4.5759303086687	4.74108366834804e-06	3.20294e-05
GPR17	830.456008110128	1.87379	0.364089069927084	5.1465257281616	2.65355084706744e-07	2.58793e-06
GPR173	233.387207098737	0.775238	0.105443295588235	7.35217952018114	1.95000660609489e-13	1.78015e-11
GPR179	21.7436185600094	1.11326	0.231858100621817	4.80146232564442	1.57511145457117e-06	1.21626e-05
GPR65	227.860049765493	-0.697318	0.153929360311361	-4.53011867387631	5.89505640698276e-06	3.86217e-05
GPRIN1	519.619061145546	0.63594	0.14238699492131	4.46627526012534	7.95931903759088e-06	4.99966e-05
GPRIN2	3.74222729842586	2.17415	0.408747133229009	5.31906994393516	1.0429903683847e-07	1.15358e-06
GPX1	6858.67922242045	-0.862515	0.111467923341674	-7.7377867898165	1.01162304460279e-14	1.59588e-12
GRID2	107.174028766965	1.5872	0.323395857116665	4.90791976289066	9.20474953276347e-07	7.63905e-06
GRLF1	2330.49150563786	0.664371	0.0954590113545717	6.9597499928211	3.40877119227769e-12	1.80304e-10
GSG2	58.9583406208333	0.680063	0.141407522559705	4.80924130882173	1.51504223878293e-06	1.18001e-05
GSTO1	1697.84972539175	-0.945397	0.126134116280167	-7.49517404917162	6.62104451448344e-14	7.26015e-12
GTF2A2	983.242205253311	-0.63406	0.0823582858250564	-7.69879498337676	1.37355339293281e-14	1.9921e-12
GTF3A	2354.48225337313	-0.600776	0.0891184934998796	-6.74131197942313	1.56962761896847e-11	6.5343e-10
GTSE1	307.555090903104	0.719737	0.144169513472975	4.99229376844539	5.9666409656627e-07	5.19381e-06
GUCY1A2	69.1565182692314	0.593337	0.125079956177069	4.74366190309242	2.09889046445381e-06	1.56624e-05
H2BFXP	22.5018865227385	0.756585	0.166082875421199	4.55546836104664	5.22689829741424e-06	3.47507e-05
HAMP	335.306975511957	-1.15024	0.246441775193827	-4.66739380826695	3.05044316642361e-06	2.17522e-05
HAX1	1958.49634575276	-0.583899	0.0842911176742356	-6.92716648079714	4.29353216883648e-12	2.14486e-10
HBXIP	2148.71144131357	-0.693968	0.0905946648906926	-7.66014515367184	1.85723053235991e-14	2.56926e-12
HCN3	159.284755057366	0.600169	0.124108719769342	4.83583565897522	1.32587432272671e-06	1.05274e-05
HCST	204.428019640425	-0.683834	0.142754475421475	-4.79027966143421	1.6654902144197e-06	1.27782e-05
HEBP2	632.913108471317	-0.617583	0.0979589592326608	-6.30450526429139	2.89115897659422e-10	7.30261e-09
HERC2	1344.63086263004	0.623697	0.0885809650377557	7.04097740900453	1.90895959012665e-12	1.15982e-10
HIC2	130.089734643049	0.836969	0.111679552523401	7.49438370372712	6.66105978019969e-14	7.26015e-12
HIGD1A	3632.99426201502	-0.750671	0.0988669132261546	-7.59274382619378	3.13201368806917e-14	3.83171e-12
HINT1	4969.49548625004	-0.673086	0.0951135740426259	-7.07665154019306	1.47679249532887e-12	9.18984e-11
HIP1	1971.96530295166	0.633817	0.124000224040244	5.11142079195576	3.19744884056964e-07	3.01853e-06
HIP1R	1382.35337666221	0.81008	0.128628862867405	6.29780889116088	3.01882372672336e-10	7.55084e-09
HIPK2	4233.4074452122	0.700177	0.117113317809246	5.97862630224905	2.25027107420665e-09	4.19622e-08
HIST1H4J	71.305389159966	-0.895918	0.197023475227938	-4.54726432471357	5.43477247244804e-06	3.59599e-05
HLA-DMA	1670.05570343779	-0.611375	0.136288579651818	-4.4858879295881	7.26109026521179e-06	4.6257e-05
HLA-DMB	2303.35445481314	-0.803013	0.151104244011232	-5.31429784666774	1.07069368769865e-07	1.17842e-06
HLA-DRA	19901.7010839274	-0.930969	0.159915014330157	-5.82164588315314	5.82709110764561e-09	9.50085e-08
HLA-DRB1	4532.21168677872	-0.762077	0.177387319460535	-4.29611902680498	1.73814280402778e-05	9.87639e-05
HMGCS1	1714.51883902757	0.712996	0.11348504564662	6.28273497594696	3.32667905857532e-10	8.18025e-09
HNMT	1606.64420495785	-0.588912	0.129174113636234	-4.55905949946846	5.13832133337629e-06	3.42631e-05
HOPX	6987.08886002034	-1.24152	0.245556209597419	-5.0559363106742	4.28284257690893e-07	3.90137e-06
HOXB7	135.030986095263	-1.17501	0.260272295152935	-4.51455954235895	6.34484946212716e-06	4.12381e-05
HP	451.90301607636	-1.44645	0.334392905719383	-4.32561264647351	1.52108512048499e-05	8.78176e-05
HPGDS	149.391152134202	-0.737334	0.16838282169087	-4.37891731971132	1.19270367901729e-05	7.11429e-05
HSCB	254.001458831067	-0.585642	0.105147300957967	-5.56972527135633	2.55141315838691e-08	3.44221e-07
HSD17B8	216.124747082567	-0.732736	0.128223562715244	-5.71452052132662	1.10013773033308e-08	1.65508e-07
HSPE1	1875.21388841642	-0.621606	0.0762705790059181	-8.15000804285321	3.63900069473641e-16	1.00683e-13
IAH1	881.380485275319	-0.654309	0.0837902901890671	-7.80888934407719	5.76941246190546e-15	9.88163e-13
ICAM4	6.21954200077225	-1.14443	0.228142359012502	-5.01629348268226	5.26778419861488e-07	4.66449e-06
ICK	537.8046537129	0.592882	0.086275319302023	6.87197200461773	6.33203834252438e-12	3.01258e-10
IFI27L2	908.538945556361	-0.656443	0.104876371923842	-6.25921103194242	3.86929981825065e-10	9.29045e-09
IFT20	497.466231288758	-0.733266	0.0968802378535834	-7.56878435705032	3.76732918067476e-14	4.48686e-12
IGF2R	1604.86304936025	0.611802	0.123786852148269	4.94238160575864	7.7173971446873e-07	6.53435e-06
IGFBP3	8113.93329056616	-1.22462	0.231805603826659	-5.28295915190732	1.27113741895327e-07	1.35337e-06
IGFBP6	302.514389334762	-1.04031	0.241975233252412	-4.29925534423921	1.71372938307286e-05	9.76543e-05
IGFBP7	16267.1979696376	-0.838235	0.139816187376943	-5.995263394875	2.03155887950999e-09	3.83374e-08
IGJ	114.560309787973	-2.18375	0.394362811175819	-5.53741473378387	3.06969055487385e-08	4.03469e-07
IGSF9B	100.753493583464	1.69255	0.195381321404801	8.66282389897242	4.60219060536238e-18	4.5981e-15
IL15	41.1075160637433	-0.831684	0.191270571727595	-4.3482086514001	1.37253995308431e-05	8.02127e-05
IL18	366.214354538311	-0.735145	0.146597757491889	-5.01471036297088	5.31134137405562e-07	4.69612e-06
IL1RAPL1	6.69771039037803	1.53998	0.276044966133645	5.57874273993775	2.42263225317473e-08	3.29068e-07
IL20RA	65.6443802623061	-1.42578	0.264419507785234	-5.39209620969455	6.96404618743475e-08	8.21794e-07
IL7	35.7024762030428	-0.810511	0.168128313895199	-4.82078868125224	1.42991767241021e-06	1.12204e-05
INCENP	374.405244559153	0.640964	0.0903996333260563	7.09033530692785	1.33787446145457e-12	8.35428e-11
INHBC	7.1753441293995	1.86223	0.320623906517016	5.80815295681419	6.31657978157481e-09	1.02156e-07
INHBE	9.83852895957604	1.12143	0.257762700172317	4.35062903365663	1.35747544021312e-05	7.94689e-05
INMT	102.692477494601	-1.19948	0.254252962621522	-4.71765737258918	2.38575840412636e-06	1.74645e-05
IPMK	27.7383258431656	0.698781	0.14479573152378	4.82598032035592	1.39316265827359e-06	1.09768e-05
IQGAP3	354.276208518982	0.916705	0.142446514390893	6.43543455152995	1.23120573509178e-10	3.58866e-09
ISCA2	484.957368247202	-0.661414	0.0851505649717462	-7.76758758080361	7.99950262042634e-15	1.30785e-12
ITGAE	471.762374033355	-0.765163	0.1119766012269	-6.83324258071524	8.30163979132389e-12	3.7989e-10
ITM2B	15701.0658906398	-0.626052	0.0823143302301636	-7.60562024801082	2.83540728787697e-14	3.56587e-12
JARID2	434.82926356945	0.640418	0.0792190552573275	8.08413899375452	6.26049004256533e-16	1.50118e-13
KANK1	1572.69091872184	0.727432	0.111258329157101	6.53822282959895	6.22541260509844e-11	2.01726e-09
KBTBD3	168.459806873391	-0.598882	0.101019061862959	-5.9284032674034	3.05894523979118e-09	5.42525e-08
KCNA2	52.5767435083909	0.783132	0.152191048574782	5.14571332387661	2.66506152057749e-07	2.59634e-06
KCNA3	19.7337263596638	0.983402	0.226165099213465	4.34815782895027	1.37285797603495e-05	8.02127e-05
KCNB1	53.2183168737469	1.13282	0.230668020178007	4.91104488738619	9.05923448967037e-07	7.53916e-06
KCND3	95.4871573311412	0.860127	0.186132446998532	4.6210486530637	3.81805214776682e-06	2.64162e-05
KCNH7	12.031508935272	1.79922	0.293046537442217	6.13970502698699	8.2674854781743e-10	1.7849e-08
KCNH8	97.9316932837414	1.31735	0.2623771902781	5.02083630949704	5.14469888125398e-07	4.57126e-06
KCNJ8	429.325849376161	-0.654302	0.115925293276572	-5.64416948983698	1.65980501349833e-08	2.37281e-07
KCNJ9	142.710130385021	1.26712	0.226979644985241	5.58250982675007	2.37072210359047e-08	3.23939e-07
KCNN3	164.396582441444	0.693319	0.148747577826813	4.66104303090352	3.14610932117464e-06	2.23018e-05
KCNQ1OT1	58.8532079648309	1.01876	0.196675494978636	5.17990391726855	2.22000217525173e-07	2.21311e-06
KCTD16	34.3063854651401	1.31962	0.212151922266863	6.22016529814978	4.96631395122113e-10	1.15244e-08
KDM4B	1153.0994009417	0.615686	0.0896702904490283	6.86610967612536	6.59763577222496e-12	3.11422e-10
KDM6B	624.878431273492	0.709697	0.108462807667658	6.54322919688808	6.02044530131324e-11	1.965e-09
KIAA0087	6.57044827045074	1.26032	0.273502276500895	4.6080718726662	4.06420188092026e-06	2.79292e-05
KIAA0182	882.213834962849	0.712737	0.117839966430408	6.04835106508373	1.46335811106428e-09	2.90155e-08
KIAA0427	926.442888981615	0.612265	0.0933406007271159	6.55947268683952	5.39983825129825e-11	1.78841e-09
KIAA0467	777.56090732049	0.615437	0.0855286995040953	7.19568344836353	6.21486646242966e-13	4.43524e-11
KIAA0664P3	17.2355798513683	0.800039	0.175284633477484	4.56422733299076	5.01337310581624e-06	3.35294e-05
KIAA1161	332.42080821769	0.79097	0.14513180398321	5.45001054528991	5.03668335562312e-08	6.18714e-07
KIAA1244	153.517932845506	1.26878	0.197710965888729	6.41737021800113	1.38648467335057e-10	3.94534e-09
KIAA1409	154.479892980593	0.873542	0.192353012919441	4.54134815481208	5.58956373658181e-06	3.68485e-05
KIAA1549	774.00552300614	0.907219	0.131826635779282	6.88191307078825	5.90540484923506e-12	2.82454e-10
KIAA1958	87.3403053905464	0.820719	0.120094347581792	6.83394895679797	8.26084282761545e-12	3.78987e-10
KIF11	412.369210102533	0.724439	0.129613983318269	5.58920733160793	2.28108468482766e-08	3.14353e-07
KIF13A	598.449576119874	0.823606	0.0903351653515878	9.11722780411706	7.70704672686736e-20	1.98005e-16
KIF14	159.680408191991	0.748144	0.148542329940567	5.0365709737049	4.73945426964303e-07	4.24685e-06
KIF18B	358.406476195171	1.05305	0.159453926376956	6.60408476116085	3.99980641599333e-11	1.38866e-09
KIF1A	5003.56024676177	0.878459	0.172635838393889	5.08850724231031	3.60893001759088e-07	3.36459e-06
KIF1B	4781.44940393523	0.598229	0.0900595604926423	6.64259610405615	3.08205571114345e-11	1.11301e-09
KIF21B	944.323574342206	1.42059	0.18655910996067	7.61470896491659	2.64286286251275e-14	3.39495e-12
KIF26A	116.585054292253	1.2903	0.220462768225445	5.85266906087154	4.83746100446289e-09	8.07021e-08
KIF4A	477.97079408636	0.592235	0.132173442803255	4.48073963278463	7.43848103016539e-06	4.72198e-05
KIF4B	13.3515144195356	0.695832	0.143256601230682	4.8572402364801	1.19033141801326e-06	9.58233e-06
KIF5C	2307.797762735	0.635127	0.138363238245652	4.59028789723435	4.42635052343603e-06	3.01757e-05
KIF9	242.218682638881	-0.720623	0.113353037241377	-6.35733376651494	2.05285630697307e-10	5.40535e-09
KIFC1	501.532897751976	0.759529	0.149598103518593	5.07712752482362	3.8318370128963e-07	3.54484e-06
KLF12	662.902669088347	0.679805	0.105478951951806	6.44493714904595	1.15648331720809e-10	3.40596e-09
KLHDC9	206.195767404442	-0.830634	0.156814741605559	-5.29690978057008	1.17778849492698e-07	1.27292e-06
KLHL11	48.1424076092647	0.59876	0.127666207328482	4.69004595346783	2.731436982772e-06	1.96882e-05
KLRC4	12.5964820747346	2.12933	0.484257887264888	4.39710532151268	1.09704119855388e-05	6.61387e-05
KREMEN2	26.1342367268535	0.985698	0.220097291481818	4.47846488742233	7.51817335092229e-06	4.76416e-05
KRT10	813.031075647033	-0.608876	0.0898914897322988	-6.77345352005529	1.25743986102351e-11	5.48879e-10
KRT7	28.2878515731456	-1.26065	0.253897946656072	-4.96517318964555	6.86397884135455e-07	5.91196e-06
LARGE	565.053516335767	0.588324	0.103018742026037	5.7108482870839	1.12414426035783e-08	1.68472e-07
LAYN	404.441612056359	-0.734694	0.144322257864001	-5.09064961219853	3.56838887122566e-07	3.33198e-06
LCOR	20.6555840970062	1.00611	0.146828231999382	6.85232341464522	7.26600526049149e-12	3.40291e-10
LGALS1	8383.6387533911	-0.703891	0.139933452698611	-5.03018497582772	4.90006867447715e-07	4.38172e-06
LGALS3	4558.75360517444	-0.973868	0.198522965923485	-4.90556718143359	9.31577471990031e-07	7.7063e-06
LGR5	79.979790843096	1.63465	0.295590731736552	5.53011923089621	3.20013203419087e-08	4.17037e-07
LGR6	312.937957605903	-2.04104	0.312747634612835	-6.52615909461918	6.74776466043788e-11	2.15718e-09
LHX4	5.14913001073018	1.26875	0.224127244431918	5.66085429625641	1.50621273824794e-08	2.17223e-07
LILRA5	32.7975119733371	-1.2925	0.269049069254102	-4.80396970707223	1.55550373446804e-06	1.20475e-05
LIMS2	381.826010331305	0.855054	0.174433768897374	4.9018860947371	9.4920871947925e-07	7.83054e-06
LINGO3	44.8161429796215	1.00755	0.201854384078547	4.9914787334056	5.9918781030673e-07	5.21325e-06
LMNB1	1177.91204074373	0.623486	0.128975913404092	4.8341284622923	1.33730212083716e-06	1.06041e-05
LMTK2	222.720834293957	0.740764	0.127264704254771	5.82065303742656	5.86181421306303e-09	9.54881e-08
LOC100128842	25.6036576621996	0.895336	0.17474698769281	5.12361366714029	2.99734812732059e-07	2.85661e-06
LOC100131193	23.4586985242192	0.710619	0.138089306797387	5.14608378272685	2.65980664893793e-07	2.59263e-06
LOC100190986	83.7175066094767	0.73418	0.158971581993898	4.6183118667386	3.86874510851361e-06	2.67221e-05
LOC100233209	67.0607197478559	-0.726127	0.161521607850429	-4.49553803012014	6.93942534835112e-06	4.45989e-05
LOC100271836	174.942233549209	0.667363	0.102014858573693	6.54182040616733	6.07744605153797e-11	1.98001e-09
LOC146481	9.3276089430343	4.06048	0.729476997842255	5.56628566465231	2.60226512873343e-08	3.50031e-07
LOC150776	345.329595475849	0.585568	0.118490246002601	4.94190619602634	7.73624375546034e-07	6.54723e-06
LOC254559	565.314233123643	1.31602	0.214546605351331	6.13396720632172	8.57141947704453e-10	1.84388e-08
LOC283174	843.321888043827	1.56972	0.188620969749843	8.32210478044669	8.6414865732594e-17	3.45352e-14
LOC283761	32.3986563582271	1.07807	0.223794883683466	4.81722451370394	1.45568865606443e-06	1.1407e-05
LOC388789	622.461477591255	-0.733831	0.0798707599961814	-9.18772474887601	4.01238055193476e-20	1.20264e-16
LOC400940	89.7258784870197	1.25611	0.2435205922567	5.15811304571054	2.49451003274759e-07	2.44876e-06
LOC440957	164.708457359297	-0.634654	0.106586498133531	-5.95435266508871	2.61103226757571e-09	4.76719e-08
LOC441208	69.2729454496539	0.606694	0.110033553738084	5.51371794109183	3.51331496473661e-08	4.52604e-07
LOC442421	35.1751455396487	0.739102	0.1487167509118	4.969863169407	6.70001665461024e-07	5.77628e-06
LOC541471	561.513023182508	-0.786464	0.158030214880097	-4.97667102675858	6.46871221727113e-07	5.59564e-06
LOC619207	11.9421807102855	0.985085	0.19128097098547	5.14993581001434	2.60575623453339e-07	2.54546e-06
LOC641298	52.1706055920814	0.941937	0.190272686549637	4.95045583749691	7.4039857517991e-07	6.30162e-06
LOC642846	125.643939966644	0.751479	0.151879077216768	4.94787742342775	7.50271291777636e-07	6.37473e-06
LOC642852	462.875761495655	0.605586	0.114365059432019	5.29519843336061	1.18887239874226e-07	1.28335e-06
LOC643677	1.91707910171844	1.59022	0.304901855597406	5.21551733253244	1.83304918018414e-07	1.86986e-06
LOC650623	40.6423506899992	0.979129	0.147137707076151	6.6545104220427	2.84244614051405e-11	1.04324e-09
LOC728875	144.207654076087	-0.6738	0.118485069997496	-5.68679470567014	1.29445910396333e-08	1.9066e-07
LOC728989	8.53774855844741	0.771363	0.162712867635724	4.74064111581818	2.13043007994445e-06	1.58386e-05
LOC729156	12.8791087471113	-1.39419	0.215483339265362	-6.47007055254389	9.79571691032001e-11	2.96078e-09
LOC729603	16.5267726566664	1.23501	0.192808397875652	6.40538828288474	1.49987177432873e-10	4.18197e-09
LOC84740	5.95248040102446	0.679772	0.154914619184359	4.38804068992293	1.143763805813e-05	6.84507e-05
LOC90834	16.4117492831019	1.07315	0.188851519666725	5.68252558614748	1.32720050257345e-08	1.95003e-07
LOC91316	288.611572699364	0.594742	0.133444455556021	4.45685261071304	8.3171744653918e-06	5.19181e-05
LOH12CR2	129.28745533458	-0.737221	0.127142182270717	-5.7984007637115	6.6950301771691e-09	1.07146e-07
LPAR2	163.548013136957	0.619193	0.138002168165726	4.48683809257946	7.22879658177167e-06	4.61166e-05
LPAR6	766.700716851422	-0.668291	0.104198901373777	-6.41360645135132	1.42116797043256e-10	4.006e-09
LPHN3	1319.14528281091	0.621051	0.129985894262511	4.7778349232325	1.77192753246278e-06	1.35314e-05
LRIT2	3.29750201567481	1.37931	0.294107423387607	4.68982468580629	2.73439225397667e-06	1.97016e-05
LRRC10	1.34907782756592	1.94699	0.453170971256466	4.29636295138257	1.73623224740002e-05	9.86865e-05
LRRC16B	123.260895466064	0.875386	0.192710264622602	4.54249627296733	5.5591979722593e-06	3.66887e-05
LRRC34	254.909390082771	-0.661496	0.137480111472	-4.81157438796099	1.49745978770217e-06	1.16834e-05
LRRC37A4	63.6040714252913	0.779721	0.136291855422371	5.72096398486817	1.05921350506579e-08	1.60344e-07
LRRC4	538.199326884732	0.772686	0.145528331297225	5.30952543895532	1.09911042789148e-07	1.20234e-06
LRRC67	10.254301992378	-1.02143	0.23431232450885	-4.35924790599672	1.30510200833542e-05	7.69792e-05
LRRC8B	639.967529502978	0.592238	0.103208748922648	5.73825629650502	9.56562829830189e-09	1.46907e-07
LRRIQ1	17.3717161361979	-1.88482	0.398400963627178	-4.73095009760921	2.23471455877439e-06	1.65115e-05
LRRN1	1682.59145119461	0.648393	0.145528302855332	4.45544509736026	8.37193194784117e-06	5.21694e-05
LRRN4	1.42418979668666	1.65995	0.363798305049768	4.56282796629031	5.04691677997246e-06	3.37263e-05
LRRN4CL	273.867141226311	-0.9534	0.185687729047458	-5.13442857889228	2.83002536006307e-07	2.72021e-06
LRRTM1	106.362402681616	0.983963	0.210993782505718	4.66347071642972	3.10920446800225e-06	2.2075e-05
LSAMP	1371.85001889456	0.693627	0.128742744792935	5.38770118706552	7.13645710072395e-08	8.39386e-07
LSMD1	1057.61262212663	-0.858545	0.10935491556924	-7.85099499284009	4.12749442172997e-15	7.57437e-13
LST1	352.397477136171	-1.03194	0.14696738536816	-7.02154013792797	2.19435756083187e-12	1.28965e-10
LTB4R2	37.0166058187125	0.630578	0.125460097903793	5.02612166939556	5.00498415928068e-07	4.45813e-06
LY86	560.023030718989	-0.916965	0.151205813292856	-6.06435126474305	1.32487317919439e-09	2.66218e-08
LY96	244.170299196766	-1.06967	0.174896053817005	-6.1160484927594	9.592414639647e-10	2.02477e-08
LYPD1	3176.73760544184	-0.685386	0.149894836585905	-4.57244273807506	4.82070989473982e-06	3.24338e-05
LYPLA1	1593.29514724134	-0.769238	0.0976523782955777	-7.87731296056526	3.34496357513034e-15	6.39956e-13
LYRM1	665.648796778186	-0.768142	0.0973061445437131	-7.89407888027088	2.92467157766213e-15	5.7171e-13
LYRM5	799.599190751933	-0.778649	0.101532431129717	-7.66896832824702	1.73385239015552e-14	2.4189e-12
LYSMD2	309.809013957278	-0.618393	0.0927494947495111	-6.66734572693075	2.60471021384213e-11	9.71849e-10
MAGI1	733.158516582346	0.697834	0.126104382486208	5.53377744190293	3.13406605473859e-08	4.09913e-07
MAGT1	2658.92175321075	-0.605761	0.0835361352524828	-7.25148615660751	4.12223164771181e-13	3.20927e-11
MAML2	678.649411155699	0.652671	0.104650122165991	6.23669145518379	4.4692225119943e-10	1.05065e-08
MAMLD1	638.344687491181	0.587372	0.10996797646538	5.34130192606786	9.22814100533559e-08	1.04508e-06
MAP1LC3A	869.913324368294	-0.58862	0.107901977669646	-5.45513577151544	4.89354402751613e-08	6.03604e-07
MAP3K9	28.1824481135452	1.13784	0.208899268727211	5.4468408112171	5.12723115759762e-08	6.2684e-07
MAP4K5	721.737256964315	0.61755	0.0850663261129718	7.25962912590907	3.88153098869739e-13	3.05503e-11
MAPK8IP3	1843.87861214516	0.606325	0.117898591883925	5.14276460502912	2.70724746304541e-07	2.62748e-06
MAPT	3627.4313409484	0.70561	0.143693825173113	4.91051177556222	9.08390006563387e-07	7.5527e-06
MARCH8	166.708557570474	0.781715	0.118862652723429	6.57662435356803	4.81248536813347e-11	1.62684e-09
MASP2	38.9969356638629	0.657863	0.137177804646095	4.79569860466451	1.62108865924105e-06	1.24695e-05
MAST1	406.708629963668	0.977259	0.186335003373771	5.24463496473333	1.56592043944573e-07	1.63814e-06
MB	14.3956730654213	-1.14362	0.257767373489533	-4.43662131857543	9.13818427122563e-06	5.64746e-05
MCF2L	908.634703857879	0.59423	0.132112355796412	4.49791124628079	6.86243319247071e-06	4.41711e-05
MDC1	978.586922438621	0.667869	0.0806949624608386	8.27646437945744	1.26886442831324e-16	4.14896e-14
MDH1B	119.368796258893	-0.885456	0.161004828186365	-5.4995641154161	3.80731250075325e-08	4.86298e-07
MDN1	471.001218621672	0.771045	0.111530312989042	6.91332674086249	4.73417803581783e-12	2.35192e-10
MDP1	265.22491293236	-0.65358	0.0960871566822783	-6.80195480952599	1.03208977431504e-11	4.59433e-10
MED13L	1264.66810974759	0.706143	0.0928448711594478	7.60562447749421	2.83531455398234e-14	3.56587e-12
MED31	338.506160884248	-0.952246	0.108565168365743	-8.77119408984128	1.76781418158956e-18	2.44557e-15
MEGF11	356.068913960335	0.942909	0.197682974802087	4.76980622760544	1.84403216985656e-06	1.40165e-05
MEGF6	149.884422551456	1.30548	0.246999600287241	5.28533287618069	1.25476380366868e-07	1.3416e-06
MEX3A	894.402654255038	0.871679	0.173796592066216	5.01551007589358	5.28929524082067e-07	4.67893e-06
MEX3B	157.764944114277	0.948375	0.196952956033481	4.8152336515034	1.47027753314226e-06	1.14913e-05
MFAP4	1180.83440350065	-0.977238	0.199704185956968	-4.893430202545	9.9093468115182e-07	8.1263e-06
MGC16384	5.03679277562199	1.13581	0.179813233072771	6.31660383037561	2.67373833059287e-10	6.8012e-09
MGC2889	23.8394634819642	1.35003	0.266248755994719	5.07054739251748	3.96673117841138e-07	3.64899e-06
MGMT	184.118189338254	-0.672443	0.150481810230062	-4.46859809521337	7.87339043979722e-06	4.95261e-05
MGP	3044.75880286281	-1.42368	0.218790099134146	-6.50706507799535	7.66332197518798e-11	2.41785e-09
MGST2	458.893476159094	-0.720665	0.0964698757846423	-7.47036367283005	7.99734861534987e-14	8.41078e-12
MGST3	1854.96540727592	-0.679995	0.089627961352679	-7.58686681005413	3.27733659354436e-14	3.97074e-12
MICAL3	1249.31196587592	0.843718	0.106206817812236	7.94410820289179	1.95592807366375e-15	4.09016e-13
MIR155HG	43.0539733256355	-0.830419	0.184725621909046	-4.49542114822639	6.94323851329687e-06	4.45989e-05
MKI67	1005.29723449203	1.1666	0.160379609934177	7.27396939860218	3.49075096352609e-13	2.82782e-11
MLF1	809.5388979416	-0.745241	0.136392238235241	-5.46395195308462	4.65649619727708e-08	5.78731e-07
MLL	1226.79389543237	0.716986	0.100470921600024	7.13625283064722	9.59095285216837e-13	6.36471e-11
MLL2	1149.83264531037	0.665558	0.110598530969567	6.01778076333226	1.76824451234624e-09	3.40108e-08
MLXIP	544.055935975442	0.595618	0.100900981995426	5.90299582794088	3.56959304834841e-09	6.17859e-08
MN1	209.186961831111	0.865952	0.189602607909467	4.56719575487516	4.94292361575963e-06	3.31569e-05
MORN2	555.502604481756	-0.734771	0.102272184848174	-7.18446720250772	6.7469775317365e-13	4.77707e-11
MORN5	62.1165711288644	-1.28423	0.272523716576843	-4.71236189955228	2.44862018675516e-06	1.78573e-05
MREG	768.077014249002	-0.824863	0.161330413101179	-5.1128786855455	3.17286076246186e-07	2.9996e-06
MRPL11	769.612015412943	-0.596946	0.0844076198699742	-7.07218581452034	1.5251200763444e-12	9.45785e-11
MRPL13	738.438945338457	-0.702982	0.0936366884606368	-7.50754734923648	6.02453973248058e-14	6.77158e-12
MRPL22	420.313270678518	-0.681215	0.0838927908447144	-8.12006405192886	4.65937708610312e-16	1.21441e-13
MRPL33	769.284293983021	-0.647359	0.0928281341068293	-6.97374229792623	3.08619185085906e-12	1.67175e-10
MRPL34	804.349069854891	-0.69435	0.0929391237373265	-7.47102189446556	7.95744120488345e-14	8.41078e-12
MRPL54	825.252987427344	-0.886042	0.115698671000075	-7.65818804914111	1.88574634430722e-14	2.5888e-12
MRPS12	742.771436378156	-0.583798	0.0972294997864447	-6.0043304025339	1.92123115572478e-09	3.65237e-08
MRPS15	965.673995116375	-0.743468	0.0939196822261952	-7.9159958157351	2.45281866363323e-15	4.90128e-13
MRPS23	1096.59291561327	-0.635048	0.0908759292925665	-6.98807958991592	2.78674296849242e-12	1.54681e-10
MRPS28	661.975606581165	-0.63009	0.0938228486714475	-6.71574420415792	1.87108778478512e-11	7.44461e-10
MRPS33	961.171685988444	-0.673496	0.0938522902918535	-7.17612625600055	7.17143319065236e-13	5.03793e-11
MRPS36	339.946610317915	-0.599221	0.0824515856288821	-7.26754631452795	3.66075845302363e-13	2.91314e-11
MS4A6A	1851.31495491607	-0.918879	0.167677810007936	-5.48002748202229	4.2525977611545e-08	5.32582e-07
MSH5	289.986519596056	0.742934	0.148659287222878	4.99756115784942	5.80599279885379e-07	5.07855e-06
MSMP	156.628513996976	-1.63648	0.209520301113853	-7.8106266371124	5.6904351337531e-15	9.88163e-13
MST1R	5.88996285593884	1.1099	0.223549875967518	4.96487121567864	6.87466732838907e-07	5.91833e-06
MT3	16292.4993687593	-0.882412	0.200454871393752	-4.40204985434681	1.07232907825573e-05	6.48664e-05
MTHFS	292.986684326607	-0.639569	0.096298191353798	-6.64155088917996	3.10399543685823e-11	1.11868e-09
MTSS1	1528.92831773753	0.635835	0.129744020264712	4.9006898846669	9.55007031724776e-07	7.86754e-06
MTSS1L	7094.75675146013	0.691665	0.115314118783739	5.99809609057559	1.99644378759658e-09	3.77143e-08
MUC12	26.6794126752811	-1.10185	0.244486763734666	-4.50677151121096	6.58214454364977e-06	4.25956e-05
MURC	19.6870565819968	0.85604	0.166032849687846	5.15584769737396	2.52486059469503e-07	2.4745e-06
MYB	25.1748262079011	1.14969	0.237365495972092	4.84356232539686	1.27531692233108e-06	1.01709e-05
MYCBP	404.429550508981	-0.599851	0.0787465888229614	-7.61748644636356	2.58663059740967e-14	3.34662e-12
MYCL1	195.320715419074	0.72579	0.1634930374464	4.43926947304786	9.0264740763774e-06	5.58995e-05
MYCN	256.468515224253	0.991811	0.2066189483094	4.80019342867139	1.58512455751132e-06	1.22295e-05
MYEOV2	1503.39337420879	-1.04574	0.121680538043493	-8.59416983335838	8.38689060663506e-18	6.8559e-15
MYL12B	3918.20054133063	-0.651117	0.0875989775458632	-7.43293374649453	1.06215109796479e-13	1.08501e-11
MYL6	18480.3593687104	-0.745017	0.101465291395822	-7.34258338164603	2.09509915847186e-13	1.86526e-11
MYO5A	1427.49034726766	0.629665	0.106397522938771	5.91804449962729	3.25791832655658e-09	5.72731e-08
MYST4	506.657140919278	0.784277	0.0930951363995399	8.42446464947751	3.62403394707135e-17	1.87528e-14
MYT1	363.029280259232	1.48814	0.300345599448354	4.95474508601522	7.24251755258179e-07	6.18762e-06
N6AMT2	215.729977361217	-0.744507	0.105810136123935	-7.03625703307739	1.97472520161027e-12	1.18774e-10
NAA20	1271.77726728408	-0.749488	0.065221039217524	-11.4915078127295	1.45549038925334e-30	1.30878e-26
NAT1	64.9704840651553	-0.67342	0.130733078469629	-5.15110657240904	2.58953977670794e-07	2.53237e-06
NAV1	2312.02468131546	0.796234	0.113053961595195	7.04295434373302	1.88205912702823e-12	1.14735e-10
NBEA	369.409132850183	0.608178	0.13028877199974	4.66792688930389	3.04254120461725e-06	2.17131e-05
NBEAL1	25.1714043307439	0.694875	0.139583450999905	4.97820343785733	6.41771820087228e-07	5.56001e-06
NCAM1	7737.29071564972	0.793166	0.118100841001198	6.71600996168938	1.8676803103507e-11	7.44461e-10
NCF4	265.772369073916	-0.64779	0.140007987983863	-4.62680795222462	3.71344554303265e-06	2.57848e-05
NCKAP5	187.843290041623	0.628853	0.115896251131248	5.42599546956794	5.76324206974439e-08	6.96547e-07
NCOA2	296.58800359302	0.668302	0.124280997585151	5.37734438181669	7.55924999778816e-08	8.78201e-07
NCRNA00116	375.144019351346	-0.756285	0.116155817527857	-6.51095378741259	7.46751170703968e-11	2.36436e-09
NCRNA00120	28.9775335145085	0.616028	0.130396791116676	4.72426075154062	2.30953930097843e-06	1.69807e-05
NCRNA00152	463.365122473818	-0.932113	0.160596764864162	-5.8040576989999	6.47289857610294e-09	1.04402e-07
NCRNA00188	6724.20808260006	-0.640928	0.127738165868641	-5.01751678690438	5.23436291884164e-07	4.63947e-06
NCRNA00201	529.815775849727	0.584957	0.134331537654858	4.35457392666309	1.3332598231446e-05	7.82167e-05
NDP	1184.62878106577	-0.844219	0.151893946609042	-5.55794865421341	2.72963651668752e-08	3.65523e-07
NDUFA1	1720.76232098658	-0.689108	0.0831425644147634	-8.28826588089424	1.14911480757971e-16	4.05209e-14
NDUFA11	2407.69602954778	-0.717303	0.11528927914797	-6.2217653012561	4.91592033325918e-10	1.14222e-08
NDUFA13	4186.17082552928	-0.674729	0.103949472696564	-6.49093302540608	8.53063987509428e-11	2.65424e-09
NDUFA2	1448.85765382294	-0.872671	0.105228556434928	-8.29310454085706	1.10330292995324e-16	3.96836e-14
NDUFA3	1267.30622749637	-0.651176	0.099377152463992	-6.55256849445473	5.65557635211862e-11	1.85602e-09
NDUFA4	6414.18468407718	-1.03072	0.122360667111781	-8.4236406826253	3.64962391941569e-17	1.87528e-14
NDUFA7	1013.61833389309	-0.612194	0.0886249201394054	-6.90769880409555	4.92578399770872e-12	2.41779e-10
NDUFAB1	1195.63666762241	-0.58737	0.0870485614138773	-6.74761037383544	1.50299896882417e-11	6.3302e-10
NDUFB1	1039.74657821075	-0.827687	0.102837789712839	-8.04847377043756	8.38328706877047e-16	1.90842e-13
NDUFB2	2393.24343333843	-0.584494	0.0838262049800774	-6.97269118978524	3.1093466266597e-12	1.67421e-10
NDUFB3	924.369379015297	-0.719883	0.0856881309756038	-8.40119633127489	4.41952772658647e-17	2.2078e-14
NDUFB5	2135.6530334776	-0.851776	0.100166708699662	-8.50358047856071	1.83830992692543e-17	1.22445e-14
NDUFB6	1137.181223972	-0.61527	0.0972714055221554	-6.32529393106004	2.52751000179755e-10	6.47503e-09
NDUFB7	2357.74530698961	-0.698854	0.114364840201809	-6.11073797546761	9.91714758882333e-10	2.09086e-08
NDUFB9	2806.02996237597	-0.623746	0.0998679156478597	-6.24571313353371	4.21870830628125e-10	1.00091e-08
NDUFC1	865.392859225454	-0.633984	0.076685127079266	-8.26736847403641	1.36948193146602e-16	4.39799e-14
NDUFV2	1122.96904669566	-0.603314	0.0837733374459586	-7.20173963534176	5.94491316253989e-13	4.29371e-11
NENF	1811.17957850529	-0.617482	0.0965428812779899	-6.39593730424091	1.59565470775183e-10	4.39108e-09
NET1	426.071765279103	0.715975	0.145322161286276	4.92680906113417	8.35833600729283e-07	7.01429e-06
NEU4	486.560442961611	1.04522	0.241876724247379	4.32130213494381	1.55111108485192e-05	8.92646e-05
NEURL1B	989.528509333881	0.797353	0.118321250657284	6.73888273163135	1.59609150659104e-11	6.59865e-10
NFIX	7906.21826043577	0.603092	0.0974800014357138	6.18682811801918	6.13868347092132e-10	1.3817e-08
NFKBIL2	225.797272994512	0.748213	0.138973882782005	5.38384094061882	7.29129408235512e-08	8.53689e-07
NID1	2729.62514363531	0.621921	0.140608231100105	4.42307392527602	9.7306427501912e-06	5.96035e-05
NIN	929.116931541088	0.585957	0.0904939690996146	6.47508986506242	9.47555293291816e-11	2.88502e-09
NIPSNAP3A	635.752766508823	-0.610126	0.107745793257442	-5.66263891770312	1.49062612361332e-08	2.15667e-07
NIT2	578.288816479932	-0.620308	0.0856479855644397	-7.24252438761136	4.40409212456776e-13	3.39752e-11
NKD1	153.594613056349	0.758503	0.168487772002498	4.50182827894378	6.73714057213526e-06	4.34891e-05
NKPD1	12.2715697329794	0.932672	0.186331474957743	5.00544626162724	5.5732760104918e-07	4.89642e-06
NLGN2	2617.90269358291	0.58744	0.0977381113948051	6.01034267068987	1.85131594213143e-09	3.5344e-08
NME1	3413.00931322482	-0.598521	0.110497807474822	-5.41658470339372	6.07482185030979e-08	7.31745e-07
NME2	5751.31082680115	-0.611719	0.0893639040536968	-6.84525607655437	7.63391907437123e-12	3.5475e-10
NME5	183.616238214533	-0.972073	0.151027816302517	-6.43638224852818	1.22354672937597e-10	3.57212e-09
NOP10	1437.19655053102	-0.684304	0.0888291380693001	-7.70359644494163	1.32289177358375e-14	1.95007e-12
NOS1	17.9179210724314	2.13436	0.401043678619491	5.32202140234516	1.02620495086617e-07	1.14062e-06
NOTCH1	3209.06545361927	0.773323	0.115467428078695	6.69732784496411	2.12265059370126e-11	8.24487e-10
NPC2	4963.59656176211	-0.776493	0.129095305188374	-6.01488163189782	1.80018190341829e-09	3.44776e-08
NQO1	780.881687256015	-0.616848	0.130684032553478	-4.72014568139567	2.35675793034923e-06	1.72855e-05
NR6A1	5.27462933185606	1.11833	0.22378192288099	4.99739060468189	5.81112848541955e-07	5.08057e-06
NRXN2	2440.35125012426	0.718969	0.148692359248559	4.83527863294351	1.32959263447509e-06	1.05522e-05
NUDT16P1	31.2304186767637	-0.641281	0.13623266036514	-4.70724611963989	2.51085691194529e-06	1.82667e-05
NUMA1	4432.87644390259	0.651883	0.089703826125073	7.26705846686454	3.67399817119553e-13	2.91314e-11
NXT1	620.164189339958	-0.673265	0.0962389700795011	-6.99576487137966	2.6381566036241e-12	1.48729e-10
OBSCN	83.6906237657125	0.86328	0.200661639440354	4.30216928827762	1.69134005115072e-05	9.64396e-05
OPCML	555.557337061869	1.062	0.243385566413166	4.36344459503696	1.28030376867329e-05	7.56608e-05
ORMDL2	460.231677466154	-0.596766	0.08411961000859	-7.09425746624617	1.30047823903574e-12	8.19231e-11
OST4	2864.51440591913	-0.735729	0.0872354074026943	-8.43384028779014	3.34503143981264e-17	1.87528e-14
OSTC	1454.46508126862	-0.783811	0.0964128919566945	-8.12973727679322	4.30221848614274e-16	1.13781e-13
OTOS	83.1853616182106	-2.00785	0.344038650940979	-5.83610601198591	5.34349044926877e-09	8.78638e-08
OTUD7A	31.7225657969637	1.02606	0.175532219141213	5.84541748414382	5.05299369062873e-09	8.39716e-08
OVCA2	707.680979014316	-0.625098	0.0845940895577208	-7.38937988856574	1.47515152363541e-13	1.4263e-11
P2RX7	341.977270963077	0.987476	0.146987878390311	6.71807959301775	1.84135113211042e-11	7.39171e-10
PAR5	18.3229167655381	1.08598	0.200308600014175	5.42153211031986	5.90903798920341e-08	7.12731e-07
PAX1	7.78058902338673	3.83615	0.643629679953936	5.96018157810263	2.51957808902475e-09	4.61451e-08
PCDH11X	73.5471851214771	1.83974	0.367945047446677	5.00005119897905	5.7315092620016e-07	5.01584e-06
PCDH15	206.47274722169	1.91022	0.339731317484911	5.62274985229777	1.87941453949277e-08	2.63646e-07
PCDHB15	96.3947325502802	0.906407	0.209267196376857	4.33133643903937	1.48207020541375e-05	8.57911e-05
PCDHB18	11.8106544397694	0.916165	0.208174487827373	4.40094964656499	1.0777813593302e-05	6.51523e-05
PCDHGA11	25.3254612876018	0.749991	0.168199389129336	4.45893766574519	8.23668684879374e-06	5.14872e-05
PCDHGB8P	2.32588016516434	1.27322	0.263048302052346	4.84025337565828	1.29673690953476e-06	1.0328e-05
PCDHGC4	810.094722953947	1.02598	0.207234101775726	4.9508374010326	7.38948246113315e-07	6.29226e-06
PDCD11	521.833381115912	0.603964	0.0837600702951518	7.21063929003532	5.56897971901842e-13	4.08786e-11
PDGFRA	7342.71305596214	2.35645	0.280714268945625	8.39448015930976	4.67960027863974e-17	2.27454e-14
PDRG1	886.540827684344	-0.644117	0.0809038221703317	-7.96150935709206	1.69953209246394e-15	3.60869e-13
PDZD11	1346.33905745332	-0.636526	0.0748210045328342	-8.50731857830387	1.78001947429224e-17	1.22445e-14
PDZD4	1663.76505310546	0.588622	0.127010531221222	4.63443796072098	3.57908547528171e-06	2.49409e-05
PDZD8	293.835396921918	0.588754	0.0972092913277278	6.05655706712565	1.39065819795062e-09	2.78194e-08
PDZK1IP1	41.2545692804557	-1.39913	0.287145487452009	-4.87255293327173	1.10165326123039e-06	8.95261e-06
PDZRN3	684.642175968696	0.636512	0.132419282762611	4.80679228957033	1.53371189606235e-06	1.19138e-05
PEX2	1433.28412153701	-0.675465	0.091088595258959	-7.41547339978729	1.2119112852561e-13	1.21083e-11
PFDN5	6676.86319441632	-0.869544	0.11289775428819	-7.70204496172491	1.33905750720414e-14	1.95785e-12
PGCP	819.044435019714	-0.635517	0.116383319992156	-5.46054635924065	4.74671516880664e-08	5.88318e-07
PHACTR1	119.167383274252	1.00753	0.14757804282982	6.82708952038821	8.66546269113652e-12	3.93535e-10
PHF11	439.452598848722	-0.689532	0.121094589471177	-5.69415769253413	1.23982456492665e-08	1.84273e-07
PHF21B	192.889673318158	0.674878	0.156848315787751	4.30274164820297	1.68697519349724e-05	9.62213e-05
PHPT1	2358.00961320833	-0.722119	0.10315236385807	-7.0005128569045	2.55027227764921e-12	1.4514e-10
PIH1D2	65.6344258404997	-0.77883	0.147280451124548	-5.28807727449157	1.23608761582431e-07	1.32698e-06
PIR	306.196763982233	-0.704316	0.159444232998379	-4.41731611271291	9.99340258754861e-06	6.09638e-05
PKD1	2284.92167868412	0.587203	0.12355455588733	4.75258467282725	2.00832620004533e-06	1.50805e-05
PKDREJ	8.48742444792108	0.660442	0.144443068344599	4.57233206028222	4.82325767854516e-06	3.24388e-05
PKIG	1745.11083362192	-0.763059	0.0952618400722795	-8.01012195858697	1.14594745915782e-15	2.54429e-13
PKMYT1	266.200465138823	0.742253	0.147926394334156	5.01771809244757	5.22888277941259e-07	4.63918e-06
PLCB4	99.7686237494452	0.93364	0.205095904611639	4.55221398935365	5.30843003963426e-06	3.51886e-05
PLCH2	108.180982889593	1.25111	0.263118516912371	4.75493516490533	1.9851011324467e-06	1.49435e-05
PLEKHG3	409.988624585318	0.77327	0.136436383655112	5.66762343618084	1.44791741882763e-08	2.10164e-07
PLTP	9154.56328618033	-0.795242	0.14521465753882	-5.47632223534266	4.342565930317e-08	5.42338e-07
PLXNA3	1429.35917219552	0.583303	0.0988696547063124	5.89971289199197	3.6413465144795e-09	6.2726e-08
PLXNB3	1418.1282635137	0.799967	0.127989106209613	6.25027217129985	4.09738025902089e-10	9.78583e-09
POLE	570.504155279445	0.71472	0.111971142909292	6.38307407331047	1.7356789522449e-10	4.6939e-09
POLQ	78.2428048054767	0.731713	0.146040499337729	5.01034498258524	5.43325489505934e-07	4.78979e-06
POLR2G	2341.45028018185	-0.613596	0.088416601326568	-6.93982597115141	3.92583257620509e-12	2.00006e-10
POLR2L	2057.10760046608	-0.726948	0.0981038660499171	-7.40998060713286	1.26317886954643e-13	1.24819e-11
POMC	19.2817204226761	-0.807536	0.159897937161086	-5.05031948913692	4.41071738245082e-07	4.00012e-06
POMP	2120.68985551521	-0.584227	0.0777343562821987	-7.51568128454295	5.66153249799873e-14	6.40358e-12
POU3F3	414.298541221399	0.625741	0.129138567753788	4.84549708400152	1.26295066912868e-06	1.00857e-05
PPCS	676.193856204025	-0.669327	0.0964657723832751	-6.9384872135732	3.96320855355684e-12	2.0134e-10
PPM1E	381.999801906992	0.612083	0.129961206868234	4.70973825312229	2.48035118261341e-06	1.8074e-05
PPM1L	88.8638902373318	0.683434	0.11936427995875	5.7256196683088	1.03056869939624e-08	1.56933e-07
PPM1N	16.6375676617518	-0.725334	0.162976329614237	-4.45054925600734	8.56509452901491e-06	5.32071e-05
PQLC3	358.773481267144	-0.722726	0.118611364793753	-6.09322658193362	1.10657260731869e-09	2.2927e-08
PRDX4	2739.47361599198	-0.672611	0.11511425631514	-5.84298935044758	5.12722965841123e-09	8.49062e-08
PRG4	22.0091536757216	-1.59079	0.36195282903318	-4.39502985596314	1.10757530018325e-05	6.66844e-05
PROCR	279.523285857554	-0.8585	0.128332801897706	-6.68964168109617	2.23717697100065e-11	8.56526e-10
PROM2	24.525709246015	0.888492	0.182571330271163	4.86654739150572	1.13564700889098e-06	9.19976e-06
PROX1	83.6364984600404	0.760091	0.176803670189538	4.29906555697597	1.71519737047319e-05	9.76761e-05
PRR11	107.169066563245	0.657014	0.118829154447867	5.52906043739435	3.2195042324724e-08	4.18583e-07
PSENEN	1067.41469084245	-0.594017	0.0770950967112914	-7.70499158836763	1.3085190996712e-14	1.94811e-12
PSMA7	4128.08049721342	-0.580415	0.0764323168442259	-7.5938438068108	3.10552706349356e-14	3.82533e-12
PSMB3	2407.68682222888	-0.623183	0.087564617875323	-7.11683689497317	1.1043203887901e-12	7.19569e-11
PSMB8	2025.08594988343	-0.581585	0.122653771930958	-4.7416792998984	2.11953955410859e-06	1.57772e-05
PSME1	2242.40471439418	-0.629817	0.0953112220805992	-6.60800600804257	3.8953088413539e-11	1.35499e-09
PTCH1	737.765275041015	1.19092	0.169581272683731	7.02271416576566	2.17599088176954e-12	1.28305e-10
PTPRD	968.779880152379	0.685414	0.142536829081152	4.80867734329575	1.51932206517086e-06	1.18266e-05
PTPRS	3739.39952154497	0.710691	0.109506414247323	6.48994534056191	8.58675213538516e-11	2.66249e-09
PTS	372.215950400951	-0.603773	0.0945879306876748	-6.38319133040483	1.73434987926964e-10	4.6939e-09
PTX3	933.287880395871	-1.23857	0.24074830987156	-5.14467144879424	2.6798940864142e-07	2.60797e-06
PVRL1	836.857069135541	0.769484	0.143412824512528	5.36551477511509	8.07186719361043e-08	9.29433e-07
PYCARD	333.137765095911	-0.64147	0.127566799061793	-5.02850051106411	4.94330196535458e-07	4.40974e-06
PYROXD1	271.597048813284	-0.68759	0.0828446723858275	-8.29974689749248	1.04333428818386e-16	3.82925e-14
RAB32	643.947962237683	-0.833926	0.137781256500565	-6.05253687197412	1.42582348525367e-09	2.83651e-08
RAB34	1370.70615906605	-0.754771	0.144912635277228	-5.20845757527698	1.90416876058937e-07	1.93145e-06
RAB3B	6.53761458598845	1.58325	0.260856873543403	6.06941391808017	1.28377880400604e-09	2.59994e-08
RAB3IP	1149.4823057365	0.756298	0.144091167124201	5.2487470566783	1.5313716816544e-07	1.60397e-06
RAB9B	34.4814666861839	0.659375	0.133527410583561	4.93812706843008	7.887644347325e-07	6.66908e-06
RAD54L	172.747676041896	0.617378	0.135324920967826	4.56218856029173	5.06231517147016e-06	3.38064e-05
RAD54L2	168.554435669825	0.894731	0.128770965245415	6.94823185110651	3.69892756544362e-12	1.91154e-10
RALGPS1	385.877046941041	0.584374	0.125010976188449	4.67457846748741	2.94558000040657e-06	2.10797e-05
RAMP1	2861.202694225	-0.65766	0.146372865414308	-4.49304618685173	7.0211549370634e-06	4.49994e-05
RANBP17	16.379570109557	1.9536	0.356258518032203	5.48366520673842	4.16602855669584e-08	5.23343e-07
RARRES1	137.198546005073	-1.2592	0.236598232881508	-5.32211470362186	1.02567861795715e-07	1.14062e-06
RARRES3	1447.95045160188	-1.09867	0.171252411366865	-6.41551027719769	1.40351945619005e-10	3.98121e-09
RBKS	73.821517911748	-0.702684	0.103889252163882	-6.7637812761117	1.34435992951837e-11	5.75642e-10
RBP3	3.93928476710354	2.25097	0.490588482937039	4.58829646022585	4.46877721416166e-06	3.04419e-05
RBX1	1418.57486044789	-0.661235	0.110610084972576	-5.9780751488282	2.25789578320331e-09	4.19917e-08
RCOR2	461.151434272282	0.971436	0.202081312307057	4.80715531079179	1.53093057286763e-06	1.18981e-05
REC8	524.336981070555	0.954167	0.188505009896152	5.06175854863057	4.15406907130135e-07	3.80187e-06
RECQL4	350.818955896557	0.612622	0.134776527354998	4.54546630592117	5.48137656929875e-06	3.62283e-05
REM1	20.6312479719823	1.35517	0.268413612334952	5.04881153294341	4.4456704388006e-07	4.02573e-06
REV3L	951.789958716825	0.711548	0.120679098434956	5.89619962311267	3.71968936866148e-09	6.3892e-08
RFESD	37.0810976583303	-0.653141	0.0982387915434251	-6.64850818091898	2.96078527316465e-11	1.08006e-09
RGP1	98.6997353129449	0.59875	0.112350970233506	5.32928589807859	9.85996791375939e-08	1.10412e-06
RGS10	672.308440451759	-0.671868	0.130194618185551	-5.16049342656186	2.46299811227799e-07	2.41915e-06
RGS18	107.177717645907	-0.76341	0.173487802137203	-4.40036837904631	1.08067261332001e-05	6.52659e-05
RGS2	1618.79589666091	-0.928135	0.193767042134065	-4.78995382053117	1.66819700612792e-06	1.27935e-05
RGS8	4.10224472021275	1.9151	0.343720909758855	5.57167382156319	2.52303462375795e-08	3.4116e-07
RHBDL3	450.789674017905	0.936916	0.151349646235207	6.19041012861668	6.00078737777924e-10	1.35405e-08
RIBC1	99.8722849864642	-0.930605	0.213841159217678	-4.35185189584776	1.34992442055636e-05	7.91299e-05
RILP	144.492735663848	-0.831053	0.109089228334043	-7.61809953699952	2.57437756668092e-14	3.34662e-12
RNASE2	166.69735591938	-0.940469	0.205939812048423	-4.56671603817196	4.95424413300006e-06	3.3208e-05
RNASE3	25.1615720559447	-1.0453	0.236793832910734	-4.41438929041057	1.01295537236402e-05	6.16884e-05
RNF144A	894.679783587974	0.646674	0.142226708723673	4.54678195227798	5.44723804825381e-06	3.60291e-05
RNF150	64.9630018399879	0.82186	0.15521866265361	5.29485368177749	1.19111743750386e-07	1.28501e-06
RNF165	154.393887693495	1.25844	0.223357105365684	5.63419361414661	1.75879340276139e-08	2.49449e-07
RNF168	103.969684915965	0.656843	0.104605154599102	6.27925831785624	3.40191966142276e-10	8.31252e-09
RNF181	1271.33840466477	-0.603381	0.083605989917265	-7.21695701178643	5.31637736842806e-13	3.9215e-11
RNF212	9.03825546499445	-1.77462	0.391370115752971	-4.53436687943665	5.77765272389197e-06	3.79771e-05
RNF39	21.4108367344317	0.657142	0.138016750306896	4.76132412790486	1.9232686325859e-06	1.45573e-05
ROMO1	1613.9777524039	-0.920221	0.110260557213878	-8.34587994836217	7.06855836585696e-17	3.02669e-14
ROPN1L	37.214631300115	-1.56404	0.329945899087896	-4.74028448158066	2.13418355082102e-06	1.586e-05
RPL13A	4420.94447966547	-0.678576	0.106435864405489	-6.37544096712734	1.82437253605615e-10	4.88964e-09
RPL18A	826.596934514126	-0.590734	0.124278305286114	-4.75331207474577	2.00111103945055e-06	1.50389e-05
RPL21P44	5.06578793706416	1.10295	0.245360874275203	4.49522373081898	6.94968362743913e-06	4.46209e-05
RPL22L1	567.729636999675	-1.21033	0.154250770342245	-7.84650243464969	4.27800450990353e-15	7.61739e-13
RPL23AP64	4.05027114710746	0.944095	0.211690411501617	4.45979324207767	8.20387565630734e-06	5.13356e-05
RPL24	5250.06658046776	-0.652579	0.114078643428172	-5.72043453635146	1.06251960887128e-08	1.60613e-07
RPL26L1	297.819846224213	-0.592299	0.084038574143163	-7.04794200043772	1.81583291039154e-12	1.11075e-10
RPL27	11067.3091719692	-0.726724	0.115534401691328	-6.29011226354694	3.17236467112592e-10	7.83707e-09
RPL27A	6937.32028944622	-0.72717	0.10369960682341	-7.01227032411398	2.34481590273577e-12	1.3603e-10
RPL34	4216.56484241068	-0.612284	0.0996401605700196	-6.14494705229371	7.99901929124402e-10	1.73742e-08
RPL35	6359.38880308241	-0.695837	0.11965811493297	-5.81520700732275	6.05588968756225e-09	9.82934e-08
RPL36	6965.97926139584	-0.587635	0.106929997698227	-5.49550707944885	3.89589313510691e-08	4.955e-07
RPL39	376.12771959122	-0.901949	0.13443661554503	-6.70910507774881	1.95821625444336e-11	7.70603e-10
RPL41	19897.7323601082	-0.655368	0.0981336380745104	-6.67832024102245	2.41696444416949e-11	9.13166e-10
RPL9	390.533928310255	-0.820733	0.174011981435675	-4.7165320419533	2.39898600972443e-06	1.75451e-05
RPPH1	136.813255289233	-1.07596	0.244312165184842	-4.40403651690541	1.06255045587366e-05	6.43398e-05
RPS10	4550.80523219425	-0.635574	0.117509720785322	-5.4086964725912	6.34851170921744e-08	7.59625e-07
RPS11	18498.5130622326	-0.615789	0.110547033857664	-5.57038096672308	2.54182925388618e-08	3.43443e-07
RPS13	5538.81443498612	-0.640542	0.0932204793071029	-6.87125369965489	6.36400962576994e-12	3.0198e-10
RPS14	13641.5532146739	-0.760698	0.105539439550929	-7.2077162844586	5.68980230187138e-13	4.15957e-11
RPS15A	7993.59535995121	-0.618257	0.109464755868531	-5.64799852502069	1.62326569841894e-08	2.32983e-07
RPS18	8905.45557921027	-0.734691	0.134040359090741	-5.48111868041875	4.2264483487207e-08	5.30045e-07
RPS19	13730.5507446117	-0.626007	0.107318038962254	-5.83319257417419	5.43767477239537e-09	8.91442e-08
RPS21	6212.69229099808	-0.808586	0.11707415724994	-6.90661442170283	4.96356613437092e-12	2.42567e-10
RPS27L	1126.60374059802	-0.767732	0.109805785750117	-6.99172329895148	2.71530015878371e-12	1.51652e-10
RPS29	4637.39135892601	-0.599137	0.121001579808464	-4.95147910554443	7.36515287042766e-07	6.27451e-06
RPS3	14722.3712231586	-0.584316	0.114421457189133	-5.10669518461042	3.27841950996994e-07	3.08865e-06
RPS3A	5420.33350178366	-0.787492	0.128005407259635	-6.15202448292404	7.6500064527676e-10	1.67166e-08
RPS5	14033.6251150848	-0.765468	0.131531469923977	-5.81966042023941	5.89673050224733e-09	9.597e-08
RPS6	17792.5928501726	-0.64508	0.115325944796655	-5.5935373134537	2.22489382216185e-08	3.07788e-07
RPS7	2366.17147011487	-0.697961	0.118237906330376	-5.90302279067332	3.56900947469843e-09	6.17859e-08
RPS9	11116.9633486902	-0.644504	0.0983535746767498	-6.55292620796557	5.64204007727228e-11	1.85496e-09
RRAS	628.994321037343	-0.695391	0.122663656671949	-5.66908463915063	1.43562437621662e-08	2.08717e-07
RSL24D1	2193.39775731133	-0.601042	0.0984335912697184	-6.106067729569	1.02115688487965e-09	2.14038e-08
RTDR1	24.3043652387036	-0.878256	0.181060364726224	-4.85062678725026	1.23071932420502e-06	9.8721e-06
RTKN2	144.304978148485	1.05597	0.170153756989296	6.20594806999924	5.43681304861232e-10	1.24238e-08
RUNDC2A	34.5438682887696	0.654647	0.138271913172244	4.73448959052231	2.19607041337533e-06	1.62468e-05
RYR1	241.893387546247	0.821618	0.167826943378835	4.89562371631058	9.79944179137753e-07	8.04532e-06
S100A10	4901.82003593254	-0.799949	0.173733417661712	-4.6044611590143	4.13535185930642e-06	2.83423e-05
S100A11	3417.73743463538	-0.754241	0.141484310021102	-5.33091479048502	9.77192645197847e-08	1.09631e-06
S100A13	1952.5953814285	-0.925675	0.160039116328394	-5.78405324177609	7.29218456897452e-09	1.15544e-07
S100A4	770.019531220104	-1.1065	0.186081625974868	-5.9463359254365	2.74211121759701e-09	4.95122e-08
S100A6	11349.5221068793	-0.834349	0.145503994897506	-5.73420028824092	9.79735024475459e-09	1.49954e-07
S100A8	462.646970909724	-1.09573	0.253204109953781	-4.3274733755989	1.50829570556853e-05	8.71912e-05
S100B	14747.8385864389	-0.977726	0.174837633137509	-5.59219540784434	2.24216268941298e-08	3.09701e-07
SALL3	398.263327225239	1.2018	0.1762310352121	6.8194634323416	9.13811697757519e-12	4.11879e-10
SAR1B	865.864472007609	-0.701378	0.0888928615064864	-7.8901453012591	3.01834903979761e-15	5.83677e-13
SAT1	7560.98556849085	-0.608185	0.1293667418506	-4.70124855576073	2.58575532731984e-06	1.87509e-05
SATB1	710.91687206842	0.691702	0.131300642092523	5.26807881101552	1.37858923285138e-07	1.45496e-06
SBF1	2125.25951623343	0.753514	0.0960194004263709	7.84752274168796	4.2433548472321e-15	7.61739e-13
SBK1	738.174948168708	0.865462	0.180947613023429	4.7829412754945	1.72748606157901e-06	1.32144e-05
SCG5	1724.36609819993	-0.593531	0.132408870297019	-4.482561691144	7.37523120609413e-06	4.68679e-05
SCN3A	675.43602519529	0.891985	0.196900580179841	4.53012698158041	5.89482460208095e-06	3.86217e-05
SCN8A	94.1378897817586	0.75007	0.16077576400532	4.6653190376785	3.0813857203494e-06	2.19119e-05
SCOC	2206.04979043871	-0.587431	0.0839262216831671	-6.99937518789981	2.5710650538801e-12	1.45861e-10
SCUBE3	27.4620767177837	1.32717	0.262672786249191	5.05257488576363	4.35893365302949e-07	3.95715e-06
SDC2	2009.70281588707	-0.675746	0.153151770411074	-4.41226335046705	1.02295579161837e-05	6.21515e-05
SDCBP2	187.897293437197	-0.605045	0.133401691245731	-4.53550860465397	5.74648351936837e-06	3.78137e-05
SDHD	1608.45304519766	-0.604791	0.0736107716819134	-8.21606642662942	2.10287006993102e-16	6.303e-14
SEC11C	1775.18263919292	-0.710748	0.11749400131204	-6.04923129841501	1.45538583528265e-09	2.89212e-08
SELM	528.563295381812	-0.977431	0.171752022566502	-5.69094463845971	1.26338468427089e-08	1.86754e-07
SELT	3808.97640153631	-0.73786	0.0997536381597853	-7.39681930774125	1.39485145031282e-13	1.37077e-11
SEMA3D	65.3197393306028	1.47481	0.343234471226614	4.29679036588611	1.73288931712194e-05	9.85276e-05
SEMA5B	851.907516607073	0.757915	0.164288355325773	4.61332136390313	3.96284862701156e-06	2.72952e-05
SEMA6C	339.539601598767	0.646394	0.131416997338009	4.91864781177434	8.71440994906278e-07	7.28253e-06
SEP15	4611.08524595154	-0.806238	0.0985772305473201	-8.17874116967325	2.86824461944257e-16	8.1877e-14
SEPT3	2757.41590521472	0.70244	0.155854858730929	4.50701604400357	6.57456640480752e-06	4.25619e-05
SEPW1	5994.43961194834	-0.855942	0.118836251939075	-7.20270044435215	5.90315685863593e-13	4.28074e-11
SEPX1	727.92758499854	-0.636171	0.081460640180803	-7.80955567389909	5.73899437025205e-15	9.88163e-13
SERF2	8592.05735519802	-0.724428	0.0889222278009254	-8.14675708099886	3.7381355059469e-16	1.01859e-13
SERINC5	205.997241982922	1.25887	0.165007292713653	7.62917706069977	2.36256967535022e-14	3.14729e-12
SERTAD1	626.869337274328	-0.630853	0.118720045954649	-5.31378481468207	1.07371402912308e-07	1.1798e-06
SETD5	2622.29658895258	0.610118	0.0950532467020752	6.41870034059446	1.37442646968563e-10	3.92968e-09
SFMBT2	103.595027862307	0.678505	0.146929825756315	4.61788336038926	3.87674043237275e-06	2.67636e-05
SFRP1	227.51259831607	1.22516	0.28193770679002	4.34549504896905	1.38961906449089e-05	8.10604e-05
SGK196	21.1600597119441	0.80275	0.156149929329564	5.14089066922607	2.73439138689438e-07	2.64953e-06
SH3RF3	473.094635469356	0.648178	0.098905304056414	6.55351789100582	5.61971966798162e-11	1.85101e-09
SHISA7	278.10222668816	1.66587	0.267252332519786	6.2333180867582	4.56657585455965e-10	1.07073e-08
SHROOM4	317.984808961051	0.73805	0.119411725939101	6.18071818572982	6.38106377449073e-10	1.42439e-08
SKP1	8252.94274868309	-0.620773	0.0804475995549813	-7.71649101690825	1.19576000554004e-14	1.82242e-12
SLC16A4	609.395926626808	-0.654492	0.14361956480056	-4.55712472527185	5.18586321604152e-06	3.45034e-05
SLC1A1	412.385448064759	0.904493	0.196082028364614	4.61283140762981	3.97220486614474e-06	2.73492e-05
SLC26A1	30.8722243653027	0.626585	0.137587125204799	4.5540930116535	5.26120754800002e-06	3.49271e-05
SLC26A10	187.694876251051	1.13087	0.240867487779433	4.69499506255284	2.66613163843066e-06	1.92871e-05
SLC27A5	272.419206747866	-0.690009	0.112292494138235	-6.14475102755413	8.00890371706507e-10	1.73742e-08
SLC38A1	1418.20816775639	0.830565	0.172970941978915	4.80175789357636	1.57278781930872e-06	1.21594e-05
SLC45A2	2.32592047475999	1.17657	0.268895916452456	4.37555505038733	1.21123867271527e-05	7.2105e-05
SLC8A3	229.996012200392	1.38028	0.256134265738761	5.38890319283033	7.08889755757579e-08	8.34841e-07
SLITRK1	190.912666582219	1.77057	0.282056611282672	6.27736437558645	3.44360415277573e-10	8.3968e-09
SLMO2	1507.05052708272	-0.588918	0.0900568678371152	-6.53939772492179	6.17670641115978e-11	2.00871e-09
SLPI	534.127676656635	-1.47836	0.303433054720668	-4.8721003861793	1.10418036125569e-06	8.96505e-06
SMAD9	123.633820873548	0.721295	0.135863298257561	5.30897914463157	1.10240945395768e-07	1.20521e-06
SMARCA4	3173.8456225069	0.668523	0.0998537239166678	6.69501864786307	2.15644131430029e-11	8.3222e-10
SMOC1	2293.68621457168	1.37124	0.316166712288274	4.33708864283079	1.44382407051988e-05	8.39229e-05
SNHG9	115.363695617254	-0.637051	0.120426930571931	-5.28994015361603	1.22356389117666e-07	1.31606e-06
SNRPD2	3897.71916723261	-0.685964	0.102800556816857	-6.67276334310107	2.51031031490744e-11	9.42493e-10
SNRPE	708.580381189302	-0.772658	0.126787093441153	-6.09413806508903	1.10028669216856e-09	2.28758e-08
SNRPG	900.112148015446	-0.771249	0.106581176834676	-7.23625874499758	4.61230999327032e-13	3.49991e-11
SNX10	1552.85793002033	-0.918992	0.200142232694889	-4.59169273185626	4.3966535715272e-06	3.00074e-05
SNX30	585.176890299457	0.69062	0.103062693773326	6.70096965690197	2.07041034385895e-11	8.05936e-10
SOCS7	58.6819561703635	0.923955	0.158879727880414	5.81543420993784	6.04766956941443e-09	9.82934e-08
SOX10	1558.90079024631	1.51156	0.336026249975324	4.49832858859964	6.84897847933541e-06	4.41003e-05
SOX11	1405.65360004247	0.960103	0.198995637263887	4.82474258609999	1.40184200744745e-06	1.1038e-05
SOX5	168.067045758322	0.708634	0.148935173139041	4.75800306511908	1.95517530736812e-06	1.47491e-05
SOX6	1004.77468749974	0.981626	0.155850155172048	6.2985224632295	3.00496184003837e-10	7.53713e-09
SOX8	3905.1772461608	1.13852	0.201528012069977	5.64944152516546	1.60969928017882e-08	2.31221e-07
SPA17	243.208730585033	-0.737075	0.142753992177093	-5.16325559824077	2.42691390058516e-07	2.39023e-06
SPAG4	90.0159990822954	-0.932728	0.206065275969953	-4.52637125616586	6.0005126784868e-06	3.92412e-05
SPAG5	543.383475213428	0.622314	0.12687501917442	4.90493722551958	9.34572233374139e-07	7.72752e-06
SPATA17	59.4339302398505	-0.914803	0.200837930498614	-4.55493357421519	5.24021347365642e-06	3.48252e-05
SPATA4	11.334870608327	-1.05213	0.234705898786671	-4.4827519194291	7.3686574669824e-06	4.68592e-05
SPDYE5	5.00806560553256	0.867419	0.187365304163471	4.62955871909778	3.66445805668319e-06	2.54741e-05
SPEF1	123.416816465949	-1.31561	0.234636303378699	-5.60699705994975	2.05867156628528e-08	2.86779e-07
SPEN	1608.2730856998	0.775577	0.090224281934288	8.59609808308822	8.24723206609808e-18	6.8559e-15
SPHKAP	51.6113950853623	1.45429	0.295012892547417	4.92957391489017	8.24091523981227e-07	6.93193e-06
SPTBN2	610.357226672499	1.00146	0.174151639640172	5.75048303629588	8.8988832792536e-09	1.37489e-07
SREBF2	2712.81327287698	0.678245	0.0949240683809776	7.14513579283614	8.99069659476394e-13	6.05576e-11
SRGN	3213.5433953087	-0.855961	0.163068601783535	-5.24908565700135	1.52855992871868e-07	1.60196e-06
SRI	8166.55345772623	-0.65267	0.0945251117891888	-6.90473103652386	5.02986345792422e-12	2.45141e-10
SRRM2	7640.73320218951	0.633555	0.0963069670147919	6.57849228878914	4.75242514717465e-11	1.6126e-09
SRXN1	1208.09571043582	-0.589177	0.0846475490640317	-6.96035396181405	3.39418848633208e-12	1.80062e-10
STAG3L4	409.550525184047	-0.624254	0.129831877287877	-4.80817453843202	1.52314755414288e-06	1.18428e-05
STOX2	68.2053526663953	0.797129	0.149243880309401	5.34111766171037	9.23752724331845e-08	1.04527e-06
STRA13	776.254061955072	-0.601329	0.105088244167442	-5.72212923008547	1.0519723918923e-08	1.59382e-07
STRN	212.719741285357	0.599596	0.103747071355563	5.77940100873961	7.4967047754672e-09	1.1816e-07
SULT1A1	196.377083932414	-0.900115	0.189084264188289	-4.76039295678597	1.93216391206598e-06	1.46037e-05
SULT2B1	13.429523326359	-1.01309	0.221340142881448	-4.5770553411537	4.71566741462597e-06	3.18702e-05
SURF1	996.583982007817	-0.603643	0.0906697379274466	-6.65759684494321	2.78341000900511e-11	1.02786e-09
SUSD5	189.577384349249	1.32365	0.285510490991875	4.63608515207481	3.55069742474565e-06	2.47791e-05
SYN3	38.3325819423826	1.01826	0.204220662970717	4.9860883716672	6.16139710849939e-07	5.35297e-06
SYNE1	1220.58639486782	0.669711	0.112822198027171	5.93598186225214	2.92092093391317e-09	5.22685e-08
SYNE2	1026.50517640223	0.585127	0.103990607780163	5.62672874469659	1.83659189660509e-08	2.58647e-07
SYNPO2L	9.93430316654122	1.31513	0.212012528957439	6.20307590203169	5.53701173785682e-10	1.25729e-08
TANC2	1425.89889103212	0.701922	0.0978215358234511	7.17553300112676	7.20260203444063e-13	5.04014e-11
TAOK1	257.748678975347	0.735555	0.151689013343991	4.849095500497	1.24025703259009e-06	9.93089e-06
TBC1D16	406.367089560615	0.584414	0.10300150039761	5.67383727781832	1.39633775658802e-08	2.03995e-07
TCF20	509.934309930186	0.697719	0.0944166631012567	7.38978967375341	1.47061250230293e-13	1.4263e-11
TCTEX1D2	275.452452279474	-0.607785	0.106194430297167	-5.72332523370648	1.04459017872071e-08	1.58531e-07
TECTA	48.8222697391927	0.814701	0.13268709586426	6.14001774880723	8.25122610491081e-10	1.78353e-08
TET1	48.0200857778697	0.918741	0.150767809038397	6.09374855548908	1.10296861875313e-09	2.29051e-08
TET3	530.452044467259	0.771496	0.0931449392161077	8.28274815991694	1.20364789176311e-16	4.08423e-14
TFPI2	60.5888188148681	-1.56737	0.331584922738246	-4.72688950215439	2.27985245982117e-06	1.67899e-05
THSD4	154.892494749798	0.992338	0.202923576182562	4.89020484298459	1.00731096599269e-06	8.24931e-06
TIMM16	252.027089038606	-0.605383	0.114750458003093	-5.27565085023054	1.32285740939133e-07	1.39959e-06
TIMM8B	1194.41703531427	-0.692313	0.111267334808069	-6.2220677098614	4.90645192281367e-10	1.1415e-08
TLCD1	222.49056934741	-0.659502	0.149424501690003	-4.41361439932585	1.01658959646588e-05	6.18273e-05
TLR9	26.0141287692965	0.687172	0.126138504366699	5.44775539361972	5.10094416144956e-08	6.24475e-07
TMBIM4	1385.68253657675	-0.890828	0.0954612695519101	-9.33182428261112	1.0406409661816e-20	3.74298e-17
TMEM126B	925.986937202	-0.685162	0.0960055675830072	-7.13668784008352	9.56066268116082e-13	6.36471e-11
TMEM141	656.800094963958	-0.68622	0.10562378145763	-6.49683265312199	8.20286190418408e-11	2.57004e-09
TMEM14B	896.97135293112	-0.730342	0.103765300253707	-7.03840173025158	1.94457369130371e-12	1.17353e-10
TMEM14C	2296.79899041494	-0.708588	0.0940741977481368	-7.53222381017651	4.98833594003764e-14	5.82534e-12
TMEM17	144.026799143496	-0.640016	0.11162801777268	-5.7334668019761	9.83983329719383e-09	1.50348e-07
TMEM176A	1337.35112568767	-0.873627	0.184794118699458	-4.7275685534495	2.27224359595699e-06	1.67544e-05
TMEM176B	2652.8454973401	-0.87249	0.174240338344846	-5.00739621840566	5.51712815421238e-07	4.85421e-06
TMEM179B	1048.2615469832	-0.621597	0.0769591817801079	-8.0769656012224	6.63982665389504e-16	1.55079e-13
TMEM183A	1644.07768104342	-0.586891	0.112213958258334	-5.23011003377564	1.69409176139917e-07	1.74952e-06
TMEM216	300.360193312944	-0.647553	0.13479868411209	-4.80385416222197	1.55640211438429e-06	1.20492e-05
TMEM219	2072.82850425823	-0.59954	0.0812875128945452	-7.37554479033975	1.63674360165201e-13	1.5657e-11
TMEM223	332.944335322371	-0.685589	0.0861177135043793	-7.96106717875373	1.70561746599497e-15	3.60869e-13
TMEM231	884.820504457665	-0.625839	0.13010769321494	-4.81015974174785	1.50809722466302e-06	1.17562e-05
TMEM42	404.996703029476	-0.644491	0.100234659095141	-6.42982640106339	1.27749759110942e-10	3.70157e-09
TMEM50B	1726.88241850168	-0.766111	0.0897247568845119	-8.53846215909445	1.36019922187396e-17	1.01924e-14
TMEM63C	176.246908890099	0.769616	0.170469321041243	4.51468734112827	6.34102465347191e-06	4.12281e-05
TMEM70	682.023609142292	-0.686344	0.0909598463806902	-7.54557302850801	4.50303090455953e-14	5.3278e-12
TMEM71	129.618099146616	-0.901306	0.175541391718365	-5.13443576874624	2.82991718203421e-07	2.72021e-06
TMIE	194.415199842436	-1.16637	0.2236811869517	-5.2144211205359	1.84392143582671e-07	1.87988e-06
TMPRSS9	25.3211392713505	1.48626	0.321096604932659	4.62870479626627	3.6795985822395e-06	2.55695e-05
TMSB10	18319.2731536317	-0.748367	0.112093605367671	-6.67627173067075	2.45097341444073e-11	9.24073e-10
TMSL3	63103.6068966135	-0.861703	0.101214830728606	-8.51360553595147	1.68606898624132e-17	1.21289e-14
TNFAIP8L2	212.35821296009	-0.685574	0.138898260309699	-4.93579814960699	7.9823632716443e-07	6.73018e-06
TNFRSF11B	245.159705792204	-0.93331	0.197822608927138	-4.71791271572709	2.38276675613833e-06	1.74549e-05
TNFRSF13C	7.155699442706	1.58921	0.218948160202014	7.25838483856294	3.91739699546537e-13	3.06306e-11
TNFSF12-TNFSF13	283.760499943518	-0.906636	0.208988133812717	-4.33821522183407	1.43644455106875e-05	8.35209e-05
TNFSF13	662.661365818068	-0.621742	0.129297331218746	-4.80862002399823	1.51975770049223e-06	1.18266e-05
TNIK	811.056019776851	0.708542	0.118246633077184	5.99206909328316	2.07187858338131e-09	3.89756e-08
TNK2	1976.28619838328	0.941006	0.116188840915266	8.09893812267421	5.544097244947e-16	1.34737e-13
TNR	267.328019430011	2.37325	0.285171928668914	8.32217982989274	8.63601524797936e-17	3.45352e-14
TNRC18	2425.27659241654	0.597827	0.103187135670004	5.7936189934312	6.88856377121782e-09	1.09826e-07
TNRC6B	640.572806968967	0.626972	0.0881883740241885	7.10946314217327	1.16495205524736e-12	7.56336e-11
TNRC6C	570.523831797907	0.727106	0.10040100905945	7.24201391174695	4.4207049045212e-13	3.39752e-11
TOMM7	3002.28989754779	-0.623406	0.0800588064490537	-7.78685715972713	6.86965402660353e-15	1.15462e-12
TP53TG1	350.32206193107	-0.714025	0.106164876764359	-6.72562224670625	1.74843627328583e-11	7.08195e-10
TPT1	40761.1509234178	-0.804088	0.11065003689902	-7.2669457292532	3.67706444461143e-13	2.91314e-11
TRAPPC2L	812.236978509024	-0.625322	0.0923264064481759	-6.77294922982979	1.26183242620674e-11	5.49462e-10
TREM2	2017.63567909812	-0.829343	0.148415528243017	-5.58797739064875	2.29729544411027e-08	3.16127e-07
TRIAP1	729.826400982174	-0.589745	0.0813834967645107	-7.24649378278699	4.27698802321475e-13	3.3154e-11
TRIM67	84.773614612577	1.93872	0.307925783512102	6.29604750545006	3.0533083334074e-10	7.61591e-09
TRMT112	1677.89888564666	-0.616068	0.0748954460903729	-8.22570113189757	1.94052334802534e-16	5.91498e-14
TRPV3	13.6253148665188	0.842477	0.183683368411741	4.58657456973908	4.50577515236896e-06	3.06668e-05
TSHR	71.068875330606	2.44076	0.366404104005349	6.66137943371632	2.71269286661782e-11	1.00588e-09
TSHZ1	726.875994516472	0.623271	0.0891404102537738	6.99200993086234	2.70975694676267e-12	1.51652e-10
TSPAN6	1945.7702775894	-0.63038	0.0966847998303258	-6.51995120272159	7.0330267931579e-11	2.24257e-09
TSSK3	28.0463953199089	0.776513	0.152988017387692	5.07564807730667	3.86177471789189e-07	3.56703e-06
TTBK1	429.546146445466	0.767252	0.125615237884666	6.10795508390225	1.00915742384438e-09	2.12017e-08
TTC29	11.5794769659165	-1.80202	0.407320223058024	-4.42408272323816	9.68529063201253e-06	5.93864e-05
TTN	72.1300641383491	0.657511	0.153069889555151	4.2954941213972	1.74304656446531e-05	9.89487e-05
TUB	806.32896055579	0.616657	0.116687403983554	5.28469145721513	1.25916799003619e-07	1.34391e-06
TUBA1C	4558.95136441738	-0.72694	0.141683117200882	-5.13074309117651	2.88600582743273e-07	2.75927e-06
TUBB1	74.66693914171	-0.782802	0.140898031371356	-5.55580454488952	2.76335953282954e-08	3.6812e-07
TULP4	544.815899578686	0.591747	0.102038553397038	5.79924452785046	6.66143370273648e-09	1.06964e-07
TXNDC17	1025.67965178009	-0.731545	0.0918812821687735	-7.96185464811588	1.69479498113025e-15	3.60869e-13
TYROBP	2142.20661851631	-0.904191	0.142760418296269	-6.33362559210182	2.39466208913123e-10	6.16986e-09
UBD	253.986123230849	-1.32235	0.260256953630283	-5.08092287759522	3.75605597912611e-07	3.4837e-06
UBL5	3309.7783516524	-0.817881	0.0987323477942437	-8.28382365092538	1.19282202860993e-16	4.08423e-14
UBXN7	190.126590500399	0.652256	0.102683804712758	6.35208275132875	2.12418992526908e-10	5.54463e-09
UHRF1	618.471862583475	0.682356	0.157706524140625	4.32674728177201	1.51327414546919e-05	8.74228e-05
UQCR10	1845.99959237649	-0.597532	0.0953687206566523	-6.26549624683432	3.71639953554761e-10	8.95921e-09
UQCR11	2571.70752695081	-0.802825	0.102681530763152	-7.81859419699648	5.34165064521324e-15	9.41806e-13
UQCRQ	2900.80097327164	-0.846736	0.100151796907616	-8.45452669771252	2.80221676481901e-17	1.73776e-14
USMG5	661.934946412756	-0.61619	0.100117516224947	-6.154663254705	7.52371864851063e-10	1.64807e-08
USP49	21.1316038231275	1.25364	0.169801500193831	7.38299699713433	1.54765518837694e-13	1.4884e-11
USP54	1155.14730460653	0.749055	0.12481546586535	6.0013027159277	1.9574067020709e-09	3.70938e-08
UXT	1062.366457907	-0.6517	0.0933171586208287	-6.98370505949476	2.87495305131711e-12	1.57603e-10
VAMP5	1452.70910185039	-1.12841	0.139621743323061	-8.08189856992155	6.37661331682906e-16	1.50891e-13
VAMP8	924.47583625822	-1.06765	0.150330207273843	-7.10202748365773	1.22939773498142e-12	7.83871e-11
VAX1	13.0475127572823	1.80316	0.407462130031267	4.42535372812548	9.62843799497882e-06	5.90935e-05
VMO1	88.2387059593056	-0.862565	0.160189583694333	-5.3846518666064	7.25849970754128e-08	8.50403e-07
VPS13D	1335.62294845652	0.621758	0.0972229114466646	6.3951772843484	1.60361187699337e-10	4.39624e-09
VPS29	1422.15856263297	-0.675822	0.0851212599131409	-7.93952411438541	2.02958430369032e-15	4.19541e-13
VSTM1	12.093949372058	-1.81898	0.375675339615364	-4.8418998446811	1.28603584339797e-06	1.02518e-05
WASF1	885.647842396832	0.710542	0.149122311246961	4.76482910603105	1.89013777318215e-06	1.43488e-05
WDR61	1307.40072246083	-0.620716	0.0897928560175332	-6.91275063993201	4.75345105283681e-12	2.35499e-10
WDR62	291.062783482807	0.760718	0.15654427812036	4.85944325895084	1.17716312658484e-06	9.49332e-06
WFDC2	37.0463895368946	-0.978654	0.195726301540186	-5.00011325375014	5.72966485966606e-07	5.01584e-06
WFDC3	13.7030672536313	-1.21695	0.241503963599407	-5.03903999643834	4.67872712109143e-07	4.20711e-06
WFIKKN1	39.3944241742757	0.815438	0.181449960972676	4.49401072397112	6.98941061115829e-06	4.48279e-05
WHSC1	2131.76551663203	0.618827	0.0834941403430959	7.41162518944379	1.24760946764283e-13	1.23961e-11
WNK2	234.486537825733	1.17092	0.265723261722543	4.40653400843726	1.05037823212381e-05	6.36241e-05
WNK3	82.3944401055144	0.769453	0.142253385409078	5.40903173894504	6.33664004871709e-08	7.58709e-07
XKR4	24.005820115308	1.24401	0.261738445376827	4.75289145571642	2.00528015283583e-06	1.50639e-05
XRCC2	73.1606295036266	0.805339	0.139021395849837	5.7929145746646	6.91752977564424e-09	1.10093e-07
XYLT1	625.014801130991	0.711482	0.159003770549212	4.47462284667329	7.65463069787404e-06	4.8438e-05
ZBED3	60.6155837896363	0.719147	0.120658716081813	5.96017296531977	2.51971089183638e-09	4.61451e-08
ZBTB12	202.802171553914	0.821792	0.119403530627008	6.88247956785282	5.88196039639627e-12	2.82083e-10
ZBTB16	167.154394882784	0.87206	0.19169451513504	4.54921576940366	5.38462096708502e-06	3.56674e-05
ZBTB8B	37.1771309442565	0.67402	0.155259084114218	4.34125869487903	1.41668806445656e-05	8.24789e-05
ZCCHC14	883.206659817382	0.59947	0.0934907570147283	6.41207959262895	1.43547853670769e-10	4.03369e-09
ZEB2	2357.07316723736	0.624506	0.0925906026701535	6.74480860802553	1.53228872528365e-11	6.40853e-10
ZFAND2A	871.589906028457	-0.671512	0.108248856340075	-6.20340736540413	5.52535693450515e-10	1.25623e-08
ZKSCAN1	618.6886733356	0.650112	0.105288140380459	6.17460148761307	6.63305629586602e-10	1.47452e-08
ZMIZ1	2789.46311050358	0.686356	0.081855652134986	8.38494988766022	5.07473704080266e-17	2.40169e-14
ZMYND12	88.0774598104337	-1.04177	0.187480451064026	-5.55670534195245	2.74914264387287e-08	3.67042e-07
ZNF135	144.045389900822	0.81424	0.183639790313575	4.43389707766368	9.25448190653554e-06	5.70757e-05
ZNF192	408.515239576123	0.601996	0.109515463029116	5.49689983823998	3.86526092591062e-08	4.92301e-07
ZNF221	18.6194183967401	0.591432	0.131392845879459	4.50125250047302	6.75541959735581e-06	4.35871e-05
ZNF37A	243.275677811788	0.635283	0.10367236411134	6.12779964708175	8.91026860053917e-10	1.89636e-08
ZNF37B	250.222186112299	0.600777	0.134023285150812	4.48263157680264	7.37281550851674e-06	4.68679e-05
ZNF462	497.97468571969	0.975057	0.125328532748017	7.78001140726177	7.25180094689027e-15	1.20756e-12
ZNF469	202.74669812626	0.934744	0.177678462239863	5.26087567236769	1.43370956164897e-07	1.50783e-06
ZNF488	381.562036574101	1.53092	0.309092279279303	4.95295490101629	7.30949202435508e-07	6.23595e-06
ZNF541	11.4755737334739	-1.4311	0.276034139947713	-5.18451771079073	2.16574565474858e-07	2.16985e-06
ZNF609	940.084820393904	0.643718	0.0879772607552677	7.31686932083909	2.53822808067438e-13	2.17028e-11
ZNF618	237.850472683748	0.61322	0.133417841838755	4.59623490283542	4.30193692207773e-06	2.94279e-05
ZNF643	44.431595122208	0.670725	0.126923113779549	5.28449705098464	1.26050579580768e-07	1.34395e-06
ZNF646	411.719038166621	0.611241	0.0852151118992232	7.17291518597569	7.34173410822405e-13	5.09783e-11
ZNF676	7.7534138750821	2.91489	0.650333557141762	4.48215147091503	7.38942632206554e-06	4.69415e-05
ZNF697	123.404721772321	0.657257	0.127290850524695	5.16342453911537	2.42472355897788e-07	2.38938e-06
ZNF704	159.970970902973	0.895958	0.142403123006927	6.29170519053202	3.13997399703144e-10	7.79308e-09
ZNF711	701.973678325867	0.63932	0.122448247587052	5.22114496723511	1.77820269263001e-07	1.8253e-06
ZNF74	361.268135259702	0.621784	0.109251009515861	5.69133303977059	1.26051373486625e-08	1.8673e-07
ZNF778	76.6972796489706	0.581232	0.0939847289293714	6.18432842663249	6.23674030751095e-10	1.40027e-08
ZNF81	100.77403412402	0.607067	0.0968456884324596	6.26839035309744	3.64799356439902e-10	8.80611e-09
ZNF827	241.013437453868	0.714664	0.121080324376592	5.90239347488931	3.58265444919978e-09	6.19524e-08
ZNHIT1	2221.91853113708	-0.755574	0.0959964579903998	-7.87085024622477	3.52239071701739e-15	6.66807e-13

## Sheet: DAVID_analysis
Category	Term	Count	%	PValue	Genes	List Total	Pop Hits	Pop Total	Fold Enrichment	Bonferroni	Benjamini	FDR
KEGG_PATHWAY	hsa00190:Oxidative phosphorylation	40	4.268943436499466	3.808440904047462E-21	NDUFB9, COX7B, NDUFA13, NDUFB7, NDUFB6, NDUFA11, NDUFB5, NDUFB3, NDUFB2, ATP5J, NDUFB1, COX7A2, ATP5I, UQCR11, ATP5G3, UQCR10, ATP5H, ATP5O, COX5B, COX6A1, ATP5G1, COX7C, ATP5L, ATP5E, ATP6V0A4, NDUFV2, ATP6V1F, ATP6V0B, NDUFA7, ATP6V0E1, NDUFA4, NDUFA3, NDUFA2, NDUFA1, NDUFC1, SDHD, ATP5J2, COX7A2L, UQCRQ, NDUFAB1	330	133	6879	6.26930963773069	9.254511396835333E-19	9.25451e-19	9.06408935163296E-19
KEGG_PATHWAY	hsa03010:Ribosome	37	3.9487726787620065	5.6601672331865464E-18	MRPS15, RPL34, MRPS12, RPS27L, MRPL34, MRPL13, RPL9, MRPL33, MRPL11, RPS14, RPS15A, RPS19, RPL18A, RPS18, RPL36, RPS3, RPL35, RPS11, RPL39, RPS10, RPS13, RPL41, RPS9, RPS7, RPS5, RPS6, RPL13A, RPS3A, MRPL22, RPS29, RPL27A, RPL24, RPL27, RPL22L1, RPS21, RSL24D1, RPL26L1	330	136	6879	5.671189839572192	1.3754206376643308E-15	6.8771e-16	6.73559900749199E-16
UP_KEYWORDS	Ribosomal protein	42	4.482390608324439	4.51277605916774E-18	MRPS15, MRPS36, MRPS33, RPL34, COL11A2, MRPS12, RPS27L, MRPL34, MRPL13, RPL9, MRPL54, MRPL33, MRPL11, RPS14, RPS15A, RPS19, RPL18A, RPS18, RPL36, RPS3, RPL35, RPS11, RPL39, RPS10, RPS13, MRPS28, RPL41, RPS9, RPS7, RPS5, MRPS23, RPS6, RPL13A, RPS3A, MRPL22, RPS29, RPL27A, RPL24, RPL27, RPL22L1, RPS21, RPL26L1	907	185	20581	5.151536100598945	1.908904273027954E-15	1.9089e-15	1.8141359757854316E-15
KEGG_PATHWAY	hsa05010:Alzheimer's disease	40	4.268943436499466	3.025550349242977E-17	NDUFB9, COX7B, NDUFA13, NDUFB7, NDUFB6, NDUFA11, NDUFB5, NDUFB3, NDUFB2, ATP5J, NDUFB1, COX7A2, UQCR11, ATP2A1, ATP5G3, UQCR10, ATP5H, ATP5O, COX5B, COX6A1, ATP5G1, COX7C, ATP5E, NOS1, NDUFV2, PSENEN, NDUFA7, NDUFA4, NDUFA3, NDUFA2, NDUFA1, NDUFC1, SDHD, ERN1, COX7A2L, PLCB4, UQCRQ, NDUFAB1, FAS, MAPT	330	168	6879	4.963203463203463	7.352087348660435E-15	2.4507e-15	2.400269943732762E-15
KEGG_PATHWAY	hsa05016:Huntington's disease	40	4.268943436499466	4.422081211068245E-15	NDUFB9, COX7B, NDUFA13, HIP1, NDUFB7, NDUFB6, NDUFA11, NDUFB5, DNAH8, NDUFB3, NDUFB2, ATP5J, NDUFB1, COX7A2, UQCR11, ATP5G3, UQCR10, ATP5H, ATP5O, COX5B, COX6A1, ATP5G1, COX7C, ATP5E, EP300, POLR2G, NDUFV2, POLR2L, NDUFA7, DNAH10, NDUFA4, NDUFA3, NDUFA2, NDUFA1, NDUFC1, SDHD, COX7A2L, PLCB4, UQCRQ, NDUFAB1	330	192	6879	4.34280303030303	1.0791367799356522E-12	2.68641e-13	2.631138320585606E-13
KEGG_PATHWAY	hsa05012:Parkinson's disease	34	3.628601921024546	1.0767419161412129E-14	NDUFB9, COX7B, NDUFA13, NDUFB7, NDUFB6, NDUFA11, NDUFB5, NDUFB3, NDUFB2, ATP5J, NDUFB1, COX7A2, UQCR11, ATP5G3, UQCR10, ATP5H, ATP5O, COX5B, COX6A1, ATP5G1, COX7C, ADCY5, ATP5E, NDUFV2, NDUFA7, NDUFA4, NDUFA3, NDUFA2, NDUFA1, NDUFC1, SDHD, COX7A2L, UQCRQ, NDUFAB1	330	142	6879	4.991165172855314	2.6169066913439565E-12	5.23297e-13	5.125291520832174E-13
GOTERM_CC_DIRECT	GO:0005840~ribosome	37	3.9487726787620065	5.351145276319471E-15	MRPS15, MRPS33, RPL34, COL11A2, RPS27L, MRPL34, MRPL13, RPL9, MRPL54, MRPL11, RPS14, RPS15A, RPS19, RPL18A, RPS18, RPL36, RPS3, RPL35, RPS11, RPS10, RPS13, MRPS28, RPL41, RPS9, RPS7, MRPS23, RPS6, RPL13A, RPS3A, MT3, RPS29, RPL27A, RPL24, RPL27, RPL22L1, RPS21, RSL24D1	845	166	18224	4.807072075283383	3.0588864774472313E-12	3.07156e-12	3.0126947905678623E-12
UP_KEYWORDS	Ribonucleoprotein	46	4.909284951974386	3.305408955408032E-13	MRPS15, MRPS36, MRPS33, RPL34, COL11A2, MRPS12, RPS27L, MRPL34, MRPL13, RPL9, MRPL54, MRPL33, MRPL11, RPS14, RPS15A, RPS19, SNRPD2, RPL18A, RPS18, RPL36, RPS3, RPL35, RPS11, RPL39, RPS10, RPS13, MRPS28, RPL41, RPS9, RPS7, RPS5, MRPS23, RPS6, RPL13A, RPS3A, MRPL22, RPS29, RPL27A, SNRPG, RPL24, RPL27, RPL22L1, SNRPE, RPS21, NOP10, RPL26L1	907	296	20581	3.5263491164814202	1.3980716584427455E-10	6.99094e-11	6.643872000370144E-11
GOTERM_MF_DIRECT	GO:0003735~structural constituent of ribosome	41	4.375667022411953	1.315984519943032E-13	MRPS15, MRPS36, MRPS33, RPL34, MRPS12, RPS27L, MRPL34, MRPL13, RPL9, MRPL33, MRPL11, RPS14, RPS15A, RPS19, RPL18A, RPS18, RPL36, RPS3, RPL35, RPS11, RPL39, RPS10, RPS13, RPL41, NDUFA7, RPS9, RPS7, RPS5, MRPS23, RPS6, RPL13A, RPS3A, MRPL22, RPS29, RPL27A, RPL24, RPL27, RPL22L1, RPS21, RSL24D1, RPL26L1	787	222	16881	3.961451286101858	1.0814349415966262E-10	1.08174e-10	1.0751593527934571E-10
UP_KEYWORDS	Respiratory chain	21	2.2411953041622197	1.3609747369627245E-12	NDUFB9, NDUFA13, NDUFA7, NDUFB7, NDUFB6, NDUFA11, NDUFB5, NDUFA4, NDUFA3, NDUFB3, NDUFA2, NDUFB2, NDUFA1, NDUFB1, NDUFC1, UQCR11, UQCR10, HIGD1A, UQCRQ, NDUFAB1, NDUFV2	907	63	20581	7.563763322307976	5.757124776906153E-10	1.91897e-10	1.8237061475300507E-10
UP_KEYWORDS	Mitochondrion inner membrane	42	4.482390608324439	3.913653069932241E-12	NDUFB9, COX7B, NDUFA13, NDUFB7, ATP5EP2, NDUFB6, NDUFA11, NDUFB5, NDUFB3, NDUFB2, ATP5J, NDUFB1, COX7A2, ATP5I, UQCR11, UQCR10, ATP5H, HIGD1A, ATP5O, COX5B, COX6A1, COX7C, TMEM70, ATP5L, C19ORF70, ATP5E, RPS3, ROMO1, NDUFV2, TIMM8B, DNAJC19, NDUFA7, SURF1, NDUFA4, NDUFA3, NDUFA2, NDUFA1, NDUFC1, SDHD, ATP5J2, COX7A2L, UQCRQ	907	270	20581	3.529756217077055	1.655472758876897E-9	4.13869e-10	3.9332213352819024E-10
GOTERM_BP_DIRECT	GO:0006614~SRP-dependent cotranslational protein targeting to membrane	27	2.88153681963714	1.9445327170240563E-13	RPL34, RPL9, RPS14, RPS15A, RPS19, RPL18A, RPS18, RPL36, RPS3, RPL35, RPS11, RPL39, RPS10, RPS13, RPL41, RPS9, RPS7, RPS5, RPS6, RPL13A, RPS3A, RPS29, RPL27A, RPL24, RPL27, RPS21, RPL26L1	812	94	16792	5.939943402159103	5.623993493131252E-10	5.62553e-10	5.609976888614402E-10
KEGG_PATHWAY	hsa04932:Non-alcoholic fatty liver disease (NAFLD)	31	3.3084311632870866	1.4079910687308902E-11	NDUFB9, COX7B, NDUFA13, NDUFB7, NDUFB6, NDUFA11, NDUFB5, NDUFB3, NDUFB2, NDUFB1, COX7A2, UQCR11, UQCR10, COX5B, COX6A1, COX7C, AKT3, NDUFV2, MLXIP, NDUFA7, NDUFA4, NDUFA3, NDUFA2, NDUFA1, NDUFC1, SDHD, ERN1, COX7A2L, UQCRQ, NDUFAB1, FAS	330	151	6879	4.279530403371463	3.4214301392054836E-9	5.70236e-10	5.585031239299197E-10
GOTERM_CC_DIRECT	GO:0005743~mitochondrial inner membrane	58	6.189967982924227	2.073020636863738E-12	NDUFA13, MRPS15, COX7B, NDUFA11, MRPS12, COX6A1, MRPL34, ATP5G1, COX7C, MRPL33, LGALS3, HERC2, MRPS28, MRPS23, NDUFC1, SDHD, ATP5J2, COX7A2L, TMEM126B, NDUFB9, NDUFB7, ATP5EP2, NDUFB6, MRPS36, NDUFB5, MRPS33, NDUFB3, NDUFB2, ATP5J, NDUFB1, ATP5I, UQCR11, UQCR10, ATP5H, HIGD1A, ATP5O, COX5B, MRPL13, TMEM70, MRPL54, ATP5L, MRPL11, C19ORF70, RPS3, ROMO1, RHBDL3, NDUFV2, TIMM8B, DNAJC19, SURF1, NDUFA…	845	441	18224	2.836458291403346	1.189906839726973E-9	5.94957e-10	5.835553092771423E-10
UP_KEYWORDS	Electron transport	24	2.5613660618996796	2.499143760672006E-10	NDUFB9, NDUFA13, NDUFA7, NDUFB7, NDUFB6, NDUFA11, NDUFB5, NDUFA4, NDUFA3, NDUFB3, NDUFA2, NDUFB2, NDUFA1, NDUFB1, NDUFC1, GLRX, UQCR11, CYBA, UQCR10, SDHD, HIGD1A, UQCRQ, NDUFAB1, NDUFV2	907	108	20581	5.04250888153865	1.057137951621101E-7	2.11428e-08	2.009311583580293E-8
GOTERM_BP_DIRECT	GO:0019083~viral transcription	27	2.88153681963714	1.577219790567006E-11	RPL34, RPL9, RPS14, RPS15A, RPS19, RPL18A, RPS18, RPL36, RPS3, RPL35, RPS11, RPL39, RPS10, RPS13, RPL41, RPS9, RPS7, RPS5, RPS6, RPL13A, RPS3A, RPS29, RPL27A, RPL24, RPL27, RPS21, RPL26L1	812	112	16792	4.985309641097818	4.562886180004E-8	2.28145e-08	2.2751395478929065E-8
GOTERM_CC_DIRECT	GO:0005747~mitochondrial respiratory chain complex I	17	1.814300960512273	3.0970462724190606E-10	NDUFB9, NDUFA13, NDUFA7, NDUFB7, NDUFB6, NDUFA11, NDUFB5, NDUFA4, NDUFA3, NDUFB3, NDUFA2, NDUFB2, NDUFA1, NDUFB1, NDUFC1, NDUFAB1, NDUFV2	845	49	18224	7.482381354908828	1.7777042193856119E-7	5.92568e-08	5.812123504573104E-8
GOTERM_BP_DIRECT	GO:0000184~nuclear-transcribed mRNA catabolic process, nonsense-mediated decay	27	2.88153681963714	6.755917957315815E-11	RPL34, RPL9, RPS14, RPS15A, RPS19, RPL18A, RPS18, RPL36, RPS3, RPL35, RPS11, RPL39, RPS10, RPS13, RPL41, RPS9, RPS7, RPS5, RPS6, RPL13A, RPS3A, RPS29, RPL27A, RPL24, RPL27, RPS21, RPL26L1	812	119	16792	4.692056132797947	1.954486900102026E-7	6.51496e-08	6.496941102285374E-8
GOTERM_BP_DIRECT	GO:0006412~translation	40	4.268943436499466	1.1744236946989249E-10	MRPS15, MRPS36, MRPS33, RPL34, MRPS12, RPS27L, MRPL34, MRPL13, RPL9, MRPL11, RPS14, RPS15A, RPS19, RPL18A, RPS18, RPL36, RPS3, RPL35, RPS11, RPL39, RPS10, RPS13, RPL41, RPS9, RPS7, RPS5, MRPS23, RPS6, RPL13A, SOX11, RPS3A, MRPL22, RPS29, RPL27A, RPL24, RPL27, RPL22L1, RPS21, RSL24D1, RPL26L1	812	253	16792	3.269534064136763	3.397607740707187E-7	8.49402e-08	8.470530898015996E-8
GOTERM_CC_DIRECT	GO:0022627~cytosolic small ribosomal subunit	16	1.7075773745997866	2.2314323493665905E-9	RPS9, RPS7, RPS5, RPS6, RPS27L, RPS3A, RPS14, RPS15A, RPS19, RPS18, RPS29, RPS3, RPS11, RPS21, RPS10, RPS13	845	48	18224	7.188954635108481	1.2808413627496407E-6	3.20211e-07	3.1407410317334764E-7
GOTERM_BP_DIRECT	GO:0006120~mitochondrial electron transport, NADH to ubiquinone	17	1.814300960512273	5.665535204191406E-10	NDUFB9, NDUFA13, NDUFA7, NDUFB7, NDUFB6, NDUFA11, NDUFB5, NDUFA4, NDUFA3, NDUFB3, NDUFA2, NDUFB2, NDUFA1, NDUFB1, NDUFC1, NDUFAB1, NDUFV2	812	49	16792	7.174625515230723	1.63903784822228E-6	3.27808e-07	3.2690138128184415E-7
GOTERM_BP_DIRECT	GO:0006364~rRNA processing	35	3.7353255069370332	8.264267453785063E-10	RPL34, CHD7, RPS27L, RPL9, RPS14, EMG1, RPS15A, PDCD11, RPS19, RPL18A, RPS18, RPL36, RPS3, RPL35, RPS11, RPL39, RPS10, MDN1, RPS13, RPL41, RPS9, RPS7, RPS5, RPS6, RPL13A, RPS3A, CSNK1E, RPS29, RPL27A, C1D, RPL24, PIH1D2, RPL27, RPS21, RPL26L1	812	214	16792	3.3822107637769903	2.3908496000757395E-6	3.98475e-07	3.9737352673616507E-7
GOTERM_BP_DIRECT	GO:0006413~translational initiation	27	2.88153681963714	1.7405322612754247E-9	RPL34, RPL9, RPS14, RPS15A, RPS19, RPL18A, RPS18, RPL36, RPS3, RPL35, RPS11, RPL39, RPS10, RPS13, RPL41, RPS9, RPS7, RPS5, RPS6, RPL13A, RPS3A, RPS29, RPL27A, RPL24, RPL27, RPS21, RPL26L1	812	137	16792	4.075581604401137	5.035347195314621E-6	7.19337e-07	7.173479391113715E-7
GOTERM_MF_DIRECT	GO:0008137~NADH dehydrogenase (ubiquinone) activity	16	1.7075773745997866	2.3822629027996694E-9	NDUFB9, NDUFA13, NDUFA7, NDUFB7, NDUFB6, NDUFB5, NDUFA4, NDUFA3, NDUFB3, NDUFA2, NDUFB2, NDUFA1, NDUFB1, NDUFC1, NDUFAB1, NDUFV2	787	48	16881	7.149936467598475	1.9582182236854706E-6	9.7911e-07	9.73154395793665E-7
GOTERM_CC_DIRECT	GO:0005753~mitochondrial proton-transporting ATP synthase complex	11	1.1739594450373532	9.537983630879523E-9	C14ORF2, ATP5E, USMG5, ATP5J, ATP5I, ATP5G3, ATP5H, ATP5O, ATP5G1, ATP5L, ATP5J2	845	21	18224	11.296928712313328	5.474787640236123E-6	1.09496e-06	1.0739769568370342E-6
GOTERM_CC_DIRECT	GO:0070062~extracellular exosome	188	20.064034151547492	7.75412016873984E-8	RAB3B, VPS29, NDUFA13, RPL34, PCDH11X, HP, CIB1, HNMT, ALDH1L2, TXNDC17, RPS14, LGALS3, LGALS1, EFEMP1, RPS19, SNRPD2, RPS18, TUBB1, RPS11, B2M, RPS10, EPHB1, RPS13, EYS, TECTA, SKP1, RPS9, SLC38A1, IAH1, RPS7, RPS5, IGFBP3, KRT7, CMBL, RNASE3, RNASE2, SDCBP2, ATP5J2, BCR, SULT2B1, PROCR, SFRP1, MYL6, AZGP1, SLPI, DAAM2, RAB34, PSME1, S100A6, RPL24, RPL27, ZNF711, S100A4, SNRPE, MASP2, TNIK, PHPT…	845	2811	18224	1.4423943131274222	4.4507660995618537E-5	7.41811e-06	7.275949425000883E-6
UP_KEYWORDS	Hydrogen ion transport	14	1.4941302027748131	1.2873682324884853E-7	ATP6V0B, ATP6V0E1, ATP5EP2, ATP5J, ATP5I, ATP5G3, ATP5H, ATP5O, ATP5G1, ATP5L, ATP5J2, ATP5E, ATP6V0A4, ATP6V1F	907	49	20581	6.483225704835407	5.44541970359802E-5	9.07595e-06	8.625367157672852E-6
GOTERM_BP_DIRECT	GO:0032981~mitochondrial respiratory chain complex I assembly	17	1.814300960512273	3.283598142751817E-8	NDUFB9, NDUFA13, NDUFA7, NDUFB7, NDUFB6, NDUFA11, NDUFB5, NDUFA3, NDUFB3, NDUFA2, NDUFB2, NDUFA1, NDUFB1, NDUFC1, NDUFAB1, TMEM126B, NDUFV2	812	63	16792	5.580264289623895	9.498998385304436E-5	1.18743e-05	1.184147580229874E-5
UP_KEYWORDS	Mitochondrion	86	9.178228388473853	5.981838516198371E-7	ISCA2, NDUFA13, MRPS15, COX7B, NDUFA11, MRPS12, HSCB, ATP5G3, TRIAP1, ALKBH7, COX6A1, MRPL34, ATP5G1, ALDH1L2, COX7C, CLYBL, SYNE2, MRPL33, PYCARD, HEBP2, CHCHD5, RGS2, ATCAY, C14ORF2, CASP4, KIF1B, TMEM14C, MRPS28, CMC1, MRPS23, USMG5, NDUFC1, SDHD, ATP5J2, RAB32, COX7A2L, HAX1, ETHE1, TMEM126B, NDUFB9, MYCBP, NDUFB7, ATP5EP2, NDUFB6, MRPS36, NDUFB5, MRPS33, NDUFB3, NDUFB2, ATP5J, NDUFB1, ATP5I,…	907	1119	20581	1.7439239831594793	2.5299983508064727E-4	3.61474e-05	3.435284405016779E-5
SMART	SM00129:KISc	14	1.4941302027748131	1.2054477585270098E-7	KIF14, KIF11, CENPE, KIF9, KIF18B, KIF26A, KIF4B, KIF5C, KIFC1, KIF4A, KIF13A, KIF1B, KIF1A, KIF21B	488	45	10057	6.411566484517305	3.917628709459997E-5	3.91771e-05	3.917705215212782E-5
GOTERM_CC_DIRECT	GO:0005871~kinesin complex	14	1.4941302027748131	6.185202831766626E-7	KIF14, KIF11, CENPE, KIF9, KIF18B, KIF26A, KIF4B, KIF5C, KIFC1, KIF4A, KIF13A, KIF1B, KIF1A, KIF21B	845	53	18224	5.696907446689741	3.5496773640142365E-4	5.07187e-05	4.9746702775494437E-5
GOTERM_BP_DIRECT	GO:0042776~mitochondrial ATP synthesis coupled proton transport	10	1.0672358591248665	2.3797145262022355E-7	ATP5E, ATP5J, ATP5I, ATP5G3, ATP5H, COX5B, ATP5O, ATP5G1, ATP5L, ATP5J2	812	21	16792	9.847525216983344	6.882145660898065E-4	7.64946e-05	7.628307120103833E-5
UP_KEYWORDS	Motor protein	21	2.2411953041622197	1.8980710408603084E-6	DNAH10, DYNLT1, DNAH8, KIF14, MYO5A, KIF11, MYL12B, DNM3, CENPE, KIF9, MYL6, KIF18B, KIF26A, KIF4B, KIF5C, KIFC1, KIF4A, KIF13A, KIF1B, KIF1A, KIF21B	907	135	20581	3.529756217077055	8.025625864969133E-4	0.000100361	9.537806980323049E-5
UP_SEQ_FEATURE	domain:Kinesin-motor	14	1.4941302027748131	4.045894961967802E-8	KIF14, KIF11, CENPE, KIF9, KIF18B, KIF26A, KIF4B, KIF5C, KIFC1, KIF4A, KIF13A, KIF1B, KIF1A, KIF21B	904	44	20063	7.061594931617056	1.1121546989767417E-4	0.000111262	1.1122165250449488E-4
INTERPRO	IPR001752:Kinesin, motor domain	14	1.4941302027748131	8.612998309683978E-8	KIF14, KIF11, CENPE, KIF9, KIF18B, KIF26A, KIF4B, KIF5C, KIFC1, KIF4A, KIF13A, KIF1B, KIF1A, KIF21B	870	45	18559	6.636679438058748	1.264308276520687E-4	0.000126439	1.264388151861608E-4
INTERPRO	IPR019821:Kinesin, motor region, conserved site	13	1.3874066168623265	2.314037483991016E-7	KIF14, KIF11, CENPE, KIF9, KIF18B, KIF4B, KIF5C, KIFC1, KIF4A, KIF13A, KIF1B, KIF1A, KIF21B	870	41	18559	6.763863190356042	3.3964305016942475E-4	0.00016985	1.6985035132494058E-4
GOTERM_CC_DIRECT	GO:0031012~extracellular matrix	34	3.628601921024546	2.8968613311527283E-6	FBN3, CSTA, NID1, ATP5O, RPL9, THSD4, RPS14, LGALS3, CLEC3B, RPS15A, EFEMP1, LGALS1, RPS19, RPS18, RPS3, IGFBP7, NDP, RPS11, RPS10, RPS13, CDON, ANXA2, RPS7, RPS5, TFPI2, RPS3A, DCN, MFAP4, SFRP1, MYL6, SLPI, MGP, RPL27, HIST1H4J	845	296	18224	2.4772749080441385	0.0016614191251901334	0.00020785	2.0386661617987324E-4
GOTERM_CC_DIRECT	GO:0000276~mitochondrial proton-transporting ATP synthase complex, coupling factor F(o)	7	0.7470651013874066	7.045087872318396E-6	ATP5J, ATP5I, ATP5G3, ATP5H, ATP5G1, ATP5L, ATP5J2	845	12	18224	12.580670611439842	0.004035729151968259	0.00044932	4.407093857905841E-4
GOTERM_CC_DIRECT	GO:0022625~cytosolic large ribosomal subunit	14	1.4941302027748131	1.212293698275527E-5	RPL41, RPL34, RPL13A, RPL9, RPL18A, RPL27A, RPL36, RPL24, RPL35, RPL27, RPL22L1, RSL24D1, RPL39, RPL26L1	845	68	18224	4.4402366863905325	0.006934452955833614	0.000695857	6.825213521291216E-4
UP_KEYWORDS	CF(0)	7	0.7470651013874066	1.5857577308885603E-5	ATP5J, ATP5I, ATP5G3, ATP5H, ATP5G1, ATP5L, ATP5J2	907	14	20581	11.345644983461963	0.0066853612583257505	0.000745306	7.083051197968903E-4
UP_KEYWORDS	Microtubule	30	3.2017075773745995	1.817571217942119E-5	NUMA1, DNAH8, KIF14, KIF11, TUBA1C, MAP1LC3A, KIF5C, TUBB1, KIF13A, KIF1B, KIF21B, KIF1A, GTSE1, APC2, DNAH10, DYNLT1, SPAG5, NAV1, DNM3, CENPE, KIF9, NIN, KIF18B, KIF4B, INCENP, KIF26A, KIFC1, KIF4A, CENPJ, MAPT	907	280	20581	2.431209639313278	0.007658916005665262	0.000768833	7.30663629612732E-4
UP_KEYWORDS	Phosphoprotein	424	45.250800426894344	2.0967825378335134E-5	MDC1, MAML2, RPL34, BACH2, DPYSL4, MYB, AKT3, RPL35, DIP2C, GTSE1, GABARAPL2, SOX11, SOX10, BCR, SULT2B1, MYL6, DAAM2, ETHE1, RPL24, TMEM126B, PRR11, SAR1B, AGAP2, WDR62, IQGAP3, SULT1A1, FAM171A2, FLRT1, S100A13, S100A11, PROM2, ABCA2, AFAP1L2, RAB3IP, MEX3B, MEX3A, FASN, STRN, PLCH2, XKR4, SETD5, TCF20, MRPL34, TRMT112, TUBA1C, DLGAP1, JARID2, APC2, BRD3, ANXA2, GSTO1, KCND3, ANXA4, TET1, CIT, …	907	8246	20581	1.1667604833829426	0.008830265289756167	0.000806308	7.662787092809749E-4
GOTERM_MF_DIRECT	GO:0003777~microtubule motor activity	16	1.7075773745997866	3.5955761019921428E-6	DNAH10, DNAH8, KIF14, KIF11, CENPE, KIF9, KIF18B, KIF26A, KIF4B, KIF5C, KIFC1, KIF4A, KIF13A, KIF1B, KIF1A, KIF21B	787	80	16881	4.289961880559085	0.002951205475464569	0.000985188	9.791952251091934E-4
GOTERM_BP_DIRECT	GO:0006754~ATP biosynthetic process	10	1.0672358591248665	5.717758105121069E-6	SURF1, ATP5E, ATP5J, ATP5I, ATP5G3, ATP5H, ATP5O, ATP5G1, ATP5L, ATP5J2	812	29	16792	7.130966536436215	0.01640546176631974	0.00165415	0.0016495732133274283
GOTERM_BP_DIRECT	GO:0007018~microtubule-based movement	16	1.7075773745997866	6.576937458158014E-6	DNAH10, DNAH8, KIF14, KIF11, CENPE, KIF9, KIF18B, KIF26A, KIF4B, KIF5C, KIFC1, KIF4A, KIF13A, KIF1B, KIF1A, KIF21B	812	81	16792	4.0848993492671655	0.01884726919084556	0.00172973	0.0017249513242532607
GOTERM_MF_DIRECT	GO:0015078~hydrogen ion transmembrane transporter activity	10	1.0672358591248665	1.0475728750129014E-5	ATP6V0B, ATP6V0E1, ATP5J, ATP5I, ATP6V0A4, ATP5G3, ATP5H, ATP5G1, ATP6V1F, ATP5L	787	32	16881	6.70306543837357	0.00857412485673159	0.00215276	0.002139667597213851
GOTERM_MF_DIRECT	GO:0008017~microtubule binding	26	2.774813233724653	1.3518886445309763E-5	NUMA1, CETN2, KIF14, KIF11, UXT, MAP1LC3A, KIF5C, KIF13A, RPS3, KIF1B, KIF21B, KIF1A, APC2, GABARAPL2, CRIPT, DNM3, CENPE, KIF9, KIF18B, KIF4B, KIF26A, KIFC1, KIF4A, MAPT, S100A8, TPT1	787	208	16881	2.681226175349428	0.011051082917924226	0.0022225	0.0022089860451636155
UP_KEYWORDS	Ubiquinone	9	0.96051227321238	1.11467391514153E-4	NDUFA13, NDUFB5, NDUFA4, NDUFA3, NDUFB3, NDUFB2, NDUFA1, NDUFB1, NDUFV2	907	35	20581	5.834903134351866	0.046058885888481504	0.00392923	0.0037341576157241254
GOTERM_CC_DIRECT	GO:0005739~mitochondrion	92	9.818569903948772	1.0614029930551495E-4	ISCA2, NDUFA13, MRPS15, COX7B, NDUFA11, RPL34, MRPS12, ATP2A1, HSCB, TRIAP1, MRPL34, ATP5G1, ALDH1L2, COX7C, CLYBL, SYNE2, PYCARD, HEBP2, RPS14, FUNDC2, TMEM223, RGS2, ATCAY, C14ORF2, CASP4, DACT2, KIF1B, NOS1, CLIC1, MRPS28, LYPLA1, GPX1, CMC1, MRPS23, USMG5, ACYP2, NDUFC1, CYBA, SDHD, ERN1, RAB32, HAX1, ETHE1, NDUFB9, MYCBP, NDUFB7, ATP5EP2, NDUFB6, MRPS36, NDUFB5, MRPS33, AGAP2, ATP5J, NDUFB1,…	845	1331	18224	1.490722373621293	0.059108797688881	0.00553859	0.005432453500818629
UP_KEYWORDS	Acetylation	192	20.490928495197437	2.0383406476300972E-4	ANKRD13B, MDC1, VPS29, NDUFA13, GOLT1B, NDUFA11, RPL34, GMFG, RFESD, MKI67, FBXO22, ALDH1L2, RPL9, TXNDC17, CHCHD5, LGALS3, LGALS1, RPS19, SNRPD2, RPS18, AKT3, MYB, RPL36, RPL35, EP300, RPS11, TMSB10, BAHCC1, RPS13, SRRM2, GABARAPL2, RPS9, RPS7, RPS5, CMC1, RPS6, IPMK, KRT7, ACYP2, CMBL, ATP5J2, RBX1, BCR, RAB32, MYL6, COX7A2L, RAB34, ETHE1, S100A6, RPL24, RPL27, S100A4, GEMIN7, PHPT1, FTL, ATP5J…	907	3424	20581	1.272408783191996	0.08261733983455144	0.00663245	0.006303176464209993
GOTERM_CC_DIRECT	GO:0015935~small ribosomal subunit	8	0.8537886872998933	1.7531135551940432E-4	RPS9, RPS29, RPS18, RPS5, RPS6, MRPS12, RPS3, RPS21	845	27	18224	6.390181897874205	0.09573926796069598	0.00838573	0.008225024429785385
GOTERM_MF_DIRECT	GO:0008574~ATP-dependent microtubule motor activity, plus-end-directed	7	0.7470651013874066	7.952436957700431E-5	KIF18B, KIF5C, KIF26A, KIF4B, KIF4A, KIF14, KIF11	787	17	16881	8.832274459974586	0.06328071537652258	0.00933843	0.009281629992058931
GOTERM_MF_DIRECT	GO:0046933~proton-transporting ATP synthase activity, rotational mechanism	7	0.7470651013874066	7.952436957700431E-5	ATP5EP2, ATP5E, ATP5G3, ATP5H, ATP5O, ATP5G1, ATP5L	787	17	16881	8.832274459974586	0.06328071537652258	0.00933843	0.009281629992058931
UP_KEYWORDS	Transport	119	12.700106723585913	3.716721277606402E-4	RAB3B, VPS29, NDUFA13, DGKD, GOLT1B, NDUFA11, ATCAY, KIF5C, SLC26A10, SLC16A4, CHRNB2, GABARAPL2, SLC38A1, ATP6V0E1, TRAPPC2L, KCNH7, KCNH8, CACNA2D2, CYBA, SDHD, ATP5J2, RBP3, RAB34, SCN8A, SCG5, KCTD16, SLC26A1, TMEM63C, CHRNA4, SAR1B, SLC1A1, AGAP2, ATP5J, ATP5I, ATP5H, ATP5O, HIGD1A, ATP5L, CACNA1G, ATP5E, S100A13, ATP6V0A4, KCNN3, NDUFV2, SCN3A, PLTP, ATP6V1F, DNAJC19, ABCA2, RANBP17, RAB3IP…	907	1978	20581	1.3651483852699429	0.14550662876120812	0.0112298	0.010672299668555527
GOTERM_BP_DIRECT	GO:0015986~ATP synthesis coupled proton transport	8	0.8537886872998933	5.381935841110451E-5	ATP5EP2, ATP5J, ATP6V0A4, ATP5G3, ATP5H, ATP5O, ATP5G1, ATP5L	812	22	16792	7.519928347514555	0.14418717904024936	0.012975	0.012939070751336375
GOTERM_MF_DIRECT	GO:0016887~ATPase activity	22	2.3479188900747063	1.2660076499954813E-4	ABCA2, DNAH10, ATP5EP2, DNAH8, KIF14, ATP5J, ATP5I, ATP5H, ATP5O, SMARCA4, ATP5L, ATP5J2, CENPE, KIF9, KIF26A, KIFC1, ATP5E, KIF13A, KIF1B, KIF1A, KIF21B, MDN1	787	183	16881	2.578665611265024	0.0988399640610863	0.0130082	0.012929103125578852
UP_KEYWORDS	ATP synthesis	6	0.6403415154749199	4.757512440653007E-4	ATP5EP2, ATP5E, ATP5I, ATP5O, ATP5L, ATP5J2	907	16	20581	8.509233737596473	0.18232527010833566	0.0134162	0.012750133340950058
UP_KEYWORDS	Cytoplasm	255	27.2145144076841	5.368223122573573E-4	VPS29, SCOC, BACH2, TXNDC17, CCT6B, UXT, LGALS3, HERC2, DPYSL4, SNRPD2, RPS18, ZMIZ1, AKT3, FBXO6, KIF21B, RPS10, GTSE1, KRT7, CMBL, CSNK1E, SOX10, MAPK8IP3, SULT2B1, SPATA17, ETHE1, PRR11, CAPSL, EPB41, AGAP2, WDR61, DAZ1, WDR62, TTBK1, C12ORF57, SULT1A1, COMMD8, PRDX4, BLOC1S1, FLRT1, S100A13, S100A11, SPTBN2, ZBED3, AFAP1L2, DNAH10, APOBEC3G, SPHKAP, XRCC2, RANBP17, RAB3IP, MICAL3, MTHFS, GDF3…	907	4816	20581	1.2014698798931898	0.20318823666146824	0.0141922	0.013487660595466102
UP_KEYWORDS	Ion transport	47	5.016008537886873	8.377116062311951E-4	RYR1, HCN3, SLC26A1, ATP5EP2, TMEM63C, CHRNA4, KCNA2, KCNA3, ATP5J, ATP5I, ATP2A1, ATP5G3, ATP5H, ATP5O, ATP5G1, ATP5L, CACNA1G, GABRR2, ATP5E, ATP6V0A4, KCNN3, LRRC8B, CLIC1, SCN3A, CACNG4, ATP6V1F, CACNG5, CHRNB2, SLC38A1, GRID2, ATP6V0B, ATP6V0E1, KCNJ8, KCNH7, KCNB1, KCND3, KCNJ9, KCNH8, TRPV3, CACNA2D2, PKDREJ, ATP5J2, SLC8A3, P2RX7, SCN8A, FAM26F, KCTD16	907	642	20581	1.6612003558339945	0.2984762435344932	0.0208442	0.01980941562970238
KEGG_PATHWAY	hsa04260:Cardiac muscle contraction	12	1.2806830309498398	7.936959636889585E-4	COX7B, COX7A2L, UQCRQ, CACNA2D2, COX7A2, UQCR11, UQCR10, COX5B, COX6A1, COX7C, CACNG4, CACNG5	330	75	6879	3.335272727272727	0.17547242994203904	0.0275526	0.02698566276542459
UP_KEYWORDS	Cytoskeleton	73	7.790821771611527	0.0012501355564360987	FHOD3, SPEF1, NUMA1, CETN2, MAST1, KIF14, CIB1, SNX10, CHD3, KIF11, BRCA2, SYNE2, SYNE1, UXT, TUBA1C, MAP1LC3A, HERC2, KIF5C, GSG2, TUBB1, KIF13A, KIF1B, KIF21B, KIF1A, GTSE1, TMSB10, TRIM67, APC2, RPS7, DYNLT1, NAV1, SHROOM4, MTSS1, SEPT3, DNM3, ASPM, KIF9, SYNPO2L, INCENP, KIFC1, TMEM216, TNIK, MAPT, S100A8, BRSK2, DNAH8, EPB41, WDR62, AIF1, ADD2, RPS3, WASF1, SPTBN2, DNAH10, SPAG5, CEP152, XRC…	907	1138	20581	1.455592414398459	0.41088752631525416	0.0283702	0.026961765318850688
UP_KEYWORDS	Ion channel	30	3.2017075773745995	0.0012743122911894602	RYR1, HCN3, SLC26A1, TMEM63C, CHRNA4, KCNA2, KCNA3, CACNA1G, GABRR2, KCNN3, LRRC8B, CLIC1, SCN3A, CACNG4, CACNG5, CHRNB2, GRID2, KCNJ8, KCNH7, KCNB1, KCND3, KCNJ9, KCNH8, TRPV3, CACNA2D2, PKDREJ, P2RX7, SCN8A, FAM26F, KCTD16	907	359	20581	1.8962080752304118	0.4168890722311924	0.0283702	0.026961765318850688
UP_KEYWORDS	Mental retardation	26	2.774813233724653	0.0016643737610871749	SETD5, WDR62, HNMT, C12ORF57, ZNF81, HERC2, KIF1A, SOX5, CDKL5, CEP152, ZBTB16, SOX11, ARID1A, SHROOM4, SMARCA4, PAX1, MED13L, ASPM, ZEB2, NIN, CENPJ, SCN8A, IL1RAPL1, ZNF711, AHDC1, BRWD3	907	299	20581	1.9731556492977327	0.50570196621475	0.0335252	0.03186086914081163
UP_KEYWORDS	Neurogenesis	23	2.454642475987193	0.001625835188744164	SEMA6C, SEMA5B, BRSK2, DSCAM, DYX1C1, DYNLT1, SEMA3D, SDC2, NAV1, SOX11, WDR62, ARID1A, MYT1, POU3F3, SMARCA4, CIT, NME1, ATCAY, PLXNB3, TNIK, IGSF9B, DSCAML1, EPHB1	907	250	20581	2.087598676957001	0.4975644761200574	0.0335252	0.03186086914081163
GOTERM_MF_DIRECT	GO:0004129~cytochrome-c oxidase activity	8	0.8537886872998933	3.672429194173202E-4	SURF1, COX7B, COX7A2L, NDUFA4, COX7A2, COX5B, COX6A1, COX7C	787	30	16881	5.7199491740787805	0.2606095317967635	0.0335415	0.03333749612932784
UP_KEYWORDS	Meckel syndrome	5	0.5336179295624333	0.0019387526483805844	TMEM216, KIF14, B9D1, B9D2, TMEM231	907	13	20581	8.727419218047663	0.5599594412757982	0.0372769	0.03542629839313614
UP_KEYWORDS	Voltage-gated channel	16	1.7075773745997866	0.002588521388564028	HCN3, KCNJ8, KCNB1, KCND3, KCNJ9, KCNH7, KCNH8, KCNA2, KCNA3, CACNA2D2, CACNA1G, SCN8A, CLIC1, SCN3A, CACNG4, CACNG5	907	150	20581	2.4204042631385523	0.6659164412339909	0.0476063	0.04524285209577127
UP_KEYWORDS	Chromosomal rearrangement	27	2.88153681963714	0.0036273558126272767	DOCK3, HIP1, MAML2, SATB1, LMNB1, KIAA1549, ZNF81, CCND1, BCL7A, EP300, WHSC1, BRD3, BCAS4, CDKL5, DYX1C1, ZBTB16, TET1, MLF1, SHROOM4, MED13L, BCR, MN1, OBSCN, ASXL2, LHX4, HIST1H4J, BRWD3	907	334	20581	1.8343258356495387	0.7850094300283454	0.0639321	0.06075820986150689
GOTERM_CC_DIRECT	GO:0036038~MKS complex	5	0.5336179295624333	0.0016773348747821716	TMEM17, TMEM216, B9D1, B9D2, TMEM231	845	12	18224	8.986193293885602	0.6184825096290175	0.0740608	0.07264150265402788
GOTERM_MF_DIRECT	GO:0005509~calcium ion binding	53	5.656350053361793	0.0010525772279791578	RYR1, CETN2, PCDH11X, CIB1, ATP2A1, CELSR3, HPGDS, EFEMP1, EYS, ANXA2, ANXA4, MYL6, PLCB4, CDHR1, S100A6, S100A4, MASP2, S100A8, FBN3, MEGF6, NOTCH1, C1S, CAPSL, PCDH15, SRI, NID1, AIF1, DLL1, NKD1, MYL12B, TTN, SCUBE3, CLEC3B, S100A13, RHBDL3, S100A11, S100A10, MGMT, PCDHGC4, EDEM2, PCDHB15, MYO5A, PKDREJ, S100B, PCDHGA11, MEX3B, NIN, SMOC1, MGP, NDUFAB1, ANXA2P2, PLCH2, TPT1	787	717	16881	1.5855507647812517	0.5792322060667299	0.0865218	0.08599555952589719
KEGG_PATHWAY	hsa05323:Rheumatoid arthritis	12	1.2806830309498398	0.002981985894747742	HLA-DMA, ATP6V0B, ATP6V0E1, HLA-DMB, IL15, TNFSF13, IL18, HLA-DRA, CCL2, ATP6V0A4, HLA-DRB1, ATP6V1F	330	88	6879	2.8425619834710742	0.516016823527055	0.0905778	0.08871408036874533
UP_SEQ_FEATURE	compositionally biased region:Poly-Gln	20	2.134471718249733	7.767404685384607E-5	MAGI1, NCOA2, NOTCH1, MAML2, SATB1, USP54, EAF2, TCF20, PROX1, ARID1A, NKPD1, MN1, OBSCN, SALL3, MED31, EP300, KCNN3, GLCCI1, SOCS7, MAMLD1	904	156	20063	2.8453312911277515	0.1922755032258876	0.106802	0.10676297740061141
GOTERM_CC_DIRECT	GO:0005874~microtubule	27	2.88153681963714	0.002745503636833561	DNAH8, KIF14, KIF11, TUBA1C, MAP1LC3A, KIF5C, TUBB1, KIF13A, KIF1B, KIF21B, KIF1A, APC2, DNAH10, NAV1, MT3, DNM3, SLC8A3, CENPE, KIF9, KIF18B, KIF4B, INCENP, KIF26A, KIFC1, KIF4A, CENPJ, MAPT	845	311	18224	1.8723643904944918	0.7936303707186075	0.112566	0.11040846768123534
GOTERM_CC_DIRECT	GO:0005746~mitochondrial respiratory chain	5	0.5336179295624333	0.0031496308022162223	SURF1, COX7B, NDUFA13, COX7A2L, COX7A2	845	14	18224	7.702451394759087	0.836467112618934	0.120526	0.11821614277651554
UP_KEYWORDS	Calmodulin-binding	15	1.6008537886872998	0.0073088234752808874	RYR1, EPB41, MYO5A, ADCY1, IQGAP3, TTN, ADD2, SLC8A3, ASPM, REM1, OBSCN, SPATA17, STRN, KCNN3, NOS1	907	152	20581	2.239272036209598	0.9550851040810858	0.123665	0.11752588148251666
UP_KEYWORDS	ATP-binding	81	8.64461045891142	0.008213320153996562	DGKD, SRXN1, MAST1, CHD7, KIF14, AATK, ATP2A1, CHD3, KIF11, CHTF18, MKI67, CCT6B, KIF5C, GSG2, AKT3, KIF13A, KIF1B, KIF21B, KIF1A, MAP3K9, EPHB1, MAGI1, PDGFRA, CDKL5, ABCC2, IPMK, NME2, LMTK2, CSNK1E, SYN3, NME1, CIT, ERN1, BCR, KIF9, OBSCN, KIFC1, SCN8A, MSH5, TSSK3, TNIK, RAD54L2, DGKI, RBKS, SLC27A5, DGKH, BRSK2, DNAH8, ATP10B, MST1R, ADCY1, PKMYT1, TTBK1, TTN, ADCY5, RECQL4, BRIP1, RAD54L, M…	907	1391	20581	1.321347582545534	0.969455802066082	0.133624	0.12699056545794685
UP_KEYWORDS	Primary microcephaly	5	0.5336179295624333	0.010280899537384737	ASPM, CENPE, CEP152, CENPJ, WDR62	907	20	20581	5.672822491730981	0.9873655719696037	0.161067	0.15307117088995054
UP_KEYWORDS	Sushi	8	0.8537886872998933	0.011096363863501433	C1S, HP, C4BPA, MASP2, SUSD5, CSMD3, CSMD2, CSMD1	907	56	20581	3.241612852417704	0.9910848038302769	0.167634	0.15931208118312773
GOTERM_MF_DIRECT	GO:0019843~rRNA binding	8	0.8537886872998933	0.0022445282807017617	MRPS15, EMG1, RPS9, RPS18, RPS5, RPS11, RPL9, MRPL11	787	40	16881	4.289961880559085	0.8423023883682628	0.167727	0.16670723684848537
UP_KEYWORDS	Calcium	54	5.76307363927428	0.011882018269075709	RYR1, CETN2, PCDH11X, CIB1, ATP2A1, ITGAE, CELSR3, HPGDS, EFEMP1, EYS, ANXA2, ANXA4, CACNA2D2, SYN3, PLCB4, CDHR1, S100A6, S100A4, MASP2, TLCD1, S100A8, FBN3, MEGF6, NOTCH1, C1S, CAPSL, TMEM63C, COL11A1, COL11A2, PCDH15, NRXN2, SRI, NID1, AIF1, NKD1, CACNA1G, MYL12B, TTN, SCUBE3, S100A13, S100A11, CACNG4, CACNG5, PCDHGC4, PCDHB15, TRPV3, S100B, SLC8A3, MFAP4, PCDHGA11, SMOC1, ANXA2P2, PLCH2, TPT1	907	877	20581	1.3971831906657832	0.9936302334382907	0.173314	0.16470935669546327
UP_KEYWORDS	Nucleotide-binding	99	10.56563500533618	0.01383810729043146	RAB3B, DGKD, GIMAP2, MKI67, CCT6B, KIF5C, AKT3, TUBB1, KIF21B, MAP3K9, EPHB1, MAGI1, ARL10, PDGFRA, GUCY1A2, CDKL5, IPMK, LMTK2, CSNK1E, ERN1, BCR, RAB32, OBSCN, RAB34, SCN8A, MSH5, TSSK3, TNIK, RAD54L2, DGKI, SLC27A5, DGKH, BRSK2, SAR1B, AGAP2, MST1R, PKMYT1, TTBK1, BRIP1, RRAS, MDN1, ABCA2, DNAH10, TNK2, MYO5A, MTHFS, SMARCA4, ICK, KIF18B, KIF4B, KIF4A, WNK2, WNK3, SRXN1, CHD7, MAST1, KIF14, AA…	907	1788	20581	1.2563969276988078	0.9972451650740026	0.195117	0.18543063769178159
COG_ONTOLOGY	Cell division and chromosome partitioning	11	1.1739594450373532	0.010438574190302797	APC2, CENPE, CCDC144B, KIF5C, KIF4B, KIF4A, KIF13A, MAPK8IP3, CCDC144A, SYNE1, CIT	77	117	2026	2.4737484737484734	0.18075764781477932	0.198333	0.19833290961575314
UP_SEQ_FEATURE	compositionally biased region:Ser-rich	38	4.055496264674493	2.1696506786788805E-4	ANKRD13B, SETD5, DOCK3, CSRNP3, TSHZ1, TCF20, ZCCHC14, TTN, SYNE1, NEURL1B, KIAA1549, MUC12, TNRC18, EIF4EBP3, MAP3K9, FNIP2, NCKAP5, BAHCC1, TBC1D16, BRD3, SRRM2, SPEN, PLEKHG3, APC2, PDGFRA, KCNH8, CCDC136, CBX2, EAF2, NBEAL1, MTSS1L, PRG4, KRT10, MYT1, MTSS1, MED13L, TAOK1, ASXL2	904	441	20063	1.9123723235606929	0.449265085179233	0.198885	0.19881232385627476
GOTERM_CC_DIRECT	GO:0030670~phagocytic vesicle membrane	9	0.96051227321238	0.0055986757174851815	RAB32, ATP6V0B, ATP6V0E1, RAB34, ATP6V0A4, CYBA, B2M, RILP, RAB9B	845	59	18224	3.28986059572761	0.9601514652897818	0.200852	0.19700340180900983
UP_KEYWORDS	Chromatin regulator	22	2.3479188900747063	0.015952326953009893	BRD3, KDM6B, CBX6, KDM4B, USP49, SATB1, UHRF1, CBX2, CHD7, DOT1L, DPY30, TET1, CHD3, ARID1A, SMARCA4, RNF168, CECR2, GSG2, TET3, BCOR, WHSC1, JARID2	907	287	20581	1.739402018370475	0.9988887118670333	0.217672	0.206865659197096
GOTERM_CC_DIRECT	GO:0043197~dendritic spine	12	1.2806830309498398	0.0065295182471242835	SLC8A3, DNM3, GRID2, CTTNBP2, RGS10, HIP1R, LRRC4, CRIPT, STRN, NOS1, MT3, DGKI	845	100	18224	2.588023668639053	0.9767216871947334	0.220467	0.2162422807724101
UP_KEYWORDS	Phosphopantetheine	3	0.32017075773745995	0.017712773224921635	FASN, NDUFAB1, ALDH1L2	907	5	20581	13.614773980154355	0.9994789443504725	0.227046	0.21577378292177263
UP_KEYWORDS	Stickler syndrome	3	0.32017075773745995	0.017712773224921635	COL11A1, COL11A2, COL9A1	907	5	20581	13.614773980154355	0.9994789443504725	0.227046	0.21577378292177263
GOTERM_BP_DIRECT	GO:0002503~peptide antigen assembly with MHC class II protein complex	4	0.42689434364994666	0.001043116832995655	HLA-DMA, HLA-DMB, HLA-DRA, HLA-DRB1	812	5	16792	16.54384236453202	0.9511651957931166	0.232134	0.23149169716865114
UP_KEYWORDS	Actin-binding	21	2.2411953041622197	0.018791380755261797	FHOD3, HIP1, EPB41, HIP1R, MICAL3, MYO5A, DSTN, MTSS1L, AIF1, SHROOM4, SYNE2, MTSS1, SYNE1, ADD2, SYNPO2L, ARPC3, CAPZA2, PHACTR1, WASF1, TMSB10, SPTBN2	907	274	20581	1.739113464618257	0.9996726193804083	0.232787	0.2212302017509569
UP_KEYWORDS	Membrane	361	38.52721451440768	0.01926133597334202	IFI27L2, VPS29, SCOC, TMEM183A, LST1, XYLT1, ICAM4, RPL9, GPR173, RPS14, AKT3, MYB, VSTM1, SPA17, EPHB1, GPR179, CDON, ARL10, ATP6V0E1, ALG5, CACNA2D2, BCR, COX7A2L, GPR160, TMEM126B, KCTD16, SLC45A2, TMEM63C, SAR1B, EPB41, MGST3, SDC2, IL20RA, LYPD1, PCDH15, ATP5J, MGST2, LPAR2, ATP5I, ATP5H, MST1R, ATP5O, ATP5L, CYB5R1, GNG10, NEU4, FAM171A2, RRAS, BLOC1S1, ATP5E, TSPAN6, FLRT1, B4GALNT1, ATP6V…	907	7494	20581	1.0930818892526737	0.9997326718904412	0.232787	0.2212302017509569
UP_KEYWORDS	Cell adhesion	32	3.4151547491995733	0.021236656400158135	CSTA, NLGN2, PTPRS, PCDH11X, PCDH15, ADAM22, NRXN2, CIB1, ICAM4, ITGAE, NID1, COL19A1, ARVCF, EFS, FLRT1, TNR, NCAM1, IGFBP7, EPHB1, OPCML, DSCAM, PCDHGC4, LSAMP, PCDHB15, MFAP4, PCDHGA11, CDHR1, CNTN3, IGSF9B, DSCAML1, CNTNAP5, ADA	907	479	20581	1.515910811986567	0.9998860628468346	0.246155	0.23393424669478766
UP_KEYWORDS	Innate immunity	20	2.134471718249733	0.022113187498512266	C1QA, APOBEC3G, C1S, LY86, LY96, C4BPA, MST1R, LILRA5, CLEC4A, PYCARD, LGALS3, SLPI, CASP4, TLR9, MASP2, TNFAIP8L2, FCGR1A, CD244, S100A8, SERINC5	907	261	20581	1.7387961660478102	0.9999220038231278	0.246155	0.23393424669478766
UP_KEYWORDS	Immunity	33	3.5218783351120595	0.021998325595771296	C1QA, C1S, LST1, HP, LY96, C4BPA, TNFRSF13C, MST1R, LILRA5, PYCARD, LGALS3, HLA-DMA, HLA-DMB, CASP4, VSTM1, TNFAIP8L2, FCGR1A, FCGR1B, B2M, APOBEC3G, TNFSF13, LY86, MARCH8, PSMB8, CLEC4A, SLPI, TLR9, HLA-DRA, MASP2, S100A8, SERINC5, CD244, HLA-DRB1	907	500	20581	1.4976251378169791	0.9999180309138397	0.246155	0.23393424669478766
UP_KEYWORDS	Hydroxylation	10	1.0672358591248665	0.0240188112007138	C1QA, NOTCH1, C1S, COL11A1, RPL27A, COL11A2, COL9A1, MASP2, COL19A1, CELSR3	907	95	20581	2.388556838623571	0.9999658231430559	0.260512	0.2475785154535115
UP_KEYWORDS	Immunoglobulin domain	35	3.7353255069370332	0.026224310863508182	PTPRS, WFIKKN1, SEMA3D, LRRC4, TREM2, ICAM4, TTN, LILRA5, HLA-DMA, HLA-DMB, GPA33, VSTM1, NCAM1, IGFBP7, CD58, FCGR1A, FCGR1B, B2M, OPCML, CDON, BTNL9, PDGFRA, LINGO3, DSCAM, LSAMP, PTPRD, OBSCN, LRIT2, IL1RAPL1, CD48, CNTN3, LRRN1, IGSF9B, DSCAML1, CD244	907	546	20581	1.4545698696746105	0.9999868741777964	0.264116	0.2510041182650069
UP_KEYWORDS	Serine/threonine-protein kinase	27	2.88153681963714	0.025713818319097533	BRSK2, MAST1, AATK, PKMYT1, TTBK1, TTN, GSG2, AKT3, MAP3K9, MAP4K5, CDKL5, TNK2, LMTK2, CSNK1E, ACVR2B, HIPK2, CIT, ICK, ERN1, BCR, OBSCN, SBK1, TAOK1, WNK2, WNK3, TSSK3, TNIK	907	393	20581	1.5589435855138576	0.999983616462354	0.264116	0.2510041182650069
UP_KEYWORDS	Diamond-Blackfan anemia	4	0.42689434364994666	0.026028365347916766	RPS7, RPS19, RPS29, RPS10	907	15	20581	6.051010657846381	0.9999857081423765	0.264116	0.2510041182650069
GOTERM_BP_DIRECT	GO:0030705~cytoskeleton-dependent intracellular transport	6	0.6403415154749199	0.0013136773172556977	TUBA1C, KIF5C, KIF26A, KIF13A, KIF14, KIF1B	812	18	16792	6.893267651888341	0.9776955030035294	0.271462	0.27071136144876345
KEGG_PATHWAY	hsa04145:Phagosome	15	1.6008537886872998	0.012296017372976208	ATP6V0B, ATP6V0E1, NCF4, CYBA, TUBA1C, HLA-DMA, HLA-DMB, TUBB1, HLA-DRA, ATP6V0A4, NOS1, FCGR1A, RILP, HLA-DRB1, ATP6V1F	330	150	6879	2.084545454545455	0.9505332247200822	0.283416	0.2775848493233565
KEGG_PATHWAY	hsa05310:Asthma	6	0.6403415154749199	0.01289699676369249	HLA-DMA, HLA-DMB, FCER1G, HLA-DRA, RNASE3, HLA-DRB1	330	30	6879	4.169090909090909	0.9573340915286767	0.283416	0.2775848493233565
KEGG_PATHWAY	hsa05150:Staphylococcus aureus infection	8	0.8537886872998933	0.013728527309959576	C1QA, HLA-DMA, HLA-DMB, C1S, HLA-DRA, MASP2, FCGR1A, HLA-DRB1	330	54	6879	3.0882154882154884	0.9652349708098797	0.283416	0.2775848493233565
KEGG_PATHWAY	hsa01100:Metabolic pathways	75	8.004268943436498	0.013995874755799487	NDUFA13, COX7B, GAL3ST1, DGKD, GALNT13, NDUFA11, XYLT1, ATP5G3, COX6A1, ATP5G1, SAT1, COX7C, HPGDS, REV3L, NOS1, POLE, ATP6V0B, ATP6V0E1, HMGCS1, ALG5, IPMK, NME2, NDUFC1, CMBL, NME5, SDHD, ATP5J2, NME1, DPM3, PLCB4, DGKI, SLC27A5, DGKH, NDUFB9, AHCY, NDUFB7, NDUFB6, NDUFB5, NDUFB3, NDUFB2, ATP5J, NDUFB1, ATP5I, UQCR11, UQCR10, ATP5H, ATP5O, COX5B, HSD17B8, PTS, ATP5L, AGPAT4, FUT9, PPCS, ATP5E, …	330	1219	6879	1.282534118875382	0.9674514337415557	0.283416	0.2775848493233565
GOTERM_BP_DIRECT	GO:0019886~antigen processing and presentation of exogenous peptide antigen via MHC class II	13	1.3874066168623265	0.001541980304422345	FCER1G, SAR1B, KIF11, CENPE, HLA-DMA, HLA-DMB, KIF26A, KIF4B, KIF4A, HLA-DRA, RILP, HLA-DRB1, SPTBN2	812	92	16792	2.922146069822232	0.9884883062008464	0.297397	0.2965742118838977
SMART	SM01394:SM01394	7	0.7470651013874066	0.001892838167539815	S100A6, S100A13, S100A4, S100B, S100A8, S100A11, S100A10	488	28	10057	5.152151639344262	0.45976732418401967	0.307586	0.30758620222521993
GOTERM_CC_DIRECT	GO:0045202~synapse	17	1.814300960512273	0.010087848156757409	HCN3, GRID2, NLGN2, DSCAM, PCDH15, SHISA7, SEPT3, GABRR2, ATCAY, PDZD11, CCL2, DLGAP1, PHACTR1, NOS1, WASF1, DSCAML1, DGKI	845	181	18224	2.0256170518813956	0.9970318880153035	0.32169	0.3155254729030234
UP_KEYWORDS	Disulfide bond	173	18.463180362860193	0.034052442141057564	SEMA5B, GALNT13, GPR65, HP, XYLT1, ICAM4, C4BPA, CXCL14, BACH2, CELSR3, TXNDC17, CHCHD5, GPR173, LGALS3, EFEMP1, AKT3, TNR, VSTM1, B2M, EYS, TECTA, CDON, CHRNB2, SEMA6C, PDGFRA, DSCAM, IGFBP3, CMC1, CACNA2D2, RNASE3, RNASE2, ERN1, CLEC4A, PROCR, SFRP1, AZGP1, OBSCN, TYROBP, SLPI, SCG5, MASP2, FBN3, NOTCH1, CHRNA4, IL20RA, PCDH15, LY96, TNFRSF11B, MST1R, NID1, SCUBE3, PRDX4, FLRT1, B4GALNT1, IGFBP…	907	3434	20581	1.1431546780075243	0.9999995681318724	0.334981	0.3183507381559335
UP_KEYWORDS	MHC II	4	0.42689434364994666	0.036453341534308875	HLA-DMA, HLA-DMB, HLA-DRA, HLA-DRB1	907	17	20581	5.339127051040924	0.9999998492792332	0.350449	0.3330509840180038
GOTERM_CC_DIRECT	GO:0009986~cell surface	38	4.055496264674493	0.01224741741933958	CD63, NLGN2, NOTCH1, SDC2, LPAR2, MST1R, PKD1, SCUBE3, HLA-DMA, LGALS1, GPA33, LRRTM1, TNR, NCAM1, CD58, NDP, PROM2, ABCC2, FCER1G, ANXA2, IL15, ANXA4, LAYN, TSHR, IGF2R, PROCR, SFRP1, TYROBP, IL1RAPL1, PLXNB3, FAS, HLA-DRA, RAMP1, VAMP5, DSCAML1, HCST, ADA, HLA-DRB1	845	542	18224	1.5120679490818576	0.9991526715333777	0.370001	0.362910316162536
GOTERM_BP_DIRECT	GO:0006123~mitochondrial electron transport, cytochrome c to oxygen	6	0.6403415154749199	0.002193684937966678	COX7B, COX7A2L, NDUFA4, COX5B, COX6A1, COX7C	812	20	16792	6.203940886699507	0.9982590104964801	0.396646	0.3955488153771166
GOTERM_BP_DIRECT	GO:1902600~hydrogen ion transmembrane transport	10	1.0672358591248665	0.002483260448057768	SURF1, COX7B, COX7A2L, UQCRQ, NDUFA4, COX7A2, UQCR11, UQCR10, COX6A1, COX7C	812	61	16792	3.390131632076234	0.999248175194349	0.403625	0.4025091394178412
GOTERM_BP_DIRECT	GO:0070126~mitochondrial translational termination	12	1.2806830309498398	0.0027903579855656237	MRPS28, MRPS15, MRPS36, MRPS33, MRPS23, MRPS12, MRPL34, MRPL13, MRPL54, MRPL33, MRPL22, MRPL11	812	86	16792	2.8855539007904683	0.9996915001613385	0.403625	0.4025091394178412
GOTERM_BP_DIRECT	GO:0034765~regulation of ion transmembrane transport	14	1.4941302027748131	0.002681249593303966	HCN3, KCNJ8, KCNB1, KCND3, KCNJ9, KCNH7, KCNH8, KCNA2, KCNA3, CACNA2D2, CACNA1G, SCN8A, CLIC1, SCN3A	812	111	16792	2.6082634358496426	0.9995766336725723	0.403625	0.4025091394178412
GOTERM_BP_DIRECT	GO:0070125~mitochondrial translational elongation	12	1.2806830309498398	0.0025416295728717957	MRPS28, MRPS15, MRPS36, MRPS33, MRPS23, MRPS12, MRPL34, MRPL13, MRPL54, MRPL33, MRPL22, MRPL11	812	85	16792	2.9195015937409443	0.9993652595833257	0.403625	0.4025091394178412
GOTERM_MF_DIRECT	GO:0097110~scaffold protein binding	8	0.8537886872998933	0.006429659458093469	GRID2, CRIPT, TREM2, NOS1, DLL1, CACNA1G, CIT, ADCY5	787	48	16881	3.5749682337992374	0.9950195957288888	0.406552	0.40407936748172035
GOTERM_MF_DIRECT	GO:0046961~proton-transporting ATPase activity, rotational mechanism	6	0.6403415154749199	0.006287543526765469	ATP6V0B, ATP6V0E1, ATP5EP2, ATP5E, ATP6V0A4, ATP6V1F	787	26	16881	4.949956016029714	0.9943982563059041	0.406552	0.40407936748172035
GOTERM_BP_DIRECT	GO:0043086~negative regulation of catalytic activity	11	1.1739594450373532	0.0031483461012460187	NQO1, NOTCH1, ANXA2, IL7, ANXA4, APOC2, SCG5, LMTK2, PHACTR1, ANXA2P2, FNIP2	812	75	16792	3.0330377668308706	0.9998908222493549	0.433722	0.43252278581403636
KEGG_PATHWAY	hsa04672:Intestinal immune network for IgA production	7	0.7470651013874066	0.02347254297101147	HLA-DMA, HLA-DMB, IL15, TNFSF13, HLA-DRA, TNFRSF13C, HLA-DRB1	330	47	6879	3.1046421663442945	0.9968859649095526	0.438756	0.4297280943923638
UP_KEYWORDS	Disease mutation	130	13.874066168623267	0.04846320714182794	ISCA2, NCF4, HP, XYLT1, HNMT, ATCAY, EFEMP1, ZNF81, HERC2, RPS19, KIF5C, AKT3, TUBB1, EP300, SBF1, B2M, EYS, TECTA, GPR179, CDON, CHRNB2, CDKL5, SOX11, CYBA, SDHD, SOX10, DPM3, MYCN, RBP3, BOLA3, ETHE1, SCN8A, SNRPE, MASP2, FTL, SLC45A2, NOTCH1, CHRNA4, SAR1B, SLC1A1, PCDH15, TNFRSF11B, WDR62, CACNA1G, C12ORF57, BRIP1, EMG1, ATP5E, B4GALNT1, ATP6V0A4, NDP, SPTBN2, SURF1, ZBTB16, PTCH1, CBX2, TRPV…	907	2550	20581	1.1568108610588668	0.9999999992517913	0.455554	0.4329379838003296
INTERPRO	IPR013098:Immunoglobulin I-set	17	1.814300960512273	9.374202641039783E-4	PDGFRA, PTPRS, LINGO3, DSCAM, LRRC4, LSAMP, TTN, PTPRD, OBSCN, LRRN1, IGFBP7, CNTN3, NCAM1, IGSF9B, DSCAML1, OPCML, CDON	870	141	18559	2.5719654357218555	0.7476096440763141	0.458711	0.45871098256821335
GOTERM_CC_DIRECT	GO:0005737~cytoplasm	271	28.922091782283886	0.016340750475898495	VPS29, RPL34, LST1, ICAM4, MKI67, RPL9, BACH2, CCT6B, UXT, RPS14, LGALS3, HERC2, LGALS1, RPS19, DPYSL4, ZMIZ1, AKT3, RPL36, RPL35, SOX8, FBXO6, ROPN1L, KIF21B, RPS11, SPA17, B2M, SKP1, GABARAPL2, KRT7, SOX11, CSNK1E, MAPK8IP3, SULT2B1, SPATA17, ETHE1, PSME1, RPL24, PIH1D2, HOXB7, PRR11, CAPSL, EPB41, PCDH15, WDR61, DAZ1, ATP5H, TTBK1, C12ORF57, BRIP1, COMMD8, FLRT1, S100A13, TNRC18, KCNN3, SCN3A,…	845	5222	18224	1.119230202670087	0.9999218648675516	0.46898	0.45999212589654265
UP_SEQ_FEATURE	repeat:LRR 10	15	1.6008537886872998	7.190394278307567E-4	DNAH10, LINGO3, LRRN4, LRRIQ1, DCN, SYNE2, CENPE, SLITRK1, LRRTM1, FLRT1, TLR9, LRRN1, LRRC8B, LGR6, LGR5	904	116	20063	2.869860009154715	0.8615644450370168	0.480058	0.4798836135629773
UP_SEQ_FEATURE	repeat:LRR 9	16	1.7075773745997866	0.0010399101777052787	DNAH10, LINGO3, LRRN4, LRRIQ1, LRRC4, DCN, SYNE2, CENPE, SLITRK1, LRRTM1, FLRT1, TLR9, LRRN1, LRRC8B, LGR6, LGR5	904	134	20063	2.6499801875577864	0.9427427216691822	0.480058	0.4798836135629773
UP_SEQ_FEATURE	repeat:LRR 8	17	1.814300960512273	0.001047399665834072	DNAH10, LINGO3, LRRN4, LRRIQ1, LRRC4, LRRC10, DCN, SYNE2, CENPE, SLITRK1, LRRTM1, FLRT1, TLR9, LRRN1, LRRC8B, LGR6, LGR5	904	148	20063	2.5492630351590533	0.9439107229652758	0.480058	0.4798836135629773
GOTERM_CC_DIRECT	GO:0005751~mitochondrial respiratory chain complex IV	4	0.42689434364994666	0.019983279775364644	NDUFA4, COX5B, COX6A1, COX7C	845	13	18224	6.635958124715522	0.9999907098959907	0.521382	0.5113902960695588
GOTERM_CC_DIRECT	GO:0016529~sarcoplasmic reticulum	6	0.6403415154749199	0.019208033683620587	RYR1, HAX1, ATP2A1, NOS1, SRI, SYNE2	845	34	18224	3.8059171597633137	0.9999853734961939	0.521382	0.5113902960695588
GOTERM_CC_DIRECT	GO:0030018~Z disc	12	1.2806830309498398	0.02098849193412236	RYR1, FHOD3, OBSCN, SYNPO2L, SCN8A, NOS1, SRI, FBXO22, MURC, SYNE2, MYL12B, TTN	845	118	18224	2.19324039715174	0.9999948453948516	0.5238	0.5137617808222126
SMART	SM00408:IGc2	23	2.454642475987193	0.004854212821057118	PDGFRA, PTPRS, LINGO3, DSCAM, WFIKKN1, LRRC4, LSAMP, TTN, LILRA5, PTPRD, OBSCN, LRIT2, GPA33, IL1RAPL1, LRRN1, CNTN3, NCAM1, IGSF9B, FCGR1A, FCGR1B, DSCAML1, OPCML, CDON	488	250	10057	1.8959918032786884	0.794325540337539	0.525873	0.5258730556145211
UP_KEYWORDS	Signal	203	21.66488794023479	0.06091078348338185	IFI27L2, LST1, C4BPA, ICAM4, VSTM1, B2M, EPHB1, EYS, GPR179, CDON, CACNA2D2, SOX11, RNASE3, RNASE2, AZGP1, SFRP1, SLPI, RBP3, SDC2, IL20RA, LYPD1, PCDH15, MST1R, FAM171A2, PRDX4, FLRT1, B4GALNT1, PROM2, EDEM2, LRRN4, PRG4, GDF3, PCDHGA11, COL9A1, LRRN1, IGSF9B, HAMP, HLA-DRB1, PTPRS, WFIKKN1, LRRC4, MAGT1, WFDC2, WFDC3, GABRR2, VMO1, MUC12, CTSH, RNF150, CTBS, MRPS28, ATP6V0B, FCER1G, EDN2, IL15,…	907	4160	20581	1.1072913132897972	0.999999999997149	0.546964	0.5198097972265123
UP_KEYWORDS	EGF-like domain	17	1.814300960512273	0.06088599468428342	FBN3, MEGF6, NOTCH1, C1S, MEGF11, ADAM22, NRXN2, NID1, DLL1, CELSR3, SCUBE3, EFEMP1, MUC12, TNR, MASP2, EYS, CNTNAP5	907	238	20581	1.6208064262088517	0.999999999997117	0.546964	0.5198097972265123
UP_KEYWORDS	DNA damage	23	2.454642475987193	0.06219887819066555	POLQ, MDC1, ATAD5, UHRF1, MGMT, CETN2, XRCC2, FOXM1, BRCA2, HIPK2, RBX1, RNF168, BRIP1, HERC2, CCND1, TAOK1, RPS3, REV3L, RAD54L, FBXO6, CLSPN, FNIP2, POLE	907	352	20581	1.4826695148842337	0.9999999999984047	0.546964	0.5198097972265123
UP_KEYWORDS	Proteoglycan	6	0.6403415154749199	0.06335990065696295	SRGN, SDC2, TNR, GPC2, PRG4, DCN	907	49	20581	2.7785253020723175	0.9999999999990553	0.546964	0.5198097972265123
GOTERM_BP_DIRECT	GO:0045662~negative regulation of myoblast differentiation	6	0.6403415154749199	0.004222404177956311	NOTCH1, IL18, SOX8, GDF3, DLL1, CXCL14	812	23	16792	5.394731205825659	0.9999951729610047	0.555246	0.5537107297001799
GOTERM_CC_DIRECT	GO:0005615~extracellular space	79	8.431163287086447	0.023340598202234896	HP, ICAM4, C4BPA, NENF, ELFN2, CXCL14, WFDC2, LGALS3, EFEMP1, LGALS1, MCF2L, CTSH, VSTM1, TNFSF12-TNFSF13, RPL39, CLIC1, B2M, CTBS, SRGN, EDN2, ANXA2, IL15, IGFBP3, IL18, RNASE3, DCN, SFRP1, AZGP1, SLPI, RBP3, S100A4, DSCAML1, S100A8, CD63, CSTA, NLGN2, SEMA3D, PCDH15, LY96, TNFRSF11B, CST6, CLEC3B, PRDX4, CCL7, BLOC1S1, FLRT1, S100A13, CCL2, GPC2, IGFBP7, IGFBP6, NDP, PLTP, S100A11, SPTBN2, TIMM…	845	1347	18224	1.264871750943363	0.9999987041355453	0.558229	0.547531532827427
GOTERM_CC_DIRECT	GO:0015934~large ribosomal subunit	4	0.42689434364994666	0.024574274950285423	RPL27A, RPL13A, RPL26L1, MRPL22	845	14	18224	6.161961115807269	0.9999993727022365	0.560197	0.549461663942574
GOTERM_CC_DIRECT	GO:0005925~focal adhesion	28	2.9882604055496262	0.02537478376999454	MDC1, RPL9, SYNE2, RPS14, RPS19, RRAS, RPS18, FLRT1, RPS3, WASF1, RPS11, B2M, RPS10, RPS13, RPS9, RPS7, RPS5, NME2, LAYN, RPL13A, RPS3A, CYBA, IGF2R, PROCR, RPS29, ARPC3, RPL27, LIMS2	845	391	18224	1.5444301517880115	0.9999996084317991	0.560197	0.549461663942574
SMART	SM00369:LRR_TYP	17	1.814300960512273	0.012527380797924662	LINGO3, LRRN4, LRRIQ1, LRRC4, LRRC10, ELFN2, PKD1, DCN, LRIT2, SLITRK1, LRRTM1, FLRT1, TLR9, LRRN1, LRRC8B, LGR6, LGR5	488	178	10057	1.9682377049180326	0.9833794557601643	0.563868	0.5638684544839684
SMART	SM00630:Sema	6	0.6403415154749199	0.015614818739556046	SEMA6C, SEMA5B, SEMA3D, PLXNB3, MST1R, PLXNA3	488	31	10057	3.988762559492332	0.9939931488329634	0.563868	0.5638684544839684
SMART	SM00060:FN3	15	1.6008537886872998	0.01390541766653482	PTPRS, DSCAM, LRRN4, TTN, PTPRD, OBSCN, LRRN4CL, TNR, CNTN3, NCAM1, IGSF9B, DSCAML1, EPHB1, CDON, TRIM67	488	150	10057	2.060860655737705	0.9894431062884332	0.563868	0.5638684544839684
SMART	SM00015:IQ	8	0.8537886872998933	0.012093717272273785	ASPM, OBSCN, SPATA17, SCN8A, LRRIQ1, MYO5A, SPA17, IQGAP3	488	52	10057	3.1705548549810847	0.9808301857851759	0.563868	0.5638684544839684
SMART	SM00233:PH	23	2.454642475987193	0.009062741566276516	PLEKHG3, AFAP1L2, DGKD, RTKN2, AGAP2, CIT, NET1, DNM3, BCR, CNKSR1, ACAP3, OBSCN, AGAP5, MCF2L, AKT3, ARHGEF4, KIF1B, KIF1A, PLCH2, SBF1, RALGPS1, DGKH, SPTBN2	488	264	10057	1.7954467834078487	0.9481198411737322	0.563868	0.5638684544839684
SMART	SM00737:ML	3	0.32017075773745995	0.013155032646134235	NPC2, LY86, LY96	488	4	10057	15.456454918032787	0.9864823104365819	0.563868	0.5638684544839684
GOTERM_CC_DIRECT	GO:0005763~mitochondrial small ribosomal subunit	5	0.5336179295624333	0.026601918087586843	MRPS28, MRPS15, MRPS36, MRPS33, MRPS12	845	25	18224	4.313372781065089	0.9999998100063713	0.565537	0.554699254937459
UP_KEYWORDS	Coiled coil	151	16.115261472785487	0.0680337670493201	FHOD3, ANKRD13B, SCOC, MAML2, ANKRD36, RTKN2, CASC1, HERC2, KIF5C, TNR, EP300, KIF21B, MAP3K9, SOX6, NCKAP5, BAHCC1, SOX5, MAGI1, SRRM2, CCDC153, KCNH7, RPS6, KRT7, CACNA2D2, MAPK8IP3, OBSCN, DAAM2, SCN8A, PSME1, RPL24, CCDC150, ANKRD36B, CTTNBP2, USP54, CREM, PCDH15, TTBK1, CCDC144A, PHF21B, RNF212, CCDC144B, C1ORF106, PDZD4, ZNHIT1, BLOC1S1, TNRC18, ATP6V0A4, KCNN3, CLSPN, SCN3A, PDZD8, MDN1, S…	907	3036	20581	1.1285852388028699	0.9999999999998862	0.575566	0.5469914870765336
UP_KEYWORDS	Methylation	55	5.869797225186766	0.06969772464257612	RAB3B, MDC1, SRXN1, CHD7, OTUD7A, TCF20, LMNB1, DPYSL4, RPS19, EP300, SBF1, RPS11, RPS10, PLEKHG3, SRRM2, NCOA2, KLF12, ANO8, KRT7, C10ORF12, NAV1, CSNK1E, ARID1A, TANC2, BCR, SYNPO2L, MAPT, AHDC1, NFIX, CTTNBP2, USP54, NDUFB3, TULP4, ADCY5, ARVCF, GNG10, RRAS, RPS3, WASF1, SPEN, ZNF462, TNK2, CBX2, GNG11, IGF2R, TNRC6C, ARHGAP33, CENPE, CENPF, RPS29, WNK2, ASXL2, HIST1H4J, IGSF9B, RCOR2	907	1001	20581	1.246774174006809	0.9999999999999466	0.578081	0.5493820648297176
GOTERM_BP_DIRECT	GO:0019882~antigen processing and presentation	9	0.96051227321238	0.004648490158078007	RAB32, RAB3B, AZGP1, HLA-DMB, RAB34, HLA-DRA, CTSH, PSMB8, HLA-DRB1	812	55	16792	3.3839677563815496	0.999998600556456	0.584699	0.5830823524371761
UP_KEYWORDS	Notch signaling pathway	6	0.6403415154749199	0.07276219436638001	SPEN, PSENEN, NEURL1B, NOTCH1, MAML2, DLL1	907	51	20581	2.6695635255204615	0.9999999999999868	0.591892	0.5625077333708609
GOTERM_CC_DIRECT	GO:0005790~smooth endoplasmic reticulum	5	0.5336179295624333	0.030320167911343978	RYR1, PLCB4, PRDX4, SRI, MAPK8IP3	845	26	18224	4.147473827947201	0.9999999788806585	0.621563	0.6096519476459521
UP_KEYWORDS	Transmembrane helix	268	28.601921024546424	0.07887271305209069	IFI27L2, TMEM183A, LST1, XYLT1, ICAM4, RPL9, GPR173, RPS14, MYB, VSTM1, EPHB1, GPR179, CDON, ARL10, ATP6V0E1, ALG5, CACNA2D2, COX7A2L, GPR160, TMEM126B, SLC45A2, TMEM63C, EPB41, MGST3, SDC2, IL20RA, PCDH15, MGST2, LPAR2, MST1R, CYB5R1, FAM171A2, TSPAN6, FLRT1, B4GALNT1, ATP6V0A4, KCNN3, RHBDL3, SCN3A, S100A10, PROM2, ABCA2, GPR17, SURF1, DNAH10, TMEM50B, TNFSF13, LRRN4, PCDHGA11, LPAR6, LRRN1, IG…	907	5634	20581	1.0793868851855895	0.9999999999999992	0.626149	0.5950640540741476
UP_KEYWORDS	Polymorphism	552	58.911419423692635	0.07993397741294521	MDC1, MAML2, GMFG, XYLT1, C4BPA, ALKBH7, BACH2, C19ORF53, ZMIZ1, MYB, AKT3, RPL36, VSTM1, ROPN1L, DIP2C, NCKAP5, GTSE1, GPR179, GABARAPL2, CACNA2D2, RNASE3, RNASE2, BCR, SULT2B1, MYL6, RBP3, DAAM2, PSME1, PIH1D2, TMEM126B, HOXB7, C12ORF60, AGAP2, IL20RA, WDR62, IQGAP3, SULT1A1, RNF212, CYB5R1, RHBDL3, SERF2, PROM2, ABCA2, AFAP1L2, DNAH10, EDEM2, MTHFS, MRPL22, PCDHGA11, ZNF37A, FASN, ZBTB8B, HLA-…	907	12043	20581	1.0400724123343026	0.9999999999999996	0.626149	0.5950640540741476
KEGG_PATHWAY	hsa04713:Circadian entrainment	10	1.0672358591248665	0.03721307653003093	RYR1, GUCY1A2, GNG10, PLCB4, KCNJ9, NOS1, ADCY1, GNG11, CACNA1G, ADCY5	330	95	6879	2.1942583732057415	0.9999004973866965	0.645913	0.6326223010105257
UP_KEYWORDS	rRNA-binding	4	0.42689434364994666	0.08666994834669785	EMG1, RPS9, RPS18, RPS11	907	24	20581	3.781881661153988	1.0	0.654668	0.6221664149173667
UP_KEYWORDS	Differentiation	38	4.055496264674493	0.086499761638846	SEMA5B, HIP1, NOTCH1, SEMA3D, SDC2, CREM, CIB1, DAZ1, DLL1, COL19A1, LGALS3, TNFSF12-TNFSF13, JARID2, ZNF541, SEMA6C, TMEM176B, CBX2, BMP8B, C10ORF11, NAV1, SOX11, RPS3A, NME5, MYT1, PSMB8, MLF1, NME1, CIT, SFRP1, CENPF, OBSCN, ELF3, SMOC1, MORN2, MGP, TSSK3, MURC, VAMP5	907	667	20581	1.2927571495398937	1.0	0.654668	0.6221664149173667
UP_KEYWORDS	Kinase	41	4.375667022411953	0.09405164298352184	BRSK2, DGKD, MAST1, AATK, MST1R, PKMYT1, TTBK1, TTN, GSG2, AKT3, MAP3K9, MAP4K5, EPHB1, PDGFRA, CDKL5, TNK2, IPMK, NME2, LMTK2, CSNK1E, ACVR2B, MAPK8IP3, HIPK2, NME1, CIT, ICK, ERN1, BCR, CNKSR1, OBSCN, SBK1, ETNK2, TAOK1, WNK2, WNK3, TSSK3, TNIK, PKIG, DGKI, RBKS, DGKH	907	735	20581	1.2657726376107223	1.0	0.657213	0.6245856957935108
UP_KEYWORDS	Sarcoplasmic reticulum	5	0.5336179295624333	0.09788283292286362	RYR1, HAX1, ATP2A1, SRI, SYNE2	907	40	20581	2.8364112458654906	1.0	0.657213	0.6245856957935108
UP_KEYWORDS	Postsynaptic cell membrane	13	1.3874066168623265	0.09765420290845801	CHRNB2, GRID2, NLGN2, KCNB1, CHRNA4, LRRC4, BCR, GABRR2, LRRTM1, DLGAP1, IGSF9B, CACNG5, KCTD16	907	179	20581	1.6479707797207321	1.0	0.657213	0.6245856957935108
UP_KEYWORDS	DNA repair	19	2.0277481323372464	0.09632460772504475	POLQ, MDC1, UHRF1, MGMT, CETN2, XRCC2, FOXM1, BRCA2, RBX1, RNF168, BRIP1, HERC2, TAOK1, RPS3, REV3L, RAD54L, FBXO6, CLSPN, POLE	907	293	20581	1.4714488374455788	1.0	0.657213	0.6245856957935108
UP_KEYWORDS	Leucine-rich repeat	20	2.134471718249733	0.09282230886462307	LRRC34, LINGO3, LRRN4, LRRIQ1, LRRC4, C10ORF11, LRRC10, ELFN2, PKD1, DCN, TSHR, LRIT2, SLITRK1, LRRTM1, FLRT1, TLR9, LRRN1, LRRC8B, LGR6, LGR5	907	311	20581	1.4592469432105417	1.0	0.657213	0.6245856957935108
UP_KEYWORDS	Transmembrane	268	28.601921024546424	0.09181235239664506	IFI27L2, TMEM183A, LST1, XYLT1, ICAM4, RPL9, GPR173, RPS14, MYB, VSTM1, EPHB1, GPR179, CDON, ARL10, ATP6V0E1, ALG5, CACNA2D2, COX7A2L, GPR160, TMEM126B, SLC45A2, TMEM63C, EPB41, MGST3, SDC2, IL20RA, PCDH15, MGST2, LPAR2, MST1R, CYB5R1, FAM171A2, TSPAN6, FLRT1, B4GALNT1, ATP6V0A4, KCNN3, RHBDL3, SCN3A, S100A10, PROM2, ABCA2, GPR17, SURF1, DNAH10, TMEM50B, TNFSF13, LRRN4, PCDHGA11, LPAR6, LRRN1, IG…	907	5651	20581	1.0761397471484007	1.0	0.657213	0.6245856957935108
UP_KEYWORDS	Bromodomain	5	0.5336179295624333	0.0911008192291137	BRD3, CECR2, EP300, BRWD3, SMARCA4	907	39	20581	2.909139739349221	1.0	0.657213	0.6245856957935108
UP_SEQ_FEATURE	domain:PH	23	2.454642475987193	0.0016754066272329786	PLEKHG3, DGKD, RTKN2, AGAP2, CIT, NET1, DNM3, BCR, CNKSR1, ACAP3, OBSCN, AGAP5, MCF2L, AKT3, ARHGEF4, KIF1B, KIF1A, PLCH2, SLC26A10, SBF1, RALGPS1, DGKH, SPTBN2	904	245	20063	2.0834793209319127	0.9900437555046995	0.658195	0.6579561168947797
GOTERM_MF_DIRECT	GO:0050786~RAGE receptor binding	4	0.42689434364994666	0.012530989764142787	S100A13, S100A4, S100B, S100A8	787	11	16881	7.79993069192561	0.9999685010206862	0.686698	0.6825212424869771
GOTERM_MF_DIRECT	GO:0004859~phospholipase inhibitor activity	4	0.42689434364994666	0.012530989764142787	ANXA2, ANXA4, APOC1, ANXA2P2	787	11	16881	7.79993069192561	0.9999685010206862	0.686698	0.6825212424869771
GOTERM_CC_DIRECT	GO:0032587~ruffle membrane	9	0.96051227321238	0.03584074441944299	KANK1, CDKL5, RAB34, HIP1R, RPS3, ARHGEF4, CIB1, AIF1, NME1	845	82	18224	2.3670948188771828	0.9999999992031131	0.7094	0.6958047968326346
INTERPRO	IPR013787:S100/CaBP-9k-type, calcium binding, subdomain	7	0.7470651013874066	0.0019493397189879569	S100A6, S100A13, S100A4, S100B, S100A8, S100A11, S100A10	870	29	18559	5.149147839873167	0.942984007632152	0.715408	0.7154076768685802
GOTERM_BP_DIRECT	GO:0001890~placenta development	7	0.7470651013874066	0.006087472470726143	ETNK2, RPS6, ETV2, NDP, LHX4, DCN, ADA	812	35	16792	4.1359605911330055	0.9999999787068372	0.733794	0.7317649199185384
GOTERM_CC_DIRECT	GO:0005761~mitochondrial ribosome	5	0.5336179295624333	0.03863155913479468	NDUFA7, MRPS12, MRPL34, MRPL13, MRPL11	845	28	18224	3.8512256973795433	0.9999999998490683	0.73915	0.7249855930963134
SMART	SM00217:WAP	4	0.42689434364994666	0.027560042046877137	SLPI, WFIKKN1, WFDC2, WFDC3	488	14	10057	5.888173302107728	0.9998863920667401	0.746418	0.7464178054362558
SMART	SM00240:FHA	5	0.5336179295624333	0.023113254983572404	MDC1, KIF14, KIF1B, KIF1A, MKI67	488	23	10057	4.480131860299358	0.9994995387173273	0.746418	0.7464178054362558
SMART	SM00042:CUB	7	0.7470651013874066	0.027356320819083502	SCUBE3, C1S, MASP2, CSMD3, KREMEN2, CSMD2, CSMD1	488	48	10057	3.0054217896174866	0.9998783884369453	0.746418	0.7464178054362558
KEGG_PATHWAY	hsa04350:TGF-beta signaling pathway	9	0.96051227321238	0.04673994944419403	BMP8B, EP300, SMAD9, INHBC, ACVR2B, DCN, INHBE, SKP1, RBX1	330	84	6879	2.2334415584415583	0.999991120909714	0.757187	0.7416071978478787
GOTERM_CC_DIRECT	GO:0034719~SMN-Sm protein complex	4	0.42689434364994666	0.04143450808504221	SNRPD2, SNRPG, SNRPE, GEMIN7	845	17	18224	5.074556213017751	0.9999999999717571	0.767207	0.7525041307057666
GOTERM_CC_DIRECT	GO:0032809~neuronal cell body membrane	4	0.42689434364994666	0.04805977973342865	KCNB1, FLRT1, KCNA2, RGS8	845	18	18224	4.7926364234056535	0.9999999999994729	0.835949	0.8199289693915252
GOTERM_CC_DIRECT	GO:0016020~membrane	119	12.700106723585913	0.04717940590030265	GOLT1B, LST1, NCF4, CIB1, MKI67, RPL9, RPS14, LGALS3, HERC2, RPS19, CCND1, RPL18A, RPS18, RPL36, RPL35, RPS11, SPA17, B2M, GTSE1, RPS10, RPS13, SLC16A4, PDGFRA, RPS9, ATP6V0E1, DSCAM, RPS7, RPS5, RPS6, ALG5, CYBA, BCR, RAB32, MYL6, DPM3, LTB4R2, RPL24, RPL27, PRR11, FTL, CHRNA4, MGST3, SLC1A1, AGAP2, PKMYT1, CYB5R1, RRAS, B4GALNT1, EIF4EBP3, PDZD8, MDN1, PLXNA3, ATP6V1F, ZBED3, ABCA2, TNK2, TNFSF…	845	2200	18224	1.1665712748789672	0.9999999999991038	0.835949	0.8199289693915252
GOTERM_MF_DIRECT	GO:0035091~phosphatidylinositol binding	10	1.0672358591248665	0.017199808418157193	ARHGAP33, TUB, HIP1, MCF2L, NCF4, HIP1R, TULP4, SNX10, SNX30, ZCCHC14	787	85	16881	2.5235069885641677	0.9999993596445826	0.88364	0.8782652173521517
GOTERM_CC_DIRECT	GO:0005829~cytosol	173	18.463180362860193	0.053469251914382294	RAB3B, VPS29, SCOC, RPL34, NCF4, HNMT, SAT1, RPL9, TXNDC17, PYCARD, RPS14, RGS2, HPGDS, DPYSL4, RPS19, CCND1, SNRPD2, RPL18A, RPS18, RPL36, RPL35, FBXO6, RPS11, RPL39, GTSE1, RPS10, EPHB1, RPS13, SKP1, GABARAPL2, RPS9, TRAPPC2L, RPS7, RPS5, RPS6, LMTK2, CMBL, CSNK1E, CDC25A, RBX1, BCR, SULT2B1, SFRP1, MYL6, OBSCN, PSME1, S100A6, SNRPG, RPL24, RPL27, SNRPE, GEMIN7, PHPT1, S100A8, DGKI, FTL, NOTCH1…	845	3315	18224	1.1255105446821423	0.99999999999998	0.902687	0.8853879066999186
GOTERM_CC_DIRECT	GO:0001726~ruffle	9	0.96051227321238	0.0568320404198017	ANXA2, S100A6, NME2, MYO5A, MTSS1L, LAYN, S100B, S100A11, MTSS1	845	90	18224	2.156686390532544	0.9999999999999974	0.932045	0.9141839644670959
GOTERM_MF_DIRECT	GO:0044548~S100 protein binding	4	0.42689434364994666	0.020265345101507123	ANXA2, S100A6, S100B, S100A11	787	13	16881	6.599941354706285	0.9999999508908529	0.979889	0.97392864399596
UP_SEQ_FEATURE	repeat:LRR 13	9	0.96051227321238	0.019269772273907776	CENPE, DNAH10, LINGO3, SLITRK1, TLR9, LRRC8B, LGR6, LGR5, SYNE2	904	75	20063	2.6632300884955753	1.0	0.993749	0.9933874150126653
UP_SEQ_FEATURE	domain:FHA	6	0.6403415154749199	0.019332113288254172	MDC1, KIF13A, KIF14, KIF1B, KIF1A, MKI67	904	35	20063	3.804614412136536	1.0	0.993749	0.9933874150126653
[truncated: 346 more rows]

## Sheet: DAVID_analysis_UP_DOWN
Category	Term	Count	Benjamini	Gene Up-regulated	Gene Down-regulated
[truncated: 526 more rows]
