# Supplementary material for: Transmembrane Protein TMEM230, a Target of Glioblastoma Therapy
Source: Front Cell Neurosci. 2021 Nov 17;15:703431. doi: 10.3389/fncel.2021.703431 (PMC8636015; doi:10.3389/fncel.2021.703431)
Supplement: Supplementary Table 6 — All enriched pathways identified different between glioblastoma and LGG from DEG. [file Table_6.XLSX]

## Sheet: all_genes
gene_name	baseMean	log2FoldChange	lfcSE	stat	pvalue	padj
A1BG	128.668939596001	1.07801398101673	0.0961819800254323	11.2080660091598	3.722378611665e-29	1.4220218003283e-28
A1CF	0.0105865311079394	-0.0952659276998908	3.29665415393256	-0.0288977621708509	0.976946130406873	0.999641322860956
A2BP1	439.604061056877	-2.08826342436162	0.179449583456762	-11.6370480451117	2.6710090959348e-31	1.09847371673518e-30
A2LD1	57.0093762418453	1.43721776507391	0.0951925182922574	15.0980118065729	1.66890086138276e-51	1.35695741489706e-50
A2M	15470.9536163533	0.78150166466842	0.0756738916770199	10.3272297399995	5.30711717105142e-25	1.76071939216322e-24
A2ML1	155.8648138806	-0.943060792015962	0.139347102072089	-6.76771011375667	1.3083656623343e-11	2.69350218345132e-11
A4GALT	108.321592318728	0.133932650911423	0.0859783356491973	1.5577488200968	0.11929280261582	0.146978757303338
A4GNT	0.54413973928621	0.751266346312497	0.227143682290176	3.30744988695197	0.000941495553640967	0.00135162705386913
AAA1	0.109302766278003	0.188210939811133	0.75589671847304	0.248990285592629	0.80336829580083	0.874672913036736
AAAS	784.251109805634	0.0703017944345335	0.0354464739748603	1.98332264259609	0.0473314017902959	0.0605361879920663
AACS	489.292834688437	-0.152591404038488	0.0619254895502633	-2.46411300333174	0.0137352799691609	0.0183177109007452
AACSL	0.940016309831086	-1.18617586970882	0.265694246375273	-4.4644394294991	8.0278654310604e-06	1.29484439739553e-05
AADAC	0.112099583465686	0.0276204005873239	1.02877476802327	0.0268478596538627	0.978581080475703	0.999641322860956
AADACL2	0	NA	NA	NA	NA	NA
AADACL3	0.0098915422836139	-0.00349975736849762	3.39376039627614	-0.00103123289797883	0.999177195337945	0.999641322860956
AADACL4	0.00604303436354233	-0.0559603303928672	3.39376039627614	-0.0164891812793474	0.986844133004539	0.999641322860956
AADAT	257.60261718425	-0.437536640905955	0.044386809392707	-9.85735732962696	6.37039611941913e-23	1.96943796436752e-22
AAGAB	733.753977025084	0.525362594444382	0.0373121362059569	14.0802068137956	5.02624825675235e-45	3.29155332651476e-44
AAK1	1206.02259709564	-0.765065873987348	0.0607883535173941	-12.5857311428649	2.52989457767942e-36	1.22796523539028e-35
AAMP	2629.87686592633	-0.299155453964612	0.0252821220102741	-11.8326876930284	2.64533520397395e-32	1.1219186938035e-31
AANAT	3.18317599888527	0.381167364549488	0.121131095770408	3.14673422315895	0.00165104963957492	0.00233660005749222
AARS	5858.65416893669	-0.791616752072138	0.0321129422847822	-24.6510190518192	3.58867773154984e-134	4.16013793406506e-132
AARS2	466.417827110954	-0.365767575174825	0.0351891349471622	-10.3943326746747	2.63122288314418e-25	8.81693747413143e-25
AARSD1	615.61959141419	-0.534750822562042	0.0408417982332333	-13.0932242382734	3.59995537744985e-39	1.92661758766707e-38
AASDH	317.819880076567	-0.102559781114671	0.0442671892430273	-2.316835174504	0.0205127121488069	0.0269912706887354
AASDHPPT	1597.01291124888	-0.318959283753796	0.0360552062537967	-8.8464140659356	9.03764664258026e-19	2.4121888972111e-18
AASS	1174.03510477989	-0.30849251799032	0.0599181124994402	-5.148568690197	2.62481663905202e-07	4.53910322218689e-07
AATF	1225.05958018221	-0.429983248813474	0.0386998372978021	-11.1107249755258	1.11252581280878e-28	4.18236282710193e-28
AATK	1479.63187026369	-1.84919875869426	0.102797012816363	-17.9888374966468	2.38304705191486e-72	3.9830642251356e-71
ABAT	9808.55676337739	-1.14588154867616	0.0666907453993293	-17.1820174120843	3.62096731535692e-66	4.85974509765201e-65
ABCA1	2485.98724629139	-0.0329337673094967	0.0737228594477263	-0.446723954499468	0.655074383873962	0.730098926770131
ABCA10	5.76479658718623	-0.125518900062856	0.127387752333234	-0.98532941953879	0.324462286330477	0.380806151683189
ABCA11P	129.485964032366	0.072978066600446	0.0501554344943633	1.45503806987551	0.145658722402574	0.177948530394812
ABCA12	7.52041278168692	0.608362557570463	0.141631312745697	4.29539588228483	1.74381866492169e-05	2.75879628050619e-05
ABCA13	30.134159775668	1.94791106394793	0.196888260015443	9.89348508537356	4.44285833078235e-23	1.38215286709194e-22
ABCA17P	54.566736130416	-1.04445470579737	0.0877218524377897	-11.9064369569495	1.09559566637008e-32	4.72335643637539e-32
ABCA2	6838.55077159891	-1.31182268555161	0.083531558395919	-15.7045158828941	1.40848769373509e-55	1.31514138261473e-54
ABCA3	4236.88198579696	-0.988579917390712	0.0463608513400316	-21.3235928335314	6.85854938523291e-101	2.73555381214229e-99
ABCA4	6.97196256495676	-0.0627970226584396	0.126517780320995	-0.496349386616759	0.619647927933442	0.693853068712909
ABCA5	177.465420924239	0.413094626199227	0.129352550604901	3.19355609354004	0.00140532032080508	0.00199811108300954
ABCA6	42.6368613903277	-0.37794884268914	0.16618454829512	-2.27427186562469	0.0229496456517256	0.0300919979993489
ABCA7	179.110157278708	-0.13904585444476	0.0926546991672818	-1.50068863958774	0.133436112763342	0.163682182135379
ABCA8	583.443622503412	-0.348713813901567	0.106137280471759	-3.28549791695815	0.00101802295132483	0.00145779592314615
ABCA9	56.571083947162	-0.740868857722084	0.107462899376905	-6.89418266227519	5.41753760131133e-12	1.12937057388574e-11
ABCB1	582.818774404223	-0.927205803452268	0.0687650268877511	-13.4836827005943	1.95119305684395e-41	1.14298167747688e-40
ABCB10	300.892153035456	0.205446739962173	0.030926777697618	6.64300503501846	3.07351335953428e-11	6.23350269347738e-11
ABCB11	1.01025289217731	0.436315474332332	0.443522188363397	0.983751175882184	0.325237870678931	0.381693819813418
ABCB4	54.5578979155053	0.616225696989469	0.091110777647416	6.76347752594279	1.34718279861199e-11	2.77226249526475e-11
ABCB5	0.464565345529488	2.47789395430672	0.415185232789517	5.96816495051719	2.39936741059961e-09	4.51344279562688e-09
ABCB6	893.751114891928	-0.21897373067144	0.0411567419818268	-5.32048262634905	1.03492332515573e-07	1.82228504837111e-07
ABCB7	415.574203325676	0.289258953394745	0.0333064026609087	8.68478521501346	3.79458692171814e-18	9.89998638447205e-18
ABCB8	913.633503063979	0.353955486086365	0.0436564162572908	8.10775405842556	5.156397353398e-16	1.24288989222287e-15
ABCB9	248.170733487416	0.320619567767793	0.0747753732838444	4.28776953811697	1.80476195942542e-05	2.85293431592426e-05
ABCC1	490.129615349226	0.261047478899147	0.0622021554736699	4.1967593712994	2.70761341894864e-05	4.23823600788209e-05
ABCC10	395.163933431522	-0.208470079818187	0.0374883612777803	-5.56092805106819	2.68343817344378e-08	4.83711875167555e-08
ABCC11	14.4421462496322	-1.00077063498788	0.10549999672219	-9.48597787754616	2.40120979753484e-21	7.00296922414789e-21
ABCC12	7.69132294790457	-1.22059125110543	0.276752830388659	-4.41040205222575	1.03178868731649e-05	1.6533139720859e-05
ABCC13	0.538028908775995	0.429891581316964	0.363092814549303	1.18397160200093	0.236424304361618	0.282208646074569
ABCC2	6.27263542101452	-0.318454229287955	0.116597221742011	-2.73123342503464	0.00630977635083946	0.00862017206083326
ABCC3	492.195940825045	2.78307442530716	0.21678221031912	12.8381125979399	1.00289750513378e-37	5.11986537323383e-37
ABCC4	421.687898257996	-0.150036792461391	0.0596891373110288	-2.51363647089717	0.011949353574329	0.0160005428197733
ABCC5	1184.20906103408	-0.529560660859063	0.0565505420891986	-9.36437815262272	7.64994256371223e-21	2.19615947053537e-20
ABCC6	43.8194955632058	-0.645691365408827	0.090879779987086	-7.10489578100408	1.20413370280062e-12	2.57159474150148e-12
ABCC6P1	10.8928097833764	0.471897674094246	0.11503440130131	4.10223088707353	4.09185646526483e-05	6.33941935998005e-05
ABCC6P2	23.4993447991604	-0.0710166270417049	0.0857983544110847	-0.827715490922399	0.407831644089455	0.471974235552879
ABCC8	612.180570033415	-2.64911448959486	0.142507348930582	-18.5893184419934	3.92128894781271e-77	7.61329195029298e-76
ABCC9	375.995942192975	-0.766026738900319	0.100919811701449	-7.59044954588752	3.1879750479518e-14	7.21955040289979e-14
ABCD1	320.376367362387	0.555021255333068	0.0549126227800972	10.1073528677678	5.12503183545363e-24	1.6444400465231e-23
ABCD2	178.758029424896	0.185029893745692	0.116982440201571	1.58168946917904	0.113720477932408	0.140366191410593
ABCD3	1606.94348909963	0.319960940781972	0.0424705673874429	7.53371006003029	4.93185711849113e-14	1.10868908663926e-13
ABCD4	853.349946098231	0.0661268786041517	0.0438212643615193	1.50901347936048	0.131295338149725	0.161145903544176
ABCE1	1270.55896310548	0.0875094198008564	0.0310240694197842	2.82069442975947	0.00479198245976673	0.006586110261385
ABCF1	1771.05224558316	-0.249358931168614	0.0328983964968095	-7.57966824288219	3.46439684468524e-14	7.83421613645854e-14
ABCF2	1671.31390680397	0.301007838306397	0.0280054051003942	10.748205113525	6.04259992829976e-27	2.14625440563853e-26
ABCF3	1183.45410149582	-0.247136694789595	0.0265809426604837	-9.29751431114587	1.43767312475745e-20	4.09174362556597e-20
ABCG1	856.534468869832	-0.705826500506583	0.0669121528793072	-10.5485546366998	5.15845059787793e-26	1.77097274336221e-25
ABCG2	1124.53429434443	-0.472091380280949	0.0724912364489857	-6.51239244088731	7.39631742853717e-11	1.48083224306527e-10
ABCG4	63.2095605824189	-1.252748047695	0.141478905894654	-8.85466310170505	8.39369452827611e-19	2.2427309156762e-18
ABCG5	1.87273771724179	-0.535812499021378	0.103670425778718	-5.1684219004276	2.36078902161147e-07	4.08929751620099e-07
ABCG8	0.644268869327982	-1.8236873835391	0.364936170031807	-4.99727769757696	5.81453074612266e-07	9.90218582305751e-07
ABHD1	24.721837072926	-0.194364047427299	0.0862677520862603	-2.25303248000425	0.0242571011139699	0.0317496543666045
ABHD10	862.988985692778	-0.064541578457607	0.0345949052197448	-1.86563825070896	0.0620919942441064	0.0785281103675463
ABHD11	335.231419891573	0.419775970280832	0.0520778104662638	8.06055336279479	7.59498488090103e-16	1.82182218410093e-15
ABHD12	2173.22248178389	-0.0482227752223759	0.0374583540767722	-1.28737037200144	0.197965226035957	0.238310844459269
ABHD12B	13.3233763708255	-0.372086465911709	0.154243898816824	-2.41232534165639	0.0158511300339291	0.0210375569538415
ABHD13	375.71224346909	0.28963038442627	0.0430743058446085	6.72397102511919	1.76837612178824e-11	3.62245735891374e-11
ABHD14A	597.858363457005	-0.422542686498296	0.0548623881142216	-7.70186462934455	1.34094904967575e-14	3.07764652213991e-14
ABHD14B	569.967391958456	0.331847924997037	0.0530853212771668	6.25121817129836	4.07263483244398e-10	7.90326385546128e-10
ABHD15	195.669253622851	0.586249619354828	0.0583442318115604	10.0481161745053	9.36403196584143e-24	2.97854951313984e-23
ABHD2	4755.32059604809	-0.398513113615634	0.0729532274419206	-5.46258373466613	4.69254066329949e-08	8.36738630643032e-08
ABHD3	370.349122247979	0.34023382560593	0.0544849896269967	6.244542358091	4.2504273664627e-10	8.24424869720059e-10
ABHD4	1953.05167648563	-0.0531070915236885	0.0499104843900409	-1.06404680645186	0.287307496244332	0.339005743931631
ABHD5	757.56689063361	0.0962633961941008	0.0371231599997817	2.59308195193154	0.00951201016442757	0.0128295963454751
ABHD6	938.83649806313	-0.922064337120879	0.0546150494701361	-16.8829717461864	6.00446578544669e-64	7.42987049094319e-63
ABHD8	649.112264024558	-0.0750878838667746	0.0709898215085639	-1.05772746389729	0.290179710574586	0.342292912985422
ABI1	2077.50813328961	-0.796881975273703	0.0435610982152068	-18.293431706814	9.33490448466134e-75	1.69146080072616e-73
ABI2	4403.49841373845	-0.679770709560407	0.0371489990410234	-18.2984932867166	8.50691232363443e-75	1.54425387354767e-73
ABI3	344.19956066768	0.697392336596087	0.0940851440684463	7.41235339012436	1.24077591409516e-13	2.75368349139145e-13
ABI3BP	581.82146185722	-1.24561311538293	0.129788164356856	-9.59727816134363	8.20833636598412e-22	2.43146819759269e-21
ABL1	3085.58687943969	-0.345555911232043	0.0410799410877902	-8.41179179136528	4.03794201018702e-17	1.01129658203332e-16
ABL2	1039.15309613168	-0.707651015442088	0.0425001471936965	-16.6505544608336	2.99811560687102e-62	3.51043388511544e-61
ABLIM1	5158.84078237084	-1.54840964792004	0.0577155508664859	-26.828291936466	1.51162867464678e-158	3.84166861763118e-156
ABLIM2	301.151435224508	-1.15438573656977	0.102609329728831	-11.2502999446591	2.3080583124545e-29	8.89956038276318e-29
ABLIM3	1190.71531622142	-1.534052205275	0.08714027108973	-17.6044001939741	2.27909177423738e-69	3.41743088053764e-68
ABO	2.95416779037665	-1.15572486133409	0.152411307055644	-7.58293386272281	3.37827080456868e-14	7.64468746106907e-14
ABP1	1.11517759944429	1.08287300888974	0.257668718940621	4.2025784633147	2.6389173266641e-05	4.13429685975361e-05
ABR	6246.63963853085	-0.896647775703707	0.0540835003063492	-16.5789523722533	9.89385531439646e-62	1.13367568726752e-60
ABRA	0.538397498238431	-0.553726041696787	0.364458509707835	-1.51931160049103	0.128684081122884	0.158081314268861
ABT1	437.710723618866	0.420330361806172	0.0300392417462658	13.9927087826184	1.72706437928068e-44	1.10830680448303e-43
ABTB1	433.323379244571	-0.233516904064714	0.0736562927610549	-3.17035918196773	0.00152250608940564	0.00215992544265999
ABTB2	353.690026766676	-0.947255355208543	0.0947204513811983	-10.0005367520511	1.51573255077804e-23	4.78445324109444e-23
ACAA1	1560.50267993181	0.0144410547377377	0.0404069717219142	0.357390176059785	0.720799730171135	0.795657258669251
ACAA2	740.378047924869	1.1796770584688	0.0779839299550682	15.1271814481328	1.07188909935378e-51	8.79472583463986e-51
ACACA	2361.88382241137	-0.870903432981351	0.0458419349253062	-18.9979640780953	1.77289351924826e-80	3.84088177399544e-79
ACACB	362.091056901418	-0.355659061061881	0.0890120560913959	-3.99562797085259	6.45229915609444e-05	9.88820457450793e-05
ACAD10	481.018520386836	-0.238254585097693	0.0355402982644631	-6.70378687665445	2.0308640305136e-11	4.15071839126416e-11
ACAD11	663.591622401598	-0.120734900542822	0.0493062064483387	-2.44867551652597	0.0143382553030871	0.0190884643971186
ACAD8	944.85911963174	-0.063368371881953	0.0299450986594674	-2.1161517149291	0.03433190633157	0.0444549859044165
ACAD9	776.915463714326	-0.0576149624869017	0.0236204149255654	-2.43920196442199	0.0147197390190559	0.0195792381785375
ACADL	24.7523129624841	1.00774863700301	0.162985266042378	6.18306587750684	6.28684624977537e-10	1.21182568270417e-09
ACADM	1059.62096576089	0.206580261914251	0.0436701433001647	4.73046906428338	2.24001661183264e-06	3.7126964294614e-06
ACADS	264.954011065824	0.656376689633912	0.0780821734947517	8.40622974817717	4.23401354047226e-17	1.05933169775062e-16
ACADSB	672.662302700896	-1.12000039402463	0.0504220342964552	-22.2125189840539	2.59947974203066e-109	1.38148758515479e-107
ACADVL	3744.42707049624	-0.000400435242358707	0.0443028456029791	-0.00903858966413165	0.992788347049681	0.999641322860956
ACAN	208.111429565979	-0.00425534906525906	0.180035419739571	-0.0236361771001207	0.981142815052119	0.999641322860956
ACAP1	23.4871184399566	1.13420261812008	0.126127044141081	8.99254101960404	2.41579308235178e-19	6.56723344369985e-19
ACAP2	1078.53244658999	-0.362446789538994	0.0401443401751625	-9.0285900318083	1.73897849779794e-19	4.7586652073231e-19
ACAP3	2986.58025776696	-0.634313181942969	0.0752387987000182	-8.43066599816426	3.43703451419963e-17	8.63856157917831e-17
ACAT1	1600.90234877414	-0.355958433814431	0.0379448324089211	-9.38094626373268	6.53832654983433e-21	1.88030244011847e-20
ACAT2	879.959718832283	-0.292845361418691	0.0717969574703157	-4.07879904297849	4.52689456070021e-05	6.99537191119117e-05
ACBD3	931.433508456628	0.0708307405036218	0.0323521544868037	2.18936703373228	0.0285701737293405	0.037227802132171
ACBD4	317.308801591237	-0.490800574405711	0.0549800557570914	-8.92688389721043	4.38176888958124e-19	1.18128389362395e-18
ACBD5	1924.16126084581	-1.1268837316223	0.0429061256930791	-26.2639358231329	4.95471225479451e-152	1.07931056073397e-149
ACBD6	543.691226820502	0.281519315590117	0.0342281563569809	8.22478758873324	1.95537075754531e-16	4.77591356910063e-16
ACBD7	907.793996380129	-1.95823880009564	0.122021434039187	-16.0483181952013	5.87341219333425e-58	5.94326952059545e-57
ACCN1	88.7789811456904	-1.82508766672354	0.171973014397749	-10.6126398558228	2.60289206659832e-26	9.02521067626e-26
ACCN2	2900.26507017688	-1.34594065196905	0.083582674616916	-16.103105794806	2.42614569588142e-58	2.49447542165235e-57
ACCN3	146.25202705673	-0.937376368329668	0.096543028616877	-9.70941539496931	2.74909300563158e-22	8.29203753052873e-22
ACCN4	1930.74070870436	-1.47692045849313	0.138804643436459	-10.6402813474264	1.93544039909224e-26	6.74867810575295e-26
ACCN5	0.0152953089801824	0.112322981687736	2.6850851007912	0.0418321868661213	0.966632476054134	0.999641322860956
ACCS	100.672460666126	0.929678150934821	0.109692796473125	8.47528899641639	2.34496676635031e-17	5.93972351256864e-17
ACCSL	0.0534360552064359	-0.213034659499416	1.07065877098354	-0.198975308728584	0.84228205917603	0.911463337029725
ACD	563.293474146134	-0.279487410123812	0.0400923264640015	-6.97109483967613	3.14483867054303e-12	6.62347396580689e-12
ACE	306.730236389	1.3220482756572	0.111764431178853	11.8288820666171	2.7680374493746e-32	1.17320518193185e-31
ACE2	3.34385256841543	-0.323128971462985	0.137203544314213	-2.35510659056285	0.0185173931802957	0.0244583079033183
ACER1	0.0857680307148013	0.367248077251385	0.723645045987386	0.507497535273373	0.611805765337983	0.686077530903015
ACER2	26.2636070856548	0.112159669360674	0.0764821868652419	1.46648094095811	0.142517309743828	0.174293332781288
ACER3	607.599043018295	-0.108006365161059	0.0420969103455483	-2.56566014642166	0.0102979671366915	0.0138566795106323
ACHE	386.738637297192	-0.189012005668318	0.0900848775728291	-2.09815465992626	0.0358914853549848	0.04637445666744
ACIN1	2780.26935834853	-0.451847506409062	0.0355581970925962	-12.7072670538503	5.38849007737532e-37	2.67307404413942e-36
ACLY	3883.45933729935	0.0895073065641452	0.0392945760605813	2.27785398234478	0.0227352787946473	0.0298128882414695
ACMSD	1.42055007691763	2.9192930843355	0.471472179231781	6.19186711948139	5.94556670415496e-10	1.14793969783251e-09
ACN9	251.974643104309	1.45231998671556	0.0766795390082782	18.940124125665	5.32713749109625e-80	1.13426258309346e-78
ACO1	1020.91457692497	-0.181517267363778	0.0356027139093064	-5.0984109758085	3.42516549047121e-07	5.89537687918823e-07
ACO2	5656.7681937238	-0.825483333222237	0.0456976423628384	-18.0640245434965	6.11940743486419e-73	1.03502571315113e-71
ACOT1	348.977059691798	-0.684695817981781	0.0690123374723521	-9.92135381961357	3.36165151859956e-23	1.049582895782e-22
ACOT11	92.8848319805033	0.612038425789859	0.118633074823684	5.15908760435899	2.48156184188853e-07	4.29511921695244e-07
ACOT12	1.42783025542598	2.14541068666744	0.368896977586921	5.81574482041379	6.03644934085056e-09	1.11748725517072e-08
ACOT13	670.852051416438	0.145068750829374	0.0354491008652492	4.09231115285029	4.27095033218557e-05	6.60965324653873e-05
ACOT2	219.295889820966	-0.225641888882944	0.0640941818488769	-3.52047381484592	0.00043077652426594	0.000631557062386194
ACOT4	23.1659138015777	0.501469987803419	0.109648218890372	4.57344399095799	4.79771972715433e-06	7.8224377489209e-06
ACOT6	3.35878397780221	0.104032878892397	0.140336275975853	0.741311383453681	0.458504661151632	0.526345720292379
ACOT7	1037.13316051634	-0.302066260328398	0.0744214503097044	-4.05886016828953	4.93128300667488e-05	7.60485631253432e-05
ACOT8	537.696641243292	0.0852682412666716	0.0367564919053883	2.31981445580153	0.0203509167339199	0.0267908236430133
ACOT9	352.03213765939	0.985867866120124	0.0603620740269097	16.3325711055028	5.78922910416207e-60	6.26760723821981e-59
ACOX1	2012.29249964952	-0.33768639809206	0.0311321139362407	-10.8468830219384	2.06342407025249e-27	7.44236814858355e-27
ACOX2	150.324330306668	0.543359576295087	0.0900651025023083	6.03296461336021	1.60978676901477e-09	3.04957980907682e-09
ACOX3	414.026547796257	-0.214988473663046	0.0310355353346775	-6.9271714292883	4.29338204243581e-12	8.98139639375318e-12
ACOXL	1.267930522292	-0.258841294687683	0.118316169633299	-2.18770853966891	0.0286908396256108	0.0373776625853366
ACP1	1261.37962469054	0.387784954565597	0.0277917567750101	13.953236483211	3.00646544596834e-44	1.91877541968546e-43
ACP2	1144.43707065689	0.393859220865311	0.0320504984337118	12.2887081360032	1.04157231231044e-34	4.77278963174523e-34
ACP5	99.1072522454325	1.39448982323108	0.154830970398629	9.00653028034903	2.1267873352741e-19	5.79668710946494e-19
ACP6	201.263906925021	0.627153553197299	0.0619160048837273	10.1291023924272	4.1039939459226e-24	1.32088767640889e-23
ACPL2	1105.3459130802	0.283421569033605	0.063612543269212	4.45543527216242	8.37231539272008e-06	1.34930413032431e-05
ACPP	16.2325543683197	1.63437137551395	0.169971466548982	9.61556318067633	6.87321822327216e-22	2.04208340587416e-21
ACPT	0.0749315023659179	-0.238059404458279	0.949895577233167	-0.250616394226925	0.802110705400431	0.873591589096903
ACR	3.11006713140512	-1.11682309032927	0.120147576388207	-9.29542753921823	1.46615758019215e-20	4.17161500102613e-20
ACRBP	24.0349049893017	0.435636693014511	0.0799073602067898	5.45177180033404	4.98704258613267e-08	8.88372979734974e-08
ACRC	44.5864223248643	-0.257999676136182	0.067403092183133	-3.82771276182999	0.000129339568430138	0.000195047414605602
ACRV1	8.85638879481776	0.200560580667174	0.157757186855387	1.27132452514524	0.203613220861906	0.24478287810938
ACSBG1	1119.23399536774	-0.73010821922042	0.0993398871753272	-7.34959783004218	1.98804103240223e-13	4.38364153340483e-13
ACSBG2	2.52097439636133	-0.566875820587545	0.163745134062549	-3.4619399460811	0.000536296807372879	0.000781404749176963
ACSF2	321.140679666509	0.159703859933213	0.0760761589216661	2.09926292542788	0.0357937297062889	0.046254178876647
ACSF3	381.166076690159	-0.326103282343047	0.0330211168733772	-9.87559819958613	5.31150864921987e-23	1.64850533824152e-22
ACSL1	1039.21231147086	0.39365786189972	0.0795769878890639	4.94688065409699	7.54121797905698e-07	1.27757938636737e-06
ACSL3	2706.25702345739	-0.12840060345451	0.0576514109090684	-2.22718926440555	0.0259346273172524	0.0338804611381241
ACSL4	1027.74939633618	-0.198890296005835	0.0521925254979903	-3.81070458093646	0.000138571282133247	0.000208667466250938
ACSL5	211.206870711819	0.0842153969041806	0.0607534317960428	1.38618337128514	0.165690917776376	0.201120021007966
ACSL6	715.756016794813	-1.75325520999561	0.101037062114576	-17.3525949122256	1.8853223993395e-67	2.63745560494756e-66
ACSM1	0.621239130837594	-1.22091838393473	0.239243448775769	-5.103246881711	3.33874979920774e-07	5.7506331800934e-07
ACSM2A	0.146736809907947	-0.61345569518065	0.927484834390549	-0.661418572502861	0.508343918531571	0.578666676068183
ACSM2B	0.0248717159911962	-0.149808238875343	3.39376039627614	-0.0441422556052345	0.964791010491334	0.999641322860956
ACSM3	1.79400244022896	0.927219775965788	0.153760450135998	6.03028786105714	1.63667884705534e-09	3.099635500638e-09
ACSM4	0.00546497577657229	-0.0330191119460994	3.39376039627614	-0.00972935861421748	0.99223721744677	0.999641322860956
ACSM5	219.148893382327	-1.01653335381397	0.115567845804991	-8.7959877311313	1.41795085328391e-18	3.75524913355338e-18
ACSS1	1602.82164368426	-0.952087838442979	0.0717343520970367	-13.2724114822291	3.34635994563493e-40	1.86281643365126e-39
ACSS2	676.633810023698	-0.00152202095386399	0.0363588816610661	-0.0418610497443822	0.966609466964075	0.999641322860956
ACSS3	317.265535531553	1.25776623451175	0.124986651808622	10.0632044807283	8.03398694443966e-24	2.56288579336381e-23
ACTA1	7.63061312353357	-0.334188669029889	0.122704424202179	-2.72352583211873	0.0064589164281396	0.00881966662223678
ACTA2	1166.96430796536	1.42386834753573	0.11580900533364	12.2949708741012	9.63915027920173e-35	4.42205220978051e-34
ACTB	91349.2133411728	0.736277802036802	0.0387566208793074	18.997471537306	1.78960675179233e-80	3.87285749353487e-79
ACTBL2	0.0649853434670141	0.701423964139071	1.85492965054886	0.378140466907478	0.705326248004578	0.780619854513692
ACTC1	54.3785475962278	-0.320860555903507	0.192246552101692	-1.66900551607179	0.0951162866333773	0.118323824909535
ACTG1	50759.6669904505	0.54014484331882	0.0367116754683022	14.7131624048375	5.30682898524224e-49	3.95478462309988e-48
ACTG2	74.9219762038619	2.16543073414231	0.200141246658001	10.8195125707525	2.78253251864086e-27	9.99603880337402e-27
ACTL6A	654.891785993916	1.02205089759944	0.047730921728094	21.4127626409918	1.01607251729905e-101	4.15290835266371e-100
ACTL6B	444.865446352295	-1.79944414522967	0.153196446264019	-11.7459914319977	7.4048934728329e-32	3.10332353725088e-31
ACTL7A	0	NA	NA	NA	NA	NA
ACTL7B	0.0449242791925755	0.273069700857546	1.1966181081635	0.228201210557175	0.819489820379055	0.890171883904543
ACTL8	0.947882882044948	0.0423979650889855	0.260468360440978	0.162775874264364	0.870694904446706	0.938184763322664
ACTL9	0.00140989169049898	-0.0625384665237019	3.39376039627614	-0.0184274843304564	0.98529782683783	0.999641322860956
ACTN1	2777.19170394952	1.520842233288	0.106302303505647	14.3067664870237	1.98531849870524e-46	1.3584731998562e-45
ACTN2	660.661042992203	-0.636916828050318	0.0809695893230226	-7.86612397784781	3.65798035869561e-15	8.55903501539461e-15
ACTN3	0.587493740002096	-0.309581434386024	0.234416793098239	-1.32064529291758	0.186619663151664	0.225158952078846
ACTN4	4607.77680840265	0.546329593355312	0.0486480748633965	11.2302407626489	2.89688097454355e-29	1.11137742516696e-28
ACTR10	1056.61522514105	0.0753950576913352	0.036360747839933	2.07352879603134	0.0381230940669835	0.0491585307805773
ACTR1A	3568.25534853534	-0.590442801215296	0.0349936543946026	-16.8728534195721	7.12689094050002e-64	8.8077530619409e-63
ACTR1B	1533.45957838293	0.00791873054120546	0.0350540272942057	0.225900735306222	0.821278625914542	0.891870614742192
ACTR2	4593.64922434666	-0.00128021994360543	0.030682749312834	-0.0417244207992123	0.96671838592764	0.999641322860956
ACTR3	2653.78290738082	0.767022378892043	0.034800917054185	22.0402921479853	1.18371085188235e-107	5.89565332082008e-106
ACTR3B	418.039077384224	-0.201054459661124	0.0636753606437383	-3.15749228003619	0.00159132450225116	0.00225400683159162
ACTR3C	8.49684434702133	0.477041829085117	0.118693404039418	4.01910984814868	5.841843158697e-05	8.97696565386439e-05
ACTR5	207.572584065849	0.0515072159735544	0.0338474571383651	1.52174551142787	0.128072859198622	0.157385672797364
ACTR6	703.457877985129	-0.253065110702971	0.0297388917497496	-8.50956763394193	1.7458313397117e-17	4.44428080738474e-17
ACTR8	560.276992473769	-0.102972853829088	0.0308091983801865	-3.34227630847124	0.000830943000439571	0.00119620792285502
ACTRT1	0.0144116561338544	-0.0428121466828475	2.69585506385458	-0.0158807301092938	0.987329543210198	0.999641322860956
ACTRT2	0.00300243446170293	-0.0679928272956796	3.39376039627614	-0.02003465753513	0.984015725393577	0.999641322860956
ACVR1	661.995634881181	0.165609842192769	0.040566827261102	4.08239572512899	4.45738134845896e-05	6.89225198677863e-05
ACVR1B	1097.67889510552	-0.440045804134777	0.0415598904535007	-10.5882330134417	3.37910037415265e-26	1.16757724798375e-25
ACVR1C	89.6692703715893	-1.84593675637113	0.140294413152271	-13.1575927714784	1.53911777571232e-39	8.35659591014662e-39
ACVR2A	339.343340987144	-0.261485867000964	0.0409363490924467	-6.38762060608896	1.68486716173617e-10	3.32793162087445e-10
ACVR2B	585.490764041346	-1.40064649234561	0.0637342112070823	-21.9763681987794	4.847224818924e-107	2.36666348732834e-105
ACVRL1	359.385179747695	0.690792819483268	0.0706162504640109	9.78234917521324	1.34062147806813e-22	4.09226048040414e-22
ACY1	441.596631669744	0.122063078082059	0.0511624796230668	2.38579285017739	0.0170423475770806	0.02257470471236
ACY3	126.464669118299	-1.48851090227223	0.157940470908583	-9.4245059148506	4.32135251816667e-21	1.24908385779554e-20
ACYP1	92.0009631815442	0.262719452404804	0.0668687132294766	3.92888452187224	8.53408059161526e-05	0.000129931704737012
ACYP2	543.562358811869	0.319091835086531	0.0556028122473221	5.73877151513858	9.53657767391488e-09	1.75007942260706e-08
ADA	139.020836356969	0.316102376571392	0.0832785874322017	3.79572212159261	0.000147214319757033	0.000221279152300854
ADAD1	0.0073185268785421	-0.0843559096116124	3.39376039627614	-0.0248561771491509	0.980169681992518	0.999641322860956
ADAD2	26.7819137301417	-1.01482520701519	0.171528396268534	-5.9163685377577	3.29127304428885e-09	6.15382999027898e-09
ADAL	244.964507294207	-0.120029843049616	0.0362937018680069	-3.30718104992819	0.000942399618847401	0.00135282697113564
ADAM10	1078.88064002359	0.0473431964365191	0.0512858811521825	0.923123389379542	0.355942906990529	0.415588187376208
ADAM11	303.018948802486	-1.5342347804192	0.132797247975124	-11.5532121622475	7.11119884053208e-31	2.88390537266505e-30
ADAM12	274.829740359779	2.65531096080408	0.157233024653055	16.8877433138693	5.53810965981828e-64	6.87426097599109e-63
ADAM15	1276.36630595367	0.22022190117753	0.0443823520459538	4.96192497751157	6.97979564563736e-07	1.18408634217774e-06
ADAM17	802.93191627488	0.242651885360167	0.0461500222695012	5.25789313693412	1.45715147942189e-07	2.55056192287683e-07
ADAM18	0.00138390426834599	-0.0625384665237021	3.39376039627614	-0.0184274843304564	0.98529782683783	0.999641322860956
ADAM19	333.170785654769	1.48899967396432	0.106174886305108	14.0240288996917	1.11122802912861e-44	7.17988045026609e-44
ADAM2	0	NA	NA	NA	NA	NA
ADAM20	1.94440826732602	-0.498983767782863	0.100575713004616	-4.96127497261651	7.00319695958838e-07	1.18785294198614e-06
ADAM21	8.73338118867643	0.498850462609391	0.0730888106048836	6.82526447592867	8.77634775834694e-12	1.81657660659613e-11
ADAM21P1	1.58080992896235	-0.0104194076768837	0.101330880969859	-0.102825590552034	0.918101394590353	0.97915338381474
ADAM22	542.468289877568	-1.46419784319743	0.0896207072229314	-16.3377180181722	5.32073160674019e-60	5.76669560636473e-59
ADAM23	511.490056778326	-0.0911242801976558	0.0838916486706528	-1.08621396338743	0.277384340968051	0.327921623986741
ADAM28	231.074925751611	0.204919692676667	0.100594420301123	2.03708806177571	0.0416412180259356	0.0535730701536943
ADAM29	4.88797468848092	-2.28445162297308	0.206777323350721	-11.0478827463026	2.24445847867078e-28	8.34275275130151e-28
ADAM30	0.013181044950849	-0.106173352699523	3.39376039627614	-0.0312848699678455	0.97504235651917	0.999641322860956
ADAM32	6.80431358790054	0.593914756185865	0.133649019898947	4.44383921883547	8.83676521790146e-06	1.4219595495938e-05
ADAM33	140.307213408217	2.08324876702439	0.146427286140923	14.227189630623	6.21288164689998e-46	4.18193388409163e-45
ADAM3A	0	NA	NA	NA	NA	NA
ADAM5P	0.00971126312933464	-0.0723234127087996	3.39376039627614	-0.0213107008933682	0.982997807699893	0.999641322860956
ADAM6	368.55473640931	1.58182324300186	0.232716654240872	6.79720687873332	1.06666876286995e-11	2.2032483991217e-11
ADAM7	0.00741045061349579	-0.0384734727180772	3.39376039627614	-0.0113365318188912	0.990954950029449	0.999641322860956
ADAM8	121.333489758709	1.64648838377238	0.107425813811048	15.3267480632579	5.06727579303e-53	4.37113176872209e-52
ADAM9	2602.0969114756	0.959464876507156	0.0627374184638096	15.2933432710596	8.46885997866872e-53	7.24237322507118e-52
ADAMDEC1	38.3033500952682	2.09755108454793	0.278681976597137	7.52668367779002	5.20452487577248e-14	1.16879230330166e-13
ADAMTS1	551.575254667594	1.18467413931671	0.107269253264887	11.0439301408328	2.34544836921414e-28	8.71486842041835e-28
ADAMTS10	362.123002228571	-0.252624016851876	0.0638844457920311	-3.95439005097212	7.67301464503069e-05	0.000117073714061302
ADAMTS12	38.4422835605023	0.533733893002338	0.127006804048281	4.20240393419743	2.64095336169755e-05	4.13715967195594e-05
ADAMTS13	260.513917767263	-1.19206814938029	0.0762037301977476	-15.6431731922688	3.69830585673232e-55	3.40825276606252e-54
ADAMTS14	112.162393286883	1.23159465184591	0.150223458078401	8.19841766126263	2.43571810792618e-16	5.93305972639723e-16
ADAMTS15	74.2261233048925	-0.0417259775233739	0.155766068977967	-0.267875910313151	0.788794837033959	0.860886420443989
ADAMTS16	19.6877266116719	-0.29329844109805	0.159862382842538	-1.83469328983383	0.0665511470907441	0.0839373537430693
ADAMTS17	75.1282488404331	-0.90970418685924	0.109762552276819	-8.28792851468129	1.1523780020778e-16	2.83595147550444e-16
ADAMTS18	26.8476245982167	1.20862764614679	0.225054850215878	5.37036924548594	7.85755881566239e-08	1.39022124600924e-07
ADAMTS19	26.1409696791997	-1.94476499732416	0.168444231592829	-11.5454532276601	7.78301233492497e-31	3.15248576859864e-30
ADAMTS2	52.0348525613998	0.916516199495124	0.141820374087151	6.46251432767982	1.02977391954294e-10	2.04814988051024e-10
ADAMTS20	30.5889318299141	-3.913818349085	0.242855366882982	-16.1158404663581	1.97460916036436e-58	2.03338583822872e-57
ADAMTS3	83.0767229844293	2.00425394689903	0.162054947010708	12.3677430641263	3.90644158966398e-35	1.81394686418152e-34
ADAMTS4	541.204583053469	0.243148111135415	0.12437629368319	1.95493935327224	0.0505902289182757	0.0645542393206938
ADAMTS5	163.209161409198	-0.52382797420611	0.0884872021167804	-5.9198162183362	3.22301574712128e-09	6.02961883306769e-09
ADAMTS6	185.106821967271	-0.635170607243061	0.0913873036449526	-6.95031565556144	3.64469775539107e-12	7.65266853141798e-12
ADAMTS7	103.835253830675	1.14360875664225	0.137201574506971	8.33524513659389	7.73377935671509e-17	1.91705274713222e-16
ADAMTS8	165.921309718367	-1.04756761386901	0.108190759122105	-9.68259787036634	3.57513821431014e-22	1.07264968703299e-21
ADAMTS9	595.158697020514	0.629878597894067	0.0957802647313959	6.57628791965114	4.823381454527e-11	9.71389724404031e-11
ADAMTSL1	116.681020855964	0.342876844195089	0.14568208069616	2.35359656147557	0.0185927781262982	0.0245513349851858
ADAMTSL2	488.984580248127	-0.867242882132382	0.0651673004534619	-13.3079454894976	2.08126445253318e-40	1.16775842747142e-39
ADAMTSL3	78.791386671944	-1.76065428999415	0.132075655716424	-13.3306496223225	1.53554690939129e-40	8.6745928711495e-40
ADAMTSL4	112.257397264391	1.70563413599019	0.115185811954357	14.8076755899941	1.30681720770368e-49	9.98267341360698e-49
ADAMTSL5	7.5390191330297	-0.115406582573069	0.13621134329754	-0.847261173549807	0.396849562862551	0.460232193566041
ADAP1	711.146477163038	-1.39584223963378	0.104260184191529	-13.3880661199445	7.10055660134533e-41	4.068044321054e-40
ADAP2	341.800381957247	0.810948719826911	0.0798521519278386	10.1556276224059	3.12791083158659e-24	1.01099912627655e-23
ADAR	6687.73204990018	-0.201167707310667	0.0354993861266957	-5.66679397194952	1.45494110196983e-08	2.65061092402792e-08
ADARB1	436.044785487308	-0.751637056087152	0.0740948775410485	-10.144251276625	3.51463118233552e-24	1.13414510707207e-23
ADARB2	189.72744630435	-2.94790147239739	0.132075889326326	-22.3197548578596	2.37588713678611e-110	1.32668199190172e-108
ADAT1	215.288231793554	0.124882273117921	0.0516096014407903	2.41974883803731	0.015531230311191	0.020628179461222
ADAT2	109.04531245678	0.0571056802555763	0.0571252224426764	0.999657906153106	0.317476089572285	0.37313699297945
ADAT3	37.3598017970765	0.818494546422737	0.087688536992804	9.33411109926381	1.01842198233995e-20	2.91189657520911e-20
ADC	479.032854503704	-0.460111436136366	0.0560933240554837	-8.2026059942758	2.35231177470651e-16	5.73059804719272e-16
ADCK1	312.771247355959	-0.523402868055792	0.0446683033420024	-11.7175453038447	1.03631385537684e-31	4.32663217252213e-31
ADCK2	867.861426221276	0.463279806830655	0.0409062489456825	11.3254042785938	9.82246469099843e-30	3.83364279522862e-29
ADCK4	802.826958060975	0.292225818525698	0.0480914688255675	6.07645858323915	1.22865718823192e-09	2.33896777511969e-09
ADCK5	126.62725545456	-0.353779220550942	0.06177018716902	-5.72734577576891	1.02014105905674e-08	1.87017998831793e-08
ADCY1	1192.43382880789	-1.25660083074202	0.138634867164246	-9.06410383221475	1.25632714643199e-19	3.4526789163623e-19
ADCY10	1.37163786741663	0.43108010609829	0.142959395076765	3.01540242155343	0.00256638501991734	0.0035844043014036
ADCY2	3341.12340151857	-1.3188794052816	0.0912920385078494	-14.4468173439702	2.6253991737206e-47	1.84616132744461e-46
ADCY3	974.878828270349	0.0481465518007136	0.0423896666155217	1.13580869218452	0.256036638449295	0.304099118273239
ADCY4	81.0488011047445	0.0307925724564191	0.0792907852669567	0.388349949527508	0.697757077729675	0.773019056000629
ADCY5	426.498377342019	-1.57631132016929	0.0922503460336536	-17.087321489225	1.84453831045224e-65	2.41348402165641e-64
ADCY6	1057.77342765766	0.0484836600971502	0.0428067292046474	1.13261772151203	0.257374823326086	0.305487163810132
ADCY7	753.385011671875	-0.413000400935867	0.0572101503531074	-7.21900569019278	5.23690643748894e-13	1.1351689044324e-12
ADCY8	1079.15970039373	-1.00361376903862	0.115313073667761	-8.70338234093229	3.22136347999061e-18	8.42441797676172e-18
ADCY9	566.624618340473	-0.182829276910524	0.0534866623131202	-3.41822183332753	0.0006303171073616	0.000914631141148452
ADCYAP1	39.6822103294324	-0.0725478313869007	0.18029060682743	-0.402393849926646	0.687394195447433	0.762433702795125
ADCYAP1R1	1808.14391500295	-1.83266827542755	0.119519947319576	-15.3335766667241	4.56162094650865e-53	3.94180523202445e-52
ADD1	9194.71972543338	-0.579504312281115	0.0280182490883975	-20.6831023042439	4.91745381390336e-95	1.66630234107703e-93
ADD2	1063.06837048439	-0.699226830779033	0.0722926614349705	-9.67216888823507	3.95897394464077e-22	1.18583772294672e-21
ADD3	5160.4333995223	-1.05559740695349	0.0646048305413225	-16.3392953453892	5.1848650395227e-60	5.62559275744162e-59
ADH1A	0.0618060274203393	-0.268702993701021	1.01836089226171	-0.263858319523887	0.791889093925906	0.864168318683911
ADH1B	18.3995001906757	-1.55681364594493	0.173087556941302	-8.99437067260055	2.37589457720749e-19	6.46142930497793e-19
ADH1C	0.201830148639356	-0.29306790623595	0.46904469109287	-0.624818725808633	0.532090039065103	0.603479851492592
ADH4	0.458786818612335	1.88066593974811	0.508476409882124	3.69862967720389	0.000216766595048986	0.000322207874449313
ADH5	2522.69016813371	0.472308160782974	0.0317579591094155	14.8721194317221	5.00048852868156e-50	3.87660086445266e-49
ADH6	0.181754247844878	0.391809144707026	0.493638264096088	0.793717126901571	0.4273601273435	0.492819069478197
ADH7	0.470151056747093	0.912008109346632	0.4358448510198	2.09250632928826	0.0363932461647862	0.0470043861561478
ADHFE1	463.55110608741	-1.57334196730508	0.0793487322904525	-19.8281928631945	1.70039960217136e-87	4.59223723621837e-86
ADI1	1427.89993051694	0.406248870278706	0.0481598904327449	8.43541932152091	3.30017417113695e-17	8.30932968302398e-17
ADIG	2.76362519293913	0.946656977969811	0.225223630632651	4.20318674071038	2.63183289942939e-05	4.12352383539273e-05
ADIPOQ	0.249074002517721	-0.324505152357717	0.512672126531901	-0.632968198511033	0.526754410444953	0.597985936512295
ADIPOR1	1832.21531340944	0.454481064949005	0.0401467450568862	11.3204959531595	1.03882543019688e-29	4.05207329846375e-29
ADIPOR2	3117.3962914499	-0.918831857945754	0.0539734055674224	-17.0237888138811	5.47128726997779e-65	7.0564298993344e-64
ADK	402.937007690459	0.284323544105149	0.047749643652028	5.9544642087203	2.60925221102204e-09	4.89895875914851e-09
ADM	410.190062829047	2.98290868169903	0.146875113854408	20.3091497491936	1.0673606139332e-91	3.30082518720714e-90
ADM2	15.4464967675974	1.81335065629537	0.1614617904868	11.2308345573786	2.8774771822979e-29	1.10436070057486e-28
ADNP	2289.78298251759	-0.0423705929323925	0.0340308620951393	-1.24506375459834	0.213108316005273	0.255593305189529
ADNP2	643.682343426458	0.107674532315408	0.0443070262533605	2.4301909069612	0.0150908717118689	0.0200621252729111
ADO	1056.05346971248	-0.561563414342456	0.0358572366049092	-15.66109013168	2.79072385028071e-55	2.58627951772391e-54
ADORA1	1439.77826098273	0.552306264429829	0.0958163518461958	5.76421721123749	8.20377046667087e-09	1.51094808102589e-08
ADORA2A	106.471534802822	-0.2790152129235	0.0559864330264	-4.98362188553668	6.24049723986189e-07	1.06102904868155e-06
ADORA2B	93.7574683159264	1.00994331492308	0.0927633545462039	10.8873091089008	1.32497427263441e-27	4.80603202313485e-27
ADORA3	952.654643034615	0.910630547892801	0.0982160494331677	9.27170816937052	1.83188288147924e-20	5.18985484630028e-20
ADPGK	710.268571740481	0.847553331091456	0.0374065610821347	22.6578789007217	1.16665407722755e-113	7.27251062040303e-112
ADPRH	162.650247700562	1.21655825944151	0.0747653529400966	16.2716848326288	1.56783727404734e-59	1.67814461573652e-58
ADPRHL1	52.8513344535965	-0.586679148876649	0.0862028812860306	-6.80579512104686	1.00492642211081e-11	2.07788218060942e-11
ADPRHL2	739.525077001881	0.524803400245908	0.044375769169022	11.8263505077961	2.85277428826091e-32	1.2075708886653e-31
ADRA1A	56.1016735914264	-1.5807434183383	0.126203520616799	-12.5253511994965	5.42506766027853e-36	2.60264076064137e-35
ADRA1B	86.014829741797	-0.864052863138088	0.1208519183758	-7.14968264261421	8.69787504629602e-13	1.86842194454623e-12
ADRA1D	48.5940056759488	1.02647081277477	0.139677887778162	7.34884260567447	1.99930441304885e-13	4.40798702923672e-13
ADRA2A	107.411124283017	-0.803162348319242	0.134011285618046	-5.99324411086081	2.05695723410563e-09	3.88112157354616e-09
ADRA2B	18.2279332893411	0.00205303965881725	0.120427195402721	0.0170479736902589	0.986398343852038	0.999641322860956
ADRA2C	34.8548034698869	-1.21312096111457	0.117237129096436	-10.3475833165165	4.29182434359844e-25	1.4272241899539e-24
ADRB1	84.03920332074	-0.59933199185729	0.104745523750214	-5.72179096919229	1.05406945541527e-08	1.93130777472011e-08
ADRB2	85.8225066296288	-0.759293064625583	0.0902720585845794	-8.41116372586288	4.05962583360915e-17	1.01659882389634e-16
ADRB3	0.912922854606417	0.0251473534366874	0.288806968214059	0.0870732226171516	0.930613309783012	0.989091611164476
ADRBK1	1908.25278465887	-0.27292374126531	0.0403323844840303	-6.7668635206375	1.31604110137941e-11	2.70845958810673e-11
ADRBK2	696.424644365694	-1.26765083308238	0.0695982511247192	-18.2138317069314	4.00883038908445e-74	7.13348696614192e-73
ADRM1	1591.20209809183	0.188606147041168	0.033288428542364	5.66581708118609	1.46325560236992e-08	2.66526838241101e-08
ADSL	752.470243216841	0.750444516043631	0.041026120122595	18.2918714663034	9.60598433021563e-75	1.73899020436406e-73
ADSS	676.713181310962	0.0677479174157057	0.0407021816555494	1.66447877386614	0.0960167894355415	0.119414067192468
ADSSL1	105.660349216994	1.1664818555055	0.0872022539283654	13.3767397395913	8.2695866552437e-41	4.71735298609772e-40
AEBP1	4887.32420910356	1.53022544450342	0.149093066953018	10.2635587004567	1.02845228704608e-24	3.37477399207324e-24
AEBP2	514.90169555914	0.0441633930991662	0.0382247424159878	1.15536143104772	0.247942449195483	0.295086645677357
AEN	542.013676327247	0.854528334339112	0.0795344547775491	10.744127645423	6.31561193276886e-27	2.2392125799191e-26
AES	6850.2254992925	0.240432850951954	0.0534948541039924	4.49450428417955	6.97321996433254e-06	1.12840930084052e-05
AFAP1	1818.72519332788	-0.749612422660481	0.06017359672131	-12.4574973660335	1.27303123121672e-35	6.00411565462978e-35
AFAP1L1	282.011612478239	1.47961374746364	0.0955962244152216	15.4777425208442	4.9038090142072e-54	4.35520636597801e-53
AFAP1L2	983.096434261964	-0.929079395243182	0.105595018871984	-8.79851535771335	1.3863803248292e-18	3.67311109049577e-18
AFARP1	2.88090004585346	0.157944541429065	0.0725215014426206	2.17789949583478	0.0294135200630575	0.0382763873307943
AFF1	989.601783173031	-0.155432138057478	0.0538504654635702	-2.8863657299792	0.00389718995827181	0.0053846794830154
AFF2	297.402649809106	-2.50012395091794	0.141455149556613	-17.6743226298549	6.6129911417372e-70	1.01227276758808e-68
AFF3	646.483782508431	-1.2044862330576	0.0825160092484302	-14.5970005581737	2.93475797876174e-48	2.13567207830375e-47
AFF4	2703.19655481997	-0.481694848086733	0.0401172684901795	-12.0071696358053	3.25805907394587e-33	1.42759737008906e-32
AFG3L1	281.260141421077	-0.0781291708957614	0.0589527468370932	-1.32528465741654	0.185076755760565	0.223406194704766
AFG3L2	1113.67305198298	-0.300869145033122	0.0330896382398862	-9.09254863567699	9.67441638960584e-20	2.66948713935352e-19
AFM	0.0299518604287366	-0.143230102744508	3.39376039627614	-0.0422039525541255	0.966336111686991	0.999641322860956
AFMID	334.262591598926	-0.0449943562378261	0.0681560264204571	-0.660166952225973	0.509146697393084	0.579547228390646
AFP	3.20758125510229	2.08462222213788	0.395797647603288	5.26688886293562	1.38755149409207e-07	2.43002325889099e-07
AFTPH	784.512910037778	-0.327837160693794	0.0290611622930169	-11.2809376785515	1.62999225398386e-29	6.31327402319697e-29
AG2	838.221517935796	-0.282874919608707	0.0917345444101841	-3.08362483759502	0.00204495293479148	0.00287379823908871
AGA	382.104893230362	0.672500581509273	0.0542429289051981	12.397940064863	2.68128030064397e-35	1.25179037681737e-34
AGAP1	618.087277037892	-0.130946198573272	0.0632213069419689	-2.07123523551116	0.0383368182803363	0.0494244763768929
AGAP11	12.5683298335126	-0.272371834227867	0.110669469878382	-2.46112893219045	0.0138500583691702	0.0184596051268783
AGAP2	2547.73074558713	0.0940126339805291	0.132920804047846	0.70728306719156	0.479390586103865	0.548511375950183
AGAP3	2882.5053642681	-0.561158421206883	0.047446974714809	-11.8270643087332	2.82862440959698e-32	1.19760405107734e-31
AGAP4	270.357585624555	-1.31220909486879	0.0693309373267298	-18.926746780948	6.8674701238025e-80	1.45286937314981e-78
AGAP5	39.5368871513048	-0.216948721466171	0.0610840282335728	-3.55164398517733	0.00038283246763398	0.000562806882668969
AGAP6	164.549934854019	-0.154100212079226	0.0658441572373666	-2.34037792485821	0.0192642350656923	0.0254058234120962
AGAP7	19.1639452010134	-0.0570519424544455	0.112754277346298	-0.505984728891692	0.612867370159554	0.687036695055864
AGAP8	52.8153504276576	-0.136605889643962	0.0898610447142492	-1.52019031248031	0.128463151458233	0.157826157505829
AGBL1	0.366479878613921	-1.22521366549046	0.354797362353668	-3.45327726610646	0.00055381944605419	0.000806343215507324
AGBL2	12.8097857587239	1.32180068687865	0.16509430088048	8.00633746791518	1.18175156086299e-15	2.81662392581304e-15
AGBL3	14.4065742396383	0.605332313409476	0.0733945029324408	8.247651925195	1.61537066084211e-16	3.95717901753253e-16
AGBL4	36.2845423572471	-0.449704127710671	0.136058565015326	-3.30522468512008	0.000949002888121109	0.001361812961577
AGBL5	581.83946448983	0.351645927067473	0.0323476342890686	10.8708390828539	1.58734217528064e-27	5.74404599134503e-27
AGER	101.835840338479	-0.1597380144504	0.0886768580981549	-1.80134950511652	0.0716478096019712	0.0900960752182108
AGFG1	1930.11999375449	-0.00926148981182096	0.0271800925636871	-0.3407453374237	0.733295304617782	0.808203462511777
AGFG2	1064.02100861616	-0.30683537701664	0.0662389510658631	-4.63224993873387	3.61713098789494e-06	5.93219058269557e-06
AGGF1	1103.7928375054	-0.0294980176444717	0.0267579030749339	-1.10240393508655	0.270286101537098	0.319930974226396
AGK	728.392050631709	0.282780333188764	0.0339893852848274	8.3196660021679	8.82115309928709e-17	2.18195305574205e-16
AGL	558.83707434059	-0.0322869043690529	0.0505792787765298	-0.638342521879432	0.52325073780926	0.594270618516842
AGMAT	25.4826316313752	0.36925164081642	0.101535911214345	3.63666053123728	0.000276195539974155	0.00040888903576607
AGPAT1	3005.62805172143	-0.0423735470485307	0.0259813372264743	-1.63092248405725	0.102906676821675	0.127558720274891
AGPAT2	235.757237670026	0.606350977908303	0.0763478457261512	7.94195267909978	1.9902287311456e-15	4.70230085071503e-15
AGPAT3	3297.36512899046	-0.508743963761698	0.0407627000321358	-12.4806247711909	9.52364126203936e-36	4.51535854430534e-35
AGPAT4	1088.69842725727	-0.693686229344486	0.0551953713958304	-12.5678333491002	3.17300763907329e-36	1.53411049827682e-35
AGPAT5	2700.3037845459	0.0771632998398628	0.0379123387194472	2.03530835728374	0.0418198557919736	0.0537959118341526
AGPAT6	1939.29861731616	-0.255129276064639	0.0321202662727615	-7.94293776701948	1.97448023136679e-15	4.66564806608462e-15
AGPAT9	16.7480543079306	1.21131092025442	0.150829988114547	8.03096874432222	9.67059905463803e-16	2.30964198867578e-15
AGPHD1	17.9958648196333	0.333881855400144	0.0762061342465269	4.38129894268138	1.17973876269027e-05	1.88459678401235e-05
AGPS	967.068752108762	-0.0869362713959822	0.0288892429171788	-3.00929559300725	0.00261854214406116	0.00365519054444929
AGR2	0.860742325849045	-2.01054527880855	0.55550205832912	-3.61933002526761	0.000295366747667826	0.000436553462497712
AGR3	3.18670116362523	1.53924656523712	0.650860069135017	2.36494238659126	0.0180328759760263	0.0238405829313571
AGRN	4604.65199197713	0.235656854949583	0.0624213594652828	3.77525989450212	0.000159840923339012	0.000239676749118701
AGRP	0.485312766348316	1.50251133150815	0.23617778318999	6.36178099063397	1.99427666883128e-10	3.92655407292834e-10
AGT	13578.1216796925	-0.184193053287467	0.0904187690929243	-2.03711082483516	0.0416389373756871	0.0535730701536943
AGTPBP1	570.26346228724	-0.536237523673947	0.0565251035213087	-9.48671457933373	2.38430591838846e-21	6.95571688303375e-21
AGTR1	9.47330061039795	2.67586576467853	0.158306258503712	16.9030952406457	4.2689743506606e-64	5.31557026087595e-63
AGTR2	0.0463895040430582	0.221735573718498	1.96985603143309	0.112564355049431	0.910375945937859	0.972588648683707
AGTRAP	586.448309726973	0.971334036387102	0.0712002958546954	13.642275284493	2.24446873782897e-42	1.35688026196962e-41
AGXT	1.07297419849607	3.81643690016051	0.554458628299878	6.88317704039117	5.85322080010433e-12	1.2185296778037e-11
AGXT2	0.0383608480038997	-0.158486266270036	1.79522232838186	-0.0882822499277231	0.929652346372412	0.988282214948267
AGXT2L1	2440.22222904041	-2.72839425058105	0.149916045931901	-18.1994811404005	5.20989070966468e-74	9.21281565902613e-73
AGXT2L2	406.771931777024	0.434910234701035	0.0487223385080326	8.92630050237293	4.40492853421948e-19	1.18736603663085e-18
AHCTF1	1120.04221629271	-0.574495088648987	0.0458937130185337	-12.5179474673793	5.95553637899607e-36	2.85436648067793e-35
AHCY	2495.58063215745	0.758438020570517	0.0384064596957465	19.7476681417348	8.40082354233123e-87	2.21743708494849e-85
AHCYL1	13714.7368913555	-0.617653473182157	0.0861529325618584	-7.16926812373656	7.53997581317727e-13	1.62320743423776e-12
AHCYL2	2726.66295979042	-0.401173290725966	0.0655386952859107	-6.12116687669565	9.28925543266745e-10	1.77759349784503e-09
AHDC1	1475.53407085587	-0.289865607446266	0.051172731269477	-5.66445449080734	1.47492999335562e-08	2.6857925094882e-08
AHI1	345.514637012614	-0.134427293579863	0.0503842202980672	-2.66804354189876	0.00762943698440325	0.0103623384269836
AHNAK	10058.491591504	-1.52730715415438	0.0863399407223229	-17.68946262155	5.05552401925543e-70	7.76865524292251e-69
AHNAK2	359.4628812242	0.781285135005983	0.138826160167565	5.62779474749542	1.82528096773412e-08	3.31220657482546e-08
AHR	516.923567510638	1.40965313768027	0.104882142459976	13.4403541405364	3.50753982063537e-41	2.03661282555521e-40
AHRR	55.4415761920366	-0.031436673017113	0.0830288732375349	-0.378623384749263	0.704967554334517	0.780266433812011
AHSA1	1799.16526288817	-0.310924936168487	0.0327440935060835	-9.49560372195738	2.18938996377642e-21	6.39650364803832e-21
AHSA2	606.027012822004	-0.235172809009071	0.081248587517312	-2.89448489130917	0.00379781185969943	0.00525212951687051
AHSG	4.40771379678933	-0.970776758684979	0.163552697522039	-5.93555944593434	2.92845190648914e-09	5.48735250423803e-09
AHSP	0.545427488854327	0.778097127525187	0.351563695129919	2.21324652773843	0.0268806539335495	0.0350908925205631
AICDA	0.0584205159078185	0.10927159041561	1.07059290683508	0.102066424798799	0.918703950928693	0.97963141574576
AIDA	894.619013167568	0.308676248147781	0.0363510311769109	8.49154035398707	2.03916097393234e-17	5.17438402281883e-17
AIF1	823.52602480774	0.770184364240349	0.0978640768009386	7.86993950606564	3.54812777110639e-15	8.30886435991045e-15
AIF1L	3603.10332192206	-0.0789484122008754	0.0709376403970607	-1.1129269561121	0.26573980178655	0.314850283355136
AIFM1	574.837679941423	-0.0349623580386238	0.0305493814851314	-1.14445387562561	0.252435456008746	0.300109634428534
AIFM2	205.604162591556	0.00377125918495864	0.0537503029077693	0.0701625661799485	0.944064268728839	0.999262387815665
AIFM3	341.454128025151	-1.76416510793929	0.16129422974765	-10.9375587130388	7.62248261962409e-28	2.78474885677863e-27
AIG1	846.059266333673	0.329871956538583	0.0448884982117423	7.3486966523708	2.00148837104863e-13	4.41182074716968e-13
AIM1	109.715202145189	1.92823237447036	0.144946480144869	13.3030645003808	2.22172173578461e-40	1.24550876607631e-39
AIM1L	0.163841294564807	0.818873848596942	0.589709864067316	1.38860463168964	0.164953008173728	0.200285647496497
AIM2	21.0159911833619	0.467766428489971	0.119030259151755	3.92981105664572	8.50126368256165e-05	0.00012945195112876
AIMP1	956.751000680617	0.139083615034399	0.0275289022290392	5.05227610884115	4.36575969243907e-07	7.48184095990487e-07
AIMP2	580.332828077338	0.311607132567677	0.0392400723851473	7.94104377558751	2.00486896956221e-15	4.7357623431401e-15
AIP	1284.43651574331	-0.306880848502239	0.0463156938807955	-6.62585017709267	3.4525521809474e-11	6.99437321235771e-11
AIPL1	0.294499819782661	0.21214364489518	0.35645748444432	0.595144313566286	0.551747009704411	0.623964150425179
AIRE	8.22087112665923	0.190488512434131	0.163037562130412	1.1683719380063	0.242656769192185	0.2891922322969
AJAP1	99.1630100449168	-1.7331907948183	0.11752670221251	-14.7472086103835	3.20655471083842e-49	2.41594580132839e-48
AK1	1589.07775451564	-0.231093891946152	0.0708442530214424	-3.26199913317185	0.00110629481853124	0.00158043255893231
AK2	1422.19953818306	1.0237213094988	0.0516894387261164	19.8052316823003	2.68325671570822e-87	7.16849027971483e-86
AK3	1732.55716532412	-0.0889499791398717	0.0431160369839278	-2.06303698953198	0.0391091139472459	0.0503906380095064
AK3L1	286.206819120481	1.45701001723404	0.0935065842600809	15.5818975611545	9.66427417013243e-55	8.76773029174074e-54
AK5	965.211212750589	-1.75341523146753	0.157052066808345	-11.1645473192484	6.08001287428994e-29	2.30535759768649e-28
AK7	13.589401940586	0.719112811469699	0.198449511397017	3.62365624590049	0.000290467599059931	0.000429568726959491
AKAP1	1420.95885399507	-0.801065257562748	0.0407354190713178	-19.6650795751058	4.2949309182143e-86	1.10282921750987e-84
AKAP10	472.352323737401	-0.093359569475456	0.0381244281311062	-2.44881232459151	0.0143328107579288	0.0190850613054626
AKAP11	2587.58691808636	-1.18917498601265	0.0526757447793789	-22.5753805853768	7.56556707132923e-113	4.5863069129957e-111
AKAP12	2201.31025177416	0.854840660885612	0.0992499343410598	8.61300983785098	7.11669842102834e-18	1.83547115274583e-17
AKAP13	2000.21446191443	-0.402133688451249	0.0475865963292823	-8.45056632478243	2.8989317347333e-17	7.31765233383652e-17
AKAP14	4.72533248839443	2.40261139058117	0.306406367608813	7.84125803040938	4.4605478275841e-15	1.04098704481045e-14
AKAP2	319.614531684883	0.182405950450186	0.0990210709234322	1.84209228146231	0.0654616526390676	0.0826263190235108
AKAP3	87.4919705684364	-0.87992820752716	0.070931003530586	-12.4054103809166	2.44258082986584e-35	1.14250306253966e-34
AKAP4	0.0100422331697693	0.0194414610782696	3.39376039627614	0.00572858976715094	0.995429271669032	0.999641322860956
AKAP5	177.114951341117	-1.21414397937757	0.120485578173364	-10.0770897047161	6.97618185859814e-24	2.23010567622949e-23
AKAP6	2429.90812317532	-1.664998934088	0.068062287690369	-24.4628705644227	3.67150700675486e-132	4.04334907749454e-130
AKAP7	537.569847377028	-0.369297819609806	0.0563909413471235	-6.54888552642761	5.79680428514212e-11	1.16388181246199e-10
AKAP8	609.875016955059	0.0214110012257993	0.0271561099318325	0.788441396044773	0.430438565065692	0.49625355794447
AKAP8L	1229.72515500123	-0.424151708249801	0.0373715414694447	-11.3495909339622	7.45104706781953e-30	2.92190120722822e-29
AKAP9	1198.00248374839	-1.02909435285836	0.0540112735438543	-19.0533250807869	6.16584597159249e-81	1.35354999662102e-79
AKD1	168.381653372119	-0.57449241176888	0.0603453731334389	-9.52007390025631	1.73055951909255e-21	5.07618842068238e-21
AKIRIN1	1702.78256084537	0.339598515317016	0.0407250283149757	8.33881594115764	7.50381060007797e-17	1.86121168074757e-16
AKIRIN2	1166.71230840012	0.286116971567168	0.0301561174335187	9.48785838223152	2.35829395262029e-21	6.88185794535433e-21
AKNA	807.405079205918	-0.668618548151345	0.0562879830603698	-11.8785309367763	1.53033177696643e-32	6.55624958176045e-32
AKNAD1	24.4816854031592	0.925046893431432	0.148639602453958	6.22342147152857	4.86428338156365e-10	9.4192331222757e-10
AKR1A1	1495.68289156412	0.424750845367792	0.0413312567348098	10.2767464365549	8.97048060726023e-25	2.95091000792764e-24
AKR1B1	2780.55736307818	0.402893785087598	0.0358268824570208	11.2455719687841	2.43513093855118e-29	9.38223529541305e-29
AKR1B10	3.46747198275145	1.13607801745462	0.329771672402704	3.44504429133405	0.000570965825947491	0.000830514790707155
AKR1B15	0.835043250144297	0.546609886812416	0.385328928307013	1.41855398506935	0.156029089216422	0.189868915625361
AKR1C1	372.147632529913	-2.08966501281626	0.137583831347037	-15.1883036862475	4.22717741867144e-52	3.52229247458276e-51
AKR1C2	78.4819171088818	-0.825407479955358	0.141642547606102	-5.82739786812336	5.62982821088958e-09	1.04328395460843e-08
AKR1C3	632.004967609545	-1.55295637989628	0.108020963494592	-14.376435181251	7.27462421589788e-47	5.05449967864506e-46
AKR1C4	0.225750552892183	-0.334454891784882	0.70108854084669	-0.477050860624491	0.633325904912295	0.70776972674915
AKR1CL1	0.00427292726907357	-0.0505059696208893	3.39376039627614	-0.0148820080746737	0.98812631381088	0.999641322860956
AKR1D1	0.131727030596269	0.646084480653254	0.64836025678276	0.996489951218171	0.319012147136848	0.374875676844729
AKR1E2	3.99063527690213	-0.060624054988897	0.143681037497913	-0.421934975168714	0.673072480407336	0.747971509088161
AKR7A2	909.036158817126	0.0216658021061817	0.0463458589627036	0.46748086217621	0.640155881213929	0.714918875115702
AKR7A3	22.6654010927872	-0.529139656398996	0.0965377702653726	-5.48116716332317	4.22529013201468e-08	7.55392553092777e-08
AKR7L	18.8675469850356	-0.52110952398719	0.0805237015549674	-6.47150483552309	9.70316529047808e-11	1.93331837926572e-10
AKT1	3279.92287967466	0.2838973847867	0.0395227297807948	7.18314211496226	6.8127217939537e-13	1.4688773561186e-12
AKT1S1	1040.84865714746	0.157514639609298	0.039376642165392	4.00020496790195	6.32876443491115e-05	9.7026370760436e-05
AKT2	2123.6905258436	0.361608237572047	0.0462453604112748	7.81934088860264	5.31006329599069e-15	1.23575234463986e-14
AKT3	1365.26137855701	-0.916457030293018	0.0627371162884765	-14.6078921778773	2.50137769439305e-48	1.82632817811983e-47
AKTIP	1098.49243599533	-0.542605886439002	0.0371391194687927	-14.6100902283088	2.4219700462912e-48	1.7696539707936e-47
ALAD	1835.93929953491	-0.601954405437356	0.0510006405015416	-11.8028793269598	3.77180643058487e-32	1.59251371402522e-31
ALAS1	952.663900569931	0.190202621072929	0.03366404358428	5.65002301630061	1.60426355516162e-08	2.91728432749003e-08
ALAS2	6.94032025897068	0.987186669930268	0.284070642796848	3.47514498580641	0.000510577313931035	0.000745135396749975
ALB	15.9852972209925	-1.65880317112768	0.142787106945772	-11.6173176038762	3.36537193666238e-31	1.37777298431347e-30
ALCAM	4059.94330463796	-1.1304044172428	0.0642911617591488	-17.582578791741	3.34987842308207e-69	4.97785906902218e-68
ALDH16A1	377.15289742085	0.313621127093257	0.0585482741780314	5.35662462294977	8.47910233058719e-08	1.49831739614218e-07
ALDH18A1	1162.72535895063	-0.1659106680779	0.0423253156688456	-3.91989204229426	8.85886433781371e-05	0.00013475235402738
ALDH1A1	898.905655705285	-0.739151567348904	0.113488922586266	-6.51298426757954	7.36722293186644e-11	1.47515616341806e-10
ALDH1A2	56.8525293156685	-0.138434463346358	0.113766066817399	-1.21683439727729	0.223667229838288	0.267771198036259
ALDH1A3	79.5138845415778	1.25131357415311	0.222917651724869	5.61334449950835	1.98452943289041e-08	3.59591654005363e-08
ALDH1B1	513.434097056878	0.0542328592509544	0.0440406371921109	1.23142767018524	0.218162953316111	0.261386776886387
ALDH1L1	2348.51342836687	0.0185882718952516	0.106800205669571	0.174047154485468	0.861828403807077	0.930046515796597
ALDH1L2	443.065067457577	-1.11910151074781	0.0829724489588996	-13.4876278185082	1.84956245387536e-41	1.08505109568426e-40
ALDH2	6965.78076341159	-1.52738787071177	0.0657241346350063	-23.2393759034485	1.82184062567973e-119	1.3628055367113e-117
ALDH3A1	18.7531851252585	1.4329728248403	0.20509876801292	6.98674516050739	2.81336585529958e-12	5.93606720059645e-12
ALDH3A2	2194.09688779746	0.00228667907574216	0.0416591754764504	0.0548901664420794	0.956225966111601	0.999641322860956
ALDH3B1	240.512283936602	0.475184742487312	0.0782061592046641	6.07605267052896	1.23176965743534e-09	2.34466774719999e-09
ALDH3B2	0.390990098482885	-1.22737412125261	0.372362112697645	-3.29618422336439	0.000980077244536397	0.0014049805625141
ALDH4A1	2350.4031298437	-0.465679152727955	0.0789133494078736	-5.90114544905494	3.6098648221508e-09	6.7355374971287e-09
ALDH5A1	2580.53587888544	-1.5745342332953	0.058740245802234	-26.8050331044992	2.82293420332711e-158	7.0834208496903e-156
ALDH6A1	1232.72274537069	-1.1295912951787	0.0730114851495583	-15.4714192276026	5.41010145792649e-54	4.79626302327713e-53
ALDH7A1	2249.96382460776	-0.416337217445944	0.0820139217440815	-5.07642127814707	3.8461003862716e-07	6.60955769025244e-07
ALDH8A1	21.5744366843997	-0.289673325113227	0.103779275454783	-2.79124443530578	0.00525058035758611	0.00720441990921502
ALDH9A1	3191.70460919762	-0.156525271256879	0.0420516541680915	-3.72221436596064	0.000197483250787069	0.000294339133861058
ALDOA	21562.9480906974	0.291629870809987	0.0471613896625453	6.18365728611245	6.26332670486489e-10	1.20764444383364e-09
ALDOB	7.34083765278069	-1.0486122382848	0.105231879044393	-9.96477728809186	2.17360471902432e-23	6.81654269027355e-23
ALDOC	19906.8414737927	-1.61807662918337	0.0960371658892342	-16.8484421026084	1.07714974419944e-63	1.31967486892865e-62
ALG1	424.799974511319	0.588678548825536	0.0427426905563394	13.7726133091597	3.72491013042943e-43	2.30242885922989e-42
ALG10	57.5526177991952	0.216892796189469	0.0521717864343436	4.15728137778876	3.22057228145512e-05	5.02055711979277e-05
ALG10B	309.278253596313	-0.396231134459654	0.0430795123718653	-9.19766990488099	3.65795506094054e-20	1.02489955014875e-19
ALG11	12.815718849075	0.0438159168075778	0.067638932170645	0.647791374012758	0.517119895288773	0.587846523931033
ALG12	310.683037468585	0.375434149220921	0.0373223449768277	10.0592325978986	8.36478158439053e-24	2.6666945215081e-23
ALG13	500.754228274372	0.154421274072478	0.0314803324970746	4.90532538329538	9.32725867324235e-07	1.5739699385348e-06
ALG14	175.261789533443	0.969249850844261	0.0490841154762288	19.7467111598184	8.56150216605898e-87	2.25684384890674e-85
ALG1L	22.9657309722809	-0.90314928865789	0.124606457891051	-7.2480134974028	4.22928476428869e-13	9.20983322888e-13
ALG1L2	0.0342231434104992	0.110233696902258	1.80083830853491	0.0612124344422349	0.951190027051104	0.999641322860956
ALG2	492.727765215687	0.617531031067282	0.0311073133432255	19.8516350240117	1.06672925201775e-87	2.90065486457445e-86
ALG3	484.922798545432	0.829244316807269	0.0397082192867937	20.8834425643222	7.57337962209396e-97	2.71477584536652e-95
ALG5	456.305626457837	0.831820023769063	0.0429678374018707	19.3591317149429	1.70739030040442e-83	4.01489892347767e-82
ALG6	228.365598199821	1.09277511433668	0.0567802376229252	19.245694630476	1.53393474755777e-82	3.5112226906279e-81
ALG8	551.184997716005	0.527730612955789	0.0297716679781637	17.725933707942	2.64485391988628e-70	4.10885103870734e-69
ALG9	599.894563655659	0.105444950221407	0.0273962936246608	3.84887648183515	0.000118660818434526	0.000179311892348498
ALK	140.397953588569	-0.400315090043773	0.131861916051573	-3.03586586658732	0.00239846037496574	0.0033553055760724
ALKBH1	219.492551644263	0.246446763110363	0.0317632937734236	7.75885413107144	8.57001496702805e-15	1.98160978293943e-14
ALKBH2	471.117387250366	0.0599936935825712	0.0495491372118415	1.2107918918159	0.225975173480625	0.270452566799881
ALKBH3	283.092822863552	0.193756697891545	0.0373599248058811	5.18621755526244	2.14608094924872e-07	3.72226464755948e-07
ALKBH4	485.962539931387	0.0620266643432673	0.0354094400277479	1.75169853843103	0.0798256583510333	0.100049571667459
ALKBH5	2016.78483109555	0.0690028692894551	0.0261928701148568	2.63441421222168	0.00842825991462819	0.0114113377698022
ALKBH6	128.417034090895	0.43401088121103	0.0547027912615128	7.93398053741339	2.12231370918355e-15	5.00602387638571e-15
ALKBH7	727.638102775339	0.224044351366882	0.0581368235176153	3.85374256471025	0.000116325906144224	0.000175890803775511
ALKBH8	230.098974547459	-0.334074075673382	0.0364475644976581	-9.16588200824357	4.91434279849929e-20	1.37033362350051e-19
ALLC	0.754386157111548	0.534601090391394	0.291295732074455	1.83525205324584	0.0664683516931905	0.083843597557373
ALMS1	547.98228875586	-0.738903291796501	0.0482729894257699	-15.3067647267366	6.89073000606817e-53	5.92602780521862e-52
ALMS1P	7.11235453490734	-1.48530677688905	0.112947662182404	-13.1503985845264	1.69279745156045e-39	9.16589016178171e-39
ALOX12	5.23306258689781	0.0431655475886854	0.0550022776990733	0.784795637461622	0.432573398337225	0.498511858336074
ALOX12B	9.31563959990739	-3.32574419110252	0.202819932798978	-16.3975214132369	1.99201084037664e-60	2.1876803816502e-59
ALOX12P2	6.06856302295994	1.1514681358993	0.177990260429384	6.4692760891607	9.84735300429363e-11	1.96145577375515e-10
ALOX15	2.17384199344793	-0.475879895708709	0.302985646099607	-1.57063511699252	0.116267428101053	0.143384921441283
ALOX15B	98.4369444907427	0.185352673141386	0.191189286885661	0.969472066979539	0.332309710520212	0.389370811658717
ALOX5	321.896342964057	1.08975607573302	0.106819475000223	10.2018482653163	1.9453468673597e-24	6.33004119364271e-24
ALOX5AP	699.573233720408	2.06942951915646	0.117588479071144	17.5989139029888	2.51093336534887e-69	3.75654581896684e-68
ALOXE3	7.18367253613233	-1.46218775464601	0.158212176184843	-9.24194199147921	2.42063334201574e-20	6.82660616571034e-20
ALPI	0.00442971128158044	-0.0734471880676568	3.39376039627614	-0.0216418307398035	0.982733665231247	0.999641322860956
ALPK1	160.233043216976	0.858979235525796	0.0917469851184226	9.36247915304319	7.78872920036481e-21	2.23503154225292e-20
ALPK2	32.7051275538024	2.96296200474912	0.201810477761369	14.6819037228219	8.41930716032935e-49	6.22978446581593e-48
ALPK3	263.37722969345	0.623313463326973	0.0917124197346898	6.79639099186485	1.07272402983001e-11	2.21529413931872e-11
ALPL	521.69598523392	-0.728602746480026	0.0765444583881005	-9.51868707184285	1.7538075348829e-21	5.14361987926968e-21
ALPP	0.0645273401158754	-0.222815988091397	1.69270600106332	-0.131633011256195	0.895274573504602	0.959869537053476
ALPPL2	0.0322464618595202	-0.079870380689125	2.55926669190224	-0.0312083070286666	0.975103415091732	0.999641322860956
ALS2	821.832050832492	-0.32488915675689	0.0303046506203993	-10.72076892839	8.13244068604315e-27	2.87258324517879e-26
ALS2CL	59.2663412920488	0.217913566156682	0.108326227180374	2.01164179560906	0.0442577102234309	0.0567939211452001
ALS2CR11	3.2299273923441	-0.465844706603488	0.115902223488697	-4.01929050695837	5.83736593097271e-05	8.97078105664564e-05
ALS2CR12	8.15908098597206	-0.268280763022995	0.137477748016698	-1.95144863000236	0.0510037013850478	0.0650441567521747
ALS2CR4	853.884736360939	0.428083670436476	0.0423162476626519	10.116295609412	4.67786322237092e-24	1.50217532248597e-23
ALS2CR8	241.267104803235	-0.64604751174422	0.0480815577587716	-13.4364929477843	3.69539502610872e-41	2.14255090969737e-40
ALX1	0.791848537120997	1.885795023381	0.638988203900052	2.95122040105136	0.00316520969702059	0.00439598905794431
ALX3	51.4171645444596	0.255725029789409	0.0761199870900869	3.35949912191606	0.000780838994354884	0.0011262057177748
ALX4	2.35225886768209	0.271500797088959	0.280879245684468	0.966610389554931	0.333738838824643	0.390929799800325
AMAC1	0.0545886156790574	-0.264372135340208	1.09850818572511	-0.240664693058886	0.809815005594331	0.880917678532427
AMAC1L2	1.08133543865246	0.170325964326547	0.118306881251879	1.43969617425649	0.149953376232078	0.182879646674571
AMAC1L3	0.725808238021671	-0.792552229735009	0.200373900720284	-3.95536657661512	7.64173870268956e-05	0.00011660548556956
AMACR	337.875312411386	0.0947324510804889	0.0437666802018562	2.16448793108304	0.0304269218604346	0.0395458216653157
AMBN	0.0921218334930462	0.414255722938245	0.998856135158047	0.414730118139283	0.678339481717086	0.753233449813903
AMBP	0.417798290640738	0.267418236793557	0.59656761190665	0.448261406513302	0.653964550124629	0.729025940677118
AMBRA1	888.841204131341	-0.296105694800677	0.0300466316748669	-9.85487152120153	6.53001559183559e-23	2.01784098327291e-22
AMD1	2015.79801121565	0.324820268191869	0.0451731913340637	7.19055392367048	6.45289849887765e-13	1.39265984695974e-12
AMDHD1	14.2634050834811	0.402748677580291	0.0942835836968667	4.27167341109114	1.94011571578674e-05	3.06469948474305e-05
AMDHD2	219.536789760658	-0.0486196081578632	0.0503998591689711	-0.964677460602828	0.334706388013788	0.391877900277439
AMELX	0.0490222144679434	-0.122390866985524	1.35313376851875	-0.090449939121321	0.927929673610408	0.98708612395917
AMELY	0.00140239221340583	-0.0395972480769345	3.39376039627614	-0.0116676616653265	0.990690764114807	0.999641322860956
AMFR	3655.42484578386	0.019300512719362	0.0309943569537514	0.622710538830068	0.533474755948205	0.604808126231699
AMH	127.453762772837	-0.543891049872609	0.134155941388495	-4.05417042468199	5.03125279397431e-05	7.75540623133381e-05
AMHR2	0.044731359664922	-0.128958306539656	2.70958171247358	-0.0475934370039462	0.962040262616213	0.999641322860956
AMICA1	40.7407759955914	0.993448883652296	0.161160100046844	6.16436005787744	7.07687505314139e-10	1.36000866871955e-09
AMIGO1	249.76990752274	-0.570395769273715	0.0874134294989951	-6.52526473955895	6.78815277793117e-11	1.36113243492747e-10
AMIGO2	147.791114470157	1.17817086024922	0.134492812153997	8.76010279939865	1.95072392617452e-18	5.14286479432869e-18
AMIGO3	147.102568726987	0.349261219494462	0.0509207367684118	6.85891920776612	6.93834627045594e-12	1.44155579204746e-11
AMMECR1	121.136551693239	0.515785666691068	0.0529382404759155	9.74315848154657	1.97323943140463e-22	5.97913868063803e-22
AMMECR1L	680.789848866718	0.0157577184744606	0.0264777652343327	0.595130228514457	0.551756423992482	0.623964150425179
AMN	0.912915233528487	-0.34478575316593	0.211302393953312	-1.63171721207338	0.102739072427527	0.127366893854338
AMN1	388.390723428128	-0.310525766869241	0.050345473256356	-6.16789845808109	6.92035586938132e-10	1.33044529530352e-09
AMOT	1953.62747529843	-1.18745815034871	0.0876487091836281	-13.547925136706	8.15014288429539e-42	4.83568639315736e-41
AMOTL1	1543.54796782771	-0.553045529061483	0.0559667213241851	-9.88168532971564	4.99850649543123e-23	1.55306260593939e-22
AMOTL2	2362.62405747528	-1.19196044217212	0.078663317140941	-15.1526847010085	7.27337223983836e-52	6.0200441716207e-51
AMPD1	0.0603083261152836	-0.0108877802708527	1.69427177710067	-0.00642623008776345	0.994872645519073	0.999641322860956
AMPD2	1681.80416117765	-0.390907633897578	0.049229635164966	-7.94049422847978	2.01377224175117e-15	4.75509316834228e-15
AMPD3	347.353058813071	0.134030312834861	0.0878987661442781	1.52482587315119	0.127302534716891	0.156487544691363
AMPH	691.731703777325	-0.917784392987169	0.111219004837135	-8.2520464405444	1.55704888269305e-16	3.81666625468336e-16
AMT	246.761003095238	-0.0133458432863959	0.0902367938635446	-0.14789802158283	0.882423249584669	0.948759346776422
AMTN	0.0486834767654402	-0.226169289683029	3.39376039627614	-0.0666426804706653	0.94686616714785	0.999641322860956
AMY1A	2.09132252916372	-3.2306638995048	0.210733405243327	-15.3305732224773	4.77751876048039e-53	4.12656881869293e-52
AMY2A	2.66904143104218	-3.20400678557441	0.203463452197534	-15.747333248154	7.16392394869672e-56	6.73993661295753e-55
AMY2B	218.258416922531	-1.18708309655906	0.0909563177826556	-13.0511340553126	6.26084441430815e-39	3.32731149664425e-38
AMZ1	217.919100588056	-2.24159804800269	0.109601250530335	-20.4523035746045	5.73042383874061e-93	1.85006826963119e-91
AMZ2	1791.36768350801	0.139179657943289	0.0313937923967086	4.43334963117997	9.27802237129756e-06	1.49126925700342e-05
AMZ2P1	452.593938672257	0.0977775907990739	0.0595980498371954	1.64061728640742	0.100876884358639	0.125183578229704
ANAPC1	438.584000330713	0.0592220512611565	0.0424151602069012	1.39624726093857	0.162640049281077	0.197624184632738
ANAPC10	112.116419114642	0.492061284265621	0.0322694137050602	15.2485349985909	1.683684912941e-52	1.42570209437119e-51
ANAPC11	1713.13203276569	0.650796025458895	0.0513544954657111	12.672620372513	8.38653123496196e-37	4.13034058809071e-36
ANAPC13	1370.24027932905	0.157745714405429	0.0308428888182357	5.11449220386136	3.14586082102849e-07	5.42500209267054e-07
ANAPC16	1235.59480998413	-0.0740285952283986	0.0399457315717366	-1.85322917657558	0.0638495174293286	0.0806866832560378
ANAPC2	1055.79090257397	-0.519636423167436	0.0376156369738224	-13.8143725581216	2.08765280863348e-43	1.30300823758002e-42
ANAPC4	458.197442943658	-0.0201018718542945	0.0298766452890381	-0.672828949161503	0.50105611825383	0.571071914872447
ANAPC5	2411.28167973696	0.0979541517457325	0.0298769879126929	3.27858189828157	0.00104330085626909	0.00149237645214477
ANAPC7	1181.80157041543	0.360145863482514	0.0267505678674014	13.4631109615207	2.57828043544642e-41	1.50454086169721e-40
ANG	68.4644479474779	1.86053861992158	0.106991761212375	17.3895503619991	9.90079036960974e-68	1.397887232883e-66
ANGEL1	863.742130842337	-0.579166456690295	0.0473813922801082	-12.2235001721011	2.32839427248309e-34	1.0559542361801e-33
ANGEL2	768.549338017761	-0.31878373207739	0.0279885956503268	-11.3897723222732	4.70216747004498e-30	1.85383981222557e-29
ANGPT1	184.901695339794	1.09457657557433	0.13677450361663	8.00278229224911	1.21638893572799e-15	2.89743786024224e-15
ANGPT2	454.120295712658	1.91911192930688	0.126231019167167	15.203172262797	3.36903154228558e-52	2.82744759791393e-51
ANGPT4	3.93770644447949	-1.49187638769849	0.177744122995595	-8.39339361862034	4.72307020569583e-17	1.17975580503413e-16
ANGPTL1	134.740818333121	0.256071140886894	0.133757729369077	1.91443995120699	0.0555639649288812	0.0706189957546459
ANGPTL2	4158.91114830512	-1.15204814466475	0.0935588462057334	-12.3136206931349	7.65120954463191e-35	3.51739162345172e-34
ANGPTL3	0.0781185000594341	-0.104740644458083	0.838247695031579	-0.124951902735787	0.900561627873853	0.964390532620786
ANGPTL4	665.94690930961	1.84912578439078	0.121172956858742	15.2602183880551	1.40776383052809e-52	1.19461054848281e-51
ANGPTL5	2.00739613855412	-0.165685816482212	0.166342074242203	-0.99605476988921	0.319223534465505	0.375079611386978
ANGPTL6	18.7645406437592	1.02734281278074	0.111043127630378	9.25174600809506	2.2085500467824e-20	6.23647971187572e-20
ANGPTL7	2.15531443359625	0.157180723538124	0.262037233349939	0.59984118107451	0.548612085289663	0.620727018647089
ANK1	281.191137077333	-1.78208143949385	0.116623141218926	-15.280684612572	1.02854483996019e-52	8.77316883069316e-52
ANK2	5805.05534706688	-0.788500596817716	0.0647674748675031	-12.1743297608989	4.25878040915589e-34	1.9178056349545e-33
ANK3	977.898496714899	-1.94468586521003	0.115569789461583	-16.8269395857684	1.54904614392634e-63	1.88616349576486e-62
ANKAR	22.8895685381878	-0.238842908441355	0.0635994015409748	-3.75542697972523	0.000173046209401213	0.00025890972971245
ANKDD1A	232.690927799014	-0.238878123544038	0.0620883634267914	-3.84738959701684	0.000119383045610888	0.000180389520020171
ANKFN1	85.9200518709289	-0.997753812821058	0.0909926593420477	-10.9652121394808	5.6168675509283e-28	2.06038426095581e-27
ANKFY1	3892.13925937938	-0.557282139121486	0.0380047820913762	-14.6634741328498	1.10472753345665e-48	8.13787212772619e-48
ANKH	1900.70994337159	-0.264761006188699	0.0565143948398723	-4.68484192282111	2.80176083149953e-06	4.61788517193108e-06
ANKHD1	1646.11895764869	-0.336388733093947	0.0356806112792126	-9.42777382544244	4.18884636498263e-21	1.21148966286914e-20
ANKHD1-EIF4EBP3	389.977501039468	0.236960489843672	0.0592161597295147	4.00161866162971	6.29106317054796e-05	9.6470755186642e-05
ANKIB1	2742.13040990616	-0.144518649888476	0.0476388814286183	-3.03362811121041	0.00241632092363506	0.00338005290164545
ANKK1	3.22416466289546	1.68307684182953	0.215464556774944	7.81138609069485	5.65624557830234e-15	1.31492618856207e-14
ANKLE1	29.4520641685603	0.0519425044007992	0.0820983875846872	0.632686048154341	0.526938682581873	0.598150690306389
ANKLE2	1180.60406125148	0.00745329142980196	0.0228870466736488	0.325655447645998	0.74468505578552	0.819419616899457
ANKMY1	171.053068822966	-0.347152526188245	0.0425466975305636	-8.15932954464601	3.36889335332661e-16	8.16500463907486e-16
ANKMY2	702.611250731059	0.281142744080379	0.0390635071440584	7.19706868724257	6.15207762793933e-13	1.32860480246913e-12
ANKRA2	336.404889569683	-0.133833798785368	0.0338503413902847	-3.95369125653129	7.69546972815304e-05	0.000117389223871626
ANKRD1	3.23422830424782	1.60289936663641	0.261657173896981	6.12595230149317	9.01428098386845e-10	1.72564067545364e-09
ANKRD10	1802.93974963497	0.101361538209072	0.0624701982895911	1.62255829154237	0.104683862618142	0.129680552973342
ANKRD11	2497.89761799556	-0.612875262825824	0.0343162393649096	-17.8596278079505	2.43255919120095e-71	3.92676065530752e-70
ANKRD12	1068.50272520797	-0.929284835558561	0.0422727834952999	-21.9830528941129	4.18361533888401e-107	2.04769893488143e-105
ANKRD13A	1006.83447891364	-0.248822596429862	0.0325871058507572	-7.63561506718094	2.24744877024367e-14	5.11435850907361e-14
ANKRD13B	756.775616463095	-0.842437621525239	0.0592792928899817	-14.2113304740113	7.79306981670845e-46	5.22958777849057e-45
ANKRD13C	619.470172687362	-0.140806977048835	0.0295851254172556	-4.75938415210196	1.94184541108925e-06	3.22875369770359e-06
ANKRD13D	620.899367285532	-0.17554116790604	0.0411983878589012	-4.26087468536983	2.03628391169235e-05	3.21200413634737e-05
ANKRD16	201.447214177937	-0.812434442479402	0.0471374837618055	-17.2354223781818	1.43997729522823e-66	1.95914000846323e-65
ANKRD17	2191.54294729595	-0.272953967449169	0.0425866650497326	-6.40937643580247	1.46116014831777e-10	2.892986178596e-10
ANKRD19	61.5641964461776	-1.90124747731355	0.086474187457264	-21.9863005738349	3.89474994331481e-107	1.91103039916657e-105
ANKRD2	6.6937433706362	-1.72464896856256	0.194432676131727	-8.87016011338605	7.30408064588845e-19	1.95607660961155e-18
ANKRD20A3	59.7071731938605	-0.37817149702991	0.116393491278128	-3.24907770079902	0.00115779847810071	0.00165234263724913
ANKRD20A4	6.02386664443255	-0.175661352557973	0.171112176981361	-1.02658592542544	0.304615484223644	0.358595685240531
ANKRD20B	20.5689642766768	-0.981957168545996	0.105117753875291	-9.34149686751267	9.49816686309862e-21	2.71809097339691e-20
ANKRD22	142.855631392673	0.454380539411645	0.150944817968464	3.01024272000232	0.00261038995125088	0.00364406760589058
ANKRD23	54.8175147692217	-0.820599551050853	0.0607124233249132	-13.5161719152482	1.25540479280277e-41	7.40431098117507e-41
ANKRD24	237.868388558432	-1.44045502905717	0.0965836314549272	-14.9140698828392	2.66971478545445e-50	2.08353370834896e-49
ANKRD26	248.509273730308	-1.50993322536966	0.0555762299578328	-27.1686875219008	1.52316066683965e-162	4.25262167588203e-160
ANKRD26P1	0.52633843507255	0.474196982596075	0.281221772326434	1.68620295176023	0.091756715566619	0.114352657656047
ANKRD27	540.767389100276	-0.158125527975605	0.0371490462140236	-4.25651649478724	2.07636724328954e-05	3.27366800793196e-05
ANKRD28	1316.62995768405	-0.712886737905956	0.0462991016096707	-15.3974205356298	1.70329499408418e-53	1.49070272263712e-52
ANKRD29	50.8039803795007	-0.153264239817377	0.119728226213158	-1.28010114794913	0.200509564997798	0.241271161038688
ANKRD30A	0.00428269121879325	-0.0275647511741224	3.39376039627614	-0.00812218540954403	0.993519504914756	0.999641322860956
ANKRD30B	1.28163945084376	-1.78196521702067	0.321993169531661	-5.5341708633526	3.1270403131723e-08	5.62192273970746e-08
ANKRD31	0.812135241283502	-1.80443485436031	0.233072108975612	-7.74195961194619	9.78960902290869e-15	2.25763079646537e-14
ANKRD32	125.708806740648	0.397217732225557	0.0557891287204922	7.11998450837345	1.07939194869013e-12	2.30792650187515e-12
ANKRD33	0.36763929857588	1.02647015638652	0.306115842075092	3.3532082149957	0.000798805893419593	0.00115128175259972
ANKRD34A	127.602943786634	-0.877388418258456	0.11768244973822	-7.45555875332447	8.94877651331077e-14	1.99361201195054e-13
ANKRD34B	2.40014124169512	-0.212537514888584	0.251153927558102	-0.846244042269321	0.397416617192638	0.460835893688778
ANKRD34C	11.7416751988656	-2.68016245123173	0.243924398587565	-10.987676783262	4.38056731081247e-28	1.61315225343184e-27
ANKRD35	225.743977823536	0.247444965259649	0.124338693735241	1.99008818434704	0.0465812221586598	0.059630582295842
ANKRD36	205.746918604782	-0.863306947543239	0.0696081603106598	-12.402381325556	2.53671112849924e-35	1.18569263617638e-34
ANKRD36B	30.8133244835123	-0.773251373284521	0.0928913296333364	-8.32425777881233	8.48587599898071e-17	2.10111816047707e-16
ANKRD36BP1	79.2377090467761	-0.627720078966554	0.0912336005758328	-6.88036068953342	5.97012043602207e-12	1.24247451342011e-11
ANKRD37	99.2646901154307	0.525191555760885	0.0664442898174026	7.90423913332776	2.69575080950171e-15	6.33901166035023e-15
ANKRD39	164.619855927076	-0.0893578664606216	0.0515351979112609	-1.73391914812257	0.0829324298625873	0.103779405161673
ANKRD40	2583.57771298122	-0.355741080014142	0.0376211029795262	-9.45589182240989	3.20279945997308e-21	9.29562133163197e-21
ANKRD42	238.238700154081	-0.014237037425532	0.047105292218907	-0.302238596872935	0.762470183153541	0.836022260116856
ANKRD43	259.680955572035	-1.48038794413241	0.140950571314848	-10.5028871491808	8.37778155252964e-26	2.85495553920913e-25
ANKRD44	152.072584108401	-0.628652302619713	0.0753433848990677	-8.34382877092495	7.19231092815156e-17	1.78528899985911e-16
ANKRD45	78.7784540086667	0.67159535242423	0.124253786545212	5.40502926387563	6.4797812771101e-08	1.14963487206796e-07
ANKRD46	1291.96232430137	-0.70645849936401	0.0511102733386627	-13.822240681104	1.87152322101473e-43	1.16958401040905e-42
ANKRD49	194.771321230576	0.472560628576825	0.034394723005343	13.7393352027698	5.90151889490537e-43	3.62746694740184e-42
ANKRD5	23.1676139166355	1.17513950903827	0.131481050187831	8.93771009099407	3.97317820072729e-19	1.07259037822439e-18
ANKRD50	578.784291366694	-0.353102728398475	0.0544914491138857	-6.47996583207945	9.17433917342642e-11	1.82997509996812e-10
ANKRD52	1408.22975419447	0.0474247972009541	0.0429103847752017	1.10520559182591	0.269070514430131	0.318606105223612
ANKRD53	24.3722264505415	1.70715957289715	0.132025610988214	12.9305182541405	3.02771049680788e-38	1.56910601773131e-37
ANKRD54	534.777286668887	0.170204251165193	0.0366078587155968	4.64939106347342	3.32916462316024e-06	5.46887968397173e-06
ANKRD55	26.1776579369967	-2.30786665790366	0.168044048664806	-13.7337006352847	6.37902361306739e-43	3.91975775207176e-42
ANKRD56	25.6605211954136	-2.33460023210227	0.212699988747355	-10.9760242388884	4.98378131949462e-28	1.83256347795107e-27
ANKRD57	322.837585642649	0.031427519603422	0.0546125433960288	0.575463394471887	0.564977940478405	0.637856603379128
ANKRD58	20.6888503775375	0.524680741957326	0.104459066919863	5.02283580955055	5.09140685043166e-07	8.69685118449865e-07
ANKRD6	764.510147382968	-0.501847889042359	0.0557818618680726	-8.99661417234976	2.32785922481217e-19	6.33687907353085e-19
ANKRD7	4.83552595446651	0.86790581707838	0.135444201010957	6.40784773803765	1.47588188779859e-10	2.92096711879308e-10
ANKRD9	80.5452561183427	0.450382861218599	0.0906278062494789	4.9695880310596	6.70953039276829e-07	1.13940735865541e-06
ANKS1A	1024.6760648964	-0.651444937880977	0.037775608136323	-17.2451211249881	1.21757292982333e-66	1.66111136874658e-65
ANKS1B	759.507373870838	-1.51644693588102	0.105364567870702	-14.3923803468916	5.77727636363519e-47	4.02399681505061e-46
ANKS3	427.355861870048	-0.57820835293728	0.055258678574566	-10.4636659408539	1.26850743804257e-25	4.29839708449877e-25
ANKS4B	0.142715623639586	-0.277034809298244	0.636684237170207	-0.435121199999464	0.663474456029981	0.738298761753807
ANKS6	562.418812905303	-0.279618900833355	0.0488718561225282	-5.72147086315515	1.05605770845627e-08	1.93477189969766e-08
ANKZF1	650.539108727263	-0.436428852029623	0.0542535192629884	-8.04424962579991	8.67754774431086e-16	2.07622243736239e-15
ANLN	1563.5768319124	-0.707232186060891	0.112062243380593	-6.3110657499417	2.77120420520947e-10	5.41537667191122e-10
ANO1	45.8499158116272	1.20168144254015	0.113552019143396	10.5826514720327	3.58662218620224e-26	1.23841859601266e-25
ANO10	532.006995440158	0.161464834414209	0.0372101362303211	4.339270176674	1.42956682011725e-05	2.27251828991053e-05
ANO2	16.7214046174537	-0.402094699939358	0.0950323832997529	-4.23113349342258	2.32516618922253e-05	3.6534376481419e-05
ANO3	102.711067833347	-1.86268589377688	0.163119517212347	-11.4191479082915	3.35507201361134e-30	1.33068412416602e-29
ANO4	112.61548618762	-1.17547297428201	0.129131652218611	-9.10290354135654	8.79485251371925e-20	2.43220370228037e-19
ANO5	260.191575438886	-1.12332915358688	0.116168888057124	-9.66979345652772	4.05195011444922e-22	1.21240463575437e-21
ANO6	1571.46234700241	0.609774354541986	0.0707070827992811	8.62395011081105	6.46833073712385e-18	1.67020607271077e-17
ANO7	17.1396645009532	0.410057940346067	0.0993250280415118	4.12844525122799	3.65224374864454e-05	5.67608215048066e-05
ANO8	1047.4123928975	-0.788839331690409	0.0669732475829644	-11.7784243733025	5.04268747360888e-32	2.12096740482387e-31
ANO9	1.57653701154594	0.491601247580457	0.280818666687741	1.75060031934094	0.080014780241035	0.100280267352724
ANP32A	2569.58584448784	-0.337198106352598	0.031359550414312	-10.7526447891519	5.75863144681788e-27	2.04796109024526e-26
ANP32B	2229.4895697324	-0.245246134709209	0.0448437408533332	-5.46890446787917	4.52825719805647e-08	8.08026306931978e-08
ANP32C	1.87975579845097	-1.26861655881007	0.123436216847097	-10.2775068064629	8.90000811505579e-25	2.92918580217086e-24
ANP32D	0.0465549425680374	-0.185762569300727	1.07144894412724	-0.173375101369894	0.862356594949074	0.930565856378633
ANP32E	1653.53201385749	-0.160819310209359	0.0386605772490906	-4.15977519355694	3.18560986889516e-05	4.96800758642976e-05
ANPEP	128.910553192568	2.59091309881747	0.113669294135146	22.7934299982283	5.32749347583129e-115	3.49691732355642e-113
ANTXR1	4587.60393420957	-0.477915610535677	0.051751801285367	-9.23476282304416	2.5885885956419e-20	7.29196983535732e-20
ANTXR2	372.065430102072	1.04294908661754	0.0822745978859378	12.6764410087235	7.98771249540024e-37	3.93490121263218e-36
ANTXRL	0.271085919406922	-0.704562972096392	0.34707585063287	-2.02999710527733	0.0423568335284091	0.0544619258632453
ANUBL1	83.4771717265713	-0.257013390061296	0.0813232653398447	-3.16039191229292	0.00157557051630242	0.00223233037986298
ANXA1	2859.36580474675	2.14604054166192	0.156871795008309	13.6802191977739	1.33290288028427e-42	8.1173990156298e-42
ANXA10	0.0355123888032796	0.0818356903220772	1.40983705696637	0.0580462046430868	0.953711824562739	0.999641322860956
ANXA11	1043.97281632463	-0.0183472074738404	0.0721842184177979	-0.254172004296671	0.799362677861655	0.871077255964575
ANXA13	4.51474462525678	0.475100346422731	0.178317694495778	2.66434774050973	0.00771377774106878	0.010469716957289
ANXA2	2467.57525874813	2.1910342509854	0.117792908136592	18.6007314501879	3.16953526784074e-77	6.17187599355668e-76
ANXA2P1	22.8427245322798	3.12273861194002	0.115994166457359	26.9215143081181	1.22994731135062e-159	3.16639552635108e-157
ANXA2P2	1088.01037663948	2.77641881132807	0.127908568292528	21.7062769788681	1.78982067250979e-104	8.00894248107483e-103
ANXA2P3	1.0869938046591	0.915411038953186	0.220259270804449	4.15606133448933	3.23780936511865e-05	5.04703114293836e-05
ANXA3	46.5772147628861	-1.22960268022406	0.146209665775039	-8.40985904526958	4.10503743209391e-17	1.02771100045968e-16
ANXA4	507.823517042419	0.86349748863424	0.0616948221508833	13.9962716242611	1.64265013095583e-44	1.05481870897108e-43
ANXA5	7332.55553779503	1.36163799745563	0.0734647124154655	18.53458555388	1.08623365581451e-76	2.07841793042578e-75
ANXA6	4398.92846877244	-0.3115372190942	0.0450297525344087	-6.91847504283182	4.56531197638965e-12	9.54420790001814e-12
ANXA7	1987.05877403678	-0.309642622566552	0.0384896139244564	-8.04483576203928	8.63611653503243e-16	2.06705793375933e-15
ANXA8	2.40912385239997	-0.854472253428078	0.241650290026066	-3.5359868731625	0.000406254879683138	0.0005965326281451
ANXA8L1	0	NA	NA	NA	NA	NA
ANXA8L2	1.30056593019125	-1.24466623600393	0.293696938657306	-4.23792716973549	2.25592919396947e-05	3.54717890156714e-05
ANXA9	44.9271912555387	-0.533033582584798	0.054460180213983	-9.78758389139408	1.27301414424228e-22	3.88828341776805e-22
AOAH	203.651584357482	0.316514880504845	0.0970164507131171	3.26248670383538	0.00110439353434765	0.00157794385407045
AOC2	20.8725580988816	-0.627037884220859	0.0861314483050846	-7.28001092005141	3.33793155994869e-13	7.29765273109771e-13
AOC3	55.2312642648652	-0.152127302755092	0.101348279039953	-1.50103488876334	0.133346537938068	0.163582425988386
AOX1	42.7482007519274	2.29756065319681	0.169281742168985	13.572406709421	5.83733869573267e-42	3.48324999896173e-41
AOX2P	0	NA	NA	NA	NA	NA
AP1AR	389.772307042273	-0.0769797175383688	0.0386144216432274	-1.99354837551659	0.0462014318749579	0.0591711451128887
AP1B1	3995.41290767384	-0.252354539004136	0.0364870876166481	-6.91626971315172	4.63691203995831e-12	9.69082839937729e-12
AP1G1	2048.13125489345	-0.251317875558606	0.0262917187363333	-9.55882261174895	1.19103923037375e-21	3.51077630686971e-21
AP1G2	333.611935026633	-0.23549405565014	0.0674906487409448	-3.48928422001183	0.000484315896837419	0.000707956199617149
AP1M1	1764.81380620022	0.171328875478615	0.0277808054940836	6.16716730964127	6.95241848374204e-10	1.33647974789777e-09
AP1M2	0.768385299142037	-0.676832055844087	0.315060719230683	-2.14825909588723	0.031693178406665	0.0411511020865475
AP1S1	1354.74127599563	0.50599597241421	0.0508447905833431	9.95177611332273	2.47721938985477e-23	7.75764928358468e-23
AP1S2	1144.4188758773	0.960335149428755	0.0572910491694132	16.7623941846306	4.59732353605658e-63	5.51650995491826e-62
AP1S3	29.1186141024251	1.15615218554582	0.085327812743219	13.5495350036111	7.9733620892891e-42	4.73221427233467e-41
AP2A1	2813.2498570204	-0.146460357024173	0.0399969468776121	-3.66178842280967	0.000250460673587903	0.000371317173923641
AP2A2	2460.92035604774	-0.248879108792119	0.0361653664454613	-6.88169741532796	5.91435378767665e-12	1.23112711470245e-11
AP2B1	10612.0541833634	-0.671708495237738	0.0335759297838098	-20.0056558243588	4.91676723928055e-89	1.39435017144862e-87
AP2M1	8368.59012086949	-0.00963039900887264	0.0339044312675512	-0.284045437390645	0.776375560029506	0.849014879818222
AP2S1	1188.36466002354	1.04290453642053	0.0533123902738428	19.5621417659869	3.25129652666791e-85	8.13768321314874e-84
AP3B1	881.454640770748	0.124644166610691	0.0337217503653437	3.69625435394924	0.000218803765296548	0.000325187212436158
AP3B2	943.874860454957	-1.19479782137923	0.0816344329798162	-14.6359541895102	1.65635507793335e-48	1.2142724374953e-47
AP3D1	3777.03367135261	-0.228795114016063	0.0316429620557361	-7.23052139091978	4.81143194309352e-13	1.04476958492653e-12
AP3M1	1268.07660314298	-0.349902000916589	0.0325898811140364	-10.7365227781051	6.85788915990022e-27	2.4306085609995e-26
AP3M2	930.55252480949	-0.389266813854601	0.0466498859032026	-8.34443228140623	7.15567947380331e-17	1.77664121003511e-16
AP3S1	678.709210681599	0.472850848212029	0.0352685339650394	13.4071591600817	5.49018726849289e-41	3.15637999487629e-40
AP3S2	2039.12323796159	-0.156982549959706	0.0274127944128564	-5.72661610470776	1.02453652395416e-08	1.87789066244506e-08
AP4B1	381.682698765788	0.378321005923344	0.036834324557302	10.270882131551	9.53289548017573e-25	3.13072543246394e-24
AP4E1	248.227320054825	-0.189226010199116	0.0318310770533181	-5.94469391915818	2.76973904024981e-09	5.19535739921197e-09
AP4M1	418.205614661323	0.632571380476205	0.0413889940647243	15.283564985585	9.84068183109953e-53	8.40826879042611e-52
AP4S1	131.504634990265	-0.242373741383209	0.0493522525437607	-4.91109785046379	9.05678756243342e-07	1.52963022791273e-06
APAF1	520.802659675825	-0.158606246076388	0.0392340957276389	-4.04256153059891	5.28704323416642e-05	8.14083097956198e-05
APBA1	954.780895980769	-1.12897081197836	0.0754429826236843	-14.9645569768862	1.25154560088068e-50	9.8921006564026e-50
APBA2	3382.33250296178	-0.812607106440757	0.0479042714566443	-16.9631450751987	1.53882717676873e-64	1.95039457321525e-63
APBA3	279.157785443979	0.468088112234452	0.0439450428194113	10.6516704092888	1.71263910144137e-26	5.9854804139408e-26
APBB1	4052.09678815894	-1.04482627086171	0.052279841653276	-19.9852608160345	7.3999536064651e-89	2.08661849702642e-87
APBB1IP	653.383853000021	0.33857943736346	0.10059349687898	3.36581834679425	0.00076316948092694	0.00110144220024862
APBB2	2211.37567557148	-0.524203939173303	0.050789433178163	-10.3211220596706	5.65582804223002e-25	1.87484079065427e-24
APBB3	523.524822413063	-0.220128661916159	0.0618218222923859	-3.56069513569273	0.000369874322122498	0.000544039377267514
APC	3699.02345932939	-0.882667913643602	0.0514920411183448	-17.1418319117503	7.23353352333648e-66	9.5785126942618e-65
APC2	8240.1164811564	-1.1920552062587	0.0650580328353116	-18.3229518985961	5.42868150873888e-75	9.94394232257679e-74
APCDD1	2465.66620099878	-0.538174660001394	0.0645855037231854	-8.33274696297208	7.89878635119911e-17	1.95746520614852e-16
APCDD1L	29.1207221547946	2.23797983330728	0.401198037462209	5.57824222537003	2.42961178570558e-08	4.38675602769303e-08
APCS	0.0267569781685592	-0.160716960419298	3.39376039627614	-0.0473566020145816	0.962229016762981	0.999641322860956
APEH	1628.974021014	0.214453323008179	0.0325560399354006	6.58720542896828	4.48181985234832e-11	9.03795675819946e-11
APEX1	3240.05147525912	0.00810711097596078	0.0371189057623946	0.218409212487458	0.827110288273925	0.897515176508321
APEX2	359.798797528191	0.47352610905698	0.0311396375399426	15.2065388831065	3.20021120499718e-52	2.69032174370903e-51
APH1A	3855.48613342944	0.489641569853835	0.0268571020150315	18.2313627724909	2.90979210322391e-74	5.18712309911939e-73
APH1B	853.321525907153	-0.262955233921347	0.036507196070234	-7.20283292684168	5.89742186791194e-13	1.27485925504491e-12
API5	1935.41801145737	-0.0127136027174597	0.0258550612721083	-0.491725878490752	0.622913141379056	0.697115519762718
APIP	321.735651494704	0.0948567469766672	0.0369921367972687	2.5642408141092	0.0103401774874692	0.0139115880503666
APITD1	181.243219132927	0.868054426936033	0.055950381599518	15.5147186153152	2.75841297033625e-54	2.47197198512547e-53
APLF	31.7713365738907	0.637203150722426	0.0640720434450137	9.94510423675297	2.64896557145029e-23	8.28501806924252e-23
APLN	1688.5777979951	1.14428519546238	0.0929932436127351	12.3050358392454	8.50986467981327e-35	3.90850434541099e-34
APLNR	3861.25806220899	0.137709248663888	0.139306784695189	0.988532245326053	0.322892050402116	0.379030562866178
APLP1	6726.78894532691	-0.79083226700104	0.087282335492302	-9.06062220425791	1.29708524833067e-19	3.56271593150325e-19
APLP2	12225.0157165855	0.124307732991871	0.039423358790279	3.15314921930303	0.00161519219522453	0.00228699677756684
APOA1	3.99202783988352	0.424612440082019	0.146700814534448	2.89441092354884	0.00379870673010607	0.00525300059371417
APOA1BP	1748.25613502382	0.553692275342871	0.0494371406964611	11.1999251482298	4.08078147538301e-29	1.55653898761819e-28
APOA2	0.292328277583813	-1.16867906061153	1.40847420412212	-0.829748288744805	0.406681113287723	0.470697711724326
APOA4	0.118079923917671	-0.00510519443252794	1.27437006980473	-0.00400605330703523	0.996803640466009	0.999641322860956
APOA5	0.147649624588584	0.0518499774430285	0.513113058612746	0.101049810704897	0.919510919278376	0.980340179253227
APOB	7.0779216750559	0.312280634826483	0.19372908166165	1.61194505310197	0.106973897099867	0.132393304751867
APOB48R	165.444905723598	0.30765415325979	0.0937447238146994	3.28182900050903	0.00103136129580601	0.00147583014269562
APOBEC1	0	NA	NA	NA	NA	NA
APOBEC2	2.1833608217253	-0.403368733771007	0.0927963053476705	-4.34681889822819	1.38126173616736e-05	2.19749208636e-05
APOBEC3A	3.50693844737685	1.06160666699862	0.169291244686968	6.27088937151833	3.58991622459524e-10	6.9856591067195e-10
APOBEC3B	39.1158457384002	1.72450594784893	0.119650522376418	14.4128576591054	4.29562490176302e-47	3.00254486698337e-46
APOBEC3C	133.442465918189	1.52893035307218	0.100739510895842	15.1770674631624	5.01716141088107e-52	4.17352877246728e-51
APOBEC3D	16.0602685675104	1.47012542587269	0.111245695709814	13.215121865996	7.17699873514255e-40	3.94317200462114e-39
APOBEC3F	50.0072465862835	1.29886092271248	0.0977085754083067	13.2932131830269	2.53455807234005e-40	1.41767902562068e-39
APOBEC3G	133.704702614957	1.58787220951746	0.101791690282134	15.5992321683271	7.36748790651086e-55	6.71165959424471e-54
APOBEC3H	2.99335401687437	1.24067419792037	0.156800983794236	7.91241335289365	2.52446567261005e-15	5.9425820007302e-15
APOBEC4	0.231630501899399	0.786464035952082	0.85806740218502	0.916552748594569	0.359377054419278	0.419301433181481
APOC1	2430.86911669378	0.573465286273268	0.098762246059028	5.80652333413439	6.37833870294682e-09	1.17978732955598e-08
APOC1P1	1.97818563298762	0.581399700518384	0.184032158373075	3.15922883075551	0.00158187232458613	0.00224109884864715
APOC2	891.818047420021	1.52491826248714	0.121137407502854	12.5883349654087	2.44782261217573e-36	1.18871111320822e-35
APOC3	0.115791896697412	-0.481413936377406	2.41499040247372	-0.199344037096083	0.841993633740805	0.911221259029535
APOC4	2.93321672660696	0.0994749448991646	0.147849620566048	0.672811634675291	0.501067134912802	0.571071914872447
APOD	5164.33516540366	-0.792744639989742	0.113360890976992	-6.99310523371453	2.68867678728468e-12	5.67660453236172e-12
APOE	50894.1261224495	-0.835307072311629	0.0876559310946176	-9.52938451375278	1.58218473487838e-21	4.64646637029541e-21
APOF	0.181146035342582	0.144905710812766	0.529203638797874	0.273818432431663	0.784224157761729	0.856511045692053
APOH	1.92319121699161	0.607519943610198	0.420571575385257	1.44451023123398	0.148595503861555	0.181312856890779
APOL1	382.402467889183	1.30683262717903	0.116325874235779	11.2342386056798	2.76870418144595e-29	1.06343776378227e-28
APOL2	1279.46322494477	0.0847668896848382	0.0737814778146206	1.14889118781029	0.250600851764574	0.298035798207893
APOL3	267.221880400304	0.112559627668149	0.072858418346688	1.54490901974495	0.12236827143113	0.150608856611157
APOL4	436.934559619355	2.0634873627273	0.16131182050112	12.7919166513465	1.81930990941837e-37	9.20474230076581e-37
APOL5	0.146834287371223	-0.0978326008960823	0.492094171686182	-0.198808696637992	0.842412392856082	0.911475403285089
APOL6	747.423206299072	0.509046805718335	0.0856174826387881	5.94559417106381	2.7545583214008e-09	5.16786007998563e-09
APOLD1	1849.14701067609	-0.679061206976391	0.0848789884959825	-8.00034518564664	1.24070898352283e-15	2.95465811873775e-15
APOM	87.521523081107	-0.204942707785548	0.0601972504109813	-3.40451941552735	0.000662805883276174	0.000959807219240529
APOO	435.712627764303	0.278805658000916	0.0417023688714257	6.68560721000077	2.29969088623957e-11	4.68710389038936e-11
APOOL	142.264263100082	-0.356794362747146	0.0746809059212969	-4.77758482366505	1.77413217917355e-06	2.95460154480024e-06
APP	30495.7568252643	-0.167399517869463	0.043511390337463	-3.84725738642585	0.000119447464760878	0.000180473101673391
APPBP2	1508.22350130343	-0.298801525775562	0.0298485498116397	-10.0105877056393	1.36936620612951e-23	4.33002812316244e-23
APPL1	1509.00409188322	-0.446711809308944	0.0340360206356834	-13.1246779431263	2.37791513456181e-39	1.28160445112612e-38
APPL2	1863.81099327923	-0.404658000258788	0.0397253083903771	-10.1864029923254	2.28046329024582e-24	7.40468858354509e-24
APRT	770.384684152302	0.370412098828043	0.0491986410225196	7.52890915540724	5.11659641446101e-14	1.14930641046867e-13
APTX	496.878046497148	0.179506619224813	0.0329988214853769	5.43978879077119	5.33437736651089e-08	9.49222284886404e-08
AQP1	16356.1154826884	1.17681031993305	0.159749594614766	7.36659346629903	1.75043233636664e-13	3.8657330886582e-13
AQP10	0.0734299865695478	0.123551829308336	0.948741907030798	0.130227017898899	0.8963868194006	0.960854156760834
AQP11	77.2742450367266	-0.17557744929687	0.0471787751154234	-3.72153471274568	0.000198015638400362	0.000295088257405682
AQP12A	0.0323836475207396	-0.0623910415450649	1.58234320744422	-0.0394295253087592	0.968547940414576	0.999641322860956
AQP12B	0.757336461716567	-1.87204309385254	0.360615205464606	-5.19124835970422	2.08888765357443e-07	3.62592118711085e-07
AQP2	0.315554069926662	0.685255980974951	0.476905223332714	1.43688084644206	0.150751853155483	0.183808216576525
AQP3	42.129087094627	0.235717856692782	0.141851992565732	1.66171692359946	0.0965695462245772	0.120041268878773
AQP4	26943.4726176334	0.0897887407951166	0.109319339079893	0.821343611760195	0.411450572790975	0.475940053943835
AQP5	47.263523171041	2.00981951071503	0.268758397368976	7.47816451649608	7.53678127935834e-14	1.68282963844019e-13
AQP6	117.638247044375	-0.638739666376616	0.0996197351248198	-6.41177840491444	1.43831801806238e-10	2.84918337883987e-10
AQP7	1.81489473972541	-2.80907076798935	0.197692618646033	-14.2092850366809	8.02405332651492e-46	5.38276849717446e-45
AQP7P1	28.4729203017335	-0.0446682147472851	0.216292732912542	-0.206517408818107	0.836386767558723	0.906384635697614
AQP7P3	2.94488965816162	-1.32432724970633	0.278181952764525	-4.76065120884151	1.92969293213905e-06	3.20881662560124e-06
AQP8	1.21613235337246	-0.327457390401981	0.1901041508644	-1.72251573105078	0.0849761356170726	0.106263054273103
AQP9	63.075007474912	3.09147946169343	0.177220695381987	17.4442350258809	3.80782546795087e-68	5.4539396135253e-67
AQPEP	4.77559125223985	0.463987602689527	0.104727746990035	4.43041711509058	9.40509916220096e-06	1.51083695860867e-05
AQR	704.978759898661	-0.214506591130824	0.0422591570896982	-5.07597893340648	3.85506007062951e-07	6.62380651643311e-07
AR	76.8997151690955	-0.181221159943785	0.134887242895261	-1.34350110547149	0.179109768316097	0.216519876651421
ARAF	842.51587251048	0.426311109445243	0.0355262122718042	11.9999032315525	3.55712068140241e-33	1.5565740235638e-32
ARAP1	2315.53199447974	-0.509546709083066	0.03743687627877	-13.6108233306854	3.45331407684267e-42	2.07880488749627e-41
ARAP2	1297.10984610881	-0.713977717689211	0.0750342318879301	-9.51535985276155	1.81085056917528e-21	5.30542282482435e-21
ARAP3	466.73825940546	1.64357409896362	0.0965257051049163	17.0273203099338	5.15095547476933e-65	6.65194725578843e-64
ARC	1320.09267154884	0.693385083892713	0.138068555602243	5.02203474837721	5.11269304918208e-07	8.7309540242881e-07
ARCN1	2780.74298263085	0.100852636264552	0.0286336243846348	3.52217501039341	0.00042802147931489	0.000627703616516909
AREG	13.1733902481899	3.68857909466152	0.304929681839381	12.096490811952	1.10222983223413e-33	4.89899147183346e-33
ARF1	6871.32598774213	0.36716459991493	0.0267107318952626	13.745958042432	5.38553936944087e-43	3.31133830398345e-42
ARF3	7972.79082541285	-0.420616000105471	0.0424948302843251	-9.89805106388722	4.24465965693857e-23	1.32111616234092e-22
ARF4	3261.87458516571	0.955631690892056	0.0370714782700014	25.7780842709302	1.56172964166944e-146	2.715628656738e-144
ARF5	2785.72301660276	0.520518246181631	0.0413493294934235	12.5883116499971	2.44854563785071e-36	1.18877100610127e-35
ARF6	1219.18471781115	0.320903468985542	0.0309635115178958	10.3639236396063	3.61808826768501e-25	1.2064148651021e-24
ARFGAP1	2164.95114433947	-0.435873652907213	0.0458222714247854	-9.51226640134317	1.86553060211429e-21	5.46239484870184e-21
ARFGAP2	2652.67473514538	-0.703873833293557	0.0333484489313733	-21.1066438124914	6.91094383995407e-99	2.63453153345018e-97
ARFGAP3	928.968261247681	0.0872304470069079	0.0299068817568325	2.91673494134771	0.00353716220010501	0.00489884484683027
ARFGEF1	1025.49512926824	-0.341974991692952	0.0328351090668122	-10.4149187078108	2.11978605805545e-25	7.13179209586443e-25
ARFGEF2	965.18648345586	-0.596269105989436	0.0457713562202236	-13.0271234070618	8.57810803228192e-39	4.54055635577903e-38
ARFIP1	649.229485778008	0.434801397825825	0.0314697936626358	13.8164680228605	2.0277778213778e-43	1.26603589773771e-42
ARFIP2	1075.7540530092	0.159725266845903	0.0343121819457718	4.65506003373198	3.23886321460798e-06	5.323272158459e-06
ARFRP1	793.15446973577	-0.348711838751883	0.0425443099372182	-8.19643894251593	2.47612963589276e-16	6.03001446834179e-16
ARG1	2.01239665743108	1.52729638349151	0.217420931209339	7.02460602572334	2.14671111128276e-12	4.54542345214251e-12
ARG2	203.656706192612	0.597741898889027	0.0579461466580646	10.3154727857273	5.9985338562591e-25	1.98545561249999e-24
ARGFX	0.0134018582430529	-0.0832321342527555	3.39376039627614	-0.0245250473027157	0.980433804863004	0.999641322860956
ARGFXP2	0.460959598555923	-0.538187730042707	0.266096556079146	-2.02252797996616	0.0431218360258841	0.0554096166163934
ARGLU1	2306.17138044775	-0.271866629768586	0.062407902107912	-4.35628535146865	1.32288295742708e-05	2.10715217879285e-05
ARHGAP1	2849.08759265759	0.0581904795545486	0.036241765311906	1.6056193470088	0.10835757192318	0.134005374523251
ARHGAP10	169.100676015679	0.10088955564663	0.0661206918674549	1.52583938245644	0.127049870086305	0.156186640292764
ARHGAP11A	217.662855680501	1.20717976991517	0.105554253882859	11.4365809572664	2.74490850456407e-30	1.09239753635763e-29
ARHGAP11B	12.9292338812212	0.51829237533425	0.129981664288446	3.98742682801854	6.67937952052058e-05	0.00010227509673666
ARHGAP12	1503.79702245767	-0.905695799934959	0.0485571678755504	-18.6521545543227	1.21289539063808e-77	2.3828766430742e-76
ARHGAP15	64.8149507404887	1.45214148044714	0.110019991175575	13.1988874470072	8.90403781206669e-40	4.87312925313633e-39
ARHGAP17	841.432743818867	-0.0190579300753622	0.032349157610346	-0.589132190238768	0.555772600976233	0.628326694944215
ARHGAP18	309.972123101617	1.42639794374224	0.0880163401563814	16.2060583433476	4.5695215699096e-59	4.81049527776517e-58
ARHGAP19	481.772449467187	-0.438786748137541	0.0437412347581735	-10.0314211650267	1.10908607862302e-23	3.51822905049514e-23
ARHGAP20	176.106659127992	0.257500639324898	0.0982304366388414	2.62139361419757	0.00875710892918661	0.0118460604820026
ARHGAP21	4872.58300018087	-0.811259833604759	0.046646621166701	-17.3916097953925	9.55134704201102e-68	1.35143720495207e-66
ARHGAP22	365.836099940404	-1.00876709252586	0.0773190591641806	-13.0468102358026	6.62641568742261e-39	3.51970627469931e-38
ARHGAP23	1901.60784467984	-0.546182855264551	0.0643819655259791	-8.48347593619456	2.18564435473906e-17	5.54253908711685e-17
ARHGAP24	416.887932180907	-0.765455861482916	0.0704373494777558	-10.8671871834792	1.65216095758724e-27	5.97315095062042e-27
ARHGAP25	256.690853453262	0.607186607184312	0.0771827548474173	7.86686881525103	3.63627597321506e-15	8.51025957698253e-15
ARHGAP26	884.782347311695	-0.442860789656801	0.0716816428149983	-6.17816183147157	6.48522213290846e-10	1.24921347138902e-09
ARHGAP27	318.985822605873	0.2081778584228	0.0616988443228233	3.37409656060271	0.000740583845590012	0.001070014108683
ARHGAP28	51.870709505168	-0.79837246565894	0.119503824406949	-6.68072732919599	2.37759248005269e-11	4.84239347910043e-11
ARHGAP29	445.958147724944	0.901157170987211	0.0774777741369714	11.6311701133034	2.86147969894125e-31	1.17512144338331e-30
ARHGAP30	386.878992940859	0.37601806563773	0.0864969232498806	4.34718428713879	1.37896352790192e-05	2.19401188005455e-05
ARHGAP31	2450.38759591587	-1.02030401255652	0.0623482942001458	-16.3645858422561	3.42348771753685e-60	3.73082996287702e-59
ARHGAP32	1846.69054167765	-1.30013827916831	0.0605501469410021	-21.4720912310108	2.83949404996868e-102	1.17755837976002e-100
ARHGAP33	1334.84577536632	-0.461949366517814	0.0596466998479303	-7.74475985587731	9.57626609677146e-15	2.2101562793841e-14
ARHGAP36	288.893271244166	-1.71209877751994	0.162668119047654	-10.5251034286465	6.6188714339345e-26	2.26412231984268e-25
ARHGAP39	633.116639252106	-0.478582338148841	0.0518172179047886	-9.23597131417226	2.55953082991109e-20	7.21216483885253e-20
ARHGAP4	499.488481699328	0.0959978071153287	0.0810706280764813	1.18412561235822	0.236363342835186	0.282152869145002
ARHGAP42	266.670878882963	-0.256753790067118	0.0702646734075839	-3.65409497568953	0.000258090725620347	0.000382485978915381
ARHGAP5	2797.7680375507	-0.881497241559027	0.0490919043682359	-17.956061246819	4.3027829324149e-72	7.12565297153389e-71
ARHGAP6	208.631439788915	-0.128666082414915	0.0935553753335077	-1.37529331645823	0.1690405277417	0.204959959717641
ARHGAP8	8.49319076107463	-0.816631700420312	0.11458736587893	-7.12671675586944	1.02791312033484e-12	2.19951660021563e-12
ARHGAP9	159.391805787583	0.731259216926192	0.0881658148003545	8.29413552840269	1.09377694214045e-16	2.69441286492483e-16
ARHGDIA	5567.88136161053	0.241501560814137	0.038303325239967	6.30497637740719	2.88237855456376e-10	5.62652782738725e-10
ARHGDIB	1814.51781379526	1.14189002467861	0.0774368896564922	14.7460729601099	3.26095600954611e-49	2.45600041706811e-48
ARHGDIG	398.444464810681	-1.62241283881877	0.139298304209905	-11.6470394095681	2.37569599295922e-31	9.78056524785681e-31
ARHGEF1	1266.56379119613	0.0153429817365817	0.0582812786994817	0.263257465844142	0.792352140988287	0.864578438421908
ARHGEF10	866.983001138069	0.0432999098396512	0.0534204054895189	0.810550003184583	0.417624138545066	0.482602500779925
ARHGEF10L	2088.51710665701	-0.824038321158484	0.0625469757163339	-13.1747108748424	1.2269657563127e-39	6.67640466302132e-39
ARHGEF11	1549.84192310251	-0.602022170744608	0.0449098897935745	-13.4051135175741	5.64368638012101e-41	3.24368788382542e-40
ARHGEF12	3851.84246820283	-0.617471928455135	0.0424977150011981	-14.5295324333962	7.87561555516754e-48	5.65236521180616e-47
ARHGEF15	100.805743787073	0.433117227919261	0.0768156135111879	5.63840094639326	1.71636502840232e-08	3.1174183578907e-08
ARHGEF16	19.0975444963954	-0.0599923962740328	0.132434375689902	-0.452997161511194	0.650550785454309	0.725587589042974
ARHGEF17	2423.58422371494	-0.944322112407818	0.0574140966163238	-16.4475654597225	8.7307744472015e-61	9.71758236198065e-60
ARHGEF18	1238.91684721484	-0.369473633749817	0.0281490853401412	-13.1255999719089	2.34914844298181e-39	1.26644464468938e-38
ARHGEF19	40.8949547636272	0.978926875631807	0.0907360475096195	10.7887317389269	3.89122299910978e-27	1.39133682379786e-26
ARHGEF2	2819.70852244229	-0.32236678592881	0.0447438327356493	-7.20471998528562	5.81632502508167e-13	1.25828888979803e-12
ARHGEF3	969.380156043281	0.524135716158568	0.0576840982967229	9.08631202766577	1.02455409588551e-19	2.82471986686208e-19
ARHGEF33	16.9244797416545	-0.679900176837365	0.0852369735052342	-7.97658749340289	1.50434541057125e-15	3.57347382549476e-15
ARHGEF35	9.66287560857067	0.325604838971288	0.122083144525616	2.66707447810675	0.00765147136071118	0.0103901299344689
ARHGEF37	615.018509448636	-1.03391179888817	0.0818241266807663	-12.6357816554759	1.34055317239523e-36	6.5662924478356e-36
ARHGEF38	0.0014748355542574	-0.0625384665237017	3.39376039627614	-0.0184274843304563	0.98529782683783	0.999641322860956
ARHGEF4	2775.69424505088	-1.04651550308602	0.0696849448239845	-15.0178134707488	5.61288477306947e-51	4.47743319342278e-50
ARHGEF5	13.695002757735	0.331640465010232	0.139239408579515	2.3818002991649	0.0172282374393089	0.0228148407214524
ARHGEF6	3627.33926653107	-0.277892873244195	0.056412357551072	-4.92609926810113	8.38873919964718e-07	1.41861437599903e-06
ARHGEF7	2854.0096889147	-0.512152601350482	0.0523017812513725	-9.79225925191682	1.21549078225097e-22	3.71372900378561e-22
ARHGEF9	2076.13581321068	-0.97351470573603	0.0578028516127402	-16.8419840643547	1.20139835818004e-63	1.46917456225805e-62
ARID1A	2522.81426908332	-0.331694679034124	0.0452122436690561	-7.33639059061209	2.19431032802152e-13	4.82933425473194e-13
ARID1B	1442.59841834747	-0.564927684661664	0.0409456790520202	-13.7970036824628	2.65667378831644e-43	1.65295808241672e-42
ARID2	639.597091393024	-0.353981045567006	0.04190639599102	-8.44694556035933	2.99023078226087e-17	7.54331188556341e-17
ARID3A	48.0902030170461	0.367266441102666	0.0637751079966558	5.75877411484626	8.47269913700259e-09	1.55917485139995e-08
ARID3B	86.7367568924336	0.157682903142741	0.0487989613668715	3.23127580436145	0.00123238961159413	0.00175639221156304
ARID3C	0.874232740570398	0.425289840047967	0.193013017912121	2.2034256789954	0.0275647599371881	0.0359484365944
ARID4A	679.800909907031	-0.830419923252966	0.0423157815101612	-19.6243551133177	9.57847558573733e-86	2.43643688027677e-84
ARID4B	965.483024927171	-0.574507885176135	0.0314040632954155	-18.2940621336731	9.22754854835329e-75	1.67353792199458e-73
ARID5A	643.702221152957	0.705766041344267	0.0773983388330888	9.11862001155176	7.60869604124693e-20	2.10947107168724e-19
ARID5B	1220.03021144666	-0.290785693069926	0.0613568307023524	-4.73925542993826	2.14504965437577e-06	3.55826939737999e-06
ARIH1	1182.79482195411	-0.176956257511819	0.0299075344060152	-5.91677853177453	3.28308282384406e-09	6.13909544543541e-09
ARIH2	1741.26394221749	0.0553914640795886	0.0276948227495039	2.00006566500162	0.0454931737281425	0.0583055009253875
ARL1	1335.15942957242	0.457085973682212	0.0370854461272244	12.3252116777602	6.62692383502725e-35	3.05146367437271e-34
ARL10	126.042791076858	-0.764828067472845	0.072923362018016	-10.4881076010167	9.79709152844314e-26	3.33117916583754e-25
ARL11	51.1187402943697	1.15774057107992	0.0966779379813525	11.975230287837	4.79105431621471e-33	2.08823812027978e-32
ARL13A	0.269644817497419	-0.0785606412891438	0.233255253417098	-0.336801165839831	0.736266794159772	0.811104627132886
ARL13B	268.092503725187	0.326627039281677	0.0441771127969734	7.39358049003272	1.42926863204927e-13	3.16411120720118e-13
ARL14	0.0285793401869831	0.0402843744250916	1.65590606901395	0.024327692964541	0.980591223873346	0.999641322860956
ARL15	194.451204056339	-0.0384383827373184	0.0573017499295618	-0.670806437579458	0.502343845891405	0.572395358803548
ARL16	660.100558971611	0.402249070903161	0.043504336347463	9.24618336182523	2.32651877531035e-20	6.56585730110722e-20
ARL17A	70.9704345223912	0.252835541546231	0.055319886388981	4.57042770783044	4.86729807087262e-06	7.9313152206254e-06
ARL17B	2.08835340099048	-0.420768684081195	0.0950862021930163	-4.4251287187501	9.63847949083105e-06	1.5474494123815e-05
ARL2	1559.68521968051	-0.204724332092686	0.0515092787099647	-3.97451366472117	7.05232133839069e-05	0.000107810724061787
ARL2BP	2099.34806666266	0.541356302544079	0.0341735821701927	15.841368336746	1.61272897910161e-56	1.55491860665035e-55
ARL3	1517.51193972173	-0.740725042554794	0.0498282495105987	-14.8655642096606	5.51483173642698e-50	4.2636704177532e-49
ARL4A	831.380558485877	0.686934034340398	0.0838565646388558	8.19177410020085	2.57403421256655e-16	6.26458934262819e-16
ARL4C	1458.17538901776	1.39904925133744	0.100578425040864	13.9100333970135	5.5053737578204e-44	3.48779239377673e-43
ARL4D	201.128088170546	0.467428203051076	0.080472345861569	5.80855694023335	6.30135994432241e-09	1.1657662918927e-08
ARL5A	975.478897838064	0.273440835053664	0.0325244585332691	8.40723711891968	4.19781863506863e-17	1.05054107818414e-16
ARL5B	159.981584417779	-0.535290419221664	0.0793069453778667	-6.74960328721795	1.48249942682024e-11	3.04597700433847e-11
ARL5C	0.782432401248106	-1.80044330494889	0.206393217102511	-8.72336470270073	2.70054717071697e-18	7.08295138464177e-18
ARL6	88.5645204619748	0.258798879962631	0.0543897868861012	4.75822566660514	1.95302088870243e-06	3.24706307781165e-06
ARL6IP1	8476.39749015843	0.28135651501431	0.0366002623825575	7.68728136627773	1.50294370984907e-14	3.44545543660669e-14
ARL6IP4	1893.20857007329	0.0675738996205853	0.0486655293108391	1.38853723729118	0.164973513935999	0.20029827688818
ARL6IP5	3375.17080609235	0.458470062309269	0.0411999770635525	11.1279203287434	9.17511539100431e-29	3.45513511390347e-28
ARL6IP6	548.590293192075	0.164913640673107	0.0391978054916807	4.20721615928495	2.5853582089943e-05	4.05262974670995e-05
ARL8A	2764.20780323739	-0.366988237664592	0.0355450263147321	-10.3246016591775	5.45447335938851e-25	1.8090015961713e-24
ARL8B	2663.93970217417	0.0558959952466388	0.0349451611783581	1.59953462401701	0.109701861626128	0.135574813155533
ARL9	9.37522767499461	2.46121021337423	0.220480919664063	11.1629170321145	6.19257306928148e-29	2.34758798914452e-28
ARMC1	769.605180985445	0.117685877540893	0.0386619044238924	3.04397518163033	0.00233474400486936	0.00326847672376591
ARMC10	609.711178205008	0.550573141149823	0.0347220994541564	15.8565625294848	1.26638239185872e-56	1.22575674579177e-55
ARMC2	44.3566310662237	0.459117238713904	0.0803468669041357	5.7141896928189	1.102279874446e-08	2.01814851308239e-08
ARMC3	36.855154505263	0.134624336252127	0.249120883372035	0.540397635195761	0.588922838330558	0.662517304592625
ARMC4	23.3609119420052	-0.367335967314441	0.157900740308725	-2.32637267308711	0.0199986781427151	0.0263411160679762
ARMC5	621.009683300047	-0.62327350806396	0.0481165582695408	-12.9534100209846	2.24744499076267e-38	1.17085682133741e-37
ARMC6	926.57908160602	0.0681251030068994	0.0398070349276898	1.71138350622321	0.0870103399454731	0.108690274670056
ARMC7	304.918495756662	0.306975180103774	0.0320695034761205	9.57218375184241	1.04671049175431e-21	3.09085983584772e-21
ARMC8	843.519400447234	-0.114747959277637	0.0277361176641483	-4.13713125488937	3.51674962871611e-05	5.4697942636359e-05
ARMC9	213.776232874085	0.46767412836802	0.0517022547807245	9.04552674446178	1.48945306760948e-19	4.0826089821934e-19
ARMCX1	837.964842111955	-0.266844165012843	0.0329883634978437	-8.08903918590216	6.0137223388193e-16	1.44654796653822e-15
ARMCX2	894.782209983501	0.256738473418638	0.0590558511901719	4.34738418369227	1.37770777068393e-05	2.19218984895389e-05
ARMCX3	2473.49079635632	-0.34250338683488	0.0326847842347129	-10.4789857070901	1.07894663083371e-25	3.66357640682026e-25
ARMCX5	207.873759455678	0.0428039533018786	0.0411164299700121	1.04104255483993	0.297855798509498	0.351034214854565
ARMCX6	273.494912826039	-0.0807837460397387	0.0382191401220818	-2.11369868033908	0.0345410113000826	0.0447082250735577
ARMS2	0.546818956142184	1.04298393960993	0.236860465709538	4.40336860980818	1.0658284448907e-05	1.7060656704674e-05
ARNT	771.660255495557	-0.0222678408306267	0.0326699555713881	-0.681599972854834	0.495491932128704	0.565335361493455
ARNT2	7361.90804887585	-0.935347308265747	0.0499770460360513	-18.7155380810428	3.6986731346417e-78	7.38356470775452e-77
ARNTL	441.623435842767	0.869180064541851	0.0619605101369605	14.0279681787734	1.05120312702876e-44	6.80313404736896e-44
ARNTL2	56.8761626932277	1.50290291762885	0.105808692253957	14.2039645856472	8.65727692860066e-46	5.80166330478874e-45
ARPC1A	2305.37709138469	0.598079236529679	0.0315997873124187	18.9266855063494	6.87546127038306e-80	1.45300926186358e-78
ARPC1B	1309.61483430637	1.03729735590977	0.0830262395512775	12.4936087857999	8.0899090593196e-36	3.85218033348288e-35
ARPC2	3231.6056008325	0.6583518531216	0.0297081008957332	22.1606845699166	8.22902655615721e-109	4.25911209980951e-107
ARPC3	2438.34327252785	0.292227805815994	0.0386829597457929	7.55443243579043	4.20690274625103e-14	9.47868073868312e-14
ARPC4	3134.45731615453	0.597475135105589	0.0361992784812502	16.5051669583707	3.36800295703484e-61	3.79125057452025e-60
ARPC5	2602.61386655647	1.08433263172475	0.0474817425108558	22.8368331570148	1.97533289113338e-115	1.32287242908571e-113
ARPC5L	697.03107907556	0.191834445049385	0.0402859439725667	4.76182077749046	1.9185403466462e-06	3.19053903452749e-06
ARPM1	14.8219255605512	-0.0566314887320912	0.118550952073499	-0.47769746038801	0.63286555214136	0.707374899357101
ARPP19	6074.99117867834	-0.348006273650105	0.0379173003496409	-9.17803404886659	4.39033215935042e-20	1.22749724111147e-19
ARPP21	734.992832606204	-2.27839681712591	0.102740812087227	-22.1761612628831	5.83502484744679e-109	3.04388677765626e-107
ARR3	0.0223574779802597	0.0850445627048585	1.82938436864088	0.0464880777176649	0.962921236416769	0.999641322860956
ARRB1	469.562340833737	-1.15969974024811	0.0821436941254455	-14.1179399416476	2.94474339729393e-45	1.94190446987883e-44
ARRB2	1559.53214455079	0.194592382205556	0.0437425641924352	4.44858196582835	8.64390628914891e-06	1.39194276498618e-05
ARRDC1	411.512482078622	-0.162965141799648	0.0362881118910057	-4.49086858773823	7.09333077646992e-06	1.14765830870032e-05
ARRDC2	924.565925507109	-0.944814662420044	0.0886605679805481	-10.6565374431995	1.62536519065304e-26	5.68648326408668e-26
ARRDC3	1325.73439106169	0.955844379101467	0.0539330038394583	17.7228099874933	2.795908090243e-70	4.33672034999115e-69
ARRDC4	1169.63595935229	0.354931328195525	0.0798047821324377	4.44749448230445	8.68776899539575e-06	1.39855160626709e-05
ARRDC5	2.95309942304854	0.0970934668262634	0.118831478146253	0.817068577626918	0.413889238796751	0.478509645437302
ARSA	509.47182350118	0.305181159792643	0.0623911130742729	4.89142034426191	1.00110908104951e-06	1.68663822145541e-06
ARSB	502.987195340951	0.086103510345449	0.0379304982533741	2.27003372774808	0.0232055367275065	0.0304154558681143
ARSD	464.210336096679	1.38028718303814	0.0925240685610989	14.9181418900387	2.5117068974114e-50	1.96099117083049e-49
ARSE	64.6690251957725	1.03566428214695	0.0991354130188404	10.4469659288162	1.51287856476189e-25	5.11422097361443e-25
ARSF	74.2301304703603	1.00978814714164	0.192878756659334	5.23535180665413	1.64670903048115e-07	2.87347826683343e-07
ARSG	124.496182793045	-0.243502165757698	0.0714995396466876	-3.40564662319444	0.000660075579745749	0.000956023104428624
ARSH	0.00888391222167669	-0.0898102703835893	3.39376039627614	-0.0264633503538244	0.978887765535314	0.999641322860956
ARSI	91.7562598570152	1.91496086995648	0.139936094367058	13.6845384932172	1.25602069738846e-42	7.65624178484977e-42
ARSJ	139.598685314387	2.02402056174199	0.134105664752684	15.0927297923967	1.80804492427591e-51	1.46588443901519e-50
ARSK	166.349914984942	0.66251572197929	0.0462887544091157	14.3126711970634	1.82371551607871e-46	1.25005230550582e-45
ART1	0.521399625880496	-1.72795111355902	0.260717164366468	-6.62768451688969	3.40993265156697e-11	6.90944443953921e-11
ART3	46.3551338016296	0.674388643213176	0.14555783348419	4.63313191101067	3.60174876307745e-06	5.90891878924806e-06
ART4	0.201811954031641	-0.43617190305453	0.558936874746832	-0.780359863092039	0.435179085865294	0.501310728678971
ART5	2.08577002309898	-0.127264678692717	0.167268061339817	-0.760842671776828	0.446751043511209	0.51377536320257
ARTN	11.9712030925151	0.739396111800893	0.11064471067003	6.68261598158048	2.3471406329515e-11	4.78233824308742e-11
ARV1	414.235526634059	0.250577102354927	0.0370831044032116	6.75717705913601	1.40706203348623e-11	2.89398118798481e-11
ARVCF	1007.60392650072	-0.858697937752804	0.0566810812364265	-15.1496393332906	7.61835285331071e-52	6.30294693702747e-51
ARX	97.3936911848747	0.582865886686615	0.146893088015993	3.96795992622305	7.24905195282538e-05	0.000110724269425842
AS3MT	263.219255210856	-0.388486902207926	0.0727034275356092	-5.34344686868648	9.11955686376332e-08	1.60919508376696e-07
ASAH1	4563.89408206971	0.0694400285085361	0.0458921445603478	1.51311360961184	0.130250803191456	0.159923299576601
ASAH2	4.06684679990113	-0.0221122547203243	0.129429759133148	-0.170843667394735	0.86434669218325	0.93220590202114
ASAH2B	7.35741827697766	-1.86567723482728	0.161675982823311	-11.5396065775966	8.3305358663608e-31	3.3694391446413e-30
ASAM	20.2910181876531	1.87755530662678	0.155587457857926	12.0675235168458	1.56781682679744e-33	6.93569135407402e-33
ASAP1	1767.11723469738	-0.134781009002102	0.0446739981705879	-3.01699007300489	0.00255298172286381	0.00356593550537833
ASAP1IT1	0.0409177576313138	0.289435296025388	1.79268760331639	0.161453281369239	0.871736404603806	0.939000747077175
ASAP2	875.77470545651	-0.042790721200506	0.0468508841949156	-0.913338604720502	0.36106448467462	0.421195861808097
ASAP3	1209.67844466147	0.0532796265740659	0.0708873296687204	0.751610010181776	0.452285621714097	0.519748282854408
ASB1	1055.79446726886	-0.895881261178492	0.046337817740873	-19.3336955613312	2.79651011994625e-83	6.5448902134232e-82
ASB10	0.0362824373020896	-0.0383220720272591	2.10011428188878	-0.0182476126931499	0.98544131951211	0.999641322860956
ASB11	0.0981695709818421	0.157568233254739	1.19515713786556	0.131838925830407	0.895111696904842	0.959746817813971
ASB12	1.6324275550444	-1.05842631963114	0.215723594940831	-4.90640034031254	9.27630887110059e-07	1.56563874629057e-06
ASB13	826.255222851717	-1.10703809272611	0.0515627500487862	-21.4697255611597	2.98777413252693e-102	1.23646443902049e-100
ASB14	12.5678048935565	-0.704924165843853	0.0686136614622415	-10.2738164794161	9.24724225385253e-25	3.03892710872213e-24
ASB15	0.00862561312514321	0.0248958218502473	3.39376039627614	0.00733576297182461	0.994146960478463	0.999641322860956
ASB16	14.7961599540405	0.297432863288134	0.0755126599583787	3.93884765087171	8.1873895660008e-05	0.000124767031541541
ASB17	0.0241216440001059	0.234738113947724	3.39376039627614	0.0691675564972985	0.944856247402563	0.999641322860956
ASB18	0.00913037668635827	-0.0439278334900556	3.39376039627614	-0.0129437050235651	0.989672705974529	0.999641322860956
ASB2	24.5295988740018	-0.422141599161536	0.161122323525714	-2.62000689863541	0.00879279882169488	0.0118935278773427
ASB3	839.748138148461	-0.349024075272408	0.0419788597601644	-8.31428193301269	9.23094686220949e-17	2.28189374796831e-16
ASB4	5.24588726913916	-1.47545030769099	0.160772151563432	-9.17727537600849	4.42136527501128e-20	1.2358252093422e-19
ASB5	20.4120470034887	1.44298515445987	0.193271671191299	7.46609756911355	8.26081034356623e-14	1.84262454642189e-13
ASB6	968.811690625678	0.0794617689171807	0.0288471367270883	2.75458079839736	0.00587673775511019	0.00803854350811132
ASB7	355.945389382059	-0.0293477094683961	0.0258728832534574	-1.13430378751755	0.256667140981591	0.304756677788444
ASB8	844.086280346449	-0.165943600082772	0.0236433875608616	-7.01860508167909	2.24094188008747e-12	4.74292023157953e-12
ASB9	13.1594490659683	1.6842499486908	0.0982402007091306	17.1442030506179	6.94444308053787e-66	9.20185128245335e-65
ASCC1	873.66222174026	-0.545516180842407	0.0424329239036714	-12.8559649125477	7.96260156047698e-38	4.07546219295986e-37
ASCC2	1029.42561829803	-0.0554742578149719	0.0364910510344719	-1.52021540192326	0.128456847690914	0.157826157505829
ASCC3	959.247423887336	-0.174556578073274	0.0492932895386703	-3.54118338838666	0.000398336609444605	0.000585165748408211
ASCL1	1444.78539150961	-0.695403677873461	0.0926812837157349	-7.50317270104232	6.22913948000774e-14	1.39494161672157e-13
ASCL2	11.9183039702115	1.07280611812425	0.110450992003369	9.71296046025124	2.65511125277052e-22	8.01221957126959e-22
ASCL3	0.0201711288414816	-0.133460143805139	2.03681572099782	-0.0655239167830844	0.947756864411658	0.999641322860956
ASCL4	0.466073874139255	-1.0385214803779	0.267802973143885	-3.87793110803114	0.00010534853784043	0.000159743292710996
ASF1A	785.361050560256	-0.3893764499333	0.0420531430922218	-9.25915214183643	2.06061937290078e-20	5.82456264494685e-20
ASF1B	200.865587720151	2.08076141291853	0.126922078292795	16.3940067867345	2.11062135260176e-60	2.31409552392835e-59
ASFMR1	0.383774504299417	-0.486518438179342	0.244311367729622	-1.99138682207276	0.0464383768848787	0.0594592394386352
ASGR1	113.490151140815	-0.91301445468533	0.0761974873116755	-11.9822121030155	4.40412798972622e-33	1.92085872696024e-32
ASGR2	8.10864798087346	0.819289443817933	0.141333229851894	5.79686351664418	6.75666343823236e-09	1.24860016161164e-08
ASH1L	2388.75692089934	-0.997583155531552	0.0474087792574421	-21.0421607802726	2.69799429761685e-98	1.00342103117559e-96
ASH2L	1049.24695266815	-0.00269749897180359	0.023910422872883	-0.112816865939366	0.910175746625095	0.972427176099454
ASIP	8.31078325838943	0.818417830848477	0.149842611079003	5.46184976993612	4.71198760484578e-08	8.40055133472955e-08
ASL	382.219152356303	1.00370317067285	0.0537049761356605	18.6892024332617	6.06123385068566e-78	1.19912014592956e-76
ASMT	0.511580118428554	-0.744793990576196	0.26034856201864	-2.86075707429055	0.00422630753434021	0.00583128657710211
ASMTL	1032.58392635726	-0.621512759719244	0.0463749357558372	-13.401910958788	5.89261190578868e-41	3.3838136097465e-40
ASNA1	2127.0945729588	0.651391753499055	0.0358303164664613	18.1799051121635	7.44625060345245e-74	1.30973403471374e-72
ASNS	1006.15590988836	0.452077891703973	0.0555157859686065	8.14323140375995	3.84865709914035e-16	9.31411667394202e-16
ASNSD1	1126.56657461873	0.158540804451128	0.0273845440177182	5.78942648628911	7.06271593336619e-09	1.3032134222016e-08
ASPA	137.416048980784	-1.12133816778165	0.114298453992533	-9.81061535491025	1.01348617217377e-22	3.10611261456411e-22
ASPDH	66.367059384794	-1.59153403029304	0.128835681545008	-12.3532084528698	4.68067613251018e-35	2.16433503556681e-34
ASPG	1.01462864244508	-2.51388262775698	0.353258576795607	-7.11626777914439	1.10888758981553e-12	2.36920442907019e-12
ASPH	2845.74986584904	-0.0637968966817644	0.0462874040097575	-1.37827769879503	0.168117565897495	0.203915713686963
ASPHD1	549.296790004552	-1.42625221135665	0.101699894705137	-14.0241267259111	1.10969689163157e-44	7.17232523078338e-44
ASPHD2	232.337184171478	0.144363744172518	0.0756595036690794	1.90807152005567	0.0563819730937546	0.0716035526066691
ASPM	180.425250823146	1.21430675173555	0.158363785459563	7.66783105248272	1.74929085142574e-14	3.99863843955402e-14
ASPN	51.5014192903438	2.59489229194018	0.145330581889788	17.8551015085595	2.63800658712261e-71	4.25148004687248e-70
ASPRV1	131.378215851464	-0.340371664276601	0.0538455061478691	-6.32126408732943	2.59432214444949e-10	5.07572521411589e-10
ASPSCR1	544.593271456347	-0.351491583505767	0.0473755330600295	-7.41926392807849	1.17773015836268e-13	2.61464272922203e-13
ASRGL1	1145.2403756845	-0.837230798557193	0.0586085057246458	-14.2851415200836	2.70858700128837e-46	1.8425641773006e-45
ASS1	385.667525198553	0.967677358130364	0.121439772665456	7.9683726088333	1.60777484252988e-15	3.81367963425508e-15
ASTE1	175.644766751227	0.469723352903834	0.0312142559914686	15.0483597312785	3.53900596947427e-51	2.84138174697806e-50
ASTL	0.201764149312757	-0.17402930104216	0.456625189134686	-0.381120676614336	0.703113705487258	0.778431889632723
ASTN1	4264.68184422026	-0.785168890049296	0.0622524707357724	-12.6126542572408	1.79832800408082e-36	8.77819650945435e-36
ASTN2	1850.38427389463	-0.893091679153456	0.0681692234740219	-13.1010980269388	3.24528379349117e-39	1.74150678501287e-38
ASXL1	1664.30446592803	-0.184552491253807	0.0320774195982216	-5.7533459226265	8.74941926235592e-09	1.6084553281803e-08
ASXL2	391.705471509723	-0.571078565744309	0.0806190341417787	-7.08366915857607	1.40386839467357e-12	2.99010241620438e-12
ASXL3	137.335094206319	-1.78409860266633	0.0958924246347982	-18.6052090085425	2.91552460193571e-77	5.68842954568618e-76
ASZ1	0	0	0	0	1	NA
ATAD1	1046.94719501925	-0.811714974681092	0.0463450986946767	-17.5145807764636	1.10899881485904e-68	1.62121559785772e-67
ATAD2	578.933983328632	0.370236886249368	0.0664653846312902	5.57037152952952	2.54196694353933e-08	4.58585827464326e-08
ATAD2B	267.79872575198	-0.565038160729729	0.0454524394389681	-12.4314155126578	1.7648134141418e-35	8.29002282192723e-35
ATAD3A	650.406668360629	-0.388359403754524	0.0512910629958687	-7.57167781423841	3.68434314965571e-14	8.32779181934151e-14
ATAD3B	271.309224727555	-0.413705949215241	0.070955746032271	-5.83047846508562	5.52686715218581e-09	1.02449118718701e-08
ATAD3C	41.4155765960262	0.872569562949627	0.124197366224474	7.02566881629799	2.13043249742089e-12	4.5119191662793e-12
ATAD5	69.2537451576604	0.311925313716726	0.0833619831469468	3.74181733616963	0.000182694292371181	0.000272891941652771
ATCAY	4288.49120016246	-1.6573761433102	0.128992970244126	-12.8485772532683	8.76066688846581e-38	4.47930615759757e-37
ATE1	203.802018871685	-0.943521517537581	0.0701336885430459	-13.4531854396689	2.94889759947342e-41	1.71576158245851e-40
ATF1	227.945681616264	0.361381023091991	0.0349079571507871	10.352396776786	4.08138285451199e-25	1.35815431131427e-24
ATF2	521.108369566766	-0.226313526232179	0.0558671410914346	-4.05092370597207	5.10158409061429e-05	7.86198409610877e-05
ATF3	559.826665462056	1.3206148368742	0.115798258224531	11.4044447396916	3.97304240951196e-30	1.57012798412591e-29
ATF4	4912.93137185352	0.169385883971685	0.0400774874371305	4.22645966111024	2.37396805726477e-05	3.72834485811753e-05
ATF5	578.358455742624	1.17708148818574	0.0666536483383593	17.6596708136729	8.57382330122225e-70	1.30637124750291e-68
ATF6	1051.77719115392	-0.0473667834228486	0.0393057477704836	-1.20508541650029	0.228170329063355	0.272865614926574
ATF6B	1775.67931361994	-0.174156713107274	0.0271674176985808	-6.41049933562037	1.45043786320449e-10	2.87233064558467e-10
ATF7	1144.49419856436	-0.0987376894712601	0.0381002408793813	-2.59152402169442	0.00955518704958871	0.0128852022370066
ATF7IP	1038.1355987292	-0.693572023430368	0.0688714084682375	-10.0705363641609	7.45702979461491e-24	2.3818998004939e-23
ATF7IP2	30.4822945014519	0.0818091177539886	0.0943959649102011	0.866659055096409	0.386128845993223	0.448770644589802
ATG10	77.4744969324548	0.757318137968923	0.0421839918944178	17.9527376134628	4.56820263919109e-72	7.54629007639042e-71
ATG12	632.644184917975	0.199611811493785	0.0281783104076426	7.08388148920547	1.4017179324872e-12	2.9861638447817e-12
ATG16L1	479.224956774461	0.242590550840915	0.0331634007453222	7.31500827384636	2.57365533504586e-13	5.64478531827994e-13
ATG16L2	417.203481345375	-0.457978777290432	0.0636783915515756	-7.19205944326495	6.38212307485475e-13	1.37768513244959e-12
ATG2A	1001.12667712586	-0.584699445343814	0.0337848492656907	-17.3065577633815	4.19772322055176e-67	5.77857412506927e-66
ATG2B	831.964953879783	-0.780676777772237	0.0433000154892926	-18.0294803350656	1.14361411686844e-72	1.92443655676426e-71
ATG3	948.37893798934	0.328002472793969	0.0282270326078483	11.6201542454297	3.25547972274181e-31	1.33333418479155e-30
ATG4A	201.915607850913	0.691552603083595	0.0373652810669793	18.5078924428255	1.78343053117783e-76	3.39605604414391e-75
ATG4B	1410.44569800463	-0.0218704225668547	0.0361787778474153	-0.604509711718115	0.545504814382184	0.617563788435068
ATG4C	279.036599060398	0.314063914460863	0.0508683373783719	6.17405503397475	6.6560354966802e-10	1.28099603544361e-09
ATG4D	370.886041589664	0.147738842794033	0.0425365247510382	3.47322315724504	0.000514247584034491	0.0007501052140041
ATG5	596.012058340109	0.473908795795665	0.0309551525765606	15.3095286680807	6.60407687619038e-53	5.68197117694105e-52
ATG7	810.791975103679	0.261553264130834	0.0318466354429951	8.21290100170895	2.15907552664813e-16	5.26696457848214e-16
ATG9A	2228.75485238526	-0.300773956215107	0.0301692464340259	-9.96955482043079	2.07155257457661e-23	6.50473414950611e-23
ATG9B	38.5362008499424	1.40849391715014	0.127570680452616	11.0408905255726	2.42616589887406e-28	9.00634580774915e-28
ATHL1	314.735723061978	0.0410109287837845	0.0958597204641729	0.427822328139504	0.66878047958888	0.743702201665565
ATIC	1345.4178943645	-0.122533032794358	0.0390968664117145	-3.13408833086542	0.0017238895426694	0.00243568513216931
ATL1	799.739583726467	-0.946565434595226	0.0693087668504133	-13.6572251622679	1.828183694562e-42	1.11029673337324e-41
ATL2	475.72966151225	0.205788588923722	0.0375679763875178	5.47776613786674	4.30728879838394e-08	7.69566343851869e-08
ATL3	211.972958159439	0.609107988499174	0.0728704916948863	8.35877423538668	6.33732551024654e-17	1.57721034010819e-16
ATM	1363.55921544999	-0.840311152386411	0.0440646607303893	-19.0699562519697	4.48680193221403e-81	9.948755559539e-80
ATMIN	1718.48515977121	-0.426014035474685	0.0292568100065888	-14.5611922618612	4.95853903957831e-48	3.58211076463414e-47
ATN1	8430.88424662056	-0.665325728085611	0.0411190203615662	-16.1804858733329	6.92458316777298e-59	7.22833133937671e-58
ATOH1	0.0712390441822486	0.169435577760434	1.12988953121707	0.149957649026029	0.880798028533387	0.947173358075351
ATOH7	11.481834022557	-1.27831315616651	0.135240248546078	-9.45216509071241	3.31893423190452e-21	9.62845503864237e-21
ATOH8	1495.24694076513	-2.34670675095265	0.104558929992944	-22.4438673111041	1.46898425714981e-111	8.56461027337669e-110
ATOX1	810.867418456894	0.238579501598197	0.0531522810039762	4.48860325637481	7.16916730037445e-06	1.1596442545518e-05
ATP10A	448.155046883478	-1.15652696961677	0.0785038622612738	-14.7321028074728	4.01030385509628e-49	3.00439354949258e-48
ATP10B	254.727424882892	-0.448610360528	0.123299580133067	-3.6383770329457	0.000274361571265058	0.000406264990452473
ATP10D	439.938237801229	0.388225455231857	0.055819335477283	6.9550354176082	3.52473473543297e-12	7.40470714926745e-12
ATP11A	1198.39383350603	-0.280685805815943	0.055366583225782	-5.06958872053421	3.98676263550295e-07	6.84475971969296e-07
ATP11B	511.450909293844	0.0202267552333199	0.0425175866247758	0.475726795404079	0.634269028591024	0.708663902252275
ATP11C	256.174528620261	0.114282228655756	0.0598401398421299	1.90979213880941	0.0561599818686665	0.071344483503113
ATP12A	0.93468001872411	-0.352315344961086	0.276142968937696	-1.27584398153036	0.202010676697078	0.243003680087759
ATP13A1	1662.60172076864	0.0124076793134531	0.0404927422174035	0.306417363557077	0.759286889570502	0.833315469602262
ATP13A2	1901.81457310897	-0.296533948790356	0.0506977773851136	-5.84905224814505	4.9438179209099e-09	9.18303060777708e-09
ATP13A3	1146.66423315554	0.279006327207506	0.0481610144858393	5.79319871448184	6.90583159765258e-09	1.27497717947534e-08
ATP13A4	673.020018148512	-0.48300410774846	0.0910466884587753	-5.30501565652393	1.12663325942315e-07	1.98007368574742e-07
ATP13A5	41.9100383324331	-0.0681658930817523	0.137199981276164	-0.49683602321012	0.619304689923763	0.693507901274361
ATP1A1	8768.83300377749	0.387247618099168	0.0627033286442833	6.17587018858327	6.58000354284558e-10	1.26673215722859e-09
ATP1A2	21571.3186118273	-1.20354225716719	0.113424657299193	-10.61094021199	2.65068172938409e-26	9.18609509118547e-26
ATP1A3	5725.87065539769	-1.67802760171695	0.116073612610028	-14.4565811641843	2.27836905461407e-47	1.60497902521729e-46
ATP1A4	5.08164969425617	-1.84065476751022	0.18789546302429	-9.79616398333297	1.1694264293809e-22	3.57463995522246e-22
ATP1B1	3761.61303466817	-0.674908600435632	0.100094081476467	-6.74274233281524	1.55424705066703e-11	3.19107605234309e-11
ATP1B2	14781.4275578596	-0.2721841007732	0.0684853456937391	-3.97434075883015	7.05744613318924e-05	0.00010787770335112
ATP1B3	1803.89215954783	0.661117274973491	0.0373986251788138	17.6775823125181	6.24158915323885e-70	9.5763948749732e-69
ATP1B4	1.14712079077097	-0.777557348611398	0.3308296202753	-2.35032566903881	0.0187569917669173	0.0247549832087617
ATP2A1	16.13958200774	0.130205798060669	0.103124011166425	1.26261378497524	0.206728011401247	0.248301585676619
ATP2A2	8193.10495329854	-0.335591663781371	0.044097530932712	-7.6102143744385	2.73641660957504e-14	6.209958380264e-14
ATP2A3	80.4427692691801	0.514041376119672	0.106732423933027	4.81616885645007	1.46340700382563e-06	2.44555024758351e-06
ATP2B1	1729.50497201826	-0.123933384908952	0.0899251450999765	-1.37818387472343	0.168146524579248	0.203938360054725
ATP2B2	1991.71554542791	-1.64594968149173	0.104726900619149	-15.7165892598828	1.1642472762918e-55	1.09016881237281e-54
ATP2B3	286.755948400895	-2.69919081824651	0.176477473356255	-15.2948178989262	8.27920720889517e-53	7.08630071251852e-52
ATP2B4	5614.1328386152	-0.212324646225121	0.0754940748191379	-2.81246769013051	0.0049162962360261	0.00675228575394896
ATP2C1	2535.8656711033	-0.154735452547177	0.0304020677302434	-5.08963580767401	3.58751851326522e-07	6.17106729334054e-07
ATP2C2	36.6588654018316	-1.33391000549911	0.128611843016004	-10.3715954473424	3.33902726324952e-25	1.11467728931282e-24
ATP4A	0.64811229065478	-1.81731430546316	0.479430743190658	-3.79056689892008	0.000150303841877899	0.00022580318738504
ATP4B	0.25468389047271	0.917911539077612	0.400625770595046	2.29119444242003	0.0219521702591777	0.0288260380927185
ATP5A1	9994.29483031573	-0.0193413698417725	0.0347261293238063	-0.556968778795429	0.57754876080734	0.650977943110474
ATP5B	11286.6409382915	0.143219772654794	0.0383808756499208	3.73153999823059	0.000190312784863931	0.000283908062489291
ATP5C1	2438.40428983214	0.056373243326935	0.0421782622892669	1.33654731767554	0.181370445312547	0.219079052917593
ATP5D	1527.30498481302	-0.004146112384965	0.0611797746439375	-0.0677693307812118	0.945969258106674	0.999641322860956
ATP5E	3286.63368206114	0.0746077413491559	0.0496779806462793	1.501827175311	0.133141748107366	0.163341309118228
ATP5EP2	74.4610088448714	2.73333802278091	0.0651593897366045	41.9484902149937	0	0
ATP5F1	2840.03253919205	0.632989308167326	0.0394038303150756	16.0641567864317	4.55009740209743e-58	4.61836051212377e-57
ATP5G1	1003.01601169931	0.234229135935359	0.0477637086447517	4.90391434378487	9.39454687293001e-07	1.5849200226561e-06
ATP5G2	4326.17231323667	-0.102414802775926	0.0451789616024822	-2.26686933792431	0.0233982088170429	0.0306598818998044
ATP5G3	2442.26151338709	0.776536136179705	0.0509236599205986	15.2490244689894	1.67111177262508e-52	1.4156601995191e-51
ATP5H	1734.22300368202	0.257339532465915	0.0417807173365095	6.15928947301826	7.30720506806749e-10	1.40332034551736e-09
ATP5I	1495.15875132791	0.174236146585557	0.0546224553050625	3.18982633813256	0.00142358310794337	0.00202277169728058
ATP5J	1710.97050850201	0.343504113422682	0.0385101551851645	8.91983197084108	4.66996198962406e-19	1.25675612978981e-18
ATP5J2	1959.97612416241	1.15475054270295	0.0528218719937029	21.8612195879883	6.07979937871517e-106	2.84916934005368e-104
ATP5L	2276.64658898174	0.279057391816788	0.0440020369057039	6.34191986191017	2.26919353429488e-10	4.45412649077408e-10
ATP5L2	0.234436490550045	-0.275415612618843	0.343036145126988	-0.802876363121698	0.422046199195178	0.487343263624746
ATP5O	2958.89831930521	0.361949763950178	0.0434899790798487	8.32260147298828	8.60533967748783e-17	2.12963356338129e-16
ATP5S	187.885479195843	-0.266827475385342	0.0404662400437628	-6.59382920421509	4.2862478753581e-11	8.65589768064625e-11
ATP5SL	710.612517341667	0.632069932600594	0.0379660246857813	16.6483043150238	3.11298413356146e-62	3.63633968648136e-61
ATP6AP1	4210.05407609337	0.257806529546934	0.0314978906500174	8.18488235963164	2.72569781364598e-16	6.62719339628411e-16
ATP6AP1L	69.4522629778918	-0.649859172356781	0.0544735244292042	-11.9298169003432	8.27553147931722e-33	3.58256956790795e-32
ATP6AP2	3795.66025136933	0.404435507304851	0.0325487373132907	12.4255360019667	1.8994900556799e-35	8.91209263283849e-35
ATP6V0A1	4078.63005580445	-0.85305115602019	0.0465638825108413	-18.3200177910761	5.72941081207193e-75	1.04676599564702e-73
ATP6V0A2	580.74213247443	0.184880321509287	0.035404452273869	5.22195118509833	1.7704764583874e-07	3.08266621296561e-07
ATP6V0A4	11.4370854530482	-0.154932010400895	0.279543086642902	-0.554233024545553	0.579419379869898	0.65282655264073
ATP6V0B	2408.24074948837	0.957565724519742	0.051052943507469	18.756327426638	1.71872523159884e-78	3.48011136526903e-77
ATP6V0C	4196.390206836	0.183450877706779	0.0454317549175465	4.0379439015667	5.39217432949502e-05	8.29819670317365e-05
ATP6V0D1	2694.46681823183	-0.157977855628927	0.0365171537022992	-4.32612730216648	1.51753741294605e-05	2.40888405964362e-05
ATP6V0D2	4.20245747302173	2.08900049864402	0.28524130146474	7.32362560371453	2.41359472343886e-13	5.30311330112264e-13
ATP6V0E1	2637.40190605383	0.833773804743288	0.0462446698483582	18.0296195751279	1.14073799145879e-72	1.92286132692922e-71
ATP6V0E2	7156.82957317975	-0.229090196018719	0.0510669362575825	-4.48607676135463	7.25466137680454e-06	1.17299471837191e-05
ATP6V1A	2610.13823548584	-0.496168312981863	0.0539846988542248	-9.19090637741017	3.89545018236282e-20	1.09082510192087e-19
ATP6V1B1	60.5276744415344	0.0444001790212042	0.110310116928986	0.402503235943332	0.687313707351598	0.762387086387484
ATP6V1B2	4127.74074553808	-0.0932182835265828	0.0551414659866036	-1.69052965601658	0.0909266695904406	0.113353837575706
ATP6V1C1	1989.19884732956	-0.611730785105181	0.0478426595104	-12.7863039255208	1.95555235167083e-37	9.87641127826011e-37
ATP6V1C2	45.37733460052	1.67550250661922	0.0448193163900708	37.3834909046139	7.24714453169591e-306	1.02614390037006e-302
ATP6V1D	1511.53132788943	-0.0612836746961146	0.0421708486477852	-1.45322365238512	0.146161667127289	0.178540961761415
ATP6V1E1	2807.23889609607	-0.201212458556843	0.0489459219690495	-4.11091364637237	3.94096581210274e-05	6.11137958955743e-05
ATP6V1E2	80.9670690652877	0.0484794093155853	0.0532568508013225	0.910294329952784	0.362667307993437	0.422916291920342
ATP6V1F	2620.58082794199	0.695945245973296	0.0450024718545937	15.464600438437	6.01452974376042e-54	5.32021522135488e-53
ATP6V1G1	1775.7331851728	0.333426658834732	0.0313007534760324	10.6523524773946	1.70013416368882e-26	5.94282481516547e-26
ATP6V1G2	2212.23410305669	-1.84325279447194	0.0902270218080032	-20.429055038459	9.22703123761612e-93	2.95966731752855e-91
ATP6V1G3	0.0256754961323374	0.188855487395223	3.37522426025427	0.0559534634836371	0.955378879803592	0.999641322860956
ATP6V1H	1461.8128749613	-0.414522354796309	0.0489071368858689	-8.47570275405101	2.33664673795475e-17	5.91940553181814e-17
ATP7A	227.63121474718	0.260795942458165	0.0473744708340799	5.50498903452777	3.69191248108646e-08	6.61467652861325e-08
ATP7B	150.809203637437	-0.96851463545727	0.0616697729565016	-15.7048516481552	1.40105044611085e-55	1.30943059845617e-54
ATP8A1	1914.12743832106	-2.07415619185441	0.0874207413618162	-23.7261336330918	1.93809564494862e-124	1.72281928115769e-122
ATP8A2	98.7387366587839	-2.67016974031439	0.183648788240291	-14.539544561659	6.80438464620747e-48	4.89594616485556e-47
ATP8B1	49.1014925413731	1.10286946022868	0.100109778239409	11.0166007719167	3.17835987886502e-28	1.1758982433509e-27
ATP8B2	721.648179636009	-0.129188947817074	0.0408251053817958	-3.16444860604524	0.00155377100732515	0.00220254595810973
ATP8B3	26.0390351111832	0.627322684357758	0.0809907196372934	7.74561193143045	9.51226152694076e-15	2.19589565911898e-14
ATP8B4	137.461032045334	0.143854609280605	0.0941899518102901	1.5272819076322	0.12669092640044	0.155755038082108
ATP8B5P	24.0883444588847	-1.68496889731129	0.0671887608687072	-25.0781362169169	8.61494377243323e-139	1.15387858379016e-136
ATP9A	7106.9038092097	-1.62462592822293	0.0629839027868137	-25.7943038830401	1.0272905066514e-146	1.81821247440631e-144
ATP9B	460.346503809673	-0.0451835349383791	0.0337137562110848	-1.34021064444677	0.180176871954225	0.217730195851536
ATPAF1	1814.10124864854	-0.0958056886074677	0.0453163883009659	-2.11415102128573	0.0345023706148976	0.0446611265965205
ATPAF2	338.859216518285	0.164143027226787	0.0291266154572022	5.6354995130819	1.74551637479069e-08	3.16920416719874e-08
ATPBD4	147.351147450488	0.524417218875099	0.0478513806074301	10.9592912935446	5.99671256094868e-28	2.19687364804446e-27
ATPIF1	1375.13506780601	0.0960052014937509	0.0433928660468468	2.2124650948408	0.0269345454250512	0.0351589288792829
ATR	444.571010662042	0.0375618898875552	0.0356161902349275	1.05462964005397	0.291594742376474	0.34394160288759
ATRIP	210.299233735302	0.0669772879992118	0.0427707339822184	1.56596068767623	0.117357820799161	0.14468462477155
ATRN	2478.32397547226	-0.56825869354515	0.0375656166922759	-15.1270960942854	1.07327997707864e-51	8.80249440861805e-51
ATRNL1	775.741908348391	-1.64936593683677	0.109310811718719	-15.0887721983162	1.91981566714125e-51	1.55523113893506e-50
ATRX	1642.69838872228	-0.54793329756694	0.0720550084903493	-7.60437489422165	2.86284255347041e-14	6.48943715694041e-14
ATXN1	1310.46189794363	-0.386935230446087	0.0419802172319525	-9.217084997635	3.05286524630798e-20	8.56937804836634e-20
ATXN10	3143.43191183396	-0.0309964235460414	0.0311641805054312	-0.994616994361182	0.319922578903168	0.375789599525805
ATXN1L	1108.46284595016	-0.403629677858053	0.0377793261736953	-10.6838771025802	1.21105708066723e-26	4.25350540575241e-26
ATXN2	1064.22383628322	-0.229314403337098	0.0295089497305944	-7.77101202959279	7.78615031034284e-15	1.80393709212162e-14
ATXN2L	2591.66730163114	-0.102664073721702	0.0331087979533163	-3.10080945452805	0.00192992437398176	0.00271730171641739
ATXN3	258.991365702052	-0.361418295043714	0.0329363953090798	-10.9732194932722	5.14086531960112e-28	1.88997353914045e-27
ATXN3L	0.00160418306537	-0.0625384665237017	3.39376039627614	-0.0184274843304563	0.98529782683783	0.999641322860956
ATXN7	420.84619246503	-0.372085994026192	0.0387341272343752	-9.60615407118243	7.53094805790838e-22	2.23381689887652e-21
ATXN7L1	174.258272008285	-0.105468803255054	0.0501277237947085	-2.10400144413074	0.0353783210374434	0.0457471922977978
ATXN7L2	249.643298395419	-0.387684517761168	0.0643151052397713	-6.02789214626723	1.6611183657094e-09	3.14501904139995e-09
ATXN7L3	1485.75236684382	-0.490771193556081	0.0493255143717002	-9.94964167748557	2.53092851947136e-23	7.92334113099822e-23
ATXN7L3B	3502.55085888727	-0.542523061680093	0.0391339533870179	-13.8632316626632	1.05801472385042e-43	6.66021780593425e-43
ATXN8OS	0.0386760094620472	-0.0612675363548908	1.51360057475937	-0.0404780081195669	0.967712039647797	0.999641322860956
AUH	186.313213344696	-0.0124770991283187	0.0432974353649114	-0.288171782535421	0.773215247292947	0.845978907555365
AUP1	2301.1033304201	0.478548025569531	0.0333074418503643	14.3676007217677	8.26450677951449e-47	5.72822789826279e-46
AURKA	145.142144457337	1.79692138325941	0.0934859477988001	19.2212993029362	2.45543818863159e-82	5.5818980749133e-81
AURKAIP1	1359.20330570736	0.192420645959752	0.0543143835774838	3.54271987060755	0.000396023136301546	0.000581810318750875
AURKAPS1	4.75583514001772	1.00231518909804	0.102100495195173	9.81694738289018	9.51821690931158e-23	2.92209406525141e-22
AURKB	126.666210797885	1.82177232922655	0.163279248870889	11.1574026817522	6.58884580908335e-29	2.49638169865174e-28
AURKC	20.4088738180434	0.652476164041033	0.110509234167453	5.90426826279828	3.54215382825939e-09	6.61293231659314e-09
AUTS2	1079.40730299788	-0.242472914767095	0.0548139949120786	-4.4235585301896	9.70883130522405e-06	1.55849188568675e-05
AVEN	147.29963120962	0.532114769191424	0.0428470713736742	12.4189297455313	2.06302848996503e-35	9.66794651455717e-35
AVIL	91.4712955413622	1.49914504360647	0.123112760955093	12.1770077445773	4.12126236029694e-34	1.85714443664847e-33
AVL9	289.212359887737	-0.262208162268316	0.0642422058429326	-4.08155602423421	4.47351910290677e-05	6.91504750287905e-05
AVP	0.227525707268496	-0.629485747849567	1.41662798584196	-0.44435501355385	0.6567859327584	0.731759641696817
AVPI1	175.163479466085	-0.842041176859072	0.0649456825562805	-12.9653141473935	1.92440375141161e-38	1.00440904592502e-37
AVPR1A	7.52333815896606	0.680748043624341	0.156764276235772	4.34249473139214	1.40873864856937e-05	2.24012724455243e-05
AVPR1B	0.203678996483206	-0.145632976621854	0.609837102229864	-0.23880635679487	0.811255740819758	0.882388068601924
AVPR2	1.14466767131086	-0.891103361464149	0.230136013229859	-3.8720726450324	0.000107913776400655	0.000163520470080278
AWAT1	0.0099801976509646	-0.0264409758152655	3.39376039627614	-0.00779105556310879	0.993783699942704	0.999641322860956
AWAT2	0.458410447531539	-0.799347402576213	0.396501948505199	-2.01599867438163	0.0438001144074085	0.0562374291015
AXIN1	812.180664035188	-0.458806713882432	0.0357623975680504	-12.8293052223189	1.12367300492783e-37	5.72758292020684e-37
AXIN2	486.251208710316	-0.766091654903351	0.0556151321254265	-13.7748779086889	3.60992856020204e-43	2.23344612512125e-42
AXL	1333.3653706094	0.113745060264954	0.0662257530951485	1.71753517248091	0.0858814336617359	0.107340962135977
AZGP1	591.165069514182	0.157713327921866	0.164986089038842	0.955918943473692	0.339113187532608	0.396803064545121
AZI1	426.341929244586	-0.824768255008702	0.058876256821788	-14.0085035892344	1.38288138884305e-44	8.90895605168535e-44
AZI2	884.158986350213	0.194240973872733	0.0269545018372463	7.20625352475728	5.75122801622679e-13	1.24461346032384e-12
AZIN1	4716.61510087969	-0.270636724912111	0.0350688720681816	-7.7172919729478	1.188272429442e-14	2.73293008108004e-14
AZU1	2.57312525020405	-1.03863460382655	0.213570533785708	-4.86319243303803	1.15507450903102e-06	1.93927686902023e-06
B2M	29768.7608167879	1.28976887996922	0.0722771246754738	17.8447729590837	3.17390460665058e-71	5.09443813907972e-70
B3GALNT1	764.188168102751	0.696654473930296	0.0624949878480361	11.147365539526	7.37578496839792e-29	2.78867414511829e-28
B3GALNT2	359.379246225446	0.543919132254524	0.0506052032546474	10.7482847073551	6.03738876475285e-27	2.14478776852502e-26
B3GALT1	39.3840756820938	0.298990616288344	0.114591584096874	2.60918477255346	0.00907582218886849	0.0122604622631825
B3GALT2	298.506374750944	-1.02020528689831	0.0942539047814923	-10.8240108382081	2.64924172397548e-27	9.52583324766297e-27
B3GALT4	129.70599553799	0.229682184896707	0.0670437232931933	3.42585664421214	0.000612863753439274	0.000890006909943826
B3GALT5	10.5815370339422	-0.437634208588092	0.117849128785904	-3.71351246374627	0.000204402393273886	0.000304400018170554
B3GALT6	656.065493917411	0.200340987916514	0.0509801224370328	3.92978632336478	8.50213815867893e-05	0.000129455322774017
B3GALTL	594.576114937929	0.232715435777881	0.0685687316328563	3.39390025505984	0.000689047845104683	0.000996715953992274
B3GAT1	3764.01009714486	-0.910021926510307	0.0674725184705063	-13.4872974529341	1.8578671293848e-41	1.08895624204006e-40
B3GAT2	620.69195461518	-1.08199673831322	0.12769216166874	-8.4734781224876	2.38172587723342e-17	6.03206235650928e-17
B3GAT3	1149.36901341963	0.109770717538841	0.0432991330946601	2.53517125386463	0.0112392365740643	0.0150812554394962
B3GNT1	3613.74097756315	-0.701052452564809	0.0480838605248668	-14.5797871658466	3.77692368129431e-48	2.73747561734176e-47
B3GNT2	250.673500944866	0.414598125695616	0.0524681087559446	7.90190718754737	2.74667913673764e-15	6.4580026719903e-15
B3GNT3	0.261079136108145	0.211978673346663	0.668516629044096	0.317088108413651	0.751176747780988	0.825511512987167
B3GNT4	15.455457941741	-0.888225856859816	0.167622795526025	-5.29895623129559	1.16466546241773e-07	2.0452837935424e-07
B3GNT5	319.261368090901	1.47604222021515	0.102065022668118	14.4617831028633	2.11253294675495e-47	1.49080600226142e-46
B3GNT6	0.277682765957168	-0.44450280767774	0.273914053454539	-1.62278204448357	0.104636005401919	0.129629369107071
B3GNT7	134.1819601821	1.28598654112659	0.139910915917973	9.19146681793249	3.87520485730383e-20	1.0853092100358e-19
B3GNT8	8.46807059678871	1.39611155152571	0.114744764301021	12.1671046171933	4.65296152170682e-34	2.08914283680168e-33
B3GNT9	501.591142129559	0.421313855394333	0.078561456129077	5.36285700588481	8.19158526430847e-08	1.44802741835551e-07
B3GNTL1	84.7429324776849	-0.11087066412018	0.0551839369264256	-2.00911117066546	0.0445253452527537	0.0571204969547849
B4GALNT1	702.552176749654	0.213882422907379	0.109764286792208	1.94856113183949	0.0513478576530739	0.0654704175890451
B4GALNT2	0.0461686950435424	-0.139861122920578	3.21508486181346	-0.0435015338418438	0.96530174185623	0.999641322860956
B4GALNT3	35.4743298597385	-0.0640220457136378	0.137681445311736	-0.465001261198849	0.641930553421469	0.716739290327464
B4GALNT4	1627.25889460013	-0.885053078204126	0.0725142484118301	-12.205229973255	2.91483769805735e-34	1.31949823449625e-33
B4GALT1	587.314659369957	0.849382734438888	0.0800948045242965	10.6047169911156	2.83320447607453e-26	9.81349158295044e-26
B4GALT2	1476.20945287021	0.151632108246477	0.0430160920282074	3.52500892333608	0.00042346852649547	0.000621210434449767
B4GALT3	714.479036396092	0.408083289245512	0.0339709501364445	12.0127134391721	3.04681101805034e-33	1.33651106020828e-32
B4GALT4	526.291925171624	0.204463077611916	0.0415933919986973	4.91575867672249	8.84392869857121e-07	1.4943163875876e-06
B4GALT5	2343.79437604024	0.508633115142681	0.0485579870571256	10.4747570063871	1.12826985654707e-25	3.8290863493122e-25
B4GALT6	314.079407509386	-0.881888326513551	0.0918674031582695	-9.59957826384001	8.02721951818889e-22	2.37888432514664e-21
B4GALT7	553.740602428511	0.311505883481079	0.0363100063637823	8.57906441437018	9.56479054176626e-18	2.45599537447452e-17
B9D1	211.270845325618	0.505719298846519	0.0539422957671132	9.37519050041691	6.90509620071421e-21	1.98462696805506e-20
B9D2	93.2367759243093	0.813264535594643	0.0710321361654302	11.4492478967631	2.37194517237982e-30	9.45677175222951e-30
BAALC	12592.3500061187	0.042855109774116	0.0672601310327798	0.637154717305416	0.524024070192936	0.595046637075934
BAAT	9.43469245602909	-0.894977585197537	0.114155530382815	-7.83998446852527	4.50602160996489e-15	1.05135200534762e-14
BACE1	3401.14907354934	-0.399035395068069	0.0442076949428443	-9.02637867873406	1.77446702624943e-19	4.85309876674151e-19
BACE2	246.127821442422	1.76248699383845	0.0873248346655079	20.1831128634774	1.37789692919446e-90	4.11976633897765e-89
BACH1	682.956918657901	0.149237759330307	0.0444583573592576	3.35679877068673	0.000788504777859308	0.00113701390932604
BACH2	232.56812289838	-0.471782689107196	0.0644855950160539	-7.31609422212425	2.55292442138128e-13	5.60117551799016e-13
BAD	1351.91026636074	0.101992794315881	0.0513366323937101	1.98674493359206	0.0469506696820062	0.0600880060111311
BAG1	1362.3430798326	-0.377740984331834	0.0440224714676678	-8.58064010806992	9.43466352303744e-18	2.42320983437641e-17
BAG2	140.108374507836	0.161715265905311	0.0619886019166586	2.60879034056505	0.00908628939742487	0.0122737659097208
BAG3	1485.40962301487	-0.523003020306557	0.0795672924965666	-6.57309057398334	4.9281458836675e-11	9.91883803959192e-11
BAG4	171.940245952089	-0.0421103768644377	0.0674079016309906	-0.624709801752345	0.532161538844368	0.603526413668511
BAG5	1134.34818244407	-0.00496299925438511	0.0325366848900521	-0.152535492511178	0.878764598975062	0.945389701806287
BAGE	0.0447270286636683	0.221742318694616	2.94230830278092	0.0753633867956789	0.939925589439187	0.995998554522532
BAGE2	3.6299939539259	-4.1145167560926	0.197293847662642	-20.8547646307153	1.37975373996843e-96	4.91921913442342e-95
BAHCC1	956.21307915337	-0.816058872140352	0.0596387752142315	-13.6833606862137	1.27653678560524e-42	7.77890830035436e-42
BAHD1	807.620534205514	-0.447067507268782	0.0327570870018151	-13.6479628742327	2.07601159582768e-42	1.2574337756501e-41
BAI1	2809.11206959154	-1.35222172189974	0.119559145963623	-11.3100650811873	1.17002708146917e-29	4.55130432416863e-29
BAI2	3318.23104186488	-0.310507119288089	0.0606072961422833	-5.12326302363225	3.00292991428662e-07	5.18122375236346e-07
BAI3	1063.55980973526	-1.46344859874841	0.0747063869590033	-19.5893371145296	1.90656408013907e-85	4.82064027558633e-84
BAIAP2	1468.03354061085	-0.500678225446911	0.0621471519957061	-8.0563341902056	7.86165131050512e-16	1.88441975729314e-15
BAIAP2L1	15.180978130665	0.485718537821332	0.108337838028207	4.48336930717476	7.34736091327264e-06	1.18730525298609e-05
BAIAP2L2	40.0650373246603	-1.30356144423912	0.0958035745195295	-13.6066055027351	3.6584525725711e-42	2.199621029605e-41
BAIAP3	1534.23896923004	-0.875368047723443	0.114602204990478	-7.63831767282467	2.20078322573695e-14	5.00989043222136e-14
BAK1	254.610747203661	0.687727103840573	0.0371670824814289	18.5036612487463	1.9291271239823e-76	3.66645129230117e-75
BAMBI	365.098925805772	-0.1566764567691	0.0850130177152869	-1.84297018244686	0.0653333641091275	0.0824696431950608
BANF1	2582.36466042923	0.247762917352239	0.0443639124314495	5.58478510512522	2.33989362796051e-08	4.22707658680954e-08
BANF2	0.0772128843540846	0.331150242591707	0.972067431322076	0.340665916706335	0.733355099958481	0.808203462511777
BANK1	18.7314877159085	1.26596588508929	0.177034539130243	7.15095422231665	8.61767281161857e-13	1.85179542704298e-12
BANP	231.535251283056	0.0129215564946238	0.0334599905883867	0.386179322450516	0.699363866496917	0.774539914272775
BAP1	2591.20759601296	-0.260636528550625	0.0351414144415764	-7.41679106240702	1.19992012716423e-13	2.66360769101641e-13
BARD1	104.199717877804	0.718676352801822	0.0914572401902684	7.8580585999171	3.90132792075445e-15	9.11873875405206e-15
BARHL1	11.421297593607	-0.877354584827839	0.267317850262005	-3.28206509205398	0.00103049813986269	0.00147470146018612
BARHL2	0.378899503549986	0.644837783065031	0.604631857352977	1.06649653871708	0.2861992425236	0.337778493959593
BARX1	6.86607840700476	2.76461432454867	0.308495743101807	8.96159634733213	3.20011416381676e-19	8.66255128626788e-19
BARX2	8.86274370051615	-1.15167570786791	0.194416593587151	-5.92375211713421	3.14677684368944e-09	5.88810245161938e-09
BASE	0	NA	NA	NA	NA	NA
BASP1	2478.41605316588	-1.40251979173239	0.0905388723968721	-15.4908025094958	4.00262856720063e-54	3.56602723989294e-53
BAT1	5189.69686758262	0.0325616753053101	0.0316503438657929	1.02879372948937	0.303576613943813	0.35747886528503
BAT2	8415.20329540579	-0.548745326467862	0.0355087810915915	-15.4537922620443	7.11323616382589e-54	6.2780801636474e-53
BAT2L1	6768.05448213372	-0.671133570316472	0.0450909913700934	-14.8839834726189	4.18803408113407e-50	3.25566272903218e-49
BAT2L2	3013.24146493135	-0.510527266774467	0.0388507156536909	-13.1407429228647	1.92329121686041e-39	1.03997277118996e-38
BAT3	4485.84862851714	-0.27865123451583	0.02780949668692	-10.0200027944731	1.24499425657283e-23	3.94178584060745e-23
BAT4	580.77598674273	-0.376846718062877	0.0407595833902765	-9.24559788687086	2.33929176961128e-20	6.600965231175e-20
BAT5	1135.41880063559	0.0559689933597027	0.0237290460833149	2.35867017844671	0.0183405483332377	0.0242360302386354
BATF	17.6364647623427	1.44584220196554	0.148009623167797	9.76856890126933	1.53606417029707e-22	4.67804579010582e-22
BATF2	138.838304839704	0.937511050770894	0.104851739630106	8.94130182368201	3.84612331290933e-19	1.0385737969187e-18
BATF3	84.9710907205016	1.6173642501364	0.111723445355443	14.4764981512236	1.70568376927101e-47	1.20670126189362e-46
BAX	723.311140417663	0.561690404381442	0.05413535419682	10.375666931804	3.19970283275663e-25	1.0687061373839e-24
BAZ1A	535.475815178198	0.038878606477191	0.0590556782941195	0.658338158162554	0.510320863701125	0.580650354789771
BAZ1B	2486.91725205318	-0.0243047932194114	0.0366072233798075	-0.663934354355265	0.50673232722054	0.576964671021985
BAZ2A	1722.65385542079	-0.608590995089248	0.0407539261838988	-14.9333095501776	2.00083969777949e-50	1.56893375510612e-49
BAZ2B	976.488676617982	-0.991043560744016	0.0463166484376363	-21.3971345979064	1.42075602500785e-101	5.75943694963818e-100
BBC3	125.602418621216	-0.0634919084962381	0.0647245282648582	-0.980955909580736	0.326614484559801	0.383195959246504
BBOX1	1109.92920403562	0.0473944528050805	0.0889836400633367	0.532619847551146	0.594296760196549	0.668032020265166
BBS1	1260.78271472526	-0.379782408005845	0.0409942093812744	-9.26429400000392	1.96372113793982e-20	5.55700843931206e-20
BBS10	648.420838971535	-0.128273699538231	0.041843560719726	-3.06555410992449	0.00217267060092513	0.00304761175503388
BBS12	130.76777737971	0.790430364137977	0.0497830495586454	15.8774998949559	9.07230453826977e-57	8.83736082860549e-56
BBS2	2623.31672113213	-0.516234479080959	0.0420808784968189	-12.2676735258743	1.35078989310991e-34	6.16548654181851e-34
BBS4	500.287894127868	0.528890224634734	0.0419305347289981	12.6134862828011	1.7794383641517e-36	8.68812972723626e-36
BBS5	323.712968764953	-0.0967081474254586	0.039906164687584	-2.42338867146377	0.0153764654542579	0.0204267306460095
BBS7	311.423887375941	-0.112795546396681	0.0421167096257204	-2.6781661577807	0.00740264856453838	0.0100618967700798
BBS9	407.776780322803	0.394611306495364	0.0410919087569227	9.60313887655277	7.75461603269834e-22	2.29947275416872e-21
BBX	1865.18287641847	-0.552944610214434	0.0443404663920452	-12.4704283740604	1.08242589701969e-35	5.12220781967567e-35
BCAM	759.937259047749	0.613748097261971	0.0715882647723849	8.5733059631126	1.00555886819374e-17	2.58001468343315e-17
BCAN	65915.1254461254	-1.26491385565539	0.0950882890639105	-13.3025198802895	2.23796710187697e-40	1.25426129093885e-39
BCAP29	1777.4070291968	0.503424048940126	0.0422807665018575	11.906691637627	1.09225539999431e-32	4.70998015968833e-32
BCAP31	3653.91575759574	0.477921410990636	0.0347295833184146	13.761219263959	4.36109302487997e-43	2.68895636181013e-42
BCAR1	2158.15917815683	-0.725043551857041	0.0528678601732475	-13.714259466547	8.3413676113932e-43	5.10803010605589e-42
BCAR3	377.296680476643	-0.123196416599647	0.0778288411429503	-1.58291469833618	0.113440908138355	0.140049646273239
BCAR4	0.0823170307408665	0.268903207214167	0.697833450038614	0.385340093971259	0.699985459994883	0.775141711271916
BCAS1	2785.39051892315	-1.031208232882	0.139967221783648	-7.36749804519217	1.73859984404407e-13	3.84045740009868e-13
BCAS2	721.797580768639	0.498082689391753	0.0370196105724307	13.4545631812423	2.89444719195448e-41	1.68606014358254e-40
BCAS3	748.058368553483	-0.389781048243409	0.034059841676242	-11.4440064621703	2.51974644469886e-30	1.00399866880936e-29
BCAS4	543.168330057829	0.964225406596129	0.0722287468834292	13.3496072990482	1.19074981563908e-40	6.76145333583885e-40
BCAT1	1054.52168217412	1.9584979615085	0.127479237326678	15.3632701495512	2.88640372890451e-53	2.50842530109926e-52
BCAT2	327.506637359426	0.46117328975941	0.0623320995470679	7.39864841888042	1.37577567308548e-13	3.04783204823128e-13
BCCIP	1027.963969789	-0.612426719582656	0.0390556348900227	-15.6808798860189	2.04402993270252e-55	1.90139865584054e-54
BCDIN3D	206.035254044567	0.249974590201251	0.03282772897636	7.61473906346869	2.64224709707212e-14	5.99899945083732e-14
BCHE	1669.09886955797	-0.315514465267822	0.0743809865740823	-4.24186986218009	2.21665218843111e-05	3.48819387868491e-05
BCKDHA	1056.90622304757	-0.105068815079673	0.043811407992154	-2.3982067661119	0.0164755621486457	0.021841441080225
BCKDHB	644.180153303953	-0.0808601940920424	0.0527728774426986	-1.53223015326085	0.125465650120077	0.154296518539008
BCKDK	1002.89358055376	0.454788663884907	0.0310381337364139	14.652577624258	1.29700356132908e-48	9.54007480379455e-48
BCL10	222.161218034131	0.670190817274059	0.0383260723885144	17.4865509431878	1.81409540485018e-68	2.6306373965139e-67
BCL11A	141.840756407059	-0.381234602177491	0.153644183725364	-2.48128235598519	0.0130910628530869	0.0174844454208827
BCL11B	103.298510445112	-1.18058725901103	0.108494094636957	-10.8815808174768	1.41094552701372e-27	5.11600021620504e-27
BCL2	662.527206165166	-0.79469076840701	0.0576826117398211	-13.776955384605	3.50755632649827e-43	2.17078642086092e-42
BCL2A1	70.2645400387051	1.91155907773237	0.150269767647099	12.7208493608746	4.52910118253411e-37	2.25295791069946e-36
BCL2L1	2613.03711942345	0.107104759341379	0.0433794970862612	2.4690180047131	0.0135484401431151	0.0180734003335781
BCL2L10	0.5872858742566	-0.545971257925612	0.270912240495688	-2.01530671676794	0.043872521591027	0.0563231005439368
BCL2L11	445.900585100119	-0.148555199469404	0.0588384971737866	-2.52479595171556	0.0115765484072709	0.0155160188693259
BCL2L12	82.5267482269678	1.55038763730599	0.0902417355214006	17.1803836478557	3.72439972716671e-66	4.99518104138199e-65
BCL2L13	1316.11934040674	-0.222329394609285	0.030617525986168	-7.26150750095637	3.82799771447478e-13	8.35341244980555e-13
BCL2L14	2.06939040502753	0.380069759642907	0.168846437752534	2.25097884623393	0.024386877217273	0.0319131942882231
BCL2L15	10.6852318655967	0.223229001252059	0.0786188440956621	2.83938289629949	0.00452008824452617	0.00622406982990013
BCL2L2	1559.56796361914	-1.16023043269487	0.0603898915178995	-19.2123284796922	2.91876388966004e-82	6.61998359093031e-81
BCL3	200.611794645803	1.884997795903	0.0879168600311482	21.4406860667585	5.57852652874594e-102	2.28950582565902e-100
BCL6	2502.69532174364	-0.399324688866346	0.0595224088845289	-6.70881263627989	1.9621440942843e-11	4.01274965242935e-11
BCL6B	168.265412153496	0.46192251271027	0.0813625796611527	5.67733366658259	1.36810449652734e-08	2.49677181317082e-08
BCL7A	1122.00246993067	-1.29298714703112	0.0721013041887896	-17.9329231499831	6.52567857670617e-72	1.07351474212487e-70
BCL7B	1151.42833311233	0.650251548906704	0.0330135904742379	19.6964807391709	2.3113890724958e-86	6.00506757327448e-85
BCL7C	639.879612277385	0.408023186592309	0.0590373606053627	6.91127080222563	4.80331111631284e-12	1.00322448908091e-11
BCL8	2.83020162358935	-0.57143346688944	0.172987660524034	-3.30331923767504	0.000955475473927417	0.00137080338131745
BCL9	845.678135394113	-0.238572914907361	0.0394541129525986	-6.0468452349693	1.47709521475197e-09	2.80168964137675e-09
BCL9L	1348.9947764924	-0.508709598125705	0.0477231116554463	-10.6596066450677	1.57261154092116e-26	5.50483464165286e-26
BCLAF1	2961.12952506352	-0.412817577115996	0.0315525197748517	-13.0835058518852	4.09126140173397e-39	2.18542373394159e-38
BCMO1	47.3161730010829	0.600111895552974	0.114989221031888	5.21885347311425	1.80034119256115e-07	3.13383943274848e-07
BCO2	51.4251642206546	-0.343550762607083	0.102122993434887	-3.36408825330927	0.000767969813985131	0.00110804757425047
BCOR	644.483776654146	-0.441949837909986	0.0640304536888178	-6.90218189078938	5.12098052400932e-12	1.06833505501407e-11
BCORL1	323.933263967387	-0.128738652565423	0.0527355179736287	-2.44121338923419	0.01463800246325	0.019473130852225
BCORL2	0.904063014644851	-0.465722814343524	0.261357976792922	-1.78193457134283	0.0747599020455305	0.0938784706859592
BCR	4239.92545946633	-1.50352838539923	0.0641424526974511	-23.4404567048771	1.65404599863238e-121	1.34930674201192e-119
BCS1L	438.003948573266	0.096641572744318	0.0330476158437636	2.92431300343124	0.00345217426460115	0.00478448230771087
BCYRN1	0	NA	NA	NA	NA	NA
BDH1	316.994115245963	0.26722860294854	0.0983140750808241	2.71811134599854	0.0065655739346447	0.00895850367818863
BDH2	1061.26696121425	-0.29507255552818	0.0720495970585658	-4.09540882356815	4.2142405875246e-05	6.52494658802625e-05
BDKRB1	2.51195447146338	2.62824161014678	0.22475214472389	11.693955638891	1.36860449612786e-31	5.68759893642402e-31
BDKRB2	77.1708548641739	2.08070094440609	0.168524360244546	12.3465885963713	5.08210905847472e-35	2.3466724403947e-34
BDNF	63.8741771205359	0.137963556459183	0.164580713585237	0.838272926722556	0.401877437398954	0.465654456485823
BDNFOS	273.920078389948	-0.461430615022603	0.0542820715739606	-8.50060805792744	1.88600149664356e-17	4.79126075457713e-17
BDP1	730.016183069847	-0.86548886645939	0.0446137434626273	-19.3996019900102	7.77711547546487e-84	1.84851031259161e-82
BEAN	63.2545874429634	0.516373464765108	0.122268723487197	4.2232669977877	2.40786285888333e-05	3.78067845161538e-05
BECN1	1328.76070043392	-0.153783032286987	0.0218738909964619	-7.03043790022822	2.05886343732108e-12	4.36267770368954e-12
BEGAIN	181.723372972958	-0.352604472554536	0.123022289046025	-2.86618364272688	0.00415453165457173	0.00573464807385108
BEND2	0.121151048576367	0.167517057465504	0.686180908635142	0.244129580635966	0.807130463483613	0.878383045711538
BEND3	125.568042188054	0.0567254024837856	0.052601090566761	1.0784073461707	0.280852010074541	0.331744094607772
BEND4	37.6807355305747	-1.76763919202411	0.164659332431781	-10.7351291051568	6.96215864509278e-27	2.46668223095039e-26
BEND5	245.562655349855	0.26166371380859	0.0477091838682684	5.48455648562506	4.14508027611102e-08	7.41253282032916e-08
BEND6	503.228384467376	-0.156210887333242	0.0564060258706149	-2.76940069650645	0.00561595208445566	0.00769403678002382
BEND7	320.450511932608	-1.13297215654623	0.0569640289135608	-19.8892560472757	5.04174346331422e-88	1.39002059350873e-86
BEST1	466.137730173337	-0.932310437266676	0.0910598792392732	-10.2384326122034	1.33379594911034e-24	4.36372950969041e-24
BEST2	0.446306732971065	0.988187333071368	0.262297671907775	3.76742700720126	0.000164938744413048	0.000247171207325359
BEST3	648.77773999514	-1.13436015244477	0.116503723642939	-9.73668580689621	2.10301314544193e-22	6.36847381333569e-22
BEST4	18.9802821151272	1.85443144608589	0.132239385725527	14.0232914415899	1.12283828551312e-44	7.25253285556419e-44
BET1	402.006364674158	0.93883951474893	0.0467032640297007	20.1022248498923	7.05583580764102e-90	2.05687990021865e-88
BET1L	1029.88488949156	0.255467844028629	0.0323321419481801	7.90135848215924	2.75879955474857e-15	6.48573097412012e-15
BET3L	0.199282016082668	0.63005161387331	0.382974464085308	1.64515306621844	0.0999382494881726	0.124080916923716
BEX1	3141.48137360344	-0.920700576606242	0.0812441204129827	-11.3325194724998	9.05616453470195e-30	3.54223262769133e-29
BEX2	987.979528968094	-0.670977927187725	0.0930317672855346	-7.21235279910731	5.49932664374405e-13	1.1911402104342e-12
BEX4	2596.96839775029	-0.964786899473492	0.0506785040958123	-19.0373989265641	8.35764254521152e-81	1.82862635953342e-79
BEX5	210.716122915231	-0.826136547537305	0.14122836899171	-5.8496501335776	4.92608072010756e-09	9.15094162821593e-09
BEYLA	0	NA	NA	NA	NA	NA
BFAR	867.952871196473	0.452405987281809	0.0246557900623028	18.3488740834759	3.37023983944232e-75	6.20894649974582e-74
BFSP1	19.3531906971567	0.174541985865757	0.122666917300297	1.42289371663646	0.154766967998593	0.188367753830424
BFSP2	0.284440140733502	0.711415415908571	0.371264610534456	1.91619506875285	0.0553402708231428	0.0703527344659245
BGLAP	63.7288406384224	-0.0499041202103168	0.0704231241984725	-0.708632580254076	0.478552512791687	0.547624703631114
BGN	3230.11682800665	1.71879509616334	0.10731548666312	16.0162819888141	9.8358395183575e-58	9.88220206651803e-57
BHLHA15	1.64002565281046	-0.196167652930622	0.2043161429264	-0.960118227179371	0.336995715909086	0.394441785336904
BHLHB9	331.489136786904	-0.141319705315882	0.0638836078099516	-2.21214346153235	0.0269567539374658	0.0351856017187322
BHLHE22	30.0047661642024	-0.215959415296294	0.196405538513301	-1.09955868317669	0.271524452227421	0.321281514743877
BHLHE23	0.0516760034702054	-0.207569675634206	2.49465421033958	-0.0832057905155324	0.933687908542553	0.991349513178309
BHLHE40	1477.07174323486	0.855375486823015	0.0940964831241359	9.09040867865985	9.86674775467888e-20	2.72217871594989e-19
BHLHE41	1888.96534945993	-0.112512827753873	0.0839827147761259	-1.33971410728744	0.180338309345019	0.217911996717239
BHMT	3.27330562254232	-1.2094761050779	0.207858599637229	-5.81874460421064	5.92912462199908e-09	1.09792655190927e-08
BHMT2	41.869833590945	-0.109113136954717	0.130584433401471	-0.835575375353182	0.403393826626289	0.467274926968558
BICC1	32.9042073534231	0.858995767616256	0.129937902533626	6.61081755874856	3.82203286202536e-11	7.73103647182945e-11
BICD1	245.717663228582	0.657878870539039	0.0709458380020892	9.27297342685086	1.81027539436036e-20	5.13010566724881e-20
BICD2	1072.31100332405	-0.381886874561359	0.035982923394031	-10.6130030175566	2.5927921692644e-26	8.99176332598465e-26
BID	1284.83615864551	-0.492822522163722	0.060379375072912	-8.16210041207958	3.29248308685276e-16	7.98274122195232e-16
BIK	2.11113471941688	1.14883290516463	0.154521598957691	7.43477230959269	1.04748231806062e-13	2.32782981960937e-13
BIN1	3363.0361065233	-0.8748990806981	0.0664382907892576	-13.1685970590857	1.33047002785523e-39	7.23762551102475e-39
BIN2	219.195939530411	0.41039762434678	0.089366897614957	4.59227784895258	4.38434111160955e-06	7.1625839669883e-06
BIN3	337.412181314285	0.266445012879844	0.0370145178127273	7.19839210733222	6.09267274122985e-13	1.31634933786811e-12
BIRC2	1155.79569515835	0.2722250174315	0.0283899462930003	9.58878240282612	8.91306053401338e-22	2.63706864127981e-21
BIRC3	87.7681413611905	2.1111133646318	0.122357929714531	17.2535884642472	1.05160303850029e-66	1.43665934060587e-65
BIRC5	250.960982756581	2.19268654865882	0.152916898361241	14.339072870017	1.24710332782642e-46	8.61070333246362e-46
BIRC6	1696.05609598686	-0.8519594865388	0.0471240858384524	-18.0790666042718	4.65901773805409e-73	7.92072972739675e-72
BIRC7	11.4250110816018	-0.240483953366773	0.143458237199193	-1.67633422842676	0.0936727440025916	0.116630538556835
BIRC8	0.00156745596924046	-0.0625384665237021	3.39376039627614	-0.0184274843304564	0.98529782683783	0.999641322860956
BIVM	707.437345692598	-0.37393310630909	0.0470866234791821	-7.94138714308985	1.99932572554902e-15	4.7232313022951e-15
BLCAP	2522.0018864374	-0.422722590687683	0.0400277742154323	-10.5607318661427	4.53115130550994e-26	1.55749978028652e-25
BLID	0.0319115926355835	0.184511882984883	1.65131627737215	0.111736246722226	0.911032538547779	0.973108963595262
BLK	3.74512318072249	-1.2489608146622	0.261087811112862	-4.78368105097907	1.7211371821845e-06	2.86803146960687e-06
BLM	357.155577935653	0.519531021946783	0.110049389418919	4.72088963591711	2.34815329682393e-06	3.88705159105977e-06
BLMH	856.295458776268	0.0509063309152191	0.0345478198239076	1.47350342726956	0.140615340387324	0.172126583456708
BLNK	128.503496878828	0.210202186009968	0.110970329413698	1.89421971729338	0.0581958520170705	0.0738031075768913
BLOC1S1	1550.11706188136	0.585609920523378	0.0596890381481583	9.81101285414912	1.00950139113717e-22	3.09437854901998e-22
BLOC1S2	1035.77749875619	-0.266141271045348	0.0467938842762821	-5.68752252909777	1.28895603071392e-08	2.35406075150562e-08
BLOC1S3	284.645541019582	0.116844874064856	0.0332898793038411	3.5099218293463	0.000448238449151535	0.000656284125676259
BLVRA	848.496600898523	0.255549511379628	0.0413564058472518	6.17920020234567	6.44271530537623e-10	1.24126684321579e-09
BLVRB	587.403145266394	0.581522432625352	0.0751625608502478	7.73686295473572	1.01899794388715e-14	2.34769830795849e-14
BLZF1	325.230159983489	0.288898396608662	0.0333319423115544	8.66731359091897	4.42435163934057e-18	1.15036624536527e-17
BMF	276.060140553515	0.216418255926321	0.0914689705352282	2.36602920815612	0.0179800258517066	0.0237722972359355
BMI1	1477.65771516854	-0.080792214417849	0.0379907080143209	-2.12663092215585	0.0334507611460731	0.0433593433726939
BMP1	768.975569845683	0.934425454172577	0.0589960652660892	15.8387758566279	1.68060730762809e-56	1.61878905049133e-55
BMP10	0	NA	NA	NA	NA	NA
BMP15	0.0535535841953262	-0.167151789995766	0.99375641732928	-0.168201972919065	0.866424388894462	0.934192584229258
BMP2	1124.80805848652	-2.16041151239279	0.111249248992496	-19.4195604191317	5.27394082538111e-84	1.26415149917206e-82
BMP2K	435.513570145485	-0.0725166405224492	0.0713657453147582	-1.01612671741345	0.309569047722609	0.364220393868241
BMP3	3.02093860225032	-1.18958178828704	0.244728419836203	-4.8608240476657	1.16898121096343e-06	1.96229270428725e-06
BMP4	126.673479398826	-0.764325375361124	0.0914313629639356	-8.35955355562846	6.29560415011328e-17	1.56741724526119e-16
BMP5	4.02744862684584	2.70831425975443	0.47915930245449	5.65222097511436	1.58387783159107e-08	2.88153544930523e-08
BMP6	112.265697173805	-0.745747864129891	0.102657407774559	-7.26443303309965	3.7460614932373e-13	8.17821332383733e-13
BMP7	2718.61127491355	-0.464588548050682	0.0654464451953374	-7.09875909476869	1.25882014107881e-12	2.68578104150309e-12
BMP8A	157.033155135041	-0.160217153465348	0.0862315290742733	-1.85798808377095	0.0631707065240266	0.0798617930756236
BMP8B	143.055539641748	0.222786703006115	0.128113104152904	1.73898450497474	0.0820374885016818	0.102698398141385
BMPER	236.278419203709	0.391897443341981	0.117107213881739	3.34648422032942	0.000818433376128404	0.00117854168349509
BMPR1A	691.626227991556	-0.510455386033491	0.0486882175160283	-10.4841666439205	1.02142137645329e-25	3.47122166045492e-25
BMPR1B	883.458668530514	-0.697695028009718	0.0819734586965439	-8.51123081914237	1.72096660501266e-17	4.38267227789902e-17
BMPR2	2595.7043917624	-0.736138673146136	0.0398156985989445	-18.4886539493156	2.54836431198739e-76	4.83871894219599e-75
BMS1	779.00699196781	-0.644771445753218	0.0326661622722306	-19.738206171263	1.013113809152e-86	2.66705910210094e-85
BMS1P4	14.9812261107548	-0.371571355932917	0.0851806893076296	-4.36215483759458	1.28787668962177e-05	2.05238199359855e-05
BMS1P5	59.9508311479696	-1.26072062944609	0.0783651155244091	-16.0877786118161	3.10789829273453e-58	3.17894054989044e-57
BMX	2.60725960236213	-0.815590066579177	0.200469366131964	-4.06840248121647	4.73365646482913e-05	7.30747388071862e-05
BNC1	1.82589040865795	0.229300406061526	0.235024142928656	0.975646174917156	0.329239833973342	0.386001965274045
BNC2	83.8935050272075	1.00300435324355	0.113576115752005	8.83112040416683	1.03632357871675e-18	2.75856617441951e-18
BNIP1	242.120134572716	0.665424012638434	0.0409701002845911	16.241698409723	2.55744323816598e-59	2.72267439904212e-58
BNIP2	503.54518802333	0.182402164158595	0.0344933895490444	5.28803247646179	1.23639030494598e-07	2.1693189073238e-07
BNIP3	1694.78099458803	0.0772824830493252	0.0603171465105199	1.28126888489074	0.200099237939493	0.240806653331385
BNIP3L	3670.20564487702	0.233131629225282	0.0343482168699185	6.78729932643038	1.14252011129455e-11	2.35722066675602e-11
BNIPL	5.99799569810656	0.13670603605666	0.0848462039413703	1.61122159514792	0.107131432580478	0.132579996756325
BOC	983.874493562268	-0.101868959404614	0.0785659631689373	-1.29660422014516	0.194767399674711	0.234561006303269
BOD1	916.954929049716	0.793720599354309	0.0356562000494045	22.2603810348424	8.94836222070055e-110	4.83333472209665e-108
BOD1L	1275.07803651958	-0.919188656305744	0.0444401847239568	-20.6837271720481	4.85416164258688e-95	1.64767202467465e-93
BOK	672.492161056201	-0.98039080561268	0.127171242614987	-7.70921778739575	1.26591224752533e-14	2.90845833132761e-14
BOLA1	304.23450429992	-0.0893320245461575	0.0485128762196455	-1.84140853949167	0.0655617123400078	0.0827473464737027
BOLA2	834.373879431371	0.480985831611268	0.0461043276656787	10.4325527768042	1.76092698395412e-25	5.93654006852423e-25
BOLA3	196.567239683586	0.998949846066148	0.0478677639935741	20.8689473400147	1.02567470476723e-96	3.67002701671493e-95
BOLL	0.0293871456983614	0.0807134514700189	1.72869729194534	0.0466903325678207	0.962760035437442	0.999641322860956
BOP1	506.682063812088	-0.706975742664857	0.079241105753938	-8.92183085960689	4.58642301072013e-19	1.23477744589848e-18
BPESC1	0.00728621059860311	-0.0843559096116126	3.39376039627614	-0.024856177149151	0.980169681992518	0.999641322860956
BPGM	743.038295250804	0.486507561551258	0.0390237030597204	12.466975796908	1.13035000743567e-35	5.34261521158734e-35
BPHL	343.448586218992	0.405190611179587	0.0415147451644772	9.76016134928114	1.66889491771182e-22	5.07400367389594e-22
BPI	3.0381023282157	0.182859795240226	0.218150004966654	0.83822961758895	0.401901755953006	0.465655415761087
BPIL1	16.2146105908353	-0.488347388498444	0.263682679591118	-1.8520267969656	0.0640219750356339	0.0808915553018912
BPIL2	0.260779282804353	1.1284686131721	0.522946282737122	2.15790541098343	0.0309351867226153	0.0401932363113589
BPIL3	0.0595264558872501	-0.125597684780667	1.30744572882908	-0.0960634021062963	0.923470217726456	0.983344978834955
BPNT1	567.872171221738	0.272017753497039	0.03063149394137	8.880329311319	6.66627125478962e-19	1.78768256336167e-18
BPTF	2041.82012862986	-0.878259403464669	0.044911848302593	-19.5551828004808	3.72667295922993e-85	9.28063292346922e-84
BPY2	0	NA	NA	NA	NA	NA
BRAF	114.788837401683	-0.178333390469612	0.0659630748075447	-2.70353362074042	0.00686065070683561	0.00934698824478367
BRAP	686.150576257255	-0.290515480521754	0.0249275075077197	-11.6544135201558	2.17875315756956e-31	8.99404911339056e-31
BRCA1	262.200479127068	0.621208186093238	0.0668580991929004	9.29144252667002	1.52211214944534e-20	4.32771502272734e-20
BRCA2	55.6149335591311	0.783648738638909	0.114651280127769	6.83506313898634	8.19689188033319e-12	1.69858862370735e-11
BRCC3	326.702697783136	0.158732162795529	0.0295416486893998	5.37316533902473	7.73663269056638e-08	1.36907043228975e-07
BRD1	768.809018292719	-0.640915716055649	0.0371185818818803	-17.2667080357538	8.37876022188146e-67	1.14863183871616e-65
BRD2	4700.4127093888	-0.264039916599918	0.0278181867621256	-9.49162930200063	2.27450943704676e-21	6.64322978791481e-21
BRD3	1541.48054589345	-0.882856829305041	0.0470992955022532	-18.7445867266275	2.1433049487684e-78	4.33538102035061e-77
BRD4	1670.41358902439	-0.0266062384025695	0.0361597682012751	-0.73579670794547	0.461854424982527	0.530037646409346
BRD7	1404.71645564946	-0.853229739746194	0.028296392013555	-30.1533050339939	9.70783837383593e-200	5.49824228812999e-197
BRD7P3	0.62162749811969	-0.0087667340498959	0.201674662605092	-0.0434696849701066	0.965327129563861	0.999641322860956
BRD8	1530.85133075723	-0.26635756758227	0.0318982782836114	-8.35021768930763	6.81372668992927e-17	1.69322432210691e-16
BRD9	923.509428729664	-0.462480826760278	0.0309238004508517	-14.9554977078356	1.43405551008759e-50	1.13030943842808e-49
BRDT	0.0528890283911585	-0.0469885690723934	1.19405134424329	-0.0393522182265719	0.968609574706185	0.999641322860956
BRE	593.699401767275	0.24433819300655	0.0281726125559179	8.67289792601166	4.21259554036772e-18	1.09660251341706e-17
BREA2	6.36866293773124	-1.06354970690809	0.098460785514583	-10.8017593131081	3.37670616886211e-27	1.20976769176493e-26
BRF1	1125.15863214529	-0.576094758680347	0.039620557025452	-14.5402993277017	6.72977382361201e-48	4.84401984406176e-47
BRF2	378.354160888259	0.266858541171895	0.0313918946142794	8.50087401384523	1.88168505377876e-17	4.7809078212069e-17
BRI3	1188.38234556407	0.910345707668758	0.0490249347951294	18.5690345427894	5.72226138867737e-77	1.10450231263633e-75
BRI3BP	69.5125254342519	0.0758372350278906	0.0607480125429449	1.24839038930333	0.211888126839204	0.254175996268293
BRIP1	45.5842701277607	1.28810584269923	0.142909649384661	9.0134280522382	1.99713966805011e-19	5.45081917110799e-19
BRIX1	463.014409246011	0.364263501897173	0.0327337713638374	11.1280639755306	9.16034427103461e-29	3.45022809205243e-28
BRMS1	745.804309170691	0.037912995135568	0.0436821702710721	0.867928376733501	0.385433543266594	0.44806762421849
BRMS1L	437.080725344777	-0.35213622411567	0.0420676467159647	-8.37071363875542	5.72703297518566e-17	1.42819190674431e-16
BRP44	838.68305698964	0.509830559458216	0.0366897264902621	13.8957307188848	6.72338324083669e-44	4.24856952448536e-43
BRP44L	1360.25271523027	-0.0853243997377239	0.0519988295428191	-1.64089077557914	0.100820090182536	0.125128765820712
BRPF1	557.925607290565	-0.198835494275503	0.0306005371053409	-6.49777791778692	8.15150148112207e-11	1.62939612645238e-10
BRPF3	1078.54533573927	-0.592131698062358	0.0545652973490016	-10.8518000786299	1.95535962039303e-27	7.05645253141289e-27
BRS3	0.243823908871981	0.860095613081657	0.434199794263686	1.98087522022023	0.0476052686157028	0.0608589732857653
BRSK1	1283.52116722599	-0.766436710149388	0.0761591100291248	-10.0636248225102	7.99974650928452e-24	2.55237365288181e-23
BRSK2	783.230931723981	-1.25584295732166	0.0898760608469624	-13.9730529518874	2.27654717549328e-44	1.45621150886748e-43
BRWD1	1583.11639749308	-0.736702449636857	0.035046082522554	-21.0209643021513	4.21777203387817e-98	1.55118543650403e-96
BRWD3	173.512109257845	-0.983892338725185	0.0851876666870515	-11.5497040474139	7.40750732105661e-31	3.00284289622301e-30
BSCL2	2329.64964341578	-0.235657245989026	0.0811567064102445	-2.90373102128845	0.00368744808909234	0.00510306363237067
BSDC1	2319.13428725926	-0.260060211502944	0.0281634372090649	-9.23396564036008	2.60793487162039e-20	7.34542383633574e-20
BSG	11756.4206377976	0.268584553574918	0.0415244184042082	6.46811114752902	9.92354979918543e-11	1.97623596211827e-10
BSN	1480.83441789479	-1.92518873303519	0.11334967317007	-16.9845106667986	1.06941795270681e-64	1.36591959255845e-63
BSND	0.0909897147954666	0.758379796906218	1.07564421444893	0.705047065487866	0.480780946942633	0.549880031804974
BSPH1	0.00441372394196525	-0.0734471880676574	3.39376039627614	-0.0216418307398037	0.982733665231247	0.999641322860956
BSPRY	24.3237335337879	-1.35295168647849	0.130061465075953	-10.4024023233046	2.41759978500003e-25	8.1172223133563e-25
BST1	49.1507054963711	1.69999329008423	0.0966579209680807	17.5877286937055	3.05894854687764e-69	4.55578790719425e-68
BST2	1158.214842478	1.34791848932192	0.107761690898307	12.5083271994491	6.72250126604705e-36	3.21418578381212e-35
BSX	0.00136415215839719	-0.0395972480769345	3.39376039627614	-0.0116676616653265	0.990690764114807	0.999641322860956
BTAF1	772.18065553187	-0.978278499828138	0.0569658761405538	-17.1730615959351	4.22533261176374e-66	5.64792773856997e-65
BTBD1	2187.11130830496	-0.0533498715236921	0.0293076999841646	-1.82033634684803	0.0687077994668653	0.0865307947161163
BTBD10	674.308752919966	0.230383844653189	0.0412303290590035	5.58772752755606	2.30060230635418e-08	4.1572324082825e-08
BTBD11	262.4241342494	-0.0578397287899211	0.131330092142858	-0.440414895369177	0.65963663858506	0.734564186656461
BTBD12	350.739532772321	-0.371887566204751	0.0426086808498036	-8.72797652468195	2.59269450595022e-18	6.80367794432767e-18
BTBD16	5.17057821917797	-1.37365273738132	0.189530097705599	-7.24767598397509	4.23983384188692e-13	9.23179110805409e-13
BTBD17	633.739588852196	-1.42303012816727	0.123215544566788	-11.5491120310386	7.4587060369594e-31	3.02297954959408e-30
BTBD18	3.68419066251049	-0.526462975786768	0.0735828550973442	-7.1546962276783	8.38584116798917e-13	1.80276032396757e-12
BTBD19	18.3853988877481	0.76847582499794	0.0966713637923335	7.94936364659917	1.87471996743775e-15	4.43573333904494e-15
BTBD2	3017.38399347994	-0.0767196869564219	0.037651190706689	-2.03764304704425	0.0415856437152276	0.0535119906112922
BTBD3	1633.63974260644	-0.0834220478048273	0.0539132076092428	-1.54733972442266	0.12178134752019	0.149923714562957
BTBD6	927.879581004784	0.334885955927065	0.0523621401301444	6.39557426596234	1.59945077943879e-10	3.16300007988978e-10
BTBD7	630.485908291446	-0.273435826862561	0.0411411645938761	-6.64628309776291	3.0058686446371e-11	6.10192873964581e-11
BTBD8	11.6364923195958	-2.78638243456195	0.138515280893128	-20.1160652932711	5.33799792023547e-90	1.56300048408903e-88
BTBD9	723.964750124069	-0.887937424040924	0.0512325176826304	-17.3315203742557	2.72040827368152e-67	3.77373360456185e-66
BTC	7.38412784102394	0.0980933181870361	0.206042028574222	0.476084024535316	0.634014517843841	0.708452835173344
BTD	353.523031762761	0.025843960217418	0.044325814714992	0.583045351418593	0.559862770755664	0.632481888909188
BTF3	5615.09163187019	-0.0877881373448251	0.0396448632066254	-2.21436348228222	0.0268037848582898	0.0349997646562071
BTF3L1	0.0059867582480772	-0.0789015488396346	3.39376039627614	-0.0232490039444773	0.981451649660966	0.999641322860956
BTF3L4	1214.10511504444	0.331412214003777	0.0397306741351253	8.3414696885493	7.33728367469418e-17	1.82059049046768e-16
BTG1	2179.42585704181	0.531741257404948	0.0447584396575117	11.8802456357682	1.4992614480029e-32	6.42452652048453e-32
BTG2	3473.19355654708	-0.16650504816328	0.0743646549039583	-2.2390347723434	0.0251536537455233	0.0328862206963137
BTG3	642.501951815153	1.10136173856379	0.0542712632271842	20.2936447960201	1.46333953364301e-91	4.51131875200706e-90
BTG4	0.189368026465345	0.260737871456937	0.607542628657227	0.429168027325444	0.66780094894228	0.742737934740662
BTK	194.242499672285	0.634519885643355	0.0939349351001307	6.75488714573533	1.42946477948116e-11	2.93914327597293e-11
BTLA	2.94826635475478	0.194066943492436	0.151958700107012	1.27710320867296	0.201565812214481	0.242497972660536
BTN1A1	1.4795840875426	1.64992155229035	0.301601724223332	5.47053090143678	4.48689462581114e-08	8.00789701696715e-08
BTN2A1	546.651576952028	-0.00260909440074809	0.0302291238400557	-0.0863106193402423	0.931219496967192	0.989364566855003
BTN2A2	253.81769648445	0.558598159037159	0.0687006375547808	8.1309021126877	4.26107338544429e-16	1.02958627157072e-15
BTN2A3	14.0821060864015	0.799278979515942	0.0892175787649977	8.95876116097335	3.28346494535002e-19	8.88211321119998e-19
BTN3A1	654.44687710451	0.294083572343056	0.0621353724001318	4.7329493810587	2.21280687480857e-06	3.66851807972989e-06
BTN3A2	1008.25862309185	0.380811761849085	0.0850534623606671	4.47732227800748	7.55851035971028e-06	1.22072959801643e-05
BTN3A3	578.054592354783	0.0710718258807752	0.0708496375294151	1.00313605487774	0.315795220660627	0.371249475694201
BTNL2	0.603389911040974	0.4869616320733	0.31335516982654	1.55402456689277	0.120178556736146	0.148014882272794
BTNL3	0.737318085193933	0.736380915986719	0.266811735465831	2.75992701258458	0.00578142764221327	0.00791363348650695
BTNL8	2.29875573601498	0.468588988924792	0.164826486577874	2.84292287394843	0.00447018863518201	0.00615792559521981
BTNL9	160.986802849118	-1.2424089184232	0.097299568363672	-12.7689047270951	2.44571683227013e-37	1.23080590926861e-36
BTRC	1015.63510772102	-1.02155077650533	0.0469416925974855	-21.7621206219576	5.30380802369547e-105	2.43373579753971e-103
BUB1	201.937706427114	1.78149837683258	0.135032929163149	13.193066223722	9.61916822105708e-40	5.25436130190175e-39
BUB1B	168.481265125246	1.37123401154668	0.142149242208887	9.64643912439339	5.08922707858907e-22	1.51636477346868e-21
BUB3	1428.4362258866	-0.131767937770114	0.0369447204003981	-3.56662430631614	0.000361609319055231	0.00053204049073197
BUD13	408.466360709844	0.058670506622502	0.0322619058271679	1.81856914891541	0.0689771881564439	0.0868479929385916
BUD31	1430.59039810766	0.764404584426812	0.0462088735594371	16.5423765079142	1.81710066856771e-61	2.06184238998384e-60
BVES	227.219288436926	0.274901508177977	0.104681418075537	2.62607741881763	0.00863751692230825	0.0116898680925047
BYSL	397.23122337608	0.175715090720057	0.0431899525376411	4.06842518678197	4.7331953031845e-05	7.30733103543819e-05
BZRAP1	1629.93698729099	-2.15712931558787	0.0894301075355424	-24.1208400060411	1.51112078700278e-128	1.51287612933112e-126
BZW1	3385.04437236427	0.774255265565523	0.0300221869372194	25.7894358990103	1.1649373964847e-146	2.04358885048816e-144
BZW2	922.22915353867	0.758786824909458	0.0605090456774129	12.5400560596298	4.50676627381837e-36	2.16838902538596e-35
C10orf10	1220.12079716413	1.44614013316539	0.109720400373538	13.180230187295	1.1404233189601e-39	6.2106075416885e-39
C10orf105	171.278174808552	-0.148437903994461	0.173487622003955	-0.855610920709245	0.392213027328294	0.455387971693831
C10orf107	69.0443061939099	0.277024643354783	0.122548927559112	2.26052278769359	0.0237888237740938	0.0311573078079855
C10orf108	2.78721421207161	0.756621629201781	0.122259413454478	6.18865744422619	6.06787829388199e-10	1.1709847295524e-09
C10orf11	29.572076867849	0.956723197065159	0.108110094342411	8.84952698343771	8.78910117262926e-19	2.34711508211006e-18
C10orf110	36.3371945846217	-0.249974569271234	0.0937304439470409	-2.66695172608457	0.00765426653775693	0.0103932136158611
C10orf111	9.29176719469628	-0.472774375387641	0.0742490948517909	-6.36740927726257	1.92247690542743e-10	3.78819678889541e-10
C10orf113	0.00301902318083856	-0.0679928272956796	3.39376039627614	-0.02003465753513	0.984015725393577	0.999641322860956
C10orf114	55.6067770197778	0.644520651672913	0.0996333311486901	6.46892605358188	9.87018790428761e-11	1.96580663947245e-10
C10orf116	360.667633824635	-0.816566362466469	0.11163787585995	-7.31442045252505	2.5849458191031e-13	5.66892144839924e-13
C10orf118	195.188405570169	-1.04086244849627	0.0618344745304094	-16.8330442912455	1.3972932828689e-63	1.70347753667344e-62
C10orf119	1044.08414826962	-0.0616872996121183	0.0323256862422086	-1.90830595675248	0.0563516835632622	0.0715742566332124
C10orf12	46.1367513715248	-0.812482651974155	0.067125634100834	-12.103910270012	1.00697748285013e-33	4.48468089025793e-33
C10orf120	0.32552550238144	-1.24392209891585	0.569759085642791	-2.18324223388642	0.0290179760722932	0.0377815001432557
C10orf122	0.0127179664562609	0.077351618559843	2.95547587456843	0.0261723058629732	0.979119905033162	0.999641322860956
C10orf125	61.388957984019	0.720151424396922	0.0941256676608795	7.65095687811234	1.99489236396645e-14	4.54955721708548e-14
C10orf128	14.1897645148527	-0.104910432840135	0.11127481429608	-0.942804834173785	0.345780738614732	0.404342353796593
C10orf129	0.00729977352102043	-0.0614146911648452	3.39376039627614	-0.0180963544840212	0.985561986176776	0.999641322860956
C10orf131	1.00145480912512	-1.2191922178373	0.166664616699243	-7.31524328308634	2.56915499952942e-13	5.63553829320257e-13
C10orf137	314.691187304351	-0.634045458219245	0.0419386500314306	-15.1184040913111	1.2247493258668e-51	1.00157615043967e-50
C10orf140	37.1616833704602	0.72967867807526	0.114746904126897	6.35902714436915	2.03035529689791e-10	3.99560538572493e-10
C10orf18	1217.46994433601	-0.906648138460105	0.046852265802734	-19.3512122183683	1.99103836453604e-83	4.67634520144526e-82
C10orf2	406.343950046262	-0.91892772244764	0.0501518401155459	-18.322911389303	5.43272437842439e-75	9.94394232257679e-74
C10orf25	110.227788526593	-0.344302610660276	0.053957246587271	-6.38102632059619	1.75905068092147e-10	3.46961807441853e-10
C10orf26	1583.99919336179	-0.365377449409885	0.0357525381566262	-10.2196226687242	1.61970123075144e-24	5.28602856390943e-24
C10orf27	0.0173417577421913	-0.0537245911887211	2.31232123758114	-0.0232340517033529	0.981463576601594	0.999641322860956
C10orf28	222.714905243196	-0.474660847609492	0.0308331773869193	-15.3944837294279	1.78241415084693e-53	1.55719681411365e-52
C10orf32	788.853874251158	-0.7826790085671	0.0460506641652794	-16.9960417022001	8.78556546061727e-65	1.12576770604923e-63
C10orf35	157.789253857804	-0.069010808781842	0.12005958982718	-0.574804635607868	0.565423431290641	0.63829092702018
C10orf4	508.435309686759	-1.44101735737383	0.0500406599536225	-28.7969295111087	2.34351021041433e-182	1.03234228668985e-179
C10orf40	0	NA	NA	NA	NA	NA
C10orf41	42.4548405193191	0.850105191748367	0.0624527077756106	13.6119829231865	3.398949434451e-42	2.04732223151389e-41
C10orf46	890.096366805415	-0.371266970170627	0.0332934881536979	-11.1513389181899	7.05368992183885e-29	2.66842166642388e-28
C10orf47	15.4010550888129	0.406089874393654	0.0929890612423184	4.36707144870978	1.25923544372853e-05	2.00770724692598e-05
C10orf50	0.667902915917763	-0.72751926770977	0.24494468447621	-2.97013698935945	0.00297666977672709	0.00413993720508392
C10orf53	0.215792584612606	-0.555210702024425	0.478708511121492	-1.1598095482441	0.246126355724891	0.293030795767839
C10orf54	1948.02289228819	-0.365315711576385	0.0751471739410625	-4.86133666001732	1.16595765690343e-06	1.95738301429512e-06
C10orf55	6.36114101839576	1.58626105125209	0.157572138244813	10.0668878960543	7.73881129683253e-24	2.47071116664699e-23
C10orf57	497.16351254955	-0.397874650163954	0.0342905729801407	-11.6030330083543	3.97727887244061e-31	1.6242603850101e-30
C10orf58	2749.76938049633	-0.991007562593112	0.0781548428102977	-12.6800531733977	7.62801028227422e-37	3.76050852587719e-36
C10orf62	1.5076303559431	-0.804078950525465	0.18404976763076	-4.36881263625719	1.24923884476208e-05	1.99240981733999e-05
C10orf67	1.93573736073071	0.447008853090751	0.204375855078225	2.18719013026102	0.0287286470950013	0.0374195394811887
C10orf68	4.89020097930609	-1.25618932281149	0.108953436638598	-11.529597978431	9.35796748546719e-31	3.777295651892e-30
C10orf71	0.0145575254792045	-0.0657452765779653	3.39376039627614	-0.0193723978422594	0.984544029606645	0.999641322860956
C10orf72	481.840016827344	-0.408687635860823	0.0603392796913116	-6.77316066667714	1.25998890181713e-11	2.59552738238813e-11
C10orf75	375.494923800227	-1.55098140440141	0.0771000020579015	-20.1164897925247	5.29249784749252e-90	1.55197018980539e-88
C10orf76	618.020957406031	-0.335195739811216	0.0274208227088549	-12.224131397158	2.3103798030593e-34	1.04802422965777e-33
C10orf78	133.305759023898	-0.308733248253629	0.0483403461995259	-6.38665778228657	1.69550484498202e-10	3.34794227931852e-10
C10orf79	50.2968756532573	-0.133734189366949	0.145292194404309	-0.920449924479783	0.357337689684933	0.417118420835262
C10orf81	23.4196351622034	0.823909707627478	0.276713170480871	2.9774864210319	0.00290622518015581	0.0040448010774576
C10orf82	3.88306933987306	-1.60030195470844	0.222160233416863	-7.20336817303221	5.87430741177186e-13	1.27013957050124e-12
C10orf84	569.030651607994	-0.158120564229731	0.0376755187901459	-4.19690476222687	2.70587651304194e-05	4.23618623582612e-05
C10orf88	177.373638161737	-0.412851812666085	0.0364861674178062	-11.315296779146	1.10228672438865e-29	4.29369812095817e-29
C10orf90	132.459095135176	-0.667122589743772	0.109611178592531	-6.08626417770521	1.15575682639907e-09	2.20272738868462e-09
C10orf91	0.0248364464709901	-0.0121736839351837	2.13471071347487	-0.00570273239289057	0.995449902531741	0.999641322860956
C10orf93	15.7489249194732	0.379115621247608	0.0941929078658091	4.02488499227257	5.70031668524281e-05	8.76356271533801e-05
C10orf95	3.47947741879051	-0.350674896251096	0.102654406393783	-3.41607251524989	0.000635313265249926	0.000921678487781709
C10orf96	0	NA	NA	NA	NA	NA
C10orf99	0.0732185332749518	-0.289396072872896	1.15967050729344	-0.249550256777952	0.802935170905328	0.874345412703599
C11orf1	254.785988597289	-0.0880248488776681	0.0510896041250833	-1.72295030241683	0.0848975126137905	0.106171433508496
C11orf10	1010.08224574455	0.716905855008522	0.0428724171104897	16.7218436310911	9.08642526782144e-63	1.0818030515557e-61
C11orf16	0.152458142158543	0.638547326358519	0.435342300317257	1.46677069031237	0.142438445395761	0.174218381136556
C11orf17	458.844875971609	0.269345726902393	0.0367636418958854	7.32641580138279	2.36389595103351e-13	5.19621972026361e-13
C11orf2	2964.90990989529	-0.821164310237794	0.0481250852815637	-17.0631242611507	2.79214357785197e-65	3.64135935156313e-64
C11orf20	17.87207985637	-1.90364175055544	0.129564341966888	-14.6926362736588	7.18626491002921e-49	5.33133717483192e-48
C11orf21	6.18320450788212	0.882553793298719	0.139920453327389	6.30753955058805	2.83506146884841e-10	5.53579821680279e-10
C11orf24	556.555227763496	0.548371174082019	0.0440656014410866	12.4444273117471	1.49956070766241e-35	7.05405598196296e-35
C11orf30	413.677821655989	-0.346731835620871	0.0462053627106103	-7.5041470357563	6.18298721490624e-14	1.38523231872837e-13
C11orf31	921.342454327417	0.716418111728937	0.0516083708649967	13.881819939696	8.16442770082823e-44	5.14933026769068e-43
C11orf34	0.0878284101574495	0.132377326749453	0.644847798316692	0.205284606840575	0.837349769918564	0.906987841598585
C11orf35	5.75015563450014	1.01343887346478	0.138263801600969	7.32974836312957	2.30585278110558e-13	5.07200617841277e-13
C11orf36	0.0127399615367058	-0.0144136634700275	2.95506757960842	-0.00487760874556291	0.996108246719778	0.999641322860956
C11orf40	0	NA	NA	NA	NA	NA
C11orf41	1241.80364441094	-1.46461073382009	0.0897615654529711	-16.3166799334337	7.51110692899014e-60	8.10520809218135e-59
C11orf42	1.44572584387256	-2.01354072404522	0.193395989076185	-10.4114916429421	2.19751064998345e-25	7.38952563437184e-25
C11orf45	35.231816052633	0.356078524339388	0.0897196950877406	3.96878883717967	7.22388594022984e-05	0.000110356882701276
C11orf46	650.293623780151	-0.0897040893843786	0.0329102698275394	-2.72571722609561	0.00641619409389734	0.00876314010771166
C11orf48	628.446743555506	-0.0894128887189318	0.0484666537326753	-1.84483313438764	0.0650618158414591	0.0821373312587724
C11orf49	1297.53346266826	-0.110352121176041	0.0418042802617932	-2.63973259400656	0.00829714659846366	0.0112391920883795
C11orf51	469.525311790961	0.24185456076335	0.0539164450411541	4.48572899379297	7.26650555007556e-06	1.17481395905022e-05
C11orf52	15.6322944608071	-0.62312958677513	0.115967769447885	-5.3732997516621	7.73086521432396e-08	1.36817195914243e-07
C11orf53	0.0825085425372471	-0.230357202075635	0.930741144942503	-0.247498677078325	0.804522315197997	0.875688878441132
C11orf54	529.315751689585	0.000205655072810468	0.0359466748237897	0.0057211153415048	0.995435235300129	0.999641322860956
C11orf57	1059.37954798202	0.000419253946989037	0.0263901425774811	0.0158867632396495	0.987324730075833	0.999641322860956
C11orf58	3081.06505763591	0.342251030522462	0.0298713137941527	11.457515155877	2.15612166631723e-30	8.60148919126713e-30
C11orf59	2398.4669100953	0.280914272738601	0.0409032175169334	6.86777935311094	6.52089740352585e-12	1.35581864097014e-11
C11orf61	236.853487161636	0.196846894682381	0.0450703940634258	4.36754323481987	1.25651928671519e-05	2.0035377912287e-05
C11orf63	47.9504266494229	1.3596324862014	0.165241561544502	8.22815079628276	1.90125642825152e-16	4.64603133348494e-16
C11orf64	0	NA	NA	NA	NA	NA
C11orf65	6.71777176457098	-0.543331496292751	0.083554341422811	-6.50273207879557	7.88742013956534e-11	1.57724532862508e-10
C11orf66	52.3380958828469	-0.441810274725108	0.0858146390969974	-5.14842548280981	2.6268210129788e-07	4.54217314552327e-07
C11orf67	236.883125668854	-0.188160657240584	0.0562076155954084	-3.34760076988491	0.00081514346385343	0.00117388949393146
C11orf68	1294.07479603726	-0.327074540987259	0.0354330629256458	-9.23077244757548	2.68687174819278e-20	7.56453041676261e-20
C11orf70	47.0484272408033	0.787917636305062	0.147958909536212	5.32524630503729	1.00816335057201e-07	1.77627074023544e-07
C11orf71	396.017686499723	-0.429963841076362	0.0499439988154978	-8.60891901476946	7.37527278895281e-18	1.90092357944886e-17
C11orf73	629.111294063839	0.092050099425238	0.0375842536089505	2.44916662129262	0.0143187193019465	0.0190675784443426
C11orf74	215.182831897033	-0.254271615342852	0.0387169296698806	-6.56745298531923	5.11831643629216e-11	1.02932318876554e-10
C11orf75	116.718342258699	0.362972265575734	0.0699681098861787	5.18768144753664	2.12928424190178e-07	3.69442464133208e-07
C11orf80	96.8965167247578	0.446003614672709	0.0595536585245791	7.48910521573807	6.93447350196189e-14	1.55079048092724e-13
C11orf82	86.1132916057665	1.50962419971454	0.0997773901607164	15.1299226937377	1.028161114962e-51	8.44643090836789e-51
C11orf83	348.357660717766	0.165247382287231	0.0626284306904888	2.63853621215399	0.00832648070728679	0.0112773863801958
C11orf84	422.225548808144	0.232794406827342	0.0383168535062475	6.07550948277591	1.23594675578682e-09	2.35216710253093e-09
C11orf85	0.0182683976163151	0.0325856320798917	2.16747661313226	0.0150339025032439	0.988005133148833	0.999641322860956
C11orf86	1.24243040952803	0.539858878763137	0.302763481267304	1.78310434436611	0.0745693193925361	0.0936569485090441
C11orf87	216.414530279351	-1.37995087964891	0.189768551305871	-7.27175746535939	3.54840274161155e-13	7.75181700980447e-13
C11orf88	8.66675091854451	1.8159076472331	0.359035372192569	5.0577402336256	4.24253801402491e-07	7.27381344508007e-07
C11orf9	1883.57413958335	-0.953890991566071	0.142653581674508	-6.68676510164715	2.28157652138695e-11	4.65114061944195e-11
C11orf90	2.31398853157431	-1.14406657920632	0.22325986350085	-5.12437193710801	2.98531169609085e-07	5.15127382935314e-07
C11orf92	84.1096483538168	-1.10913612875707	0.14489487222825	-7.65476453169354	1.93666768037499e-14	4.41829478974259e-14
C11orf93	79.5432390738976	-0.491813070646417	0.122112946402835	-4.02752603334937	5.63668278799964e-05	8.66842225806958e-05
C11orf94	0.0158327880046574	-0.0712115322113299	2.32416713653954	-0.0306395917452636	0.975556967314014	0.999641322860956
C11orf95	829.837419446718	-0.3468568973649	0.0512239776676249	-6.77137764692029	1.27561815350414e-11	2.62697203522295e-11
C12orf10	827.052427060885	0.0795811700970092	0.039388820595346	2.02039992297744	0.0433419214157257	0.0556779799250814
C12orf11	451.478863310276	0.0639263898092024	0.0374380005871963	1.70752681250465	0.0877241785648734	0.109533660348418
C12orf12	0.0150149151460978	0.135271328670964	3.39376039627614	0.0398588329392353	0.968205671558015	0.999641322860956
C12orf23	1265.09928104141	0.27023286129471	0.0363222682279684	7.43986745537627	1.00786373140456e-13	2.24179564044352e-13
C12orf24	358.337936112238	-0.0457900712722185	0.046736122883518	-0.979757593207776	0.327205789461866	0.383844263492873
C12orf26	53.7551253917626	0.469839869399918	0.0460042882623443	10.2129581207866	1.73493347309502e-24	5.65930331366837e-24
C12orf27	0.0405867109581421	0.134297614702368	1.51259260948255	0.0887863750361112	0.929251686069734	0.988068238639722
C12orf29	585.614234330496	0.271497806905404	0.0410300639541888	6.61704566701476	3.66448320349699e-11	7.41840793943227e-11
C12orf32	626.029490195694	0.402277137006362	0.0420509000650794	9.56643345050367	1.10657232274405e-21	3.26519546796e-21
C12orf34	1215.26389078874	-1.80176916164762	0.0915145928575486	-19.6883262590946	2.71513579833323e-86	7.01722776145496e-85
C12orf35	426.532392750835	-0.304449557611315	0.0467563719260818	-6.51140251199615	7.44523417608731e-11	1.49032492247378e-10
C12orf36	0.0271540078452724	-0.0689630242314412	2.41020638285019	-0.0286129124551936	0.977173313651519	0.999641322860956
C12orf39	41.9888745324076	-2.35461904212734	0.176403484043224	-13.3479168787301	1.21807711059291e-40	6.91068762543884e-40
C12orf4	487.037490946679	0.293844606318296	0.0439148078525031	6.69124199074794	2.21284379947104e-11	4.51334526565638e-11
C12orf40	0.128068327916779	-0.175483315767039	0.677815434701181	-0.258895426074801	0.795715927368025	0.867627988350734
C12orf41	638.574938019898	0.746932992888841	0.037251593275974	20.0510347934725	1.97690206604031e-89	5.67121992114574e-88
C12orf42	0.792859496262166	-0.191487038203289	0.215754015486546	-0.887524794249915	0.374796423338083	0.436367291191755
C12orf43	369.281352311894	-0.138133658666642	0.0332852387930105	-4.1499975267009	3.32478867124447e-05	5.17813370758008e-05
C12orf44	727.648603547328	0.232580126433535	0.0414380738761849	5.61271566647798	1.99175732197678e-08	3.60835362763168e-08
C12orf45	95.272987123227	0.511843327001255	0.0525191386539848	9.74584389842083	1.92175429358125e-22	5.82580445965151e-22
C12orf47	427.525989724071	0.176469799452983	0.0438242538248087	4.02676107523557	5.65504431735737e-05	8.69598506733187e-05
C12orf48	62.7226784703692	1.9982091057035	0.0873131193871507	22.8855539663329	6.47133935611362e-116	4.40829416000825e-114
C12orf49	665.576831154786	0.182763583408174	0.0482296239240225	3.78944657947338	0.000150983274606626	0.000226772348274523
C12orf5	447.081414340713	0.657810459932784	0.0569462249827763	11.5514322526514	7.26003593717264e-31	2.94366317002604e-30
C12orf50	0.289028811670245	1.45415771767625	0.370195691061554	3.92807845360485	8.56272803669615e-05	0.000130357851064763
C12orf51	2162.22067680786	-1.3123989042345	0.0537530545721859	-24.4153362944623	1.17544947168545e-131	1.25950999336328e-129
C12orf52	420.323766175563	0.25869482468774	0.0362650817861174	7.13344109392773	9.7890213758962e-13	2.09600098006471e-12
C12orf53	1730.25429527773	-1.11881898408327	0.074696171140255	-14.9782641734405	1.01842328827928e-50	8.06882687592336e-50
C12orf54	0.690756709587375	-1.11091393770101	0.219627959440488	-5.0581626334421	4.23315346000799e-07	7.25897932852408e-07
C12orf56	0.345156369726413	0.596359383275792	0.427984382257005	1.39341389078463	0.163494667588503	0.198587916397481
C12orf57	1783.13370977922	0.545303732293752	0.0655334715052927	8.32099566478347	8.72274403636438e-17	2.15788038228942e-16
C12orf59	52.1343545884454	0.509003407706202	0.106292372465438	4.78871057160482	1.67856369042346e-06	2.79802960269628e-06
C12orf60	24.5679789708252	0.801980880946119	0.0610803347106107	13.1299359236616	2.2184415993967e-39	1.19728199904277e-38
C12orf61	9.53245105064364	0.665279421453497	0.0749090242438142	8.88116522901357	6.6163590019325e-19	1.77477786867805e-18
C12orf62	543.979230858937	0.563156995219851	0.0531694554183093	10.5917390123564	3.25488069663259e-26	1.1248518139705e-25
C12orf63	13.5520274977732	-0.0977253023656518	0.196142265651858	-0.498236838658268	0.618317120156394	0.692519366792485
C12orf65	426.043630312067	-0.208067166560723	0.0330021884833846	-6.30464754376751	2.88850447801205e-10	5.63737562938199e-10
C12orf66	95.4369682918087	0.218806491002548	0.0439667698463597	4.97663330208609	6.4699724922836e-07	1.09957360009035e-06
C12orf68	371.364689018393	-0.344009354956297	0.0908370887517258	-3.7871023794756	0.000152414311681716	0.000228852363313639
C12orf69	1.15825300282513	0.289618475657295	0.152757619992529	1.89593472110563	0.0579686770015168	0.0735291197978672
C12orf70	0.841553575866171	2.22025351272354	0.211253024579694	10.5099253236299	7.77550926561821e-26	2.65290740399913e-25
C12orf71	0.662023131431799	-0.527484684840602	0.208105117967781	-2.53470308655392	0.0112542670700359	0.0150993797718662
C12orf72	55.2890545888994	-0.022818816807982	0.0383655099794254	-0.594774233946563	0.55199439290304	0.62419765262504
C12orf73	154.245068957948	0.220672740227594	0.0399449873785094	5.52441632129084	3.30582743745113e-08	5.93689230771822e-08
C12orf74	0.0241406397914647	0.217239725349952	1.91639379211151	0.113358604188858	0.909746257179404	0.972102719842195
C12orf75	160.095424774151	0.54736516012318	0.079262851753189	6.90569602299425	4.99578711353272e-12	1.04265622185259e-11
C12orf76	799.955287096721	-0.359297678597471	0.0470460365028049	-7.63715086978793	2.22081216846277e-14	5.05490407801555e-14
C12orf77	0.00432639744175173	-0.0734471880676574	3.39376039627614	-0.0216418307398037	0.982733665231247	0.999641322860956
C13orf1	364.24245934141	-0.318459085345422	0.0460049163265585	-6.92228376386757	4.44419873231371e-12	9.29296956441505e-12
C13orf15	2427.23252233936	-0.891781823366017	0.0813706219978931	-10.959506041248	5.98250050674714e-28	2.19207222819313e-27
C13orf16	9.4782296878283	-0.981737976091464	0.136265087492606	-7.20461854284383	5.82065655824478e-13	1.25908855253259e-12
C13orf18	209.861396102757	1.42321408244885	0.112307761820386	12.6724463151977	8.40516426805356e-37	4.13848910297133e-36
C13orf23	785.261460755927	-0.109727478169564	0.0404580334316162	-2.71213078992162	0.00668522093794911	0.00911487273216626
C13orf26	20.2585691356033	1.38272128281191	0.217464171300569	6.35838664614216	2.03883753748975e-10	4.01189959357349e-10
C13orf27	200.616773980269	0.290444322998976	0.0655659948044186	4.42980120816229	9.43199916768464e-06	1.51503540637722e-05
C13orf28	0	NA	NA	NA	NA	NA
C13orf29	33.6591605987654	1.56666845044572	0.105973423275366	14.783597641975	1.86909801027537e-49	1.42067215711996e-48
C13orf30	2.90959731916561	0.730174410399239	0.421618298075454	1.73183757377761	0.0833024861362443	0.104229324160751
C13orf31	140.112178356963	-0.259030629124503	0.106089330693673	-2.44162751740267	0.0146212236448821	0.0194521151887582
C13orf33	29.212462387058	2.97442816602889	0.187208802022054	15.8882922912914	7.63801376683768e-57	7.45486690792828e-56
C13orf34	91.8679127898879	0.913716527109163	0.0561510445431223	16.2724760428536	1.54770662357716e-59	1.65749262016045e-58
C13orf35	0.109147277993463	-0.104576071746673	0.575309656718225	-0.18177353799902	0.855760452144995	0.924404089306863
C13orf36	60.5662211363117	-1.7257928180841	0.204593558882473	-8.43522556384812	3.30564634510334e-17	8.32060967520686e-17
C13orf37	352.190212017274	0.534528508560571	0.0533932358368539	10.0111652755764	1.36139434988699e-23	4.30619438292799e-23
C13orf38	17.4637141425767	1.07372081371062	0.0939861697120996	11.4242427050668	3.16401738832522e-30	1.25641660033595e-29
C13orf39	2.24409433252537	-0.748588654770942	0.369293856105329	-2.02708125898913	0.0426541031437092	0.0548228157049697
C14orf1	831.61581879805	-0.0472920416557145	0.0402165512590873	-1.17593478742234	0.239620936312709	0.285783395735926
C14orf101	286.717177285724	-0.239559933600557	0.0429904314503839	-5.5724012418214	2.51251925340601e-08	4.53438357249339e-08
C14orf102	287.012915502527	-0.575678492999998	0.0433247262919051	-13.2875275223045	2.7346594671699e-40	1.52744870717692e-39
C14orf104	283.484380540906	0.203566761413844	0.0366536354916139	5.55379456044458	2.79533990564545e-08	5.03425301622693e-08
C14orf105	1.52330994610027	-1.48835228752964	0.354510655187844	-4.19832878292759	2.68892043117311e-05	4.21063825793068e-05
C14orf106	199.307716003452	0.481958632633411	0.0767985463581368	6.27562181171868	3.48239712777905e-10	6.77976411942291e-10
C14orf109	288.183836234495	0.666396748374739	0.0354563310576275	18.7948591548189	8.32007412331513e-79	1.70029720975748e-77
C14orf115	0.151860731203006	-0.176442180153176	0.598123127655181	-0.294993074159967	0.767999170438579	0.841200550094152
C14orf118	231.716800130189	-0.18685274260966	0.0535149355338281	-3.4915998822711	0.0004801369080995	0.00070200279755542
C14orf119	669.760107602684	0.884582110863359	0.0370186214146857	23.8955984058454	3.40307961477454e-126	3.19712072055336e-124
C14orf126	402.861182144984	0.0686074409160523	0.0381068076761411	1.80039854031141	0.0717977311527681	0.0902788724796272
C14orf128	146.753368452714	-0.551347441588483	0.0656309475508947	-8.40072347212312	4.43736222206744e-17	1.10866941426825e-16
C14orf129	321.229354964684	0.798037239652472	0.0499129615638784	15.9885772081696	1.53496800732517e-57	1.52596142473454e-56
C14orf132	4770.23004758238	-1.50796066047984	0.0783931113179526	-19.2358822749583	1.85362073336896e-82	4.2283456614008e-81
C14orf135	1094.90976071153	-0.112791714952609	0.0364640380326067	-3.0932316067614	0.00197989551317868	0.00278587938371245
C14orf138	95.9012254299131	0.0706001397963615	0.054747892318983	1.28954991335588	0.197206975575252	0.237441319049333
C14orf139	130.287783510669	-0.409201937411764	0.0715807801050626	-5.7166454013376	1.08647507270931e-08	1.98939547074789e-08
C14orf142	187.116757286188	1.10146144789925	0.0471734249038751	23.3491939612967	1.4043886978219e-120	1.09173322184014e-118
C14orf143	51.4409101276281	0.545053055752233	0.0437363239055241	12.4622512154797	1.19936436133889e-35	5.6580199273729e-35
C14orf145	57.6889315779722	0.115883018866176	0.0573042416040769	2.02224155878072	0.0431514028221548	0.0554440146579968
C14orf147	1178.75432700887	0.549276221967177	0.0458734459972191	11.9737292463373	4.87855148513786e-33	2.12590736623187e-32
C14orf148	10.7265197971414	0.201795878982575	0.0738455299614408	2.73267561473178	0.00628221707090071	0.00858370478332401
C14orf149	193.64515250409	0.397202865881899	0.0545997664102036	7.2748088865023	3.46911223998054e-13	7.57943479919918e-13
C14orf153	444.635043209842	0.444718760252152	0.044044945110691	10.0969307405087	5.69982188323543e-24	1.82709523271953e-23
C14orf156	478.437018868786	0.153070896883324	0.0464181175380291	3.29765412735485	0.000974961495251277	0.00139784910461204
C14orf159	1289.57889406383	-0.547592109684056	0.0493089369501808	-11.1053318841028	1.18177493975376e-28	4.43848515171253e-28
C14orf162	15.5414320137048	-0.958845210730817	0.169287611391754	-5.66400106214461	1.47883490118621e-08	2.69240854575811e-08
C14orf165	0	NA	NA	NA	NA	NA
C14orf166	1452.22700658135	0.320409152748695	0.0363976433192434	8.80301919380851	1.33183772109424e-18	3.53285416101314e-18
C14orf166B	0.536020402957131	0.65760148591631	0.247767321471049	2.65410903266818	0.00795181282264796	0.0107802479539974
C14orf167	510.126783551553	-0.254039410079695	0.0595005185694123	-4.26953270639712	1.95882925403135e-05	3.09352073794323e-05
C14orf169	103.499541673959	0.555454167092912	0.0751266523012191	7.39357005907607	1.42938081322134e-13	3.16411120720118e-13
C14orf174	27.5838331868082	0.327279717139761	0.0946895024034289	3.45634636187411	0.000547551248366131	0.000797334048068892
C14orf176	22.4255621323628	-0.082473237205621	0.0737900514992118	-1.11767420580404	0.263706163147555	0.312608974529002
C14orf177	0	NA	NA	NA	NA	NA
C14orf178	2.70561529480065	-0.920991012913727	0.094328713534209	-9.76363376968693	1.61270946021934e-22	4.90543802822279e-22
C14orf179	302.969133008612	0.559617641312098	0.0483065822120408	11.5847078324786	4.926434512821e-31	2.00650732171051e-30
C14orf180	1.89024689155223	0.232697763768146	0.268486586816244	0.866701634996047	0.386105509379316	0.448770644589802
C14orf181	17.5765551496714	0.596190274716232	0.101206323907335	5.89084013427965	3.84237131212173e-09	7.16194889705586e-09
C14orf182	0.358254785087366	0.901522747215348	0.268604220182072	3.35632383811489	0.000789860222689848	0.00113880276342867
C14orf183	0.012842954999004	0.00852763549926255	2.95316631026822	0.00288762453696284	0.997696012166482	0.999641322860956
C14orf184	0.160590967411872	0.301001293815022	0.48337236160332	0.622711014789129	0.533474443119385	0.604808126231699
C14orf19	5.13112486214384	1.49140805713009	0.0903169479055778	16.5130475698679	2.95572570084597e-61	3.33663727607458e-60
C14orf2	1015.60224639624	0.529294586613784	0.0521775958710722	10.1440968633672	3.52019338626863e-24	1.13575510247401e-23
C14orf21	309.767141951698	-0.821281494730981	0.0541528864775783	-15.1659781805172	5.94071996725868e-52	4.93351034398697e-51
C14orf23	60.7252350090342	0.808324025783044	0.132768275116275	6.08823173363618	1.14164548834674e-09	2.17625141989589e-09
C14orf28	76.6672466086553	-0.38527928691194	0.0392496377627093	-9.81612338032809	9.5963101413318e-23	2.94561251055467e-22
C14orf33	48.9780517924079	0.020161284873555	0.0484964196056272	0.415727285385323	0.677609572854288	0.752507258414037
C14orf34	0.321068841946992	1.88380478261722	0.377786825619921	4.98642264596186	6.15075158975636e-07	1.04594963338544e-06
C14orf37	320.128908451342	-0.39348074501065	0.0645039441263118	-6.10010365009827	1.05999707192491e-09	2.02352869383355e-09
C14orf39	1.43531205572771	0.464075290902348	0.383785999298128	1.20920328451547	0.226584756174206	0.271133020743769
C14orf4	1310.98788339346	0.317138809618291	0.048309567639556	6.56472051218726	5.21305463496613e-11	1.04805661286951e-10
C14orf43	943.513765885359	-0.358879862479706	0.0461428170709711	-7.77758891330198	7.39198149177922e-15	1.71401624881904e-14
C14orf45	117.427461537914	0.448663649573073	0.0572987975788709	7.83024545943559	4.86918390017693e-15	1.13448322112373e-14
C14orf48	0.0251756404979664	0.165904592416992	2.26791330322765	0.0731529693753637	0.941684391063846	0.997382436634891
C14orf49	68.0662606383526	-1.30286270446393	0.082662153895704	-15.7612963498116	5.74425065247272e-56	5.4197182619689e-55
C14orf50	13.2150868551745	1.59803537763097	0.149188871711545	10.7114918110028	8.99012848563003e-27	3.17158421375056e-26
C14orf53	0.0272319002877548	-0.0460263230978479	1.81542203698288	-0.0253529604467846	0.979773431159459	0.999641322860956
C14orf64	55.498960037411	-0.00880751951344375	0.0739621598595053	-0.119081426639975	0.905210845424347	0.968114086260956
C14orf68	0.687922334888099	-0.529575184261737	0.247233395004268	-2.14200506469846	0.0321930744787217	0.0417755508897421
C14orf70	0.180327361278748	0.499939058544788	0.667668988226288	0.748782806092153	0.453988124585236	0.521644249574144
C14orf72	0.408941419484284	2.31133976032686	0.339314847899824	6.81178490900946	9.63951601121847e-12	1.99357460501183e-11
C14orf73	0.34178464865965	0.689032890796666	0.471094850100305	1.46262029960624	0.143571305497874	0.17550653606835
C14orf79	248.811286207644	0.242126815508404	0.0509788006028972	4.74955888810463	2.03860828776755e-06	3.3851006942885e-06
C14orf80	197.193449056907	-0.477427544182591	0.076447236854226	-6.24519032771554	4.23284369062819e-10	8.21174990010986e-10
C14orf86	22.4255067686713	1.82479326235912	0.145265105163878	12.5618142106497	3.42390768191875e-36	1.65259610369309e-35
C14orf93	226.774613355323	-0.346060427195148	0.0397399057297786	-8.70813407430487	3.08917785702299e-18	8.08299533523849e-18
C15orf17	1671.75399940604	-0.366645893513842	0.0291226187738833	-12.5897295281235	2.40496003143374e-36	1.1687551533001e-35
C15orf2	0.532754884170333	-0.817272444655524	0.35224926631706	-2.3201537172824	0.0203325632993406	0.026768440079885
C15orf21	19.8361262748425	-2.31462720823651	0.0908121849242993	-25.4880687009785	2.6732902390586e-143	3.98440845179389e-141
C15orf23	269.396533981009	0.706434652313695	0.0555662128018652	12.7133849275037	4.98298692062335e-37	2.47501252136098e-36
C15orf24	1404.56988401215	0.395995432785404	0.0372222168891572	10.6386847931338	1.96888802200116e-26	6.86289208020554e-26
C15orf26	9.2155111562467	1.72534535888757	0.281472671398532	6.12970826018376	8.80403616640334e-10	1.68571823555118e-09
C15orf27	29.3663848844609	-0.701888603758481	0.116997821529523	-5.99915959615853	1.98341347037155e-09	3.7448523881489e-09
C15orf28	4.27594318512094	-1.44148089521894	0.129491005847592	-11.1318997468869	8.77452304883566e-29	3.30742290163661e-28
C15orf29	459.384696890394	-0.00373474050616988	0.038603425268798	-0.0967463503604836	0.922927830182226	0.983031453318052
C15orf32	0.0270388988693921	-0.0230834333444393	2.01012528859432	-0.0114835793944872	0.990837630676398	0.999641322860956
C15orf33	32.0773795937386	-0.146752644233118	0.0590579254724575	-2.48489331548834	0.0129590264507008	0.0173139301295574
C15orf34	7.33637765095622	0.3804621701856	0.0765821154451625	4.96802899703174	6.76368505614465e-07	1.14850547257114e-06
C15orf37	47.0294364290807	0.348638822342213	0.0639808717212104	5.44911022565258	5.06224340949013e-08	9.0152592854481e-08
C15orf38	374.053963757764	-0.42052564408426	0.0433453969487082	-9.70173706291997	2.96408633491883e-22	8.92422287622964e-22
C15orf39	594.079622425585	-0.328413356806798	0.0652707534265669	-5.03155455645659	4.86518616721437e-07	8.32118942128477e-07
C15orf40	231.071592046642	0.134027124738126	0.0334644118039237	4.00506441061699	6.20005847427819e-05	9.5112025333243e-05
C15orf41	131.702597027658	0.295762429927669	0.0386187670254397	7.65851560545262	1.88094388301106e-14	4.29363779282915e-14
C15orf42	100.860867527195	0.440064940600189	0.0934682877786301	4.70817376736843	2.49945991053176e-06	4.12993196686431e-06
C15orf43	0.0109872340540069	-0.100718991927545	3.39376039627614	-0.0296776967631718	0.976324099490272	0.999641322860956
C15orf44	788.080423023986	0.279528402799861	0.0278023004118635	10.054146551146	8.80813049445859e-24	2.80397576347604e-23
C15orf48	14.1933793246261	4.18834243247044	0.177598818324103	23.5831661043321	5.73730829815767e-123	4.90218372389567e-121
C15orf5	0.118419900420418	0.293133931387363	0.644135374858754	0.455081249732079	0.64905078687791	0.724077536624504
C15orf50	0.431764879402409	-1.49825636795594	0.295815778806487	-5.0648291108773	4.08766871245761e-07	7.0137502715353e-07
C15orf51	7.5102410550225	0.709638730789931	0.154601376445597	4.59011909922837	4.42993166865108e-06	7.2340831590469e-06
C15orf52	688.112931145053	-0.563704176574887	0.0680673039048884	-8.28157050795724	1.21561324228219e-16	2.98897312103198e-16
C15orf53	0.0112713899508985	0.0139857021339475	3.27860940321324	0.00426574209182729	0.996596440566744	0.999641322860956
C15orf54	0.429338483889894	1.45083875190152	0.344182408755726	4.2153193045122	2.4942503355352e-05	3.91414854348594e-05
C15orf55	0.0779638155885855	0.193500155179326	0.775798368045762	0.249420678296544	0.803035391517626	0.874406512829107
C15orf56	3.32921149369093	0.653283911604838	0.136579991817984	4.78315969205392	1.72560923555087e-06	2.87524181527485e-06
C15orf57	324.153436681542	0.0767077929561092	0.0402248481808493	1.9069753255807	0.0565237827724323	0.0717698530552091
C15orf58	39.273581703925	0.181808642377585	0.0367094742920145	4.95263541317272	7.32150729518759e-07	1.24067566346815e-06
C15orf59	773.325605787724	-1.1729557555983	0.0813183649379657	-14.4242417625231	3.64250871785423e-47	2.55233122354275e-46
C15orf60	0.00291139383504686	-0.0221103904021452	3.39376039627614	-0.0065150122048705	0.994801809121519	0.999641322860956
C15orf61	102.07832735859	0.283806241932994	0.0438797142692098	6.46782338170647	9.94246065799628e-11	1.97960423486802e-10
C15orf62	29.8601625473102	-0.300169587301481	0.0738453055364678	-4.06484318970345	4.8064766497929e-05	7.41642302707595e-05
C15orf63	912.008533680764	-0.234982670231005	0.0507191405413553	-4.63301758907774	3.60373907537392e-06	5.9116947774857e-06
C16orf11	0.622801750791956	-1.02085527145565	0.526887313439232	-1.93752107028744	0.0526816803102337	0.0670847914684758
C16orf13	635.040792426732	0.163332526198448	0.0523845787102878	3.11795055376424	0.00182113354034032	0.00256813901758314
C16orf3	2.69599292011319	0.618601473761876	0.120321724525192	5.14122845398847	2.72947923886221e-07	4.7163935627585e-07
C16orf42	1220.11135644252	-0.388816299339547	0.0435547557479905	-8.92706875890323	4.37445536727406e-19	1.1794726434368e-18
C16orf45	2563.00342700629	-0.307349930869966	0.0485975271947979	-6.32439444167574	2.54227568629852e-10	4.97733638809832e-10
C16orf46	76.9939860651977	-0.279978440853778	0.0486240479005482	-5.7580241247381	8.51041948807081e-09	1.56568023677056e-08
C16orf48	425.61034175907	-0.251322987663139	0.0578054230734438	-4.34774064958966	1.37547114571221e-05	2.18898237969276e-05
C16orf5	3179.29906006993	-0.910894101367928	0.0507965616036145	-17.9321999877864	6.61112062717967e-72	1.08666869148078e-70
C16orf52	424.314953315407	-0.445465904379345	0.040181712744766	-11.0862846292527	1.4623606053951e-28	5.46950458127303e-28
C16orf53	927.346120117595	-0.301484950863569	0.0485079178739395	-6.21516989550152	5.12691471867557e-10	9.92488578792048e-10
C16orf54	22.2814123076947	0.945685947310367	0.104186901120516	9.07682191465184	1.11791310101699e-19	3.07697742314077e-19
C16orf55	195.704510016432	0.465572683856987	0.0491669315596069	9.46922390901201	2.81930536886649e-21	8.20300753369155e-21
C16orf57	871.107702855531	0.171248719257482	0.0298811492817879	5.73099507125904	9.98431681526673e-09	1.83139735568643e-08
C16orf58	1901.15271697443	0.0934645718474195	0.0258054999680837	3.62188572060285	0.000292463323260574	0.000432391143868911
C16orf59	83.9251829459961	0.464999208564799	0.0877478210663101	5.29926786687277	1.1626795283673e-07	2.04197716761097e-07
C16orf61	435.38697629197	0.3754695022077	0.0437947277599514	8.57339505032962	1.00478096533747e-17	2.57835250173264e-17
C16orf62	1587.75572832985	-0.354837882455479	0.0238361780948219	-14.886525895381	4.03181854921192e-50	3.13668520804662e-49
C16orf63	618.798815600628	0.552396834741872	0.0295535089493135	18.6914127756969	5.81525019719235e-78	1.15275704658944e-76
C16orf68	186.266905445335	0.113413193166737	0.0344820065254067	3.28905433862073	0.0010052461412808	0.00143991576404432
C16orf7	814.928267539965	-0.470450332363746	0.0431730674703798	-10.8968475007367	1.19319978085521e-27	4.33439605202362e-27
C16orf70	469.34742074686	-0.193613103198781	0.0326299893274572	-5.93359382547701	2.96374502565377e-09	5.55086145536043e-09
C16orf71	34.2358059101869	0.419024827460676	0.0974569517437933	4.29958889502578	1.71115229844629e-05	2.70906253590774e-05
C16orf72	901.70243042529	0.137307523703503	0.0245684963706665	5.58876382306574	2.28691733534206e-08	4.13325696010992e-08
C16orf73	1.50909494540722	-1.16763272948439	0.230931107907458	-5.05619507074943	4.27703856007535e-07	7.33169624493027e-07
C16orf74	27.4310699870072	0.981857322807173	0.113550055754478	8.6469118511943	5.2911810908312e-18	1.3701774364931e-17
C16orf75	95.1999846125513	1.27546097901163	0.102704863385255	12.4187008966388	2.06893766891001e-35	9.69334705998656e-35
C16orf78	0	NA	NA	NA	NA	NA
C16orf79	70.498281962065	-0.503910817514663	0.0895507119019825	-5.62710007337761	1.83264417340284e-08	3.32526365669241e-08
C16orf80	854.438606870621	0.15937414696994	0.0360331707987838	4.42298425136983	9.73468398625009e-06	1.56251530898328e-05
C16orf81	2.10440476478979	-1.08570349654052	0.18579596709115	-5.84352563480499	5.11074294056214e-09	9.48420308095518e-09
C16orf82	0.343494980869387	-0.609093731475558	0.532690128683416	-1.14342973274346	0.252860213570987	0.300560533286423
C16orf86	109.035609569537	-0.864010492501672	0.0561778113109841	-15.3799244281476	2.23208029082895e-53	1.94575759037389e-52
C16orf87	148.543229112571	-0.28710621885165	0.0437268271030092	-6.56590559784503	5.17175744591578e-11	1.03985949741747e-10
C16orf88	358.876746329077	-0.0222262903019719	0.0387321157431943	-0.573846532147609	0.56607165732359	0.638986302780338
C16orf89	223.543939636921	0.507025341277725	0.124389808052979	4.07610035913694	4.57972592365417e-05	7.07535710268854e-05
C16orf90	0.0173559669558781	-0.122545396601189	2.662253977274	-0.0460306934076473	0.963285786028701	0.999641322860956
C16orf91	232.845789226675	0.372688650510578	0.0392019386274369	9.50689337209813	1.96441388746525e-21	5.75023279551442e-21
C16orf92	2.41526884702263	-1.79648481544299	0.192407918534379	-9.33685489208179	9.92381369453782e-21	2.83907863857444e-20
C16orf93	89.8814719268494	0.59846939492108	0.0713675715003054	8.38573293640122	5.04106656497813e-17	1.25823548876305e-16
C17orf100	180.183130063276	-0.480417113739942	0.0459782285042659	-10.4487956445597	1.48397672604561e-25	5.01737517318814e-25
C17orf101	300.945140447753	0.40426762928996	0.0433397204162429	9.32787810828719	1.08011532260452e-20	3.08562127683951e-20
C17orf102	23.3115684288133	-1.53570205809168	0.138781913465152	-11.0655777813388	1.84271464628306e-28	6.87135674064506e-28
C17orf103	356.990239982863	-0.126237557976661	0.0348587505963884	-3.62140225386449	0.000293010512104349	0.000433135524343364
C17orf104	24.7472866448415	-0.172368577096628	0.0578750889241588	-2.97828617287318	0.00289865204649676	0.00403511092118717
C17orf105	0.0362727599342079	-0.198897485823141	3.39376039627614	-0.058606814447297	0.953265282870869	0.999641322860956
C17orf106	208.396923318528	0.702319694998132	0.052474186009833	13.3840988951506	7.49002341781316e-41	4.27881078418762e-40
C17orf107	26.6936075809654	-0.899263813608654	0.11185518661397	-8.03953612550981	9.01791981952084e-16	2.15635976577034e-15
C17orf108	508.329087175114	-0.132757435815248	0.06214366185431	-2.13629888960335	0.032655059341306	0.0423556396861028
C17orf28	609.342506686598	-0.863717060663488	0.0774173573641752	-11.1566332159921	6.64610543758514e-29	2.51663320132283e-28
C17orf37	838.792412687281	0.465305169309893	0.0442980862849979	10.5039564534749	8.28338545336965e-26	2.82375838077638e-25
C17orf39	369.186957102203	-0.401636927316028	0.0259868184861137	-15.4554097313084	6.93690808255103e-54	6.12518168910508e-53
C17orf42	146.910189521728	0.869136471405564	0.0383851795673978	22.6425011215464	1.65388292769825e-113	1.02133711139447e-111
C17orf44	30.3357509913967	0.967249522619066	0.0636475085205955	15.1969738502188	3.70338024866741e-52	3.10148317149701e-51
C17orf46	0.462255368328658	0.304530795567092	0.233167005580973	1.30606298609147	0.191531138891519	0.230789725016509
C17orf47	1.86587178986466	0.166749608526838	0.0900700012145554	1.85133347705441	0.0641215928050099	0.08100709541608
C17orf48	126.60444444265	0.231409747743189	0.0412100074265111	5.61537748217729	1.96133588830569e-08	3.55454025542912e-08
C17orf49	988.682753598083	0.22202141626654	0.0439901384561167	5.04707245893353	4.48631239673185e-07	7.68578088673541e-07
C17orf50	1.93372581358924	-0.677521649434034	0.151913311708635	-4.4599228455601	8.1989162962673e-06	1.32178853074908e-05
C17orf51	767.125969545038	-0.721694017015383	0.0568799346668731	-12.6880247180681	6.89016313985429e-37	3.40522822042712e-36
C17orf53	49.8324485267866	1.07263081280775	0.0801192815351402	13.3879235092403	7.11420139898335e-41	4.07287752485609e-40
C17orf54	0.0493242997321124	0.0327464606415727	1.50722270525186	0.0217263583725676	0.982666237792176	0.999641322860956
C17orf55	2.72943969098763	-0.850401606378766	0.158818865688224	-5.3545377162445	8.57754285048832e-08	1.51557743047714e-07
C17orf56	345.156504932674	-0.0701367186534436	0.0474247709240444	-1.47890474296175	0.13916577554755	0.170383742120874
C17orf57	12.5602282505838	0.274430164863987	0.0949723438541853	2.88957978425098	0.00385757103295609	0.00533068181152238
C17orf58	232.422772894577	0.600817156912602	0.0389297992381974	15.4333484546483	9.76686539548488e-54	8.61248099353634e-53
C17orf59	265.659632591348	-0.443920861848474	0.0405922397332827	-10.9361016974013	7.74593611555008e-28	2.82828682296094e-27
C17orf60	32.8529757321542	1.08639159762052	0.109198272141081	9.94879842253308	2.55246380884298e-23	7.98823651447654e-23
C17orf61	419.978888918252	0.180504413922332	0.0606457168168474	2.97637530557125	0.0029167767017722	0.00405891643097441
C17orf62	1441.59972081629	0.384465902630844	0.0370078539572152	10.3887651274058	2.78941092668292e-25	9.34186396344577e-25
C17orf63	645.051945531523	-0.0553183476519866	0.0323555890626795	-1.7096999082546	0.0873213797332704	0.109051326809842
[truncated: 18,502 more rows]

## Sheet: DEG
gene_name	baseMean	log2FoldChange	lfcSE	stat	pvalue	padj
ATP5EP2	74.4610088448714	2.73334	0.0651593897366045	41.9484902149937	0	0
EEF1A1P9	4422.87670590525	-4.12314	0.0537859065645614	-76.6583386543901	0	0
FTHL3	258.048548241504	-6.26552	0.0833451645714806	-75.1755531484255	0	0
GCSH	70.5177959122735	-3.68322	0.0660096196723584	-55.7981778496692	0	0
HNRNPA3P1	57.0573399522495	-2.55628	0.0478427926075895	-53.4308858665622	0	0
LOC442454	92.726154188435	-4.45517	0.0758541837617744	-58.7333518639606	0	0
LOC643387	30.0103510429477	-5.75457	0.134377440260878	-42.8239519493041	0	0
LOC728643	51.0896754461456	-5.37095	0.0982657446213738	-54.6574084135957	0	0
NACAP1	97.1157823259635	-5.24056	0.0799632654191274	-65.53713623552	0	0
PA2G4P4	73.9217602882795	1.67454	0.040474695279129	41.3725293439696	0	0
PPIAL4C	14.3046311217969	-3.89576	0.100395841051723	-38.804007561103	0	0
RPL23P8	67.5068799695529	-3.24209	0.0857583918804262	-37.8049846353192	0	0
SUMO1P3	170.566794693106	1.40927	0.030737249032683	45.8489558618698	0	0
ATP6V1C2	45.37733460052	1.6755	0.0448193163900708	37.3834909046139	7.24714453169591e-306	1.02614e-302
UBE2MP1	138.318723964609	1.71793	0.0465587787688721	36.8981575865654	4.94637479687157e-298	6.5368e-295
LOC644936	26.2011050388392	-5.85284	0.160410352568078	-36.4867028356388	1.80224148654173e-291	2.23286e-288
PMS2L2	86.2810795420312	1.93574	0.0557047027129349	34.750043372203	1.38390441111896e-264	1.61371e-261
PPIA	4726.12845433684	1.293	0.0372783141648318	34.6849593073021	1.32810270174473e-263	1.46261e-260
RPL17	3263.07525100398	-2.05152	0.0596207270752747	-34.4095548368174	1.81455200839705e-259	1.89315e-256
ZNF90	224.499821588115	2.39565	0.0709232977430618	33.7780187337941	4.14756867486365e-250	4.11086e-247
FAM71D	11.8573121171922	-2.08521	0.0618864655493823	-33.6940985012288	7.05374227463489e-249	6.6584e-246
GUSBL1	28.9880923438167	-2.61305	0.0784013017421699	-33.3291551719348	1.46047723302439e-243	1.31596e-240
H3F3C	358.054314997273	-1.62604	0.0490155352594884	-33.1739230564772	2.55987863177881e-241	2.20628e-238
LRRC37A4	281.655139536319	-2.49754	0.0758424926243551	-32.9306047579031	8.01867684640266e-238	6.62309e-235
EDARADD	79.8731396049088	2.64046	0.0807760920248124	32.6886212526477	2.26637127084474e-234	1.79705e-231
CDC26	69.6783555869631	-2.10458	0.0648211215480363	-32.4675092414146	3.06669576109735e-231	2.33812e-228
LYPLA1	774.503775303843	1.53864	0.0481551267847945	31.9516821	5.11958309927616e-224	3.75872e-221
RPL13AP3	8.09427377027396	-5.81118	0.18465991117164	-31.4696288518151	2.26228113036854e-217	1.60161e-214
LOC407835	104.196845204392	1.25587	0.0400942517662314	31.3230501741961	2.26572916539346e-215	1.54874e-212
CPEB3	290.66092807819	-2.13086	0.06867810568591	-31.0267192868241	2.35166494472304e-211	1.5539e-208
TNRC6C	1296.59901289369	-1.45924	0.0472687861662409	-30.8711056767705	2.9184218942938e-209	1.86619e-206
TARSL2	615.338240997875	-1.36925	0.0447573268372073	-30.5927434569147	1.52859364905297e-205	9.46916e-203
SLC6A10P	14.2141087822097	-5.01014	0.164075929659585	-30.535525353209	8.80251980385575e-205	5.28765e-202
PRDX4	1275.08502569783	1.66166	0.0548970309188665	30.2686486251603	2.96556197713472e-201	1.72901e-198
BRD7	1404.71645564946	-0.85323	0.028296392013555	-30.1533050339939	9.70783837383593e-200	5.49824e-197
OSTC	723.293805410189	1.48051	0.0496432720723273	29.8229367322774	1.97018042542652e-195	1.08486e-192
DYNC1H1	13109.4558688782	-1.20774	0.0408662072780034	-29.5534520336905	5.92950483554568e-192	3.14379e-189
SPTAN1	16783.6215523333	-1.14684	0.0388062129324545	-29.5529034257191	6.02653571865322e-192	3.14379e-189
MYO18A	2445.04424229114	-1.29435	0.0438541399766234	-29.5148136650503	1.85857786482698e-191	9.44682e-189
CNIH4	583.52760730602	1.01393	0.0345250695145947	29.3678073232796	1.41578270680146e-189	7.01627e-187
ZMYND11	3104.06345279037	-1.31423	0.0447886992100664	-29.3429058737506	2.94326578882834e-189	1.42303e-186
TUBA1C	1463.551536944	3.05341	0.104726751521432	29.1559950603347	7.01298599711432e-187	3.30996e-184
GPN1	804.644957441775	0.943467	0.0324381152608705	29.0851477883832	5.53293664822777e-186	2.55068e-183
MLLT6	3966.01824985907	-1.08626	0.0374309588480098	-29.0204073845653	3.63731327595866e-185	1.63869e-182
C10orf4	508.435309686759	-1.44102	0.0500406599536225	-28.7969295111087	2.34351021041433e-182	1.03234e-179
FRY	1600.40021994814	-1.84162	0.06415119369485	-28.7074987361385	3.07560156254944e-181	1.32538e-178
ZRANB1	1157.80952251353	-1.19743	0.0417960885422716	-28.6492541490701	1.63771448453917e-180	6.90732e-178
DST	10906.5569168328	-1.61176	0.0563293791034658	-28.6132066298073	4.6026971415673e-180	1.90082e-177
COMMD10	388.13992906662	1.22883	0.0432074676296605	28.4402737838104	6.4284277685314e-178	2.60063e-175
LOX	338.94127657476	3.88978	0.13714573513073	28.3623577790012	5.89319675350657e-177	2.33642e-174
NUMA1	9273.61435106266	-1.3253	0.0468125502548662	-28.3108024084591	2.5444926441863e-176	9.89009e-174
KIAA0427	2041.85361731485	-1.41016	0.0499344615530715	-28.240202923382	1.87774717756157e-175	7.15819e-173
C20orf24	1111.2131073165	0.958601	0.0339920932053704	28.2007015181613	5.73287137591709e-175	2.1442e-172
ZNF638	2131.17568661749	-0.881748	0.0313722940544877	-28.1059529527318	8.28524154490753e-174	3.04145e-171
FAM190B	2037.51654377174	-1.35695	0.0488831775690017	-27.7589673951555	1.3581200537273e-169	4.89491e-167
ZNF33A	635.654988935766	-1.10521	0.0399476650305923	-27.6663699607274	1.77352848213959e-168	6.27797e-166
C5orf53	1063.8226085457	-1.43982	0.0522543963077485	-27.5540631688375	3.95609644161971e-167	1.37582e-164
CSMD3	627.983546844796	-3.99112	0.14496593246956	-27.5314363414435	7.38375414982032e-167	2.52359e-164
UPF2	785.879562138321	-1.19684	0.0435786449193428	-27.4638036915506	4.75352827050142e-166	1.5971e-163
SCAPER	718.133191061183	-1.20705	0.0439518280557639	-27.4631176027349	4.84406587725313e-166	1.6004e-163
NET1	1318.30175236187	-1.95009	0.0710524266423854	-27.4458078176517	7.79602589543823e-166	2.53345e-163
LDHA	5386.87477096179	2.13955	0.0779949329063796	27.4318521377666	1.14392325541382e-165	3.65742e-163
TBL2	766.254411552314	0.920846	0.0335773194892663	27.424639198066	1.3945396610656e-165	4.38793e-163
CKLF	350.236397260513	1.2834	0.0468300510177905	27.4053755085473	2.36642261717819e-165	7.32962e-163
TMOD2	5128.57223084077	-1.68074	0.0613982027940526	-27.3744325604753	5.52912999173025e-165	1.68621e-162
TTC3	8141.98060695281	-1.39754	0.051077276828157	-27.3613808458811	7.90665032660289e-165	2.37475e-162
KCNIP3	1589.86571837237	-2.57273	0.0943000962786275	-27.2824166986132	6.85824799925081e-164	2.02912e-161
PRLHR	147.86345444706	-6.11803	0.22450616469662	-27.2510652545356	1.61424177994377e-163	4.70575e-161
JMY	858.064873350021	-1.07571	0.0395169621838267	-27.2214304578547	3.62223478266925e-163	1.04063e-160
PLIN2	609.062129298289	2.31491	0.0850614624474979	27.2145104813459	4.37406357122184e-163	1.23867e-160
ANKRD26	248.509273730308	-1.50993	0.0555762299578328	-27.1686875219008	1.52316066683965e-162	4.25262e-160
PSMC2	1655.55088896046	0.856332	0.0315671517619123	27.1273157280576	4.69017040869256e-162	1.2913e-159
CTCFL	10.5091248228285	-2.2335	0.0825605984897284	-27.0528203180849	3.53853224382343e-161	9.60881e-159
TUB	2477.85661781157	-1.93697	0.0717249670692691	-27.0055352950668	1.27245343180021e-160	3.40863e-158
HDAC4	1426.72874714655	-1.60303	0.0594302333362448	-26.9733558376714	3.03630596449336e-160	8.02516e-158
TOM1L2	3111.91772646868	-1.23598	0.0458443191277879	-26.9602758737343	4.32257083747547e-160	1.12745e-157
ANXA2P1	22.8427245322798	3.12274	0.115994166457359	26.9215143081181	1.22994731135062e-159	3.1664e-157
ABLIM1	5158.84078237084	-1.54841	0.0577155508664859	-26.828291936466	1.51162867464678e-158	3.84167e-156
ALDH5A1	2580.53587888544	-1.57453	0.058740245802234	-26.8050331044992	2.82293420332711e-158	7.08342e-156
PGK1	7419.80501793047	1.39624	0.0521306078622011	26.783474793713	5.0340159076095e-158	1.24737e-155
NALCN	952.644395105015	-2.13594	0.0799670481940858	-26.7102667686023	3.57672659438336e-157	8.75327e-155
MYH6	29.0928837217562	-4.09609	0.153569758215533	-26.67249209286	9.81701907500812e-157	2.3732e-154
SHQ1	194.149975564823	0.826977	0.0310055546956287	26.6719026862753	9.97278940825124e-157	2.38181e-154
TOP1P2	2.8630478011885	-4.31824	0.162104255168265	-26.6386746795875	2.42109626669833e-156	5.7135e-154
CMC1	118.447969216368	1.24564	0.0469536559974891	26.5291389073537	4.47109306624645e-155	1.04271e-152
RAP1B	1447.44736850606	1.26759	0.04784769779409	26.4921895135181	1.19242686187053e-154	2.74854e-152
FAM171A1	2388.1399694297	-1.61075	0.0612285380421763	-26.3072142977964	1.5858138715466e-152	3.61329e-150
EDEM2	478.437836348687	1.11775	0.0424920334055719	26.3048972583837	1.68562725809535e-152	3.79707e-150
FCHSD2	2660.98297587169	-1.3918	0.0529578810512289	-26.2812410197926	3.14253563480146e-152	6.99938e-150
CRY2	1820.06315560259	-1.67492	0.063747305767761	-26.2743425674007	3.76808856913607e-152	8.29942e-150
ACBD5	1924.16126084581	-1.12688	0.0429061256930791	-26.2639358231329	4.95471225479451e-152	1.07931e-149
GABBR1	9476.34777017512	-2.38134	0.0907131902466018	-26.2513097093095	6.9057216906508e-152	1.47196e-149
TMED2	2996.9927263267	0.843754	0.0321410689584456	26.2515967219893	6.85381133538019e-152	1.47196e-149
KIAA1279	1203.76407350942	-0.920443	0.0350965890455821	-26.2259974363972	1.34297469795641e-151	2.83211e-149
ZBTB47	2902.96895830813	-1.35964	0.0518992125088546	-26.1976561888075	2.82594003543633e-151	5.8967e-149
RABGAP1	2478.97012084209	-0.932	0.0355968193609806	-26.1821204153012	4.24742415572905e-151	8.77049e-149
RICTOR	1135.74532871644	-1.53844	0.0587999400772033	-26.1639127752858	6.84525170847622e-151	1.3989e-148
IK	1786.81222093844	-0.671237	0.0256752773223698	-26.143304919801	1.17436267543332e-150	2.37545e-148
VEGFA	3063.05571864915	3.09173	0.118349563041039	26.1236876976477	1.96234595108875e-150	3.92925e-148
MRPL36	350.227276638414	1.03969	0.0398312499559507	26.1023662630315	3.42712595858505e-150	6.79359e-148
RAB6C	78.9762292396775	-1.49166	0.0571537435038212	-26.0990347839415	3.73894393959121e-150	7.33833e-148
HIPK2	10873.0658644121	-1.65402	0.0634038859280263	-26.0869740695448	5.12414841821019e-150	9.95843e-148
GLA	293.884628631487	1.19324	0.0458635815235409	26.0171886630238	3.16484853675601e-149	6.09095e-147
CYTH1	1435.87603477547	-1.26991	0.0488569269208062	-25.9924183428446	6.03274565708484e-149	1.14988e-146
NXT1	318.064260313874	1.39401	0.0536406009923729	25.9878765050459	6.78978660057075e-149	1.28185e-146
MGEA5	3808.67023795565	-1.00947	0.0388558998804384	-25.9799173634209	8.35227901944667e-149	1.56195e-146
GNAL	294.282872665574	-3.02833	0.116716011538566	-25.946173424144	2.00840451993336e-148	3.7208e-146
FAM13C	511.835080825939	-1.96485	0.0758297503737303	-25.9112715046156	4.9711187609755e-148	9.1243e-146
ZCCHC24	5447.05799071809	-1.42916	0.055226331799053	-25.8783116069941	1.16861416662868e-147	2.12527e-145
NACA2	80.0012650816338	-1.80542	0.0698208583726504	-25.8579140432579	1.98228701479194e-147	3.57226e-145
HERC1	1861.74902887745	-1.30529	0.0505579538209257	-25.8177296495762	5.6073546772563e-147	1.00139e-144
ATP9A	7106.9038092097	-1.62463	0.0629839027868137	-25.7943038830401	1.0272905066514e-146	1.81821e-144
BZW1	3385.04437236427	0.774255	0.0300221869372194	25.7894358990103	1.1649373964847e-146	2.04359e-144
ARF4	3261.87458516571	0.955632	0.0370714782700014	25.7780842709302	1.56172964166944e-146	2.71563e-144
C7orf68	524.673024088998	2.28408	0.0886808365673325	25.7561755755045	2.74880389172208e-146	4.73822e-144
C3orf38	462.138855629107	0.842489	0.0327161339172849	25.751476355571	3.1030040221993e-146	5.30266e-144
NCRNA00152	138.257261070189	3.46592	0.134879522946667	25.6964294657743	1.28138647978069e-145	2.17102e-143
HNRNPH3	3041.7116595692	-0.888071	0.0346044917978143	-25.6634493453464	2.99262396639819e-145	5.02735e-143
UBE2A	1519.87404578262	0.728629	0.0283923227341421	25.6628829852343	3.03650498919543e-145	5.0582e-143
TMEM49	1405.12390391704	0.99246	0.0386746663351577	25.6617619655649	3.1252638121162e-145	5.16268e-143
LOC399744	165.846280760891	-1.78527	0.0696542554113171	-25.6304962979793	6.97671019649096e-145	1.14297e-142
C2orf28	1790.51378564196	1.13706	0.0443986538954895	25.6102900416519	1.17171784953424e-144	1.90385e-142
MPRIP	3332.94491541018	-0.908102	0.0355018678311761	-25.5790023741534	2.61296717979574e-144	4.21113e-142
SYT15	98.1692281322511	-2.33718	0.09140918392938	-25.5683052959332	3.43654572503786e-144	5.49376e-142
NBR1	4383.70227416698	-0.789028	0.0308620309292849	-25.5663029641103	3.61734062609393e-144	5.73652e-142
NUP37	195.536101150783	1.09154	0.0427031982106805	25.5610559069704	4.13744248563771e-144	6.50925e-142
RPL12	4336.66938080892	-1.42496	0.0557748287989421	-25.5484563562984	5.71187777817704e-144	8.91548e-142
KDELR2	2943.17192403384	1.17606	0.0460525328399462	25.537284219875	7.60155108035461e-144	1.17723e-141
GGH	431.432837823094	1.69201	0.0662724578520124	25.5311734262222	8.88731792783571e-144	1.36568e-141
HNRNPUL2	3604.11936411377	-0.908682	0.0355956408290117	-25.5278913547284	9.66531039391695e-144	1.47381e-141
TMEM60	298.285469910757	0.973663	0.038159656932169	25.5155050329716	1.32652394576899e-143	2.0073e-141
SMARCC2	4885.18248230262	-0.815369	0.0319693668239654	-25.5047116713549	1.74774009923454e-143	2.62466e-141
C15orf21	19.8361262748425	-2.31463	0.0908121849242993	-25.4880687009785	2.6732902390586e-143	3.98441e-141
IKBIP	249.073239132312	1.70931	0.067281834866432	25.4052839435336	2.20464201129357e-142	3.26139e-140
PSMA2	1927.22346752302	0.942119	0.0372213338115052	25.3112588973203	2.40124923685674e-141	3.52592e-139
CAPZA1	1532.92680659241	1.13618	0.0448990720401534	25.305139579112	2.8041461350675e-141	4.08725e-139
FOXO3B	871.495361151217	-1.12701	0.0445596534060162	-25.2922473880547	3.88748606644002e-141	5.62494e-139
RALGAPA1	706.688046859115	-1.0632	0.0420746566248573	-25.2694523325666	6.92362822203112e-141	9.94544e-139
IFNGR2	1242.96660450507	1.24948	0.0495805958806201	25.2009363160465	3.91210846624388e-140	5.57912e-138
MYST4	1147.44907895489	-1.45355	0.057708030526688	-25.1879575541641	5.42806512105777e-140	7.68575e-138
MLX	798.554016926636	0.780302	0.0309900035744749	25.1791598397222	6.77668976649764e-140	9.52726e-138
ZCCHC9	220.274684816493	0.951276	0.037803163256746	25.1639185346606	9.95166084674697e-140	1.38924e-137
C5orf62	709.911100608645	2.29114	0.0911095119747759	25.1471061470576	1.52005243299913e-139	2.10713e-137
RAN	3318.52034583059	0.773186	0.0307677543923609	25.1297489418208	2.35317615937817e-139	3.23938e-137
PIGC	482.441186964875	0.750035	0.0298766283277183	25.1043917836666	4.45340905084463e-139	6.08827e-137
KIAA1109	2130.08269215651	-1.35139	0.0538692073906595	-25.0864175864266	6.99680497896857e-139	9.49984e-137
GPX7	249.903231225338	1.71436	0.0683538853218256	25.0806311524323	8.09161006561958e-139	1.09116e-136
ATP8B5P	24.0883444588847	-1.68497	0.0671887608687072	-25.0781362169169	8.61494377243323e-139	1.15388e-136
TMEM106C	995.2204226929	1.7264	0.0688718399355536	25.0668520448014	1.14371785304987e-138	1.52161e-136
HERC2	2436.2120266882	-1.08911	0.0435257577743474	-25.0221672676441	3.50843873671146e-138	4.63652e-136
KDELR3	81.0209489736374	3.07292	0.122855608919563	25.0124337650792	4.47750033729145e-138	5.87798e-136
WDFY3	2717.2497288557	-1.21109	0.0484532752954552	-24.99502715456	6.92396843862778e-138	9.02986e-136
USP34	2786.69816978631	-0.948784	0.0379975909987911	-24.9695759990634	1.30897967128467e-137	1.69594e-135
TEF	1496.99512673391	-1.75886	0.0704431572810093	-24.9684513950005	1.34631752724773e-137	1.73299e-135
WAC	3028.54498110626	-0.912692	0.0366674467591502	-24.8910684628093	9.29619485598565e-137	1.18889e-134
DIP2C	1431.23052874111	-1.24881	0.0501758368899004	-24.8885847653439	9.88999290763331e-137	1.25673e-134
DNM3	1500.48816494392	-2.03148	0.0816811907198396	-24.8708233611377	1.53963968620838e-136	1.94397e-134
TMSL3	28849.3976173601	1.71545	0.0690413983126094	24.8466608262479	2.80995231956747e-136	3.52542e-134
C8orf76	306.055580010911	1.00951	0.0406434304993089	24.838129112042	3.47452597181758e-136	4.33179e-134
INO80D	462.310527422713	-0.834697	0.0336091767634413	-24.8353950930894	3.719063772374e-136	4.60769e-134
DHTKD1	1258.19535648176	-1.18027	0.0476091644239198	-24.7907492564489	1.12803899882788e-135	1.38032e-133
WBP11P1	6.57206462840541	-3.08894	0.124599757010328	-24.7908680223825	1.12471722343557e-135	1.38032e-133
PTX3	268.700024505608	3.74238	0.151037235583442	24.7778834709524	1.55250205313817e-135	1.88805e-133
KIAA0430	2130.69434439804	-0.912957	0.0368523552585885	-24.7733756951068	1.73625795675193e-135	2.09865e-133
GLB1	851.278347905299	1.02563	0.0414537649745721	24.7414742660636	3.82980475330867e-135	4.6011e-133
CALU	3052.63536206588	1.61345	0.0652299144916622	24.7348647109981	4.51131385468859e-135	5.38722e-133
MAPT	9210.44754981958	-1.63782	0.0662964562765015	-24.704519740461	9.56327595206511e-135	1.12841e-132
NPIP	1007.63679654728	-1.58402	0.0641206160592922	-24.7037395604114	9.74968998962661e-135	1.1436e-132
CLIC1	1992.61164122331	2.37992	0.0963833483601123	24.6922819139219	1.29446032724564e-134	1.50942e-132
AARS	5858.65416893669	-0.791617	0.0321129422847822	-24.6510190518192	3.58867773154984e-134	4.16014e-132
NAP1L3	1867.50574141006	-1.69865	0.0689723076817733	-24.6280061430989	6.33279445773943e-134	7.29855e-132
USP20	1201.53922927513	-0.864632	0.0351136761148105	-24.6237936204938	7.02622278702236e-134	8.05091e-132
FOXO4	792.652245776547	-1.42641	0.0580100127524506	-24.5890693667254	1.65352720080436e-133	1.88379e-131
DYNC1I2	2029.72541042648	-0.719549	0.0293244146592932	-24.5375233789531	5.87755980247821e-133	6.65776e-131
TXNDC5	1761.56571408128	1.18054	0.0481144827356661	24.5361420451142	6.08052684510886e-133	6.84854e-131
KIF3A	1507.77141533459	-1.4332	0.058441008214349	-24.5238654531655	8.22135480479679e-133	9.20745e-131
TNK2	6257.96212818579	-1.98415	0.080916030980029	-24.5210385156421	8.81251925039578e-133	9.81408e-131
PAR5	80.7009771770714	-2.49446	0.101883561646669	-24.483463639316	2.21618173230994e-132	2.45427e-130
AKAP6	2429.90812317532	-1.665	0.068062287690369	-24.4628705644227	3.67150700675486e-132	4.04335e-130
LARP4B	1032.67958452256	-0.840497	0.034364651584242	-24.4581709513143	4.11956956721473e-132	4.50396e-130
PC	1855.66439596089	-1.29607	0.0529914903135024	-24.4580163794135	4.13519926379718e-132	4.50396e-130
LOC541471	176.299373112828	3.16804	0.129653716265049	24.4346062469534	7.33590906223407e-132	7.94643e-130
RPA3	241.044405732232	1.34994	0.0552515810495361	24.4326563694855	7.6944821171295e-132	8.28955e-130
C12orf51	2162.22067680786	-1.3124	0.0537530545721859	-24.4153362944623	1.17544947168545e-131	1.25951e-129
EIF3A	4071.49960405567	-1.00843	0.0413047095375882	-24.4144498728877	1.20120915338962e-131	1.28019e-129
WDR37	757.589027605405	-1.11973	0.045881573879093	-24.4048903703866	1.51749857348012e-131	1.60863e-129
SLC22A6	76.5358903758852	-4.04711	0.165865797001406	-24.3999129113476	1.71382643732513e-131	1.80708e-129
COL1A2	4391.68871041423	3.5811	0.146859637668703	24.3844852505864	2.49845739870677e-131	2.62047e-129
MMADHC	1038.94570436724	0.69023	0.0283723994526925	24.3275022192418	1.00330397702423e-130	1.04676e-128
TAOK2	2169.9003273905	-0.739717	0.0304330528637272	-24.3063570361014	1.67925645826407e-130	1.74282e-128
LOC341056	9.83700337509316	-2.2326	0.0919330888803369	-24.2850574378867	2.81993447717901e-130	2.91144e-128
RBM17	1827.32086204938	-0.871313	0.0359210378269719	-24.2563512301297	5.66673038709987e-130	5.82029e-128
HMGN5	374.002158344113	-1.67424	0.0690633424069824	-24.2421167034538	8.00746072289965e-130	8.18206e-128
MLL	2608.79994116473	-1.35052	0.0557325722743668	-24.2322313817389	1.01794648528374e-129	1.03481e-127
HDAC5	2179.31089706264	-0.960798	0.0396908885627178	-24.2070149847034	1.87677826552808e-129	1.89813e-127
SEP15	2539.29108564266	1.21458	0.0501808566042656	24.204148799148	2.01184521175381e-129	2.02441e-127
BZRAP1	1629.93698729099	-2.15713	0.0894301075355424	-24.1208400060411	1.51112078700278e-128	1.51288e-126
TPM4	4112.49275772197	1.4158	0.0587447470300914	24.1009568698503	2.44262611308246e-128	2.43317e-126
PLA2G6	689.559373039648	-1.23521	0.051318254764732	-24.0695537085019	5.21076287937786e-128	5.16465e-126
PRKCA	4594.62292208121	-1.25145	0.0520168240558664	-24.0584996528946	6.80181268024691e-128	6.70808e-126
GUSB	869.340355325946	1.34786	0.0561131757495381	24.0204589924926	1.70005179548365e-127	1.66832e-125
KTI12	200.575209033579	0.819385	0.0341292643579129	24.0082757360791	2.2790017116614e-127	2.22545e-125
RAB32	255.375051975767	2.16743	0.09032954074171	23.9946453109945	3.16278685793459e-127	3.07333e-125
MICAL3	2456.48065425057	-1.22535	0.051114220306409	-23.9727559253685	5.3513644143587e-127	5.17464e-125
TRIM8	2622.06358664372	-1.02655	0.0428456631081175	-23.9591791945524	7.41344759961746e-127	7.13382e-125
TRAM1	2267.74225165244	1.10001	0.0459207584037004	23.9545733880997	8.27987539588956e-127	7.92908e-125
CRTAC1	1156.20904080676	-3.0526	0.127552628022361	-23.9320556389917	1.4209555725126e-126	1.35421e-124
RGPD4	119.511869536639	-0.911902	0.038107102230064	-23.929983421703	1.4933264487893e-126	1.41637e-124
MTSS1L	15541.048303023	-1.40145	0.0586477000789118	-23.8960114235524	3.36960044852239e-126	3.18074e-124
C14orf119	669.760107602684	0.884582	0.0370186214146857	23.8955984058454	3.40307961477454e-126	3.19712e-124
PIP4K2B	4985.97113160946	-0.862469	0.0361302391097668	-23.8711206756062	6.11235753186122e-126	5.71534e-124
FBXW4	1289.13962289379	-1.30381	0.0546392412046349	-23.8620943438941	7.58458081196532e-126	7.05865e-124
KCNB1	271.243672370518	-2.71521	0.113790066496331	-23.8615893337511	7.67669340529174e-126	7.11099e-124
PDCD4	1252.03335055188	-0.976083	0.0409095962901833	-23.8595110661008	8.06766675829594e-126	7.43839e-124
SPHKAP	525.90610148332	-3.74435	0.156993471872378	-23.8503459124422	1.0043054141964e-125	9.21683e-124
SLAMF9	6.65703256256664	5.02135	0.210601150764402	23.8429220258377	1.19918374339201e-125	1.09546e-123
DZIP3	1032.92751170837	-1.04363	0.0438310458711377	-23.8102186642411	2.61749518022489e-125	2.38012e-123
CEP290	450.810254258929	-1.12664	0.0473259014956505	-23.8059762940723	2.8961960002648e-125	2.62152e-123
ZNF322B	21.9907398898877	-1.37792	0.0578877257037977	-23.8033738429549	3.08162667200722e-125	2.77669e-123
C20orf111	724.958602414238	0.770338	0.0323638618290952	23.8024039103578	3.15372849345579e-125	2.82879e-123
PSMA1	1587.53755976839	0.738608	0.0310490715721297	23.7884117616319	4.40226969202947e-125	3.93091e-123
ATP8A1	1914.12743832106	-2.07416	0.0874207413618162	-23.7261336330918	1.93809564494862e-124	1.72282e-122
FAM123A	924.58045234188	-2.01877	0.0851214349171851	-23.7163715721918	2.44411784827435e-124	2.16294e-122
CASKIN2	1622.22646908011	-1.15134	0.0485769607326227	-23.7012914053456	3.49681029217327e-124	3.08077e-122
DDOST	2972.25491087471	0.969931	0.0409379118404349	23.6927299020001	4.28488305022891e-124	3.75837e-122
VKORC1	980.362206000219	1.21181	0.0512001130859778	23.6681096967964	7.68404471718658e-124	6.71017e-122
FAM35B	139.004289895211	-0.957394	0.0404653622595811	-23.6595968056967	9.40228118421071e-124	8.17462e-122
PDIA6	3990.88172888501	0.971202	0.0411009793056495	23.6296484858468	1.91122821234848e-123	1.64723e-121
SNRPD2	2074.992354097	1.29613	0.0548603441374274	23.6259451439037	2.08632484263959e-123	1.79036e-121
C15orf48	14.1933793246261	4.18834	0.177598818324103	23.5831661043321	5.73730829815767e-123	4.90218e-121
LRP1B	1211.21972605241	-1.87247	0.0794703699804702	-23.5618150136296	9.49904320890729e-123	8.08153e-121
FAM192A	2713.4703127949	-0.705867	0.0299825652914566	-23.5425673474506	1.49592540246498e-122	1.26725e-120
MYH7B	108.731830505636	-2.71218	0.115204564344988	-23.5423253293067	1.50448847412442e-122	1.26908e-120
DGKK	32.71645976991	-7.05672	0.299890622812514	-23.5309705507018	1.96636583664854e-122	1.65166e-120
DDX42	3259.61607576807	-0.696122	0.0295967324364947	-23.5202442257518	2.5319372095541e-122	2.11775e-120
REPS2	917.218075934983	-2.43811	0.103685372543688	-23.5144882833922	2.89965912070996e-122	2.41512e-120
HTATSF1	3098.72325569182	-0.940403	0.0400535704640491	-23.4786308968041	6.74390407749015e-122	5.59349e-120
PPP1R12B	1405.86493492554	-1.29044	0.0549732280084281	-23.4739826090352	7.52296930021973e-122	6.21366e-120
CCDC109B	251.932411613623	2.68616	0.114456753692927	23.4688048784667	8.49696695049499e-122	6.98902e-120
CDHR1	914.697489588096	-2.58931	0.110398176217365	-23.4543002531542	1.19487456112866e-121	9.7876e-120
BCR	4239.92545946633	-1.50353	0.0641424526974511	-23.4404567048771	1.65404599863238e-121	1.34931e-119
MXI1	2210.20227093277	-1.21805	0.0519888632123303	-23.4290103659905	2.1639883567264e-121	1.75806e-119
MDN1	1105.11797825299	-1.50963	0.0644377898246369	-23.4276481281509	2.23429529051155e-121	1.80777e-119
OST4	1674.77327251494	1.06786	0.0456416303810238	23.3966389904369	4.62388821577642e-121	3.72599e-119
IAH1	555.201324460404	0.894561	0.0382353253042496	23.3961794013577	4.67396740728497e-121	3.7511e-119
LGALS3	1537.13751012594	2.81194	0.120201915921276	23.3934408290065	4.9838031190721e-121	3.98363e-119
KIAA0232	1890.99604332599	-0.844543	0.036131681054663	-23.3740200438282	7.85500728228793e-121	6.25341e-119
SAFB	2128.68091913059	-0.851168	0.0364263356620857	-23.3668264671887	9.29591279822513e-121	7.37092e-119
LOC339674	460.435616266729	-1.98784	0.0850886987742537	-23.3619272716735	1.04254548260339e-120	8.23362e-119
FSTL5	232.202280942722	-3.67779	0.157437688249887	-23.3602799073086	1.08352521445324e-120	8.5233e-119
GNAO1	5219.84445257719	-1.49964	0.0642150842070888	-23.3533849029794	1.27323308782424e-120	9.97601e-119
HPSE2	132.306888608413	-4.72608	0.202393344120316	-23.3509564918062	1.34766260632874e-120	1.05176e-118
C14orf142	187.116757286188	1.10146	0.0471734249038751	23.3491939612967	1.4043886978219e-120	1.09173e-118
PHYHIPL	5868.84304101777	-1.84563	0.0790673788845736	-23.3425057444211	1.64218827588547e-120	1.27161e-118
PLP2	599.239337178762	2.635	0.112885104370538	23.3423292349075	1.64898073388698e-120	1.2719e-118
SPAG9	6159.23816172009	-0.889565	0.0381143536793253	-23.3393652977642	1.76732072875342e-120	1.35789e-118
RPL7	928.376481568636	-1.3416	0.0575180249498674	-23.3248679156925	2.48019796830668e-120	1.89826e-118
CMTM4	2276.93762981264	-1.44645	0.0620543614658313	-23.3093445968881	3.56427468322919e-120	2.71749e-118
ERGIC3	3630.73999981322	0.853637	0.0366294439977471	23.3046692079027	3.97541748354004e-120	3.01934e-118
SPCS2	877.903898755619	-0.748098	0.0321380031571457	-23.2776674494608	7.46471572317978e-120	5.64783e-118
NCRNA00093	39.8661896486703	-3.99667	0.171836812393322	-23.2585148730679	1.16656818422905e-119	8.79273e-118
WTAP	1734.61309965294	0.973765	0.0418991743482774	23.2406645234166	1.76799214946339e-119	1.32753e-117
ALDH2	6965.78076341159	-1.52739	0.0657241346350063	-23.2393759034485	1.82184062567973e-119	1.36281e-117
SCD	25565.4606267222	-1.93552	0.0833017742068481	-23.235059632074	2.01441841750628e-119	1.5012e-117
SBF1	3826.47869700544	-1.07924	0.0464537784302273	-23.2325189960923	2.13713912630493e-119	1.58669e-117
SURF6	920.713872956093	-0.805348	0.0346950357028856	-23.2121947005249	3.42916952155931e-119	2.53643e-117
NSMCE2	208.669953043598	0.959806	0.0413554823385321	23.2086670252299	3.72232473165667e-119	2.74304e-117
C20orf194	1472.99386161032	-1.11493	0.0480622353152682	-23.1976045469008	4.81390015896865e-119	3.53429e-117
SIK3	2182.93210675543	-1.05861	0.0456682351083953	-23.1805300355844	7.15766059579108e-119	5.23566e-117
NEURL4	1091.35838265666	-0.903536	0.0389823207937586	-23.1780844956333	7.57591573566057e-119	5.52123e-117
CALN1	1033.09955125603	-3.41578	0.147462481380868	-23.1636940468816	1.0580709586621e-118	7.68284e-117
JMJD1C	1695.75508484581	-1.22395	0.052840155456119	-23.1632206011431	1.06976008518038e-118	7.73936e-117
USP54	2981.79458662384	-1.66389	0.071836407965465	-23.1621868722653	1.09573220898378e-118	7.89844e-117
HDAC3	888.509172587049	0.674834	0.0291388811032391	23.1592181758776	1.17387192472875e-118	8.43104e-117
NCAM1	15813.3643606762	-1.28799	0.0556574300791876	-23.1414213909092	1.77371247254752e-118	1.26932e-116
MCF2L2	331.608904491021	-2.58128	0.111546687974429	-23.1407909987928	1.79982583785686e-118	1.28338e-116
LRIT2	23.0941918023528	-3.19122	0.13800041077336	-23.1246919453819	2.6137827700122e-118	1.8571e-116
NOP10	828.625633793214	1.10161	0.0476457141599784	23.1208593102662	2.85646489126979e-118	2.02228e-116
NTAN1	236.60504369181	1.16832	0.0505877052979468	23.094997045181	5.19825615090974e-118	3.66708e-116
MYH7	730.164314264777	-2.90308	0.125782010367594	-23.0802689050573	7.3081974706346e-118	5.13725e-116
FLRT1	539.188277726162	-2.09434	0.0907645275892955	-23.074454735863	8.35970676605214e-118	5.85563e-116
PCNA	1571.26920279819	1.32225	0.0573528620991336	23.0546659460261	1.32063512094552e-117	9.21794e-116
DGCR2	5760.57991129723	-1.12645	0.0489356895955267	-23.0188974560704	3.0151528937133e-117	2.09717e-115
RPN1	4310.11775984482	0.692814	0.0301208496191056	23.0011464298985	4.53974390706583e-117	3.14655e-115
TAPT1	1267.01397439611	-0.833101	0.0362781058654664	-22.9642807197687	1.06094244475002e-116	7.3279e-115
RAB42	27.9832201314634	2.68439	0.116918297048985	22.9595230516283	1.18365740501055e-116	8.1471e-115
STARD3NL	1461.20915308884	0.816616	0.0356016673970517	22.9375803786419	1.96033284450488e-116	1.34463e-114
GLUD1	9565.80625222938	-1.40598	0.0613452668341809	-22.9190586631512	2.99993569514478e-116	2.05061e-114
C12orf48	62.7226784703692	1.99821	0.0873131193871507	22.8855539663329	6.47133935611362e-116	4.40829e-114
PDK1	264.180926599336	1.61467	0.0705684645601213	22.8808965666507	7.20058434919893e-116	4.88826e-114
CEP68	1224.67369064561	-0.859886	0.0375959172847973	-22.8718010592338	8.86960507663592e-116	6.00076e-114
FLJ90757	1247.99264956951	-1.07898	0.0471754615863002	-22.871620218828	8.90643703844901e-116	6.00518e-114
ZNF248	463.34533504336	-1.19917	0.052435574093016	-22.8693771327187	9.37618048358225e-116	6.30048e-114
ARPC5	2602.61386655647	1.08433	0.0474817425108558	22.8368331570148	1.97533289113338e-115	1.32287e-113
SDCCAG1	919.974342703073	-0.883496	0.0386950193275677	-22.832282643907	2.19206586461027e-115	1.46307e-113
SYNE1	2744.82929791897	-1.44071	0.063122313437056	-22.8241211600518	2.64193757030598e-115	1.75742e-113
LOC646214	106.471687915145	-1.32522	0.058064573951009	-22.8232065976272	2.69777176454117e-115	1.78856e-113
MADD	2272.83872656239	-1.20122	0.0526828661230338	-22.8008797902612	4.49390150741422e-115	2.96942e-113
OSBPL2	1412.28490380507	-0.665591	0.0291977241447943	-22.7959840992377	5.02562214029239e-115	3.30973e-113
ANPEP	128.910553192568	2.59091	0.113669294135146	22.7934299982283	5.32749347583129e-115	3.49692e-113
PHLPP1	3817.17074806906	-1.09202	0.0479173374491235	-22.7895811765441	5.81691195006099e-115	3.80557e-113
GEMIN7	218.716876999345	1.08787	0.0477577822790147	22.7789951946683	7.40700692951434e-115	4.8299e-113
NTNG2	592.163900087283	-1.95484	0.0859022328760024	-22.7565506734041	1.2359441109649e-114	8.03283e-113
LUM	370.17882701019	3.59746	0.158141662429162	22.7483311644591	1.4906449936456e-114	9.65655e-113
LOC650623	125.855492755228	-1.9484	0.0856511994982732	-22.7480229528317	1.50115326733509e-114	9.69295e-113
DNAJC12	338.549240489999	-1.50925	0.0663690328584026	-22.7402720672516	1.79115457069652e-114	1.15279e-112
EZH1	1310.97805858525	-0.828239	0.0364309650441427	-22.7344780826151	2.04388880669358e-114	1.3112e-112
TNRC6B	1102.08711291788	-1.00278	0.0441227302098619	-22.7271605912925	2.41453694966274e-114	1.54398e-112
PNO1	424.694164173169	0.796441	0.0350582799548642	22.7176409749203	2.99886358981904e-114	1.91146e-112
SATB1	1735.07062716839	-1.57392	0.0693021616977984	-22.7109412461881	3.49281089605182e-114	2.21917e-112
FAM155A	634.358569567055	-2.51522	0.110771081503146	-22.7064462010949	3.86894017181301e-114	2.45029e-112
SPTBN2	2146.17316850618	-2.14787	0.0945980379318751	-22.7052324493755	3.97725989558155e-114	2.51087e-112
YIPF1	446.968226612678	1.03198	0.0455075909846293	22.6771301914209	7.53455856812029e-114	4.74151e-112
KIAA1147	2575.82166635652	-1.11794	0.0493142264889124	-22.6696793793205	8.92416595899318e-114	5.59822e-112
GOLGB1	2475.68698772227	-0.819333	0.0361429977030357	-22.6692046342312	9.02091654055425e-114	5.64106e-112
ADPGK	710.268571740481	0.847553	0.0374065610821347	22.6578789007217	1.16665407722755e-113	7.27251e-112
CANT1	982.239874845059	0.82297	0.0363363722829416	22.648647763222	1.43858674068321e-113	8.93953e-112
HEXB	1077.90915904192	1.30743	0.0577313579214456	22.6467299340061	1.50257447701565e-113	9.30798e-112
C17orf42	146.910189521728	0.869136	0.0383851795673978	22.6425011215464	1.65388292769825e-113	1.02134e-111
TNR	2422.62632022441	-3.57435	0.157893796520076	-22.6376842707124	1.84483842208516e-113	1.13572e-111
EWSR1	4505.63105410097	-0.600275	0.0265655772234423	-22.5959868806881	4.74594807433882e-113	2.91266e-111
HIP1R	4508.55482128593	-2.03184	0.0899211759669843	-22.5957642356497	4.76993124965823e-113	2.91834e-111
MED8	441.808945963824	0.832194	0.0368442001068486	22.5868257689642	5.83957227600674e-113	3.56178e-111
VPS13D	3246.01506856332	-1.56625	0.0693580495799209	-22.5821546824985	6.49061757681199e-113	3.94673e-111
AKAP11	2587.58691808636	-1.18917	0.0526757447793789	-22.5753805853768	7.56556707132923e-113	4.58631e-111
ZNF37A	438.753674065693	-1.08035	0.047861844468703	-22.5722687296789	8.11724739346895e-113	4.90574e-111
PAR-SN	221.835618663412	-1.33823	0.0593010416592978	-22.5666639381307	9.21410654136548e-113	5.55171e-111
NSUN6	289.42069183943	-1.31246	0.0581775346400284	-22.5595613461798	1.08190208488482e-112	6.49895e-111
MN1	728.339343924412	-2.11005	0.0935344230385113	-22.559084264961	1.09363211962226e-112	6.54957e-111
LOC550643	418.062837508642	0.729139	0.0323325756169785	22.5512072981217	1.306717651988e-112	7.80213e-111
PDZD4	4753.72545833613	-1.82451	0.0809543505704012	-22.5375297818185	1.77975138114847e-112	1.05946e-110
SLC12A6	988.993886211887	-1.01204	0.0449188200268372	-22.530357481299	2.09260760022202e-112	1.24197e-110
KIF13A	1338.27177795878	-1.43137	0.0636315551604427	-22.4946155680776	4.68624549660977e-112	2.773e-110
VPS29	934.633474279471	0.799105	0.0355278466815433	22.4923674473075	4.92980467552781e-112	2.90844e-110
ZNF552	51.5570278169971	1.02493	0.0455750154180481	22.4888411118593	5.33754046835018e-112	3.13965e-110
TAGLN2	3787.19877964526	2.32763	0.10353351151159	22.481895865829	6.24161551294897e-112	3.66058e-110
ATOH8	1495.24694076513	-2.34671	0.104558929992944	-22.4438673111041	1.46898425714981e-111	8.56461e-110
CASKIN1	811.021403438777	-2.18605	0.0974354566686861	-22.4359196691694	1.75640340910089e-111	1.02103e-109
MPV17	1065.10100123495	0.722459	0.0322048299223095	22.4332349414406	1.86566606875146e-111	1.08138e-109
HAUS1	301.672127620843	1.16329	0.0518658957383471	22.4287742706515	2.06240656604008e-111	1.19193e-109
ZMIZ1	5449.20706771954	-1.21251	0.0540732251923786	-22.4234484971612	2.32459649203946e-111	1.33955e-109
OPHN1	2031.24003037534	-1.78275	0.0795185645516993	-22.4192977898307	2.55179089278895e-111	1.46621e-109
GBAS	3414.3378089436	1.88282	0.0839993968508287	22.414736189193	2.82711169759825e-111	1.61971e-109
PPIL5	117.190486151639	1.35198	0.0603206741545086	22.4131831455829	2.92745797682874e-111	1.67236e-109
CSTF2T	1079.05554339845	-0.763837	0.0340971799954849	-22.4017520502484	3.78401075963328e-111	2.15547e-109
NF1	2820.31541917661	-1.11773	0.0499370960739535	-22.3828185257401	5.78687009933105e-111	3.28691e-109
DNAJB12	1001.30891856783	-0.664471	0.0296918352287059	-22.3789067500567	6.31744327217084e-111	3.57802e-109
SCG3	10629.6737129176	-2.27127	0.10151238336511	-22.3743347349871	6.9993993692931e-111	3.95297e-109
GLRX	476.794975416523	1.59676	0.0714498371339521	22.3479266222218	1.26482125822067e-110	7.12288e-109
ID2B	9.25474181851219	-2.20859	0.0988451097896394	-22.3439093204543	1.38386481448968e-110	7.7712e-109
SRGAP3	1613.23917025639	-1.24193	0.0556166714555962	-22.3302542266423	1.87855716246481e-110	1.05194e-108
ADARB2	189.72744630435	-2.9479	0.132075889326326	-22.3197548578596	2.37588713678611e-110	1.32668e-108
UNC80	1123.36069505429	-2.14904	0.0963075980787683	-22.3143708261079	2.67986646442823e-110	1.49222e-108
RABEP1	2304.78152534975	-0.638735	0.0286295235112975	-22.3103497754642	2.93194374354876e-110	1.62801e-108
CENPL	127.286860451594	1.23634	0.0554398231016093	22.3005381094047	3.65084004700766e-110	2.02153e-108
DCUN1D5	333.367391670263	0.725042	0.0325127939213388	22.3002132317858	3.67743939781012e-110	2.03058e-108
CCNB1	430.733952953635	2.13769	0.0958838560013902	22.2945563382311	4.17286695224109e-110	2.29774e-108
PSMD8	2430.33816524901	0.959034	0.0430191469484838	22.2931947973132	4.30173388719094e-110	2.36214e-108
SLCO1A2	1288.1381650723	-2.59081	0.116288493863644	-22.279188007221	5.88144315660234e-110	3.22066e-108
GRIPAP1	1424.90463440635	-0.866645	0.0389000156134451	-22.2787905200025	5.93386368791191e-110	3.24041e-108
SLPI	162.926398646356	3.33079	0.149515883375709	22.277187025412	6.15010942403736e-110	3.34928e-108
MUM1	2491.63145559512	-0.884847	0.0397213970395464	-22.2763357024625	6.26809609630015e-110	3.40418e-108
PCOLCE	607.931097696461	3.12867	0.140492459885204	22.2693308479455	7.3287418645585e-110	3.96933e-108
BOD1	916.954929049716	0.793721	0.0356562000494045	22.2603810348424	8.94836222070055e-110	4.83333e-108
COMMD7	1101.33978540685	0.84591	0.0380113987394165	22.2541202882956	1.02892297674968e-109	5.54248e-108
ITPK1	4712.73683772311	-1.21895	0.0547780781438382	-22.2524328542028	1.06837527985791e-109	5.7394e-108
SERPINH1	1519.65209832939	2.22089	0.0998430254266348	22.2438499824177	1.29366108063434e-109	6.93088e-108
SAFB2	2367.84266792625	-0.882791	0.0397122464719306	-22.2296817053899	1.77387693227336e-109	9.47805e-108
NRG3	357.303736339465	-2.27898	0.102593992534376	-22.213567210572	2.53953253979825e-109	1.35326e-107
ACADSB	672.662302700896	-1.12	0.0504220342964552	-22.2125189840539	2.59947974203066e-109	1.38149e-107
NUP54	527.204733097799	0.666518	0.03002031698222	22.2022245820958	3.26867477142729e-109	1.73249e-107
FAM21C	1233.35049423293	-0.835763	0.0376485321551779	-22.1990904597495	3.50469961968189e-109	1.85263e-107
ZMYND17	87.7143380262151	-1.26397	0.0569383890335268	-22.198931039653	3.51714977038048e-109	1.85427e-107
GPR39	36.9539237484079	2.28852	0.103097652543233	22.1975752881415	3.62482888061911e-109	1.90597e-107
NOG	259.748093852829	-2.59046	0.116704183886448	-22.1968244271274	3.6858744035161e-109	1.93294e-107
CASP4	210.475493577055	2.20289	0.0992776907999069	22.189161772286	4.3706376611935e-109	2.28599e-107
ARPP21	734.992832606204	-2.2784	0.102740812087227	-22.1761612628831	5.83502484744679e-109	3.04389e-107
LOC728758	38.5945890898725	0.939341	0.042382893872904	22.1632137254081	7.77958543585753e-109	4.04342e-107
ZFYVE20	2156.92309971606	-0.942094	0.042507242933581	-22.1631425688131	7.79188887502832e-109	4.04342e-107
ARPC2	3231.6056008325	0.658352	0.0297081008957332	22.1606845699166	8.22902655615721e-109	4.25911e-107
SLITRK5	424.273061846584	-2.00878	0.0906726889180185	-22.1541491958364	9.51403900956469e-109	4.91137e-107
KIAA0649	974.369760116933	-0.908458	0.0410168893759176	-22.1483889929011	1.08116395902328e-108	5.56673e-107
FAM168B	4630.60459025748	-0.719242	0.0325271594150471	-22.112053268914	2.42005695554581e-108	1.24282e-106
C20orf30	2048.04920973448	0.893578	0.040429353150808	22.1022046872883	3.01005583451413e-108	1.54182e-106
KIAA2026	900.308657851139	-1.08054	0.0488958199630224	-22.0989137396462	3.23762072465541e-108	1.65411e-106
NAMPT	3194.31519318755	2.28355	0.103350423959059	22.0952312386926	3.5126726331229e-108	1.79002e-106
RUSC2	1782.55596324718	-1.26479	0.0572430390372412	-22.0950946973229	3.52330771494441e-108	1.79083e-106
SSR3	2316.89098640665	0.945771	0.0428351373832936	22.0793334430013	4.99397973608051e-108	2.53186e-106
RFC2	667.967792867571	1.10023	0.0498332632965852	22.0781713307719	5.12404180903697e-108	2.59117e-106
CLK2P	13.7708118709212	0.682189	0.0309220756635746	22.0615630720901	7.39818780712594e-108	3.73166e-106
RNFT1	216.922743346163	1.05478	0.0478221798408873	22.0563710568907	8.29787936346423e-108	4.17484e-106
PLCB1	1399.51033521768	-1.87139	0.0848599289054674	-22.0527189386967	8.99537637876801e-108	4.51431e-106
CD58	166.190677286446	2.12764	0.0965099208880726	22.0458316257255	1.04738540095411e-107	5.24301e-106
FAM109B	89.7191064134978	1.82557	0.082815378244121	22.0438939848749	1.09318945431191e-107	5.45851e-106
ACTR3	2653.78290738082	0.767022	0.034800917054185	22.0402921479853	1.18371085188235e-107	5.89565e-106
DUSP26	887.715992621465	-2.07553	0.0942164460789249	-22.0294296807027	1.50455655480689e-107	7.47489e-106
ZNF25	803.385491107422	-1.17819	0.0535169485092108	-22.0152021855212	2.05950160148385e-107	1.02064e-105
THRA	8902.43344631279	-1.33085	0.0604631213377174	-22.0109220807846	2.26341755701011e-107	1.1189e-105
GBAP1	466.454597574738	-1.13463	0.0515650346563452	-22.0039106750861	2.6418939880898e-107	1.30274e-105
MRPS17	346.458586750442	1.85082	0.0841292572661205	21.9997454904294	2.89598789054168e-107	1.4245e-105
ANKRD19	61.5641964461776	-1.90125	0.086474187457264	-21.9863005738349	3.89474994331481e-107	1.91103e-105
ANKRD12	1068.50272520797	-0.929285	0.0422727834952999	-21.9830528941129	4.18361533888401e-107	2.0477e-105
ACVR2B	585.490764041346	-1.40065	0.0637342112070823	-21.9763681987794	4.847224818924e-107	2.36666e-105
TJP2	4729.04871355092	-1.92211	0.0874650009407045	-21.9757915189184	4.90917368441529e-107	2.39102e-105
RARS	638.196433866891	0.634868	0.0289041060872161	21.9646442062885	6.2746632884344e-107	3.04859e-105
FAIM2	7549.06408137433	-1.82621	0.083253321837323	-21.9355285084279	1.19046955620603e-106	5.76985e-105
PDIA3P	1308.99638858413	0.938799	0.0428096231624552	21.9296174748848	1.35562199956733e-106	6.55427e-105
TMEM136	719.116876357756	-1.01898	0.0464796826194595	-21.9232286799089	1.55991913817562e-106	7.52367e-105
SGSM1	418.285531535199	-2.41049	0.109952579091016	-21.9229783533802	1.56852124160079e-106	7.5468e-105
KIF1A	13442.4678400897	-1.72593	0.078794806775548	-21.9041609804735	2.3710769763162e-106	1.13531e-104
LOC493754	470.226991922727	0.695469	0.031762448061963	21.8959580984651	2.83874170000696e-106	1.35596e-104
PELP1	1969.24413503619	-0.812209	0.0370968681985594	-21.8942649333976	2.94618154392144e-106	1.4039e-104
FAM133A	145.920577129513	-2.52809	0.115517058198721	-21.8850102848652	3.60929290784385e-106	1.71576e-104
ZDHHC22	2493.13838522719	-2.40103	0.109743348664076	-21.8786189349991	4.15227797442535e-106	1.96915e-104
ORC5L	353.019599085826	0.799417	0.0365414264496343	21.8769942581036	4.30284062198166e-106	2.03569e-104
SLTM	1621.91480610975	-0.632263	0.0289121456221065	-21.8684304428284	5.19127427563087e-106	2.45016e-104
MTFR1	234.751468904319	0.953794	0.0436178003790327	21.8670844874819	5.34666772803903e-106	2.51751e-104
SRPRB	1081.19999775675	0.837512	0.0383083416811839	21.8623996145279	5.92464298736238e-106	2.78304e-104
ATP5J2	1959.97612416241	1.15475	0.0528218719937029	21.8612195879883	6.07979937871517e-106	2.84917e-104
C22orf46	877.561595651227	-1.23159	0.0563645464484925	-21.8505069319825	7.68748869440894e-106	3.59408e-104
CDH20	1091.26939080891	-1.87963	0.0861160216294125	-21.8267733855837	1.29226915409286e-105	6.02745e-104
GBF1	1931.63991047282	-0.85545	0.0392013060650818	-21.8219781759751	1.43515228957123e-105	6.67817e-104
KIF5B	3963.32647447825	-0.811712	0.0372457256127722	-21.7934219062132	2.67867305307232e-105	1.24354e-103
FAM176B	130.000166940916	1.93869	0.0890494058943171	21.7710012655421	4.36980199226051e-105	2.02389e-103
ZBTB4	3005.17903940653	-0.669611	0.0307575599075733	-21.7706257938908	4.40574422525259e-105	2.03578e-103
GRIN3A	265.439705229241	-3.27294	0.1503414833583	-21.7700383891939	4.46256654825817e-105	2.05724e-103
UBTF	3149.86724168478	-0.635578	0.0292026854604626	-21.7643531366349	5.05175727791482e-105	2.32346e-103
BTRC	1015.63510772102	-1.02155	0.0469416925974855	-21.7621206219576	5.30380802369547e-105	2.43374e-103
RSF1	932.379655076989	-1.11534	0.0512686488223068	-21.7547761680199	6.22494815250305e-105	2.84982e-103
CEP170L	5.72333381197652	-3.42972	0.157672778707201	-21.7521138885984	6.59690589186114e-105	3.01314e-103
KIAA1409	694.089322001076	-2.52202	0.115990704086776	-21.7432993237367	7.99407721476764e-105	3.64291e-103
C5orf15	1045.9192086415	0.844475	0.0388455666143226	21.739279718608	8.72573257704381e-105	3.96721e-103
HEBP2	332.186146735398	1.33613	0.0614635385791271	21.7385216768072	8.87102322162137e-105	4.02403e-103
TMED8	528.936227881832	-0.868264	0.0399573878086886	-21.729757502579	1.0736761296836e-104	4.85924e-103
TRIAP1	450.110169914722	0.943196	0.0434133599684993	21.7259417239487	1.16669147086244e-104	5.26818e-103
SLC30A5	619.155221501503	0.675678	0.0311140801091369	21.7161593402998	1.44354813402017e-104	6.50351e-103
RAB5B	5200.92139234198	-0.633706	0.0291825967649818	-21.7151883758625	1.47437435974684e-104	6.62733e-103
GRAMD1B	290.686563502553	-1.97098	0.0907694002804098	-21.7140952315915	1.50986629909317e-104	6.77151e-103
ANXA2P2	1088.01037663948	2.77642	0.127908568292528	21.7062769788681	1.78982067250979e-104	8.00894e-103
GRID1	904.775882239961	-1.45414	0.0669944450566562	-21.7053851985195	1.82487807710863e-104	8.14742e-103
PSMA7	2667.28245209494	0.836003	0.0385191835830577	21.7035508936536	1.89915670241831e-104	8.46e-103
TMEM165	1013.00571277925	1.28719	0.0593436787836266	21.690412120224	2.52713103954811e-104	1.12321e-102
CHD2	2443.69415747632	-0.875977	0.0403918602474886	-21.6869807876899	2.72280705949246e-104	1.20748e-102
ZNF530	62.2120659970572	1.31552	0.060666151494013	21.6845602839122	2.86986500548371e-104	1.26985e-102
HSFX2	42.3308552563877	-1.29416	0.0596860963961049	-21.6826966348836	2.98846910385256e-104	1.31939e-102
TM9SF3	3399.20611301464	-0.7035	0.0324640689377836	-21.67011145139	3.92804136615697e-104	1.73035e-102
C1orf84	5.81076243970556	1.00092	0.0461900253691734	21.6695974918845	3.97212798309115e-104	1.74589e-102
ERI1	364.76747647981	1.06261	0.049037648794349	21.6692923529247	3.99853554787125e-104	1.75361e-102
SNRNP40	597.451682310545	0.918326	0.0424090245012664	21.6540147996214	5.57096091187307e-104	2.43782e-102
RAPGEF2	1627.65820336454	-1.08558	0.0501395552162118	-21.6512483030667	5.91562238371521e-104	2.58294e-102
RASL10A	491.596456326055	-2.66389	0.123074950176028	-21.6444377425044	6.85750681358747e-104	2.98761e-102
CASP6	110.748844252395	1.45268	0.0671735211434271	21.6257824685041	1.02760039894251e-103	4.46713e-102
MYCBP2	1973.59845800479	-1.40798	0.0651174618273005	-21.6221550774403	1.11163511085428e-103	4.82187e-102
CEP250	990.958076657962	-0.849014	0.0393078182803546	-21.5991135297402	1.83095220288873e-103	7.92466e-102
TBCA	1338.89357086424	0.847414	0.0392366663857381	21.5975121131643	1.89552887262938e-103	8.18629e-102
LEPRE1	420.708026324375	1.34749	0.0624056313142119	21.5923802696549	2.11817825384693e-103	9.12797e-102
COL6A3	744.710769060219	4.05614	0.187861453959522	21.5911506263303	2.17529281529228e-103	9.35376e-102
DHX38	1728.47852156046	-0.694723	0.0322096682873349	-21.5687682669065	3.52967736006382e-103	1.51448e-101
LGALS1	3437.88355969009	2.05693	0.0953675936982329	21.5684663502739	3.55278687272395e-103	1.5211e-101
SMAGP	36.4466495098312	2.0619	0.0956174968282142	21.564011708731	3.91184007932292e-103	1.67122e-101
CDC42BPB	3695.26431824895	-0.874552	0.0405578484958964	-21.5630854429939	3.99092973638609e-103	1.70134e-101
PMM2	302.225353616185	0.949985	0.0440663290570243	21.5580596205324	4.4487178910307e-103	1.89242e-101
TSC1	1352.04401947334	-0.875036	0.0405963419715578	-21.5545477110512	4.79935700527986e-103	2.03721e-101
TERF2	1145.43047745983	-0.598242	0.0277694438971339	-21.5431576274752	6.13770873571377e-103	2.59974e-101
SLC35A2	435.48812773187	0.642623	0.0298417509685932	21.5343688774101	7.41983346100123e-103	3.13611e-101
CCDC85A	249.430161475701	-2.25628	0.10479799296959	-21.5298120917538	8.18648364106219e-103	3.45278e-101
EXT2	1432.44739358728	0.714815	0.0332018671102216	21.5293739722266	8.26423572476793e-103	3.47817e-101
PTPRT	1052.67521360846	-2.87804	0.133723401538339	-21.522303245006	9.62599895422264e-103	4.04272e-101
SUFU	703.861254693402	-0.869088	0.040385232735182	-21.5199333313684	1.01308021820506e-102	4.24573e-101
SIRT1	575.515933142976	-0.954386	0.0443877988402529	-21.501093580654	1.52062314686612e-102	6.35935e-101
LOC727896	19.248858639173	-1.22079	0.0567799559486768	-21.5003683462238	1.54457203590906e-102	6.44591e-101
SMC3	1412.918973594	-1.05454	0.0490775449859667	-21.4872645630437	2.04828780191011e-102	8.53009e-101
ITGB3BP	147.330938581014	1.34813	0.0627513578043506	21.4836122957542	2.21586766459482e-102	9.20863e-101
ARHGAP32	1846.69054167765	-1.30014	0.0605501469410021	-21.4720912310108	2.83949404996868e-102	1.17756e-100
ASB13	826.255222851717	-1.10704	0.0515627500487862	-21.4697255611597	2.98777413252693e-102	1.23646e-100
SPIRE1	2829.42057354056	-1.04027	0.0484776823661096	-21.4587368524862	3.78445774444267e-102	1.5629e-100
MED31	206.915333311037	0.961229	0.0448048741087557	21.4536617824073	4.22082177497168e-102	1.73949e-100
ZNF410	934.835625897083	0.777326	0.0362519594196922	21.4423084981629	5.38739506560461e-102	2.21565e-100
BCL3	200.611794645803	1.885	0.0879168600311482	21.4406860667585	5.57852652874594e-102	2.28951e-100
ACTL6A	654.891785993916	1.02205	0.047730921728094	21.4127626409918	1.01607251729905e-101	4.15291e-100
RAP2B	627.563095701055	0.840815	0.0392690069696816	21.4116664400174	1.04025698807298e-101	4.24301e-100
CD63	10868.8580339405	1.35956	0.0635003044653177	21.4102761763978	1.07175697344716e-101	4.36251e-100
C7orf30	425.978005623548	0.880259	0.0411371993175716	21.398125105463	1.39089654740353e-101	5.64995e-100
BAZ2B	976.488676617982	-0.991044	0.0463166484376363	-21.3971345979064	1.42075602500785e-101	5.75944e-100
TCEAL3	1427.96341865379	-0.911219	0.0426121093557469	-21.3840485427714	1.88083668707775e-101	7.60894e-100
MFSD2B	12.2144225988975	-2.29078	0.107172067010058	-21.374742823797	2.29584450978492e-101	9.26895e-100
PSMA5	1052.07088888702	0.867264	0.0405843894550103	21.3694039636185	2.57397652462599e-101	1.03707e-99
SSTR1	277.305198105638	-3.55416	0.16634887215103	-21.3657191458013	2.78531023556535e-101	1.11994e-99
COPB1	1921.73495262165	0.663117	0.0310699082098997	21.3427501470278	4.55358849871138e-101	1.82724e-99
MTMR7	321.767953586484	-1.97083	0.0923675802811463	-21.3368184925048	5.16948249589493e-101	2.07019e-99
FXR2	1483.59701319005	-0.715547	0.0335508170259524	-21.3272504098106	6.34283504735038e-101	2.53496e-99
ABCA3	4236.88198579696	-0.98858	0.0463608513400316	-21.3235928335314	6.85854938523291e-101	2.73555e-99
IL10RB	488.234810225973	0.978302	0.0458813663985566	21.322426886652	7.03158328349787e-101	2.79894e-99
KRT10	491.459454365932	0.987333	0.0463309424920536	21.3104509223578	9.08165261394802e-101	3.60773e-99
SNAPIN	917.602513929871	0.781113	0.0366728537655674	21.299487029005	1.14771024994663e-100	4.55021e-99
MTA3	1276.55535007039	-0.811549	0.0381214049218097	-21.2885369973921	1.44983674763473e-100	5.73655e-99
TMEM45A	257.088635466855	1.80956	0.0850065854928373	21.2872712110568	1.48952324828625e-100	5.88184e-99
SEMA4G	284.325323699626	-1.29947	0.0610512270538408	-21.2848817371275	1.56741911526859e-100	6.17713e-99
LPHN1	3615.76002809683	-1.07629	0.0506050533663597	-21.2683878367306	2.22807260783187e-100	8.76331e-99
SSBP3	728.267265102496	-1.14179	0.0536953508495339	-21.2643135641147	2.43019758726595e-100	9.53937e-99
DPYD	413.064210734021	2.39819	0.112796485613497	21.2611957159038	2.5971445716172e-100	1.01745e-98
MED18	228.178400517281	0.906365	0.0426321894236305	21.2601019973122	2.65838018672131e-100	1.03939e-98
HLF	919.929653367634	-2.01277	0.0947703124510043	-21.2384148074276	4.21888056865202e-100	1.64628e-98
DOPEY1	957.795603873164	-1.01901	0.0480484605767588	-21.2079671028506	8.0622737191005e-100	3.13985e-98
JPH3	1174.97966836646	-2.80878	0.132521891610493	-21.1948510279181	1.06535248058343e-99	4.14088e-98
UBE2F	582.204284144351	0.70245	0.0331495063050412	21.1903531257073	1.17214952997179e-99	4.54707e-98
SHC1	1247.70214729346	1.43697	0.0678416302672323	21.1811846686912	1.42405856244196e-99	5.5135e-98
NLGN2	4592.63252242055	-1.03766	0.0489957375827576	-21.1785406075266	1.50626952027621e-99	5.82043e-98
TMEM170B	1131.20191566578	-0.996506	0.0470560352061964	-21.1770073575958	1.5560942219702e-99	6.00126e-98
ZNF652	1169.41981479052	-0.772885	0.036525370124335	-21.1602126008335	2.22218403456773e-99	8.55347e-98
RUFY3	4218.48040486793	-0.94948	0.0449025660697434	-21.1453460268394	3.04548322293053e-99	1.16997e-97
USP47	2629.93597699251	-0.748013	0.0353950771217746	-21.1332446250571	3.93552627416774e-99	1.50897e-97
RPL13A	9290.51904688102	-1.33582	0.0632170541787826	-21.1307251005573	4.15123494993351e-99	1.58861e-97
C2orf85	435.587088354032	-3.15223	0.149277307997111	-21.1166022307885	5.59793755478125e-99	2.13811e-97
ARFGAP2	2652.67473514538	-0.703874	0.0333484489313733	-21.1066438124914	6.91094383995407e-99	2.63453e-97
OCIAD2	437.226337670923	2.93288	0.138980825246041	21.1027961627914	7.49691266494775e-99	2.85242e-97
PATZ1	1730.76839980468	-0.907221	0.0430002936925928	-21.098011746234	8.29514290316386e-99	3.15009e-97
CBX7	1509.41955755632	-1.61174	0.0764020764643409	-21.095464716675	8.75411925360961e-99	3.31803e-97
FASN	5614.57599210158	-1.2697	0.0601891982941865	-21.0951789614028	8.80716809856024e-99	3.33177e-97
PCBP3	260.153664539128	-2.15025	0.101961968855617	-21.0887710831958	1.00847381765488e-98	3.80781e-97
GABRG1	668.457228349362	-3.31538	0.15728479233184	-21.0788449525017	1.24382019937083e-98	4.6786e-97
PRDM11	39.4678214698491	-1.23874	0.0587668245512902	-21.0788745706535	1.24304216495073e-98	4.6786e-97
C9orf21	122.060562365001	0.936358	0.0444260047983001	21.0767993891189	1.29874717325242e-98	4.87596e-97
C1GALT1C1	321.322922965138	0.764081	0.0362616763960161	21.0713229543253	1.45800566289037e-98	5.46352e-97
CLEC16A	1183.34804341579	-0.866047	0.0411151724961067	-21.0639257061728	1.70448245183521e-98	6.37509e-97
MRPL39	331.616790361497	0.650529	0.0308994781249094	21.0530721904989	2.14327142591693e-98	8.00114e-97
PSMD14	1375.81934945947	0.614954	0.0292177731892936	21.0472453646618	2.42362546643301e-98	9.03074e-97
ASH1L	2388.75692089934	-0.997583	0.0474087792574421	-21.0421607802726	2.69799429761685e-98	1.00342e-96
CNNM2	220.428859048504	-1.11668	0.0530785618886344	-21.038265012957	2.92899906578598e-98	1.08729e-96
C6orf115	152.178255032245	1.53821	0.0731272290337138	21.0347311636075	3.15556575420142e-98	1.16921e-96
DSCAML1	1102.70017818689	-2.43667	0.115846681823228	-21.0335450385174	3.23546629153291e-98	1.19658e-96
GIGYF2	1736.71325607414	-0.717704	0.0341257284089944	-21.0311617240722	3.40216699042142e-98	1.25589e-96
BRWD1	1583.11639749308	-0.736702	0.035046082522554	-21.0209643021513	4.21777203387817e-98	1.55119e-96
CASP3	765.448464784836	1.10784	0.0527016139229135	21.0209738295118	4.21692550422088e-98	1.55119e-96
CRTC1	1481.13330157159	-1.12579	0.0535638030271437	-21.0177853661725	4.50990839984728e-98	1.65555e-96
C19orf10	1099.92937130849	0.989611	0.0471298722350055	20.9975400484359	6.90705284990476e-98	2.53084e-96
PELI2	560.440476645017	-1.19371	0.0569200827828191	-20.971710280629	1.18911734675898e-97	4.34905e-96
PLEKHM3	673.544478040828	-1.22833	0.0586583262570814	-20.9404511058174	2.29278223779494e-97	8.35475e-96
TRAPPC2P1	121.884634957212	0.882875	0.0421784718471871	20.931887280876	2.74413777477591e-97	9.98111e-96
PHACTR3	1365.99104190634	-1.96553	0.0939364242189337	-20.9240878968573	3.23187778060336e-97	1.17336e-95
LSM10	617.701462097983	1.05644	0.0505064642041208	20.9170056504929	3.74928363824325e-97	1.35872e-95
DPM1	383.075087064496	0.628704	0.0300579617624231	20.9163981846435	3.79733644297147e-97	1.37362e-95
SHANK2	570.984642545459	-2.59418	0.124072245714609	-20.9086223048258	4.46952973786533e-97	1.61383e-95
CD276	1636.16529053118	1.37785	0.0659576228790595	20.889857552533	6.6216597901918e-97	2.38657e-95
LRRC8A	7385.69296824322	-1.37293	0.0657244053285416	-20.889192168033	6.71455351029036e-97	2.41566e-95
LOC92973	254.699323384789	-1.48908	0.0712949081205463	-20.8861575377033	7.15497796125162e-97	2.56944e-95
ALG3	484.922798545432	0.829244	0.0397082192867937	20.8834425643222	7.57337962209396e-97	2.71478e-95
BOLA3	196.567239683586	0.99895	0.0478677639935741	20.8689473400147	1.02567470476723e-96	3.67003e-95
CTTNBP2	1241.36477688253	-1.64419	0.0788366145840849	-20.8556734300386	1.35379051454793e-96	4.83535e-95
BAGE2	3.6299939539259	-4.11452	0.197293847662642	-20.8547646307153	1.37975373996843e-96	4.91922e-95
HUWE1	6187.99881244415	-0.808589	0.0387908410130897	-20.8448454759236	1.69755852484126e-96	6.04142e-95
TSNARE1	272.423762840578	-1.02705	0.0492974626336707	-20.833690236486	2.14296619393365e-96	7.61291e-95
TUBA1A	42709.9572705115	1.1677	0.0560553038338855	20.831225686179	2.25613088035003e-96	8.00059e-95
ELFN2	1751.5057333479	-2.65015	0.127241596677167	-20.8277084690261	2.42803234161775e-96	8.5948e-95
ORMDL2	278.665814320549	0.987467	0.0474187128239023	20.8244190030448	2.60060744638191e-96	9.18928e-95
CCDC88A	3802.82428326196	-0.837374	0.0402151921566714	-20.8223365230662	2.71613216196197e-96	9.58041e-95
CLP1	190.230855001342	0.631896	0.0303620805104041	20.8120159898485	3.36876677777125e-96	1.18613e-94
DEPDC5	374.816079285951	-0.850903	0.0408857627176408	-20.8117292167292	3.38897914238903e-96	1.19106e-94
SMAD7	411.531542781355	-1.11276	0.0534682940537645	-20.8116472907557	3.39477564366999e-96	1.19106e-94
SPAG4	27.7505002628408	3.2747	0.157516340563752	20.7895678697707	5.37930764173779e-96	1.88399e-94
EVI5L	1521.81795025985	-0.977651	0.0470279522460414	-20.7887257991782	5.47452724454403e-96	1.91396e-94
CHGB	2297.95924950567	-2.71942	0.130859045517011	-20.7813284113046	6.38668339023112e-96	2.22893e-94
COPS3	1109.19967442789	0.638599	0.0307388044283363	20.7750260039942	7.28246619418967e-96	2.53709e-94
TIMM8B	679.590396089541	1.13182	0.0544931961169376	20.7699856383562	8.08824785868957e-96	2.81287e-94
FBXO22OS	32.1677768831184	1.11397	0.0536374882265774	20.7684313376903	8.35423181626669e-96	2.90028e-94
TMCC2	1024.824044847	-1.566	0.0754125007467884	-20.7658326590858	8.81857133683378e-96	3.05613e-94
SSBP1	1089.37935582531	0.772796	0.0372209860085425	20.762360372904	9.47943979312389e-96	3.27942e-94
SLC39A1	2061.92871623373	0.898275	0.0432692690266838	20.7601075283202	9.93441576704874e-96	3.43083e-94
C7orf41	12336.2072016023	-1.80563	0.0869901164644807	-20.7567149439623	1.06610020142542e-95	3.67536e-94
NDUFA4L2	571.900395881567	1.75896	0.0847920310642925	20.744344942245	1.37889823805763e-95	4.74547e-94
FUT9	1227.80637931236	-2.06001	0.0993154889189763	-20.7420687969251	1.44572160967804e-95	4.96682e-94
MRPL32	584.153945373114	0.836918	0.0403740787769219	20.72908757773	1.89345806950256e-95	6.49377e-94
DLL1	1483.44814263781	-1.99363	0.0962077854045343	-20.722118492383	2.18841607184989e-95	7.4924e-94
KCNJ11	514.888139831095	-2.63149	0.126991787978246	-20.7217461488161	2.20540593910607e-95	7.53755e-94
REXO2	437.269307290972	1.07511	0.0518916553673801	20.7183351603899	2.36730286331032e-95	8.07694e-94
SGMS1	609.647259054774	-1.01192	0.0488978567676066	-20.6945246206596	3.88035697952308e-95	1.32165e-93
MAPK8IP3	3528.0684042617	-1.18097	0.057083408768952	-20.6884119997372	4.4048240257109e-95	1.49772e-93
BOD1L	1275.07803651958	-0.919189	0.0444401847239568	-20.6837271720481	4.85416164258688e-95	1.64767e-93
POLE3	1522.78576203293	0.697883	0.033801235415184	20.646670620384	1.04583667461075e-94	3.53782e-93
GEMIN6	148.565933961595	0.866692	0.0420471748840694	20.6123627410478	2.12596858440022e-94	7.1794e-93
SEC24D	414.182113124793	1.48407	0.0720573607323921	20.5956733408615	3.00087058242966e-94	1.01167e-92
GLT25D1	1339.64937366097	1.12723	0.054763415615356	20.5835497404615	3.85398908925848e-94	1.29707e-92
JAKMIP3	164.055739951686	-2.10443	0.102274996398663	-20.5762263575101	4.48248388231369e-94	1.50604e-92
RABL5	725.261286286005	1.007	0.0489417003658155	20.5755193111642	4.54832770908166e-94	1.52558e-92
TBC1D14	3977.85818470589	-0.753427	0.03662082207938	-20.5737190544162	4.72036589287992e-94	1.5806e-92
POU6F1	1008.49947558119	-0.954624	0.0464042260967649	-20.571920811785	4.89869203832586e-94	1.63755e-92
NOX4	52.7350302983791	2.82622	0.137416110700559	20.5668565429192	5.43784154358584e-94	1.81472e-92
RASGRF1	742.930046800868	-2.87266	0.139755641812658	-20.5549023898575	6.95700309281964e-94	2.31779e-92
HDAC11	1241.13687979261	-1.3575	0.0660585395701846	-20.5499175404744	7.70940388836625e-94	2.56415e-92
KCNJ9	577.150819680034	-2.36281	0.115003857687483	-20.5454428212829	8.45368735570737e-94	2.80699e-92
NANP	134.450026771401	0.988233	0.0481063772202592	20.5426685263326	8.95070587900699e-94	2.96705e-92
KPNA2	1458.35865266204	1.23571	0.0601691626860087	20.5372199236868	1.00132620416764e-93	3.31374e-92
DOK6	417.452090122725	-2.52227	0.122907364288875	-20.5217252874027	1.37736636918218e-93	4.55059e-92
LRRC8E	9.75284656468558	3.27881	0.159792166869818	20.5192432663903	1.44951049009096e-93	4.78097e-92
KDELR1	2095.62320861642	1.00882	0.0491675583343448	20.5180201993993	1.48643538604735e-93	4.89462e-92
CELF2	2920.03641378576	-1.00036	0.0488050997127972	-20.4970505402911	2.28744311408377e-93	7.51973e-92
P4HB	7344.4931203661	0.909437	0.0443941818748388	20.4855058848752	2.89956329353759e-93	9.51623e-92
MMP11	77.7271053486431	2.7766	0.135575984936731	20.4800218616822	3.24512725924766e-93	1.06328e-91
UBR3	1212.60512652571	-0.81584	0.0398426752621528	-20.4765434131152	3.48530751205122e-93	1.14009e-91
ZNF35	155.21491774613	0.718367	0.0350875436821299	20.4735760555772	3.70416308073441e-93	1.20968e-91
HSP90AB2P	29.7357145915356	-1.7482	0.0854209616973366	-20.4657334122062	4.35086586134206e-93	1.41621e-91
ZDHHC4	1187.22177247824	0.67485	0.0329822438736506	20.4609946894194	4.79500888554905e-93	1.55822e-91
CDKN3	90.54544925519	2.23986	0.109479659775824	20.4591207429099	4.98287868480382e-93	1.61662e-91
LOC284232	11.1476949749856	1.20079	0.0586979288383247	20.4571837830097	5.18478629983825e-93	1.67938e-91
ZCCHC14	1421.73121591446	-0.892523	0.0436307169054116	-20.4563057130041	5.27898476699893e-93	1.7071e-91
AMZ1	217.919100588056	-2.2416	0.109601250530335	-20.4523035746045	5.73042383874061e-93	1.85007e-91
PHF5A	468.863321846338	0.7707	0.0377046653220586	20.440433022438	7.30878466347736e-93	2.35581e-91
TAF3	236.487898148928	-1.07445	0.0525714032991714	-20.4379569612621	7.68911944200967e-93	2.47437e-91
SURF4	3627.14582224891	0.657129	0.0321628613069204	20.4312969899995	8.81297151392323e-93	2.83143e-91
ATP6V1G2	2212.23410305669	-1.84325	0.0902270218080032	-20.429055038459	9.22703123761612e-93	2.95967e-91
PDIA4	2667.41248690071	1.26279	0.0618177678870829	20.4276668183964	9.49308888642243e-93	3.04009e-91
ZNF609	1602.84998571608	-0.98862	0.0484074063055795	-20.4229157316842	1.04629232001887e-92	3.34527e-91
SNX3	4505.17919851319	0.731528	0.0358608501632968	20.3990584910007	1.70466041614783e-92	5.44146e-91
ZC3H7B	3713.94384637677	-0.845382	0.0414506102550078	-20.3949347943345	1.85461691495461e-92	5.91062e-91
EIF3I	2876.87150417949	0.80006	0.0392343328021097	20.3918412535769	1.97568842921755e-92	6.28637e-91
ST13	6003.93060218044	-0.80333	0.0394172706796797	-20.3801511851711	2.50879186583144e-92	7.96984e-91
CKS1B	273.719842743278	1.38534	0.0679902078855225	20.3756065710044	2.75283932700332e-92	8.73113e-91
S100A11	1356.95712597587	2.17294	0.106652218088842	20.3740723169834	2.84046560410371e-92	8.99466e-91
MAP1A	9887.59650378411	-1.50888	0.0740840242745071	-20.3671606382653	3.27101659125134e-92	1.03415e-90
LPIN1	1468.81495194301	-1.08447	0.0532519875063083	-20.3648151246456	3.43145421990092e-92	1.08315e-90
PLOD1	2361.68728568996	1.22121	0.0599688080611909	20.3641411461647	3.47899096881607e-92	1.09641e-90
SEPT8	5840.03792047922	-0.9264	0.0454998584090304	-20.3604947118819	3.7478051617017e-92	1.17925e-90
ZC3H6	465.132130662098	-0.736835	0.0361949263636102	-20.3574127849619	3.99109585548922e-92	1.25381e-90
FAM136A	500.142988463808	0.629374	0.0309196784301951	20.3551274677411	4.18161739768675e-92	1.31159e-90
SLC25A27	437.223257527625	-1.73657	0.0853409273797767	-20.3485760608438	4.77957553429083e-92	1.49677e-90
IFT52	727.323130755161	0.693946	0.0341041438817029	20.3478454261652	4.85133820679524e-92	1.51685e-90
S100A4	253.037051013522	2.94488	0.144749718613879	20.3446396364464	5.17913042473317e-92	1.61679e-90
ZC3H12B	176.948776183784	-2.13333	0.104910761238549	-20.3347094866819	6.34139685705404e-92	1.9765e-90
FAM110B	1774.70095370067	-1.60278	0.0788239729901838	-20.3336484952427	6.48003159952766e-92	2.01654e-90
TMEM179B	676.158332314625	0.841188	0.0413704499463514	20.3330581451138	6.55847482267176e-92	2.03775e-90
HPS4	1156.43178323182	-0.707459	0.0348040117746071	-20.3269473258133	7.42824923659033e-92	2.30438e-90
NIPBL	1453.00447340467	-0.768089	0.0377990669113887	-20.3203063793833	8.50439858573316e-92	2.6341e-90
ADM	410.190062829047	2.98291	0.146875113854408	20.3091497491936	1.0673606139332e-91	3.30083e-90
TMSB10	8631.37924145227	1.62838	0.0801968352079121	20.3047405418517	1.16759082774387e-91	3.60516e-90
BTG3	642.501951815153	1.10136	0.0542712632271842	20.2936447960201	1.46333953364301e-91	4.51132e-90
KIAA1244	595.580275969175	-2.29532	0.113206409139176	-20.2755667111431	2.11343575213638e-91	6.50538e-90
HMGN4	1282.98831907686	0.625978	0.0308765739359135	20.2735481089217	2.20194330973437e-91	6.76731e-90
PLEK2	20.1513585604982	3.31958	0.163755456222046	20.2715547150423	2.29297323167783e-91	7.03616e-90
RPL41	11481.8270572508	1.09819	0.054182155248846	20.2684352298213	2.44301867406325e-91	7.485e-90
SLC6A1	4052.04012517117	-1.689	0.0833824083041405	-20.2561199757002	3.13733715630607e-91	9.59744e-90
RUFY2	636.865109521523	-0.806177	0.0398064625940957	-20.252403877278	3.38320613376759e-91	1.03336e-89
UPP1	394.439189653649	2.00618	0.0991277707265743	20.2383424277717	4.50052616419887e-91	1.37041e-89
YLPM1	2177.55795448506	-0.868824	0.0429400168688929	-20.233425969784	4.97251115379161e-91	1.51181e-89
CEP350	1348.87384172465	-0.926899	0.0458126486647364	-20.232376091038	5.07952984347845e-91	1.54198e-89
C1orf69	216.877770470507	-0.75907	0.0375351631856804	-20.2228967395779	6.15601684327906e-91	1.86591e-89
MRPL13	467.548506393027	0.882242	0.0436438093481583	20.2145890425452	7.28494614595798e-91	2.20136e-89
CUX2	352.801230084854	-3.23358	0.159973612732732	-20.2132127323925	7.49097080210629e-91	2.26018e-89
IGFBP7	7525.15605850792	1.68391	0.0833350343981697	20.2064962567998	8.58286801866347e-91	2.58569e-89
CYS1	118.97768266615	-2.05558	0.101730502995979	-20.2061436850384	8.64438232288702e-91	2.60027e-89
TCEAL2	1859.15475369103	-1.63389	0.0808718892972378	-20.2034802242814	9.12351892136525e-91	2.74024e-89
PTPN11	6419.06416225317	-0.870219	0.0430752936486301	-20.2022861228045	9.34684345873174e-91	2.80306e-89
GNPDA1	1194.81376995719	0.636275	0.0315062747142164	20.1951776281797	1.07937956113803e-90	3.23211e-89
BACE2	246.127821442422	1.76249	0.0873248346655079	20.1831128634774	1.37789692919446e-90	4.11977e-89
DTYMK	556.372959643028	1.25977	0.0624223101911642	20.1814254272345	1.4257498260908e-90	4.25642e-89
CD151	2508.19424706305	1.4448	0.0715986552656272	20.1790961688547	1.49453896287331e-90	4.45507e-89
OTUD7A	84.6728731956296	-1.7157	0.085101606590177	-20.160616302935	2.17160336889499e-90	6.46362e-89
TXNDC17	635.134913219128	0.933012	0.046281238150124	20.1596130592824	2.21608206988012e-90	6.58612e-89
C7orf28A	1028.10145819148	0.861476	0.0427438020851562	20.1544087290259	2.46182139155848e-90	7.29457e-89
MRPL42	522.040007000343	0.808832	0.0401487036024743	20.1458971216271	2.92364762499781e-90	8.65007e-89
CKS2	291.061091961318	1.8462	0.091642010209272	20.1457342097005	2.93328238598395e-90	8.66564e-89
MYH15	105.659568425286	-2.26619	0.112499881072787	-20.1439701262563	3.03966225231024e-90	8.96655e-89
CAPZA2	3352.62594087045	1.02105	0.0507130949693614	20.1339159841954	3.72371940648184e-90	1.09681e-88
CLCN6	1544.69478447134	-0.825977	0.0410285266248926	-20.1317716913374	3.88840757676675e-90	1.14362e-88
KSR2	350.826981876502	-3.03332	0.150715580343166	-20.1261445235466	4.3559683006919e-90	1.27923e-88
C10orf75	375.494923800227	-1.55098	0.0771000020579015	-20.1164897925247	5.29249784749252e-90	1.55197e-88
BTBD8	11.6364923195958	-2.78638	0.138515280893128	-20.1160652932711	5.33799792023547e-90	1.563e-88
ZNF788	89.438956414037	1.07307	0.0533518825209607	20.1130058171829	5.67767581741017e-90	1.66001e-88
BET1	402.006364674158	0.93884	0.0467032640297007	20.1022248498923	7.05583580764102e-90	2.05688e-88
ERCC5	947.085480999866	-0.747421	0.0371829598834181	-20.1011609663878	7.2087356429909e-90	2.09837e-88
CD164	2694.53091198659	1.035	0.0515286497356094	20.086000851915	9.78318743702645e-90	2.84358e-88
PCNT	1028.94456313732	-0.853499	0.0425127007169967	-20.0763213119606	1.18879039119507e-89	3.45028e-88
FBXO4	185.848967875891	1.10615	0.0551153410527012	20.0698091720278	1.35523890576938e-89	3.92762e-88
DSTYK	1148.90217230853	-0.997304	0.0496964958685494	-20.0678855523669	1.408715030829e-89	4.07664e-88
SEC61G	4153.9801795659	3.15048	0.157024898698069	20.063547080928	1.53717705423137e-89	4.4419e-88
PRTG	191.287962900646	-1.45752	0.0726552085534165	-20.0607813218162	1.62510421955113e-89	4.68915e-88
RAB11FIP4	1546.15452569569	-1.89202	0.0943567096347982	-20.0517410003479	1.94903724769447e-89	5.61566e-88
TCEAL4	2695.97405728781	-0.693149	0.0345684177596567	-20.0515097929744	1.95811659259463e-89	5.63364e-88
SAT1	3935.53487820394	1.36474	0.0680631678017441	20.0511207130396	1.97349081592319e-89	5.66964e-88
C12orf41	638.574938019898	0.746933	0.037251593275974	20.0510347934725	1.97690206604031e-89	5.67122e-88
MRPS12	421.457158727242	1.1389	0.0568026780904406	20.0501274789877	2.01328600976552e-89	5.76725e-88
NNMT	759.67780901842	3.84922	0.192023905787038	20.0455266422463	2.20832290789169e-89	6.31682e-88
SNAP91	1604.0342470585	-2.57169	0.128311003809723	-20.042636400821	2.34037010691018e-89	6.68489e-88
MYCBP	218.447614567021	1.26493	0.0631158563843657	20.0414708319845	2.39582429627488e-89	6.83344e-88
PBLD	206.242539265473	-1.02614	0.0512213521184023	-20.0335226123604	2.8105620627303e-89	8.00485e-88
MARCH8	428.302041167578	-1.65293	0.0825201438636031	-20.0305780726033	2.98176653572397e-89	8.48028e-88
NDRG2	29956.0505487475	-1.68301	0.0840694753360389	-20.0193237016424	3.73759888733626e-89	1.06147e-87
AP2B1	10612.0541833634	-0.671708	0.0335759297838098	-20.0056558243588	4.91676723928055e-89	1.39435e-87
C5orf35	83.5684670038115	1.26508	0.0632386720088196	20.0048823836577	4.99362755074619e-89	1.41412e-87
ZYX	3902.47468617844	1.3791	0.0689442031162977	20.0031238319879	5.17287257910145e-89	1.46279e-87
KDM3B	2771.30794657875	-0.731862	0.036588532076691	-20.0025068105817	5.23727339515039e-89	1.4789e-87
APBB1	4052.09678815894	-1.04483	0.052279841653276	-19.9852608160345	7.3999536064651e-89	2.08662e-87
NEU1	1069.50501069799	0.779542	0.0390185396006711	19.9787673981547	8.42790862358651e-89	2.3731e-87
MTPAP	461.115392915177	-0.803449	0.0402231075519417	-19.974823655358	9.12053474165489e-89	2.56449e-87
RINT1	434.85367786075	0.653971	0.0327515423556933	19.9676449054919	1.05302767301334e-88	2.95668e-87
TRIM67	972.435123561778	-3.92366	0.196565828210127	-19.9610704588328	1.20111680492776e-88	3.36771e-87
TRAK1	2016.22558530207	-0.734519	0.0368135585737703	-19.9524143206781	1.42822399058841e-88	3.99883e-87
KCNIP2	1027.79929701798	-2.66942	0.133822707139462	-19.9474164436504	1.57836296119035e-88	4.41296e-87
HBXIP	1316.81815462998	0.956493	0.0479537986639174	19.9461340781442	1.61936036708862e-88	4.52121e-87
GPR158	1161.41180905127	-1.83944	0.0923394710559593	-19.920387860632	2.70884544435793e-88	7.55238e-87
DHRS4	454.510228378278	-1.23507	0.0620178975288698	-19.9146869195018	3.03543887598345e-88	8.45105e-87
CACNG2	98.2743738833394	-3.77282	0.189463307289073	-19.9131929862981	3.12733361377909e-88	8.69469e-87
GTF2E2	314.429303110657	0.709803	0.035647122969913	19.9119163396275	3.2080582603539e-88	8.90663e-87
SLBP	831.042783380875	0.597737	0.0300265786484667	19.9069392175532	3.54311486550563e-88	9.8231e-87
PPARA	736.201612600212	-1.11391	0.0559765055279578	-19.8995193307442	4.10849546023134e-88	1.13747e-86
RPS27A	5957.7949791768	-1.10535	0.0555610980302198	-19.8943497282544	4.55476828265421e-88	1.25926e-86
FKBP1A	3330.74385836473	0.761029	0.038257244242371	19.8924271287208	4.73280400869917e-88	1.30666e-86
BEND7	320.450511932608	-1.13297	0.0569640289135608	-19.8892560472757	5.04174346331422e-88	1.39002e-86
GALNT13	2481.36953870568	-2.48727	0.12505883026776	-19.8887772143836	5.09010988077939e-88	1.40141e-86
FKBP9	1789.59410126907	1.81506	0.0912693912810759	19.8868856873333	5.28573891873798e-88	1.45325e-86
FARS2	217.471865170591	0.623886	0.0313827076481291	19.8799443012901	6.07011920588333e-88	1.66659e-86
COL6A2	2573.15943035549	3.21015	0.161544711737094	19.871578530672	7.17120070549383e-88	1.96618e-86
RYR1	814.340385919284	-2.07535	0.104475968333503	-19.8643717621537	8.27813679844541e-88	2.26654e-86
DAP	1950.39178438587	0.889821	0.0447978089165355	19.8630519046088	8.49859879039264e-88	2.32369e-86
JPH4	2250.93695008542	-2.04915	0.103193380080114	-19.8574053894922	9.50982307217246e-88	2.5966e-86
IL8	423.094344137084	4.07422	0.205192446530134	19.8556251414668	9.85288199361365e-88	2.68657e-86
PPP1R9B	2925.42412224488	-0.793615	0.0399709056820776	-19.8548124168232	1.00135738106634e-87	2.72664e-86
ALG2	492.727765215687	0.617531	0.0311073133432255	19.8516350240117	1.06672925201775e-87	2.90065e-86
DYNLL2	2782.36688848044	-0.811444	0.0408798337864103	-19.8494884655343	1.11328508289886e-87	3.0231e-86
KLF13	2627.1534251269	-0.906551	0.0456845042425173	-19.843737901593	1.24823767221312e-87	3.38493e-86
PFKM	3966.09560584478	-0.868967	0.0437918252346468	-19.8431396652778	1.26318177547748e-87	3.42077e-86
GSTK1	1311.5337911569	1.02478	0.0516701526806541	19.833146535879	1.54092069662615e-87	4.16721e-86
ADHFE1	463.55110608741	-1.57334	0.0793487322904525	-19.8281928631945	1.70039960217136e-87	4.59224e-86
CISD2	460.466562214706	0.642835	0.0324294724706884	19.8225503615087	1.90220008599378e-87	5.13025e-86
PLCL1	511.065378163634	-1.60613	0.0810257952275121	-19.8224108528376	1.90748108256043e-87	5.1375e-86
COMMD1	251.661070558812	0.981229	0.0495159517901201	19.8164172334248	2.14872465523455e-87	5.7794e-86
NFAT5	1304.54323637111	-0.79637	0.0401892001768769	-19.8155134237042	2.1876539750974e-87	5.87613e-86
DPY30	554.955705084955	0.698821	0.0352684424962556	19.8143321831137	2.23959541291948e-87	6.00751e-86
SOX8	13472.2148703325	-2.1192	0.106970396318099	-19.8111104426454	2.38759950005229e-87	6.39586e-86
TSHZ1	1256.85810426371	-1.01274	0.0511317833193629	-19.8063877873098	2.6223623589069e-87	7.01526e-86
AK2	1422.19953818306	1.02372	0.0516894387261164	19.8052316823003	2.68325671570822e-87	7.16849e-86
XBP1	1097.7900746815	0.982877	0.0496384829154934	19.8007022314887	2.93572777840413e-87	7.83243e-86
POLR2L	1150.69424473647	1.17441	0.0593388869445655	19.7915868139661	3.51789800766566e-87	9.37302e-86
PPP1CB	7095.47821279855	0.76483	0.03865765868722	19.7847064125968	4.03239299443167e-87	1.07294e-85
PLAUR	271.630545701572	2.34819	0.118693362342868	19.7836480786541	4.11793360448395e-87	1.09423e-85
RPN2	4653.88964871255	0.727904	0.0368104893301427	19.7743719152024	4.94952413491806e-87	1.31345e-85
HINT3	1254.03887841819	-0.682641	0.0345216704145277	-19.7742708788743	4.95944800926822e-87	1.31432e-85
TMEM151B	1228.19567473478	-2.46963	0.124920121561528	-19.7696776017105	5.4321974705133e-87	1.43768e-85
FAM115C	213.211273472593	2.27118	0.11494371115635	19.7591062167772	6.69802631926046e-87	1.77033e-85
AHCY	2495.58063215745	0.758438	0.0384064596957465	19.7476681417348	8.40082354233123e-87	2.21744e-85
ALG14	175.261789533443	0.96925	0.0490841154762288	19.7467111598184	8.56150216605898e-87	2.25684e-85
BMS1	779.00699196781	-0.644771	0.0326661622722306	-19.738206171263	1.013113809152e-86	2.66706e-85
NR1D2	1339.66835666504	-1.02232	0.0518053592582495	-19.7339062384737	1.10308306989244e-86	2.90006e-85
CALR	12128.8275412917	0.847427	0.0429529448901506	19.729195243799	1.21082485290691e-86	3.1791e-85
FADD	439.106009447501	0.76401	0.0387303991544002	19.7263736201805	1.28031803079585e-86	3.35711e-85
DYNC1LI2	5965.74969536648	-0.785522	0.0398413410248243	-19.7162441257989	1.56421862801427e-86	4.0961e-85
KIF21B	2691.52693322667	-1.82053	0.0923552477138154	-19.7122317811946	1.69331683111617e-86	4.42248e-85
HMGN2	4748.94407918535	1.07629	0.054610969484234	19.708250540165	1.83191416137948e-86	4.77816e-85
NMNAT2	1516.12405659164	-2.2166	0.112492102633383	-19.7044633911594	1.97424001548676e-86	5.14262e-85
GNG10	630.794714252747	0.78868	0.0400288790161526	19.702771360836	2.04134331194253e-86	5.31044e-85
BCL7B	1151.42833311233	0.650252	0.0330135904742379	19.6964807391709	2.3113890724958e-86	6.00507e-85
TOMM5	810.277566149046	0.777293	0.0394738069616082	19.6913514026226	2.55774119721649e-86	6.6364e-85
MRPS15	556.377743229788	1.10208	0.0559692061097612	19.6908863506653	2.58133166396979e-86	6.68885e-85
C12orf34	1215.26389078874	-1.80177	0.0915145928575486	-19.6883262590946	2.71513579833323e-86	7.01723e-85
PER3	995.762342686052	-1.51995	0.0772017392762028	-19.6880334139379	2.73087578039845e-86	7.04872e-85
TOR1B	474.306316571331	0.604106	0.0306928030918703	19.6823482792175	3.05513154104517e-86	7.87541e-85
KCNE3	125.516331996852	1.77839	0.0903581840225032	19.6815545691783	3.10335732333516e-86	7.98933e-85
PGR	25.391431090705	-2.40186	0.122131799091912	-19.6661144721428	4.20818419449413e-86	1.08196e-84
AKAP1	1420.95885399507	-0.801065	0.0407354190713178	-19.6650795751058	4.2949309182143e-86	1.10283e-84
GRIA2	3421.52247277812	-1.84042	0.0935909329326525	-19.6645382232875	4.34101607563667e-86	1.11322e-84
LRIG1	14049.1804213155	-1.34944	0.0686657128689642	-19.6522573167583	5.52980696789403e-86	1.41625e-84
PNMAL2	882.319457596692	-1.92193	0.0978263288426935	-19.6463346938299	6.21414505934346e-86	1.58946e-84
CDCA4	155.044210662271	1.44831	0.0737209047858069	19.6458635686236	6.27207841321013e-86	1.60221e-84
FAM119B	327.589889606527	2.22913	0.113534739895726	19.6339310764075	7.9332688254527e-86	2.02395e-84
FLJ16779	3598.73825641236	-2.47347	0.126028298298224	-19.626309671496	9.21710058252694e-86	2.34847e-84
ARID4A	679.800909907031	-0.83042	0.0423157815101612	-19.6243551133177	9.57847558573733e-86	2.43644e-84
KIAA1755	970.839808738195	-1.57502	0.0802586307796759	-19.6243101746591	9.58694832576239e-86	2.43644e-84
NAA20	880.74673479687	0.683833	0.034852591017624	19.620724221887	1.0287708711667e-85	2.61118e-84
FAM20C	1870.48777529623	1.65541	0.0843933786711621	19.6153635644135	1.14316670612711e-85	2.89783e-84
PCDHGB4	199.001596516071	-4.04974	0.206656671817275	-19.5964515022839	1.65789714766549e-85	4.19725e-84
BAI3	1063.55980973526	-1.46345	0.0747063869590033	-19.5893371145296	1.90656408013907e-85	4.82064e-84
TIMP1	3272.07657751337	3.24206	0.16555724152231	19.5826960690694	2.17213740776041e-85	5.48513e-84
DCTPP1	620.425225422628	0.98134	0.0501157452538168	19.5814766130664	2.22476904329198e-85	5.61089e-84
WDR41	702.921050236601	0.644655	0.0329259399511185	19.5789256461662	2.339017960944e-85	5.89153e-84
HNRNPA1L2	2116.48464257846	-0.757331	0.0386916807617251	-19.5734865596956	2.6025305352744e-85	6.54695e-84
NCOA1	2889.77110211857	-0.772224	0.0394564987044589	-19.5715378987834	2.70397656674606e-85	6.79353e-84
CYP2E1	81.550606582227	-2.14766	0.109736718387916	-19.5710638685062	2.72924489859782e-85	6.84833e-84
GTPBP1	1810.83971177042	-0.744878	0.0380671683999672	-19.5674526555042	2.92963347250345e-85	7.34186e-84
AP2S1	1188.36466002354	1.0429	0.0533123902738428	19.5621417659869	3.25129652666791e-85	8.13768e-84
SREBF2	4877.33659502375	-1.078	0.0551148159104388	-19.5591902063656	3.44505005437988e-85	8.61176e-84
LOC647979	11602.3539967441	-0.698393	0.0357071971253403	-19.5588839271873	3.46580364571427e-85	8.65272e-84
NRXN2	5242.59146554878	-1.37076	0.0700953564880642	-19.5557108737452	3.68828763375538e-85	9.19659e-84
BPTF	2041.82012862986	-0.878259	0.044911848302593	-19.5551828004808	3.72667295922993e-85	9.28063e-84
LOC388955	293.189358881181	0.779611	0.0398686943175353	19.5544630159662	3.77963613640756e-85	9.40072e-84
GBE1	605.838326721336	1.11654	0.0571362905895974	19.541659303579	4.85770983669975e-85	1.2067e-83
PRMT6	436.921718207641	0.825794	0.0422599143514207	19.540827263275	4.93754656155935e-85	1.22499e-83
ZNF91	469.237107651061	-0.863452	0.0442084063186613	-19.531395125642	5.93944775044882e-85	1.47172e-83
PLOD2	1168.27428482607	1.52864	0.0782756607489101	19.5289744805435	6.22774996418477e-85	1.54123e-83
PAFAH1B1	5720.19984399408	-0.64336	0.0329554962786022	-19.5220704529499	7.12900455348843e-85	1.76207e-83
ZHX2	1832.49990941494	-1.06815	0.0547208721040868	-19.5199561657969	7.43019709770784e-85	1.83423e-83
UCHL3	199.331834986512	0.773078	0.039611106377126	19.5166971362347	7.9195096950898e-85	1.95259e-83
YPEL4	315.71759093091	-1.85133	0.094907960463767	-19.5065930780011	9.6503217551055e-85	2.37638e-83
SECISBP2L	2633.11368495074	-0.997197	0.0511245979692223	-19.50522173541	9.9126376966e-85	2.43794e-83
KLHL32	513.054802539813	-1.89063	0.0969342332055514	-19.5042629307293	1.01002544715926e-84	2.48101e-83
CUL9	953.458105667536	-0.709628	0.0363965223529596	-19.4971460523905	1.16081544434294e-84	2.84788e-83
SAPS2	1600.02472384916	-0.704885	0.0361563562079758	-19.4954751197655	1.1993563150723e-84	2.93879e-83
GABRB3	1309.60145794148	-2.47214	0.126819242730332	-19.4934183032187	1.24855448364433e-84	3.05557e-83
CSDC2	1488.53645935234	-2.46757	0.12658983267873	-19.4926357098249	1.26779798055475e-84	3.09884e-83
RCAN1	2974.21067219692	1.55461	0.0797890985662512	19.4840449624359	1.4995115987227e-84	3.65619e-83
DGCR9	140.411775380475	-2.03975	0.104694373988667	-19.4829205707222	1.53281195964495e-84	3.73279e-83
NIP7	366.447626911424	0.642951	0.0330054806924555	19.4801191270577	1.61902378072002e-84	3.9379e-83
SOS2	1285.16932699932	-0.730188	0.0374852107873624	-19.4793630051235	1.64311040906918e-84	3.99159e-83
PPIH	297.210729471424	0.974795	0.0500444918744442	19.4785738971199	1.66862902536819e-84	4.04862e-83
CDC42	3907.93894247551	0.815381	0.0418622034123955	19.4777338828013	1.69622836268541e-84	4.11055e-83
LOC154761	36.4071516966295	2.37992	0.122190076365763	19.4771747897978	1.71484970260724e-84	4.15061e-83
PPP1R9A	1003.24081867372	-1.34258	0.0689606582183385	-19.4687669107573	2.02077549714396e-84	4.8851e-83
CHD3	3202.59334584825	-1.12086	0.0575784002699332	-19.4667084589759	2.10362055143527e-84	5.07918e-83
ZNF483	80.4496420273408	-1.52572	0.0783962436090122	-19.4615926323965	2.32448059659806e-84	5.60562e-83
DPP4	73.6124295262733	3.11302	0.160044873437488	19.4509319930471	2.86182027285794e-84	6.89306e-83
LOC254559	1927.09677036274	-2.09982	0.107960935942038	-19.4498234381028	2.92436215551341e-84	7.03515e-83
CCL20	15.491187801579	4.55344	0.234273757006147	19.436400976509	3.79899879769912e-84	9.12819e-83
NOLC1	1961.66596245301	-0.616011	0.0317137547292288	-19.4241043904021	4.827326919632e-84	1.1585e-82
BMP2	1124.80805848652	-2.16041	0.111249248992496	-19.4195604191317	5.27394082538111e-84	1.26415e-82
ZBTB44	1012.7175356166	-0.749063	0.0385920616658092	-19.4097794043037	6.38003892726239e-84	1.52743e-82
TREM1	81.7731792891438	4.08545	0.210539957993876	19.4046269910858	7.05285308156555e-84	1.68647e-82
SGK269	2171.03574409471	-0.994388	0.0512484023388041	-19.4033028990972	7.23689858495018e-84	1.7284e-82
KCNJ10	6192.25557668523	-1.42619	0.0735045365093124	-19.4027301638953	7.31798411589339e-84	1.74566e-82
F5	719.078276265855	-3.90197	0.201110233755139	-19.4021680516246	7.39844667991097e-84	1.76273e-82
FRMPD1	108.038672750257	-1.95641	0.100839270881255	-19.4012543537976	7.53112338154497e-84	1.79219e-82
BDP1	730.016183069847	-0.865489	0.0446137434626273	-19.3996019900102	7.77711547546487e-84	1.84851e-82
DENND5A	6449.36229984979	-0.834322	0.0430287263713157	-19.3898757288309	9.39636264409289e-84	2.23071e-82
SLC16A3	567.305917378941	1.95452	0.100821891899401	19.3858289504736	1.01653881805563e-83	2.41039e-82
CRLF3	215.827345812199	0.758898	0.0391513916522703	19.3836783138108	1.05993063270122e-83	2.51028e-82
SMOC1	11242.0174255696	-2.65429	0.13694040541422	-19.3827954948517	1.07827297108738e-83	2.55067e-82
TAB1	1266.37770181442	-0.639638	0.0330026476576531	-19.3814103281537	1.10769269039703e-83	2.61714e-82
WASF3	3170.4386361078	-1.35159	0.0697454646799741	-19.3788542500689	1.16409914822529e-83	2.74714e-82
HCCS	312.817814596311	0.718612	0.0370913870995156	19.3740853421683	1.277106470463e-83	3.01024e-82
ITGA5	819.788964440624	1.92229	0.099292450558213	19.3598963207062	1.68223687596634e-83	3.96045e-82
ALG5	456.305626457837	0.83182	0.0429678374018707	19.3591317149429	1.70739030040442e-83	4.0149e-82
C10orf18	1217.46994433601	-0.906648	0.046852265802734	-19.3512122183683	1.99103836453604e-83	4.67635e-82
PTPN12	1482.06339345497	0.711817	0.0368083715856944	19.3384472902006	2.55039446223825e-83	5.98301e-82
CAMSAP1L1	2757.45710536485	-0.881716	0.0456021405951641	-19.3349642108804	2.72857227226667e-83	6.39344e-82
ASB1	1055.79446726886	-0.895881	0.046337817740873	-19.3336955613312	2.79651011994625e-83	6.54489e-82
CLASP2	4984.90112654179	-1.01097	0.0523002949376413	-19.3300519975562	3.00115329989819e-83	7.01555e-82
MED13L	2202.30234073589	-1.02211	0.0528934141920728	-19.3239239771148	3.37956911564063e-83	7.89084e-82
LSM5	704.795458009069	0.922253	0.0477305989203148	19.3220395924031	3.50523356921688e-83	8.17462e-82
LRSAM1	806.577051754013	-0.739757	0.0382949921016668	-19.3173203520057	3.84077569757419e-83	8.94662e-82
TWISTNB	406.921315517049	0.657251	0.0340298830065357	19.3139299207396	4.10143638230285e-83	9.54258e-82
MYL6	10314.0392293759	1.1812	0.0611982444612371	19.3012885176465	5.23864978643353e-83	1.21742e-81
FAM96A	617.083944836788	0.790581	0.0409664752944393	19.2982371786405	5.55729330808873e-83	1.28954e-81
PDZD8	609.316577178814	-1.30963	0.067862628221661	-19.298193180275	5.56202656744886e-83	1.28954e-81
STK17A	1031.25121165952	1.21245	0.0628307106788804	19.2971259262965	5.67807943585679e-83	1.31491e-81
KIAA0528	952.081466462204	-0.766259	0.0397152085500082	-19.2938341793781	6.05145402280815e-83	1.39974e-81
TGFBI	2055.70521732807	2.66828	0.138404473172368	19.2788310795007	8.08836927819083e-83	1.86871e-81
SCAMP5	4441.06305513741	-1.29684	0.0672691567493108	-19.2783663535042	8.16135641104912e-83	1.88338e-81
SEMA3G	283.844718094244	-1.81425	0.0941314829154824	-19.273551390824	8.95732711015882e-83	2.06466e-81
RPL3	26081.4432941784	-1.01452	0.0526392376727765	-19.2730962364413	9.03646173676082e-83	2.08049e-81
QPCTL	177.238850360672	1.02238	0.0530751975847999	19.2627734153257	1.10308957986094e-82	2.53672e-81
SLC2A4	75.3056101251858	-2.32677	0.120818209975297	-19.2584123019763	1.20001949500734e-82	2.75643e-81
FNDC3B	554.17155404172	1.30503	0.067786961041628	19.2520001363989	1.35816783299856e-82	3.11608e-81
PQLC3	190.989205787337	1.30538	0.0678202023043121	19.2476676958073	1.47662523411147e-82	3.38395e-81
ALG6	228.365598199821	1.09278	0.0567802376229252	19.245694630476	1.53393474755777e-82	3.51122e-81
SLC23A2	3379.58204922982	-0.89972	0.0467593657296852	-19.2415005677602	1.66323051437664e-82	3.80279e-81
HINT1	3249.15236883253	0.809729	0.0420896251202265	19.2382027945152	1.7724822437477e-82	4.04792e-81
C14orf132	4770.23004758238	-1.50796	0.0783931113179526	-19.2358822749583	1.85362073336896e-82	4.22835e-81
CHD6	1683.86562170462	-0.914915	0.0475654645633109	-19.2348581943778	1.89059653098919e-82	4.30774e-81
MIR155HG	14.8608312128659	2.7076	0.140807885435289	19.2290301281009	2.11547394179439e-82	4.81459e-81
AURKA	145.142144457337	1.79692	0.0934859477988001	19.2212993029362	2.45543818863159e-82	5.5819e-81
EIF5AL1	1113.70781285639	0.668785	0.0348002136649891	19.2178370899008	2.62485760988104e-82	5.9602e-81
BCL2L2	1559.56796361914	-1.16023	0.0603898915178995	-19.2123284796922	2.91876388966004e-82	6.61998e-81
CCNY	2041.30189400502	-0.640658	0.0333481855500797	-19.2111844043529	2.98380439928327e-82	6.75977e-81
KIAA1462	980.320027720474	-1.37831	0.0717695079167408	-19.2046991612953	3.38076876510695e-82	7.65034e-81
DENND5B	1088.20860993583	-1.03973	0.0541687053215506	-19.1942435282006	4.13458690221019e-82	9.34549e-81
SIAH2	460.687555706909	0.592849	0.0308877073821735	19.1936897471915	4.17888879320669e-82	9.43486e-81
PPP1CA	2048.35700462628	0.751968	0.0391874539862553	19.1890012925425	4.57344210338568e-82	1.03139e-80
FAM196B	101.137846404102	-2.49546	0.130269942711467	-19.1560684323113	8.61393307449222e-82	1.93818e-80
RAB27A	117.607324325224	1.52021	0.0793728234975628	19.1528173618036	9.16894543536591e-82	2.06073e-80
C1orf174	315.746845559329	0.781835	0.040821092964934	19.152712096092	9.1875000870444e-82	2.06256e-80
PHF2	1854.74897961105	-0.729788	0.038133097277121	-19.1379146398494	1.22058403240808e-81	2.737e-80
TUBA1B	27352.6764483857	1.07214	0.0560220258536893	19.137856883052	1.22193761018228e-81	2.737e-80
SEPHS2	904.446732717383	0.619968	0.0324184231752737	19.1239373961574	1.59592538262384e-81	3.57066e-80
ZNF416	139.399448001037	0.818679	0.0428261862917289	19.116318171944	1.84694076036805e-81	4.12761e-80
MRVI1	1638.61212450008	-1.68261	0.0880968463813532	-19.0995125039085	2.54855535115618e-81	5.68919e-80
KIAA2018	445.987912414916	-0.793387	0.0415564968052053	-19.0917560902001	2.95661283080575e-81	6.59268e-80
HIRA	1443.77589532748	-0.676549	0.0354368221439744	-19.0916857909345	2.96059450782281e-81	6.59414e-80
TEAD2	274.286216611484	1.87866	0.0984726934889085	19.0779438582496	3.85113719821606e-81	8.56802e-80
GPR89C	77.270171399251	1.51352	0.0793550673398559	19.0727153181205	4.25620203003156e-81	9.4586e-80
C21orf125	11.7443092637788	-3.23162	0.169456772211471	-19.0704550362851	4.44421055694453e-81	9.86535e-80
ATM	1363.55921544999	-0.840311	0.0440646607303893	-19.0699562519697	4.48680193221403e-81	9.94876e-80
RAP2A	4539.83440822387	-1.25207	0.065664466080557	-19.0677093741144	4.68376705347258e-81	1.03739e-79
SF3B2	6491.26513178537	-0.581733	0.0305121937265941	-19.0655758678656	4.87876836261011e-81	1.07937e-79
PURA	401.722672290202	-0.734371	0.0385244501917302	-19.0624596864582	5.17822489126562e-81	1.14435e-79
MAGT1	1669.28175378021	0.903809	0.0474198193109689	19.0597375410297	5.4547753222594e-81	1.20412e-79
RAB11FIP2	565.401898885129	-1.02838	0.0539559519270653	-19.0596632148345	5.46252941023943e-81	1.20449e-79
SETD3	1337.37862315608	-0.614983	0.0322722537742403	-19.0561003437879	5.8474089820223e-81	1.28792e-79
ERCC6	191.31153527875	-1.01326	0.0531750104725985	-19.0551295820806	5.95688552866268e-81	1.31058e-79
UBR4	3525.43614323859	-0.766144	0.0402092413061809	-19.0539189910751	6.09627668706609e-81	1.33976e-79
AKAP9	1198.00248374839	-1.02909	0.0540112735438543	-19.0533250807869	6.16584597159249e-81	1.35355e-79
UNKL	576.871909439075	-0.804029	0.0422011889904301	-19.0522815963342	6.29000033073023e-81	1.37928e-79
MEST	2201.08479233854	1.84982	0.0971400167857943	19.0428534208075	7.53107069251742e-81	1.6496e-79
BEX4	2596.96839775029	-0.964787	0.0506785040958123	-19.0373989265641	8.35764254521152e-81	1.82863e-79
KIF1B	8551.75086844682	-1.0689	0.0561508559601535	-19.0362701402866	8.53968297512631e-81	1.8664e-79
SECISBP2	969.526380966595	-0.6059	0.0318293148810347	-19.0358991233177	8.6003764818376e-81	1.87759e-79
IDI1	1826.45414126736	-1.06164	0.0557841162216699	-19.0312389001102	9.40038050967613e-81	2.04999e-79
MAPK8IP2	1780.91316180032	-1.68983	0.0888171359139068	-19.0259516533792	1.03982278268382e-80	2.2651e-79
LRP4	5451.04055168736	-1.55159	0.0815854761846226	-19.0179860190765	1.21044592074749e-80	2.63388e-79
ZNF275	1840.87271048515	-0.999831	0.0525924849666587	-19.0109135159881	1.38519164295445e-80	3.01082e-79
C9orf122	35.283346130957	-2.75594	0.144983237447853	-19.0086800735402	1.44543835456501e-80	3.13833e-79
FAM120AOS	751.259941982176	0.607453	0.0319582928367999	19.0076760637934	1.47336597571594e-80	3.19546e-79
ACACA	2361.88382241137	-0.870903	0.0458419349253062	-18.9979640780953	1.77289351924826e-80	3.84088e-79
ACTB	91349.2133411728	0.736278	0.0387566208793074	18.997471537306	1.78960675179233e-80	3.87286e-79
CA9	141.840402566225	4.14848	0.218527610033385	18.9837919308196	2.32215739934813e-80	5.01986e-79
TOP2B	4715.11617799639	-0.670886	0.0353413491918024	-18.9830204244584	2.35651281217593e-80	5.08858e-79
LRRC27	361.433969465621	-0.861262	0.0453793700494078	-18.9791613761343	2.53611668822513e-80	5.47045e-79
HECA	870.608784813763	-0.673631	0.0355049630278024	-18.9728721803717	2.85853011076438e-80	6.1592e-79
RPS2P32	20.8991291569475	2.32955	0.122793070474902	18.9713826165942	2.94069462996545e-80	6.32936e-79
RUNDC3A	2299.37362779444	-1.89416	0.0998591340955818	-18.9683585032204	3.11482011979745e-80	6.69686e-79
COL3A1	3760.57173587661	3.68668	0.194376687740003	18.9666610250749	3.2170260334126e-80	6.90911e-79
POLR2G	1541.88160435992	0.793853	0.04186289253064	18.9631616161758	3.43840199879966e-80	7.37656e-79
GPX8	155.583962827309	2.99113	0.157743360618134	18.9620298040038	3.51320344612423e-80	7.52889e-79
MRPL22	283.353738276225	0.742706	0.0391712652224954	18.960476614469	3.61850214612006e-80	7.74617e-79
KIDINS220	3895.56584592107	-0.777581	0.0410123864042246	-18.9596545103073	3.67550463562353e-80	7.85971e-79
FAM45A	397.286159888187	-0.637931	0.0336510782415185	-18.9572165018743	3.84986913350719e-80	8.2237e-79
CTSB	16619.446148291	1.19358	0.0629738618722984	18.9536445621975	4.12033394668534e-80	8.79197e-79
COL6A1	5255.9114966375	1.74056	0.091858552116785	18.948242463134	4.56579468254631e-80	9.73202e-79
ACN9	251.974643104309	1.45232	0.0766795390082782	18.940124125665	5.32713749109625e-80	1.13426e-78
HIF1AN	918.157067744091	-0.582641	0.0307713571757048	-18.9345331369699	5.92384683169786e-80	1.25861e-78
GFRA1	1029.06560037321	-2.72506	0.143942860911674	-18.9315111152018	6.27366544035089e-80	1.33151e-78
GDAP1	1154.89846212386	-1.11873	0.0590948634065715	-18.93107263847	6.32610516222529e-80	1.3412e-78
SMAD9	346.139809854976	-1.78784	0.0944538060709244	-18.9281614857534	6.6855246979326e-80	1.41589e-78
AGAP4	270.357585624555	-1.31221	0.0693309373267298	-18.926746780948	6.8674701238025e-80	1.45287e-78
ARPC1A	2305.37709138469	0.598079	0.0315997873124187	18.9266855063494	6.87546127038306e-80	1.45301e-78
PAIP2B	658.120487617275	-1.86478	0.0986473123407378	-18.9035223247758	1.06686609063564e-79	2.25223e-78
FBXO18	1220.45270122467	-0.67038	0.035465028050591	-18.9025707639697	1.08628424497284e-79	2.29079e-78
CALD1	3161.77198440398	1.24473	0.0658595049580708	18.8997405829689	1.14614658903203e-79	2.41446e-78
PDRG1	583.065823280951	0.796107	0.042159337462475	18.8832947970285	1.56511156097218e-79	3.29355e-78
GIT1	2856.06469437147	-0.79741	0.0422685119412538	-18.8653480588224	2.19819199460595e-79	4.62087e-78
NODAL	36.4575752534866	2.21299	0.117309755573687	18.8644614619836	2.2353716563859e-79	4.69404e-78
C7orf44	774.641174589143	0.602944	0.0319649480994686	18.8626667620332	2.31256328085747e-79	4.851e-78
TPTE2P1	88.1199163187032	-2.17928	0.115542495385034	-18.8613066326598	2.37282921939796e-79	4.97216e-78
TSPYL2	2429.71782799048	-1.52177	0.0806940087946585	-18.858470414068	2.50358404396612e-79	5.24061e-78
COX7B	1398.40240494479	1.03386	0.0548347415117115	18.8541418681966	2.71711862494799e-79	5.68159e-78
PDCD11	825.33176322139	-0.862297	0.045743864735313	-18.8505499915129	2.90803257347525e-79	6.07439e-78
SLC10A3	232.046367043795	0.882919	0.0468475327677544	18.84665434403	3.13024039161264e-79	6.53166e-78
SMG1	2027.24648328542	-0.823796	0.0437113073471888	-18.8462879823289	3.15198924728678e-79	6.57012e-78
GNAZ	1167.31449867643	-1.0762	0.0571091898310262	-18.8446793367611	3.2492829786046e-79	6.76581e-78
VPS25	794.581346476089	0.616765	0.0327490532801392	18.8330706232655	4.04605461914655e-79	8.41605e-78
PPM1L	238.403718425013	-1.72221	0.0914586487535385	-18.8304564139746	4.25081384023438e-79	8.83269e-78
PTGR2	511.181620610278	-0.943982	0.0501334692446112	-18.8293751844794	4.33849284991465e-79	9.00544e-78
TPPP	3691.89963813916	-2.17108	0.115311479283419	-18.8279398076745	4.45768265058756e-79	9.24316e-78
DMXL1	858.996166787819	-0.800289	0.0425059168785884	-18.8277071300219	4.47730878870821e-79	9.27416e-78
CHRNA4	400.217138442939	-2.48759	0.132128298856981	-18.8270434197321	4.53376684952209e-79	9.3813e-78
TRNAU1AP	300.217302305428	0.872563	0.0463483521839614	18.8262015730876	4.60640038277895e-79	9.52166e-78
TET1	121.729239422533	-1.63592	0.086913440628411	-18.8224433232906	4.94507319779621e-79	1.02004e-77
UQCRQ	1731.7900792577	1.01592	0.0539810227654919	18.8199675844524	5.18162629803025e-79	1.06773e-77
PPIAL4G	14.0691205075298	1.30134	0.0691495755127255	18.8192454357632	5.2527286097496e-79	1.08125e-77
SLC27A3	319.859249508311	1.64543	0.087467540591306	18.8118986194895	6.03376091449794e-79	1.24074e-77
PHLPP2	531.048484729403	-0.977265	0.051951081607526	-18.8112619078627	6.10667067471404e-79	1.25443e-77
NRXN1	2865.61274527475	-1.76483	0.0938368508408331	-18.8073767435497	6.57098947969779e-79	1.34841e-77
MTMR3	2060.10217529387	-0.688893	0.0366303991241797	-18.8065809741397	6.67035126444842e-79	1.36739e-77
PDE2A	1412.65541176846	-2.09699	0.111503311172202	-18.8064884890926	6.68199593386023e-79	1.36836e-77
RNF146	1154.76749926964	-0.59388	0.0315808185727606	-18.8050970763143	6.85965350984226e-79	1.40329e-77
C14orf109	288.183836234495	0.666397	0.0354563310576275	18.7948591548189	8.32007412331513e-79	1.7003e-77
WDR61	888.238423743113	0.725566	0.0386128359354705	18.7908077797796	8.98020182696603e-79	1.83331e-77
CLDN23	20.1712462682281	2.04105	0.108634996978277	18.7881866194373	9.43486022491426e-79	1.92415e-77
SFRS9	1903.67288206985	0.589131	0.0313574009162361	18.7876182893184	9.53642975400484e-79	1.94286e-77
NDRG3	2368.56619189326	-0.883637	0.0470414467827348	-18.784222165049	1.01665026843452e-78	2.0691e-77
RQCD1	250.711434774313	0.605523	0.0322499541722412	18.7759317210413	1.18844690053845e-78	2.41626e-77
TERF2IP	3974.49089088364	-0.672209	0.0358074527234989	-18.7728776870431	1.25878473470689e-78	2.55665e-77
JAGN1	678.064117026442	0.644506	0.0343497792152655	18.7630366641785	1.51492218024211e-78	3.07373e-77
PHF3	1560.3978415772	-0.741815	0.0395457257873373	-18.758408412989	1.65274695446593e-78	3.34994e-77
ATP6V0B	2408.24074948837	0.957566	0.051052943507469	18.756327426638	1.71872523159884e-78	3.48011e-77
BRD3	1541.48054589345	-0.882857	0.0470992955022532	-18.7445867266275	2.1433049487684e-78	4.33538e-77
CREBBP	2686.61770296802	-0.818799	0.0436898549992333	-18.7411610565365	2.2858493330127e-78	4.619e-77
SNAI2	118.050459853172	2.25362	0.120295273175119	18.7340962225609	2.61036696789408e-78	5.26938e-77
SPTBN1	14965.0367938468	-0.847593	0.045246669274085	-18.7327193329848	2.67876999531911e-78	5.40196e-77
ENHO	2988.50150488896	-1.82053	0.0972212864564234	-18.725656807604	3.05875528905371e-78	6.16196e-77
FKBP1AP1	7.44468451557418	-2.38949	0.127613904717263	-18.7243937664143	3.13216862415206e-78	6.30345e-77
DGCR6	1512.52592515355	-1.71962	0.0918432151723888	-18.7234427021754	3.18860581672545e-78	6.41052e-77
GRIK4	504.084745285149	-1.22108	0.0652249080781419	-18.7210852801299	3.33290820642645e-78	6.69384e-77
ILK	2076.46984788706	0.774746	0.0413860810207826	18.7199739395311	3.40317620490609e-78	6.82805e-77
FLYWCH1	1204.23470808753	-0.680718	0.0363643755342453	-18.7193719033402	3.44185673276973e-78	6.89868e-77
PL-5283	1603.65992667477	0.799236	0.0426965546724395	18.71897651708	3.46749829354548e-78	6.94305e-77
MANF	737.185884423329	0.973971	0.052032188550375	18.7186180222006	3.49091199207603e-78	6.98288e-77
PTGIR	11.5081042480558	2.02923	0.108412831120601	18.7176409739974	3.55552750714881e-78	7.10496e-77
ARNT2	7361.90804887585	-0.935347	0.0499770460360513	-18.7155380810428	3.6986731346417e-78	7.38356e-77
psiTPTE22	517.127319305564	-3.68658	0.197016212337938	-18.7120599076206	3.94815663853499e-78	7.87367e-77
SPP1	28738.7411479151	2.50134	0.133719762652797	18.7058137488035	4.43904723015922e-78	8.83486e-77
RNASEN	1438.10023731301	-0.620968	0.0332009273207102	-18.703324920991	4.65119663746433e-78	9.24781e-77
MCF2	101.411539545718	-2.67538	0.143106981175785	-18.6949661449021	5.44050012399198e-78	1.08063e-76
COMMD8	229.751549055794	0.7842	0.041950057206399	18.6936462678368	5.57680137631838e-78	1.1066e-76
HEATR2	724.497637393052	0.819771	0.0438628513750208	18.6894129526799	6.0373653854744e-78	1.19559e-76
ASL	382.219152356303	1.0037	0.0537049761356605	18.6892024332617	6.06123385068566e-78	1.19912e-76
KIAA0913	1835.86359731656	-0.716383	0.0383382505245031	-18.6858513326697	6.45409928989186e-78	1.27557e-76
RPS6KA5	219.540580097836	-1.36966	0.0733431768714356	-18.6747344894984	7.94841956651501e-78	1.56934e-76
PIGT	2087.63657198742	0.800808	0.0428833787015574	18.6740775804545	8.04680788300385e-78	1.58718e-76
LOC283070	820.880331644816	-1.33722	0.0716231755040915	-18.6701500842715	8.66090553944759e-78	1.70661e-76
GPRC5B	11665.9123957527	-1.12846	0.0604698554074092	-18.6615727274607	1.01693669030208e-77	2.00186e-76
ZDHHC17	1378.52426208561	-0.65981	0.0353606375535316	-18.659441761345	1.05831002758102e-77	2.08124e-76
ARHGAP12	1503.79702245767	-0.905696	0.0485571678755504	-18.6521545543227	1.21289539063808e-77	2.38288e-76
C19orf40	22.8896672308646	1.27534	0.068378237907629	18.6512683128149	1.23316933790942e-77	2.42031e-76
KIAA0652	2628.26496000399	-0.646803	0.0346797254932977	-18.650742896579	1.24534811999433e-77	2.44179e-76
FN1	15003.9755005498	2.05481	0.110286898864458	18.6315215741684	1.78380298084826e-77	3.49065e-76
TNFAIP6	111.598791557326	2.98621	0.160341767276605	18.624057745846	2.05069881608348e-77	4.00897e-76
YRDC	345.318655851775	0.685199	0.0368166694483021	18.6111024688278	2.61187520514535e-77	5.10101e-76
ASXL3	137.335094206319	-1.7841	0.0958924246347982	-18.6052090085425	2.91552460193571e-77	5.68843e-76
ANXA2	2467.57525874813	2.19103	0.117792908136592	18.6007314501879	3.16953526784074e-77	6.17188e-76
MRPL33	508.740166443808	0.78417	0.0421794011000441	18.5913030515729	3.77885010441623e-77	7.34394e-76
ABCC8	612.180570033415	-2.64911	0.142507348930582	-18.5893184419934	3.92128894781271e-77	7.61329e-76
TMEM214	1058.76308124448	0.586067	0.0315319259586611	18.5864731864525	4.13488668145526e-77	8.02014e-76
SLC22A17	7061.23412222595	-1.02729	0.0552797405204789	-18.5834781466133	4.3722725130603e-77	8.47229e-76
DDX6	3504.03012780006	-0.581915	0.0313230402019591	-18.5778729680098	4.85364927184574e-77	9.38672e-76
USH1C	764.145275983326	-3.15982	0.170090381135041	-18.5773066315131	4.90513358499986e-77	9.47704e-76
BRI3	1188.38234556407	0.910346	0.0490249347951294	18.5690345427894	5.72226138867737e-77	1.1045e-75
FPGT	262.33928076061	1.1113	0.059864031221926	18.5637465179341	6.31436248093047e-77	1.2176e-75
C1orf212	589.241189483227	0.820062	0.0441789052050312	18.5623036186982	6.48627662976259e-77	1.24954e-75
PLEKHG3	873.889520342939	-1.35679	0.0731128237790518	-18.5574964517779	7.09341380588302e-77	1.36517e-75
TDO2	33.1008865864844	3.16006	0.170297968351907	18.5560480953116	7.28721282821166e-77	1.40111e-75
RARS2	416.367587078217	0.70558	0.0380363273924119	18.5501504130641	8.13241143836854e-77	1.5621e-75
PPM1M	421.968910360695	1.14506	0.0617300080311225	18.5494889834995	8.23309775050379e-77	1.57991e-75
HTT	2453.02683587956	-0.696401	0.0375653282921854	-18.5383988230597	1.01189739782292e-76	1.93993e-75
FAM123C	226.725917371808	-3.05105	0.164593883527752	-18.5368483641075	1.04148977414892e-76	1.99473e-75
ANXA5	7332.55553779503	1.36164	0.0734647124154655	18.53458555388	1.08623365581451e-76	2.07842e-75
PHF21A	1488.24528668009	-0.661358	0.0357044917039842	-18.5230931658961	1.344838112625e-76	2.57075e-75
ZNF721	643.452116105431	-0.650671	0.0351355604743755	-18.5188676747549	1.45464330173533e-76	2.77798e-75
C1QTNF6	255.947093953632	1.4705	0.0794330602202811	18.5125038314871	1.6371114254325e-76	3.12343e-75
PLK5P	26.6852854784741	-2.62009	0.14154570086492	-18.5105252478059	1.69836532095021e-76	3.23718e-75
ATG4A	201.915607850913	0.691553	0.0373652810669793	18.5078924428255	1.78343053117783e-76	3.39606e-75
UBXN1	2766.39125743899	-0.957914	0.0517580517535763	-18.5075434800155	1.79501975231796e-76	3.41484e-75
BAK1	254.610747203661	0.687727	0.0371670824814289	18.5036612487463	1.9291271239823e-76	3.66645e-75
BMPR2	2595.7043917624	-0.736139	0.0398156985989445	-18.4886539493156	2.54836431198739e-76	4.83872e-75
KIAA1671	967.505643028307	-1.30874	0.0707894217777795	-18.4877301484198	2.59239146266935e-76	4.91761e-75
LRRC16B	311.627395652316	-1.63269	0.0883149255314063	-18.4870934707916	2.62317536593018e-76	4.97124e-75
CBLN1	118.807190650914	-2.80043	0.151483272139841	-18.4867081533648	2.64198255522579e-76	5.0021e-75
MBD2	565.901579662992	0.73575	0.0398107337509143	18.4812016398339	2.92591701161309e-76	5.53439e-75
FAM149B1	563.609588332088	-0.725767	0.0392792439829211	-18.4771088249225	3.1564876494106e-76	5.96483e-75
RAPGEF4	1522.48424318812	-1.92989	0.104459582118675	-18.4750308682131	3.28039616579037e-76	6.19308e-75
PIGY	1860.34495712054	0.624333	0.0338113386614599	18.4651944540552	3.93603297160178e-76	7.42379e-75
POU2F1	115.485842247	-1.16392	0.0630558624265471	-18.458567149221	4.44990507364451e-76	8.38503e-75
TMBIM4	885.477788451848	0.861862	0.0467271732696417	18.4445593471342	5.76671953664149e-76	1.08457e-74
CYP27B1	41.5979430026224	2.878	0.156079851390366	18.4392488580748	6.36188807050469e-76	1.19537e-74
CIRBP	9649.10644563842	-0.884526	0.0479884902424594	-18.4320537724098	7.26711450057487e-76	1.36288e-74
CAMK2G	2645.06775836471	-1.30258	0.070678025754663	-18.4297967550732	7.57671685448537e-76	1.4196e-74
SMPD3	438.981193794799	-1.81962	0.09876513093611	-18.4237378235511	8.47443002161118e-76	1.58629e-74
TXNDC12	1354.18035370666	0.79654	0.043236239847552	18.4229786007742	8.59415052707293e-76	1.60719e-74
LAMC1	1829.76398467422	1.63474	0.0887692370498976	18.415665903855	9.83720304542188e-76	1.83792e-74
ZC3H13	1644.64571490381	-0.908041	0.0493110747519455	-18.4145411332822	1.00436934238307e-75	1.87473e-74
GDF10	173.150040894012	-3.16263	0.171747822778625	-18.4143856290525	1.00725795928731e-75	1.87835e-74
RTN3	14397.2643987469	-0.853186	0.046344549451758	-18.409622073475	1.09987393255774e-75	2.04914e-74
TMEM70	428.288657158888	0.904534	0.049147117013599	18.4046171891336	1.20634049048313e-75	2.24483e-74
ZFP41	535.87305200964	-0.805919	0.0437890413672021	-18.4045796755906	1.20717610794703e-75	2.24483e-74
USP11	6479.87002063007	-0.779774	0.0423990457919975	-18.3913038574804	1.54226012789683e-75	2.86525e-74
INSIG2	515.721560923656	0.648465	0.0352814015285456	18.3797940707841	1.90691180238447e-75	3.53939e-74
HELZ	1230.56821016115	-0.706972	0.0384727912152228	-18.375901473235	2.04875689077718e-75	3.79911e-74
C20orf20	299.872847848846	0.739187	0.0402358820059388	18.3713490811219	2.22804268976722e-75	4.12771e-74
MDM2	1937.69859895537	1.34768	0.0733846272423719	18.3645828149374	2.52381652651378e-75	4.6713e-74
CCNYL1	367.613363150741	0.770397	0.0419590836840562	18.3606707452923	2.71236222566604e-75	5.01559e-74
KDELC1	118.664142069502	1.09998	0.0599138094311932	18.3594081640331	2.77616181801484e-75	5.12878e-74
DKFZp434J0226	26.9781100808791	-3.62411	0.197428941715398	-18.356506690302	2.9285036401892e-75	5.40519e-74
RNF7	914.582506383465	0.62051	0.0338082997279755	18.3537688237296	3.0798897344443e-75	5.67932e-74
IL1RAPL1	25.5510841587054	-2.27075	0.123818165901555	-18.3393888558904	4.01282794389728e-75	7.37906e-74
SLC7A14	841.285689966455	-2.37563	0.129570897922483	-18.3345818223375	4.38374478342427e-75	8.05366e-74
MORF4	4.55679636822863	0.961274	0.0524400422321687	18.3309072755636	4.69016198716478e-75	8.60636e-74
ZNF292	1138.90016488256	-0.93931	0.0512419926261056	-18.3308711878791	4.69327483187374e-75	8.60636e-74
APC2	8240.1164811564	-1.19206	0.0650580328353116	-18.3229518985961	5.42868150873888e-75	9.94394e-74
C10orf2	406.343950046262	-0.918928	0.0501518401155459	-18.322911389303	5.43272437842439e-75	9.94394e-74
ATP6V0A1	4078.63005580445	-0.853051	0.0465638825108413	-18.3200177910761	5.72941081207193e-75	1.04677e-73
SERPINB8	225.815835281199	1.37389	0.0749959240952436	18.3195424516992	5.77967011545384e-75	1.05498e-73
KIAA0664	1793.90662711615	-0.633095	0.0345729579547431	-18.3118610192232	6.65557174610367e-75	1.21374e-73
WDR77	689.412423094962	0.703052	0.0383961923858611	18.3104599790128	6.82904675001987e-75	1.24423e-73
SEPT3	6139.48249290591	-1.42863	0.0780490137963914	-18.3042466181381	7.65433905917987e-75	1.39331e-73
MGAT4C	109.280124865334	-2.4638	0.134616883846706	-18.3022748615906	7.93647603040733e-75	1.44335e-73
HFE	62.0095395926301	1.88722	0.103122559987869	18.3007249591035	8.16550914079826e-75	1.48364e-73
ABI2	4403.49841373845	-0.679771	0.0371489990410234	-18.2984932867166	8.50691232363443e-75	1.54425e-73
ABI1	2077.50813328961	-0.796882	0.0435610982152068	-18.293431706814	9.33490448466134e-75	1.69146e-73
ADSL	752.470243216841	0.750445	0.041026120122595	18.2918714663034	9.60598433021563e-75	1.73899e-73
S100A9	340.286275151614	2.92875	0.160167072941185	18.2856180894053	1.07735342725081e-74	1.94857e-73
PSPH	889.953062506386	1.57675	0.086250044078408	18.2811444691136	1.16946180665599e-74	2.11132e-73
GRIA4	3226.76933529974	-1.79914	0.0984203670277127	-18.2801341762396	1.19132649516911e-74	2.14716e-73
PNMA3	348.487487658439	-2.20903	0.120843079803614	-18.2801270647439	1.19148183736037e-74	2.14716e-73
TRIM17	40.0219824061517	-1.9628	0.107397795752064	-18.2760079793432	1.28493832669899e-74	2.31347e-73
TTBK2	227.679179053811	-1.52472	0.08343090759041	-18.27521798271	1.30368043319056e-74	2.34509e-73
PTS	240.124336003595	0.839626	0.0459730144385799	18.263463771516	1.61700010208784e-74	2.90606e-73
MDGA2	194.864460935943	-2.33558	0.127931345131298	-18.2565134009829	1.83650574511351e-74	3.29756e-73
PRKCDBP	68.9173188904593	2.08706	0.114344359329323	18.2523878224942	1.98059944872106e-74	3.55307e-73
DLG2	1090.20016147551	-1.80256	0.0987801955202195	-18.2481445663188	2.1405680413263e-74	3.83657e-73
GOLGA4	1592.18751432144	-0.760377	0.041690708148365	-18.2385292757835	2.55233890265513e-74	4.57046e-73
MINK1	3334.04659603807	-0.779186	0.0427276695119568	-18.2360943196241	2.66858917594181e-74	4.77432e-73
PVT1	34.8378711604041	2.11876	0.11619624270929	18.2343577030021	2.75471007362564e-74	4.92395e-73
NRAS	1332.43119980725	0.741271	0.0406589955099364	18.2314129604121	2.90712291897649e-74	5.18712e-73
SLC25A19	217.327363097715	0.923623	0.0506611251954571	18.2313892454588	2.90838386589284e-74	5.18712e-73
C1orf53	37.2684976973457	1.52266	0.0835870591812874	18.2165033401045	3.81785779892044e-74	6.79977e-73
ADRBK2	696.424644365694	-1.26765	0.0695982511247192	-18.2138317069314	4.00883038908445e-74	7.13349e-73
MYH14	1330.29123862797	-1.47797	0.0811492126981334	-18.2130385402701	4.06733951751414e-74	7.23111e-73
COQ2	169.628262530236	0.774776	0.0425455592402238	18.2105096624315	4.25963080464174e-74	7.56619e-73
MORN4	538.533151138829	-0.83294	0.0457427689586497	-18.2092076926943	4.36213775974039e-74	7.74133e-73
ZNF518A	507.464281109645	-0.848436	0.046598803409544	-18.2072462570041	4.52122781553783e-74	8.01648e-73
ERP44	884.380643945701	0.593362	0.03259296839834	18.2052028183576	4.69312406019549e-74	8.31383e-73
C9orf30	293.990770047005	0.696283	0.0382481866331385	18.2043326897542	4.76828391213266e-74	8.43944e-73
AGXT2L1	2440.22222904041	-2.72839	0.149916045931901	-18.1994811404005	5.20989070966468e-74	9.21282e-73
MDK	1485.10505788294	2.00422	0.110125422919414	18.1994101530718	5.21664610021815e-74	9.21654e-73
SLC38A6	125.307247663341	0.995487	0.0547072242340913	18.1966206989453	5.4891289759997e-74	9.68931e-73
HABP4	1564.70984980297	-0.83466	0.0458775129137334	-18.1932282830033	5.8397014683742e-74	1.0299e-72
TAOK3	1987.23168161379	-0.686145	0.0377240395836783	-18.1885469027047	6.36041708773087e-74	1.12073e-72
OAT	2080.28514110286	-0.854096	0.046972571647471	-18.182856301086	7.05610069838345e-74	1.24221e-72
ASNA1	2127.0945729588	0.651392	0.0358303164664613	18.1799051121635	7.44625060345245e-74	1.30973e-72
LDHD	310.289945090601	-1.43443	0.0789094684266628	-18.1781196126948	7.692661942116e-74	1.35188e-72
IKZF5	617.199276386946	-0.783188	0.0430910731600297	-18.1751823239368	8.1158390093592e-74	1.42498e-72
TM9SF1	1104.84357484612	0.670195	0.0368779618626062	18.1733192882012	8.39619613658367e-74	1.4729e-72
SDF4	2372.20895853003	0.753158	0.0414435635886876	18.1730955554065	8.43050725308098e-74	1.47761e-72
RIT1	657.048051087541	0.644605	0.0354728892116531	18.1717724192717	8.6362971666629e-74	1.51234e-72
DLG5	2903.02559762245	-1.04514	0.0575266506278579	-18.1679936648692	9.25200398081166e-74	1.61873e-72
JARID2	666.57321541447	-0.808846	0.0445211789385601	-18.1676731912318	9.30619233086443e-74	1.62678e-72
SLC30A7	391.994507984921	0.927325	0.0510492930542639	18.1652837992821	9.72031086869263e-74	1.69767e-72
CDK4	6786.56768124647	2.35644	0.129732205287174	18.1638414669149	9.97912954347149e-74	1.74134e-72
NTM	1642.65067524144	-1.29222	0.0711429999024343	-18.1636996655011	1.00049430410941e-73	1.74431e-72
MYO10	5468.91534582613	-0.948881	0.0522771328336501	-18.1509749932537	1.26141860012629e-73	2.19536e-72
MIB1	1831.01605256317	-0.86694	0.0477682027873201	-18.1488832303634	1.31037960325068e-73	2.27857e-72
HECTD1	2310.41821849707	-0.72164	0.0397634071338329	-18.1483541827374	1.32306012336365e-73	2.2986e-72
NCAM2	1347.91063964625	-1.37866	0.0759700944230621	-18.1474554295719	1.34488303068217e-73	2.33447e-72
C9orf129	71.6404880635997	-1.15272	0.0635307587241065	-18.1442520622514	1.42562506005269e-73	2.47246e-72
ZNF407	295.752206813079	-0.686287	0.0378270003232451	-18.1427715076762	1.46455864310408e-73	2.53776e-72
UNC13A	1895.63104567829	-2.01406	0.11106696361977	-18.1337604821312	1.72545732113339e-73	2.98723e-72
PSD	1945.51499443016	-2.16602	0.119460418787909	-18.1316616447174	1.79259590674133e-73	3.10075e-72
PRICKLE3	38.1017822966615	1.80466	0.0995589249119154	18.1265685435325	1.96654356236319e-73	3.39867e-72
NFKBIZ	150.304121863791	1.85743	0.102502476741247	18.1207896987198	2.18437192221493e-73	3.77185e-72
ZZEF1	1540.85639218812	-0.713861	0.0394059463159534	-18.1155769886998	2.40141741484342e-73	4.14302e-72
DDB2	248.994510386556	1.40503	0.0775634616236856	18.1145510043604	2.44660468749733e-73	4.21731e-72
DLGAP1	702.613836117516	-1.91585	0.105788367087205	-18.1101975871844	2.64796350370728e-73	4.56043e-72
RTN1	6588.27286814853	-1.72745	0.0953923740803939	-18.1088670200448	2.71274174073354e-73	4.66794e-72
KCTD14	57.7331222699012	1.82922	0.101018772682485	18.1077027470586	2.77071866268386e-73	4.76357e-72
FAM22A	76.1396833143831	-1.35394	0.0747769913612822	-18.1064248660007	2.83577581252e-73	4.87119e-72
MSR1	692.51065352683	2.24155	0.123831630218151	18.1016211499494	3.09425103707033e-73	5.31059e-72
PPP1R3F	477.815143980478	-1.10163	0.0608626957702683	-18.1002817589059	3.17041878669465e-73	5.43661e-72
NF2	1350.6273295929	-0.60054	0.0331822037549986	-18.0982561015036	3.28917855019001e-73	5.63052e-72
IFI30	1313.52139679327	2.26181	0.124977721997003	18.0977128311346	3.3217766961434e-73	5.67674e-72
PI3	101.595166335951	6.28491	0.347276292905538	18.0977106229278	3.32190985147206e-73	5.67674e-72
FAM169A	1113.71567206126	-1.00879	0.055752918009496	-18.0938871245944	3.5606358969523e-73	6.07946e-72
IGFBP2	3552.22394787064	3.03995	0.168027991631321	18.0919427631537	3.68851942024068e-73	6.29239e-72
CCDC85C	969.850307493156	-0.887158	0.0490452184638063	-18.0885625797275	3.92183334646918e-73	6.68465e-72
MFSD6	1296.40947320018	-1.15143	0.0636669879238381	-18.0852478691643	4.16490827592304e-73	7.09287e-72
TICAM2	75.3918596830783	1.47203	0.0813954720872227	18.0849165880162	4.19001245791347e-73	7.1295e-72
BIRC6	1696.05609598686	-0.851959	0.0471240858384524	-18.0790666042718	4.65901773805409e-73	7.92073e-72
DNAJC5	3709.70758962168	-0.682111	0.0377456012760219	-18.0712636061132	5.36702748452581e-73	9.10878e-72
USP43	203.769821844455	-2.17455	0.120332953517396	-18.0711078754306	5.38219895267954e-73	9.12672e-72
FBLIM1	268.427282175105	2.08068	0.115139957575298	18.070837700753	5.4086211931366e-73	9.16368e-72
C1orf85	522.53075653711	1.25088	0.0692347308275393	18.0672579616424	5.77116284970375e-73	9.76958e-72
ACO2	5656.7681937238	-0.825483	0.0456976423628384	-18.0640245434965	6.11940743486419e-73	1.03503e-71
COL1A1	3836.62976539624	3.55004	0.196568742947054	18.0600671217697	6.57426101458779e-73	1.11101e-71
FKBP11	139.162798560307	1.13727	0.0629904514453457	18.0546015317416	7.25838255928054e-73	1.22558e-71
LSAMP	2451.19593786464	-1.06721	0.059130721189566	-18.0483664782206	8.12586594764677e-73	1.37089e-71
ATP6V0E1	2637.40190605383	0.833774	0.0462446698483582	18.0296195751279	1.14073799145879e-72	1.92286e-71
EML5	95.0256441077469	-1.07907	0.0598503712183607	-18.0295382416856	1.14241712787389e-72	1.92406e-71
ATG2B	831.964953879783	-0.780677	0.0433000154892926	-18.0294803350656	1.14361411686844e-72	1.92444e-71
SELL	1653.31783173205	-2.88784	0.16019115963029	-18.0274474892545	1.18643698695283e-72	1.9948e-71
MAD2L1	275.005404434726	1.4842	0.0823400921406124	18.0252208944498	1.23517764199009e-72	2.07499e-71
RBBP6	1427.72688848245	-0.591996	0.0328639978250684	-18.0135263490998	1.52590586342101e-72	2.56122e-71
COL5A2	1092.47203469174	2.37684	0.131976225637435	18.0095747980906	1.63882555622662e-72	2.74843e-71
MPDZ	2001.30788306146	-0.985806	0.0547501258755213	-18.0055469968456	1.76249963972408e-72	2.95085e-71
USP46	1564.45625230095	-1.01321	0.0562851854043417	-18.0013500762509	1.90127325525483e-72	3.1805e-71
AATK	1479.63187026369	-1.8492	0.102797012816363	-17.9888374966468	2.38304705191486e-72	3.98306e-71
SAMD8	215.928145205763	-1.43785	0.0799313267554669	-17.9885768743985	2.39428009722162e-72	3.99847e-71
MVD	918.279558510197	-1.1091	0.0616822480544606	-17.9808351348902	2.75314350044345e-72	4.5939e-71
EFR3B	1638.06045363724	-0.992534	0.055220643208365	-17.9739583671255	3.11662262653236e-72	5.19603e-71
DYNLT1	1256.35511061281	0.987702	0.0549626127130092	17.9704309663162	3.3212463895557e-72	5.52788e-71
MGAT2	549.076151672992	0.605348	0.0336915083325267	17.9673783963214	3.50910252758224e-72	5.83565e-71
SYDE1	502.251454777305	1.13399	0.0631214112299575	17.9652660497541	3.64526209719581e-72	6.057e-71
GINS4	99.307736465487	1.41523	0.0787899691457349	17.9620622642736	3.86189213856231e-72	6.41158e-71
C6orf174	2079.61853611869	-1.3418	0.0747055715477647	-17.9612340359004	3.91995208592678e-72	6.50253e-71
LRRC4	1064.85142190344	-1.23641	0.0688470354869918	-17.9587265395691	4.10108994507745e-72	6.79732e-71
ARHGAP5	2797.7680375507	-0.881497	0.0490919043682359	-17.956061246819	4.3027829324149e-72	7.12565e-71
CMTM6	1074.71190044047	0.873981	0.0486777351200882	17.9544227450272	4.43165188424861e-72	7.3316e-71
NKD1	393.719001774974	-1.65137	0.0919758699428116	-17.9543866047787	4.43453728450373e-72	7.3316e-71
ATG10	77.4744969324548	0.757318	0.0421839918944178	17.9527376134628	4.56820263919109e-72	7.54629e-71
LOC649330	11.3804090425672	-1.43472	0.0799192237661584	-17.9520699495678	4.62345826501052e-72	7.63121e-71
ICAM3	141.690651495914	0.90266	0.0503018743093561	17.9448616460541	5.2641522263609e-72	8.68147e-71
SGCD	358.807129362209	-1.9773	0.110249249081913	-17.9348281630309	6.30583315941986e-72	1.03907e-70
RIPK1	611.240337203916	0.687697	0.0383456261752207	17.9341689611284	6.38105912042639e-72	1.0506e-70
BCL7A	1122.00246993067	-1.29299	0.0721013041887896	-17.9329231499831	6.52567857670617e-72	1.07351e-70
C16orf5	3179.29906006993	-0.910894	0.0507965616036145	-17.9321999877864	6.61112062717967e-72	1.08667e-70
SH3GL2	1645.52814336592	-2.13073	0.118830782928997	-17.9308204850607	6.77721467321463e-72	1.11305e-70
PEX2	1010.57790809901	0.644432	0.0359429607772013	17.9293041819939	6.96458248301556e-72	1.14287e-70
ZNF276	918.835078769159	-0.972943	0.0542666392403675	-17.9289318090537	7.01138054287568e-72	1.1496e-70
TMEM194B	53.9766900221737	1.01863	0.0568217109965696	17.9268311404006	7.28131599635041e-72	1.19287e-70
TBC1D5	2501.9816126287	-0.707316	0.0394584216870558	-17.9256002499598	7.44427339914947e-72	1.21856e-70
DPH3	751.848268321582	0.643206	0.0358871910896103	17.9229900974116	7.80195964359151e-72	1.27606e-70
DGCR14	698.168888370815	-0.675849	0.0377168488669988	-17.919033728707	8.37705551605584e-72	1.36899e-70
ERBB4	886.92243071443	-1.8067	0.100856724335457	-17.9135517214347	9.24439878014461e-72	1.50949e-70
CYFIP2	3645.80549075727	-1.23486	0.0689742973741596	-17.9031964537002	1.11343900809192e-71	1.8166e-70
NRP1	1011.94939144053	1.41571	0.0790850478570069	17.9011478013	1.15516419250907e-71	1.88313e-70
DOCK3	1033.82578002815	-1.51669	0.0847321443510137	-17.8997723568482	1.18404903061692e-71	1.92863e-70
TDH	28.9831310673231	-2.30592	0.128841751411515	-17.8973116071022	1.2375336626964e-71	2.01409e-70
CYP2A6	3.37516591815016	-3.86167	0.215802240344871	-17.894473338038	1.30222117007575e-71	2.11763e-70
P2RX6	225.467912939893	-1.69295	0.0946125110671053	-17.8935342735215	1.32435715990728e-71	2.15186e-70
PPP4C	1332.85985503731	0.775728	0.0433576104964256	17.8913869653219	1.37639406144392e-71	2.23458e-70
MAGOH	329.801139163339	0.813796	0.0454873741064745	17.8905939060998	1.39612389428303e-71	2.26476e-70
C7orf51	611.312251877605	-1.27792	0.0714630569453458	-17.8823115855846	1.61979773064524e-71	2.62545e-70
PIKFYVE	1274.29716792623	-0.809034	0.0452552056927565	-17.8771567289104	1.77669568410201e-71	2.87741e-70
ICK	890.667828201497	-0.940604	0.05262528958939	-17.873610461479	1.89334165277283e-71	3.06381e-70
KCNK4	66.9024451044866	-2.18728	0.12238248187186	-17.87253292471	1.93027435690587e-71	3.12103e-70
RAB34	555.459120911172	2.08976	0.11699062836792	17.8626503398408	2.30432968846145e-71	3.7228e-70
ANKRD11	2497.89761799556	-0.612875	0.0343162393649096	-17.8596278079505	2.43255919120095e-71	3.92676e-70
SLC25A24	159.116723196796	1.51572	0.0848724970951663	17.8587511997342	2.47106235617445e-71	3.98567e-70
ASPN	51.5014192903438	2.59489	0.145330581889788	17.8551015085595	2.63800658712261e-71	4.25148e-70
CALCOCO1	2417.08811150229	-0.587255	0.0328941789766584	-17.8528460227918	2.74675024606954e-71	4.42314e-70
RHBDL3	1221.81910126953	-1.743	0.0976574718227162	-17.848049068976	2.99311103364117e-71	4.81204e-70
IFT20	319.93962308397	0.846794	0.0474478047275355	17.8468443264375	3.05836967825652e-71	4.91297e-70
B2M	29768.7608167879	1.28977	0.0722771246754738	17.8447729590837	3.17390460665058e-71	5.09444e-70
HOOK3	1335.01962870297	-0.633674	0.0355130409780148	-17.8434274135118	3.25127607027973e-71	5.2144e-70
TMED9	2524.7045238672	0.714449	0.0400468198234641	17.8403527294786	3.4352063417181e-71	5.50494e-70
MECP2	1850.57488570422	-0.636581	0.0356891910457125	-17.836813140846	3.65982537623992e-71	5.86015e-70
CCBL1	497.562549206939	-1.06054	0.0594708131621927	-17.8328660698862	3.92760864959303e-71	6.27879e-70
DBC1	930.247810613919	-2.17799	0.122133480604856	-17.8328975130471	3.92540009119968e-71	6.27879e-70
CCT6A	4529.03022187918	1.23	0.0689831885248838	17.8303891202768	4.10553820913059e-71	6.5568e-70
MMP14	2321.65615165768	1.92439	0.107927679823776	17.8303538599663	4.10812826444464e-71	6.5568e-70
KIAA0195	3502.75997616615	-0.690442	0.0387325073360349	-17.825897550715	4.44892977388952e-71	7.09502e-70
TMBIM1	2055.64229344392	1.47308	0.082639383210588	17.8253684549826	4.49122067983903e-71	7.15671e-70
PFN1	6015.87259884833	0.859322	0.0482108855951007	17.8242368370504	4.58302146692771e-71	7.29713e-70
LXN	76.9184998795065	1.70099	0.095432119568362	17.8241350123099	4.59137300960771e-71	7.30456e-70
TFB2M	184.485862679363	0.617411	0.0346593264534506	17.8137152880202	5.53133129239876e-71	8.78586e-70
DYRK3	112.866762064604	1.28832	0.072343686317215	17.8083218619782	6.09087574782769e-71	9.66689e-70
TIPIN	112.750596636639	0.740215	0.0415694131929995	17.8067224339746	6.26740868750257e-71	9.93911e-70
TBRG1	1210.45885328842	-0.639057	0.0358895272237705	-17.806237331732	6.32195198517538e-71	1.00176e-69
PRKCE	779.612449316285	-1.5085	0.0847436549868041	-17.8007038318595	6.97862844995244e-71	1.10493e-69
ZNF584	247.182474482167	0.697836	0.0392210063455355	17.7924003079164	8.09373395207644e-71	1.28046e-69
ZFYVE16	1348.07838331635	-0.82742	0.0465083174622297	-17.7907975707077	8.32859652264095e-71	1.31657e-69
C7orf36	295.873523959378	0.737244	0.0414537645344659	17.7847243024812	9.28187993402957e-71	1.46609e-69
EIF2B3	428.843516158245	0.681914	0.0383461711805544	17.7831046810097	9.55397998840835e-71	1.50787e-69
RPPH1	74.7404568504865	2.56212	0.144178539492826	17.7704629143742	1.1969891805954e-70	1.88766e-69
INPP5A	607.803077226637	-0.893343	0.050274984081224	-17.7691278395283	1.22581760961589e-70	1.93159e-69
C19orf59	5.31828497985448	5.08494	0.286219574755018	17.7658788341035	1.2988983656377e-70	2.04512e-69
SPEN	2600.81790917992	-0.89907	0.0506092344006086	-17.7649342261426	1.32094934396585e-70	2.07819e-69
KIF5C	5312.06402738983	-1.48019	0.0833238212902477	-17.7642604570501	1.33690548755805e-70	2.10162e-69
TEAD3	134.629668692176	1.93747	0.10907060566975	17.7634891814295	1.35540675374086e-70	2.12902e-69
RBBP8	492.432280080444	1.04521	0.0588432369162258	17.7625735383256	1.37770272460717e-70	2.16233e-69
LOXL1	160.627796126523	2.85058	0.160494977659956	17.7611936070477	1.4119967030507e-70	2.2144e-69
MR1	121.632715475715	1.46774	0.0826660226826068	17.7550955186531	1.57402619469874e-70	2.46656e-69
GPIHBP1	289.643366646684	-2.0272	0.114192283680676	-17.7524835015067	1.64897882109165e-70	2.58197e-69
VAMP5	705.124060388765	1.54492	0.0870578218564039	17.7458673613624	1.85513535296601e-70	2.90019e-69
RSRC1	234.088149406897	0.669243	0.0377137386441217	17.74534234685	1.8725549104634e-70	2.92511e-69
CACNA1I	172.715353397545	-2.69754	0.152039004961542	-17.7424311816411	1.97214579551809e-70	3.07826e-69
CNN3	10294.7079275813	1.1836	0.0667177393126942	17.7403356727748	2.04708491372105e-70	3.19271e-69
CHD8	1952.09616175711	-0.663513	0.0374140678481235	-17.734310149619	2.27875905458848e-70	3.55125e-69
CACNA1A	729.927167388917	-1.73488	0.0978565933333172	-17.7288301416842	2.51207042573357e-70	3.90869e-69
DOCK10	1664.66982624451	-1.0848	0.0611881658234503	-17.7288395530826	2.51164998892521e-70	3.90869e-69
GNS	2826.64422920426	1.07022	0.0603775958400552	17.7253772427163	2.67115441028139e-70	4.14646e-69
ARRDC3	1325.73439106169	0.955844	0.0539330038394583	17.7228099874933	2.795908090243e-70	4.33672e-69
TMEM30A	5894.6757509756	-0.664389	0.0374910992418087	-17.7212369931947	2.87519873401926e-70	4.45622e-69
CD248	343.466719068146	2.34328	0.132234615149597	17.7206308491898	2.90634775265069e-70	4.50098e-69
UBQLN4	2300.36924082507	-0.635703	0.0358789872758173	-17.7179718289743	3.04701471106323e-70	4.71514e-69
DEGS2	52.8567521193612	-1.74137	0.0983047428300005	-17.7140339778643	3.26789547426183e-70	5.053e-69
TBC1D12	624.809294448771	-0.839012	0.0473690422925728	-17.7122396399531	3.37376796049943e-70	5.21264e-69
RARRES1	52.3034143262644	2.59711	0.14664126944347	17.710626178107	3.47188424134295e-70	5.36006e-69
SGSM2	2846.20285253582	-0.802391	0.0453318756517351	-17.7003674777333	4.16580115496771e-70	6.42636e-69
PRRT1	534.207877143977	-1.6068	0.0907811466553817	-17.6997401328075	4.21246450938631e-70	6.49329e-69
WAPAL	974.249264550548	-0.604134	0.0341355568122424	-17.698074977621	4.33886498336239e-70	6.68293e-69
MRPS23	765.349202721222	0.666854	0.0376917512701512	17.692295431496	4.80764563654502e-70	7.39922e-69
STX1B	1585.74431203625	-1.84124	0.104073208108158	-17.6917995034535	4.85014852852335e-70	7.45884e-69
AHNAK	10058.491591504	-1.52731	0.0863399407223229	-17.68946262155	5.05552401925543e-70	7.76866e-69
ATP1B3	1803.89215954783	0.661117	0.0373986251788138	17.6775823125181	6.24158915323885e-70	9.57639e-69
MMS19	1133.43885667379	-0.611349	0.0345877815463915	-17.6752817462304	6.5014807218103e-70	9.96743e-69
AFF2	297.402649809106	-2.50012	0.141455149556613	-17.6743226298549	6.6129911417372e-70	1.01227e-68
CDK2	409.773229212133	1.37886	0.0780147803341586	17.6743392333708	6.61104463292114e-70	1.01227e-68
TIFA	100.269059385906	1.48138	0.0838202463704904	17.6732802275285	6.7363476694846e-70	1.03036e-68
EFEMP2	945.017755900193	1.9263	0.10899596702752	17.6731449192578	6.75252716035774e-70	1.03204e-68
KTN1	3725.59603046936	-0.663945	0.0375740383326937	-17.6703076730849	7.10085647787976e-70	1.08444e-68
GINS1	267.433350801038	1.48432	0.0840033090217436	17.6697690940491	7.16897299032737e-70	1.094e-68
CISH	68.2865405979666	2.02503	0.114663584390126	17.6605990905743	8.43397366064057e-70	1.28605e-68
ATF5	578.358455742624	1.17708	0.0666536483383593	17.6596708136729	8.57382330122225e-70	1.30637e-68
LIMCH1	3208.69970906661	-1.12125	0.0635052126880639	-17.6559589691329	9.15651552916552e-70	1.39408e-68
TNKS2	1624.45471838804	-0.761114	0.0431102745627092	-17.6550488630453	9.30531097387654e-70	1.41456e-68
RP9	191.440785975743	0.803396	0.045511031396947	17.652785266117	9.68592763437908e-70	1.4713e-68
SCN2B	634.14415028037	-2.17317	0.123117814481374	-17.6511723616946	9.96656332194748e-70	1.51277e-68
LOXL2	610.39292432493	2.17005	0.122953649210769	17.64933907921	1.02953973704747e-69	1.56148e-68
CLN5	763.678949316616	0.818174	0.0463585605482309	17.6488279086725	1.03889984987539e-69	1.57447e-68
KCNN3	462.458808782433	-1.79768	0.101863354465085	-17.6479322465772	1.05550542842801e-69	1.59842e-68
SLC39A8	468.634311242588	1.27969	0.0725362204938303	17.6420226616741	1.17190077193593e-69	1.77333e-68
LRRC42	424.821139122595	0.883745	0.050099358678327	17.6398555445031	1.21771855704633e-69	1.84125e-68
TMEM159	139.284360436429	1.46561	0.083091125832356	17.6385848685022	1.24540949542123e-69	1.88169e-68
POPDC2	34.4235339726452	0.966627	0.0548399378287787	17.6263338784	1.54677152463609e-69	2.33346e-68
HMOX1	1539.52238593461	1.86131	0.105599135685335	17.6262080643516	1.55021649678911e-69	2.33688e-68
SHISA5	2975.35880373728	0.838344	0.0475776074942002	17.6205593295525	1.71302859257365e-69	2.58035e-68
SLC16A9	914.237608288769	-1.26837	0.0719905992888627	-17.6185418525272	1.7752188753312e-69	2.67006e-68
ZER1	2157.23569223436	-0.701793	0.0398326498699723	-17.6185399776075	1.77527770544753e-69	2.67006e-68
SART1	1849.26875471971	-0.771933	0.0438239008508543	-17.6144374407787	1.90877287451923e-69	2.86866e-68
RPL39L	69.1683169268975	2.19347	0.1245410591046	17.6124350495155	1.97751798698321e-69	2.96972e-68
SRPR	1436.7630001232	0.692659	0.0393372204544639	17.608241586649	2.12958564900023e-69	3.19567e-68
ABLIM3	1190.71531622142	-1.53405	0.08714027108973	-17.6044001939741	2.27909177423738e-69	3.41743e-68
DDX51	811.494115405064	-0.711397	0.0404167347763047	-17.6015462914292	2.3968977219101e-69	3.59136e-68
PSRC1	1191.81921281899	1.64325	0.0933709186108523	17.5991932883533	2.4985782012551e-69	3.74088e-68
ALOX5AP	699.573233720408	2.06943	0.117588479071144	17.5989139029888	2.51093336534887e-69	3.75655e-68
CSNK1E	4423.85806551695	-0.887239	0.0504166034874936	-17.598156571239	2.54473172656674e-69	3.80424e-68
CTBP2	1123.26672108263	-0.64606	0.0367204774446996	-17.5939991122648	2.73851273069574e-69	4.09085e-68
SYNGR1	2567.49828989383	-1.506	0.0856016841617145	-17.5931395354865	2.78037703996126e-69	4.15026e-68
UBE2T	191.93718996196	1.77958	0.101179298651673	17.5883828879286	3.02384222174678e-69	4.50689e-68
BST1	49.1507054963711	1.69999	0.0966579209680807	17.5877286937055	3.05894854687764e-69	4.55579e-68
PDCD2	561.284408069392	0.646253	0.036746212398629	17.5869194241584	3.10293938855112e-69	4.61784e-68
CLEC2B	101.482322930985	1.8062	0.102704352180138	17.5863664679901	3.13335945261878e-69	4.65961e-68
ALCAM	4059.94330463796	-1.1304	0.0642911617591488	-17.582578791741	3.34987842308207e-69	4.97786e-68
NAP1L2	635.612162616479	-1.83318	0.10430622550565	-17.5749354431671	3.83326399392943e-69	5.68763e-68
ZNF20	125.012267148749	0.758362	0.0431602067721809	17.5708591360149	4.11887336924757e-69	6.10684e-68
PCDHGA3	209.771611077317	-3.0277	0.172362031657648	-17.5659540680131	4.49080206153356e-69	6.6533e-68
IL17D	1479.45096607545	-1.56101	0.0888781582744029	-17.5634564190471	4.6928640906049e-69	6.94747e-68
C1orf144	2479.19786186929	0.710662	0.040482579851948	17.5547672157455	5.46907481440784e-69	8.09056e-68
CLTCL1	218.603407058819	-1.04631	0.0596091995159429	-17.5528816863014	5.65372401019251e-69	8.35748e-68
CDCP1	116.415990356359	1.97535	0.112542766285024	17.5520173464413	5.74043307047871e-69	8.47933e-68
SASH1	2540.53825910621	-1.11843	0.0637274964557247	-17.5501753424273	5.92966741069349e-69	8.75233e-68
H2AFZ	2565.00506712639	0.800734	0.0456275258435075	17.5493683107326	6.01452296720528e-69	8.87097e-68
FBXO22	316.71576355126	0.804196	0.0458544956865686	17.5380028481047	7.34641792122023e-69	1.08274e-67
LASS5	1019.35633736247	0.645343	0.0367996174334388	17.5366686358562	7.52090860985881e-69	1.10763e-67
PEX5	2036.14205688427	-0.613235	0.0349778439168602	-17.5321102650564	8.14882307247701e-69	1.19832e-67
CECR6	450.585733293875	-1.23203	0.0702889153953493	-17.5281385595722	8.73836510553169e-69	1.28407e-67
LCOR	53.3208256422425	-1.65971	0.0947107588992142	-17.523983051048	9.40073984996145e-69	1.38038e-67
PFKFB4	389.152631258745	0.911019	0.0519878031392765	17.5237101827841	9.44594516806025e-69	1.38599e-67
SMCR5	7.14203777982997	-2.82425	0.161184977227496	-17.5217997424205	9.76856983897024e-69	1.43227e-67
NFE2L3	138.773379254018	1.59872	0.091245497825009	17.5210407454211	9.8997729084853e-69	1.45043e-67
SPIN2B	151.383319442198	-0.708111	0.0404215526327084	-17.5181638300473	1.0413232881072e-68	1.52453e-67
MTMR9	880.054644163239	-0.78542	0.0448377366387611	-17.5169344802103	1.06406578927519e-68	1.55668e-67
ATAD1	1046.94719501925	-0.811715	0.0463450986946767	-17.5145807764636	1.10899881485904e-68	1.62122e-67
STC1	134.796272499175	3.28757	0.187722853625123	17.5129047698659	1.14214248426531e-68	1.66844e-67
DAB2IP	2111.33937625751	-0.739366	0.0422271751634852	-17.509251049685	1.21785822442756e-68	1.77773e-67
OMG	1658.66860671762	-1.44762	0.0826957790959112	-17.5053424960246	1.30440081582563e-68	1.90266e-67
SNORD115-26	10.6196798720276	-3.6194	0.206803922369236	-17.5016041539894	1.39290287062592e-68	2.03026e-67
LOC90110	279.305339507849	-0.671318	0.0383613726608225	-17.4998529109048	1.43639631692837e-68	2.09211e-67
RFTN2	1769.84062609746	-1.07805	0.0616038448280668	-17.4996960196575	1.4403582803269e-68	2.09635e-67
CHI3L2	2420.48776137963	3.15259	0.180178158441763	17.4970877114634	1.50784456261739e-68	2.19296e-67
ZFAND2A	550.643420033574	0.886184	0.050652577679361	17.4953394516067	1.55483339233059e-68	2.25964e-67
PPIC	194.326307414596	1.64379	0.0939740923350658	17.4919839270389	1.64914898541059e-68	2.39495e-67
NMT2	422.487139031898	-0.779975	0.0446027069692463	-17.4871649363156	1.79465938743408e-68	2.60436e-67
BCL10	222.161218034131	0.670191	0.0383260723885144	17.4865509431878	1.81409540485018e-68	2.63064e-67
CENPN	245.254470236937	1.26637	0.0724218542151664	17.4860473581627	1.83019294516596e-68	2.65204e-67
H3F3A	3213.53476800508	0.858783	0.0491187871375459	17.4838024204181	1.90370412907345e-68	2.75655e-67
HRH3	183.309836690889	-2.91102	0.166531711080379	-17.4802510236733	2.02605181421291e-68	2.93156e-67
CUEDC1	829.600303906872	-0.703441	0.040252811465985	-17.4755741745035	2.19920603819789e-68	3.17979e-67
FAM70B	38.8010502332875	1.67308	0.0957618080638077	17.471249158731	2.37243086025948e-68	3.42775e-67
GPT2	3501.21921485833	-0.912162	0.0522131646672038	-17.4699636584614	2.42649222218029e-68	3.5033e-67
PID1	1810.66334628639	-1.44191	0.0825468062972676	-17.4678270299179	2.51907745845251e-68	3.63433e-67
SPRY1	399.48222910123	1.89672	0.108589972776252	17.4668143244789	2.56418220780799e-68	3.69671e-67
SLC9A2	26.9229477670851	-2.51653	0.144102515710161	-17.4634635068673	2.71924077675833e-68	3.91741e-67
VWA5B2	162.401916197214	-2.29738	0.131554529584489	-17.4632951853096	2.72727176141015e-68	3.92612e-67
CTHRC1	132.345335156036	2.80478	0.16069448993278	17.4541236707502	3.20254721142063e-68	4.60697e-67
PTPRD	2101.20815981686	-1.38381	0.0792995527116714	-17.4503651373863	3.42039249514775e-68	4.91678e-67
CHPF2	975.890724749348	0.877964	0.0503179732534976	17.4483168081363	3.54526862606152e-68	5.0926e-67
TMEM50B	1180.81986606289	0.710804	0.0407385879081447	17.4479202171009	3.56996675471379e-68	5.12436e-67
SQRDL	287.990466011621	1.51342	0.0867410311618409	17.4475509005436	3.59312052212082e-68	5.15387e-67
PTTG1	293.443330796146	2.11983	0.121518027742616	17.4445461849188	3.78714554599161e-68	5.42824e-67
AQP9	63.075007474912	3.09148	0.177220695381987	17.4442350258809	3.80782546795087e-68	5.45394e-67
PCDH15	1005.84070658584	-2.64792	0.151832406718121	-17.4397271630934	4.12036238740556e-68	5.89307e-67
GPR61	33.156778895489	-2.45425	0.140756565147034	-17.4361178533133	4.38893070766288e-68	6.27266e-67
SPTBN4	679.156303241093	-1.39979	0.0802927300755306	-17.4335935792412	4.58706241740124e-68	6.55111e-67
DDHD2	1325.14373580315	-0.674097	0.0386775983596568	-17.4286125713949	5.00455344737776e-68	7.14221e-67
SCN11A	14.6174442389386	-1.84784	0.106034185670951	-17.4267880337521	5.16678013292368e-68	7.36842e-67
ZFYVE27	850.742748745719	-0.703048	0.0403505347421833	-17.4235149042267	5.47105296447611e-68	7.79674e-67
MYOM1	242.400922222123	-1.93554	0.111094651287873	-17.4224611881777	5.57275789163485e-68	7.93598e-67
MMD2	613.404701110061	-2.21372	0.127096497422683	-17.4175971644909	6.06721028376789e-68	8.63391e-67
ZNF534	17.1291970006451	-1.398	0.0802746939515661	-17.4152632000358	6.3197609152686e-68	8.98685e-67
IGFBP3	2939.68198323061	2.50945	0.144176987860292	17.4053321782202	7.51687228245482e-68	1.06739e-66
DCBLD2	688.715203630734	1.29166	0.0742423893687429	17.3978581750144	8.56459135624395e-68	1.21529e-66
TGFB1I1	392.856173664019	1.34927	0.0775540307460788	17.3977827681587	8.57587167357762e-68	1.21602e-66
DACH2	148.500713899894	-2.9071	0.167101073885074	-17.397265400265	8.65366651636626e-68	1.22617e-66
CNTN1	3826.0297060752	-1.8231	0.104815390082454	-17.3934077366065	9.25634058843729e-68	1.31063e-66
ARHGAP21	4872.58300018087	-0.81126	0.046646621166701	-17.3916097953925	9.55134704201102e-68	1.35144e-66
FLJ35220	326.957956560555	-0.757368	0.0435482131625794	-17.3914829022307	9.57251827190121e-68	1.35347e-66
TTLL12	1148.40670646903	-0.879938	0.0505963069746865	-17.3913567086105	9.59361917548143e-68	1.35548e-66
ANG	68.4644479474779	1.86054	0.106991761212375	17.3895503619991	9.90079036960974e-68	1.39789e-66
MYL12A	1300.85929521714	1.31292	0.0755076692718761	17.3878661909611	1.01960090297542e-67	1.43854e-66
SGIP1	384.01852879443	-1.38184	0.0795092470060688	-17.3796003866003	1.1777127526339e-67	1.65926e-66
LOC150786	56.8367102219452	-0.902856	0.0519505041466989	-17.3791671422016	1.18664322185786e-67	1.66947e-66
SH2B1	1678.04517671143	-0.610808	0.0351500630150671	-17.3771494912698	1.22913036952758e-67	1.72802e-66
STEAP3	818.612669568255	2.28834	0.131689922751279	17.3767328958637	1.23809000600655e-67	1.73938e-66
NCRNA00219	512.975335129299	-1.13654	0.065446128765746	-17.3660483561535	1.49150584248326e-67	2.09392e-66
IRAK4	346.195930837392	0.794097	0.0457307644243302	17.3646219423	1.52903681160036e-67	2.14509e-66
SCN3B	1710.36200301487	-2.28984	0.131951218967286	-17.3537103943629	1.84906082379027e-67	2.59038e-66
ACSL6	715.756016794813	-1.75326	0.101037062114576	-17.3525949122256	1.8853223993395e-67	2.63746e-66
PDE11A	37.696579453724	-1.99327	0.114869306174359	-17.3524962184516	1.88856461773911e-67	2.64013e-66
KIF3C	3154.36085625282	-1.27581	0.0735300662668837	-17.3509024890328	1.94169682163739e-67	2.71249e-66
SLC43A3	503.828831543507	1.83468	0.105739892148577	17.3508337571613	1.94402143879003e-67	2.71383e-66
POLE2	34.8605267559898	2.104	0.121269353103105	17.3498182120074	1.97869378572827e-67	2.76028e-66
RIMS2	273.912600457933	-2.74157	0.158056796535679	-17.3454685896156	2.134306382412e-67	2.97527e-66
CYTL1	167.256266315189	1.99644	0.115128344220631	17.3410003345347	2.30687007866735e-67	3.21357e-66
UNC5A	615.70244694402	-2.05049	0.118272646193325	-17.336969635792	2.47443188833717e-67	3.44215e-66
HAR1A	48.7394133090647	-2.52575	0.145698243164155	-17.3354853898036	2.53914423915931e-67	3.5297e-66
PYGL	774.589363821434	1.62101	0.0935103408290453	17.335037721868	2.55899142523505e-67	3.55479e-66
BTBD9	723.964750124069	-0.887937	0.0512325176826304	-17.3315203742557	2.72040827368152e-67	3.77373e-66
USP27X	207.693595233059	-0.977822	0.0564249720312354	-17.3296016248714	2.81270024279583e-67	3.89903e-66
CECR2	284.899528779369	-1.38974	0.0801987568932662	-17.3286650535519	2.85887623751352e-67	3.96027e-66
KIF4B	5.70095012317876	1.91991	0.110861391398555	17.3180916384702	3.43563663871729e-67	4.75591e-66
PTPN2	258.560024357519	0.762404	0.0440261205143138	17.3170758972927	3.49680851331953e-67	4.83721e-66
TRIP13	128.87579223345	1.63894	0.0946451159119875	17.316665274906	3.52184482593825e-67	4.86845e-66
TMEM218	413.40011931501	0.772899	0.0446363344568343	17.3154711350844	3.5956733163166e-67	4.96704e-66
OSGIN2	1589.34766544837	-1.17239	0.0677116850965892	-17.3145019976002	3.65672329679384e-67	5.04786e-66
SLC1A4	3936.07249548501	-1.35854	0.0784687027807072	-17.3131564203162	3.7432034207846e-67	5.16364e-66
UBN2	741.044211987271	-0.813758	0.0470058430396315	-17.311853900694	3.82885726339573e-67	5.27813e-66
CBFA2T3	104.57732314668	-1.52332	0.0880069488322315	-17.3090436281957	4.02037327039006e-67	5.53828e-66
ATG2A	1001.12667712586	-0.584699	0.0337848492656907	-17.3065577633815	4.19772322055176e-67	5.77857e-66
SDC1	237.032033351755	2.2635	0.130845605619292	17.2989882163658	4.78722562766002e-67	6.58551e-66
SERPINE1	1880.42542062114	2.94448	0.170288692879648	17.2910858641217	5.49081352004668e-67	7.54816e-66
CCNA2	211.41039043379	1.94622	0.112660079685899	17.2751606599285	7.2371613880621e-67	9.94194e-66
NPC2	2619.03513435796	1.3304	0.0770324243845555	17.2706729824814	7.82248619848508e-67	1.07386e-65
BRD1	768.809018292719	-0.640916	0.0371185818818803	-17.2667080357538	8.37876022188146e-67	1.14863e-65
PHF10	1787.75872588873	-0.600595	0.0347864013785674	-17.2652135761004	8.59851251168902e-67	1.17794e-65
SLC14A2	29.4834978249945	-3.62558	0.210071935079555	-17.2587548169099	9.61622632951128e-67	1.31554e-65
BIRC3	87.7681413611905	2.11111	0.122357929714531	17.2535884642472	1.05160303850029e-66	1.43666e-65
PIGF	371.144209256806	0.593461	0.0344072287941963	17.2481502551228	1.15539548563097e-66	1.57737e-65
ANKS1A	1024.6760648964	-0.651445	0.037775608136323	-17.2451211249881	1.21757292982333e-66	1.66111e-65
ZNF397	349.991861282267	-0.717496	0.0416083825075205	-17.2440319919176	1.24073488628257e-66	1.69155e-65
LOC100129550	241.711319536024	-0.656912	0.0381002523106388	-17.2416812534594	1.29223429217116e-66	1.76055e-65
SRA1	789.494742791411	0.716261	0.0415557968321275	17.2361315777159	1.42242458071209e-66	1.93659e-65
ANKRD16	201.447214177937	-0.812434	0.0471374837618055	-17.2354223781818	1.43997729522823e-66	1.95914e-65
UQCRB	3816.66390789263	-0.751166	0.0435904394799988	-17.2323628658233	1.51820847782677e-66	2.06416e-65
NME1	2106.50880747304	0.939333	0.0545162165488731	17.2303366539962	1.57233563744548e-66	2.13629e-65
PON1	15.9955996721657	-2.94346	0.170871309015035	-17.2261536602958	1.69023743213136e-66	2.2949e-65
FBRSL1	653.259889980108	-0.788123	0.0457592840086717	-17.2232365761361	1.77763375471422e-66	2.41191e-65
MGAT3	1150.61298967507	-1.24514	0.0722980453269128	-17.2222916308443	1.8068991525217e-66	2.44994e-65
UQCRHL	443.038490032701	0.881596	0.0511954444796663	17.2202066755662	1.87318089802513e-66	2.53808e-65
RAPGEF3	587.62646074459	-1.33143	0.0773350781924473	-17.2163365962616	2.00270216665393e-66	2.71172e-65
PRIM2	109.955820622404	0.790265	0.0459169476373873	17.2107427075215	2.20584529802305e-66	2.98474e-65
STBD1	212.004934226535	1.1653	0.0677143455303357	17.2091223112393	2.26843741403949e-66	3.06734e-65
IDI2	61.5581069926542	-0.934134	0.0542839472703281	-17.2082896907612	2.30128488802976e-66	3.10964e-65
MLL3	2808.82805374975	-0.854287	0.0496659732325275	-17.2006467686031	2.62584123111114e-66	3.54337e-65
ITGB1	3284.68996803637	1.0359	0.0602252866542023	17.2004875412948	2.63306695473801e-66	3.5507e-65
FAM178A	1118.19732092546	-0.692924	0.040287585348765	-17.1994393186205	2.68113239042987e-66	3.61306e-65
NEK6	1259.75424493597	1.32061	0.076787476223091	17.1981841980976	2.73983667924575e-66	3.68966e-65
DAAM2	8404.34094919743	-2.02703	0.117904196227364	-17.1921522220236	3.04033472685506e-66	4.08654e-65
FAM19A5	1472.04297573394	-1.17963	0.0686142815242285	-17.1921446223437	3.0407333224009e-66	4.08654e-65
OSTM1	738.782200350455	0.700106	0.0407223667365369	17.1921776312454	3.0390024168885e-66	4.08654e-65
SUMF2	3313.53700313724	1.30325	0.0758132020392907	17.1902346865986	3.14257692050271e-66	4.22055e-65
ABAT	9808.55676337739	-1.14588	0.0666907453993293	-17.1820174120843	3.62096731535692e-66	4.85975e-65
BCL2L12	82.5267482269678	1.55039	0.0902417355214006	17.1803836478557	3.72439972716671e-66	4.99518e-65
FRAT1	215.903857938671	-1.28399	0.0747372483049577	-17.1801164390994	3.74159448936926e-66	5.01485e-65
FN3K	958.437125015711	-1.01533	0.0591016426819883	-17.1793677473796	3.79019502201502e-66	5.07656e-65
TCF19	315.099140183626	1.36836	0.0796542643356637	17.1787367194563	3.83164580124392e-66	5.12861e-65
BTAF1	772.18065553187	-0.978278	0.0569658761405538	-17.1730615959351	4.22533261176374e-66	5.64793e-65
MAP4K5	1123.70061102395	-0.836324	0.0487094088801034	-17.1696581821672	4.48050653466945e-66	5.98095e-65
MTERFD1	270.956701319744	0.605208	0.0352602005654036	17.1640495271853	4.93495522480503e-66	6.58315e-65
DSN1	270.588524731838	1.0887	0.0634411352033181	17.1607603055844	5.22254549507751e-66	6.96211e-65
TTC5	209.168729200296	0.738386	0.0430354426378381	17.1576360572401	5.5111613940537e-66	7.34192e-65
NAP1L5	1021.7233947236	-1.03799	0.0605078377751604	-17.1546602071334	5.80083459674858e-66	7.72263e-65
PXDNL	27.2535731048315	2.45827	0.143302708576951	17.154393854465	5.82749002454242e-66	7.75291e-65
RPL4	21359.3287501791	-0.960747	0.0560084292695787	-17.1536198306891	5.90564580656687e-66	7.85162e-65
H2AFY2	615.545160082675	-1.72085	0.10033569260232	-17.1509664630381	6.18157942957678e-66	8.21297e-65
KCNAB1	321.95096601611	-1.85587	0.108210317977587	-17.1505581176745	6.2251708899503e-66	8.26534e-65
ASB9	13.1594490659683	1.68425	0.0982402007091306	17.1442030506179	6.94444308053787e-66	9.20185e-65
APC	3699.02345932939	-0.882668	0.0514920411183448	-17.1418319117503	7.23353352333648e-66	9.57851e-65
STEAP1	48.8184163223358	2.48744	0.145110726364679	17.1417012203891	7.24981173871184e-66	9.59366e-65
SLC25A41	23.0514759638052	-1.72441	0.100607143543936	-17.140013854421	7.46328886223049e-66	9.86299e-65
KIF1C	3728.22766584895	-0.936705	0.054654093654884	-17.1387979549191	7.62099123977082e-66	1.00647e-64
FCN3	7.80583716985287	2.97677	0.173774263196729	17.1300774610646	8.85367599919281e-66	1.16771e-64
LOC153328	231.504184389372	-2.51145	0.146620200905607	-17.128943577164	9.02791430877242e-66	1.1899e-64
MEGF11	1109.60471906812	-1.95847	0.11440482016938	-17.1187702478868	1.07522831706074e-65	1.41623e-64
KIAA1161	752.921293129704	-1.45198	0.0848475570659454	-17.1127516395534	1.19231329920704e-65	1.5694e-64
IL11	16.8746236354699	2.29931	0.134394920704446	17.1085758072756	1.28093341167328e-65	1.68382e-64
PDIA5	133.382260986535	1.62252	0.0948906384961727	17.0987957985546	1.51502387714358e-65	1.99021e-64
FAM190A	14.212775076935	-2.71841	0.15898590864499	-17.0984518713979	1.52398994492259e-65	2.00067e-64
PTCHD2	726.551868335988	-1.68404	0.098529535769345	-17.0917071800666	1.71090895000752e-65	2.24308e-64
TMEM8B	1040.31965504478	-0.747761	0.0437509871552867	-17.0913003715207	1.72288703144911e-65	2.25729e-64
NTRK2	32120.236752955	-1.63358	0.0955916429779009	-17.0891513517514	1.78756350544931e-65	2.34048e-64
ADCY5	426.498377342019	-1.57631	0.0922503460336536	-17.087321489225	1.84453831045224e-65	2.41348e-64
TAGLN	1943.94828242936	1.89367	0.110884885072638	17.0777617947878	2.1729566087593e-65	2.84133e-64
TGIF1	491.692392612821	1.46839	0.0860347090222087	17.0673758357582	2.59609390323757e-65	3.39238e-64
FABP7	3130.79651837206	2.13009	0.124819350682952	17.0653497247032	2.68774952259888e-65	3.50983e-64
ZNF540	242.005282334804	-1.02428	0.0600286209895536	-17.06320746981	2.78816859178959e-65	3.63857e-64
C11orf2	2964.90990989529	-0.821164	0.0481250852815637	-17.0631242611507	2.79214357785197e-65	3.64136e-64
UBE2D4	551.115312243757	0.622895	0.0365060067692256	17.0627983110659	2.8077691064771e-65	3.65933e-64
SNRPB	1811.40077130823	0.909553	0.0533118093937354	17.0610038206407	2.89536776834776e-65	3.77102e-64
RB1CC1	1656.55294821817	-0.713802	0.0418475560684956	-17.0571900333987	3.09068873429701e-65	4.02277e-64
HIST1H2BK	251.412241956524	1.43426	0.0841007088410288	17.0541108571834	3.25792544807814e-65	4.23765e-64
ERRFI1	671.614227513401	1.27817	0.0749665969261853	17.0498684340484	3.5032093077605e-65	4.55371e-64
NT5C2	1530.08073475009	-0.728581	0.0427388176418961	-17.0472988217696	3.6606379900765e-65	4.75523e-64
PLSCR1	622.894229628826	1.61722	0.0948838704633976	17.0442543703117	3.8563065827037e-65	5.00613e-64
KIAA1107	330.615894620269	-1.64489	0.0965240576911869	-17.041197624891	4.06325062450195e-65	5.27132e-64
SERPINB1	337.528644404442	1.40469	0.0824324573076803	17.0405035142062	4.11176342017775e-65	5.33077e-64
FER1L4	20.2443978219183	2.81233	0.165056598338375	17.0385899388681	4.24851704013421e-65	5.50447e-64
C17orf96	334.504397909039	-1.3607	0.0798612841997736	-17.0382357550978	4.27432145656224e-65	5.53428e-64
FAM19A2	237.786825767527	-2.34737	0.137777120544178	-17.0374595026697	4.33142370680768e-65	5.60456e-64
FAM20A	121.832194046977	2.4911	0.146257980869697	17.0322162666753	4.73754786102639e-65	6.12605e-64
GPR123	887.456961824684	-1.55788	0.0914834445787888	-17.0290644469671	4.99971541484526e-65	6.46084e-64
ARAP3	466.73825940546	1.64357	0.0965257051049163	17.0273203099338	5.15095547476933e-65	6.65195e-64
TSPAN31	2737.08629948662	1.99812	0.117359858129495	17.0255932263025	5.30520857831814e-65	6.84669e-64
ADIPOR2	3117.3962914499	-0.918832	0.0539734055674224	-17.0237888138811	5.47128726997779e-65	7.05643e-64
CNIH	1024.42720126415	0.696924	0.0409412607840349	17.0225409995095	5.58915702283161e-65	7.20376e-64
RPRD2	1364.21273112067	-0.608081	0.0357338357274944	-17.0169466962306	6.14948628463661e-65	7.91567e-64
SVOP	546.632485103273	-3.03268	0.178219958999806	-17.01648378842	6.19828559063423e-65	7.9733e-64
KIAA0513	1952.61555010257	-1.62055	0.0952477426744192	-17.0140998543035	6.45577594019674e-65	8.29915e-64
FAM57B	655.459414692288	-1.70916	0.100469909163859	-17.0116756236488	6.72855166310653e-65	8.6442e-64
MYD88	589.968599905181	1.2728	0.0748381466900991	17.00740241396	7.23763690157845e-65	9.29221e-64
WBP2	7628.24536020075	-0.751395	0.0441862705749749	-17.0051591857329	7.52006466140909e-65	9.64856e-64
GSTM2	1771.36204705227	-1.16253	0.0683919096774575	-16.9979970301715	8.49740720511575e-65	1.08955e-63
C10orf32	788.853874251158	-0.782679	0.0460506641652794	-16.9960417022001	8.78556546061727e-65	1.12577e-63
CCDC6	1181.71404711839	-0.657786	0.0387069194040913	-16.9940095375869	9.09537039179009e-65	1.16471e-63
TECPR2	1468.65910575914	-0.793071	0.0466853505478557	-16.9875706315289	1.01507137226423e-64	1.29818e-63
PCGF1	192.996281348864	0.605547	0.0356477580028117	16.9869559321496	1.02576320632555e-64	1.31101e-63
BSN	1480.83441789479	-1.92519	0.11334967317007	-16.9845106667986	1.06941795270681e-64	1.36592e-63
ULBP2	23.1101972278553	1.90565	0.112201119873289	16.9842320381188	1.07450829526978e-64	1.37154e-63
DCTN1	6153.73986638504	-0.682884	0.0402109135951831	-16.9825625254732	1.10551886544179e-64	1.40931e-63
LY96	107.23128400016	1.84301	0.108525230702826	16.9823206722968	1.11008455485327e-64	1.41422e-63
MAP2	13895.584411929	-1.27799	0.0752699857727312	-16.9787982443518	1.17875053574369e-64	1.50073e-63
RPP40	107.884290292621	0.795133	0.046855062954211	16.9700569826311	1.36799255409615e-64	1.74055e-63
NDST1	4175.42578444389	-0.65728	0.0387412061668741	-16.9659166627296	1.46790998651272e-64	1.86648e-63
CLN8	1002.34095642695	-0.785022	0.0462711267503941	-16.9656912596521	1.47355367679919e-64	1.87245e-63
GARNL3	313.917797039668	-1.18957	0.0701214167857754	-16.9644954893225	1.50385725170034e-64	1.90973e-63
FAM84B	2360.24869941781	-1.52895	0.0901284451790095	-16.9641200881284	1.5134982719084e-64	1.92075e-63
WEE1	533.172098613097	1.66142	0.0979417674793749	16.9633251711151	1.53411704274083e-64	1.94567e-63
APBA2	3382.33250296178	-0.812607	0.0479042714566443	-16.9631450751987	1.53882717676873e-64	1.95039e-63
CAMSAP1	1542.97053981866	-0.729648	0.0430273202248123	-16.9577754986806	1.68607859031578e-64	2.13566e-63
POLL	504.807150951348	-0.664337	0.0391788900185294	-16.956506305756	1.72288754864975e-64	2.18089e-63
FCER1G	697.326417695195	1.68348	0.0993165351836885	16.9506569449681	1.90315296906492e-64	2.40754e-63
TMCC1	1197.86759383757	-0.730406	0.0430907092545649	-16.9504226380741	1.91075284658852e-64	2.41562e-63
SUV420H1	1046.77615667683	-0.608056	0.0358772383106612	-16.9482466227031	1.98279376478402e-64	2.50509e-63
PRPF6	3643.39967295065	-0.718237	0.0423858478596308	-16.9451973640909	2.08832118156643e-64	2.63674e-63
PPM1K	861.178731878071	-1.08947	0.0643082942961365	-16.941366579415	2.22886188989067e-64	2.81061e-63
ZNF236	305.423593266119	-0.793078	0.0468139414225992	-16.9410666263498	2.24025622614799e-64	2.82318e-63
C7orf28B	660.633932712178	0.951791	0.0562039830626688	16.9345842038225	2.50119466322296e-64	3.15001e-63
PCDH7	969.881915165178	-1.68412	0.0994582710156951	-16.9329736327094	2.57059141774162e-64	3.23535e-63
SPRN	340.737714111142	-1.47465	0.0871112973518236	-16.9283874204982	2.77889318555075e-64	3.4953e-63
SLC9A6	1559.21840641185	-0.891962	0.052693929989871	-16.9272272233476	2.83420188435914e-64	3.56261e-63
SOCS1	39.9897670879088	1.99823	0.11806357649757	16.9250103020221	2.94295543518301e-64	3.69697e-63
PNMA1	4506.65082422914	-0.74755	0.044169696877052	-16.9244883153367	2.96916108581454e-64	3.72753e-63
GPR98	2271.79016292101	-1.9511	0.115284665633588	-16.9241889083024	2.98429723137106e-64	3.74416e-63
GCLC	1530.75693730781	-0.985073	0.0582123058400042	-16.9220802169303	3.09309962280945e-64	3.87576e-63
NRIP2	128.054168202695	-1.35725	0.0802129788606809	-16.9205180481613	3.17624383011034e-64	3.97743e-63
TMEM111	935.415313836075	0.585008	0.0345850425194446	16.9150470797227	3.4853801916599e-64	4.35903e-63
MSN	5503.28689006135	1.63303	0.0965433998335227	16.9149420159285	3.49160129267936e-64	4.36406e-63
SORBS1	5380.0180696637	-1.08585	0.0641950175115945	-16.9148425044614	3.4975038295442e-64	4.36868e-63
EIF4EBP2	3302.69078715636	-0.606737	0.0358762089332927	-16.9119619617838	3.67274169959201e-64	4.58455e-63
LRRC15	17.9812943702165	4.56731	0.270064528277993	16.9119266278799	3.67494468263588e-64	4.58455e-63
NISCH	3373.92439561271	-0.658457	0.0389438308645886	-16.9078643711257	3.93719678958182e-64	4.90553e-63
AGTR1	9.47330061039795	2.67587	0.158306258503712	16.9030952406457	4.2689743506606e-64	5.31557e-63
TAS2R4	8.55841442089253	-1.75076	0.103582612283461	-16.9020638166531	4.34431427680369e-64	5.40599e-63
DRP2	475.498033579014	-1.38853	0.0821597396507342	-16.9003960610387	4.46894805264588e-64	5.55759e-63
TMEM147	1270.25068678721	0.841982	0.0498213084449151	16.9000315766223	4.49665743673507e-64	5.58854e-63
LOC100128239	145.987120745593	-1.47061	0.0870528099665961	-16.8932548213056	5.04418984411325e-64	6.2651e-63
ADAM12	274.829740359779	2.65531	0.157233024653055	16.8877433138693	5.53810965981828e-64	6.87426e-63
HIRIP3	937.376740136647	-0.714031	0.04228152583297	-16.887536852957	5.55752021770938e-64	6.89404e-63
FCGR2B	124.610578297857	3.19784	0.189365390846748	16.8871191440681	5.59699897247487e-64	6.93867e-63
SYCE1	71.3375846049824	-3.8648	0.228865978355324	-16.886759688367	5.63119571432961e-64	6.9767e-63
RINL	116.555430687923	1.43534	0.0850110889233384	16.8841808432431	5.88271557398165e-64	7.28376e-63
ABHD6	938.83649806313	-0.922064	0.0546150494701361	-16.8829717461864	6.00446578544669e-64	7.42987e-63
ACTR1A	3568.25534853534	-0.590443	0.0349936543946026	-16.8728534195721	7.12689094050002e-64	8.80775e-63
PLBD1	102.518899344593	2.00587	0.118910644000586	16.8686790901009	7.64877071254601e-64	9.44683e-63
GREB1L	50.2967629720215	-2.74708	0.162859762919902	-16.8677710588752	7.7672430206872e-64	9.58718e-63
HEATR5B	826.807578765034	-0.624823	0.0370455291332166	-16.8663590871324	7.95510793939802e-64	9.81295e-63
MCM2	826.929330670147	1.4561	0.0863402810816962	16.8646859794821	8.18358715908287e-64	1.00885e-62
CHST14	552.683889933983	0.797939	0.0473179393557403	16.8633423458179	8.3717987307578e-64	1.03141e-62
MREG	387.386942533774	1.44315	0.0855888971657193	16.8613728408031	8.65550256020197e-64	1.0657e-62
CLEC18B	130.786832467392	2.27859	0.135139144877658	16.8610583657063	8.7016808406391e-64	1.07072e-62
GAPDH	62225.0911089425	0.834475	0.0494917031695856	16.8609019303381	8.72474354481738e-64	1.07289e-62
SMC4	700.055799999633	1.44612	0.0857738327836056	16.8597052012673	8.90320013829305e-64	1.09348e-62
C4orf12	158.987589903499	-1.30615	0.0774740557185499	-16.8592502653778	8.97199049349276e-64	1.10125e-62
LOC151534	38.8527044344039	1.47658	0.0876192024517052	16.8522103609137	1.01065634063665e-63	1.23898e-62
ALDOC	19906.8414737927	-1.61808	0.0960371658892342	-16.8484421026084	1.07714974419944e-63	1.31967e-62
PKIB	175.97111140577	2.36149	0.140161238650871	16.8483503950435	1.07882119354168e-63	1.32091e-62
ENY2	414.790428623421	0.608783	0.0361464489479668	16.8421318266377	1.19840180900665e-63	1.46641e-62
ARHGEF9	2076.13581321068	-0.973515	0.0578028516127402	-16.8419840643547	1.20139835818004e-63	1.46917e-62
ITGA4	146.587910838513	1.99952	0.118733106987782	16.8404241517546	1.23349174691271e-63	1.50749e-62
PDPN	1912.34546872967	2.85314	0.169422915414573	16.840344064611	1.23516231072925e-63	1.5086e-62
SAR1B	582.506575947467	0.747256	0.0443809578726034	16.8373048766878	1.30025184790527e-63	1.58712e-62
KIAA1737	1712.18344861423	-0.684256	0.0406418928347127	-16.8362314200276	1.32404948259094e-63	1.61518e-62
C10orf118	195.188405570169	-1.04086	0.0618344745304094	-16.8330442912455	1.3972932828689e-63	1.70348e-62
RAB18	2356.85589377489	-0.693821	0.0412186793504203	-16.8326821049474	1.40586812654263e-63	1.71288e-62
ANK3	977.898496714899	-1.94469	0.115569789461583	-16.8269395857684	1.54904614392634e-63	1.88616e-62
MTHFS	176.735595930743	0.996076	0.0591961706423776	16.8267040601748	1.55521904015757e-63	1.89252e-62
POP4	477.783640188117	0.685928	0.0407661494795767	16.8259091863605	1.5762334364798e-63	1.91691e-62
CNTNAP2	913.475055765743	-2.21926	0.13190667542053	-16.8244587004716	1.61531244536349e-63	1.96323e-62
RANBP2	2015.2581554534	-0.584539	0.034752751897417	-16.819930882685	1.7436201942467e-63	2.11788e-62
VDR	28.240707509725	2.54111	0.151092113886554	16.8183125519522	1.79190262786858e-63	2.17519e-62
MYL12B	2624.13135825051	0.757675	0.0450554930440033	16.8164877299357	1.84794551926526e-63	2.24185e-62
GTF3A	1596.35992127959	0.730007	0.0434139078851523	16.8150559361476	1.89313798831927e-63	2.29527e-62
RANBP17	70.4454675008318	-2.45399	0.145953275527312	-16.8135605276973	1.94151450372645e-63	2.35248e-62
WWOX	574.140302770544	-0.826891	0.0492018849972773	-16.8060824043734	2.20255055146055e-63	2.66714e-62
SIVA1	767.481019300727	0.892128	0.0530966534697487	16.8019707039382	2.36068571964157e-63	2.85689e-62
KIAA1644	583.169109474032	-2.54815	0.151683193785821	-16.7991462135146	2.47582110513243e-63	2.9944e-62
KLF12	1135.34600780111	-0.997305	0.0593703742783136	-16.7980283401857	2.52291978465431e-63	3.0495e-62
LSM2	779.726153422057	0.86508	0.051515976165795	16.7924654836014	2.77090874643061e-63	3.34721e-62
SALL2	2933.04077932532	-0.965898	0.0575220645841037	-16.791780934291	2.80305768584785e-63	3.38398e-62
HSPC157	152.363443679922	0.848978	0.0505685650196648	16.7886542829114	2.95468760964703e-63	3.56487e-62
CD70	14.4923380887255	5.19989	0.309729115354863	16.7885190684879	2.96142622858136e-63	3.57082e-62
PIK3R1	6062.87181245996	-1.06287	0.0633401636676307	-16.7803483287874	3.39836907754232e-63	4.09519e-62
CHD9	1688.81033011132	-0.866004	0.0516112977740807	-16.7793528311954	3.45581682376184e-63	4.16189e-62
RICH2	319.53526036391	-2.12179	0.126467249501041	-16.7773754827924	3.57281052166284e-63	4.30017e-62
RHOC	5026.38641144604	1.14039	0.0679756486611236	16.7764642090942	3.628048319476e-63	4.364e-62
FSTL1	2864.69053975654	1.69834	0.10123523966236	16.7761920618815	3.64470923153059e-63	4.38139e-62
FAAH	357.19474848853	-1.47216	0.0877557930272414	-16.7756607600838	3.67745567202774e-63	4.41807e-62
PARD3B	127.091368168813	-1.69898	0.101285205156487	-16.7742108424395	3.76831979683509e-63	4.52449e-62
AP1S2	1144.4188758773	0.960335	0.0572910491694132	16.7623941846306	4.59732353605658e-63	5.51651e-62
CBARA1	1487.32808639859	-0.684233	0.0408254370438137	-16.7599714396453	4.78854161040662e-63	5.74248e-62
TSC2	2198.69865784296	-0.611827	0.0365105221908023	-16.7575447709079	4.98801303334986e-63	5.97808e-62
LHFPL4	1622.79548786929	-1.46962	0.0877034660212317	-16.7566970216899	5.05963179669832e-63	6.06025e-62
PELI3	440.963442200207	-1.12624	0.0672135001518928	-16.7561908361221	5.10288252097534e-63	6.10836e-62
[truncated: 4,376 more rows]

## Sheet: DAVID_analysis
Category	Term	Count	%	PValue	Genes	List Total	Pop Hits	Pop Total	Fold Enrichment	Bonferroni	Benjamini	FDR
[truncated: 1,674 more rows]

[truncated: 1 more sheets: DAVID_analysis_UP_DOWN]
