# Supplementary material for: Transmembrane Protein TMEM230, a Target of Glioblastoma Therapy
Source: Front Cell Neurosci. 2021 Nov 17;15:703431. doi: 10.3389/fncel.2021.703431 (PMC8636015; doi:10.3389/fncel.2021.703431)
Supplement: Supplementary Table 7 — All enriched pathways identified different between high or low TMEM230 expression in LGG from DEG. [file Table_7.XLSX]

## Sheet: all_genes
gene_name	baseMean	log2FoldChange	lfcSE	stat	pvalue	padj
A1BG	100.97356541786	-0.441565396481508	0.0903000993904424	-4.88997686007248	1.00847832085411e-06	3.01792273426773e-06
A1CF	0.0137628566022163	-0.000253123867950361	2.69615905583017	-9.38831362352327e-05	0.999925092095188	0.999988810474289
A2BP1	530.905705728218	0.393530886242113	0.174781338703301	2.25156123166072	0.0243500133160857	0.0394737718955075
A2LD1	40.2250224916533	-0.992382675201271	0.088801490983472	-11.1752929394618	5.3872331175521e-29	1.62400741070464e-27
A2M	13118.8704960504	-0.611140760712415	0.0678974028690732	-9.00094458533091	2.23783888307037e-19	2.52880932337774e-18
A2ML1	174.436371883923	-0.470964549841437	0.125453588241401	-3.75409389594498	0.000173969645952397	0.00038906981147159
A4GALT	105.062034514685	-0.552736625646619	0.0761379125732944	-7.25967664420173	3.88016770765968e-13	2.35816922893735e-12
A4GNT	0.461671496781265	-0.336563931698526	0.242800497370315	-1.38617480336214	0.165693533361326	0.227373803012736
AAA1	0.0903522468706285	-0.0774527380546987	0.833552289639521	-0.092918871458195	0.925968013351929	0.998419170303054
AAAS	768.677911189849	0.148511537606488	0.0351238916728511	4.22821989629582	2.35547523046572e-05	5.89692609839981e-05
AACS	496.461163160235	0.154981526946843	0.0651191199325642	2.37996961733111	0.017314065540304	0.0288274871150202
AACSL	1.07468713457056	0.217913598375786	0.228632665630131	0.953116641382793	0.340530975326111	0.431917026372068
AADAC	0.0433614602776978	-0.196936416236285	1.53708438564556	-0.12812336009358	0.898051349719533	0.977286794141689
AADACL2	0	NA	NA	NA	NA	NA
AADACL3	0.00564481224384168	0.0216455025606872	2.89081430390498	0.00748768349853807	0.994025748765192	0.999988810474289
AADACL4	0.00611602646240421	-0.000172041700940721	2.89081430390498	-5.951323151692e-05	0.999952515311437	0.999988810474289
AADAT	272.406607080638	0.29110891426877	0.0399293146108742	7.29060634037255	3.08563142829883e-13	1.89400232822147e-12
AAGAB	658.873787430122	-0.27772098990224	0.0353556821405803	-7.85505958555611	3.99582142545198e-15	2.97270388359872e-14
AAK1	1324.21040675092	0.203651035641035	0.0604153704162965	3.37084808448186	0.000749371692243476	0.00154290517284206
AAMP	2729.40829440267	0.110445229255192	0.0242348418135291	4.55729111437961	5.18175815339024e-06	1.41926964309847e-05
AANAT	2.94560620940801	0.117402571006933	0.121195513119934	0.968703939482909	0.332692926443027	0.423366750082809
AARS	6457.2556889999	0.158704278946291	0.0295762099722381	5.36594374651991	8.05270384867342e-08	2.73636242467006e-07
AARS2	488.527216661314	0.0594982379785216	0.0274486885808036	2.16761678079338	0.0301878559092559	0.0480899849133044
AARSD1	658.804214025876	0.147308352210602	0.0412468646130419	3.57138302735439	0.000355101135735326	0.000761870938087182
AASDH	320.422610934483	0.0160955994633216	0.0377719939515747	0.426125226112151	0.670016599478842	0.773751538940592
AASDHPPT	1661.54322050187	0.127904061718671	0.0353179179229814	3.62150628464549	0.000292892688898421	0.00063546705400258
AASS	1220.78802184298	-0.103915025628123	0.057433842547041	-1.80929955266377	0.0704044784643757	0.104439499515541
AATF	1294.39295841219	0.0415046336273334	0.0371489430241544	1.11724938177506	0.263887711723266	0.344745792757664
AATK	1770.17442450355	-0.00405757266704732	0.0930954604170964	-0.0435850754576877	0.96523514845191	0.999988810474289
ABAT	11178.4708501868	0.49526030884182	0.0580768851966587	8.5276665090557	1.49329296919037e-17	1.41870039085485e-16
ABCA1	2479.91718985741	-0.0879141289105651	0.0719368608367975	-1.22210126891713	0.221669333328574	0.295494062881627
ABCA10	5.83218719918959	-0.540823504029124	0.123447804627082	-4.38098924207582	1.18141704891641e-05	3.08437594269489e-05
ABCA11P	126.843079640017	0.0861754401324131	0.0452551488762946	1.90421294089595	0.0568824570190528	0.0861132943490005
ABCA12	6.63414311408213	-0.478342158917617	0.139739999576961	-3.42308687824327	0.000619142854093865	0.00128944425336836
ABCA13	17.8171498527966	-2.3816581861308	0.176447057618137	-13.4978628619874	1.60978369454434e-41	1.89752048066499e-39
ABCA17P	61.666949577171	0.360712791652309	0.0823915309845154	4.37803239413164	1.19755553806643e-05	3.12360948281935e-05
ABCA2	7900.33407854228	-0.187827500445878	0.0812251724752007	-2.31242969047834	0.0207540157594259	0.03407362804206
ABCA3	4762.38470863338	0.298165775657232	0.0377939935614703	7.88923708663595	3.04039433082286e-15	2.28348578413766e-14
ABCA4	6.98366083504588	-0.424913565434777	0.122926372834666	-3.45665096623553	0.000546932755152018	0.00114584624150356
ABCA5	162.917384085213	-0.605986541504974	0.130224295114248	-4.65340619408483	3.26496172564097e-06	9.18022733455828e-06
ABCA6	44.7500083546446	-0.678862726785435	0.158393610127047	-4.28592243235646	1.81982482215093e-05	4.63431456973365e-05
ABCA7	181.674675230678	-0.505152084045849	0.0862764408398852	-5.85504083302796	4.76892831616391e-09	1.85856966746558e-08
ABCA8	609.880804879463	-0.460623153192347	0.102165332154495	-4.50860525266818	6.52551940515633e-06	1.76037891586271e-05
ABCA9	62.0130777000197	-0.245919106762424	0.0968061253385557	-2.54032589262696	0.0110749219419439	0.0189970232160304
ABCB1	651.189833517775	0.0517617138028261	0.0628217561245546	0.823945667806546	0.409970430280418	0.508331312677629
ABCB10	287.938900356134	0.0652341889228378	0.0288682640642601	2.25971983551307	0.0238386444335871	0.0387085470325135
ABCB11	0.850067466068097	-2.28441326605408	0.432514478741219	-5.28170356909805	1.27988164514761e-07	4.25223125480687e-07
ABCB4	48.0752109973655	-0.451882281160728	0.090377395460055	-4.99994803856071	5.73457668002306e-07	1.76410598447029e-06
ABCB5	0.162362492376566	-0.438249812603041	0.794039731918785	-0.551924286639936	0.58100022802112	0.68769543088872
ABCB6	917.037496848464	0.324685314405917	0.0379495054717963	8.55571924770456	1.1713606792845e-17	1.12150948306008e-16
ABCB7	391.607444777161	-0.0948039524337066	0.0327704617389327	-2.89296968681633	0.00381618125954975	0.00705300235604515
ABCB8	849.919671343674	-0.0914904739877526	0.0382349096824191	-2.39285184005079	0.0167179904890825	0.0278940195607382
ABCB9	232.166036539866	-0.149348684131268	0.0736078987491635	-2.02897632820914	0.042460701445482	0.0657571322440652
ABCC1	464.634662555487	-0.48643369859613	0.0563234765277912	-8.63642886738557	5.79974847108499e-18	5.71411654921461e-17
ABCC10	404.948280566729	-0.0459093020933961	0.0347313702944066	-1.32183964249719	0.186221554527221	0.252324566414395
ABCC11	16.2563612847631	-0.0335333778981456	0.0861401023961944	-0.389288809338902	0.697062513574708	0.799258829200729
ABCC12	8.79517870798584	0.29833979325405	0.261099499408211	1.14262874471321	0.253192765737218	0.332096188268732
ABCC13	0.49253097138308	-0.565317319431304	0.3344479449654	-1.69029987458822	0.09097059909402	0.132032459128938
ABCC2	6.52677836238425	0.205516939759954	0.0998909975477194	2.05741202716266	0.0396466092116162	0.0617048942386673
ABCC3	200.42768799206	-3.63780746635637	0.197725940836501	-18.3982306568689	1.35724610422167e-75	3.81676993737195e-72
ABCC4	428.406788811038	-0.114133230335534	0.0595533894703731	-1.91648588519573	0.0553032781254835	0.0838386622949668
ABCC5	1266.79585197141	0.289807447891699	0.0531458820225849	5.45305556822901	4.95115888110175e-08	1.72685263243246e-07
ABCC6	47.5551278502715	-0.12260686752393	0.0846870695265261	-1.44776372838744	0.147683140083025	0.204742771500412
ABCC6P1	9.89589097143662	0.0135040195075707	0.109367404668992	0.123473895613063	0.901731844377164	0.980208258687087
ABCC6P2	23.5773922876146	-0.163204528041284	0.0809135929282188	-2.01702238319918	0.043693177519032	0.0675182749665401
ABCC8	757.788421595792	1.37182724064565	0.124044383596386	11.0591644770414	1.97932686361342e-28	5.6610778680184e-27
ABCC9	413.287936736719	-0.0233387996573004	0.097709430510388	-0.238859233293957	0.811214737743944	0.901527810788096
ABCD1	286.024440534735	-0.283948073257622	0.0531449501239549	-5.34289848038889	9.14719982007301e-08	3.09014292874785e-07
ABCD2	171.527447666391	-0.393844008827932	0.118746683398844	-3.31667375925858	0.000910959213699472	0.00185040059041111
ABCD3	1505.1684832615	-0.227175242805509	0.0406471117735468	-5.58896396061663	2.28428350485212e-08	8.27191331733149e-08
ABCD4	837.153328246212	-0.0606063840929376	0.0425139889501614	-1.42556334019811	0.15399442454679	0.212681266059441
ABCE1	1241.81050529872	-0.040025345162491	0.0307769532679096	-1.30049731739446	0.193430575101761	0.261157810073948
ABCF1	1825.62572056044	0.0653986473362586	0.0288602740781633	2.26604387606081	0.0234486969871401	0.0381130872918712
ABCF2	1571.02804419332	-0.126188945312671	0.0265114853363888	-4.75978406006051	1.93800193166582e-06	5.60325490645416e-06
ABCF3	1219.21850140775	0.0417516884119766	0.0254918801971682	1.63784264201173	0.101454523657247	0.145850602365654
ABCG1	935.151692281873	0.39748049875829	0.0623364499892247	6.37637367586697	1.81330183996743e-10	8.23790600502166e-10
ABCG2	1194.13797151935	0.0257540980304222	0.0652338024559691	0.394796824051541	0.692992838978393	0.795612039851258
ABCG4	72.4849607418271	0.468456177812313	0.14360644833007	3.26208316729341	0.00110596691133775	0.00221926183992698
ABCG5	2.01121984172042	-0.0347652903031933	0.114197411050808	-0.304431510165547	0.760799164657367	0.857554486731578
ABCG8	0.798761980697467	0.790478025119732	0.327304056763124	2.41511832434089	0.0157300987522153	0.0263619099214506
ABHD1	25.2760605469624	-0.126667499908771	0.0809015641949283	-1.56569902163538	0.117419095443317	0.166527009639891
ABHD10	864.62986131622	0.02728562676376	0.0289712664942366	0.941816843567679	0.346286420089206	0.438510658054424
ABHD11	307.782894590089	-0.219503027759875	0.0495593591244091	-4.42909334660392	9.46300611415488e-06	2.5007286260859e-05
ABHD12	2171.85610928565	-0.104651051837677	0.0369304187889194	-2.83373585433253	0.00460073435740847	0.00839891086205933
ABHD12B	13.9541570327358	-0.339264800533171	0.155583459144827	-2.18059684749239	0.0292132485141577	0.0466317545411284
ABHD13	344.415243175186	0.00564069325633991	0.0331923262113216	0.169939678841067	0.865057575746482	0.949041875860754
ABHD14A	630.607533863036	0.233182422382505	0.0519556588081994	4.48810442849596	7.18597042941471e-06	1.92824192888534e-05
ABHD14B	532.747999753589	-0.288459211788593	0.0509018877970711	-5.66696490587115	1.45349097673547e-08	5.37414911289213e-08
ABHD15	173.518933398738	-0.607039393742059	0.0537271202269796	-11.2985656252841	1.33378704961652e-29	4.255364355219e-28
ABHD2	5003.61976768606	0.229641093862607	0.0717250414911723	3.20168645550202	0.00136625622143709	0.00270707133558018
ABHD3	345.508385148467	-0.0951048290823586	0.0551341483167111	-1.72497140131813	0.0845326265588373	0.12340735344191
ABHD4	1953.94011380786	0.141868058685909	0.0488360969967693	2.90498355540768	0.0036727239600775	0.0068063990918966
ABHD5	739.276262186992	0.0175055611662433	0.0363806298499047	0.481178067517409	0.63038994737827	0.736059440900483
ABHD6	1048.56106643549	0.21805442580218	0.0501944737607301	4.34419188936245	1.39789287175691e-05	3.61342318241465e-05
ABHD8	650.924181083439	0.0201922821623429	0.0744451398349275	0.271237077492456	0.786208697729558	0.879521745121164
ABI1	2291.28080070256	0.235421251804271	0.0427404425434905	5.50816130564671	3.62601076993621e-08	1.27894681967737e-07
ABI2	4793.49885901718	0.228272323595901	0.0340878999036576	6.69657926246749	2.1335474940655e-11	1.07386556943696e-10
ABI3	297.909408629042	-1.00249849145512	0.0890947058986028	-11.2520545563734	2.2625931996564e-29	7.04733340747409e-28
ABI3BP	669.579460421882	-0.36608513527227	0.121305920002746	-3.01786701971332	0.00254560582517275	0.00484203794265393
ABL1	3223.8063575682	0.190608418070979	0.0349730728132044	5.45014786344461	5.03279590724496e-08	1.75284124971899e-07
ABL2	1135.00641227721	0.318257057862766	0.0326406440169118	9.75033022319872	1.83869184617968e-22	2.83879599937623e-21
ABLIM1	6063.84550257196	0.131301479455839	0.0532189456650216	2.46719430111029	0.0136176442369881	0.0230473155193113
ABLIM2	342.839444310155	0.303307754803065	0.105055340693335	2.88712361314829	0.00388781454487327	0.00717798061487811
ABLIM3	1398.66152457767	0.285487946946363	0.0833205788217681	3.42637978496349	0.000611684459019213	0.00127499031933431
ABO	3.37141451200623	0.34518906596635	0.131872769001134	2.61759170282821	0.00885526909551917	0.0154494347376846
ABP1	0.873617710143417	-1.41251737336442	0.302319531121778	-4.67226635382497	2.97894299851649e-06	8.41810119520485e-06
ABR	6956.69151889016	0.00542574045887465	0.0530049226575789	0.102362953983084	0.918468587608117	0.992864038828434
ABRA	0.501496132563795	0.62344386779857	0.33260650773524	1.87441872993911	0.0608727339244941	0.0915346243452499
ABT1	401.843846114358	-0.0806864932589465	0.0252205410511971	-3.19923720490987	0.0013779174596713	0.00272907789451952
ABTB1	445.158568860354	-0.121771809655334	0.0773238619396361	-1.57482834665445	0.115296071458337	0.163728406193721
ABTB2	395.877209228171	0.589289413070281	0.0915768487019225	6.43491691866779	1.23540885720462e-10	5.72481717374599e-10
ACAA1	1544.05726150782	-0.179254521505154	0.0403753713806992	-4.43969963309969	9.00845177646582e-06	2.38830132282464e-05
ACAA2	564.646616333943	-0.853384447954805	0.0728731680306548	-11.7105441003446	1.12554990883258e-31	4.60633055205183e-30
ACACA	2624.1506370517	0.351104330852473	0.0404331615319189	8.6835735210887	3.83524829342964e-18	3.85713007059254e-17
ACACB	378.716302378847	-0.52122994720843	0.0886347847571833	-5.88064774610047	4.08664039582511e-09	1.6053784911558e-08
ACAD10	494.990934010781	0.0259129816557556	0.0338424930466416	0.765693639060291	0.443858612801939	0.545647776387466
ACAD11	671.137909664417	0.0236978413674564	0.0473187929596911	0.500812465517529	0.616503111822532	0.722760035508698
ACAD8	946.770367706542	0.0988661500110209	0.0268785065878087	3.67826053460365	0.000234830022369391	0.000516321790499437
ACAD9	777.693270581632	-0.0544617966223244	0.0225802192748245	-2.41192505526489	0.0158685429975179	0.0265848739494587
ACADL	19.7938003970596	-1.02494874345045	0.154798989367083	-6.62115914090332	3.56393025525811e-11	1.75653397783565e-10
ACADM	1014.11584069709	-0.35405379905441	0.0420279510491113	-8.42424601286616	3.63080684979941e-17	3.32739445243489e-16
ACADS	231.174607339761	-0.549977140331137	0.0796201481592203	-6.90751214417889	4.9322674698595e-12	2.65060565504189e-11
ACADSB	764.878645475677	0.329234316096229	0.0478716704615924	6.8774352956907	6.09396863353956e-12	3.24566484175396e-11
ACADVL	3714.92643255892	-0.185234791189196	0.0433040274043706	-4.27754188910615	1.88968406678846e-05	4.79670288262164e-05
ACAN	206.659390547205	0.686067059351552	0.173977121945131	3.94343262884832	8.03235635740748e-05	0.000188413888102438
ACAP1	18.1771598860803	-1.49801683537329	0.116668928876761	-12.8398953328496	9.80068862035848e-38	7.93936442352909e-36
ACAP2	1129.27862594312	0.157550611462259	0.0401146679632163	3.92750630783551	8.58311705296227e-05	0.000200496806915346
ACAP3	3235.59819657406	0.469250428552649	0.068476718233476	6.85270031418136	7.24688030600565e-12	3.82350144260845e-11
ACAT1	1674.7639848703	0.0589856670221275	0.0373000906293198	1.58138133250973	0.113790873123841	0.161789334593196
ACAT2	912.097842493851	0.341373814717469	0.0720623804531334	4.73719869605868	2.16692684051652e-06	6.2198825977789e-06
ACBD3	912.89138007227	0.0476103811016667	0.0299234782263759	1.59107108944644	0.111593577979647	0.158929213032076
ACBD4	337.809861496876	0.119821743685029	0.0526242169844852	2.27693162105111	0.0227903092526928	0.0371441660572327
ACBD5	2190.22748867328	0.261004059663365	0.0409771895002399	6.36949636728592	1.8964991179649e-10	8.59801592287866e-10
ACBD6	512.901361203422	0.180518791912278	0.0326165507757308	5.53457639201376	3.11981435284784e-08	1.11055236050289e-07
ACBD7	1092.05781287873	0.269335127264445	0.120906371382696	2.22763386399165	0.0259049405436787	0.0417811351579119
ACCN1	105.857299509136	0.38095846954819	0.159380317124559	2.39024790777938	0.0168370034704812	0.0280759350543347
ACCN2	3359.10009141876	0.922485925915092	0.0699150726144525	13.1943784282704	9.45313648340685e-40	9.39823190282141e-38
ACCN3	163.614962984092	0.510219206881423	0.0876132036847822	5.82354240483097	5.76131875055955e-09	2.22070804003847e-08
ACCN4	2257.68451344025	1.06636348186842	0.121871235371224	8.74991936054671	2.13505259934818e-18	2.20275211835266e-17
ACCN5	0.00190095586563166	-0.000130844374231799	2.89081430390498	-4.52621166482576e-05	0.999963886055949	0.999988810474289
ACCS	82.2518207498497	-0.718005136450869	0.109857335548827	-6.5357960200277	6.32721017800894e-11	3.03333447141569e-10
ACCSL	0.0658418633828609	0.173719322094078	0.902398060956141	0.192508527677922	0.847343888719834	0.933197071134046
ACD	582.991435274067	0.181152503017915	0.0395095886307045	4.58502630111248	4.53929292017913e-06	1.25323956709293e-05
ACE	224.435499157823	-0.548401672678364	0.113692059037896	-4.82357059340062	1.41010827051416e-06	4.14855497011974e-06
ACE2	3.4823793310493	-0.213948772681007	0.125870663597352	-1.6997508916407	0.0891777922622817	0.129669437190354
ACER1	0.0519076664794833	-0.055222772766732	0.930105871286227	-0.0593725665771418	0.952655363201884	0.999988810474289
ACER2	25.5508081952439	0.236284406841703	0.0757111452609802	3.12086689518722	0.00180319517887171	0.00351235870731146
ACER3	613.054158284218	0.0548496605177315	0.04198643599528	1.30636619226022	0.191428057037419	0.258738073522494
ACHE	395.079620646468	0.0506202324949284	0.0871101050968541	0.581106318706031	0.56116880029902	0.667226856359399
ACIN1	2945.98819521006	0.160630990491354	0.0292873055969811	5.48466262829966	4.14259235540034e-08	1.45463664852044e-07
ACLY	3794.28370977036	0.0884733446366139	0.0382182059383783	2.31495284679938	0.0206155127486395	0.0338688339556808
ACMSD	0.379919619393508	-1.86983005871853	0.551454924082458	-3.39072148431652	0.000697089029582179	0.00144110455233409
ACN9	176.949550319672	-0.459249774166603	0.0688966741055958	-6.66577567246171	2.63271131015464e-11	1.3103646558886e-10
ACO1	1041.74436910024	0.100253057561316	0.031525328207441	3.1800797410145	0.00147234530672457	0.00290005176734772
ACO2	6255.66478442821	0.0902064645239625	0.0436899233391385	2.06469724892269	0.0389516550573881	0.0607096856535775
ACOT1	380.11208696253	-0.0868966103764957	0.0682650349440204	-1.27292999187291	0.203042885454289	0.272827689751877
ACOT11	81.8965572508291	-0.738024619990355	0.119694855808601	-6.16588419781798	7.0090366799347e-10	2.98771951157459e-09
ACOT12	0.781555642768626	-2.63781073447131	0.501841248415478	-5.25626528867441	1.47010186252768e-07	4.8433397763778e-07
ACOT13	649.021467088202	-0.204667148275878	0.030461984367393	-6.7187726776906	1.83261543644655e-11	9.31689950063284e-11
ACOT2	225.187837979641	0.117658463633632	0.0646854912205929	1.81893128448834	0.0689219142392475	0.102448680948394
ACOT4	20.8882898888446	-0.265672939555658	0.111714172500412	-2.37814892783348	0.0173997968700077	0.0289604296428598
ACOT6	3.27353564822153	-0.475082862165493	0.141348716538841	-3.3610695151586	0.00077641281973483	0.0015938769795057
ACOT7	1075.43757774249	0.160567081469599	0.0744274261573567	2.1573644254488	0.0309772807983567	0.0492200962560055
ACOT8	525.481331888539	-0.040345198975846	0.0345341533266526	-1.16826952710344	0.24269806310752	0.320101264473804
ACOT9	283.266835006636	-0.350297222847115	0.0615639241976844	-5.68997554025789	1.27057570607493e-08	4.72267423981967e-08
ACOX1	2100.14997653146	0.0576406004256248	0.0297362106854198	1.9383976336261	0.0525747289155923	0.0800846195700251
ACOX2	134.507423167581	-0.344342489655727	0.0869309452046803	-3.96110371105442	7.46041182434309e-05	0.000175878091930771
ACOX3	424.603174695195	0.10253323317213	0.0297046275358038	3.45175959700366	0.000556943710527955	0.0011659509668981
ACOXL	1.30816767790496	0.525489459212992	0.135761567826673	3.87067907085372	0.000108532597749738	0.000249937317115535
ACP1	1165.35625596891	-0.102489663790841	0.0249146533570834	-4.11362993182897	3.8948565115966e-05	9.46663173611299e-05
ACP2	1056.33691098066	-0.0940228364063831	0.0300971656724582	-3.12397643783524	0.00178424744051447	0.00347923832258815
ACP5	64.5142254164812	-0.588346585833553	0.147978871060905	-3.97588237844714	7.01187779444421e-05	0.000165740651277179
ACP6	176.791279999037	-0.213879249819985	0.0568959323638085	-3.75913076619223	0.000170504708467953	0.000381586309318438
ACPL2	1043.26611637415	-0.326461630017178	0.0620895499711884	-5.25791586778559	1.45697142709414e-07	4.80329635611257e-07
ACPP	10.7520925849767	-1.2680314797861	0.171556078407209	-7.39135267930452	1.45342539100631e-13	9.24416117026145e-13
ACPT	0.0898467615574224	-0.0774114985528532	0.833606886418985	-0.092863314607918	0.926012150469443	0.998419170303054
ACR	3.53723723332185	0.186038865402594	0.098356899259811	1.89146736835583	0.0585619829863632	0.0884314693990917
ACRBP	22.005490394765	-0.393828264214796	0.0769343340593214	-5.11901830346811	3.07130156563219e-07	9.76082843388275e-07
ACRC	46.00824588898	0.187227894557159	0.0661340950503656	2.83103434642255	0.00463977383912086	0.00846546927640134
ACRV1	8.48050000538979	0.106488407825906	0.147893657260832	0.720033636318144	0.471504285843406	0.57442516814132
ACSBG1	1224.88089731977	0.0704414940237217	0.0937480327468695	0.751391703481629	0.45241695428733	0.554741979889504
ACSBG2	2.50392985601785	-0.0023262410828045	0.151265105451563	-0.0153785704631621	0.987730159699214	0.999988810474289
ACSF2	309.987570533993	-0.504452446081049	0.074051770850974	-6.8121591190066	9.61446759704935e-12	5.03353177255097e-11
ACSF3	397.146356733914	0.0161283411680539	0.0328348593355672	0.491195683320118	0.623288051745328	0.729142853890187
ACSL1	959.758681794044	-0.732679877368265	0.0707081168080667	-10.3620335322617	3.69031591116109e-25	7.38250698284614e-24
ACSL3	2738.26450103519	-0.0101209868532205	0.0548525420592051	-0.184512631015285	0.853611319155367	0.93920623875543
ACSL4	1050.95756659885	0.18289937795003	0.0480995252459837	3.80251940148416	0.000143232045717696	0.000323934147512966
ACSL5	206.531079539484	-0.253755377744066	0.0573759356664139	-4.42267955714762	9.74842728985681e-06	2.57201167673008e-05
ACSL6	851.281944711685	0.870102927213145	0.0925550700392917	9.40092127685461	5.40873849430257e-21	7.19398765272609e-20
ACSM1	0.723498454647217	-0.018865719260638	0.206675446062021	-0.0912818606182015	0.927268630938385	0.999303788460644
ACSM2A	0.190684644384739	-0.165837122498485	0.74984150618142	-0.221162900601506	0.824965595020223	0.913714496031795
ACSM2B	0.0323153236744825	-0.109548144296044	2.89081430390498	-0.0378952546858731	0.9697711965454	0.999988810474289
ACSM3	1.46465807255113	-0.89580196692164	0.152795598492235	-5.86274719796437	4.55271099688781e-09	1.77923597327251e-08
ACSM4	0.00365265246405694	0.0107573290932275	2.89081430390498	0.00372121069094484	0.997030910294569	0.999988810474289
ACSM5	247.130713871761	-0.159052813019018	0.113859086291816	-1.39692683473125	0.16243557405981	0.223292198000513
ACSS1	1794.9645407048	0.129447619305012	0.0698079821252913	1.85433836309263	0.0636907669276882	0.0953351643959807
ACSS2	671.109271118605	-0.0475608182917537	0.0340043685370839	-1.39866788703591	0.161912598350023	0.222619927255725
ACSS3	236.660286239871	-1.11627543440186	0.119215000253943	-9.3635484798394	7.71027498946475e-21	1.00381457121438e-19
ACTA1	7.9508551517723	0.0929589299474216	0.108004223526696	0.86069717379566	0.389404850082233	0.485799763855045
ACTA2	776.049384482518	-0.592627675556997	0.107816153583548	-5.49665013877314	3.8707355554706e-08	1.36306671573236e-07
ACTB	78256.844296286	-0.374067743187032	0.0343034705799443	-10.9046617401369	1.0949976507198e-27	2.85119427968509e-26
ACTBL2	0.00389168870054556	-0.0110602151684004	2.89081430390498	-0.00382598603911015	0.996947312257175	0.999988810474289
ACTC1	52.003214424639	0.0034974676805234	0.194496789274582	0.0179821358160614	0.985653104661609	0.999988810474289
ACTG1	45452.8973529014	-0.19612505478221	0.0344211322129608	-5.69780951912913	1.21356527774182e-08	4.51930240112518e-08
ACTG2	34.4852327396106	-1.06456203302036	0.199100454087767	-5.34685889039248	8.94937322132196e-08	3.02694865741792e-07
ACTL6A	521.93879848045	-0.367310113761997	0.0431680881160291	-8.50883441431839	1.75690529293213e-17	1.66432534607165e-16
ACTL6B	530.348728529465	0.891141436690185	0.130966948249199	6.8043231410917	1.01525425295352e-11	5.30113527039525e-11
ACTL7A	0	NA	NA	NA	NA	NA
ACTL7B	0.0184977227461292	-0.0548561250783216	2.20145796310358	-0.0249180888291805	0.980120298914449	0.999988810474289
ACTL8	0.934200431579946	-0.248954846582403	0.25083296669021	-0.992512467030992	0.320947600931728	0.410143698022661
ACTL9	0.00183975885254172	-0.000130844374231719	2.89081430390498	-4.52621166482298e-05	0.999963886055949	0.999988810474289
ACTN1	1910.45886337813	-1.16259560180701	0.100367594791484	-11.5833761307355	5.00358822442241e-31	1.87610731805248e-29
ACTN2	715.629905280873	-0.0240832563470006	0.0759117928817725	-0.317253162292039	0.751051514030283	0.848840838457022
ACTN3	0.612036246889622	-0.474126192941934	0.204659672239975	-2.31665666104456	0.0205224421773602	0.0337300053653949
ACTN4	4121.17338881634	-0.455527635645806	0.0435269132120152	-10.4654247689694	1.24516803711277e-25	2.6299498723782e-24
ACTR10	1034.31103343225	-0.00921594275676445	0.0319080979849675	-0.288827706405636	0.77271322862289	0.868001592412782
ACTR1A	3844.60310539161	0.0950842114247341	0.0329479966602359	2.8858874912868	0.00390311658543048	0.00720352990663782
ACTR1B	1517.91042786956	0.0846269502600125	0.0342552972228789	2.47047776901175	0.0134932705445902	0.0228545027250265
ACTR2	4556.89794956175	-0.104768636546411	0.0293599305462412	-3.56842249273726	0.000359137059538943	0.000770026469559318
ACTR3	2256.86656897095	-0.280271377050252	0.0316493787420549	-8.85550959260486	8.33023547993422e-19	8.91199377296224e-18
ACTR3B	427.250743522812	0.250644622640702	0.0640467055261584	3.91346628341925	9.09806090914316e-05	0.000211621563271279
ACTR3C	7.7055908217742	-0.0953083173878741	0.114113127185543	-0.83520905734979	0.403600010917416	0.501506515270126
ACTR5	204.092480084011	0.0959410350370936	0.0321133126772754	2.98757826703394	0.00281197284421111	0.00530309306747421
ACTR6	725.230605951504	0.10994706416669	0.0261051220740156	4.21170465531469	2.53450784031882e-05	6.32181789618297e-05
ACTR8	564.848198815762	0.227137695963277	0.0292338715314363	7.76967551899609	7.86874376711356e-15	5.66762609058289e-14
ACTRT1	0.0132114693872636	-0.0220719806159872	2.89081430390498	-0.00763521219130948	0.993908041264101	0.999988810474289
ACTRT2	0.0038624445402824	0.0107573290932275	2.89081430390498	0.00372121069094484	0.997030910294569	0.999988810474289
ACVR1	638.203511698509	-0.173780411106633	0.0381941108936927	-4.54992686150815	5.36645651089925e-06	1.46679667338311e-05
ACVR1B	1160.48375739706	0.211592821430536	0.0403870299667257	5.2391280469216	1.61337069827277e-07	5.29408271303542e-07
ACVR1C	107.058485697099	0.371951756649306	0.132656761140324	2.80386580715518	0.005049391619615	0.00917033619633926
ACVR2A	350.244932451443	0.23078195609319	0.0371606621075058	6.2103833194774	5.28555102825253e-10	2.2817121050691e-09
ACVR2B	681.037129654968	0.54687267042138	0.0519944310446057	10.5179085420172	7.1441791186817e-26	1.55224244979304e-24
ACVRL1	311.014233495939	-0.271599233879032	0.0680754957937891	-3.98967691255231	6.61633557492019e-05	0.000156918753966631
ACY1	428.958754379294	0.0662062763803793	0.0498939734243372	1.32693934430336	0.184528748085666	0.250341034187893
ACY3	148.082163805219	-0.231087856839171	0.158389701559852	-1.45898284145606	0.144569830372528	0.200921851940357
ACYP1	87.0815126571399	-0.0761752720668561	0.0674763046981864	-1.12891884651329	0.258932069626067	0.33883386230068
ACYP2	509.003151998169	-0.201548320482218	0.0463499511831485	-4.34840415874042	1.3713172152257e-05	3.54955678918053e-05
ADA	130.247130644256	0.279547489549918	0.0838916491247418	3.3322445376446	0.000861485221001261	0.00175643051014084
ADAD1	0.0094767467853355	-0.043848327550907	2.89081430390498	-0.0151681578064961	0.987898025128455	0.999988810474289
ADAD2	30.1162354484465	-0.0472577660310895	0.166117045413717	-0.284484749372908	0.776038919681213	0.870644371020442
ADAL	247.635811717375	0.0210773190253489	0.0324307443517686	0.649917830954734	0.515745299689987	0.620489318200549
ADAM10	1061.72131393414	0.0264848916495509	0.0507811424063677	0.521549740602721	0.6019838646416	0.708438594814964
ADAM11	354.812254065818	0.595468302304667	0.134654209037293	4.42220340947344	9.76994115915903e-06	2.57669899108599e-05
ADAM12	112.716987483876	-2.08706287797784	0.142222156706885	-14.6746676207366	9.36734420364076e-49	2.33412874238821e-46
ADAM15	1218.24490387362	-0.267410307046383	0.0412816958401883	-6.47769675164498	9.31332898896919e-11	4.37131333209009e-10
ADAM17	763.439609535434	-0.0881864684947721	0.0472253730884542	-1.86735355863885	0.0618522306615373	0.0928514573760667
ADAM18	0.00178454740727312	-0.000130844374231799	2.89081430390498	-4.52621166482576e-05	0.999963886055949	0.999988810474289
ADAM19	231.292729842745	-0.693350890623638	0.0966523619957839	-7.17365697336898	7.30204380868002e-13	4.31394755023608e-12
ADAM2	0	NA	NA	NA	NA	NA
ADAM20	2.07270507335483	0.470262106582677	0.0880489967080543	5.34091385665567	9.24791962921566e-08	3.12363242795316e-07
ADAM21	7.88336650268147	0.173226071227804	0.0698718165949446	2.47919804678926	0.0131678169381029	0.0223436321374498
ADAM21P1	1.56913491580383	0.24879479351581	0.100388840959384	2.4783112459329	0.0132005936074173	0.0223934578733203
ADAM22	633.613346692181	0.742892156604911	0.0849404620402648	8.74603385431026	2.20982835795176e-18	2.27275189270012e-17
ADAM23	514.350991041425	0.202923055881246	0.0856810783183563	2.36835319844209	0.0178674695535038	0.0296660879015455
ADAM28	221.360842775015	-0.640568430405736	0.0977249432552952	-6.55480994992572	5.57127839254499e-11	2.68668826940833e-10
ADAM29	5.97220387068196	1.23811800971872	0.153594868611154	8.06093342124068	7.5714060745824e-16	6.1133358727709e-15
ADAM30	0.0171499227652849	0.0433394548421887	2.89081430390498	0.0149921268839872	0.988038461514291	0.999988810474289
ADAM32	6.02134371419373	-0.645361727741624	0.130305463323715	-4.95268357350733	7.31969486834897e-07	2.22426973577415e-06
ADAM33	78.6705856697107	-1.39990997681791	0.134980020034415	-10.3712384726346	3.35152567170956e-25	6.74588781672829e-24
ADAM3A	0	NA	NA	NA	NA	NA
ADAM5P	0.0109210969095352	-0.0547776983450747	2.89081430390498	-0.0189488817289577	0.98488188454812	0.999988810474289
ADAM6	166.70281265033	-2.73796031356283	0.193620436195181	-14.1408642980373	2.12656421992239e-45	3.45962121232829e-43
ADAM7	0.00596676144267176	-0.000172041700941363	2.89081430390498	-5.95132315171421e-05	0.999952515311437	0.999988810474289
ADAM8	79.897576829359	0.297682701437143	0.0978188134363512	3.0432049927782	0.00234072821460476	0.0044778653940228
ADAM9	2109.46293557261	-0.419752000983499	0.0571936313640599	-7.3391388336861	2.1497253125844e-13	1.34000452115972e-12
ADAMDEC1	15.9086291206059	-0.786384163468837	0.304012763368515	-2.58668141019989	0.0096905144732727	0.0167994519952772
ADAMTS1	419.911633400369	-0.479744239031364	0.102178985197857	-4.69513607032206	2.66429312266525e-06	7.55932691260671e-06
ADAMTS10	373.410545413817	0.299780504691243	0.0569231421916489	5.26640823308632	1.39118738161782e-07	4.59797239878221e-07
ADAMTS12	34.4797342215087	0.00201211217663536	0.114920817703861	0.0175086830814272	0.986030805811672	0.999988810474289
ADAMTS13	298.120727001868	0.550523792529086	0.0649205013549801	8.47996828488532	2.25255334126347e-17	2.11049559841844e-16
ADAMTS14	84.3932940407844	-1.22430591851604	0.141036902557533	-8.68074877081629	3.93171750722379e-18	3.94474307490827e-17
ADAMTS15	74.2723186788038	-0.53794763754431	0.155667673436665	-3.45574405827539	0.000548776132433625	0.001149463520638
ADAMTS16	20.4113770748472	-0.432220010409815	0.151269867405656	-2.85727764440186	0.00427291896806282	0.00783534325908865
ADAMTS17	79.2077420402873	0.390801309573642	0.0918906853518841	4.25289362112293	2.11025837711606e-05	5.32160340168201e-05
ADAMTS18	20.2923873464283	-1.60432573603563	0.241939832246394	-6.63109385974018	3.33208260268112e-11	1.64680005106146e-10
ADAMTS19	31.4359379159606	0.655436100146219	0.148937588706854	4.40074333039109	1.07880673984254e-05	2.83075322231409e-05
ADAMTS2	36.0185747964507	0.290966430331217	0.121219238622712	2.40033210600203	0.0163802030600227	0.0273768294478305
ADAMTS20	38.9825215257655	0.952658646201671	0.212489178315883	4.48332782757277	7.3487898898782e-06	1.96978389137054e-05
ADAMTS3	48.0419459329166	-1.37113399061061	0.154959042123893	-8.84836387614191	8.8811673178976e-19	9.45515298284555e-18
ADAMTS4	514.564529008242	-0.779730878401222	0.123922992490624	-6.29205979237646	3.13280756825146e-10	1.38707415611853e-09
ADAMTS5	174.475489514657	0.430458449513231	0.0815523915659036	5.27830565416798	1.30383850884063e-07	4.32744242902173e-07
ADAMTS6	200.544670820139	0.493271312348817	0.0871992682243058	5.65682857658803	1.54195632397717e-08	5.6852238691685e-08
ADAMTS7	80.0812282071512	-1.00300306617281	0.134669675807752	-7.44787614700026	9.48548034616646e-14	6.16650200179282e-13
ADAMTS8	187.334559725801	0.120887729338065	0.101642013577682	1.18934803712517	0.234302739595812	0.310275777258228
ADAMTS9	522.607179525971	-0.0800827785714292	0.0938105240596271	-0.853665187079945	0.393290528463446	0.490150304071094
ADAMTSL1	108.862409917126	-0.537081599928249	0.134780496650224	-3.98486141004554	6.75195209904943e-05	0.000159961700649643
ADAMTSL2	543.03207635352	0.191319853401006	0.0594343894187484	3.21900931888188	0.0012863430477926	0.00255800211089981
ADAMTSL3	93.9083738321679	-0.378499614659387	0.133256130421678	-2.84039175880056	0.00450581612902058	0.00823632561052745
ADAMTSL4	72.5231135787448	-1.34292971829475	0.105590032652349	-12.7183379393043	4.67702789823003e-37	3.54104977602531e-35
ADAMTSL5	7.61736667560682	0.0856099059881748	0.122324063574649	0.699861527539356	0.484013785778149	0.58770117030859
ADAP1	825.837265288631	-0.0490663571013727	0.101129907917564	-0.485181467201266	0.627547627114857	0.733175561739923
ADAP2	287.798820267051	-0.743360059652347	0.0751676684934195	-9.88935900968412	4.62982795700771e-23	7.53207961435511e-22
ADAR	6844.63967195827	-0.0652907596763938	0.03212733864246	-2.03224924426527	0.0421284299060765	0.065283645020949
ADARB1	477.978760139661	0.295250809691753	0.0712833035305339	4.14193499835882	3.44387956712121e-05	8.41310117631932e-05
ADARB2	237.041593479625	0.195139363229828	0.119901819709078	1.62749292465537	0.103632450090229	0.148742601533078
ADAT1	209.044113899825	-0.00323204965429778	0.0524283479875663	-0.061646986379664	0.950843958352509	0.999988810474289
ADAT2	107.147771184886	0.103297162692326	0.0547645638646014	1.88620442495837	0.0592674124735386	0.0893938406667387
ADAT3	31.3824501934644	-0.322504854613776	0.0921505698098606	-3.49975974407123	0.000465677668807525	0.000984202803357969
ADC	508.02589956007	-0.192416587619822	0.0527595808199518	-3.64704542055529	0.000265273046536954	0.00057892460322394
ADCK1	334.257280668078	0.256258652431712	0.0428369849861721	5.98218227810461	2.20167685429495e-09	8.90487135335855e-09
ADCK2	789.661470648425	-0.136365032923313	0.0386237076565606	-3.53060441881608	0.000414611325510333	0.000881194552221001
ADCK4	756.144169344523	-0.370038902809866	0.0465211484425344	-7.95420825147857	1.80280663349831e-15	1.3977254265622e-14
ADCK5	132.380866681835	0.270355087760281	0.0620097972951194	4.35987697998103	1.30135583207841e-05	3.37690344772786e-05
ADCY1	1368.73630210788	0.36340018383204	0.140694521928438	2.5829021546189	0.00979731043155993	0.0169651702889917
ADCY10	1.25357769020978	-0.321490308757771	0.13569547723078	-2.3692043045105	0.0178264031990284	0.0296078929271746
ADCY2	3863.00804073919	0.0402287407231617	0.0811753926028276	0.49557802473456	0.620192160278603	0.726379865557636
ADCY3	958.738040652109	-0.0504594029395923	0.0419622385964422	-1.20249549660276	0.229171609871762	0.304299705924158
ADCY4	79.9673190382619	-0.0722756396234962	0.0770285977286832	-0.938296188099798	0.348092218172645	0.440457370619562
ADCY5	501.788033538463	0.421022257216128	0.0751327708796328	5.60370996952356	2.09811674702145e-08	7.62300261445502e-08
ADCY6	1040.5524826763	0.248573540468754	0.0382228590576145	6.50326915875318	7.85929881010463e-11	3.72103435359259e-10
ADCY7	794.62661492476	-0.0958922341439188	0.0536730747647305	-1.78659848656428	0.0740024065022483	0.109315426384268
ADCY8	1215.2972805568	-0.0789047881490861	0.113366961406936	-0.696012199408375	0.486421189853116	0.590260209731142
ADCY9	578.374233786717	-0.0467718981484299	0.0505954919800205	-0.924428171721298	0.355263432760135	0.448234884879071
ADCYAP1	43.4333973591208	0.731141790198375	0.191624299001111	3.81549622886883	0.000135909531820934	0.000308401052898569
ADCYAP1R1	2161.69528711799	0.562338171583824	0.114718115395516	4.9019125675578	9.49080783592674e-07	2.85144310516205e-06
ADD1	9895.04229096578	0.148932136134278	0.0266108715846599	5.5966650945823	2.18514235097573e-08	7.92310318271456e-08
ADD2	1159.65516834654	0.468677598185895	0.0625027089019729	7.49851656703317	6.45440960743308e-14	4.26502360262908e-13
ADD3	5836.51954647302	0.0157098779932131	0.0626843553041304	0.250618801405746	0.802108844129583	0.89372913322527
ADH1A	0.0786807697865967	-0.0336935104574307	0.832399170918408	-0.0404775877182286	0.967712374804852	0.999988810474289
ADH1B	21.6388153154343	-0.103736807577205	0.143572877864973	-0.722537634683117	0.469963995646376	0.572796808513338
ADH1C	0.221230675880641	-0.482503791469902	0.446510345940871	-1.08061055215459	0.279870386667316	0.363263125514052
ADH4	0.249136408673233	-1.24643746016212	0.660766990741781	-1.88634946603924	0.0592478775207706	0.0893736670638501
ADH5	2291.35647030681	-0.134116563781328	0.0280605562927056	-4.77954044753534	1.75696324648922e-06	5.10341176141956e-06
ADH6	0.147002580213937	-0.405337458606025	0.592324502802443	-0.684316547244402	0.493775300248607	0.59748996713756
ADH7	0.379042339764109	-0.668685665914169	0.511694994115981	-1.30680517418274	0.191278887452483	0.258554205829988
ADHFE1	545.66243018699	0.36191660436143	0.0742328448809705	4.87542414603332	1.08574912230738e-06	3.23636757610853e-06
ADI1	1314.53449883355	-0.0810976138419986	0.0439970154110157	-1.84325261803313	0.0652921356262341	0.097509725347274
ADIG	2.24729561047172	-2.16077116317877	0.226385177205677	-9.54466714583374	1.36545371833161e-21	1.92818912807445e-20
ADIPOQ	0.27260161694699	-0.712105869852037	0.509861887115348	-1.39666424937335	0.162514559691538	0.223385176141884
ADIPOR1	1670.33837157647	-0.2920471529177	0.0312244162142123	-9.35316615414478	8.50624658132941e-21	1.10306629745369e-19
ADIPOR2	3480.90561140705	0.0977538284606866	0.0559594525293755	1.7468689210169	0.080660077955813	0.118156990218796
ADK	380.027181052263	-0.0972812111040732	0.0454734018513369	-2.13929917585907	0.0324114464106523	0.0512753614557334
ADM	154.273303886182	-0.969037309870165	0.145591914428548	-6.65584564687991	2.81675746518701e-11	1.39984525882874e-10
ADM2	8.69683812832041	-0.916493463443569	0.14827696942405	-6.18095626720381	6.37144667299987e-10	2.72597104451212e-09
ADNP	2286.82615363822	0.0305123388974675	0.0332989195559585	0.916316183958815	0.359501082010831	0.452739991003979
ADNP2	626.863452223734	0.0392898618202096	0.0458563849708713	0.856802424464272	0.3915540855734	0.48817164953527
ADO	1134.10501621629	0.16683676265294	0.0333097216218224	5.00865076409521	5.48129298685369e-07	1.68988649093524e-06
ADORA1	1285.42711866764	-0.47135281742925	0.0917473222107922	-5.13751034985308	2.7840213949672e-07	8.89377818239684e-07
ADORA2A	110.199572170754	0.0239950406835123	0.0538006732409239	0.44599889254286	0.655598045895002	0.760038135067321
ADORA2B	74.8701606509366	-0.0826831625972533	0.0937363357076747	-0.882082300028329	0.377732303148104	0.472855986484606
ADORA3	782.352608730781	-0.820265217473389	0.0925675829770473	-8.86125780854383	7.91166691487685e-19	8.47801650622486e-18
ADPGK	592.264851012608	-0.365810007997612	0.0320095110495936	-11.4281660669808	3.02428625336001e-30	1.04078802268167e-28
ADPRH	122.831866598623	-0.950925569201997	0.0680637835679542	-13.9710947489806	2.34001842865218e-44	3.51627960061208e-42
ADPRHL1	56.8634851097456	0.239089926178385	0.0836640330964884	2.85773847290683	0.00426671891081621	0.00782689048172744
ADPRHL2	664.514772174354	-0.442269352505782	0.0424993085161311	-10.4065070220593	2.31562708788118e-25	4.72363929792134e-24
ADRA1A	66.0644961916128	0.362298359652152	0.111966951023428	3.23576159161773	0.00121318665454549	0.00242083925947571
ADRA1B	95.3253920885967	0.336023105429249	0.121359053274935	2.76883426791407	0.00562572440488443	0.0101579879756146
ADRA1D	38.6633252807122	-0.767071084557835	0.131328862650603	-5.84084160234148	5.19377692930068e-09	2.01377779896167e-08
ADRA2A	118.59010708895	-0.272805926865227	0.125849913089888	-2.16770850425916	0.0301808720181494	0.0480866423049188
ADRA2B	18.075177951088	-0.915510619902661	0.113107373395722	-8.09417275299655	5.76548182104004e-16	4.7112291260761e-15
ADRA2C	39.9230232473759	-0.0364523595075426	0.105196478428827	-0.34651691817046	0.72895427200134	0.828443210227261
ADRB1	90.5131473747926	0.231218993011157	0.103969829161822	2.2239047123111	0.026154855961458	0.0421369840484057
ADRB2	94.3389652961759	-0.332929696707183	0.0860678283524933	-3.86822466745251	0.000109630632803444	0.000252141489278629
ADRB3	0.899193997370141	0.487615408092238	0.305669151971101	1.59523918245548	0.110658759832459	0.157700549287046
ADRBK1	1972.51314737955	0.048900702311212	0.0394332158197954	1.24008913030785	0.214942428937363	0.287188061741125
ADRBK2	801.278134160436	0.453425417380629	0.0669804356458828	6.769520278695	1.29210103058966e-11	6.66186715221518e-11
ADRM1	1527.56633876947	-0.166324444262666	0.032255648089132	-5.15644403743065	2.51683656810274e-07	8.08352550874572e-07
ADSL	642.1886593744	-0.0260799479167967	0.0324723868338223	-0.803142314430444	0.421892482711678	0.521536895389311
ADSS	663.501789848648	-0.26822825672498	0.0402886333406495	-6.65766581003257	2.7821046705251e-11	1.38332231470792e-10
ADSSL1	80.8940595916532	-0.620381058772528	0.0847802908632341	-7.31751510234041	2.52604716092006e-13	1.56516331012626e-12
AEBP1	3352.67249397929	-1.68223363325328	0.143542105354602	-11.7194437764275	1.01335142271863e-31	4.19071906643197e-30
AEBP2	507.037121385146	-0.211953032118131	0.0349844205047434	-6.05849772727815	1.37398688922492e-09	5.67259478070314e-09
AEN	451.196821637508	-0.180243436688909	0.0819024406801339	-2.20070898000269	0.0277566326860304	0.0444812240432621
AES	6509.16764461088	0.0302096081446632	0.0529764915345908	0.570245542306968	0.568511171015658	0.674623991806387
AFAP1	1995.89669151969	0.536524621285309	0.054951941112195	9.76352446203657	1.61444923083108e-22	2.51030277321563e-21
AFAP1L1	196.385228116124	-0.588939168100573	0.0931296746428775	-6.32386154422816	2.5510632396087e-10	1.13923956151763e-09
AFAP1L2	1098.98136653884	0.530498248329085	0.101993997931439	5.20126928141094	1.97932075592583e-07	6.42422573460841e-07
AFARP1	2.77656565983123	0.100672019871431	0.105076214882099	0.958085709352872	0.338019540970872	0.429367920501492
AFF1	1006.40429391715	-0.245728906019266	0.0531765111061991	-4.62100466742768	3.81886182738487e-06	1.06630205775988e-05
AFF2	366.351257287061	0.779200963256806	0.114836622978612	6.78530022083575	1.15845354645428e-11	6.00425436070366e-11
AFF3	740.269230619588	0.579395049206705	0.069013609415133	8.39537381274334	4.64414327658787e-17	4.20902211784679e-16
AFF4	2874.62528090434	0.232750117911144	0.0382949162727131	6.07783331483582	1.21817283077404e-09	5.05581534340858e-09
AFG3L1	282.521203706033	0.0774993803475154	0.0516942933335656	1.49918637725519	0.13382528809762	0.187551672803762
AFG3L2	1155.97030718001	0.000768447666979634	0.0304953575898048	0.0251988409946221	0.979896361416167	0.999988810474289
AFM	0.0370275348786353	-0.196859518669267	2.89081430390498	-0.0680982927209623	0.945707389415107	0.999988810474289
AFMID	333.837733528527	-0.32387741740177	0.0675008165829362	-4.79812591605957	1.60157089153863e-06	4.67758501482758e-06
AFP	1.3969440918945	-3.22315455654225	0.432883140016979	-7.44578445909403	9.63700380334568e-14	6.26087194286666e-13
AFTPH	817.314178221789	0.0642563103219342	0.0278573194624403	2.30662215754715	0.0210758932071818	0.0345502130066101
AG2	868.471192606302	0.338052293337059	0.0923064135406083	3.66228391257277	0.00024997659062626	0.000547484333163989
AGA	332.229898034707	-0.499767654664375	0.0489021043133412	-10.2197576501433	1.61744747210046e-24	3.01795767661587e-23
AGAP1	625.605485171649	0.210758797213588	0.0617777273696824	3.41156604794463	0.000645908511588284	0.00134163860405354
AGAP11	12.9927509244543	-0.0596525795819123	0.103810402049932	-0.574630079490682	0.565541504506375	0.671748898122026
AGAP2	2481.85056678184	0.557453578144285	0.107796929701305	5.17133075764712	2.32432729822328e-07	7.49334799631924e-07
AGAP3	3093.78865469748	0.210834317395457	0.0461819409949065	4.56529788167004	4.98785565348088e-06	1.37035503892214e-05
AGAP4	312.507807595272	0.413228546839788	0.0635298212877498	6.50448149331516	7.79618131683587e-11	3.69356989703765e-10
AGAP5	40.5623916440059	0.339643366956727	0.0544845677506092	6.23375353754054	4.55389362187823e-10	1.97931984867902e-09
AGAP6	167.246189498608	0.325230690724133	0.0615662525456273	5.28261307577722	1.27354180207246e-07	4.23188223730526e-07
AGAP7	19.1945476002004	0.0844034806046495	0.11470634142874	0.735822270620359	0.461838866062326	0.564256335553431
AGAP8	53.5398247516001	0.389992815740193	0.0845909568198134	4.6103369722004	4.02016799237232e-06	1.11775433516736e-05
AGBL1	0.384686650649202	0.850380072451977	0.277776449546144	3.06138289923931	0.0022031715161809	0.00423612339285222
AGBL2	9.36871478738367	-1.76545505540726	0.159599944876161	-11.0617522880546	1.92303400732309e-28	5.51017822913466e-27
AGBL3	12.7132448821367	-0.403739198148065	0.07309790229327	-5.52326654365889	3.32754339783047e-08	1.1806541417861e-07
AGBL4	38.3355398943301	0.0281004642637263	0.136815468073576	0.205389526925527	0.8372678021621	0.924012820853335
AGBL5	541.606606192355	-0.0569888191170217	0.0304062010570373	-1.87424989429358	0.0608959900793868	0.0915556071727434
AGER	103.5962024243	0.235527734802714	0.0873844918192097	2.69530359334238	0.0070324523553143	0.0124771360625833
AGFG1	1917.03694246945	0.0168570718442438	0.0271417737814103	0.621074804469463	0.534550406007554	0.639688504659373
AGFG2	1105.8676289399	-0.294347732905272	0.0666267975838362	-4.41785803279673	9.96838585447391e-06	2.62722821723549e-05
AGGF1	1099.92099991513	-0.0947926560110126	0.0238372262044471	-3.97666470074979	6.98885993556705e-05	0.000165236257304393
AGK	687.016448899756	-0.156088563331053	0.0335123453098013	-4.65764367990687	3.19849186772995e-06	9.00877270228417e-06
AGL	557.208906595577	-0.31487922577083	0.049543967470781	-6.35555127789338	2.07680453930907e-10	9.3701346221176e-10
AGMAT	23.6244027794288	-0.363419869953073	0.100475180288191	-3.61701137445767	0.000298024212232941	0.000645888651085043
AGPAT1	3001.01561431068	0.0980693920844038	0.0225583763217028	4.34736040776366	1.37785707473534e-05	3.565078406436e-05
AGPAT2	208.072958522318	-0.526311394297644	0.0713633719128389	-7.37509145364466	1.64232275167907e-13	1.03519447219989e-12
AGPAT3	3517.85416074654	-0.0343678850234952	0.0387300212010916	-0.887370674161327	0.374879366784014	0.469702777362569
AGPAT4	1187.05371627655	0.106716813061928	0.0504008646709916	2.11736075875994	0.0342292419250136	0.0539171502995833
AGPAT5	2643.8038200896	0.0258599060278943	0.0350529911071425	0.737737500028208	0.460673979526127	0.563077757651152
AGPAT6	2000.71356390099	0.0142242814982473	0.0258574130050876	0.550104586852851	0.582247640802975	0.688918964308863
AGPAT9	11.2545883603019	-0.618904746557741	0.146105795676522	-4.2360040797286	2.27532644085544e-05	5.70861598116739e-05
AGPHD1	16.8089522991418	-0.378490331728657	0.0704134438580118	-5.37525664121585	7.64736768652506e-08	2.60537267063423e-07
AGPS	972.674535762563	-0.0116423057443408	0.0289184668607654	-0.402590697508113	0.687249354190644	0.790170173310136
AGR2	1.05966278099303	-0.931079201578985	0.506640251380471	-1.8377521309095	0.0660989382814135	0.0985874829572378
AGR3	1.36497862144071	-3.80436927559338	0.755009812755194	-5.03883421290965	4.68375968850762e-07	1.45288070388075e-06
AGRN	4384.26693356969	-0.0152837392198068	0.0584729022702895	-0.261381573795639	0.793798265244547	0.886325516241572
AGRP	0.322569050201663	-0.505435084663382	0.262796403756884	-1.92329528653279	0.0544429762104025	0.0826299141635909
AGT	13862.0874532569	-0.304554726134947	0.0869553362571091	-3.50242709929199	0.000461039929091178	0.000975029115186919
AGTPBP1	610.230576183678	-0.0737716996892328	0.0547340492132954	-1.34782097706217	0.177715969283089	0.242032576126858
AGTR1	4.11350954772393	-1.11652328431019	0.154360765750589	-7.23320643611105	4.71721500329272e-13	2.84405443613529e-12
AGTR2	0.0243050900801414	0.0432624465126816	2.00749248896692	0.0215504898526146	0.982806527721579	0.999988810474289
AGTRAP	473.899540560931	-0.718421225273322	0.0665666890283079	-10.7925035142999	3.73474647170565e-27	9.12140003666572e-26
AGXT	0.198459262361833	-0.831340502900056	1.1152588155405	-0.745423834643397	0.45601553954891	0.558528241414902
AGXT2	0.0461991178150207	0.0211991249343456	1.61921635911961	0.0130922126712404	0.989554224055224	0.999988810474289
AGXT2L1	3030.1845187997	0.28254213804935	0.138521849506374	2.03969365884297	0.0413808469005515	0.0641810717247781
AGXT2L2	372.486049347868	-0.323451942644264	0.0471793537818883	-6.85579425567363	7.09173827549915e-12	3.74666849042407e-11
AHCTF1	1204.98887206211	0.092915941478318	0.0430997649670918	2.15583406427535	0.0310966245382523	0.0493937750371578
AHCY	2125.57867081501	-0.0641750382664661	0.0320487637171088	-2.00241852799479	0.0452397374212282	0.069666293603761
AHCYL1	14830.9040734233	-0.1238327957674	0.0850754033342647	-1.45556519174944	0.14551285631045	0.202089782451758
AHCYL2	2869.67913656158	0.00709724808435078	0.062948426302717	0.112747029611516	0.910231114696211	0.986994573801637
AHDC1	1529.50144519771	-0.0613123938102624	0.0437580017741825	-1.40116987349356	0.161163280888834	0.22162062062848
AHI1	349.953853423761	0.0825713859443494	0.0488672499843535	1.68970805541109	0.0910838213911842	0.132187040997159
AHNAK	11810.4476170746	0.0319534740584195	0.0825970271125624	0.386859856528173	0.698859961459433	0.800577883126961
AHNAK2	304.196352711388	-0.320014150447449	0.131397888093666	-2.43545885775066	0.0148729158438342	0.0250276413391927
AHR	368.424443636138	-0.880549265667672	0.0966161885955902	-9.11388948857647	7.94802583944762e-20	9.42511377406786e-19
AHRR	55.2388167324705	-0.108588500946507	0.0797041347941303	-1.3623948271565	0.173073315360915	0.236413032605622
AHSA1	1869.91546906411	0.0929909223814021	0.0316438636115255	2.93867157067168	0.00329622161598671	0.00615734698336482
AHSA2	623.473277242191	0.277100611671162	0.074413681839203	3.72378579882575	0.000196257457397958	0.000435599058392017
AHSG	4.94671764406078	0.830808335982665	0.149208761222002	5.56809351661687	2.57541601298443e-08	9.26312154496591e-08
AHSP	0.461164906821663	-0.560851303419905	0.367433946955934	-1.52640034505894	0.126910191777192	0.178712863948353
AICDA	0.04533385146519	-0.142412754113029	1.53454472891536	-0.0928045637442503	0.926058825317344	0.998419170303054
AIDA	839.948314434964	-0.352716341556159	0.0340588438434645	-10.3560867531868	3.92701243643729e-25	7.84804465089015e-24
AIF1	700.436040256341	-0.88689489971822	0.0897919410602136	-9.87722159969208	5.22618403996036e-23	8.46031519955755e-22
AIF1L	3619.08266762437	-0.158668213755544	0.0648683169440833	-2.44600478677929	0.0144449082684011	0.0243469491620409
AIFM1	573.400905353395	-0.0406364148205122	0.0296469767780902	-1.37067651533844	0.170475818877518	0.233269602016123
AIFM2	203.789984399491	0.0846169304439431	0.0490729567895067	1.72430878389697	0.0846521144145763	0.123572626789094
AIFM3	406.158738652537	-0.480591293662921	0.153896671486454	-3.12281798573676	0.00179128487765104	0.0034915776627944
AIG1	790.650933186232	-0.0248835023816204	0.0406226091801022	-0.612553031030042	0.540171922901808	0.645301875368497
AIM1	65.4887675666769	-1.82088543458709	0.12760263279132	-14.2699675920085	3.3673506735737e-46	6.19498112236432e-44
AIM1L	0.0956275143877816	-0.350236434458327	0.755714764288377	-0.463450564960351	0.643041441466212	0.748390136884379
AIM2	19.1226386479441	-0.189964403071599	0.103727982334939	-1.83137084897884	0.0670452092996185	0.0999080200653286
AIMP1	926.672978201775	-0.0227761834785154	0.0265626722167582	-0.857450759948241	0.391195816634722	0.487755868409837
AIMP2	544.369807647538	-0.074429168234649	0.0377361614024337	-1.97235663269791	0.0485689088257763	0.0743336160966728
AIP	1334.32332676441	0.133309524614055	0.0459953677473833	2.89832500842739	0.00375161598437701	0.00694410537399731
AIPL1	0.273519080581057	-0.264862240256381	0.367528275745312	-0.720658130913237	0.471119878716113	0.573992375597369
AIRE	7.89189160980622	0.0231740529729024	0.157530438911956	0.147108413668894	0.883046448985503	0.964691123163307
AJAP1	117.787074223728	0.417938158472871	0.110042662532735	3.79796479704901	0.000145889036568355	0.000329715922485426
AK1	1632.98386794782	-0.270982699137383	0.0644101872663431	-4.20714037077457	2.586225094008e-05	6.441022390631e-05
AK2	1133.30249475175	-0.535983996379078	0.0476264464552639	-11.2539153405563	2.21534770272807e-29	6.91111244503993e-28
AK3	1743.15671669294	-0.102349841707015	0.0404657134570213	-2.52929784163379	0.0114290993478908	0.0195721462081974
AK3L1	200.625889898876	-0.655163507487199	0.0904469934307227	-7.2436184182177	4.36869451013242e-13	2.6436443723319e-12
AK5	1145.91531176098	0.104684909471769	0.153917919664639	0.68013464384043	0.496419210240246	0.600135856634481
AK7	11.6722960245724	-1.62258511411711	0.186502243498219	-8.7000836219571	3.31639702765225e-18	3.35474180315182e-17
AKAP1	1567.73642922558	0.255197613777145	0.0376641825315191	6.77560474234597	1.2388694958462e-11	6.39746747789416e-11
AKAP10	475.465918814425	0.118256749698745	0.0384985922693292	3.07171620384043	0.00212831970008642	0.0041046314584306
AKAP11	2959.07919251468	0.322388455120731	0.0512830049414336	6.28645796963158	3.2479089576107e-10	1.43416527210782e-09
AKAP12	1831.11111993984	-0.126281512404414	0.0938780956140276	-1.34516482869029	0.178572011496412	0.243097513575855
AKAP13	2106.61582752786	0.028653632215209	0.0423838637135279	0.676050499050266	0.499008583487356	0.602895965503504
AKAP14	2.32009412890162	-1.32745916154009	0.277362345749606	-4.78601072525711	1.70128969253605e-06	4.95377589324022e-06
AKAP2	307.182893546951	-0.376411914921499	0.0980217138984429	-3.84008705776647	0.000122990688059003	0.000280736513733938
AKAP3	97.3473476076252	-0.0570014748111551	0.0661505668281934	-0.861692915787096	0.388856524979953	0.485269474719816
AKAP4	0.0038147895060307	-0.0110602151684007	2.89081430390498	-0.00382598603911026	0.996947312257175	0.999988810474289
AKAP5	202.544651112487	0.519786561107599	0.124172402347517	4.18600712622833	2.83904438314332e-05	7.02622437543076e-05
AKAP6	2876.3706389963	0.385248804529225	0.0619785274883931	6.21584313375905	5.10497839929474e-10	2.21054772965501e-09
AKAP7	563.270192149184	0.279340411088171	0.049583426895772	5.63374555928466	1.76337131660684e-08	6.45683861000848e-08
AKAP8	602.794843491368	0.0150816695608109	0.0251513132423553	0.599637458906644	0.548747876999125	0.654434869667258
AKAP8L	1298.26498568167	0.120628957005424	0.0344511691813394	3.50144740721205	0.000462738292612817	0.000978410664885424
AKAP9	1351.80272585981	0.315254111519265	0.044758038639802	7.04351935651889	1.87443947404721e-12	1.05453961264988e-11
AKD1	181.154480285416	-0.169287373862224	0.0539350866650735	-3.1387244246675	0.00169684942735296	0.00331538272728963
AKIRIN1	1588.80495980543	-0.342004630423433	0.0405945251433257	-8.42489545612196	3.61072491559612e-17	3.3105319032841e-16
AKIRIN2	1099.75252485131	0.0111715207502456	0.0265902866740636	0.420135400839524	0.674386542764239	0.777925525597073
AKNA	878.541073070196	0.172398296940709	0.0514360210175646	3.35170360245863	0.0008031595670297	0.00164501051680154
AKNAD1	20.0227292695756	-0.683062269856554	0.146372529424648	-4.66660153063893	3.06222363220339e-06	8.64103672590651e-06
AKR1A1	1372.16510123983	-0.234750315316063	0.0380803787728782	-6.16460032386174	7.06613861968975e-10	3.00880248169138e-09
AKR1B1	2562.08981058315	-0.229628021241689	0.03187514256177	-7.20398413267328	5.84781742595443e-13	3.49042710824478e-12
AKR1B10	2.68215412591968	-1.30311528854276	0.332215918159318	-3.92249503203467	8.76367009384872e-05	0.000204278088570056
AKR1B15	0.633077696459811	-1.3113735433508	0.360067387267374	-3.6420225483432	0.000270504372520068	0.000589230781571046
AKR1C1	451.312213594019	-0.63430231748599	0.127700754269708	-4.96709922438141	6.79618191289967e-07	2.07350962423171e-06
AKR1C2	86.8235284107528	-0.483846550278729	0.130555962900306	-3.7060471197949	0.000210519150039049	0.000465416606976491
AKR1C3	743.202888334844	0.148764152990471	0.0979177204438829	1.51927712691932	0.128692754636404	0.181002920478538
AKR1C4	0.247956001535185	-0.657334631044727	0.611986547133834	-1.07409980517264	0.282777951879434	0.366698549588053
AKR1CL1	0.00380942475907154	-0.0110602151684007	2.89081430390498	-0.00382598603911026	0.996947312257175	0.999988810474289
AKR1D1	0.0762120509191399	-0.219123897749039	0.90298082644932	-0.242667276348129	0.808263159489383	0.898907361273927
AKR1E2	3.99705925437326	-0.158544922756197	0.131970828730609	-1.20136339432885	0.229610269192841	0.304841043303505
AKR7A2	898.416829491883	-0.299872403463955	0.044055094673112	-6.80675880256309	9.98220782083188e-12	5.21634618935693e-11
AKR7A3	24.2383800294961	-0.387050237497357	0.091615960164611	-4.22470317182645	2.3925591804252e-05	5.98672015592603e-05
AKR7L	20.1663069567104	-0.0135649864574766	0.0750609406428038	-0.180719643816202	0.856587639128061	0.94174407574621
AKT1	3093.56691385854	0.031633010332938	0.0295170365973102	1.07168652343036	0.283860855913634	0.367910536398542
AKT1S1	1004.91947444082	-0.182316595556739	0.0391662934974733	-4.65493615239594	3.24081117808549e-06	9.11753151931011e-06
AKT2	1973.36700110404	-0.226071813833545	0.0439292552304622	-5.14627012562641	2.65716720317499e-07	8.51478697615167e-07
AKT3	1523.44183047252	0.441560841858408	0.0543239694238005	8.12828750442802	4.35397556260624e-16	3.59815318849302e-15
AKTIP	1176.83861678203	-0.0687586704021746	0.032614288636028	-2.10823762460418	0.0350104403082107	0.0550463672098344
ALAD	1981.34246245029	-0.204859871580977	0.0511113942578139	-4.00810571802507	6.12077216522811e-05	0.000145868523090212
ALAS1	914.146872938913	-0.117432664563834	0.0339449617655475	-3.45950204259834	0.000541175172680659	0.0011347500292095
ALAS2	4.43481137809976	-0.067363914273663	0.287488057942605	-0.234319000085603	0.814737336533424	0.90472450402175
ALB	18.9499999213309	0.076109314112951	0.130202844294213	0.584544174326717	0.558854254199192	0.664876465243025
ALCAM	4622.63322782734	0.293256837683317	0.0549999611229327	5.33194627225002	9.71656900315269e-08	3.27406129454058e-07
ALDH16A1	353.844705270325	-0.417516323826766	0.0575566873293864	-7.25400197960311	4.04634200684532e-13	2.45461455792759e-12
ALDH18A1	1184.01583135461	0.111667704531822	0.0408032344537188	2.73673658539207	0.00620519579645861	0.0111216679644257
ALDH1A1	984.724795426293	-0.518212910834586	0.108626977606133	-4.77057285634476	1.8370272483985e-06	5.32575572676354e-06
ALDH1A2	57.6594001057987	-0.625159780165259	0.110629039960937	-5.65095548497938	1.59558412037742e-08	5.86866095097711e-08
ALDH1A3	57.2274623953884	-2.29446677029979	0.209555672687916	-10.9491990403756	6.70377623918615e-28	1.78812784916503e-26
ALDH1B1	504.625820321002	0.121882916163212	0.0394948555317806	3.08604537279887	0.00202837867517213	0.00392496158662768
ALDH1L1	2321.85659376337	-0.438763076181406	0.101134317277532	-4.33841932187423	1.43511147280065e-05	3.70542619911869e-05
ALDH1L2	504.030322241268	0.673087247348082	0.0775534421312438	8.67901190264406	3.99221923518649e-18	3.99933005825171e-17
ALDH2	8173.90258376985	0.274766533792896	0.0650176623727595	4.22602910909966	2.37851236904733e-05	5.95308531273956e-05
ALDH3A1	11.217162365684	-2.84442178547233	0.181165561942926	-15.7006759726688	1.49639027598265e-55	7.01343871017108e-53
ALDH3A2	2175.86779239161	-0.314450145059429	0.0375908659048765	-8.36506788258466	6.0080325471093e-17	5.37338122171043e-16
ALDH3B1	218.56033198443	-0.746432793723715	0.0706124661771404	-10.5708359179977	4.06851855945282e-26	9.09066831360144e-25
ALDH3B2	0.400772535866272	-0.441511204035499	0.310971436605194	-1.41978057166722	0.155671572794754	0.21474386198071
ALDH4A1	2495.35111371302	-0.350628003620466	0.078471071159839	-4.46824541118174	7.88637992375756e-06	2.105280564133e-05
ALDH5A1	3037.3482180371	0.46264705030712	0.0518880750735715	8.91625001796922	4.82343856537405e-19	5.26232950556002e-18
ALDH6A1	1402.97118292977	0.342522048838257	0.0727523725795543	4.70805331418864	2.50093697774729e-06	7.12459398074608e-06
ALDH7A1	2372.14117677878	-0.205510200116663	0.0828355613008011	-2.48094172224407	0.0131035794813839	0.0222442188764265
ALDH8A1	22.3582207676771	-0.0462557963128087	0.100534135942523	-0.460100401511918	0.645444155909305	0.75025392958464
ALDH9A1	3244.50833081751	-0.0127029459102341	0.0410944665392135	-0.30911572725035	0.757233496052341	0.854415990472907
ALDOA	20295.8167887404	-0.0449130218543478	0.0461077097030835	-0.974089195572086	0.330012253666561	0.42028150439453
ALDOB	8.2988411182477	-0.178925884986435	0.0931768709847806	-1.92028218049585	0.0548222659622352	0.083167101222765
ALDOC	23488.9177210925	0.486555315616567	0.0870917674136679	5.58669699864431	2.31428993585694e-08	8.37248793469916e-08
ALG1	376.262262265299	-0.14939392993372	0.0435534027932373	-3.430132213617	0.00060328721206995	0.00125828658291979
ALG10	54.96729766485	-0.145300124489067	0.0544408888376742	-2.66895209816111	0.00760883009689675	0.0134307586493376
ALG10B	325.298350724222	0.118791473513018	0.0430263557623783	2.76090018334502	0.00576422906159255	0.0103899687828449
ALG11	12.6175849187142	0.229030830624667	0.0649099261634187	3.52844078189295	0.000418015463796345	0.000887567080663472
ALG12	287.896139290739	-0.251899717190357	0.0329393877263745	-7.64737096156349	2.05129920968137e-14	1.42684893790027e-13
ALG13	483.592635950914	0.0895604197022063	0.029402836272595	3.04597892774315	0.00231924088689468	0.00443848501443922
ALG14	141.618207593165	-0.548190281651701	0.0412282840889973	-13.2964612465644	2.42685260758387e-40	2.56841900969293e-38
ALG1L	25.6021020569431	0.142740547541919	0.115942449853709	1.23113275355164	0.21827321713938	0.291302256229742
ALG1L2	0.0212434614598801	-0.0221525207890693	2.60187889087723	-0.00851404762410001	0.99320685492228	0.999988810474289
ALG2	433.720183884562	-0.230338078189797	0.0271563172496766	-8.48193354319942	2.21482067745942e-17	2.080092797509e-16
ALG3	406.114372094742	-0.213041640241386	0.0388438451518067	-5.48456620112638	4.14485249035728e-08	1.45517070220587e-07
ALG5	381.833055008078	-0.166013320393849	0.0322883415213211	-5.14158710456606	2.72427298394048e-07	8.71280482353671e-07
ALG6	178.486798782096	-0.421728729214615	0.0531916325021524	-7.92847877337756	2.218465679854e-15	1.69725988759915e-14
ALG8	494.839149964936	-0.19186307052271	0.027818833964326	-6.89687679824213	5.31582448579857e-12	2.84507898322308e-11
ALG9	584.408137039599	0.116169683218139	0.0259094235600465	4.48368459255409	7.33650798158416e-06	1.96702750772929e-05
ALK	147.741443590232	0.164833172821548	0.129831578361086	1.26959230490995	0.204229891870068	0.274252365199692
ALKBH1	208.454907762259	0.0581628653310364	0.0295104604963034	1.97092367766752	0.0487326063711357	0.074560963501928
ALKBH2	462.614211984859	0.0941603871087132	0.0473977894351924	1.98659870493454	0.0469668848602982	0.0720722738131408
ALKBH3	271.485094872589	-0.0543537532018385	0.0362945423108284	-1.49757373261109	0.134244035606501	0.188084970883556
ALKBH4	476.963261957111	-0.0533128101861058	0.0344096712292332	-1.54935540740689	0.121296307133779	0.171432926904684
ALKBH5	1977.08045483157	-0.0977441719228968	0.0221771736335252	-4.40742240368885	1.04608058483044e-05	2.74744447129917e-05
ALKBH6	117.530028669608	-0.235906830571755	0.0561717396810492	-4.1997422887606	2.67218950612774e-05	6.64251173483072e-05
ALKBH7	693.844052299715	0.0116188069650702	0.055195408091856	0.210503144495902	0.833274997691615	0.920845356175796
ALKBH8	240.036032400549	-0.032136501617834	0.0344558046430322	-0.932687596495667	0.350981290857931	0.44368524984192
ALLC	0.675963625329315	-0.929355586091247	0.301072765961544	-3.0868138575176	0.00202314242487129	0.00391598413309649
ALMS1	600.723815054062	0.172211801255839	0.0431381730310171	3.99209769806467	6.54913786995021e-05	0.000155512399240012
ALMS1P	8.32846336816612	0.630851584256461	0.0907505096106133	6.95149357246895	3.61438881995496e-12	1.97143928846809e-11
ALOX12	5.15070164860572	0.241353028679358	0.0552464078378896	4.36866464490441	1.25008554719909e-05	3.24943008010221e-05
ALOX12B	11.731291124626	1.13757804327473	0.165991886039413	6.85321475897094	7.22085551112799e-12	3.81079197685133e-11
ALOX12P2	4.6639717156052	-1.01845242291749	0.176348266670932	-5.7752335315999	7.68464262951104e-09	2.919748893301e-08
ALOX15	2.02885905169104	-1.69346789336037	0.269308623074098	-6.28820523468506	3.2115715806558e-10	1.41907489484196e-09
ALOX15B	94.637305116764	-0.991533016701426	0.188986135276515	-5.24659131872644	1.54939067859896e-07	5.0926290713342e-07
ALOX5	252.172483542163	-1.12122245304639	0.0986573066812889	-11.3648191985261	6.25939306836955e-30	2.08840936526872e-28
ALOX5AP	394.998108069557	-1.33157020637091	0.10903061906321	-12.2128097392434	2.65557142330424e-34	1.48508305306091e-32
ALOXE3	8.37670763340692	0.511768004632231	0.142277246358114	3.59697715363498	0.000321936747634348	0.000695034533579967
ALPI	0.00574545074926101	-0.000172041700941203	2.89081430390498	-5.95132315170865e-05	0.999952515311437	0.999988810474289
ALPK1	133.320673558739	-0.968380778687839	0.0807471272208673	-11.9927582815303	3.87773877997397e-33	1.86178750936067e-31
ALPK2	10.6098448186081	-0.507720221727841	0.190664299735469	-2.66290135296571	0.00774701214803019	0.0136477478193999
ALPK3	231.607288759296	-0.823446272262195	0.0868000298936325	-9.48670493859589	2.38452636647225e-21	3.28477267487798e-20
ALPL	570.93128458415	0.271153015032864	0.0726802332080277	3.7307669921306	0.000190897718258687	0.000424468720650882
ALPP	0.0789440891969405	-0.0772896638724902	1.59421958816275	-0.0484811907006877	0.961332754459187	0.999988810474289
ALPPL2	0.0349532477642796	-0.109545963837759	2.50316516505261	-0.0437629787147733	0.965093337501032	0.999988810474289
ALS2	855.884832149459	0.156700764901658	0.0297167990820248	5.27313740854557	1.3411107415039e-07	4.44114396839667e-07
ALS2CL	56.5588583602281	-0.216234266116066	0.098728065178215	-2.19020058506909	0.0285096928371598	0.045575223607235
ALS2CR11	3.43033314630531	-0.113655164871139	0.103426432871045	-1.09889862500476	0.27181228648057	0.35398735196336
ALS2CR12	8.43482223027401	-0.714123173931124	0.132998015698838	-5.36942728189414	7.89870775223875e-08	2.68774523946102e-07
ALS2CR4	782.586525401754	-0.292488590722313	0.0403636633756929	-7.24633410996212	4.2820306592492e-13	2.59359303160986e-12
ALS2CR8	261.658113659252	0.356436963991152	0.0442536520647344	8.05440788185697	7.98644777767698e-16	6.42735995517462e-15
ALX1	0.472788528363413	-2.05819645935584	0.662324800249212	-3.10753343160547	0.0018865564613554	0.00366747619413205
ALX3	48.7693723372993	-0.206236822294744	0.0646959782223193	-3.18778427904804	0.00143367451752309	0.00283153234448099
ALX4	1.97051101085212	-1.42377390897459	0.262550037762576	-5.42286689846949	5.86506654812706e-08	2.02231275179333e-07
AMAC1	0.0709731940435154	0.271837405143967	0.87707140300665	0.309937599392812	0.756608409525711	0.853857509689482
AMAC1L2	1.04266794824814	-0.0464427303028	0.122387591349147	-0.379472541217911	0.704336991121191	0.805394927111278
AMAC1L3	0.801003363001032	0.791923916737944	0.163224054815637	4.85175985630567	1.22370740098312e-06	3.62835972109547e-06
AMACR	329.744524735548	-0.0833711362384527	0.0415487774376031	-2.00658458275114	0.0447939142695415	0.069077520882416
AMBN	0.0556743506124887	-0.0879713072495467	1.45295411638819	-0.0605465143443272	0.951720370685895	0.999988810474289
AMBP	0.393250861688654	-1.53157541393875	0.674898655260093	-2.26934133295689	0.0232475768427805	0.0378205413347219
AMBRA1	921.992882471328	0.121973918025573	0.0268630933499123	4.54057604002523	5.61007407875569e-06	1.5299848744847e-05
AMD1	1885.90671891652	-0.209109834353028	0.0418365843948764	-4.99825302131111	5.78520428769419e-07	1.77912429937916e-06
AMDHD1	13.1481197380524	-0.0872871513861002	0.0900470550839045	-0.969350428004195	0.332370376738228	0.423010982484775
AMDHD2	219.476223472095	0.0803416627629012	0.0499163282903325	1.60952669225996	0.107501223262631	0.153640361455477
AMELX	0.0546820040443218	0.0756826127642018	1.32459647567401	0.0571363537153392	0.954436577634153	0.999988810474289
AMELY	0	0	0	0	1	NA
AMFR	3614.11395922803	-0.155515466502643	0.027785159988286	-5.59706931931316	2.18005557594512e-08	7.90611533022838e-08
AMH	136.600031044516	0.790760619106595	0.125169371588931	6.31752487903779	2.65785663042021e-10	1.18531734865931e-09
AMHR2	0.0506376529862409	-0.251547569966819	2.89081430390498	-0.0870161634481407	0.930658664266698	0.999988810474289
AMICA1	32.7525513325792	-0.648853464274293	0.163411860529054	-3.97066321975404	7.16728343683595e-05	0.000169231107657569
AMIGO1	268.215973594158	0.203013912775012	0.0906139594419475	2.24042646436915	0.0250632497991853	0.040539858035905
AMIGO2	112.78575601538	-1.39398956230421	0.125613589174036	-11.0974423346255	1.29085143457319e-28	3.77009057708801e-27
AMIGO3	137.000697896728	-0.0630316393842708	0.047972473913339	-1.31391263035831	0.188875607794183	0.255533769032887
AMMECR1	109.045581837714	-0.111222354211409	0.0485260396179369	-2.29201383601677	0.0219048447928227	0.0358107191883327
AMMECR1L	673.530027433969	0.110552518528062	0.0252457981828892	4.37904627642122	1.19199820489059e-05	3.11076291439364e-05
AMN	0.953564110718486	0.00379380008964062	0.198923740972385	0.0190716305207998	0.984783962877861	0.999988810474289
AMN1	403.455643746269	0.113127111168638	0.0456503971724276	2.47811888122992	0.0132077130310349	0.0224036045683689
AMOT	2235.34915318204	-0.124251473361583	0.0852651368647734	-1.45723654391877	0.145051096301967	0.201493159980237
AMOTL1	1656.41164116284	0.179807502368092	0.0535906064138619	3.35520559292612	0.00079306020956687	0.00162550918631027
AMOTL2	2704.46825452194	0.375558908946222	0.0697731400793552	5.38257140955798	7.34292313229013e-08	2.50729300709681e-07
AMPD1	0.0568827752654322	-0.229808434705132	1.92487705149436	-0.11938863031627	0.904967468562013	0.982477642766558
AMPD2	1711.98064265774	0.138456918911425	0.041489401234765	3.33716358373011	0.000846381167220464	0.00172706678519072
AMPD3	336.773134750432	-0.688563667813343	0.0817554416011708	-8.42223654264357	3.69364367575887e-17	3.38183143057271e-16
AMPH	770.636507430253	0.416789787593461	0.10939732835069	3.8098717206089	0.000139038914466849	0.000315102582463726
AMT	245.164318924418	0.296513047135416	0.0881906442978672	3.36218257045421	0.000773289775055105	0.00158829395053837
AMTN	0.0637533705441766	-0.0443838927981223	2.89081430390498	-0.0153534222997885	0.98775022266179	0.999988810474289
AMY1A	2.65122831859898	-0.0595908440763118	0.148222818969667	-0.402035560317516	0.687657855852798	0.790455176202179
AMY2A	3.36212241534492	0.337661759309626	0.133473845605176	2.52979718819559	0.0114128475465291	0.0195477163450296
AMY2B	249.809156328079	-0.00546720645335927	0.0862853039955343	-0.0633619654818881	0.949478273514317	0.999988810474289
AMZ1	265.743830448658	1.10990343117674	0.0955864501220016	11.611514286388	3.60179793953641e-31	1.38036715406044e-29
AMZ2	1734.69400608208	-0.116502680487939	0.0273916127439138	-4.25322457560755	2.10714065101786e-05	5.31442200067732e-05
AMZ2P1	441.482973745947	-0.223694339647617	0.0593306664863262	-3.77029878299397	0.000163052221729989	0.000365859225436549
ANAPC1	430.607487829175	0.0901008608207763	0.0414452605278293	2.17397260080621	0.0297071929525993	0.0473702789203659
ANAPC10	101.405217936027	-0.133775364633313	0.0284484561386831	-4.70237695786279	2.57150184445987e-06	7.31397396448383e-06
ANAPC11	1496.48815403273	-0.136780443994534	0.0475407506320125	-2.87711999024327	0.00401322959905722	0.00739496626953491
ANAPC13	1322.4185204059	0.0126161233960707	0.0279585614503431	0.451243652806604	0.651813950950337	0.756230189453491
ANAPC16	1240.33993029304	-0.0762623270054263	0.0347198694213066	-2.19650385432113	0.0280558995939707	0.0449154508382656
ANAPC2	1128.02485920219	0.204341213380719	0.0341907064110618	5.97651335202037	2.2796387794516e-09	9.20379065911089e-09
ANAPC4	456.001303877805	-0.00870212298038278	0.029219565100474	-0.297818360761353	0.765841800237198	0.862053741861233
ANAPC5	2351.72481441809	-0.004376307476661	0.0277638224846503	-0.157626259103209	0.874751310470583	0.957451643860923
ANAPC7	1098.10117807601	-0.0939939507841238	0.0244075082179093	-3.85102608365218	0.000117623968952283	0.000269235794049498
ANG	41.8416786002312	-1.45603580101469	0.0983999441590388	-14.7971201961393	1.52889680038685e-49	4.06707209670476e-47
ANGEL1	929.497403585045	0.404300509064167	0.0428173743050436	9.44244049585598	3.64196142490534e-21	4.92728595527571e-20
ANGEL2	799.715565407385	0.163926758019873	0.026198652232171	6.25706836241664	3.92281487970104e-10	1.71715834794118e-09
ANGPT1	144.52007638578	-1.30225626223173	0.128403100130454	-10.1419378574869	3.59888353359073e-24	6.45209675398302e-23
ANGPT2	271.560069958634	-0.755089158343202	0.130144191227033	-5.8019428391235	6.55509099499402e-09	2.5094703663255e-08
ANGPT4	4.60902702010146	0.468900463896668	0.1528549887004	3.06761635902984	0.00215773436650152	0.00415647333443413
ANGPTL1	127.743961841322	-0.0376574538569201	0.129998646602758	-0.28967573771742	0.772064319357637	0.867470669323921
ANGPTL2	4743.86635103744	0.835853749957328	0.0895240096598878	9.33664335559627	9.94365361064025e-21	1.28354636934723e-19
ANGPTL3	0.082010541718036	-0.164641241002618	0.812361939456285	-0.20266981133165	0.839393120533113	0.925787403501475
ANGPTL4	408.465055446627	-0.732167239431818	0.106636376947275	-6.86601758604221	6.60189388848586e-12	3.50197470209766e-11
ANGPTL5	2.04572480934184	-0.642289902923763	0.147902339018789	-4.3426622404002	1.40766461416397e-05	3.63789916368882e-05
ANGPTL6	14.9331317257517	-0.793061536938762	0.102663998166228	-7.72482614260431	1.12006109679059e-14	7.98855169939227e-14
ANGPTL7	1.85725225310329	-1.49724571545768	0.245605791428637	-6.09613359175497	1.0866461267097e-09	4.54153482044169e-09
ANK1	334.936380864638	0.913197232206143	0.105190076683702	8.68140095526357	3.90923396942989e-18	3.9261872800116e-17
ANK2	6392.327172736	-0.00574213543993645	0.0630578991213655	-0.0910613185650975	0.927443868212856	0.999437923346475
ANK3	1174.78024852201	0.414026017402783	0.114666920743278	3.61068401173627	0.000305390544955791	0.000661270803811984
ANKAR	23.5523913455445	0.334884626159837	0.0625943222714781	5.3500799115199	8.79154025663879e-08	2.97714553504102e-07
ANKDD1A	239.491559420508	-0.0558203679528125	0.0617925836569972	-0.903350606970316	0.366339845637413	0.460204203023131
ANKFN1	96.6805762619377	0.340624733387751	0.0845302056196727	4.02962149317755	5.58667360576338e-05	0.000133554452357036
ANKFY1	4179.01487129804	0.056860558836235	0.0361043886453127	1.57489327391276	0.115281081464484	0.163718929992668
ANKH	1962.63597873723	-0.0222670192694901	0.0511434527489915	-0.435383574487532	0.663284030889931	0.767332338790409
ANKHD1	1717.36711938671	0.226856104191277	0.0323006404589696	7.02326953793514	2.16735516863769e-12	1.21102431151385e-11
ANKHD1-EIF4EBP3	371.202084803584	-0.185335021806018	0.0572477877568444	-3.2374180569774	0.00120616573502658	0.00240756159947254
ANKIB1	2782.75957731655	-0.0196538169674685	0.0434623821019128	-0.452202940036357	0.651122790367817	0.75569554438951
ANKK1	2.09470398325494	-1.78484445367485	0.22941038285455	-7.78013807163417	7.24454378245659e-15	5.24490049127098e-14
ANKLE1	28.9557037189037	0.1401400652821	0.0763384123094906	1.83577390519919	0.0663911023310106	0.0990157473585836
ANKLE2	1169.53120435663	0.00184563425852208	0.0209275692384133	0.0881915256137032	0.929724452654075	0.999988810474289
ANKMY1	178.701118117771	0.154893703375523	0.0397061268208948	3.90100258517313	9.57951277946374e-05	0.000222216249191308
ANKMY2	662.668497422911	-0.0692422671999963	0.0376148886298091	-1.84082074205912	0.0656478321535668	0.0979740391162216
ANKRA2	340.740464780311	0.244836766116293	0.0290852103227461	8.41791286359784	3.83250660699017e-17	3.5008302811416e-16
ANKRD1	2.16696545174126	-1.11460993962761	0.271631240820165	-4.10339376377382	4.07133446765705e-05	9.8845854706252e-05
ANKRD10	1758.91314920007	-0.157790432689028	0.0614472667184325	-2.56789994276011	0.0102316684467656	0.0176644793347291
ANKRD11	2699.21450852816	0.0961602102894727	0.0260433168478606	3.69231810415009	0.000222219269626288	0.000489578771415051
ANKRD12	1194.27071538043	0.210414651736724	0.0375702901059193	5.60055967477272	2.13660837231785e-08	7.75426545152596e-08
ANKRD13A	1037.67239638774	0.0138248041106051	0.0320877378193403	0.430843837868572	0.666581921995961	0.770593442241632
ANKRD13B	838.573973154359	0.418209822967252	0.050478648745507	8.28488545871537	1.1822281003107e-16	1.02837649821547e-15
ANKRD13C	628.202222991858	-0.0840890634512244	0.0296179920567923	-2.83912100759512	0.00452379980523811	0.00826459389012643
ANKRD13D	632.864885654536	0.0328249108164594	0.0413842325993325	0.793174326421817	0.427676263309766	0.527891098774313
ANKRD16	222.473216379374	0.432427413087679	0.0417169813637145	10.3657407355894	3.54997193018591e-25	7.12346559079608e-24
ANKRD17	2266.1176951147	0.105048681059316	0.0416108363723922	2.52455105970936	0.0115846174739941	0.0198147334541079
ANKRD19	70.1825210506795	0.493664028264518	0.0766745267715887	6.43843593238117	1.20710892269753e-10	5.60158867121662e-10
ANKRD2	7.93643788010404	0.0164097723854371	0.173598857195005	0.0945269608947013	0.924690566630389	0.997563095529085
ANKRD20A3	62.6974909731745	0.311461077259252	0.108107281637852	2.88103698974333	0.00396369120346496	0.00730847333647507
ANKRD20A4	6.14316377013273	0.737679228822138	0.158600122397277	4.65118953044897	3.30025840643054e-06	9.27417369458745e-06
ANKRD20B	23.126500502917	0.29867919614811	0.094805928354076	3.15042741876457	0.00163031759604272	0.00319267826085366
ANKRD22	130.407659832776	-1.10160431999745	0.151665308595802	-7.26339022546875	3.77506822240884e-13	2.29926416949623e-12
ANKRD23	60.6150001181748	0.439196689276858	0.0529593174657916	8.29309572504501	1.10338473689974e-16	9.63625933712127e-16
ANKRD24	277.168252376358	0.467360720415419	0.0893937316483551	5.22811512393127	1.71246873312147e-07	5.60151994208976e-07
ANKRD26	291.294037859828	0.466833922589351	0.0478190872437699	9.7625017434889	1.63081736990638e-22	2.53175393742957e-21
ANKRD26P1	0.414502939905907	-0.79415336973065	0.292384113883797	-2.71613036420397	0.00660499044121417	0.0117822028558831
ANKRD27	549.949858800462	-0.204747098642366	0.0367440942974172	-5.57224507930675	2.51477310070257e-08	9.05658772179474e-08
ANKRD28	1438.97220136311	0.332575471078539	0.0410020950129722	8.11118239137096	5.01295424097742e-16	4.11681285914228e-15
ANKRD29	51.5297246318303	0.258111318407652	0.116535727487451	2.214868555529	0.0267690879669865	0.0430092635186198
ANKRD30A	0.0018712092977023	-0.000130844374231799	2.89081430390498	-4.52621166482576e-05	0.999963886055949	0.999988810474289
ANKRD30B	1.5252095999733	0.910241025931501	0.283860488528193	3.20664926158293	0.00134290617609258	0.00266341189558296
ANKRD31	0.985881115285786	0.652940681681379	0.191140191405309	3.41603028060609	0.000635411809055681	0.00132164850605041
ANKRD32	115.921232700537	-0.369390408854471	0.055218905605905	-6.6895641049244	2.23836317261862e-11	1.12288937443929e-10
ANKRD33	0.276445695313616	0.0732513162808871	0.357999813076072	0.204612722144974	0.837874714865267	0.924475296346774
ANKRD34A	141.537600928328	0.316537158611295	0.123518386554246	2.56267238782527	0.0103870008545351	0.0179122305581711
ANKRD34B	2.45717413154759	-0.213630255359612	0.225331832955683	-0.948069576133201	0.343094035311631	0.434915711578946
ANKRD34C	14.5071550252833	0.579521695304128	0.228024107231186	2.54149310062453	0.0110380124677553	0.0189419645565132
ANKRD35	214.481488445799	-0.562950376409373	0.127486708876023	-4.4157573865745	1.00656930032889e-05	2.65180897711111e-05
ANKRD36	228.51089067388	0.416777562503757	0.061631129073949	6.76245216931984	1.3567547811126e-11	6.97356165466027e-11
ANKRD36B	33.8998586747808	0.569854458611109	0.0848210795647122	6.71831178682833	1.8384200102427e-11	9.33917365203292e-11
ANKRD36BP1	85.8238892542592	-0.147237293523553	0.0910659513998919	-1.61682046099754	0.105917041412813	0.151623660840027
ANKRD37	89.1535889372673	-0.0153098627820571	0.0632575880130118	-0.242024131222138	0.808761464973669	0.899359927579181
ANKRD39	165.5183496041	0.115942098689592	0.0511571704699362	2.26638998256809	0.0234275163878507	0.0380849500449947
ANKRD40	2702.69776440459	-0.151699354794576	0.0373495202708093	-4.06161454537175	4.87344959744226e-05	0.000117192591406854
ANKRD42	236.811437999794	-0.244671639672713	0.0439415940804325	-5.56811023343522	2.57516900381822e-08	9.26312154496591e-08
ANKRD43	302.998192757705	0.290397471652055	0.143337079425298	2.02597592204604	0.0427672521098276	0.0662006257593738
ANKRD44	164.668108707264	0.268146667253834	0.0734519103717834	3.65064252102615	0.000261585108516585	0.000571319523038831
ANKRD45	68.5007160670164	-1.19646840078271	0.11661827016498	-10.2596994372329	1.07039380938176e-24	2.03385155769112e-23
ANKRD46	1410.28160041868	0.229881177686576	0.0444293173608798	5.17408754717864	2.29027426002189e-07	7.3871946269918e-07
ANKRD49	176.900002858568	-0.0830934312764142	0.0279037311686555	-2.9778609453403	0.00290267643124681	0.00546524969383965
ANKRD5	17.6846194325598	-1.03557158438053	0.122132996232436	-8.47904838435057	2.27043252650533e-17	2.12522416948442e-16
ANKRD50	605.120087954544	0.236387901063903	0.0525438037740051	4.49887301803702	6.83146452572296e-06	1.83862974007187e-05
ANKRD52	1385.57304542623	0.11463984793237	0.035691389809625	3.21197489209162	0.00131825895836474	0.00261776733535861
ANKRD53	15.7188779572748	-1.53664759647469	0.12571520944903	-12.2232433387283	2.33576389084642e-34	1.30995761228809e-32
ANKRD54	515.005491474558	-0.0506509854132526	0.0341335299767166	-1.48390703943609	0.137833584104967	0.192470320146576
ANKRD55	31.9896880968381	1.2641228070752	0.161101314113424	7.84675664523254	4.2693455436282e-15	3.16423445129221e-14
ANKRD56	31.3113565251201	0.589832804257604	0.214437905821328	2.75059953602167	0.00594863161796242	0.0106920026844038
ANKRD57	318.687398060927	-0.247357592793138	0.0520237191608432	-4.75470798287941	1.98733459131422e-06	5.73785295248173e-06
ANKRD58	18.6054728769942	-0.878076957069601	0.102314365609882	-8.58214730488239	9.31182880032801e-18	8.9898651267512e-17
ANKRD6	814.906394545954	0.233045843405694	0.0488235784721223	4.77322332157117	1.81300560880435e-06	5.25766284757125e-06
ANKRD7	4.00946827663172	-0.293079192574716	0.130521814627691	-2.24544221523977	0.0247397579039223	0.040056105801835
ANKRD9	73.4530669807025	-0.1033337778619	0.0932356468618584	-1.10830761988495	0.267728985769313	0.3492078640915
ANKS1A	1112.28851991709	0.0893065058764087	0.0323921618442644	2.75704061697944	0.00583271058874927	0.0105028272904802
ANKS1B	889.871382080144	0.200277748726268	0.0956778906483075	2.09325004313116	0.0363268396268066	0.0569387561154302
ANKS3	459.943918903508	0.0992456388102036	0.0552153207490557	1.79742936315191	0.072267482689006	0.106993486517229
ANKS4B	0.161616391724489	0.205477453399654	0.566668782650795	0.362605916702275	0.716899289793912	0.817196277699529
ANKS6	582.045499260433	0.192454238564039	0.0472572741010895	4.07247862312908	4.65154705064357e-05	0.000112144156389368
ANKZF1	687.892508752794	0.29585836354988	0.0520744618448947	5.68144831589624	1.33558876454825e-08	4.95216892637639e-08
ANLN	1707.35988509895	-0.514512092485517	0.115140419900891	-4.46856189102308	7.87472291093375e-06	2.10245382478951e-05
ANO1	34.7431045124323	-0.39911858305062	0.104161996684263	-3.83171017986948	0.000127255594293702	0.000289866509334822
ANO10	513.235995451934	-0.157041297076677	0.0372025487567484	-4.22125102512474	2.42950198719977e-05	6.07452643439953e-05
ANO2	17.5926003008881	-0.0900437402780786	0.0905850985903179	-0.99402375975007	0.320211300270477	0.409282478139363
ANO3	122.681541056888	0.361287129715403	0.160187170876386	2.25540614606524	0.0241078473233027	0.0391134076122323
ANO4	128.542567377114	0.382615493857779	0.115157844182589	3.32253088422811	0.000892047957232414	0.00181404587170662
ANO5	295.812080197008	0.515597098385002	0.104164248316279	4.94984706095577	7.42718224170324e-07	2.25519176967343e-06
ANO6	1386.76631781615	-0.663394244238064	0.0679619023041008	-9.76126655886787	1.65080504916427e-22	2.56076417594946e-21
ANO7	15.7616253666885	-0.680064637978348	0.0976268864992473	-6.96595643233579	3.26180083375002e-12	1.78853898084594e-11
ANO8	1154.12226207295	0.593268685982696	0.0579958370338172	10.2295046735296	1.4626555978514e-24	2.74474503753144e-23
ANO9	1.43012987876017	-2.25463695262517	0.290482577899562	-7.7616942431733	8.38022448444584e-15	6.02941224328641e-14
ANP32A	2681.5261100583	-0.050031737538385	0.0298123588558188	-1.67822136384286	0.0933038926150421	0.135130012222418
ANP32B	2297.23243736262	-0.11714791139805	0.0446415495602444	-2.62419007745144	0.00868552985266847	0.0151748162909185
ANP32C	2.16447187525823	0.108348860013858	0.116117857034377	0.933093864983928	0.350771506459144	0.443505498403767
ANP32D	0.0568467718335142	-0.120717207051639	0.902321285084978	-0.133785170589509	0.893572453925698	0.973542935329166
ANP32E	1682.32017544921	-0.223713483149672	0.0366496490428226	-6.10410983440191	1.03375183263423e-09	4.33058200157584e-09
ANPEP	58.3023975356303	-0.480011521794087	0.096496399834449	-4.97439824301843	6.54506331103831e-07	1.99937261449083e-06
ANTXR1	4877.91378339329	-0.0351988681202844	0.0498921398809438	-0.705499267104568	0.480499587879451	0.584010520338787
ANTXR2	294.985670440324	-0.755075365055894	0.076231665347778	-9.90500944208879	3.95932654609746e-23	6.46799527468287e-22
ANTXRL	0.323408907559432	-0.73450318547117	0.296997627196519	-2.47309445669463	0.0133948734413479	0.0227054235505842
ANUBL1	86.1724625441109	-0.292047428144018	0.0823160251322062	-3.5478805940273	0.000388344233570716	0.00082939744361935
ANXA1	1566.80339062112	-2.81660828316224	0.134135698214961	-20.9982004838746	6.81171546764526e-98	4.46962063268657e-94
ANXA10	0.024567818593848	-0.0876442220964854	2.16157487861183	-0.0405464658956302	0.967657463050285	0.999988810474289
ANXA11	1038.35703254566	-0.470474801278723	0.0713064799216922	-6.59792492625343	4.16952292991287e-11	2.04019534862876e-10
ANXA13	4.60960284244816	-1.36406270152126	0.178947844827551	-7.62268303837796	2.48456441535452e-14	1.71009267539348e-13
ANXA2	1327.63293591565	-1.65643919952681	0.104280206946664	-15.8845024192753	8.11392491271053e-57	4.20322662912386e-54
ANXA2P1	8.00683343454358	-1.44380274325418	0.115734275600855	-12.4751525488747	1.02010650848505e-35	6.64927040381727e-34
ANXA2P2	452.450277788647	-1.86324344675022	0.114388571113461	-16.2887203556559	1.18686660217201e-59	8.65313669028001e-57
ANXA2P3	0.891741098375899	-1.72209238625037	0.243479992685476	-7.07282913580066	1.51806365102673e-12	8.64172439862959e-12
ANXA3	53.3978993731163	0.207016639376569	0.137133552948123	1.50959874462585	0.131145841888306	0.184150502715693
ANXA4	421.698109994071	-0.510422344711024	0.0528312736447219	-9.66136739658211	4.39951830502256e-22	6.54112672465024e-21
ANXA5	5299.45774117222	-0.894263424686262	0.0656039818548326	-13.6312369981608	2.61116436944335e-42	3.40402454387367e-40
ANXA6	4572.51219814709	0.0289642150260597	0.0432947428074279	0.66900074114981	0.503495005182614	0.607458885573655
ANXA7	2065.249233763	-0.0542851355203751	0.035533439831504	-1.52771968539465	0.126582150402134	0.178289183648111
ANXA8	2.67133769232878	-0.0146591881692706	0.217390912989255	-0.0674323869737609	0.946237486780588	0.999988810474289
ANXA8L1	0	NA	NA	NA	NA	NA
ANXA8L2	1.49424203970304	-0.386307329497329	0.247537786573808	-1.56059943350162	0.118618292527077	0.168046138063728
ANXA9	48.0915503710673	0.274502796780088	0.0493851198178971	5.55841107184292	2.72241603889824e-08	9.75264053243164e-08
AOAH	191.063338168441	-0.697079254800845	0.0893029669715676	-7.80577934239052	5.91349664002737e-15	4.32258378607274e-14
AOC2	22.5934001836507	0.215339237168049	0.0807292932695751	2.66742378691435	0.0076435222816748	0.0134811160393126
AOC3	56.10651374137	-0.163902827650929	0.100373109869987	-1.63293563249393	0.102482535008416	0.147231696222498
AOX1	21.986756307572	-1.79499055045206	0.159718009212735	-11.2384981461999	2.63832523411585e-29	8.11491128649541e-28
AOX2P	0	NA	NA	NA	NA	NA
AP1AR	391.337922403481	0.0621544035310375	0.0374315184482644	1.6604830930635	0.0968173063411319	0.139765963282868
AP1B1	4120.47913762473	-0.105872203849223	0.0310846398022876	-3.40593310788282	0.000659383330031331	0.0013674983789476
AP1G1	2111.57165020573	0.028119013882092	0.0236911822858876	1.1868978737647	0.235267906120359	0.311386319638222
AP1G2	343.165839169481	0.216870445437378	0.0643379903835191	3.37079918326034	0.000749504717674168	0.00154298267803974
AP1M1	1699.31352142512	-0.166519206844381	0.0251076055733295	-6.63222171298028	3.30671379211858e-11	1.63467255142778e-10
AP1M2	0.835408719398057	-0.752626366598441	0.261726717935892	-2.87561916694646	0.00403235901887733	0.0074260442779119
AP1S1	1220.84567153224	0.0706290425885584	0.0498941719260271	1.41557700753653	0.156899387078507	0.216301171975657
AP1S2	927.0786918904	-0.461803796720991	0.0506425531270483	-9.11888852764693	7.58987027235043e-20	9.02758890097996e-19
AP1S3	22.3563568263898	-0.618282151607673	0.0853725233925847	-7.24216793691933	4.41568588200914e-13	2.67125926820375e-12
AP2A1	2854.28449235334	-0.00950858215440207	0.0390416872372758	-0.243549467947266	0.807579768577275	0.898299584361397
AP2A2	2534.931469683	0.115096765939302	0.0345503152232267	3.33127976389424	0.000864476745558133	0.00176234721792791
AP2B1	11542.6720967307	0.239671083178436	0.0315333256548325	7.60056474226358	2.94841212171202e-14	2.01456066004516e-13
AP2M1	8309.62709403288	-0.0347703976196978	0.0340472091290065	-1.02124075685473	0.307140386909898	0.394265309183003
AP2S1	941.163443033027	-0.357148163059394	0.051069761719192	-6.99333913134704	2.68419608453406e-12	1.48131202478422e-11
AP3B1	856.04277016927	-0.151992634838716	0.0326200404242561	-4.6594864035084	3.16999333206276e-06	8.93361757217688e-06
AP3B2	1079.35850215493	0.617543163265107	0.0754690225330533	8.18273700304837	2.77468300891333e-16	2.33018920778409e-15
AP3D1	3880.67597088733	0.150655241852606	0.0240681971589643	6.25951502962878	3.86176517292669e-10	1.69118681710928e-09
AP3M1	1325.62102493892	0.127320791991254	0.0325969014477148	3.90591701470387	9.38687244194097e-05	0.000217978747221432
AP3M2	977.104769820329	0.0727371062579915	0.0459043192375709	1.58453730424694	0.113071499477971	0.160871094768999
AP3S1	616.111600831424	-0.191235448152163	0.0323759813972052	-5.90670737686646	3.49012881782434e-09	1.38124619579558e-08
AP3S2	2072.77196225549	0.138515803213873	0.0245813305086479	5.63500023585551	1.75058097581417e-08	6.41239049291066e-08
AP4B1	353.419525923663	-0.173768647961849	0.0378705008004866	-4.58849617218731	4.46450492529412e-06	1.23328346133055e-05
AP4E1	253.602552026885	0.0106508040342566	0.0281690350215875	0.378103262184676	0.705353885027535	0.806417192866014
AP4M1	366.844948151147	-0.171431798939926	0.0396160868375379	-4.32732792723707	1.50929171532296e-05	3.88625342264649e-05
AP4S1	135.33055277777	0.117188960608805	0.0436740349066978	2.68326388571972	0.00729074370419607	0.0129028400446911
APAF1	529.574151108193	0.141210703866975	0.0381215267820089	3.70422477238288	0.000212038184568277	0.000468548485966018
APBA1	1085.5334527036	0.356553800056819	0.0710784509239988	5.0163417382023	5.26646194434071e-07	1.62620083724466e-06
APBA2	3736.43501419371	0.198683346081976	0.0404695916726635	4.90944775744261	9.13332263329485e-07	2.74781378628166e-06
APBA3	253.812042953378	0.000450378818118084	0.0438768467878055	0.0102646122292283	0.99181016819646	0.999988810474289
APBB1	4575.43098673001	0.266802297329812	0.0509910076511276	5.23234016388206	1.67377367038428e-07	5.48403487091307e-07
APBB1IP	610.512490466964	-0.901176920933969	0.0961209324427285	-9.37544921831584	6.88818176222489e-21	9.02154743775096e-20
APBB2	2363.95726017776	0.2650863541512	0.0470334445999721	5.63612460039462	1.73919562913905e-08	6.3742442672877e-08
APBB3	537.10267292606	0.279197013647238	0.0574849838975575	4.85686860667454	1.19256671353026e-06	3.54082590585871e-06
APC	4113.99645927815	0.160535709827474	0.0488252798397115	3.28796292319258	0.00100915128785445	0.0020389144104911
APC2	9430.99484124736	0.532678791497944	0.0492853057223488	10.8080650751933	3.15249283400987e-27	7.80588948899175e-26
APCDD1	2640.29558324447	0.111718979221334	0.0609643275872516	1.8325303278617	0.0668724475899294	0.0996732135085757
APCDD1L	3.82854332834375	-3.25541423602466	0.380150032141663	-8.56349851579529	1.09493279563196e-17	1.05242930087965e-16
APCS	0.0349625182560495	-0.15322443014601	2.89081430390498	-0.0530038992608522	0.957728800921916	0.999988810474289
APEH	1556.11448412339	0.105102169502713	0.0307490628930753	3.4180608972764	0.000630689938583642	0.00131196570231628
APEX1	3209.10681692614	0.109758030007747	0.0337202241766881	3.25496145673985	0.00113407755733144	0.00227173264638948
APEX2	326.754927087541	-0.248587124287556	0.0273569239898126	-9.08680831149463	1.01988982693177e-19	1.19361065654886e-18
APH1A	3489.48440510281	-0.13839508160867	0.0250185112708341	-5.53170730706136	3.17128765829659e-08	1.12683750096694e-07
APH1B	881.155081555063	0.096023062873543	0.0341609983208218	2.81089744426512	0.00494035302916606	0.00898391218282993
API5	1923.11514543786	0.0603522553877632	0.0245656651948067	2.45677269103716	0.0140191359950682	0.0236779658569643
APIP	314.086908711654	-0.193496024362245	0.0338895570929977	-5.70960617252284	1.13237897847834e-08	4.23217774660073e-08
APITD1	150.309683186307	-0.522777125786304	0.0499831941451784	-10.4590579839271	1.33173051847041e-25	2.80076017693269e-24
APLF	27.8441903124673	-0.23172388109388	0.0611679508128619	-3.78832179294054	0.000151668324374994	0.000341992092247623
APLN	1302.17057073426	-0.744526508250819	0.0885638601895264	-8.40666279289921	4.21841664243465e-17	3.83909068915054e-16
APLNR	3744.83169022294	-0.760866357189874	0.139008692338648	-5.47351639950887	4.4119203312335e-08	1.54452519509748e-07
APLP1	7408.5948727055	-0.294892284011303	0.0849883240613038	-3.46979761359444	0.000520850671522598	0.00109376418486477
APLP2	11870.8663035555	-0.0552818163119043	0.037259567844657	-1.48369451149798	0.137889983009332	0.192535417473308
APOA1	3.34094252291528	0.0581318763100653	0.144549928976578	0.402157764598312	0.687567923130475	0.790397954147594
APOA1BP	1560.49220199022	-0.19767165496418	0.0436170958019118	-4.53197654107718	5.843434044133e-06	1.58922353079246e-05
APOA2	0.325469698202508	-1.4686806578977	1.23277074580549	-1.19136559891196	0.233510091732965	0.309371796726573
APOA4	0.0549856623107373	0.0429323796546963	2.06824109982896	0.0207579182418562	0.983438766877141	0.999988810474289
APOA5	0.138973589809634	0.0638476403094805	0.514218399561168	0.124164441342371	0.901185076021354	0.979776219014711
APOB	6.63616345889592	-1.62718126884711	0.179891990460367	-9.04532361159013	1.4922250764032e-19	1.71179782220263e-18
APOB48R	155.522566933107	-0.954443678028395	0.0867792805260834	-10.9985202947323	3.8845367795757e-28	1.06204314591594e-26
APOBEC1	0	NA	NA	NA	NA	NA
APOBEC2	2.29846470798816	0.153738380557807	0.082481295244708	1.86391811745549	0.0623332040586785	0.0935235611200523
APOBEC3A	2.76432895515268	-0.38813424282073	0.177173784376285	-2.19069793077515	0.0284736589400923	0.045527154000863
APOBEC3B	25.084159000762	-0.78651593439961	0.120238629563799	-6.5412915737058	6.09897899824916e-11	2.92825369708621e-10
APOBEC3C	91.5531461325822	-1.22812350580539	0.0922951002576562	-13.3064865022834	2.1222972510139e-40	2.27051203185917e-38
APOBEC3D	11.2235724470606	-1.1460250851996	0.108433001454997	-10.5689695002608	4.15029886416296e-26	9.26215189095398e-25
APOBEC3F	36.8640283729394	-1.18229679016076	0.0897780361474461	-13.1691095160405	1.32147076972561e-39	1.29418667174371e-37
APOBEC3G	89.9326420467942	-1.32277647908775	0.0898070656219639	-14.7290914130952	4.19305354881739e-49	1.08605604090093e-46
APOBEC3H	2.24362962416004	-1.54157924025412	0.162915080249313	-9.46247111007158	3.00750184057304e-21	4.10274939235484e-20
APOBEC4	0.164355346469164	-0.809192867352382	1.18428710588564	-0.683274235893369	0.494433571138613	0.598139432636652
APOC1	2161.31973592319	-0.648453867608018	0.0922131366451122	-7.03212027266388	2.03418332768386e-12	1.14017365619182e-11
APOC1P1	1.75626420212325	-0.573794688536866	0.188084575315082	-3.05072698053861	0.00228288055325084	0.00437613240731745
APOC2	612.580405709831	-1.29821010878302	0.111928907670627	-11.5985238827065	4.19247130983824e-31	1.59015024535965e-29
APOC3	0.149313096100636	-0.569033786496746	2.14429554096521	-0.26537096945163	0.790723697702125	0.883293382661805
APOC4	2.86208340031333	-0.722654492538831	0.141971665237344	-5.09013183250839	3.57814660606834e-07	1.12914100577838e-06
APOD	5700.26047145532	-0.536832106020477	0.106426942784638	-5.04413724546043	4.55572226838265e-07	1.41651228641782e-06
APOE	56376.1674124973	0.129077069802981	0.0884037625657173	1.46008570287977	0.144266521419077	0.200556465809234
APOF	0.16593744056748	-0.0564594541604564	0.585283743284983	-0.0964650988656718	0.92315119169212	0.996175375970803
APOH	1.69742211296552	-1.84051417819281	0.391869365309506	-4.69675443177125	2.64327920869064e-06	7.50619607949729e-06
APOL1	281.590499299672	-1.35735815023902	0.0994783284426815	-13.6447623466162	2.16919513010206e-42	2.90480313850742e-40
APOL2	1252.49641178926	-0.554597671814945	0.0714437529197849	-7.76271751062171	8.31286333204711e-15	5.98473264047811e-14
APOL3	260.214202355428	-0.479724720904669	0.0657260723078761	-7.298849665891	2.902383834519e-13	1.78709495722573e-12
APOL4	247.461643025735	-1.71916201848361	0.155154662332432	-11.0803116879605	1.56327401388285e-28	4.53211324937908e-27
APOL5	0.15107532430263	0.0528356944559792	0.475234415283899	0.111178173879549	0.911475059041101	0.98790807935382
APOL6	674.617321604894	-0.654312568166365	0.0801653905107601	-8.16203306685746	3.29431980451281e-16	2.7501562914264e-15
APOLD1	2012.68959535639	0.149871450424508	0.0852040358888103	1.75897126070516	0.0785823900936094	0.115422649529376
APOM	89.619533440724	-0.00240514128475973	0.0556622466830914	-0.0432095617421484	0.965534483040899	0.999988810474289
APOO	411.192722739065	-0.175463711161919	0.039712664146928	-4.41833140463057	9.94658247836465e-06	2.62218395723327e-05
APOOL	148.77266309486	0.297157897408321	0.0748037951144067	3.97249761130222	7.11229496664705e-05	0.000168053686734422
APP	31044.4516928151	0.0480661947050627	0.0421054184037996	1.14156791518132	0.253633666940846	0.33260800304647
APPBP2	1565.11726680501	0.0725238773681725	0.0287231986485374	2.52492343403632	0.0115723499039444	0.0197967939392671
APPL1	1597.38684931726	0.207303390489222	0.0322840231310416	6.42123782552664	1.35170654544948e-10	6.23730505090788e-10
APPL2	1962.83927223992	0.127782797080133	0.0383623266142888	3.33094492325546	0.000865517253172975	0.00176392039845843
APRT	714.506155084657	-0.160461599492225	0.0475481833746375	-3.37471566953316	0.000738919916489139	0.00152294404314613
APTX	477.682604209238	0.0690529205628273	0.0276787461499285	2.49479944607265	0.0126028338842152	0.0214496615087996
AQP1	12493.2545543515	-1.71998444611125	0.1512130625398	-11.3745758284509	5.59743221796338e-30	1.88673721251043e-28
AQP10	0.0588107757691034	-0.197100365193392	1.12956068250669	-0.174492940703276	0.861478078167957	0.945958385046926
AQP11	78.7759548704066	0.198212506868792	0.0419032194640429	4.7302452986668	2.24248711931565e-06	6.42272063781879e-06
AQP12A	0.0328500080927403	0.0213639675869341	1.63784305433587	0.013043965067579	0.98959271678634	0.999988810474289
AQP12B	0.819036067151425	0.454589734542811	0.318133753128627	1.42892645018717	0.153025374210193	0.211538236750537
AQP2	0.25677006041556	-1.21305709977821	0.577736985250777	-2.09967014531995	0.0357578675671385	0.0561273919989731
AQP3	40.0751760003487	-0.717024628931372	0.144178526350479	-4.97317212958869	6.58661281566785e-07	2.0114407892712e-06
AQP4	26316.8047271647	-0.374975642431227	0.109476324344655	-3.42517566858314	0.000614402018049158	0.00127997711136604
AQP5	27.3035704344192	-2.24992098470524	0.286737111913584	-7.84663334888896	4.27354312866319e-15	3.1661534244537e-14
AQP6	127.43474334726	0.252560131752282	0.0985320566197911	2.56322805406208	0.0103703906103937	0.0178867203334444
AQP7	2.26906378433564	0.224829472562255	0.132857800958864	1.69225646472854	0.090597084703245	0.131558248184079
AQP7P1	26.8223480133183	-0.431023616786189	0.205484501829012	-2.09759671872895	0.0359407852062044	0.0563695607349322
AQP7P3	3.40997651433985	-0.43975118952567	0.253742700598424	-1.73305946728149	0.0830850996481198	0.121465294212643
AQP8	1.26894165285699	-0.379131148651049	0.181314592315381	-2.09101288434405	0.0365269090179212	0.0572204523331035
AQP9	20.6514469548855	-0.6401809091172	0.1718187131624	-3.72590911277582	0.00019461252364356	0.000432240497339893
AQPEP	4.34260384165182	0.247576282897808	0.107966187146237	2.29309091523694	0.0218427713102294	0.0357151717951546
AQR	722.95105307878	0.0474845123611688	0.0418092094438697	1.13574288997065	0.256064184765313	0.335437777141491
AR	78.5141613730556	-0.526794821012853	0.135766247568591	-3.88016042607872	0.000104387590305606	0.000240983899984267
ARAF	772.707039595129	-0.0324941928068961	0.0357549822901537	-0.908801815176522	0.363454748270151	0.457104952702398
ARAP1	2472.05751674267	-0.0887904810301656	0.0338300967658581	-2.62460026776437	0.00867507459573758	0.0151578948532837
ARAP2	1417.89298889563	-0.198718035691663	0.0746487695000265	-2.66204033934668	0.00776685698069518	0.0136814836389248
ARAP3	307.916509946934	-0.887184651694148	0.0921309185144543	-9.62960823575159	5.99576298841266e-22	8.80795480797785e-21
ARC	1143.31359561741	-0.510123903172484	0.138168635210998	-3.69203837320584	0.000222463888681122	0.000490062852359881
ARCN1	2711.57179235634	-0.0736618108970869	0.0277147722622056	-2.65785373230503	0.00786400151143637	0.0138426960343937
AREG	2.90047975543638	-0.859908506598863	0.328305157780645	-2.61923544671633	0.00881270988649018	0.0153808967285468
ARF1	6374.92134107086	-0.10794383522342	0.0245097525045273	-4.40411771614101	1.06215259900003e-05	2.78891208634328e-05
ARF3	8406.72862560029	0.21804485998754	0.0409389928556395	5.32609243115523	1.00348080845194e-07	3.3743627800438e-07
ARF4	2645.56743999276	-0.266786103614244	0.0308300831542334	-8.6534344484118	4.99723509334213e-18	4.9606945442481e-17
ARF5	2503.61665328096	-0.145818007955767	0.0384171023664656	-3.79565347133135	0.000147255066093898	0.000332650444808168
ARF6	1141.96034409616	-0.178700311276937	0.0258805833914861	-6.90480228261483	5.02733979058544e-12	2.69920886512115e-11
ARFGAP1	2288.81109240665	0.162377849157663	0.0444313631703407	3.65457725289993	0.000257606090197891	0.000563191457746055
ARFGAP2	2895.68437814712	0.248703487307026	0.0331907439918766	7.49315795294905	6.723590398195e-14	4.42803201701133e-13
ARFGAP3	908.088198466933	-0.0798347489620436	0.0261979165898583	-3.04737014824106	0.00230853243697454	0.00442014016358758
ARFGEF1	1070.60277837632	0.123371511400409	0.0310361614343336	3.97508924102739	7.03528706232593e-05	0.000166274013473269
ARFGEF2	1040.46989821584	0.124991737766814	0.0452566337240969	2.76184345766447	0.00574760287648675	0.010360948958209
ARFIP1	594.392977396113	-0.254722744718306	0.0283589140868782	-8.98210502482418	2.65635095585068e-19	2.98460437020095e-18
ARFIP2	1037.7493966112	0.10683998473645	0.0320400464407503	3.33457646305295	0.000854294095350229	0.00174249085762815
ARFRP1	828.885648299346	-0.021085499345563	0.0423633231634491	-0.497730059188451	0.618674318359966	0.724916902197377
ARG1	1.37770160635035	-0.663059707213583	0.226632879955737	-2.92569951607676	0.00343682718152676	0.00640177356816373
ARG2	180.001222618513	-0.0421528193026994	0.0569606100702467	-0.740034547570934	0.459279031871939	0.561756414962043
ARGFX	0.0156299285020477	-0.0330013514101561	2.89081430390498	-0.0114159361137715	0.990891598668078	0.999988810474289
ARGFXP2	0.422245326410681	0.63641829536375	0.221799102614634	2.86934567300526	0.00411322001938716	0.00756217508753013
ARGLU1	2384.8625321486	0.328110950302812	0.0579988068835413	5.65720172419481	1.53860887633922e-08	5.67394449807747e-08
ARHGAP1	2798.55778402625	-0.0351479690312183	0.0334973080032006	-1.04927742336369	0.294050453709312	0.379391963116458
ARHGAP10	164.885535462942	0.128121660197264	0.0648511418056848	1.97562689923268	0.0481970497470956	0.0738046615536038
ARHGAP11A	164.858501427952	-0.687434135283722	0.107881257155114	-6.37213686057917	1.86412417796462e-10	8.46098327028671e-10
ARHGAP11B	11.6390665785275	-0.633075997243189	0.133620101683232	-4.73787992426466	2.15965708735778e-06	6.20172863087352e-06
ARHGAP12	1677.40803231919	0.214882386810727	0.0470562162676231	4.56650372372961	4.95926232372635e-06	1.36345082182337e-05
ARHGAP15	45.5729018991981	-1.2077644566558	0.106287969497678	-11.3631341567983	6.38133975562081e-30	2.125493622494e-28
ARHGAP17	837.470128057292	-0.150021464075271	0.0306089898983435	-4.90122230669854	9.52422058009522e-07	2.86017211470899e-06
ARHGAP18	219.670211184961	-1.01669637711884	0.0813135009956393	-12.5034141276658	7.15127404221882e-36	4.85423550072681e-34
ARHGAP19	509.58897097861	0.0737174430670216	0.0372036411684736	1.98145774853591	0.04753996312192	0.0728778268090488
ARHGAP20	166.764004039701	0.0301876968100345	0.102144651521001	0.295538693025233	0.767582398839356	0.86371667549747
ARHGAP21	5381.48306353572	0.0522484508159222	0.0439318242070826	1.18930756368407	0.234318660043842	0.310275987014868
ARHGAP22	412.263231595635	-0.245388618943382	0.0736656359625097	-3.33111383261887	0.000864992227144271	0.00176314619299588
ARHGAP23	2037.75624874246	-0.25635746303194	0.0628998444795902	-4.07564541936385	4.58868954314715e-05	0.000110655829544104
ARHGAP24	458.26158569975	0.0949477468053051	0.0668320564613167	1.42069168349267	0.155406411316201	0.214408130555047
ARHGAP25	226.667173645921	-0.814951422577024	0.0715915893749582	-11.3833402735166	5.06228993352997e-30	1.71221954195082e-28
ARHGAP26	935.383715185164	0.0895690406130691	0.0736457403991155	1.21621481605941	0.223903101155559	0.298209238582353
ARHGAP27	305.361838120689	-0.430600952259304	0.0583391724134202	-7.38099178383698	1.57114704103598e-13	9.93512030285685e-13
ARHGAP28	57.2445559377387	0.0700342657377685	0.104935505572073	0.667402947705503	0.504514783549314	0.608614628886398
ARHGAP29	366.842323028412	-0.456239469717683	0.0763644398491606	-5.97450162168247	2.30794638994297e-09	9.31172877352476e-09
ARHGAP30	358.880957188632	-0.786360250484844	0.0793564893437709	-9.90921167238568	3.79629676705849e-23	6.22232321894641e-22
ARHGAP31	2762.72932294213	0.435260629960459	0.0606513153686726	7.17644171960164	7.15491310163947e-13	4.2308340163945e-12
ARHGAP32	2130.82014141821	0.460692448707069	0.0554093695457273	8.31434200540537	9.22627265962278e-17	8.10438095960171e-16
ARHGAP33	1415.8432284815	0.279753690695933	0.0490332509640297	5.70538736868899	1.1607879430813e-08	4.33259587780724e-08
ARHGAP36	318.560127229979	-0.114687603371589	0.146507198739601	-0.782812069019438	0.433737479192389	0.534635083149791
ARHGAP39	673.15754152742	0.0302433978540335	0.0482911262808465	0.626272364784932	0.531136309354105	0.636400161277957
ARHGAP4	487.956494791181	-0.571475450842674	0.0790682211700563	-7.22762498493005	4.91513730815097e-13	2.95794796426022e-12
ARHGAP42	275.239683556308	0.0700966412835225	0.0717347935811083	0.977163769270019	0.328488081579944	0.41858414590246
ARHGAP5	3112.43236203091	0.0233177340484897	0.0481742882449381	0.484028615636887	0.628365560874806	0.733969996773097
ARHGAP6	211.349426286049	-0.501647675324239	0.0926839032690808	-5.41245736994751	6.21656576414345e-08	2.13901585504569e-07
ARHGAP8	9.39110837467918	-0.314100529961729	0.104934361788014	-2.99330481083277	0.00275973973068312	0.00521307711337657
ARHGAP9	136.815695625255	-0.834148150733925	0.0832302740839561	-10.0221723395084	1.21796000181187e-23	2.07221630386056e-22
ARHGDIA	5294.41870012631	-0.101015961440475	0.0388891467559968	-2.59753607026356	0.00938952580151945	0.0163121362106531
ARHGDIB	1400.12369979639	-0.855677134373145	0.0702596068818791	-12.1787919453024	4.03209905562078e-34	2.18655289007975e-32
ARHGDIG	469.483521119283	0.392708211016585	0.128069413725195	3.06637002226962	0.00216674990430671	0.00417302337014751
ARHGEF1	1253.83441736185	-0.319281773245207	0.0591711242373499	-5.39590513718294	6.8178963480471e-08	2.33571683973733e-07
ARHGEF10	853.803024978937	-0.397782859494137	0.0495440600273139	-8.02887085303135	9.83738454245353e-16	7.81788109480007e-15
ARHGEF10L	2311.0701599011	-0.0155701875721215	0.0634418894766542	-0.245424398619954	0.806127839219518	0.897090085083171
ARHGEF11	1672.14733948075	0.343888153133117	0.037703677407848	9.12081199436362	7.45635472610175e-20	8.87951257007338e-19
ARHGEF12	4163.60733011549	0.0920979380302846	0.0403097884100936	2.28475369538837	0.0223272741794002	0.036452230111391
ARHGEF15	92.2925553384345	-0.269462541149093	0.0748313564945675	-3.60093086336949	0.0003170798929453	0.000685150130914186
ARHGEF16	19.133256518956	-0.727980404664763	0.116041233596391	-6.27346316566049	3.53104492386079e-10	1.55222463881643e-09
ARHGEF17	2712.44623809383	0.41154525717806	0.0537323194849968	7.65917535521562	1.87130746671175e-14	1.30719260050464e-13
ARHGEF18	1298.48798389837	0.0396904350430867	0.0206222158656055	1.9246445339215	0.0542738439574575	0.0823922741036903
ARHGEF19	32.9655178168766	-0.583779029201516	0.087388118930018	-6.68030204047552	2.38450282649929e-11	1.19255432265342e-10
ARHGEF2	2936.09596905089	0.104948913842034	0.0410119766742196	2.55898209139491	0.0104979149284544	0.0180924054777293
ARHGEF3	870.628086305494	-0.216129152330954	0.0590069251491139	-3.66277605187498	0.000249496649747413	0.000546554813073427
ARHGEF33	18.4124621473701	0.238489729063633	0.0831559869861975	2.86798025863391	0.00413101308543451	0.00759088633333826
ARHGEF35	9.0508665607643	-0.583539351853913	0.110377879504567	-5.28674182248418	1.24514179330784e-07	4.14170601575952e-07
ARHGEF37	694.43536171328	-0.33696277164506	0.0774612364568272	-4.35008253234978	1.36086302778039e-05	3.52388696420112e-05
ARHGEF38	0.00193198688145164	0.0216866998873958	2.89081430390498	0.00750193461340662	0.994014378340019	0.999988810474289
ARHGEF4	3135.72739001643	0.239169877781381	0.0646277773573323	3.7007288129219	0.000214981130389567	0.000474694733787843
ARHGEF5	12.8145009491386	-0.801985871331471	0.124957011842845	-6.41809418698415	1.37990878016306e-10	6.35701014217408e-10
ARHGEF6	3754.97546428678	-0.00337199621731647	0.0562111051867064	-0.0599880789768553	0.952165129190017	0.999988810474289
ARHGEF7	3046.09035680007	0.272208821794464	0.0465493963249455	5.8477411800202	4.98293061092701e-09	1.93850769351784e-08
ARHGEF9	2328.36901115484	0.403354368321107	0.0547837450663458	7.36266510864902	1.80274237284335e-13	1.13340733342131e-12
ARID1A	2631.05759007073	-0.0296093514306733	0.0425851383340729	-0.695297763233577	0.486868715735941	0.590657627835696
ARID1B	1549.86757739511	0.250169285669615	0.0346134246806326	7.22752192185113	4.91886761988657e-13	2.95928817535046e-12
ARID2	668.898390993843	0.175809251090807	0.0405810273289522	4.33230163607458	1.47558590653316e-05	3.8044412010616e-05
ARID3A	44.6397721166136	0.0147043362543771	0.0601949436268642	0.244278594985091	0.807015060127926	0.897925133315523
ARID3B	83.7424523841861	-0.0224258873978397	0.0441610745212249	-0.507820238546534	0.611579415193215	0.717928367110647
ARID3C	0.802692973627569	0.692365082069817	0.198778635395951	3.48309606155955	0.000495650478903686	0.00104418660929142
ARID4A	752.283471370954	0.350735641620016	0.0387751728076629	9.04536630590341	1.49164203485963e-19	1.71179782220263e-18
ARID4B	1038.61428384846	0.0983756897324134	0.0286111268188948	3.43837173401524	0.000585223712786769	0.00122229483142786
ARID5A	555.90202238616	-0.592857586584268	0.0769820418859952	-7.70124527824616	1.3474655896978e-14	9.54131659467667e-14
ARID5B	1265.13743636796	-0.0865708431006963	0.0595163471581092	-1.45457252056674	0.145787643098042	0.202400010888282
ARIH1	1206.11373070439	0.0590908898043483	0.0291907811434292	2.02429971003532	0.0429393234560651	0.066456528204469
ARIH2	1710.90035953758	0.0902075229240256	0.0250183335494141	3.60565673752231	0.000311364491598713	0.000673539562320953
ARL1	1216.1122569456	-0.200325524790089	0.0316085976419098	-6.33769099975753	2.33233989975974e-10	1.04785184830917e-09
ARL10	138.518232777953	0.680278705119521	0.0662269218305288	10.2719360392488	9.42930728452469e-25	1.8003483404061e-23
ARL11	39.2725677104296	-1.01089631031884	0.0881540507102367	-11.467383542495	1.92388562129013e-30	6.77489954473992e-29
ARL13A	0.271062016986373	0.411447457707006	0.22719552555841	1.81098398261029	0.070143331121036	0.10410702504091
ARL13B	250.859666707721	-0.311894941514179	0.0413518068650704	-7.54247432359803	4.6113693368092e-14	3.09705920829373e-13
ARL14	0.0209772302101482	-0.0439678225087878	2.1832965062957	-0.0201382736527097	0.983933068369483	0.999988810474289
ARL15	194.014993812542	0.0340232676450083	0.0579526834698815	0.587087009744604	0.557145271499301	0.663284225549667
ARL16	608.133345863392	-0.0269793861198865	0.037072645189081	-0.727743757756802	0.46677045876054	0.569468638407266
ARL17A	67.3231052646932	0.293197895177985	0.0536949758791876	5.46043443315206	4.74970882418114e-08	1.65864854007461e-07
ARL17B	2.20268748271231	0.240525055591213	0.111387942580713	2.15934552715995	0.0308233705649529	0.0490151102327408
ARL2	1597.06065057776	-0.199282966160587	0.0499219732524791	-3.99188880521045	6.55491088949264e-05	0.000155630709033485
ARL2BP	1879.16713579265	-0.197196026227854	0.0307223139646212	-6.41865799740664	1.37480874688446e-10	6.33499770187749e-10
ARL3	1663.36060466711	0.29789052831856	0.0455181844799613	6.54442903911737	5.97231136386011e-11	2.87093893034399e-10
ARL4A	719.838036007929	0.128171949266055	0.0849423573572329	1.50892856348472	0.131317039466627	0.184364590393022
ARL4C	1042.10299582311	-0.574528144487688	0.102142730881748	-5.62475801780575	1.85768197074731e-08	6.78324422076811e-08
ARL4D	182.671489414316	0.264255679678424	0.0796891062399441	3.31608286435978	0.000912887563101105	0.00185412625666996
ARL5A	921.878238470528	-0.142134880213967	0.0298166755058052	-4.76695935421417	1.87027022024265e-06	5.41495356456487e-06
ARL5B	171.262768785995	0.417549942553068	0.0768616415218977	5.43248796519794	5.5573702822141e-08	1.92329173708482e-07
ARL5C	0.953069907044684	0.474072238840924	0.16663094232034	2.84504325690928	0.00444053922803316	0.00812605881787048
ARL6	83.865499468844	0.022537804298803	0.0544516292746273	0.413905049289406	0.678943645866172	0.782448666288601
ARL6IP1	7994.61590624089	-0.0277683156864121	0.0344256286619644	-0.806617533671716	0.41988686882436	0.519260237476926
ARL6IP4	1856.09904182972	-0.065146192111226	0.0489967513160387	-1.32960227691465	0.183649347537616	0.24930262783794
ARL6IP5	3074.06525759016	-0.280013142080884	0.0366274311967254	-7.64490254795476	2.09103636222041e-14	1.45294919838718e-13
ARL6IP6	529.017252569556	0.0791981558671454	0.0377306418319819	2.09904078016542	0.03581330603088	0.0562009669338228
ARL8A	2895.66995561242	-0.0468191895282564	0.0342904230300642	-1.36537217657559	0.172136104224925	0.235279767509211
ARL8B	2616.51039601418	-0.0813274815445	0.0350197633351937	-2.32233098682219	0.020215120270897	0.0332582233625246
ARL9	4.48868418335413	-1.79916314328474	0.247409993542896	-7.27199058340706	3.54228294569415e-13	2.16485066085033e-12
ARMC1	747.975856028035	0.102440017250218	0.0356766812192194	2.87134379514628	0.0040873073116569	0.00751809422817848
ARMC10	544.547038530588	-0.279386867405129	0.027529895477852	-10.1484899435923	3.36530131361813e-24	6.03882920315159e-23
ARMC2	40.4021548681253	-0.554374272188885	0.0778644393327238	-7.11973626137574	1.08133778695922e-12	6.24959904177696e-12
ARMC3	33.4803923960429	-1.88344835655182	0.206388873532992	-9.12572622889353	7.12568845875715e-20	8.49601316236429e-19
ARMC4	24.4772822312635	-0.882718515485765	0.131735987255008	-6.70066345483138	2.07475377034939e-11	1.04561003505703e-10
ARMC5	671.749567951629	0.268217820612652	0.0473407293015866	5.66568839495387	1.46435430957707e-08	5.41228212242294e-08
ARMC6	908.485138287411	0.032080400821777	0.036480132178497	0.879393766031545	0.379187811032036	0.474527149406588
ARMC7	286.314245259855	-0.0876792619742414	0.0320005971859105	-2.7399258040361	0.00614530554397794	0.0110223544084925
ARMC8	851.906797794617	0.156098465031783	0.0257668186305557	6.05811944694923	1.37722115998784e-09	5.68237236100621e-09
ARMC9	194.314383723553	-0.206844942586745	0.053467788658607	-3.86858981409263	0.00010946661487521	0.000251823105506429
ARMCX1	865.629166703673	0.20375283326097	0.0307215793138901	6.63223824462852	3.30634335487645e-11	1.63467255142778e-10
ARMCX2	848.201822190839	-0.321800188047781	0.0591044852117612	-5.44459844113059	5.19223833285375e-08	1.80358587581129e-07
ARMCX3	2582.76404618091	0.0757310969597895	0.0312838913646412	2.42076972065518	0.0154876849050766	0.0259866243911041
ARMCX5	204.640988245499	0.14116672806078	0.0413440911346502	3.41443539298097	0.000639143497029094	0.00132842780477433
ARMCX6	274.872933427129	0.0430042549902565	0.0364006165137887	1.18141556679311	0.237437676995683	0.314089152050267
ARMS2	0.431826097393094	0.235106232052498	0.23642312478744	0.99442993262133	0.320013601601681	0.409082911067543
ARNT	768.291039740932	-0.00478835712023933	0.0292743540229006	-0.163568327297453	0.870070979992287	0.953638487814486
ARNT2	8229.81927617224	0.253782159830808	0.0455050018945428	5.5770167951854	2.44678254252259e-08	8.82464535536043e-08
ARNTL	365.947789396038	-0.209445081024067	0.0597392208574773	-3.50598949932324	0.000454913166579756	0.000962589023338976
ARNTL2	39.2927162987402	-0.674800524328964	0.108867872514104	-6.19834399943423	5.706032224544e-10	2.45408005986779e-09
ARPC1A	2037.39800373842	-0.185755048661606	0.0271866289751009	-6.83258850634739	8.33959204712667e-12	4.38123483981021e-11
ARPC1B	1040.40972000326	-0.849013984624216	0.0751319623003919	-11.3003036075339	1.30765125604787e-29	4.17875243105557e-28
ARPC2	2818.344978417	-0.203335969121651	0.0256030092344571	-7.94187774021491	1.99143182216219e-15	1.53610248508083e-14
ARPC3	2296.26252735072	-0.328989929785085	0.0300597751864005	-10.9445239608421	7.058754761414e-28	1.87772415511398e-26
ARPC4	2770.91005967801	-0.19756774279641	0.0314183789517834	-6.28828569098392	3.20990794897188e-10	1.41865823923465e-09
ARPC5	2039.74096952549	-0.469854123929805	0.0391095101688807	-12.0138074320263	3.00676036863736e-33	1.47234024518971e-31
ARPC5L	668.472406374902	-0.0173447968438495	0.0409021082221859	-0.424056304130588	0.671524751556428	0.775214915223333
ARPM1	14.8351578314014	-0.254772071504546	0.107566122765071	-2.36851589473926	0.0178596129624274	0.0296580463274324
ARPP19	6344.75968585222	0.106669870566621	0.0358306510354147	2.97705644424906	0.00291030424325687	0.00547908751229069
ARPP21	897.320485116993	0.857349089338879	0.0881022781548775	9.73129307543808	2.21755852713964e-22	3.40238812211566e-21
ARR3	0.0112183800450457	-0.0329601540834471	2.89081430390498	-0.0114016849989028	0.990902968672616	0.999988810474289
ARRB1	535.44766755447	0.242419884664249	0.0816229340342854	2.96999718930002	0.00297802473769924	0.00559801537066555
ARRB2	1495.78775124066	-0.1781515593907	0.0410422589313346	-4.34068601557129	1.42038566634197e-05	3.6698112405751e-05
ARRDC1	418.826345668945	0.0243717663587383	0.0363806928091913	0.669909352374428	0.502915577474916	0.606834200232544
ARRDC2	1034.73617452572	-0.300980722678282	0.0894582355682905	-3.36448311065246	0.000766871776828756	0.00157626301836421
ARRDC3	1075.17315669359	-0.179568096773718	0.0500814491135298	-3.58552118503311	0.000336405691543719	0.000724920201208331
ARRDC4	1088.69590277149	-0.60551995478362	0.0714425913634411	-8.47561578083349	2.33839321420958e-17	2.18675868986773e-16
ARRDC5	2.88303277908695	-0.38022212199908	0.113035290388162	-3.36374702708688	0.000768919886865173	0.00157997786773914
ARSA	478.721366255256	-0.363207988794169	0.0610477489463429	-5.94957218018647	2.68844264987114e-09	1.07696364596486e-08
ARSB	491.70048285347	0.127809713664716	0.0367912136382672	3.4739194776597	0.000512914933366289	0.00107824972910246
ARSD	333.501438567009	-0.893682652760521	0.0906427840113653	-9.85939104262802	6.2426844995368e-23	1.002342939424e-21
ARSE	51.33501952611	-0.757390424317441	0.0977219345745387	-7.75046490447578	9.15567218277408e-15	6.57771558094554e-14
ARSF	59.3180066441287	-1.33445021478467	0.193503295708011	-6.89626608116435	5.33871586076425e-12	2.85655400160762e-11
ARSG	128.19363696432	-0.00228886972495422	0.0710676899784492	-0.0322068963497801	0.974307056541834	0.999988810474289
ARSH	0.0115591801251874	-0.0111426098218188	2.89081430390498	-0.00385448826884767	0.996924570935808	0.999988810474289
ARSI	54.9522676793607	-1.12323202751576	0.121740768195278	-9.22642467405858	2.79816014255193e-20	3.47738525291255e-19
ARSJ	80.1988688967482	-0.959162681866667	0.130568141682992	-7.34606979545924	2.04119817115422e-13	1.27680285984019e-12
ARSK	144.929309791202	-0.259353939581897	0.0445937419119128	-5.8159268198261	6.0298843601678e-09	2.31900253608233e-08
ART1	0.658925894179179	0.840286518214918	0.221798309533677	3.78851633261584	0.000151549631345265	0.000341763603280049
ART3	40.2726156286429	-0.688830331596352	0.139332217446109	-4.94379795443058	7.66151079424408e-07	2.32240283314898e-06
ART4	0.231930568539785	-0.275379388224965	0.512206679066785	-0.537633341147938	0.590830207431301	0.697491613698162
ART5	2.11022245297955	-0.148021351388511	0.148380080755651	-0.997582361693608	0.318481917559612	0.407336530905137
ARTN	10.2441207223625	-0.531592392479141	0.109410982684599	-4.85867487372428	1.1817400552771e-06	3.51132875292523e-06
ARV1	393.018221927377	-0.0369910074915724	0.0333247921663259	-1.1100146493622	0.266992713887517	0.348386024981822
ARVCF	1118.6078747708	0.184288792609715	0.0475289888428747	3.87739771235092	0.000105579692490383	0.000243593090327379
ARX	86.222825692734	-0.301512875226819	0.14660115274397	-2.05668829735188	0.039716218580318	0.0618083455414309
AS3MT	276.583659093075	0.182031504609702	0.0731584694840997	2.48818087493294	0.0128398412756187	0.0218228523148466
ASAH1	4475.28427900769	-0.282974191912008	0.0432050675594672	-6.54956022282626	5.77067666846802e-11	2.77740269483601e-10
ASAH2	4.04625210750455	0.684599683678311	0.120301694485942	5.69069028165941	1.26526825730283e-08	4.70383487157813e-08
ASAH2B	8.81269495596704	0.621279328221323	0.131989082249582	4.70705089869881	2.51326172547129e-06	7.15866836433257e-06
ASAM	12.2859524369613	-0.218892407574504	0.14460863438437	-1.51368836657905	0.13010489688553	0.182795504992031
ASAP1	1790.72047633412	0.0180285172696551	0.0422314629914225	0.426897767508475	0.669453791673806	0.773232288276646
ASAP1IT1	0.0128485766928408	0.021564341952562	2.71235768502947	0.00795040494532996	0.993656561469064	0.999988810474289
ASAP2	874.476785317268	-0.0654589158292004	0.0444914484738282	-1.47126960516258	0.141218219807539	0.19676391965681
ASAP3	1190.14372820562	-0.426791721829555	0.0713633054339157	-5.98054867602475	2.22387257052728e-09	8.98725755508716e-09
ASB1	1175.87687510315	0.482584354913939	0.0411629528667687	11.7237545245092	9.63070774729278e-32	3.99116804222018e-30
ASB10	0.0348414755775615	-0.153223748358486	2.7682149005328	-0.0553511030986049	0.9558587501503	0.999988810474289
ASB11	0.0808735943120609	-0.404637186532792	1.31907271854906	-0.306758816889095	0.759026957188436	0.85599803221165
ASB12	1.6043015767457	0.363437397249495	0.166417773165031	2.18388571327106	0.0289706470877325	0.0462707657543216
ASB13	938.635789226869	0.41108506066538	0.0471653755323063	8.71582291089369	2.8865421816742e-18	2.94107571667995e-17
ASB14	13.7221647658141	0.545717483343173	0.0606235425469975	9.00174190447735	2.22164332223807e-19	2.5133936090952e-18
ASB15	0.00181722974271011	-0.000130844374231799	2.89081430390498	-4.52621166482576e-05	0.999963886055949	0.999988810474289
ASB16	13.9210488769177	0.338075781076762	0.0714412597621015	4.73222031921819	2.2207717659487e-06	6.36608303665358e-06
ASB17	0.00180074156827874	0.0216866998873958	2.89081430390498	0.00750193461340662	0.994014378340019	0.999988810474289
ASB18	0.0081710144822857	0.0325336760281468	2.89081430390498	0.0112541563061313	0.991020671986555	0.999988810474289
ASB2	25.857059908872	0.208568672808254	0.16594654186614	1.25684253774023	0.208810659393746	0.279678698385105
ASB3	877.561212012284	0.0542990313256512	0.0417183444980838	1.3015624655994	0.193065997831453	0.260701342249428
ASB4	6.13444512955746	0.514769109223512	0.137766655944966	3.73652902941296	0.000186577917847011	0.000415379587516218
ASB5	14.3831949571823	-1.56610694268345	0.192962203098177	-8.1161331988246	4.81272445798804e-16	3.96063883593204e-15
ASB6	948.07591471287	-0.0860654604282557	0.026216879584136	-3.28282624757274	0.00102771988830514	0.00207302653973631
ASB7	354.724790095818	0.00304788502019424	0.0254149741136093	0.11992477374046	0.904542739493369	0.982179040593908
ASB8	859.076601961477	0.117150193859363	0.0212777556531506	5.50575896109683	3.67581184863691e-08	1.29604793552602e-07
ASB9	8.55218076745656	-0.622505567243361	0.0941224495658426	-6.61378417279602	3.74617812033115e-11	1.84318606666239e-10
ASCC1	936.558239523965	0.132202665457447	0.0401936679735067	3.28914160172163	0.00100493451367487	0.0020312286581466
ASCC2	1030.4638896193	-0.0504245923966874	0.034639680206616	-1.45568873892365	0.145478684304223	0.202056579448856
ASCC3	977.995245067218	0.120326357344146	0.0482659555077318	2.49298612403665	0.0126673796533921	0.0215520629625777
ASCL1	1576.18988352493	0.106683939869684	0.078276702085358	1.36290795380404	0.172911521681162	0.236241206572299
ASCL2	9.37501133499298	-1.24363222665196	0.108254848307262	-11.4880048893711	1.51572070334188e-30	5.44470110315418e-29
ASCL3	0.0262532025627697	0.0541522951445111	1.65334801409879	0.0327531134901617	0.973871468146843	0.999988810474289
ASCL4	0.545020602320923	-0.146295898181337	0.247272085911163	-0.591639358087093	0.554092112410008	0.660208415519097
ASF1A	825.177737049594	0.203864087700809	0.03870404197647	5.26725575134369	1.38478223014554e-07	4.57910939029312e-07
ASF1B	112.854200574276	-1.11288914023435	0.127941045841569	-8.69845273589877	3.36439883359701e-18	3.40155064403478e-17
ASFMR1	0.418238782588635	0.387885721490774	0.220387311290198	1.7600183931643	0.0784046880143581	0.115170232338082
ASGR1	126.609412153324	0.423402846277243	0.0734253306896286	5.76644112189268	8.09629763026398e-09	3.06668498848848e-08
ASGR2	6.81369466377418	-1.24857548257464	0.133820604867027	-9.33021849524074	1.056528803751e-20	1.36111056949205e-19
ASH1L	2686.90514051404	0.281475667760462	0.0436431448461263	6.44948178580778	1.12233247208761e-10	5.22542921311368e-10
ASH2L	1040.90306766585	-0.0318034664675913	0.0234282448117833	-1.35748395678347	0.174627487655509	0.23827374167136
ASIP	6.98357871752418	-0.671044519447849	0.161448199052509	-4.15640758699081	3.23290853427686e-05	7.94008789734748e-05
ASL	306.008718937099	-0.306657030060524	0.0494827897037677	-6.19724619198612	5.74595888942694e-10	2.47017254287769e-09
ASMT	0.568191497203124	0.0189907648367329	0.2512593025729	0.0755823352300475	0.939751390702626	0.999988810474289
ASMTL	1116.92371256412	0.0653543396625952	0.0456842826380968	1.43056508472118	0.152554900134888	0.210947120620629
ASNA1	1857.45854963595	-0.0467176136619132	0.0271928076560203	-1.71801361054272	0.0857941327421862	0.125156180749217
ASNS	917.355695211134	-0.0479961797602448	0.0538031714769087	-0.892069713415385	0.372355567249512	0.466897212644541
ASNSD1	1087.20671015012	0.0603627248964539	0.0221418001541498	2.72618867825617	0.00640703619666189	0.0114531881158091
ASPA	156.297165952306	-0.405897788785383	0.10580321897947	-3.83634631063675	0.000124878283251613	0.000284912958484933
ASPDH	78.1015587722334	0.29067609928302	0.118705098505147	2.44872463730288	0.0143363002355966	0.0241763103004985
ASPG	1.13395886167379	0.856203860138939	0.297962414778429	2.87352973956675	0.00405912859842542	0.00747045123971619
ASPH	2851.45935766021	-0.0414593424823057	0.0430051865417772	-0.964054473802367	0.335018615835262	0.426105928327009
ASPHD1	639.361523591079	0.366738831513522	0.100250682918093	3.65821778803396	0.00025397519209542	0.000555747182792167
ASPHD2	224.635398701635	-0.0428779146255693	0.0739208475373537	-0.580051718209835	0.561879741634056	0.667870461570339
ASPM	136.5016297774	-1.16470494428369	0.163063656365727	-7.14263969201961	9.15553928857847e-13	5.34321941582174e-12
ASPN	23.2615296218357	-1.34294275527841	0.129396499053913	-10.3785091953599	3.10587192546364e-25	6.25783918656619e-24
ASPRV1	137.136507440589	-0.000445265774853526	0.0492388195453716	-0.0090429823250176	0.992784842356612	0.999988810474289
ASPSCR1	569.355161374865	0.0492110107543175	0.0490740761402046	1.00279036560407	0.315962018304679	0.404428918026373
ASRGL1	1267.99208618353	0.0695280097861829	0.0530140684456376	1.31150111328428	0.189688517854627	0.25658066886335
ASS1	311.27246658335	-0.353415896807127	0.116277659510807	-3.03941357517849	0.00237039202427087	0.00453065025709021
ASTE1	159.620028310684	-0.137783100917528	0.030350373410506	-4.53974977684569	5.63210260385133e-06	1.53514178561082e-05
ASTL	0.211516865931547	0.379483649541544	0.397772602138028	0.954021587967143	0.340072714947341	0.431502603695914
ASTN1	4695.36098668782	0.425369636607052	0.0542245007047045	7.84460218312619	4.34328119275773e-15	3.212983475364e-14
ASTN2	2061.73537450852	0.202670420281121	0.0623617572069604	3.2499151620843	0.0011543944126646	0.00230914073908166
ASXL1	1699.42912240281	0.0835061119008697	0.0290222920405957	2.87730933807927	0.00401082204270321	0.00739122186019592
ASXL2	421.133452374162	0.242899430113518	0.0807957415391392	3.00633951104777	0.00264413589895542	0.00500912473976878
ASXL3	163.791212702659	0.336993887941658	0.0846570980900878	3.98069264768615	6.87147495771324e-05	0.000162656306568765
ASZ1	0	0	0	0	1	NA
ATAD1	1156.18096641205	0.339284245475673	0.0416172673422327	8.15248734823517	3.56514258381708e-16	2.97120371559862e-15
ATAD2	537.079620081138	-0.289867077486721	0.0652512844439018	-4.44231987089737	8.89941275331646e-06	2.36130125419914e-05
ATAD2B	287.81681561083	0.219102974153598	0.0412956319498422	5.30571791272553	1.12230403021395e-07	3.75340720943962e-07
ATAD3A	683.672720385615	-0.190361777241729	0.0505212596298078	-3.76795389973639	0.000164591087882231	0.000369017718104979
ATAD3B	286.124468426157	-0.0443721964390851	0.0714278052508108	-0.621217413628728	0.534456583466318	0.639677621787224
ATAD3C	34.3044546494426	-0.877746037442865	0.117196958110059	-7.48949504831496	6.91390925173621e-14	4.54121800535293e-13
ATAD5	65.0037247351136	-0.165939068122276	0.0828308923940597	-2.00334758356626	0.0451399934072517	0.0695398943670176
ATCAY	5072.03799097333	1.02205531022779	0.10308310586654	9.91486724848037	3.58733020812483e-23	5.88471626224477e-22
ATE1	228.044465183133	0.437496797075183	0.0682558787068685	6.40965738576241	1.45847018517946e-10	6.69995351491309e-10
ATF1	211.787689763244	-0.0264843224213588	0.0320728940254826	-0.825754058873404	0.408943619681853	0.507249852138455
ATF2	535.106829094091	0.247107059906522	0.0575395992277515	4.29455650061847	1.75042900176525e-05	4.4651023583969e-05
ATF3	410.192914129968	-0.912724210880542	0.114808738689054	-7.9499541698873	1.86580526956356e-15	1.44429322577109e-14
ATF4	4732.65889495908	-0.0103246343812537	0.0372701430826496	-0.277021592279857	0.78176352647947	0.875678659374538
ATF5	441.557329909208	-0.362043325317878	0.0648499757947603	-5.58278273632185	2.36700366087795e-08	8.55258206027578e-08
ATF6	1051.25457975539	0.0188401950583031	0.0402077934819309	0.468570727880647	0.63937650467033	0.744520940220967
ATF6B	1810.08195750168	0.104488375876648	0.0252100404281057	4.1447127454884	3.40239949300038e-05	8.32002907077173e-05
ATF7	1153.26572842844	0.0372419686614873	0.0365318131465618	1.01943937225553	0.307994422270856	0.395206974930044
ATF7IP	1132.41566747295	0.212894033856787	0.069455187045925	3.0651999211523	0.00217524539766063	0.00418774627412708
ATF7IP2	29.8030526448884	-0.480905678995201	0.0924985195558945	-5.19906352343944	2.002950717669e-07	6.49770680245784e-07
ATG10	66.0152568149454	-0.21760438885973	0.0401314611324225	-5.42228921448181	5.88405792643751e-08	2.02815059152377e-07
ATG12	606.007235684907	0.0943427801390061	0.0238220857033289	3.96030730952423	7.48533725628689e-05	0.000176402327175874
ATG16L1	455.406869618086	0.0217300133143263	0.0332351894090341	0.653825469350855	0.51322425554715	0.617833871724905
ATG16L2	442.457120704678	0.216906325812146	0.0575762923659405	3.76728540340083	0.000165032295771025	0.000369880535381149
ATG2A	1078.12589825722	0.182857413626881	0.0277090811227104	6.59918720570676	4.13418009813948e-11	2.02441132417601e-10
ATG2B	915.666168707008	0.25709054706175	0.0390054326210975	6.59114717580887	4.36440963377517e-11	2.12973236591136e-10
ATG3	886.793667306238	-0.1068752924875	0.0250824117311263	-4.26096555758518	2.03545603164783e-05	5.14483204712217e-05
ATG4A	174.776185811907	-0.249252017334098	0.0330979970323398	-7.5307281310877	5.04581497884532e-14	3.37528142387441e-13
ATG4B	1403.67085907691	0.0664666132617661	0.0364589945229544	1.82305118754493	0.0682956385598408	0.101655927792096
ATG4C	261.663150870135	-0.569838716770384	0.0471944731003556	-12.0742680092786	1.44443856404105e-33	7.34722819977987e-32
ATG4D	358.600501995693	0.0295799921122754	0.0400362350009116	0.738830514697544	0.460009919931629	0.562510577329737
ATG5	541.057377715268	-0.0534130694507459	0.0246814769483607	-2.16409534820377	0.0304570324581278	0.0484735807235595
ATG7	767.772155086	-0.131726470635788	0.0294602602471221	-4.4713274604781	7.77355626500501e-06	2.07657015981305e-05
ATG9A	2313.21299897593	0.0997571276429117	0.0265140933787201	3.76241896028681	0.000168277843910084	0.000376897184818523
ATG9B	27.4174653771082	-0.647294811902139	0.121862566485602	-5.31167880809911	1.08619922008874e-07	3.63760320643874e-07
ATHL1	310.105227468074	0.0558588557081848	0.0959546647560307	0.582137990375024	0.560473737501308	0.66656147430602
ATIC	1360.62784855	-0.0592922919520398	0.0395373815279429	-1.49965146048266	0.133704710141218	0.187436064601187
ATL1	894.323544436911	0.220784012468568	0.0698020160088711	3.16300337859166	0.00156150519415357	0.00306554600048998
ATL2	455.07795177824	0.0183142020711935	0.0362299592309068	0.505498831905119	0.613208518672895	0.719540396404145
ATL3	186.97621483747	-0.339250993598681	0.0748375128151405	-4.53316767002505	5.81056547131415e-06	1.58050271248886e-05
ATM	1511.17054086875	0.226226549632161	0.0428116945173305	5.28422320542774	1.26239259606292e-07	4.19625097154653e-07
ATMIN	1814.18104346936	0.0461599065346967	0.0276933947700119	1.6668200817576	0.0955501858590175	0.138119063638916
ATN1	9165.83908649314	0.137691799382675	0.036471286598902	3.77534801272462	0.000159784426577967	0.000358976995798593
ATOH1	0.0530362420599859	-0.131606253439806	1.27245830893801	-0.103426770461065	0.917624266319151	0.992332784842745
ATOH7	13.2052459939052	0.247925030492684	0.128641884897971	1.92724967213688	0.0539485223344768	0.081948966907491
ATOH8	1831.86358750797	0.717218801113017	0.10233271910926	7.00869484712163	2.40551452252013e-12	1.33839890830438e-11
ATOX1	771.330788412707	-0.22437878809514	0.0508810769504303	-4.40986711648686	1.03434069953352e-05	2.71878711047101e-05
ATP10A	511.208151416764	0.24435671970173	0.0741746230253036	3.29434393779624	0.000986517082615423	0.00199564163716829
ATP10B	269.816951562936	-0.364859814203245	0.106689624202581	-3.41982471988516	0.000626614967142421	0.00130417801101698
ATP10D	406.646673764465	-0.116105097176162	0.0562783584142556	-2.06305053039273	0.039107827549707	0.0609193309579791
ATP11A	1241.15014660464	-0.144766042518491	0.0520805808183474	-2.77965491635785	0.00544166910259367	0.00984190153294344
ATP11B	505.57337708188	-0.0309301307876598	0.0408537940154638	-0.757093228010897	0.448994010918154	0.551025380606226
ATP11C	240.128206881079	-0.0372366492742617	0.0491379300903724	-0.757798491018602	0.448571625877229	0.550630600815453
ATP12A	0.978121807214621	-0.251479334897158	0.256407009724522	-0.980781824831314	0.326700342925339	0.41668370159941
ATP13A1	1645.6699139408	0.127680947978948	0.0378408173871894	3.37415935476524	0.000740414920340516	0.00152586554720509
ATP13A2	1972.03996029864	0.0278555896618361	0.0514118111697973	0.541813039222402	0.587947307859562	0.695036197166435
ATP13A3	1082.65080926694	-0.0763317971035204	0.0432531434445887	-1.76476877804982	0.0776026339844634	0.11409424527479
ATP13A4	715.865106873596	0.15558528229616	0.0829128174683026	1.8764925260879	0.0605876800239325	0.091171395734374
ATP13A5	42.0575925430146	-0.102863912768458	0.121101962533652	-0.8493992220801	0.395659185887203	0.492727973314961
ATP1A1	8099.7887084605	-0.187139934554424	0.0639144585113569	-2.92797496705963	0.00341177513037843	0.00635751547155427
ATP1A2	24695.0543387364	-0.0326368482820056	0.107844198603206	-0.302629614802808	0.762172142808684	0.858905348705573
ATP1A3	6774.21425399866	0.495544303776846	0.0989516542307602	5.00794360265279	5.50146483892893e-07	1.69557437536114e-06
ATP1A4	6.08259788503856	0.725763257597684	0.158001756076136	4.59338728645498	4.3610861649104e-06	1.20589944031832e-05
ATP1B1	4086.36708271356	-0.153756528157875	0.101373497902023	-1.51673298583896	0.129334112571762	0.18182702513749
ATP1B2	15284.0363043217	-0.0772107327888912	0.0619972138391202	-1.24539036527108	0.212988293137101	0.284731718193809
ATP1B3	1572.18089755759	-0.157998687146989	0.0352128014330837	-4.48696725954169	7.22441713689554e-06	1.93803013545637e-05
ATP1B4	1.26118920110093	-1.140566934184	0.311319199756485	-3.66365754208591	0.000248639168273234	0.000544737009177363
ATP2A1	15.6625437022603	0.0297507329706963	0.0970632132096908	0.306508840856362	0.759217249531372	0.856148004626318
ATP2A2	8542.85157246003	0.257251341888954	0.0422421061977415	6.08992697202934	1.12962204330008e-09	4.71014825722561e-09
ATP2A3	72.4794695619238	-0.852129549675514	0.101417329862523	-8.40220848676082	4.38159027794203e-17	3.98206854207243e-16
ATP2B1	1746.33243988028	0.0640214639036752	0.0950524779684328	0.673538084140604	0.500605028423359	0.604527942120963
ATP2B2	2351.29627655003	0.437047165744379	0.100499392573401	4.34875430142703	1.36912995655302e-05	3.54436128284407e-05
ATP2B3	354.84837517213	0.563641619889354	0.168336371803949	3.34830562075908	0.000813072943790022	0.00166410281747833
ATP2B4	5543.64810658295	-0.26056197410032	0.0605789488522707	-4.30119668691731	1.69878187200208e-05	4.33672949686953e-05
ATP2C1	2576.79689816612	0.0575950729734763	0.0298780685741579	1.9276705530856	0.0538961170499444	0.0818819992381073
ATP2C2	42.3989696519177	0.54755368645773	0.117274930936964	4.66897470826091	3.02706637905455e-06	8.54795605676212e-06
ATP4A	0.8015265821383	0.472638037034499	0.449298621740892	1.05194633182531	0.292824173223695	0.378156783435572
ATP4B	0.1765158533283	-0.612956737150774	0.49862707412416	-1.2292889194343	0.218963500244683	0.292164068482111
ATP5A1	9940.76318789122	0.101277533090149	0.031913188671144	3.17353223878014	0.00150596176097223	0.0029633004063113
ATP5B	10918.5033515241	0.0885716263117038	0.0367714909997198	2.40870369690418	0.0160092896427646	0.026802421042509
ATP5C1	2395.16346512153	0.0685777578299697	0.0368338804747518	1.8618119227752	0.0626296053326522	0.0939396358559325
ATP5D	1515.48645756284	-0.00638335105433212	0.06279997231652	-0.10164576223313	0.919037854523746	0.993206706906392
ATP5E	3219.5951506723	-0.23799277219139	0.0454852178091445	-5.23231026814042	1.67404447748624e-07	5.48403487091307e-07
ATP5EP2	31.5361664854318	-0.407215556338592	0.0658326224505108	-6.18561954819153	6.18590344056532e-10	2.6483146852442e-09
ATP5F1	2490.78580222248	-0.326103136211132	0.0322604935210242	-10.1084360658838	5.06869162866283e-24	8.9246149114694e-23
ATP5G1	954.52504429937	-0.0657820777406178	0.040619221428246	-1.61948150229374	0.105343703301337	0.150912655519018
ATP5G2	4360.38534734016	0.0972927257555334	0.0426235852204567	2.2826030530355	0.0224537609656967	0.0366290117352896
ATP5G3	2070.53362204057	-0.124586329790419	0.0458179059025579	-2.71916246140494	0.00654474542288795	0.0116823824491793
ATP5H	1643.52699770885	-0.21894328323351	0.0371157552950875	-5.89893110062854	3.65863962116023e-09	1.4447406407731e-08
ATP5I	1438.75113666563	-0.064284658542587	0.0526778768416976	-1.220335032404	0.222337894650901	0.29630502039151
ATP5J	1594.65776247455	-0.0529454151734804	0.0321138128854358	-1.64868044048087	0.0992131193229414	0.142910160535058
ATP5J2	1505.19504969198	-0.248259602637078	0.0435303538488231	-5.70313771165888	1.17621878535843e-08	4.38686373432751e-08
ATP5L	2148.74531724087	-0.126505311980501	0.0371013427033952	-3.40972328122572	0.000650288232530597	0.00135016600119869
ATP5L2	0.252035978812733	-0.199202701034715	0.320535736916237	-0.621467992777264	0.534291747621106	0.639558105924078
ATP5O	2747.3136612246	-0.0428718610248659	0.0369106489255621	-1.16150385519707	0.245437056298213	0.323323860886725
ATP5S	194.096683234061	0.24306223288674	0.0341253797539789	7.12262353236963	1.05891770144834e-12	6.13262575846149e-12
ATP5SL	623.333573626854	-0.268461970938805	0.0340093421776493	-7.89377135072127	2.9318909955109e-15	2.20958170928913e-14
ATP6AP1	3988.54134747831	0.00127808701917683	0.0312411163470376	0.0409104144992573	0.967367314829733	0.999988810474289
ATP6AP1L	75.3756551060689	0.191069515240363	0.0504761311595766	3.78534390118591	0.000153496160706555	0.000345836319504239
ATP6AP2	3494.69592959471	-0.112032796277236	0.030669634437683	-3.65288984793325	0.000259305486019637	0.000566717940745704
ATP6V0A1	4520.98074596484	0.320702442439843	0.0442049642788385	7.25489654096083	4.01968964533412e-13	2.43919823268811e-12
ATP6V0A2	557.978533204567	-0.0073588479146263	0.0345804023885106	-0.212803998980396	0.831479844452316	0.919429319067736
ATP6V0A4	8.9953371062632	0.641328311834596	0.243594607341645	2.63276892224106	0.00846919464978825	0.0148244795199255
ATP6V0B	1951.40000810701	-0.324341413878269	0.0429785371474909	-7.54659035427883	4.46801139556003e-14	3.003852606612e-13
ATP6V0C	4029.96317680568	0.103949249933203	0.0457203337978281	2.27358904230355	0.0229907069084911	0.0374459759633995
ATP6V0D1	2738.46593080699	0.0604772427130159	0.03628064635984	1.66692848063368	0.0955286269005945	0.138098040723963
ATP6V0D2	1.93848134215375	-0.136787289971115	0.335914812783986	-0.407208270565542	0.683855027683968	0.787095025431732
ATP6V0E1	2206.40052358054	-0.267497108413105	0.0400998424073026	-6.67077704934799	2.54452529334852e-11	1.26936088189472e-10
ATP6V0E2	7351.28930768348	0.174651406942518	0.0458091828005429	3.81258508153192	0.000137520866659115	0.000311805835082318
ATP6V1A	2777.85960317972	0.19994599415654	0.0558564497381622	3.57964022228095	0.000344067585560968	0.000740053586294543
ATP6V1B1	59.6010500793328	0.410634261187134	0.105222725103477	3.90252448587806	9.51946046086594e-05	0.000220953400745367
ATP6V1B2	4151.15461800772	0.0711598511982335	0.0574584449457842	1.23845765866754	0.21554641261086	0.287916884864272
ATP6V1C1	2147.19674889006	0.147876721925581	0.0495079023588322	2.98693167918475	0.00281792689457545	0.00531381271383444
ATP6V1C2	29.5762424783852	-0.11724694317638	0.0460540131374684	-2.54585724867027	0.010900975659647	0.0187329293636098
ATP6V1D	1513.15628097317	-0.0365409006756317	0.0420970823749538	-0.868015040808913	0.385386098764714	0.481396367420737
ATP6V1E1	2870.59539335586	-0.0242458570110639	0.0482098346299768	-0.50292346358699	0.615018083809795	0.721276793553519
ATP6V1E2	79.6682789017705	-0.0622512069689728	0.0486476760317951	-1.27963372655842	0.200673982594215	0.269956081963174
ATP6V1F	2265.29288417152	-0.226423590989871	0.037240572961623	-6.08002436544689	1.20164286379577e-09	4.99458187791801e-09
ATP6V1G1	1658.65285437368	-0.0546248706562558	0.0235782169820244	-2.31675154647617	0.0205172698648759	0.0337243200810023
ATP6V1G2	2644.46712006438	0.520402675360512	0.0832103562819576	6.25406137665283	3.99913725844035e-10	1.74862321040423e-09
ATP6V1G3	0.00550086020803405	-0.02198958596257	2.89081430390498	-0.00760670996157238	0.993930782092764	0.999988810474289
ATP6V1H	1539.72783333297	0.0790799990124152	0.050836063873282	1.55558855244057	0.119805962587715	0.16953348957941
ATP7A	215.691260236845	-0.162945879124983	0.0458692533168203	-3.55239877134059	0.000381735866553841	0.000816524017506504
ATP7B	169.146337579699	0.465877902586408	0.055311136051253	8.42285904514257	3.67406398093033e-17	3.36546996112673e-16
ATP8A1	2315.69607449823	0.444914894759065	0.0772402524073205	5.76014294221671	8.40427332209639e-09	3.17783558097325e-08
ATP8A2	122.035301622874	0.798395467339998	0.170906655022918	4.67152942191126	2.98965264595654e-06	8.44715262460951e-06
ATP8B1	38.2832253782756	-0.663183351598748	0.0959813619583021	-6.90950136638881	4.8636018670717e-12	2.61584706976247e-11
ATP8B2	730.662395947868	0.00434753591968544	0.0351534377984599	0.123673136738732	0.90157408211709	0.980090888362873
ATP8B3	22.8700720756972	-0.449463541230865	0.0789969381217852	-5.68963243281596	1.27313119407508e-08	4.73127950828166e-08
ATP8B4	133.146446099656	-0.680217125036969	0.0895649043634042	-7.59468376449138	3.08545002851323e-14	2.10527153591969e-13
ATP8B5P	28.5766143108262	-0.316912551622468	0.0568702312781703	-5.57255605436785	2.51028682490262e-08	9.04208529701884e-08
ATP9A	8390.65237462569	0.408376325511342	0.0594643529001518	6.86758209909486	6.52991743299529e-12	3.46659721328242e-11
ATP9B	459.855908630473	0.0518193558538399	0.029615320250904	1.74974828618503	0.0801617576811209	0.117488213830159
ATPAF1	1826.44203314156	-0.183837546423146	0.0441391184228218	-4.16495736643652	3.11410752018798e-05	7.667442968718e-05
ATPAF2	326.740994483328	-0.0580547117213291	0.0274973005687976	-2.11128767262363	0.0347475929749134	0.0546767680024916
ATPBD4	132.367758858063	-0.139342419327048	0.0419000997998579	-3.32558681226626	0.000882326188729561	0.00179594571658995
ATPIF1	1341.73163694025	-0.171466598425344	0.0422223309202088	-4.0610405604887	4.88544821404173e-05	0.000117452428057415
ATR	438.197447188874	-0.092703379169081	0.0343561093334665	-2.69830842221643	0.00696928386639946	0.0123750994867467
ATRIP	206.232248621885	0.114579606453861	0.0435941051857735	2.62832798071179	0.00858057407563266	0.015008761389624
ATRN	2662.80655290717	0.191366817335142	0.033075833156406	5.78569907612678	7.22113842927147e-09	2.74950622238859e-08
ATRNL1	916.635840219502	0.488066014060798	0.0988710961786166	4.9363872043967	7.95830297355063e-07	2.40791875244919e-06
ATRX	1760.16455685739	0.332710324956695	0.0750078134735326	4.43567555897488	9.1783995322799e-06	2.43041155223204e-05
ATXN1	1376.13817273884	0.130128659859932	0.0407561247403551	3.19286145797574	0.00140870515536122	0.00278501164841675
ATXN10	3132.40626680413	0.113099106256168	0.0271925997127646	4.15918696449894	3.19382398435102e-05	7.84997192308027e-05
ATXN1L	1167.01728570162	0.111763237869463	0.0328543366591896	3.40178038074014	0.000669484148189954	0.00138724162706518
ATXN2	1093.49989474744	0.036757465243208	0.0268731332144965	1.36781464780517	0.171370101527905	0.234330400706919
ATXN2L	2613.25131455434	0.177199485427546	0.0287949850054223	6.15383148816289	7.56330469955705e-10	3.20800803729327e-09
ATXN3	271.100221417031	0.16546448067502	0.029538751754154	5.60160707033772	2.12373539960422e-08	7.71038940265751e-08
ATXN3L	0.00206666478950534	0.0216866998873958	2.89081430390498	0.00750193461340662	0.994014378340019	0.999988810474289
ATXN7	441.251210286498	0.168166064034888	0.0322468714787013	5.21495749272791	1.83859391838357e-07	5.99118048061259e-07
ATXN7L1	175.716055239021	0.0900595853238744	0.0502889584093909	1.79084212861837	0.073318632619003	0.108403623645998
ATXN7L2	262.329945591986	0.131165089666382	0.0648284377560513	2.02326469997557	0.0430458642553972	0.0666057096264341
ATXN7L3	1580.3456793761	0.140392292518719	0.0515891916709744	2.72135088710274	0.00650157094882763	0.0116103768250796
ATXN7L3B	3751.05171028721	0.2396705603884	0.0359064453081284	6.67486180633271	2.47465241209158e-11	1.23638407949296e-10
ATXN8OS	0.0394881979635092	0.0322113482761825	1.54073792257064	0.0209064421692429	0.983320287640261	0.999988810474289
AUH	185.069798450188	-0.0589393741271488	0.0431593203078033	-1.36562331628036	0.172057224361497	0.235188282866195
AUP1	2087.39131946966	-0.0624676217899245	0.0314593665104725	-1.98566051128619	0.0470710325225079	0.0722152034296289
AURKA	90.7344987154758	-0.820613160875475	0.092673683410063	-8.85486721450815	8.37834921559844e-19	8.95373530450897e-18
AURKAIP1	1303.9336248445	-0.200228856831059	0.0553045122389506	-3.62047957255174	0.000294057467605907	0.000637713038429249
AURKAPS1	3.81125024706113	-0.509255649686331	0.107686008132962	-4.72907909314961	2.25540514277081e-06	6.45784003424632e-06
AURKB	78.5178086424291	-0.928914123184526	0.172681499141044	-5.37934942541704	7.47554889375627e-08	2.54966136802608e-07
AURKC	17.8279870710782	-0.637803429153164	0.109445995595829	-5.82756295176387	5.62426370864821e-09	2.17170716172499e-08
AUTS2	1111.02717353577	-0.0705114431812306	0.0514029401433656	-1.37173949553411	0.170144548550738	0.232913451892995
AVEN	132.107985054791	-0.137807819657232	0.0405369942486586	-3.39955692846644	0.000674951276664064	0.00139827571891519
AVIL	63.2821651399333	-0.902673433565149	0.115356221453806	-7.82509536277259	5.07272238521587e-15	3.72738111806548e-14
AVL9	298.486125954906	0.281820779710279	0.064130314014799	4.39450178967228	1.11027089139571e-05	2.90904864862566e-05
AVP	0.196506848771597	0.445140251224907	1.44290968875651	0.308501810399878	0.757700522879423	0.854844956034012
AVPI1	193.988907240814	0.0476547985595344	0.0628333235566008	0.758431925323934	0.44819245172691	0.550260211533959
AVPR1A	6.00612252882501	0.0193720767971647	0.155988378502838	0.124189231166425	0.9011654485153	0.979776219014711
AVPR1B	0.153616634800209	0.0964298605624533	0.579494964430067	0.166403276096268	0.867839595947466	0.951518805714748
AVPR2	1.27492884959765	0.113812301067938	0.206212017369158	0.55191885768807	0.581003947732299	0.68769543088872
AWAT1	0.0074693839865672	0.0325336760281463	2.89081430390498	0.0112541563061311	0.991020671986555	0.999988810474289
AWAT2	0.516293600938997	-0.0122534006426026	0.368162872453034	-0.033282553889694	0.973449266031443	0.999988810474289
AXIN1	861.377159129197	0.142244022819904	0.0319382216687853	4.45372395166653	8.4393592530879e-06	2.24619776767219e-05
AXIN2	534.448099001104	0.165567400506942	0.0530433617996062	3.12135948570612	0.00180018134433522	0.00350718228060557
AXL	1297.72311539437	-0.386660150395127	0.063766933802867	-6.0636465850855	1.33069388646127e-09	5.50540335329764e-09
AZGP1	571.194868155999	-0.203277237108238	0.161844523548916	-1.25600318534596	0.209114815201654	0.280067025258168
AZI1	471.743405621658	0.0990781361131382	0.0545639507836915	1.81581675612008	0.0693984860547746	0.103118145983412
AZI2	847.724472405214	0.029889570847479	0.0232364638847986	1.2863218343232	0.198330765415831	0.267114197948183
AZIN1	4874.36800186726	0.147112295582512	0.0335787291633134	4.38111564219768	1.18073180399775e-05	3.0831310600795e-05
AZU1	2.90639334927514	1.06619317838521	0.182433721206194	5.84427687675214	5.08773459943826e-09	1.97616526420565e-08
B2M	22003.2722190684	-0.693330674847192	0.0655025235895347	-10.5847933308934	3.50553488001968e-26	7.8954752989917e-25
B3GALNT1	660.206698592678	-0.0950082381453536	0.064501748530451	-1.47295600987469	0.140762897799257	0.196185049786064
B3GALNT2	321.534878604368	-0.346105548499188	0.0499083315438083	-6.93482506413554	4.06724144897424e-12	2.20743446162277e-11
B3GALT1	37.0065159471766	0.0431363487755823	0.116973118248468	0.368771470073614	0.712298071763078	0.813034184312663
B3GALT2	336.190142286917	0.343098988119341	0.0808168204591531	4.24539082545015	2.18212737625865e-05	5.48877809885657e-05
B3GALT4	123.588226122759	-0.338290510160554	0.0647990769139038	-5.22060693256524	1.78337696898272e-07	5.81702993113915e-07
B3GALT5	11.1942445561051	-0.0663868749594454	0.109695724458025	-0.605191089146305	0.545052035897014	0.650381846798371
B3GALT6	628.609857927124	-0.137652709575824	0.0522151303975392	-2.63626095592996	0.0083825238745332	0.0146897518445817
B3GALTL	566.128012831957	-0.436307319495904	0.0631581049234106	-6.90817623525908	4.90923882252677e-12	2.63895047027415e-11
B3GAT1	4197.18505678706	0.312228077619609	0.0591723695422317	5.27658567731971	1.31612993625363e-07	4.36455825390038e-07
B3GAT2	703.680622022447	-0.0951987834334206	0.117392467206398	-0.810944566537166	0.417397505360796	0.516499238938098
B3GAT3	1118.86121474263	-0.10258690135822	0.0435559210122153	-2.35529174849612	0.0185081680045199	0.0306626230574798
B3GNT1	3942.21094573094	0.134178314644997	0.0471047355140945	2.84851009522915	0.00439244597999129	0.00804552890258943
B3GNT2	230.328161209286	-0.251426320430802	0.0484147586718581	-5.19317512527328	2.06737546574154e-07	6.69787459564222e-07
B3GNT3	0.238611352344607	-0.788158716791402	0.643870051781356	-1.22409594080491	0.22091603715182	0.294600822493796
B3GNT4	17.1545697952181	0.317445934833871	0.168859639399112	1.8799396703884	0.0601163005384412	0.0905701344022054
B3GNT5	222.636933740723	-1.1182215106963	0.0986342772046109	-11.3370477524422	8.59968094888565e-30	2.80272714368897e-28
B3GNT6	0.308489340351558	-0.0798442049377367	0.248093451497148	-0.321831166666866	0.747580601824314	0.845285932415771
B3GNT7	99.368044108494	-1.65590110712356	0.133072293599544	-12.4436203985984	1.51479100946615e-35	9.65005211046639e-34
B3GNT8	6.05640643770799	-0.97306191045536	0.113911769586537	-8.54224207022035	1.31642297198133e-17	1.25612148344413e-16
B3GNT9	460.641050595532	-0.365138233367551	0.079018691699757	-4.6209096292678	3.82061183465886e-06	1.06663939817416e-05
B3GNTL1	85.5403988070887	0.167177258896341	0.0551898238965558	3.02913195029735	0.00245257537902379	0.00467592700591605
B4GALNT1	670.868506072486	0.154372413858959	0.0905021334881816	1.70573231711845	0.0880579297657152	0.128202081757126
B4GALNT2	0.0532377856286013	-0.295223855816784	2.89081430390498	-0.102124808023119	0.918657610003527	0.992959537955552
B4GALNT3	32.5695389966338	0.0328020265365943	0.125742438442435	0.260866792014783	0.794195234486695	0.886617886398832
B4GALNT4	1810.61290635898	0.395878324156547	0.067937691233995	5.82707944538532	5.64057647246968e-09	2.17757889508856e-08
B4GALT1	489.709490723162	-0.572855912676396	0.0672363799194913	-8.52002908785887	1.59513253971258e-17	1.512532950108e-16
B4GALT2	1426.54965563256	-0.115579962618296	0.0433933287603437	-2.66354220614488	0.00773227112913172	0.0136242174343858
B4GALT3	657.555546788319	0.0433605948430008	0.032263438278283	1.34395455527713	0.178963082793308	0.243562519689316
B4GALT4	503.98661847845	-0.236137725924358	0.0405761910763266	-5.81961292227175	5.89840635248272e-09	2.27088067765739e-08
B4GALT5	2113.27777605699	-0.191263061631419	0.046135720680261	-4.14566108020612	3.38834700184887e-05	8.28875490634957e-05
B4GALT6	349.032244946378	0.329799759665839	0.0839820354349212	3.92702746436058	8.60021639769661e-05	0.000200848570160942
B4GALT7	519.459342263004	-0.0467134824739273	0.0362436076776879	-1.28887507251892	0.197441521427305	0.266062181633112
B9D1	190.510282026853	-0.250579858074107	0.0454660746968398	-5.51135895818875	3.5607369847894e-08	1.25704999185042e-07
B9D2	78.3818958400899	-0.61063568988289	0.0667174522771536	-9.15256307069736	5.55984669454537e-20	6.70211770864211e-19
BAALC	12396.6012034323	0.183275698722888	0.0617543274672601	2.96781952358001	0.00299920374752018	0.0056357688791732
BAAT	10.5073297904587	-0.0749938153716303	0.106952407855894	-0.701188658348633	0.483185286876029	0.586912401095559
BACE1	3578.14545386463	-0.0880805384947418	0.0440987714524639	-1.99734676485688	0.0457875265205081	0.0704657540111174
BACE2	155.790622535701	-0.901615102624879	0.0776498753955916	-11.6112884667432	3.61132377110047e-31	1.38036715406044e-29
BACH1	660.565143216407	-0.121348842931695	0.0426505915578018	-2.84518545932095	0.00443855719664004	0.00812318691110629
BACH2	247.007150511403	0.191187099105413	0.0529707087277318	3.60929849151368	0.000307026165305906	0.000664593145375715
BAD	1317.77118515416	-0.135282413004577	0.0505738188090186	-2.67494953298747	0.00747405001921748	0.0132082480140314
BAG1	1429.02957431933	0.105942010885145	0.0422728623341064	2.50614708906686	0.012205483336568	0.0208009346403691
BAG2	135.142012069549	0.0913553072406301	0.0567597750954485	1.60950791448706	0.107505325815989	0.153640361455477
BAG3	1589.16624822875	-0.284119993465342	0.0807596381475941	-3.51809393878278	0.000434658466182558	0.000921513398686447
BAG4	171.541565041561	0.269072512073471	0.0700566494521812	3.840784767435	0.000122641610798543	0.000279972180049787
BAG5	1125.78553661124	0.03696992425871	0.0293493779807598	1.25964932827353	0.207795892325808	0.278509031145471
BAGE	0.0229620251443832	0.0868921487120269	2.89081430390498	0.0300580181143599	0.976020782280979	0.999988810474289
BAGE2	4.65835468617171	0.549743008119245	0.117109395985501	4.69426900799069	2.67561752037051e-06	7.58926958047457e-06
BAHCC1	1056.84896517534	0.297272223220597	0.0522775521069998	5.68642201555558	1.29728584438252e-08	4.81558963731281e-08
BAHD1	855.235383193355	0.1208871848437	0.0287911845818104	4.1987568972787	2.68384257933506e-05	6.66895243299806e-05
BAI1	3255.32125729138	0.574293418656684	0.102117096911125	5.62387137930982	1.86724700843075e-08	6.81564201019085e-08
BAI2	3446.9626192639	0.118619078086382	0.0574652174767528	2.06418914423092	0.0389997863884753	0.0607690991958586
BAI3	1241.96326512795	0.694437930336422	0.0652093270855504	10.6493650735786	1.75558358460491e-26	4.06094745745567e-25
BAIAP2	1563.98261647999	-0.0162998148917279	0.0637948435964121	-0.255503642188483	0.798334130886679	0.890291311515791
BAIAP2L1	13.0599248782281	-0.23727322338693	0.0880207099673627	-2.69565223314955	0.00702509686212483	0.0124663329785385
BAIAP2L2	46.2461672190567	0.41489629701183	0.0926466968502431	4.47826324215833	7.52527695054731e-06	2.01352557797368e-05
BAIAP3	1705.01245267758	-0.381167552063325	0.109074077781503	-3.49457506142642	0.000474817073182677	0.00100233502258456
BAK1	220.61511079551	-0.205088490289697	0.0338480709503476	-6.05908947043233	1.36894236940887e-09	5.65413985350685e-09
BAMBI	371.330425291004	-0.09936625424391	0.0776826899141348	-1.2791299368462	0.200851303064454	0.270157839860086
BANF1	2451.93350041313	-0.0745959537644033	0.0414033677550329	-1.80168807053952	0.0715944960246055	0.106100854795179
BANF2	0.0460820247439627	-0.131524291312616	1.45923432961791	-0.0901323993296228	0.928182003050133	0.999850209589683
BANK1	13.9355729406528	-1.87327522187868	0.166017063840857	-11.2836306012157	1.58084239914518e-29	5.01109221049482e-28
BANP	229.182681546992	-0.0029691740895314	0.0337551203233514	-0.0879621835469317	0.929906732753057	0.999988810474289
BAP1	2673.50822690253	0.25025811696957	0.0328486332704651	7.61852448803653	2.56591815106862e-14	1.76362076828861e-13
BARD1	89.6563360493089	-0.29135018830457	0.0955285638615136	-3.04987510046666	0.00228936551834957	0.00438728195372968
BARHL1	12.684976292785	1.41382294367806	0.282349930129259	5.0073429911274	5.51865353619162e-07	1.70033956581518e-06
BARHL2	0.319416646668925	-0.0800507254644	0.728305420484084	-0.109913675242445	0.912477836982591	0.988589065147316
BARX1	2.16101731286104	-0.259004192780825	0.340909053614892	-0.759745715270471	0.447406596939472	0.549385494401691
BARX2	10.1004117292894	-0.100453565534046	0.186753685759146	-0.537893349337159	0.590650680170864	0.697394352157117
BASE	0	NA	NA	NA	NA	NA
BASP1	2880.40598470501	0.400570651199813	0.0811478618263146	4.93630567934343	7.96162874380835e-07	2.40855481515088e-06
BAT1	5119.67180912846	0.137754146681788	0.0299368472132224	4.60149145635301	4.1947636683855e-06	1.16317682507633e-05
BAT2	9024.96510599589	0.162647345641767	0.027597451979439	5.89356386100226	3.77953935737646e-09	1.49009077208002e-08
BAT2L1	7361.67346222102	0.214198760063903	0.0354295597685808	6.04576408690959	1.48703553943496e-09	6.11879067595675e-09
BAT2L2	3216.16882799425	0.103711503056616	0.0342493706614894	3.02812872334707	0.00246073245008001	0.004689661949833
BAT3	4642.76547548591	0.125340556640925	0.0251137932212329	4.99090501927656	6.00970453709217e-07	1.84499428903087e-06
BAT4	609.282830773501	0.0986804708061727	0.039778966296168	2.48071983750062	0.0131117383544282	0.0222561498238268
BAT5	1115.53018311471	-0.000378814826715697	0.0216606974746727	-0.0174885793570884	0.986046843807314	0.999988810474289
BATF	12.4371922418454	-1.75015589684364	0.143165148148743	-12.2247342979403	2.29330297945741e-34	1.28981911858912e-32
BATF2	113.273176352261	-0.556215138528922	0.100126991552705	-5.55509688150514	2.77457828811612e-08	9.93046792755741e-08
BATF3	56.5868738106001	-1.09818112156258	0.103877257418843	-10.5719110116145	4.02213868263173e-26	9.00748577560929e-25
BAX	644.804786211685	-0.440121917044173	0.0521786742101506	-8.43490034399062	3.31485144970675e-17	3.05205101905881e-16
BAZ1A	527.890788775841	-0.0127668385545897	0.0600677399976732	-0.212540684152329	0.831685241364321	0.919501487012449
BAZ1B	2476.71765782429	-0.0865312634678024	0.0319626594778455	-2.70726106279674	0.00678408858826778	0.0120767574480061
BAZ2A	1860.55222007617	0.356753479575749	0.0351815218139816	10.1403652025641	3.65729717343815e-24	6.55085485524386e-23
BAZ2B	1098.11735114627	0.211738294618133	0.0413936270697917	5.11523897775695	3.13343984008913e-07	9.95188177672709e-07
BBC3	125.843016366668	-0.222281535734702	0.0619279055714097	-3.58935981580043	0.000331491033024713	0.000715093072839534
BBOX1	1092.27374244224	-0.253756880359273	0.0862029618937088	-2.94371416926675	0.00324299354930862	0.00606367097436742
BBS1	1323.06111315968	0.0243263649039564	0.038527840479003	0.631397052145029	0.527780943000498	0.633073418010164
BBS10	656.289695124446	0.162462280828211	0.0382709062083097	4.24505967911821	2.18535249754572e-05	5.49408223680554e-05
BBS12	110.542403196327	-0.362105880469821	0.0454714545145861	-7.96336700321883	1.67419946238606e-15	1.30314813827875e-14
BBS2	2802.0114533511	0.148086513030379	0.0388025759925971	3.81640932959275	0.000135407801489373	0.000307333399321838
BBS4	449.004799921029	-0.234003483887143	0.0356247049437775	-6.56857324871729	5.07996421086129e-11	2.4569802331893e-10
BBS5	326.085891663651	-0.185950716998963	0.0370145051635858	-5.02372559560511	5.06786319546482e-07	1.56635087145117e-06
BBS7	314.292824067517	0.0374424486513697	0.0439562180219385	0.851812333642587	0.394318259773168	0.491229573154638
BBS9	376.37439061458	-0.254767809685345	0.0374438994585016	-6.80398712125855	1.01762640188225e-11	5.31211236304751e-11
BBX	2001.29336632132	0.0380842481724497	0.044237558895237	0.860903022760376	0.389291456708013	0.485689081334595
BCAM	669.396570283163	-0.387751473448382	0.0696763774838779	-5.5650349149983	2.62099926276364e-08	9.42018814816545e-08
BCAN	75896.4650307199	0.535558761277081	0.080470284688855	6.65536058866777	2.82606321337419e-11	1.4034070220805e-10
BCAP29	1603.3106060842	-0.215367408405764	0.0382383229837584	-5.6322398996745	1.77884003521286e-08	6.50984682899519e-08
BCAP31	3313.96194290207	-0.178835970152101	0.0334328628628251	-5.34910728063775	8.83891380535483e-08	2.99193033108548e-07
BCAR1	2362.1873420301	0.299712992297275	0.0507479966383609	5.90590786140943	3.5070995653367e-09	1.38768351645534e-08
BCAR3	381.615878272919	-0.420579131681971	0.0747202032686969	-5.62872038998009	1.81551423832066e-08	6.6354247644527e-08
BCAR4	0.0567329635998179	0.0101892371620363	0.928999266568895	0.0109679711585442	0.991249000601893	0.999988810474289
BCAS1	3144.00315182946	-0.389397961913245	0.124208836675938	-3.13502623753887	0.00171838741571938	0.00335546635040532
BCAS2	651.937935747298	-0.335813826692103	0.0332008928372405	-10.1146022891117	4.7594608785341e-24	8.39516016074765e-23
BCAS3	785.896916257584	-0.033766437549023	0.0323208469904619	-1.04472625853486	0.296149505069557	0.381624967746415
BCAS4	439.708292201482	-0.605916640098444	0.0645273946631042	-9.39006825336616	5.99613886935523e-21	7.91643149854177e-20
BCAT1	621.29056258156	-1.24125337740476	0.122907386503431	-10.0990950399073	5.57543022449281e-24	9.76444341362465e-23
BCAT2	298.197281568434	-0.368002423553064	0.0629310409036617	-5.8477091474845	4.98388998572202e-09	1.93850769351784e-08
BCCIP	1110.75715838868	0.21457068685904	0.0376154724149426	5.70431987380283	1.16808541623438e-08	4.35736760301527e-08
BCDIN3D	195.550202354226	0.0254991471272062	0.0301132809466038	0.846774125091872	0.397121033183016	0.49416811951577
BCHE	1736.49414976962	0.312150282853406	0.066662822697359	4.68252423499271	2.83363673545978e-06	8.01784377425986e-06
BCKDHA	1065.90714487208	0.00493355230682847	0.0428400534574293	0.115162141702998	0.90831660552101	0.985461440679072
BCKDHB	647.320729882458	-0.175577399810193	0.0506972806872626	-3.46325083771813	0.000533690618808573	0.00111965254516112
BCKDK	914.196333344342	-0.108109119595735	0.0282045144930896	-3.83304309748792	0.000126567768839217	0.000288399876096768
BCL10	193.288957616893	-0.388991406350671	0.0356948576943359	-10.8976875515712	1.18223709862612e-27	3.06618409571215e-26
BCL11A	148.492808599369	0.0120106932611964	0.157981352569907	0.0760260186776265	0.939398398186888	0.999988810474289
BCL11B	118.018344700658	0.26460358507681	0.0976482088955291	2.70976383560605	0.00673311309580695	0.0119946906145665
BCL2	730.57665482066	-0.0393647127075091	0.0569359182384028	-0.691386279969714	0.489322823822317	0.593086619478006
BCL2A1	42.1567662581073	-1.30108352824499	0.146830904445741	-8.86110136797384	7.92277856990472e-19	8.48530446945454e-18
BCL2L1	2545.16504587338	-0.289576669472717	0.0408782514160435	-7.08388102332251	1.40172264736079e-12	8.00722876183897e-12
BCL2L10	0.630440194222272	0.24905242249611	0.260955329052802	0.954387187263442	0.339887689465555	0.431304971876855
BCL2L11	452.790097390182	0.162026785128427	0.0598430195060104	2.7075302427237	0.00677858944073801	0.0120691509715022
BCL2L12	56.1678602248159	-1.10123275811284	0.0852410161495221	-12.919047752565	3.51464184472023e-38	3.00807498753555e-36
BCL2L13	1351.23725320839	0.015546994284439	0.0287643446226847	0.540495342006786	0.588855472446815	0.695733747981247
BCL2L14	1.91476774603941	-1.01720744852248	0.161359319684365	-6.30398944735412	2.90080252657326e-10	1.28753771669886e-09
BCL2L15	10.1948381934642	-0.0610205448194839	0.0769406138311194	-0.793086274999324	0.427727558746754	0.527921311300386
BCL2L2	1778.91304044863	0.173791915285586	0.0584057065730074	2.97559819892505	0.00292417712998415	0.00550204806000172
BCL3	121.482940864657	-0.660348424706467	0.079844982693225	-8.27038096111327	1.33531640721697e-16	1.15440067966913e-15
BCL6	2634.41061530425	0.137111427771686	0.0555713636578313	2.46730363890151	0.0136134864123992	0.023044241123749
BCL6B	153.182684151595	-0.192116800894191	0.0817508900876773	-2.35002702341402	0.018772048148159	0.0310579734238115
BCL7A	1294.20833906897	0.612899694207078	0.0586953176441028	10.4420543036052	1.59324958928099e-25	3.31884848306839e-24
BCL7B	1005.77952763671	-0.17821734904092	0.0294629510088901	-6.04886282392912	1.45871794517283e-09	6.00855048142441e-09
BCL7C	589.030044473248	-0.13689938214617	0.0602287847962385	-2.27298927928427	0.0230268259977841	0.037498599418132
BCL8	3.04058154857858	0.918954974923722	0.148387294122407	6.19294920335741	5.90487636580186e-10	2.53351114343526e-09
BCL9	870.231470758114	0.178210605664089	0.0326256775049626	5.46228061124499	4.70056269447611e-08	1.64177744217108e-07
BCL9L	1439.50616513383	0.32125854702608	0.0410834902951882	7.81965078229262	5.29700789722465e-15	3.88782999466321e-14
BCLAF1	3120.8982799339	0.097519469906973	0.0286261145905168	3.4066610611305	0.000657627369895225	0.00136410903860775
BCMO1	41.8720950253968	-0.928621282210373	0.107095461113836	-8.67096768203187	4.28463319557161e-18	4.28790058235013e-17
BCO2	53.7094853704574	-0.770139976890014	0.091015747141094	-8.46161242511289	2.63705672001385e-17	2.45904602242883e-16
BCOR	681.797717346191	0.11676598692313	0.057793334003434	2.02040579483079	0.0433413128405862	0.0670312494710041
BCORL1	327.935828670375	0.0530862887024513	0.0488671431552391	1.08633910793207	0.27732899079875	0.360392209128162
BCORL2	0.960569944343283	-0.258113535984646	0.259824675276714	-0.993414254091743	0.320508117970952	0.409635261800947
BCR	4967.45684121263	0.490801587457044	0.0581101472531539	8.44605650918232	3.01307886486554e-17	2.78986159242136e-16
BCS1L	427.375686193128	0.056323708132039	0.0314189190139682	1.79266855447824	0.0730259374739941	0.108010788126499
BCYRN1	0	NA	NA	NA	NA	NA
BDH1	299.594148075942	-0.199969348326473	0.102031238322998	-1.9598835769633	0.0500093995935114	0.0763957031660928
BDH2	1101.17380174798	-0.434756101758841	0.0712725391836131	-6.09991038257831	1.06127949562723e-09	4.43981975425865e-09
BDKRB1	1.011639612009	-1.65811032964149	0.224148083044184	-7.39738795497369	1.38889336306351e-13	8.86235521941819e-13
BDKRB2	31.1468936668878	-1.40861598533278	0.13979652765171	-10.076187220059	7.04053137062598e-24	1.22215925953062e-22
BDNF	61.7095485462422	0.180098202528452	0.162680159130946	1.10706925472999	0.26826398707642	0.349766630388086
BDNFOS	290.488793741745	0.199848311905048	0.0506239439179912	3.94770332846438	7.89044969930655e-05	0.000185239716554382
BDP1	810.769675545812	0.340749954280507	0.0416003609836611	8.19103359257722	2.58992284334513e-16	2.18247564945414e-15
BEAN	56.8876759233741	0.263731375082865	0.114422795215494	2.3048849190074	0.0211730194481776	0.0347007649519088
BECN1	1350.17365902847	-0.074599683358053	0.0195396434153105	-3.81786308851469	0.000134612589650529	0.000305669492129503
BEGAIN	189.677567616246	0.220106556219544	0.12478955845736	1.76382190097062	0.0777619689978965	0.114311430044328
BEND2	0.102663272950742	-0.0666881709692748	0.815856306454358	-0.0817400937416246	0.934853394823367	0.999988810474289
BEND3	123.372173911039	0.0947980649215812	0.0504257273326365	1.87995433950292	0.0601143011277004	0.0905701344022054
BEND4	44.8552916966491	1.04238322816872	0.13313425670549	7.82956433575626	4.89563425254613e-15	3.60533334311151e-14
BEND5	232.52253155397	0.0323270713798222	0.0443352841910817	0.729149975457357	0.46590992737625	0.568559724778469
BEND6	511.273222023337	0.0472081972618215	0.0551031167811386	0.856724628650778	0.391597088767557	0.488194344039858
BEND7	365.063750025248	0.337125332342399	0.0516685616661122	6.52476712088366	6.81072697309258e-11	3.24779942987712e-10
BEST1	521.265629811374	0.0465855513444922	0.0896175522376492	0.519826196780692	0.603184718808828	0.709597274233657
BEST2	0.350624833614337	-0.03670359920384	0.298980203835135	-0.122762640245169	0.902295059189711	0.980603888927813
BEST3	739.110288393382	0.553729179083005	0.109173074557854	5.07203063874114	3.93592998290744e-07	1.23531220844281e-06
BEST4	11.6062790029648	-1.16510216159881	0.129348289624555	-9.00748023016482	2.10845052606866e-19	2.39358988498625e-18
BET1	327.408773052846	-0.30930582408184	0.0313519507566117	-9.86560059637156	5.86821978255453e-23	9.45302016526889e-22
BET1L	976.449241625024	-0.0402655961412811	0.0302421248742573	-1.33144070757925	0.18304404244141	0.248566637379909
BET3L	0.144534158339942	-0.274389541020388	0.451165014630137	-0.608180005369725	0.543068094262952	0.648407559626749
BEX1	3505.78438022547	0.490725330920043	0.0697254812531729	7.03796262284976	1.95070994699144e-12	1.09556990888806e-11
BEX2	1073.63897868083	0.247501207687057	0.0882058798132046	2.80594908424694	0.00501686188905913	0.00911551445593607
BEX4	2911.5820861154	0.168235361562093	0.0442246694365653	3.80410670572462	0.000142316827379184	0.000322091160202861
BEX5	232.511557902864	0.323828060317298	0.141439743669488	2.28951249426759	0.0220495928047534	0.0360294043630424
BEYLA	0	NA	NA	NA	NA	NA
BFAR	791.565485434143	-0.0305782086344949	0.0228554827951827	-1.33789379592278	0.180931059858526	0.246002756825189
BFSP1	18.5991891189436	-0.193246096243478	0.121368156532771	-1.59223062922027	0.111332893453823	0.158592373372784
BFSP2	0.223615363685191	0.237441331907547	0.388664695356942	0.610915616324466	0.541255445864714	0.646388733805293
BGLAP	60.6024080306512	0.0799214939965685	0.0617279301004244	1.29473795519379	0.195410641872948	0.263541962542408
BGN	2075.8580003512	-0.870886561247517	0.103527169900375	-8.41215462651574	4.02546731386877e-17	3.67027902146858e-16
BHLHA15	1.67590096017798	0.601793046874887	0.206743010826277	2.91082655935858	0.00360474055306226	0.00668966872624187
BHLHB9	335.916154931911	0.207085636421319	0.0669319905299667	3.09397098131427	0.00197496802683139	0.00382876163168958
BHLHE22	30.6834096680635	0.0226913874272721	0.184711222862468	0.122847908619866	0.902227535958062	0.980584642520674
BHLHE23	0.0635282797538661	0.0537374049521719	2.21466635971645	0.0242643343167284	0.980641761841832	0.999988810474289
BHLHE40	1228.72925935888	-0.486957672783407	0.0913618652930339	-5.32998829677502	9.82190958055555e-08	3.30616091130705e-07
BHLHE41	1908.3889012652	-0.727753374981084	0.0800563941870725	-9.09050903892199	9.85764387679043e-20	1.15642264430643e-18
BHMT	3.74701472303065	0.0955090641763306	0.185607755837772	0.514574747942154	0.606850214767418	0.713227445083087
BHMT2	42.2349026598612	-0.628441217930267	0.11566742360593	-5.43317382144968	5.53604321614122e-08	1.91692191222058e-07
BICC1	27.341504870968	-0.346109078772105	0.123683010374183	-2.79835587543517	0.00513634862843763	0.00931622802458258
BICD1	214.367001990833	-0.309909808747959	0.071137980371824	-4.35646060132889	1.32182472623244e-05	3.42642570695067e-05
BICD2	1125.6112137076	0.130378861271901	0.0285905770407549	4.56020391215085	5.11039720299542e-06	1.40128386879739e-05
BID	1367.81896340152	0.424265728781694	0.0550069835912306	7.71294299528419	1.2294901374337e-14	8.74052486651584e-14
BIK	1.62632799786802	-0.739114002899265	0.154963603262059	-4.76959742378569	1.84594451700755e-06	5.350032069684e-06
BIN1	3739.04932900029	-0.270867450123902	0.0635942153813884	-4.25930956926587	2.05059312196645e-05	5.18043193094322e-05
BIN2	201.83506914181	-0.70127976925532	0.0854218053303259	-8.20961072577983	2.21906745935356e-16	1.88367153675613e-15
BIN3	319.315559251879	-0.248714713645905	0.0355198940992313	-7.00212430113321	2.52110245074898e-12	1.39954601644088e-11
BIRC2	1092.619741322	-0.0422920701585446	0.025121232804241	-1.68351889766353	0.0922746841987176	0.133796932708585
BIRC3	48.7064500927735	-0.996054454664676	0.108183722756458	-9.2070639582905	3.35166992235365e-20	4.1417214326134e-19
BIRC5	134.857908220268	-0.930857262928334	0.159276011927813	-5.844302928367	5.086938525547e-09	1.97616526420565e-08
BIRC6	1881.25649826176	0.332721558196944	0.0441539785440231	7.53548307917957	4.86530280567514e-14	3.25981911945933e-13
BIRC7	11.7652101495121	-0.215081771839703	0.132438486871027	-1.62401260329376	0.104373118744907	0.149652912993917
BIRC8	0.00204080986845379	-0.000130844374231799	2.89081430390498	-4.52621166482576e-05	0.999963886055949	0.999988810474289
BIVM	741.910114443133	0.326131555686063	0.0441347261223731	7.38945461634433	1.4743227698617e-13	9.36497054686269e-13
BLCAP	2659.96748137088	0.149021198310942	0.0385628279939618	3.86437421898301	0.000111374362769675	0.000255823142487871
BLID	0.0130950194970507	-0.0220707727840656	2.70792049661858	-0.00815045080223948	0.993496953140792	0.999988810474289
BLK	4.83648578775153	2.0802655255101	0.22777330285616	9.13305246674937	6.65945716120228e-20	7.95940584203199e-19
BLM	321.333207917234	-0.042196332938767	0.115159604605749	-0.366416097756041	0.714054609477872	0.814708455779976
BLMH	842.114755073371	0.0647348763653667	0.0343062229537126	1.88697183169099	0.0591641144463306	0.0892585524889652
BLNK	123.015734016817	-0.953465116612346	0.106837301978518	-8.9244589572663	4.47883052894929e-19	4.91174256057754e-18
BLOC1S1	1373.9056399187	-0.274678736691807	0.0554028385248788	-4.95784591557455	7.12790574075817e-07	2.16900331591938e-06
BLOC1S2	1037.92555816582	0.0363338240851134	0.0347123696683655	1.04671114165466	0.29523282348812	0.380667985220648
BLOC1S3	276.757607521508	-0.167780985089353	0.0308705025819011	-5.43499363653769	5.47983880538125e-08	1.89846228236413e-07
BLVRA	804.4471494895	-0.045962490997014	0.038427878016823	-1.19607153371551	0.231668645115229	0.307262988754433
BLVRB	521.331989900128	-0.557076980143969	0.0724910107973072	-7.68477324314896	1.53268219558344e-14	1.07868605720629e-13
BLZF1	306.436885399837	-0.0882977291783464	0.0297588873985261	-2.96710451556464	0.00300618750538376	0.00564718017401273
BMF	263.90560869487	-0.390334235386053	0.0910448147529804	-4.28727584810946	1.80877625303041e-05	4.60796693942068e-05
BMI1	1484.77000266805	-0.0218059058539688	0.0350015577968173	-0.622998152840832	0.533285735685764	0.638509196945093
BMP1	627.136434201708	-0.270401266136239	0.0513861349776678	-5.26214447250712	1.42384810738727e-07	4.6996059681285e-07
BMP10	0	NA	NA	NA	NA	NA
BMP15	0.0623893929844237	0.108307420429715	0.853231238611791	0.126937945457707	0.898989513417733	0.978091448163824
BMP2	1367.34554990589	0.959949373647275	0.103713615578953	9.25577001909166	2.12691749626983e-20	2.66507771572702e-19
BMP2K	437.247756014485	-0.250415001955352	0.0709126218308411	-3.53131777517274	0.000413494660190796	0.000879011056787886
BMP3	3.4514707617947	0.173031680921047	0.217388122845422	0.795957381002292	0.426056807496804	0.526156101353487
BMP4	139.216743550731	0.205498497163972	0.0873165163081887	2.35348941818354	0.0185981372124343	0.0307961247498965
BMP5	1.27087542575625	-1.23514886696515	0.493784632578371	-2.50139187304319	0.0123706211253879	0.0210726615483958
BMP6	123.056037274819	0.110096763755935	0.0976259384726779	1.12774090040371	0.259429359014565	0.339439477048967
BMP7	2884.34945895556	0.212513940723628	0.0583968744864697	3.63913210411401	0.000273558447508699	0.00059555386410183
BMP8A	159.702929736569	-0.15172580335185	0.0852058082023076	-1.78069789551906	0.0749618171422268	0.110566714404671
BMP8B	136.595082091273	-0.179688003225032	0.124219756034863	-1.44653321629936	0.148027702432464	0.205191558508771
BMPER	218.01662491336	0.482603151564372	0.109804517492445	4.39511199161345	1.10715658871725e-05	2.90166122339222e-05
BMPR1A	738.359612499872	0.133682621997076	0.0480660741133271	2.78122614470005	0.00541539989225455	0.00979709097316707
BMPR1B	964.056824003198	-0.179044186020916	0.0798744870765857	-2.24156914897298	0.0249892317501023	0.0404301000247197
BMPR2	2843.02402326603	0.233861421513959	0.0393975750786584	5.93593440832458	2.92176601644195e-09	1.16615904366707e-08
BMS1	844.963194876337	0.107396560776341	0.026277314721496	4.08704473476834	4.36902900041249e-05	0.00010565643227656
BMS1P4	15.7109921384798	0.413946232765861	0.0782910751060413	5.28727230026146	1.24153757263125e-07	4.13111344104905e-07
BMS1P5	69.0048917907803	0.721341243534239	0.0684570202148435	10.5371405484843	5.82429076773751e-26	1.27816236079056e-24
BMX	2.69883881652968	-0.300018841281566	0.186139545555514	-1.61179528179352	0.107006495247017	0.15300521965116
BNC1	1.73913105267331	0.693826280207879	0.23001986889347	3.01637542680808	0.00255816308602717	0.00486310384823224
BNC2	67.218374569187	-0.463262480173359	0.101402603857081	-4.56854619656799	4.91118830997637e-06	1.35098856738241e-05
BNIP1	210.779456087965	-0.0487669880043149	0.0340613582753137	-1.43173938074159	0.152218421563425	0.21055580271773
BNIP2	484.085082685927	-0.161097711900932	0.032192006211645	-5.00427686431848	5.60721194716253e-07	1.72627411917258e-06
BNIP3	1658.36801360369	0.178106515586826	0.0522675252933354	3.40759419136945	0.000655382843623377	0.00136002648921845
BNIP3L	3493.46031122475	-0.00628149332146747	0.0297328606386063	-0.211264344787307	0.832681003722887	0.920292266480548
BNIPL	5.81167322741469	-0.121431481414185	0.0825402916061916	-1.47117824581414	0.141242918723201	0.196784404775017
BOC	991.85949498021	0.0484838215253368	0.0773967755863587	0.626432059449802	0.531031586879986	0.636348059956954
BOD1	774.388410846811	-0.064306339795619	0.0299365498852007	-2.14808787392729	0.0317067753459833	0.0502736909130633
BOD1L	1423.7539065554	0.255384637588395	0.0400660775451771	6.3740863402571	1.84056883622669e-10	8.35599574287877e-10
BOK	755.061527547047	-0.649760584267478	0.125634132846154	-5.17184756680056	2.31790641463694e-07	7.47387187094646e-07
BOLA1	306.064298563036	0.00504831104169529	0.0446091878284871	0.113167517442931	0.909897747521971	0.986815847240489
BOLA2	756.347264852725	-0.0413317651563954	0.043290556203462	-0.954752462919155	0.339702892237194	0.431144515389372
BOLA3	157.574957412331	-0.431764899602381	0.0409843087390241	-10.5348830537007	5.96573814897866e-26	1.30774560648825e-24
BOLL	0.0182885168047006	-0.0330395249257974	2.39681820236684	-0.0137847438296201	0.989001714039008	0.999988810474289
BOP1	553.386190556368	0.289953223496522	0.0763525361957096	3.79755850877439	0.000146128291627544	0.0003301429382174
BPESC1	0.00945919931178434	-0.000213239027649644	2.89081430390498	-7.37643463855824e-05	0.999941144566935	0.999988810474289
BPGM	672.979970273891	-0.260340185852238	0.0365398879099523	-7.12482168784457	1.0421551644774e-12	6.04087880233732e-12
BPHL	316.219780549923	0.0131889467319655	0.0392986964813449	0.335607740532215	0.737166686144116	0.835605563557924
BPI	2.91825958380504	0.295478699174662	0.18884310380636	1.56467826051856	0.117658368354961	0.166830294681799
BPIL1	15.8017980382622	0.54432824626535	0.254277256993703	2.14068789596401	0.0322992152608251	0.0511265722426296
BPIL2	0.16587706359422	-0.0455300463483929	0.666293564914898	-0.0683333124404528	0.945520306601834	0.999988810474289
BPIL3	0.064573024721173	-0.153547674666829	1.26809276787173	-0.121085521940585	0.903623296611906	0.981668023940693
BPNT1	536.761269363	0.00221171048981776	0.0254767646366625	0.0868128477599147	0.930820275145885	0.999988810474289
BPTF	2271.08770599737	0.295684628186387	0.0400598000101249	7.38108098671622	1.57009458780216e-13	9.93165551442338e-13
BPY2	0	NA	NA	NA	NA	NA
BRAF	117.038775564802	0.295888498688301	0.0670801072279262	4.41097235701972	1.02907456339873e-05	2.70602895812235e-05
BRAP	711.251723271408	0.107535846595122	0.0239240828253485	4.49487854477679	6.96096671784152e-06	1.87118161737963e-05
BRCA1	230.716663858604	-0.662912104988496	0.0619466237025234	-10.7013435981902	1.00312994369615e-26	2.37624704472428e-25
BRCA2	47.1585991239243	-0.769740874335382	0.116950762492381	-6.58175165284216	4.64937735128645e-11	2.26151173909968e-10
BRCC3	315.272104752865	0.0250090296683317	0.028038929380302	0.891939536247099	0.372425341767929	0.466954958770808
BRD1	833.563048826223	0.205322171558692	0.0287792409966667	7.13438452329139	9.72211950429106e-13	5.65543506034189e-12
BRD2	4854.68935867574	0.175736438185914	0.0255894766428068	6.86752764188765	6.53240980468966e-12	3.46698536007862e-11
BRD3	1715.25407441961	0.311544466807839	0.0387271202170671	8.0446071141262	8.65225534308849e-16	6.9207495501299e-15
BRD4	1664.23246462505	0.0417199470809624	0.0310970489792923	1.34160470045707	0.179724201317844	0.244448028103822
BRD7	1558.70394218589	0.0558669944471108	0.0257919371154653	2.16606430905153	0.0303062730707284	0.0482630034299239
BRD7P3	0.616866249161155	0.125866744357207	0.18746498660089	0.671414681959653	0.501956394387603	0.605788217982954
BRD8	1581.36847656372	0.264886694800093	0.0274721646163289	9.64200304196816	5.31407575714522e-22	7.83577387860701e-21
BRD9	979.534210878338	0.166117341888948	0.0293166852978282	5.66630709445363	1.45907925470856e-08	5.39379814627944e-08
BRDT	0.0522537237200163	-0.000658158285270823	1.09186592801482	-0.000602783060066223	0.999519048731985	0.999988810474289
BRE	564.07265794538	-0.0613543945796981	0.0281909873939546	-2.17638331436575	0.0295266103973927	0.0471014040253384
BREA2	7.21225263464678	0.223200924615052	0.0855646592342676	2.60856440746115	0.00909228993339671	0.0158348869626572
BRF1	1210.33327361331	0.137937864120692	0.0356163697993617	3.87287825507596	0.000107557562620137	0.000247836898065949
BRF2	357.846864999958	-0.019289184758228	0.0271495087971621	-0.710480064384966	0.477406489120269	0.580860791045954
BRI3	975.117977142296	-0.270347670331931	0.0466803288372055	-5.79146884921806	6.97735013974299e-09	2.66387000583477e-08
BRI3BP	68.0308975691985	0.197246724109573	0.0618449383667276	3.18937538493354	0.00142580596973199	0.00281797093515805
BRIP1	33.7218786704613	-1.01424902698344	0.146744252002833	-6.91167805989333	4.78953851127174e-12	2.57883111582013e-11
BRIX1	429.928731730902	-0.118820590789988	0.0305591120969205	-3.88822130738417	0.000100981532294713	0.000233586540919086
BRMS1	735.100235680889	-0.0868215483635775	0.045792244800004	-1.89598803777294	0.057961626330012	0.0875786470913636
BRMS1L	456.787589668366	0.252607807327007	0.0387429189088627	6.52010262626912	7.02593034209396e-11	3.34636919390563e-10
BRP44	755.636543180718	-0.1210375187093	0.0297755121660229	-4.06500207400015	4.80320348582361e-05	0.000115588093665572
BRP44L	1367.39982467112	0.0153830930106472	0.045396951493936	0.33885740131035	0.734717156635356	0.833548915242175
BRPF1	570.862539704953	0.0823107771558447	0.0248883507509111	3.30720094632352	0.000942332682217255	0.00191128993816588
BRPF3	1162.09468123237	0.488898726108667	0.0458283204252743	10.668048088427	1.43611463290538e-26	3.35747227419744e-25
BRS3	0.173111745623234	0.205312666728896	0.41912284588652	0.489862742496471	0.624231028906123	0.729907205465817
BRSK1	1409.10224439156	0.228124737025274	0.0757087145105736	3.01318994121097	0.00258517059052192	0.00490639057794293
BRSK2	900.289872747527	0.689549929145605	0.0723566289965438	9.52987913766051	1.57466449856988e-21	2.20464229405035e-20
BRWD1	1734.15881844492	0.17978587504934	0.0323378092340758	5.55961827061222	2.70365332197177e-08	9.69071661380451e-08
BRWD3	194.990719453946	0.599759035000572	0.0778799909250639	7.70106708894791	1.34934618414812e-14	9.55119727973956e-14
BSCL2	2393.70720510369	-0.139179415685649	0.0834155738870147	-1.66850636158381	0.0952152501355444	0.137685462346154
BSDC1	2393.84968586159	-0.0718182251979191	0.0274426416350414	-2.61703031920275	0.00886984623855039	0.0154721243425666
BSG	11116.9750603955	-0.114632444076472	0.04035596632235	-2.84053275198087	0.00450382479004665	0.00823345012927826
BSN	1775.81211551488	0.761908931992445	0.106014927061959	7.18680805720083	6.63235453439228e-13	3.93721046470181e-12
BSND	0.0271128215813855	-0.0767542520216646	1.75040124143171	-0.0438495187302797	0.965024354779042	0.999988810474289
BSPH1	0.00571847410154959	0.0216455025606865	2.89081430390498	0.00748768349853784	0.994025748765192	0.999988810474289
BSPRY	28.1781514248101	-0.0133365964016438	0.121738161943944	-0.109551484831723	0.912765088469307	0.988629315359896
BST1	31.8065503326731	-0.951071122297802	0.0925064683383546	-10.2811310320391	8.57157435858428e-25	1.64616040242665e-23
BST2	841.169152539941	-1.10913026032406	0.0962424936991971	-11.5243300302526	9.94830260575885e-31	3.64678467028609e-29
BSX	0	NA	NA	NA	NA	NA
BTAF1	867.342431771319	0.491717634641129	0.0511688809766507	9.60970076452344	7.27601279685103e-22	1.05781618837528e-20
BTBD1	2187.54209992149	-0.0261381748408323	0.0278562615285762	-0.938323141962845	0.348078370422681	0.440457370619562
BTBD10	641.937447561277	0.0692387736039783	0.0428523427680412	1.61575235171543	0.106147867184003	0.151887821873745
BTBD11	262.819479382452	-0.197002677883774	0.1229592056069	-1.60217916919202	0.109115995052251	0.155795195662838
BTBD12	367.726079733902	0.200314344802971	0.0337929890036827	5.92768946189224	3.07226786337327e-09	1.22424277106281e-08
BTBD16	6.00446296855347	-1.03543626403143	0.176920704917085	-5.85254430518292	4.84109224402633e-09	1.88557381922553e-08
BTBD17	737.988566259048	0.85996531150692	0.107919347279044	7.96859259427626	1.6049159515526e-15	1.25219066612417e-14
BTBD18	3.94016889564122	0.480246679103617	0.0639559195696257	7.50902625332117	5.9568779856595e-14	3.952178737705e-13
BTBD19	15.6372992207572	-0.471353165563299	0.0959500603407921	-4.91248430578535	8.99295836570602e-07	2.70682546527405e-06
BTBD2	3028.82394024308	0.138436900008604	0.034173659053803	4.05098265276917	5.1002989048162e-05	0.000122363661110673
BTBD3	1641.44318070707	-0.148065670660423	0.0522849350449475	-2.8318992943787	0.00462724195624052	0.00844495252258434
BTBD6	865.980764636259	-0.0114772185825668	0.0516496310129438	-0.222212983083858	0.82414808772498	0.912911772374443
BTBD7	652.062913846544	0.105632082273223	0.0388539603450196	2.71869537455691	0.00655399369453781	0.0116967693451475
BTBD8	14.4774635543371	0.140725373976221	0.111567195229995	1.26135082706092	0.207182476361815	0.277819281143211
BTBD9	805.292471092684	0.285156052270363	0.0483282443841856	5.90040163684643	3.62617752919537e-09	1.43307176595484e-08
BTC	7.20969766568277	-0.126473350402852	0.183080203157023	-0.690808444725066	0.489685927948509	0.593390815890643
BTD	349.113461117676	-0.0613519859216467	0.0425095866328146	-1.44325058842814	0.148949893461387	0.206368148422536
BTF3	5647.81347671788	0.0715990698819675	0.0380951334174665	1.87948074882288	0.0601788797255027	0.0906505392865412
BTF3L1	0.00778992455624585	0.0107161317665189	2.89081430390498	0.00370695957607629	0.99704228096067	0.999988810474289
BTF3L4	1134.62943580135	-0.123315923570761	0.0358718434759931	-3.43768013074904	0.000586720334210652	0.00122503073599244
BTG1	1954.93807714138	-0.0587430941042592	0.0444946840824574	-1.32022724322296	0.186759158742782	0.253000759744798
BTG2	3536.42814251144	-0.0541779335986272	0.0676469453166547	-0.800892536167315	0.423193861434527	0.52288295018445
BTG3	501.191949684923	-0.431345188528378	0.0504040911561177	-8.55774161649624	1.15099972247927e-17	1.10416323279748e-16
BTG4	0.165613691692644	-0.536409027346161	0.657675231867044	-0.815613849138539	0.414721026035843	0.51354239148994
BTK	170.52178749363	-0.891817019401103	0.0885978602512403	-10.0658979446247	7.81707018147408e-24	1.35337754197289e-22
BTLA	2.82971789288612	-1.02423911489473	0.152695659914596	-6.70771595910189	1.97694260860969e-11	9.99900186291923e-11
BTN1A1	0.818795566539321	-1.65584669371993	0.288857097268786	-5.73240785625958	9.90148276330244e-09	3.72322231510236e-08
BTN2A1	542.474191723736	0.00790622842160513	0.0295343125671062	0.267696375314003	0.788933040101464	0.881793487076841
BTN2A2	226.614503516203	-0.712260038321789	0.0677837174556026	-10.507833814047	7.94985707513683e-26	1.71593132153584e-24
BTN2A3	11.8849877587886	-0.620928602870034	0.0910633804302168	-6.81864213624115	9.19050191143995e-12	4.81541203424795e-11
BTN3A1	616.620627876307	-0.312465960864863	0.060618121763159	-5.15466252956003	2.54088098864459e-07	8.15276972477077e-07
BTN3A2	934.326527428827	-0.645282196161713	0.0821219565792668	-7.85760864743725	3.91536353008382e-15	2.91836164671336e-14
BTN3A3	567.050347889113	-0.276788236119917	0.0696898894062651	-3.97171294829224	7.13576732232387e-05	0.000168567838401471
BTNL2	0.546311619789308	0.124117939647071	0.345546201772813	0.359193471119892	0.719450360471596	0.819771957969632
BTNL3	0.630923275559841	-0.354542368712817	0.268209061709296	-1.32188810643951	0.18620541346199	0.25232006360565
BTNL8	1.90527121077629	0.0415478713986265	0.154449796329371	0.269005672950347	0.787925317149164	0.880967276387669
BTNL9	184.927369125943	0.321603672463561	0.085767459161761	3.74971668283892	0.000177034469385882	0.000395519637936794
BTRC	1144.46074208648	0.307655224777675	0.0447259980720881	6.87866650358043	6.04154086888471e-12	3.21948381169452e-11
BUB1	127.010791275397	-0.932773830239619	0.140109989302007	-6.65743987910118	2.78638321931179e-11	1.38509984020587e-10
BUB1B	121.443846871923	-0.918305689552161	0.147763037599031	-6.21471854175109	5.14167279083967e-10	2.22545797906066e-09
BUB3	1446.41694090216	0.124632361296592	0.0355125766340949	3.50952741561801	0.000448903777693698	0.000950281843628396
BUD13	401.242468307939	0.0426725480101499	0.0318994188540335	1.33772180005575	0.180987141821422	0.2460450198035
BUD31	1216.98755544993	-0.289658188048784	0.0410315796586645	-7.05939645654412	1.67227330447131e-12	9.47573402375295e-12
BVES	214.92731329905	-0.664513309405216	0.100292233136723	-6.62577039738778	3.45441758479312e-11	1.70512061576361e-10
BYSL	382.268527592596	0.0457051294118873	0.0423843566386296	1.07834901922827	0.28087802896983	0.364450860211661
BZRAP1	1979.51689776799	0.800596368915179	0.0750453296895246	10.6681704541426	1.43422496259604e-26	3.3570414255295e-25
BZW1	2873.04090658293	-0.210457213627859	0.026211712533767	-8.02912870941719	9.81673281283735e-16	7.80461976658737e-15
BZW2	785.445236597069	0.01816776572113	0.0567288440740199	0.320256229748391	0.74877410072569	0.846484944024657
C10orf10	859.231543685764	-1.033320021708	0.101750504469392	-10.1554289789182	3.1342873990311e-24	5.64896755761493e-23
C10orf105	173.907282776898	-1.72370335041754	0.160691245099744	-10.7268031270005	7.61864341276912e-27	1.82006062597524e-25
C10orf107	65.2255691327261	-0.826249744068692	0.119154730182471	-6.93425886495138	4.08356297605113e-12	2.21568184078188e-11
C10orf108	2.37793108472525	-0.308593926451636	0.120412622500361	-2.56280379949959	0.0103830704972626	0.0179070214419673
C10orf11	24.0070500827247	-1.10878079823269	0.102134451015839	-10.8560900578076	1.86567351683133e-27	4.70843374087496e-26
C10orf110	37.4196138160882	0.0475304735442369	0.0813876033480033	0.584001390740093	0.559219376360543	0.665270648676937
C10orf111	9.87233732452437	0.291439282837959	0.066736761098681	4.36699770920886	1.25966048115788e-05	3.27259028264389e-05
C10orf113	0.00394892386487386	0.0107573290932278	2.89081430390498	0.00372121069094495	0.997030910294569	0.999988810474289
C10orf114	48.6216585807871	-0.586788363428187	0.103776042867907	-5.65437211915174	1.56417003651259e-08	5.76075026855757e-08
C10orf116	398.467608819178	-0.505971781755541	0.100792063328529	-5.01995658235845	5.16831598896208e-07	1.5963957358029e-06
C10orf118	220.421090270724	0.261116285422592	0.0602682338304271	4.33256906378372	1.473794089622e-05	3.80031918446543e-05
C10orf119	1045.93801640077	0.082505615423279	0.0306880248071066	2.68852804772801	0.00717678062839217	0.0127137263021868
C10orf12	50.9627361774889	0.229425483940389	0.0617621969879845	3.71465872538541	0.000203478118037159	0.000450660075783245
C10orf120	0.41952915477882	1.28281402013863	0.475592115179084	2.69729875495431	0.00699045233882085	0.0124093294516808
C10orf122	0.00189434671157126	-0.000130844374231799	2.89081430390498	-4.52621166482576e-05	0.999963886055949	0.999988810474289
C10orf125	52.8112487114758	-0.76990897338418	0.089970896601742	-8.55731133582227	1.15530227534954e-17	1.10775086654923e-16
C10orf128	14.3145179461363	-0.37311662120913	0.102440022584049	-3.64229342982622	0.00027021980005019	0.000588676047364763
C10orf129	0.0075814588404695	0.0325336760281462	2.89081430390498	0.0112541563061311	0.991020671986555	0.999988810474289
C10orf131	1.14970435113702	0.386062366822505	0.11784386186474	3.27604985710348	0.0010526997558313	0.00211993807606538
C10orf137	340.851561285708	0.386588874748746	0.0369554137144333	10.4609537789523	1.30534991624121e-25	2.75115771961543e-24
C10orf140	31.8520410389933	-0.606374898046824	0.119730425483025	-5.06450132120173	4.0947079821231e-07	1.2810604994929e-06
C10orf18	1358.19834980005	0.216272003389424	0.0451721731377997	4.78772634492648	1.686814431667e-06	4.91560948739674e-06
C10orf2	453.816083854017	0.310243634295633	0.0484381234401733	6.40494743110394	1.50421199722465e-10	6.89576459370452e-10
C10orf25	115.163964562448	-0.0473048101975639	0.0501974297812129	-0.94237514557505	0.346000607514667	0.438233300664407
C10orf26	1659.46799395702	0.0152327170110589	0.0336726497927846	0.452376546092995	0.650997740283624	0.75559495975726
C10orf27	0.017087198972739	0.0433426638132394	2.40867628849815	0.0179943913676604	0.98564332772813	0.999988810474289
C10orf28	236.664941910228	0.125019062604739	0.0269677870969897	4.63586656758702	3.55445209509765e-06	9.95863784400756e-06
C10orf32	868.674595890838	0.109066617652871	0.0429497502667963	2.53940050816055	0.0111042623474637	0.0190407146611343
C10orf35	158.004574781488	-0.169741960443244	0.124668252453726	-1.36154920841815	0.17334019382881	0.23667903971146
C10orf4	593.087290697024	0.296856779946862	0.0468652322074703	6.33426457021892	2.38476000724596e-10	1.06958306545083e-09
C10orf40	0	NA	NA	NA	NA	NA
C10orf41	35.3724435846045	-0.423447218820622	0.0551929275426264	-7.67212825399751	1.69165674587504e-14	1.18675206851569e-13
C10orf46	933.024120519594	0.0968338156437846	0.0308243650875296	3.14146991734665	0.00168102076881347	0.00328608677597747
C10orf47	13.2330153614906	-0.201264877203039	0.0840253521435946	-2.39528751821342	0.016607336788981	0.0277187913083848
C10orf50	0.732840751900591	-0.813029835341688	0.222770581325813	-3.64962837778203	0.000262619966513785	0.000573388868769283
C10orf53	0.257089236756333	0.520783591117859	0.412989417802057	1.26100952874165	0.207305414078791	0.277965198293101
C10orf54	2041.2039482617	-0.357677437025742	0.0722022212050419	-4.95382871961791	7.27672648415839e-07	2.21189562755803e-06
C10orf55	4.28337956366673	-1.30261371278402	0.169617724284156	-7.67970280394626	1.59458088542353e-14	1.12104731177008e-13
C10orf57	522.913430373436	0.123856479318928	0.0325476653138881	3.80538751779774	0.000141582346367598	0.00032054661181187
C10orf58	3091.42841981274	-0.0201124996788849	0.0825069592666531	-0.243767311965571	0.80741103799851	0.898213409607272
C10orf62	1.66645055494298	0.40419028750597	0.162866538207481	2.48172701375317	0.0130747397599028	0.0221990902340596
C10orf67	1.76858603340513	-1.03168641149945	0.200691640411057	-5.14065463507274	2.73782891919623e-07	8.75331529549746e-07
C10orf68	5.62720366123892	0.377763774602833	0.0878101243030799	4.30205261182603	1.69223115372374e-05	4.32168789063984e-05
C10orf71	0.0153352342655731	-0.0766364399334124	2.89081430390498	-0.0265103295738817	0.978850294687148	0.999988810474289
C10orf72	507.795368643688	-0.333623330771015	0.0581503082124044	-5.73725816813209	9.62215275464581e-09	3.62303131169095e-08
C10orf75	441.325595497669	0.32182645082781	0.0776691829224365	4.14355396462969	3.41964553820264e-05	8.35658854476911e-05
C10orf76	644.705614482356	0.0443193296199766	0.0264287595372594	1.67693567144137	0.0935550617651428	0.135473840727294
C10orf78	138.546829913778	-0.0172911544360439	0.0443059960879738	-0.390266689901536	0.696339351906244	0.798634234586461
C10orf79	55.2333975299352	-1.52742612070619	0.136671196944841	-11.1759182245447	5.34942398407518e-29	1.61508299273804e-27
C10orf81	15.1547986181026	-2.79312720774545	0.275484150820676	-10.1389760515247	3.70967543505597e-24	6.63260317339479e-23
C10orf82	4.5674363284476	0.309879629656021	0.206424343996361	1.50117773735778	0.133309596501764	0.186948735993248
C10orf84	578.424027771918	-0.00631682835908922	0.031066613974305	-0.203331729821403	0.838875756685295	0.925372332325583
C10orf88	186.890733713172	0.2267302952494	0.0343594484383243	6.59877575323666	4.14566812002803e-11	2.02953188119253e-10
C10orf90	144.014747998783	-0.546925656955734	0.105798890684395	-5.16948385203065	2.34741416009642e-07	7.56406085144837e-07
C10orf91	0.0216184683004193	-0.043968781086524	2.36785588987873	-0.0185690274794451	0.98518491106538	0.999988810474289
C10orf93	14.5835493195349	-0.476570797343636	0.0928921611487769	-5.13036613046773	2.8917915590649e-07	9.21413351249475e-07
C10orf95	3.63793466175775	0.627873923955746	0.0936750675744537	6.70267916760997	2.04632431432100e-11	1.03260430985411e-10
C10orf96	0	NA	NA	NA	NA	NA
C10orf99	0.0915991245364934	-0.0883825121883689	0.988735636722329	-0.0893894271691855	0.928772425731001	0.999988810474289
C11orf1	256.230267175706	0.062554305614193	0.046780205460704	1.33719604260266	0.181158653346144	0.246244171462426
C11orf10	868.998702003029	-0.14349649660636	0.0391965383047287	-3.66094820646568	0.000251283557169538	0.000550224340698815
C11orf16	0.0976678814072423	-0.0557170679336606	0.551846569616476	-0.100964780794747	0.919578418123527	0.993572707654736
C11orf17	433.897399695826	0.106794543583992	0.0338783107996815	3.15229836031246	0.00161990659537258	0.00317386894893095
C11orf2	3277.82715160411	0.294674004012719	0.0484235704475149	6.08534235062465	1.16242654355741e-09	4.83770962154918e-09
C11orf20	21.4501827023413	0.661965902104862	0.114590403299681	5.77680052642509	7.61344560004129e-09	2.89325630572998e-08
C11orf21	5.11283661896687	-1.44549949354536	0.138511691185672	-10.4359385202199	1.69926177657813e-25	3.52847764471946e-24
C11orf24	497.571398433009	-0.333626629467976	0.0424560984642649	-7.85815563690544	3.89830749356798e-15	2.90674935647294e-14
C11orf30	432.167633999009	0.29192125319577	0.0443360691747363	6.5842836009042	4.57083920611893e-11	2.22605071183699e-10
C11orf31	792.572983967417	-0.0707502158825987	0.0476354004600916	-1.48524448622768	0.137479071523782	0.192084287241511
C11orf34	0.0722880864565953	0.0209129882533706	0.685361275436798	0.0305138165853363	0.975657274470897	0.999988810474289
C11orf35	4.59626675500611	-0.944059335016061	0.128379733312206	-7.35364773441465	1.92869616654271e-13	1.20873556314528e-12
C11orf36	0.00931813712324616	0.0434218494956055	2.89081430390498	0.0150206291137242	0.988015722585686	0.999988810474289
C11orf40	0	NA	NA	NA	NA	NA
C11orf41	1449.10055338626	0.533785911252538	0.0876395526846674	6.09069643672342	1.12420545128561e-09	4.68954954620834e-09
C11orf42	1.74574734332507	1.00184979488911	0.128305624840061	7.80830767269919	5.7960955756636e-15	4.24149224561108e-14
C11orf45	32.7824436718417	-0.755871761991229	0.0869195250222248	-8.69622517838146	3.43107242793951e-18	3.46717970965037e-17
C11orf46	654.133340289785	0.144197843192566	0.0302027612857711	4.77432648717783	1.80309663528799e-06	5.23355312085582e-06
C11orf48	632.300868096467	0.0361128909909939	0.0481195144500135	0.750483279055277	0.452963690681188	0.555343189527852
C11orf49	1309.25584784858	0.0652081628758281	0.0414750019983842	1.57222808279475	0.115897664824309	0.164535232371739
C11orf51	446.075123482297	0.114459124038185	0.052027767448894	2.19996224421155	0.0278095738806974	0.044560965554866
C11orf52	16.9216330159216	-0.430864047841625	0.107783963765812	-3.99747822206454	6.40208789421616e-05	0.000152333011238541
C11orf53	0.0965264536408137	-0.197512275350042	0.857705172523985	-0.23027991631299	0.817874265742253	0.907391924766739
C11orf54	525.001925921513	0.0239301056292156	0.0318175597179888	0.752103738983043	0.451988675613114	0.55432042112293
C11orf57	1050.5871650075	0.0509963427358246	0.0246208135632671	2.07126960304466	0.0383336082586903	0.0598269308310726
C11orf58	2872.49544093749	0.0688327449799958	0.0255543587339384	2.69358138455574	0.00706888853331244	0.0125338741468434
C11orf59	2262.9267634234	0.0537054196026366	0.036900648760467	1.45540583720504	0.14555694137999	0.202122488083035
C11orf61	227.070439371633	0.0204435708494155	0.0430412300320789	0.47497645476625	0.634803755589082	0.740290991040941
C11orf63	34.6579322542579	-1.90376922936427	0.161662494412036	-11.7761960576462	5.17774328979174e-32	2.20614451644048e-30
C11orf64	0	NA	NA	NA	NA	NA
C11orf65	7.20335115589971	0.326983159603767	0.0703471844164809	4.64813428307105	3.34950843095121e-06	9.40183565710461e-06
C11orf66	55.3755672543525	-0.209651108899629	0.0787594580393391	-2.66191660174847	0.00776971265255369	0.0136852893312025
C11orf67	242.009599210045	-0.00336193086170145	0.0585283729986159	-0.0574410442227901	0.954193868395601	0.999988810474289
C11orf68	1347.96674357006	0.14159410526013	0.0355295529047504	3.98524872068397	6.74094793178046e-05	0.000159720221517932
C11orf70	39.8185109636474	-1.03954765852048	0.136864811041381	-7.59543414125764	3.06762219018248e-14	2.09383296857636e-13
C11orf71	418.404208295433	0.0656526551701421	0.0425399995954786	1.5433158390796	0.122754162417916	0.173381336528426
C11orf73	614.291760081578	0.0382806032216465	0.0333182387130345	1.14893838030732	0.250581390209682	0.329131558435817
C11orf74	221.892879378275	0.0580390318681598	0.0353548167778896	1.64161597082457	0.100669615734455	0.14489152487627
C11orf75	108.452815872354	-0.375000098066552	0.0672368531780154	-5.57729995295447	2.44280449678347e-08	8.81191250122459e-08
C11orf80	88.4474838619544	-0.01011715339628	0.0607396428977553	-0.166565901833016	0.867711625218953	0.951518805714748
C11orf82	59.4150863115163	-0.773959267341368	0.100747532737222	-7.6821659678761	1.56420998994309e-14	1.10008837627831e-13
C11orf83	335.84569349973	-0.0385256161230017	0.0625689611790774	-0.615730473976359	0.538072421040566	0.643184090853992
C11orf84	402.035335431109	0.0922444896990014	0.0362926218711149	2.54168712380679	0.0110318876674371	0.0189331045103313
C11orf85	0.0111745577194647	0.01067493443981	2.89081430390498	0.00369270846120763	0.997053651627373	0.999988810474289
C11orf86	1.11337008715409	-1.68643614690569	0.287214676949249	-5.87169209045569	4.31369381684374e-09	1.69018835160368e-08
C11orf87	250.437295426638	0.556303337800662	0.192727409693077	2.88647753159027	0.00389580562351155	0.00719138538060999
C11orf88	4.5300691132006	-4.27774573654392	0.357268677701651	-11.9734698380589	4.89383266539628e-33	2.31019414912052e-31
C11orf9	2109.80248693079	-0.566924870598066	0.13490265404645	-4.20247381050682	2.64013801407906e-05	6.56781458449972e-05
C11orf90	2.63352585042644	0.786339215126415	0.205080565722437	3.83429415828057	0.000125925373215701	0.000287102266823149
C11orf92	95.6425178015232	-0.0930841918014163	0.147756401775114	-0.629984154210056	0.528704951643977	0.633911376118388
C11orf93	84.7164065857546	-0.419394429300994	0.123067387346097	-3.40784377035282	0.000654783721737721	0.00135906975563128
C11orf94	0.0168972630918732	0.0215261529744557	2.21446032781206	0.00972072188609677	0.992244108232932	0.999988810474289
C11orf95	866.885616894209	0.334890829014757	0.0422835102026792	7.92012837651159	2.37265482509426e-15	1.80889660077384e-14
C12orf10	809.008985219923	0.0373921272951342	0.0371744674221973	1.00585509055086	0.314485282071172	0.402695815883109
C12orf11	443.165132945014	-0.11984548017986	0.0377279741561435	-3.17656812644803	0.00149028782127361	0.00293421841986107
C12orf12	0	NA	NA	NA	NA	NA
C12orf23	1196.25697085325	0.14508603408273	0.033339873881748	4.35172714202011	1.35069292053267e-05	3.49893277282348e-05
C12orf24	357.869404891529	0.263162555197216	0.0418185790929885	6.29295784086885	3.11472956229395e-10	1.37969062632215e-09
C12orf26	48.8474547822231	-0.175197223627181	0.0420702322065784	-4.16439877885404	3.1217408086612e-05	7.68527611536964e-05
C12orf27	0.0255331089576515	-0.0658274747374968	2.34138615487304	-0.02811474501995	0.977570633897123	0.999988810474289
C12orf29	553.358941293592	0.117919069338058	0.0327762882246046	3.59769442256546	0.000321050494474027	0.000693273254028216
C12orf32	576.981729763848	-0.226799545627127	0.0411334664332315	-5.51374744930071	3.51272566569411e-08	1.24121351156325e-07
C12orf34	1450.88437489499	0.523922624892377	0.0802337613587276	6.52995217997949	6.57906935132414e-11	3.14494852308926e-10
C12orf35	443.255191063259	-0.222318942819113	0.043762819841233	-5.08008724359314	3.77261572207683e-07	1.18594603144495e-06
C12orf36	0.0279554926124381	-0.0440522003610887	2.54685832669875	-0.0172966827009138	0.986199932029689	0.999988810474289
C12orf39	51.5040719412663	-0.96335665157917	0.156971103434025	-6.13715920003115	8.40101874113093e-10	3.54411617963516e-09
C12orf4	458.471830339977	-0.185942277855514	0.0438001371957711	-4.24524418780739	2.1835549595534e-05	5.49164286693549e-05
C12orf40	0.137434118249907	-0.197965624112659	0.608930343434449	-0.325103891187465	0.745102444049598	0.843192964134311
C12orf41	545.436120780241	-0.00613383661260999	0.0279800248962854	-0.219221985518116	0.82647713002864	0.915079717903919
C12orf42	0.810052536251997	-0.434730502154881	0.189368491107274	-2.29568551564692	0.0216938692164817	0.0354834911114618
C12orf43	374.207063017037	0.203457959342566	0.0324825611280097	6.26360583270401	3.76175639081573e-10	1.6503270459819e-09
C12orf44	692.768403492988	0.0338072570373238	0.0412684267693418	0.819203921348393	0.412670077999972	0.511260021740163
C12orf45	85.8103969499445	-0.0745033361821846	0.0523216101244175	-1.42394960715124	0.154461060164456	0.21322342000963
C12orf47	411.195168434089	0.186857467876101	0.0387125914615712	4.82678789565378	1.38752759119115e-06	4.08639746148979e-06
C12orf48	36.361487932454	-0.692244512544498	0.0872351223174033	-7.93538765298889	2.09838865441569e-15	1.61105447026485e-14
C12orf49	639.541934764346	0.0114894291747115	0.0485912578317905	0.236450540434346	0.813083082188741	0.903298181211432
C12orf5	390.091943396346	-0.573312435407902	0.0547513162669404	-10.4712082648884	1.17138194322692e-25	2.49013537283175e-24
C12orf50	0.160387670786178	-0.220030686834146	0.406427674718543	-0.541377225324334	0.588247601654244	0.695224185792735
C12orf51	2497.58908435914	0.488960275483749	0.0449428186946034	10.8796085712012	1.44180759531667e-27	3.71006307370047e-26
C12orf52	398.135872946192	-0.0536558093982251	0.0356798412807186	-1.50381300679218	0.132629521188008	0.186114351624319
C12orf53	1967.08863388133	0.388849154772861	0.0648654221497808	5.99470629937425	2.03853529105526e-09	8.27393138235523e-09
C12orf54	0.789763266177798	0.105235129411976	0.189473478112001	0.555408231593078	0.578615463485254	0.685239164884324
C12orf56	0.292966353323599	-0.603305733711102	0.418719951272071	-1.44083350191043	0.149631726254007	0.207254470258242
C12orf57	1594.37001689644	-0.075338007630078	0.0582356499805651	-1.29367505394411	0.195777685573909	0.26398272077008
C12orf59	47.023097612778	-0.865834345440131	0.102682968507891	-8.43211253065394	3.39480293848129e-17	3.12274279644879e-16
C12orf60	20.7111322453255	-0.350626675744844	0.0495375306144508	-7.07800068747394	1.46249000351874e-12	8.337421291418e-12
C12orf61	8.30134389102713	-0.166585161753476	0.0724147310665953	-2.30043196045675	0.0214237598765008	0.0350708285379558
C12orf62	484.453817982843	-0.143861358511669	0.0454392488281618	-3.16601533303755	0.00154542647207733	0.00303488827841603
C12orf63	13.6620939909939	-1.66164346764179	0.181452004887372	-9.15748199460891	5.3122342008879e-20	6.41148560665103e-19
C12orf65	436.407666124553	0.036359326663703	0.0311211215571669	1.16831672010644	0.242679033427318	0.320097612772498
C12orf66	91.092027324632	-0.0513339315477706	0.0434276907296389	-1.18205528973098	0.237183763277798	0.31377435350292
C12orf68	387.492986624054	0.0552759684041266	0.0876873020715454	0.630375973467927	0.528448626727767	0.633642639771949
C12orf69	1.09132027913495	-0.0517585897878636	0.160622430243952	-0.322237620917906	0.747272685846984	0.845109575821637
C12orf70	0.443288202015057	-1.01350893186178	0.263600206527518	-3.84487153941581	0.000120615607952946	0.000275698820547347
C12orf71	0.709079399373288	0.251908737123491	0.177195033966111	1.42164671032298	0.155128837423527	0.214055177672938
C12orf72	55.0516397750659	-0.173867759502396	0.0349059660320696	-4.98103273642838	6.3245838657438e-07	1.93652433981045e-06
C12orf73	147.168283686161	-0.00627447562580301	0.0362545236728602	-0.173067385532913	0.862598460644336	0.947082977175735
C12orf74	0.00187979867753843	-0.000130844374231839	2.89081430390498	-4.52621166482715e-05	0.999963886055949	0.999988810474289
C12orf75	143.140552042949	-0.503374356677217	0.0787295558471334	-6.39371518435341	1.61902879631065e-10	7.39628263062779e-10
C12orf76	836.743883677747	0.147508857755741	0.0422144367565895	3.49427516009001	0.000475350815986918	0.00100335415105109
C12orf77	0.00558203842056147	-0.000172041700940962	2.89081430390498	-5.95132315170033e-05	0.999952515311437	0.999988810474289
C13orf1	378.820611576225	0.0577521920185689	0.0458684355358004	1.25908353629138	0.208000160403547	0.278725878661935
C13orf15	2702.97244705208	-0.0162076729700482	0.0821804795014317	-0.197220472165362	0.843655010759971	0.929666107920432
C13orf16	10.6337902115721	0.25515716951893	0.128520130151077	1.98534789234177	0.0471057790698686	0.0722628788178275
C13orf18	148.876015744526	-1.08900054439557	0.109262482698975	-9.96682957860146	2.12917002792089e-23	3.5640061224169e-22
C13orf23	792.620159527725	0.160534913508928	0.0355651653790908	4.51382446272297	6.36689209610966e-06	1.72088797078015e-05
C13orf26	14.5535755589954	-2.1992774833889	0.219422521599778	-10.0230252909058	1.20749148259083e-23	2.05618251166094e-22
C13orf27	188.996792600311	-0.025817673481563	0.0633646535726062	-0.407445981725125	0.683680460919479	0.786940116547769
C13orf28	0	NA	NA	NA	NA	NA
C13orf29	22.7904502975674	-0.966380285123857	0.0996312575824881	-9.6995692774806	3.0277407743659e-22	4.57414252827265e-21
C13orf30	2.49592872812669	-2.39354189426022	0.389917004811531	-6.13859325118984	8.32554356144263e-10	3.51465419272996e-09
C13orf31	144.583955437433	-0.717100119876152	0.102410496067607	-7.00221312669705	2.51950411066917e-12	1.39905326991601e-11
C13orf33	10.4918304865947	-1.17626150440517	0.173686943553394	-6.77230815592979	1.26743813324469e-11	6.53813408095432e-11
C13orf34	75.3321079761476	-0.377803432204856	0.0537831113731693	-7.02457374738885	2.14720741817745e-12	1.20078914848929e-11
C13orf35	0.112515990069374	0.162295600962941	0.555026355100487	0.292410620633604	0.76997268882378	0.865713524074486
C13orf36	71.7250043528525	0.338688232890133	0.198431408148797	1.70682774491104	0.0878540738976749	0.127924213675252
C13orf37	315.480389380914	0.0264816309111584	0.0501354551675779	0.528201665321348	0.597359373673346	0.703879999446894
C13orf38	13.7212274315042	-0.345656046094061	0.0907737641963171	-3.80788490104375	0.000140160478653785	0.000317534701611204
C13orf39	2.24291138666873	0.755252907023055	0.333437801715425	2.26504884310517	0.0235096823890144	0.0382090569540743
C14orf1	830.957092122427	0.00924511302968147	0.0377956865821557	0.244607622342977	0.806760261553603	0.89769237175302
C14orf101	295.099659727862	-0.0013894810835353	0.0396172584088427	-0.0350726208561963	0.972021833367433	0.999988810474289
C14orf102	308.711979382963	0.214831347668146	0.0403876830097725	5.31922932088389	1.04207721847264e-07	3.49578903299829e-07
C14orf104	271.386394930795	0.0996365628452674	0.0308447948133283	3.23025532989487	0.00123679711735975	0.00246445503140265
C14orf105	1.46031348975161	-0.351393676513628	0.320398209681225	-1.09674044952761	0.272754868818029	0.355127957714326
C14orf106	180.802326444092	-0.606620400926396	0.0763061193388794	-7.94982638590705	1.86773078419729e-15	1.44521542794511e-14
C14orf109	250.832004543335	-0.0228236596419998	0.0329481200127821	-0.692715081562936	0.48848837259672	0.592257552018134
C14orf115	0.161555818541288	0.0308528441243205	0.581317158489053	0.0530740296820285	0.957672923592074	0.999988810474289
C14orf118	236.618115663431	0.330488879019703	0.0533045297174693	6.20001491001605	5.64578119187269e-10	2.42975957066056e-09
C14orf119	553.155643413843	-0.257734778180913	0.0274486235186397	-9.38971595445915	6.01622810021564e-21	7.93763070728853e-20
C14orf126	394.966452069959	-0.0571080580990337	0.0329721619107746	-1.73200830001905	0.0832720846509209	0.121711537448276
C14orf128	157.42536253755	-0.0390649437925459	0.058723429295473	-0.665236078022394	0.50589950815015	0.610023388541237
C14orf129	270.857228460345	-0.0855336600984167	0.0454493191817877	-1.88195690580754	0.059841867004935	0.0902050043642044
C14orf132	5589.31095051846	0.469715659350486	0.0719612816073059	6.52733871408425	6.69485354962191e-11	3.19486526361957e-10
C14orf135	1105.73517171597	0.084938512851896	0.0347311713790621	2.44559885196103	0.0144611799783225	0.0243702018554301
C14orf138	93.9559604158303	-0.014716687949079	0.0543070704369478	-0.270990274943399	0.786398511977719	0.879659887957801
C14orf139	137.328742912218	-0.306598361534414	0.0649141721960227	-4.72313442754184	2.32237230260047e-06	6.64378706244589e-06
C14orf142	145.882468449562	-0.397436988370707	0.0376263645630369	-10.5627262422567	4.4358817446671e-26	9.83337073691125e-25
C14orf143	45.9972248910747	-0.0594366889236296	0.042984304504782	-1.38275330049873	0.166740522572452	0.228698939997124
C14orf145	56.1141387357476	-0.163972525750327	0.0539964040280167	-3.0367304768156	0.00239159195278487	0.00456806594125463
C14orf147	1053.54937356624	-0.218643357138298	0.0419439216368178	-5.21275428252697	1.86057272085384e-07	6.05678419216269e-07
C14orf148	10.2754627274947	-0.137938420218193	0.072607328129133	-1.8997864784787	0.0574611460936302	0.0869158337830882
C14orf149	178.694980849417	0.000169531722168435	0.0514956379654869	0.00329215694506121	0.997373243546725	0.999988810474289
C14orf153	406.064182085381	-0.105727893451422	0.04026334444052	-2.62590937043521	0.00864178233922212	0.0151010639456358
C14orf156	462.104194436287	-0.0315390300763253	0.0444879079536073	-0.708934888761565	0.478364883249554	0.581847054298534
C14orf159	1382.19580200566	0.124820945205151	0.047996603145144	2.60062039864961	0.00930553592249704	0.0161762164106636
C14orf162	17.3813059247925	0.19267021262648	0.165547921205928	1.16383347627068	0.244491502847917	0.322293928451165
C14orf165	0	NA	NA	NA	NA	NA
C14orf166	1360.21589059867	-0.189440032019135	0.0323533930849064	-5.85533738368583	4.76042617837304e-09	1.85635874249749e-08
C14orf166B	0.4663865729555	-0.259532246059484	0.255286209517007	-1.01663245558979	0.309328308565165	0.396711691582857
C14orf167	525.934730576988	0.112998577863934	0.0603403173244875	1.87268782920498	0.0611115049934914	0.0918581694708004
C14orf169	92.3227348097454	-0.560663006182188	0.0728925813754263	-7.69163329934149	1.45268474620715e-14	1.02494979315727e-13
C14orf174	25.8030037467442	-0.669779514183149	0.0928718118058711	-7.21187086974444	5.51882985375743e-13	3.30207190490015e-12
C14orf176	22.5314432392005	0.266128574812404	0.0692858247306873	3.84102485388376	0.00012252170719229	0.000279730898408749
C14orf177	0	NA	NA	NA	NA	NA
C14orf178	3.02513121182661	0.643108568799692	0.0978489050494398	6.57246566504501	4.94888019570289e-11	2.39947553331063e-10
C14orf179	270.075681351755	-0.0701462243256995	0.0451225029324798	-1.55457299056891	0.120047800546916	0.169839079615211
C14orf180	1.80108902257427	-0.855280034618141	0.248894276266293	-3.43631861466784	0.000589677056328082	0.00123068202436581
C14orf181	15.5518040202929	-0.664108635177008	0.101756269683689	-6.52646404237697	6.73404734844922e-11	3.2127901612754e-10
C14orf182	0.27811452551936	-0.22135040607579	0.298571241606768	-0.741365460667236	0.458471880769681	0.561048052527115
C14orf183	0.00754662577577631	0.0543512202897748	2.89081430390498	0.0188013530361863	0.98499957444769	0.999988810474289
C14orf184	0.132796896354205	0.0857479011949776	0.504078536315305	0.170108217306324	0.864925031227814	0.948949350112558
C14orf19	3.55709643644698	0.362015072754195	0.112249956983352	3.22507983506743	0.00125937544244837	0.00250716075895997
C14orf2	910.748575713808	-0.0134322791747026	0.049730186932872	-0.270103130576084	0.78708091374497	0.880323169719872
C14orf21	342.505374227492	0.322283175645728	0.0482907974387839	6.67380107057193	2.49261443010226e-11	1.24472640934964e-10
C14orf23	51.0239426138105	0.560706403084718	0.129585499409523	4.3269224229537	1.51207186356564e-05	3.89290277717624e-05
C14orf28	80.5120982592269	0.0864949792697539	0.0357844837248258	2.41710848575823	0.0156443536916756	0.0262271420899876
C14orf33	48.4127905484223	0.211557953462123	0.0447650235834054	4.72596541958594	2.29024624284888e-06	6.5566459119372e-06
C14orf34	0.138555067025107	-0.274348434996913	0.635377743288603	-0.431787921271736	0.665895559137419	0.770006353767065
C14orf37	336.531187568163	0.310580172911519	0.0630944247763858	4.92246619273021	8.54603315454446e-07	2.57900755246371e-06
C14orf39	1.126410703026	-0.788084747892259	0.346662167900332	-2.27335088990397	0.0230050430914298	0.0374662259663105
C14orf4	1228.63603704323	-0.0158379661312314	0.0462604748679637	-0.342364970883588	0.732076246588395	0.831127568723258
C14orf43	987.482065359955	0.215417166043137	0.0395768280960299	5.44301239908477	5.23869989267103e-08	1.81844132229288e-07
C14orf45	107.167188553401	-0.326205738742422	0.0532615791984659	-6.12459757392658	9.09130876994474e-10	3.82455150432999e-09
C14orf48	0.00773582163415466	-0.011101412495109	2.89081430390498	-0.0038402371539787	0.996935941596181	0.999988810474289
C14orf49	78.625717439725	0.206460151895259	0.0760019886611672	2.71650986417871	0.00659742291871883	0.0117710749709943
C14orf50	8.84470012756431	-1.67809678819614	0.14074358409135	-11.9230784055277	8.97306020271297e-33	4.06992373480195e-31
C14orf53	0.0264403295338293	-0.0985723877461591	1.86647785758544	-0.0528119781038692	0.957881717673775	0.999988810474289
C14orf64	55.135096372761	0.0319139700341084	0.0708330014087013	0.45055227647304	0.652312268957287	0.756674544161709
C14orf68	0.736220180223972	-0.402594813034509	0.231172623647059	-1.74153326065619	0.0815901483558837	0.119412793337217
C14orf70	0.1364312650214	-0.437919901055719	0.804417494129996	-0.544393805767916	0.586170507397941	0.693019005293001
C14orf72	0.150536888526848	-0.361701917244504	0.56800268279785	-0.636796142340109	0.524257639194064	0.629345751160822
C14orf73	0.28332350635908	-0.646735057836278	0.496308627548036	-1.30309050042392	0.192543866399639	0.260121200334698
C14orf79	236.470565214818	-0.192653892359184	0.0481722055070442	-3.9992748999423	6.35368459860734e-05	0.000151254421724012
C14orf80	209.558068894762	0.225359875090036	0.0747481146998986	3.0149238679105	0.00257043767661554	0.00488128854320177
C14orf86	13.8689506790244	-1.07147508639457	0.151679495733056	-7.06407336875833	1.61691302156233e-12	9.17260312088023e-12
C14orf93	236.946990218179	0.0544063755823329	0.0386194150528742	1.40878300481363	0.158899342008217	0.218813119792357
C15orf17	1751.27409015061	0.187133218554646	0.0262734760412138	7.12251467073105	1.05975469150421e-12	6.13566797125307e-12
C15orf2	0.598140677934002	-0.442636401796241	0.318634559816558	-1.38916632913603	0.164782177889455	0.226217809592993
C15orf21	24.3061369825773	-0.122606200261668	0.0798808068342536	-1.53486431998698	0.124817159426676	0.175992105387445
C15orf23	232.349539636063	-0.262647609085357	0.0537313158729042	-4.88816632941993	1.01779523789848e-06	3.04395309298565e-06
C15orf24	1295.70603733039	-0.0734470825951491	0.0313939103063539	-2.33953279086371	0.0193078765612322	0.0318588055413123
C15orf26	4.41843334833181	-2.77550389978577	0.255812200114172	-10.849771428208	1.99924675421965e-27	5.03263073616545e-26
C15orf27	31.9840414439456	0.152199464863466	0.119947782571968	1.26888102139068	0.204483502190717	0.274536744006565
C15orf28	4.98780213759524	0.6923682888627	0.0961946689101013	7.19757442597732	6.12930950307504e-13	3.65511837528119e-12
C15orf29	455.887185544657	0.174398645526638	0.0312098396841101	5.58793788407155	2.29781799442973e-08	8.31786451275272e-08
C15orf32	0.0242490651418589	-0.0876451366326661	2.34911107904765	-0.0373099158291818	0.970237899310455	0.999988810474289
C15orf33	32.5693737065097	-0.227113921637033	0.0544243178146681	-4.17302284633916	3.00584787416924e-05	7.41666024104056e-05
C15orf34	6.78872128651171	-0.154336665694644	0.0747060933419606	-2.06591803680834	0.0388362194621459	0.0605393554095931
C15orf37	43.8080128145538	-0.0574951302239751	0.0652253971934962	-0.881483788491335	0.378056024712375	0.473201045747002
C15orf38	394.644442057699	0.235572796793058	0.0414748264425775	5.67989831420301	1.34774842422158e-08	4.99443293125032e-08
C15orf39	618.95514497367	0.616763833602137	0.060558220642606	10.1846425977749	2.32211593233782e-24	4.22857096466883e-23
C15orf40	224.015882198866	-0.0971273541092628	0.0259532648558057	-3.74239444050275	0.000182275108801758	0.000406581928245054
C15orf41	123.961394901024	-0.128144008834514	0.0374506206393622	-3.42167917772314	0.000622357025355692	0.00129572692164218
C15orf42	92.3091429059625	-0.256833250905886	0.0916527838076875	-2.80224168034866	0.00507488400655795	0.00921238396063198
C15orf43	0.0142886706091272	-0.0766364399334119	2.89081430390498	-0.0265103295738815	0.978850294687148	0.999988810474289
C15orf44	743.96445800148	-0.0874725380709733	0.0244332063050725	-3.58006791981344	0.000343504910290579	0.000739004826127873
C15orf48	2.76015658482873	-1.1642685230013	0.197987308801406	-5.88052097909535	4.08977165056972e-09	1.60628800761103e-08
C15orf5	0.090664141260596	-0.0119992158652411	0.672456540157389	-0.017843853317915	0.985763420431594	0.999988810474289
C15orf50	0.546959198360447	1.49381255069618	0.240394750306558	6.21399822080652	5.16531129548212e-10	2.23372479902385e-09
C15orf51	6.47369106957457	-0.906473586664876	0.148005983743962	-6.12457391069406	9.09265991377412e-10	3.82455150432999e-09
C15orf52	739.833148126275	-0.249825999662134	0.0622406728798121	-4.01387048216128	5.97311303035736e-05	0.000142435772262368
C15orf53	0.00563406637711401	-0.0219895859625692	2.89081430390498	-0.0076067099615721	0.993930782092764	0.999988810474289
C15orf54	0.282544665467977	-1.33729029011585	0.535505617347365	-2.49724792195483	0.0125161416889884	0.021311326801119
C15orf55	0.0582022868273719	0.0428954021409391	0.853364390047932	0.0502662199655762	0.959910242287513	0.999988810474289
C15orf56	2.9097036261285	-1.33750657158771	0.133534399391921	-10.0161949106623	1.29388788604961e-23	2.19759991690135e-22
C15orf57	317.346213945172	0.0627747458083193	0.0330857973287266	1.89733211458124	0.0577841190203846	0.0873640847093909
C15orf58	37.7540879432433	-0.0138159891128792	0.0360513033969091	-0.383231334544862	0.701548246672295	0.80271897440968
C15orf59	883.142076964682	0.548104738710541	0.0731649446410985	7.49135725311077	6.81649942346105e-14	4.48322055298466e-13
C15orf60	0	NA	NA	NA	NA	NA
C15orf61	96.260353176688	0.0849439980737156	0.0387513894543863	2.19202457691748	0.0283777320641172	0.0453974527169564
C15orf62	30.9946478402513	0.590739447088458	0.0635986846309395	9.28854819115354	1.56407098176515e-20	1.97617055687079e-19
C15orf63	938.14516289472	0.0695592511388571	0.0506057173696627	1.37453344709538	0.16927613394768	0.231912182394659
C16orf11	0.703846312362877	0.290765072258279	0.52537774280242	0.553440027183694	0.579962136527628	0.686668751205723
C16orf13	612.213671702312	0.000734416389984982	0.053619136550578	0.0136969081792695	0.989071790132432	0.999988810474289
C16orf3	2.37308921660636	0.164125757300675	0.117802688087818	1.39322590990729	0.163551487039702	0.22465361959225
C16orf42	1281.94267112931	0.0332477069578502	0.0455454499017986	0.729989648352057	0.465396512120403	0.568074058478957
C16orf45	2661.59090585327	0.266237691324165	0.043325244220269	6.14509383883888	7.99162546285357e-10	3.38021373520139e-09
C16orf46	79.6923885204995	-0.101611623138177	0.0469868373892198	-2.16255506401649	0.0305754176034779	0.048644394692028
C16orf48	438.908085155495	-0.135933893116655	0.0580239190475852	-2.34272168009156	0.0191436576913873	0.0316222960187094
C16orf5	3545.38562771258	0.0974336775327896	0.0501162987640027	1.94415150232071	0.0518771841328259	0.0791016552792159
C16orf52	448.897996950784	0.17481389327542	0.0399506695439926	4.3757437677714	1.21019110024102e-05	3.15322459407603e-05
C16orf53	963.032713048906	-0.0544266845435888	0.0461549686821428	-1.1792161515353	0.238312116203043	0.315055339654594
C16orf54	18.1369653640578	-1.17821448183731	0.0974004401691144	-12.0966032575582	1.10072149777385e-33	5.67217347740266e-32
C16orf55	177.981651416288	-0.419903982081628	0.0456918806137966	-9.1899036861888	3.93193255804266e-20	4.81343858240484e-19
C16orf57	839.032138296461	-0.131963036270061	0.027729669577	-4.75891124139163	1.94639996378852e-06	5.62626773673672e-06
C16orf58	1855.62188858084	0.0854229906870298	0.0242411847180645	3.52387854308839	0.000425279141915646	0.000902600529230134
C16orf59	76.3550941632018	-0.0922479600892734	0.0882935262115668	-1.04478735924796	0.296121258449975	0.381624967746415
C16orf61	403.286821385777	-0.243505269188066	0.0369341903769196	-6.59294996595441	4.31171920695951e-11	2.10506430032237e-10
C16orf62	1660.5069763746	0.0975213477982634	0.0230119752624064	4.23785210466394	2.25668337707631e-05	5.66689785403077e-05
C16orf63	552.515614566559	-0.236128826815837	0.0208783566265447	-11.3097419993115	1.17434325109709e-29	3.75885315412133e-28
C16orf68	181.208421903556	0.0682432973410762	0.0329350132967331	2.07205920113733	0.0382599205428092	0.059730869687144
C16orf7	865.220064207055	0.267380919274379	0.0398857878481666	6.70366397906492	2.0325736546037e-11	1.02592852284292e-10
C16orf70	479.622765359949	-0.0926205130640108	0.0323267490714833	-2.86513539790844	0.00416830973806891	0.00765635692767439
C16orf71	31.4479699077713	-0.652532383254271	0.0844883341747468	-7.72334298726545	1.13317713729119e-14	8.07642897149626e-14
C16orf72	873.655890083556	0.0142051540981014	0.0229910920272536	0.617854692646291	0.536671127124596	0.641742870699045
C16orf73	1.43194342114691	0.201839595427682	0.196783188698824	1.0256953186006	0.305035221682177	0.391904743787993
C16orf74	22.0790468235856	-0.670965873234716	0.106104928403402	-6.32360704946485	2.55527035374516e-10	1.14085953534755e-09
C16orf75	70.6172925250891	-0.61636924086016	0.104171370357578	-5.91687753309199	3.28110810625686e-09	1.30448246113924e-08
C16orf78	0	NA	NA	NA	NA	NA
C16orf79	75.189756959436	0.100742123998857	0.0864581187318329	1.16521300112172	0.243932784276185	0.321600486134666
C16orf80	824.453457288555	-0.0843539448091173	0.0299700534717389	-2.81460775132287	0.00488368025393911	0.00888495802206945
C16orf81	2.19501026297999	0.23252777746296	0.154731325246354	1.50278411364178	0.132894723854924	0.186459917254753
C16orf82	0.387319626275002	0.148355516596779	0.481478449846969	0.308124936108628	0.757987267432603	0.855119454376227
C16orf86	121.107412357853	0.19878896832965	0.0524601306101032	3.78933422425307	0.000151051573228355	0.000340777463980126
C16orf87	153.933527818287	0.144278241287196	0.0421608553471437	3.42208999554774	0.000621417413560041	0.0012939075297154
C16orf88	357.236725847891	-0.0247283537925949	0.0387098370572536	-0.638813171856563	0.522944478402286	0.62792253613206
C16orf89	201.466414330483	-1.03743424349108	0.116975783749492	-8.86879497822205	7.39416701998859e-19	7.95378020702051e-18
C16orf90	0.0225311634972847	0.0541910111499657	2.17381229826786	0.0249290204095111	0.980111579483882	0.999988810474289
C16orf91	215.794338984417	-0.00517127649208697	0.0361220789569872	-0.143161098181661	0.886162952445546	0.96734418670718
C16orf92	2.61601633402704	0.364852344247144	0.148344752917295	2.45948937911242	0.0139134814352092	0.0235156591441654
C16orf93	79.4416076834424	-0.387385354975017	0.0697842619535734	-5.5511850971891	2.8373945890017e-08	1.0142384689395e-07
C17orf100	191.575642520383	0.295574021180769	0.0399115593011862	7.40572471624743	1.30436160397031e-13	8.34732060278141e-13
C17orf101	277.236698081409	-0.061239913174075	0.0423717675235984	-1.44529994270284	0.148373653974237	0.20561319102308
C17orf102	27.3351082325903	0.670992650706178	0.127520118278564	5.26185718586313	1.42607521392185e-07	4.70616774284186e-07
C17orf103	361.259865044934	0.0322207139457562	0.0308559931332513	1.044228711311	0.296379586321179	0.381871459401257
C17orf104	25.2175130293297	-0.12331230244349	0.0566618981109068	-2.17628259120662	0.0295341364587357	0.0471095921068157
C17orf105	0.0473105497033895	0.228438403789004	2.89081430390498	0.0790221646130724	0.937014993377032	0.999988810474289
C17orf106	179.912291289966	-0.21672615130274	0.0475697818531151	-4.55596269017886	5.21461925786313e-06	1.4274757348218e-05
C17orf107	29.7007706951772	0.204051675129165	0.115375548304775	1.76858682907529	0.076962850333663	0.113288993405979
C17orf108	514.445325701243	0.060089958574814	0.0576431735109506	1.04244709156061	0.297204443184621	0.382783922015785
C17orf28	676.168893795524	0.00927170326519246	0.0765639304601586	0.121097535216235	0.90361378142246	0.981668023940693
C17orf37	762.846234558087	-0.198125706874323	0.0352172515734487	-5.62581399803771	1.84635214216926e-08	6.74312466022298e-08
C17orf39	388.509115184132	0.0899375619093288	0.0220453792255679	4.07965592195487	4.51024094127276e-05	0.00010883070964569
C17orf42	121.799033568537	-0.162738141951496	0.0310201092369265	-5.24621434143023	1.55256268021113e-07	5.10220306510119e-07
C17orf44	24.5272961470973	-0.532687541725997	0.0553557642424957	-9.62298234005885	6.39495935593751e-22	9.38038561264008e-21
C17orf46	0.432346177244933	-0.0811868459553471	0.238434151280253	-0.340500073162426	0.733479967698271	0.832481155681531
C17orf47	1.79741298989647	0.232390624127289	0.123524228292885	1.88133637699217	0.0599261755891431	0.0903182579030917
C17orf48	120.568587678117	0.113291201056081	0.0371550420202052	3.04914743453856	0.00229491825778562	0.00439578339053322
C17orf49	943.411602028237	-0.0935189488199824	0.0432141809039771	-2.16408009740561	0.0304582026908665	0.0484735807235595
C17orf50	2.10567708452651	0.506861067425524	0.130293665777848	3.89014357988614	0.000100184926917325	0.000231934644992066
C17orf51	838.66520803805	0.353299749035435	0.0524257376763334	6.73905155549057	1.59423832066277e-11	8.14074742989536e-11
C17orf53	39.1727540185499	-0.369740358123386	0.0829473939745853	-4.45752832496066	8.29100845832834e-06	2.20910261914176e-05
C17orf54	0.0421369341787291	0.0976237920778236	1.39492229996054	0.0699851110564261	0.944205510233799	0.999988810474289
C17orf55	3.02741770639911	-0.105750595772267	0.142830653572643	-0.740391457485579	0.459062500723366	0.561561355129224
C17orf56	346.291490548813	0.0301538692466737	0.0469178202191529	0.642695442921796	0.520421738573745	0.625351112429751
C17orf57	11.8727321996323	-0.134706456710095	0.089183638004281	-1.5104391312634	0.130931409998634	0.183875637142263
C17orf58	205.302454647577	-0.154367053382968	0.0352113661187801	-4.38401205060418	1.16513323730215e-05	3.04590275913583e-05
C17orf59	281.132565854152	0.0905175503024463	0.0406298045663972	2.22786083439123	0.0258897966235374	0.0417601316399815
C17orf60	25.7496927539445	-1.08019344417539	0.103933182088466	-10.393152816739	2.66398562943215e-25	5.39511904479134e-24
C17orf61	403.692922143595	-0.124411244544506	0.0525558108514242	-2.36722148377118	0.0179222038013276	0.0297444213665909
C17orf62	1333.57229506073	-0.200313358805342	0.0368770327201097	-5.43192724657881	5.57486526179343e-08	1.9286682368788e-07
C17orf63	645.579263381501	0.0263590796186083	0.0274040179576008	0.961869155807401	0.336115334026518	0.427335164393981
[truncated: 18,502 more rows]

## Sheet: DEG
gene_name	baseMean	log2FoldChange	lfcSE	stat	pvalue	padj
A2LD1	40.2250224916533	-0.992383	0.088801490983472	-11.1752929394618	5.3872331175521e-29	1.62401e-27
A2M	13118.8704960504	-0.611141	0.0678974028690732	-9.00094458533091	2.23783888307037e-19	2.52881e-18
ABCA13	17.8171498527966	-2.38166	0.176447057618137	-13.4978628619874	1.60978369454434e-41	1.89752e-39
ABCA5	162.917384085213	-0.605987	0.130224295114248	-4.65340619408483	3.26496172564097e-06	9.18023e-06
ABCA6	44.7500083546446	-0.678863	0.158393610127047	-4.28592243235646	1.81982482215093e-05	4.63431e-05
ABCB11	0.850067466068097	-2.28441	0.432514478741219	-5.28170356909805	1.27988164514761e-07	4.25223e-07
ABCC3	200.42768799206	-3.63781	0.197725940836501	-18.3982306568689	1.35724610422167e-75	3.81677e-72
ABCC8	757.788421595792	1.37183	0.124044383596386	11.0591644770414	1.97932686361342e-28	5.66108e-27
ABHD15	173.518933398738	-0.607039	0.0537271202269796	-11.2985656252841	1.33378704961652e-29	4.25536e-28
ABI3	297.909408629042	-1.0025	0.0890947058986028	-11.2520545563734	2.2625931996564e-29	7.04733e-28
ABP1	0.873617710143417	-1.41252	0.302319531121778	-4.67226635382497	2.97894299851649e-06	8.4181e-06
ABTB2	395.877209228171	0.589289	0.0915768487019225	6.43491691866779	1.23540885720462e-10	5.72482e-10
ACAA2	564.646616333943	-0.853384	0.0728731680306548	-11.7105441003446	1.12554990883258e-31	4.60633e-30
ACADL	19.7938003970596	-1.02495	0.154798989367083	-6.62115914090332	3.56393025525811e-11	1.75653e-10
ACAP1	18.1771598860803	-1.49802	0.116668928876761	-12.8398953328496	9.80068862035848e-38	7.93936e-36
ACCN2	3359.10009141876	0.922486	0.0699150726144525	13.1943784282704	9.45313648340685e-40	9.39823e-38
ACCN4	2257.68451344025	1.06636	0.121871235371224	8.74991936054671	2.13505259934818e-18	2.20275e-17
ACCS	82.2518207498497	-0.718005	0.109857335548827	-6.5357960200277	6.32721017800894e-11	3.03333e-10
ACOT11	81.8965572508291	-0.738025	0.119694855808601	-6.16588419781798	7.0090366799347e-10	2.98772e-09
ACOT12	0.781555642768626	-2.63781	0.501841248415478	-5.25626528867441	1.47010186252768e-07	4.84334e-07
ACPP	10.7520925849767	-1.26803	0.171556078407209	-7.39135267930452	1.45342539100631e-13	9.24416e-13
ACSL1	959.758681794044	-0.73268	0.0707081168080667	-10.3620335322617	3.69031591116109e-25	7.38251e-24
ACSL6	851.281944711685	0.870103	0.0925550700392917	9.40092127685461	5.40873849430257e-21	7.19399e-20
ACSM3	1.46465807255113	-0.895802	0.152795598492235	-5.86274719796437	4.55271099688781e-09	1.77924e-08
ACSS3	236.660286239871	-1.11628	0.119215000253943	-9.3635484798394	7.71027498946475e-21	1.00381e-19
ACTA2	776.049384482518	-0.592628	0.107816153583548	-5.49665013877314	3.8707355554706e-08	1.36307e-07
ACTG2	34.4852327396106	-1.06456	0.199100454087767	-5.34685889039248	8.94937322132196e-08	3.02695e-07
ACTL6B	530.348728529465	0.891141	0.130966948249199	6.8043231410917	1.01525425295352e-11	5.30114e-11
ACTN1	1910.45886337813	-1.1626	0.100367594791484	-11.5833761307355	5.00358822442241e-31	1.87611e-29
ADAM11	354.812254065818	0.595468	0.134654209037293	4.42220340947344	9.76994115915903e-06	2.5767e-05
ADAM12	112.716987483876	-2.08706	0.142222156706885	-14.6746676207366	9.36734420364076e-49	2.33413e-46
ADAM19	231.292729842745	-0.693351	0.0966523619957839	-7.17365697336898	7.30204380868002e-13	4.31395e-12
ADAM22	633.613346692181	0.742892	0.0849404620402648	8.74603385431026	2.20982835795176e-18	2.27275e-17
ADAM28	221.360842775015	-0.640568	0.0977249432552952	-6.55480994992572	5.57127839254499e-11	2.68669e-10
ADAM29	5.97220387068196	1.23812	0.153594868611154	8.06093342124068	7.5714060745824e-16	6.11334e-15
ADAM32	6.02134371419373	-0.645362	0.130305463323715	-4.95268357350733	7.31969486834897e-07	2.22427e-06
ADAM33	78.6705856697107	-1.39991	0.134980020034415	-10.3712384726346	3.35152567170956e-25	6.74589e-24
ADAM6	166.70281265033	-2.73796	0.193620436195181	-14.1408642980373	2.12656421992239e-45	3.45962e-43
ADAMTS14	84.3932940407844	-1.22431	0.141036902557533	-8.68074877081629	3.93171750722379e-18	3.94474e-17
ADAMTS18	20.2923873464283	-1.60433	0.241939832246394	-6.63109385974018	3.33208260268112e-11	1.6468e-10
ADAMTS19	31.4359379159606	0.655436	0.148937588706854	4.40074333039109	1.07880673984254e-05	2.83075e-05
ADAMTS20	38.9825215257655	0.952659	0.212489178315883	4.48332782757277	7.3487898898782e-06	1.96978e-05
ADAMTS3	48.0419459329166	-1.37113	0.154959042123893	-8.84836387614191	8.8811673178976e-19	9.45515e-18
ADAMTS4	514.564529008242	-0.779731	0.123922992490624	-6.29205979237646	3.13280756825146e-10	1.38707e-09
ADAMTS7	80.0812282071512	-1.003	0.134669675807752	-7.44787614700026	9.48548034616646e-14	6.1665e-13
ADAMTSL4	72.5231135787448	-1.34293	0.105590032652349	-12.7183379393043	4.67702789823003e-37	3.54105e-35
ADAP2	287.798820267051	-0.74336	0.0751676684934195	-9.88935900968412	4.62982795700771e-23	7.53208e-22
ADIG	2.24729561047172	-2.16077	0.226385177205677	-9.54466714583374	1.36545371833161e-21	1.92819e-20
ADM	154.273303886182	-0.969037	0.145591914428548	-6.65584564687991	2.81675746518701e-11	1.39985e-10
ADM2	8.69683812832041	-0.916493	0.14827696942405	-6.18095626720381	6.37144667299987e-10	2.72597e-09
ADORA3	782.352608730781	-0.820265	0.0925675829770473	-8.86125780854383	7.91166691487685e-19	8.47802e-18
ADPRH	122.831866598623	-0.950926	0.0680637835679542	-13.9710947489806	2.34001842865218e-44	3.51628e-42
ADRA1D	38.6633252807122	-0.767071	0.131328862650603	-5.84084160234148	5.19377692930068e-09	2.01378e-08
ADRA2B	18.075177951088	-0.915511	0.113107373395722	-8.09417275299655	5.76548182104004e-16	4.71123e-15
ADSSL1	80.8940595916532	-0.620381	0.0847802908632341	-7.31751510234041	2.52604716092006e-13	1.56516e-12
AEBP1	3352.67249397929	-1.68223	0.143542105354602	-11.7194437764275	1.01335142271863e-31	4.19072e-30
AFAP1L1	196.385228116124	-0.588939	0.0931296746428775	-6.32386154422816	2.5510632396087e-10	1.13924e-09
AFF2	366.351257287061	0.779201	0.114836622978612	6.78530022083575	1.15845354645428e-11	6.00425e-11
AFP	1.3969440918945	-3.22315	0.432883140016979	-7.44578445909403	9.63700380334568e-14	6.26087e-13
AGBL2	9.36871478738367	-1.76546	0.159599944876161	-11.0617522880546	1.92303400732309e-28	5.51018e-27
AGPAT9	11.2545883603019	-0.618905	0.146105795676522	-4.2360040797286	2.27532644085544e-05	5.70862e-05
AGR3	1.36497862144071	-3.80437	0.755009812755194	-5.03883421290965	4.68375968850762e-07	1.45288e-06
AGTR1	4.11350954772393	-1.11652	0.154360765750589	-7.23320643611105	4.71721500329272e-13	2.84405e-12
AGTRAP	473.899540560931	-0.718421	0.0665666890283079	-10.7925035142999	3.73474647170565e-27	9.1214e-26
AHR	368.424443636138	-0.880549	0.0966161885955902	-9.11388948857647	7.94802583944762e-20	9.42511e-19
AHSG	4.94671764406078	0.830808	0.149208761222002	5.56809351661687	2.57541601298443e-08	9.26312e-08
AIF1	700.436040256341	-0.886895	0.0897919410602136	-9.87722159969208	5.22618403996036e-23	8.46032e-22
AIM1	65.4887675666769	-1.82089	0.12760263279132	-14.2699675920085	3.3673506735737e-46	6.19498e-44
AK3L1	200.625889898876	-0.655164	0.0904469934307227	-7.2436184182177	4.36869451013242e-13	2.64364e-12
AK7	11.6722960245724	-1.62259	0.186502243498219	-8.7000836219571	3.31639702765225e-18	3.35474e-17
AKAP14	2.32009412890162	-1.32746	0.277362345749606	-4.78601072525711	1.70128969253605e-06	4.95378e-06
AKNAD1	20.0227292695756	-0.683062	0.146372529424648	-4.66660153063893	3.06222363220339e-06	8.64104e-06
AKR1C1	451.312213594019	-0.634302	0.127700754269708	-4.96709922438141	6.79618191289967e-07	2.07351e-06
ALDH1A2	57.6594001057987	-0.62516	0.110629039960937	-5.65095548497938	1.59558412037742e-08	5.86866e-08
ALDH1A3	57.2274623953884	-2.29447	0.209555672687916	-10.9491990403756	6.70377623918615e-28	1.78813e-26
ALDH1L2	504.030322241268	0.673087	0.0775534421312438	8.67901190264406	3.99221923518649e-18	3.99933e-17
ALDH3A1	11.217162365684	-2.84442	0.181165561942926	-15.7006759726688	1.49639027598265e-55	7.01344e-53
ALDH3B1	218.56033198443	-0.746433	0.0706124661771404	-10.5708359179977	4.06851855945282e-26	9.09067e-25
ALMS1P	8.32846336816612	0.630852	0.0907505096106133	6.95149357246895	3.61438881995496e-12	1.97144e-11
ALOX12B	11.731291124626	1.13758	0.165991886039413	6.85321475897094	7.22085551112799e-12	3.81079e-11
ALOX12P2	4.6639717156052	-1.01845	0.176348266670932	-5.7752335315999	7.68464262951104e-09	2.91975e-08
ALOX15	2.02885905169104	-1.69347	0.269308623074098	-6.28820523468506	3.2115715806558e-10	1.41907e-09
ALOX15B	94.637305116764	-0.991533	0.188986135276515	-5.24659131872644	1.54939067859896e-07	5.09263e-07
ALOX5	252.172483542163	-1.12122	0.0986573066812889	-11.3648191985261	6.25939306836955e-30	2.08841e-28
ALOX5AP	394.998108069557	-1.33157	0.10903061906321	-12.2128097392434	2.65557142330424e-34	1.48508e-32
ALPK1	133.320673558739	-0.968381	0.0807471272208673	-11.9927582815303	3.87773877997397e-33	1.86179e-31
ALPK3	231.607288759296	-0.823446	0.0868000298936325	-9.48670493859589	2.38452636647225e-21	3.28477e-20
ALS2CR12	8.43482223027401	-0.714123	0.132998015698838	-5.36942728189414	7.89870775223875e-08	2.68775e-07
ALX4	1.97051101085212	-1.42377	0.262550037762576	-5.42286689846949	5.86506654812706e-08	2.02231e-07
AMAC1L3	0.801003363001032	0.791924	0.163224054815637	4.85175985630567	1.22370740098312e-06	3.62836e-06
AMH	136.600031044516	0.790761	0.125169371588931	6.31752487903779	2.65785663042021e-10	1.18532e-09
AMIGO2	112.78575601538	-1.39399	0.125613589174036	-11.0974423346255	1.29085143457319e-28	3.77009e-27
AMPD3	336.773134750432	-0.688564	0.0817554416011708	-8.42223654264357	3.69364367575887e-17	3.38183e-16
AMZ1	265.743830448658	1.1099	0.0955864501220016	11.611514286388	3.60179793953641e-31	1.38037e-29
ANG	41.8416786002312	-1.45604	0.0983999441590388	-14.7971201961393	1.52889680038685e-49	4.06707e-47
ANGPT1	144.52007638578	-1.30226	0.128403100130454	-10.1419378574869	3.59888353359073e-24	6.4521e-23
ANGPT2	271.560069958634	-0.755089	0.130144191227033	-5.8019428391235	6.55509099499402e-09	2.50947e-08
ANGPTL2	4743.86635103744	0.835854	0.0895240096598878	9.33664335559627	9.94365361064025e-21	1.28355e-19
ANGPTL4	408.465055446627	-0.732167	0.106636376947275	-6.86601758604221	6.60189388848586e-12	3.50197e-11
ANGPTL5	2.04572480934184	-0.64229	0.147902339018789	-4.3426622404002	1.40766461416397e-05	3.6379e-05
ANGPTL6	14.9331317257517	-0.793062	0.102663998166228	-7.72482614260431	1.12006109679059e-14	7.98855e-14
ANGPTL7	1.85725225310329	-1.49725	0.245605791428637	-6.09613359175497	1.0866461267097e-09	4.54153e-09
ANK1	334.936380864638	0.913197	0.105190076683702	8.68140095526357	3.90923396942989e-18	3.92619e-17
ANKK1	2.09470398325494	-1.78484	0.22941038285455	-7.78013807163417	7.24454378245659e-15	5.2449e-14
ANKRD1	2.16696545174126	-1.11461	0.271631240820165	-4.10339376377382	4.07133446765705e-05	9.88459e-05
ANKRD20A4	6.14316377013273	0.737679	0.158600122397277	4.65118953044897	3.30025840643054e-06	9.27417e-06
ANKRD22	130.407659832776	-1.1016	0.151665308595802	-7.26339022546875	3.77506822240884e-13	2.29926e-12
ANKRD45	68.5007160670164	-1.19647	0.11661827016498	-10.2596994372329	1.07039380938176e-24	2.03385e-23
ANKRD5	17.6846194325598	-1.03557	0.122132996232436	-8.47904838435057	2.27043252650533e-17	2.12522e-16
ANKRD53	15.7188779572748	-1.53665	0.12571520944903	-12.2232433387283	2.33576389084642e-34	1.30996e-32
ANKRD55	31.9896880968381	1.26412	0.161101314113424	7.84675664523254	4.2693455436282e-15	3.16423e-14
ANKRD58	18.6054728769942	-0.878077	0.102314365609882	-8.58214730488239	9.31182880032801e-18	8.98987e-17
ANO6	1386.76631781615	-0.663394	0.0679619023041008	-9.76126655886787	1.65080504916427e-22	2.56076e-21
ANO7	15.7616253666885	-0.680065	0.0976268864992473	-6.96595643233579	3.26180083375002e-12	1.78854e-11
ANO8	1154.12226207295	0.593269	0.0579958370338172	10.2295046735296	1.4626555978514e-24	2.74475e-23
ANO9	1.43012987876017	-2.25464	0.290482577899562	-7.7616942431733	8.38022448444584e-15	6.02941e-14
ANTXR2	294.985670440324	-0.755075	0.076231665347778	-9.90500944208879	3.95932654609746e-23	6.468e-22
ANXA1	1566.80339062112	-2.81661	0.134135698214961	-20.9982004838746	6.81171546764526e-98	4.46962e-94
ANXA13	4.60960284244816	-1.36406	0.178947844827551	-7.62268303837796	2.48456441535452e-14	1.71009e-13
ANXA2	1327.63293591565	-1.65644	0.104280206946664	-15.8845024192753	8.11392491271053e-57	4.20323e-54
ANXA2P1	8.00683343454358	-1.4438	0.115734275600855	-12.4751525488747	1.02010650848505e-35	6.64927e-34
ANXA2P2	452.450277788647	-1.86324	0.114388571113461	-16.2887203556559	1.18686660217201e-59	8.65314e-57
ANXA2P3	0.891741098375899	-1.72209	0.243479992685476	-7.07282913580066	1.51806365102673e-12	8.64172e-12
ANXA5	5299.45774117222	-0.894263	0.0656039818548326	-13.6312369981608	2.61116436944335e-42	3.40402e-40
AOAH	191.063338168441	-0.697079	0.0893029669715676	-7.80577934239052	5.91349664002737e-15	4.32258e-14
AOX1	21.986756307572	-1.79499	0.159718009212735	-11.2384981461999	2.63832523411585e-29	8.11491e-28
AP1S3	22.3563568263898	-0.618282	0.0853725233925847	-7.24216793691933	4.41568588200914e-13	2.67126e-12
AP3B2	1079.35850215493	0.617543	0.0754690225330533	8.18273700304837	2.77468300891333e-16	2.33019e-15
APBB1IP	610.512490466964	-0.901177	0.0961209324427285	-9.37544921831584	6.88818176222489e-21	9.02155e-20
APCDD1L	3.82854332834375	-3.25541	0.380150032141663	-8.56349851579529	1.09493279563196e-17	1.05243e-16
APLN	1302.17057073426	-0.744527	0.0885638601895264	-8.40666279289921	4.21841664243465e-17	3.83909e-16
APLNR	3744.83169022294	-0.760866	0.139008692338648	-5.47351639950887	4.4119203312335e-08	1.54453e-07
APOB	6.63616345889592	-1.62718	0.179891990460367	-9.04532361159013	1.4922250764032e-19	1.7118e-18
APOB48R	155.522566933107	-0.954444	0.0867792805260834	-10.9985202947323	3.8845367795757e-28	1.06204e-26
APOBEC3B	25.084159000762	-0.786516	0.120238629563799	-6.5412915737058	6.09897899824916e-11	2.92825e-10
APOBEC3C	91.5531461325822	-1.22812	0.0922951002576562	-13.3064865022834	2.1222972510139e-40	2.27051e-38
APOBEC3D	11.2235724470606	-1.14603	0.108433001454997	-10.5689695002608	4.15029886416296e-26	9.26215e-25
APOBEC3F	36.8640283729394	-1.1823	0.0897780361474461	-13.1691095160405	1.32147076972561e-39	1.29419e-37
APOBEC3G	89.9326420467942	-1.32278	0.0898070656219639	-14.7290914130952	4.19305354881739e-49	1.08606e-46
APOBEC3H	2.24362962416004	-1.54158	0.162915080249313	-9.46247111007158	3.00750184057304e-21	4.10275e-20
APOC1	2161.31973592319	-0.648454	0.0922131366451122	-7.03212027266388	2.03418332768386e-12	1.14017e-11
APOC2	612.580405709831	-1.29821	0.111928907670627	-11.5985238827065	4.19247130983824e-31	1.59015e-29
APOC4	2.86208340031333	-0.722654	0.141971665237344	-5.09013183250839	3.57814660606834e-07	1.12914e-06
APOH	1.69742211296552	-1.84051	0.391869365309506	-4.69675443177125	2.64327920869064e-06	7.5062e-06
APOL1	281.590499299672	-1.35736	0.0994783284426815	-13.6447623466162	2.16919513010206e-42	2.9048e-40
APOL4	247.461643025735	-1.71916	0.155154662332432	-11.0803116879605	1.56327401388285e-28	4.53211e-27
APOL6	674.617321604894	-0.654313	0.0801653905107601	-8.16203306685746	3.29431980451281e-16	2.75016e-15
AQP1	12493.2545543515	-1.71998	0.1512130625398	-11.3745758284509	5.59743221796338e-30	1.88674e-28
AQP3	40.0751760003487	-0.717025	0.144178526350479	-4.97317212958869	6.58661281566785e-07	2.01144e-06
AQP5	27.3035704344192	-2.24992	0.286737111913584	-7.84663334888896	4.27354312866319e-15	3.16615e-14
ARAP3	307.916509946934	-0.887185	0.0921309185144543	-9.62960823575159	5.99576298841266e-22	8.80795e-21
ARHGAP11A	164.858501427952	-0.687434	0.107881257155114	-6.37213686057917	1.86412417796462e-10	8.46098e-10
ARHGAP11B	11.6390665785275	-0.633076	0.133620101683232	-4.73787992426466	2.15965708735778e-06	6.20173e-06
ARHGAP15	45.5729018991981	-1.20776	0.106287969497678	-11.3631341567983	6.38133975562081e-30	2.12549e-28
ARHGAP18	219.670211184961	-1.0167	0.0813135009956393	-12.5034141276658	7.15127404221882e-36	4.85424e-34
ARHGAP25	226.667173645921	-0.814951	0.0715915893749582	-11.3833402735166	5.06228993352997e-30	1.71222e-28
ARHGAP30	358.880957188632	-0.78636	0.0793564893437709	-9.90921167238568	3.79629676705849e-23	6.22232e-22
ARHGAP9	136.815695625255	-0.834148	0.0832302740839561	-10.0221723395084	1.21796000181187e-23	2.07222e-22
ARHGDIB	1400.12369979639	-0.855677	0.0702596068818791	-12.1787919453024	4.03209905562078e-34	2.18655e-32
ARHGEF16	19.133256518956	-0.72798	0.116041233596391	-6.27346316566049	3.53104492386079e-10	1.55222e-09
ARHGEF19	32.9655178168766	-0.583779	0.087388118930018	-6.68030204047552	2.38450282649929e-11	1.19255e-10
ARHGEF35	9.0508665607643	-0.583539	0.110377879504567	-5.28674182248418	1.24514179330784e-07	4.14171e-07
ARHGEF5	12.8145009491386	-0.801986	0.124957011842845	-6.41809418698415	1.37990878016306e-10	6.35701e-10
ARID5A	555.90202238616	-0.592858	0.0769820418859952	-7.70124527824616	1.3474655896978e-14	9.54132e-14
ARL10	138.518232777953	0.680279	0.0662269218305288	10.2719360392488	9.42930728452469e-25	1.80035e-23
ARL11	39.2725677104296	-1.0109	0.0881540507102367	-11.467383542495	1.92388562129013e-30	6.7749e-29
ARL9	4.48868418335413	-1.79916	0.247409993542896	-7.27199058340706	3.54228294569415e-13	2.16485e-12
ARMC3	33.4803923960429	-1.88345	0.206388873532992	-9.12572622889353	7.12568845875715e-20	8.49601e-19
ARMC4	24.4772822312635	-0.882719	0.131735987255008	-6.70066345483138	2.07475377034939e-11	1.04561e-10
ARNTL2	39.2927162987402	-0.674801	0.108867872514104	-6.19834399943423	5.706032224544e-10	2.45408e-09
ARPC1B	1040.40972000326	-0.849014	0.0751319623003919	-11.3003036075339	1.30765125604787e-29	4.17875e-28
ARPP21	897.320485116993	0.857349	0.0881022781548775	9.73129307543808	2.21755852713964e-22	3.40239e-21
ARRDC4	1088.69590277149	-0.60552	0.0714425913634411	-8.47561578083349	2.33839321420958e-17	2.18676e-16
ARSD	333.501438567009	-0.893683	0.0906427840113653	-9.85939104262802	6.2426844995368e-23	1.00234e-21
ARSE	51.33501952611	-0.75739	0.0977219345745387	-7.75046490447578	9.15567218277408e-15	6.57772e-14
ARSF	59.3180066441287	-1.33445	0.193503295708011	-6.89626608116435	5.33871586076425e-12	2.85655e-11
ARSI	54.9522676793607	-1.12323	0.121740768195278	-9.22642467405858	2.79816014255193e-20	3.47739e-19
ARSJ	80.1988688967482	-0.959163	0.130568141682992	-7.34606979545924	2.04119817115422e-13	1.2768e-12
ART3	40.2726156286429	-0.68883	0.139332217446109	-4.94379795443058	7.66151079424408e-07	2.3224e-06
ASAH2	4.04625210750455	0.6846	0.120301694485942	5.69069028165941	1.26526825730283e-08	4.70383e-08
ASAH2B	8.81269495596704	0.621279	0.131989082249582	4.70705089869881	2.51326172547129e-06	7.15867e-06
ASB5	14.3831949571823	-1.56611	0.192962203098177	-8.1161331988246	4.81272445798804e-16	3.96064e-15
ASB9	8.55218076745656	-0.622506	0.0941224495658426	-6.61378417279602	3.74617812033115e-11	1.84319e-10
ASCL2	9.37501133499298	-1.24363	0.108254848307262	-11.4880048893711	1.51572070334188e-30	5.4447e-29
ASF1B	112.854200574276	-1.11289	0.127941045841569	-8.69845273589877	3.36439883359701e-18	3.40155e-17
ASGR2	6.81369466377418	-1.24858	0.133820604867027	-9.33021849524074	1.056528803751e-20	1.36111e-19
ASIP	6.98357871752418	-0.671045	0.161448199052509	-4.15640758699081	3.23290853427686e-05	7.94009e-05
ASPM	136.5016297774	-1.1647	0.163063656365727	-7.14263969201961	9.15553928857847e-13	5.34322e-12
ASPN	23.2615296218357	-1.34294	0.129396499053913	-10.3785091953599	3.10587192546364e-25	6.25784e-24
ATAD3C	34.3044546494426	-0.877746	0.117196958110059	-7.48949504831496	6.91390925173621e-14	4.54122e-13
ATCAY	5072.03799097333	1.02206	0.10308310586654	9.91486724848037	3.58733020812483e-23	5.88472e-22
ATF3	410.192914129968	-0.912724	0.114808738689054	-7.9499541698873	1.86580526956356e-15	1.44429e-14
ATG9B	27.4174653771082	-0.647295	0.121862566485602	-5.31167880809911	1.08619922008874e-07	3.6376e-07
ATOH8	1831.86358750797	0.717219	0.10233271910926	7.00869484712163	2.40551452252013e-12	1.3384e-11
ATP1A4	6.08259788503856	0.725763	0.158001756076136	4.59338728645498	4.3610861649104e-06	1.2059e-05
ATP2A3	72.4794695619238	-0.85213	0.101417329862523	-8.40220848676082	4.38159027794203e-17	3.98207e-16
ATP8A2	122.035301622874	0.798395	0.170906655022918	4.67152942191126	2.98965264595654e-06	8.44715e-06
ATP8B1	38.2832253782756	-0.663183	0.0959813619583021	-6.90950136638881	4.8636018670717e-12	2.61585e-11
ATP8B4	133.146446099656	-0.680217	0.0895649043634042	-7.59468376449138	3.08545002851323e-14	2.10527e-13
AURKA	90.7344987154758	-0.820613	0.092673683410063	-8.85486721450815	8.37834921559844e-19	8.95374e-18
AURKB	78.5178086424291	-0.928914	0.172681499141044	-5.37934942541704	7.47554889375627e-08	2.54966e-07
AURKC	17.8279870710782	-0.637803	0.109445995595829	-5.82756295176387	5.62426370864821e-09	2.17171e-08
AVIL	63.2821651399333	-0.902673	0.115356221453806	-7.82509536277259	5.07272238521587e-15	3.72738e-14
AZU1	2.90639334927514	1.06619	0.182433721206194	5.84427687675214	5.08773459943826e-09	1.97617e-08
B2M	22003.2722190684	-0.693331	0.0655025235895347	-10.5847933308934	3.50553488001968e-26	7.89548e-25
B3GNT5	222.636933740723	-1.11822	0.0986342772046109	-11.3370477524422	8.59968094888565e-30	2.80273e-28
B3GNT7	99.368044108494	-1.6559	0.133072293599544	-12.4436203985984	1.51479100946615e-35	9.65005e-34
B3GNT8	6.05640643770799	-0.973062	0.113911769586537	-8.54224207022035	1.31642297198133e-17	1.25612e-16
B9D2	78.3818958400899	-0.610636	0.0667174522771536	-9.15256307069736	5.55984669454537e-20	6.70212e-19
BACE2	155.790622535701	-0.901615	0.0776498753955916	-11.6112884667432	3.61132377110047e-31	1.38037e-29
BAI3	1241.96326512795	0.694438	0.0652093270855504	10.6493650735786	1.75558358460491e-26	4.06095e-25
BANK1	13.9355729406528	-1.87328	0.166017063840857	-11.2836306012157	1.58084239914518e-29	5.01109e-28
BARHL1	12.684976292785	1.41382	0.282349930129259	5.0073429911274	5.51865353619162e-07	1.70034e-06
BATF	12.4371922418454	-1.75016	0.143165148148743	-12.2247342979403	2.29330297945741e-34	1.28982e-32
BATF3	56.5868738106001	-1.09818	0.103877257418843	-10.5719110116145	4.02213868263173e-26	9.00749e-25
BCAS4	439.708292201482	-0.605917	0.0645273946631042	-9.39006825336616	5.99613886935523e-21	7.91643e-20
BCAT1	621.29056258156	-1.24125	0.122907386503431	-10.0990950399073	5.57543022449281e-24	9.76444e-23
BCL2A1	42.1567662581073	-1.30108	0.146830904445741	-8.86110136797384	7.92277856990472e-19	8.4853e-18
BCL2L12	56.1678602248159	-1.10123	0.0852410161495221	-12.919047752565	3.51464184472023e-38	3.00807e-36
BCL2L14	1.91476774603941	-1.01721	0.161359319684365	-6.30398944735412	2.90080252657326e-10	1.28754e-09
BCL3	121.482940864657	-0.660348	0.079844982693225	-8.27038096111327	1.33531640721697e-16	1.1544e-15
BCL7A	1294.20833906897	0.6129	0.0586953176441028	10.4420543036052	1.59324958928099e-25	3.31885e-24
BCL8	3.04058154857858	0.918955	0.148387294122407	6.19294920335741	5.90487636580186e-10	2.53351e-09
BCMO1	41.8720950253968	-0.928621	0.107095461113836	-8.67096768203187	4.28463319557161e-18	4.2879e-17
BCO2	53.7094853704574	-0.77014	0.091015747141094	-8.46161242511289	2.63705672001385e-17	2.45905e-16
BDKRB1	1.011639612009	-1.65811	0.224148083044184	-7.39738795497369	1.38889336306351e-13	8.86236e-13
BDKRB2	31.1468936668878	-1.40862	0.13979652765171	-10.076187220059	7.04053137062598e-24	1.22216e-22
BEND4	44.8552916966491	1.04238	0.13313425670549	7.82956433575626	4.89563425254613e-15	3.60533e-14
BEST4	11.6062790029648	-1.1651	0.129348289624555	-9.00748023016482	2.10845052606866e-19	2.39359e-18
BGN	2075.8580003512	-0.870887	0.103527169900375	-8.41215462651574	4.02546731386877e-17	3.67028e-16
BHLHE41	1908.3889012652	-0.727753	0.0800563941870725	-9.09050903892199	9.85764387679043e-20	1.15642e-18
BHMT2	42.2349026598612	-0.628441	0.11566742360593	-5.43317382144968	5.53604321614122e-08	1.91692e-07
BIK	1.62632799786802	-0.739114	0.154963603262059	-4.76959742378569	1.84594451700755e-06	5.35003e-06
BIN2	201.83506914181	-0.70128	0.0854218053303259	-8.20961072577983	2.21906745935356e-16	1.88367e-15
BIRC3	48.7064500927735	-0.996054	0.108183722756458	-9.2070639582905	3.35166992235365e-20	4.14172e-19
BIRC5	134.857908220268	-0.930857	0.159276011927813	-5.844302928367	5.086938525547e-09	1.97617e-08
BLK	4.83648578775153	2.08027	0.22777330285616	9.13305246674937	6.65945716120228e-20	7.95941e-19
BLNK	123.015734016817	-0.953465	0.106837301978518	-8.9244589572663	4.47883052894929e-19	4.91174e-18
BMP2	1367.34554990589	0.959949	0.103713615578953	9.25577001909166	2.12691749626983e-20	2.66508e-19
BMS1P5	69.0048917907803	0.721341	0.0684570202148435	10.5371405484843	5.82429076773751e-26	1.27816e-24
BOK	755.061527547047	-0.649761	0.125634132846154	-5.17184756680056	2.31790641463694e-07	7.47387e-07
BRCA1	230.716663858604	-0.662912	0.0619466237025234	-10.7013435981902	1.00312994369615e-26	2.37625e-25
BRCA2	47.1585991239243	-0.769741	0.116950762492381	-6.58175165284216	4.64937735128645e-11	2.26151e-10
BRIP1	33.7218786704613	-1.01425	0.146744252002833	-6.91167805989333	4.78953851127174e-12	2.57883e-11
BRSK2	900.289872747527	0.68955	0.0723566289965438	9.52987913766051	1.57466449856988e-21	2.20464e-20
BRWD3	194.990719453946	0.599759	0.0778799909250639	7.70106708894791	1.34934618414812e-14	9.5512e-14
BSN	1775.81211551488	0.761909	0.106014927061959	7.18680805720083	6.63235453439228e-13	3.93721e-12
BST1	31.8065503326731	-0.951071	0.0925064683383546	-10.2811310320391	8.57157435858428e-25	1.64616e-23
BST2	841.169152539941	-1.10913	0.0962424936991971	-11.5243300302526	9.94830260575885e-31	3.64678e-29
BTBD16	6.00446296855347	-1.03544	0.176920704917085	-5.85254430518292	4.84109224402633e-09	1.88557e-08
BTBD17	737.988566259048	0.859965	0.107919347279044	7.96859259427626	1.6049159515526e-15	1.25219e-14
BTK	170.52178749363	-0.891817	0.0885978602512403	-10.0658979446247	7.81707018147408e-24	1.35338e-22
BTLA	2.82971789288612	-1.02424	0.152695659914596	-6.70771595910189	1.97694260860969e-11	9.999e-11
BTN1A1	0.818795566539321	-1.65585	0.288857097268786	-5.73240785625958	9.90148276330244e-09	3.72322e-08
BTN2A2	226.614503516203	-0.71226	0.0677837174556026	-10.507833814047	7.94985707513683e-26	1.71593e-24
BTN2A3	11.8849877587886	-0.620929	0.0910633804302168	-6.81864213624115	9.19050191143995e-12	4.81541e-11
BTN3A2	934.326527428827	-0.645282	0.0821219565792668	-7.85760864743725	3.91536353008382e-15	2.91836e-14
BUB1	127.010791275397	-0.932774	0.140109989302007	-6.65743987910118	2.78638321931179e-11	1.3851e-10
BUB1B	121.443846871923	-0.918306	0.147763037599031	-6.21471854175109	5.14167279083967e-10	2.22546e-09
BVES	214.92731329905	-0.664513	0.100292233136723	-6.62577039738778	3.45441758479312e-11	1.70512e-10
BZRAP1	1979.51689776799	0.800596	0.0750453296895246	10.6681704541426	1.43422496259604e-26	3.35704e-25
C10orf10	859.231543685764	-1.03332	0.101750504469392	-10.1554289789182	3.1342873990311e-24	5.64897e-23
C10orf105	173.907282776898	-1.7237	0.160691245099744	-10.7268031270005	7.61864341276912e-27	1.82006e-25
C10orf107	65.2255691327261	-0.82625	0.119154730182471	-6.93425886495138	4.08356297605113e-12	2.21568e-11
C10orf11	24.0070500827247	-1.10878	0.102134451015839	-10.8560900578076	1.86567351683133e-27	4.70843e-26
C10orf114	48.6216585807871	-0.586788	0.103776042867907	-5.65437211915174	1.56417003651259e-08	5.76075e-08
C10orf125	52.8112487114758	-0.769909	0.089970896601742	-8.55731133582227	1.15530227534954e-17	1.10775e-16
C10orf140	31.8520410389933	-0.606375	0.119730425483025	-5.06450132120173	4.0947079821231e-07	1.28106e-06
C10orf55	4.28337956366673	-1.30261	0.169617724284156	-7.67970280394626	1.59458088542353e-14	1.12105e-13
C10orf67	1.76858603340513	-1.03169	0.200691640411057	-5.14065463507274	2.73782891919623e-07	8.75332e-07
C10orf79	55.2333975299352	-1.52743	0.136671196944841	-11.1759182245447	5.34942398407518e-29	1.61508e-27
C10orf81	15.1547986181026	-2.79313	0.275484150820676	-10.1389760515247	3.70967543505597e-24	6.6326e-23
C10orf95	3.63793466175775	0.627874	0.0936750675744537	6.70267916760997	2.04632431432100e-11	1.0326e-10
C11orf20	21.4501827023413	0.661966	0.114590403299681	5.77680052642509	7.61344560004129e-09	2.89326e-08
C11orf21	5.11283661896687	-1.4455	0.138511691185672	-10.4359385202199	1.69926177657813e-25	3.52848e-24
C11orf35	4.59626675500611	-0.944059	0.128379733312206	-7.35364773441465	1.92869616654271e-13	1.20874e-12
C11orf42	1.74574734332507	1.00185	0.128305624840061	7.80830767269919	5.7960955756636e-15	4.24149e-14
C11orf45	32.7824436718417	-0.755872	0.0869195250222248	-8.69622517838146	3.43107242793951e-18	3.46718e-17
C11orf63	34.6579322542579	-1.90377	0.161662494412036	-11.7761960576462	5.17774328979174e-32	2.20614e-30
C11orf70	39.8185109636474	-1.03955	0.136864811041381	-7.59543414125764	3.06762219018248e-14	2.09383e-13
C11orf82	59.4150863115163	-0.773959	0.100747532737222	-7.6821659678761	1.56420998994309e-14	1.10009e-13
C11orf86	1.11337008715409	-1.68644	0.287214676949249	-5.87169209045569	4.31369381684374e-09	1.69019e-08
C11orf88	4.5300691132006	-4.27775	0.357268677701651	-11.9734698380589	4.89383266539628e-33	2.31019e-31
C12orf39	51.5040719412663	-0.963357	0.156971103434025	-6.13715920003115	8.40101874113093e-10	3.54412e-09
C12orf48	36.361487932454	-0.692245	0.0872351223174033	-7.93538765298889	2.09838865441569e-15	1.61105e-14
C12orf59	47.023097612778	-0.865834	0.102682968507891	-8.43211253065394	3.39480293848129e-17	3.12274e-16
C12orf63	13.6620939909939	-1.66164	0.181452004887372	-9.15748199460891	5.3122342008879e-20	6.41149e-19
C13orf18	148.876015744526	-1.089	0.109262482698975	-9.96682957860146	2.12917002792089e-23	3.56401e-22
C13orf26	14.5535755589954	-2.19928	0.219422521599778	-10.0230252909058	1.20749148259083e-23	2.05618e-22
C13orf29	22.7904502975674	-0.96638	0.0996312575824881	-9.6995692774806	3.0277407743659e-22	4.57414e-21
C13orf30	2.49592872812669	-2.39354	0.389917004811531	-6.13859325118984	8.32554356144263e-10	3.51465e-09
C13orf31	144.583955437433	-0.7171	0.102410496067607	-7.00221312669705	2.51950411066917e-12	1.39905e-11
C13orf33	10.4918304865947	-1.17626	0.173686943553394	-6.77230815592979	1.26743813324469e-11	6.53813e-11
C14orf106	180.802326444092	-0.60662	0.0763061193388794	-7.94982638590705	1.86773078419729e-15	1.44522e-14
C14orf174	25.8030037467442	-0.66978	0.0928718118058711	-7.21187086974444	5.51882985375743e-13	3.30207e-12
C14orf178	3.02513121182661	0.643109	0.0978489050494398	6.57246566504501	4.94888019570289e-11	2.39948e-10
C14orf181	15.5518040202929	-0.664109	0.101756269683689	-6.52646404237697	6.73404734844922e-11	3.21279e-10
C14orf50	8.84470012756431	-1.6781	0.14074358409135	-11.9230784055277	8.97306020271297e-33	4.06992e-31
C14orf86	13.8689506790244	-1.07148	0.151679495733056	-7.06407336875833	1.61691302156233e-12	9.1726e-12
C15orf26	4.41843334833181	-2.7755	0.255812200114172	-10.849771428208	1.99924675421965e-27	5.03263e-26
C15orf28	4.98780213759524	0.692368	0.0961946689101013	7.19757442597732	6.12930950307504e-13	3.65512e-12
C15orf39	618.95514497367	0.616764	0.060558220642606	10.1846425977749	2.32211593233782e-24	4.22857e-23
C15orf48	2.76015658482873	-1.16427	0.197987308801406	-5.88052097909535	4.08977165056972e-09	1.60629e-08
C15orf50	0.546959198360447	1.49381	0.240394750306558	6.21399822080652	5.16531129548212e-10	2.23372e-09
C15orf51	6.47369106957457	-0.906474	0.148005983743962	-6.12457391069406	9.09265991377412e-10	3.82455e-09
C15orf56	2.9097036261285	-1.33751	0.133534399391921	-10.0161949106623	1.29388788604961e-23	2.1976e-22
C15orf62	30.9946478402513	0.590739	0.0635986846309395	9.28854819115354	1.56407098176515e-20	1.97617e-19
C16orf54	18.1369653640578	-1.17821	0.0974004401691144	-12.0966032575582	1.10072149777385e-33	5.67217e-32
C16orf71	31.4479699077713	-0.652532	0.0844883341747468	-7.72334298726545	1.13317713729119e-14	8.07643e-14
C16orf74	22.0790468235856	-0.670966	0.106104928403402	-6.32360704946485	2.55527035374516e-10	1.14086e-09
C16orf75	70.6172925250891	-0.616369	0.104171370357578	-5.91687753309199	3.28110810625686e-09	1.30448e-08
C16orf89	201.466414330483	-1.03743	0.116975783749492	-8.86879497822205	7.39416701998859e-19	7.95378e-18
C17orf102	27.3351082325903	0.670993	0.127520118278564	5.26185718586313	1.42607521392185e-07	4.70617e-07
C17orf60	25.7496927539445	-1.08019	0.103933182088466	-10.393152816739	2.66398562943215e-25	5.39512e-24
C17orf72	59.79398346621	-1.59538	0.133604024123234	-11.9411303240038	7.2234816369675e-33	3.34575e-31
C17orf87	18.6302962314572	-1.116	0.109936466707427	-10.1512932893021	3.27000911245601e-24	5.87855e-23
C19orf18	15.7026675884802	-0.700575	0.107775809846092	-6.50029909778776	8.01604751146126e-11	3.79226e-10
C19orf35	24.8358170348606	-0.892009	0.0985655324898565	-9.04990899432785	1.43087542756046e-19	1.6443e-18
C19orf38	46.531780157989	-0.775781	0.0830736745391075	-9.33847269041317	9.77337003923768e-21	1.26322e-19
C19orf40	16.9762148747417	-0.701205	0.0698305577663272	-10.0415252673242	1.00113974531021e-23	1.71369e-22
C19orf51	31.6984233305598	-1.88924	0.151509932525614	-12.4694431855864	1.09589127317852e-35	7.11968e-34
C1orf110	3.84356359332172	-2.22726	0.242436663785786	-9.18697278001393	4.040519747092e-20	4.93104e-19
C1orf127	1.75674238675293	-1.00454	0.17317970643053	-5.80055882799739	6.60942810232646e-09	2.5288e-08
C1orf130	14.5810686208165	-1.1497	0.15651964584329	-7.34537756109858	2.05179078578807e-13	1.28221e-12
C1orf133	17.547780859756	-0.971375	0.114538242953286	-8.4807925561399	2.236650853076e-17	2.09759e-16
C1orf158	9.28655793595019	-3.89573	0.324178984930812	-12.0172325140992	2.88471997095829e-33	1.4161e-31
C1orf162	199.464908431242	-1.04958	0.0965842598641601	-10.8669827644202	1.65586585387318e-27	4.21678e-26
C1orf182	1.03427876717058	-0.737117	0.161661472200675	-4.55963567143777	5.12424429238836e-06	1.40449e-05
C1orf192	163.987573943799	-1.41782	0.129579629372976	-10.9417011950827	7.2820492327248e-28	1.93451e-26
C1orf194	80.6183557663329	-1.46575	0.144728389367865	-10.1276254158469	4.16644477875194e-24	7.40221e-23
C1orf200	1.1064432388952	-1.23963	0.194998504482471	-6.35710995770169	2.05584836559749e-10	9.2841e-10
C1orf201	118.139424400394	-0.704121	0.12383757644856	-5.68584212590308	1.30169605928754e-08	4.83105e-08
C1orf220	13.7799545995784	0.897972	0.0868153126302701	10.3434731780153	4.48000265400862e-25	8.8543e-24
C1orf230	15.5698511588055	0.7939	0.136118639390763	5.83241533924985	5.46307255040795e-09	2.11278e-08
C1orf38	393.172746220566	-0.831681	0.0883265742554424	-9.41597979383291	4.68690437297753e-21	6.27631e-20
C1orf54	161.049104132218	-0.722133	0.0762753054928158	-9.46745365284328	2.86748381785407e-21	3.92261e-20
C1orf65	2.91597760849315	1.00688	0.169525391079548	5.9393992088944	2.86068487734508e-09	1.14247e-08
C1orf85	390.583867691682	-0.759291	0.0637515526580499	-11.9101552645341	1.04781967592477e-32	4.73081e-31
C1orf87	8.73576632849293	-3.17002	0.265323310556193	-11.9477749496261	6.66867964651043e-33	3.11073e-31
C1orf88	308.435663672246	-1.74181	0.114253082921922	-15.2452264167564	1.77117916039702e-52	6.22601e-50
C1orf92	1.08363523830306	-2.40467	0.444633033402816	-5.40820830935996	6.36583593056643e-08	2.18808e-07
C1orf95	547.015389959665	0.71431	0.11010322413722	6.4876360937627	8.71935686272056e-11	4.1082e-10
C1QA	2720.0728804639	-1.09777	0.0997816079231769	-11.0017688781843	3.74708507755453e-28	1.02589e-26
C1QB	4012.78412410223	-1.15647	0.100776443261655	-11.475565665062	1.75029279023915e-30	6.27587e-29
C1QC	3573.31822337182	-1.00911	0.0958640360721819	-10.5264684799922	6.52361842005698e-26	1.42212e-24
C1QTNF1	1035.54478765482	-0.585825	0.115050650931218	-5.09188783283806	3.54515821794123e-07	1.11927e-06
C1R	1814.3695204376	-1.88362	0.114209191229596	-16.4927376583338	4.13769266754738e-61	3.13271e-58
C1RL	247.137519933574	-1.5559	0.0957041239341158	-16.2573672871419	1.98067756119151e-59	1.29965e-56
C1S	1563.05313677033	-1.66951	0.110384175181094	-15.1245174446378	1.11615811783827e-51	3.6019e-49
C2	317.933465632188	-1.24867	0.111383635469388	-11.2105307519371	3.620160359405e-29	1.10657e-27
C20orf134	4.56986807892927	-1.02956	0.109852873140416	-9.37216142341984	7.10621308267401e-21	9.29474e-20
C20orf195	1.67979367519211	-2.20721	0.249036125843211	-8.86299181231433	7.78953031331982e-19	8.35623e-18
C20orf197	6.53210556271032	-0.785987	0.115143305866507	-6.82616632409281	8.7213810971278e-12	4.5757e-11
C20orf201	9.58931943954793	0.65046	0.137108861632067	4.7441120857971	2.09422873871101e-06	6.02439e-06
C20orf203	24.2927410308909	0.775623	0.100207727588494	7.7401517572471	9.92982198207256e-15	7.10536e-14
C20orf26	38.0955504697262	-1.70305	0.125750138572543	-13.5431329959545	8.699778501718e-42	1.05065e-39
C20orf30	1687.66044248264	-0.652786	0.024063674168733	-27.1274362993145	4.67483422310877e-162	9.20241e-158
C21orf121	3.67766883715857	-1.4419	0.192113643767127	-7.50543009975264	6.12272357198405e-14	4.05538e-13
C21orf125	14.7808889903724	1.9487	0.119959522382984	16.2446731421474	2.43636486331373e-59	1.54709e-56
C21orf130	21.2743454290191	-0.89639	0.155433307326393	-5.76703877232674	8.06764970851683e-09	3.05642e-08
C21orf62	386.153805664285	-1.39103	0.133159459250504	-10.4463687226702	1.52243214090589e-25	3.18143e-24
C21orf63	204.393291614512	-1.19635	0.0867015688204896	-13.7985148250175	2.60157258931655e-43	3.68431e-41
C21orf7	85.1974003743907	-2.01739	0.126941988295508	-15.8922358036605	7.17231083354261e-57	3.81586e-54
C21orf84	0.580245172012384	1.4376	0.265902333980085	5.40649271433895	6.42708404394388e-08	2.20836e-07
C21orf88	29.7308059006634	-0.941583	0.101150014606617	-9.30878252923824	1.29305972090299e-20	1.64964e-19
C22orf15	1.24013976837078	-1.53843	0.2359275148973	-6.52075643448662	6.99536998762117e-11	3.33262e-10
C22orf36	355.022387625689	0.595799	0.0612931717878462	9.72048116712858	2.46613350305849e-22	3.76909e-21
C2CD4A	5.82398481139599	-0.89543	0.217514059635684	-4.11665517860524	3.84410538934956e-05	9.35252e-05
C2orf27A	163.492213989339	0.681363	0.0958446151320841	7.10903888954396	1.16853820435297e-12	6.72593e-12
C2orf39	33.7082582553381	-3.3075	0.270185917175894	-12.2415694875813	1.86393027148365e-34	1.06045e-32
C2orf40	67.1406280561375	-1.3843	0.135658139794138	-10.2042996105	1.89684730710205e-24	3.50935e-23
C2orf50	13.8382722480828	-1.05364	0.183246717309697	-5.74986167947494	8.93164904215464e-09	3.37142e-08
C2orf62	6.20838504392397	-1.59903	0.210448600142249	-7.59817800077317	3.00329052238225e-14	2.05063e-13
C2orf66	3.61764351976186	-1.04922	0.163923084128891	-6.40067379487007	1.54692755407601e-10	7.07382e-10
C2orf70	1.70196055651693	-2.2365	0.357737049297501	-6.25178482390535	4.05788228537674e-10	1.77273e-09
C2orf73	5.458835051076	-0.649191	0.116873313338328	-5.55465377449093	2.78162545524021e-08	9.95207e-08
C2orf77	163.297109352409	-0.963032	0.0848672630848196	-11.3475105925705	7.63042847017838e-30	2.49096e-28
C2orf85	547.03647293879	1.27513	0.125888765658083	10.1289865250247	4.10885945469888e-24	7.30649e-23
C3	10969.9946171571	-1.389	0.110506183657589	-12.5694614447688	3.10834059749724e-36	2.18527e-34
C3AR1	596.47952333908	-0.836563	0.0983753167116171	-8.50378924426999	1.83500542888622e-17	1.7358e-16
C3orf15	114.859900016249	-0.860924	0.111365458939136	-7.73062234632692	1.07022077573567e-14	7.64693e-14
C3orf16	4.29071138171094	-1.96988	0.279099926031418	-7.05797967734522	1.68940758831021e-12	9.56181e-12
C3orf36	0.845765872975228	-1.4739	0.265804784589811	-5.54505691495995	2.93858568942342e-08	1.04889e-07
C3orf52	5.17456519387847	-2.01295	0.190809302922143	-10.5495234811018	5.10553693465689e-26	1.12419e-24
C3orf57	103.70711740643	-1.00466	0.13627989896099	-7.37206725805097	1.68002214764226e-13	1.05828e-12
C3orf66	5.21468184273593	-1.13096	0.194431522855736	-5.81675741372037	6.00001171096032e-09	2.30819e-08
C4A	11967.0987963907	-0.899538	0.114034780005449	-7.88827544049711	3.06390938862865e-15	2.30027e-14
C4orf31	128.613784037266	-1.04603	0.159457871316334	-6.55992501760067	5.38348414658894e-11	2.59995e-10
C4orf38	3.56388551077724	-0.645223	0.0918394347358564	-7.02554997190338	2.13224679042549e-12	1.19276e-11
C4orf47	19.2003835372977	-1.32736	0.125652776222098	-10.563711204397	4.38956615742066e-26	9.74167e-25
C4orf49	28.0833156081965	-0.98258	0.100194610375702	-9.80671242076424	1.05344805640708e-22	1.66831e-21
C4orf6	0.543873273841664	-1.63857	0.391286097182532	-4.18765444378618	2.81852216291649e-05	6.97894e-05
C5AR1	189.156472100079	-0.956642	0.119858175251283	-7.98145012197922	1.44624019876229e-15	1.13423e-14
C5orf20	3.00757199371247	-1.4446	0.188416367849493	-7.66707372720863	1.75964643474671e-14	1.23269e-13
C5orf23	23.8638746058518	-0.661951	0.145028893765324	-4.56427149422037	5.01231801713745e-06	1.37666e-05
C5orf32	627.381022373496	-0.710694	0.0673891562243457	-10.546114476346	5.29414143606608e-26	1.16442e-24
C5orf34	31.2392175920502	-0.60391	0.087014499226406	-6.94033442323773	3.9117281395238e-12	2.12714e-11
C5orf39	57.4205708183384	-0.629186	0.0880768483565212	-7.1436055909202	9.0914023695942e-13	5.30894e-12
C5orf49	72.3363748157793	-1.89518	0.171649474350305	-11.0409865020759	2.4235755882792e-28	6.81544e-27
C5orf62	366.052783757331	-0.920039	0.0799754652364407	-11.5040146981527	1.25919143667011e-30	4.58173e-29
C6	6.3042345444032	-2.94518	0.295929258052942	-9.95230690928955	2.46403907732861e-23	4.09667e-22
C6orf103	0.847594995655964	-2.95318	0.675639394560383	-4.37093830044129	1.2371375067558e-05	3.2179e-05
C6orf115	103.927399775873	-0.784823	0.0672903969447874	-11.6632212390151	1.96466245753964e-31	7.79725e-30
C6orf118	19.8312984609859	-1.48584	0.152780865360484	-9.72528406877137	2.3524784925926e-22	3.60098e-21
C6orf124	25.618211493658	0.618242	0.0877422455636721	7.04611813232604	1.83978078821792e-12	1.03593e-11
C6orf132	0.556659279480998	-1.3279	0.293868795036108	-4.51867869088885	6.22267436078489e-06	1.68492e-05
C6orf141	10.6259191432742	-1.81771	0.205441095715668	-8.84785834904432	8.92147884540387e-19	9.49294e-18
C6orf15	6.05188928889806	-6.00867	0.700611551798722	-8.57632114479971	9.79558022901909e-18	9.443e-17
C6orf150	18.0403010302837	-1.01099	0.0928780327087489	-10.8851228312143	1.35715542332806e-27	3.50139e-26
C6orf165	22.7210623968986	-1.46528	0.126656883307664	-11.5689289533698	5.92172667328217e-31	2.20775e-29
C6orf174	2407.69713398114	0.613289	0.0663860295051633	9.23822757903752	2.50614015883384e-20	3.13029e-19
C6orf186	3.04183206215096	-1.14014	0.214141511542158	-5.32422041440267	1.01386909789355e-07	3.40697e-07
C6orf208	15.9457025290561	0.76943	0.111585845746963	6.89541028234611	5.37095622172194e-12	2.87068e-11
C7	137.412848245844	-1.05043	0.144576113630508	-7.26561457317195	3.71346022561528e-13	2.26525e-12
C7orf29	23.4893979987983	-1.25723	0.111853619613767	-11.239968591886	2.59474647674668e-29	8.00589e-28
C7orf31	74.3616480741357	-0.96427	0.0753986902569253	-12.7889497067054	1.89010990609199e-37	1.49425e-35
C7orf52	150.754990064032	0.666368	0.118196697949381	5.6377920368511	1.7224434088404e-08	6.31637e-08
C7orf57	34.8397443944442	-4.10727	0.22775350091554	-18.0338409647189	1.05688274076021e-72	2.08047e-69
C7orf58	90.4411886627582	-0.769025	0.105439180946355	-7.29353951344817	3.01916117213055e-13	1.85494e-12
C8orf12	17.2864442548543	-0.780108	0.143063186427287	-5.45289076372614	4.9557514333309e-08	1.72815e-07
C8orf34	65.0973358790811	-1.53984	0.160033200221842	-9.62203004004015	6.45445459640825e-22	9.46061e-21
C8orf4	319.42350200214	-1.04728	0.122640986743754	-8.53940291555084	1.34917160826644e-17	1.28612e-16
C8orf48	21.3410697297727	-0.616025	0.0755551834774734	-8.15331829135549	3.5407210350062e-16	2.9521e-15
C8orf51	18.4281045684849	-0.645922	0.0736216743727429	-8.77353654208739	1.73140724153865e-18	1.80141e-17
C8orf79	200.957905590227	0.635323	0.128897696025446	4.92889592342934	8.26956100770242e-07	2.49787e-06
C8orf80	0.43003742994673	-1.73284	0.415639904804378	-4.16908228422074	3.05828570814512e-05	7.54132e-05
C8orf84	62.4016332371848	-1.26936	0.124318666222485	-10.2105289212516	1.77892447879415e-24	3.29738e-23
C8orf86	0.912879721312054	0.953788	0.207609459394741	4.59414454821682	4.34528109550335e-06	1.20196e-05
C8ORFK29	27.1261370708963	0.772643	0.105133491377954	7.34916124355303	1.99454463785666e-13	1.24881e-12
C9orf117	7.77273598531544	-1.31034	0.12861680336878	-10.1879735397784	2.2439278296141e-24	4.09756e-23
C9orf128	1.8639386887783	0.800233	0.0952046203338578	8.40540306547159	4.26394613942222e-17	3.87873e-16
C9orf135	0.879862788225483	-2.14372	0.38168015865196	-5.61652707184808	1.94833735985729e-08	7.10373e-08
C9orf140	1732.66922276772	0.910663	0.108016600679666	8.43076924537455	3.43400310866749e-17	3.15438e-16
C9orf167	116.954950720746	-0.602338	0.0673985639315893	-8.93696130671286	4.00018363766751e-19	4.41883e-18
C9orf170	9.57015051935216	-0.879537	0.104075416200315	-8.45095917946209	2.88919267450325e-17	2.6802e-16
C9orf171	33.0553396243939	-1.33949	0.182091090967617	-7.35612889121228	1.89320221402512e-13	1.18725e-12
C9orf173	1.5095866144762	0.844903	0.163859954983596	5.15625278682666	2.51940724491554e-07	8.09046e-07
C9orf24	66.4494126694132	-1.53981	0.188947377040315	-8.14940577363031	3.65716864485655e-16	3.04532e-15
C9orf3	224.949007252315	-0.591503	0.0582310389908252	-10.1578658623464	3.05694419740487e-24	5.52073e-23
C9orf4	59.2174071668758	1.04014	0.136361298784811	7.62780786593472	2.38779071592699e-14	1.64925e-13
C9orf44	10.0799513798572	-5.07839	0.41667607463524	-12.1878613322877	3.60765180870191e-34	1.97818e-32
C9orf47	16.2354959458134	-1.24024	0.112915115765253	-10.9837958827658	4.57295877729536e-28	1.24164e-26
C9orf64	149.94648834345	-1.04187	0.0998397460102826	-10.4354670131362	1.70771941257076e-25	3.5423e-24
C9orf66	3.16323465577142	-0.688348	0.109282086328615	-6.29881570550974	2.99928333794468e-10	1.33035e-09
C9orf89	144.861865313049	-0.7409	0.0816368043192899	-9.07556521453228	1.13089005859834e-19	1.31725e-18
CA10	973.513839012368	0.85001	0.128003965594318	6.64049566144975	3.12630037733826e-11	1.54821e-10
CA13	63.1941165554901	-0.682524	0.0758541603310712	-8.99784871591534	2.30183715593406e-19	2.59666e-18
CA2	1400.20731546459	-1.02042	0.0960844950478718	-10.6200329396697	2.40476250951345e-26	5.48525e-25
CA3	74.9857580502769	-3.41395	0.167177073807376	-20.4211514906891	1.08477019188378e-92	4.27074e-89
CA9	9.48275050376098	-1.0852	0.163873865401741	-6.62218781171044	3.53920972120804e-11	1.74522e-10
CABP4	7.50691454854702	-1.30248	0.118003530371433	-11.0376185327157	2.5161357046089e-28	7.04554e-27
CACNA1A	867.49071822463	0.813072	0.0817869893222383	9.9413346353568	2.75116096659896e-23	4.5548e-22
CACNA1B	311.263115020155	0.69159	0.154272402051814	4.48291390607513	7.36306409464693e-06	1.97334e-05
CACNA1D	207.866754234917	0.641018	0.0757835582514521	8.45853291453819	2.70762205407768e-17	2.51888e-16
CACNA1E	407.470811432736	0.710263	0.117979896612173	6.02020775232875	1.74193347333616e-09	7.12297e-09
CACNA1I	213.807640391866	0.769899	0.142864723654642	5.38900626689592	7.084833566974e-08	2.42337e-07
CACNA1S	5.75354518226155	-0.937869	0.20861724415476	-4.49564590810984	6.93590770514101e-06	1.8647e-05
CACNA2D1	208.027852686263	0.764109	0.131048418744237	5.83073556427054	5.51835757582192e-09	2.13332e-08
CACNA2D2	238.82600121519	0.735109	0.0887271682362226	8.28504482935238	1.18064604671241e-16	1.02745e-15
CACNA2D4	41.2926026224906	-0.600919	0.0987390131801803	-6.08593574594982	1.15812884675961e-09	4.82288e-09
CACNG2	124.801121534468	1.47972	0.159437303924614	9.28091802199966	1.68024541273339e-20	2.11752e-19
CACNG4	4043.18706922759	0.828134	0.0971309432843454	8.52595599140322	1.51552879952841e-17	1.43913e-16
CACNG8	17.7221400077526	0.805772	0.159499536038132	5.05187736469794	4.3748857105844e-07	1.36308e-06
CADM2	1523.93399997191	0.582111	0.071142175798415	8.18236471463803	2.78327142912469e-16	2.33641e-15
CALB1	168.847718764795	0.930965	0.164932508471779	5.64451850279477	1.65644167613321e-08	6.08568e-08
CALCR	2.85502494308618	-1.0057	0.174557757487197	-5.76140398984906	8.34171095183998e-09	3.156e-08
CALN1	1304.60198027158	0.651664	0.140151970568625	4.64969569607747	3.32425133374503e-06	9.33493e-06
CALU	2034.22822101055	-0.619752	0.0560700289398452	-11.0531700345569	2.1160815019493e-28	6.01083e-27
CAMK2N2	547.883577715294	0.599612	0.0838224009646745	7.15336501592966	8.46760468234209e-13	4.96677e-12
CAMK4	94.1537115418467	0.866502	0.149678058971355	5.78910654018946	7.07618059378451e-09	2.69951e-08
CAPG	928.713074772947	-1.4679	0.100383078926881	-14.6229898823252	2.00402669650131e-48	4.81089e-46
CAPN12	16.4723906696501	-0.708766	0.0865357780433932	-8.19043537281391	2.60282905013722e-16	2.19241e-15
CAPN13	7.16792714207715	-1.06213	0.212836212661732	-4.99037480161751	6.02622489678778e-07	1.84978e-06
CAPN14	6.13934829842707	0.586353	0.0963913003873963	6.08304644614173	1.1792016920074e-09	4.90441e-09
CAPN3	876.165915087463	-0.669651	0.116113291578506	-5.76721939938754	8.05901089913065e-09	3.05374e-08
CAPN5	1365.53426038039	-0.664036	0.0813438529420892	-8.16331975740684	3.25940171516854e-16	2.72216e-15
CAPN6	1.03938118020062	-1.89869	0.423832193689788	-4.47982255281903	7.47051189395494e-06	2.00023e-05
CAPS	449.315337508564	-1.426	0.108359288354406	-13.1599456676354	1.49193116058954e-39	1.44673e-37
CAPSL	5.99933944391258	-2.60827	0.30030420636926	-8.68542341343166	3.77334201747565e-18	3.7994e-17
CAPZA1	1184.05744593756	-0.597353	0.0375475712149673	-15.9092273282435	5.46842102377683e-57	3.0756e-54
CARD16	49.9735807142028	-1.88263	0.119194551753967	-15.7945953612262	3.3896125221611e-56	1.62743e-53
CARD6	113.001665400672	-0.609676	0.0722894392405816	-8.43382399321595	3.34549745821475e-17	3.07883e-16
CARD9	91.741671769406	-0.868043	0.0917116281189462	-9.46492133951269	2.93782093658247e-21	4.01326e-20
CASC1	40.4710864515057	-1.10147	0.105251469416416	-10.4651023107986	1.24941491504445e-25	2.63609e-24
CASKIN1	986.048717419278	0.733227	0.086189797675884	8.50712282103952	1.78302626557543e-17	1.68745e-16
CASP1	173.40552166066	-1.25767	0.0909384213174687	-13.8298967307238	1.68261897837967e-43	2.40017e-41
CASP4	112.648278197185	-1.31063	0.0889322861192466	-14.7373757273684	3.70920393073485e-49	9.73542e-47
CASP5	2.16235744582503	-1.9703	0.224200130973934	-8.7881144531915	1.5209098344677e-18	1.58744e-17
CASP6	77.8012519521954	-0.863388	0.0620368930346452	-13.9173348130198	4.97097296041295e-44	7.30251e-42
CASP8	96.0134284749556	-1.09373	0.0769288726467195	-14.2173826039393	7.1476673533555e-46	1.24515e-43
CAST	1291.46257112983	-0.639289	0.044526246800268	-14.357579914991	9.55042725165379e-47	1.95834e-44
CATSPER1	0.884716076440879	-1.75782	0.234557252885574	-7.49421379166435	6.66969344352381e-14	4.39548e-13
CAV1	814.694742103524	-1.26832	0.115938296017755	-10.939576324087	7.45474585734796e-28	1.97772e-26
CAV2	239.747955984651	-0.771305	0.0953430395661061	-8.08979279347909	5.97663177356294e-16	4.87365e-15
CBLN1	147.746901864287	0.722093	0.121701192419221	5.93332906429057	2.9685304044387e-09	1.1841e-08
CBLN2	180.642831813835	0.73356	0.158412139431853	4.63070767213375	3.64418070162279e-06	1.01999e-05
CBLN3	24.5884092869135	-0.756053	0.10923395913847	-6.92140950226403	4.47171769229307e-12	2.41763e-11
CBR1	1524.95921729651	-0.975995	0.107371529120684	-9.08988502258427	9.91438459425271e-20	1.16239e-18
CCDC102A	105.405760034622	-0.614134	0.0686578809017927	-8.94484405569036	3.72475292325715e-19	4.12848e-18
CCDC103	644.035464148692	-1.0138	0.0843353572967114	-12.0210289931258	2.75518836684397e-33	1.3559e-31
CCDC108	20.4733382934622	-1.27213	0.142623367416117	-8.91951502967298	4.68334517311585e-19	5.12176e-18
CCDC109B	109.207613867685	-1.66934	0.103013482742751	-16.2050508133028	4.64502985900592e-59	2.85742e-56
CCDC11	46.8225843365356	-0.86385	0.0962277460233707	-8.97714123916764	2.77893048755533e-19	3.12055e-18
CCDC114	13.557515562127	-0.782242	0.127413084759829	-6.13941410439776	8.28263949771166e-10	3.49804e-09
CCDC122	16.2953101057551	-0.986637	0.114476449705852	-8.61869258307275	6.77229033594726e-18	6.63246e-17
CCDC129	8.47696714363917	-2.90019	0.34677869312805	-8.36321812681189	6.10302282739594e-17	5.45091e-16
CCDC135	30.7824514711599	-1.96236	0.161003774686176	-12.1883163512888	3.58756763405295e-34	1.97266e-32
CCDC144A	55.2766277371651	0.739676	0.0978685154112757	7.55784940006453	4.0978810434613e-14	2.7673e-13
CCDC144B	60.738410715495	0.740303	0.127080995556514	5.82544545160764	5.69604624750247e-09	2.19727e-08
CCDC144C	35.5263695721254	0.713007	0.108105892088701	6.59545005015905	4.23967763977423e-11	2.07246e-10
CCDC146	216.905172917646	-0.887849	0.0923802119617852	-9.61081374608853	7.19778651619974e-22	1.04899e-20
CCDC150	18.9018969922269	-0.69022	0.113921102317702	-6.0587561639586	1.37178153137565e-09	5.66468e-09
CCDC152	91.4849895106562	-1.16438	0.0982385932225199	-11.8526159301265	2.08576365001819e-32	9.24736e-31
CCDC153	6.96987983061373	-1.70642	0.146272361189856	-11.6660549116942	1.90032933392264e-31	7.55717e-30
CCDC154	30.3207892827615	0.797816	0.121207270733308	6.58224546467199	4.63395694307029e-11	2.25556e-10
CCDC18	35.4915060887393	-1.00382	0.102198651331728	-9.82223352507908	9.03198423671102e-23	1.4373e-21
CCDC19	10.4139097939741	-3.6614	0.243453181843106	-15.0394384777896	4.04970570016272e-51	1.22644e-48
CCDC30	86.0361251575463	-0.587427	0.0736289761857747	-7.97819993641317	1.48482741258922e-15	1.16264e-14
CCDC33	3.51949476738249	-3.05087	0.33796854055321	-9.02708656852885	1.76302939036753e-19	2.01073e-18
CCDC37	5.01132706937463	-3.58663	0.315742028274328	-11.3593593432891	6.66314736456602e-30	2.21187e-28
CCDC40	196.459241052562	-0.937052	0.0948089046460633	-9.88358813683636	4.90446311250626e-23	7.95258e-22
CCDC42B	13.3907082093579	-2.1006	0.179254855610582	-11.7185300242114	1.02433969387613e-31	4.21844e-30
CCDC46	95.8844408660991	-0.983419	0.086514548969278	-11.3670885451064	6.09880746176406e-30	2.03829e-28
CCDC65	29.0107134633365	-1.6171	0.135503318060009	-11.9340305246973	7.86701072262852e-33	3.61827e-31
CCDC69	189.42337730295	-0.681025	0.0705266431838525	-9.65627436239823	4.62374191419895e-22	6.85379e-21
CCDC8	99.343460289896	-1.59175	0.138288544301655	-11.5103658773651	1.16981039126244e-30	4.28024e-29
CCDC81	23.328265116588	-1.20105	0.108955846524856	-11.0233012938499	2.95036080029052e-28	8.20309e-27
CCDC89	32.5338572912323	-1.07437	0.109382870956543	-9.82210745862074	9.0432887629768e-23	1.43794e-21
CCDC96	83.0307105022342	-0.617837	0.0714654943187743	-8.64525025093264	5.36875034861468e-18	5.30009e-17
CCL14	11.3660363878007	-1.04798	0.183326285876709	-5.71648591467197	1.08749479772905e-08	4.06984e-08
CCL17	1.38333676810373	-1.2751	0.252471705372801	-5.05048248624012	4.40695517299091e-07	1.37221e-06
CCL19	25.0765486064606	-0.863515	0.18841072100764	-4.5831497292998	4.58023823062487e-06	1.26401e-05
CCL2	498.264174063107	-1.27224	0.152703787449942	-8.33144328615681	7.98626931570586e-17	7.05293e-16
CCL20	1.93902475781856	-1.84231	0.221799636469846	-8.3061956899909	9.88192126514183e-17	8.6687e-16
CCL21	1.4046565612785	-1.32903	0.320807475748803	-4.14276429213715	3.43144570615847e-05	8.38377e-05
CCL22	8.19752846748414	-0.769531	0.134890332101543	-5.70486612472108	1.16434565305545e-08	4.34505e-08
CCL28	4.87341416137533	-0.821908	0.180234362964904	-4.56021759856843	5.11006412986993e-06	1.40128e-05
CCL5	64.6341993288272	-1.93266	0.132712825375576	-14.562727199407	4.84843035445993e-48	1.10978e-45
CCL8	14.0559697986067	-1.12137	0.220133750266978	-5.09403940731996	3.50513860001151e-07	1.10734e-06
CCNA2	125.063562521405	-0.854134	0.114332200123581	-7.47063554950585	7.98084117541298e-14	5.21244e-13
CCNB1	236.461129463584	-0.854617	0.0923608795488948	-9.25301454805554	2.18248715904322e-20	2.73123e-19
CCNB2	112.100982891236	-1.06192	0.157152251943293	-6.7572757932499	1.40610386779354e-11	7.21939e-11
CCR1	245.653428202904	-0.950477	0.10193050170165	-9.32475591841349	1.1123933118675e-20	1.42934e-19
CCR2	8.92078056443339	-2.19362	0.199334512407974	-11.0046929565204	3.62749521827439e-28	9.95917e-27
CCR4	0.89310211821495	-2.23279	0.35269867175359	-6.33059280497459	2.44221072736164e-10	1.09336e-09
CCR5	58.7179293347172	-1.69041	0.123204059670934	-13.7204383754129	7.66008558524338e-43	1.04714e-40
CCR7	6.56996940675466	-1.3504	0.157284470206604	-8.58574778363735	9.02474657227896e-18	8.72555e-17
CCRL2	45.3057487449521	-0.745058	0.0790520301612787	-9.42490844589425	4.30480956174685e-21	5.78037e-20
CD101	40.781769288246	-1.19556	0.112163031603252	-10.6590851809196	1.58145324776924e-26	3.67978e-25
CD109	218.733172791807	-1.34409	0.0962698789811425	-13.9616706911785	2.67098367593487e-44	3.98321e-42
CD14	1564.34028561098	-1.03579	0.108364321213262	-9.55840246674757	1.19588353659946e-21	1.69726e-20
CD163	894.03806312802	-1.71146	0.177457556531537	-9.64433824011556	5.19451456172493e-22	7.66522e-21
CD180	81.5793677465122	-1.03072	0.103681856902175	-9.94121302369141	2.7545221085686e-23	4.55654e-22
CD19	1.63324015444654	-0.974906	0.199701867773509	-4.8818085130685	1.05117305886634e-06	3.13806e-06
CD1E	1.34038328072065	-1.82582	0.300264744169852	-6.08071478671477	1.19647956966443e-09	4.97522e-09
CD2	17.8829627543785	-2.476	0.174885134570389	-14.1578671530595	1.66985712184092e-45	2.76228e-43
CD200R1	2.98607827180554	-1.08037	0.143847117119001	-7.51050895936872	5.88979240673254e-14	3.91162e-13
CD22	141.395918829911	-0.645159	0.155226091216464	-4.15625330453026	3.23509136502794e-05	7.94347e-05
CD226	12.7857267188175	-1.117	0.111151467091619	-10.0493853281817	9.2442213805712e-24	1.58928e-22
CD244	7.3978987294409	-0.716719	0.136973337155616	-5.23254623970373	1.67190810846778e-07	5.47886e-07
CD247	13.6749865709372	-1.21831	0.103981702189448	-11.7166017677424	1.04791756466732e-31	4.30653e-30
CD248	173.25879619596	-1.31749	0.128866181241428	-10.2237391995546	1.55234777833897e-24	2.90199e-23
CD27	12.747894950291	-0.614078	0.0876567957330435	-7.00548004973669	2.46140407995381e-12	1.36872e-11
CD274	17.6867812550666	-1.1517	0.126589206978972	-9.09796617742053	9.20391497784504e-20	1.08296e-18
CD28	5.82562150699751	-1.21408	0.170197775764221	-7.13336757296664	9.7942539401071e-13	5.69403e-12
CD300A	228.228509098791	-0.899147	0.08619442939132	-10.4316115364232	1.7784604986019e-25	3.68516e-24
CD300C	34.7703440696571	-1.00093	0.0981125341856739	-10.2018533978432	1.94524404850025e-24	3.58877e-23
CD300LB	4.95774969825015	-1.01197	0.159054170603112	-6.36243555194184	1.98579370898376e-10	8.97803e-10
CD300LF	31.855119270833	-1.25788	0.10888788055065	-11.5521005534041	7.20379311080744e-31	2.66554e-29
CD300LG	29.4265563804719	1.25175	0.172939391501755	7.2380883640964	4.55052939969076e-13	2.74777e-12
CD302	601.170347214981	-0.934242	0.0748649147519678	-12.4790359783165	9.71558066430469e-36	6.37504e-34
CD33	94.6868853256776	-0.804306	0.090845122794957	-8.85359078638297	8.47476893340203e-19	9.05186e-18
CD36	51.7383905948183	-0.663282	0.15175270782096	-4.37081078674072	1.23786027296008e-05	3.21935e-05
CD37	428.763763117268	-0.933906	0.0955032772308187	-9.77877971415644	1.38874760152148e-22	2.18002e-21
CD3D	6.34282821192706	-2.75554	0.244579101722938	-11.2664563053767	1.92148618651034e-29	6.04225e-28
CD3E	22.2488080641716	-2.31526	0.16450869568483	-14.0738073143121	5.50253976879987e-45	8.59663e-43
CD3G	1.63193374103105	-3.13025	0.286631021505148	-10.9208487871712	9.16354066000741e-28	2.40512e-26
CD4	1109.55129381599	-0.782447	0.0786367265709595	-9.95014953230103	2.51804568329241e-23	4.1794e-22
CD40	85.9178218612114	-0.883731	0.0749666724938401	-11.7883222723565	4.48384181086442e-32	1.92717e-30
CD40LG	1.42334243941913	-2.47929	0.294610707168539	-8.41547950240655	3.91291018265374e-17	3.57096e-16
CD44	5054.25358381618	-1.13794	0.109475312040362	-10.3944815206448	2.62711813925915e-25	5.33142e-24
CD48	38.7099751057753	-1.5556	0.153513208637919	-10.1333129802248	3.93100224407587e-24	7.00922e-23
CD5	9.96636625360595	-1.61583	0.145903326619198	-11.0746511874137	1.66527357991538e-28	4.81364e-27
CD52	29.2722402974258	-1.38411	0.132889473021304	-10.4155058458092	2.10674609485295e-25	4.32443e-24
CD53	780.619200888883	-0.972627	0.0872389171735722	-11.1490014327461	7.24144394232419e-29	2.16968e-27
CD58	91.6201336711757	-1.39686	0.0832505470979092	-16.7790476519004	3.47362102402072e-63	3.79879e-60
CD5L	12.4870665353236	-1.14313	0.23675078081487	-4.82841443174613	1.37624447096994e-06	4.05559e-06
CD6	19.1827194110078	-1.26401	0.131253710709795	-9.63027136469014	5.95719485925763e-22	8.75783e-21
CD63	7861.59276001324	-0.581186	0.0556581920614329	-10.4420583952638	1.59318090530076e-25	3.31885e-24
CD68	1902.94871277687	-0.92785	0.0897161226385657	-10.3420692742884	4.54613401549004e-25	8.967e-24
CD69	39.7446850938305	-1.44237	0.141367446313702	-10.2030098631724	1.92221355229806e-24	3.5496e-23
CD7	17.7619851883938	-1.42223	0.113040993765176	-12.5815440845239	2.66764142432545e-36	1.88217e-34
CD70	1.10189229136347	-1.68827	0.348470470664416	-4.84479900874986	1.26739914481187e-06	3.75e-06
CD72	28.6705136086115	-0.989353	0.0971173093700997	-10.1871926250242	2.26202109292097e-24	4.12677e-23
CD74	18353.0117872923	-1.5666	0.10722786743593	-14.6100274284109	2.42420357302451e-48	5.74945e-46
CD79A	5.70945117202281	-0.905862	0.131807663320474	-6.87260327274231	6.30407100674474e-12	3.35122e-11
CD79B	6.12309126834305	-1.2876	0.130592442853038	-9.85966593061506	6.22561789648834e-23	1.00042e-21
CD80	2.70161740133337	-1.6859	0.225015414785116	-7.49238260134501	6.7634418743595e-14	4.4513e-13
CD84	124.109938822186	-0.769547	0.118125243760493	-6.51467281061386	7.28482712723233e-11	3.46214e-10
CD86	260.484063585829	-0.955251	0.0942155386250586	-10.1389953563624	3.70894247511361e-24	6.6326e-23
CD8A	28.3302625806147	-1.14168	0.130148848151653	-8.77209168519075	1.75377506504767e-18	1.82276e-17
CD8B	7.8624875435497	-0.873275	0.111656002867712	-7.8211232244104	5.2354063884918e-15	3.84405e-14
CD93	541.779198760604	-0.825514	0.112990715985661	-7.30603553889074	2.75139430877983e-13	1.69731e-12
CD96	7.90017242435748	-2.34247	0.17485339807982	-13.3967387692531	6.31788824351533e-41	7.10672e-39
CD97	416.948134138492	-1.05216	0.0876267930943617	-12.0072477031291	3.25498561679262e-33	1.57819e-31
CD99	4943.45893739449	-0.632707	0.105059945109595	-6.0223430520054	1.71910041418867e-09	7.03398e-09
CDC20	141.277901059793	-1.16571	0.143730036945313	-8.11043410403843	5.04392359671102e-16	4.14052e-15
CDC25C	26.9049869185327	-1.00974	0.153075256453827	-6.59634028191303	4.21431046260833e-11	2.06109e-10
CDC42BPG	2.84174568774365	-1.2813	0.149923047863787	-8.54640837480034	1.26978150462057e-17	1.21338e-16
CDC42EP5	12.5665084899872	-0.956112	0.114040920871688	-8.38393634620396	5.11864807311492e-17	4.60936e-16
CDC45	65.3060785800409	-0.854235	0.168266212022215	-5.07668715871571	3.84072465323377e-07	1.20678e-06
CDC6	85.9300633978143	-0.965247	0.111022471674282	-8.69416049996753	3.49403489577158e-18	3.52357e-17
CDCA2	35.9504373746232	-1.17689	0.146262482865177	-8.04645577064064	8.52261678160645e-16	6.81983e-15
CDCA7	207.211933707318	-0.691713	0.0975247203412807	-7.09269234611198	1.31527641990172e-12	7.53309e-12
CDCA7L	442.252367109558	-0.703227	0.0992092741536011	-7.08831769848158	1.35752050279982e-12	7.76825e-12
CDCA8	93.2184760926395	-1.19037	0.125356182808846	-9.49587501231754	2.1836960535784e-21	3.02293e-20
CDCP1	68.1702124821836	-1.13876	0.100162234988544	-11.3691273557719	5.95802567341772e-30	2.00143e-28
CDH18	171.705861580309	0.767156	0.13901157636614	5.51864997015765	3.4161386525261e-08	1.20926e-07
CDH19	28.2109314465301	-1.24282	0.165621135837746	-7.50402039953762	6.18896665565219e-14	4.0965e-13
CDH22	324.956405365261	0.668102	0.123054124387336	5.42933736628811	5.6563670845511e-08	1.95515e-07
CDH9	39.9120071139252	0.789549	0.184559616102115	4.27801695182372	1.88565664086478e-05	4.78771e-05
CDHR1	1130.50055777201	1.05713	0.0954351426542229	11.0769339025257	1.62336908946933e-28	4.69941e-27
CDK1	204.494602309267	-0.766399	0.131358283179696	-5.83441503231849	5.39796065057603e-09	2.08965e-08
CDK15	0.735974767037318	-1.2385	0.296768227827843	-4.17330354279211	3.0021453780841e-05	7.40845e-05
CDK2	294.726092704971	-0.813424	0.0760476228730833	-10.6962468085562	1.05984531825586e-26	2.50457e-25
CDK5R1	2197.59722856598	0.591355	0.0828482911229726	7.13780593318091	9.48323877950343e-13	5.51974e-12
CDK5R2	538.760855077091	0.737815	0.133631587766101	5.52126513378278	3.36567472530296e-08	1.19268e-07
CDK6	1136.08266519308	-0.689817	0.104272173745671	-6.6155443096097	3.70187078624326e-11	1.82291e-10
CDKL1	46.6895211958373	0.650622	0.0750961817860298	8.66384350441433	4.56119422223813e-18	4.55079e-17
CDKN2A	217.366119628687	-0.730136	0.13171204206765	-5.54342603351199	2.96610000839428e-08	1.05813e-07
CDKN2C	608.012556267864	-1.028	0.10502322904192	-9.78835796399876	1.26330754475072e-22	1.99264e-21
CDKN3	47.6824839805154	-0.88977	0.109375070013936	-8.13503461945711	4.11820648124427e-16	3.41191e-15
CDR1	122.656695377603	0.812858	0.116225028078416	6.99382777382888	2.67485893228012e-12	1.47699e-11
CDSN	10.2024967841742	-1.50566	0.184695747629279	-8.15213060499924	3.57567819093462e-16	2.97872e-15
CEACAM1	5.70722041869632	-1.37423	0.118369072834339	-11.6096771563803	3.68002404486702e-31	1.40119e-29
CEACAM21	25.0806351880901	-0.843439	0.102507125644845	-8.22809984093784	1.90206518377258e-16	1.62368e-15
CEACAM4	2.93109620664031	-1.23892	0.176334274832582	-7.02598825024114	2.12556348123152e-12	1.18936e-11
CEBPA	574.767328095234	-0.928702	0.0884869891730922	-10.4953458010141	9.07448335001244e-26	1.94587e-24
CEBPB	382.88534760287	-0.593854	0.076393577419629	-7.77361306420943	7.62785063420537e-15	5.50016e-14
CEBPD	558.080517033852	-0.803444	0.101479056495729	-7.91733319630948	2.42658839346999e-15	1.84573e-14
CEBPE	1.93776826399989	-0.803338	0.142336234399696	-5.643943002191	1.66199115719918e-08	6.10493e-08
CECR1	637.063741332178	-1.0687	0.0798941609428981	-13.3764576744283	8.30102047593303e-41	9.23195e-39
CECR2	331.133778890019	0.816908	0.0663380010338998	12.314322299232	7.58496455461588e-35	4.51088e-33
CECR6	517.105558722226	0.60906	0.0602038141936423	10.1166302217167	4.66190366793452e-24	8.24524e-23
CELF3	1051.35467889164	0.880744	0.107867980383541	8.16502059913537	3.21380371033356e-16	2.68522e-15
CELF5	898.691648147262	0.72739	0.100043694723869	7.27072594040072	3.57560710705999e-13	2.18386e-12
CELF6	289.764778149492	0.583632	0.074297989626908	7.85528229475733	3.98872748097702e-15	2.96967e-14
CELSR1	101.195555296012	-1.69615	0.151651895258023	-11.1845189238392	4.85531390528826e-29	1.47041e-27
CELSR3	1300.67057260868	0.99868	0.0917370722860032	10.8863315335103	1.33926916963336e-27	3.45978e-26
CENPA	30.4049855505215	-1.03345	0.158598759369678	-6.51611839905822	7.21500333586064e-11	3.43227e-10
CENPE	85.8605337491076	-1.23847	0.136397702854132	-9.07981105681359	1.08763492890298e-19	1.27063e-18
CENPF	578.540004775573	-0.96751	0.136825527697752	-7.07112063892422	1.53687452837671e-12	8.74122e-12
CENPI	19.5601953598688	-0.656811	0.127334838328087	-5.15814353046409	2.49410401890416e-07	8.01705e-07
CENPK	44.709457399355	-0.984798	0.139320525713747	-7.06857572916307	1.56531921840555e-12	8.8953e-12
CENPM	64.0014957544455	-0.630151	0.108453919915596	-5.81031499463419	6.23554063069159e-09	2.39552e-08
CENPN	182.436945726509	-0.607924	0.0707915057469792	-8.58752314954957	8.88642210960689e-18	8.60026e-17
CENPW	36.6602343122172	-0.582735	0.0934979591135158	-6.23259793094328	4.58762563109959e-10	1.99354e-09
CEP135	129.076971447759	-0.720575	0.0742817841298362	-9.70055976195538	2.99849024802371e-22	4.53343e-21
CEP55	50.1824585211298	-1.1471	0.145147510136796	-7.9030249261281	2.72215124591264e-15	2.05703e-14
CER1	0.779421581807615	-2.6523	0.430117050907992	-6.16646442247942	6.98337837285553e-10	2.97807e-09
CES1	22.3083209284449	-1.64872	0.200431796931766	-8.22583160875055	1.93841185656039e-16	1.65256e-15
CFB	141.168205025795	-1.16607	0.111291387519553	-10.4775924662241	1.09495651467004e-25	2.33523e-24
CFD	53.5918870612902	-1.02942	0.111996252744745	-9.19158538213347	3.87093519880286e-20	4.74762e-19
CFH	307.225405798514	-0.89679	0.0968450387198017	-9.26005382664638	2.04329179361686e-20	2.56683e-19
CFI	377.161366025419	-1.57613	0.122354388466532	-12.8816765386889	5.70819533761307e-38	4.74117e-36
CFTR	4.21286989686568	-0.722551	0.172900921414511	-4.17898777525984	2.92809422809783e-05	7.23512e-05
CHAD	25.6447131652113	-1.63845	0.179198451462322	-9.14322047674943	6.0619637055181e-20	7.28064e-19
CHAF1B	81.9682239917907	-0.886174	0.109357001933586	-8.10349873787674	5.34007813929136e-16	4.37633e-15
CHEK2	64.7281680129762	-0.800042	0.0828556008689272	-9.65585577798567	4.64266548618487e-22	6.87149e-21
CHGB	2849.96430050708	1.13777	0.11910260726769	9.55288788188528	1.26130360433329e-21	1.78496e-20
CHI3L1	6870.73449983728	-3.69824	0.222829180911791	-16.59675406663	7.35629553184963e-62	6.29603e-59
CHI3L2	836.647707731167	-2.25757	0.164274057594253	-13.7427202949015	5.63192502420161e-43	7.75276e-41
CHMP4C	3.14661681136072	-0.832575	0.134697714240661	-6.18106450222655	6.36707928714418e-10	2.72469e-09
CHODL	32.0743314180656	-1.37868	0.132679134909842	-10.3910783922387	2.72257220322184e-25	5.5081e-24
CHRM4	46.8216771187917	1.0209	0.112478930837533	9.07636532444831	1.12261083966206e-19	1.30838e-18
CHRNA1	45.4962040752733	-2.96618	0.218908638468684	-13.5498590784079	7.93823904438497e-42	9.70585e-40
CHRNA4	492.737555367786	0.95983	0.105498383183274	9.09805033529362	9.19678739181059e-20	1.08277e-18
CHRNA7	20.6734288176005	0.765734	0.133597065751145	5.73166609628944	9.94488980536318e-09	3.73738e-08
CHRNA9	9.91587814547122	-2.33545	0.25967033398799	-8.99388777853382	2.38636116380686e-19	2.68892e-18
CHRNB2	676.175281069861	0.842043	0.101901233794749	8.26332162878022	1.41673838788793e-16	1.22157e-15
CHST13	4.34792523566152	-0.710619	0.137000540877587	-5.18697653172972	2.13735652944951e-07	6.91322e-07
CHST2	665.063584285252	-0.665203	0.0772940556472077	-8.60613219012807	7.55671156972282e-18	7.37501e-17
CHST6	408.643708805193	-1.25688	0.109540109795972	-11.474160217975	1.77896383993251e-30	6.344e-29
CIITA	173.941094644953	-1.6305	0.13267752950677	-12.2892250306453	1.03493413500218e-34	6.04531e-33
CISH	39.2357332699257	-1.43724	0.102388098496041	-14.0371397651095	9.23658786288925e-45	1.40947e-42
CITED1	201.092055083038	-0.684389	0.118441765667482	-5.77827191186154	7.54717678307843e-09	2.86973e-08
CITED4	65.6625718940083	-0.857143	0.104870843561792	-8.17332477585999	3.00004958352397e-16	2.51195e-15
CKAP2L	65.3318351715756	-0.949937	0.15280976535096	-6.21646711470104	5.08472885132271e-10	2.20275e-09
CKM	1.13038308997948	-1.64813	0.204070410182737	-8.07630500099311	6.67587806445016e-16	5.4214e-15
CKMT2	44.8758419508708	-0.930832	0.112641498076661	-8.26367255838709	1.41257758213215e-16	1.21905e-15
CLCA2	5.49302283095037	-0.676102	0.159153034363783	-4.24812736877828	2.15564833357121e-05	5.42911e-05
CLCA4	55.4786823999264	-0.817985	0.174187905055037	-4.69599322254561	2.65314337994921e-06	7.52986e-06
CLCF1	36.7112749645148	-2.37632	0.137761066783764	-17.2495991776238	1.12678333686231e-66	1.58434e-63
CLCNKA	1.69676103151785	-1.56483	0.257914650709291	-6.06722810627317	1.30136666518829e-09	5.3886e-09
CLCNKB	0.931045311092462	-1.57937	0.256290177706237	-6.16241367967466	7.16443878412247e-10	3.05e-09
CLDN1	26.9131402360026	-0.657828	0.0977803776718005	-6.72760262030717	1.72481187509286e-11	8.79382e-11
CLDN10	247.261269085268	-0.730476	0.150010619753084	-4.86949544370989	1.11883563211857e-06	3.33196e-06
CLDN11	1800.22678916812	-0.924406	0.132052329200708	-7.00029855903208	2.55417627703986e-12	1.41631e-11
CLDN23	11.5080824913114	-1.0347	0.0970094767558983	-10.6659435849169	1.4690030774243e-26	3.43029e-25
CLDN7	10.0772137003671	-0.717333	0.112643225964185	-6.36818508389365	1.91278018114122e-10	8.66584e-10
CLEC10A	9.78076970719027	-0.941999	0.221600591386136	-4.25088851313985	2.12924141934064e-05	5.36672e-05
CLEC12A	6.58180017776366	-2.1822	0.230943651446151	-9.44905163112674	3.41914409212947e-21	4.64178e-20
CLEC17A	15.9038731539835	-1.92381	0.184598852719689	-10.4215453207387	1.97714271975118e-25	4.0754e-24
CLEC18A	63.3664918530849	-1.1921	0.106604388855988	-11.1824236830314	4.97134431763955e-29	1.50324e-27
CLEC18B	67.7976920264251	-1.50401	0.128268146107581	-11.7254964499185	9.43462857315832e-32	3.91924e-30
CLEC18C	11.0350942634298	-1.57137	0.152367978445185	-10.3130222712869	6.15351590235334e-25	1.20171e-23
CLEC2B	63.2321830634328	-0.945846	0.0888024867074447	-10.6511233405267	1.72273484593084e-26	3.99435e-25
CLEC4F	35.9427793614757	0.967623	0.137448963747165	7.03987366732947	1.92414207237913e-12	1.08157e-11
CLEC5A	45.6691168653797	-2.11459	0.200077073982875	-10.5688706296095	4.1546762101663e-26	9.26215e-25
CLEC7A	120.617669300762	-1.0153	0.10705252022562	-9.48416830358634	2.44323600489106e-21	3.36143e-20
CLECL1	6.5477832545056	-1.28416	0.161200514490222	-7.96623716963524	1.63578859791229e-15	1.27476e-14
CLIC1	990.017032876819	-1.28762	0.0869342035228504	-14.8114179330813	1.2360511220053e-49	3.3331e-47
CLIC3	3.18267604061162	-0.95407	0.16785695463497	-5.68382508314449	1.31714994698324e-08	4.88656e-08
CLIC4	5995.38707975765	-0.611019	0.0577207652813859	-10.5857772815315	3.46889587110073e-26	7.8219e-25
CLIC6	13.3990012579557	-1.89785	0.204202385599823	-9.29397994718201	1.48624433508805e-20	1.88388e-19
CLSPN	48.1319491162905	-1.05791	0.148122060518858	-7.14213377316122	9.18930994557578e-13	5.36134e-12
CLU	154471.344455969	-0.727409	0.0830996845405133	-8.75344793354722	2.06931377084466e-18	2.13717e-17
CLVS1	146.902785218851	0.854942	0.141031403646638	6.06206752036996	1.34382773949595e-09	5.55741e-09
CLVS2	80.7013274080908	1.17877	0.158946847944172	7.41612699392098	1.20594871984456e-13	7.74775e-13
CMAH	41.4303478174781	-0.676155	0.0902102158664892	-7.495321160966	6.61362236136253e-14	4.36145e-13
CMPK2	175.14093167931	-0.749423	0.104852388099757	-7.14740732939713	8.84321793144107e-13	5.17322e-12
CMTM7	120.654150513997	-1.02482	0.0849588669011125	-12.0626003399337	1.66443405557983e-33	8.37964e-32
CMYA5	187.55856057469	-1.78529	0.152192942907294	-11.7304419770405	8.89927715284101e-32	3.71937e-30
CNDP1	884.872047702109	-0.856243	0.165852280200852	-5.16268473416414	2.43432938302413e-07	7.83131e-07
CNFN	5.39301718526822	-0.722565	0.112560215913715	-6.41936822371958	1.36841049918213e-10	6.30847e-10
CNGA3	301.679713338564	-1.29609	0.158028761154889	-8.20158555251869	2.37236963479907e-16	2.00516e-15
CNN3	7847.70483684075	-0.68527	0.0618042155431487	-11.0877562505868	1.43850651096658e-28	4.18272e-27
CNNM1	196.390613323163	0.688204	0.143748916104558	4.7875403361149	1.68837811086232e-06	4.91944e-06
CNPY1	14.1622684933581	-1.31322	0.149664372553982	-8.77445322066655	1.71736245150703e-18	1.78775e-17
CNPY4	412.448563807946	-0.609856	0.0494818954376081	-12.3248395414635	6.65758707466014e-35	3.97135e-33
CNTN2	3431.65393978657	-0.667634	0.144212164230399	-4.62952671456001	3.66502443599764e-06	1.02538e-05
CNTN3	284.749256354245	0.6999	0.138460235724787	5.05488407127507	4.30652279419406e-07	1.34285e-06
CNTN4	124.652027382498	0.600947	0.133438113937681	4.50356329914232	6.68234518611616e-06	1.80096e-05
CNTN6	56.1317873351484	0.995004	0.157355059002311	6.32330454794606	2.56027989390349e-10	1.14284e-09
CNTNAP2	1111.41420178037	0.587732	0.120095221873327	4.89388140237926	9.88664315502877e-07	2.96178e-06
CNTNAP5	92.7802979882639	1.18176	0.142720337919718	8.28027662952644	1.2288947346719e-16	1.06661e-15
COCH	37.9111526729365	-0.655925	0.129097444492744	-5.08085064313683	3.75748467361712e-07	1.18157e-06
COL12A1	201.071095241708	-1.38446	0.128711234460692	-10.7563611554879	5.53113117130032e-27	1.33432e-25
COL13A1	9.17208838116332	-0.95628	0.183633880287429	-5.20753813374908	1.91362519655271e-07	6.22126e-07
COL14A1	224.643698926512	-1.14872	0.149958724997962	-7.66026788806284	1.85545644640905e-14	1.29658e-13
COL15A1	67.4218959921733	-1.76312	0.153703917071015	-11.4709171018209	1.84691448755162e-30	6.55072e-29
COL17A1	14.0283822250439	0.861972	0.166074781462075	5.19026159418591	2.09998841716262e-07	6.79682e-07
COL1A1	943.63573980033	-2.1105	0.173252513680095	-12.1816578414825	3.89287366777722e-34	2.12275e-32
COL1A2	1208.16023308111	-1.32296	0.123615405747176	-10.7022646618865	9.93206567813156e-27	2.35842e-25
COL21A1	46.6355982674273	-1.85113	0.159172926767121	-11.6296665827668	2.91232866226775e-31	1.11971e-29
COL27A1	114.284392873332	-0.698945	0.130753788868983	-5.34550625059157	9.01646862531076e-08	3.04859e-07
COL3A1	854.566519121576	-1.96782	0.173775174534349	-11.323927655597	9.98938242599883e-30	3.22892e-28
COL4A1	1934.22930460383	-1.51491	0.146556314510533	-10.3367038204024	4.80790941592079e-25	9.45956e-24
COL4A2	2313.42152946614	-1.37328	0.133020718263678	-10.3238134150659	5.49945527889549e-25	1.07825e-23
COL4A6	84.3320082009025	-0.77654	0.142008150477561	-5.46827662192264	4.54432292364611e-08	1.58918e-07
COL5A1	241.918130167734	-1.63564	0.164683064596286	-9.93207676751121	3.01901132740742e-23	4.97316e-22
COL5A2	543.731102540804	-1.34824	0.124864775613345	-10.7975767351311	3.53407676754984e-27	8.65277e-26
COL6A2	765.283895750825	-1.67955	0.134795919694983	-12.4599715675955	1.23414610865086e-35	7.9915e-34
COL6A3	156.917946314018	-1.74613	0.164095661697484	-10.6409244784954	1.92212659913838e-26	4.42022e-25
COL8A1	62.3720737100898	-2.31157	0.197404696429437	-11.7097795667451	1.13574509288152e-31	4.63841e-30
COL8A2	215.831880183509	-1.3952	0.112048439918055	-12.4517450879408	1.36820462127976e-35	8.74452e-34
COL9A3	503.999673604963	-0.798444	0.144715827879276	-5.51732507909325	3.44198394886723e-08	1.21775e-07
COLEC11	14.0557195911326	-0.877862	0.14831324572405	-5.91897085047538	3.23962370851116e-09	1.28858e-08
COLEC12	464.13663864865	-1.25867	0.104035906737969	-12.0984154676382	1.0766935569194e-33	5.56292e-32
COPZ2	138.799670410713	-0.999588	0.0841648973312064	-11.8765393117875	1.56722343081297e-32	6.99564e-31
CORO1A	1263.00551897664	-0.65704	0.0688778687496534	-9.53920565772728	1.43930502217576e-21	2.01944e-20
CORO6	147.826327463715	0.982322	0.139211749242897	7.05631719056943	1.70973312200554e-12	9.65742e-12
COTL1	3343.55408260695	-0.594665	0.0621798424234469	-9.56362419514964	1.13703665651179e-21	1.61724e-20
COX6A2	1.73937141713639	-1.01625	0.242318676333167	-4.19385233239833	2.74256554736717e-05	6.80456e-05
CP	662.12693845235	-2.20829	0.158969938237276	-13.8912227134135	7.16024749411983e-44	1.03639e-41
CPA1	0.747101304633959	-2.60106	0.563814704626387	-4.61332259707861	3.96282510487671e-06	1.10312e-05
CPA2	2.80389564733042	-1.08446	0.183450906671769	-5.91142298889397	3.39164827894048e-09	1.34416e-08
CPA4	6.06838176487189	-1.82591	0.174777826708267	-10.4470614261103	1.51135640342372e-25	3.16164e-24
CPA6	0.822564665631438	-1.49912	0.29197324994919	-5.13444366870199	2.82979832446924e-07	9.02976e-07
CPAMD8	88.4879231100908	0.718663	0.158700052499087	4.52843855907701	5.9421153645391e-06	1.61405e-05
CPLX1	998.659623056405	0.746611	0.118419754895749	6.30478567746504	2.8859296040197e-10	1.28123e-09
CPLX2	4839.55897399889	0.685159	0.15701675218687	4.36360447917567	1.27936796064405e-05	3.32204e-05
CPM	659.674968249673	-0.902959	0.0959610009514582	-9.40964090531491	4.9783479312036e-21	6.64849e-20
CPNE5	1488.11983674691	0.808985	0.0959063362588498	8.43515554800268	3.307625958727e-17	3.04682e-16
CPPED1	258.166675049495	-0.856203	0.0783806661678251	-10.923650438359	8.88513741307999e-28	2.33743e-26
CPVL	485.350653317739	-0.966437	0.0944933705146319	-10.2275688127105	1.4921835457819e-24	2.79483e-23
CPXM2	91.9502187478184	-1.41783	0.150620569425192	-9.41324062672167	4.81071264696496e-21	6.42898e-20
CPZ	39.8054448579156	-1.10725	0.160713928948737	-6.88956225966607	5.59643276561818e-12	2.98876e-11
CR1	11.675413095556	-0.82899	0.154527251181989	-5.36468279205827	8.10916015145386e-08	2.7546e-07
CRB2	635.075522039997	-1.31954	0.119644743875027	-11.028775750854	2.77618377717533e-28	7.72973e-27
CRH	14.8131859416655	1.02312	0.217268867470509	4.70902172882654	2.48908538463536e-06	7.09597e-06
CRHR1	76.0859132392961	0.664812	0.123566034122908	5.38022014100441	7.43948081511655e-08	2.53806e-07
CRIP1	67.3106750888579	-0.846921	0.108893629638927	-7.77751046097642	7.39656553465691e-15	5.34513e-14
CRISPLD1	1153.97540867397	-0.967381	0.0836234935477127	-11.5682932515353	5.96575977697316e-31	2.21996e-29
CROT	494.928010298303	-0.593304	0.0619289955287829	-9.5803870412182	9.66819417463124e-22	1.38817e-20
CRTAC1	1448.19939797112	1.15886	0.108722490032787	10.658914490259	1.5843580929388e-26	3.68218e-25
CRTAM	2.53671862576572	-1.49688	0.18025030506613	-8.30443691097243	1.00293941596826e-16	8.79415e-16
CRY2	2155.25969334075	0.614545	0.0590201779660911	10.4124490761663	2.17551648059397e-25	4.45167e-24
CRYBB1	41.9489481317801	-0.590987	0.108167959455198	-5.46360127141856	4.66570892248865e-08	1.63047e-07
CRYZ	431.73366015095	-0.875292	0.0700376225087284	-12.4974478840932	7.70864561150075e-36	5.19674e-34
CSAG3	0.587821331572038	-1.6009	0.349774976952857	-4.57693864818281	4.71829761359821e-06	1.30102e-05
CSDA	786.172380496205	-0.850341	0.0765250092499011	-11.1119369321264	1.09752661017055e-28	3.22942e-27
CSDAP1	9.25572692574613	-0.69422	0.0962125386811453	-7.21548653172993	5.37414797125947e-13	3.22138e-12
CSDC2	1832.24904969494	0.714885	0.116299673965099	6.14692578138796	7.89990703358605e-10	3.34429e-09
CSF1R	3863.13449080727	-0.585942	0.0970910950705098	-6.03497621738608	1.5898610084709e-09	6.52416e-09
CSF2RA	336.922764224662	-0.662686	0.0954353027073915	-6.94381999770306	3.8163672506251e-12	2.07643e-11
CSF2RB	74.3248328302777	-1.09755	0.0995805328964041	-11.0217667757416	3.00109961507393e-28	8.30895e-27
CSF3R	349.873853562704	-0.746211	0.0900263075454591	-8.28881367623537	1.1438356231357e-16	9.96742e-16
CSMD1	514.150843280775	1.0277	0.0992769999120367	10.3518251286087	4.10582979996397e-25	8.17222e-24
CSMD3	800.666962776662	1.13279	0.11800419057549	9.59953548217679	8.03055190538676e-22	1.16151e-20
CSPG5	6715.87891584399	0.871459	0.0836713766178912	10.4152573294782	2.11225575379673e-25	4.33122e-24
CSRNP3	80.491554649666	0.867907	0.10698183221485	8.11265736074428	4.95245739703535e-16	4.07053e-15
CSRP1	6815.58863518646	-0.765733	0.100046957447087	-7.6537361948009	1.95222561859693e-14	1.36178e-13
CST3	20417.6549927059	-0.741567	0.0986275896554237	-7.51885983367661	5.52559844922149e-14	3.67968e-13
CST6	1.31959789684521	-1.98311	0.35638479403764	-5.56452646557971	2.62865234220619e-08	9.44425e-08
CST7	10.2815674262738	-1.65999	0.150361441257283	-11.0399681500105	2.45120034573907e-28	6.87349e-27
CSTA	15.4701197096724	-1.82797	0.173829420303525	-10.5158593997039	7.30120919169768e-26	1.58287e-24
CTAGE9	2.13548827855435	-0.760899	0.139722496256734	-5.44578598499105	5.1577121089797e-08	1.79444e-07
CTBS	213.027724878507	-0.851465	0.0641267640557779	-13.2778485075423	3.11207874787989e-40	3.25858e-38
CTF1	61.9159251629456	-1.07686	0.0957678723088572	-11.2444922032142	2.46511161583418e-29	7.6539e-28
CTHRC1	50.4628056591565	-1.71274	0.142904356832831	-11.9851842252576	4.24898695303076e-33	2.02521e-31
CTLA4	5.22605181568571	-1.4274	0.154168812339065	-9.25866651829483	2.0700116595914e-20	2.59874e-19
CTRB2	0.801490788705908	-1.50042	0.288485377158683	-5.20104080844372	1.98175578835227e-07	6.43107e-07
CTSC	731.989711263777	-1.18775	0.0897760556666761	-13.2301977585515	5.87326338335984e-40	6.02162e-38
CTSH	2032.16962503921	-0.59899	0.122383021702592	-4.89438706981716	9.86125828015463e-07	2.95552e-06
CTSL2	27.6935682652586	-0.947017	0.132541126957281	-7.14507831546052	8.99445943321408e-13	5.25701e-12
CTSS	743.717565341956	-1.08378	0.0896371281693624	-12.0906988544448	1.18276323715294e-33	6.0632e-32
CTSW	11.9910124419781	-1.91737	0.153459129792005	-12.4943166607868	8.01822738011865e-36	5.38699e-34
CTSZ	1406.43395977244	-0.989925	0.0746565878009641	-13.259707303308	3.96440040981657e-40	4.10733e-38
CTTNBP2	1468.27943996234	0.634565	0.0699628095228179	9.07002923852344	1.18985083266806e-19	1.3794e-18
CUBN	66.2617765410375	-0.598744	0.0913589662639152	-6.55375410726529	5.61083288758874e-11	2.70444e-10
CUX2	443.369067853129	1.0152	0.143920603570926	7.05387674141462	1.74000524843886e-12	9.81797e-12
CX3CR1	1681.22095504893	-0.760558	0.122593343379471	-6.20391268258665	5.50763519393271e-10	2.37342e-09
CXCL10	68.3033846894568	-2.68378	0.2047437260003	-13.1079760568938	2.96403195046311e-39	2.75647e-37
CXCL11	20.3610249286248	-2.40254	0.193468208766854	-12.4182894335551	2.07960452023654e-35	1.30789e-33
CXCL14	778.217466133551	-0.946316	0.168604903670714	-5.61262630749944	1.99278649752409e-08	7.25772e-08
CXCL6	2.70200592979645	-1.68154	0.256654633735519	-6.55174628104612	5.68681035502208e-11	2.73838e-10
CXCL9	43.2255533822198	-2.49809	0.193532734275817	-12.9078586825753	4.06447072385146e-38	3.43387e-36
CXCR3	3.76409302032485	-2.71642	0.231227922864745	-11.7477945134844	7.24860553492185e-32	3.05543e-30
CXCR4	586.519827812823	-0.718578	0.0916574629751187	-7.8398241138309	4.51177948438375e-15	3.33262e-14
CXCR6	7.30964882725467	-2.31879	0.19922245647113	-11.6392087438665	2.60420341726745e-31	1.0032e-29
CXorf1	119.682371110604	0.591547	0.0757289518499208	7.8113655195775	5.65716899175662e-15	4.14137e-14
CXorf21	40.6783426352542	-0.646419	0.113414504597527	-5.69961070994471	1.20081321334845e-08	4.47351e-08
CXorf22	2.49020493689119	-1.0111	0.222790571166937	-4.53833411932019	5.67003721978827e-06	1.54505e-05
CXorf30	3.87631077615984	-1.75039	0.265988100068774	-6.58072367098254	4.68163965473162e-11	2.27438e-10
CXorf58	0.821931491530734	-0.883773	0.197736882857502	-4.46943827055755	7.84252881988034e-06	2.09443e-05
CXorf64	12.5205221694029	-1.08886	0.191617952928746	-5.68245862075454	1.32772043929091e-08	4.92485e-08
CXXC4	69.3731550421269	0.796261	0.0865149561922497	9.20373858188035	3.45707656869789e-20	4.26662e-19
CYB5R1	818.653744273307	-0.585509	0.0599367628647983	-9.76877591626089	1.53292914738793e-22	2.38921e-21
CYB5R2	107.294811727387	-1.10147	0.151415277243249	-7.27452480909749	3.47641985992542e-13	2.12658e-12
CYBA	753.486603282353	-0.887492	0.0849086917812962	-10.4523134743505	1.42993855150577e-25	2.99769e-24
CYBB	1151.13517505031	-0.930003	0.103320365800656	-9.001157175856	2.23350926338143e-19	2.52537e-18
CYBRD1	1667.00228831034	-0.770789	0.0768664622978562	-10.0276362465517	1.15242393564603e-23	1.96581e-22
CYP11A1	20.1350159044278	-1.12192	0.165283089727494	-6.7878437911906	1.1382178991795e-11	5.91027e-11
CYP17A1	1.86499557259576	0.625702	0.147159236707107	4.25187118371677	2.11991791876543e-05	5.34528e-05
CYP19A1	18.6831828696445	-0.867697	0.133456220872542	-6.50173727441122	7.93976790848226e-11	3.75708e-10
CYP1A1	7.6118558452578	0.710538	0.134929381022803	5.26599780830498	1.39429947232919e-07	4.60748e-07
CYP1B1	218.312395142763	-0.702402	0.11959049961141	-5.873389095456	4.26974714359289e-09	1.67364e-08
CYP27A1	817.137478928331	-0.931256	0.0969868203168042	-9.60187729198048	7.85013974524006e-22	1.13761e-20
CYP27B1	13.3115586204689	-0.914625	0.121843633179547	-7.50654616244038	6.07077361219516e-14	4.02368e-13
CYP2A6	4.31000762008125	1.24372	0.1416328889151	8.78131110773111	1.61579926935982e-18	1.68291e-17
CYP2D6	20.2315966492222	0.626416	0.108653283839715	5.76527233898827	8.15260848714784e-09	3.08623e-08
CYP2E1	99.0454306866599	0.583912	0.0987845604741945	5.91096587863287	3.4010748679783e-09	1.34763e-08
CYP2S1	26.9942065628302	-0.932264	0.0863612104157096	-10.7949416740475	3.63693375457619e-27	8.89355e-26
CYP39A1	21.7559550465728	-0.993823	0.102246329919052	-9.71988624602526	2.48058459451919e-22	3.78823e-21
CYP4F11	108.648182696247	-0.834706	0.109387813202242	-7.63070493500296	2.33473498424624e-14	1.61374e-13
CYP4F3	22.5415058488914	-1.38649	0.187490154461466	-7.39498874645632	1.41420250256241e-13	9.01241e-13
CYP8B1	2.02166192622121	-0.593409	0.125643684144725	-4.72295129366995	2.32446533610318e-06	6.64784e-06
CYR61	1136.27665480599	-0.853193	0.139031609379795	-6.13668409418418	8.42617077107336e-10	3.55332e-09
CYSLTR1	17.7819792041623	-0.621229	0.101944326459619	-6.09380773810394	1.10256071295157e-09	4.60316e-09
CYTH4	341.140297541926	-0.830955	0.0894014408210692	-9.29465168818209	1.47688965816517e-20	1.87444e-19
CYTIP	54.5147608140457	-1.1892	0.100249647190208	-11.8624106672433	1.85554627029388e-32	8.24524e-31
CYTL1	97.0657688719992	-1.11538	0.105423107049275	-10.5799960470778	3.68973793321215e-26	8.28193e-25
DAB1	46.3333497287411	0.755169	0.136339079131512	5.53890475708644	3.04369105733863e-08	1.08502e-07
DACH2	185.206078107904	0.945369	0.152698414468558	6.19108848233712	5.97501546116404e-10	2.56137e-09
DACT2	38.7406004980771	-0.731206	0.116507946891342	-6.27601564308591	3.47359250400383e-10	1.52765e-09
DAO	77.0486499864445	-1.75914	0.306369774009679	-5.74187044396388	9.36364518053617e-09	3.52907e-08
DAPP1	29.4124959762647	-1.34147	0.111545717366629	-12.0261991762084	2.58803079934587e-33	1.28003e-31
DARC	126.756343920699	-0.722175	0.109396752299269	-6.60142974316729	4.072112404028e-11	1.99551e-10
DCC	124.659806599342	0.913696	0.12844863704315	7.11331770545548	1.13286087332084e-12	6.53395e-12
DCDC1	1.65758855333145	-1.25966	0.223341923904476	-5.64005402045783	1.69996822801619e-08	6.2386e-08
DCDC2	27.5047236807973	-1.377	0.128832880859319	-10.6882364133195	1.1554717054442e-26	2.7175e-25
DCTD	712.271635694412	-0.829605	0.074962893282154	-11.0668701944243	1.81633865673699e-28	5.22728e-27
DCX	1843.50493197029	0.830681	0.11008736476508	7.54565185678097	4.50030777213629e-14	3.02453e-13
DDB2	177.57283118885	-0.876069	0.0708566227669903	-12.3639747421436	4.094015580167e-35	2.51061e-33
DDIT4L	99.384962291806	-2.65856	0.186017993012696	-14.2919362143066	2.45682498140374e-46	4.65025e-44
DDR2	270.771879504664	-0.612447	0.134375416509666	-4.55773079383018	5.17092558728431e-06	1.4165e-05
DDX43	2.85308653663803	-0.876286	0.191415869373893	-4.57791732553696	4.69628219052228e-06	1.29513e-05
DDX60L	241.109281118353	-0.639391	0.080400068798097	-7.95261703460025	1.82612180604319e-15	1.41469e-14
DEF6	197.573939066329	-0.89061	0.0862858472180081	-10.3216252579005	5.62626015468728e-25	1.10202e-23
DENND1C	87.7320607636895	-0.899774	0.0851414466651477	-10.5679912501555	4.19381130302617e-26	9.33882e-25
DENND2D	50.3705643423926	-1.5622	0.107784651540881	-14.4937452960865	1.32705139317138e-47	2.93517e-45
DENND3	702.620522526445	-0.637631	0.0721621085891492	-8.83608796103511	9.91287395407407e-19	1.05024e-17
DEPDC1	38.6378286632758	-1.4536	0.156378865530811	-9.29537368025077	1.46690009527667e-20	1.86296e-19
DEPDC1B	45.1789817694544	-0.896783	0.129365451296599	-6.93216895699679	4.14436546871103e-12	2.24743e-11
DERL3	29.3200653613925	-1.12492	0.106265955467407	-10.5859083613085	3.46404364364919e-26	7.81992e-25
DES	42.4240030077886	-1.347	0.245016388407292	-5.49760925621427	3.84974796556476e-08	1.35592e-07
DGCR10	19.9253943131248	0.871811	0.110185039453204	7.91224625891507	2.52785728268275e-15	1.91609e-14
DGCR9	169.612227644046	0.8446	0.0954400890106157	8.84952876537798	8.7889608482935e-19	9.37219e-18
DGKG	1046.80210291815	0.667819	0.109487099342992	6.09952335667289	1.06385214979565e-09	4.4491e-09
DGKH	22.1381680471196	0.625514	0.0949451953374333	6.58815502203322	4.45325551060688e-11	2.17147e-10
DGKK	42.3874005278869	1.73111	0.237573023759198	7.28662781124558	3.1780928947921e-13	1.94772e-12
DHH	4.66427597658236	-1.56079	0.161492754142946	-9.66476207395961	4.25607731428775e-22	6.35185e-21
DHRS2	86.6359207479645	0.830708	0.176883506493033	4.69635430422321	2.64845988685478e-06	7.51874e-06
DIAPH3	55.3979575858203	-0.815306	0.0884598579012628	-9.21667394677376	3.06458691523006e-20	3.79889e-19
DIO1	1.14448778789009	-1.02107	0.16118192982535	-6.33487689295259	2.37530852841835e-10	1.06607e-09
DIRAS3	160.174984975452	-1.61071	0.126942161853592	-12.688569601937	6.84240096211679e-37	5.12139e-35
DKFZP434H168	3.52186751284615	0.585493	0.10311354030677	5.67813640407165	1.36170112192467e-08	5.04424e-08
DKFZp686O24166	139.971261812618	1.23454	0.108763384860797	11.3506702800226	7.35963380254442e-30	2.41056e-28
DKK1	31.9833825555866	-1.6426	0.17816209963598	-9.21967021154208	2.98015376376316e-20	3.69655e-19
DKKL1	2.34691575794862	-1.77513	0.220812502767031	-8.03908785718825	9.05096708179818e-16	7.22206e-15
DLEC1	113.176177262589	-1.13495	0.134502849501268	-8.43813093372618	3.22452300768776e-17	2.97306e-16
DLGAP1	843.402898187587	0.790521	0.0945750696700976	8.35865843228527	6.34354832265486e-17	5.65291e-16
DLGAP2	146.187380351649	0.67056	0.158984583642254	4.21776699482324	2.46733583797523e-05	6.1613e-05
DLGAP3	370.810687026396	0.717935	0.113664983987893	6.31623740617174	2.68008234332734e-10	1.19469e-09
DLGAP5	57.8257439383394	-1.2931	0.184613974211646	-7.00437120170752	2.4809753441856e-12	1.37883e-11
DLL1	1789.51370895845	0.5904	0.0848375367165151	6.95917792814038	3.42264021657593e-12	1.87152e-11
DLL3	5045.62690549699	0.700893	0.122800701932265	5.70756555448829	1.14603487368336e-08	4.27997e-08
DLX5	36.9009403426078	-0.673082	0.161730058450924	-4.16176212898553	3.15801217166952e-05	7.76777e-05
DMC1	2.26515733139053	-1.08616	0.171186117359239	-6.34491975570998	2.22541411869692e-10	1.00154e-09
DMKN	28.4231725417357	-0.937542	0.162615931749076	-5.76537829871471	8.1474877915589e-09	3.08489e-08
DMRT2	32.5756198674356	-1.0702	0.161558439296795	-6.6242005085424	3.49132593308463e-11	1.72247e-10
DMRTA2	59.4940072541349	-3.37971	0.207635631890284	-16.2771070314275	1.43494055497706e-59	1.00881e-56
DNAH11	14.4610166544447	-3.32179	0.190957258972453	-17.3954495175586	8.93232352974881e-68	1.35256e-64
DNAH12	10.0676962901507	-0.774673	0.131478152064187	-5.89202781956309	3.81484931483518e-09	1.50311e-08
DNAH2	17.5920830996515	-0.640082	0.138796087528665	-4.6116753184446	3.99436561620949e-06	1.11137e-05
DNAH3	0.810099377975795	-2.2989	0.47699823000636	-4.81951090397903	1.43910587900086e-06	4.22944e-06
DNAH5	67.4594468412275	-1.20188	0.127955443123144	-9.39292719455126	5.83554768805357e-21	7.72513e-20
DNAH6	46.1531478487276	-1.08929	0.133758787427313	-8.14366635863859	3.83485006987909e-16	3.18385e-15
DNAH9	222.351157089902	-1.26662	0.120615414822634	-10.5013351245748	8.51669112240242e-26	1.83627e-24
DNAI1	16.1220001924231	-1.15767	0.151850967998451	-7.62374831449547	2.46413597518507e-14	1.69722e-13
DNAI2	4.67271478100451	-0.798616	0.178310862616064	-4.47878758896	7.50681849618802e-06	2.00906e-05
DNAJB13	5.34748128539156	-1.02031	0.169453641225557	-6.02119107364954	1.73138220726892e-09	7.08276e-09
DNAJC22	26.0480194973079	-1.17262	0.115862306948698	-10.1207811067801	4.46835227269445e-24	7.91715e-23
DNAJC5B	3.03329731049752	-0.980197	0.180593282907295	-5.42765100735616	5.71005510657025e-08	1.97163e-07
DNALI1	713.540604396007	-1.07241	0.0815078741468274	-13.1571175718509	1.54882636553329e-39	1.49454e-37
DNASE1L3	6.06064649558473	1.30941	0.236843039514699	5.52860960906764	3.22778729377344e-08	1.1465e-07
DNASE2B	6.90589222920965	-0.69094	0.155994783339034	-4.42925228627293	9.45603550430711e-06	2.49922e-05
DOCK2	428.976738647153	-0.834841	0.0961153535198231	-8.68581840188679	3.76025217183952e-18	3.78816e-17
DOCK8	529.042863118233	-0.747179	0.0945276587546028	-7.90434466741646	2.69346813316821e-15	2.03613e-14
DOK2	19.4564135509456	-0.968683	0.139799388524648	-6.92909220132944	4.23549700253567e-12	2.29369e-11
DOK3	144.052080238332	-0.953613	0.0808967470262531	-11.7880230153957	4.4998000031947e-32	1.92982e-30
DOK4	392.964216482013	0.593331	0.0717096539968463	8.27406770504769	1.29464585571015e-16	1.12121e-15
DOK6	514.027581102009	0.763201	0.109289350914906	6.98330527122512	2.88314980092329e-12	1.58577e-11
DOK7	11.0694265013209	-0.750012	0.120831063800736	-6.20711363756939	5.39665763625251e-10	2.32661e-09
DPEP1	36.3249804057728	-1.40532	0.256278610386199	-5.48356847526179	4.16830826193083e-08	1.46314e-07
DPEP2	48.9244894692368	-0.713191	0.0829930550466109	-8.59338518742213	8.44438650092039e-18	8.20068e-17
DPP4	25.9503603679232	-1.83001	0.144855926834036	-12.6333442139543	1.38274261103559e-36	1.00812e-34
DPPA4	0.740558861004158	-1.41932	0.278485554258693	-5.0965698163231	3.45863045934691e-07	1.09371e-06
DPRXP4	0.576303716408981	-1.07552	0.202141976742416	-5.32061065127643	1.03419523779704e-07	3.47224e-07
DPY19L1	1366.41461670548	-0.851186	0.0644352020764837	-13.209960101024	7.68651613376073e-40	7.71985e-38
DPYD	203.721808579834	-1.62366	0.0958736273979953	-16.9354215371067	2.46585631458709e-64	3.23603e-61
DRP2	552.336592844408	0.681978	0.0690597979212143	9.87517986551727	5.33371852977865e-23	8.62022e-22
DSC2	71.6661065040375	-0.929613	0.0885659995596409	-10.496270695317	8.98604075038867e-26	1.92901e-24
DSCAM	1337.71597180446	0.798385	0.0836681124983042	9.54229113948163	1.39711013259877e-21	1.96584e-20
DSCAML1	1355.94772438518	0.838285	0.0884998944405514	9.47215789462675	2.74121270573546e-21	3.76033e-20
DSCR6	0.785374652033723	-1.8582	0.329689110375732	-5.6362148094209	1.73828529253826e-08	6.37209e-08
DSG2	28.0533441360014	-3.69811	0.251947326619751	-14.6781092336075	8.90387701163556e-49	2.24709e-46
DTHD1	10.5326709468902	-1.18099	0.188260147913652	-6.27320423596439	3.53692460848912e-10	1.55446e-09
DTL	140.345098112754	-0.74508	0.134367893056059	-5.54507764181372	2.93823760885403e-08	1.04889e-07
DTX3L	716.678140602272	-0.619933	0.0698608914444446	-8.87381629160408	7.06811180530665e-19	7.60721e-18
DUSP10	151.825455839967	-0.96704	0.0805717165770339	-12.0022210318155	3.45887992537147e-33	1.67293e-31
DUSP23	134.22732923265	-0.721136	0.0730476411505373	-9.872128893643	5.4985029363665e-23	8.87925e-22
DUSP26	1074.35062794029	0.586269	0.077577869463208	7.55716449519039	4.11950863951088e-14	2.78095e-13
DUSP9	104.774770512013	0.930723	0.126233847230176	7.37300386579661	1.66825647977086e-13	1.0512e-12
DYNLRB2	21.6385527557732	-1.40887	0.129624754869602	-10.868800156844	1.62321429450631e-27	4.14435e-26
DYRK3	83.437298507641	-0.674631	0.0677471791326415	-9.95807152831325	2.32529313642304e-23	3.8791e-22
E2F2	84.6808220822629	-0.792488	0.146981907113423	-5.39173877159302	6.97791592555844e-08	2.38721e-07
E2F7	46.4147222662545	-1.5772	0.153224241333415	-10.2933868342912	7.54739878709738e-25	1.45657e-23
E2F8	19.0864125770866	-1.04308	0.148051065004914	-7.04540880356846	1.84917790758441e-12	1.04092e-11
EBF2	1.20600240021979	-1.42616	0.252364453073301	-5.65118820634984	1.5934250676298e-08	5.86182e-08
EBF3	7.40463688029342	-1.19828	0.166877786541002	-7.18058086301953	6.94158580066845e-13	4.10963e-12
EBI3	110.838244920939	-0.693216	0.0889365766869135	-7.79449357278785	6.46673051368057e-15	4.70427e-14
ECE1	1943.18247286146	-0.669914	0.0604512546837104	-11.0818931590405	1.53590137427245e-28	4.45932e-27
ECHDC2	186.583589625839	-0.964605	0.103562727316575	-9.31420810609967	1.22865626298102e-20	1.57155e-19
ECHDC3	36.4655316168696	-0.871531	0.116613732919377	-7.47365343044653	7.79983990906101e-14	5.0993e-13
ECM2	450.275592944023	-1.68635	0.117451999678599	-14.3577477627873	9.52732904180804e-47	1.95834e-44
ECSCR	41.1306785169923	-0.64381	0.115779239806885	-5.56067174800756	2.68738237684509e-08	9.63942e-08
ECT2	247.251054195168	-0.598644	0.0838237889041457	-7.14169005005145	9.21902957801205e-13	5.37708e-12
EEF1DP3	2.0528552086623	0.853324	0.13081944761095	6.52291482163998	6.89540260017230e-11	3.28579e-10
EFCAB10	11.1631185020905	-1.42067	0.134546017643593	-10.5589858662472	4.61621946938027e-26	1.02101e-24
EFEMP1	3209.65360871347	-1.08932	0.108053444901532	-10.081295764733	6.68387963481397e-24	1.16436e-22
EFEMP2	563.321458232632	-1.18854	0.105018347020153	-11.3174580005787	1.07545255647541e-29	3.4592e-28
EFHC2	46.9198000721028	-1.62574	0.154411954170309	-10.5285770048313	6.37914978307401e-26	1.39371e-24
EFNA4	42.7335835826962	-0.73516	0.0820737984569925	-8.95730278696428	3.3271709778617e-19	3.70659e-18
EGF	51.4134752307213	-0.729716	0.11230996041954	-6.49733574133195	8.17548762612768e-11	3.86305e-10
EGFLAM	58.1792568326498	-0.70899	0.111895354158874	-6.33618584379399	2.35522681856025e-10	1.0573e-09
EGFR	4951.80799206802	-0.970743	0.141372731860319	-6.86654827627729	6.57739242450631e-12	3.48992e-11
EHD2	881.573859738614	-0.775537	0.0748419218065223	-10.3623399049679	3.67851205031373e-25	7.36638e-24
EHF	9.17744938799222	-0.720608	0.141500184626019	-5.09263236529595	3.53126015345335e-07	1.11506e-06
EID3	19.2812318769047	-1.09352	0.126126822789787	-8.67002935827737	4.32008983456149e-18	4.31899e-17
ELAVL4	348.486686505426	0.611732	0.114051816735707	5.36363330749469	8.15644046601635e-08	2.7697e-07
ELF4	98.2477122382797	-1.0287	0.0902233342400571	-11.4016678711662	4.10184490696869e-30	1.40182e-28
ELF5	0.850598017145728	-2.03775	0.347279680139158	-5.86775557371316	4.41733796801493e-09	1.72908e-08
ELFN2	2169.16486033119	1.00596	0.0994974804810308	10.1103622710886	4.97001554511791e-24	8.75871e-23
ELK3	197.856705165588	-0.616271	0.0823974471149987	-7.47924331885683	7.47517597543666e-14	4.89517e-13
ELN	1571.99935220814	-0.625184	0.0924193361417533	-6.76464560283299	1.33635906257277e-11	6.87385e-11
ELOVL1	1302.35017700163	-0.749218	0.0795075333263596	-9.42323441296212	4.37402198303618e-21	5.8653e-20
EMB	141.740142670379	-0.92748	0.0949484044893702	-9.76825243752562	1.54086894900327e-22	2.39968e-21
EME1	60.4113637378184	-0.604181	0.0989703475391355	-6.10467082223664	1.03012765189093e-09	4.31724e-09
EMILIN1	633.689385551329	-0.911499	0.0886725849314684	-10.2793813861817	8.72860310120465e-25	1.67305e-23
EMILIN2	147.902968294311	-1.5545	0.131981299549402	-11.7781917251875	5.05662288913533e-32	2.15921e-30
EMILIN3	409.979292210886	-2.2455	0.202121784724182	-11.1096234132011	1.12633510336402e-28	3.30924e-27
EMP1	2324.3697076123	-0.923828	0.119656288296176	-7.72068117703671	1.15709650242969e-14	8.24075e-14
EMP3	317.305962082706	-2.38364	0.155096104347947	-15.3687852517708	2.65092912496343e-53	1.00353e-50
EMR1	23.4812149483084	-2.54449	0.205007283817319	-12.4117003157119	2.2580591712885e-35	1.41111e-33
EMR2	88.0765866970254	-1.34472	0.107645736113924	-12.4920651346598	8.24844006831192e-36	5.50409e-34
EMR3	0.603423643431825	-1.53863	0.360414870452946	-4.26904811163164	1.96308926489415e-05	4.97149e-05
EMR4P	18.6642005576532	-0.679905	0.138939238560817	-4.8935445275346	9.9035894176756e-07	2.96595e-06
EN1	32.6306445961447	-2.08031	0.310378159367958	-6.70250404617089	2.04877900803633e-11	1.03358e-10
EN2	39.4548591653631	-1.05908	0.142549166405803	-7.4295898505163	1.08934929669122e-13	7.03307e-13
ENG	1274.22230369807	-0.628486	0.0683880361495684	-9.18999307268794	3.92866661255954e-20	4.81344e-19
ENPEP	91.8794367741952	-0.659038	0.125683828833451	-5.24361919573293	1.57457007322414e-07	5.17021e-07
ENPP1	50.8211839559798	-1.48546	0.109611485852021	-13.5520622644479	7.70350422634274e-42	9.59769e-40
ENPP2	1723.28933219247	-0.7284	0.130964024903885	-5.5618355921228	2.66951729080306e-08	9.58232e-08
ENPP6	236.795839489555	-0.622697	0.121056147148672	-5.14387087024223	2.69134559498604e-07	8.61589e-07
ENTPD2	253.752127288741	-0.718839	0.125801721088373	-5.7140618607439	1.10310868383921e-08	4.12592e-08
EOMES	2.44712010533928	-2.45004	0.230779572778687	-10.6163797339816	2.50072288504438e-26	5.69095e-25
EPHA1	1.73535192370562	-1.9298	0.213202661332953	-9.0514749311838	1.41050049286247e-19	1.62183e-18
EPHA10	167.192865791634	0.775744	0.117781829054734	6.58628329041387	4.50972987198943e-11	2.19792e-10
EPHA2	157.427799930038	-0.640335	0.107855074820784	-5.93699746089721	2.90289161174846e-09	1.15886e-08
EPHB1	1883.40768831952	0.673568	0.0843506530293147	7.98533411365956	1.401422056028e-15	1.1004e-14
EPHX2	241.294374719331	-0.803963	0.10159052179602	-7.91376061437932	2.49728269647152e-15	1.8951e-14
EPHX3	5.81591807820215	-1.5936	0.134322003637566	-11.8640143710808	1.82033533090569e-32	8.10708e-31
EPR1	136.659880829369	-1.22985	0.15309733845139	-8.03315482463454	9.49976636472942e-16	7.55873e-15
EPS8L1	8.04247875733267	-0.65874	0.100124315168588	-6.57921942467464	4.72924418134217e-11	2.29638e-10
EPSTI1	80.3006976953605	-1.21738	0.114097111940781	-10.6696688913232	1.41128384533081e-26	3.30728e-25
EPX	4.27171208459614	0.672279	0.0810940003886415	8.29011486051283	1.13139159529475e-16	9.86335e-16
ERAP2	431.108789859054	-0.580718	0.124947007867554	-4.64771577496084	3.35630934354409e-06	9.41958e-06
ERCC6L	19.6438670455189	-0.948635	0.119858297072968	-7.91463907470565	2.47971392634413e-15	1.8825e-14
ERMN	2749.31512707911	-0.790114	0.156804223092961	-5.03885433453094	4.68326737121387e-07	1.45288e-06
ERP27	8.65952076156851	-1.81255	0.147842395718869	-12.2600121148567	1.48477692086896e-34	8.49646e-33
ESCO2	51.4330542084123	-0.990796	0.144375689087497	-6.8626244722147	6.76067845005367e-12	3.58041e-11
ESM1	38.168513572156	-2.56623	0.225982321826351	-11.3558851812334	6.9334081581973e-30	2.29e-28
ESPL1	91.5541526801988	-0.967841	0.152714871781685	-6.33756643172134	2.33422576644729e-10	1.04835e-09
ESPNL	8.2856901389514	-1.68093	0.190346883598283	-8.83088610840498	1.03849690798947e-18	1.0979e-17
ESRRB	8.21332289550486	-0.814525	0.0951734640071566	-8.55831863851389	1.14525465564644e-17	1.09919e-16
ETV7	15.4479804893257	-1.37829	0.147272059789832	-9.35877288990513	8.06680939694988e-21	1.04885e-19
EVC	149.228060037508	-1.02808	0.11604417452491	-8.85936583779758	8.0470885562695e-19	8.61375e-18
EVC2	24.5431354698132	-2.13057	0.15454300901858	-13.7862296148482	3.08465522616362e-43	4.30648e-41
EVI2A	991.667056140149	-0.648987	0.0903414531539156	-7.18371559628418	6.78419166810639e-13	4.02249e-12
EVI2B	341.079410186352	-1.08273	0.0934507065597193	-11.5860703965505	4.84871513336124e-31	1.82499e-29
EXO1	53.891386786979	-1.15442	0.14967976055201	-7.71256738106035	1.23311534423029e-14	8.76127e-14
EXOC3L2	5.80596799921746	-1.86259	0.196613604659402	-9.47335816546166	2.70988584795014e-21	3.72255e-20
EYA1	557.162029429558	0.659369	0.114249006334592	5.77133466795762	7.86460998039116e-09	2.98295e-08
EYA2	239.761110780528	-0.91715	0.115526313273394	-7.93888382587908	2.04008739736178e-15	1.57056e-14
EYA4	67.1913584289856	-2.47231	0.186580610479468	-13.2506514314372	4.47303638829e-40	4.61004e-38
EYS	16.361041365725	0.621019	0.10258189588793	6.05388681027246	1.41391978520453e-09	5.82768e-09
F11R	319.038166071714	-0.828836	0.0766939129962152	-10.8070622844662	3.18713534273304e-27	7.88175e-26
F13A1	281.958343389103	-1.38592	0.156907245534554	-8.83273948540325	1.02142725715363e-18	1.08101e-17
F2RL1	119.428832060566	-1.00594	0.133274819390067	-7.54784053501414	4.4253428829447e-14	2.9772e-13
F2RL2	29.1076778012759	-1.7669	0.181966145800972	-9.71002622774014	2.73266790039604e-22	4.15708e-21
F3	1576.88046802225	-1.00556	0.111131243395505	-9.04835921699099	1.45132640636976e-19	1.66682e-18
FABP5	65.6908127640864	-2.26444	0.155047201751732	-14.604869529149	2.61482365855988e-48	6.12771e-46
FABP5L3	0.754682321722054	-0.717142	0.172567786588562	-4.15571099985163	3.24277515713513e-05	7.95836e-05
FABP7	1723.37896971207	-0.705507	0.119109842804653	-5.92316177248305	3.15809892743915e-09	1.25768e-08
FAH	248.989265811125	-0.702472	0.0701317637280192	-10.0164652189966	1.29035526496541e-23	2.19349e-22
FAHD2B	161.219067301077	-0.636531	0.111310891357244	-5.7184980491053	1.07469750655501e-08	4.025e-08
FAM106A	8.0246331725517	0.701825	0.11713857002864	5.99141025700328	2.08029111737332e-09	8.43819e-09
FAM106C	17.3581299093422	0.966169	0.100108712040999	9.651202280387	4.85827557340576e-22	7.17982e-21
FAM109B	55.4907581051111	-0.908021	0.0739853883454878	-12.2729758116744	1.26516455251041e-34	7.34654e-33
FAM110B	2093.20013006855	0.655702	0.0767853608804272	8.53941248632134	1.34905987360108e-17	1.28612e-16
FAM110C	3.88090169369805	-1.19385	0.219860235538256	-5.43002669008156	5.63456245482069e-08	1.94829e-07
FAM111A	436.646849627754	-0.593274	0.0654679814368809	-9.06204743996102	1.28024494357925e-19	1.47897e-18
FAM111B	66.0209622004233	-0.897015	0.142169375450724	-6.30948053814278	2.79973568669377e-10	1.24549e-09
FAM113B	75.4570868369425	-0.991516	0.0855130934968359	-11.5949023585798	4.37364149522353e-31	1.6525e-29
FAM114A1	108.446989783882	-1.12887	0.0902980682493861	-12.5015615379816	7.31991596885619e-36	4.95163e-34
FAM115C	110.994479774047	-0.954086	0.111326672112948	-8.57015195328504	1.03348579120778e-17	9.94825e-17
FAM119B	162.593230724244	-0.739726	0.0789378725065646	-9.3709855031112	7.18584039045218e-21	9.38641e-20
FAM123C	283.751579777713	1.06966	0.146681863816248	7.29240506193961	3.04470113870895e-13	1.87004e-12
FAM129A	313.67623328724	-1.3889	0.107374021726762	-12.9351800716556	2.84954651202686e-38	2.47107e-36
FAM133A	179.993105101317	0.689339	0.0975408557260515	7.06717822579519	1.58115827139532e-12	8.98271e-12
FAM155A	781.640106380701	0.982988	0.0945509872986608	10.3963844491724	2.57519665371381e-25	5.23145e-24
FAM159A	8.24155849546851	-1.11409	0.121567246722369	-9.16441240165692	4.98176342949717e-20	6.02741e-19
FAM163B	105.007900104694	0.792357	0.160294687679948	4.94312825646319	7.6878870060418e-07	2.32968e-06
FAM164C	42.7931924564584	-0.788495	0.0862272077708825	-9.14439047489134	5.99670704682638e-20	7.20667e-19
FAM166B	12.1368901582538	-0.674126	0.112203872418988	-6.00804284814756	1.87776221871544e-09	7.65137e-09
FAM176B	77.1118639781196	-0.589397	0.0881678468118264	-6.6849429472368	2.31014626496204e-11	1.15772e-10
FAM177B	6.5038199368134	-1.63566	0.167345126092355	-9.77418745809599	1.45318663528233e-22	2.27212e-21
FAM178B	39.2205799095807	-1.13388	0.137116974595902	-8.26943860522712	1.34591261775361e-16	1.16305e-15
FAM180B	12.9658842880952	-2.04096	0.170750893063615	-11.9528744900042	6.27177727707894e-33	2.93952e-31
FAM181A	159.438847745756	-1.37709	0.149230530134836	-9.22791445437906	2.75952285233067e-20	3.4337e-19
FAM183A	6.00133976780332	-4.85053	0.430802042643701	-11.2593088433398	2.08386624209951e-29	6.51624e-28
FAM188B	151.536536207243	-0.755736	0.098943030499743	-7.63809518470225	2.20458862068156e-14	1.52807e-13
FAM190A	17.6201564659997	0.914296	0.136024510814885	6.72155689447307	1.79793006019221e-11	9.14884e-11
FAM196B	124.560671204037	0.779234	0.120567366762628	6.46305538750614	1.02609712768124e-10	4.79894e-10
FAM198B	1537.11633668996	-0.589345	0.090216461674044	-6.53257163899328	6.4649855442525e-11	3.09568e-10
FAM19A2	290.796747874425	0.768887	0.132742408403361	5.79232309102441	6.9419432994581e-09	2.65146e-08
FAM19A3	5.61901484311623	-2.26542	0.199265784332378	-11.3688204299898	5.9790111149975e-30	2.00506e-28
FAM20A	57.6943534687708	-1.56997	0.135614225519287	-11.5767691165327	5.40447517270118e-31	2.02257e-29
FAM20C	1229.4653254965	-0.741431	0.073805150210364	-10.0457875618636	9.58787055231595e-24	1.64549e-22
FAM26F	41.2351968565233	-1.41748	0.117541160291692	-12.0594100198324	1.7301785718632e-33	8.68841e-32
FAM3B	4.83875120399327	-1.55457	0.199707026355948	-7.78427469354787	7.01142714681477e-15	5.08174e-14
FAM3D	0.723712072516008	-1.51489	0.295919768363283	-5.11926591370171	3.06727224819605e-07	9.7496e-07
FAM46A	261.390424411993	-0.72083	0.0873597676882922	-8.25128464685123	1.56700811639585e-16	1.34466e-15
FAM46B	34.2341713412224	-1.74596	0.147729600611179	-11.8186088017742	3.12821919410111e-32	1.36539e-30
FAM50B	156.407959725785	-0.709487	0.102664830242118	-6.91070813326179	4.82240329691476e-12	2.59582e-11
FAM53A	10.4027724763829	-0.683353	0.0993560642348783	-6.87781483286102	6.07775967578263e-12	3.23791e-11
FAM54A	15.0556372892628	-0.786338	0.11097376121071	-7.08580331988979	1.38240027451279e-12	7.90603e-12
FAM57B	777.962366882011	0.673379	0.0860158492390488	7.82855045321797	4.93526894632284e-15	3.63316e-14
FAM64A	159.673737839395	-1.0372	0.154310535929952	-6.72153795312394	1.79816384290425e-11	9.14884e-11
FAM65C	61.6198366920605	-0.621103	0.116940949370402	-5.3112505204919	1.08875540463893e-07	3.64554e-07
FAM66A	8.27388144132491	0.680072	0.0892305314449622	7.62151805232728	2.50709568101624e-14	1.72439e-13
FAM66E	5.79706127589483	0.666571	0.102890098539174	6.47848015639204	9.26511134986624e-11	4.34972e-10
FAM70B	25.3368775756253	-0.911412	0.0958645495402497	-9.50728716680981	1.95699382155298e-21	2.72636e-20
FAM72A	9.85309169748798	-0.685392	0.0883960244941893	-7.75365288031968	8.92861821908743e-15	6.41693e-14
FAM72B	61.2615737993983	-0.662642	0.0755970698018416	-8.76544038265199	1.86047964024963e-18	1.92857e-17
FAM81B	15.4949579752911	-4.31334	0.320826793199259	-13.4444371168623	3.31921874180608e-41	3.82098e-39
FAM83D	58.0654159218602	-0.928892	0.124776951560032	-7.44441809432916	9.73726627159008e-14	6.32184e-13
FAM86B2	4.80768000149155	-1.01421	0.212953583245407	-4.76259467785784	1.91119478415982e-06	5.52856e-06
FAM92B	1.49384110018164	-3.89573	0.63180382832888	-6.16604105058356	7.00209138556455e-10	2.98541e-09
FANCA	129.376398990314	-0.611095	0.102973727774983	-5.93447525093997	2.94786792590431e-09	1.1761e-08
FANCI	360.028377620664	-0.643903	0.102960612596181	-6.25387642740558	4.00387861025079e-10	1.75031e-09
FANK1	38.0695047339429	-0.703889	0.0967093136900286	-7.27839557607934	3.37813563921944e-13	2.06774e-12
FAP	38.7712221961006	-1.37981	0.137645740416519	-10.0243274678901	1.19168111024784e-23	2.03102e-22
FASLG	1.05243321914389	-2.56661	0.28638116004385	-8.96222530117461	3.18190897773042e-19	3.55482e-18
FAT2	13.0141762030802	0.679294	0.0827256888262835	8.21139734443754	2.18629083699814e-16	1.85906e-15
FBLIM1	150.919923068908	-0.909617	0.10815822285956	-8.41005672336241	4.09812484360052e-17	3.7348e-16
FBLL1	369.165591037108	0.693144	0.0911958936386731	7.60061075200974	2.94736396734553e-14	2.01454e-13
FBLN1	619.096256813603	-0.817007	0.111041040366786	-7.35770381673109	1.87100605607731e-13	1.1737e-12
FBLN5	410.064694248183	-1.23588	0.10845746657788	-11.3950609223739	4.42520365926377e-30	1.50449e-28
FBLN7	84.2232021591996	-0.661198	0.155181946112799	-4.26078906047802	2.03706428002218e-05	5.14824e-05
FBP1	70.4850019518057	-1.1531	0.0966453383581961	-11.9312203437438	8.13717689951658e-33	3.73381e-31
FBXL13	8.02207343617513	-0.896467	0.0996848790385289	-8.99300544297188	2.4056033332466e-19	2.70906e-18
FBXO17	149.911943533676	-1.37484	0.132586268252018	-10.369375494321	3.41750848904864e-25	6.87167e-24
FBXO32	564.677836446817	-0.834234	0.0916897949932673	-9.0984399406514	9.16386155134955e-20	1.07954e-18
FBXO39	2.95075060889582	-1.66542	0.282891350441945	-5.88715190824527	3.92907549236619e-09	1.54533e-08
FBXO41	1101.94711827296	0.618066	0.0986688680179615	6.26404024584404	3.75128589811448e-10	1.6461e-09
FBXO43	10.0185409697478	-0.723083	0.102093325165513	-7.08257090814456	1.41504313527365e-12	8.08098e-12
FBXW12	1.19942883215839	0.716214	0.147419614927891	4.8583368797594	1.18375875256563e-06	3.51627e-06
FCER1A	9.87991177082749	-1.26663	0.212023542641136	-5.9739871852432	2.31523996258625e-09	9.33733e-09
FCER1G	454.008458427835	-1.13441	0.08961333397053	-12.6589196981908	9.98641041151172e-37	7.36264e-35
FCGBP	2972.35512515038	-1.6653	0.152669109739198	-10.9079230080037	1.05642406290175e-27	2.75805e-26
FCGR1A	321.272184550963	-0.962759	0.104728171436191	-9.19293618369284	3.82261808268986e-20	4.69129e-19
FCGR1B	339.754346741624	-0.816662	0.100439221908936	-8.13091038517801	4.26078257039062e-16	3.52558e-15
FCGR1C	119.250533820768	-0.928877	0.106630211180281	-8.71119754795665	3.00681127678329e-18	3.05729e-17
FCGR2A	609.922489976085	-1.28504	0.0971483203926618	-13.2276328563349	6.07713293029891e-40	6.19836e-38
FCGR2B	42.1336792867027	-2.35431	0.17901010971275	-13.1518031305548	1.66164077167941e-39	1.57257e-37
FCGR2C	22.8427125127959	-2.25712	0.158107422665439	-14.2758918080839	3.09305500470938e-46	5.79874e-44
FCGR3A	1453.88497737574	-1.69072	0.119123630291666	-14.1929734052005	1.01271990525739e-45	1.74872e-43
FCHSD1	140.968154408071	-0.674426	0.0798498555410065	-8.44617072147492	3.01013406364269e-17	2.78845e-16
FCN3	2.94250889292449	-0.751976	0.180512770920955	-4.16577824059994	3.10292217284874e-05	7.64181e-05
FCRL6	2.53115818732861	-1.34203	0.156072242747485	-8.598777552169	8.05696812144525e-18	7.83217e-17
FER1L4	6.81311721679931	-0.89332	0.145285635141838	-6.14871443717692	7.81134680973257e-10	3.31036e-09
FERMT1	1694.0541326048	0.652721	0.118810636052833	5.49379345510375	3.93390554987309e-08	1.38407e-07
FERMT3	349.089937981196	-0.859858	0.0846703330608727	-10.155358229121	3.13656161568357e-24	5.64897e-23
FES	169.535354487215	-0.705795	0.0701648094484504	-10.0591063588956	8.37551355643937e-24	1.44498e-22
FEZF1	3.36106307895131	-3.64161	0.408723515759042	-8.9097163324661	5.11632987202717e-19	5.56436e-18
FGF1	4106.52462181805	-0.832332	0.0927969995170866	-8.96938070531132	2.9818622632885e-19	3.34271e-18
FGF20	5.71442954189551	-0.930494	0.11932950375439	-7.7976844052669	6.30534588926433e-15	4.59026e-14
FGF5	3.43357723366018	0.95129	0.199269238087158	4.77389156221901	1.80699703530358e-06	5.24178e-06
FGFBP2	30.9036468779201	-1.76243	0.159371304307518	-11.0586536352723	1.99063092897765e-28	5.67085e-27
FGFBP3	598.40598854845	1.03345	0.0943654740913909	10.95161646597	6.52722548480885e-28	1.7434e-26
FGFR3	2557.01529041354	-0.784547	0.125911980569481	-6.23092015457019	4.6370341551361e-10	2.01457e-09
FGFRL1	570.034378968591	-0.950928	0.0994008778350448	-9.56659978287287	1.10479411077518e-21	1.57365e-20
FGL1	7.78418596617774	-0.780771	0.190356464645305	-4.10162687985032	4.10255444536797e-05	9.9567e-05
FGL2	343.932523126419	-1.08742	0.100632350151416	-10.8058554925212	3.22932612987459e-27	7.95611e-26
FHAD1	22.0701857833833	-1.81651	0.144928302393781	-12.5338394879339	4.87444601862661e-36	3.36679e-34
FHDC1	433.320307781951	1.12704	0.104790385565802	10.7552279592831	5.59953960755689e-27	1.34917e-25
FHL3	373.841788427372	-0.716375	0.064494555263889	-11.1075287692538	1.15306454993927e-28	3.37769e-27
FIGF	5.08415242286735	-0.601105	0.135307906466931	-4.44249404569554	8.89220949447398e-06	2.35977e-05
FILIP1L	326.648734025034	-1.08882	0.0973389360784046	-11.1858782705923	4.7814771736982e-29	1.45028e-27
FKBP5	1620.55865790082	-0.979167	0.120020514238021	-8.15832723342414	3.39696166086056e-16	2.83344e-15
FKBP9	1110.94095551498	-0.947764	0.0868114980557796	-10.9174902053773	9.50870973648526e-28	2.48908e-26
FKBP9L	26.9519982018558	-1.2049	0.106068002853034	-11.3596724699895	6.63930858216458e-30	2.20768e-28
FLJ10661	6.87025885833736	-0.600913	0.120565702088627	-4.98411193465429	6.22470387043866e-07	1.9072e-06
FLJ26850	10.6060618975583	-1.32285	0.117439425955801	-11.2641382811114	1.97272299518435e-29	6.19347e-28
FLJ34503	2.04191721161143	0.720466	0.141557252945025	5.08957245225161	3.58871725736004e-07	1.13211e-06
FLJ35776	64.8279534236109	-0.670824	0.0745303380778403	-9.00067926533146	2.2432540264316e-19	2.53347e-18
FLJ36777	5.49734047096488	-0.791389	0.0994289911546223	-7.95933525855967	1.72965993594356e-15	1.34366e-14
FLJ43390	237.706390051735	0.742132	0.131090387939615	5.66122314114422	1.5029783791335e-08	5.54671e-08
FLJ44606	22.0931192824078	-0.726374	0.119563919638481	-6.07518998815404	1.23841010672903e-09	5.13764e-09
FLNA	7308.77668903949	-0.760067	0.079091123253699	-9.6100146412512	7.25386709176365e-22	1.05552e-20
FLNC	1369.48174272971	-2.15187	0.135400030048796	-15.8926926318144	7.12022444335382e-57	3.81586e-54
FLRT1	653.390085569305	0.718447	0.070755123797714	10.1539876981586	3.1809405808962e-24	5.72366e-23
FMO4	50.7101632531351	-0.593575	0.065882630345948	-9.00958010635258	2.06846927466771e-19	2.34956e-18
FMOD	325.744128588839	-2.67627	0.171181218567624	-15.6341484668986	4.26133252124999e-55	1.9508e-52
FN1	8523.49432358167	-1.01752	0.100473444950387	-10.1272932782977	4.18061763837855e-24	7.42069e-23
FNDC1	24.6820443962602	-1.95682	0.190794922766122	-10.2561258386984	1.1107398625223e-24	2.10848e-23
FNDC3B	407.692441627607	-0.652873	0.0606832647764121	-10.7586993638452	5.39258707976872e-27	1.30249e-25
FNDC7	6.45651780204943	-1.30537	0.167872992647894	-7.77595394425999	7.4880948787521e-15	5.40929e-14
FOLH1	331.159845580825	-0.723279	0.145012588665384	-4.9876958063797	6.11036780346165e-07	1.87356e-06
FOLR1	35.656440761152	-1.0834	0.141315901436104	-7.66652517624623	1.76718490039141e-14	1.23753e-13
FOSL1	52.71886482909	-1.19894	0.147204733244871	-8.14474087276441	3.80095005021479e-16	3.15837e-15
FOXA2	1.01782710077311	-2.37245	0.485183166500366	-4.88979806288136	1.00939473803247e-06	3.01975e-06
FOXA3	2.98340384920493	-1.23361	0.208880856856545	-5.90582117412791	3.5089444348353e-09	1.38813e-08
FOXD4L2	10.2859659940102	0.637117	0.0959506602920556	6.64004877313332	3.13579372115388e-11	1.55252e-10
FOXJ1	386.919513580813	-2.04518	0.139606277559267	-14.6496295593146	1.35452175189868e-48	3.29182e-46
FOXM1	505.723348996999	-1.01626	0.135324056966075	-7.5097997024406	5.9217898063137e-14	3.93022e-13
FPGT	204.054329982127	-0.668683	0.0532085155981706	-12.5672087885302	3.19816812320683e-36	2.24042e-34
FPR1	383.528204503729	-1.24954	0.121498745687631	-10.2843780479647	8.2875392323826e-25	1.59317e-23
FPR2	7.11432974049433	-1.28053	0.191585215667133	-6.68387629047441	2.32703268921694e-11	1.16559e-10
FPR3	102.633985473287	-1.24157	0.143034540448729	-8.68020758560529	3.95047131509044e-18	3.96154e-17
FRMD4B	354.860367017383	-0.617553	0.0835235866993666	-7.39375245404088	1.42742046771707e-13	9.09051e-13
FRMPD1	129.97925576978	0.938014	0.0882809313241513	10.6253242799418	2.27221081920925e-26	5.18892e-25
FRRS1	6.20919157080462	-1.69192	0.158159557957479	-10.6975775024297	1.04473821393347e-26	2.47184e-25
FRZB	277.990190557537	-0.838332	0.0921099015786814	-9.10143409511597	8.91468141421048e-20	1.05081e-18
FSIP1	20.5855226206506	-0.723682	0.0907021482376088	-7.97866989791925	1.47918580383168e-15	1.15869e-14
FSTL1	1854.62537849553	-1.49787	0.0891483432717369	-16.8019737114641	2.36056601202357e-63	2.7334e-60
FTL	27605.7863132947	-0.973515	0.0674713250436553	-14.4285697663214	3.42101716630637e-47	7.31986e-45
FUCA1	344.645253944134	-0.734001	0.0585911189291911	-12.5275173583572	5.27894007762481e-36	3.62076e-34
FUCA2	506.554695095547	-0.919616	0.0733607000552505	-12.5355422008271	4.77087305044454e-36	3.30685e-34
FXYD1	348.376368240167	-1.09003	0.152867227447229	-7.13059545300314	9.99356426451292e-13	5.80647e-12
FXYD2	11.5341517832269	0.864164	0.118396745495009	7.2988821989983	2.90168224313133e-13	1.78709e-12
FXYD3	19.6644007992695	-1.30553	0.140400634357714	-9.29863358039033	1.42262126689797e-20	1.81023e-19
FXYD5	390.945944079768	-0.958789	0.0823447142678744	-11.643602345672	2.47343309154957e-31	9.60346e-30
FYB	495.769248159414	-1.11599	0.0956044143851875	-11.6729524071979	1.75234372605944e-31	6.98672e-30
FZD1	348.354610290497	-0.718372	0.0693113297958342	-10.3644167187441	3.59947751148672e-25	7.21545e-24
FZD2	84.5973831917493	-0.87463	0.0980729113154972	-8.91816548245289	4.74075668059055e-19	5.17879e-18
FZD6	124.571366745415	-0.991057	0.0915337116646778	-10.8272401998682	2.5574743163515e-27	6.36459e-26
FZD7	470.627010628058	-0.581599	0.108203346619407	-5.37505674495925	7.6558567436424e-08	2.60781e-07
FZD8	113.220411851093	-0.602853	0.0950947548044131	-6.33949719195365	2.30516216081798e-10	1.03648e-09
G0S2	30.0203893632156	-1.87226	0.194702391064997	-9.61602205094892	6.84263780308135e-22	9.9998e-21
G6PC	1.58693852769378	1.39552	0.223683991809776	6.238779563984	4.40997918810222e-10	1.92058e-09
G6PC2	15.3803041076467	1.41664	0.220750900587688	6.4173828219692	1.38636992854636e-10	6.3808e-10
GAB3	120.108286895883	-0.620668	0.070372385178999	-8.81976491740628	1.14700271520236e-18	1.20807e-17
GABBR1	11620.4815519226	0.839096	0.0818162590663725	10.2558638303598	1.11375654347724e-24	2.11217e-23
GABRA3	413.316943354142	0.979781	0.119903746226607	8.1713940590758	3.0484613287342e-16	2.5514e-15
GABRB1	92.6304293382543	0.587495	0.116397224843934	5.04733035264537	4.48026289686326e-07	1.39393e-06
GABRB3	1610.48012988728	0.825131	0.105703305188475	7.80610054224506	5.89845316478324e-15	4.31319e-14
GABRE	34.1019457539923	-0.672562	0.13262713236984	-5.07107382778867	3.95577265480518e-07	1.24075e-06
GABRG2	746.804617496307	0.818501	0.171307915774582	4.77795264124725	1.77089075065413e-06	5.14311e-06
GABRQ	37.6184297590435	0.620829	0.136819347774597	4.53758161771034	5.69030103343467e-06	1.55015e-05
GAD1	1423.87297746748	0.767944	0.108450323858994	7.08106816558917	1.43047511899473e-12	8.16437e-12
GADD45A	790.959603008872	-0.61393	0.10270529119193	-5.97759036789375	2.26462308680159e-09	9.14631e-09
GAL3ST4	653.684727504037	-0.622548	0.0652505331465039	-9.54088168719478	1.41623077664628e-21	1.9899e-20
GALM	162.614383940604	-0.789528	0.0689114969711413	-11.4571233944948	2.16589421636663e-30	7.55951e-29
GALNT12	29.9536191374634	-0.745446	0.0903602354256381	-8.24971170921967	1.58777089576969e-16	1.36129e-15
GALNT13	3057.21361263282	0.744505	0.0988696354727654	7.53016671387606	5.06755794983452e-14	3.38841e-13
GALNT3	30.4114168313046	-2.09021	0.138648083073735	-15.0756731938794	2.34117352372872e-51	7.20094e-49
GALNT4	150.418728881206	-0.734244	0.063990584247725	-11.4742500314646	1.77711778708715e-30	6.344e-29
GALNT5	7.49530685100726	-4.17716	0.417703937782269	-10.0002925503346	1.51947506914953e-23	2.56746e-22
GALNT6	122.669191434783	-0.809594	0.116391567316422	-6.95577924590302	3.50618528387757e-12	1.91454e-11
GALNTL6	12.5140373584183	0.839282	0.186552459304751	4.49890419847257	6.83046276877666e-06	1.83861e-05
GALR3	2.14308062563629	0.600702	0.133035882218492	4.51533496706341	6.32167615779994e-06	1.70984e-05
GAPT	34.0130639455683	-1.75398	0.128109251195895	-13.6912738402383	1.14484447821329e-42	1.55423e-40
GAS2L2	11.9988864114989	-1.7032	0.180320457683156	-9.4454121124296	3.54008483945109e-21	4.79593e-20
GAS2L3	22.9447992948581	-1.17986	0.15553944897756	-7.58561285985202	3.30919129449692e-14	2.24936e-13
GATA3	7.53948212330008	-1.63658	0.18568260995486	-8.81383310178901	1.20938059826504e-18	1.2724e-17
GATA4	5.36092584818013	-3.51308	0.45118986110037	-7.78625798063239	6.90229445978228e-15	5.01002e-14
GATA5	5.72455592132702	1.12965	0.245710707994278	4.59747623143809	4.27639395021259e-06	1.18431e-05
GATA6	5.11089180696297	-1.13887	0.234737710072968	-4.85167726824212	1.22421719046964e-06	3.62932e-06
GATSL2	32.7404293291217	0.637383	0.139271507726261	4.57655027820524	4.72706139559637e-06	1.30307e-05
GBA3	1.48138463621453	-2.2454	0.295734478266409	-7.59263778968635	3.13457866962753e-14	2.13509e-13
GBGT1	100.587929314222	-0.833749	0.0755799034119711	-11.0313637146696	2.69743386490031e-28	7.53177e-27
GBP1	713.914012142845	-1.88548	0.124060092278824	-15.1980859377202	3.64105125064512e-52	1.25744e-49
GBP2	972.106888201384	-1.43593	0.134158599708959	-10.7031955993509	9.83275719867914e-27	2.33765e-25
GBP3	429.53085523533	-1.18823	0.121569635417196	-9.77406342206468	1.45496756138985e-22	2.2731e-21
GBP4	312.622753726108	-0.779326	0.0897323190778885	-8.68501253587274	3.7870061617019e-18	3.81121e-17
GBP5	51.8692169975659	-2.64443	0.156216016839751	-16.9280176506503	2.79640299359784e-64	3.44045e-61
GBP6	6.35429189946647	-1.14274	0.168721225351972	-6.77296149182037	1.2617254414043e-11	6.51208e-11
GCA	360.500886407208	-0.678912	0.0620969052777968	-10.933107354999	8.00590764305767e-28	2.11823e-26
GCET2	1.92909882057548	-1.5277	0.174143676933587	-8.77264588869056	1.74516190824723e-18	1.81477e-17
GCH1	48.4956312246027	-0.915027	0.0895377550000751	-10.2194575985516	1.62246160458756e-24	3.02445e-23
GCK	52.2589694393654	-1.34574	0.124541698007856	-10.8055451991322	3.24026354649133e-27	7.97307e-26
GCLM	213.01074772198	-0.632085	0.0610733538387177	-10.3496019010868	4.20229503419365e-25	8.34734e-24
GCNT1	55.1157772091556	-0.953677	0.0962666842068328	-9.9066114259152	3.89637415477362e-23	6.37574e-22
GCNT2	231.643632858442	0.709021	0.0932127825221816	7.60647582517076	2.81670886244343e-14	1.92868e-13
GCOM1	60.9672246284364	-1.16611	0.149821727195191	-7.78331668790936	7.06474909477896e-15	5.11661e-14
GDAP1L1	1213.85962047928	0.794537	0.101843207148841	7.80156611183088	6.11435601485774e-15	4.45782e-14
GDF15	46.9775558876583	-2.38203	0.178161233830726	-13.3701018623648	9.04169447725368e-41	9.8881e-39
GDF5	13.2390921762016	-1.58585	0.135118571292603	-11.7367613524746	8.25888841103877e-32	3.46644e-30
GDNF	5.47753515791003	0.652909	0.1442253936208	4.52700702417589	5.98249522905099e-06	1.6239e-05
GDPD2	226.376544616651	-0.840302	0.110986720428933	-7.57119722625421	3.69800110925043e-14	2.50155e-13
GEM	443.795793513242	-0.596467	0.11495033679416	-5.18890791188519	2.11530965305945e-07	6.84304e-07
GFAP	428607.035408234	-0.717228	0.104824079176792	-6.8422082063	7.79816350724165e-12	4.10446e-11
GFI1	4.56880402120881	-1.23255	0.113990497223565	-10.8127195597308	2.99652482950623e-27	7.42904e-26
GFOD1	90.2029754017649	0.642081	0.0989708401346096	6.48757693312413	8.72278023698743e-11	4.10883e-10
GFRA1	1277.07931328526	1.08889	0.118616109423066	9.17997925608857	4.31174482214804e-20	5.2393e-19
GGH	279.6653426372	-0.614759	0.0597017888045579	-10.2971685608866	7.25657783954204e-25	1.40596e-23
GGT8P	4.54673912401611	-2.85761	0.314594555595412	-9.08346692568556	1.05170318306779e-19	1.22938e-18
GIMAP2	126.53679546457	-0.898453	0.073345353195738	-12.249622680404	1.68779343056963e-34	9.63021e-33
GIMAP4	447.293158251882	-0.780055	0.0719131238822146	-10.8471791385728	2.05675178051886e-27	5.16418e-26
GINS2	118.066333452177	-0.700629	0.0992970830534891	-7.05589031192258	1.71499072150674e-12	9.68434e-12
GINS4	70.5929230103093	-0.821078	0.0740266363508662	-11.0916559381435	1.37714551736347e-28	4.01616e-27
GIPC2	8.6898649830226	-0.702488	0.110895243862688	-6.33470308439093	2.37798761717483e-10	1.06679e-09
GJA1	11423.0254369585	-0.814855	0.11275856305759	-7.22654493917975	4.95436732632734e-13	2.97882e-12
GJA9	3.81831334418841	-0.598969	0.0922447777430864	-6.49325549409904	8.40010496636207e-11	3.96442e-10
GJB1	477.56015582445	-0.805997	0.155134561521996	-5.19546769368885	2.04205797973711e-07	6.61948e-07
GJB2	60.061016255023	-0.993099	0.178034182016884	-5.57813438367736	2.43111816068653e-08	8.77619e-08
GJC1	215.3243121518	-0.783891	0.0948018459308609	-8.26872673353184	1.3539721044918e-16	1.16899e-15
GJC2	260.39129589348	-0.697498	0.125996795887113	-5.53584295179618	3.09735015784261e-08	1.10315e-07
GJD2	14.4149061712636	1.12015	0.232206698933639	4.82393555927517	1.40752909176487e-06	4.14159e-06
GJD3	21.3631044452175	-1.52552	0.143681301750754	-10.6174120016502	2.47322950930328e-26	5.6349e-25
GLDN	583.614636158893	-0.884753	0.106302995754284	-8.32293511167544	8.58114281744493e-17	7.56132e-16
GLI1	15.8130352697906	-0.588608	0.1375228724382	-4.280074355877	1.86830882986471e-05	4.75102e-05
GLI3	306.537032015756	-0.673907	0.0862278094026028	-7.81542750261571	5.47767978213815e-15	4.01744e-14
GLIPR1	438.747195080864	-0.828975	0.0866120823772752	-9.57112421771884	1.05749433633596e-21	1.50846e-20
GLIS3	677.163601210794	-0.922225	0.0985773026825464	-9.35534665525388	8.33260192407034e-21	1.08126e-19
GLP1R	31.3945347223249	1.57934	0.2222587424371	7.10587991271519	1.1955833889067e-12	6.87155e-12
GLRA1	3.03908606905085	2.36343	0.264172081694745	8.94654370704655	3.66786753210502e-19	4.07001e-18
GLRA3	61.7783824240473	1.39926	0.171723447921833	8.14834206218947	3.68947501102041e-16	3.06962e-15
GLRX	319.468905547751	-0.655558	0.0617641513944242	-10.6138886966754	2.56832315309806e-26	5.83131e-25
GMFG	204.774557761984	-0.768091	0.0739675461072409	-10.3841608018084	2.92732352379681e-25	5.91019e-24
GMPR	417.535909877561	-1.20242	0.120832138895619	-9.95113165671096	2.49331590004673e-23	4.14185e-22
GNA14	57.5897119691597	-0.586002	0.100019621131084	-5.85887243148408	4.66020498293247e-09	1.81944e-08
GNA15	111.904471296857	-0.646594	0.0853780520764374	-7.57330510909314	3.63846395516318e-14	2.46297e-13
GNAL	368.233417143313	0.94162	0.100205647516139	9.39688032915524	5.62047997821384e-21	7.45547e-20
GNASAS	3.93989933430057	-0.738844	0.116231746601911	-6.35664534600035	2.06207328141106e-10	9.3058e-10
GNG12	1080.21222566421	-1.32392	0.100645978973561	-13.1541992914212	1.60979798470956e-39	1.53098e-37
GNG4	1732.38594153597	0.636867	0.0728639111089147	8.74049810110184	2.32084879598448e-18	2.38196e-17
GNG5	865.655979455324	-0.934529	0.070450125116356	-13.2651212098877	3.68824026678981e-40	3.84143e-38
GNGT2	23.8192256335372	-0.930639	0.0867055559354154	-10.733331496697	7.09897350286836e-27	1.69797e-25
GNLY	31.8655859308319	-2.19675	0.16777904281132	-13.0931223716288	3.60478777641144e-39	3.33147e-37
GNRHR	7.23559934297038	0.616144	0.0957646299998158	6.43394475245996	1.24334067774825e-10	5.76022e-10
GOLGA2B	51.6589549243634	-0.64675	0.0978786194532219	-6.60767742084069	3.90396183873636e-11	1.91597e-10
GOLGA6B	5.89221267833948	0.643397	0.116110930556193	5.54123094086697	3.00352793328274e-08	1.0711e-07
GOLGA8A	1941.67409857642	0.693757	0.087040181116428	7.97053922635424	1.57983508534268e-15	1.23409e-14
GOLGA8B	865.772291439496	0.721308	0.0957327571595912	7.53460415935771	4.89818393682e-14	3.27962e-13
GPA33	1.57852787553653	-1.17477	0.192959378263739	-6.08814818799519	1.1422412490468e-09	4.76075e-09
GPAT2	32.8086851996399	-0.795764	0.114572956818121	-6.94547729979653	3.77182875986191e-12	2.05333e-11
GPC3	35.7046027498941	-1.08298	0.144088354653403	-7.51611298347158	5.64287928038351e-14	3.75497e-13
GPD1	542.114533265813	-0.948096	0.13270889109941	-7.14417959438093	9.05349691577486e-13	5.28837e-12
GPLD1	60.3501128669827	0.700749	0.0796180926063408	8.80138517501536	1.35137666660729e-18	1.41725e-17
GPNMB	974.67649692679	-1.45527	0.144016044965776	-10.1049363103977	5.25296912425541e-24	9.24081e-23
GPR1	7.10380924755612	-3.79788	0.321825124093398	-11.8010734023564	3.85364102470461e-32	1.6709e-30
GPR114	18.6325356732353	-1.12601	0.134025493172197	-8.40148400280119	4.40871243323417e-17	4.00487e-16
GPR120	8.50405728913709	-0.724265	0.122817100310294	-5.89710319485432	3.69938518522096e-09	1.46024e-08
GPR123	1043.03673932921	0.70785	0.0750799936278921	9.42794583723559	4.18198413150081e-21	5.6381e-20
GPR126	93.9768384541204	-0.665577	0.107959316430112	-6.16507471702199	7.04498670884923e-10	3.0017e-09
GPR128	3.22161679352664	-4.6973	0.802040905420446	-5.85668737572165	4.72190781070306e-09	1.84207e-08
GPR132	51.7721186911541	-0.878347	0.0972485718518446	-9.03198132689001	1.68591198076632e-19	1.92613e-18
GPR141	1.64126954074977	-2.41655	0.247959845466816	-9.74571224282209	1.92424712652884e-22	2.96391e-21
GPR144	1.02623109288514	-2.67236	0.606328202632011	-4.40745617683367	1.04591753766473e-05	2.74738e-05
GPR156	11.521590936744	-0.686396	0.134993071568028	-5.08467850377485	3.68249295622703e-07	1.1591e-06
GPR157	1.20108695367208	-1.68441	0.239453030574346	-7.03440102784479	2.00118789366837e-12	1.12232e-11
GPR158	1388.92956148695	0.722346	0.0854594786851752	8.45249436001873	2.85144335496715e-17	2.64886e-16
GPR160	44.2822772769487	-0.826012	0.0812522246318926	-10.1660252929908	2.81148273037519e-24	5.08677e-23
GPR17	2526.98774016358	0.958177	0.144837677127125	6.61552649081325	3.70231675292094e-11	1.82291e-10
GPR171	2.53331241590394	-2.03383	0.19511958331398	-10.4234832049801	1.93725582513058e-25	3.99737e-24
GPR172B	3.72123077418503	-1.26326	0.149996454211256	-8.42194914562102	3.70271792697394e-17	3.38856e-16
GPR173	393.282228004107	0.686558	0.056498630333717	12.1517692146361	5.61374719881989e-34	2.96264e-32
GPR174	0.505084723649801	-1.71278	0.412888008024716	-4.1483002880098	3.34952864638154e-05	8.20093e-05
GPR179	84.6019010639835	0.734706	0.113479343140997	6.47436134942079	9.5213794797401e-11	4.46258e-10
GPR18	1.18741892143495	-2.3334	0.242987150978214	-9.60298993048514	7.76583366449172e-22	1.12736e-20
GPR183	126.373592750596	-0.848839	0.115519860195281	-7.34799207558708	2.01206424689121e-13	1.25898e-12
GPR21	9.86927754920049	0.744061	0.154363396278086	4.82019260559023	1.43419687568958e-06	4.21564e-06
GPR26	126.468431355523	1.1067	0.237897114022472	4.65201065196847	3.28714094974732e-06	9.23863e-06
GPR27	33.5054507027358	1.05205	0.117953417366789	8.91920567741713	4.6964444431292e-19	5.13323e-18
GPR3	50.5176952965027	-0.615472	0.127036495719759	-4.84484638354828	1.26709677338944e-06	3.74967e-06
GPR34	749.16951240258	-0.63144	0.0977604774652743	-6.45904763203671	1.05363947964416e-10	4.9219e-10
GPR37	1175.03118438262	-0.982537	0.12207026141655	-8.04894672161858	8.3509588882988e-16	6.69797e-15
GPR45	27.2773555606114	0.977929	0.100930141164535	9.68916601718167	3.35254972275126e-22	5.04548e-21
GPR55	11.0083514705137	-1.2171	0.129933918173747	-9.3670387971942	7.45959684840827e-21	9.73109e-20
GPR62	117.409414060612	-0.709773	0.140815415719147	-5.04044753535022	4.64444443574813e-07	1.44244e-06
GPR65	59.6019027602801	-1.84974	0.122488101009487	-15.1013724406207	1.5859760959379e-51	4.95555e-49
GPR82	16.0153951352601	-1.91414	0.195769534350731	-9.77750726227679	1.40631399633356e-22	2.20408e-21
GPR84	21.8937862692089	-1.25277	0.128115469942545	-9.77843144911702	1.39353375055863e-22	2.18579e-21
GPR98	2733.6230396919	0.991786	0.107165219843048	9.25473352518798	2.14765441002378e-20	2.68935e-19
GPRC5A	25.3882477191991	-2.05295	0.174051970304373	-11.7950485162485	4.13961991695336e-32	1.78312e-30
GPRIN1	989.839380513961	0.76812	0.0815902871580729	9.41436139453884	4.75966857306265e-21	6.36509e-20
GPSM3	371.583728185286	-0.834975	0.0763993962894867	-10.9290732749628	8.36988153392761e-28	2.21156e-26
GPX7	160.83646424765	-0.603661	0.0647769893729964	-9.31906707630887	1.17367714548901e-20	1.50514e-19
GPX8	58.2712355044974	-2.40448	0.143957957255657	-16.7026740639953	1.25320242017016e-62	1.17473e-59
GRAMD1B	349.895442061453	0.700108	0.0844105591088494	8.2940810712634	1.09427807329695e-16	9.56097e-16
GRAP2	5.21204273494648	-1.04878	0.142030099839499	-7.38419701984271	1.53376189606986e-13	9.71119e-13
GRB14	24.5167602158174	-1.00165	0.19866461190082	-5.04191674471555	4.60891817298987e-07	1.43215e-06
GREB1L	62.5118871746052	0.738789	0.134776131099081	5.48159906528913	4.214985922041e-08	1.47874e-07
GREM1	136.448594953907	-1.14069	0.170712714787448	-6.68194787256417	2.35786904640648e-11	1.18013e-10
GRIA2	4091.45955287218	0.836034	0.0758587643015249	11.0209225280216	3.02938277411801e-28	8.37548e-27
GRID2	221.148463327378	0.793719	0.110047726718707	7.21249509705957	5.49358093579991e-13	3.28996e-12
GRID2IP	27.2443733946293	1.06683	0.0797827804459878	13.3717402903328	8.84469730861253e-41	9.7267e-39
GRIK1	177.89864353717	-1.11348	0.161474984688457	-6.89567485481033	5.36096870342487e-12	2.8669e-11
GRIK2	1184.90271901741	0.878645	0.0858837220726712	10.2306372673523	1.44564917972151e-24	2.71542e-23
GRIN1	2074.83958704871	0.747376	0.172634969641861	4.32922991560718	1.4963165467107e-05	3.85587e-05
GRIN2B	25.6267198679563	1.16005	0.187094355749525	6.20033587553781	5.63427884929588e-10	2.42534e-09
GRIN3A	333.939907010727	1.34059	0.145296877026682	9.22657906096304	2.79413142228228e-20	3.47457e-19
GRIP1	63.7694516122415	0.7913	0.111805479417798	7.07746732543032	1.46812792904335e-12	8.36714e-12
GRIP2	39.6811773736959	1.35963	0.141839835394986	9.58566579461454	9.18632220206215e-22	1.32188e-20
GRM4	53.5782527903884	0.775295	0.156779536835657	4.94513104665374	7.60926587433672e-07	2.30763e-06
GRM5	551.501860212142	0.683772	0.142523624157015	4.79760754658393	1.60571998492206e-06	4.68901e-06
GSDMA	8.3870572248397	-1.34581	0.18223540510551	-7.38501511607054	1.52436069317796e-13	9.65788e-13
GSDMD	305.213908997234	-0.961602	0.0816798849235465	-11.7728072785786	5.39004797021776e-32	2.29164e-30
GSG2	19.6393897754783	-0.749451	0.132878011246518	-5.64014328078448	1.69908719938326e-08	6.23729e-08
GSN	8464.28995500975	-0.79338	0.074099928216499	-10.7068976281136	9.447488692776e-27	2.24878e-25
GSTM5	290.867331868367	-0.99244	0.157816994093857	-6.28854927641374	3.20446356446102e-10	1.41657e-09
GSX2	7.07237247044596	-2.63012	0.273999707842551	-9.59900368889634	8.07208925626388e-22	1.16666e-20
GTSE1	104.861392856275	-0.828694	0.135423459194445	-6.11928084533201	9.39986092419939e-10	3.95292e-09
GTSF1	2.44629445704558	-1.15838	0.195470375438049	-5.92612196254899	3.10172257521781e-09	1.23573e-08
GVIN1	26.124269063762	-0.781629	0.0974927297576018	-8.01730355213637	1.080917626162e-15	8.54876e-15
GYG2	612.663689397898	-0.722786	0.109822508119139	-6.58139811714314	4.66044814114969e-11	2.26577e-10
GYLTL1B	1.39296120462419	-1.6517	0.289693585666167	-5.701548610073	1.18723868571377e-08	4.42713e-08
GYPC	397.676347957303	-0.717933	0.0891048701014603	-8.05717068198424	7.80805911220204e-16	6.29925e-15
GYPE	2.5944550835032	-0.887219	0.156938135245149	-5.65330633833022	1.57390427625928e-08	5.79433e-08
GZMA	11.2416980580955	-2.51136	0.194452934356567	-12.915020966713	3.70343167914191e-38	3.14233e-36
GZMB	5.34428655350423	-1.06398	0.18489882681722	-5.75437448233863	8.69631900522351e-09	3.28511e-08
GZMH	5.61527645986318	-2.23051	0.195068333100947	-11.4345134638499	2.8110801140564e-30	9.72515e-29
GZMK	8.76430335776681	-2.97131	0.222330682490287	-13.3643835067091	9.76406076639854e-41	1.05607e-38
H19	208.321923473281	-2.36958	0.227474161659025	-10.4169324403381	2.07539263492845e-25	4.27344e-24
H2AFJ	202.837504830461	-0.731692	0.0709749883314819	-10.3091517064509	6.4064286898937e-25	1.24831e-23
HAAO	44.7456036953551	-0.801398	0.0874320718465208	-9.16594736150352	4.91136564821928e-20	5.95322e-19
HABP2	7.8330233344791	-1.4208	0.168804022839631	-8.41687569592859	3.86657563600883e-17	3.53031e-16
HAMP	73.0279921317936	-2.10352	0.168131220810662	-12.5112003207741	6.48370044528749e-36	4.43165e-34
HAND2	23.0990914946977	-1.78062	0.319862481599776	-5.56683105251093	2.59413687820739e-08	9.32534e-08
HAPLN1	652.436131885724	1.1024	0.130122602911037	8.4720184305767	2.41176964450317e-17	2.25431e-16
HAR1A	60.0488554978056	0.783878	0.13306797562383	5.89080739525604	3.84313269771371e-09	1.51334e-08
HAR1B	10.4523685216496	0.647262	0.145690911670313	4.44270566161945	8.88346529832207e-06	2.35802e-05
HAS2	122.276391369338	-0.642985	0.122851051525025	-5.23385995858979	1.66006245721962e-07	5.44276e-07
HAVCR2	571.71703840025	-0.998192	0.0902611082765327	-11.0589382511511	1.98432498294777e-28	5.66108e-27
HCG26	23.8437453318832	-1.01383	0.105420780475359	-9.61694640908425	6.78144413100218e-22	9.92511e-21
HCK	355.310419625882	-0.853334	0.0863193330759681	-9.88578144788047	4.79823372994214e-23	7.79317e-22
HCLS1	1017.91637773239	-1.03321	0.0910197415817384	-11.3514536050171	7.29398932429009e-30	2.39515e-28
HCN3	267.993796972819	0.621778	0.0605464196074047	10.2694357304383	9.67689951595133e-25	1.84583e-23
HCN4	54.6985872288273	0.892526	0.142708996320598	6.25416923348909	3.99637477533875e-10	1.7478e-09
HCP5	158.555853539787	-1.20465	0.0948060359281988	-12.7065129003382	5.44069491216255e-37	4.08779e-35
HCRTR1	2.7600494222633	1.80823	0.233462979112443	7.74526489696869	9.53827841931275e-15	6.84011e-14
HCST	104.053033380523	-1.03158	0.0974388027949733	-10.5869431145895	3.4259752608295e-26	7.75176e-25
HDAC4	1682.49975691661	0.794492	0.0518864055408228	15.3121438799332	6.34379205495939e-53	2.31255e-50
HDC	2.97433467694291	-2.1704	0.378687954067002	-5.73136482736753	9.96257252507645e-09	3.74262e-08
HDHD3	121.567902813637	-0.873411	0.0990254460191683	-8.82006877802016	1.14389437829497e-18	1.20581e-17
HEBP1	422.78732656066	-0.752936	0.078036928074084	-9.64845285216849	4.99029071805302e-22	7.36938e-21
HEBP2	241.920200981064	-0.585978	0.05511746579566	-10.6314479363012	2.12782922892416e-26	4.8705e-25
HECW1	270.255164848569	0.964798	0.122718016712105	7.86191319024091	3.78310189513035e-15	2.82299e-14
HELB	8.11949404127945	-0.802098	0.118273642160258	-6.78171500807474	1.1875756897166e-11	6.14872e-11
HERC5	249.254659826482	-1.04213	0.10155202433399	-10.262004943142	1.04513865479968e-24	1.98778e-23
HFE	37.4970678191875	-1.23625	0.0956402169869843	-12.9260182709848	3.21018233976111e-38	2.7595e-36
HGD	2.08483005308076	-2.48496	0.275248326700405	-9.02804787575309	1.74761375451015e-19	1.99431e-18
HGF	49.4717616569799	-1.57625	0.133943079042271	-11.7680914824473	5.69994420422654e-32	2.41818e-30
HHEX	84.0386235122735	-0.667342	0.0754754494232199	-8.84184461114415	9.41511042026503e-19	1.0002e-17
HHIP	68.214544371043	-0.76344	0.148016489863117	-5.15780531709278	2.49861212006209e-07	8.03023e-07
HILS1	9.73059166501449	-1.51672	0.286883516886702	-5.28688109822542	1.24419453451774e-07	4.13925e-07
HIP1R	5446.43980165903	0.827721	0.0838080715891315	9.87638767933581	5.26984333756095e-23	8.52398e-22
HIST1H2AG	2.67504555337622	-1.12059	0.192127203757722	-5.83254458988699	5.45884102983215e-09	2.11197e-08
HIST1H2AM	1.08264265842567	-0.906362	0.218500278418044	-4.14810409637511	3.35239970280899e-05	8.20694e-05
HIST1H2BE	1.96392694016826	-0.809137	0.118785927908754	-6.81172259661579	9.64369320734605e-12	5.04615e-11
HIST1H2BG	2.71099764676171	-0.833142	0.160846526570955	-5.1797302581618	2.2220697798569e-07	7.17779e-07
HIST1H2BH	0.628908617579212	-1.85492	0.415414727015788	-4.4652131179682	7.99890886836134e-06	2.13474e-05
HIST1H2BJ	10.679464116877	-0.989951	0.111961485108253	-8.84189089041157	9.41121051776036e-19	1.0002e-17
HIST1H2BK	177.663078271872	-0.796969	0.0758124031720976	-10.5123884858397	7.57503518189286e-26	1.63862e-24
HIST1H3E	17.6819700249006	-1.08028	0.126008177756407	-8.57311547456027	1.00722419460018e-17	9.7002e-17
HIST1H3H	2.3607600062332	-0.857452	0.172868842853243	-4.96012986891456	7.04460671689466e-07	2.14465e-06
HIST1H4H	29.012779438058	-0.863436	0.0828339661378	-10.4236922344225	1.93300137498089e-25	3.99277e-24
HJURP	90.6877704206583	-0.904966	0.150839813553463	-5.9995172712588	1.97904979968412e-09	8.04244e-09
HK2	699.833971883162	-0.622762	0.0836915684794876	-7.44115256935783	9.98105888218199e-14	6.47158e-13
HK3	35.3232559753246	-1.43685	0.13027709043568	-11.0291792281862	2.76375785403347e-28	7.70603e-27
HKDC1	107.174879403006	0.825288	0.124475661813876	6.63011559214565	3.35424096231377e-11	1.65734e-10
HLA-A	10704.1461392663	-0.696261	0.0743538931419768	-9.3641461976138	7.66676276966862e-21	9.9881e-20
HLA-B	10640.9503944072	-0.916368	0.0845723656583901	-10.8353154011967	2.34157102579044e-27	5.8569e-26
HLA-C	8253.33872776109	-0.707748	0.0781628692511887	-9.05478701035087	1.36834570070179e-19	1.57704e-18
HLA-DMA	769.961282257628	-1.35885	0.0958501423099759	-14.1768264659131	1.27482597674695e-45	2.15011e-43
HLA-DMB	770.25382497364	-1.28622	0.0994004451921374	-12.9397862480684	2.6837515085112e-38	2.34798e-36
HLA-DOA	500.639898492598	-1.81747	0.12520909301393	-14.5154444319561	9.67287211833267e-48	2.16376e-45
HLA-DOB	14.0707892193742	-1.21449	0.142087363962374	-8.5474701186141	1.25815850300341e-17	1.20403e-16
HLA-DPA1	2926.74187587668	-1.71911	0.11795141056482	-14.5747584840331	4.06557871593762e-48	9.4154e-46
HLA-DPB1	1726.89569656115	-1.65767	0.119184918171363	-13.9083918868326	5.63317711988188e-44	8.21401e-42
HLA-DPB2	2.79348127734878	-1.95051	0.210854096317792	-9.25052176515878	2.23399453984485e-20	2.79391e-19
HLA-DQA1	491.966407763663	-2.05723	0.154870257783188	-13.283539856859	2.88429939051645e-40	3.03623e-38
HLA-DQA2	121.257369591638	-2.34815	0.181435924896631	-12.9420323263141	2.60642040283935e-38	2.29051e-36
HLA-DQB1	650.350933463454	-1.66759	0.141890506146738	-11.7526572782015	6.8432479859977e-32	2.89076e-30
HLA-DQB2	22.3078964809561	-2.41197	0.198726424356961	-12.1371279663134	6.7141558145112e-34	3.50579e-32
HLA-DRA	6052.27023874314	-1.82136	0.118683617238003	-15.3463519537062	3.74671593780697e-53	1.39159e-50
HLA-DRB1	1983.47235235444	-1.73628	0.122354615620122	-14.1905357424517	1.04854605974482e-45	1.79484e-43
HLA-DRB5	734.703052879703	-1.7172	0.138955059525292	-12.3579634473196	4.41192837957973e-35	2.68052e-33
HLA-DRB6	167.080940209776	-1.85627	0.143033273025765	-12.9778595688405	1.6338287361246e-38	1.44874e-36
HLA-E	5071.65469175005	-0.666615	0.0635635366598248	-10.4873860863954	9.87217525647961e-26	2.11232e-24
HLA-F	520.213605044316	-0.829237	0.0831303698038924	-9.97514053583474	1.95824033649806e-23	3.28068e-22
HLA-G	42.4475344942879	-0.993484	0.118807392132879	-8.36213642227988	6.15925623700535e-17	5.49864e-16
HLA-H	1024.35127411061	-0.688082	0.0838430278105324	-8.20679196045466	2.27176698348051e-16	1.92674e-15
HLX	85.338870204448	-0.63742	0.0833654831321686	-7.64609145343608	2.07180342557717e-14	1.44009e-13
HMGA2	4.97236096522664	-1.79677	0.423246194727924	-4.24520722930847	2.18391490737729e-05	5.49164e-05
HMMR	59.5594096490016	-0.917082	0.128885249047669	-7.11549516701952	1.11511753972819e-12	6.43727e-12
HMOX1	940.748656321923	-1.22292	0.0930775593447897	-13.138739078932	1.97490178754842e-39	1.85124e-37
HMP19	4520.80587754983	1.05402	0.121319813922775	8.68795015802957	3.69037623812433e-18	3.71966e-17
HMSD	7.17856719327883	-1.1581	0.167724329854073	-6.90477817742075	5.02819350185383e-12	2.69921e-11
HMX1	179.797541986223	0.63497	0.124178933622864	5.11334659732284	3.16500797487871e-07	1.0044e-06
HN1L	665.035429075675	-0.661664	0.0559107757963585	-11.8342880464346	2.59536367803944e-32	1.14295e-30
HNF4G	45.6962442744816	-0.633054	0.089435469747351	-7.07833372275052	1.45898041907107e-12	8.31982e-12
HOPX	1638.68970130882	-0.843195	0.114787246356699	-7.34571721613002	2.04658663205377e-13	1.27936e-12
HORMAD2	1.46473715503174	-2.0222	0.273455572186879	-7.39498514003179	1.41424088560479e-13	9.01241e-13
HOTAIR	4.38520197335769	-4.46225	0.680938111822819	-6.55309335238844	5.63572601598372e-11	2.71444e-10
HOXA1	8.04137093782345	-2.61572	0.230870385135087	-11.3298145308578	9.34023087484231e-30	3.03403e-28
HOXA10	67.6953663039982	-2.63683	0.322030878800262	-8.18811646224091	2.65345996753154e-16	2.23219e-15
HOXA11	22.1541544748393	-1.72012	0.373583990398645	-4.6043611098648	4.13734024787786e-06	1.14839e-05
HOXA11AS	8.86983495045817	-1.56926	0.366797530394754	-4.27826622034628	1.88354669586204e-05	4.78421e-05
HOXA2	11.0927921071719	-3.10798	0.578833685110597	-5.3693908402336	7.9003038630415e-08	2.68782e-07
HOXA3	19.9845444765585	-2.72299	0.52949265764546	-5.14264079802875	2.70903274685913e-07	8.66829e-07
HOXA4	22.1635645246185	-2.27215	0.407545414784147	-5.57521667238822	2.47221965994654e-08	8.91149e-08
HOXA5	15.5681631357982	-3.07872	0.455989368712792	-6.75173140988613	1.4609114081338e-11	7.48712e-11
HOXA6	3.49285237661103	-2.55638	0.564693709882085	-4.52702439228373	5.98200375003917e-06	1.6239e-05
HOXA7	67.9870012375322	-2.23352	0.385927582720539	-5.78740949788843	7.14801760717861e-09	2.72322e-08
HOXA9	6.46767712162073	-3.49799	0.429778070069079	-8.13907078299888	3.98323065601268e-16	3.30425e-15
HOXB13	5.57158857592296	-3.78863	0.458814667752208	-8.25742506374203	1.4884859309701e-16	1.27951e-15
HOXB2	25.0533269341159	-3.17437	0.189639759843615	-16.7389426073169	6.81887240383078e-63	7.06471e-60
HOXB3	43.0267279288596	-4.78442	0.229876494345872	-20.8129917564896	3.3008893079425e-96	1.62445e-92
HOXB4	11.8052986395426	-4.27943	0.258343547580787	-16.5648652171041	1.25060048996944e-61	9.84723e-59
HOXB5	2.25995496737444	-2.00145	0.474902031911285	-4.2144575135285	2.5037927826625e-05	6.24916e-05
HOXB6	3.77231607513515	-2.17463	0.249725587761996	-8.70808890448161	3.09040883804413e-18	3.13581e-17
HOXB7	21.0785031918767	-2.36108	0.171522374017962	-13.7654322152039	4.11416356792782e-43	5.70333e-41
HOXB8	3.49920390235527	-4.89054	0.668483591606928	-7.315865677526	2.55727369891939e-13	1.58252e-12
HOXB9	0.842510867665422	-2.54154	0.507315382004678	-5.00977860636731	5.44926865425791e-07	1.6808e-06
HOXC10	20.6752661845723	-3.85816	0.493696790387751	-7.81484067458259	5.50325955794978e-15	4.0347e-14
HOXC11	3.23815866341578	-4.15277	0.624992240116755	-6.64451133012928	3.04224707263229e-11	1.50848e-10
HOXC13	3.95267936938705	-4.11939	0.664835036323107	-6.1961150262272	5.78738390882347e-10	2.48581e-09
HOXC4	40.8559919179132	-1.20944	0.162366549793343	-7.44883510550676	9.41679789008491e-14	6.12387e-13
HOXC5	5.14282350421676	-2.12093	0.381757817042534	-5.55569805832134	2.76504487181283e-08	9.89815e-08
HOXC6	7.19109001798029	-2.18536	0.410738647381109	-5.3205522659145	1.03452721821326e-07	3.47224e-07
HOXC9	4.33369842975231	-3.57018	0.499949630958462	-7.14107064217277	9.26067401275155e-13	5.39758e-12
HOXD10	18.8312160147864	-3.00247	0.383422477906714	-7.83070119121582	4.85156488950114e-15	3.57422e-14
HOXD11	10.9231422028327	-2.65728	0.586070562855498	-4.53406224316109	5.78599663182592e-06	1.57447e-05
HOXD13	12.7982948881755	-2.97504	0.541813475089991	-5.49089347659386	3.99905504567331e-08	1.40624e-07
HOXD9	34.3305057374056	-1.56117	0.31765112421827	-4.91472520323813	8.89070745176983e-07	2.67769e-06
HP	87.4893804754334	-1.10124	0.159631304569791	-6.89865032210864	5.24989186957181e-12	2.81208e-11
HPD	12.961156791594	-2.60661	0.259187191001786	-10.0568745266488	8.56751611110118e-24	1.47681e-22
HPGDS	109.691002922568	-0.694764	0.100751089109691	-6.89584884871512	5.35441041896457e-12	2.86417e-11
HPN	46.8834917859801	-0.960458	0.13970291069105	-6.87500068890942	6.19895594632281e-12	3.2998e-11
HPSE	69.5221183247021	-0.666343	0.11289449334943	-5.90235458594521	3.58349931253919e-09	1.41649e-08
HRASLS2	0.663463402892561	-1.86707	0.2274588370279	-8.20839260417414	2.24169188439435e-16	1.90206e-15
HRASLS5	63.1404641789186	-1.0396	0.133522610041678	-7.78593435393761	6.91998754566665e-15	5.02101e-14
HRH1	385.837290674086	-0.639405	0.0893959015051918	-7.15250951840688	8.52056212015105e-13	4.99337e-12
HRH3	228.430417222955	0.823238	0.150265761973314	5.47854498059056	4.28837579281955e-08	1.50208e-07
HS3ST1	322.369493385609	-0.678143	0.122817718279338	-5.52154421033738	3.36033237565529e-08	1.19101e-07
HS3ST3A1	17.542605932685	-0.858173	0.176924887650674	-4.85049581582912	1.23153231996287e-06	3.64881e-06
HS3ST3B1	7.65137661325903	-1.72514	0.235619332355838	-7.3217333909572	2.44788123787248e-13	1.52008e-12
HS6ST2	271.769592531962	0.587224	0.0929685679582817	6.31637206931557	2.67774917302634e-10	1.19392e-09
HSBP1L1	36.6114994925156	-0.615019	0.0840908419512348	-7.31374215337682	2.59803461177476e-13	1.60623e-12
HSD17B3	16.2949411760046	-1.17058	0.15055994264868	-7.77485827897568	7.55319195655395e-15	5.45031e-14
HSD3B7	181.328604280969	-0.887514	0.0697759493633209	-12.7194807128776	4.6091305567584e-37	3.5167e-35
HSF2BP	84.2550836183312	0.917057	0.0812530301710366	11.2864358925149	1.53120535230197e-29	4.86158e-28
HSF4	210.405113057026	0.740001	0.102639580886491	7.20970503077537	5.60732088390449e-13	3.35298e-12
HSH2D	5.39567336063233	-1.28976	0.139214355621025	-9.26457163720779	1.95861923796305e-20	2.46203e-19
HSPA2	2536.46946133192	-0.662347	0.107505576072413	-6.16104717631023	7.22654566017923e-10	3.07378e-09
HSPA6	171.582905129553	-1.39185	0.1481726075409	-9.39341337557075	5.80866457825318e-21	7.69472e-20
HSPA7	58.5612443964164	-2.31278	0.155760908096872	-14.8482623127711	7.13953873665763e-50	2.03684e-47
HSPB1	2704.97486323725	-1.04118	0.0957053190929738	-10.8790177245195	1.45118292618362e-27	3.72931e-26
HSPB6	806.079278275788	-1.47804	0.132839114064219	-11.1265550997301	9.31668598602295e-29	2.75788e-27
HSPB7	44.7061199188068	-1.25295	0.115285277968922	-10.8682887311554	1.63233753705569e-27	4.16225e-26
HSPG2	945.449681793835	-0.916255	0.119162596600593	-7.6891196865655	1.48150824616691e-14	1.04416e-13
HTATIP2	166.623346839781	-0.913088	0.0788197052905344	-11.5845131331408	4.93764049718161e-31	1.85491e-29
HTR1A	22.0535139683087	1.16893	0.201575624029123	5.79895283907794	6.67302939806666e-09	2.55214e-08
HTR1D	13.9398587088327	-0.795592	0.14467951488697	-5.4989943417675	3.81963390170322e-08	1.34579e-07
HTR2A	110.506162203994	0.796161	0.140700058172076	5.65857163226471	1.52638006662712e-08	5.63096e-08
HTR2B	7.31151858115218	-0.825268	0.137384550941913	-6.00699494527478	1.88993406186302e-09	7.69778e-09
HTR6	6.20937735122486	1.03022	0.203356424391469	5.06606763806706	4.06117664940621e-07	1.27097e-06
HTRA3	42.7027750666479	-1.4423	0.152699439703741	-9.44534270243697	3.54243197107656e-21	4.79593e-20
HTRA4	1.4260343682665	-1.63102	0.333275262043331	-4.89391638471289	9.88488499291319e-07	2.9617e-06
HVCN1	366.393794349822	-0.853166	0.0952157180441636	-8.96035263268213	3.23641719374354e-19	3.61161e-18
IBSP	12.8757731588098	-3.10306	0.372922397114798	-8.32092112926271	8.72823169366392e-17	7.68061e-16
ICAM1	402.661913215567	-1.07875	0.114762090911433	-9.39992403521347	5.46024787776989e-21	7.24997e-20
ICAM4	2.88786540171863	-0.84061	0.155582046718979	-5.40300371489716	6.55341019599893e-08	2.24863e-07
ICOS	1.37736321211535	-2.71415	0.303266363751847	-8.94971426907323	3.56403688211328e-19	3.95926e-18
ICOSLG	313.2405444475	-0.932808	0.0877557503282752	-10.6295966562164	2.17049138497025e-26	4.96238e-25
IDO1	5.67527285832497	-3.25367	0.345181286224374	-9.42596097108419	4.26184901605356e-21	5.7305e-20
IER3	250.719199232206	-0.647844	0.107378652718892	-6.03326569956446	1.60678897493926e-09	6.59104e-09
IFI16	1522.18954918403	-0.604331	0.0685179592689604	-8.82003417839925	1.1442478943889e-18	1.20581e-17
IFI30	686.567613006362	-1.65445	0.113792882137463	-14.5391138398254	6.84733114551047e-48	1.54931e-45
IFI44	351.318346857583	-0.848699	0.0912854075576238	-9.29720569056135	1.44185105812759e-20	1.83233e-19
IFI44L	1541.57808425893	-0.89442	0.130894916570115	-6.83311169383222	8.30922085172206e-12	4.36644e-11
IFI6	2467.48763759623	-1.05159	0.12459211313981	-8.44026190343759	3.16627397078122e-17	2.92209e-16
IFIH1	278.494174508808	-0.805014	0.0826004248632297	-9.74587889662309	1.92109215809012e-22	2.96137e-21
IFITM1	831.148933000604	-0.619714	0.108053145133492	-5.73526630965489	9.73592466217156e-09	3.66377e-08
IFITM2	636.462217818189	-0.732172	0.0763416130140472	-9.59073080265731	8.74632854484981e-22	1.26041e-20
IFITM3	2621.49681517075	-1.00635	0.0905471848067459	-11.1140461216844	1.07190009928629e-28	3.15874e-27
IFLTD1	6.79677575498514	-0.938415	0.186298866988628	-5.03714641339948	4.72523339342826e-07	1.46482e-06
IGF2	788.566278390762	-1.2971	0.121868905129044	-10.6433638935189	1.87244718093395e-26	4.32112e-25
IGF2AS	3.92140366144773	-3.18457	0.26085741235059	-12.2080788807388	2.81456621966779e-34	1.55631e-32
IGF2BP2	68.8038553177513	-2.26305	0.184512918709992	-12.2649865710242	1.39635439144954e-34	8.01377e-33
IGF2BP3	80.9564511700376	-2.13398	0.170292867070447	-12.5312529038344	5.03607388137724e-36	3.46626e-34
IGFBP2	1299.81299187799	-2.14158	0.162102757885348	-13.2112529185737	7.55562234042808e-40	7.6273e-38
IGFBP3	1380.36059623239	-0.938316	0.137312244432818	-6.83344956511076	8.28966494037687e-12	4.35733e-11
IGFBP5	7598.11990401598	-0.902442	0.102610116247306	-8.79486800386946	1.43216238550994e-18	1.4964e-17
IGFBP6	125.428426031173	-0.858446	0.13050912167741	-6.57766702640953	4.77886905943829e-11	2.31933e-10
IGFBP7	4897.38691541807	-0.775238	0.073855589027319	-10.4966727600071	8.94786043216404e-26	1.92291e-24
IGFN1	294.729175506761	1.29	0.174904381379448	7.37544732337924	1.637941539969e-13	1.03276e-12
IGJ	15.4626806033329	-2.63371	0.205770138533299	-12.7992651918781	1.65509903635034e-37	1.31373e-35
IGSF6	113.986515790069	-0.830281	0.0928436765623377	-8.94278699999619	3.79476704277246e-19	4.20135e-18
IGSF9	28.4562506910366	-0.651339	0.106587225342479	-6.11085240007315	9.9100389445706e-10	4.16036e-09
IGSF9B	260.211319376703	0.801302	0.109155335010975	7.34092877335274	2.1211667813133e-13	1.32346e-12
IKBIP	160.60953279148	-0.660223	0.0627896822526406	-10.5148354713107	7.38095200344953e-26	1.59839e-24
IKBKE	114.492457472506	-0.586992	0.0730619706395757	-8.03416995638865	9.42145242850135e-16	7.49945e-15
IKZF1	245.014733691815	-0.815526	0.0910538181925198	-8.95652236190671	3.35079512634388e-19	3.73079e-18
IKZF3	1.39553442355182	-2.02111	0.263585775552495	-7.66773590114401	1.75058863988618e-14	1.22678e-13
IL10	7.9527569365636	-1.40764	0.162171724411016	-8.67992962410677	3.96013787404531e-18	3.96921e-17
IL10RA	392.962030954204	-0.816369	0.0950114113137251	-8.59232456542736	8.52272363897055e-18	8.27267e-17
IL12RB1	35.3838447451382	-0.936482	0.100765816341901	-9.29364403271285	1.4909442365779e-20	1.88863e-19
IL13RA1	1233.9250564219	-0.847137	0.073954217212412	-11.4548870291444	2.22252840303015e-30	7.74345e-29
IL13RA2	94.3049892244136	-2.37437	0.228185673247487	-10.4054346474696	2.34184917402202e-25	4.77218e-24
IL15	11.0760560373448	-1.60416	0.131206598833565	-12.2261909383939	2.25256016281943e-34	1.27419e-32
IL15RA	41.0640630328439	-0.743182	0.0809511925146732	-9.18061600040693	4.28632339124927e-20	5.21163e-19
IL16	214.010521564573	-0.722598	0.076574940883395	-9.43647820764284	3.85519411362561e-21	5.20861e-20
IL18	194.494374003723	-1.08081	0.0974468933316298	-11.0912718883446	1.38307136111186e-28	4.02748e-27
IL1A	15.1883008914545	-1.0622	0.153783709596631	-6.90709062817896	4.94693925610569e-12	2.65776e-11
IL1R1	254.026570088906	-1.26353	0.125079207943342	-10.101873850875	5.41965509461483e-24	9.52553e-23
IL1RAP	463.049590764596	-0.80128	0.114541317953	-6.995555674949	2.64209635222e-12	1.46095e-11
IL1RAPL1	31.1886547609381	0.819258	0.0999831269798745	8.19395906792706	2.52771054939646e-16	2.13279e-15
IL1RN	21.0535025640321	-0.766762	0.167845057276032	-4.56827099468507	4.91763966628301e-06	1.35257e-05
IL20RA	51.1172769218145	-1.22011	0.161795953780703	-7.5410471828011	4.66212382554773e-14	3.12901e-13
IL22RA1	1.33794492034515	-1.64349	0.239455824065833	-6.863431427178	6.72258024097853e-12	3.56146e-11
IL27	1.11099205309549	-1.02439	0.23381932752202	-4.38110608644837	1.18078359471371e-05	3.08313e-05
IL28RA	76.0710931902564	-0.911762	0.111139260362508	-8.20377826269425	2.32947586980745e-16	1.97399e-15
IL2RA	5.32214517885498	-2.36859	0.330211485683593	-7.17295129846309	7.33979696824379e-13	4.33365e-12
IL2RB	24.8256958535776	-1.96623	0.146373174206353	-13.4329618302103	3.87593552369952e-41	4.43592e-39
IL2RG	44.1044717609793	-1.59833	0.112152236618191	-14.2514042011335	4.39357036542844e-46	7.93463e-44
IL31RA	0.795852183253954	-2.75348	0.629657292300066	-4.37297593527189	1.22564238828678e-05	3.19095e-05
IL4I1	50.1661986584953	-1.06403	0.0975619788691205	-10.9062066305999	1.07655393852487e-27	2.80688e-26
IL6	17.0246370162053	-0.836296	0.199279134740666	-4.19660396404193	2.70947115668906e-05	6.72924e-05
IL7	10.0429442227758	-0.965301	0.115997641607968	-8.32172639824434	8.66912385421311e-17	7.63201e-16
IL7R	7.35715438409179	-1.52359	0.193287841858761	-7.88251354953635	3.20860209284643e-15	2.40431e-14
IMP5	2.41321919325008	0.794374	0.128974078912993	6.15917185562235	7.31263366158894e-10	3.10838e-09
IMPA2	64.8321929052048	-0.757442	0.0742979385999128	-10.1946539253883	2.09489299663478e-24	3.83966e-23
INA	1906.35043048272	0.853743	0.135969253278911	6.27894380910886	3.40880752708199e-10	1.50151e-09
INHBC	9.93146038422325	0.659885	0.106066306209088	6.22144101139603	4.92609366022478e-10	2.13826e-09
INMT	47.4894428916963	-1.4167	0.158525936155958	-8.93673009430653	4.00855906054718e-19	4.4256e-18
INPP5D	854.829535151597	-0.798718	0.0761929175531905	-10.4828345396306	1.03591504004419e-25	2.21411e-24
INSC	5.54080611627905	0.86223	0.198759374128474	4.33805947800227	1.43746258532862e-05	3.71101e-05
INSL3	0.816934611200032	-1.25203	0.241928125085364	-5.17522398485908	2.2763772589698e-07	7.34478e-07
[truncated: 1,656 more rows]

## Sheet: DAVID_analysis
Category	Term	Count	%	PValue	Genes	List Total	Pop Hits	Pop Total	Fold Enrichment	Bonferroni	Benjamini	FDR
[truncated: 1,739 more rows]

[truncated: 1 more sheets: DAVID_analysis_UP_DOWN]
