# Supplementary material for: Transmembrane Protein TMEM230, a Target of Glioblastoma Therapy
Source: Front Cell Neurosci. 2021 Nov 17;15:703431. doi: 10.3389/fncel.2021.703431 (PMC8636015; doi:10.3389/fncel.2021.703431)
Supplement: Supplementary Table 8 — All enriched pathways identified different between high or low TMEM230 expression in GBM and astrocytes from DEG. [file Table_8.XLSX]

## Sheet: all_genes
gene_name	baseMean	log2FoldChange	lfcSE	stat	pvalue	padj
A1BG	167.942566295909	0.791742417060422	0.110446237170882	7.16857755720043	7.57809987245274e-13	2.3868412311894e-12
A1CF	0.00843443555164589	-0.086433569706186	2.90469144273556	-0.0297565408960565	0.976261218745298	0.999525589211984
A2BP1	226.79217188604	-1.27760514449873	0.202483251650152	-6.30968306804041	2.79607452456722e-10	7.43809383845482e-10
A2LD1	79.3698980350938	1.0781575941656	0.11082157162969	9.72877011497596	2.27324744211214e-22	1.30428977475855e-21
A2M	19867.6157002286	0.411383528631341	0.0931276740960189	4.41741440044112	9.98886087021437e-06	1.9363052822238e-05
A2ML1	146.908989040258	-1.05499661266141	0.183377272132996	-5.75314814311484	8.75966586682834e-09	2.10070060675976e-08
A4GALT	121.180345405046	-0.0798049249880552	0.109761274722161	-0.72707724277133	0.467178638756582	0.546946257200178
A4GNT	0.664243857697152	0.553479706844714	0.26441035649281	2.09326031773557	0.0363259229265357	0.0505680643873559
AAA1	0.152908472399913	0.069183939631635	0.713674706498926	0.0969404393929422	0.922773694031382	0.983201709871345
AAAS	777.7041604819	0.159441467994554	0.040318023804241	3.95459531371631	7.66643050646399e-05	0.000138762743999513
AACS	440.924739955193	0.0946629521557206	0.0580293903704323	1.63129323867504	0.102828459379738	0.134673389052828
AACSL	0.572279639868272	-0.439378329501665	0.337694656691749	-1.30111128735666	0.193220364741022	0.242771939642749
AADAC	0.0987886974403163	0.137179568464964	0.855329198872123	0.160382188104715	0.872580019824079	0.943001095409614
AADACL2	0	NA	NA	NA	NA	NA
AADACL3	0.0136001480145855	0.0128076310920029	2.90469144273556	0.00440929143232544	0.996481905841781	0.999525589211984
AADACL4	0.00263570629059845	-0.0250070938671827	2.90469144273556	-0.00860920836522028	0.993130930418914	0.999525589211984
AADAT	235.166593006543	-0.339196522685097	0.0569659052615081	-5.9543778182402	2.61063076057627e-09	6.49692561819334e-09
AAGAB	816.938056075964	0.489524826134545	0.0401827044908743	12.1824758272734	3.85401934158842e-34	4.55916385219698e-33
AAK1	1011.79913240985	-0.583529090301283	0.0583986107978869	-9.99217416867727	1.64924038767023e-23	1.02241497783266e-22
AAMP	2490.70528736718	-0.241235506192003	0.0293046812325461	-8.231978511477	1.84146293533345e-16	7.28750734191765e-16
AANAT	3.51087891240137	0.307820886542332	0.147307348186589	2.08965058655747	0.036649198816704	0.0509986737007572
AARS	5088.59170181953	-0.692313606581726	0.0392261614248529	-17.6492825561843	1.03057059018293e-69	8.91353159579271e-68
AARS2	436.526853871507	-0.30230433794418	0.0473648543056124	-6.38246105421589	1.74264355185016e-10	4.69466268339961e-10
AARSD1	535.26823732862	-0.354352809637158	0.0411093466864925	-8.61976261358562	6.70930582824881e-18	2.91041599060859e-17
AASDH	322.068143749756	-0.143522697323458	0.0584635462724689	-2.45490919511743	0.0140920179834707	0.0206582362945318
AASDHPPT	1458.88328320435	-0.179196888584571	0.0401852036437739	-4.45927536346664	8.22372124820357e-06	1.60550225734654e-05
AASS	1221.37656631724	-0.478440429296554	0.0704276630893027	-6.79335943164675	1.09551979558375e-11	3.19250042395619e-11
AATF	1157.60922043229	-0.41174698095923	0.0452814365956534	-9.09306355794272	9.62869296580207e-20	4.65272789232092e-19
AATK	1063.1583263331	-1.61082558865005	0.131809065759883	-12.2209013421315	2.40404365092346e-34	2.88543766258129e-33
ABAT	7364.34115573343	-0.835576581488909	0.0832016460573568	-10.0427890682942	9.88392235260658e-24	6.19158033015889e-23
ABCA1	2655.18134756955	-0.185302957354459	0.0846389866822699	-2.18933336300535	0.028572619133292	0.0403474435595073
ABCA10	5.54122078945993	-0.0427424988011849	0.14626630494103	-0.292223822967412	0.770115498098818	0.850508379396768
ABCA11P	129.034461153682	0.150747626837313	0.0654374010233962	2.30369214668865	0.0212399310008401	0.0305240809894014
ABCA12	9.38320263219191	0.261270343567857	0.181607426739027	1.43865451022169	0.150248433837483	0.192021977658792
ABCA13	47.5840460253392	1.27625037128616	0.22474621837659	5.67862890198955	1.35778692616111e-08	3.21860297919187e-08
ABCA17P	41.0531147820485	-0.706004000055638	0.104566467868788	-6.75172466322131	1.46097935847845e-11	4.22070216073761e-11
ABCA2	5515.79587821025	-1.18999743271145	0.099064293616387	-12.012374885744	3.05931235271593e-33	3.45530581876049e-32
ABCA3	3557.41446290267	-0.871503709893219	0.0612080964625072	-14.2383730300624	5.29453822897262e-46	1.25490737830937e-44
ABCA4	6.99894330415928	-0.0660108409931218	0.150984350656067	-0.437203198253905	0.661963990500602	0.744832243105778
ABCA5	192.884642294441	0.393856427512284	0.145724599999001	2.70274495531286	0.00687694915649393	0.0104093826654943
ABCA6	45.0952783422461	-0.606546462351505	0.198893520007497	-3.04960394048353	0.00229143327048383	0.00363707856519166
ABCA7	186.524424532693	-0.26359893384803	0.107827141353086	-2.44464362627272	0.0144995335453158	0.0212335364260826
ABCA8	560.884342284313	-0.347957633815342	0.126506337494944	-2.75051543428998	0.00595015884327421	0.00905239410502758
ABCA9	49.766484276752	-0.656692143223709	0.136380503043422	-4.81514680301939	1.4709171413332e-06	3.02308348380309e-06
ABCB1	528.852080874459	-0.956325049438618	0.0882760642450721	-10.8333448893198	2.39252707516635e-27	1.8561662838584e-26
ABCB10	310.599072087568	0.241793639527632	0.0380016499795534	6.36271424155867	1.9821926662716e-10	5.32545495625013e-10
ABCB11	1.26646110609863	0.0183207162367386	0.43084446130647	0.0425228078392463	0.966081930165496	0.999525589211984
ABCB4	67.9968045513784	0.276612150537637	0.1101303255971	2.51168013022673	0.0120157945938302	0.0177292532278588
ABCB5	0.778841593472163	2.31919598267191	0.422965547002194	5.48317941995376	4.17748948919447e-08	9.56573301520146e-08
ABCB6	834.742316251212	-0.0938765671582279	0.0480552218746148	-1.95351438399701	0.0507586745588776	0.0693907148908884
ABCB7	454.588736609375	0.197926252724501	0.0356127155661553	5.55774109269558	2.73288355117519e-08	6.33879835676015e-08
ABCB8	973.813791089139	0.368480649540427	0.058423830497131	6.30702654045461	2.84447069406185e-10	7.55766128899215e-10
ABCB9	249.446280657708	0.495288770993978	0.0850049754955576	5.8265856569756	5.65728364057806e-09	1.37594515777256e-08
ABCC1	556.506219183492	0.0521149286103743	0.076886664301716	0.677814925171765	0.497889046581816	0.579289161519465
ABCC10	400.702671204284	-0.287263176929754	0.0465024819541339	-6.17737301017794	6.51769613737987e-10	1.68872642003851e-09
ABCC11	12.6504846152786	-0.978985294935058	0.137144221692792	-7.13836341663759	9.4448652978211e-13	2.95357982354951e-12
ABCC12	4.76544596028956	-0.516997085455577	0.331482034999116	-1.55965340763325	0.118841808167343	0.154100503488953
ABCC13	0.629081192767342	0.216400595877654	0.418655863197817	0.516893742332241	0.605230336154337	0.688499695930979
ABCC2	6.3503901823987	-0.425046381286358	0.150910758787857	-2.81654127711244	0.00485438046674075	0.00744909989916175
ABCC3	872.642473888571	1.80882619822503	0.227307791885291	7.95760753831895	1.75397660428435e-15	6.50647453658527e-15
ABCC4	412.582873940025	-0.120139159605289	0.0664877602144841	-1.80693648301176	0.0707721833021173	0.0948567562507819
ABCC5	1037.58774694297	-0.367052319314368	0.0663928418772423	-5.52849236357488	3.22994482817807e-08	7.4531373755759e-08
ABCC6	41.8319317389301	-0.715358487037037	0.110401680087208	-6.47959783285877	9.19674193296231e-11	2.52590182337071e-10
ABCC6P1	12.2169260623013	0.389625450460606	0.145620729866422	2.67561803060601	0.00745916031563167	0.0112604027730427
ABCC6P2	24.849587777802	-0.204426721079466	0.105849591387852	-1.93129438100908	0.0534466578754705	0.0728532586786672
ABCC8	245.915000256708	-1.49562500209768	0.167894388818234	-8.90812976315054	5.19006303864321e-19	2.40084548726352e-18
ABCC9	346.607981401056	-0.793470431956634	0.12398867747637	-6.39953944268708	1.55846319066895e-10	4.21576051028694e-10
ABCD1	371.651828619408	0.403631689283238	0.063608124664257	6.34559958203026	2.21560823800926e-10	5.93638511597045e-10
ABCD2	180.354004169437	0.276251436489687	0.137339578169109	2.01144812130946	0.0442781448322128	0.0609618982744209
ABCD3	1823.13386619639	0.139870644490095	0.0438449180625771	3.19012215487476	0.0014221266885073	0.00230741634831035
ABCD4	898.795726598059	-0.0104517938438257	0.0515700301073989	-0.202671858481738	0.839391520347647	0.914644054196421
ABCE1	1299.21011989963	0.0988462122548065	0.0400641180282584	2.46720050557677	0.0136174082676565	0.0199847652778288
ABCF1	1730.67179336298	-0.251168511916676	0.0442328311807262	-5.6783277310569	1.3601792237082e-08	3.22388633311607e-08
ABCF2	1770.42734601553	0.307438024351523	0.0339072105033827	9.06703971772762	1.2229434422202e-19	5.8734643644867e-19
ABCF3	1149.55672817453	-0.233581202267064	0.0361880896238415	-6.45464307994793	1.08474250413964e-10	2.96440163270976e-10
ABCG1	671.885699310391	-0.348400429303075	0.0763230715690835	-4.5648114277964	4.99943524510684e-06	9.90448978039503e-06
ABCG2	1069.49279654584	-0.481015296036591	0.0936792808697861	-5.13470312293709	2.82589742390257e-07	6.10636611871124e-07
ABCG4	40.7595747456089	-0.649010192000229	0.148453255825737	-4.3718151440348	1.23217832467816e-05	2.37082218388655e-05
ABCG5	1.71636253854627	-0.504728062085567	0.150143576279775	-3.36163607256208	0.000774821695411234	0.00128995220206919
ABCG8	0.224878502904699	-0.556893325228679	0.586138373491386	-0.950105555982444	0.34205862039957	0.411530473691631
ABHD1	25.2506249255997	-0.287277939967524	0.107165091888609	-2.68070446173023	0.00734673679427637	0.0111000344455356
ABHD10	840.294412474734	0.0150412854907289	0.0475074536585543	0.316608959908348	0.751540336277213	0.832886109440634
ABHD11	365.165867006412	0.400806076704111	0.0653450775929382	6.13368430290802	8.58668353286183e-10	2.21085519347219e-09
ABHD12	2143.94984978939	0.00244642620354623	0.0450557916099297	0.0542977077115002	0.956697975842339	0.999525589211984
ABHD12B	12.8763711265681	-0.392987889415862	0.172067317668595	-2.28391942607466	0.0223762667309169	0.0320613223812891
ABHD13	392.113370715142	0.334931419752781	0.0457903972528972	7.31444669289454	2.58444077555572e-13	8.35905725667684e-13
ABHD14A	526.381185914576	-0.22999964605897	0.0651836166590897	-3.52848856579819	0.000417940002392177	0.000712094076997903
ABHD14B	632.296119011616	0.216030060672394	0.0646669882412586	3.34065442890942	0.000835811838588304	0.00138657436333485
ABHD15	239.341850670602	0.28970462931439	0.0596414455933932	4.85743808574758	1.18914303025258e-06	2.45986578795562e-06
ABHD2	4303.97977547524	-0.268138971884125	0.0893266646348023	-3.00177973710726	0.0026840630597225	0.00422896480806389
ABHD3	392.941681494669	0.36018839122052	0.060219255766412	5.98128267505788	2.21387290606909e-09	5.53257808993568e-09
ABHD4	1862.22967272603	0.0863818869633391	0.0531077019463762	1.62654160879641	0.103834489395143	0.135855635010099
ABHD5	762.757132812246	0.153268317038942	0.0406796012247774	3.76769467802916	0.000164762042432853	0.000290306243457457
ABHD6	795.798638909762	-0.806451571212409	0.0691609226511132	-11.6605091473491	2.02825894127154e-31	2.0262039676735e-30
ABHD8	631.430600337937	0.00120129451958046	0.0686575356783812	0.0174969070432093	0.986040200291654	0.999525589211984
ABI1	1882.05651964424	-0.791343482333597	0.054461141050565	-14.5304242083152	7.77375308618614e-48	2.06323567778722e-46
ABI2	3837.57711947838	-0.554560878487473	0.046399122457956	-11.9519691129931	6.34048930519842e-33	7.00080902007351e-32
ABI3	459.740869480123	0.184518932950439	0.0978538131806749	1.88565909649067	0.0593409082309398	0.0804263031143734
ABI3BP	573.340115436532	-1.49795307050324	0.156265814684878	-9.5859294211212	9.16289023645221e-22	5.05998867160004e-21
ABL1	2944.69901342702	-0.323424796152929	0.052993091218256	-6.10315021671183	1.0399801475523e-09	2.65997516338929e-09
ABL2	884.819195355975	-0.54074594436313	0.0556947392396563	-9.70910272218498	2.75753845100612e-22	1.57300139582993e-21
ABLIM1	4340.24240486563	-1.55123563389493	0.0736692033807125	-21.0567722020605	1.98229440154922e-98	6.6255670506018e-96
ABLIM2	203.992108515769	-0.623649752901626	0.102871567146982	-6.06241131731337	1.34095749505265e-09	3.40242946505897e-09
ABLIM3	1031.55780383767	-1.59023570297715	0.104955534346203	-15.151518334723	7.40362142353485e-52	2.4496546052367e-50
ABO	2.50363473943388	-1.09928525767558	0.188694277561921	-5.82574772207836	5.68574511594279e-09	1.38269692547036e-08
ABP1	1.34059191871088	1.09272922884881	0.261655443082193	4.17621439851171	2.96400472282033e-05	5.54713610458546e-05
ABR	5601.15457650529	-0.895633533530384	0.0596026656871217	-15.0267361904906	4.905889607687e-51	1.52834349231576e-49
ABRA	0.345525045876337	0.262164971709026	0.43698886444001	0.599935131173157	0.548549468119576	0.631488354426038
ABT1	477.083352351528	0.40033147880246	0.0410442758092873	9.75364946533848	1.77953410739703e-22	1.0278972641438e-21
ABTB1	419.047393268855	-0.204717169659418	0.0697799412421219	-2.93375382689263	0.00334889703654826	0.00522428997395236
ABTB2	236.054437249799	-0.299372328445088	0.0982406696070409	-3.04733599274686	0.00230879479419609	0.00366286672096114
ACAA1	1669.18888827056	-0.121910815848834	0.0464420028336163	-2.62501202382666	0.00866459074414621	0.0129768154837521
ACAA2	981.881635601023	0.875954390903872	0.0853118077747369	10.2676805679327	9.85454103739284e-25	6.56082205460455e-24
ACACA	1914.92608083424	-0.644564608678387	0.0534279337579939	-12.0641874641455	1.63265779863444e-33	1.86319512668236e-32
ACACB	369.255185461225	-0.494213813688314	0.100398242526002	-4.92253451110281	8.54304927923416e-07	1.78708954902405e-06
ACAD10	455.620794750648	-0.159635630726586	0.0419125864614247	-3.80877545873983	0.000139656707107403	0.000247553282171505
ACAD11	693.080037953907	-0.242880570407609	0.0627616987453996	-3.86988522080773	0.000108886604837083	0.00019469071061631
ACAD8	950.623748271514	-0.070057126650302	0.0384649989748056	-1.82132142252725	0.0685580118658747	0.0920705525738932
ACAD9	770.715909216204	-0.0257310094080822	0.0294924743938298	-0.872460176263321	0.382957384418211	0.456695671306671
ACADL	34.6377866884592	0.456986832388988	0.187193610289991	2.44125230386361	0.0146364250757464	0.0214133320345515
ACADM	1216.38926926465	-0.0471448982724306	0.0415016495798046	-1.13597649129041	0.255966403213234	0.315320931494563
ACADS	316.986800726087	0.458138489413453	0.0816642956633299	5.61002192809181	2.02300980040814e-08	4.73628793352114e-08
ACADSB	529.817674029032	-0.903596795485696	0.0595092786999364	-15.1841328818973	4.50480926213074e-52	1.51337033473966e-50
ACADVL	4010.48961515979	-0.144729796654154	0.0519234665482308	-2.787367760196	0.005313813702687	0.00812628198658299
ACAN	178.514649508524	0.474175940792387	0.224262426141442	2.11437978689005	0.0344828426512234	0.048138302214507
ACAP1	32.4565519786541	0.662570601201683	0.150682079606648	4.39714266574569	1.09685253545073e-05	2.11912726551272e-05
ACAP2	1000.752992644	-0.279075816327442	0.0459396287796947	-6.07483829844949	1.2411272205871e-09	3.15888342668787e-09
ACAP3	2717.73727988464	-0.591240313940329	0.0940775017099229	-6.28460899996421	3.28679860245049e-10	8.69308857836959e-10
ACAT1	1477.20641737068	-0.254707836068294	0.0448771770491992	-5.67566528948682	1.38150672779195e-08	3.27246999063751e-08
ACAT2	716.237558072575	0.166767112661818	0.0691105535878995	2.41304842754171	0.0158197174757132	0.0230419402187063
ACBD3	929.234156989113	0.140958216197657	0.0403267824713289	3.49539952258463	0.000473352636120492	0.000802761780555221
ACBD4	298.035182050626	-0.477839946403357	0.0684315690318137	-6.98274134531696	2.89475079429119e-12	8.75260436421684e-12
ACBD5	1629.87384491924	-1.06056059601215	0.0539719259712479	-19.6502269823971	5.7554906269474e-86	1.15814566493268e-83
ACBD6	554.883787261673	0.391164551088397	0.0378883145958732	10.3241475705811	5.48034166070036e-25	3.69730884533052e-24
ACBD7	630.056754362789	-1.67633231586601	0.147003005687024	-11.4033880329971	4.02157667957723e-30	3.71454295649943e-29
ACCN1	55.9255218251798	-1.33614547304332	0.219330430243446	-6.09192929389808	1.11557958893083e-09	2.84853418279372e-09
ACCN2	1939.37143217189	-0.847820113221031	0.100161670123321	-8.46451653788501	2.57217423137868e-17	1.07124130607788e-16
ACCN3	124.187676945316	-0.828374789705898	0.125311062852782	-6.6105479504159	3.82900064132628e-11	1.07868418067078e-10
ACCN4	1119.94659070274	-0.712331411218921	0.172521527385866	-4.12894217905748	3.64436028067297e-05	6.76711720667334e-05
ACCN5	0.0266951301812065	0.132380261655038	2.32367439489341	0.056970228680043	0.954568910682265	0.999525589211984
ACCS	130.234114596656	0.5972991905317	0.119864720745223	4.98311085045015	6.25700808341645e-07	1.3212142563976e-06
ACCSL	0.0191339596489693	-0.0807509393296772	2.6435776588394	-0.0305460817690254	0.975631542573841	0.999525589211984
ACD	522.502861273811	-0.161977533640716	0.0457995495254916	-3.53666215757342	0.000405217656341796	0.000691253649053652
ACE	382.424070204093	1.3546252573942	0.130495371667461	10.3806383328764	3.03737441874516e-25	2.08120304161413e-24
ACE2	3.21768790870482	-0.312929839699152	0.178354276277362	-1.75454071654839	0.0793378995073033	0.105569728629151
ACER1	0.12764627209079	0.329539148551426	0.66894168592669	0.4926276168526	0.622275730761324	0.705651374963387
ACER2	25.2089825850418	0.309098797676902	0.0910182518792007	3.3960089465038	0.000683761246293963	0.00114463257868565
ACER3	588.61066082398	-0.0354516328912386	0.0500566601345055	-0.708230089582041	0.478802383367577	0.55942546510301
ACHE	362.366972886871	-0.0610955756307871	0.110676018841207	-0.552021804456521	0.580933414423228	0.663808490695681
ACIN1	2630.53748514192	-0.444134245159243	0.0471352730637733	-9.42254528913699	4.40283238375158e-21	2.31592036830038e-20
ACLY	3917.8449868472	0.138544649173827	0.0471884945132236	2.93598366726878	0.00332491828166625	0.00518852484881368
ACMSD	2.35591385625114	2.47811278227254	0.447769027849824	5.53435505392674	3.12375628143031e-08	7.21148137085059e-08
ACN9	340.94999871003	1.22145324983819	0.0880274607205526	13.8758205659908	8.87713396974465e-44	1.87226825543705e-42
ACO1	998.024007731788	-0.16058570760122	0.0451478018416852	-3.55688873102457	0.000375273010564377	0.000641392248945182
ACO2	4945.18341107778	-0.751173237907776	0.0557328831022607	-13.4780975986743	2.10463701722576e-41	3.90069943418157e-40
ACOT1	310.336978771956	-0.605702971420902	0.0783244389093329	-7.73325643764974	1.04829831235579e-14	3.70075952732835e-14
ACOT11	104.916472542478	0.570238934315958	0.122437865556556	4.65737402170375	3.20268280702422e-06	6.43211171753922e-06
ACOT12	2.50335195673285	1.10406110636133	0.353997451825168	3.1188391347704	0.00181565059982592	0.0029154490537063
ACOT13	710.70999768408	0.0833168854947741	0.0462882472490536	1.7999576662838	0.0718673229877291	0.0961685858299891
ACOT2	207.904904438457	-0.142268724231885	0.070924085657157	-2.00592962057493	0.0448637574472377	0.0617256189813386
ACOT4	24.722190650736	0.582882458209324	0.122552313439551	4.75619302361708	1.97277851312027e-06	4.02682872153315e-06
ACOT6	3.18342860095822	0.335070362775675	0.158396921337225	2.11538431395592	0.0343972056130696	0.0480221518364413
ACOT7	926.036191756832	-0.0969730373785969	0.0809695349513733	-1.19764844193356	0.231053908958777	0.286637083836631
ACOT8	542.018535141257	0.135819374820727	0.0438648956119172	3.09631136529658	0.00195944489241705	0.00313231625149678
ACOT9	443.227381218552	0.773948264810179	0.0617941105990546	12.5246282745596	5.47472476861848e-36	7.309517429733e-35
ACOX1	1965.12430815133	-0.368494711000385	0.0398232220499163	-9.25326209261761	2.17743678821844e-20	1.09594317160969e-19
ACOX2	181.388228115552	0.270465863262804	0.103550070418564	2.61193316595094	0.00900318527759161	0.0134696012194907
ACOX3	405.429256173691	-0.208883838852045	0.0372999683651594	-5.60010766784338	2.14218711411136e-08	5.00698469719996e-08
ACOXL	1.20814096952834	-0.196705560812774	0.172378702476936	-1.14112450080133	0.253818116824717	0.312850382135348
ACP1	1333.87477206068	0.44271080215143	0.0345562977664424	12.811291450942	1.41755450808636e-37	2.07067962218245e-36
ACP2	1235.27463753661	0.387201084536367	0.0410497406694489	9.43248552175483	4.0048433587109e-21	2.11390554158937e-20
ACP5	113.813610143441	1.06977784259256	0.166412467800962	6.42847171686722	1.28893228676392e-10	3.505412314851e-10
ACP6	236.057472837401	0.476489674694278	0.075209900193552	6.33546479210896	2.36626847132256e-10	6.32544587969106e-10
ACPL2	1252.31573932279	0.090891980238369	0.0800451075275093	1.13550950265301	0.256161902650058	0.315542052611602
ACPP	23.2351320055547	1.24974940410197	0.171025767166483	7.30737493424262	2.72411669528234e-13	8.79783511807528e-13
ACPT	0.0636331359149458	-0.250823553321037	1.10153382130189	-0.227703905654563	0.819876435924774	0.897073923122485
ACR	2.39672006349894	-0.858760658966112	0.141818835391964	-6.05533571469994	1.40125118462071e-09	3.5499323433608e-09
ACRBP	28.1903137722717	0.202009416519992	0.0969250948764285	2.08418074573502	0.0371437294643363	0.0516445283111269
ACRC	45.0521265511648	-0.342768755665655	0.0798125900917304	-4.29467024277377	1.74953185792464e-05	3.32794137535198e-05
ACRV1	8.54336261962678	0.436082674195726	0.199409262428804	2.18687271034576	0.0287518176200216	0.0405830537160423
ACSBG1	979.441137938696	-0.628097836410879	0.120239919688576	-5.22370472333701	1.75378366082346e-07	3.84786535285254e-07
ACSBG2	2.98457663954287	-1.06584630440001	0.195341859519574	-5.45631288153682	4.86123038892617e-08	1.10747993610933e-07
ACSF2	374.501495036211	-0.150081349170858	0.0830790694282344	-1.80648808663537	0.070842133367529	0.0949440580404833
ACSF3	371.284887902121	-0.346110294601118	0.0386829659941028	-8.94735669063956	3.64096220473648e-19	1.70101337781103e-18
ACSL1	1180.2798740211	0.233383266758795	0.101106871545888	2.30828294052075	0.0209834046480045	0.0301752161932947
ACSL3	2579.8196663331	-0.0197199996094863	0.0724958733428755	-0.272015477573721	0.78561011853264	0.864764616353916
ACSL4	950.192133086843	-0.0429775367959118	0.0628093937946694	-0.684253328991041	0.493815212318729	0.575058225281996
ACSL5	226.289010574084	-0.0342319796368981	0.0736707536892634	-0.464661726976291	0.642173720610966	0.725628338898021
ACSL6	425.177363414478	-1.12974573502128	0.114943853027251	-9.8286746552113	8.47264233934144e-23	5.02044792463381e-22
ACSM1	0.569903556350369	-1.36324178625759	0.307160449021268	-4.43820742742566	9.07111796612201e-06	1.76412668926949e-05
ACSM2A	0.144502152304749	-0.789464277957303	1.43745528604326	-0.549209624551442	0.5828616001729	0.665741717660561
ACSM2B	0.0431660362276153	-0.262191212775578	2.90469144273556	-0.0902647382500131	0.928076840529778	0.987518226690079
ACSM3	2.38743744840866	0.506409336221672	0.182185774587708	2.77963160058842	0.00544205978131411	0.0083120919283955
ACSM4	0.00789514606077154	-0.0221664990513097	2.90469144273556	-0.00763127495236946	0.993911182634744	0.999525589211984
ACSM5	220.149857503192	-1.2692811428205	0.127707143439964	-9.93899877979182	2.81643597005927e-23	1.72164033879631e-22
ACSS1	1379.7604266717	-0.877422922370314	0.0824213026807914	-10.6455842583376	1.8283365210913e-26	1.34784284844562e-25
ACSS2	651.349274269491	0.135900982953878	0.0430836842730827	3.15434915204744	0.0016085651236806	0.00259560627108923
ACSS3	435.525116186028	0.867696072429634	0.147922573155167	5.8658800609116	4.46756663141646e-09	1.09509526378537e-08
ACTA1	6.67383006741123	-0.482993362027705	0.14928717221668	-3.23533063729464	0.00121501943006799	0.0019842801789599
ACTA2	1505.94961581941	1.37634784063666	0.13806744182915	9.9686633025316	2.0902291771324e-23	1.28649561089422e-22
ACTB	107867.158773401	0.616107869591446	0.0471924063138077	13.0552331977864	5.93280877235735e-39	9.58975319597434e-38
ACTBL2	0.120360563235319	0.726947438857192	1.6090716650377	0.45178064759481	0.651427012585649	0.734526884795529
ACTC1	48.3848498949103	-0.118016707359952	0.214809027810324	-0.549402921110747	0.582728969875097	0.665628781622852
ACTG1	56958.0526609524	0.486390076793305	0.0435123038017159	11.1782193608908	5.21253457696638e-29	4.48478105836724e-28
ACTG2	102.72136284307	2.49044895277129	0.208188775254845	11.9624554672687	5.58845715592415e-33	6.20170934804863e-32
ACTL6A	812.954551789303	0.883458326789408	0.0568984373820615	15.5269347883346	2.28021496073026e-54	8.63067927554716e-53
ACTL6B	215.074064320419	-0.762535936554881	0.198268763605174	-3.84597110855732	0.000120075912106294	0.000214056860128017
ACTL7A	0	NA	NA	NA	NA	NA
ACTL7B	0.0758658328546138	0.254352245266531	1.01672174458485	0.250168983422684	0.80245667039146	0.880897658657292
ACTL8	1.0213708125837	-0.11291728352785	0.300861733817476	-0.375312879092671	0.707427788939864	0.78985822658216
ACTL9	0	NA	NA	NA	NA	NA
ACTN1	3995.37683507437	1.06499625254691	0.124429910021874	8.55900524527983	1.1384553806666e-17	4.85202941576516e-17
ACTN2	640.676622124035	-0.73575924911347	0.0960667660921669	-7.65883227928771	1.87631241461399e-14	6.5039340510086e-14
ACTN3	0.58318096397375	-0.382227501654992	0.306188475895294	-1.24834058674926	0.211906356805154	0.264380194622146
ACTN4	5435.74363711958	0.342779436123115	0.055918369476187	6.1299969819236	8.78807400141398e-10	2.2609369772718e-09
ACTR10	1065.47086134488	0.120512828118232	0.045854444774659	2.62816022984171	0.00858480683908616	0.0128710097214916
ACTR1A	3204.6321805006	-0.505580761008135	0.0441267906580267	-11.457455968785	2.15759528630244e-30	2.0318901168044e-29
ACTR1B	1476.00621421244	0.150768409605409	0.0371173361809559	4.06194046012292	4.86664909492727e-05	8.94911601566261e-05
ACTR2	4713.92359634287	-0.0379866207128274	0.0381827784462757	-0.994862664755415	0.319803063440256	0.386831651293741
ACTR3	3151.15419695725	0.644247008110648	0.0445965166762298	14.4461284451401	2.65178327815476e-47	6.74750532196282e-46
ACTR3B	371.411387630431	0.0616580969639727	0.0685372154356178	0.899629443245951	0.368317482948768	0.440569013936049
ACTR3C	8.63036880415578	0.703393420668362	0.141908207337066	4.95667892553696	7.17083304557569e-07	1.50900467035271e-06
ACTR5	204.516772410876	0.14909153543321	0.0403842934881735	3.69181982784646	0.000222655178049111	0.000387602410940014
ACTR6	650.39194901114	-0.116249383580269	0.0373535309689803	-3.112139082027	0.00185736971482757	0.00297807389026748
ACTR8	540.679724829872	-0.0174063313284468	0.0344023327628349	-0.505963692882215	0.612882137815829	0.696280433098753
ACTRT1	0.0141078336541908	-0.0193259042354359	2.90469144273556	-0.00665334153951835	0.994691440673524	0.999525589211984
ACTRT2	0	NA	NA	NA	NA	NA
ACVR1	702.133339750542	0.106598704217753	0.051617398882787	2.06517001098444	0.0389069169590277	0.0539477149790484
ACVR1B	972.606902225651	-0.272616425808081	0.0459903647934363	-5.92768565834444	3.07233900473036e-09	7.61137250920637e-09
ACVR1C	55.4224506055842	-1.32551204640483	0.174706794570453	-7.58706637405736	3.27229486628903e-14	1.11817111008871e-13
ACVR2A	312.612676436517	-0.120193801787674	0.0499129506931669	-2.40806844954027	0.0160371738773845	0.0233328219611939
ACVR2B	468.803500204748	-1.28193422967934	0.0840980271945092	-15.2433329585053	1.82327272236051e-52	6.23135842026852e-51
ACVRL1	412.159797301861	0.643919495801211	0.0841517509224938	7.65188470521879	1.98054778531481e-14	6.85560862320663e-14
ACY1	444.978493144118	0.188818399423437	0.0567777778362833	3.3255686752639	0.00088238359677411	0.00146137604168854
ACY3	126.361922220795	-1.79471534875154	0.165322707622068	-10.8558308448124	1.87097487287645e-27	1.46005637091902e-26
ACYP1	101.219386164359	0.145421592071511	0.0757704149115244	1.91923974867126	0.0549539992384797	0.0748096689895637
ACYP2	597.410896051392	0.228942273246845	0.0717460774869023	3.19100752635068	0.00141777586886941	0.00230054637818685
ADA	133.532370371697	0.636421369566728	0.0924662990038875	6.88273864556828	5.87126890068108e-12	1.74056614289249e-11
ADAD1	0	NA	NA	NA	NA	NA
ADAD2	24.490443764466	-1.08317636885219	0.21638252859269	-5.00584023995355	5.56188741002277e-07	1.17796605870099e-06
ADAL	237.842890242012	-0.0560258816531379	0.0456935221863644	-1.226123068925	0.220152365871761	0.274061274855826
ADAM10	1099.11969396298	0.0492053794064045	0.0637035013161589	0.772412479530747	0.439870164871024	0.518050624179204
ADAM11	190.402035249321	-0.964235387808265	0.142445395266849	-6.76915800613926	1.29534017838412e-11	3.75482997467807e-11
ADAM12	446.007020928019	2.18624164428159	0.178043635068874	12.2792462838443	1.17083943778861e-34	1.43856409427984e-33
ADAM15	1363.87608941331	0.164466956720004	0.052374560855894	3.14020688731934	0.00168828560100439	0.00271912708688391
ADAM17	868.538685282454	0.162347155070252	0.0544536440960517	2.98138274793667	0.0028694990690101	0.00450852694134962
ADAM18	0	NA	NA	NA	NA	NA
ADAM19	447.460649081311	1.31166060646447	0.137491369061714	9.53994869216643	1.42902997400576e-21	7.78251065655719e-21
ADAM2	0	NA	NA	NA	NA	NA
ADAM20	1.70579220178083	-0.32694516267577	0.143775278497614	-2.27400124758719	0.0229659115126882	0.0328441348197993
ADAM21	9.3012498845832	0.587815202907335	0.0929681709390288	6.32275753056217	2.56936307620524e-10	6.84885642913859e-10
ADAM21P1	1.47186230345058	0.212301383537128	0.15862319487479	1.33840062737804	0.18076587450655	0.227995078047276
ADAM22	383.404802597199	-1.11418263787112	0.10214006921435	-10.9083795070953	1.05113333050735e-27	8.34474608599231e-27
ADAM23	473.241174363081	0.111852027344182	0.0910894898425326	1.2279355997881	0.219471144285151	0.273299505260368
ADAM28	285.035624063546	-0.237310262506049	0.104121052755353	-2.27917655676843	0.0226565720798541	0.0324393815011053
ADAM29	2.50717549911273	-1.510301931536	0.312977467083816	-4.8255931828202	1.39587180899533e-06	2.87273972796784e-06
ADAM30	0.0201484952955877	-0.145019450729317	2.90469144273556	-0.0499259400140423	0.960181405933838	0.999525589211984
ADAM32	8.7102121236287	0.174435455932582	0.155351588502956	1.12284307880935	0.261504145845362	0.321460027183053
ADAM33	217.883403678987	1.57146973046697	0.182431900583167	8.61400733886767	7.05501740856716e-18	3.05634761197154e-17
ADAM3A	0	NA	NA	NA	NA	NA
ADAM5P	0.016268091789385	-0.098239445146096	2.90469144273556	-0.0338209572627022	0.973019924025348	0.999525589211984
ADAM6	480.269350994484	1.59856771862673	0.265340229306958	6.02459613004041	1.69532418550117e-09	4.26534740215401e-09
ADAM7	0.00553095540992573	-0.00752002879552637	2.90469144273556	-0.00258892517287283	0.997934338883018	0.999525589211984
ADAM8	153.617208416391	1.88889170731756	0.138473288172317	13.6408381157744	2.28914484713065e-42	4.46949865202142e-41
ADAM9	3313.23775015738	0.694635149371026	0.0787029410262427	8.82603801475993	1.08449178633973e-18	4.93109938358762e-18
ADAMDEC1	52.0333956926328	2.40852362874662	0.275572911329659	8.74005945332334	2.32987783426613e-18	1.03901381482877e-17
ADAMTS1	675.668507382773	1.18969573685163	0.127640725051378	9.32065950246484	1.15619373515874e-20	5.92673263772559e-20
ADAMTS10	357.340972267339	-0.279154612058276	0.0806356492455638	-3.46192552140495	0.000536325550973667	0.000905043630429635
ADAMTS12	42.664334780788	0.504232677741347	0.157592970778126	3.19958863172426	0.00137623864387103	0.00223572172807782
ADAMTS13	200.690545439964	-0.948079838458986	0.0954663605147096	-9.93103574230112	3.0507003832385e-23	1.86253286555613e-22
ADAMTS14	144.650753309713	1.05510716886761	0.185698044866938	5.68184317515914	1.33250819489674e-08	3.15943989459705e-08
ADAMTS15	89.3087042549192	-0.483904168406944	0.17939978215416	-2.6973509253825	0.00698935713133959	0.0105746603214682
ADAMTS16	22.2532704457829	-0.651784318709922	0.209756511886454	-3.10733770717329	0.00188780608005427	0.00302441594757253
ADAMTS17	60.3611817737384	-0.678009391241539	0.131673731316576	-5.14916213326892	2.61652636381409e-07	5.66511856548241e-07
ADAMTS18	36.6094576194583	0.821376737700046	0.232967452556701	3.52571455233703	0.000422341919115502	0.000719159195661661
ADAMTS19	19.2850448626934	-1.77037365343578	0.218204992826622	-8.11335080147527	4.92426466212522e-16	1.89439132144185e-15
ADAMTS2	52.2858784802039	1.57281399771164	0.164498447999077	9.56126952468557	1.16320949846854e-21	6.37711740611611e-21
ADAMTS20	24.4829651919282	-4.01455928728549	0.3294608880134	-12.1852378638711	3.72564723029236e-34	4.40994978279503e-33
ADAMTS3	126.999078006305	1.52971494444489	0.200522255393361	7.62865419324189	2.37216999606277e-14	8.17103796023718e-14
ADAMTS4	559.44059093467	0.289598339642053	0.135295018546133	2.1404952137488	0.0323147671921063	0.0453169683564455
ADAMTS5	131.40744136182	-0.154595423189899	0.10664001371468	-1.44969432959308	0.147143777706762	0.188310422245269
ADAMTS6	154.549866980981	-0.397008689571223	0.104542551180466	-3.79757988578152	0.000146115693931625	0.000258491206991266
ADAMTS7	135.673056861148	0.879129259104702	0.151271886734192	5.81158388438339	6.18845102488407e-09	1.50087632776674e-08
ADAMTS8	132.775856643178	-0.845632155175973	0.133703735884063	-6.32467110649203	2.53772511064838e-10	6.767266961729e-10
ADAMTS9	655.027111361299	0.689370432796446	0.112759401672352	6.1136403933711	9.73836183631153e-10	2.49792527851279e-09
ADAMTSL1	123.905794137458	0.354049758552351	0.182144398259024	1.9437861495409	0.0519212446760977	0.0708915699655644
ADAMTSL2	412.940149835171	-0.728915459836828	0.0809328949366299	-9.00641772925046	2.12897031437952e-19	1.00872884669784e-18
ADAMTSL3	79.3025406692896	-1.83549875583297	0.159653038352973	-11.4967981490895	1.36900116883818e-30	1.30418855311541e-29
ADAMTSL4	165.981490927568	1.22262283794199	0.132392514554576	9.23483357088133	2.5868785358388e-20	1.29442387025479e-19
ADAMTSL5	7.17107622005436	-0.00657121371088537	0.182238198499918	-0.0360583772500821	0.971235810870864	0.999525589211984
ADAP1	535.758629451545	-1.15802144278064	0.121786910501261	-9.50858707240672	1.9326966631958e-21	1.0419020830569e-20
ADAP2	442.484129474977	0.426524856574497	0.0860964958067734	4.95403271152577	7.26909780576426e-07	1.52903049311649e-06
ADAR	6595.95409551013	-0.210247394465847	0.045043599483217	-4.66764194864541	3.04676248820026e-06	6.12770589161746e-06
ADARB1	356.276960357163	-0.505376451292924	0.0835842792169647	-6.04630985667877	1.48200948468156e-09	3.74634367874892e-09
ADARB2	114.482046947159	-2.55177268421557	0.172999478789553	-14.7501755616253	3.06865407386206e-49	8.73215849012408e-48
ADAT1	220.607522021432	0.144435421915701	0.0631851693612139	2.285907015458	0.0222596989461639	0.0319082113264775
ADAT2	111.104791825055	0.0645660163642334	0.0713016895200952	0.905532769262594	0.365183207673347	0.437138087611898
ADAT3	45.5104713820317	0.637957609590356	0.0981165127076198	6.50204121595133	7.92373821167232e-11	2.18540024523326e-10
ADC	487.9887635373	-0.622837994813311	0.0658116995808176	-9.463940283877	2.96552690205163e-21	1.57756111433661e-20
ADCK1	275.187584292603	-0.368022577095375	0.0493870274462386	-7.45180660034651	9.20706290954767e-14	3.06280837679285e-13
ADCK2	943.183105864557	0.471159352589367	0.051137101634986	9.21364992393346	3.15219959613336e-20	1.57211370854198e-19
ADCK4	928.617939111727	0.0487103386475832	0.0490191312279236	0.993700570112012	0.320368665107396	0.387468265925657
ADCK5	112.5925031803	-0.158981468740003	0.0679781952796795	-2.33871270171137	0.0193503073487001	0.0279163114285147
ADCY1	849.543708623473	-0.867263083686434	0.142850618483112	-6.07111885755651	1.27022128327367e-09	3.22876562337674e-09
ADCY10	1.59859294063593	0.21578052238729	0.190365900676959	1.1335040656964	0.25700263480335	0.316419551621531
ADCY2	2915.85877993242	-1.35162294920991	0.119538380300241	-11.3070207728687	1.21132976592083e-29	1.07795230072016e-28
ADCY3	968.625638059475	0.119204506494983	0.0476622986913959	2.50102302591004	0.0123835126696048	0.0182499715899116
ADCY4	83.6452673465394	-0.00795903340023883	0.0978845975933451	-0.0813103756456567	0.935195122741933	0.992067399938749
ADCY5	292.766665841766	-1.19643578817958	0.120193984417164	-9.954206892976	2.41742678142294e-23	1.48325003514811e-22
ADCY6	1035.57646556986	0.161761648807456	0.0543508349118908	2.97624956580135	0.00291797296802257	0.00458176820840872
ADCY7	766.031761072844	-0.563537984106485	0.0690550919878788	-8.16070137456919	3.33084740154925e-16	1.29478239224426e-15
ADCY8	1085.32606372043	-1.25479883294947	0.126586663542155	-9.91256738930959	3.6708964453446e-23	2.22875855610208e-22
ADCY9	560.314448222144	-0.192937350619888	0.0615327433697605	-3.13552330115521	0.00171547799842922	0.00276089334277518
ADCYAP1	30.803705343155	0.675404426329813	0.180291687831689	3.7461761795715	0.000179550514823625	0.000315236480797889
ADCYAP1R1	1335.55116106856	-1.64114773547204	0.144130435482815	-11.3865453189984	4.87954679899135e-30	4.47764834230384e-29
ADD1	8471.34987305913	-0.549929544388783	0.032317705368957	-17.0163549085704	6.21194053202402e-65	4.1666485473304e-63
ADD2	861.854436366133	-0.413755025836635	0.0916939223082514	-4.51234951478787	6.41134216749016e-06	1.26191902927344e-05
ADD3	4687.94934164805	-1.11582552922958	0.0805033283456489	-13.8606136188392	1.09732162065044e-43	2.3044922640284e-42
ADH1A	0.0500036706630982	-0.273992566173752	1.47186675823456	-0.186153104308432	0.852324698419394	0.925643961495234
ADH1B	14.7060633247549	-1.46118992052546	0.2388454498761	-6.1177214022015	9.49228283296682e-10	2.43543868678253e-09
ADH1C	0.205875548685482	-0.401905208945126	0.594135296277146	-0.676454018913647	0.498752430262764	0.580191005473201
ADH4	0.837964176739221	0.960970187564081	0.497155512098245	1.93293680584634	0.0532439830986922	0.072592045541082
ADH5	2825.94369440502	0.392827210162246	0.0409851916877218	9.58461322214405	9.28047060862341e-22	5.11632318708565e-21
ADH6	0.275237665442792	0.0995427418841124	0.498258151267176	0.199781461940872	0.841651500278396	0.916323501655715
ADH7	0.539205136090534	1.01221836826016	0.418269705997521	2.42001357914781	0.015519927533186	0.0226286854679799
ADHFE1	362.842127289208	-1.44433444872771	0.0997179141078818	-14.4842023787735	1.52482410960837e-47	3.94096087044261e-46
ADI1	1547.71431954479	0.393507596922543	0.0608307315217864	6.46889470302703	9.87223561126081e-11	2.70427123564472e-10
ADIG	3.90629592985629	0.344148903735798	0.243314874762755	1.41441785699029	0.157239250068207	0.200242687203426
ADIPOQ	0.333644398207485	-0.868319413688038	0.600949407060149	-1.44491267232606	0.148482416368234	0.18988801885743
ADIPOR1	2033.63826964105	0.392075400272585	0.0556161445669693	7.04966882054317	1.79344125006655e-12	5.51140119235037e-12
ADIPOR2	2686.69491348864	-0.838096786361116	0.0606680558457345	-13.8144658614446	2.08494976311318e-43	4.32336585999915e-42
ADK	443.850395614908	0.172365459636617	0.0586782706863918	2.93746658891552	0.00330905825950649	0.00516622823826047
ADM	647.567781281522	3.05844454899137	0.161378511382593	18.9519938112483	4.25165032336082e-80	6.76149551424802e-78
ADM2	24.3644699403247	1.11073728769589	0.199101057683193	5.57876136179692	2.42237295250286e-08	5.63914468461296e-08
ADNP	2298.70382279967	-0.0356891311779235	0.0417688820670667	-0.854443054535644	0.39285954894665	0.4675149541505
ADNP2	669.54217424247	0.0802140238206052	0.0481074907197325	1.66739155629465	0.0954365717504966	0.125567733848398
ADO	930.870699507954	-0.423567845889192	0.0449465197456548	-9.42381853558619	4.34974747136718e-21	2.28982968861081e-20
ADORA1	1650.25027926242	0.436595753645594	0.11802889692563	3.69905815455255	0.000216401017385931	0.000377247883915361
ADORA2A	107.016824544014	-0.358851863379483	0.0731591685497305	-4.90508394905487	9.33873894205993e-07	1.94816388381913e-06
ADORA2B	109.959448079881	1.07611278594269	0.111241477433239	9.67366499234525	3.90150224026885e-22	2.20894700482635e-21
ADORA3	1289.41695852624	0.425436528489856	0.104219104906073	4.08213569741631	4.46237276837369e-05	8.23334496559967e-05
ADPGK	866.345176542063	0.675155325462087	0.0460675365535692	14.6557722850448	1.23741622257553e-48	3.42241906159741e-47
ADPRH	223.599287466203	0.797659707568702	0.0805841596974513	9.89846777038404	4.22701340168661e-23	2.55538639734089e-22
ADPRHL1	44.2951685058756	-0.340278842823464	0.0947768679922881	-3.59031533782222	0.000330278150235523	0.000566897477817435
ADPRHL2	891.558155482396	0.250213918834992	0.0431803639871306	5.79462273429575	6.84749321610977e-09	1.6556224401874e-08
ADRA1A	38.8948453882774	-1.2220105029677	0.163129709304154	-7.49103586452954	6.83321402850105e-14	2.29441479043148e-13
ADRA1B	66.3672794766819	-0.526895435413367	0.144979299612198	-3.63428045812573	0.000278757506550182	0.000481523418908021
ADRA1D	61.3908471300503	0.825800761718303	0.170116689470714	4.85431949262371	1.20800845608856e-06	2.49758091361569e-06
ADRA2A	104.312672029428	-0.94335032688894	0.168992892092124	-5.58218937619393	2.37509553840147e-08	5.53300460924712e-08
ADRA2B	20.3184077043347	-0.242888466968886	0.148167030167712	-1.63928821880251	0.101153248454082	0.132593861972513
ADRA2C	30.972167508247	-1.26204691538623	0.148757434165969	-8.48392500490539	2.17722115632334e-17	9.0963561870119e-17
ADRB1	70.236381998476	-0.3507822211989	0.120069325021915	-2.9214974027286	0.00348353180111167	0.00542316626809206
ADRB2	89.9353464275405	-1.05190369291151	0.103495420107519	-10.1637704530182	2.87729308406434e-24	1.85729033118654e-23
ADRB3	0.810820253478963	0.395968287848292	0.345885984475497	1.14479425481417	0.252294395804438	0.311108397027484
ADRBK1	1835.61762513208	-0.246304243051391	0.0440332416672535	-5.59359778488808	2.22411866831092e-08	5.19233102155692e-08
ADRBK2	540.285293466902	-1.05876948963162	0.0732816260833278	-14.4479530029493	2.58247380113954e-47	6.58814791183335e-46
ADRM1	1673.08157707007	0.166533301874357	0.0388722093800204	4.28412237252336	1.83461920936469e-05	3.48643064553067e-05
ADSL	858.871854014382	0.757378572819655	0.0560253941294702	13.518487189388	1.21651751945976e-41	2.28691377347441e-40
ADSS	710.633067193522	-0.00167389905360202	0.0472515329952438	-0.0354252856467219	0.971740622332435	0.999525589211984
ADSSL1	131.100953025263	1.11350906084383	0.0937699836108705	11.8748987465403	1.59827461490064e-32	1.71853737218324e-31
AEBP1	7304.84722211744	0.932178208975657	0.16870063779185	5.52563535726414	3.28295354213661e-08	7.57102606138861e-08
AEBP2	545.389782000223	-0.057740327395176	0.051883854559475	-1.11287659495282	0.265761433353811	0.326205369459551
AEN	610.588954158231	0.973311300048192	0.0923942387320716	10.5343289084359	6.000976410535e-26	4.30481101548745e-25
AES	7048.14088165945	0.305928057835916	0.062065829403395	4.92908998037465	8.26135214043201e-07	1.72981380557782e-06
AFAP1	1558.13939677046	-0.608789934634568	0.0713990253504275	-8.52658606537859	1.50730041632199e-17	6.36896597597378e-17
AFAP1L1	378.43861713417	1.30057097691974	0.120213632919967	10.8188309872109	2.80330092615322e-27	2.16788604955849e-26
AFAP1L2	714.075022368245	-0.473179282117153	0.117252715915041	-4.03555071986571	5.44743696843536e-05	9.97432284285471e-05
AFARP1	3.32151751814795	-0.111439543687911	0.121716134565935	-0.915569197833364	0.359892893076541	0.431329015206336
AFF1	1044.65096261652	-0.317005524424339	0.0579306881839863	-5.47215188291114	4.44603526039624e-08	1.01570685049831e-07
AFF2	169.038835348597	-1.94965014228877	0.19336575480979	-10.0827064451334	6.58858645657355e-24	4.16299022504423e-23
AFF3	458.727339488825	-0.791082484142229	0.106117707114339	-7.45476420150936	9.00286968599952e-14	2.99791607916094e-13
AFF4	2473.57548163126	-0.406437901424204	0.0473165561881572	-8.58976083990515	8.71505397294936e-18	3.74669423035887e-17
AFG3L1	281.847276363952	-0.0804047107915442	0.0795011207775951	-1.01136575189269	0.311841406605788	0.377827017588236
AFG3L2	1050.39744880006	-0.233804793580649	0.0406137934605754	-5.75678294635559	8.57320284674469e-09	2.05698454967521e-08
AFM	0.0555511816985548	-0.28864355847127	2.90469144273556	-0.0993715043961549	0.920843306955361	0.981728389098758
AFMID	321.523537747029	0.0744178574263608	0.0767735371437703	0.969316514452133	0.332387292057185	0.400873182029703
AFP	4.91076958267714	1.62799653124441	0.385821061037937	4.21956366732487	2.44775592626974e-05	4.60765052176778e-05
AFTPH	735.273916803445	-0.256516276812087	0.0321133889423586	-7.98782953965141	1.37335164175778e-15	5.13509563433133e-15
AG2	805.343444703685	-0.254180106449506	0.10973137202067	-2.31638502069969	0.0205372558886074	0.0295530273003019
AGA	447.422200742826	0.548684878002819	0.0691228085099133	7.93782674389061	2.05754469713425e-15	7.60112053718385e-15
AGAP1	579.745310874426	0.0178589504712348	0.0749498389030889	0.238278703898572	0.811664937549075	0.88955004425215
AGAP11	12.4992646222582	-0.327106532100635	0.138171745080184	-2.36739090116295	0.017914000761533	0.0259409674708056
AGAP2	2386.96535352245	0.35657209158361	0.180525207535309	1.97519280798427	0.0482462717819964	0.0660935380021513
AGAP3	2541.35801761686	-0.423729287052369	0.0563265620637676	-7.52272589569132	5.36458171217049e-14	1.81053485134352e-13
AGAP4	227.31452566389	-1.27026150901	0.089195624824532	-14.2412983989842	5.0774823379723e-46	1.20636086391342e-44
AGAP5	38.1295586574115	-0.174729405807828	0.0787646716129066	-2.2183728088977	0.026529423525835	0.0376022591769903
AGAP6	159.497257586164	-0.0994283025421487	0.0833821443786331	-1.19244117890098	0.233088301908736	0.289015424650419
AGAP7	19.1288205545711	-0.0400551653991263	0.133783896374191	-0.299401994445524	0.764633340577963	0.845306058762049
AGAP8	50.3692004641614	-0.033131202526166	0.115724001510332	-0.286294995798326	0.774652190572521	0.855087668518898
AGBL1	0.19756439712256	-0.793192523085626	0.614455019375443	-1.29088785683915	0.196742566723023	0.246772892493195
AGBL2	19.3376025843785	0.625495329410475	0.187557285128851	3.33495619208159	0.000853128381793861	0.00141387441709177
AGBL3	17.4196726844792	0.355149391379807	0.088232923094934	4.02513459740742	5.69427364548146e-05	0.000104108173826158
AGBL4	30.2235429738041	-0.132269445926995	0.144013103802257	-0.918454240862787	0.35838110491945	0.429647722597821
AGBL5	633.519048977482	0.301984910952803	0.0397393683113132	7.59913717266693	2.98111656328419e-14	1.02044121902385e-13
AGER	105.204781811319	-0.265760188687213	0.105961879163655	-2.50807357122041	0.0121391389428702	0.0179058882454485
AGFG1	1918.82923660849	0.0361343571846695	0.0315679779455788	1.14465225637711	0.252353236224373	0.31116149680139
AGFG2	1060.50662702356	-0.376948026610308	0.074355676961008	-5.0695258521818	3.98807967495633e-07	8.53537347407627e-07
AGGF1	1114.32727757975	-0.0330932962682036	0.035385415320695	-0.935224186809222	0.349672776268966	0.41987134798904
AGK	783.347323469228	0.236877928476286	0.038213636079471	6.19878014182326	5.6902452138558e-10	1.48212436424827e-09
AGL	602.868243981287	-0.207217551995567	0.0521515578060689	-3.97337223877621	7.08621750515308e-05	0.00012855585023148
AGMAT	28.7455594262644	0.21872432001186	0.105321920275698	2.0767217255374	0.0378272502284465	0.0525430284218472
AGPAT1	2982.95042527055	-0.00509384419537648	0.0341951348703179	-0.148964003642461	0.881582036924984	0.950612301408612
AGPAT2	283.586477184759	0.369424437250508	0.0852930138362827	4.33123910898033	1.4827255853362e-05	2.83464358146678e-05
AGPAT3	3066.8706360387	-0.480581967585473	0.050034075494348	-9.605093385602	7.60889254262904e-22	4.22074151731771e-21
AGPAT4	918.843338808097	-0.499381479883043	0.0665369231633174	-7.50532871286056	6.1274644790949e-14	2.0616549996204e-13
AGPAT5	2770.32201138229	0.0756194432342469	0.0481622477946627	1.5700978815741	0.116392341362492	0.151103158108515
AGPAT6	1900.14639958411	-0.266611973000386	0.0448086580877988	-5.9500102073573	2.68125766942599e-09	6.66680131648978e-09
AGPAT9	20.0153544254539	1.33794683818368	0.156413049349678	8.55393359918815	1.18963357611612e-17	5.06358172264405e-17
AGPHD1	19.2550810802066	0.323432991705792	0.0957140019102702	3.37916067921811	0.000727074999585856	0.00121353278017385
AGPS	955.393381289671	-0.0571294036150022	0.0327951619746639	-1.74200705760008	0.0815072093171997	0.108236780857098
AGR2	0.330913518655547	-0.7396656095924	0.693541875983037	-1.06650461234801	0.286195594811247	0.349330102109296
AGR3	5.01612389660566	0.763500381486069	0.599554248432052	1.2734467039184	0.202859573363023	0.253831902710584
AGRN	4991.05390650232	0.146572674666051	0.073075821820276	2.00576156401682	0.0448816932874768	0.0617459879746786
AGRP	0.69559260014187	1.21811406281335	0.276970296563091	4.39799530104441	1.09255343926296e-05	2.11144196611776e-05
AGT	14133.1559701283	-0.317264350548905	0.102112789170164	-3.10699916364252	0.00188996933396603	0.00302763568365639
AGTPBP1	505.670860467892	-0.406138262092545	0.0640645425871918	-6.3395170821643	2.30486460200656e-10	6.16631799641425e-10
AGTR1	15.7220537336021	2.07033811314325	0.207286010066682	9.9878332960205	1.72306790095498e-23	1.06684141308735e-22
AGTR2	0.0788117344221362	0.175435048387072	1.84992852648185	0.094833419710928	0.924447141395288	0.984399677537399
AGTRAP	773.083420000146	0.598322633393779	0.0695579848447034	8.60178216389689	7.84876600953605e-18	3.38830266436189e-17
AGXT	1.38579618428755	3.50561054829597	0.51033097381369	6.86928822308911	6.45230258800358e-12	1.90792333236513e-11
AGXT2	0.0217616525339458	-0.0953988503302225	2.90469144273556	-0.0328430238498512	0.973799768633448	0.999525589211984
AGXT2L1	1829.68280579306	-2.67025649194895	0.186834576384994	-14.2920895244068	2.45142165596895e-46	5.94612977314977e-45
AGXT2L2	470.011667510577	0.245965173715845	0.0543757660779299	4.52343371794219	6.08443795523432e-06	1.199491317377e-05
AHCTF1	1040.35685648558	-0.562013687151825	0.0553367673911821	-10.1562435546494	3.10822064559106e-24	2.00373034099561e-23
AHCY	2809.74284187655	0.819381854500663	0.0498678893627946	16.4310514234835	1.14653639216839e-60	6.09425812764441e-59
AHCYL1	14122.1397207615	-0.841790929112149	0.0986634149022241	-8.531946010042	1.43906217079688e-17	6.09368821303723e-17
AHCYL2	2691.2117821565	-0.475924192356779	0.0820931319028548	-5.7973691748046	6.73632929392947e-09	1.62994372608944e-08
AHDC1	1502.53350739854	-0.405364392708436	0.0642133367804556	-6.31277571035393	2.74074577296109e-10	7.29681472158669e-10
AHI1	335.945907369907	-0.0810769056661855	0.058958516622549	-1.37515172210383	0.169084412034881	0.214179381123321
AHNAK	9367.8960937821	-1.71551618237593	0.100563361473049	-17.0590576652083	2.99345104141956e-65	2.04968244919423e-63
AHNAK2	418.611999112783	0.726670384685398	0.169537531561993	4.28619184195026	1.8176203923771e-05	3.45545880050867e-05
AHR	718.335753576355	1.03966871741254	0.126615781488936	8.21120957582513	2.18971300105595e-16	8.62243218466918e-16
AHRR	56.6179535974356	-0.0674842624721637	0.101031086800762	-0.667955424504595	0.50416204669193	0.585723787013366
AHSA1	1677.17612675266	-0.218230236768708	0.038161669328449	-5.71857155646021	1.07423277742438e-08	2.5637020901378e-08
AHSA2	593.006223674534	-0.235050015161338	0.100557259886713	-2.337474344728	0.0194145334080802	0.0280028232012392
AHSG	2.57360248140757	0.000445455561390875	0.194293233739118	0.00229269724332757	0.998170693869566	0.999525589211984
AHSP	0.543163826002048	1.22580123383469	0.393860587676619	3.11227188550568	0.00185653430461421	0.00297697645852921
AICDA	0.079423048913907	0.0790366577688207	0.945910824316751	0.0835561405335543	0.933409339717686	0.991035310020774
AIDA	1003.14924395287	0.15473491973925	0.0394984227284937	3.91749616947682	8.94734671424827e-05	0.000161133951785366
AIF1	1094.4786277687	0.293546386864901	0.10890340395175	2.6954748539812	0.00702883828834972	0.0106319468471471
AIF1L	3579.34194349102	-0.0583982391739073	0.089620173400104	-0.651619350402189	0.514646761538255	0.596779615284863
AIFM1	578.918364610193	-0.0339291073182893	0.0360428820028449	-0.941353893831553	0.346523532806858	0.416546422855912
AIFM2	208.869676886442	-0.00367539361932147	0.0696593384083686	-0.0527623963032058	0.957921223147909	0.999525589211984
AIFM3	263.215939565734	-1.64350845938566	0.192309790811229	-8.54615073134225	1.27261788785817e-17	5.40862602339723e-17
AIG1	869.808697210933	0.441661480380581	0.0574366514801255	7.68954089416941	1.47663933284087e-14	5.16208609176066e-14
AIM1	174.991365803078	1.20299797915707	0.174784815180474	6.88273737003365	5.87132149215053e-12	1.74056614289249e-11
AIM1L	0.217040817169001	0.891970427707742	0.60201463395058	1.48164243426176	0.1384354617337	0.177869905224692
AIM2	23.7785307189257	0.352038464922436	0.159195391065035	2.21136091043377	0.0270108544739618	0.0382406526115677
AIMP1	986.803160729432	0.149078596399841	0.0330405647609864	4.51198693116376	6.42231462347359e-06	1.26395253867165e-05
AIMP2	595.437145230238	0.420711499661746	0.0455366599640401	9.23896262909881	2.48898539368519e-20	1.24638882588806e-19
AIP	1198.11898765052	-0.2127628721574	0.0539432862615729	-3.94419559694057	8.00682874975878e-05	0.000144698188182957
AIPL1	0.372116053545025	-0.0771046038642238	0.397936739360113	-0.19376095805632	0.846363058559665	0.920487509088715
AIRE	8.67855056833584	0.153818249524414	0.202624097226953	0.759131078827841	0.447774149468309	0.526290751431342
AJAP1	77.4623050031369	-1.62982101110411	0.146932864118623	-11.0922836826233	1.36751367961897e-28	1.14705953900834e-27
AK1	1654.69347500634	-0.380497687619922	0.0955903409385986	-3.98050350991352	6.87694493261569e-05	0.000124862677535385
AK2	1871.25006635652	0.679950772623448	0.0482212008935981	14.1006602909742	3.76232889418977e-45	8.48891599467073e-44
AK3	1738.73345617142	-0.0999889121913303	0.0561419306436977	-1.78100238172972	0.0749120616502724	0.100051869674458
AK3L1	378.543779490268	1.3255342829299	0.108517083316234	12.2149825854341	2.58556835015347e-34	3.09765539884729e-33
AK5	607.155830827648	-1.24637877709741	0.177687732240822	-7.01443347483428	2.30882549140928e-12	7.03275234639961e-12
AK7	16.2459118271318	0.545352580419894	0.238616675548255	2.28547556103056	0.022284957837812	0.0319420968572214
AKAP1	1214.32387935604	-0.66963505541771	0.0506229404992458	-13.2278972500162	6.05579657042799e-40	1.03394206379948e-38
AKAP10	460.111528338939	-0.02906936731847	0.0446404218978353	-0.651189349979679	0.514924264337489	0.59696099310613
AKAP11	2012.70977662976	-0.9649334588974	0.0586925934773503	-16.4404638086026	9.81647860255985e-61	5.2319177849319e-59
AKAP12	2568.4730060214	0.838395458216762	0.121178120828061	6.91870324847137	4.5579650367341e-12	1.36248401583138e-11
AKAP13	2044.28696943196	-0.55894399986526	0.0568433330187804	-9.83306168342717	8.11145020034602e-23	4.81076084062627e-22
AKAP14	7.60603874996389	1.84637719703404	0.427092387818571	4.32313300282557	1.5382893170984e-05	2.9385900739301e-05
AKAP2	331.583221958473	0.19072630163865	0.11849001201194	1.60964032664146	0.107476399155922	0.140276298322508
AKAP3	81.1605890945393	-0.944939678535677	0.092110835151055	-10.2587244702108	1.08125491830964e-24	7.17924141045998e-24
AKAP4	0.0194723937999122	0.0156482259078759	2.90469144273556	0.00538722484517627	0.995701637261788	0.999525589211984
AKAP5	118.149563672513	-0.670710417431861	0.126407922959287	-5.30592071865528	1.12105678252953e-07	2.49039537585696e-07
AKAP6	1822.83447819863	-1.4735764476566	0.08161237546481	-18.0557965536977	7.1029832339713e-73	7.69619941614912e-71
AKAP7	495.522168380551	-0.269361688482039	0.0718472072061439	-3.7490905903856	0.000177476972885736	0.00031173473815861
AKAP8	619.931115182289	0.0210823179957872	0.0355093486850743	0.593711762577295	0.552704914397954	0.635493027341126
AKAP8L	1186.24865404922	-0.451788453508728	0.0481620972086387	-9.38058098989287	6.56101883513658e-21	3.41380716171223e-20
AKAP9	1006.40274899482	-0.922437691151802	0.0710892049430414	-12.9757772912341	1.67884511677286e-38	2.61300913202532e-37
AKD1	164.233570403109	-0.670785442773752	0.0811754337577292	-8.26340447746462	1.41575500205859e-16	5.64013911931219e-16
AKIRIN1	1932.67339514061	0.164567247589369	0.0349029310051476	4.71499793427372	2.4171320155578e-06	4.89885337582732e-06
AKIRIN2	1226.59613319559	0.308404537958762	0.0403414800758582	7.64484935552285	2.09190094921171e-14	7.23090038886152e-14
AKNA	764.907883118758	-0.727938684376592	0.070966481238039	-10.2575000433642	1.09504978725992e-24	7.26838835569357e-24
AKNAD1	29.2803241807652	0.864386249177277	0.177146189559468	4.87950800029544	1.06350809613413e-06	2.20878142767403e-06
AKR1A1	1717.79016341615	0.249755677238416	0.0481183684180655	5.19044359668373	2.09793667465885e-07	4.57091053190503e-07
AKR1B1	3077.26546372792	0.32680539607329	0.045797228607566	7.13592079716588	9.61413605753874e-13	3.00508421389545e-12
AKR1B10	3.54617541466662	0.884109789391395	0.348085612959987	2.53992051516655	0.0110877664248495	0.0164213859480309
AKR1B15	1.14797054558082	-0.0891140987301293	0.418837411308931	-0.212765374639372	0.831509972382664	0.90733602564111
AKR1C1	336.706220874757	-2.29442301167126	0.179577474111158	-12.7767863036709	2.21014558347397e-37	3.19063476618644e-36
AKR1C2	60.281510597194	-0.457403276336042	0.175737645094548	-2.60276206665884	0.00924761078970541	0.013816416756799
AKR1C3	485.54111574421	-1.38293516776089	0.142152458684859	-9.72853498669875	2.2785073663764e-22	1.30692743644394e-21
AKR1C4	0.297186901873588	-0.791683332664939	0.893767617466259	-0.885782072648012	0.375734972064378	0.448706694671443
AKR1CL1	0.00258279910794859	-0.0250070938671827	2.90469144273556	-0.00860920836522028	0.993130930418914	0.999525589211984
AKR1D1	0.218863788581323	0.474230441222438	0.573506874129096	0.826895827434649	0.408296108616317	0.484306722521129
AKR1E2	4.18607093450116	-0.171268539872921	0.189244303620491	-0.905012920316914	0.365458542377572	0.437414570022197
AKR7A2	1002.27302524693	-0.188369752502097	0.0513475523670923	-3.66852447328765	0.000243954345150365	0.000423111669865014
AKR7A3	23.6804853049422	-0.764903834328224	0.11743580509608	-6.5133783832147	7.34791012339548e-11	2.03255418198007e-10
AKR7L	19.078238594024	-0.682469860229889	0.098325284352787	-6.94093960390916	3.89500520384744e-12	1.16838306388609e-11
AKT1	3504.32277491507	0.257145022603046	0.054687544072613	4.70207662391302	2.57528814953997e-06	5.2076171358622e-06
AKT1S1	1141.25478499903	0.00896616143580304	0.0448322782951493	0.199993437245708	0.841485713759399	0.916193588523374
AKT2	2456.88167100913	0.143458155636018	0.0518813361988035	2.76512068012865	0.00569017403869261	0.00867630491622572
AKT3	1120.68588160512	-0.731143196727762	0.0780649476702163	-9.36583215064027	7.54533425276818e-21	3.91254250498523e-20
AKTIP	1030.00815885237	-0.54116886344644	0.0480235602317203	-11.2688201548412	1.87059644061494e-29	1.64385747811616e-28
ALAD	1739.00337705319	-0.642204031686213	0.0592670209876809	-10.8357737740809	2.32987298173101e-27	1.80957444662212e-26
ALAS1	1011.26500841115	0.140539132496947	0.0346663884859805	4.05404596887219	5.03393176538608e-05	9.2437968538424e-05
ALAS2	7.1687151900429	1.6022985592722	0.304265922287392	5.26611244278208	1.393429566793e-07	3.07433777770844e-07
ALB	10.6264287630464	-1.23472782930044	0.173124805721573	-7.13200990553708	9.8913754101159e-13	3.08880321595385e-12
ALCAM	3378.13951124793	-1.02945485201926	0.0859369246245714	-11.979191209327	4.56757969040601e-33	5.09930084937862e-32
ALDH16A1	425.457994377041	0.145394584123094	0.0628946989789692	2.31171444467381	0.0207934248448141	0.0299085585659909
ALDH18A1	1148.30674393081	-0.164267401848384	0.0551287631537807	-2.97970410455542	0.00288526941357496	0.0045322218285565
ALDH1A1	780.358927280264	-0.626177362630637	0.135056664104085	-4.63640477709456	3.54521400568194e-06	7.09114719464934e-06
ALDH1A2	65.1611079313562	-0.114361557863463	0.143952720213737	-0.794438324566996	0.426940300572437	0.504268251514641
ALDH1A3	119.856609447572	0.538703508503788	0.263516876286165	2.04428466250786	0.0409254335326322	0.0566032788093355
ALDH1B1	510.614230155944	0.126619296311901	0.0571958006583277	2.21378658668125	0.0268434632158033	0.0380227765131188
ALDH1L1	2591.04457300652	-0.196331329357765	0.132523953887749	-1.48147805433018	0.138479228670925	0.177914547487826
ALDH1L2	316.345966602589	-0.693032283286146	0.0917662928442055	-7.55214427657798	4.28149803400017e-14	1.45470608598352e-13
ALDH2	5410.1853791184	-1.37637564175528	0.0787028951267513	-17.4882466463098	1.76092134597808e-68	1.42317085830688e-66
ALDH3A1	26.0609206862882	1.07996069452677	0.219285702642944	4.92490245150744	8.44024485013059e-07	1.76595892248886e-06
ALDH3A2	2333.77311049617	-0.123822370556244	0.0510824966065929	-2.42396865427017	0.0153519305186702	0.0224073833218601
ALDH3B1	288.221014615519	0.193807497362744	0.0887036794048876	2.18488679007451	0.0288971483185917	0.0407677611133659
ALDH3B2	0.265430884964156	-1.01617664097365	0.397962915475005	-2.5534455635414	0.0106662950399159	0.0158292698816332
ALDH4A1	2535.31017955548	-0.756264925304287	0.0795304146651695	-9.50912840688978	1.92266655877724e-21	1.03677835764526e-20
ALDH5A1	1919.11378049572	-1.34732903546692	0.075818523450084	-17.7704467741837	1.19733362921562e-70	1.07814699397863e-68
ALDH6A1	1031.06000625182	-1.03904200204166	0.0856124207887617	-12.1365800951403	6.75925100736188e-34	7.84996642315525e-33
ALDH7A1	2105.28693845624	-0.370679497689077	0.0988729770765238	-3.74904760278621	0.000177507393365857	0.000311760402313386
ALDH8A1	21.5348165858239	-0.355575266168407	0.125359670159757	-2.83644066481084	0.00456194541570909	0.00701783006457471
ALDH9A1	3149.02645663745	-0.149198746881883	0.0506298495881919	-2.94685344901122	0.00321025307324868	0.00501872448108958
ALDOA	22463.8315519293	0.342826600161801	0.0542727825762181	6.31673158973103	2.67152984439207e-10	7.11638099843464e-10
ALDOB	5.94131418015919	-0.871333010280909	0.121478497236841	-7.17273451763331	7.35143302742259e-13	2.31692918812168e-12
ALDOC	13963.8249881161	-1.28825567586189	0.122935631202348	-10.4791073447329	1.07755994140812e-25	7.58639130473695e-25
ALG1	460.11916101646	0.676071950624474	0.0504332273059804	13.4052882739928	5.63040809515286e-41	1.01677333000379e-39
ALG10	61.8233939334909	0.145862841819561	0.0646207347398438	2.25721422708655	0.0239946918516757	0.0342013244174229
ALG10B	289.399722502467	-0.343338390382097	0.0524008802138122	-6.55214929560662	5.6714797301086e-11	1.57834575610699e-10
ALG11	12.5797612317305	0.146982546251601	0.0761124431434508	1.93112374509619	0.053467751198584	0.0728769735717498
ALG12	342.516621920664	0.298025474662694	0.0477735906354182	6.23828920327678	4.42382233508961e-10	1.1608486553289e-09
ALG13	499.924681308563	0.262790853054338	0.0388463263627836	6.76488300592827	1.33416965504963e-11	3.86454547555505e-11
ALG14	220.27910617933	0.75742832491034	0.0538785686169209	14.058063240241	6.87418543974084e-45	1.5369493976382e-43
ALG1L	20.6774338970304	-0.906102591012966	0.15430548435483	-5.87213471252491	4.30218915569693e-09	1.05534482087752e-08
ALG1L2	0.0377826276672802	0.170196466216648	2.0762313663889	0.0819737477103354	0.934667589473051	0.99169508578546
ALG2	556.305973998421	0.583441815065904	0.039817036058312	14.6530699626023	1.28763758483106e-48	3.55135848571588e-47
ALG3	572.20066541529	0.762173179493101	0.0501456216387196	15.1991969505189	3.57982558534671e-52	1.21087753933168e-50
ALG5	528.677820059873	0.833609693315719	0.0586142991487704	14.2219510498609	6.69597169265806e-46	1.57948040405762e-44
ALG6	285.764930343647	0.963482629251268	0.064750725256108	14.8798739387152	4.45337806846512e-50	1.32061075955086e-48
ALG8	609.738150562104	0.514254230705272	0.0352203139558491	14.6010688987589	2.76476330635688e-48	7.51834274267182e-47
ALG9	596.261192171084	0.203434971821507	0.0314749659550271	6.46338973367548	1.02383148503949e-10	2.80221469604146e-10
ALK	123.675192644682	-0.204703324726791	0.163556113228936	-1.25157856032112	0.210723470919329	0.263120803300776
ALKBH1	229.760092419059	0.262890812126752	0.0386777171496251	6.79695782224572	1.0685136258276e-11	3.11564227433391e-11
ALKBH2	476.509241897797	0.0918434786690138	0.0600212688793414	1.53018222346554	0.125971630246474	0.162863734902017
ALKBH3	289.591559619356	0.25109679791637	0.0455655890161747	5.51066722361992	3.57476006228209e-08	8.22186475719651e-08
ALKBH4	496.327961519421	0.0665638542796246	0.0439304864144134	1.51520867881366	0.129719565919035	0.167467747294493
ALKBH5	2077.33175314122	0.0516450690006215	0.0335804604412173	1.53794999598133	0.124060841561142	0.160477520208968
ALKBH6	144.75934672424	0.317494713390341	0.0575666360391463	5.51525562783344	3.48273364941645e-08	8.02049603719402e-08
ALKBH7	747.744805316643	0.286728439006826	0.0681179045681765	4.20929623165156	2.56167349866699e-05	4.8165714524898e-05
ALKBH8	220.390179085358	-0.317486011312184	0.0451570965149643	-7.03070028443868	2.05499506579611e-12	6.2828686352712e-12
ALLC	0.944952744585855	0.155013553647425	0.334187942236725	0.463851426266061	0.642754195746511	0.726117824250756
ALMS1	486.029837686364	-0.671582671966265	0.0598972379520088	-11.2122477584752	3.55060315247293e-29	3.08177351086119e-28
ALMS1P	5.65705870244311	-1.37095812348152	0.12900759207865	-10.6269569208431	2.23279369471463e-26	1.63743739902464e-25
ALOX12	5.25970764181499	0.0824099300287964	0.0859560636670292	0.958744811163416	0.337687317862834	0.406792541738246
ALOX12B	2.76071138137537	-1.76224475794392	0.221144987507401	-7.96873027874955	1.60312917728385e-15	5.96485044830895e-15
ALOX12P2	7.88510601506822	0.90944477960051	0.221584738745127	4.10427534292684	4.05584182696585e-05	7.50503901921427e-05
ALOX15	2.22139732231019	-0.648159316592231	0.354890067244534	-1.82636646222511	0.0677950801347629	0.0911142220580334
ALOX15B	127.896803944732	-0.384286774040652	0.230956521105664	-1.66389228674274	0.0961339567142134	0.126426250510456
ALOX5	447.544387092466	0.57922275354434	0.109581973658648	5.2857485059417	1.25191791926647e-07	2.77297780163257e-07
ALOX5AP	1095.97654509011	1.49015119835474	0.11822957517772	12.6038784806152	2.01011556597001e-36	2.75083129499851e-35
ALOXE3	4.43536241087251	-0.83920784404059	0.186596649962125	-4.49744325104943	6.87755097786959e-06	1.35098421439972e-05
ALPI	0.002867663739967	-0.0571406291946211	2.90469144273556	-0.0196718413370639	0.984305153789895	0.999525589211984
ALPK1	210.294191400155	0.449456235279989	0.109068523788387	4.12086108501858	3.77458977243921e-05	7.00234339722496e-05
ALPK2	50.8677846163576	3.17638243372598	0.246134365550991	12.905074943986	4.21405316429388e-38	6.4071802929742e-37
ALPK3	320.747612674425	0.354171204803041	0.104608605744508	3.38567943127027	0.000710022741192511	0.00118668094383561
ALPL	442.805004805951	-0.560488995659565	0.092775161221023	-6.04136913677017	1.52811920312327e-09	3.85746424546733e-09
ALPP	0.0512750904076503	-0.209727956315208	2.42004719144976	-0.0866627547827147	0.930939582369039	0.989425916272396
ALPPL2	0.0252997513161321	-0.0457782499311284	2.90469144273556	-0.0157601076856603	0.987425773936304	0.999525589211984
ALS2	760.307353272467	-0.219687565646517	0.0351185195025883	-6.2556044149391	3.95979302305768e-10	1.04241247383123e-09
ALS2CL	63.8551155610313	0.136453559489086	0.141116097042387	0.9669595627216	0.333564248883533	0.402169661774472
ALS2CR11	3.50809261490015	-0.347934130082639	0.163150172824596	-2.13260043835016	0.032957517340062	0.0461526943577633
ALS2CR12	8.98844377339838	-0.559782220847532	0.158546006937798	-3.53072418321549	0.000414423653614233	0.000706469091396324
ALS2CR4	958.009725203208	0.323033365736169	0.051709208637533	6.24711486111771	4.18103603774453e-10	1.09860134129676e-09
ALS2CR8	208.3549178056	-0.48933999125478	0.0553524880432781	-8.8404335297843	9.53479001367931e-19	4.35044097801379e-18
ALX1	0.987264664091056	2.4275095247375	0.688050044786053	3.52810023505242	0.000418553631523063	0.00071307797957968
ALX3	59.4801598472716	-0.00180229100314183	0.101480674200823	-0.0177599431353326	0.985830360463009	0.999525589211984
ALX4	2.36989405845447	0.417640305574721	0.327146268886991	1.27661644131112	0.201737694431892	0.252588402171233
AMAC1	0.0533116475729062	-0.320772672515147	1.32224733617762	-0.242596573075688	0.808317936214514	0.886394355900028
AMAC1L2	1.16682651974908	0.0628068852952656	0.18175586664123	0.345556302835831	0.729676190318456	0.811620197026338
AMAC1L3	0.617628007957605	-0.651253797868806	0.256352576899032	-2.54046128869347	0.0110706348305863	0.0163992834348786
AMACR	345.206831656682	0.108597069254072	0.0560459611714398	1.93764308764164	0.0526667818215847	0.0718398656375217
AMBN	0.145729616523636	0.323413497391306	0.991670826963844	0.326129889674669	0.744326083545263	0.825819194751468
AMBP	0.571569251878961	-0.350044931345142	0.605623726155557	-0.577990782440435	0.563270342403773	0.645983783204559
AMBRA1	835.133469527118	-0.218883609982632	0.0373346052607394	-5.86275409781304	4.55252175020119e-09	1.11536500079473e-08
AMD1	2101.90832809289	0.390077850248265	0.0544924793490421	7.1583795582082	8.16362662740033e-13	2.5638910191485e-12
AMDHD1	15.144853485851	0.4474395117784	0.118740775362095	3.76820439662747	0.000164426045840969	0.000289766007505264
AMDHD2	213.213461834933	0.0423758258229832	0.0563562577564039	0.751927603251263	0.45209459727299	0.530894498289129
AMELX	0.0515878065761038	-0.145457939595081	1.65030206129701	-0.088140191426994	0.929765252527365	0.988689228959853
AMELY	0.0027193462763349	-0.0250070938671827	2.90469144273556	-0.00860920836522028	0.993130930418914	0.999525589211984
AMFR	3842.46624407013	-0.0706817162034365	0.0378946244498407	-1.86521748743003	0.0621509253161804	0.0839980979531956
AMH	98.5847249724214	-0.075092913354874	0.16570165611513	-0.453181429295427	0.65041810365966	0.733599005042811
AMHR2	0.0111538677962735	0.0274541013477858	2.90469144273556	0.00945164121182189	0.992458793683426	0.999525589211984
AMICA1	47.8656517005895	1.0317947034497	0.176658125739717	5.84062974250004	5.20038669099211e-09	1.2687322225209e-08
AMIGO1	225.39837655824	-0.490947068424509	0.0899028831638666	-5.46086010978821	4.7383331184393e-08	1.08010552647813e-07
AMIGO2	212.122475615561	0.597102756882101	0.154848700156168	3.85603983940396	0.000115238715053793	0.000205675396946402
AMIGO3	162.216557923377	0.259476411179917	0.0627781594302026	4.13322743984563	3.57704434700597e-05	6.64838025664069e-05
AMMECR1	132.210100737476	0.536894565336972	0.0634361454443581	8.4635433249629	2.59373993561004e-17	1.07931106837371e-16
AMMECR1L	695.114407735784	0.000891100609519798	0.0322424525704287	0.0276374946221391	0.977951276694245	0.999525589211984
AMN	0.740207699181836	0.0942240372695135	0.251116416176143	0.37522053995634	0.707496455625702	0.789890171824652
AMN1	341.166443863678	-0.0659041169180587	0.0603694015822456	-1.09168080502294	0.274973425040822	0.336796795887559
AMOT	1844.03245912715	-1.34829616799687	0.100104789926484	-13.468847684382	2.38559995358315e-41	4.400751270782e-40
AMOTL1	1455.10166299748	-0.568314494136034	0.0669489431541357	-8.48877468950646	2.0882714038932e-17	8.73212724443891e-17
AMOTL2	1908.53425902724	-1.04506517235665	0.103230488806663	-10.123609647087	4.34104217010784e-24	2.76860774885274e-23
AMPD1	0.0750647958513115	-0.052341228741538	1.73070035763593	-0.0302428022913418	0.975873412837411	0.999525589211984
AMPD2	1583.28369986227	-0.351889382717287	0.0457823968201179	-7.68612845019634	1.51654250842612e-14	5.29407298037936e-14
AMPD3	377.667085969471	-0.00697631699474523	0.0956631694217065	-0.0729258400794974	0.941865131276047	0.996383262097722
AMPH	479.73266871007	-0.350337111229798	0.12539983411862	-2.79376056349804	0.00520990380172717	0.00797108410040032
AMT	235.452572939817	0.143020997019863	0.102678765836969	1.3928975076205	0.163650786241263	0.207670109696121
AMTN	0.0273961991665252	-0.174312391240882	2.90469144273556	-0.0600106395730348	0.952147160810161	0.999525589211984
AMY1A	2.12300844920364	-3.68257117475039	0.238555880099032	-15.4369331547042	9.23901143013814e-54	3.38649266547071e-52
AMY2A	2.36012949536487	-3.43861905044201	0.232204049022185	-14.8086093456255	1.28879140979666e-49	3.72653469225663e-48
AMY2B	219.4768857779	-1.46551276579076	0.11152974725225	-13.1401065804997	1.93953370108564e-39	3.2222076314582e-38
AMZ1	116.440285494045	-1.52988958511826	0.125871426910294	-12.1543834265785	5.43704351166676e-34	6.38205345536122e-33
AMZ2	1838.50237320852	0.162996812114989	0.0413286001888054	3.94392288561322	8.01594438461971e-05	0.00014484965020132
AMZ2P1	491.734436161825	-0.0485906620757591	0.056947609755225	-0.853252002755055	0.393519570753548	0.468215635046456
ANAPC1	437.015287736261	0.127712208566649	0.0503937674382948	2.53428578688877	0.0112676795048385	0.0166778233007143
ANAPC10	124.642470420601	0.445771712970084	0.0409476506906431	10.8863806702333	1.33854701574421e-27	1.05415923124903e-26
ANAPC11	1956.06439330488	0.601779634859647	0.061716542685398	9.75070230241569	1.83196471323492e-22	1.05632585219277e-21
ANAPC13	1367.88884875852	0.268458193957811	0.0380712481704304	7.05146815139935	1.77039753203189e-12	5.44228204702555e-12
ANAPC16	1259.37525403165	-0.117966692800071	0.0523032937050915	-2.2554352593016	0.0241060216656075	0.0343500792864933
ANAPC2	955.211908448199	-0.428517977957142	0.0445339901909326	-9.6222677581761	6.43955198319996e-22	3.58520511317626e-21
ANAPC4	471.47047634076	-0.0688251920615572	0.0353094345703727	-1.94920119506266	0.0512714023147058	0.070057653384562
ANAPC5	2395.77847430491	0.194408584027688	0.0368024714389313	5.28248719247791	1.2744174741132e-07	2.82027972051535e-07
ANAPC7	1257.72792561632	0.381999508750949	0.0343823927408471	11.1103235784147	1.11753820447023e-28	9.42594242607051e-28
ANG	105.973584542281	1.25289717105204	0.113947813976505	10.995359431032	4.02307459406452e-28	3.28781728118327e-27
ANGEL1	764.55458866641	-0.45775153039254	0.0543540374977106	-8.42166564741066	3.71169062201893e-17	1.53319101521184e-16
ANGEL2	702.077534118973	-0.178397368040996	0.0325861349223289	-5.47464031761415	4.38401145265674e-08	1.00235021271178e-07
ANGPT1	262.859729441928	0.520396626899567	0.164487004533979	3.16375526670902	0.00155747702478082	0.00251646431205882
ANGPT2	634.761589811779	1.85216760586518	0.138599575339078	13.3634435843972	9.88816891068707e-41	1.76465783636877e-39
ANGPT4	2.85170682347621	-1.1934343858205	0.219361851413952	-5.44048282838572	5.31363616710788e-08	1.20692127638064e-07
ANGPTL1	143.226357903283	0.2310601989971	0.156311957558504	1.47819912568506	0.139354487869652	0.178957443396037
ANGPTL2	2906.95729475018	-0.689607909846704	0.096536229872985	-7.14351400250494	9.09746498385294e-13	2.84855524740521e-12
ANGPTL3	0.105016736532513	-0.245585884078696	0.859753889980411	-0.285646726279181	0.775148711433702	0.855587495768494
ANGPTL4	941.818293522977	1.66002894162402	0.158868152025943	10.4490983274793	1.47924864067759e-25	1.0344249359632e-24
ANGPTL5	1.91925382465526	-0.0870423566410674	0.221281857030493	-0.393355143567296	0.694057195136331	0.776820925596711
ANGPTL6	24.3965608136839	0.724455529339981	0.139381305565723	5.19765205527062	2.01821438045801e-07	4.40451389803363e-07
ANGPTL7	2.3996429634838	-0.034188748799972	0.305988444325629	-0.111732156667945	0.911035781631435	0.974010605246512
ANK1	157.096054892637	-1.04630997361094	0.136808099204647	-7.6480119210325	2.04110296292257e-14	7.06026143287721e-14
ANK2	5181.99232986255	-0.750249420768824	0.0727121850238753	-10.3180700803102	5.83848973010722e-25	3.93623991376801e-24
ANK3	546.477701519635	-1.2521091637788	0.131433086951393	-9.52659024315435	1.62534085206482e-21	8.81753001450296e-21
ANKAR	20.6909523386696	-0.0394200582838266	0.0677946644768858	-0.581462547060273	0.56092875327979	0.643785066620735
ANKDD1A	249.431354325129	-0.45697817889236	0.067264213360137	-6.79377868355748	1.09233919064829e-11	3.18370216369854e-11
ANKFN1	71.5541411094229	-0.865404324980933	0.107015202905763	-8.08674189725174	6.12819398644167e-16	2.34292333099321e-15
ANKFY1	3668.85618225248	-0.573501862214427	0.0445131140398654	-12.8838854477987	5.54710723487611e-38	8.31855168606516e-37
ANKH	1758.93898929335	-0.138736653222662	0.0711583816122431	-1.94968814747175	0.0512132998661051	0.0699879607317805
ANKHD1	1526.45501751711	-0.241678508965896	0.0440719530620344	-5.48372586587475	4.1645995979724e-08	9.53954048925727e-08
ANKHD1-EIF4EBP3	418.86518411791	0.171862851101491	0.0674528519886123	2.54789599008364	0.0108374777311926	0.0160724269278121
ANKIB1	2711.03670448555	-0.137861424934607	0.0612658591438805	-2.25021613768355	0.0244352283761575	0.0347915309442474
ANKK1	4.89589825009196	1.08617153647132	0.234541045795975	4.63105096502459	3.63814298204659e-06	7.26817744969697e-06
ANKLE1	30.308316064808	0.03325108933884	0.102617660972198	0.324028914943293	0.745916143254979	0.827350601551729
ANKLE2	1195.08441428585	0.0116914738925281	0.0291531941860511	0.401035777346213	0.688393783193865	0.771270121276236
ANKMY1	160.546009385809	-0.285283713039182	0.053383176211451	-5.34407529273215	9.08797893270252e-08	2.03237632743132e-07
ANKMY2	721.734613033689	0.368349663635566	0.0487674513174501	7.55318667850419	4.2473552188324e-14	1.44335421187963e-13
ANKRA2	313.719807008439	0.0305390621755745	0.0416505626743556	0.73322087901534	0.463423722900165	0.543033799726143
ANKRD1	4.19014019645091	1.67702678761733	0.290323896739766	5.776399416134	7.63160888484042e-09	1.83799862248477e-08
ANKRD10	2021.21568660028	-0.123332091577872	0.0783422901960735	-1.57427222601228	0.115424527867356	0.149945434093824
ANKRD11	2296.27578679519	-0.589149026349802	0.0469361300353173	-12.552143219019	3.86894410134961e-36	5.20433681300235e-35
ANKRD12	903.010209200534	-0.810552803594533	0.0518684103418436	-15.6270993896383	4.75982425195513e-55	1.89241399694667e-53
ANKRD13A	963.595284327661	-0.200006997461646	0.0382567192383314	-5.22802272237835	1.71332458366314e-07	3.76202658833504e-07
ANKRD13B	632.782898867597	-0.673250843490394	0.0778929205929832	-8.64328668594103	5.46186440756383e-18	2.381865681494e-17
ANKRD13C	640.115397496494	-0.24373014475346	0.0285727008221261	-8.53017522812269	1.46126207945782e-17	6.18503717684228e-17
ANKRD13D	604.268363448708	-0.140336294825005	0.0474905421188073	-2.9550366991795	0.00312631859940679	0.00489487914095291
ANKRD16	165.724371990644	-0.598647650966056	0.0592696002104509	-10.1004165514938	5.50080333544284e-24	3.49021369932216e-23
ANKRD17	2142.54254301516	-0.285321092786764	0.0490733064388429	-5.81418114025682	6.09314075163608e-09	1.47812443870419e-08
ANKRD19	45.0830082181514	-1.70581364215323	0.0833661062139961	-20.4617166330703	4.72453195505198e-93	1.29399680768924e-90
ANKRD2	4.01194634617246	-1.11420174622845	0.239251516001759	-4.65703108113329	3.20802028575373e-06	6.44217515632013e-06
ANKRD20A3	63.7750771757577	-0.622243248822987	0.154144059507952	-4.03676438008229	5.41934476914066e-05	9.92657243613727e-05
ANKRD20A4	5.90588832169918	-0.155561205370193	0.220138371881227	-0.706651930060265	0.47978280899565	0.560504561220037
ANKRD20B	20.2565875972886	-1.18478817087583	0.14272569530966	-8.30115536172587	1.03103758509912e-16	4.14094932345308e-16
ANKRD22	193.294295702248	-0.155203052031421	0.153580174214057	-1.01056697471317	0.312223728988599	0.378220525563928
ANKRD23	47.1420617089074	-0.707941047296156	0.0780811418860067	-9.06673532425669	1.2263635325618e-19	5.88845601707298e-19
ANKRD24	163.679733888606	-1.03013442952879	0.115415600536149	-8.92543490432337	4.43951408949385e-19	2.0613896360918e-18
ANKRD26	187.504658359429	-1.29882873278445	0.0690027974150346	-18.8228417026678	4.90802768524879e-79	7.38826763000811e-77
ANKRD26P1	0.731431314339144	-0.176131383746599	0.321589274327347	-0.547690479152342	0.583904450631735	0.666816989023502
ANKRD27	572.136823991253	-0.324536323862885	0.037253559179551	-8.71155215797548	2.99741815057506e-18	1.32859262596854e-17
ANKRD28	1171.87074630651	-0.646349519079738	0.0606392921210802	-10.6589225644184	1.58422056628634e-26	1.17050691521793e-25
ANKRD29	43.912366592286	0.207353933373893	0.138975769755301	1.49201500188837	0.135695212577576	0.174542403759037
ANKRD30A	0.00831690435455379	-0.0221664990513097	2.90469144273556	-0.00763127495236943	0.993911182634744	0.999525589211984
ANKRD30B	0.735887210396879	-1.11108847331234	0.381157509726032	-2.91503760246248	0.00355645689369451	0.00552971142029927
ANKRD31	0.464077005308585	-1.19794723355536	0.307115643604348	-3.90063892381419	9.59391526407806e-05	0.000172274639416882
ANKRD32	135.682092053574	0.392735314721953	0.0627289666003493	6.26082870492827	3.82936981299692e-10	1.00888674298329e-09
ANKRD33	0.454697196050711	1.03209013433935	0.327747849348019	3.1490370917535	0.00163809402308908	0.00264130941417144
ANKRD34A	92.3532895293674	-0.393775193449275	0.112551966587722	-3.49860784655744	0.000467693903031311	0.000793369786475481
ANKRD34B	2.2991469694092	-0.161910044031912	0.345904821525248	-0.468076863797325	0.639729623770721	0.723366184018654
ANKRD34C	5.62509843615861	-1.85527167333091	0.290269824145425	-6.39154165884436	1.64221526503754e-10	4.43744656433821e-10
ANKRD35	284.040787679701	-0.230284618525071	0.123492779154992	-1.86476181118289	0.0622147983997855	0.0840613788587714
ANKRD36	179.136066469037	-0.788492085522707	0.0902605692309345	-8.73573136355173	2.42084670170563e-18	1.07884964876011e-17
ANKRD36B	25.7481809244994	-0.582703150175309	0.111155778639617	-5.24222093809909	1.58655234201586e-07	3.48910585307825e-07
ANKRD36BP1	79.2978766335631	-0.795664128062623	0.105161546185042	-7.56611287040773	3.84557947046057e-14	1.30907694040191e-13
ANKRD37	106.291265295843	0.615305294931576	0.0781691975880476	7.87145466394884	3.50541174292362e-15	1.27352099429723e-14
ANKRD39	149.73698775089	0.164533408523071	0.0534074744626894	3.08071876040523	0.00206501597937808	0.00329546937875988
ANKRD40	2475.18352223014	-0.346871844804425	0.0438968404948579	-7.90197747478109	2.74513034723687e-15	1.00471363117133e-14
ANKRD42	248.647239943273	-0.0999895964470281	0.0547656204175061	-1.82577309788069	0.0678844471699198	0.091221894254911
ANKRD43	176.474549814269	-1.05673711848862	0.158092647593494	-6.68429009555095	2.3204673730194e-11	6.61839985477908e-11
ANKRD44	140.572953790611	-0.622078471117421	0.088758958465002	-7.00862743181815	2.40667366565591e-12	7.31949486223544e-12
ANKRD45	103.044253751252	0.212839478642121	0.151034965157084	1.40920665900612	0.158774069306439	0.202040694761758
ANKRD46	1101.10290290486	-0.53774648060174	0.0679417146996149	-7.91482056317292	2.47609944668824e-15	9.08947898151379e-15
ANKRD49	212.837867543836	0.469689592795332	0.0464842883131043	10.1042655452019	5.28903822935631e-24	3.35801139352564e-23
ANKRD5	29.7463332252046	0.98625704862321	0.170917551710095	5.7703672838473	7.90989406361246e-09	1.90339366607001e-08
ANKRD50	534.461535808049	-0.25427450773045	0.0639245761916279	-3.97772692255646	6.95772114567619e-05	0.000126282798888849
ANKRD52	1443.60217806666	0.0320858495182433	0.0566565607132211	0.566321871894986	0.571174994717435	0.653908324866637
ANKRD53	37.6345266948704	1.05351418673216	0.154195455621373	6.83232967201746	8.35465765035391e-12	2.45169417953838e-11
ANKRD54	556.698485384341	0.167782805478603	0.0476720588230179	3.51952086024845	0.000432327037059869	0.00073559009239177
ANKRD55	8.42924550979698	-0.588278891579705	0.158654085550219	-3.70793408527445	0.000208957026520517	0.000364690022389998
ANKRD56	10.9932303686044	-1.22433524655141	0.217747248819043	-5.62273577825493	1.87956771788053e-08	4.40988404480715e-08
ANKRD57	341.54171187778	-0.0711967793938147	0.0598174001349236	-1.19023526989177	0.233953934277434	0.290052281148686
ANKRD58	27.1295348122822	0.0129788960297112	0.108990718886312	0.119082580263091	0.90520993146948	0.969148154002831
ANKRD6	676.367455215942	-0.352954757788447	0.0709031738666522	-4.97798248710629	6.42504679812486e-07	1.35597092100837e-06
ANKRD7	5.47965250499879	0.967848038969215	0.181148706087115	5.34283716331805	9.15029570603226e-08	2.04584842769792e-07
ANKRD9	88.8664213108017	0.404365819976792	0.0983259830080979	4.1125021851395	3.91393764976885e-05	7.24789655868548e-05
ANKS1A	954.906392800892	-0.668997180804379	0.0519057205522259	-12.888698464965	5.21159264073697e-38	7.8392530034579e-37
ANKS1B	517.962283520138	-1.1098565758036	0.129160792654813	-8.59282877560013	8.48539383337949e-18	3.65194164980889e-17
ANKS3	400.541006945787	-0.586125076505989	0.068287926258073	-8.58314358955508	9.23150068857733e-18	3.96181052402057e-17
ANKS4B	0.0824311756924006	-0.064145573931983	1.09751514693823	-0.0584461855591986	0.953393226866252	0.999525589211984
ANKS6	510.048503164702	-0.106909568383731	0.0540939330502897	-1.97636892633301	0.048113008257204	0.065920136374075
ANKZF1	633.512449871427	-0.489691520138359	0.0679649574462347	-7.20505887943418	5.80187737514603e-13	1.83914196813824e-12
ANLN	1313.41539539408	-0.508708545300175	0.125094306931561	-4.06660029363679	4.77039600987476e-05	8.77866828244964e-05
ANO1	58.5139878349944	1.05182557431173	0.146973213949694	7.15658007364353	8.27145741819758e-13	2.59610282169117e-12
ANO10	554.819195779536	0.14825174138017	0.0418538538612245	3.54212880543164	0.000396911610218766	0.000677436121993601
ANO2	14.8398145177331	-0.22484187980546	0.118153362269269	-1.90296641151057	0.0570449281721396	0.0775222922992621
ANO3	64.4060680708695	-1.37324194789406	0.184046725725098	-7.46137668292566	8.5623077281001e-14	2.85603363325666e-13
ANO4	70.9078234214448	-0.491470151332176	0.161633315175524	-3.04064883405051	0.00236068984867201	0.00374068331183705
ANO5	162.141171521893	-0.39173624776359	0.145709887418512	-2.68846716378577	0.00717808950396333	0.010851880176185
ANO6	1954.5910347354	0.273489931192811	0.0756219944633787	3.61653951517046	0.000298567757260285	0.00051470899319633
ANO7	20.1229919615952	0.167634205844948	0.121409306125653	1.38073605059117	0.167360132454952	0.212186049377115
ANO8	845.814903726928	-0.526161118753721	0.0754157727489727	-6.97680471305505	3.01968985173709e-12	9.12058261238405e-12
ANO9	2.13258811694111	-0.110946859812351	0.293466975449473	-0.378055689715769	0.705389224156235	0.787849767804767
ANP32A	2556.60124169261	-0.410573476235799	0.0377222529497434	-10.8841186337093	1.37219545718151e-27	1.07979626558737e-26
ANP32B	2267.74265389659	-0.34293050183703	0.0531525865606298	-6.45181211352449	1.10520549821362e-10	3.01785483763074e-10
ANP32C	1.71264180339049	-1.36824136908046	0.161928539653424	-8.449661634749	2.92148278399403e-17	1.21313203833149e-16
ANP32D	0.050308467153291	-0.241858247664	1.2066685763042	-0.200434694673799	0.841140627557717	0.916020166525192
ANP32E	1728.08355296299	-0.297524888778997	0.0439137133497269	-6.7752158969004	1.24220618527714e-11	3.60770338345585e-11
ANPEP	192.293639296117	2.73476973973504	0.145861636330685	18.7490680108304	1.97013377015933e-78	2.83584218595197e-76
ANTXR1	4579.76878811749	-0.600311938240603	0.0600330462337556	-9.99969143499931	1.52872650616783e-23	9.50693368074098e-23
ANTXR2	489.823006867955	0.699713062206591	0.0957615949889915	7.30682339080744	2.73531689656453e-13	8.83256086462298e-13
ANTXRL	0.224762120552827	-0.714722010338488	0.549667749223513	-1.30028005344708	0.19350500191306	0.243083108531376
ANUBL1	91.9278307616198	-0.544607368683359	0.0853451895078334	-6.38123099642743	1.7567008807153e-10	4.73059420561324e-10
ANXA1	4747.9584899333	1.33085630509093	0.168554511926341	7.89570264172174	2.88684215955103e-15	1.05540466048102e-14
ANXA10	0.0401193782272832	0.123418764251791	1.48503336376284	0.0831084117457587	0.933765337381905	0.991035310020774
ANXA11	1105.93175136259	-0.144858059891478	0.074699060951077	-1.93922196674401	0.0524743159114343	0.0715971431379979
ANXA13	5.54058495482337	0.129447073841517	0.205994488425775	0.628400666594339	0.529741500519037	0.612518463221073
ANXA2	3934.11030081433	1.58373745666675	0.130388254756673	12.1463199244616	6.0006318414282e-34	7.01437225328773e-33
ANXA2P1	39.0505344789816	2.54348014522126	0.133546448311631	19.0456592247669	7.13816858609777e-81	1.18289650855335e-78
ANXA2P2	1829.33849305794	2.13494494346982	0.139925705461561	15.2577036251307	1.46307238593004e-52	5.02644380671437e-51
ANXA2P3	1.52172421846025	0.3361964506817	0.245095895637599	1.37169351533656	0.170158867966726	0.215429691596291
ANXA3	35.9088054897809	-0.999632232997948	0.181364160121012	-5.51174075589665	3.55301991843991e-08	8.17472322851886e-08
ANXA4	603.389318914109	0.788789115495588	0.0810244076178034	9.73520373288441	2.13389662694967e-22	1.22647745506988e-21
ANXA5	10049.3793982822	1.02822861724773	0.0827353734853341	12.4279201740715	1.84368917283265e-35	2.39351879448715e-34
ANXA6	4256.88425166536	-0.311585063805756	0.0544512641874972	-5.72227419243831	1.051074933033e-08	2.50873852328863e-08
ANXA7	1910.61725621931	-0.293181511925524	0.0488989260858008	-5.9956636145974	2.02656135934435e-09	5.07476698492324e-09
ANXA8	1.89567222872986	-0.558512490579924	0.302352721081907	-1.84722164424848	0.0647150236877077	0.0871886497999314
ANXA8L1	0	NA	NA	NA	NA	NA
ANXA8L2	1.22437218182077	-1.40375761699221	0.377392034432899	-3.71962704274248	0.000199517172687706	0.000348955977419207
ANXA9	42.3442012494242	-0.541499097417722	0.065711392884804	-8.24056641695304	1.71397288371445e-16	6.79934525585374e-16
AOAH	250.279254784976	-0.0869688853205741	0.112745314844731	-0.77137471690371	0.440484856742522	0.518588738803734
AOC2	20.5683458522932	-0.759091619542195	0.10945451941642	-6.93522408749729	4.05577744738595e-12	1.21550047511324e-11
AOC3	52.3194860909948	-0.041634326747184	0.110638054296839	-0.376311089451014	0.706685636013655	0.789208332891
AOX1	68.346882198975	1.7156165364317	0.198141010284985	8.65856358541897	4.77746119448061e-18	2.08987432908513e-17
AOX2P	0	NA	NA	NA	NA	NA
AP1AR	377.613511928856	0.00815831431609711	0.0456500121415465	0.178714395317151	0.8581619653331	0.930666937295643
AP1B1	4108.04064618259	-0.381000847595119	0.0492731334990875	-7.73242577726815	1.05516341910582e-14	3.7234470174486e-14
AP1G1	1986.94009608844	-0.237038402839791	0.034426383236077	-6.88537047921394	5.76373347336681e-12	1.70969952007812e-11
AP1G2	325.431120698451	-0.229476401985369	0.0788520762914516	-2.91021381779704	0.00361181569942782	0.00561312992298185
AP1M1	1847.79632964288	0.152838276447782	0.0329376728629465	4.64022692446251	3.48026794243411e-06	6.96760241876149e-06
AP1M2	0.629395855252838	-0.424071976711808	0.415186386091578	-1.02140144984973	0.307064278716096	0.37261138245532
AP1S1	1423.12888998027	0.649069216579049	0.0593519605718845	10.9359355668281	7.76013776920896e-28	6.1955431906397e-27
AP1S2	1416.53072607483	0.797540831502283	0.0698905242670853	11.4112870072987	3.67254755234939e-30	3.40812412858023e-29
AP1S3	37.4557381123228	0.953630135064785	0.104833804651555	9.09658996193495	9.32124845949639e-20	4.5096913547907e-19
AP2A1	2841.22667782503	-0.194323101293087	0.0439953355708782	-4.41690235502409	1.00125432993813e-05	1.94051453428795e-05
AP2A2	2331.20038254862	-0.174122286041746	0.0422824468630294	-4.11807496869331	3.82050420458288e-05	7.08474650200803e-05
AP2B1	9284.25631406344	-0.553141633597014	0.0409255366577577	-13.5158064809924	1.26165458102404e-41	2.36725293413836e-40
AP2M1	8492.72699450361	-0.0191997146284844	0.0386487052190231	-0.496775105910514	0.619347652007919	0.702775516289554
AP2S1	1473.96474514101	0.918703456698318	0.0575520539029179	15.9630003517866	2.31337769853387e-57	1.03446277131718e-55
AP3B1	916.639128171865	0.103704605767679	0.03977029918124	2.60758927900138	0.00911822888295612	0.0136313754508297
AP3B2	628.420967971559	-0.639086847345058	0.0932233401691903	-6.85543820018876	7.1094251775769e-12	2.09594654659615e-11
AP3D1	3578.27132960933	-0.146257907416427	0.0433503628572538	-3.37385659026736	0.000741229729833751	0.00123569619345013
AP3M1	1199.77085608921	-0.308117509681378	0.0385179826401669	-7.9993158665602	1.2511239213239e-15	4.6905254236706e-15
AP3M2	844.07517177554	-0.25907904696708	0.0502873396111584	-5.15197361742302	2.57759304147023e-07	5.58143568439585e-07
AP3S1	737.395598927967	0.486138929511132	0.0409571548148043	11.869450690833	1.7058398189308e-32	1.8302046370683e-31
AP3S2	1977.80277270225	-0.105718028791975	0.0346672923659783	-3.04950348230035	0.00229219975658376	0.00363800235008707
AP4B1	434.32545585673	0.211535355783865	0.0391332201535834	5.40551876266934	6.4621085464237e-08	1.45954393008218e-07
AP4E1	243.707655602816	-0.182446970389588	0.0413790776306148	-4.40915991454102	1.03772379381545e-05	2.0086290944288e-05
AP4M1	477.16235851646	0.574500805625169	0.0507396877547625	11.3225136189618	1.01518628800123e-29	9.09149573087388e-29
AP4S1	124.154943759074	-0.155581766700654	0.0613998869883872	-2.53390965898813	0.0112797807976575	0.0166944819370914
APAF1	496.398102010944	-0.0644027324475389	0.0451881069595487	-1.42521421632446	0.154095288122281	0.196505372592562
APBA1	713.704779962228	-0.805369194981971	0.0853244265220413	-9.43890545544921	3.76693634766416e-21	1.99152774198223e-20
APBA2	2988.5637267338	-0.755783989196016	0.0622154403872821	-12.1478524380985	5.8892266319713e-34	6.89231745890053e-33
APBA3	305.35822243171	0.460516623966789	0.051209869976045	8.99273175624562	2.41160304650047e-19	1.13881254973633e-18
APBB1	3135.03157488949	-0.768681379883151	0.0575904035366818	-13.347386590086	1.22677758211427e-40	2.17750260299671e-39
APBB1IP	838.70935778843	-0.168669335098441	0.100430014427439	-1.67947138173822	0.0930602117740111	0.122621099571261
APBB2	2007.97657784423	-0.442997193077157	0.0641841257937251	-6.90197439941552	5.12846793424229e-12	1.52539046249258e-11
APBB3	491.298836384496	-0.109376370870505	0.0796692871087081	-1.37287999980798	0.169789655150795	0.214989854858976
APC	3172.63218305035	-0.783579435453939	0.0633315349708124	-12.3726581996641	3.67455986912276e-35	4.63314070454609e-34
APC2	6455.8076243266	-0.983253825178249	0.085729317516638	-11.4692832470925	1.8821170557611e-30	1.77925926843763e-29
APCDD1	2190.943488804	-0.412375816049735	0.0790639827966623	-5.21572277873085	1.83101846716065e-07	4.01062803203466e-07
APCDD1L	46.9862580264373	0.739621034617763	0.398127400226577	1.85774964043379	0.0632045755869925	0.0852585149856687
APCS	0.0220246405709556	-0.159665920985099	2.90469144273556	-0.0549682897935384	0.95616372666157	0.999525589211984
APEH	1682.74193734988	0.253669515430837	0.0385763277018651	6.57578184712933	4.83981709918526e-11	1.35281634579636e-10
APEX1	3231.13552370484	0.0547912306368769	0.0466571934563765	1.17433618651121	0.240260394398493	0.297216923501555
APEX2	403.232336137777	0.391007779558463	0.0386220617541694	10.1239488986176	4.32601613283547e-24	2.75991711871613e-23
APH1A	4315.1356697206	0.420970112391122	0.03180977585032	13.2339855009348	5.58457087153683e-40	9.55140829026074e-39
APH1B	817.344943721379	-0.220734512435629	0.0443117875737265	-4.98139489562159	6.3127568369907e-07	1.33270061904996e-06
API5	1875.16749431029	0.101680723788058	0.030787931126181	3.3026163197303	0.000957873512019048	0.00157989843233654
APIP	338.132843816467	0.0344544215627539	0.0468800916224461	0.73494782903234	0.462371267903347	0.541832743228785
APITD1	228.544581108399	0.596365214566097	0.060657326428978	9.8317095341214	8.22111902062501e-23	4.87287247029532e-22
APLF	35.9471442819591	0.60636822515327	0.0824360865422449	7.35561633972681	1.90048148238057e-13	6.19360350893155e-13
APLN	2196.27041487567	0.895576276395311	0.117351381445501	7.6315784728212	2.31896614077296e-14	7.9933599538617e-14
APLNR	4734.33368975975	-0.306623867791204	0.162922871859177	-1.88201855449881	0.0598334964369607	0.0810549254473357
APLP1	5766.931313025	-0.664221942210955	0.101699206852255	-6.53124014207814	6.52273155541129e-11	1.80835465025602e-10
APLP2	12604.8526474944	0.1260111652874	0.0509204350763598	2.4746678833053	0.0133360125887159	0.0195922050398181
APOA1	4.29334319210896	0.442833417114099	0.168258683554113	2.6318607025811	0.00849186718934191	0.0127423239213074
APOA1BP	1952.17211233737	0.526197106277927	0.0617097292836459	8.5269715551544	1.50228790714018e-17	6.34914649138542e-17
APOA2	0.165973967363997	-0.903795964504795	2.25607031625475	-0.400606292274243	0.688710012269543	0.771580584135632
APOA4	0.078537800660975	0.239705384699483	1.10105055780126	0.217706065358309	0.82765813755701	0.903933233973429
APOA5	0.12062371153618	0.244943559962999	0.74178495525217	0.330208314726106	0.74124256464104	0.822814712902972
APOB	8.90972160630156	-0.154943870240003	0.234997533204253	-0.659342539163295	0.509675831633937	0.591643453254457
APOB48R	205.273380298085	-0.120792398680602	0.105448156614771	-1.14551455955638	0.251996067753984	0.310817561654003
APOBEC1	0	NA	NA	NA	NA	NA
APOBEC2	2.07654171389601	-0.391628466854266	0.119827413406849	-3.26827105517644	0.00108206681785358	0.00177523774110421
APOBEC3A	4.03534727092091	1.23866973540598	0.1863162625528	6.6482105127831	2.96677788755654e-11	8.41312337397396e-11
APOBEC3B	54.0670942355339	1.57163451974514	0.133399095656382	11.7814480826276	4.86500116781044e-32	5.05467982240368e-31
APOBEC3C	196.884176996545	0.977626806833605	0.113452470518686	8.61706053966082	6.86948182007718e-18	2.97662451091896e-17
APOBEC3D	23.5826303333334	0.918229553830996	0.130108157753045	7.05743259829919	1.69606985938961e-12	5.22112045381877e-12
APOBEC3F	71.8829747687062	0.758330959290162	0.11187610366692	6.77831042049769	1.21589386954357e-11	3.53284619233819e-11
APOBEC3G	199.082080196453	1.02948631229049	0.113027302680847	9.10829762254374	8.36847245417292e-20	4.06568802158882e-19
APOBEC3H	4.320445794225	0.66445987419618	0.176856532979674	3.75705586331122	0.00017192412791443	0.000302358316460586
APOBEC4	0.352618508776057	0.480914179773831	0.852233667727953	0.564298499325829	0.572551002556099	0.655255398433421
APOC1	2980.87764597243	0.265386563673631	0.118140838506606	2.24635754264424	0.0246811155337511	0.0351213449506113
APOC1P1	2.53884096775553	0.148295781945007	0.210808793390579	0.703461082243612	0.481768451914543	0.562424453691379
APOC2	1317.64803555641	0.969379707202148	0.130113714285689	7.45025005645211	9.31634819806063e-14	3.09811781561139e-13
APOC3	0.102377495098712	-0.552279848731309	2.80811161901873	-0.196673039985604	0.844083408988902	0.918457586012829
APOC4	3.67736182403643	-0.400008016050381	0.1677257412731	-2.38489341596688	0.0170840702119782	0.0248029054391673
APOD	4324.20294374413	-0.615353429953352	0.138928536104085	-4.42928031352991	9.45480682304532e-06	1.83621026738678e-05
APOE	51119.0891034587	-1.0524394944991	0.101124219154801	-10.4073930389318	2.29418156868207e-25	1.58463259314923e-24
APOF	0.256751035738552	-0.166049803278811	0.5477629430981	-0.303141724665871	0.761781857531656	0.842711608044432
APOH	2.35274000557587	0.318455943001159	0.471271413222114	0.675737874325656	0.499207084792998	0.580562812964602
APOL1	518.888524687536	0.980154434682623	0.139412957564498	7.03058346803354	2.05671642709635e-12	6.28715671095023e-12
APOL2	1452.30761840671	-0.180855202168962	0.0899408361847989	-2.01082411328002	0.0443440381931265	0.0610446375684785
APOL3	298.399092663418	-0.104186243449369	0.0922280867906666	-1.1296585137437	0.258620144684019	0.318232200996434
APOL4	688.933422927314	1.4615080508616	0.171568823029696	8.51849435726817	1.61640912017327e-17	6.81539188578511e-17
APOL5	0.0925932239297264	0.166472838433905	0.854915693922345	0.194724274706117	0.845608807195347	0.919819387605067
APOL6	898.978416950177	0.231796832767259	0.101866672589723	2.27549233595606	0.022876411914842	0.0327217320003901
APOLD1	1614.30570492647	-0.558554060185599	0.102667043356868	-5.44044166387532	5.31486417821641e-08	1.20706117234167e-07
APOM	85.2711966858011	-0.180901214246285	0.0742333475861495	-2.43692653138597	0.0148126885561776	0.0216583538465056
APOO	455.500174534688	0.314719612896128	0.049709671325061	6.33115457227863	2.43333418865336e-10	6.49767775223347e-10
APOOL	126.458777772851	-0.164864942601994	0.0835879111676393	-1.97235390021112	0.0485692205389299	0.0665082306109088
APP	28604.4123226528	-0.0344487515555657	0.0515035363863844	-0.668861867991508	0.503583596609252	0.585155177958544
APPBP2	1430.24435695734	-0.244509029702623	0.0359411976036575	-6.8030295595309	1.02441618119417e-11	2.99015498714463e-11
APPL1	1390.70182489556	-0.375879794393917	0.0399535443173104	-9.40792114483476	5.06046215266201e-21	2.65334521804028e-20
APPL2	1775.35112794529	-0.397668139990418	0.0475728788545264	-8.3591354899175	6.31795174377401e-17	2.57257915315349e-16
APRT	832.784186689493	0.350202441221971	0.0576854460869186	6.07089768698845	1.27197210066979e-09	3.23238270943405e-09
APTX	506.03355860505	0.243053328014912	0.0432991162372251	5.61335540160411	1.98440434762849e-08	4.64813946116466e-08
AQP1	23828.8261310882	0.55003780658609	0.17418262504356	3.15782246621061	0.00158952328028375	0.0025663500153263
AQP10	0.093763400125208	0.102204987953408	0.945229384210771	0.108127180196313	0.913894807869132	0.976484916080369
AQP11	70.3629454736753	0.0315626249039845	0.0583279968341795	0.541123073259549	0.58842275564804	0.67147136979222
AQP12A	0.0272129891419933	-0.0282879883862059	2.32036674962005	-0.0121911712408557	0.990273093632433	0.999525589211984
AQP12B	0.375663429506442	-1.06967439313132	0.457282701121508	-2.33919715420657	0.0193252323071484	0.0278842160749957
AQP2	0.436815399935679	0.356020526523341	0.457068176878276	0.778922148890173	0.436025575821174	0.513983164277216
AQP3	49.3090852576738	-0.0636169982052052	0.164346505165137	-0.387090666401955	0.698689087187643	0.781428584354601
AQP4	29691.1007572537	-0.0973720705732961	0.125774189577244	-0.774181657624558	0.438823373653557	0.516941274100845
AQP5	75.9046851660278	1.30396325069111	0.274289219828215	4.75397192608509	1.9945874630693e-06	4.07008120568363e-06
AQP6	85.723604998569	-0.0650758558198147	0.108358422188535	-0.600561123957564	0.548132337848316	0.631118684087627
AQP7	1.38568338130614	-2.79870236415327	0.23518326855549	-11.9000912834619	1.18217771834047e-32	1.28585463903332e-31
AQP7P1	37.4960110189472	-0.68694945160454	0.237866947554324	-2.88795672819425	0.00387753211620423	0.00600855990346907
AQP7P3	3.89388926794969	-2.10342320048436	0.289769302226686	-7.25895802046986	3.9008350444917e-13	1.24897657212821e-12
AQP8	1.25320847276674	-0.486694470587867	0.229346430877884	-2.12209306560785	0.0338299236086874	0.0472870777972296
AQP9	101.625772353967	3.02864242366161	0.210316871680428	14.4003778653743	5.14613917713538e-47	1.29111786988689e-45
AQPEP	5.12064494783455	0.516795413933475	0.121103426365948	4.26738887116069	1.97774235866826e-05	3.74902233134077e-05
AQR	680.238019343499	-0.17273233021712	0.0489315541270912	-3.53008060542032	0.000415433078981686	0.000707945067189668
AR	88.427973357153	-0.54998336668744	0.136803672283193	-4.02023832773243	5.8139294964399e-05	0.000106236739871937
ARAF	928.36049284529	0.373902700787847	0.0373136766114183	10.020526915148	1.23840935282532e-23	7.72585651303867e-23
ARAP1	2256.08065248024	-0.588412226977677	0.0483705616891779	-12.1646763326572	4.79341516023353e-34	5.64672323535276e-33
ARAP2	1210.54942679235	-0.751631597586041	0.0836693302573609	-8.98335860074504	2.62624884113084e-19	1.23691490678529e-18
ARAP3	669.855848793732	1.26524492992011	0.118120039850788	10.7115179737358	8.98758783971493e-27	6.75439147100528e-26
ARC	1600.78323080398	0.474293866758413	0.159965895498457	2.96496865960399	0.00302713766727151	0.00474562006507625
ARCN1	2860.7412481369	0.0995245228485565	0.0347367182472895	2.86511011604622	0.00416864255312566	0.00644345752842436
AREG	15.6549309539842	3.08204184920546	0.326609700473735	9.43646757807583	3.85558508124094e-21	2.03784877518283e-20
ARF1	7363.33902510844	0.370975809430304	0.0316846779985032	11.7083660893706	1.15483610214531e-31	1.16966450612766e-30
ARF3	7045.06876388437	-0.239124108795109	0.0489879322310767	-4.8812860209563	1.05396244685657e-06	2.18964806700501e-06
ARF4	3932.46541090588	0.884039518639142	0.0508207596890701	17.3952440704909	8.96440836840712e-68	7.01500527876938e-66
ARF5	3047.87515563913	0.539928923421119	0.0512313017072851	10.5390436203642	5.70763649320777e-26	4.09885621435023e-25
ARF6	1328.98116310081	0.251380410254469	0.0398845374398902	6.30270341315412	2.92498280490776e-10	7.76425641577346e-10
ARFGAP1	2050.71687849205	-0.424608769664313	0.0578736897000802	-7.33681871442395	2.18730557794801e-13	7.10487003741307e-13
ARFGAP2	2285.80929393838	-0.560692465495167	0.0378689275735364	-14.8061353046341	1.33710191917628e-49	3.86056366707998e-48
ARFGAP3	976.085579289723	0.0239405579423808	0.040170726342241	0.595970253024934	0.55119509922045	0.633991165293199
ARFGEF1	959.593512115389	-0.271214301047492	0.0399706248187269	-6.78534054139737	1.15813003973347e-11	3.36947836877309e-11
ARFGEF2	835.612188838086	-0.430079150562529	0.0501309658532116	-8.5791115978464	9.56086833952659e-18	4.0995939042284e-17
ARFIP1	728.621946540612	0.331855182539186	0.0385054546705985	8.61839407891941	6.78996486536005e-18	2.94346245647176e-17
ARFIP2	1067.4066565464	0.289636012381245	0.0417070289756262	6.94453715584752	3.79703134382148e-12	1.13951389590868e-11
ARFRP1	756.880259394307	-0.32668287245161	0.0496700854027645	-6.57705477658446	4.79858036282619e-11	1.341860532543e-10
ARG1	2.81813685308176	1.1777911937299	0.263938310734875	4.46237300849055	8.10569669211647e-06	1.58371483967638e-05
ARG2	224.640128647494	0.628400614539447	0.0653212203087952	9.62016036394892	6.57286099814764e-22	3.65323615793324e-21
ARGFX	0.0206441310603701	-0.112885915401879	2.90469144273556	-0.0388633070421986	0.968999371193214	0.999525589211984
ARGFXP2	0.446803588723367	-0.620487192160284	0.283544990234779	-2.18832006746624	0.0286462961442316	0.0404398997755205
ARGLU1	2223.83282162469	-0.248156037307066	0.0771676766016299	-3.21580288840555	0.00130080144303999	0.00211945835385843
ARHGAP1	2875.11975923523	0.0905298571304038	0.0466461671111688	1.9407780475221	0.0522852048385479	0.0713440519939222
ARHGAP10	166.30840593238	0.225092425677542	0.0765514792345779	2.94040595855487	0.00327782484138682	0.00511908655041958
ARHGAP11A	281.36280673841	1.01760812211304	0.117866793429825	8.63354378702857	5.94798722138234e-18	2.58756470341186e-17
ARHGAP11B	15.1000581751407	0.334457770120164	0.149529066432002	2.2367408431073	0.0253032829189407	0.0359703531690824
ARHGAP12	1334.52501316987	-0.883224449275178	0.0576344243381129	-15.3245991335618	5.23766714406277e-53	1.86102335280933e-51
ARHGAP15	95.7698395396478	0.868310067245234	0.106894411579492	8.12306325854569	4.54562240929646e-16	1.7521437433801e-15
ARHGAP17	883.913077924034	-0.122012837857805	0.0390488229235852	-3.12462268316187	0.0017803326409856	0.0028610984329119
ARHGAP18	417.267454273801	1.19551215008661	0.10274511301391	11.6357081618545	2.71328813315426e-31	2.68200711708281e-30
ARHGAP19	464.591115843314	-0.470994221808237	0.0577889092749149	-8.150252837748	3.63164170530002e-16	1.40832397962772e-15
ARHGAP20	175.221116014533	0.426885572777739	0.107010315697787	3.98920019994453	6.62964513776098e-05	0.000120583473636457
ARHGAP21	4367.62844312325	-0.786594998112563	0.0561722424216518	-14.003268593197	1.48863575150183e-44	3.28733449267816e-43
ARHGAP22	347.827199676344	-1.15221582806448	0.0975124101994568	-11.816094235674	3.22324703938699e-32	3.39594997539547e-31
ARHGAP23	1738.64470940703	-0.488771132264118	0.0744013190683669	-6.56938799451915	5.05224810956353e-11	1.40999621738739e-10
ARHGAP24	375.03133042864	-0.739289031672381	0.0851130073737053	-8.68597003541877	3.75523898122933e-18	1.65408337524776e-17
ARHGAP25	325.367240957415	0.21529942166695	0.0832658985910449	2.58568544037913	0.00971855787816245	0.0144892992634281
ARHGAP26	788.299546205172	-0.290737524737151	0.0714462534447862	-4.0693179938656	4.71509566648001e-05	8.68176344939177e-05
ARHGAP27	366.969873715886	-0.0543250419763129	0.070394651897477	-0.771721153695483	0.440279599112903	0.518419634497673
ARHGAP28	43.0044589838459	-0.603129341094588	0.155203302240056	-3.88605997675048	0.000101884344741926	0.000182584449137658
ARHGAP29	534.455083090211	0.816898614507584	0.0905455187089118	9.02196625692512	1.84743130594631e-19	8.78287014302346e-19
ARHGAP30	483.691257731059	-0.0547353445823968	0.0983631692424664	-0.556461783449387	0.577895212887404	0.660758021577063
ARHGAP31	1985.66385759565	-0.836047607873865	0.0648660510576636	-12.8888315882009	5.20260518001104e-38	7.8375445100388e-37
ARHGAP32	1486.66952035479	-1.1714085153193	0.0719056020152417	-16.2909214649368	1.14491102775328e-59	5.73036686987176e-58
ARHGAP33	1251.38073638273	-0.434380224130788	0.0811711720020124	-5.35141003163067	8.72715241635931e-08	1.95345568275375e-07
ARHGAP36	272.46296522142	-1.94567606094898	0.205024011603419	-9.48999117582645	2.31053825353067e-21	1.23915731192888e-20
ARHGAP39	621.642249266824	-0.563560639235405	0.0623708503058976	-9.03564143299994	1.63043387105611e-19	7.78502565066017e-19
ARHGAP4	595.654481417932	-0.291073062019967	0.0867563875934346	-3.35506203167448	0.00079347189694515	0.00131955353413378
ARHGAP42	265.550663479718	-0.306544197005054	0.0755435171814358	-4.05784915029591	4.95267402733442e-05	9.10306010057179e-05
ARHGAP5	2530.90879307512	-0.893771273599722	0.0589762478389948	-15.1547666450351	7.04652519617573e-52	2.34329640587834e-50
ARHGAP6	238.094188867922	-0.465646649469047	0.0957901739299722	-4.86111080463701	1.16728889681311e-06	2.41541836780216e-06
ARHGAP8	8.05871871258634	-0.917593934404188	0.138745520958938	-6.61350311031484	3.75330109494345e-11	1.05750960983405e-10
ARHGAP9	208.700967016824	0.285192322407322	0.0926967094196543	3.07661754330681	0.00209363738414801	0.00333844337473912
ARHGDIA	5971.97858059102	0.184763463335792	0.0443741377418558	4.16376458762181	3.13042879778999e-05	5.84417834823617e-05
ARHGDIB	2456.57016533232	0.745524633723939	0.0822492985687056	9.06420658531425	1.25514368404887e-19	6.02371220478068e-19
ARHGDIG	265.765247851896	-1.19701379827814	0.173070047313935	-6.91635448684455	4.63413947398747e-12	1.38378604523066e-11
ARHGEF1	1423.05901166152	-0.244476251905193	0.0598875048835739	-4.08225810009074	4.46002250051814e-05	8.22977858241019e-05
ARHGEF10	924.324417831491	-0.0765942150299995	0.0631862944665736	-1.21219665873141	0.225437110203956	0.280162579608142
ARHGEF10L	2130.5883608218	-1.07088406245798	0.0648535533738883	-16.5123421423682	2.99048363857647e-61	1.6245822962184e-59
ARHGEF11	1344.31340145535	-0.440601269168747	0.0535562825417164	-8.22688297727818	1.92148013758865e-16	7.59807265154367e-16
ARHGEF12	3496.12614031082	-0.56660490726496	0.0508749229099748	-11.137214070429	8.26648923450554e-29	7.02954582597884e-28
ARHGEF15	109.305575240197	0.431896146422122	0.091001276914454	4.74604490251414	2.07432682338951e-06	4.22841895361186e-06
ARHGEF16	18.3159054157115	0.0609530441294425	0.163648147638444	0.372464002856355	0.709547408641957	0.791955790039585
ARHGEF17	2008.02767336795	-0.787483986813027	0.0679223624744341	-11.5938839304866	4.4259749823331e-31	4.32508556251778e-30
ARHGEF18	1187.22283468117	-0.365502880199291	0.0399649212394997	-9.14559240612348	5.93039239399032e-20	2.91203530900122e-19
ARHGEF19	51.3149862423614	0.77530147872797	0.106994440418357	7.24618471479897	4.2867540021302e-13	1.36867786325961e-12
ARHGEF2	2610.24332562865	-0.21651414851391	0.0550373590495301	-3.93394872597469	8.35616162319911e-05	0.000150873015207367
ARHGEF3	1089.48060210784	0.456377541511218	0.0592020804720778	7.70880918157032	1.26997130811151e-14	4.45778465574207e-14
ARHGEF33	14.1061542980634	-0.457533416504314	0.088393798729119	-5.17608048395359	2.2659573839462e-07	4.92664604315536e-07
ARHGEF35	11.4834621835859	0.0145586940915448	0.160219690043873	0.0908670718783581	0.927598214753118	0.987320213301801
ARHGEF37	558.531375261626	-1.08983408485414	0.0961253020997192	-11.3376401535108	8.54167718197034e-30	7.68789931667984e-29
ARHGEF38	0	NA	NA	NA	NA	NA
ARHGEF4	2372.47997657902	-0.980961850639109	0.0820542604844063	-11.9550385909033	6.11051841606296e-33	6.75445197111892e-32
ARHGEF5	16.4378141540959	-0.00548343267459411	0.180043760299564	-0.0304561105892843	0.975703295804665	0.999525589211984
ARHGEF6	3728.29637327974	-0.411598368037215	0.0584904686116508	-7.03701607812436	1.96400200001644e-12	6.01492769689767e-12
ARHGEF7	2591.67102391725	-0.426268820615766	0.0680076040263078	-6.26795821906723	3.65812898167801e-10	9.6493182876793e-10
ARHGEF9	1587.79178198816	-0.650747046945396	0.0617159280498412	-10.5442317325255	5.4012485750081e-26	3.88732196712261e-25
ARID1A	2616.90403565934	-0.501959040983245	0.0502584613788085	-9.98755288586882	1.72794796112682e-23	1.06952711216011e-22
ARID1B	1294.441550286	-0.47091154986379	0.052110524328427	-9.0367839497424	1.61348852212262e-19	7.705980541598e-19
ARID2	596.622569528202	-0.278618368795886	0.0478807300545519	-5.81900836679908	5.91977714061699e-09	1.43836871874035e-08
ARID3A	52.3936327424472	0.318170370596709	0.0781536714285512	4.07108667809142	4.67943320956803e-05	8.62012357708375e-05
ARID3B	92.2142569263389	0.0910219454449156	0.0602093408024366	1.51175788061829	0.130595468007014	0.168543365778686
ARID3C	0.847198774111283	0.769928043132024	0.23764439039677	3.2398325996526	0.00119599891861924	0.00195499823235838
ARID4A	587.041681340624	-0.729913148710083	0.0497392531616276	-14.6747910817686	9.35031026284744e-49	2.60067867959593e-47
ARID4B	888.883670929809	-0.542067281569915	0.039129304999615	-13.8532305026948	1.216170497533e-43	2.54865910853887e-42
ARID5A	805.904645546694	0.38790624174825	0.0879561868451381	4.41022122106345	1.032650703084e-05	1.9990057784251e-05
ARID5B	1108.59887031831	-0.129121278529044	0.0708005889230696	-1.82373170185554	0.068192643671078	0.0916235561213911
ARIH1	1148.24704419695	-0.136597941468186	0.0330193797678341	-4.13690209896835	3.52026212868449e-05	6.54592825814787e-05
ARIH2	1781.67180705512	0.0511583501865375	0.0358490482914983	1.42704904661778	0.153565757841849	0.195880772615864
ARL1	1448.21217658327	0.46865626121907	0.0474150830750698	9.8841176862871	4.87860397551691e-23	2.93579708261194e-22
ARL10	103.271288496824	-0.527120859953053	0.0824600182788241	-6.39244170636352	1.63257475158993e-10	4.41260609941796e-10
ARL11	71.1220390946004	0.672837919902666	0.10512104817017	6.40060132213939	1.54766205361719e-10	4.18769150621995e-10
ARL13A	0.24076179351502	0.0824994967423335	0.312217626632282	0.264237152886625	0.791597184236803	0.870314820920303
ARL13B	299.109786652096	0.193768060204776	0.0544173104369425	3.56077980791259	0.000369755059756398	0.000632125685166551
ARL14	0.0295814765098337	0.0856019428485276	1.95354610754257	0.0438187471071307	0.965048883405705	0.999525589211984
ARL15	187.808618331863	0.0725748639593946	0.0702005414792949	1.03382199666936	0.301219386331685	0.366081985607101
ARL16	706.861714902143	0.428392678813756	0.0563291527135169	7.60516816207957	2.84533675608388e-14	9.74471011288191e-14
ARL17A	70.4166196009859	0.430694025731059	0.0609050145559949	7.07156921102263	1.53191364019152e-12	4.72759577223425e-12
ARL17B	2.04649006898669	-0.481175521221932	0.151310464483375	-3.18005448509347	0.001472473637502	0.00238517990237714
ARL2	1560.78890659028	-0.248479602034709	0.0628618145457279	-3.95279079724871	7.72449674368276e-05	0.000139775257648581
ARL2BP	2386.3040567661	0.450249082729264	0.0420833659194059	10.6989798199968	1.02904899980991e-26	7.70711974031579e-26
ARL3	1335.18909329775	-0.653903866094759	0.0673999656637694	-9.70184271838974	2.96101796812352e-22	1.68468766103277e-21
ARL4A	862.492413849704	1.00038828787992	0.0886198866935006	11.2885304326764	1.49515576506985e-29	1.32276678722196e-28
ARL4C	1947.77293505656	1.18411221887859	0.12076601385607	9.8050120316948	1.07134235675879e-22	6.29713003734227e-22
ARL4D	195.642601779311	0.851435325504494	0.0851660261980499	9.9973588473474	1.56515728376014e-23	9.727356330208e-23
ARL5A	1065.07369924803	0.179819480794872	0.0410818425439863	4.37710359758911	1.20266819089931e-05	2.31630205337771e-05
ARL5B	142.160139409676	-0.407120854118164	0.0950033034187039	-4.28533366175572	1.82465127520562e-05	3.46849076027134e-05
ARL5C	0.688868020695912	-1.96456825311571	0.253199687209067	-7.75896793068928	8.56232959514808e-15	3.04397223032847e-14
ARL6	89.9770396894563	0.368114344515094	0.0577095527898578	6.37874193646131	1.78548607841234e-10	4.80482880271443e-10
ARL6IP1	8661.66213520012	0.386074078089247	0.0447533542531848	8.62670708222439	6.31436199165779e-18	2.74266305310145e-17
ARL6IP4	1952.30950438089	0.048546389213947	0.0566420728571575	0.85707296299649	0.391404562296753	0.465867815577738
ARL6IP5	3800.07058847443	0.355862369763123	0.0492138299025318	7.23094240923557	4.79653740777036e-13	1.52722658417273e-12
ARL6IP6	574.685159218776	0.14343593426663	0.0455933718252994	3.14598215758718	0.00165530103575808	0.00266818182320985
ARL8A	2645.12894435783	-0.357829164921112	0.0436955346754119	-8.18914718813286	2.63083643157299e-16	1.02998003634345e-15
ARL8B	2684.87387044948	0.0917641852751617	0.0395093484521138	2.32259424339487	0.0202009602653654	0.0290882027333338
ARL9	14.7339657119846	2.09373088709128	0.218476241626149	9.58333442349315	9.39613939866041e-22	5.17864362609232e-21
ARMC1	757.25437142253	0.250961822336426	0.0481691056078742	5.21001623695088	1.88824105753373e-07	4.13046185852082e-07
ARMC10	677.841989917057	0.532782171390483	0.0457408516128001	11.6478411005664	2.35345614007557e-31	2.33804307719347e-30
ARMC2	51.6413469629598	0.257785847123539	0.0955604522964007	2.69762062577898	0.00698369780076678	0.0105669086650135
ARMC3	40.4354730709641	-0.0331257206976335	0.328787331657169	-0.100751207568344	0.919747960386134	0.980946562232357
ARMC4	22.765955490904	-0.401461997634718	0.215733339016264	-1.86091773976785	0.0627557941924916	0.0846994908956221
ARMC5	539.649379189837	-0.472919284860387	0.0528711334309214	-8.94475404954724	3.72778950677595e-19	1.74034112390203e-18
ARMC6	920.4232528555	0.152570231100195	0.0491088355398618	3.1067776179778	0.00189138621734801	0.00302965934579666
ARMC7	331.252884569411	0.24251290999377	0.0361348510507983	6.71133000251877	1.92858389059733e-11	5.54236000037588e-11
ARMC8	806.564742782942	-0.01011475582553	0.0325988071387906	-0.310279937007084	0.756348086739811	0.837367183388113
ARMC9	236.298326839727	0.424686737185749	0.0575536315867671	7.37897375851073	1.59514264268456e-13	5.2244166938614e-13
ARMCX1	777.962507227855	-0.146611045745271	0.0388068741692246	-3.77796586001611	0.000158114547456206	0.000278967422012739
ARMCX2	986.324631612996	0.129467467474105	0.0666223521813157	1.94330375970145	0.0519794675186609	0.0709661519986149
ARMCX3	2381.92962423392	-0.341076795904146	0.0421055627612656	-8.10051626285149	5.47264469504742e-16	2.09921325396489e-15
ARMCX5	201.112079946961	0.187020655242713	0.0461535815571379	4.05213742754033	5.07518376332365e-05	9.31607780068346e-05
ARMCX6	279.689587370895	-0.134998756372621	0.0451637499429098	-2.98909538165607	0.00279804769564304	0.00440011966172893
ARMS2	0.612023052841908	1.27984785805212	0.310639261239587	4.12004539588772	3.78797758975948e-05	7.02651849026967e-05
ARNT	785.603028938923	-0.0462936926123261	0.0401507649149292	-1.15299652971525	0.248911808890739	0.307148543353068
ARNT2	6245.34444287186	-0.825745153778546	0.0634955794270254	-13.0047660204056	1.14950197590463e-38	1.8120047134164e-37
ARNTL	518.454004868803	0.844829166364417	0.0763352569869957	11.0673520953541	1.80660001988771e-28	1.5063912216569e-27
ARNTL2	77.1685974462359	1.28758697963421	0.127814758332761	10.0738521625337	7.20976824374843e-24	4.54819672958154e-23
ARPC1A	2550.57863908885	0.62139632214154	0.0403769861238721	15.3898639248399	1.91434437906176e-53	6.91407896613515e-52
ARPC1B	1758.28597080111	0.625423032678201	0.0895394638973341	6.98488694767383	2.85085452902997e-12	8.62781634629695e-12
ARPC2	3752.87655815854	0.553766405749541	0.0374724223568773	14.7779719302803	2.03192903127803e-49	5.84958255427777e-48
ARPC3	2679.62208774634	0.189076595803754	0.051139700436162	3.69725661650638	0.000217942003255494	0.00037976639605888
ARPC4	3570.78962839459	0.525656918482688	0.0472720016547927	11.1198362684394	1.00456178656641e-28	8.50577863078127e-28
ARPC5	3301.98342936921	0.896697592574899	0.0601715013971561	14.9023636065907	3.18123555114047e-50	9.5051462224985e-49
ARPC5L	718.216580367945	0.227190116685844	0.0421788134118579	5.38635628431342	7.19003699605698e-08	1.61728675216429e-07
ARPM1	15.087422509474	-0.0943972719357472	0.144604647855321	-0.652795559034816	0.513888087021564	0.596040058585181
ARPP19	5536.82035791599	-0.212992656942228	0.0430767293421491	-4.94449463074307	7.63416455228049e-07	1.60342661594388e-06
ARPP21	467.63328027662	-1.89090132151215	0.130255744567331	-14.5168363037894	9.47849621434198e-48	2.4888940791854e-46
ARR3	0.0404798062220262	0.0591512122858578	1.48431686391569	0.0398507985214251	0.968212077006693	0.999525589211984
ARRB1	371.152916784685	-0.963013738381463	0.0934673690278073	-10.3032079366111	6.81499865676896e-25	4.57737648199877e-24
ARRB2	1746.76472266052	-0.000894286183443012	0.054322244736442	-0.0164626146762135	0.986865327210178	0.999525589211984
ARRDC1	419.566668205243	-0.239830194715941	0.0405323709873622	-5.91700383850524	3.27859044958456e-09	8.0979213008276e-09
ARRDC2	815.472546102842	-0.920382732129519	0.101867591568793	-9.03508876528183	1.63869380733971e-19	7.81689450429104e-19
ARRDC3	1568.26824518288	0.952751659477358	0.0657047714546028	14.5004942317719	1.20280718602899e-47	3.12920286391711e-46
ARRDC4	1333.59498708016	0.172415990614767	0.105491789001769	1.63440199703007	0.102174469204065	0.133843532131272
ARRDC5	3.47649662770371	-0.253425111878423	0.140386374372912	-1.80519735629928	0.0710438045025256	0.0951884647907192
ARSA	582.584397143577	0.0939132198577165	0.0685836580461962	1.36932357551502	0.170898151750982	0.216296229544276
ARSB	491.288309721406	0.22247115920658	0.0439272860772953	5.06453230038195	4.09404220536981e-07	8.74981167117076e-07
ARSD	619.810028392912	1.15616279348261	0.107503739008737	10.7546286682053	5.63605589885825e-27	4.27802241437586e-26
ARSE	80.1217058080048	0.909462885528761	0.117702658579505	7.7267828654392	1.10298545919705e-14	3.88686083905752e-14
ARSF	85.6622886940211	1.13855355166485	0.221415447443938	5.14215952323348	2.71598348572656e-07	5.87271867747014e-07
ARSG	126.331954389131	-0.335503614801352	0.0906115621159394	-3.70265788346159	0.000213352503313682	0.000372097936264774
ARSH	0.00853349655768773	-0.0864335697061864	2.90469144273556	-0.0297565408960567	0.976261218745298	0.999525589211984
ARSI	137.059320872787	1.4927684903824	0.174616213382909	8.54885386335213	1.24316798799289e-17	5.28574228616208e-17
ARSJ	215.237728917146	1.50494601896891	0.163397990903928	9.2103092005199	3.25186844211984e-20	1.62018306413854e-19
ARSK	193.80586695731	0.550927420906541	0.0571574373639477	9.63877049627912	5.48408659005481e-22	3.06971863627252e-21
ART1	0.296375122304895	-1.28816707065039	0.384495399583599	-3.35027954052363	0.000807300436738227	0.00134130631160821
ART3	52.677115587681	0.654673916002336	0.173974328485407	3.76304896073935	0.000167854323692244	0.000295464363403647
ART4	0.141106414696094	-0.243189012949915	0.748965211277828	-0.324700011813639	0.745408125716424	0.826880139457045
ART5	2.09603999112317	-0.159986836511528	0.20844078487837	-0.767540942646535	0.442759960104776	0.521018403942366
ARTN	14.4480649870675	0.550931741505167	0.128258140997411	4.29549139899267	1.74306795654175e-05	3.31596566689207e-05
ARV1	412.187081180398	0.419186731337494	0.0443071538737344	9.46092661541932	3.05226244939454e-21	1.62064123591977e-20
ARVCF	875.685287352648	-0.77899071540231	0.0750354853550097	-10.3816309272437	3.00595490801004e-25	2.061106772808e-24
ARX	101.545846550274	0.799304933242613	0.172726032083221	4.62758811513427	3.69948847039477e-06	7.38773798847441e-06
AS3MT	236.783164877922	-0.236874067248061	0.0901340369974163	-2.62802017017002	0.00858834231585287	0.0128753314937372
ASAH1	4930.1329032746	-0.0745749831189667	0.0564537145650152	-1.32099337826711	0.186503572136209	0.234841353842413
ASAH2	3.73450490224887	0.235885862836622	0.164934450304041	1.43017945857757	0.152665519437076	0.194833292991142
ASAH2B	4.62055770089705	-1.37823775340931	0.2189135231118	-6.29580911136971	3.05800509318352e-10	8.10209061367446e-10
ASAM	27.1689899052108	2.02835394133338	0.194841352781259	10.4102846360882	2.22555227978621e-25	1.53872460651795e-24
ASAP1	1800.12289873066	-0.201449557603595	0.0552213769945805	-3.64803575295425	0.000264252872101864	0.000456950774977968
ASAP1IT1	0.0713621004649573	0.283643272260826	1.63285535090698	0.173709981170883	0.862093392948489	0.93409240159034
ASAP2	889.700289400316	-0.067105978309638	0.0593883006452999	-1.12995282876391	0.258496101605588	0.318099414893117
ASAP3	1438.35100120735	-0.333524038074026	0.0604910350799762	-5.51361102737072	3.51545090780733e-08	8.0911171687629e-08
ASB1	854.544667942617	-0.67412729489472	0.0521914068582841	-12.916442293368	3.63567079703386e-38	5.5577851253882e-37
ASB10	0.0587162653155524	-0.13977797823438	2.0216276150452	-0.0691413083171871	0.944877140401779	0.998595534740474
ASB11	0.113819737119037	0.177834285005905	1.19219356895249	0.149165613401317	0.881422952914711	0.95058942551981
ASB12	1.00424615165339	-0.276157831820372	0.287352498121038	-0.961042042878114	0.336531028873048	0.405523488504523
ASB13	666.822240076172	-0.936967884987818	0.0657894413380641	-14.241918854017	5.03259678958043e-46	1.19713882618246e-44
ASB14	9.82128367832698	-0.336892984972219	0.0682880541697815	-4.93341022918324	8.08061899133127e-07	1.69358918598207e-06
ASB15	0.0166940318202541	0.0302946961636582	2.90469144273556	0.0104295746246725	0.991678554293806	0.999525589211984
ASB16	15.0592081409692	0.419509632225088	0.0887580884012039	4.7264383424846	2.28492128718632e-06	4.64474258151884e-06
ASB17	0.0446104399993937	0.254785947279312	2.90469144273556	0.0877153227123367	0.930102940803226	0.988925031105908
ASB18	0.00827571380505212	-0.0221664990513089	2.90469144273556	-0.00763127495236918	0.993911182634744	0.999525589211984
ASB2	21.6737868876299	-0.244932311529818	0.165679284252115	-1.47835206215102	0.139313569386873	0.17892004916983
ASB3	819.832102278778	-0.380630468610859	0.0515926010731179	-7.37761734616604	1.61147322485037e-13	5.27615009032862e-13
ASB4	3.67703849245827	-1.11641303813857	0.20732859412419	-5.38475188554957	7.25446478713107e-08	1.63140660967299e-07
ASB5	31.0135284428902	0.758924471574975	0.224604512954484	3.37893687705541	0.00072766713839656	0.00121421526224236
ASB6	1010.42892542994	0.0329787486055943	0.0360002568777313	0.916069813546078	0.359630279219674	0.431040485395489
ASB7	360.812452342453	-0.0430587937285031	0.0320219547625727	-1.34466474791321	0.178733523651158	0.225619324439946
ASB8	797.416609984251	-0.0504611938003932	0.0303345270243691	-1.66349037714863	0.0962143154982441	0.126515056452982
ASB9	18.0210901043904	1.54716575102063	0.124828079956076	12.3943727370079	2.80330676076707e-35	3.5665296336985e-34
ASCC1	803.65233937521	-0.500949684618595	0.054827233572336	-9.13687691277857	6.42818748960034e-20	3.14394487338588e-19
ASCC2	1049.48640586519	-0.0941111949391195	0.0430515393642169	-2.1860123082461	0.0288147048535452	0.040663087141256
ASCC3	912.808844572676	-0.0827877068379039	0.058793651859886	-1.40810621927686	0.159099619725862	0.202405404927071
ASCL1	1290.92047089466	-0.630503071487409	0.120902724196687	-5.21496166175455	1.83855256785555e-07	4.02444851127889e-07
ASCL2	16.5946216770332	0.556258619326787	0.117437676590393	4.73662827362417	2.17303219844796e-06	4.42276756666257e-06
ASCL3	0.0110468041563795	-0.101080039961969	2.90469144273556	-0.034798890675553	0.972240105209903	0.999525589211984
ASCL4	0.487069908870695	-1.41911975589613	0.305280348543006	-4.64857879869791	3.34229936033618e-06	6.70227205469082e-06
ASF1A	702.21599053157	-0.221881522726605	0.051574742721451	-4.30213532862316	1.69159936784101e-05	3.22222435117697e-05
ASF1B	298.384410591649	1.79441927386933	0.137537626025822	13.0467518287137	6.63149645137638e-39	1.06492760603536e-37
ASFMR1	0.320647943466592	-0.310119441429115	0.325855996499099	-0.95170702629673	0.341245584973956	0.410702650942106
ASGR1	92.9016881042218	-0.718985632926652	0.0912050974129348	-7.88317378437102	3.1916868642464e-15	1.16361739624587e-14
ASGR2	10.9079386727403	0.319255071857438	0.155967122181998	2.04693827385556	0.0406641455433343	0.0562576785544095
ASH1L	2018.81621459211	-0.897059923536401	0.0566197419135126	-15.8435890595664	1.55676029571606e-56	6.67376370250448e-55
ASH2L	1040.86900688689	0.0520378846601871	0.0276742920240909	1.88036913879811	0.0600577865080234	0.0813308302388561
ASIP	10.6454430753977	0.477812184617169	0.152877814739313	3.12545142950881	0.00177532384917697	0.00285371587102786
ASL	459.071304799034	0.974569959520688	0.0686896023497985	14.1880273896148	1.08672793635858e-45	2.53913209774778e-44
ASMT	0.465620688791359	-0.765064415451477	0.299342655888554	-2.55581488438558	0.0105939461015946	0.0157278188002293
ASMTL	961.144969440396	-0.626645208575312	0.052627942745457	-11.9070815974354	1.08716046731684e-32	1.18511909427795e-31
ASNA1	2361.70821444649	0.695865358197946	0.0497458904256421	13.9883988856948	1.83496591968181e-44	4.03406108540973e-43
ASNS	1077.80130348153	0.502710247201012	0.0671092183244378	7.49092687640426	6.83889136777387e-14	2.29593016296392e-13
ASNSD1	1133.88964481488	0.246837769177846	0.0370889238357766	6.65529607358794	2.82730318784775e-11	8.02452775825528e-11
ASPA	110.458959019643	-0.9481847053981	0.134736382483669	-7.03733236650487	1.95955060041944e-12	6.00222706434783e-12
ASPDH	41.2612381782995	-1.01908688407077	0.154623045525881	-6.59078263919073	4.37514031913723e-11	1.22745436183506e-10
ASPG	0.213384333158362	-0.527600023063505	0.511157990867172	-1.0321662430992	0.301994245847292	0.366888031549322
ASPH	2878.08309513717	-0.0856255924998143	0.059376734495628	-1.44207311545769	0.149281748409738	0.190848368145221
ASPHD1	334.58864334692	-0.757176759732874	0.113100225738735	-6.69474136578626	2.16053405848416e-11	6.18280824746883e-11
ASPHD2	233.475045212121	0.231211065375338	0.0835970842030355	2.7657790648988	0.00567869937111534	0.00866011535058345
ASPM	246.634090882203	0.818821247985879	0.171181594758469	4.78334863710788	1.72398723546217e-06	3.53032484769616e-06
ASPN	63.7657885883311	1.87673254721693	0.170001928496608	11.0394779860064	2.4646081173594e-28	2.03782272848333e-27
ASPRV1	134.74328796769	-0.485527619181651	0.0663335541104433	-7.31948748552299	2.48919790853399e-13	8.05893658780008e-13
ASPSCR1	514.396785910857	-0.304677091118893	0.0518457886414485	-5.87660249950015	4.18772150048204e-09	1.02764892968524e-08
ASRGL1	963.034687354309	-0.681162069577698	0.0752834279780007	-9.04796829624639	1.45653048050883e-19	6.96816619981421e-19
ASS1	449.398094915053	1.031226552515	0.139457316421118	7.39456759228764	1.41869175794957e-13	4.65966047081371e-13
ASTE1	194.414234046606	0.42454475520966	0.0374059342404047	11.3496631973191	7.44489181334922e-30	6.72221916480067e-29
ASTL	0.140132546156748	0.0927960341317483	0.74972730260891	0.123773048959049	0.901494971511126	0.966535140444702
ASTN1	3516.31775601345	-0.568700334844027	0.0767204586288398	-7.41262949945724	1.23819448809366e-13	4.08314302762658e-13
ASTN2	1611.95930456321	-0.829172633776674	0.0861904429628245	-9.62023868625795	6.56785799447821e-22	3.65251437256374e-21
ASXL1	1639.01150847096	-0.18255237124573	0.0409810764724842	-4.45455285607981	8.40682170168586e-06	1.63946325115947e-05
ASXL2	355.845303952603	-0.509072993570431	0.0933410640398163	-5.45390176132208	4.92764319311855e-08	1.12183241478063e-07
ASXL3	115.033114996163	-1.81269039117082	0.12335028284547	-14.6954700820727	6.89185523391837e-49	1.93050263086463e-47
ASZ1	0	NA	NA	NA	NA	NA
ATAD1	869.24820309905	-0.619277964008216	0.0565806140903028	-10.9450555453472	7.01747021794069e-28	5.61397617435255e-27
ATAD2	650.585287853445	0.236206082031562	0.0828932031612415	2.84952291651827	0.00437848513678077	0.00675351794269196
ATAD2B	250.140198728382	-0.561868157436903	0.0554640727431306	-10.1303083175855	4.05369225037976e-24	2.59204964907551e-23
ATAD3A	686.397440401868	-0.610969771021643	0.0554684131293	-11.0147331887328	3.24496586196465e-28	2.66295159375543e-27
ATAD3B	278.101501522944	-0.577451495455944	0.083194720863432	-6.94096319409327	3.89435475848533e-12	1.1683656752979e-11
ATAD3C	50.7916972916259	0.69117379325802	0.146738906734996	4.71022858652103	2.47439113901403e-06	5.01129642203519e-06
ATAD5	74.2862046358443	0.286826786264379	0.100203803637147	2.86243411780076	0.00420400651207557	0.00649557380068403
ATCAY	2316.82507980292	-0.808664765522107	0.162670640794758	-4.97117833661455	6.65472007427661e-07	1.4036910885093e-06
ATE1	162.325160996973	-0.701288437310469	0.0802078818006668	-8.7433855821466	2.2622697267519e-18	1.00954874432106e-17
ATF1	248.555917647448	0.310362016362826	0.0425765832657851	7.28950029703854	3.11106748957932e-13	1.00098304608426e-12
ATF2	485.969384412574	-0.102588929653246	0.0605122055674556	-1.69534276087302	0.0900104174394862	0.118920369282237
ATF3	726.901630808587	1.17961999007741	0.126211455064834	9.34637818311696	9.07004331289123e-21	4.6846844979103e-20
ATF4	5132.81691635829	0.15689940441612	0.0512836384830601	3.059443695048	0.00221748465824656	0.00352481037083849
ATF5	738.803374583031	1.01458345546507	0.0780207411333265	13.0040222731451	1.16073949937186e-38	1.82825742233332e-37
ATF6	1051.5873949511	-0.0332622149867758	0.0464588227209979	-0.715950448992809	0.474021945883811	0.554299856073812
ATF6B	1741.45835337985	-0.157924966476036	0.0336590764334475	-4.69189838848649	2.70681564997241e-06	5.46350098438649e-06
ATF7	1136.07851023246	-0.0861408802052053	0.0454494497227808	-1.89531184053101	0.0580511004268279	0.0788136110442029
ATF7IP	946.46178507136	-0.674596046871083	0.0782857713425748	-8.61709650811363	6.86732506212467e-18	2.97634396099118e-17
ATF7IP2	33.2050038201164	-0.0822756628112878	0.105826175040498	-0.777460422998395	0.436887175633213	0.514906472835702
ATG10	89.9599143617704	0.704959008463631	0.0522291904736341	13.4974140336236	1.61961884175103e-41	3.01026235243452e-40
ATG12	637.144128364484	0.305790230669886	0.0359141694521977	8.51447312673895	1.67349425323027e-17	7.05005483309143e-17
ATG16L1	494.829886054392	0.29565768814547	0.0362270500776851	8.16124104809702	3.31599659057397e-16	1.28951790112638e-15
ATG16L2	401.488174026273	-0.49229706609793	0.082509594820296	-5.9665432507594	2.42332525081584e-09	6.04299114138701e-09
ATG2A	894.109213348916	-0.486194382992432	0.0432362688887499	-11.2450587316738	2.44933604800999e-29	2.13815435443812e-28
ATG2B	708.809028712079	-0.636863372540992	0.0505212223516861	-12.6058583481549	1.96026779139163e-36	2.68634335276184e-35
ATG3	1013.42092123739	0.321097472280098	0.0357258284342234	8.98782439352771	2.52172542204208e-19	1.18910629657269e-18
ATG4A	235.757434973762	0.586544251816925	0.0438464106176152	13.3772467017239	8.21338722686668e-41	1.47243632830737e-39
ATG4B	1426.5823358996	-0.0259087254433818	0.0426394052401584	-0.607623987657798	0.543436887579839	0.626370648376552
ATG4C	317.396913521416	0.122120728333167	0.0478422663149451	2.55256988724671	0.0106931454500736	0.0158655351949027
ATG4D	378.097064637929	0.195305150178341	0.0535901447538803	3.64442288923281	0.000267992466719912	0.00046325486007334
ATG5	640.777499592088	0.522668714273178	0.043654636107603	11.972811157671	4.93284803812687e-33	5.49270261501196e-32
ATG7	875.74279781283	0.19216648749234	0.0393354064382518	4.8853311785147	1.03255146752671e-06	2.14697542594123e-06
ATG9A	2110.31193215724	-0.244002442829769	0.0377932173366798	-6.45624956076325	1.07329563435886e-10	2.93393261845809e-10
ATG9B	51.6445356412783	1.18921189937302	0.160037795150061	7.43081906532106	1.07927260784462e-13	3.57341434296439e-13
ATHL1	336.485539293891	-0.0853535713216195	0.112386682702625	-0.759463392539708	0.447575404599205	0.52608851276726
ATIC	1356.92581987613	-0.158266280553526	0.0428010752764016	-3.6977173945157	0.000217546888854442	0.000379111404048214
ATL1	622.947232587032	-0.655377708999784	0.0716336779555165	-9.14901660370928	5.74541600191394e-20	2.82402066514949e-19
ATL2	492.841134097222	0.232828181531252	0.0437365167496709	5.32342762602383	1.01829978626607e-07	2.2682561600776e-07
ATL3	252.136982772681	0.405686144230949	0.0754481692476192	5.37701773650062	7.57297159577456e-08	1.70128730768597e-07
ATM	1198.51482285394	-0.782137247494445	0.050365809951328	-15.5291307386952	2.2034639864097e-54	8.35621342538446e-53
ATMIN	1594.49425429604	-0.364167427072521	0.0371137720080244	-9.8121911993689	9.97779828135049e-23	5.87525177988151e-22
ATN1	7723.66096426671	-0.648309841693412	0.0564852550972782	-11.4775057769838	1.71146673600408e-30	1.62260211701925e-29
ATOH1	0.109720916640863	0.0639458915127161	1.1016789459462	0.0580440351955665	0.953713552617855	0.999525589211984
ATOH7	8.61423647265281	-1.00567905325516	0.158398060486487	-6.34906166253822	2.16632195064747e-10	5.80906566042536e-10
ATOH8	782.47044135158	-1.61782295818535	0.113053588962376	-14.3102308651498	1.88885248395563e-46	4.60992215143627e-45
ATOX1	867.283994455875	0.189986466682175	0.0630046074120726	3.01543767171812	0.00256608673321885	0.00405377155964718
ATP10A	379.477199668435	-1.0967840010263	0.0969208574952069	-11.3162845374179	1.08994105774162e-29	9.74768147785248e-29
ATP10B	241.176742357181	-0.444023562587694	0.159113453364021	-2.79060980199992	0.00526088525265219	0.00804721200607363
ATP10D	467.385767970521	0.426367531645353	0.0649988423592491	6.55961731270253	5.39460399757633e-11	1.50341422883275e-10
ATP11A	1206.85556276425	-0.367435111913395	0.0677873968244371	-5.42040451656547	5.94643265651107e-08	1.34600151499539e-07
ATP11B	519.067567380855	0.0216391760065626	0.0536986574256101	0.402974246358763	0.686967170349873	0.769846712468006
ATP11C	256.672026251515	0.189743965501787	0.062525354792578	3.03467235222007	0.00240797126379879	0.00381192849980832
ATP12A	0.915578794672691	-0.405493310493521	0.380422446160558	-1.06590269471739	0.286467630738687	0.34959723238857
ATP13A1	1613.52606493193	0.133726541286277	0.0476990001182466	2.80355019926552	0.00505433633783068	0.00774267945172228
ATP13A2	1862.68015980124	-0.320962525410995	0.0486260126092574	-6.600634273473	4.09402390104398e-11	1.15137123971174e-10
ATP13A3	1203.94959104364	0.297499901417249	0.06054383635917	4.91379336539498	8.93308999290086e-07	1.86670058980614e-06
ATP13A4	667.264655025219	-0.59123217705213	0.112995876458248	-5.23233409557728	1.67382863599155e-07	3.67571277302376e-07
ATP13A5	43.5360193613113	-0.156671945612859	0.173107904767931	-0.90505367633496	0.365436951529539	0.437414570022197
ATP1A1	9427.83935686472	0.388238120732341	0.060253632115929	6.4433978019012	1.16827948537662e-10	3.18606990065371e-10
ATP1A2	19104.3677353732	-1.24298367031228	0.141889732333621	-8.76020871890638	1.9488917580006e-18	8.73457851540268e-18
ATP1A3	3973.97809451481	-1.34161621800909	0.15300221275056	-8.76860663575066	1.80890808298427e-18	8.12196434345395e-18
ATP1A4	6.02178324943128	-2.46796773849903	0.2593230570755	-9.51696222592541	1.78315339269851e-21	9.63391367233279e-21
ATP1B1	3107.00426998816	-0.425959918730631	0.102327247513531	-4.1627223352637	3.14475687268968e-05	5.86981595167444e-05
ATP1B2	15178.8295692577	-0.401793800997894	0.0900395458837806	-4.46241478734814	8.10411598120473e-06	1.58356289287909e-05
ATP1B3	2038.84905780785	0.647553027127847	0.0463743885835126	13.9635916916017	2.59994007599973e-44	5.66528378991322e-43
ATP1B4	1.35424945372216	-1.30725597284377	0.381148693842408	-3.42977949016474	0.000604071949939386	0.0010158010448371
ATP2A1	17.450536887759	0.00835145957286787	0.127682911990059	0.0654078094139809	0.947849306383471	0.999525589211984
ATP2A2	7297.38203343132	-0.140022196212795	0.0523234338477441	-2.67608958196905	0.00744867327845721	0.0112454323266863
ATP2A3	96.2088259404325	0.251062493558708	0.123157639790839	2.0385458343071	0.041495375878347	0.0573193769974352
ATP2B1	1520.26964171608	0.206211136839829	0.0852973962135494	2.41755488436671	0.0156251773993067	0.0227770918328154
ATP2B2	1261.16550962245	-1.12247639342268	0.114024904180553	-9.8441336258024	7.26625522160436e-23	4.32509969725439e-22
ATP2B3	125.727339450348	-1.71978009296548	0.209465377566912	-8.21033104822349	2.20579482617821e-16	8.68402355205317e-16
ATP2B4	5436.60929538536	-0.181796768378365	0.0896467060483221	-2.02792468783372	0.0425679350361708	0.0587226078288415
ATP2C1	2420.57770544257	-0.0632485302277793	0.0340833246070299	-1.85570307348286	0.0634958924940819	0.0856280516982353
ATP2C2	23.1813250201388	-0.717394122867742	0.156928248498478	-4.57147855616765	4.84294856318016e-06	9.6050433134781e-06
ATP4A	0.242137679930789	-0.627285981988866	0.691155035266426	-0.907590844284394	0.364094433391263	0.435993577026701
ATP4B	0.342661929711501	0.850431923712127	0.396267122285052	2.14610770332941	0.031864386832808	0.0447139904890753
ATP5A1	9847.51243325812	0.0483291734913373	0.0430080234402049	1.12372458963455	0.261129881388324	0.321080013778385
ATP5B	11117.115947417	0.287228029866795	0.0461347961224155	6.22584370167487	4.78971384627223e-10	1.25402492098365e-09
ATP5C1	2460.97588645814	0.091172788277003	0.0572637127847838	1.59215642582696	0.111349561248818	0.144995598773553
ATP5D	1518.15638036276	0.0474310760537021	0.0686011391248503	0.691403621846281	0.48931192865478	0.570329093057041
ATP5E	3468.23511970523	-0.00265422346175894	0.0588262687237485	-0.0451196977021155	0.964011900914244	0.999525589211984
ATP5EP2	115.808521863277	2.67897048944702	0.0715448917600875	37.4446088817976	7.35139688339691e-307	1.61077273933986e-303
ATP5F1	3352.90186962234	0.466699286593974	0.0454204862986711	10.2750834397744	9.12654292198217e-25	6.08436194798811e-24
ATP5G1	1037.00451377314	0.282378565973346	0.0611075397565317	4.62101022391697	3.8187595354548e-06	7.61743253481375e-06
ATP5G2	4042.35537355286	0.0718972244560574	0.0511038056991223	1.4068859152948	0.159461220724714	0.202797321855498
ATP5G3	2831.67250641132	0.743105426728353	0.0606303640941151	12.2563246622575	1.55389222049777e-34	1.89269639210723e-33
ATP5H	1832.01738464523	0.25257480231396	0.0517347407519462	4.88211207097735	1.04955574241641e-06	2.18072270998331e-06
ATP5I	1566.86149066994	0.156492778386439	0.0637485546846821	2.45484433585194	0.0140945606629999	0.0206604278803507
ATP5J	1800.05241885307	0.392398118916902	0.0516455983362299	7.59790052895235	3.00973525983201e-14	1.02987991191892e-13
ATP5J2	2447.43144942712	1.07339870632128	0.0698493654503009	15.3673365448827	2.71086424303453e-53	9.75515380887607e-52
ATP5L	2389.0305197121	0.304541202128851	0.0552019470182119	5.51685617227193	3.45117650434689e-08	7.9515364722188e-08
ATP5L2	0.21036536379035	-0.223748668914992	0.44560350175508	-0.502125023779487	0.61557957882843	0.698982512494768
ATP5O	3071.72368869601	0.461793254860672	0.0558950547957101	8.26179089632298	1.43502931330525e-16	5.71346215594174e-16
ATP5S	174.569432566062	-0.147621919960216	0.0523314790363668	-2.82090096971325	0.00478889838190376	0.00735262193173015
ATP5SL	831.72229293995	0.493279955577039	0.0433569160030497	11.3771919465476	5.43207261383235e-30	4.96157813546892e-29
ATP6AP1	4301.28773674751	0.349224672463691	0.0357046546333943	9.78092845455122	1.35957564797073e-22	7.92282262942756e-22
ATP6AP1L	65.1732113528477	-0.68041858773552	0.0703428314681262	-9.67289165838927	3.93110542424e-22	2.22315454447986e-21
ATP6AP2	4032.48465640411	0.452892863425582	0.0410799254514905	11.0246758836109	2.90563306126582e-28	2.38945304287581e-27
ATP6V0A1	3305.6127795725	-0.620548797628383	0.0496558617633098	-12.496989793195	7.75318377171936e-36	1.0261260669685e-34
ATP6V0A2	606.919734725957	0.177290232219132	0.0437423171203841	4.05305991749839	5.05520484027574e-05	9.28026805531908e-05
ATP6V0A4	9.00657539583954	0.975001979075273	0.331877889010518	2.93783349647729	0.00330514478834787	0.005160526937943
ATP6V0B	2951.65739459747	0.829525442800938	0.0608688517010649	13.6280777379348	2.72668132272e-42	5.29755228414171e-41
ATP6V0C	4225.18478745855	0.281270027317823	0.0500659789488564	5.617987168595	1.93194843117464e-08	4.53008597654742e-08
ATP6V0D1	2594.93940856245	-0.0896664807389972	0.0401317149381938	-2.23430473572064	0.025463028954419	0.0361844008777937
ATP6V0D2	5.5701849843596	2.58560051415475	0.296195217810454	8.7293796748919	2.56073225133415e-18	1.1388732520593e-17
ATP6V0E1	3139.74133046435	0.73828988948635	0.0569986644138196	12.9527577019392	2.26662815197085e-38	3.50846994951846e-37
ATP6V0E2	6699.10435276777	-0.112970153012918	0.0663757649183801	-1.70197892486562	0.0887593190687446	0.117346056049587
ATP6V1A	2235.93345853668	-0.267417456643825	0.0552205842405122	-4.8427132802343	1.28078039764803e-06	2.64249732596979e-06
ATP6V1B1	56.9224968095458	0.273865661919234	0.128749930722951	2.12711308178137	0.0334106885922123	0.0467417003680615
ATP6V1B2	3818.57358437562	0.109013698729581	0.0530658951876681	2.05430810776023	0.0399458805204462	0.0553144276289024
ATP6V1C1	1712.82245969691	-0.437861771222942	0.0468586546529547	-9.34430948702733	9.24910024243748e-21	4.77091961236901e-20
ATP6V1C2	60.9366823512817	1.6331118210732	0.0569326107765558	28.6849979088909	5.87068926715583e-181	6.09315749201647e-178
ATP6V1D	1470.59717142057	0.0203473174185841	0.0452209496096892	0.44995334229391	0.652744083651115	0.735759550134324
ATP6V1E1	2583.89164547663	-0.0323470489530937	0.0515988228159997	-0.626895095425773	0.530728002445246	0.613551190539351
ATP6V1E2	80.6399518921772	0.112299613478128	0.0681254183724533	1.64842456987444	0.0992655775849438	0.130257997735899
ATP6V1F	3025.57321062801	0.632872023559739	0.0591533290022735	10.6988403566504	1.03059880487142e-26	7.71579667124694e-26
ATP6V1G1	1906.02339836233	0.317435932562041	0.0435274353805926	7.29277821646195	3.03627695927574e-13	9.77397676084191e-13
ATP6V1G2	1467.6522190855	-1.45484717358395	0.110468336004308	-13.169811605809	1.30923955736177e-39	2.18983919178745e-38
ATP6V1G3	0.0411221105284562	0.219811817136021	2.90469144273556	0.0756747563276493	0.939677859922915	0.995243965716735
ATP6V1H	1299.01201397317	-0.243701451156796	0.0472888940491926	-5.15346057582324	2.55722855336603e-07	5.53916378211535e-07
ATP7A	246.538911173897	0.183155766879821	0.060321305692098	3.03633624601422	0.00239472146703608	0.00379217114991982
ATP7B	119.964639508857	-0.730316716601232	0.0736818316445857	-9.91176115333307	3.70064526170034e-23	2.24543767879171e-22
ATP8A1	1183.71648660131	-1.60140985495396	0.110859971646704	-14.4453388465355	2.68234879801711e-47	6.8164843166105e-46
ATP8A2	45.4060405135145	-1.7713573603838	0.227910259529516	-7.77217034476851	7.71525955130462e-15	2.75126434632418e-14
ATP8B1	59.9189727038931	1.07003052670062	0.119216162418192	8.97554916209365	2.81941772248322e-19	1.32599373926471e-18
ATP8B2	730.288070549766	-0.176283460422586	0.0533327470597583	-3.30535121742489	0.000948574513814257	0.00156573946701408
ATP8B3	30.7826213638441	0.448518395554332	0.0916915023695901	4.89160264542775	1.00018209644103e-06	2.08164548198598e-06
ATP8B4	162.154013173299	-0.204164927628238	0.100234171650842	-2.03687948197378	0.0416621207381321	0.0575299992896928
ATP8B5P	21.94473101023	-1.8490392509179	0.0742259841809754	-24.9109428634807	5.66279176241565e-137	3.85069839844264e-134
ATP9A	5010.61603667034	-1.30715759246547	0.0741844652429738	-17.620368202213	1.71882589956887e-69	1.47370637997818e-67
ATP9B	454.40527940687	0.00471012705478606	0.0425513038479228	0.110692896077167	0.911859879469824	0.974680298289605
ATPAF1	1860.04587167956	-0.163355620365376	0.0478841308873307	-3.4114771916764	0.000646119066008723	0.00108383278271326
ATPAF2	360.916265303114	0.0957766903659428	0.0349942467968191	2.73692675604748	0.00620160990640214	0.00941968322839483
ATPBD4	164.149779881752	0.489567609373366	0.0608735235151757	8.04237345077154	8.81148673075575e-16	3.32942169631162e-15
ATPIF1	1464.00314547784	0.00233467771133464	0.048948870808217	0.0476962526976765	0.961958320619861	0.999525589211984
ATR	461.668315277272	-0.0152945440953347	0.0438287901838424	-0.348961128773595	0.727118492067261	0.808932563756468
ATRIP	208.993845725607	0.147909206921443	0.046882075775742	3.15492017949374	0.0016054202110564	0.00259095560700813
ATRN	2166.68432979522	-0.414332479876971	0.0464023027929108	-8.92913616218785	4.29348153640746e-19	1.99695713451356e-18
ATRNL1	500.811532418499	-1.16727150527182	0.133602963631229	-8.73686835640661	2.39661495338774e-18	1.06829219893323e-17
ATRX	1265.78455797952	-0.0757000776911145	0.0737054751079567	-1.02706179670148	0.30439136628699	0.369549821041646
ATXN1	1231.52606652166	-0.343251115429437	0.045575947610528	-7.53140929427755	5.01955753090152e-14	1.69845014600854e-13
ATXN10	3070.57968693681	0.0536748859051715	0.0407710972232813	1.31649353489859	0.188008446940088	0.236585193903295
ATXN1L	1044.45801020304	-0.372222045576849	0.0480271272215232	-7.75024589457515	9.1714774366571e-15	3.25407583754728e-14
ATXN2	1038.32138369981	-0.22093995370281	0.0380872516807317	-5.80088990286961	6.59639017857387e-09	1.59745565911184e-08
ATXN2L	2556.01347842771	-0.0735403678994914	0.0440058759576979	-1.67114882499293	0.0946922854480898	0.124679967218824
ATXN3	245.344910717449	-0.327320739068173	0.0403729001529918	-8.10743686551628	5.16987150529207e-16	1.98693950661391e-15
ATXN3L	0	NA	NA	NA	NA	NA
ATXN7	395.572844647848	-0.324151229592743	0.0493709337902992	-6.56562889755257	5.18137100680121e-11	1.44541853521177e-10
ATXN7L1	162.680901464507	0.0661757400285043	0.0578396030360958	1.14412507269813	0.252571770958454	0.311411487013924
ATXN7L2	253.871694589548	-0.525351539670258	0.0771622757014464	-6.80839872715691	9.86910234635875e-12	2.88323997437325e-11
ATXN7L3	1304.84546657513	-0.320213728889257	0.0421892329165531	-7.58993958298824	3.20054685155791e-14	1.09403334915448e-13
ATXN7L3B	3025.93804123523	-0.350578256064155	0.0478133886015946	-7.3322194121264	2.26372073461491e-13	7.34703306231174e-13
ATXN8OS	0.0502146783751926	-0.113324189272121	1.65253732420237	-0.0685758727578632	0.945327224395007	0.998973949149002
AUH	187.225784697598	0.0028968076468563	0.0446184088776586	0.0649240463683767	0.948234474748402	0.999525589211984
AUP1	2528.85324834245	0.461806410388018	0.0406366375474158	11.3642869651597	6.29765886073943e-30	5.72039763858966e-29
AURKA	204.592292544274	1.59657707447711	0.109347169206333	14.6009913751351	2.76790914360027e-48	7.51834274267182e-47
AURKAIP1	1491.55151875905	0.055387080650967	0.0589043498705536	0.940288463800789	0.347069615369568	0.417153924845211
AURKAPS1	6.06707561855879	0.754705804768521	0.120144726712228	6.28163903170048	3.35021999883441e-10	8.85964038849598e-10
AURKB	182.0350481064	1.54371087028102	0.168362967538676	9.16894548040323	4.77668724652212e-20	2.35726407661202e-19
AURKC	24.8948253921997	0.396071620214214	0.130353303025323	3.03844713576051	0.00237800823319942	0.00376721741313405
AUTS2	1060.25856305959	-0.255455968621248	0.0697210619604399	-3.66397127981492	0.000248334643227036	0.000430519486983486
AVEN	163.808527088007	0.504327894523172	0.0522050043884067	9.66052776800779	4.43572824452919e-22	2.49993029385869e-21
AVIL	123.800734367076	1.29099624872494	0.139055789016508	9.28401656526271	1.63207345156249e-20	8.28429561513831e-20
AVL9	263.519691579514	-0.0941069829347493	0.0705504785921549	-1.33389574121491	0.182238027495947	0.2297049474094
AVP	0.179520353418239	-0.629239094498581	1.3708527397987	-0.459012902137817	0.64622490094502	0.729537156322178
AVPI1	141.954414160453	-0.605303779439658	0.0744867477708339	-8.12632847526029	4.42488914489257e-16	1.70627324867582e-15
AVPR1A	7.69777717848402	1.02912958092492	0.179145441697838	5.74465959709282	9.21060870186292e-09	2.20562481603809e-08
AVPR1B	0.134248951763587	0.154222990672878	0.839319383675732	0.183747681362333	0.854211401378941	0.927335471246503
AVPR2	0.900201388923878	-0.614126219165894	0.276464022000714	-2.22136035901376	0.0263265636945732	0.0373361982061836
AWAT1	0.0109911754117032	-0.00467943397965303	2.90469144273556	-0.00161099176002187	0.99871461510309	0.999525589211984
AWAT2	0.585660667375148	-1.49631471856192	0.468734202817162	-3.19224564704014	0.00141171217577726	0.00229108419935211
AXIN1	761.802305357162	-0.432099308624949	0.0456359184769046	-9.46840390302708	2.84152188652095e-21	1.51404516623056e-20
AXIN2	432.725341468906	-0.714313295111939	0.0700199103548997	-10.2015739736227	1.95084953585776e-24	1.27513267640421e-23
AXL	1519.34626912149	-0.153796408833336	0.0776237922248608	-1.98130501519197	0.0475570783074275	0.0651992202601828
AZGP1	601.231431692803	0.21197060289825	0.193512355601223	1.09538536823491	0.273347841564244	0.3350167455343
AZI1	380.33488796882	-0.792863352712045	0.0716984397445932	-11.0583069246194	1.99833950984949e-28	1.66135139689005e-27
AZI2	907.062114475229	0.243396326640856	0.0358385723866977	6.79146267364148	1.11002305770738e-11	3.23285403898827e-11
AZIN1	4411.85153228221	-0.171199835109958	0.0441598018734878	-3.87682525389093	0.00010582830800013	0.000189480137439855
AZU1	1.98965211940513	-0.760890113879337	0.286723417472179	-2.65374248321788	0.00796045522984552	0.0119841344478627
B2M	39602.9194063673	1.033327765873	0.0843822289910227	12.2457984131106	1.76927303050838e-34	2.14840296561732e-33
B3GALNT1	857.59398553926	0.729404338299244	0.0647652591419467	11.2622777699476	2.0148259638497e-29	1.76902796113607e-28
B3GALNT2	408.227783142722	0.455019640628617	0.0536147722539123	8.48683341362909	2.12343822304576e-17	8.87353290071252e-17
B3GALT1	41.5260642777595	0.317143204874946	0.127594512123412	2.48555521391232	0.0129349520027992	0.0190327752197583
B3GALT2	231.744636129531	-0.745288731435768	0.121315564710399	-6.14338921155665	8.07790207465889e-10	2.083120555934e-09
B3GALT4	138.823083534879	0.172966324792077	0.083062226498938	2.08237043578754	0.0373086467189972	0.0518482391330955
B3GALT5	11.1221475579307	-0.666535358577025	0.139283675706852	-4.7854521012202	1.70602870282698e-06	3.4960912417903e-06
B3GALT6	730.782502693264	0.0240983914187435	0.0549604612442754	0.438467779803313	0.661047221813127	0.74392804965787
B3GALTL	666.790169493627	0.0520348696031641	0.0800276214308816	0.650211372933352	0.515555695761659	0.597517385860706
B3GAT1	2943.22519940036	-0.614810216227379	0.0835881839139788	-7.35522878281558	1.90600382461386e-13	6.21057425997775e-13
B3GAT2	573.586136067181	-1.18078660950219	0.165327933384835	-7.14208776053384	9.19238739869547e-13	2.87690651487502e-12
B3GAT3	1173.26682476307	0.134952763070686	0.0498874544353146	2.70514430127256	0.00682747238250013	0.0103376652635418
B3GNT1	3165.013661686	-0.593176506351671	0.0555747420481361	-10.6734909509412	1.35440234225551e-26	1.00674007498224e-25
B3GNT2	277.552027867734	0.339577036110571	0.0588732712606191	5.76793218449401	8.02500838006677e-09	1.93038747566378e-08
B3GNT3	0.230482547947631	0.509204292560981	0.849676268705934	0.599292120205387	0.548978101587901	0.631871135429487
B3GNT4	11.1032879935766	-0.392608026874461	0.189165287963655	-2.07547606170691	0.0379424352152981	0.0526770502989072
B3GNT5	460.263988842543	0.997313836520498	0.107630836402049	9.26606045125474	1.9314833398482e-20	9.7538672117302e-20
B3GNT6	0.306320077741745	-0.736381291134372	0.338123077342877	-2.17784984367582	0.0294172176538939	0.0414658707744666
B3GNT7	196.375554429343	0.679090010428786	0.158545926083237	4.28323847357807	1.84192570054285e-05	3.49997830166748e-05
B3GNT8	11.3010239990379	1.17932448933813	0.135465440041193	8.7057222047152	3.15558880025123e-18	1.39681730956126e-17
B3GNT9	557.35100809138	0.340364510163552	0.0916583364442947	3.71340483983591	0.000204489376838773	0.00035714555940666
B3GNTL1	79.895019998603	0.0338652633747673	0.0621475193630095	0.54491737919509	0.585810342828396	0.668761141633436
B4GALNT1	676.658861273334	0.453865724193967	0.147483300165712	3.07740417853413	0.00208811960423417	0.00333045281425897
B4GALNT2	0.0859015830462055	-0.368000412397778	2.84787098478091	-0.129219481628339	0.897183981335524	0.963164214241118
B4GALNT3	30.9455108478408	0.32072939498208	0.16596661856053	1.93249339996106	0.0532986358963411	0.0726615347304422
B4GALNT4	1330.71839349669	-0.680455966024141	0.0868792266526005	-7.83220560589295	4.79384721357179e-15	1.73203860483026e-14
B4GALT1	730.427916529912	0.607437753299823	0.0982040765430529	6.18546372699223	6.19201725487917e-10	1.60814671758485e-09
B4GALT2	1633.71375068682	-0.0238904647161681	0.0472069705516374	-0.506079175109012	0.612801069156742	0.696268557488531
B4GALT3	754.872588984236	0.476892161973332	0.0408020098100795	11.6879576323106	1.46876195673782e-31	1.48153379983989e-30
B4GALT4	565.691846933726	0.125841676904587	0.04615172612652	2.72669491406681	0.00639721572775137	0.00970557733122457
B4GALT5	2690.84069461539	0.370224871455448	0.0634526919511753	5.83465980829187	5.39004256678307e-09	1.3130529884739e-08
B4GALT6	239.449939346464	-0.52068839711187	0.110961173651129	-4.6925278453611	2.69849791773754e-06	5.44782749158316e-06
B4GALT7	584.298867397884	0.334239471298753	0.0411006931475547	8.13221008460387	4.21533443388286e-16	1.62737656687882e-15
B9D1	235.596066357204	0.457349591189463	0.0733512396033953	6.23506287913222	4.51596659996458e-10	1.18392530379289e-09
B9D2	116.835334923096	0.540704843923289	0.0783388144957679	6.90213207084592	5.12277731873603e-12	1.52433793595625e-11
BAALC	12099.8428100044	0.208408432972457	0.0819946060652578	2.54173345020511	0.0110304257118056	0.0163438271122403
BAAT	8.32873718687112	-0.860462241541044	0.138112769816279	-6.23014253269738	4.66010997293267e-10	1.22106522277747e-09
BACE1	3123.30326163233	-0.303611194446843	0.0466285343361641	-6.51127466838195	7.45157451392892e-11	2.05978482498848e-10
BACE2	353.129790898025	1.44508059461651	0.107651852316927	13.4236482096211	4.39531539463408e-41	7.99590586551514e-40
BACH1	737.8097632348	0.0328979354811915	0.0521610559659561	0.630699184898845	0.528237232129839	0.610994088662117
BACH2	209.061900430952	-0.348876185539565	0.0852899324817798	-4.09047322923012	4.30493902021709e-05	7.95105343061543e-05
BAD	1429.59080659329	0.0299829176189513	0.0598138058549685	0.501270855288014	0.616180513773665	0.699624581507178
BAG1	1281.27430554646	-0.33057021465743	0.0542220074218747	-6.09660597929225	1.08344130338829e-09	2.76862284603046e-09
BAG2	139.886978769866	0.273470223425114	0.0772583961471762	3.53968289613671	0.000400608074022429	0.000683567640367077
BAG3	1552.38286781828	-0.75821308935056	0.0865049025727233	-8.76497246746382	1.86822311835841e-18	8.37874912304477e-18
BAG4	161.125394839835	0.150324259566002	0.0688088722953384	2.18466390381732	0.0289134986567691	0.0407879099729227
BAG5	1113.99591062525	0.0758171617102622	0.0413460747306584	1.83372090831257	0.0666954333356576	0.0897341847157786
BAGE	0.0579394696399794	0.277954201982714	2.90469144273556	0.0956914727303857	0.923765613595785	0.98383332793848
BAGE2	2.36437279497091	-3.92453386149704	0.217982802166794	-18.0038692157655	1.81672172946194e-72	1.90562513324412e-70
BAHCC1	812.833782437371	-0.677128082054246	0.0756708811146431	-8.94833087814032	3.60897861796516e-19	1.68687030922667e-18
BAHD1	771.950200273068	-0.461374421584874	0.0426133535047079	-10.8269916267891	2.56442450332343e-27	1.98662902671425e-26
BAI1	2107.42883720306	-1.08981044812836	0.158777833965214	-6.86374427029354	6.70786685882498e-12	1.98111628659621e-11
BAI2	3155.64189587152	-0.266904195478436	0.0729435702694572	-3.65905033839828	0.000253151615631647	0.000438369323872154
BAI3	725.132094941187	-1.03961021204307	0.0859420433237303	-12.0966429449091	1.10018962515644e-33	1.26653469982983e-32
BAIAP2	1387.16830931762	-0.504878831051364	0.0640341755297358	-7.88452145865316	3.15743149346816e-15	1.15176746302612e-14
BAIAP2L1	15.5650222959109	0.68964502285755	0.135456080030831	5.0912814153531	3.55651711225506e-07	7.64242317246048e-07
BAIAP2L2	28.1168102885141	-0.897265566940939	0.108251134343563	-8.28874055114505	1.14453895487464e-16	4.58466548651795e-16
BAIAP3	1547.52038861397	-1.10916787720314	0.135944787426817	-8.15895848746857	3.3792575357364e-16	1.31282424359184e-15
BAK1	295.039586942536	0.606434996458336	0.0448607939748337	13.5181512123601	1.22208536852805e-41	2.2951927111784e-40
BAMBI	395.91460442578	-0.378907466905573	0.111952315316257	-3.38454337308868	0.000712967536829167	0.00119119883303153
BANF1	2704.19642758652	0.265527182373561	0.0550548478256218	4.82295733909899	1.41445231719552e-06	2.91006778248259e-06
BANF2	0.130482591257828	0.218490761930092	0.788217186231327	0.277196140539327	0.781629502967606	0.86153562117943
BANK1	27.1203222857663	0.686179721005562	0.210484498747043	3.26000121191919	0.00111411737748042	0.00182554172695588
BANP	243.279746986026	-0.0776474984660298	0.0386343606452027	-2.00980415281368	0.044451921102818	0.0611846083721345
BAP1	2382.8860356745	-0.114490902236821	0.0376507277197416	-3.04086824268179	0.00235897034049382	0.00373825900952572
BARD1	126.206666764892	0.508901273945295	0.0983203742972213	5.17594931450213	2.26755015281592e-07	4.92956554002093e-07
BARHL1	5.21653856477891	0.9471995414027	0.275228852224673	3.44149798884271	0.000578502771885269	0.000973966930895374
BARHL2	0.501108182393654	0.275408103477974	0.617299043601788	0.446150218978205	0.655488739301425	0.738557761342938
BARX1	8.69568409379375	2.46177225133482	0.301510760651831	8.16479068943595	3.21993043032221e-16	1.25389075999119e-15
BARX2	6.77964899246186	-0.880974564126831	0.241476889721249	-3.64827692266448	0.000264004992661321	0.000456602214986953
BASE	0	NA	NA	NA	NA	NA
BASP1	1776.97365886192	-1.06653363100818	0.113395244925146	-9.40545286279166	5.18066250989986e-21	2.71492598180242e-20
BAT1	5237.74814636965	0.0566497996654636	0.0386302369998512	1.46646264856418	0.142522289715617	0.182751775355483
BAT2	7938.03679295963	-0.563631310189802	0.0491055025509644	-11.4779664377701	1.70237417879665e-30	1.61475799932035e-29
BAT2L1	6235.41572007806	-0.669157405026645	0.0602603442539273	-11.1044404626519	1.19362589984616e-28	1.00548068111774e-27
BAT2L2	2795.79005729837	-0.47710090876991	0.0495738351357627	-9.62404678724822	6.32909981325044e-22	3.52669817228874e-21
BAT3	4276.50378241834	-0.229907694582829	0.035377141779728	-6.49876397630776	8.09825966443489e-11	2.23197317376179e-10
BAT4	549.939924710739	-0.344398848407276	0.0493357234261819	-6.98071953728578	2.93672058512809e-12	8.87678263928969e-12
BAT5	1137.41718908315	0.110076381139464	0.0303965722317371	3.62134191645903	0.000293078869398337	0.000505644383598881
BATF	25.7037920265975	0.906102999992416	0.158453639663166	5.71841077250463	1.07524954151106e-08	2.56519730929083e-08
BATF2	168.184379185093	0.839791686074259	0.126322130753413	6.64801710567701	2.97067789387685e-11	8.42176079172677e-11
BATF3	125.318100504562	1.11388572550819	0.123797010423694	8.9976787136937	2.30540337447882e-19	1.08996774262101e-18
BAX	852.291872827568	0.369919260704558	0.058413697974215	6.33274854243688	2.40831892180459e-10	6.43175096668289e-10
BAZ1A	559.746590825961	-0.0300831569007181	0.0663565323065029	-0.453356374347036	0.650292144940007	0.733540847627098
BAZ1B	2557.29902293052	-0.0743337652911064	0.0480723438493585	-1.54628959894366	0.122034642782348	0.15798090695647
BAZ2A	1524.92042406501	-0.497530029672808	0.048610577056794	-10.2350159121032	1.38172466186397e-24	9.1281776656474e-24
BAZ2B	872.194297890903	-1.00228994971901	0.0587879234061225	-17.0492490914321	3.54052525070443e-65	2.41588781812773e-63
BBC3	125.395060121375	-0.0491380154018373	0.0746815972142201	-0.657966851738422	0.510559431596628	0.59249290832022
BBOX1	1193.16570747313	-0.0892166424642765	0.102425195558181	-0.871041953867673	0.383731246137099	0.457535532609202
BBS1	1233.20035022161	-0.427604264029642	0.0522151282280962	-8.18927920968994	2.62795244456063e-16	1.02905524636092e-15
BBS10	623.497654149056	-0.0420956967899103	0.052682709103484	-0.799041991314879	0.424266063881932	0.501500136651184
BBS12	157.125531047214	0.640736596523314	0.0598133742388137	10.7122630127015	8.91553562500613e-27	6.70535326182765e-26
BBS2	2463.70711436402	-0.510616876592069	0.0515277108897432	-9.90955871656447	3.78313382295456e-23	2.29407745967601e-22
BBS4	573.781160774481	0.40487350318317	0.0519461065231013	7.79410682113618	6.48656565374796e-15	2.32108645784631e-14
BBS5	330.131889319525	-0.152089521371776	0.0517129237674913	-2.94103505064986	0.00327117516698529	0.00510951083508515
BBS7	295.09746722693	0.0165528323797514	0.0406567900534866	0.4071357418521	0.683908293600226	0.766854582919
BBS9	456.17447043906	0.28329622564404	0.046539573082472	6.08721152516839	1.14894133851351e-09	2.93144303214988e-09
BBX	1734.74314190209	-0.537980108680424	0.0512542565725307	-10.4963010812404	8.98314965192585e-26	6.36077957400279e-25
BCAM	903.370991332169	0.416941494416471	0.0850414833707978	4.90280129050104	9.44795449608725e-07	1.96990550499937e-06
BCAN	53739.1017634746	-1.15204055504573	0.122658926022055	-9.39222763811399	5.87444531761305e-21	3.07115752023673e-20
BCAP29	1934.07355080845	0.529851645856568	0.0542763318076119	9.76211229113056	1.63709346761279e-22	9.48956001802593e-22
BCAP31	4009.63429297264	0.463727088214528	0.0412675427250693	11.2370899160134	2.68074070109537e-29	2.33808963403807e-28
BCAR1	1842.62220068997	-0.568126497979894	0.062876547510415	-9.03558672469712	1.63124967986079e-19	7.7870355088005e-19
BCAR3	396.160830099442	-0.258671839017131	0.0927853613719489	-2.78785182481741	0.00530588061007173	0.00811477940364624
BCAR4	0.123549337369377	0.198163281760629	0.617459400733746	0.320933297841356	0.748260939550627	0.829578103555314
BCAS1	2140.13194419806	-0.736495089369416	0.169919075464221	-4.33438733913365	1.46166619254928e-05	2.79519562811015e-05
BCAS2	826.779044707578	0.362859884187635	0.03636018601337	9.97959372524134	1.87231829895286e-23	1.15670792153354e-22
BCAS3	711.417863978896	-0.374616420088628	0.0411931055990302	-9.09415336962232	9.53262441437223e-20	4.60743513361324e-19
BCAS4	701.513823730938	0.656938312350449	0.0870984759622843	7.54247769656634	4.61125002731271e-14	1.5640497168663e-13
BCAT1	1601.62702590549	1.48197233568636	0.151974656862529	9.75144386755811	1.81862990968558e-22	1.04925049207137e-21
BCAT2	393.614669653626	0.172175297874497	0.0719080295685709	2.39438208649998	0.0166483955323016	0.0241917588900588
BCCIP	907.347079483326	-0.49443511539392	0.046897768191884	-10.5428282508225	5.48248582163036e-26	3.94434952216529e-25
BCDIN3D	217.346714300645	0.246115786678964	0.0409897681360845	6.00432248998991	1.92132484238337e-09	4.8191968827016e-09
BCHE	1557.33818208257	-0.225560680075816	0.089624307328489	-2.51673554640814	0.0118447696792085	0.0174926127517405
BCKDHA	1110.05877802759	-0.234189095832096	0.0532519036609117	-4.39776007489468	1.09373786990363e-05	2.11352384071529e-05
BCKDHB	648.610395900674	-0.0966813376507945	0.0684658645462575	-1.4121100827621	0.157917550392352	0.201038627239813
BCKDK	1102.18806626071	0.424063631882837	0.0386592121998674	10.9692776379	5.36996850818994e-28	4.33999094186499e-27
BCL10	269.815469209818	0.430217389746924	0.037784031317363	11.3862225587672	4.89764924095231e-30	4.49216944332928e-29
BCL11A	118.709411425271	-0.0435555959477463	0.157289643585531	-0.27691331072323	0.781846671640053	0.861630511050734
BCL11B	83.3389364373401	-1.02986275887479	0.134394936826149	-7.6629580190733	1.81698752351234e-14	6.30272541137436e-14
BCL2	612.731823644324	-0.833346513476244	0.0670362901751751	-12.4312743336273	1.76793328702021e-35	2.29792608294182e-34
BCL2A1	106.494167637657	1.41322273525537	0.167349065721086	8.44476023314485	3.0467013297475e-17	1.26459587923849e-16
BCL2L1	2800.60188411047	-0.000465086649566407	0.048804075620128	-0.00952966824300621	0.992396539923674	0.999525589211984
BCL2L10	0.4583649947176	-0.128214083254686	0.319439359241338	-0.401372215243583	0.688146102622441	0.771080239997417
BCL2L11	445.434898751023	-0.169668839877803	0.0612394133828108	-2.77058238323079	0.0055956142972518	0.00853935257249694
BCL2L12	118.524971094397	1.12376212436586	0.0821242755637616	13.6836777755606	1.27098087481229e-42	2.51139707928841e-41
BCL2L13	1269.08016986797	-0.182213061827504	0.0389337925629513	-4.68007480989393	2.86770257699487e-06	5.7770042719725e-06
BCL2L14	2.53290907409984	0.0143107018945849	0.19646646471652	0.0728404306314248	0.94193309739968	0.996401710155654
BCL2L15	11.9891209038951	0.0362310924224475	0.0942396977746491	0.384456797697773	0.700639910452678	0.78329945201694
BCL2L2	1231.31905577814	-0.96010705549674	0.0669658415756343	-14.3372655805774	1.28000194339175e-46	3.15126570832526e-45
BCL3	289.065637885821	1.62340941483866	0.100899927635179	16.0893020727267	3.03236387136301e-58	1.4271650487656e-56
BCL6	2509.03641964997	-0.511468371601212	0.0732161188528644	-6.98573455701828	2.83369398816415e-12	8.5771980731538e-12
BCL6B	179.823073619976	0.521333244964859	0.0957619705671104	5.44405301893309	5.20817070955027e-08	1.18392076532947e-07
BCL7A	843.124790025404	-1.02229239195673	0.0973182025923188	-10.5046370023836	8.22385769606162e-26	5.84201994835501e-25
BCL7B	1306.13333460026	0.619829590518438	0.0422993228264873	14.6534163929998	1.28108766367483e-48	3.53824211872096e-47
BCL7C	712.759719694736	0.31790839079641	0.0681061370283262	4.66783765263603	3.04386260690938e-06	6.12374725650408e-06
BCL8	2.16067593858222	-0.0905262112003333	0.222012387962988	-0.407752972845033	0.683455042391441	0.766433519247041
BCL9	818.649836907198	-0.213996708569637	0.0530654799397786	-4.0326914749945	5.51416534911075e-05	0.000100908816522331
BCL9L	1245.41679120978	-0.462682465895155	0.0608060700199868	-7.60914931261093	2.75905861007361e-14	9.45743712682974e-14
BCLAF1	2731.55141282831	-0.332131226844988	0.0396325321820055	-8.38026763770058	5.28074862953734e-17	2.16229989564943e-16
BCMO1	58.1446817192569	0.294887123914093	0.132643409261684	2.22315700083017	0.0262052151545908	0.0371854963552227
BCO2	55.0733969557399	-0.58833655118949	0.129476256022349	-4.54397253414507	5.52038539981453e-06	1.09123897438194e-05
BCOR	585.531592796629	-0.335453481865057	0.0772069319725735	-4.34486222019833	1.39363106633458e-05	2.66923121873718e-05
BCORL1	327.958004401583	-0.177799133880414	0.0628639201108537	-2.82831763540811	0.00467933528033413	0.00719336542938798
BCORL2	1.03745693285175	-0.883883682994447	0.299625614542106	-2.94996035083721	0.00317814712139411	0.00497168500982801
BCR	3291.01721509836	-1.34609324871343	0.0804878564782832	-16.7241781258844	8.73731708047901e-63	5.11275646371057e-61
BCS1L	453.175466154966	0.0806123427120627	0.041893236467653	1.9242328716786	0.0543254005310113	0.0739948127138792
BCYRN1	0	NA	NA	NA	NA	NA
BDH1	327.247803021139	0.332666758454402	0.106521447312527	3.12300261447238	0.00179016157711063	0.00287592556420543
BDH2	1089.08520608181	-0.429137229223157	0.0724915275585649	-5.91982599451313	3.22282417161511e-09	7.96916522435737e-09
BDKRB1	4.01245860308569	2.24111259071682	0.26787376208553	8.36630125051685	5.94550738615994e-17	2.42442939733404e-16
BDKRB2	108.902837319267	2.09056899113851	0.17471229559118	11.9657805654982	5.36902974902939e-33	5.96827884164935e-32
BDNF	70.9772770762893	-0.0533917685861094	0.201601370529638	-0.264838321514586	0.791134014309531	0.869872470710006
BDNFOS	241.679695245083	-0.289549231029648	0.0682944935331527	-4.239715620544	2.23803130558189e-05	4.22536882202728e-05
BDP1	606.618735986553	-0.691775239588112	0.0517099384923807	-13.3779938587636	8.13125261334999e-41	1.45903823053013e-39
BEAN	64.7861687022446	0.754499007327495	0.149595369141958	5.04359868661118	4.56856970182879e-07	9.73128046230976e-07
BECN1	1312.90989599167	-0.149915890890433	0.0283561850637789	-5.2868850500602	1.24416766700231e-07	2.75643033291602e-07
BEGAIN	161.239683049703	-0.153729333374069	0.13888353688727	-1.10689385379672	0.268339823520342	0.329124351276349
BEND2	0.147087438886358	0.130611032292554	0.732232433399815	0.17837373262219	0.85842947681133	0.9308385176905
BEND3	128.415511161899	0.0549803362771406	0.065351248386365	0.841305065085976	0.400177053826047	0.475448337236393
BEND4	20.6865582669258	-0.988844656432731	0.224149938772119	-4.41153212822439	1.02641720103707e-05	1.98752427380705e-05
BEND5	267.020499820089	0.176694179820804	0.0602708219602785	2.931670318637	0.00337144440553552	0.00525738444386846
BEND6	472.391477633361	-0.0199165823626825	0.063599899048719	-0.313154307798915	0.754163430804139	0.835370603575668
BEND7	280.109754845205	-1.13117128793567	0.0730390118109251	-15.4872205947133	4.2319419303324e-54	1.58056619064687e-52
BEST1	355.137968724603	-0.58890300113721	0.101456051046669	-5.80451333421521	6.45532235645772e-09	1.56386924900917e-08
BEST2	0.542304870606085	0.974865741897142	0.27736034271487	3.51479859144577	0.000440087621030494	0.000748148955751839
BEST3	490.289088606454	-0.834463179949592	0.140508405856149	-5.93888440243146	2.86968112820867e-09	7.12452623042615e-09
BEST4	27.4475548795145	1.55760610895152	0.158595722840799	9.82123654441215	9.12176819248879e-23	5.3888936116201e-22
BET1	479.211152422238	0.900912677489352	0.0666823034848531	13.510521238877	1.35558257811714e-41	2.53384724554218e-40
BET1L	1053.12675281665	0.342470365187995	0.0401522503056101	8.52929443758088	1.47242987185256e-17	6.22829624044024e-17
BET3L	0.277165313759277	0.50263631555724	0.392695244173853	1.27996537522291	0.200557313534885	0.251174280636855
BEX1	2318.30661172497	-0.496969359405564	0.101939931035563	-4.87511963523097	1.0874253277484e-06	2.25655345293049e-06
BEX2	795.518468911486	-0.359323117373478	0.11252197097013	-3.19335961035434	0.00140627698675776	0.0022828269821257
BEX4	2151.03995391479	-0.81224903339105	0.0630996750873786	-12.8724756865431	6.4307369259262e-38	9.62901535150073e-37
BEX5	151.790989984365	-0.310787600266913	0.152269624466058	-2.04103478521542	0.0412473696678878	0.0570094568683915
BEYLA	0	NA	NA	NA	NA	NA
BFAR	935.429401250719	0.481855877050791	0.0310822446581329	15.5026087192422	3.33088586454069e-54	1.25114417616652e-52
BFSP1	18.830172319909	0.364315324479372	0.133300872934783	2.7330302979907	0.00627545593300587	0.00952744560773545
BFSP2	0.311879771559836	0.876754531738435	0.467444700564989	1.87563262708663	0.0607057430110647	0.0821631607534795
BGLAP	61.8492307124697	0.0448480327469901	0.0750782725877412	0.597350354519383	0.550273491967978	0.633140396849789
BGN	4487.76590358694	1.52697305329467	0.122062407055207	12.509773403076	6.60122662198718e-36	8.76607333236277e-35
BHLHA15	1.17812422317391	0.701659376388374	0.252017756460474	2.78416642637806	0.00536654901031946	0.00820247608769956
BHLHB9	299.190356133204	0.106130374694606	0.06458451542845	1.64327894992388	0.100325231524343	0.131543455163566
BHLHE22	25.2767246174172	0.187643774148284	0.239928672763237	0.782081491083194	0.434166683510408	0.511853111665286
BHLHE23	0.0276387401466063	-0.124691790841787	2.90469144273556	-0.0429277234088437	0.965759149030919	0.999525589211984
BHLHE40	1782.41029233798	0.719998287126487	0.109789467218685	6.55799053740151	5.45376689142042e-11	1.51882902272011e-10
BHLHE41	2156.11896738583	-0.448568736474878	0.0890807877218865	-5.03552727750148	4.76535259893471e-07	1.01405798263723e-06
BHMT	2.25604947993291	-0.742893489586857	0.24971299667693	-2.97498928559168	0.00292998781397346	0.0045984369034267
BHMT2	44.4666105624152	-0.274292681593301	0.166786069748912	-1.64457788355008	0.100056890844504	0.131235243595186
BICC1	36.863800188802	0.997674147397506	0.161803178775648	6.16597371539192	7.00507210230546e-10	1.81191004534973e-09
BICD1	290.090307873561	0.499295814525146	0.0900180177980222	5.54662085145488	2.91243347151857e-08	6.73703085728402e-08
BICD2	1025.85508130932	-0.378959209142332	0.0492007162653113	-7.7023108179731	1.33627367502279e-14	4.68551153475274e-14
BID	1069.04177450051	-0.187467171387044	0.0710844892998399	-2.63724440076221	0.00835825879921537	0.0125504350506759
BIK	2.88141145045322	0.735797755248434	0.186308480050422	3.94935192992451	7.83630674373381e-05	0.000141733439407897
BIN1	3157.07185753613	-0.963736544070218	0.0808632133795765	-11.918108417809	9.52465055655287e-33	1.04405841564882e-31
BIN2	274.171382844414	-0.0101688058823229	0.0915953341759867	-0.111018819613509	0.911601423090297	0.97445685512471
BIN3	373.003642033931	0.136598379357507	0.0434945682997073	3.14058478328262	0.00168610895616395	0.00271606507233729
BIRC2	1247.73234763466	0.210325329703632	0.0372360057113059	5.64843961337591	1.61910704949611e-08	3.81831990146654e-08
BIRC3	130.200728998643	1.83947927147981	0.155125478041927	11.8580087210603	1.95570979983811e-32	2.09033047440691e-31
BIRC5	376.94954877609	1.9256754327138	0.165960567031301	11.6032107334907	3.96902558968533e-31	3.88818602228489e-30
BIRC6	1423.91803522471	-0.697445080946678	0.0546411964188458	-12.7640887582419	2.60177539265408e-37	3.73957804250281e-36
BIRC7	11.3567709862132	-0.282424950487223	0.184800722617195	-1.52826756566451	0.126446119350348	0.163423612110949
BIRC8	0.00307785494354661	-0.0571406291946211	2.90469144273556	-0.0196718413370639	0.984305153789895	0.999525589211984
BIVM	659.191371875777	-0.301875022213825	0.0571397970193229	-5.28309580994381	1.27018918964578e-07	2.81123802691523e-07
BLCAP	2219.56317100169	-0.231037613168089	0.0443048605514568	-5.21472385405109	1.84091270319514e-07	4.02916742586107e-07
BLID	0.0482202747683638	0.208013355320081	1.6579462027967	0.125464478261837	0.900155845025941	0.965364294061308
BLK	1.43001265400603	0.124038424849112	0.353650918217329	0.350736894659742	0.725785743793378	0.807748454630928
BLM	390.860058160462	0.536981795907223	0.127052923798464	4.22644186259738	2.37415574995486e-05	4.47166679934191e-05
BLMH	859.290180294667	0.0978772823751415	0.0386350942978214	2.53337759759682	0.0112969187008849	0.0167173372941206
BLNK	164.193765576638	-0.315569477433934	0.109703732047823	-2.8765610024677	0.00402034478045175	0.0062230140557699
BLOC1S1	1779.93411561431	0.485028707940968	0.071080595473422	6.82364440970851	8.87594281696661e-12	2.60156944635228e-11
BLOC1S2	950.669137263466	-0.117046406526637	0.0513682924447334	-2.2785730448908	0.0226924577929953	0.0324812496641599
BLOC1S3	307.735432747595	-0.0110976918983338	0.0401059004947971	-0.276709705091238	0.78200301917017	0.861686899209711
BLVRA	870.104101184452	0.336429710631661	0.0503262513166529	6.68497457747935	2.30964735704171e-11	6.58944529526366e-11
BLVRB	714.90067237377	0.300411360336821	0.0794859072031802	3.77942922094248	0.000157188265540026	0.00027740760662693
BLZF1	340.35886741984	0.324623911165483	0.0426829745204729	7.60546599229577	2.83879147373579e-14	9.72398260588322e-14
BMF	309.304433964384	0.0277283428119191	0.095395954502763	0.290665814461933	0.771306919346527	0.851728774191596
BMI1	1490.60919816652	-0.100742835583271	0.0470709916182229	-2.14023185235533	0.0323360342189871	0.0453435678588086
BMP1	928.810980062295	0.840733002031528	0.0747102037732069	11.253255373037	2.23199124475161e-29	1.95361151116297e-28
BMP10	0	NA	NA	NA	NA	NA
BMP15	0.0301065493514977	-0.0750666208335105	1.95104226706884	-0.0384751381866716	0.96930885365564	0.999525589211984
BMP2	658.627386116591	-1.60129803182014	0.134480621392427	-11.90727716187	1.08461425702623e-32	1.18299740865914e-31
BMP2K	472.305537285604	-0.276300083621108	0.0810393300456178	-3.40945666092718	0.00065092419376913	0.00109142293181934
BMP3	2.41956384301937	-1.04641445114981	0.309449294956679	-3.38153768066041	0.000720813461302933	0.00120369560986484
BMP4	100.509703616825	-0.452555694084909	0.106133220473413	-4.26403431523383	2.00768590671352e-05	3.80432075337663e-05
BMP5	5.09983726909652	2.57152669607114	0.529556658750118	4.85599917134564	1.19781201927212e-06	2.47675925553593e-06
BMP6	93.9953349417072	-0.551557973651091	0.124229032287276	-4.43984762253988	9.00225945574206e-06	1.75108065167916e-05
BMP7	2277.91208260717	-0.166008458889759	0.0833359857776799	-1.99203810143471	0.0463668775525058	0.063682562010249
BMP8A	156.304084720311	-0.177659130947986	0.0986150100080767	-1.80154249270405	0.0716174160438862	0.0958700272650909
BMP8B	170.284748845044	-0.120693597689539	0.139332094930958	-0.86622969208455	0.386364213573098	0.460452184182117
BMPER	212.968735648749	0.995049908618823	0.139923659478976	7.11137710608784	1.14890738702783e-12	3.57357313441464e-12
BMPR1A	650.135651097644	-0.505012464162271	0.0592000128681639	-8.53061409440762	1.45572881055094e-17	6.1629394899237e-17
BMPR1B	884.903430691764	-0.881677433652757	0.0899405827262827	-9.80288771683831	1.09412118091726e-22	6.42718787241241e-22
BMPR2	2259.23001821942	-0.626140251724644	0.045180444583423	-13.8586562725941	1.12765495754183e-43	2.36567614497073e-42
BMS1	698.091283674712	-0.572588731344356	0.0441030525997064	-12.9829727783552	1.52831407549506e-38	2.38625127226941e-37
BMS1P4	13.8331439097987	-0.278880380921225	0.101342009096141	-2.75187341763332	0.00592554202670295	0.0090177256340934
BMS1P5	45.1120301430656	-0.986125392895492	0.0896203636328875	-11.0033629961039	3.68141154985012e-28	3.01609620951576e-27
BMX	2.23682190336695	-0.698533158148889	0.224204255959189	-3.11561060765965	0.00183564492103607	0.00294563575903908
BNC1	1.75971081070952	0.479925718711637	0.30953138958778	1.55049127440929	0.121023646190179	0.156754436970136
BNC2	106.199633827634	0.776602763293589	0.143168185846646	5.42440877280826	5.81466775144329e-08	1.31738566243637e-07
BNIP1	271.997776631463	0.67857969870067	0.053696645813752	12.6372828026231	1.31520914524335e-36	1.81370100309083e-35
BNIP2	539.806145019507	0.101280280775611	0.0411949370054537	2.45856137035003	0.0139494932512025	0.0204523425214657
BNIP3	1631.55138912668	0.253751565708696	0.0767605734306099	3.30575390943481	0.00094721239441844	0.00156362200049654
BNIP3L	3745.76234892894	0.3163202085237	0.0456351630036716	6.9315016689707	4.1639654131207e-12	1.24735527793924e-11
BNIPL	6.5970803431185	-0.0282566756465385	0.109924213093677	-0.257055973850441	0.797135563520338	0.875690118245283
BOC	962.547745077315	-0.0531559729349314	0.0850047420518306	-0.625329501059131	0.531754821594346	0.614594132097088
BOD1	1040.10029514918	0.848424909343966	0.0467072833036832	18.1647239859284	9.81996193704439e-74	1.11936213525153e-71
BOD1L	1087.87724351827	-0.818624184433432	0.0534244592147642	-15.3230223846084	5.36630740188849e-53	1.90330183390721e-51
BOK	578.12609941413	-0.910045558662162	0.140023041954092	-6.4992557364989	8.07183450853879e-11	2.22531212789578e-10
BOLA1	294.757701874886	-0.00608607560312421	0.0598429382351164	-0.101700815210855	0.918994155058224	0.980446047270514
BOLA2	902.620827810542	0.515240033905138	0.0550476017146357	9.35989975687078	7.9812378219638e-21	4.13531292299333e-20
BOLA3	240.426384850345	0.900792583449879	0.0576478865246155	15.6257694384901	4.86019016587404e-55	1.92842957889409e-53
BOLL	0.048770279020881	0.0473449307532721	1.55817481410735	0.0303848646022398	0.975760115580969	0.999525589211984
BOP1	448.107672687187	-0.621821015549053	0.0961131376496791	-6.46967761905262	9.821222424605e-11	2.69067110604627e-10
BPESC1	0	NA	NA	NA	NA	NA
BPGM	843.755740689281	0.373106399277728	0.0479377834208936	7.78313832331075	7.07472072818203e-15	2.52696056438597e-14
BPHL	370.650361172879	0.407565374310748	0.0521158685532605	7.82036998758317	5.26683039495709e-15	1.89702092033888e-14
BPI	2.55909880624706	0.85858979369494	0.286471092656375	2.99712541929956	0.00272538562019971	0.00429167167853855
BPIL1	8.96148465933032	1.07415975802418	0.307972719090948	3.48784061521686	0.000486938255959193	0.000824879512714997
BPIL2	0.33028167413401	1.2527458554513	0.549908475681543	2.27809883071666	0.0227206899155603	0.0325146592986103
BPIL3	0.0473801708510204	-0.066545989127999	2.22123045935163	-0.0299590656376211	0.976099699393463	0.999525589211984
BPNT1	596.329962147873	0.291460102575745	0.0404756787983174	7.20087003427504	5.9829555151083e-13	1.89441044890712e-12
BPTF	1770.58066015148	-0.800766512009361	0.0537470951748365	-14.8987867977704	3.35618226757534e-50	1.00126950554593e-48
BPY2	0	NA	NA	NA	NA	NA
BRAF	106.590021952024	-0.0240664740237757	0.0697852106060634	-0.34486496228593	0.730195892530342	0.812152453508084
BRAP	633.178768594351	-0.165636481637453	0.0278242844743321	-5.95294667110857	2.63357132406016e-09	6.55070970111836e-09
BRCA1	314.68246156907	0.39736718415427	0.0770067212779215	5.16016235414243	2.46735777331124e-07	5.34919693158506e-07
BRCA2	69.9537145384429	0.482014269609468	0.132826254548767	3.62890808934537	0.000284622544921529	0.000491355737183976
BRCC3	331.664994786688	0.219943089614181	0.0374183791557052	5.87794272699399	4.15396578736486e-09	1.01961918504898e-08
BRD1	692.117009176391	-0.577542775802282	0.0506194825937579	-11.4094958345841	3.74895904190221e-30	3.47576268482894e-29
BRD2	4410.24640017671	-0.170147320941296	0.032009414127672	-5.31553999278619	1.06341489425481e-07	2.36634413390937e-07
BRD3	1352.81285003811	-0.83117163856747	0.0628359583360147	-13.2276432249635	6.07629478366538e-40	1.03654440427233e-38
BRD4	1707.48805703446	-0.0618214183502283	0.0478048764054982	-1.29320318341244	0.195940794939017	0.245908004594757
BRD7	1280.04357171506	-0.873317576524639	0.0367598577594716	-23.7573709408497	9.21978252591038e-125	5.50951852760463e-122
BRD7P3	0.681778370505789	-0.205390146877152	0.237576750539243	-0.864521239603474	0.387301617735922	0.461402035990599
BRD8	1412.11359995569	-0.129650379828721	0.0400769729502725	-3.23503424247113	0.00121628143087182	0.00198584780731846
BRD9	836.065890169088	-0.353937417631478	0.035648630334089	-9.92849975761975	3.12928139988568e-23	1.90755577142954e-22
BRDT	0.0625003983940687	-0.0755092352186201	1.63602006589733	-0.0461542231618074	0.963187328188253	0.999525589211984
BRE	627.589854286796	0.229546666955403	0.0324389699857968	7.07626250327642	1.48094215798836e-12	4.57749773549582e-12
BREA2	6.05883718439858	-1.21412857926453	0.118082055485558	-10.282075242271	8.48799873508753e-25	5.66441066179107e-24
BRF1	1014.57451707446	-0.495621343996064	0.0494030195625473	-10.03220751251	1.10028686465207e-23	6.87287202120333e-23
BRF2	393.715431185519	0.310517412950105	0.0411878731890902	7.53904945575957	4.73409422842317e-14	1.60378522907585e-13
BRI3	1444.10641656741	0.784846013653046	0.0597630361561846	13.1326328803298	2.14081670478345e-39	3.53871797303685e-38
BRI3BP	65.4557058529178	0.312937956398317	0.0653806425527092	4.78640074768353	1.69798849388406e-06	3.48069990638187e-06
BRIP1	61.0378396176187	1.00515499443599	0.163437928784064	6.15007178513629	7.74478856987138e-10	2.00009469090969e-09
BRIX1	497.611903985431	0.359074497289394	0.0412625937114304	8.70217950428852	3.25570068877317e-18	1.43919340019294e-17
BRMS1	759.45692649738	0.039892903256649	0.0452391807933144	0.881821963994194	0.377873092117833	0.451041545703267
BRMS1L	389.148259536843	-0.160310452859449	0.0508968572903817	-3.14971221002566	0.00163431367397179	0.00263564488475006
BRP44	924.090588181948	0.499844718143204	0.0492540495473104	10.1482968961381	3.37196376366497e-24	2.16737696934398e-23
BRP44L	1304.20179972832	0.0278208979217947	0.0670243843766633	0.415086213480857	0.678078791509467	0.761357044272999
BRPF1	550.603178738342	-0.207985803058623	0.0410132845121149	-5.07118133874859	3.95353825121271e-07	8.46696072045119e-07
BRPF3	873.223301656026	-0.263306921712933	0.0631046266919818	-4.17254542995957	3.01215515264864e-05	5.63297293601054e-05
BRS3	0.296033397048277	0.939685334389231	0.573322991417528	1.63901561328612	0.101210008059806	0.132659445592514
BRSK1	1048.01303980337	-0.52031825699503	0.0812274051341698	-6.40569837403496	1.4968262347728e-10	4.05626128208322e-10
BRSK2	552.949979102688	-0.845506501283809	0.118315898205558	-7.14617827449408	8.9227165650098e-13	2.79650303022876e-12
BRWD1	1402.43573966323	-0.66581358937401	0.0428209775595299	-15.5487713574122	1.62187412351673e-54	6.19832513871122e-53
BRWD3	143.347027886058	-0.832019458760243	0.0999305090269738	-8.32598039239107	8.36336480083796e-17	3.38125341099574e-16
BSCL2	2254.15931002889	-0.209272906144229	0.0901577062572867	-2.32118711568613	0.0202767472571403	0.029188806183722
BSDC1	2366.6406541681	-0.370119479393063	0.0298279446109209	-12.4084808464325	2.35070606204635e-35	3.0120808020503e-34
BSG	12371.7041232856	0.280736335833458	0.048621756320026	5.77388307377598	7.7465202647944e-09	1.86499059482048e-08
BSN	857.375478625043	-1.29627473028622	0.130625394313216	-9.92360434279716	3.28668410682202e-23	2.00164949309852e-22
BSND	0.152266134310058	0.761481079286488	0.963643129401947	0.79021066622358	0.429404747898378	0.506845132492728
BSPH1	0.00583273806377784	-0.0717870994504039	2.90469144273556	-0.0247141911165603	0.980282935664165	0.999525589211984
BSPRY	19.5221125968655	-1.23172427300147	0.160245311813915	-7.68649178599255	1.51224390218971e-14	5.28000172648389e-14
BST1	71.8951787091561	1.26172013709413	0.11056935703165	11.4111194183119	3.67963086298275e-30	3.41309128024553e-29
BST2	1629.15965739354	0.906864222754636	0.124285505476678	7.2966209476841	2.95084593178768e-13	9.50672794884056e-13
BSX	0.00264941300499415	-0.0250070938671827	2.90469144273556	-0.00860920836522028	0.993130930418914	0.999525589211984
BTAF1	641.577872694962	-0.836107904246437	0.0677270627263936	-12.3452556568735	5.16698478839496e-35	6.46939301759674e-34
BTBD1	2204.88541871184	-0.0618767819729076	0.0352859215935676	-1.75358270886674	0.0795020359873487	0.105773859780766
BTBD10	674.690936237698	0.37067784192806	0.0383626102563169	9.66247706950606	4.35211082030414e-22	2.45445364243585e-21
BTBD11	273.400177075221	-0.155859060545442	0.171617142534612	-0.908178858146459	0.363783732179701	0.435674432077232
BTBD12	326.931798822224	-0.302352492095804	0.057483961667625	-5.25977130532548	1.44234674396143e-07	3.18012944889529e-07
BTBD16	4.36620430839755	-1.35506770279407	0.2031191202123	-6.67129564847345	2.5355483621969e-11	7.20891201016766e-11
BTBD17	397.115409780033	-0.810343522346999	0.151016435953792	-5.36592932569901	8.05334735058324e-08	1.80570789941446e-07
BTBD18	3.2473477710815	-0.378912699063403	0.107431262830063	-3.52702452788602	0.000420257829448385	0.000715919522868189
BTBD19	23.7212600347278	0.381605316245426	0.116578016524343	3.27339002345903	0.00106265734539102	0.00174470092840821
BTBD2	2966.09168987331	-0.0271575671272554	0.0483465000325354	-0.56172767643944	0.574301574619023	0.657030054620127
BTBD3	1633.59044804704	-0.0817307147072525	0.0595482575100361	-1.37251228037156	0.169904018602774	0.215120850519853
BTBD6	966.84739895263	0.407856006576676	0.0600930057403824	6.78707948706578	1.14426173280056e-11	3.33109556699544e-11
BTBD7	618.791889844522	-0.295343145201229	0.0478076899468941	-6.17773302850029	6.50285535776295e-10	1.6851025973073e-09
BTBD8	9.1281459417155	-2.80671996913246	0.165243420402269	-16.9853659667645	1.05394187411586e-64	6.99789015406218e-63
BTBD9	596.620808015762	-0.703477713226612	0.0548389266470969	-12.8280722515537	1.141696327332e-37	1.6739220501849e-36
BTC	6.75084170539445	0.431933122125386	0.273351177032992	1.58013997530091	0.114074814332342	0.148319070260024
BTD	360.848806964799	0.0155275685359237	0.0571055699231809	0.271909877737172	0.785691315964664	0.864764616353916
BTF3	5499.90627936204	-0.0326160809974383	0.0462606921765074	-0.705049567200419	0.480779390134585	0.561469239219118
BTF3L1	0	NA	NA	NA	NA	NA
BTF3L4	1360.74488622176	0.190228037124566	0.0488505392673101	3.89408264428031	9.85710423195044e-05	0.000176823519925464
BTG1	2356.89942039809	0.591911009385873	0.0501172309370491	11.810529000083	3.44387636809092e-32	3.61818018000814e-31
BTG2	3558.48776697167	-0.259552953881815	0.0957673260719652	-2.71024538877457	0.00672334459644789	0.0101832535529388
BTG3	816.616158207205	0.91755043374221	0.0642662322288936	14.2773335532449	3.02973761745309e-46	7.31290401666767e-45
BTG4	0.235570108022869	0.129279673634661	0.66507541249334	0.19438348073942	0.845875623687948	0.920058869229252
BTK	254.973123341204	0.151356188109373	0.0961954376755564	1.57342376901346	0.115620726845003	0.150180525186633
BTLA	3.40878971995954	-0.0814583562221729	0.147981981567556	-0.550461315352679	0.582003003194049	0.664843945821065
BTN1A1	1.97586420175167	1.6251281628499	0.345012916129224	4.71034006808375	2.47303799073533e-06	5.00907037564715e-06
BTN2A1	552.254460107946	0.003163572277727	0.0368836529297633	0.085771663770704	0.931647932480444	0.989982607420754
BTN2A2	315.247845828703	0.208979113017709	0.0731344918753686	2.85746311567788	0.00427042262736917	0.00659434573408665
BTN2A3	17.9849914181502	0.458895193541982	0.0956546254277271	4.79741770447584	1.60724208799623e-06	3.29879412731948e-06
BTN3A1	732.528895186879	0.140604622437616	0.0775822821664323	1.81232903327058	0.0699353710437867	0.0937925406000731
BTN3A2	1190.05626354052	0.111319930529671	0.0984111124694062	1.13117236190454	0.257982552236806	0.317507079205506
BTN3A3	600.706258336911	0.0306763579895982	0.0918331097197822	0.334044639054514	0.738345874352305	0.820060864107432
BTNL2	0.660381262731095	0.480502239004306	0.36015084929267	1.33416939026523	0.182148348762672	0.229606586397334
BTNL3	0.917728790200749	0.447647053751436	0.339904177133726	1.31698014871798	0.18784527874685	0.236410038731756
BTNL8	2.34532533744812	0.681008650118554	0.193559004910197	3.51835168007043	0.000434236479223773	0.000738647750391857
BTNL9	132.209326047445	-1.13805031496264	0.130000048408292	-8.75422993219475	2.05501759684457e-18	9.20184991139304e-18
BTRC	817.138898230623	-0.822724928725266	0.0527114014919825	-15.6081019559004	6.41161837571643e-55	2.5252153228812e-53
BUB1	288.480223302547	1.50404498975708	0.147630150545527	10.187925597849	2.24503446903755e-24	1.46112474354523e-23
BUB1B	227.713926015475	1.09853285844212	0.153993111363931	7.13364934776837	9.77421461813832e-13	3.05366781162369e-12
BUB3	1326.87158596031	0.0435696049905147	0.0399311071799858	1.09111938204289	0.275220355354096	0.337011267142812
BUD13	424.349404282677	0.0155699684132158	0.0377529801874411	0.412416935985238	0.680033851841635	0.763378354774124
BUD31	1684.05960836235	0.672655020886946	0.0572422897571535	11.7510152675695	6.97754322057229e-32	7.17399125702219e-31
BVES	280.560330163989	-0.149819998616344	0.119941001562857	-1.24911411997696	0.211623336884414	0.264098409483077
BYSL	409.105708946784	0.207120735870057	0.0537160073463502	3.85584756019901	0.000115329342902602	0.000205799895216661
BZRAP1	1068.84613287432	-1.80453045255752	0.113526050167317	-15.8952984790536	6.83023612551923e-57	2.97991717688582e-55
BZW1	3945.67804139844	0.720039819828242	0.0382063960893132	18.8460544183503	3.16593323045846e-79	4.80247717728006e-77
BZW2	1020.55694043343	0.880606913239815	0.0775607913113429	11.3537639102327	7.10374546496299e-30	6.42595690683809e-29
C10orf10	1690.12520370011	1.1084209428222	0.132159619063307	8.38698651432434	4.98762189849172e-17	2.04652317599369e-16
C10orf105	224.843091232499	-0.801883539100813	0.204935221187755	-3.91286346218717	9.12081102135445e-05	0.000164093051127735
C10orf107	82.3339006393003	-0.0538305546061026	0.139963883637249	-0.384603179100245	0.700531438400979	0.783222585625769
C10orf108	3.20849585228967	0.727021691432525	0.159555544905914	4.5565429384559	5.2002412411157e-06	1.02919266634687e-05
C10orf11	41.7742782467242	0.359994211950606	0.116802972542345	3.08206378754698	0.00205570780790307	0.00328141152435232
C10orf110	33.156261559467	-0.082188435333804	0.12032435939586	-0.683057327264954	0.494570618572877	0.575869898338282
C10orf111	8.30345865901674	-0.339827195066306	0.0913783479235605	-3.7189028121911	0.000200090013686551	0.000349895811820412
C10orf113	0	NA	NA	NA	NA	NA
C10orf114	65.7230534966739	0.476222969430137	0.105141256051856	4.5293635183059	5.91616353856069e-06	1.16713430352558e-05
C10orf116	344.361999076096	-0.928154583832058	0.139879947634332	-6.63536553687025	3.23699336752159e-11	9.15963684998217e-11
C10orf118	163.939538013752	-0.938714782399061	0.0719776411527266	-13.0417552918585	7.08078835470055e-39	1.13338592820369e-37
C10orf119	1035.30092751388	-0.0302986127839403	0.0397683897829232	-0.761876780762963	0.446133549256589	0.524487515878141
C10orf12	40.6465840203955	-0.751654516471881	0.0812798745105036	-9.24773224612628	2.29305914970462e-20	1.15296089832165e-19
C10orf120	0.165631995733116	-0.842369705764368	0.897268193747846	-0.938815965654406	0.347825240286447	0.41788191412506
C10orf122	0.0218963691583057	0.0974043306641614	2.60855824265405	0.0373402936041246	0.970213678230677	0.999525589211984
C10orf125	79.8977548061996	0.292178738295312	0.104496640273921	2.79605868216827	0.00517300067273079	0.00791646540945609
C10orf128	14.8147378591309	-0.225133845389737	0.135474155571079	-1.66182135951101	0.0965485982093165	0.126920762395022
C10orf129	0.00591717243123654	-0.0396535641229648	2.90469144273556	-0.0136515581447165	0.989107970842053	0.999525589211984
C10orf131	0.81403968588911	-1.09418144877506	0.213614918700811	-5.12221456923416	3.01967987887475e-07	6.51724715020359e-07
C10orf137	270.186385461282	-0.459667297861447	0.0497193150138479	-9.24524599209421	2.34700220337218e-20	1.17828114690681e-19
C10orf140	42.5022954940783	0.713227242855689	0.109199653799832	6.53140571455534	6.51552343035691e-11	1.80686432353591e-10
C10orf18	1065.70275886639	-0.856005912006365	0.0573059900272482	-14.9374596198294	1.88006927401202e-50	5.68634449133698e-49
C10orf2	348.839905946357	-0.829145683550446	0.0609622741148116	-13.6009638024477	3.95191032867094e-42	7.62540818800303e-41
C10orf25	109.535347313097	-0.416917108843993	0.0662208259168843	-6.29586090284162	3.05698411559838e-10	8.10047389943566e-10
C10orf26	1547.83094772909	-0.406878696890861	0.0473099399905443	-8.60027928532953	7.95223425311615e-18	3.43071668062679e-17
C10orf27	0.0192326167064378	-0.0486188447470006	2.90469144273556	-0.0167380410985109	0.986645598998319	0.999525589211984
C10orf28	207.4993721317	-0.439061083071169	0.0406435861714759	-10.8027151250572	3.34173052246642e-27	2.57216728739414e-26
C10orf32	688.419356707559	-0.691161826962506	0.0597143981903369	-11.5744585545258	5.55206678265703e-31	5.39609447777213e-30
C10orf35	155.609433001942	-0.0272459173519077	0.121325654088834	-0.224568476935294	0.822314990282713	0.899243143590923
C10orf4	405.984429640951	-1.32522454047874	0.0640831295104177	-20.6797725174034	5.26886999118431e-95	1.52797229744345e-92
C10orf40	0	NA	NA	NA	NA	NA
C10orf41	51.9972077235438	0.666724896630261	0.0826200733474885	8.06976887839483	7.04313649266902e-16	2.67766824051346e-15
C10orf46	852.124978303721	-0.366287508807351	0.0417822431323998	-8.76658315463479	1.84170099827339e-18	8.26732157658802e-18
C10orf47	15.7998957450735	0.561297314735441	0.0995294164650131	5.63951176115606	1.70533004692216e-08	4.01541594332e-08
C10orf50	0.801279771664082	-1.27824271447614	0.256239301716307	-4.98847251734761	6.08585670255423e-07	1.28590050545772e-06
C10orf53	0.0725212246107565	-0.00555930400280447	1.19535482819412	-0.00465075630405339	0.996289246725921	0.999525589211984
C10orf54	2137.78721658685	-0.672632625237891	0.0864708226877119	-7.77872355473122	7.32599515426689e-15	2.61529008765646e-14
C10orf55	9.84361920778627	0.88126081100819	0.161651994915255	5.45159254898269	4.99207300825947e-08	1.13597599495588e-07
C10orf57	456.490105858297	-0.300636821715748	0.0416119682547619	-7.22476812140085	5.0195758013522e-13	1.5955195809585e-12
C10orf58	2430.00713752881	-0.980251126962802	0.0755483848506692	-12.975143398504	1.69279238786078e-38	2.63263926566361e-37
C10orf62	1.13618148974951	-0.392868086528816	0.217119241963537	-1.80945771077625	0.0703799243758818	0.0943583506167758
C10orf67	2.3981676791175	0.0580131305135987	0.244686553066621	0.237091616954542	0.812585715685491	0.890282255309621
C10orf68	4.28725276278802	-1.28267397795581	0.133041782356503	-9.64113645530331	5.35913403899939e-22	3.0040398876938e-21
C10orf71	0.00529431230208056	-0.00752002879552702	2.90469144273556	-0.00258892517287305	0.997934338883018	0.999525589211984
C10orf72	456.543689696002	-0.391988757621736	0.0694745600510063	-5.64219129036511	1.67899404877349e-08	3.95576614597529e-08
C10orf75	262.336225909126	-1.19770674063954	0.0863218851153935	-13.8748909275843	8.99297878631023e-44	1.89467459044912e-42
C10orf76	591.011893053131	-0.315078069686299	0.0350224397949069	-8.99646259744925	2.33107413252429e-19	1.10157636935967e-18
C10orf78	121.665466455676	-0.163468072631094	0.0579725402109894	-2.81975004090137	0.00480610709121752	0.00737846880800385
C10orf79	59.6286969246408	-0.557304215578748	0.171286656057282	-3.25363474544317	0.00113938674974102	0.00186586170942475
C10orf81	30.7208749528009	0.406110927744477	0.271364400576739	1.49655196805976	0.134509876098916	0.173153257828228
C10orf82	2.32589514202794	-0.951668462940459	0.262839002246837	-3.62072772611856	0.000293775546760878	0.000506802010508661
C10orf84	552.300223732813	-0.10861324488672	0.0508412549536965	-2.13632108384498	0.0326532515038827	0.045749351307749
C10orf88	159.158755008844	-0.265217304388116	0.0425164588686059	-6.23799139076354	4.43225043536763e-10	1.16290551603845e-09
C10orf90	122.286283466546	-0.668444221705342	0.122311347002615	-5.46510391788139	4.62635698034868e-08	1.05555663140664e-07
C10orf91	0.0356990904230545	-0.0400928805948689	2.08486488755477	-0.019230445499944	0.984657270093307	0.999525589211984
C10orf93	17.9985154857024	0.199861483097774	0.104802875391136	1.90702289752898	0.0565176224500704	0.0768480669320409
C10orf95	3.05754097423878	-0.131254135719858	0.120514902207621	-1.08911124944312	0.276104829685367	0.337975620198351
C10orf96	0	NA	NA	NA	NA	NA
C10orf99	0.0356342430744906	-0.168628355142779	2.26989040845201	-0.0742892055558654	0.940780266016506	0.995716339944477
C11orf1	238.90171403691	0.0821678976566725	0.0604767809313994	1.35866850700731	0.174251655896248	0.220370849373052
C11orf10	1164.93140148698	0.668710950206159	0.0520870354010397	12.8383376987666	9.99986093399879e-38	1.4749233928082e-36
C11orf16	0.205738445753952	0.643865418502874	0.445274378361054	1.44599700722235	0.14817804123456	0.189523347590188
C11orf17	469.011780485772	0.365618626548714	0.0446186474060947	8.19430098857665	2.52053621198941e-16	9.89153713441415e-16
C11orf2	2519.27767040965	-0.68168540525735	0.0536215460953688	-12.7129009679231	5.01392856416869e-37	7.10306546590564e-36
C11orf20	14.1788320902516	-1.85192001749377	0.164918004356789	-11.2293380259882	2.9266292534007e-29	2.54916646983488e-28
C11orf21	8.13762035225392	0.474733414331348	0.158698171322156	2.99142334392526	0.00277680244197556	0.00436949761855714
C11orf24	639.580196732236	0.424969438759119	0.0503571538997184	8.43910757159561	3.19769701693949e-17	1.32503856217791e-16
C11orf30	375.098443557651	-0.199454246700838	0.0518129058264822	-3.84950898852877	0.000118354840618185	0.00021104597676016
C11orf31	1055.38844564503	0.691315903345715	0.0622828323544615	11.0996221143465	1.25975383921157e-28	1.05982703537765e-27
C11orf34	0.115123130845797	0.0814339026694817	0.665323212536942	0.122397507158914	0.902584212667353	0.967439975747375
C11orf35	7.74225465335875	0.585335224484704	0.167981283856607	3.48452643679258	0.000493008756113479	0.000834517825798953
C11orf36	0.0107913216207604	0.0274541013477851	2.90469144273556	0.00945164121182167	0.992458793683426	0.999525589211984
C11orf40	0	NA	NA	NA	NA	NA
C11orf41	828.047341508909	-0.997324498927897	0.0960748282009667	-10.380705514682	3.03523762089093e-25	2.08046179645357e-24
C11orf42	1.02207412717739	-1.77746687272155	0.228229912113386	-7.78805396830935	6.80491171069362e-15	2.43147053696101e-14
C11orf45	44.2174684920656	-0.0882426827148399	0.09396727889816	-0.939078834138378	0.347690270441423	0.417745210083767
C11orf46	613.688537900894	0.0625129095498237	0.040975500737127	1.52561673256581	0.127105342516158	0.164200285255069
C11orf48	627.407147051919	-0.0846432540980472	0.056340878452327	-1.50234175297193	0.133008870789448	0.171422451602373
C11orf49	1232.89493423428	0.014852953341596	0.047425133610899	0.313187379996807	0.754138305797134	0.835370603575668
C11orf51	463.534136506654	0.431302617135303	0.0605426834149859	7.12394285828011	1.04882540340791e-12	3.27104807135917e-12
C11orf52	15.8483472884988	-0.815683378086224	0.148867504756696	-5.47925740690925	4.27114613699488e-08	9.77338150632849e-08
C11orf53	0.0987656835256009	-0.362315409372056	1.09820940483933	-0.32991468455423	0.741464427492353	0.822968340752474
C11orf54	534.66245229988	0.00853061614353004	0.0453141464228227	0.188255033294273	0.850676733283558	0.924261442443624
C11orf57	1059.53294386389	0.0352033140126775	0.0327255645582013	1.07571296287554	0.282055648213593	0.344639530502017
C11orf58	3211.05979585361	0.41872624049045	0.0393929428205873	10.6294734667961	2.17336014880585e-26	1.59444427583524e-25
C11orf59	2480.06321077844	0.349785540597947	0.0493957932801966	7.08128197504179	1.42826943072698e-12	4.42019353012179e-12
C11orf61	251.649707906824	0.149332974778744	0.0574264334178991	2.6004222426984	0.00931091172271215	0.0139025652435741
C11orf63	68.0901522940527	0.886128843516076	0.183319073314811	4.833806038253	1.33947100300827e-06	2.76012206680491e-06
C11orf64	0	NA	NA	NA	NA	NA
C11orf65	5.80299097146126	-0.354884070670349	0.104937570022054	-3.38185904815373	0.000719970764385653	0.0012024920363924
C11orf66	55.3671455187992	-0.683401061341877	0.11886392926164	-5.74944026827174	8.95393786574483e-09	2.14546360525502e-08
C11orf67	235.284872854918	-0.20827908385424	0.0588863250439369	-3.53696862045367	0.000404747752038979	0.000690511780448885
C11orf68	1183.29405766589	-0.192172372818812	0.0385806203389656	-4.98105969086044	6.3237028800858e-07	1.33486855914464e-06
C11orf70	62.4148545988806	0.324469232374128	0.180166560075777	1.80094037560388	0.0717122782402728	0.0959862978957565
C11orf71	357.754637523036	-0.305080986830468	0.0656364661063533	-4.64804101939512	3.35102285504956e-06	6.71839881065242e-06
C11orf73	641.900455656827	0.112388972261452	0.0488922448898484	2.29870754584206	0.021521551758936	0.0309062773584487
C11orf74	205.067154169183	-0.195803454893389	0.051019476702022	-3.83781778156946	0.000124132538292326	0.000221148582087331
C11orf75	137.223370362939	0.0960857844260211	0.0804075229325447	1.19498500789073	0.232092887652485	0.287889781388037
C11orf80	103.006258569331	0.515814834793423	0.0675854273149031	7.63204222102599	2.31063731618467e-14	7.96743624325263e-14
C11orf82	118.289767129943	1.24756284712854	0.112134394457357	11.1256038182199	9.41661036253265e-29	7.97661324523814e-28
C11orf83	371.32743522313	0.0980625843613085	0.0712631145481641	1.37606368993361	0.168801915830991	0.21389023839794
C11orf84	438.770128693175	0.264118786286375	0.0475125252435243	5.55892967028462	2.71434036622695e-08	6.29875170887214e-08
C11orf85	0.0270358243509251	0.0359802834225841	2.12761219441703	0.0169111097957599	0.986507529699766	0.999525589211984
C11orf86	1.35366569061674	0.573154977774182	0.359166049334024	1.59579386425009	0.110534823648788	0.144001236860283
C11orf87	122.691784922733	-0.537807809762542	0.206127114626375	-2.60910754384434	0.0090778707918308	0.0135772174451956
C11orf88	11.9250801002953	1.74884464164484	0.36723174898054	4.76223705194268	1.91458586640598e-06	3.91250085860373e-06
C11orf9	1534.38450541465	-0.764451356697548	0.168586018839821	-4.53448845852322	5.77432592095082e-06	1.13983690852002e-05
C11orf90	1.29708944135363	-0.173261141713911	0.253969640632142	-0.682212020628359	0.495104894822985	0.57642392997457
C11orf92	76.5898245765993	-1.18694483409335	0.160019973629541	-7.41747925069171	1.19370381924731e-13	3.94236129887071e-13
C11orf93	82.0532843591592	-0.690492155802126	0.128503212841881	-5.37334546375706	7.72890471516395e-08	1.73453967205e-07
C11orf94	0.0163531514467466	-0.0661059098186564	2.90469144273556	-0.0227583242908581	0.981843051804407	0.999525589211984
C11orf95	763.660182555429	-0.234837581759967	0.069062576640665	-3.40035940132723	0.000672973349903966	0.00112705175882006
C12orf10	812.621105101748	0.199818002696283	0.0470903855191258	4.24328661771363	2.20269813694979e-05	4.16184796978537e-05
C12orf11	470.142878687191	0.0157256934529307	0.0447573013039629	0.351354817980017	0.725322174251892	0.807323659549997
C12orf12	0.0290230195548841	0.149863556849377	2.90469144273556	0.0515936235582529	0.958852500238248	0.999525589211984
C12orf23	1297.68713099899	0.357331984928472	0.0448856934769983	7.96093269922602	1.70747246057294e-15	6.34112183097897e-15
C12orf24	330.154666748713	0.195046354041904	0.0575951859564477	3.38650445871281	0.000707891261854207	0.00118331912212978
C12orf26	60.6863254428256	0.365992122370848	0.0580867478701003	6.30078521850316	2.96141523297328e-10	7.85567775009861e-10
C12orf27	0.0704103217100802	0.0733547754874829	1.2520896403815	0.0585858816507198	0.953281956177322	0.999525589211984
C12orf29	591.821326403425	0.406784469708345	0.0561495387293171	7.24466271520682	4.33516671361369e-13	1.38354891717854e-12
C12orf32	690.532341128525	0.336230672367663	0.057030810400716	5.89559695899819	3.73329211085758e-09	9.18763514615144e-09
C12orf34	808.715478545449	-1.41035559173907	0.114731434585427	-12.2926693703018	9.9176107671192e-35	1.22464173029174e-33
C12orf35	440.615661573841	-0.459208265291835	0.0603147837760575	-7.6135275059068	2.66714534330321e-14	9.15351656281575e-14
C12orf36	0.013691080746535	0.0128076310920022	2.90469144273556	0.00440929143232521	0.996481905841781	0.999525589211984
C12orf39	35.5888554077877	-2.46840922109773	0.221654433984476	-11.1362952534963	8.35218985725104e-29	7.09936137866338e-28
C12orf4	517.351786859064	0.288894070250994	0.0570196929981853	5.06656656780297	4.05055143326319e-07	8.66155652395903e-07
C12orf40	0.158042502022859	-0.363202776852248	0.871540645300459	-0.416736475585755	0.676871171417064	0.760174241149524
C12orf41	722.385094440998	0.783623522869303	0.0534611794641706	14.6578046111849	1.20093538512086e-48	3.33086438742383e-47
C12orf42	0.773383779011102	-0.17711872543567	0.281735290474707	-0.628670711209929	0.529564656644656	0.612349890291581
C12orf43	336.430712676093	0.086973255557573	0.0333120024463248	2.61086843091201	0.00903126318670671	0.0135085338320583
C12orf44	744.978607109461	0.307329347743129	0.0473761814614724	6.48700123696246	8.75616201379827e-11	2.40824985930407e-10
C12orf45	100.924690804911	0.629595376370787	0.0588245665841856	10.7029326849311	9.86070360929794e-27	7.3936530484926e-26
C12orf47	420.831372565446	0.340231967604087	0.0541968577618948	6.27770652495837	3.43603692928155e-10	9.07927753523143e-10
C12orf48	89.7063459788315	1.87222284915365	0.101620569787519	18.4236602202519	8.48659045647462e-76	1.09382721439006e-73
C12orf49	674.461996563018	0.25980597699676	0.0591239791409648	4.39425730087151	1.1115210402007e-05	2.14578511138109e-05
C12orf5	518.956888213618	0.554556460296983	0.0617938086126529	8.97430459049957	2.85147312391134e-19	1.34011081991257e-18
C12orf50	0.39135500779542	1.56741744671543	0.444499471197454	3.52625266908172	0.000421484643572818	0.000717823401956643
C12orf51	1641.89893411838	-1.06994246751856	0.0660446196514218	-16.200297210668	5.01839451334128e-59	2.46789874820673e-57
C12orf52	432.301135359246	0.332031946034812	0.0418594534369445	7.93206596772632	2.15529889115267e-15	7.94587663741461e-15
C12orf53	1409.49012237089	-0.970813547429231	0.0991587297905041	-9.79050003444276	1.23682696520492e-22	7.23316362806676e-22
C12orf54	0.638128325137152	-1.22578461427007	0.27581874381824	-4.44416719944834	8.8232969519437e-06	1.71762503348795e-05
C12orf56	0.44758370269346	0.318115799468734	0.524509443567826	0.606501567073497	0.54418174206289	0.627119211867706
C12orf57	2001.79252379216	0.498102394261686	0.085328040428811	5.83749951081148	5.29900502249703e-09	1.29183309486514e-08
C12orf59	66.6896960582621	0.0575244764158958	0.107735761267104	0.533940408823754	0.593382763570966	0.676348656009448
C12orf60	28.9692507280902	0.723491526232302	0.0818416251473001	8.84014124756379	9.55976687119545e-19	4.36082819107042e-18
C12orf61	10.7331588551044	0.663864635223101	0.0973133971983818	6.8219243632997	8.98289622047614e-12	2.6313534383213e-11
C12orf62	589.956946360311	0.634257225381903	0.0683394463443755	9.28098278973112	1.67922424936641e-20	8.51048630108084e-20
C12orf63	14.7147426088788	-0.306495408672142	0.226139581108852	-1.35533729729786	0.175310117050791	0.22162417515492
C12orf65	403.418747724899	-0.114540360364508	0.0406472111694994	-2.81791436777478	0.00483366993550186	0.00741905130200005
C12orf66	98.7789220098112	0.253678515462094	0.0558648917602285	4.54092915011596	5.60068519093271e-06	1.10644672375469e-05
C12orf68	345.308824071125	-0.258930837888176	0.110637667807713	-2.34034974723252	0.019265688727057	0.0278044043982409
C12orf69	1.24615995252296	0.239705746945104	0.195552497539107	1.22578719250143	0.220278768081515	0.27420131969243
C12orf70	1.29844975680175	1.83101660208533	0.250305805260951	7.31511840157458	2.57154546861131e-13	8.31871335974658e-13
C12orf71	0.580222307374284	-0.382113466753015	0.272764980726366	-1.40088902078066	0.161247262450703	0.204844167720664
C12orf72	57.6107073972027	-0.107095813055439	0.0513045520216515	-2.0874524547109	0.0368472545980533	0.0512576086818292
C12orf73	159.515937857375	0.261037235522009	0.0515467651383975	5.06408568648589	4.10365053976354e-07	8.76844605527544e-07
C12orf74	0.0440795971994733	0.237306941765119	1.56496149598587	0.151637559373705	0.879472807847126	0.948960591526883
C12orf75	189.854624281526	0.328991769157014	0.0800033548484237	4.11222466583219	3.91864677855309e-05	7.25593563127389e-05
C12orf76	699.004569949567	-0.122045284796936	0.0558467770706101	-2.18535949966509	0.0288624979511522	0.0407217900548559
C12orf77	0	NA	NA	NA	NA	NA
C13orf1	333.032463827326	-0.180627162377055	0.048572749371094	-3.71869339734241	0.000200255941275881	0.000350123872857555
C13orf15	2185.49903630346	-0.89502310308413	0.0978272476372506	-9.1490165030803	5.74542135323516e-20	2.82402066514949e-19
C13orf16	7.06408413884056	-0.605419981976501	0.153027926277717	-3.95627122906819	7.61287229437559e-05	0.000137843946051865
C13orf18	305.849827405408	0.881532835493074	0.11946737223404	7.37885850344247	1.59652391581202e-13	5.2280723380626e-13
C13orf23	768.866191567645	-0.0651606599877345	0.0517621082646623	-1.25884864763554	0.208085005095804	0.260007369185733
C13orf26	30.4110483894289	0.721353817914313	0.228820913290342	3.15248203296442	0.00161888783986505	0.0026118357360827
C13orf27	217.930973672395	0.221796872162533	0.0780623807211814	2.84127732351302	0.00449332193612561	0.00692095559552921
C13orf28	0	NA	NA	NA	NA	NA
C13orf29	48.0275147236786	1.16487196367069	0.133009502824423	8.75781007322734	1.99080240715293e-18	8.91836062450156e-18
C13orf30	4.18795026057109	0.0227635119845316	0.50948391687032	0.0446795496987702	0.964362734393489	0.999525589211984
C13orf31	141.526737911349	-0.350369260746882	0.11904144420067	-2.94325445309837	0.00324781352094536	0.00507382418070525
C13orf33	47.7474179520372	2.67863810966149	0.235713741839573	11.3639454736779	6.32233312560065e-30	5.74016617112546e-29
C13orf34	110.388543497655	0.830851518475822	0.0673362003189946	12.3388536112789	5.59467818900138e-35	6.98714717461098e-34
C13orf35	0.124703450562674	-0.187442893435021	0.616808809784913	-0.303891401130253	0.761210629087628	0.842135966654026
C13orf36	37.5659697278884	-1.18480198616126	0.242550697622647	-4.88476016673653	1.03554824777532e-06	2.15275262978381e-06
C13orf37	366.539350801762	0.727430156848891	0.0605531672151976	12.0130818965044	3.03326311232827e-33	3.42981356508678e-32
C13orf38	21.9049193362016	0.925406023797652	0.118751971464876	7.79276345800595	6.555928416594e-15	2.34505547569805e-14
C13orf39	1.62351104856142	-0.212550905885423	0.461740782405697	-0.460325173743632	0.645282834561192	0.728682213683028
C14orf1	826.039746672944	-0.0129907091629308	0.0494881570753955	-0.262501372664563	0.792934927221736	0.871658217560211
C14orf101	278.336776010813	-0.222017892010775	0.0557373608604252	-3.98328676821894	6.79686568402839e-05	0.000123476915052086
C14orf102	246.543597146326	-0.38329184586071	0.0479937221474394	-7.98629130458389	1.3905886693843e-15	5.19856086450397e-15
C14orf104	294.849142075755	0.220314269541866	0.0511034366541808	4.31114390667583	1.62412159258811e-05	3.09775392260737e-05
C14orf105	1.1210758806168	-1.22506737073371	0.377239205377574	-3.24745507166351	0.00116442046508156	0.00190527477359844
C14orf106	242.929912803162	0.15828325941618	0.0786326548318775	2.01294563632121	0.0441203488183855	0.0607536679490651
C14orf109	325.83910449068	0.655797503388019	0.0435746225506363	15.0499870108099	3.45302093069321e-51	1.08775675324713e-49
C14orf115	0.122633966178846	-0.0589077821975597	0.835793210613943	-0.0704812882534524	0.94381059331881	0.997724068766084
C14orf118	220.532236385458	-0.0991305003066261	0.0564793479988399	-1.75516368051314	0.0792313143529285	0.105449248770989
C14orf119	801.667034943134	0.799486003462694	0.050428330807167	15.8539057443692	1.32108653855818e-56	5.68817173370464e-55
C14orf126	402.280831383164	0.137913792931094	0.0495411620977132	2.78382232251795	0.00537224544151617	0.00821054639283104
C14orf128	131.846446406835	-0.455350111690556	0.0827784126134186	-5.50083164577068	3.78004015013001e-08	8.67781044942534e-08
C14orf129	359.958214203075	0.898446718794159	0.0585403460742938	15.3474787739371	3.68221207549479e-53	1.31784432175603e-51
C14orf132	3581.01266098336	-1.28782191852957	0.0940115810308352	-13.6985454814038	1.0357842558836e-42	2.0548959281715e-41
C14orf135	1085.32035624582	-0.100419717402034	0.0436707019896004	-2.29947568568848	0.0214779425024671	0.0308521124638143
C14orf138	96.790430004321	0.109667459246583	0.0613879795102985	1.7864647137993	0.0740240456408312	0.098926143943968
C14orf139	136.509957611707	-0.624624735104462	0.0893306306598301	-6.9922794733536	2.7045543550558e-12	8.19511553191463e-12
C14orf142	235.145583514746	0.962251950548209	0.0624649325806941	15.4046744436191	1.52253957669019e-53	5.51920596550194e-52
C14orf143	56.6330314578467	0.55577986349857	0.0544314865124316	10.2106317337417	1.77704042226933e-24	1.16655250090383e-23
C14orf145	62.6101926102541	-0.0218533011691516	0.0682917130147646	-0.319999311840763	0.748968852220133	0.830269591645456
C14orf147	1360.70842262895	0.413637365790196	0.0588674242410804	7.0265918905543	2.11639219396425e-12	6.46056564473298e-12
C14orf148	11.7805938073129	0.0646665314148807	0.0879126114444155	0.735577414348195	0.461987911753523	0.541447855686407
C14orf149	210.863357290125	0.36998826892924	0.069836898185353	5.29789092217785	1.17147908812454e-07	2.59977128267116e-07
C14orf153	476.938072489577	0.487324563650743	0.0537901730575277	9.0597322140897	1.30771203328384e-19	6.26989576862568e-19
C14orf156	494.321491253976	0.16478308752614	0.056285288458505	2.92764045524298	0.00341544755421933	0.00532179407152381
C14orf159	1151.36174887755	-0.435841394211392	0.0618531650099845	-7.04638791145186	1.8362190902826e-12	5.63934596797583e-12
C14orf162	11.5554203984212	-0.569330358583747	0.192079082781024	-2.96404142679503	0.00303627408638831	0.00475918647035828
C14orf165	0	NA	NA	NA	NA	NA
C14orf166	1600.01551728107	0.222924355468995	0.0458098770466664	4.86629456005529	1.13710005263895e-06	2.35467951675314e-06
C14orf166B	0.606216098798417	0.638296996441607	0.326967832114847	1.95217062275841	0.0509179507574256	0.0695939831533429
C14orf167	477.244853566548	-0.148689200057257	0.0698607191616985	-2.12836629570193	0.0333067253440444	0.0466086165047229
C14orf169	117.965108347495	0.459081983497709	0.080356638464225	5.71305609930527	1.10965077929989e-08	2.64470792455811e-08
C14orf174	32.1229643362736	0.0738568148074753	0.108373398120266	0.681503174104717	0.495553159017698	0.576843651250163
C14orf176	20.3777885663737	0.176059599168733	0.0857581211939992	2.05297873504547	0.0400746399402068	0.0554849329229009
C14orf177	0	NA	NA	NA	NA	NA
C14orf178	2.1989082070393	-0.726547508048299	0.138817930245811	-5.23381602622782	1.66045727544035e-07	3.64716166982443e-07
C14orf179	345.867633743112	0.465003946646071	0.0601789470720952	7.72702031640717	1.10093081670746e-14	3.8803137990118e-14
C14orf180	1.46840674477412	1.26803152149121	0.349141075364731	3.63186004444353	0.000281385723492056	0.000485895487501168
C14orf181	22.7774180602661	0.141144185011706	0.112925405999998	1.24988866554714	0.211340220435732	0.263790692258538
C14orf182	0.46928796681471	0.716445371709656	0.327811783952423	2.18553879629183	0.0288493645823256	0.040706172693436
C14orf183	0.0192355647919825	0.0156482259078759	2.90469144273556	0.00538722484517627	0.995701637261788	0.999525589211984
C14orf184	0.171361951647026	0.384397652884821	0.583003650580577	0.659340044444015	0.509677433259976	0.591643453254457
C14orf19	6.46052314547782	1.62668143966523	0.0945394868040705	17.2063705299826	2.37881398443877e-66	1.70582588265936e-64
C14orf2	1078.30454552207	0.651786202918942	0.0588730052624025	11.071053703032	1.73350198728058e-28	1.44727600292858e-27
C14orf21	263.485173843817	-0.686001694183499	0.068101757511841	-10.0731863500619	7.25875796029757e-24	4.57617349670934e-23
C14orf23	58.8241737260282	1.53776118310066	0.159764248452368	9.62518960278609	6.25913846180441e-22	3.49166083357236e-21
C14orf28	70.8926554006494	-0.300506838851182	0.0497094611224211	-6.04526446406478	1.49165118457836e-09	3.76878428698083e-09
C14orf33	47.7227012679084	0.134254448481709	0.0591393920054029	2.27013575772716	0.0231993473596252	0.0331491290436787
C14orf34	0.48238437273234	1.94483376940419	0.351105964972551	5.53916470646188	3.03917712712543e-08	7.02279973598706e-08
C14orf37	300.325900822045	-0.346700355719334	0.0778086176679414	-4.45580921638942	8.35773342168638e-06	1.63037395465086e-05
C14orf39	1.73255255355209	0.163361168769574	0.439231740184097	0.371924780984872	0.709948853998497	0.79235901300868
C14orf4	1391.93741066597	0.322842356201794	0.0573597933979963	5.62837376281539	1.81916564658598e-08	4.27223372045677e-08
C14orf43	874.128847153449	-0.271204371936277	0.0591528213114695	-4.58480873648019	4.54402197617745e-06	9.02488804212098e-06
C14orf45	132.874106494682	0.327396619205966	0.0732121459190204	4.47188939889972	7.75315258094253e-06	1.51769077721051e-05
C14orf48	0.0459112030912181	0.158391352510394	1.90174068846616	0.0832875656870673	0.933622887086182	0.991035310020774
C14orf49	59.4784609945646	-1.3358226447132	0.103442340541639	-12.9136931523266	3.76786813136965e-38	5.75095662156421e-37
C14orf50	19.9416496159628	0.991873870003001	0.184527980004838	5.37519497030745	7.64998571149237e-08	1.71800157420145e-07
C14orf53	0.041709275046843	-0.101518582703055	1.78030480784191	-0.0570231469666794	0.954526756525488	0.999525589211984
C14orf64	58.3594255778604	-0.109883946026517	0.0862532278374771	-1.27396908824753	0.202674371509231	0.253616257767754
C14orf68	0.745738800317803	-0.835842673984013	0.262512729187811	-3.18400816817543	0.0014525091362667	0.00235516199368355
C14orf70	0.284022109238434	0.198784605963727	0.714453307410496	0.278233166397133	0.780833376513834	0.860802447722094
C14orf72	0.686181416190004	2.13517510121528	0.341321095675995	6.2556200840341	3.95939543852568e-10	1.04241247383123e-09
C14orf73	0.390040554066402	0.740205281820093	0.536881557456828	1.37871243953023	0.167983432585778	0.212921538153461
C14orf79	271.085022865191	0.14300401276144	0.0608630200863581	2.34960428448231	0.0187933788339414	0.0271386519189604
C14orf80	170.482970846499	-0.261431688953248	0.0850059445800326	-3.07545184333681	0.00210183867388899	0.00335070805570662
C14orf86	33.7684855652929	1.32602693400746	0.152843892367795	8.67569461536989	4.11033816057201e-18	1.80444943291363e-17
C14orf93	223.673758943159	-0.40135151630248	0.0467414232388506	-8.58663447733623	8.95539783351256e-18	3.84750425439799e-17
C15orf17	1605.06457039778	-0.365578501047256	0.037834903775615	-9.66246678504505	4.35254786389359e-22	2.45445364243585e-21
C15orf2	0.50607396734329	-0.954359820656953	0.498147690977093	-1.91581701158751	0.0553883916226348	0.0753697959424758
C15orf21	18.792418930022	-2.60497442342597	0.0968442898939816	-26.898585619015	2.28150021066996e-159	1.95613844149616e-156
C15orf23	309.983326443433	0.661022944972224	0.0693919268944656	9.52593442141387	1.63563724808277e-21	8.87094789114196e-21
C15orf24	1497.87305872268	0.430668432672773	0.048524223441399	8.87532869419078	6.97271797899854e-19	3.2021890672066e-18
C15orf26	13.5510055444014	1.28457225614843	0.325566610053206	3.94565110942579	7.95834235061195e-05	0.000143848314531684
C15orf27	22.4714417951732	-0.280187186188211	0.123844699077301	-2.26240758204212	0.023672232916779	0.0337807680091817
C15orf28	3.59569269639798	-1.42228557914175	0.161659866501424	-8.79801282731619	1.39260123642868e-18	6.28423258177886e-18
C15orf29	454.364909814981	0.0613032450387937	0.0523255550684054	1.17157371687031	0.241368245489141	0.298445699969774
C15orf32	0.0304080488955704	-0.0107998723222585	2.10876469718827	-0.00512142124565084	0.9959137149219	0.999525589211984
C15orf33	33.1870673763635	-0.252300936651864	0.0714523256485165	-3.5310388341027	0.00041393097079948	0.000705812256304864
C15orf34	7.99994190635562	0.333893227043763	0.0970809604733229	3.43932760260973	0.000583161074285711	0.000981642030295709
C15orf37	51.9308748735961	0.254912511102898	0.0684622730251532	3.72340122287852	0.000196556782709403	0.00034386974405868
C15orf38	344.086491023362	-0.336477370467691	0.0503141263960672	-6.68753279782658	2.26964356541164e-11	6.47718829376519e-11
C15orf39	513.460285049457	-0.0524806450260979	0.0670313267588577	-0.782927141139467	0.433669898299039	0.511328573659614
C15orf40	241.846777023704	0.100800223818629	0.0449960908091259	2.2401995819198	0.0250779688035719	0.0356706249860385
C15orf41	139.276375188552	0.303924542024646	0.0456140951598752	6.66295233873227	2.68380717903763e-11	7.62273909990235e-11
C15orf42	120.344029964332	0.164518196436162	0.10910681854122	1.50786356559382	0.131589449242517	0.169662448674836
C15orf43	0.0214480126667093	-0.159665920985099	2.90469144273556	-0.0549682897935384	0.95616372666157	0.999525589211984
C15orf44	846.926327226373	0.235123326775361	0.0354221053439027	6.63775697386188	3.18492400543072e-11	9.01876814863495e-11
C15orf48	25.164771760709	4.01521070978687	0.188999392118262	21.2445694390088	3.70079547990808e-100	1.32690339752341e-97
C15orf5	0.151103000302977	0.2766336342426	0.715215863634128	0.386783415061545	0.698916556336166	0.781594334294499
C15orf50	0.292159129220223	-1.32669755368497	0.423048841962821	-3.13603873143698	0.00171246586230026	0.00275627055211893
C15orf51	10.2029897428034	0.153905126182007	0.195001626236006	0.789250475253675	0.429965626024191	0.507385682795586
C15orf52	697.280677565787	-0.742846417514167	0.0844432326361756	-8.79699171056995	1.40532685830751e-18	6.33875700956635e-18
C15orf53	0.0190228682096805	0.0156482259078756	2.90469144273556	0.00538722484517618	0.995701637261788	0.999525589211984
C15orf54	0.680643131390086	0.872824253208972	0.343928739549893	2.53780551852473	0.011154995475597	0.0165159930008839
C15orf55	0.0837503251656012	0.274680003716321	1.01764500185106	0.269917312242175	0.787223868099928	0.866201019915779
C15orf56	4.13554190632276	0.33153847459527	0.152239687328764	2.17774011765609	0.0294253903568173	0.0414744262623428
C15orf57	319.673001286193	0.183887269677769	0.0522406001416265	3.5200068371964	0.000431535674314433	0.000734306971911349
C15orf58	41.3738323856412	0.14796286071212	0.0436042362706551	3.39331389257003	0.000690524622818692	0.00115526813964407
C15orf59	559.767064582708	-0.791161421680325	0.0989276806388476	-7.99737158064582	1.271032257977e-15	4.76154181749741e-15
C15orf60	0.00565771490248715	-0.00752002879552702	2.90469144273556	-0.00258892517287305	0.997934338883018	0.999525589211984
C15orf61	106.233772725761	0.335471105098647	0.0559756545103403	5.99316092028323	2.05801020449259e-09	5.15155638900658e-09
C15orf62	27.1878597316544	-0.145172614555236	0.0913668173247278	-1.58889867028285	0.112083271455683	0.145873951498552
C15orf63	890.980618373685	-0.228921151123829	0.0583291089401486	-3.92464680642944	8.68570779888885e-05	0.000156665286558207
C16orf11	0.435494425798151	-0.530469874438831	0.600726037947148	-0.883047913574044	0.377210384487644	0.450332290961154
C16orf13	649.837061645946	0.207927524510701	0.0586438369514582	3.54559891234284	0.000391721942849984	0.000668868015672499
C16orf3	2.93697166629759	0.701486134484174	0.157160704481027	4.46349573705849	8.06332033739688e-06	1.57621606912635e-05
C16orf42	1159.3387679603	-0.36980964856179	0.0479168524704977	-7.7177366520366	1.18413537335727e-14	4.16687179918013e-14
C16orf45	2353.74981378312	-0.174884997377099	0.0597194380434454	-2.92844345336725	0.00340663791589899	0.00530890625110859
C16orf46	77.2417730936208	-0.355811450270191	0.05750399884842	-6.18759490462754	6.10890693746388e-10	1.58739813950175e-09
C16orf48	436.415459435534	-0.369174549885242	0.0684835598224748	-5.39070327013123	7.01824789378921e-08	1.58026773767439e-07
C16orf5	2666.4293771326	-0.770686297227756	0.058513304631056	-13.1711292344052	1.2865880180772e-39	2.15377892330072e-38
C16orf52	371.930691899434	-0.252576717064076	0.0404765118887001	-6.24008110576811	4.37344069347334e-10	1.1480864014283e-09
C16orf53	935.002292204913	-0.395307014863498	0.062881556900477	-6.2865335139388	3.24632961406005e-10	8.58835792718864e-10
C16orf54	30.7297019354246	0.41321760285792	0.111187767045968	3.71639447248799	0.000202085988650879	0.000353106405288429
C16orf55	223.418552659793	0.326318714090497	0.0601793962682931	5.42243249891867	5.87934189697441e-08	1.33157944422115e-07
C16orf57	923.672316724483	0.116053282982019	0.0389291065964046	2.98114426784038	0.00287173471108231	0.00451168009102479
C16orf58	1891.86732976951	0.182915896611202	0.0316146697718874	5.78579178371983	7.2171565873518e-09	1.74201135743669e-08
C16orf59	89.451580244937	0.537769888446732	0.10391916306929	5.17488663845538	2.2804939953504e-07	4.95551973424902e-07
C16orf61	467.118292520204	0.381452049685443	0.0553079194698095	6.89687938620913	5.31572768660371e-12	1.57989675930407e-11
C16orf62	1457.16695563747	-0.241205555033163	0.0259842861177334	-9.28274703950972	1.65164292336599e-20	8.37931526853031e-20
C16orf63	696.218422721213	0.497872349212459	0.0405515229926782	12.2775252930045	1.19600915818667e-34	1.46857413446084e-33
C16orf68	191.773622059683	0.117433470453438	0.044457536325929	2.64147499295743	0.00825459006650044	0.0124049040405556
C16orf7	730.952125896342	-0.34316001317304	0.0517264947495541	-6.63412463640789	3.26433918369142e-11	9.23569134898061e-11
C16orf70	453.620201665861	-0.149479337869814	0.0344596351193895	-4.3378096532922	1.43909702533832e-05	2.75283668053853e-05
C16orf71	39.3296900182498	0.240009136073745	0.132067944118184	1.81731560732835	0.0691688015270352	0.0928402372796852
C16orf72	925.644992814383	0.157316843806073	0.029657544039938	5.30444609959018	1.13015629603387e-07	2.5097615042554e-07
C16orf73	1.19208749822412	-0.972118841244765	0.249646471564569	-3.89398189829146	9.86120116051188e-05	0.000176880923126518
C16orf74	34.4076825587917	0.778478816841467	0.139697367366013	5.57260907288123	2.50952272973809e-08	5.83788937483014e-08
C16orf75	121.281433262441	1.18519895998477	0.121301106682735	9.77071844104997	1.50381849583487e-22	8.74507181149882e-22
C16orf78	0	NA	NA	NA	NA	NA
C16orf79	70.0129899431585	-0.620270323777058	0.108930112759101	-5.69420436705858	1.23948548390023e-08	2.94359142604737e-08
C16orf80	883.795381633839	0.170796046719432	0.0483137059376945	3.53514687819004	0.000407548556391539	0.000695109629133467
C16orf81	1.5706349986079	-0.74482174149865	0.237636275009283	-3.13429311863079	0.00172268679692279	0.00277181654987902
C16orf82	0.21645928596223	-0.153800288164335	0.95375573875297	-0.161257523195014	0.871890576926501	0.942532736377075
C16orf86	95.4635040066992	-0.80232458614875	0.0679533894134478	-11.80698406767	3.59216458177143e-32	3.76594819524363e-31
C16orf87	144.3556178698	-0.287992740883073	0.055195422692455	-5.21769246134319	1.81165938331574e-07	3.97042932195892e-07
C16orf88	364.326877235858	-0.0357761898199435	0.0492503921400065	-0.726414313986389	0.467584818791297	0.547356798442621
C16orf89	270.720326846184	0.207899596258955	0.145764556212117	1.4262698811117	0.15379045500265	0.196129326304873
C16orf90	0.00564168500298254	-0.0717870994504032	2.90469144273556	-0.0247141911165601	0.980282935664166	0.999525589211984
C16orf91	242.74626839771	0.464894874414607	0.047472284990084	9.79297445892301	1.20692113116641e-22	7.06245836991145e-22
C16orf92	1.38027940151791	-1.11280243535721	0.218238421937444	-5.09902163642012	3.41413529269716e-07	7.34527034387825e-07
C16orf93	104.911683366276	0.451370109677116	0.08400461346565	5.37315858088775	7.73692278367165e-08	1.73614152587625e-07
C17orf100	161.213032823113	-0.348214403607653	0.0581858613210034	-5.98451918906214	2.17030003578721e-09	5.42781442051032e-09
C17orf101	319.998579745127	0.451517888090965	0.0516350530511505	8.74440639469633	2.24191152231954e-18	1.00069024943733e-17
C17orf102	11.8523157754102	-0.510524133849187	0.157972510847107	-3.2317276664881	0.00123044262255174	0.00200847020252631
C17orf103	362.109312500275	-0.178824353985952	0.0442427834443914	-4.04188751394261	5.30226679682838e-05	9.72295901371171e-05
C17orf104	26.0429893008842	-0.32966872464949	0.064251134281392	-5.1309401512771	2.88298572741105e-07	6.22767866628829e-07
C17orf105	0.00840788197439617	-0.0864335697061859	2.90469144273556	-0.0297565408960565	0.976261218745298	0.999525589211984
C17orf106	241.281941542724	0.63349692866322	0.0694561144809559	9.1208230318861	7.45559530604678e-20	3.63381956093036e-19
C17orf107	21.2526844077245	-0.644428910442375	0.110881529909123	-5.81186885652226	6.17792312325445e-09	1.49850730615717e-08
C17orf108	475.75375226444	0.0217041443532958	0.0762800488985375	0.284532386471922	0.776002418379133	0.856296441953682
C17orf28	523.899015877212	-0.763511103293319	0.0839150741200272	-9.09861680156818	9.14895337638718e-20	4.42850664168766e-19
C17orf37	922.88734851225	0.439695067330976	0.0587246796515275	7.4873983126026	7.02522546370991e-14	2.35728171081095e-13
C17orf39	343.633220512622	-0.339002006488138	0.0326255859512222	-10.3906794806681	2.73398389736037e-25	1.87723406880037e-24
C17orf42	171.251159289083	0.870906213051486	0.0517673233557687	16.8234738942599	1.64239390965516e-63	1.00897220867289e-61
C17orf44	38.6071225075404	0.712926203839476	0.0783376265652046	9.10068679762808	8.97623880094891e-20	4.34810683258935e-19
C17orf46	0.477498280814717	0.383032795801239	0.270476670139147	1.41613986745765	0.156734557531362	0.199651538952164
C17orf47	1.86397009864431	0.282628695427533	0.15919371058505	1.77537601447224	0.0758358217008363	0.101189688337539
C17orf48	127.786064857788	0.347411443413087	0.0485230623819078	7.159718005404	8.0843186271021e-13	2.54019699372934e-12
C17orf49	1079.40234825797	0.109984914191066	0.0523468790142534	2.10107873214598	0.0356340555075097	0.0496575206422226
C17orf50	1.54274851487688	-0.352483293433863	0.191144462600792	-1.84406751123118	0.0651733019833513	0.0877641023703693
C17orf51	644.807328866574	-0.528784985348097	0.0663212043480123	-7.97309081682781	1.54754366660802e-15	5.76237936282291e-15
C17orf53	60.6622050323809	1.03683203765389	0.0928226133173878	11.1700371342558	5.71569804619887e-29	4.91126646932644e-28
C17orf54	0.0558893678805854	0.0501842760707546	1.88080621620715	0.0266823214631631	0.978713113541395	0.999525589211984
C17orf55	2.51710813784867	-0.898809340088848	0.194630055244668	-4.61803979328353	3.87381978144487e-06	7.72335720251671e-06
C17orf56	345.314974460682	-0.0650366984515854	0.0559915789072852	-1.16154428435172	0.245420624954061	0.303125061010528
C17orf57	14.2535763793618	0.0725583913652055	0.116853021073742	0.620937231219862	0.534640923300018	0.617531717183644
C17orf58	259.47982082314	0.596152561413193	0.0483179353440747	12.3381215933164	5.64576885895281e-35	7.04203427568308e-34
C17orf59	248.497012697783	-0.406760688114678	0.0476873294793404	-8.5297434885906	1.466725743586e-17	6.20549917689677e-17
C17orf60	45.7609858698525	0.571618621329388	0.114160623681656	5.00714346939258	5.52437502957686e-07	1.17039831954508e-06
C17orf61	430.12338533434	0.231362665270577	0.0764240723374997	3.0273532696458	0.00246705453698481	0.00390201439439689
C17orf62	1598.60344405993	0.293711701055138	0.0408511301071356	7.18980601723512	6.48834393980164e-13	2.05114046958782e-12
C17orf63	657.212611688898	-0.0921065860487811	0.0435203568744397	-2.11640236118737	0.0343106014331074	0.0479114190809288
[truncated: 18,502 more rows]

## Sheet: DEG
gene_name	baseMean	log2FoldChange	lfcSE	stat	pvalue	padj
EEF1A1P9	3114.88116392589	-4.03758	0.0645269301924438	-62.5719963310036	0	0
FTHL3	202.995202057758	-6.37866	0.0909768652568002	-70.1129646958908	0	0
GCSH	49.8349750571208	-3.58726	0.0862300039724765	-41.6010415958522	0	0
HNRNPA3P1	46.3939355708005	-2.61521	0.0551636236540416	-47.4081640224803	0	0
LOC442454	64.1554297386472	-4.35394	0.0832512219698337	-52.2988465056684	0	0
LOC643387	23.5504276183268	-5.86015	0.137504946932117	-42.6177047024555	0	0
LOC728643	33.867494895555	-5.22454	0.104342784153904	-50.0708892425025	0	0
NACAP1	65.6272013478079	-5.12024	0.084885480005981	-60.3193461912623	0	0
ATP5EP2	115.808521863277	2.67897	0.0715448917600875	37.4446088817976	7.35139688339691e-307	1.61077e-303
PA2G4P4	97.2734470887647	1.73901	0.04672781061762	37.215819728336	3.7864092861803e-303	7.4668e-300
PPIAL4C	10.7027537521295	-3.89666	0.107768653685856	-36.1575983268482	2.8262092025555e-286	5.06662e-283
SUMO1P3	219.26745642667	1.37362	0.0384510955041727	35.7239413706101	1.68009935153302e-279	2.76096e-276
LOC644936	20.478738244637	-5.95387	0.171167640152401	-34.7838352124073	4.27030251780148e-265	6.47772e-262
UBE2MP1	187.975085882684	1.64648	0.0474630215402413	34.6898297929986	1.1214996314007e-263	1.57971e-260
RPL23P8	49.5919649669807	-3.18414	0.0958406248151317	-33.2232498732735	4.97030507482008e-242	6.53429e-239
RPL13AP3	6.34523710422631	-5.92624	0.194810545693261	-30.4205409067595	2.93918469471206e-203	3.62255e-200
GUSBL1	22.2611015500736	-2.58207	0.0859518960532305	-30.0409109293717	2.86975638464648e-198	3.32892e-195
PMS2L2	119.978029530106	1.91858	0.0663336434005697	28.9232515521355	6.09085175153496e-184	6.67287e-181
ATP6V1C2	60.9366823512817	1.63311	0.0569326107765558	28.6849979088909	5.87068926715583e-181	6.09316e-178
H3F3C	295.808535829864	-1.60664	0.0571479852170283	-28.1136194725492	6.67720524143296e-174	6.58372e-171
SLC6A10P	10.3379723565051	-5.08984	0.184273468655415	-27.6211242008746	6.20506495056365e-168	5.82685e-165
RPL17	2563.67466032755	-2.00031	0.0728546677190716	-27.4561994670568	5.85897892239026e-166	5.25178e-163
C15orf21	18.792418930022	-2.60497	0.0968442898939816	-26.898585619015	2.28150021066996e-159	1.95614e-156
ZNF90	341.148415116034	2.21245	0.0824432880269775	26.8359708763496	1.22981031625585e-158	1.01049e-155
EDARADD	124.287311368212	2.48421	0.0929414927774868	26.7287414782937	2.18174154810515e-157	1.72096e-154
LOC407835	129.052547611422	1.27444	0.0480320878293827	26.5331235081202	4.02195130728857e-155	3.0505e-152
PPIA	5897.4595113434	1.30765	0.0496001391654994	26.363855229555	3.56038626399319e-153	2.6004e-150
LRRC37A4	183.21294467035	-2.1779	0.0864445671045138	-25.1942102100519	4.63587112934375e-140	3.26498e-137
ATP8B5P	21.94473101023	-1.84904	0.0742259841809754	-24.9109428634807	5.66279176241565e-137	3.8507e-134
FAM71D	9.51199665725851	-2.07195	0.0841794542009551	-24.6135108660423	9.0540587026773e-134	5.95153e-131
TOP1P2	2.23482444846916	-4.41914	0.184104386289818	-24.003426579077	2.56086974896046e-127	1.62904e-124
CTCFL	8.81218864651317	-2.31484	0.0965405600730428	-23.9779347571742	4.72549357903757e-127	2.91209e-124
BRD7	1280.04357171506	-0.873318	0.0367598577594716	-23.7573709408497	9.21978252591038e-125	5.50952e-122
PRDX4	1700.58899131119	1.64649	0.0694826856168713	23.6964323501999	3.92438477681205e-124	2.27614e-121
LDHA	7985.6028110867	1.90413	0.0807276203150309	23.5871496651958	5.22193984950965e-123	2.94219e-120
LOX	590.217178891019	3.68494	0.157307611970371	23.425083220169	2.37292040996597e-121	1.29983e-118
NACA2	62.7019814342611	-1.71679	0.0735668488689141	-23.3365004358058	1.88975454860659e-120	1.00719e-117
RPL12	3778.57067468578	-1.47047	0.0637206480545135	-23.0768685414312	7.90597636515977e-118	4.10279e-115
CPEB3	200.89326734872	-1.86841	0.0824148770000583	-22.6707321724641	8.71329112670026e-114	4.4058e-111
WBP11P1	4.79396639655763	-3.011	0.133632858657874	-22.5318765468901	2.02206151215905e-112	9.96876e-110
DST	8878.84796542631	-1.56443	0.0695575173767579	-22.4911608725151	5.06569223443384e-112	2.43647e-109
LOC341056	7.92380704550732	-2.24673	0.100023798692661	-22.4619636105499	9.77705966763567e-112	4.59056e-109
VEGFA	4922.15079017765	3.10519	0.139262880535303	22.2973209499309	3.92293541133385e-110	1.79908e-107
CDC26	59.9601880078417	-2.21592	0.100157476942736	-22.1243637946836	1.84218058928668e-108	8.25632e-106
PGK1	9258.21136649478	1.49146	0.0674911216953013	22.0986292599039	3.25808040632954e-108	1.42776e-105
TUBA1C	2423.75796815164	2.71225	0.122838820749496	22.0797870126961	4.94411537233684e-108	2.11952e-105
LYPLA1	1029.01695633554	1.4482	0.0657197260950067	22.0359653359761	1.30239472561585e-107	5.46452e-105
SPTAN1	14249.8854332657	-1.09081	0.0506862550685378	-21.5208214439474	9.93860723739168e-103	4.08311e-100
ZMYND11	2542.5702881218	-1.22215	0.0572795734351085	-21.3366227080241	5.19117008064276e-101	2.08918e-98
TARSL2	487.352434293643	-1.22316	0.0573638661119517	-21.322916112214	6.9584549417521e-101	2.74441e-98
IL8	717.761321852964	4.81377	0.225943919533643	21.3051758613197	1.01645145013035e-100	3.93028e-98
RAB6C	59.421826589773	-1.27108	0.0596797459474232	-21.2982777140504	1.17772246407413e-100	4.46629e-98
SLAMF9	12.1414300529631	5.22608	0.245516950200579	21.2860288739041	1.52952832694197e-100	5.691e-98
C20orf24	1318.06392424424	0.951656	0.0447688570885579	21.2571076761198	2.83349890895336e-100	1.03475e-97
C15orf48	25.164771760709	4.01521	0.188999392118262	21.2445694390088	3.70079547990808e-100	1.3269e-97
MYO18A	2045.08319378675	-1.24019	0.0586403910066839	-21.1491250321254	2.81107271127902e-99	9.89899e-97
DYNC1H1	10773.3079137905	-1.09996	0.0520334990011341	-21.1394625546195	3.44983835971477e-99	1.19352e-96
C5orf53	874.639875015613	-1.38042	0.0653196307958408	-21.133321583647	3.92911654008838e-99	1.3359e-96
ABLIM1	4340.24240486563	-1.55124	0.0736692033807125	-21.0567722020605	1.98229440154922e-98	6.62557e-96
VPS13D	2805.12810539673	-1.62115	0.0771260803755802	-21.0194166696776	4.35755822532211e-98	1.43218e-95
MFSD2B	11.3452884371009	-2.54771	0.121235194862163	-21.0145873726576	4.82416642070595e-98	1.55955e-95
PDK1	335.825367252589	1.81365	0.0868356826181547	20.8859491371219	7.18626044353993e-97	2.28569e-94
TNRC6C	1042.62748671083	-1.36096	0.0651787428316214	-20.8804803350431	8.05777760774528e-97	2.52221e-94
FRY	1187.21138614147	-1.66024	0.0795966478663198	-20.8582059953723	1.28398177398383e-96	3.95627e-94
NCRNA00152	237.623755851018	3.0821	0.148006974255528	20.8240058252902	2.62313168355519e-96	7.95818e-94
RGPD4	104.041640770694	-0.85174	0.0411493911755387	-20.6987248541578	3.55656251130186e-95	1.06266e-92
C7orf68	768.911176187889	2.24947	0.10869491887716	20.6952708131354	3.82075820950339e-95	1.12456e-92
C10orf4	405.984429640951	-1.32522	0.0640831295104177	-20.6797725174034	5.26886999118431e-95	1.52797e-92
ID2B	7.89352102224174	-2.31656	0.112302405936724	-20.6278846657629	1.54251505813426e-94	4.40846e-92
OSTC	966.156351858241	1.32171	0.0642354973352974	20.5759368840846	4.50932539446601e-94	1.27034e-91
SHQ1	226.806720582261	0.793873	0.038743928463017	20.4902591656286	2.62989669916152e-93	7.30445e-91
ANKRD19	45.0830082181514	-1.70581	0.0833661062139961	-20.4617166330703	4.72453195505198e-93	1.294e-90
NUMA1	7592.26613437048	-1.23468	0.0604505738252838	-20.4246172780501	1.01047234338024e-92	2.72966e-90
CA9	243.121018277047	4.83224	0.236714134935427	20.4138081825784	1.26068844652149e-92	3.35956e-90
DYNC1I2	1836.88887085692	-0.690086	0.0338525863520242	-20.3850389355573	2.27035819135542e-92	5.96953e-90
CNIH4	713.653917546342	0.925002	0.0453793283311916	20.3837638639714	2.33028700345233e-92	6.04648e-90
HIPK2	8803.55225506159	-1.6033	0.0790000030058142	-20.2949463727422	1.42510110976775e-91	3.64974e-89
RABGAP1	2199.21999955676	-0.915336	0.0451559151577751	-20.2705664779182	2.3394841613236e-91	5.9147e-89
ZCCHC24	4247.79375619035	-1.26511	0.0624798438594514	-20.2482693167295	3.6794130845015e-91	9.18456e-89
TMOD2	3824.87005598884	-1.48101	0.0732430304269674	-20.2205160056154	6.46038955035882e-91	1.59249e-88
TBL2	901.885092082546	0.918638	0.0454991280695679	20.1902269518087	1.19315124629945e-90	2.90481e-88
UPF2	668.075968654616	-1.15423	0.0571842314492846	-20.1843548175928	1.34370384864846e-90	3.23144e-88
CMC1	146.570588118402	1.26231	0.0629071479916265	20.0663006859493	1.45435167352593e-89	3.42676e-87
FOXO4	674.797063823713	-1.43012	0.0712701506712441	-20.0661191191593	1.45967320346624e-89	3.42676e-87
ZRANB1	940.927013886611	-1.06425	0.0531415480555735	-20.0266110109377	3.22898448279637e-89	7.49124e-87
MRPL36	421.304627686838	1.03051	0.0514647629218571	20.0236869685799	3.42419829280443e-89	7.85177e-87
PLIN2	910.707379750493	2.15715	0.10779302833502	20.011979404244	4.33104742606886e-89	9.81704e-87
FAM171A1	1945.06779602093	-1.56368	0.0784936154254014	-19.9211346086295	2.66874792620686e-88	5.98042e-86
ZBTB47	2316.01030842588	-1.22574	0.0616550226883902	-19.880651732516	5.98513498781502e-88	1.32614e-85
SCAPER	573.499912279666	-1.04046	0.0523562950852298	-19.872709440079	7.01143847860893e-88	1.53628e-85
NXT1	413.884752113624	1.29782	0.0653273881297941	19.8663351695628	7.96069092298078e-88	1.72511e-85
RPL13A	8748.6229271062	-1.51187	0.0762820663687821	-19.8194812289722	2.02182090745158e-87	4.33373e-85
NET1	1044.41719755957	-1.90157	0.0959497264617732	-19.8184314415865	2.06443573564607e-87	4.37749e-85
MYH6	11.1296243728483	-3.06594	0.155534695032939	-19.7122399271678	1.69304425192407e-86	3.55179e-84
MMADHC	1155.85031588339	0.748782	0.037995129109949	19.7073060480214	1.86642144735381e-86	3.8743e-84
HDAC4	972.471869849045	-1.21499	0.0617940182626129	-19.661860158937	4.5763569392607e-86	9.4006e-84
MLLT6	3270.18952017912	-0.956201	0.0486380519518598	-19.6595215741548	4.79224882988787e-86	9.74259e-84
ACBD5	1629.87384491924	-1.06056	0.0539719259712479	-19.6502269823971	5.7554906269474e-86	1.15815e-83
FCHSD2	2052.53331883791	-1.19841	0.0610948295861379	-19.61552438093	1.13955698820894e-85	2.26991e-83
TJP2	4044.28305067304	-2.00566	0.102322872730051	-19.6013336865929	1.50624046849154e-85	2.97031e-83
FAM190B	1551.65057440033	-1.13103	0.057722885760018	-19.5941381227514	1.73498510024345e-85	3.38752e-83
WDFY3	2199.92641147898	-1.07429	0.0550738305681892	-19.5062704835996	9.71139924110449e-85	1.87754e-82
IK	1629.90337279242	-0.646077	0.0332653283873776	-19.4219222859726	5.03688423511198e-84	9.64343e-82
ZNF33A	517.581995815647	-0.954211	0.0491475448600447	-19.4152257294843	5.73833047057742e-84	1.08808e-81
GPN1	966.079973658237	0.881331	0.0454045408308809	19.4106433302432	6.27366640956406e-84	1.17825e-81
CKLF	455.043377280623	1.11927	0.0578142770042048	19.3597311380326	1.68763944543527e-83	3.13965e-81
VKORC1	1241.95974347074	1.10578	0.0572000470111171	19.3317460575265	2.90421106152615e-83	5.35243e-81
KIAA1109	1706.13794048245	-1.22506	0.0635083209196071	-19.289759796673	6.54768020147072e-83	1.19556e-80
CEP170L	4.26101976559063	-3.40298	0.17644031519322	-19.2868758793711	6.92325099194815e-83	1.25254e-80
GLA	377.272165312792	1.02152	0.0531890216265143	19.2054363850492	3.33311237697309e-82	5.97536e-80
HNRNPH3	2689.77791390746	-0.853721	0.0444869149942021	-19.1903877631748	4.45304577276153e-82	7.91118e-80
RICTOR	898.885056739006	-1.42439	0.0742581557874559	-19.1815929940565	5.27395522962797e-82	9.28593e-80
COMMD10	486.106339924438	1.18379	0.0618201612843853	19.148866173471	9.89170047660579e-82	1.72623e-79
GPX7	361.864977145273	1.33718	0.0699268321084503	19.1225342798758	1.63944676282743e-81	2.83596e-79
ZNF322B	18.2498080955791	-1.32217	0.0691924460448863	-19.108602158674	2.14128080960807e-81	3.67183e-79
LOC541471	297.764042861676	2.73446	0.143268902961406	19.0861746550561	3.28997158776068e-81	5.59295e-79
C3orf38	538.381960949115	0.83015	0.0435160897364563	19.0768485934963	3.93267706467432e-81	6.62841e-79
TMEM106C	1385.12804452113	1.54023	0.0807632832668915	19.070970666452	4.40060453028415e-81	7.35423e-79
ANXA2P1	39.0505344789816	2.54348	0.133546448311631	19.0456592247669	7.13816858609777e-81	1.1829e-78
PSMC2	1982.94700291597	0.752685	0.039562924829225	19.0250028350961	1.05881633292072e-80	1.72561e-78
CAPZA1	1999.73747762186	0.872369	0.0459237374951335	18.9960462555165	1.838860811988e-80	2.95362e-78
RBM17	1645.2979146927	-0.870976	0.045850609824345	-18.9959490337444	1.84226938036044e-80	2.95362e-78
ADM	647.567781281522	3.05844	0.161378511382593	18.9519938112483	4.25165032336082e-80	6.7615e-78
HERC1	1436.98957605564	-1.0944	0.057757018597397	-18.9483714715537	4.55461642877331e-80	7.18536e-78
RYR1	716.5976342591	-2.22608	0.117609773140223	-18.927692869766	6.74525467940248e-80	1.05569e-77
DCUN1D5	376.525064374647	0.751679	0.0398015374071894	18.885686657865	1.49580133873123e-79	2.32261e-77
SYT15	68.889130866071	-2.12841	0.112719279068727	-18.8824004531225	1.59184220790547e-79	2.45243e-77
DHTKD1	1053.99072298836	-1.10447	0.0585494922918552	-18.8638235360156	2.2625105492368e-79	3.45866e-77
BZW1	3945.67804139844	0.72004	0.0382063960893132	18.8460544183503	3.16593323045846e-79	4.80248e-77
ANKRD26	187.504658359429	-1.29883	0.0690027974150346	-18.8228417026678	4.90802768524879e-79	7.38827e-77
NUP37	243.076873394564	0.986642	0.0524405059357774	18.8144955068524	5.74527338626483e-79	8.58309e-77
FAM35B	123.7009170343	-0.952262	0.0507441119410634	-18.7659534090875	1.43401507857122e-78	2.12622e-76
PAR5	60.6942102307423	-2.41797	0.12892172172563	-18.75531605549	1.75173300997906e-78	2.57792e-76
KIAA0232	1660.66689437356	-0.785021	0.0418577847517784	-18.7544900987689	1.77915782474704e-78	2.59889e-76
KDELR3	133.691143039734	2.78065	0.148274526547787	18.7533897470208	1.81635981189288e-78	2.63372e-76
ANPEP	192.293639296117	2.73477	0.145861636330685	18.7490680108304	1.97013377015933e-78	2.83584e-76
JMY	713.04490200597	-0.958452	0.0511216243796846	-18.7484617377386	1.99271986322313e-78	2.84757e-76
TOM1L2	2392.71711814846	-0.999841	0.0536506109721345	-18.6361593381528	1.63571621631746e-77	2.3206e-75
FBXW4	1084.49922436713	-1.26246	0.0678862439640784	-18.5966302645211	3.42150622189236e-77	4.81944e-75
CCL20	27.6530094390008	4.67269	0.251324432373154	18.5922531672098	3.71249666756246e-77	5.19223e-75
LOC399744	126.491294920194	-1.64581	0.0885354930324391	-18.5892363823562	3.92729239921562e-77	5.45396e-75
COL1A2	6349.33918995741	3.24959	0.174840920828422	18.5860087908804	4.17083449613976e-77	5.75167e-75
LOC284232	13.3516778965146	1.32098	0.071165983794422	18.562022911114	6.52025987521034e-77	8.92913e-75
SPAG4	45.634466400384	3.22837	0.174016506080196	18.5520805067334	7.84556695426372e-77	1.067e-74
KCNIP3	969.220703624604	-2.15247	0.116056951305496	-18.546704747339	8.67073768565263e-77	1.17114e-74
INO80D	410.149837714496	-0.794591	0.042897316014596	-18.5230940617022	1.34481573311264e-76	1.80407e-74
KIAA1279	1033.87192073528	-0.833015	0.0449885902118111	-18.5161401066525	1.53022520893463e-76	2.03892e-74
JMJD1C	1441.09936937357	-1.18543	0.0640517014177321	-18.507426040296	1.7989368450729e-76	2.38087e-74
LOC728758	45.6422927395352	0.929874	0.0502576025369533	18.5021487331952	1.98403934305621e-76	2.60835e-74
IKBIP	346.916619335042	1.50424	0.0814649708637559	18.4648480602473	3.96136307188206e-76	5.17338e-74
KIAA0427	1520.10918944064	-1.15123	0.0624591245984961	-18.4317050495554	7.31411274907029e-76	9.4891e-74
C12orf48	89.7063459788315	1.87222	0.101620569787519	18.4236602202519	8.48659045647462e-76	1.09383e-73
FSTL5	167.915718045408	-3.61965	0.196536851385375	-18.4171343268073	9.57398085759144e-76	1.22597e-73
SRPRB	1234.23226204407	0.896663	0.048693518901003	18.41441664824	1.00668109216242e-75	1.28076e-73
ZNF638	1868.47970127844	-0.828328	0.0450140713247652	-18.4015359220864	1.27693495496273e-75	1.61418e-73
RAN	3820.58301610716	0.761877	0.0414234731593861	18.3923876066536	1.51173534533099e-75	1.89882e-73
LRP1B	953.100831113633	-1.80238	0.098065401232537	-18.3793430243667	1.9228327938401e-75	2.39989e-73
MED8	535.673225736957	0.673373	0.0366789370584861	18.3585717814132	2.81924681834354e-75	3.49658e-73
TMEM49	1694.30277072918	0.941915	0.051307899321526	18.3580949551291	2.84410753059834e-75	3.50536e-73
MPRIP	2898.62427354601	-0.844266	0.0460232450084747	-18.3443441625454	3.66320358688195e-75	4.48686e-73
NOX4	82.6543288209433	2.79732	0.152512284756472	18.3415949680152	3.85324423719056e-75	4.69049e-73
GLUD1	7933.61737019761	-1.35496	0.0739011818446635	-18.3347441921606	4.37067531953447e-75	5.28771e-73
PDCD4	1128.29342077861	-1.00273	0.0546951773052131	-18.333074618217	4.5069375203743e-75	5.41932e-73
C20orf194	1250.80387913951	-1.05299	0.057489641507805	-18.3162005429269	6.14565071782517e-75	7.34498e-73
SPCS2	797.805868041813	-0.734682	0.0401507673980225	-18.2980854354762	8.57082664043715e-75	1.01817e-72
SEMA3F	184.856435969281	2.16966	0.118855200753704	18.2546293913651	1.90096371938775e-74	2.24473e-72
UBR4	3348.30743373686	-0.853492	0.0467879739194074	-18.2417016289878	2.40842540530357e-74	2.82703e-72
HMGN5	301.146236204907	-1.6162	0.0886772014042555	-18.225623694907	3.23170333725351e-74	3.77096e-72
TMEM60	360.031374079173	0.909357	0.0499513829837427	18.2048361256516	4.72465310874576e-74	5.4806e-72
NBR1	3913.11984987186	-0.749595	0.0412347095072706	-18.1787450972216	7.60542911037599e-74	8.77071e-72
GGH	595.408781409925	1.52577	0.0839557156547671	18.1735398728735	8.36250411097406e-74	9.58771e-72
BOD1	1040.10029514918	0.848425	0.0467072833036832	18.1647239859284	9.81996193704439e-74	1.11936e-71
CISD2	508.766292103621	0.696152	0.0383460245329172	18.1544885607415	1.18324860879185e-73	1.34102e-71
MGEA5	3167.84545563788	-0.878016	0.0484305545738398	-18.1293733754768	1.8687649469481e-73	2.10583e-71
KIAA0430	1769.79114313302	-0.752695	0.0415634123090706	-18.1095468152146	2.67945113019603e-73	3.0022e-71
PCOLCE	990.445980076063	3.01086	0.166283631308723	18.1067552837446	2.81880962627995e-73	3.1405e-71
TTC3	6028.62851799186	-1.12453	0.0622208659681201	-18.0731703779375	5.18468842361497e-73	5.74394e-71
TMED2	3497.69073588616	0.824947	0.045647873905551	18.0719683416655	5.29890259918164e-73	5.83767e-71
TPM4	5403.36347159784	1.28454	0.0710857025497287	18.0702842887479	5.46314757956705e-73	5.98518e-71
RPL7	761.096675136143	-1.25645	0.0695402447316704	-18.0679875455656	5.69535886992197e-73	6.20511e-71
AKAP6	1822.83447819863	-1.47358	0.08161237546481	-18.0557965536977	7.1029832339713e-73	7.6962e-71
RAB42	45.179129263878	2.27453	0.126110795728139	18.035954069776	1.01724467557995e-72	1.09618e-70
PTX3	471.236671137657	3.30135	0.18322603757948	18.017904872796	1.40982338931654e-72	1.51096e-70
PCNA	2032.51539779799	1.20163	0.0667024420923564	18.0148463221339	1.48994197019083e-72	1.5882e-70
COL1A1	6329.06717923583	3.80708	0.211352623361829	18.0129210712319	1.54268537215754e-72	1.63558e-70
C2orf28	2246.21502858512	1.02596	0.0569689370213848	18.0091234019923	1.65224360234584e-72	1.74237e-70
BAGE2	2.36437279497091	-3.92453	0.217982802166794	-18.0038692157655	1.81672172946194e-72	1.90563e-70
SERPINH1	2303.6157345197	1.9101	0.106149418160149	17.9944606746373	2.15307931225138e-72	2.24649e-70
HDAC5	1875.6477133447	-0.888017	0.0493516015728221	-17.9936909568367	2.18320052770823e-72	2.26593e-70
SLC16A10	57.1513095496005	2.78101	0.154596604098805	17.9888231284571	2.38366496267748e-72	2.46104e-70
EDEM2	603.664613660846	0.970624	0.0539673941235319	17.9853809846117	2.53639453552209e-72	2.60509e-70
USP20	1067.40921090974	-0.834146	0.0464188836583642	-17.9699803862604	3.34833118532909e-72	3.4212e-70
WAC	2614.99025268714	-0.83455	0.0464681681273067	-17.9595960703288	4.0373503144312e-72	4.10395e-70
CYTH1	1120.37790202758	-1.07309	0.0598314102672028	-17.9352557065402	6.25751661848754e-72	6.32811e-70
KDELR2	3745.30158383153	1.02968	0.0574342695132547	17.9279451962869	7.1368945191319e-72	7.18059e-70
ZMYND17	74.5885788379715	-1.23446	0.0688744415475775	-17.9233725721973	7.74849448678451e-72	7.75636e-70
SORBS1	5197.8951491717	-1.27409	0.0711038799555438	-17.9186852289513	8.42969448510309e-72	8.39564e-70
NDUFA4L2	757.830381778766	1.86473	0.104151109238082	17.9040583217808	1.09633743827315e-71	1.08099e-69
CLIC1	3176.0200444477	1.87188	0.104552695983224	17.9037091578245	1.10323392223353e-71	1.08238e-69
PSMA2	2295.43643568905	0.910133	0.0508776130981666	17.8886721592068	1.44511059924472e-71	1.41077e-69
ERGIC3	4280.31811739703	0.806288	0.0450767895183249	17.8869957284733	1.48924117943916e-71	1.44669e-69
LOC727896	15.7185494963848	-1.10416	0.0617931800938389	-17.8686336604048	2.07002590817583e-71	2.00103e-69
PLEK2	34.2959687171237	2.91353	0.163110628079978	17.8623126234663	2.31831602030238e-71	2.23011e-69
HDAC3	1026.60035049904	0.596684	0.0334193787945388	17.8544177421513	2.67051168298886e-71	2.55643e-69
FAM13C	329.679003583164	-1.54602	0.0866351632694666	-17.8452221669483	3.14848516352565e-71	2.99943e-69
CHRDL2	25.8369742419787	4.49237	0.251835671394887	17.8384799278122	3.55228484354229e-71	3.36784e-69
PAR-SN	188.362905086366	-1.32018	0.0740749779678451	-17.8222678248034	4.74723565462097e-71	4.47921e-69
RINT1	479.128943832747	0.724334	0.0406431210360947	17.821802208787	4.78691747098019e-71	4.49514e-69
KIF1B	7803.99831878515	-1.14035	0.0640002439088165	-17.8179465324292	5.12848024114118e-71	4.79306e-69
MYST4	880.009051168587	-1.26219	0.0708607002800751	-17.8122599511629	5.6770607083151e-71	5.28074e-69
SLC2A4	68.0543719337798	-2.54244	0.142790090572742	-17.8054686308775	6.40935278591109e-71	5.93392e-69
TRIAP1	527.267868407472	0.973756	0.0547167834517353	17.7962994134189	7.54956821033399e-71	6.95689e-69
PRKCA	3709.63581145033	-1.11829	0.062860754822029	-17.7900048007362	8.44726683504874e-71	7.74791e-69
SPAG9	5387.93384160849	-0.832834	0.0468262641529513	-17.7856115126893	9.13611598820914e-71	8.34094e-69
GPR89C	98.0576925859608	1.62536	0.0914000416686319	17.7828706470558	9.59395029197816e-71	8.71856e-69
HPSE2	104.982997072518	-4.83542	0.272077188231074	-17.7722195156821	1.1600858351553e-70	1.0494e-68
ALDH5A1	1919.11378049572	-1.34733	0.075818523450084	-17.7704467741837	1.19733362921562e-70	1.07815e-68
SLPI	268.757502649636	3.31552	0.186666968403547	17.761669769084	1.40006805086884e-70	1.25497e-68
PSMA1	1809.38100191949	0.742112	0.0418189621681876	17.7458236806188	1.85657846314482e-70	1.65664e-68
PC	1530.21066187557	-1.21475	0.0686454947037265	-17.6960206564278	4.50002774670076e-70	3.99732e-68
HCCS	349.984175185668	0.772895	0.0436840459407313	17.6928404068922	4.76136727027828e-70	4.2105e-68
SAFB2	2180.29357778446	-0.931923	0.0526860521306694	-17.6882363479915	5.16673916720862e-70	4.54858e-68
LRRC59	2274.42008606875	0.608106	0.0343853887217383	17.6850248951327	5.46969020958376e-70	4.79388e-68
RAB32	392.964640711225	1.73968	0.0983796984040806	17.6833634615277	5.63330584475456e-70	4.91543e-68
RPA3	313.38674201083	1.22491	0.0692842165387103	17.6795516916022	6.02735530121866e-70	5.2361e-68
AARS	5088.59170181953	-0.692314	0.0392261614248529	-17.6492825561843	1.03057059018293e-69	8.91353e-68
SNAI2	166.850711533018	2.45159	0.139024136802812	17.6342564039923	1.34453319100244e-69	1.15783e-67
ATP9A	5010.61603667034	-1.30716	0.0741844652429738	-17.620368202213	1.71882589956887e-69	1.47371e-67
C5orf62	1089.46812889833	1.95755	0.111158539944372	17.6104591982422	2.04777040903208e-69	1.74814e-67
PPARA	656.679892275347	-1.15004	0.0653247475480664	-17.605009416742	2.25470117174799e-69	1.9165e-67
CSMD3	320.294443098692	-3.40633	0.193519330769344	-17.6020277615084	2.37660588680265e-69	2.01144e-67
COL3A1	4873.60589859461	3.57526	0.203199777263021	17.594802093677	2.69997266561724e-69	2.27536e-67
MLX	938.521808833054	0.701207	0.0399194971428361	17.5655146305498	4.52571337906515e-69	3.79775e-67
NTAN1	301.886614739661	1.00548	0.0572507566175715	17.5626878699332	4.75684503181073e-69	3.97479e-67
WDR37	620.929204860116	-0.986401	0.0562015295128052	-17.5511352364025	5.83029158676755e-69	4.8512e-67
HTATSF1	2768.87067535793	-0.941063	0.0536416942267692	-17.5434925953882	6.66991819757237e-69	5.5265e-67
EIF3A	3452.2863279432	-0.917232	0.0523167223695686	-17.5322999378434	8.12168282429854e-69	6.70124e-67
KTI12	241.167109411606	0.682774	0.0389661744523697	17.5222267755145	9.69551471346197e-69	7.96648e-67
RAP1B	1864.0617374252	1.12917	0.0644489550012265	17.5203743423354	1.00164171636712e-68	8.19601e-67
HERC2	2035.35158691062	-0.987097	0.0563613332759506	-17.5137260126291	1.1257805256423e-68	9.17372e-67
CD248	502.338220060785	2.37545	0.135657819480597	17.5106000548452	1.1893372682246e-68	9.65174e-67
ALDH2	5410.1853791184	-1.37638	0.0787028951267513	-17.4882466463098	1.76092134597808e-68	1.42317e-66
FOXO3B	717.85339026391	-1.005	0.0574761039352843	-17.4854780818523	1.84856187754987e-68	1.4879e-66
CRY2	1243.14794395069	-1.30661	0.0747669004557422	-17.4758076236253	2.19022317796885e-68	1.75574e-66
CCDC88A	3445.44304933802	-0.841999	0.0482073002193966	-17.4662150884202	2.59124965660913e-68	2.0688e-66
KIF3A	1043.84504508748	-1.03307	0.0591853650041062	-17.4547856466423	3.16563728001288e-68	2.51719e-66
C6orf115	202.154189037806	1.44126	0.0826125298999084	17.4460448138611	3.68910251461551e-68	2.92165e-66
MXI1	1865.22316079429	-1.16469	0.0667740554177677	-17.4422338513006	3.94354168043858e-68	3.11067e-66
GSTM2	1720.16858537856	-1.3717	0.0787174596483803	-17.4255742291391	5.2775969867724e-68	4.14638e-66
ARF4	3932.46541090588	0.88404	0.0508207596890701	17.3952440704909	8.96440836840712e-68	7.01501e-66
DYNC1LI2	5666.88176300644	-0.877885	0.050497870217434	-17.3846030447085	1.07932038440026e-67	8.41273e-66
NALCN	656.44600015654	-1.8677	0.107476060944255	-17.3777972448485	1.21532745349871e-67	9.43553e-66
ORC5L	407.04592878627	0.797729	0.0459072980447345	17.3769518891979	1.23337207326792e-67	9.53808e-66
PRLHR	69.5744238293642	-5.47825	0.315420905104232	-17.3680551995023	1.44025256274866e-67	1.10944e-65
PER3	893.80645740085	-1.63754	0.0943489463653683	-17.3562481088159	1.76913477062965e-67	1.35577e-65
PSMD14	1507.55876653078	0.681826	0.0392845015076952	17.3560975062999	1.77378042222572e-67	1.35577e-65
TMSL3	41470.5727784264	1.36747	0.0787948504259369	17.3548304890871	1.81334879602776e-67	1.38067e-65
TMEM45A	350.055450854968	1.79947	0.103698736940402	17.3528567371646	1.87674796699853e-67	1.42344e-65
NCRNA00093	23.1103969206485	-3.60995	0.208076926564312	-17.349117040949	2.00299191010619e-67	1.51337e-65
USP34	2363.13752055863	-0.842458	0.0485773262779925	-17.3426142075132	2.2429943433092e-67	1.68824e-65
LOC550643	481.065274683695	0.693572	0.0399990812819893	17.3396938401342	2.35990550744428e-67	1.76948e-65
FLJ90757	1079.80256479579	-1.04637	0.0603865046488065	-17.3278305328967	2.90065695737259e-67	2.1667e-65
LOC646214	83.3300485142268	-1.14732	0.0662355988786647	-17.3218068092326	3.22084124857404e-67	2.39679e-65
CCNB1	635.868867854152	1.93195	0.111569891503638	17.3160543238726	3.55942654399258e-67	2.63879e-65
NPIP	794.108259846516	-1.46933	0.0848992771117638	-17.3067950530726	4.18046285491372e-67	3.08759e-65
TIMM8B	824.5636561952	1.15197	0.0666087909419325	17.2945929522695	5.16666515668932e-67	3.80174e-65
SCD	18006.7907804876	-1.67491	0.0968598488883865	-17.292126750115	5.39254819117908e-67	3.9532e-65
LIMCH1	2951.58919668639	-1.21909	0.0706200241854721	-17.2626437393808	8.98990764765375e-67	6.56596e-65
NSUN6	252.362237823653	-1.34083	0.0777441529518918	-17.2466348419644	1.18609560077103e-66	8.63092e-65
C19orf59	9.68124409629046	5.3249	0.308813614808545	17.2430976048613	1.26095560115534e-66	9.14193e-65
COPB1	2162.28294591511	0.666325	0.0386630804581575	17.2341329786399	1.47244484489594e-66	1.06361e-64
RABEP1	2092.41025538295	-0.593881	0.0344790732785115	-17.224383711131	1.74274060282199e-66	1.25426e-64
C14orf19	6.46052314547782	1.62668	0.0945394868040705	17.2063705299826	2.37881398443877e-66	1.70583e-64
PLAUR	412.660682893914	2.10903	0.122619693896409	17.1997326707512	2.66759351691165e-66	1.90598e-64
TEF	1026.27739697269	-1.41638	0.082407349938661	-17.1875043149355	3.29409979968595e-66	2.34511e-64
TXNDC5	2207.22415504674	1.0978	0.0638739049252548	17.1869471953248	3.32590051208933e-66	2.35924e-64
TUB	1594.63305900565	-1.51057	0.0880727444082287	-17.1513998629877	6.13564610737167e-66	4.33674e-64
SSBP3	611.20539773741	-1.06052	0.0618776365399526	-17.1390511745145	7.58787712071743e-66	5.34403e-64
MMP11	121.686636013928	2.70343	0.157906740739348	17.1203975365985	1.04558873025647e-65	7.33773e-64
SMARCC2	4223.82951257931	-0.713178	0.0416578721108007	-17.1198768604722	1.05498269161464e-65	7.3774e-64
RARS	725.776211230793	0.586932	0.0342936496825976	17.1148993859482	1.14914082785287e-65	8.00744e-64
SSBP1	1248.96521547513	0.776232	0.0453549113084017	17.1146077767335	1.15490986372015e-65	8.0193e-64
PPIL5	155.061294762515	1.15616	0.0675781978974023	17.108496768892	1.28267258714134e-65	8.87519e-64
PELO	386.880172132846	0.61005	0.0356807331301269	17.0974602907243	1.55013723573917e-65	1.06884e-63
GABBR1	5677.05833465603	-1.90219	0.111330146413059	-17.0860343051295	1.88569703643741e-65	1.29568e-63
AHNAK	9367.8960937821	-1.71552	0.100563361473049	-17.0590576652083	2.99345104141956e-65	2.04968e-63
BAZ2B	872.194297890903	-1.00229	0.0587879234061225	-17.0492490914321	3.54052525070443e-65	2.41589e-63
SIK3	1846.35492563055	-0.974396	0.0571592928234508	-17.0470314806682	3.67741636424313e-65	2.50064e-63
MDN1	849.200622647081	-1.33409	0.0782819668278536	-17.0421581590595	3.99705645352674e-65	2.70866e-63
FKBP1AP1	6.02925262128279	-2.42814	0.14249806141126	-17.0398191664877	4.16015892607243e-65	2.80953e-63
LOC650623	95.9276555968736	-1.8324	0.107612662894454	-17.0277386162457	5.114272208937e-65	3.4421e-63
RALGAPA1	570.485063185996	-0.882284	0.0518898148374356	-17.0030323358746	7.79797530148099e-65	5.21275e-63
CASKIN2	1316.10718506903	-1.00389	0.0590800091072502	-16.9919774616115	9.41604697370788e-65	6.27312e-63
BTBD8	9.1281459417155	-2.80672	0.165243420402269	-16.9853659667645	1.05394187411586e-64	6.99789e-63
RPL41	13866.5935020003	1.11374	0.0655799950672723	16.9829190973155	1.09882163650176e-64	7.2714e-63
CALU	4184.81648247679	1.42163	0.0837985875733418	16.964808702156	1.4958601989605e-64	9.86567e-63
CCDC109B	413.745052545458	2.16314	0.127516875921792	16.9635297537143	1.52878392512418e-64	1.00492e-62
ZNF37A	386.088490604255	-1.08242	0.0638107214931489	-16.9629906923573	1.54287629481323e-64	1.01081e-62
TRIM8	2220.18992662118	-0.937241	0.0553022521890288	-16.9476108110817	2.00434994524241e-64	1.3088e-62
GLB1	1057.74945395444	0.880898	0.0519827094394233	16.9459816318611	2.06065653108771e-64	1.34113e-62
SDCCAG1	809.6792749378	-0.83891	0.0495342626196147	-16.9359596543966	2.44340899217007e-64	1.585e-62
COL6A3	850.715598333147	3.5992	0.212585194329658	16.9306160067502	2.67565209032687e-64	1.72996e-62
GBAP1	385.499022981048	-1.02087	0.0603351932164287	-16.9200407448135	3.20208908029048e-64	2.06357e-62
NANP	166.31162218124	0.84162	0.049743613157345	16.9191502412838	3.25087003615703e-64	2.08818e-62
DDOST	3768.19045370499	0.728071	0.0430543894624455	16.9105030802761	3.76480323653095e-64	2.41045e-62
IFNGR2	1637.213546633	1.00908	0.0596998237332914	16.9025109243987	4.3114941443835e-64	2.75154e-62
KIF13A	1025.2851595354	-1.23427	0.0730433715097527	-16.8977005432375	4.67796478589696e-64	2.97579e-62
DCTPP1	719.223278892016	1.07982	0.0639513868885436	16.8850647648879	5.79526853228802e-64	3.67468e-62
SLCO1A2	956.70679890345	-2.50394	0.148313106392714	-16.8828050869384	6.02144330860581e-64	3.80586e-62
PELP1	1731.89194261153	-0.745953	0.0442237928948933	-16.8676760990355	7.77973771527225e-64	4.90148e-62
GOLGB1	2239.42126559358	-0.817247	0.0484679858911037	-16.8615859674091	8.62434545261638e-64	5.41631e-62
EWSR1	4168.57555646435	-0.586123	0.0348002094841374	-16.8425237641436	1.19048953159535e-63	7.42926e-62
CELF2	2567.62065957699	-0.983323	0.0583992346923642	-16.8379436965867	1.28629255020528e-63	8.00179e-62
C20orf111	828.744746696753	0.783299	0.0465377107862576	16.8314969274226	1.4342957082895e-63	8.89444e-62
PCGF1	209.401575262352	0.699123	0.0415463468771423	16.8275550863575	1.53302950477176e-63	9.45204e-62
UBE2A	1758.42602074622	0.675479	0.0401412983325311	16.8275253297037	1.53380002626771e-63	9.45204e-62
C17orf42	171.251159289083	0.870906	0.0517673233557687	16.8234738942599	1.64239390965516e-63	1.00897e-61
PPPDE1	863.263261164814	0.748639	0.0445174093829086	16.8167654668512	1.83930446690296e-63	1.12643e-61
STARD3NL	1678.63838365718	0.83968	0.049978403418295	16.8008491311919	2.40575174200677e-63	1.46877e-61
LARP4B	910.113280831049	-0.78803	0.04691402260528	-16.7973288286842	2.55284493521809e-63	1.55377e-61
DGCR2	4572.51408271679	-0.927392	0.0552593950065626	-16.7825147245948	3.27661938864458e-63	1.98815e-61
KRT10	588.147643502829	0.966114	0.0576170362069562	16.7678455631764	4.19443392786146e-63	2.53725e-61
ZNF652	1063.59536257749	-0.769651	0.0459076652410557	-16.7651936934587	4.38582643012883e-63	2.64491e-61
FBXO22OS	39.1994612785029	1.10021	0.0656317010793258	16.763340096764	4.52474879371212e-63	2.72037e-61
IAH1	652.904408996387	0.879728	0.0524802504625011	16.7630240578432	4.54886885920167e-63	2.72656e-61
PI3	191.612123945624	6.3748	0.380339786737187	16.7608027251707	4.72205450409386e-63	2.82179e-61
GRPEL2	380.696311049188	0.893364	0.0533160745108071	16.7559917471897	5.11999432677766e-63	3.05034e-61
CMTM4	1830.34245820217	-1.34594	0.080387701116187	-16.7431208844644	6.35662526761672e-63	3.76434e-61
NOP10	1032.23722719425	0.99592	0.059488403554531	16.7414063142807	6.54240670771149e-63	3.86276e-61
DNM3	1054.50565226646	-1.7819	0.106500228888486	-16.7314126075575	7.73810478647016e-63	4.55509e-61
MLL	2006.48590539076	-1.14314	0.0683336729649271	-16.7288570237286	8.07734913066651e-63	4.74063e-61
BCR	3291.01721509836	-1.34609	0.0804878564782832	-16.7241781258844	8.73731708047901e-63	5.11276e-61
GNAL	157.84873303944	-2.44746	0.14641212186051	-16.7162656498949	9.97788783415888e-63	5.82142e-61
DIP2C	1147.69464375931	-1.10054	0.0658446599839504	-16.7141566302675	1.03372039622525e-62	6.01326e-61
RPL13AP20	20.1599466741837	-1.42763	0.0854259869877762	-16.711892023762	1.07373937552685e-62	6.22769e-61
GUSB	1144.27438704291	1.16685	0.0698686855003066	16.7006431566555	1.29659613757041e-62	7.4982e-61
PDIA6	4843.28124105691	0.88552	0.0530343797028063	16.6970989895835	1.37593955175567e-62	7.93378e-61
MACF1	7250.16714711201	-0.94959	0.0568798485417004	-16.6946621822434	1.43328122142409e-62	8.24032e-61
SNRPD2	2719.15202163877	1.10886	0.0664809303715913	16.6793962830778	1.85079867541295e-62	1.06098e-60
C7orf30	500.114364165389	0.861828	0.0517361712873437	16.6581385630108	2.64117405950782e-62	1.50532e-60
PIP4K2B	4152.17838251668	-0.692117	0.0415549563842995	-16.6554562025045	2.76229807679651e-62	1.56981e-60
TREM1	146.417583501042	3.60888	0.216784758869633	16.6472915899916	3.16610408704203e-62	1.79413e-60
COPS3	1225.28819244845	0.691728	0.0415540978785144	16.6464341597229	3.21178386303499e-62	1.8148e-60
TMED8	459.413212639696	-0.79162	0.0475683147428568	-16.6417528751443	3.47300948499014e-62	1.95679e-60
SURF6	824.226024929137	-0.775706	0.0466153542966843	-16.6405760016961	3.54194591014058e-62	1.98995e-60
FAM176B	189.589402273042	1.65995	0.0998347048136887	16.6269988797024	4.44298154779617e-62	2.48908e-60
KIF5B	3558.09377487121	-0.790455	0.0476343982672177	-16.5942024283265	7.67566394894754e-62	4.27582e-60
PMM2	363.30887337585	0.885305	0.053350147945823	16.5942370819695	7.6712354204374e-62	4.27582e-60
VPS25	877.169039720421	0.658948	0.0397464727164945	16.5787710995938	9.92374171606401e-62	5.51257e-60
STC1	218.302562496051	3.43266	0.207095789300016	16.5752188073631	1.05279026542308e-61	5.83175e-60
SAA1	380.971985326789	6.20571	0.374810563164965	16.5569224231685	1.42709337527069e-61	7.88299e-60
PHLPP1	3236.07679221563	-1.01918	0.0615649076780387	-16.5545822252158	1.48367756692892e-61	8.17266e-60
CDCA4	202.992035432784	1.35987	0.0821822898211403	16.5470051788408	1.68267451727058e-61	9.24299e-60
NAP1L3	1276.15204411606	-1.3364	0.0808053345714801	-16.5384554038604	1.93931388598565e-61	1.06231e-59
JAGN1	749.797688048195	0.696675	0.0421328041207014	16.5352248960017	2.04613077826546e-61	1.11772e-59
PRTG	165.636371503978	-1.49753	0.0905714354904443	-16.5342068065589	2.08099373027565e-61	1.13362e-59
ARHGEF10L	2130.5883608218	-1.07088	0.0648535533738883	-16.5123421423682	2.99048363857647e-61	1.62458e-59
LOC649330	10.088468451933	-1.51339	0.0916529627532252	-16.5121248121867	3.00127380435051e-61	1.62596e-59
PSMD8	2974.87410995392	0.837506	0.0507266995309092	16.5101540463076	3.10090774615907e-61	1.67534e-59
KCNJ15	10.3504514795383	3.37345	0.204561967723894	16.4910918160982	4.25196178039534e-61	2.29095e-59
PTPN11	5819.12610521943	-0.88438	0.0537058280342744	-16.4671049083103	6.32245860794199e-61	3.39724e-59
LPIN1	1308.12890256706	-1.1109	0.0674843977113685	-16.4616361814852	6.92042404692263e-61	3.70844e-59
CEP290	373.445165442303	-1.02075	0.0620776582776031	-16.4430721002538	9.40291786139815e-61	5.02508e-59
AKAP11	2012.70977662976	-0.964933	0.0586925934773503	-16.4404638086026	9.81647860255985e-61	5.23192e-59
AHCY	2809.74284187655	0.819382	0.0498678893627946	16.4310514234835	1.14653639216839e-60	6.09426e-59
TNK2	3927.02277605569	-1.51971	0.0925084570130184	-16.4277855809869	1.20997390322617e-60	6.41416e-59
TAPT1	1092.60724496375	-0.730513	0.0445099879623404	-16.4123391014658	1.56074739234114e-60	8.25146e-59
SLBP	924.769786080175	0.602279	0.0367110266709938	16.4059428916245	1.73413384832465e-60	9.14361e-59
CALN1	592.451677896665	-2.97898	0.181717227464221	-16.3935118101605	2.12788149869648e-60	1.11898e-58
CD58	255.638497256773	1.68018	0.102524756699625	16.3880118741497	2.32939394141655e-60	1.22169e-58
TBC1D14	3559.96561256517	-0.71004	0.0433382495906886	-16.3836861163555	2.50115193428733e-60	1.30829e-58
PPP1R12B	1146.7240037813	-1.18581	0.0724041684247945	-16.377598412836	2.76444754828901e-60	1.44219e-58
CBX7	1114.92820322044	-1.38239	0.0844536560215714	-16.3685852285588	3.20579773391968e-60	1.66803e-58
SAFB	1897.53533636839	-0.824331	0.050362033342796	-16.3681116597172	3.23083695249731e-60	1.67663e-58
YIPF1	554.063577951209	0.901282	0.0550800795419996	16.3631226157271	3.50676030065527e-60	1.81505e-58
ZCCHC9	271.445648718227	0.798765	0.0488451231801503	16.3530091011708	4.14019910137285e-60	2.13172e-58
MYCBP2	1456.99879937995	-1.13245	0.0692790341694753	-16.3461496677533	4.63348458924868e-60	2.37949e-58
MARCH8	360.696193180631	-1.67363	0.102407824104608	-16.3427612757233	4.89834016726444e-60	2.50897e-58
FCN3	12.1469245564739	3.22984	0.197639398529737	16.3420663463019	4.95449596921397e-60	2.53116e-58
PLP2	975.194184883399	2.13938	0.130928163647258	16.3401396123686	5.11356820187366e-60	2.60567e-58
TGFBI	3173.75987996597	2.58985	0.158548265413749	16.3347540266311	5.58570905249192e-60	2.83892e-58
KIAA1671	842.544601628978	-1.33586	0.0817992104945321	-16.3309072593443	5.94930121428996e-60	3.01594e-58
OPHN1	1538.92158883765	-1.62979	0.0998196492248025	-16.32732895541	6.30865083528196e-60	3.18991e-58
MTSS1L	12187.9494882629	-1.24186	0.0760938403287727	-16.3200952243867	7.10247318763073e-60	3.58212e-58
TCEAL3	1247.99718883064	-0.858112	0.0525911317882873	-16.3166609786515	7.51343897926026e-60	3.77972e-58
OSGIN2	1459.69263178089	-1.27608	0.0782741740770054	-16.3027400639868	9.43651243115623e-60	4.73506e-58
ARHGAP32	1486.66952035479	-1.17141	0.0719056020152417	-16.2909214649368	1.14491102775328e-59	5.73037e-58
COL6A2	4243.56374197662	3.03124	0.186234711245633	16.2764688533916	1.44998009553924e-59	7.23889e-58
THBS1	1182.53912302235	3.04907	0.187562299609175	16.2563240139643	2.0146853260965e-59	1.00327e-57
C8orf76	377.382359227011	0.888816	0.0547116364763627	16.245459647019	2.40531828927215e-59	1.19478e-57
PNO1	490.643876118256	0.786582	0.0484440329171173	16.2369229485301	2.76447322430268e-59	1.36973e-57
PCDHGB4	105.835604077904	-3.5468	0.218467263411471	-16.2349391456596	2.85530955800373e-59	1.4112e-57
MCF2L2	217.622168971546	-2.28754	0.141130048229178	-16.2087271210212	4.37537026639866e-59	2.15706e-57
C12orf51	1641.89893411838	-1.06994	0.0660446196514218	-16.200297210668	5.01839451334128e-59	2.4679e-57
MOSPD1	232.508739554805	0.753304	0.0465277199247518	16.1904408557699	5.89050307544771e-59	2.88957e-57
SORL1	6221.41729904592	-1.25844	0.0777384449343965	-16.1881593460936	6.1129979898333e-59	2.99127e-57
DHRS4	374.422886846998	-1.1373	0.0702598981730104	-16.1870133425231	6.22789639735674e-59	3.03995e-57
SPHKAP	289.928162875447	-3.26746	0.20187158006132	-16.1858278811321	6.34901501343976e-59	3.09142e-57
MYH7B	67.7464588548597	-2.34318	0.144829319191016	-16.1789130402324	7.1037463949435e-59	3.45039e-57
RPN1	4974.44223438003	0.627761	0.0388197374711447	16.1711696782772	8.0554319269271e-59	3.90303e-57
SYNE1	2076.2524738054	-1.22056	0.0754854804542324	-16.1694683246689	8.28098972108958e-59	4.00248e-57
RPS27A	5106.23477880697	-1.05643	0.0653446173804721	-16.1670165506161	8.61714542668322e-59	4.15477e-57
RFC2	836.353652490913	0.973858	0.0602574036556282	16.161627461896	9.40456987280114e-59	4.52337e-57
OR51E1	22.4856012497424	3.75937	0.232636576730968	16.1598466522928	9.68021671568597e-59	4.64462e-57
ZNF518A	471.839141523134	-0.910189	0.0563686714765203	-16.147063377545	1.19098257750856e-58	5.70053e-57
LOC493754	534.939231091023	0.680082	0.0421728890152129	16.1260498694755	1.67390084743391e-58	7.99257e-57
HDAC11	988.095140361225	-1.21968	0.07563671975665	-16.1255518555676	1.68744957605777e-58	8.0378e-57
CHD2	2210.68161533271	-0.887351	0.0550545727726147	-16.1176661830881	1.91713797196263e-58	9.10987e-57
TUBA1B	33565.9803694008	1.00521	0.0624196905187136	16.1039829044766	2.39198899558756e-58	1.13389e-56
TSPAN4	413.98646854312	1.07983	0.0670549305430024	16.1036101262597	2.40644692198241e-58	1.13801e-56
DOCK10	1530.98107465365	-1.17639	0.0730839091316512	-16.0964706446002	2.70077126009752e-58	1.27414e-56
BCL3	289.065637885821	1.62341	0.100899927635179	16.0893020727267	3.03236387136301e-58	1.42717e-56
C22orf46	728.279447824226	-1.14968	0.0714810359493641	-16.0836387229618	3.32275801723717e-58	1.56011e-56
CASP4	327.621803708223	1.72469	0.107246417830116	16.0815784796223	3.43513554637893e-58	1.60905e-56
NUP54	607.459041929332	0.59363	0.0369161257773906	16.0805056872688	3.49514271754093e-58	1.63328e-56
ITGB3BP	199.161009906367	1.06309	0.066113205408365	16.079777641799	3.5364599630444e-58	1.64868e-56
PTGIR	16.5236706563385	1.89837	0.118179002166732	16.0634951346749	4.59890473547895e-58	2.13892e-56
MMP9	521.944227896102	4.111	0.255972834289457	16.0603079668746	4.84141518006915e-58	2.24642e-56
OSBPL2	1261.58183580039	-0.592205	0.0368939221972476	-16.0515610982654	5.57441204158042e-58	2.58046e-56
MRPL42	603.553556649975	0.803808	0.0501101256355343	16.0408253951643	6.62677304884404e-58	3.06042e-56
SPEN	2447.7613956047	-0.997838	0.062227029340863	-16.0354459660184	7.22629774665757e-58	3.3295e-56
SLC30A5	704.147413297283	0.649519	0.0405196348986113	16.0297257204707	7.92316882274069e-58	3.64207e-56
KIF1C	3514.73011172048	-1.04723	0.0653434279198083	-16.0264803135516	8.34789892859762e-58	3.82839e-56
TNRC6B	937.727548851321	-0.917552	0.0572744108988641	-16.0202730411499	9.22443345304575e-58	4.22055e-56
REPS2	591.571890065259	-2.09748	0.130973283076557	-16.0145865179652	1.01076399173604e-57	4.61395e-56
SLC12A6	809.316170284161	-0.847269	0.0529263710489316	-16.008449607463	1.11555057618065e-57	5.08052e-56
ZBTB4	2704.23726624521	-0.614671	0.0384016334753206	-16.006364047084	1.15357033995282e-57	5.24157e-56
CASP3	949.802871224257	1.01989	0.0637379464418116	16.0013372528237	1.25059762095892e-57	5.66938e-56
STOX1	452.347933716338	-2.14313	0.133953432853544	-15.9990907171754	1.29654873564895e-57	5.86421e-56
FAM90A7	0.889207605028196	3.18687	0.199279741310425	15.9919619787669	1.45379312881588e-57	6.54539e-56
CLCN6	1411.54565334372	-0.846331	0.0529412126030436	-15.9862323329581	1.59383578147856e-57	7.15955e-56
HNRNPUL2	3052.03841069295	-0.78853	0.0493438733539031	-15.9803103129282	1.75271229891371e-57	7.85534e-56
AP2S1	1473.96474514101	0.918703	0.0575520539029179	15.9630003517866	2.31337769853387e-57	1.03446e-55
USP54	2171.64398645759	-1.41569	0.0887333145616876	-15.9544247632253	2.6540777692822e-57	1.18413e-55
CAPZA2	4032.57242209364	1.0015	0.0627799659872464	15.9525774078348	2.7337763399188e-57	1.21693e-55
S100A4	421.053893817805	2.47282	0.155070107225162	15.9464951474938	3.01340769561642e-57	1.33839e-55
KCNN3	372.757197015925	-1.76055	0.110432417111224	-15.9423334363792	3.22098305301494e-57	1.42737e-55
FAM192A	2358.3684225787	-0.582131	0.0365589992871697	-15.923065803084	4.38360739324047e-57	1.93713e-55
SLC22A6	43.6905159029446	-3.64128	0.228681331652922	-15.9229611050658	4.39095008312175e-57	1.93713e-55
NRG3	269.381717816628	-2.18828	0.137455997067395	-15.9198714286647	4.61323895595617e-57	2.03065e-55
VPS29	1072.42713218591	0.814951	0.0512120084845031	15.9132859127008	5.12514919050457e-57	2.25096e-55
ZNF248	377.925448191131	-1.07325	0.0674698800383069	-15.9071237747025	5.65525283577957e-57	2.47826e-55
BZRAP1	1068.84613287432	-1.80453	0.113526050167317	-15.8952984790536	6.83023612551923e-57	2.97992e-55
CANT1	1159.28341654658	0.751989	0.0473298053632433	15.888280088341	7.63950062072762e-57	3.32563e-55
MAPT	6872.32291417904	-1.43067	0.0900484714547071	-15.8877944685863	7.69890498988515e-57	3.34411e-55
RSF1	753.338236493131	-0.950632	0.0598705492954203	-15.8781229308045	8.98264996978738e-57	3.89314e-55
HSP90AB2P	21.2565652304901	-1.48054	0.0933054832393913	-15.8676760287396	1.06097203797179e-56	4.58824e-55
CDKN3	135.662827338654	2.02014	0.127346894750497	15.8632730644783	1.13804966648865e-56	4.9108e-55
C14orf119	801.667034943134	0.799486	0.050428330807167	15.8539057443692	1.32108653855818e-56	5.68817e-55
LRSAM1	749.216837290893	-0.772816	0.0487588406329389	-15.8497688471904	1.41098901842825e-56	6.06203e-55
ASH1L	2018.81621459211	-0.89706	0.0566197419135126	-15.8435890595664	1.55676029571606e-56	6.67376e-55
CYS1	96.6336770689422	-2.06475	0.130361694750727	-15.8386072158846	1.6851200938691e-56	7.20837e-55
LOC339674	318.926035393267	-1.70558	0.107707415849453	-15.8353410947868	1.7749405514471e-56	7.57615e-55
ERCC5	871.978610996788	-0.763525	0.0482289747229112	-15.8312487976002	1.89424040800018e-56	8.06791e-55
C4A	11686.2720097055	-1.90715	0.120541643451421	-15.8215061197323	2.21138715998454e-56	9.3984e-55
PELI2	472.485103513689	-1.13362	0.0716630547504826	-15.8187615621347	2.30991652385378e-56	9.79603e-55
SPTBN1	13621.4800248019	-0.865255	0.0546989387170442	-15.8184971881481	2.31963536477047e-56	9.81614e-55
LOC92973	208.560757840574	-1.4299	0.0905480951245569	-15.7916464890645	3.55186479514654e-56	1.49985e-54
ZDHHC4	1339.91370538929	0.675137	0.0427592082832571	15.7892797530307	3.68766447142647e-56	1.55386e-54
TBCA	1572.09713012483	0.811091	0.0514563228621193	15.7627116770075	5.61702402222488e-56	2.35676e-54
NCAM1	12605.8477901062	-1.13705	0.0721575101678054	-15.757932084048	6.05830941701735e-56	2.53652e-54
SEPHS2	1022.33333888438	0.583507	0.0370329635566974	15.7564305257212	6.20394670507156e-56	2.59199e-54
CASP6	153.12049655009	1.13007	0.0717850533602625	15.7423816199163	7.74720825489898e-56	3.22844e-54
NEK1	707.437292210081	-0.815354	0.0517938739646706	-15.7422768172338	7.76005169835149e-56	3.22844e-54
UBXN1	2329.98506170936	-0.837756	0.0532205563200395	-15.741218723472	7.89091363994943e-56	3.27598e-54
EZH1	1139.09136515429	-0.740823	0.0470732821805484	-15.7376606185607	8.3473053704182e-56	3.45187e-54
GPR39	55.2254863147268	2.11892	0.134639956896922	15.7376432799328	8.34959253067333e-56	3.45187e-54
GEMIN7	277.249573521159	0.909624	0.0578400581791182	15.7265353789397	9.95090699681553e-56	4.10527e-54
POU2F1	102.130260755704	-1.19265	0.0758491267137083	-15.7239380692069	1.03674477307466e-55	4.26819e-54
MAPK13	73.9332669508283	1.80451	0.114814361940665	15.7167561310439	1.16118562170476e-55	4.76062e-54
CENPL	163.838919093159	1.08264	0.0689461991705461	15.7026921001822	1.44957693822197e-55	5.93063e-54
WTAP	2093.96253965306	0.90601	0.0577231286033553	15.695782866857	1.61636215519518e-55	6.59931e-54
LRRC8A	5456.06269792028	-1.08888	0.0694056322045789	-15.6886560256937	1.80843990824488e-55	7.36827e-54
SAA2	133.008468838481	6.13275	0.391230823981994	15.6755324912953	2.22353711948027e-55	9.04086e-54
CCDC85A	174.225269769835	-2.02983	0.129500005378714	-15.674379350664	2.26425917952184e-55	9.18749e-54
PINK1	4771.66364891251	-0.861353	0.0549805933552596	-15.666486058616	2.56366690648342e-55	1.0381e-53
PIGC	562.995893180076	0.678644	0.0433381134926721	15.659295214036	2.87060687815145e-55	1.16001e-53
SMC3	1177.71790628824	-0.938567	0.0599650005544583	-15.6519117750778	3.22387322045779e-55	1.3001e-53
DZIP3	834.80002480727	-0.861284	0.0550402718297162	-15.6482447258832	3.41509580454741e-55	1.3744e-53
MICAL3	1984.45293888264	-1.08649	0.0694388992882382	-15.6467176894244	3.49801837480098e-55	1.40491e-53
C4orf6	4.31731410038481	4.09344	0.261622311117207	15.6463894588865	3.51610244450608e-55	1.4093e-53
LASS5	1136.27245382408	0.67153	0.0429259701375143	15.6439007657882	3.65628234339014e-55	1.46251e-53
TAOK2	1904.27615388467	-0.649049	0.0415027392242568	-15.6386925678155	3.96791257602836e-55	1.58395e-53
TMEM70	495.768177274748	0.952084	0.0608914957375379	15.6357453553749	4.15583481555428e-55	1.65562e-53
ANKRD12	903.010209200534	-0.810553	0.0518684103418436	-15.6270993896383	4.75982425195513e-55	1.89241e-53
BOLA3	240.426384850345	0.900793	0.0576478865246155	15.6257694384901	4.86019016587404e-55	1.92843e-53
NNMT	1348.91632606412	3.33435	0.213407384695042	15.624363848756	4.96855589888832e-55	1.96747e-53
LOC154761	55.3750497384761	2.1694	0.138855732219178	15.623387781926	5.0452194547887e-55	1.99382e-53
BTRC	817.138898230623	-0.822725	0.0527114014919825	-15.6081019559004	6.41161837571643e-55	2.52522e-53
PDIA3P	1588.55594476392	0.832458	0.0533351523793053	15.6080635247758	6.41548111949028e-55	2.52522e-53
RNFT1	273.865359840723	0.871554	0.0558533116319098	15.6043446802398	6.80044068126199e-55	2.67141e-53
HAUS1	383.653249514525	1.01619	0.0651364909288627	15.6009669286495	7.16998852518099e-55	2.81098e-53
ITPK1	3726.07374131322	-1.035	0.0663713997304577	-15.594140059597	7.9790604906593e-55	3.12197e-53
psiTPTE22	528.046593667123	-3.58676	0.230024158908077	-15.5929542830917	8.12858257381884e-55	3.17417e-53
HEXB	1405.01118496208	1.1404	0.0731828961808563	15.5829011061257	9.51371545901665e-55	3.70772e-53
GRIPAP1	1179.15259000633	-0.684567	0.043934673305846	-15.5814640593111	9.73004280090925e-55	3.78455e-53
MUM1	2148.08745684282	-0.795178	0.0510478935245886	-15.5770959361331	1.04181411221738e-54	4.04421e-53
FAM115C	321.160869459969	2.03745	0.130818019787678	15.574661416373	1.08224583033546e-54	4.19291e-53
ZHX2	1621.03974736743	-1.0773	0.0691904753464038	-15.5700312199541	1.16350419362209e-54	4.49888e-53
HEBP2	442.435867592511	1.10316	0.0708712545076331	15.5656871474811	1.24525583791139e-54	4.80557e-53
CEP68	1003.62193938068	-0.653409	0.0419851201398011	-15.5628639592096	1.30142758302506e-54	5.01253e-53
FKBP1A	3846.58332763272	0.730331	0.0469429724882813	15.5578360255186	1.40778665081839e-54	5.41161e-53
NIPBL	1302.89936299528	-0.733114	0.0471368125171574	-15.5529015750603	1.52057806069522e-54	5.83381e-53
BRWD1	1402.43573966323	-0.665814	0.0428209775595299	-15.5487713574122	1.62187412351673e-54	6.19833e-53
KCNB1	162.25081944393	-2.27875	0.146554712571056	-15.548803667349	1.62105618927013e-54	6.19833e-53
IL10RB	604.226633687418	0.822507	0.0529003322676566	15.5482359945196	1.63548695453563e-54	6.23826e-53
OST4	2105.92706824311	0.906957	0.0583324999247449	15.5480515022225	1.64020440941784e-54	6.24418e-53
SIRT1	478.515772739173	-0.807087	0.0519250252290758	-15.5433091030159	1.76622991629594e-54	6.71099e-53
ATM	1198.51482285394	-0.782137	0.050365809951328	-15.5291307386952	2.2034639864097e-54	8.35621e-53
ACTL6A	812.954551789303	0.883458	0.0568984373820615	15.5269347883346	2.28021496073026e-54	8.63068e-53
PSMA7	3163.21260381636	0.758434	0.0488739048955777	15.5181706816336	2.61397235816473e-54	9.87501e-53
FKBP11	165.355686540493	1.24371	0.0801660766530878	15.5141080156256	2.7847765480124e-54	1.05002e-52
SLTM	1503.85807848754	-0.63279	0.0408162427772542	-15.5033832033858	3.29096857027813e-54	1.23851e-52
COX7B	1638.38553840913	1.1273	0.0727383914350728	15.4979382222471	3.58203521296159e-54	1.34292e-52
SPIRE1	2433.47250326165	-0.984626	0.0635666828716596	-15.4896550817035	4.07470632040721e-54	1.52473e-52
BEND7	280.109754845205	-1.13117	0.0730390118109251	-15.4872205947133	4.2319419303324e-54	1.58057e-52
DDX42	2897.25418170315	-0.621249	0.0401395598485128	-15.4772143357907	4.94422917199943e-54	1.8431e-52
CKS2	406.900100483382	1.72867	0.111731580825361	15.4716440297462	5.39123993397954e-54	2.00595e-52
SEP15	3361.3254029183	0.939671	0.0607366162285335	15.471241860094	5.42502945135925e-54	2.01472e-52
DLL1	1192.27323338977	-1.98596	0.12837641964246	-15.4698515428554	5.54347427086671e-54	2.05484e-52
PLA2G6	531.215694486118	-1.00202	0.064806615053265	-15.4616280113313	6.2986277822669e-54	2.33037e-52
CDH20	857.745145285401	-1.80798	0.117001315969042	-15.4526385260423	7.24173106512475e-54	2.67429e-52
ZMIZ1	4188.72429849248	-0.970206	0.0627887466958808	-15.45190734203	7.32435913300631e-54	2.69975e-52
NSMCE2	251.774480747814	0.890696	0.0576876805975848	15.4399610090523	8.81535432439922e-54	3.23722e-52
AMY1A	2.12300844920364	-3.68257	0.238555880099032	-15.4369331547042	9.23901143013814e-54	3.38649e-52
LUM	529.937995908475	2.95405	0.191389102362921	15.4347648629541	9.55479986571989e-54	3.49574e-52
CKS1B	356.386787893022	1.281	0.0830496152109189	15.4244569142781	1.12094125767158e-53	4.09351e-52
TRAM1	2895.93190994766	0.898187	0.0582646286040368	15.4156427495018	1.28486094110081e-53	4.68345e-52
KIAA1147	2060.38290032563	-0.933919	0.0606041166464308	-15.4101576592703	1.39870189051671e-53	5.089e-52
FAM109B	129.982434865694	1.50419	0.0976142107814455	15.4094990150123	1.41303033160005e-53	5.13167e-52
C14orf142	235.145583514746	0.962252	0.0624649325806941	15.4046744436191	1.52253957669019e-53	5.51921e-52
ARPC1A	2550.57863908885	0.621396	0.0403769861238721	15.3898639248399	1.91434437906176e-53	6.91408e-52
TDO2	54.127124763169	3.04217	0.197828320552109	15.3778324290214	2.30537077567974e-53	8.31114e-52
ATP5J2	2447.43144942712	1.0734	0.0698493654503009	15.3673365448827	2.71086424303453e-53	9.75515e-52
C19orf10	1347.20394543569	0.881781	0.0574270093284822	15.3548194854326	3.288235538822e-53	1.18113e-51
TMEM136	577.872918427049	-0.816503	0.0531992276764209	-15.3480145681691	3.65193010946088e-53	1.30938e-51
C14orf129	359.958214203075	0.898447	0.0585403460742938	15.3474787739371	3.68221207549479e-53	1.31784e-51
KPNA2	1876.44598689535	1.08169	0.0704886145376843	15.3456376449333	3.78818739515589e-53	1.35332e-51
C7orf41	9442.99382196916	-1.67682	0.109410653110254	-15.3259609530532	5.12903643808282e-53	1.82902e-51
ARHGAP12	1334.52501316987	-0.883224	0.0576344243381129	-15.3245991335618	5.23766714406277e-53	1.86102e-51
GNAO1	3948.25647066996	-1.29222	0.0843228475701617	-15.324676758042	5.2314140142139e-53	1.86102e-51
BOD1L	1087.87724351827	-0.818624	0.0534244592147642	-15.3230223846084	5.36630740188849e-53	1.9033e-51
FER1L4	31.2057410351898	2.92676	0.191062388141585	15.3183398533408	5.76717690735039e-53	2.04181e-51
RAPGEF2	1284.59314204785	-0.864827	0.0564672270050636	-15.3155553989366	6.01954878386175e-53	2.12734e-51
PATZ1	1502.98992749864	-0.838859	0.054774403054081	-15.3147967442387	6.09019655613097e-53	2.14846e-51
FARS2	245.229379114651	0.600017	0.0391924200667331	15.3095220298795	6.60475090738267e-53	2.32582e-51
CYP21A2	113.369274774387	-2.04171	0.13340264410127	-15.3048803596217	7.09323068574982e-53	2.49338e-51
GABRG1	487.797338754295	-3.25432	0.21271961697315	-15.29863492963	7.80770992826334e-53	2.73964e-51
ZNF530	82.9327268841904	1.07007	0.0699567636077065	15.2961012017983	8.11760622153924e-53	2.84332e-51
FAM123A	612.155539862648	-1.66055	0.108612742628948	-15.2886883498855	9.09637743032125e-53	3.18051e-51
KDELR1	2694.93723417611	0.736634	0.0481933151716449	15.2849823310225	9.62890921638679e-53	3.36074e-51
OCIAD2	723.38392746802	2.50584	0.164023040824456	15.2773693015608	1.08222046542549e-52	3.76391e-51
SEC24D	556.182188188251	1.29845	0.0849914576726167	15.277406207664	1.08160785933826e-52	3.76391e-51
COMMD7	1291.60697705467	0.812763	0.0532211911053419	15.2714082637578	1.18584205071431e-52	4.11704e-51
NEU1	1222.4920758748	0.797007	0.0522004432210907	15.2682094872223	1.24546075292274e-52	4.31643e-51
NFAT5	1184.22637427663	-0.795912	0.0521318244303833	-15.2672876054195	1.26319026508762e-52	4.3702e-51
CNIH	1116.7761496502	0.8334	0.0545887232464607	15.266883391823	1.27104309068214e-52	4.38966e-51
DNAJC12	249.425847403384	-1.25153	0.0819949444526632	-15.2634679185022	1.33936759325276e-52	4.61754e-51
FLJ16779	2886.60438058771	-2.50444	0.164102724711824	-15.2614231384062	1.3820097085485e-52	4.75624e-51
ANXA2P2	1829.33849305794	2.13494	0.139925705461561	15.2577036251307	1.46307238593004e-52	5.02644e-51
RARRES1	79.0124545120004	2.64058	0.17307434790583	15.2569318748434	1.48047590671649e-52	5.07739e-51
GLRX	662.84545772917	1.3292	0.0871930689775684	15.2443578940593	1.79488769908312e-52	6.145e-51
ACVR2B	468.803500204748	-1.28193	0.0840980271945092	-15.2433329585053	1.82327272236051e-52	6.23136e-51
DAP	2417.43318595887	0.684049	0.0449179479831467	15.2288483690276	2.27564666554672e-52	7.76397e-51
TMSB10	12037.4871142428	1.36952	0.0900031815091652	15.216376908567	2.75364316225575e-52	9.37856e-51
ZNF410	1082.56910070426	0.749202	0.0492578846937351	15.2097883826158	3.04525922755953e-52	1.03539e-50
CEP350	1150.98375011883	-0.827196	0.0544051461072698	-15.2043620930373	3.30837730479952e-52	1.12291e-50
ALG3	572.20066541529	0.762173	0.0501456216387196	15.1991969505189	3.57982558534671e-52	1.21088e-50
S100A9	544.237118516405	2.78581	0.183351655845686	15.1938107308963	3.88653190996931e-52	1.31237e-50
KDELC1	143.934681048259	1.09889	0.0723307426792691	15.1925103339043	3.96441865553073e-52	1.33638e-50
ZER1	1939.93577741038	-0.654315	0.043082340193479	-15.1875523755401	4.27589909163495e-52	1.43892e-50
ACADSB	529.817674029032	-0.903597	0.0595092786999364	-15.1841328818973	4.50480926213074e-52	1.51337e-50
GEMIN6	175.578028292343	0.817002	0.0538116134502645	15.1826381782845	4.60866312096589e-52	1.54563e-50
MPV17	1234.85085717785	0.657736	0.0433571180501763	15.1701971603895	5.57092269507269e-52	1.86517e-50
COQ2	195.628972532742	0.755814	0.0498271635759522	15.1687101256123	5.69857072799389e-52	1.90467e-50
KISS1R	12.8612873603055	4.12995	0.272384380410167	15.1622052178727	6.29207292183364e-52	2.09949e-50
ZNF25	626.399195799352	-0.955008	0.0629962431014424	-15.1597691058932	6.52984855922775e-52	2.17515e-50
ARHGAP5	2530.90879307512	-0.893771	0.0589762478389948	-15.1547666450351	7.04652519617573e-52	2.3433e-50
DEPDC5	318.430733200205	-0.721509	0.047611492517542	-15.154099885384	7.11839730567372e-52	2.36321e-50
ZNF788	111.007111238103	0.962118	0.0634926724401409	15.1532148042155	7.21493171919225e-52	2.39123e-50
ABLIM3	1031.55780383767	-1.59024	0.104955534346203	-15.151518334723	7.40362142353485e-52	2.44965e-50
SGIP1	311.630059196207	-1.28656	0.0849272593435606	-15.1489521917653	7.69841810313152e-52	2.54293e-50
FAIM2	5167.13496742288	-1.49341	0.0986067232254434	-15.1451237765028	8.16008521032219e-52	2.69092e-50
ERCC6	165.911002314594	-0.970725	0.0640984299943913	-15.1442813969311	8.26531089762767e-52	2.72107e-50
RASL10A	296.805587766041	-2.23708	0.147760871952842	-15.139849718326	8.84155078134492e-52	2.90592e-50
SUFU	613.379429897093	-0.799855	0.0528449039257937	-15.1359031958396	9.38828595131972e-52	3.07537e-50
KLF13	2292.379159698	-0.850269	0.0561842812930592	-15.1335728712311	9.72679302456956e-52	3.18097e-50
LRIG1	11315.8587739618	-1.23262	0.0814708344679276	-15.1295460342655	1.03406260588754e-51	3.37611e-50
CSTF2T	947.187013161177	-0.680465	0.0449798804198295	-15.1281984939388	1.05545335599154e-51	3.44025e-50
LOC388955	337.564870479314	0.771706	0.0510118318865802	15.1279846629549	1.05888796141862e-51	3.44575e-50
RAP2B	754.027545484863	0.713019	0.0471352264160478	15.1270987810783	1.07323616725021e-51	3.48669e-50
PURA	352.562342676233	-0.64243	0.0424710154113816	-15.1263068324944	1.08622677522083e-51	3.52309e-50
SATB1	1273.56445546031	-1.32278	0.087473787815693	-15.1219983819298	1.1596916080818e-51	3.75519e-50
ZNF552	64.9411344815883	0.832653	0.0550666530956077	15.120829466003	1.18046262467624e-51	3.81618e-50
MDK	2113.71852319445	1.90747	0.126155558632201	15.1200139011415	1.19517375584941e-51	3.85742e-50
THRA	7301.97092937673	-1.24374	0.0822644503455505	-15.1187555505366	1.21823072289663e-51	3.92541e-50
MADD	1647.55824809154	-0.832877	0.0551018611883809	-15.1152261383902	1.28529098901922e-51	4.13474e-50
INSIG2	573.518187328093	0.680792	0.045049862375191	15.1119745012273	1.35032106538725e-51	4.33686e-50
NF1	2259.73565632114	-0.936161	0.0619699860597216	-15.1066847559661	1.46318269486513e-51	4.6917e-50
LRRC27	325.680562250894	-0.859712	0.0569277235559624	-15.1018113820094	1.57545248178433e-51	5.04349e-50
LGALS3	2547.3908908418	2.3013	0.152566971091925	15.0838680258867	2.06790779324201e-51	6.60926e-50
LOC283070	644.565939645143	-1.16879	0.0775015859013891	-15.0808249150272	2.16546398616455e-51	6.90986e-50
PTS	275.900886002072	0.876603	0.0581311424388223	15.0797568593945	2.20077914710341e-51	7.01121e-50
ZNF609	1383.6569522275	-0.929289	0.061664516859131	-15.0700711313536	2.5483853052776e-51	8.10551e-50
PLIN1	82.8081148083901	-2.3659	0.157018082170761	-15.0676779903778	2.64237816229595e-51	8.39093e-50
GPX8	257.666268158655	2.59595	0.172400506453656	15.0576973547571	3.0730526564664e-51	9.72722e-50
GPT2	3281.9775016031	-1.00487	0.06673919573565	-15.0566751725753	3.12092647951887e-51	9.86293e-50
MRPL39	373.027282534442	0.649456	0.0431402686626042	15.0545204215624	3.22429026992136e-51	1.01733e-49
C14orf109	325.83910449068	0.655798	0.0435746225506363	15.0499870108099	3.45302093069321e-51	1.08776e-49
SCG3	7026.67196858846	-1.94788	0.129431905475894	-15.0494340811906	3.48200171345585e-51	1.09514e-49
POLR2L	1444.08765182445	1.08452	0.0720971846511934	15.0424391912247	3.87022593900613e-51	1.2153e-49
RP9	222.025677293231	0.784074	0.052129772892581	15.0408097882109	3.96667869965719e-51	1.24361e-49
MTA3	1058.21048304236	-0.616009	0.0409637818032453	-15.0378909967305	4.14547869961178e-51	1.2976e-49
MYCBP	295.775801831207	0.928894	0.0618075748479049	15.0288004343633	4.7553927690741e-51	1.48615e-49
LOC100216001	4.89346270028867	2.79813	0.186203200997362	15.0272760884899	4.86607557959569e-51	1.51834e-49
ABR	5601.15457650529	-0.895634	0.0596026656871217	-15.0267361904906	4.905889607687e-51	1.52834e-49
TTC35	838.929645601165	-0.689861	0.0459491015893722	-15.0135964937079	5.98145644200325e-51	1.86048e-49
CLEC16A	1019.71253776307	-0.771805	0.0514200258663629	-15.0098179574282	6.33212505133506e-51	1.96645e-49
NEURL4	917.753128100035	-0.765903	0.0510339537119847	-15.0077152123549	6.53605900295292e-51	2.02659e-49
TAF3	202.56026365486	-1.0198	0.0679821323594273	-15.000970932744	7.23531177098649e-51	2.23988e-49
C5orf15	1242.24343978055	0.762611	0.0508426747941016	14.9994247243546	7.40584138829692e-51	2.28908e-49
TM9SF3	2965.5328480837	-0.589111	0.0393123700709953	-14.9853754684527	9.1506971215432e-51	2.82397e-49
FBXO4	233.341334046169	0.97293	0.0649261804046127	14.9851672719478	9.17941721115812e-51	2.82841e-49
PLEKHM3	508.630121005657	-0.953992	0.0636773330982555	-14.981660205055	9.67691909513992e-51	2.97705e-49
SEMA3G	231.624315033985	-1.80192	0.120310454867368	-14.9772603497795	1.03391969016588e-50	3.17584e-49
HINT1	3714.00887432998	0.84663	0.0565362987167839	14.9749782537783	1.07002830221498e-50	3.28154e-49
MRPS12	536.60211807777	0.972836	0.0649645139340949	14.9748769743488	1.07165957884239e-50	3.28154e-49
GIGYF2	1536.65901585076	-0.639514	0.0427433742995482	-14.9617166584018	1.30612861278036e-50	3.98713e-49
IGFBP4	1887.15868873122	1.68719	0.112873572200088	14.947646348325	1.61351840883761e-50	4.91786e-49
C1GALT1C1	371.18684589183	0.73424	0.0491216907370463	14.947375823794	1.6200852153573e-50	4.93026e-49
PHYHIPL	4047.34626076854	-1.53004	0.102374805244348	-14.9455156644549	1.6659655836698e-50	5.06207e-49
LGALS1	5144.7958652728	1.712	0.114572217173751	14.9425037215315	1.74301290839494e-50	5.28803e-49
C10orf18	1065.70275886639	-0.856006	0.0573059900272482	-14.9374596198294	1.88006927401202e-50	5.68634e-49
HABP4	1381.1930997155	-0.782893	0.0524112093752247	-14.9375117200007	1.87860019275485e-50	5.68634e-49
UQCRQ	2082.14116241102	0.995367	0.0667432587570176	14.9133744682442	2.69767174371044e-50	8.14672e-49
DPP4	121.501833007135	2.84087	0.190500256896834	14.9126694413337	2.72631266943896e-50	8.22062e-49
SBF1	3126.10955717152	-0.928374	0.0622575265256438	-14.9118279914409	2.7608921384937e-50	8.31218e-49
CCRN4L	74.5734956748292	1.01209	0.0678861788357595	14.9085958468691	2.89782568733848e-50	8.71115e-49
PNMAL2	575.944766713962	-1.51947	0.101923992269891	-14.9078500015303	2.93037238879232e-50	8.79558e-49
SNRNP40	755.260333131073	0.662918	0.0444764917751155	14.9049134318198	3.06209219267722e-50	9.17697e-49
DPM1	432.842636322152	0.600521	0.0402930062848681	14.9038548295034	3.1110074781607e-50	9.30942e-49
ARPC5	3301.98342936921	0.896698	0.0601715013971561	14.9023636065907	3.18123555114047e-50	9.50515e-49
BPTF	1770.58066015148	-0.800767	0.0537470951748365	-14.8987867977704	3.35618226757534e-50	1.00127e-48
NODAL	53.065352329398	2.16026	0.145097527174022	14.8883021816347	3.92613293996379e-50	1.16954e-48
RQCD1	277.349076695977	0.633915	0.0425985266278379	14.8811370509819	4.3700875442464e-50	1.29982e-48
ALG6	285.764930343647	0.963483	0.064750725256108	14.8798739387152	4.45337806846512e-50	1.32061e-48
CD70	21.8548781910376	4.8149	0.32358282319304	14.8799564575169	4.44788879397481e-50	1.32061e-48
MAP1A	7087.29083242652	-1.19895	0.0805940814839656	-14.8764285648999	4.68869008383311e-50	1.3883e-48
FKBP9	2588.1979221224	1.49357	0.100416633379775	14.8737508094798	4.8800893064722e-50	1.44281e-48
YLPM1	1920.27717215905	-0.824541	0.0554625380874867	-14.8666204541112	5.42853061783969e-50	1.60255e-48
GBF1	1678.59312491233	-0.776607	0.0522638630637278	-14.8593439618285	6.05148746891147e-50	1.78379e-48
ERBB4	724.877026578416	-1.79672	0.120917574393263	-14.8590862012037	6.07481428375468e-50	1.78798e-48
GTF2E2	361.141924666339	0.670348	0.0451139564253591	14.8589865140158	6.08385975785244e-50	1.78798e-48
FAM21C	1082.1809690616	-0.771935	0.0519552786980378	-14.8576741419025	6.20420026382698e-50	1.82007e-48
KIAA2026	724.803652681522	-0.900123	0.0605855665057079	-14.8570523988259	6.26203657681483e-50	1.83216e-48
PBLD	173.457911130513	-0.922863	0.0621365778157677	-14.8521676011656	6.73550745849747e-50	1.96777e-48
C20orf30	2489.688668925	0.759075	0.0511357095644397	14.8443214298377	7.57170868296912e-50	2.20553e-48
HUS1	293.62192420181	0.65041	0.0438525532518006	14.8317442956541	9.13285898628453e-50	2.65634e-48
IGFBP2	5920.77147082575	2.64184	0.178174505806119	14.82723809029	9.76695437833714e-50	2.83659e-48
HMOX1	2190.29486293999	1.64972	0.111301072979971	14.8221244248926	1.0539762585057e-49	3.05204e-48
WDR61	997.265429467397	0.774553	0.052256452680774	14.8221537073595	1.05351683892974e-49	3.05204e-48
AMY2A	2.36012949536487	-3.43862	0.232204049022185	-14.8086093456255	1.28879140979666e-49	3.72653e-48
CDC42BPB	3179.80727318298	-0.779497	0.0527710087931324	-14.7713128912884	2.24300658835692e-49	6.44783e-48
PXDNL	40.670762755074	2.45751	0.166420557142383	14.7668496840981	2.39655946501686e-49	6.87921e-48
LSM5	840.429862317803	0.87287	0.0591218842426694	14.7638995263394	2.50375685835411e-49	7.17647e-48
MTFR1	290.983833260553	0.782962	0.0530337268016292	14.7634781039721	2.51945443573772e-49	7.21098e-48
XBP1	1331.4896042078	0.905175	0.0613158180971207	14.7625010515349	2.55622660320612e-49	7.30562e-48
C1orf74	61.7643734315839	0.83503	0.0565926020767343	14.7551008203231	2.8526478613673e-49	8.14099e-48
NCOA1	2576.19954784404	-0.725904	0.0492063190946263	-14.7522511938524	2.97570657339263e-49	8.4799e-48
ADARB2	114.482046947159	-2.55177	0.172999478789553	-14.7501755616253	3.06865407386206e-49	8.73216e-48
TMEM179B	804.813771602325	0.752169	0.0510092941312592	14.745729586186	3.27758490413384e-49	9.31325e-48
SPTBN2	1379.23736620443	-1.75625	0.119107981945701	-14.7449922811784	3.31357684152013e-49	9.40198e-48
ZNF483	62.1392368761682	-1.36257	0.0924937816147921	-14.7314523332262	4.0490950486077e-49	1.1456e-47
PLOD1	3119.47166581001	0.954825	0.064825099077228	14.7292557152144	4.18287224428107e-49	1.18175e-47
MANF	893.008679606295	0.896105	0.0608411450590006	14.7286020278218	4.22352567231486e-49	1.19153e-47
RPL3	21850.8955430441	-0.897589	0.0609825327482642	-14.7187889618895	4.88327114028917e-49	1.37569e-47
PTTG1	432.282402956561	1.91189	0.129962983661597	14.711025493904	5.47710594822577e-49	1.53858e-47
IFT140	926.250973997978	-0.752789	0.0511738923235694	-14.7104042774833	5.52761940084868e-49	1.55056e-47
ASXL3	115.033114996163	-1.81269	0.12335028284547	-14.6954700820727	6.89185523391837e-49	1.9305e-47
PHF3	1425.53400204294	-0.739917	0.0503661472496008	-14.6907551188617	7.38858165398394e-49	2.06671e-47
SPDYE7P	3.23508614921091	-2.10421	0.143287489049612	-14.6852368052193	8.0153708516436e-49	2.23885e-47
DTYMK	725.731773471699	1.069	0.0727990715994443	14.6843038599547	8.12644937646355e-49	2.26667e-47
TMEM158	817.716912947661	1.88841	0.128670562934157	14.6762949330793	9.14528227798435e-49	2.54725e-47
ARID4A	587.041681340624	-0.729913	0.0497392531616276	-14.6747910817686	9.35031026284744e-49	2.60068e-47
P4HB	8838.97095035559	0.816072	0.0556374827140587	14.6676704916942	1.03849566355227e-48	2.88439e-47
C12orf41	722.385094440998	0.783624	0.0534611794641706	14.6578046111849	1.20093538512086e-48	3.33086e-47
KDM3B	2448.44207405978	-0.653908	0.0446121389358774	-14.6576162101547	1.20427172291686e-48	3.33543e-47
ADPGK	866.345176542063	0.675155	0.0460675365535692	14.6557722850448	1.23741622257553e-48	3.42242e-47
BCL7B	1306.13333460026	0.61983	0.0422993228264873	14.6534163929998	1.28108766367483e-48	3.53824e-47
ALG2	556.305973998421	0.583442	0.039817036058312	14.6530699626023	1.28763758483106e-48	3.55136e-47
UBR3	1005.02141206036	-0.621404	0.0424147704561207	-14.6506568852149	1.33419549483125e-48	3.67463e-47
HUWE1	5414.33153688259	-0.73215	0.0500153572886241	-14.6385046981692	1.59538392631394e-48	4.38786e-47
SGMS1	499.390908086959	-0.849216	0.0580226623217315	-14.6359448384114	1.65658283461672e-48	4.54983e-47
TRAPPC2P1	146.806861702265	0.776005	0.0530229263601438	14.6352786158671	1.6728899285944e-48	4.58823e-47
C7orf36	328.447210111255	0.834483	0.0570336016517807	14.6314258222492	1.77037749524635e-48	4.84887e-47
ZFAND2A	629.523283458831	0.972632	0.0665138806537721	14.6229897711519	2.00402996951797e-48	5.4812e-47
KCNE3	183.049629258605	1.39336	0.095323175515867	14.6172529810048	2.18021066573278e-48	5.95481e-47
DCN	2871.95564057768	2.04506	0.139951415464242	14.6126294756326	2.33335518803861e-48	6.36428e-47
MED13L	1888.89354337261	-0.958638	0.0656379733987682	-14.6049303619546	2.61249074984378e-48	7.11579e-47
AURKA	204.592292544274	1.59658	0.109347169206333	14.6009913751351	2.76790914360027e-48	7.51834e-47
PLCB1	1005.47737811293	-1.63546	0.112014992163874	-14.6003573218663	2.79377253842711e-48	7.57816e-47
HNRNPA1L2	1842.93747355631	-0.653369	0.0447541128635238	-14.5990839946098	2.84644112278651e-48	7.71041e-47
UCHL3	230.458649923094	0.745759	0.051094784539815	14.5955897450653	2.99610587205103e-48	8.10469e-47
EXOC3L2	22.3354836580742	2.67609	0.183350755279448	14.5954804995476	3.00090921916261e-48	8.10657e-47
POPDC2	40.3861322275609	1.00347	0.068771087175994	14.5914400265369	3.18405049170419e-48	8.5778e-47
WISP1	141.236724782434	3.1342	0.214849585798733	14.5879017965704	3.35353839525673e-48	9.02207e-47
TAGLN2	6043.38542706765	1.78685	0.122530495432633	14.5828995685474	3.60858358297516e-48	9.695e-47
TIAM1	1043.13651024661	-0.92128	0.0632150962883975	-14.5737281267673	4.12737999754601e-48	1.10737e-46
SECISBP2L	2185.45606997464	-0.858028	0.0588930300555774	-14.5692674311929	4.40590261364008e-48	1.18049e-46
CEP250	885.080577642811	-0.82702	0.05679207388482	-14.5622462481451	4.88266698073566e-48	1.30646e-46
LEPRE1	564.269127085353	1.08913	0.0747957969139874	14.5614018077411	4.94336182499312e-48	1.32091e-46
HIP1R	2583.16716269881	-1.40492	0.096510805402541	-14.5571508269516	5.26050021681466e-48	1.40375e-46
RUSC2	1330.90910942295	-0.975439	0.0670768678481201	-14.5421042864733	6.55463403782621e-48	1.74672e-46
PRDM11	29.9604687351269	-0.976078	0.0671424956442664	-14.537414738796	7.01939289949981e-48	1.86805e-46
NTNG2	401.144944821205	-1.62597	0.111864486951136	-14.5352048501441	7.24963395196294e-48	1.92672e-46
ABI1	1882.05651964424	-0.791343	0.054461141050565	-14.5304242083152	7.77375308618614e-48	2.06324e-46
MTPAP	412.027402436977	-0.769373	0.0529641212113545	-14.5263063432302	8.25533559921633e-48	2.18517e-46
NAMPT	4912.21559838423	1.92463	0.132532142904427	14.5219766395387	8.79374173506348e-48	2.32145e-46
NME1	2454.50359171763	0.990075	0.0681802002991896	14.5214475182047	8.86189078381803e-48	2.33632e-46
MINK1	3013.30593612041	-0.76513	0.0527023862579484	-14.5179301479236	9.32847241774808e-48	2.45277e-46
ARPP21	467.63328027662	-1.8909	0.130255744567331	-14.5168363037894	9.47849621434198e-48	2.48889e-46
KIAA0649	838.082933659884	-0.821004	0.0565557829510936	-14.5167067279111	9.4964262450297e-48	2.49029e-46
HSFX2	32.5106765294895	-1.07041	0.073741970679805	-14.5156531205176	9.64347775068649e-48	2.52549e-46
CNNM2	176.241325175479	-0.931165	0.0641679352880183	-14.5113677737871	1.02653049470576e-47	2.68477e-46
DGKK	7.8853350546779	-5.44989	0.375601825226682	-14.5097409124698	1.05116849654926e-47	2.74557e-46
DHX38	1561.71694590483	-0.655589	0.0451846845350702	-14.5091027385376	1.06099326221399e-47	2.76756e-46
CD276	2223.51956468949	1.08217	0.0745895165068753	14.5083699855506	1.07238684940919e-47	2.79359e-46
ARRDC3	1568.26824518288	0.952752	0.0657047714546028	14.5004942317719	1.20280718602899e-47	3.1292e-46
TIMP1	5643.61136693213	2.64647	0.182577158690993	14.4950863622542	1.30138599995901e-47	3.3812e-46
UBE2F	675.787810389106	0.623152	0.042991649481094	14.4947237945308	1.30827570688967e-47	3.39463e-46
SNX3	5130.39332389064	0.734341	0.0506789350804274	14.4900602428329	1.40019965145136e-47	3.62838e-46
ITGA5	1192.22795572433	1.6352	0.11287546593103	14.4867238474834	1.4698817795806e-47	3.80395e-46
ADHFE1	362.842127289208	-1.44433	0.0997179141078818	-14.4842023787735	1.52482410960837e-47	3.94096e-46
MPDZ	1796.15801231551	-1.00682	0.0695142296613291	-14.4836634093422	1.53683072861787e-47	3.96679e-46
GDF10	138.788947001525	-3.23847	0.223718505765697	-14.4756328626905	1.72728577093708e-47	4.45256e-46
CASKIN1	513.997566220666	-1.77632	0.12271284632485	-14.4754535145329	1.73179716696851e-47	4.45836e-46
RARS2	468.024653128562	0.73855	0.051050701591493	14.4669977158891	1.95835401165875e-47	5.03504e-46
MYH7	309.484088869089	-1.90022	0.131358988146595	-14.4658482235033	1.99134858675986e-47	5.1132e-46
EIF5AL1	1276.56339814932	0.615399	0.0425466214448165	14.4641039039052	2.0424766086326e-47	5.23766e-46
CABLES1	592.93280752954	-1.67919	0.116139308668264	-14.4584108521815	2.21861201030838e-47	5.68195e-46
EXT2	1656.59362427299	0.654167	0.045255921185956	14.4548474927596	2.33646739275022e-47	5.97602e-46
MEST	3078.03895068807	1.73218	0.119882222553142	14.4489786200557	2.54430839689447e-47	6.49919e-46
ADRBK2	540.285293466902	-1.05877	0.0732816260833278	-14.4479530029493	2.58247380113954e-47	6.58815e-46
CRTC1	1167.34013585716	-0.911181	0.0630671534549604	-14.4477861854852	2.58873508503465e-47	6.59559e-46
ACTR3	3151.15419695725	0.644247	0.0445965166762298	14.4461284451401	2.65178327815476e-47	6.74751e-46
ATP8A1	1183.71648660131	-1.60141	0.110859971646704	-14.4453388465355	2.68234879801711e-47	6.81648e-46
LGALS9C	12.5726648864432	-2.42841	0.168150104659564	-14.4419062450659	2.8193530884794e-47	7.15542e-46
SOS2	1127.19909153709	-0.635623	0.0440424469616653	-14.4320476944104	3.25278513345171e-47	8.24485e-46
RASGRF1	433.285513029352	-2.41437	0.167308955521703	-14.4305885615399	3.32233870602842e-47	8.41034e-46
KIF1A	9802.41804786864	-1.49404	0.103615908507913	-14.4190630420599	3.92636507032833e-47	9.92666e-46
DENND5A	5482.57994943704	-0.701709	0.0486703890039857	-14.4175763162435	4.01184932048064e-47	1.01168e-45
NDRG2	23755.7578565523	-1.59633	0.110750180368708	-14.4138184854468	4.23626629157548e-47	1.06555e-45
AQP9	101.625772353967	3.02864	0.210316871680428	14.4003778653743	5.14613917713538e-47	1.29112e-45
OVCA2	528.309105874998	0.851261	0.0591786217409973	14.3845991871742	6.46515624253575e-47	1.61793e-45
CYTL1	248.13898242978	1.65791	0.115263635551319	14.3836157960469	6.55770113059203e-47	1.63901e-45
ORMDL2	345.382368685025	0.833413	0.0579517024149973	14.381163977249	6.79421817355088e-47	1.69597e-45
HLF	584.642227958852	-1.57728	0.109711715379587	-14.3765689719195	7.26057841733762e-47	1.8101e-45
ZFYVE20	1725.98842674274	-0.708265	0.0492711303751391	-14.3748391166216	7.44428467172384e-47	1.85355e-45
SSR2	3677.11291518283	0.783976	0.0545478423665318	14.3722611440585	7.7266767737037e-47	1.92144e-45
FLRT1	353.792072378534	-1.72936	0.120347998294759	-14.3696431827748	8.02435988820524e-47	1.99295e-45
SSR3	2817.12256794927	0.836677	0.0582711447876964	14.3583346552728	9.44700060847453e-47	2.34333e-45
GRID1	675.492757270234	-1.21127	0.0843804176138833	-14.3548898464236	9.92831476492965e-47	2.45963e-45
MYH15	74.965254288029	-2.07013	0.144269673885681	-14.3490377705247	1.08025630094327e-46	2.67285e-45
PGR	17.5580366324465	-2.17742	0.151756539018168	-14.348128134764	1.09451693091677e-46	2.70475e-45
C5orf35	107.262823312599	1.14204	0.0796167318847133	14.3441599977115	1.15895014453596e-46	2.85904e-45
SSTR1	164.111295319283	-3.17738	0.221511383970706	-14.3441059981051	1.15985251394131e-46	2.85904e-45
BCL2L2	1231.31905577814	-0.960107	0.0669658415756343	-14.3372655805774	1.28000194339175e-46	3.15127e-45
C1orf43	4356.94590434807	0.599903	0.0418441860382334	14.3365917249364	1.29248816574296e-46	3.17804e-45
POLE2	50.4822020597317	1.99091	0.138878872858477	14.3356011723152	1.31106301185801e-46	3.2197e-45
FAM168B	4036.22111514856	-0.607894	0.0424309802667457	-14.3266450797314	1.49153848956283e-46	3.65835e-45
SRGAP3	1235.31370089005	-0.998386	0.0696894776618451	-14.3262116155921	1.50087473061214e-46	3.67668e-45
TSNARE1	223.167416587437	-0.867074	0.0605534854688281	-14.3191503366402	1.66142033140331e-46	4.06491e-45
SLC1A4	3109.00875956852	-1.20487	0.0841905439243374	-14.3112563966739	1.86120177800987e-46	4.54807e-45
ATOH8	782.47044135158	-1.61782	0.113053588962376	-14.3102308651498	1.88885248395563e-46	4.60992e-45
C7orf28A	1219.52122213123	0.795337	0.0555891512053018	14.3074163372745	1.96685712123474e-46	4.79437e-45
MRPL32	684.504421131321	0.800899	0.055983757924204	14.3059102452432	2.00990673021877e-46	4.89325e-45
C9orf21	150.606316458584	0.770775	0.0539030032089943	14.2993033609274	2.21010828629185e-46	5.37402e-45
RABL5	895.49419504737	0.87862	0.061464062497968	14.2948506307586	2.35610776822977e-46	5.72198e-45
AGXT2L1	1829.68280579306	-2.67026	0.186834576384994	-14.2920895244068	2.45142165596895e-46	5.94613e-45
CALR	14475.909277328	0.751279	0.0525846386801792	14.2870366556169	2.63589197546033e-46	6.37789e-45
HELZ	1099.22403445748	-0.647008	0.0452862928805763	-14.2870706895369	2.6346043832024e-46	6.37789e-45
NT5C2	1418.94113658058	-0.755561	0.0528853039085141	-14.2867865773046	2.64537231872838e-46	6.39298e-45
BTG3	816.616158207205	0.91755	0.0642662322288936	14.2773335532449	3.02973761745309e-46	7.3129e-45
TIPRL	945.93671732848	0.585902	0.0410509913659912	14.2725530926815	3.24478307924435e-46	7.82239e-45
GRAMD1B	176.057649814875	-1.43939	0.100867122438819	-14.2702045311091	3.35592922357e-46	8.08045e-45
TNR	1105.10548668742	-2.78061	0.194907955934676	-14.2662800821565	3.5501721570134e-46	8.53773e-45
IL17D	1249.92813160869	-1.5729	0.110266467220798	-14.2645164373314	3.64107015766932e-46	8.74566e-45
TMCC2	770.777328126721	-1.36035	0.0954074411062637	-14.2583233133975	3.97899974293093e-46	9.54573e-45
RUFY3	3553.37397532202	-0.827669	0.0580541833258274	-14.2568375924457	4.06460455415083e-46	9.73925e-45
PDZD4	2926.65478855737	-1.28879	0.0904020526033429	-14.2562226369113	4.10057131999363e-46	9.8135e-45
KTN1	3449.9422637305	-0.670588	0.0470423076345276	-14.255004843607	4.17273337249896e-46	9.9741e-45
C1orf212	702.531257008711	0.713133	0.0500395821873063	14.2513801337983	4.39508493884986e-46	1.04929e-44
SEMA4G	225.209479360777	-1.1371	0.0797905218413267	-14.2510743407899	4.41437399659464e-46	1.05262e-44
FCGR2B	207.282314890729	2.91236	0.204470961786397	14.243408333562	4.92644869670772e-46	1.1733e-44
ASB13	666.822240076172	-0.936968	0.0657894413380641	-14.241918854017	5.03259678958043e-46	1.19714e-44
AGAP4	227.31452566389	-1.27026	0.089195624824532	-14.2412983989842	5.0774823379723e-46	1.20636e-44
CCNY	1864.35187883882	-0.61	0.0428389621081245	-14.2393785158605	5.21891143858258e-46	1.23847e-44
ABCA3	3557.41446290267	-0.871504	0.0612080964625072	-14.2383730300624	5.29453822897262e-46	1.25491e-44
RAB11FIP2	432.070559626422	-0.721758	0.0507047300513714	-14.2345391784114	5.59303979601829e-46	1.32407e-44
LEMD1	9.40377182858607	3.5029	0.246198346420512	14.227960617132	6.14477351906571e-46	1.45294e-44
MTX1	484.887760503149	-0.729542	0.0512831955680595	-14.2257478415949	6.34227004798084e-46	1.49784e-44
ALG5	528.677820059873	0.83361	0.0586142991487704	14.2219510498609	6.69597169265806e-46	1.57948e-44
CTTNBP2	894.250977670349	-1.37127	0.0964358043064626	-14.2194628259007	6.93834790505382e-46	1.6347e-44
SELL	1020.28320158013	-2.5265	0.177702834225749	-14.2175686366041	7.1286949834503e-46	1.67754e-44
ERI1	463.784879267268	0.855802	0.0602197598590739	14.2113076433878	7.79561111662321e-46	1.83011e-44
GOLM1	7277.58035546804	-0.785494	0.0553053052350029	-14.2028771613	8.79269441207044e-46	2.06174e-44
CHD6	1464.03381226796	-0.852291	0.0600574512223071	-14.191260736843	1.03776107962798e-45	2.43048e-44
TMEM165	1344.08289041152	1.04028	0.0733180542717424	14.1885696383145	1.07835836728789e-45	2.52257e-44
ASL	459.071304799034	0.97457	0.0686896023497985	14.1880273896148	1.08672793635858e-45	2.53913e-44
LOC100130776	363.461502975316	2.63083	0.185441510203658	14.1868428771479	1.10523630480889e-45	2.57932e-44
ZNF35	180.685608039361	0.638995	0.0450454731135296	14.1855453079124	1.12587139760203e-45	2.62437e-44
CD63	14563.2797835401	1.11529	0.0786387806908371	14.1824805691363	1.17614433926133e-45	2.73832e-44
GPRC5B	9614.73954738416	-1.00771	0.0711032461784134	-14.172442202261	1.35697955320584e-45	3.15562e-44
KIAA2018	394.721313928905	-0.737933	0.0520844451315062	-14.1680203115027	1.4451737393286e-45	3.35675e-44
LOC648740	30.6113380081244	-1.86907	0.131925248605898	-14.1676613785102	1.45257804916658e-45	3.36998e-44
SLITRK5	279.76420890387	-1.64091	0.115847899154686	-14.1643690317835	1.52228048180355e-45	3.52522e-44
TSC1	1142.00021854382	-0.739536	0.0522232502994483	-14.1610485368164	1.59594957289448e-45	3.68958e-44
NLGN2	3826.19988266336	-0.915585	0.0647218294106901	-14.1464689258937	1.96372906402291e-45	4.53451e-44
ZC3H6	398.954491733913	-0.594501	0.0420419695567066	-14.1406581449901	2.13280333141823e-45	4.90769e-44
DYNLL2	2431.07783651423	-0.732543	0.0518043670815137	-14.1405709763341	2.13544692013483e-45	4.90804e-44
C1orf69	186.842354806647	-0.633768	0.044822539062831	-14.1394873648058	2.16858339260734e-45	4.9784e-44
PSMA5	1297.06875335734	0.671762	0.0475177356431689	14.1370810653984	2.24400815197326e-45	5.14556e-44
LRIT2	11.1721008023861	-2.45486	0.173699557684857	-14.132801983825	2.38463950455546e-45	5.46168e-44
PPM1L	171.773703750068	-1.46621	0.10374889774081	-14.1322946505581	2.40188398010553e-45	5.4948e-44
SURF4	4133.82898446325	0.61418	0.043460333657452	14.1319599491786	2.4133285022534e-45	5.51458e-44
CRTAC1	527.538067535229	-2.20221	0.155888773313963	-14.1268054268616	2.59658826263652e-45	5.92647e-44
COMMD1	307.121014534721	0.881148	0.0623940296368544	14.1223173976558	2.76738950497467e-45	6.30901e-44
SGK269	1801.21926204309	-0.853332	0.0604600823144499	-14.1139795659677	3.11492164444062e-45	7.0931e-44
USP47	2314.13572759798	-0.666458	0.0472207939433177	-14.1136512945336	3.12945914058598e-45	7.11799e-44
GBE1	775.96790118547	0.908888	0.0644013421230119	14.1128725494382	3.16421646393525e-45	7.18875e-44
SAMD8	167.499875856998	-1.26613	0.0897381491788686	-14.1091355161636	3.33642871981647e-45	7.57127e-44
FAM70B	55.0565174572348	1.35767	0.0962383399411451	14.107320663407	3.42339491069404e-45	7.7597e-44
LIPT2	16.3504627594004	0.879951	0.0623776785036918	14.1068171937586	3.44791790439209e-45	7.80631e-44
LILRA5	16.8571992402391	3.08917	0.219036413457685	14.1034410316323	3.61694141173867e-45	8.1796e-44
QPCTL	218.106312373145	0.916902	0.0650142263121274	14.1031032730258	3.63429800155687e-45	8.20943e-44
AK2	1871.25006635652	0.679951	0.0482212008935981	14.1006602909742	3.76232889418977e-45	8.48892e-44
ITSN1	1034.87647987145	-0.889965	0.063132337203829	-14.0968229634694	3.97255372881428e-45	8.94278e-44
ST13	4999.81305811408	-0.614524	0.0435964464351079	-14.0957320120921	4.03442638058097e-45	9.07171e-44
SMG1	1761.53027540852	-0.736153	0.0522452004808217	-14.0903383767221	4.35470025363173e-45	9.78072e-44
SLC16A3	843.537630166764	1.57341	0.111681072868282	14.0883769749983	4.477337283451e-45	1.00447e-43
LXN	106.783971133202	1.50727	0.107158552303867	14.0657919041615	6.16290988534591e-45	1.38105e-43
ILK	2415.61409398084	0.727794	0.0517692808913537	14.0584160233154	6.840007303506e-45	1.53104e-43
ALG14	220.27910617933	0.757428	0.0538785686169209	14.058063240241	6.87418543974084e-45	1.53695e-43
LSM10	796.706136623626	0.798584	0.0568230794057403	14.053860953261	7.29461465378702e-45	1.62726e-43
CUEDC1	761.102074429894	-0.69994	0.0498479189190153	-14.0415158053917	8.68352247429643e-45	1.93272e-43
KIAA0528	841.162529309618	-0.698347	0.0497383914822798	-14.0404029791568	8.82096152653271e-45	1.9611e-43
SMAGP	54.1555456777732	1.7586	0.125294099434038	14.0357477919384	9.41975498501484e-45	2.09186e-43
FOXL1	22.9276472929378	1.77784	0.126687122481944	14.0332961926171	9.75118733881781e-45	2.16303e-43
PPP1R9B	2497.08445238953	-0.657997	0.0469186815755484	-14.0242050448009	1.10847258833678e-44	2.45332e-43
NTRK2	27241.3148899032	-1.66498	0.118847004842226	-14.0094060215015	1.36542177640235e-44	3.01862e-43
ARHGAP21	4367.62844312325	-0.786595	0.0561722424216518	-14.003268593197	1.48863575150183e-44	3.28733e-43
DDHD2	1179.99529465329	-0.596218	0.0425901216065106	-13.99898042468	1.58122917601338e-44	3.4879e-43
EVI5L	1218.49294731974	-0.755443	0.0539701042575585	-13.9974301857937	1.61609494148816e-44	3.56083e-43
TXNDC17	776.303991178657	0.801788	0.0573008458214867	13.9925980924146	1.72975496199083e-44	3.80701e-43
ASNA1	2361.70821444649	0.695865	0.0497458904256421	13.9883988856948	1.83496591968181e-44	4.03406e-43
PLOD2	1631.78933894188	1.19984	0.0857811321823461	13.9872118623889	1.86584451778915e-44	4.09738e-43
RPN2	5510.34785229758	0.595762	0.0426081715724551	13.9823498958795	1.99780984897167e-44	4.38229e-43
NBEAL1	50.847731547366	-1.54555	0.110546633711451	-13.9809619432274	2.03715792078749e-44	4.46364e-43
PLA2G2A	632.005841089116	5.27413	0.377303334633193	13.9784908498688	2.10913069091389e-44	4.61621e-43
CALD1	4075.60990593719	1.08443	0.0775829993495494	13.9777150198578	2.1322450711434e-44	4.66163e-43
GPIHBP1	224.981678543392	-1.95441	0.139937309492995	-13.9662990656023	2.50299530529821e-44	5.46612e-43
CSDC2	1022.01819135461	-2.23664	0.160165237204487	-13.9645989554618	2.56344346368333e-44	5.59194e-43
ATP1B3	2038.84905780785	0.647553	0.0463743885835126	13.9635916916017	2.59994007599973e-44	5.66528e-43
MTMR10	1765.53068915224	-0.724605	0.0519002374112271	-13.9615025864701	2.6772917726533e-44	5.82097e-43
ZFYVE16	1188.19108825967	-0.77063	0.0551971825317741	-13.9613942920924	2.68136334614572e-44	5.8234e-43
SMYD2	549.038453768299	1.37468	0.0984731337712805	13.9599281179538	2.73709765120384e-44	5.93791e-43
PHF2	1657.98316288895	-0.676562	0.0484670753891862	-13.9592179926258	2.76450477750127e-44	5.99077e-43
HPS4	1021.68491154809	-0.621541	0.0445358680594526	-13.9559741009017	2.8932155446498e-44	6.26281e-43
FAM20A	187.38084387498	2.27427	0.162971203294138	13.9550430315288	2.93124756998205e-44	6.33818e-43
GINS1	353.185485726963	1.38256	0.0991118946344037	13.9494986582678	3.16824599666402e-44	6.84313e-43
PTGR2	431.000232439878	-0.823664	0.0590581747382961	-13.9466549953716	3.29710094514585e-44	7.11366e-43
PAIP2B	509.689030491626	-1.76599	0.126668704473388	-13.9417720750779	3.5306384793292e-44	7.6092e-43
S100A11	2146.68626067208	1.59422	0.114369741680957	13.9392070708169	3.6598358334517e-44	7.87904e-43
SEPT8	4687.21537631905	-0.694878	0.0498527221089286	-13.938619686158	3.69007769334411e-44	7.93548e-43
MIR155HG	24.480723766411	2.17541	0.156093642473092	13.9365789302507	3.79709272617982e-44	8.15672e-43
CDC42	4826.618549761	0.58846	0.0422471911295144	13.9289814852885	4.22335166784604e-44	9.06251e-43
MRVI1	1198.84207579248	-1.44921	0.104068361809551	-13.9255558860595	4.43080719320632e-44	9.49734e-43
RNASEH2A	607.531360643274	1.0608	0.0761801240784751	13.9249285178168	4.46988478136248e-44	9.5707e-43
GLT25D1	1720.07607203618	0.915949	0.0657826885522525	13.923859640884	4.53725446941155e-44	9.70441e-43
PFKFB4	451.704311859507	0.953088	0.0684729482761643	13.9191895224301	4.8436537363114e-44	1.03485e-42
TUBA1A	54132.7489997041	1.03441	0.0743202720717569	13.9183140233868	4.90334419678175e-44	1.04647e-42
ZNF438	272.095750203211	-0.73167	0.0525847716730341	-13.9141125434503	5.20013727654008e-44	1.10861e-42
WDR41	800.341120208	0.599085	0.0430703473767921	13.9094639705092	5.54937753870367e-44	1.18179e-42
MED31	248.388002834641	0.912858	0.0656322455110502	13.9086750389244	5.61092292023112e-44	1.19361e-42
ZC3H13	1423.56169733561	-0.834664	0.060022167712371	-13.905926578159	5.83068520629736e-44	1.23902e-42
PDIA4	3514.45031928795	1.02944	0.0740568470348921	13.90062480151	6.2790837661037e-44	1.33287e-42
C1orf53	50.3885247542576	1.3418	0.096565659487718	13.8952023042353	6.7731867877405e-44	1.43385e-42
ZNF592	1549.67356738764	-0.623016	0.0448712078573019	-13.8845349542088	7.86089148921667e-44	1.66149e-42
SYNPO2	578.292400101751	-1.57918	0.113791453139253	-13.8778875963809	8.62484876042363e-44	1.82101e-42
ACN9	340.94999871003	1.22145	0.0880274607205526	13.8758205659908	8.87713396974465e-44	1.87227e-42
C10orf75	262.336225909126	-1.19771	0.0863218851153935	-13.8748909275843	8.99297878631023e-44	1.89467e-42
TDG	294.063105558953	0.671131	0.0484064367246099	13.864489268873	1.03963447199215e-43	2.18567e-42
ADD3	4687.94934164805	-1.11583	0.0805033283456489	-13.8606136188392	1.09732162065044e-43	2.30449e-42
BMPR2	2259.23001821942	-0.62614	0.045180444583423	-13.8586562725941	1.12765495754183e-43	2.36568e-42
TMEM170B	914.916353110131	-0.801617	0.0578773437168435	-13.8502661220082	1.26741662295805e-43	2.65323e-42
GARNL3	254.24327871373	-1.04761	0.0756411789248022	-13.8497852339703	1.27593003697168e-43	2.66822e-42
PARD3B	106.135145782122	-1.71204	0.123644753803911	-13.846454392695	1.336480042254e-43	2.79188e-42
SLC39A1	2602.8079390472	0.636034	0.0459551605369376	13.8403084523417	1.45580551450149e-43	3.03793e-42
DGCR6	1069.35661359126	-1.42557	0.103024670266469	-13.8371432962465	1.52133384856984e-43	3.17132e-42
DOPEY1	767.783184450709	-0.811289	0.0586396790548901	-13.8351581781856	1.56392062073755e-43	3.25665e-42
POLR2G	1800.6691076167	0.745538	0.053890289348475	13.8343594414247	1.5813886654708e-43	3.28956e-42
C1orf198	3440.96399815897	-1.05155	0.0760140481669573	-13.833679401654	1.59641374300233e-43	3.31731e-42
CLTCL1	187.639318170548	-0.989011	0.0715867025288558	-13.8155622857116	2.05344545040838e-43	4.26252e-42
ADIPOR2	2686.69491348864	-0.838097	0.0606680558457345	-13.8144658614446	2.08494976311318e-43	4.32337e-42
JARID2	605.701710269975	-0.81275	0.0588446839254338	-13.8117864017487	2.16397860148819e-43	4.48253e-42
CUL9	859.660866218526	-0.669515	0.0485086351001789	-13.801966259177	2.47994887016846e-43	5.13165e-42
MRPS15	720.382964707015	0.853183	0.061818006076566	13.80152129362	2.49530546749424e-43	5.15801e-42
UBE2T	263.985658015032	1.69677	0.122972025822943	13.7980417301002	2.61869979988507e-43	5.40741e-42
SRXN1	889.316684140472	0.906829	0.0657247995704621	13.7973582081358	2.64364328388015e-43	5.45321e-42
OTUD1	420.512429881143	-1.22001	0.0884279457353715	-13.7967034183436	2.66775988328533e-43	5.4972e-42
CYP2E1	59.0457488757882	-1.96737	0.142650224704754	-13.7915866937265	2.86390792971946e-43	5.89523e-42
CLIP3	6979.41991155981	-0.848144	0.061498242201308	-13.7913616122904	2.87285830430832e-43	5.90748e-42
PCNT	883.798094088803	-0.748716	0.0542972975867429	-13.7891994203482	2.96026821154086e-43	6.08088e-42
FBXO22	365.160718109339	0.805073	0.0583996855168714	13.7855771800865	3.11267080185366e-43	6.38729e-42
PHF21A	1339.26014233122	-0.60332	0.0437719843583875	-13.7832351203715	3.21534030780806e-43	6.59111e-42
TAGLN	2703.12465482778	1.83338	0.133021726979379	13.7825832237651	3.24451229950912e-43	6.64401e-42
ZNF721	586.951266207326	-0.619799	0.0449711380639628	-13.7821560569842	3.2637704019141e-43	6.67651e-42
ZRSR2	207.778097862623	-0.767551	0.055697785440193	-13.7806349765719	3.33327379301612e-43	6.81162e-42
POLE3	1750.85118748805	0.649303	0.0471264394854829	13.7778894372711	3.46247500917681e-43	7.06832e-42
SPDYE8P	24.0711762894412	0.913718	0.0663483145741013	13.7715328615348	3.78104480529056e-43	7.71067e-42
F5	392.991122305024	-3.42274	0.24855869197196	-13.7703460783652	3.84367441732349e-43	7.8303e-42
GLRX2	102.895618205949	0.770799	0.0560401659814437	13.7544084063573	4.79184342722962e-43	9.75182e-42
LRRC32	319.852713412193	1.46686	0.106707363710487	13.7465214330891	5.34377537208621e-43	1.08638e-41
TECPR2	1315.13071398176	-0.761916	0.0554429240263963	-13.7423426277987	5.6613852515327e-43	1.14977e-41
SHC1	1673.62584501576	1.22778	0.0893546097847166	13.7405468798579	5.80357501629414e-43	1.17743e-41
ECSCR	87.4337138412505	1.64477	0.119702897520424	13.7404469798059	5.8115887334054e-43	1.17785e-41
UNC80	605.383585433823	-1.43345	0.104346197776395	-13.7374119874145	6.06036574169916e-43	1.22701e-41
MIB1	1592.64001455063	-0.791734	0.0576389452509285	-13.7360940147629	6.17167188032193e-43	1.24826e-41
DPY30	636.627946137562	0.658545	0.0479430471732648	13.7359888400773	6.18064127370218e-43	1.24879e-41
PPP2R5A	1644.7549915493	-1.01982	0.0742523757530665	-13.7345219731093	6.30709706107341e-43	1.27304e-41
PRMT6	534.673196976918	0.632644	0.0460626593003908	13.7344172309451	6.31622451310935e-43	1.27358e-41
FAM110B	1234.98390645878	-1.25408	0.0913380624102294	-13.7300437949562	6.70929488809711e-43	1.35007e-41
CTAGE1	3.5974083212361	1.42014	0.103466139395879	13.7256094345331	7.13268450543432e-43	1.43381e-41
MED18	281.229738275148	0.730646	0.0532626317987942	13.7178032752809	7.94358353257776e-43	1.59519e-41
MYNN	426.201815900867	0.639955	0.0466532718180134	13.717267688471	8.00246861227206e-43	1.60538e-41
C6orf57	112.462273218796	0.887119	0.0646734583963761	13.7168929713001	8.04392486020423e-43	1.61205e-41
TSHZ1	1053.6908263212	-0.898174	0.0654859355681532	-13.715523014258	8.1973144176276e-43	1.64113e-41
CENPW	69.1342411834334	1.4362	0.104716722686453	13.7151273086847	8.24215940770114e-43	1.64843e-41
NR1D2	1099.99086613732	-0.867313	0.063251592371004	-13.7121080379608	8.59246264545374e-43	1.71501e-41
RPP40	124.691283041467	0.784197	0.0571946405059904	13.7110191413201	8.72240017278526e-43	1.73919e-41
GAB2	2123.31007186701	-0.801625	0.0584768313663961	-13.7084259838376	9.03976433621737e-43	1.80065e-41
DMXL1	732.942005210118	-0.665944	0.0485808696821403	-13.7079430370731	9.10012630957068e-43	1.81084e-41
FAM133A	86.7789326103061	-2.05782	0.150151681740821	-13.7049161374314	9.48768676170323e-43	1.88606e-41
ZNF91	401.769355532544	-0.753315	0.0549884947220684	-13.6995001900316	1.02225536818747e-42	2.0301e-41
C14orf132	3581.01266098336	-1.28782	0.0940115810308352	-13.6985454814038	1.0357842558836e-42	2.0549e-41
FBXO18	1114.73746994928	-0.648251	0.0473239132338331	-13.6981675079249	1.04118948634744e-42	2.06354e-41
KCNE4	419.598123820823	1.92663	0.140759139468567	13.6874509915473	1.20668570557865e-42	2.38914e-41
ICAM3	168.346529592647	0.852793	0.0623163756071393	13.6848937094702	1.24989784763811e-42	2.47222e-41
BCL2L12	118.524971094397	1.12376	0.0821242755637616	13.6836777755606	1.27098087481229e-42	2.5114e-41
DNAJB9	1137.05816367129	0.856622	0.0626033086341438	13.6833266725385	1.27713419228964e-42	2.52103e-41
C9orf129	59.4140217809697	-1.05083	0.0768699520098865	-13.6701949242006	1.52984830742033e-42	3.01686e-41
CDHR1	449.039048953582	-1.79117	0.131089127398618	-13.663793187502	1.67050270939751e-42	3.29094e-41
TERF2IP	3518.28698527348	-0.580097	0.0424751342136862	-13.6573296406013	1.82556311876773e-42	3.58924e-41
DKFZp434J0226	18.931517652324	-3.51536	0.257447989302044	-13.6546237386828	1.8946541376415e-42	3.72137e-41
PLEC	8828.46485783824	-1.0715	0.0784920973917265	-13.6510071779162	1.99107495542781e-42	3.90687e-41
LOXL1	258.812652022528	2.56545	0.187938487042872	13.6504767191632	2.00562208622626e-42	3.9315e-41
PLXNB1	4832.64720671408	-0.997165	0.0730609922147924	-13.6483943807679	2.0637567499179e-42	4.04144e-41
ULBP2	32.0503482515861	1.87222	0.13717801888376	13.6481355126331	2.07109997818247e-42	4.05179e-41
GBAS	4806.54971001856	1.75536	0.128644956575061	13.6449677071761	2.16309308448886e-42	4.22757e-41
ADAM8	153.617208416391	1.88889	0.138473288172317	13.6408381157744	2.28914484713065e-42	4.4695e-41
MRPL33	587.368305429217	0.770262	0.056478799113523	13.6380664188437	2.37781935476161e-42	4.63804e-41
WWOX	523.636456169847	-0.84246	0.0617894554358404	-13.6343730052214	2.50131362819363e-42	4.86929e-41
PRPS2	374.361969554143	1.27354	0.0934151582013828	13.6330776277305	2.54612063943342e-42	4.95163e-41
ATP6V0B	2951.65739459747	0.829525	0.0608688517010649	13.6280777379348	2.72668132272e-42	5.29755e-41
LPHN1	2842.50481464212	-0.843101	0.0619170038581184	-13.6166349747366	3.18927562846514e-42	6.18412e-41
DEGS2	41.5565742772742	-1.65055	0.121332691778164	-13.6034774798118	3.81837386433276e-42	7.38943e-41
SGSM1	243.757231696074	-1.88815	0.138803425281528	-13.6030343248372	3.84158571021285e-42	7.42707e-41
HMGN2	6112.51874470724	0.835152	0.0613962130097816	13.6026646871283	3.8610541433734e-42	7.45739e-41
C10orf2	348.839905946357	-0.829146	0.0609622741148116	-13.6009638024477	3.95191032867094e-42	7.62541e-41
TOMM5	938.364888545152	0.74842	0.0550413991488887	13.597407200369	4.14882332008231e-42	7.99754e-41
LZTS2	1359.33070277729	-0.767789	0.0564780838175029	-13.5944608903777	4.31931581948668e-42	8.31806e-41
PSMG3	686.087181565094	0.888641	0.0653774797037593	13.5924669102172	4.43863657801322e-42	8.5395e-41
CCNA2	307.831337404209	1.67975	0.12366141153767	13.5834419997132	5.0210270406383e-42	9.65055e-41
PHACTR3	998.889590456496	-1.77821	0.130948989947968	-13.5793845127081	5.30705203316028e-42	1.01904e-40
TEAD3	194.277200543122	1.70924	0.125886479429718	13.5776678150262	5.43289328065391e-42	1.04219e-40
MIF	4531.10951528613	1.13434	0.0835898001828592	13.5703246857653	6.00554185362466e-42	1.15092e-40
RSRC1	266.631890171594	0.634217	0.0467382113116475	13.569570594046	6.06764558930197e-42	1.16169e-40
GRLF1	3314.61638879296	-0.857351	0.0631850230032888	-13.5689020204153	6.12324042076259e-42	1.17006e-40
STK17A	1306.83613101587	1.1071	0.0815978623906114	13.5677065084903	6.22391845380609e-42	1.18815e-40
DYNLT1	1525.95075447243	0.910326	0.0671007338681403	13.5665511017491	6.3227832446343e-42	1.20585e-40
FUT9	865.285276670386	-1.82124	0.134257889390656	-13.5652462757305	6.43631262188148e-42	1.22632e-40
ZNF397	316.446765151148	-0.685262	0.0505238276227074	-13.563135839184	6.62424304610014e-42	1.26091e-40
TEAD2	405.94611201938	1.4888	0.109810453059117	13.5579369623773	7.11080165964256e-42	1.35092e-40
IFT52	840.296825346779	0.628025	0.0463426604380223	13.5517577511638	7.73553221807208e-42	1.46819e-40
SMAD7	334.453511185814	-0.960593	0.0708933585209054	-13.5498329194575	7.94106841809573e-42	1.50575e-40
LOC148145	45.4826522985865	-3.31679	0.244792708937968	-13.5493924833966	7.98885724447149e-42	1.51336e-40
GCLC	1307.8226691598	-0.90314	0.0666726616692738	-13.5458774610168	8.38064323396737e-42	1.58605e-40
TRAK1	1781.85022510079	-0.658187	0.0485928041031192	-13.5449524901286	8.48687918928001e-42	1.60461e-40
CAMK2G	2050.85676434015	-1.09967	0.0812517148118851	-13.5340630738205	9.84293961954855e-42	1.85744e-40
FADD	524.042647419409	0.623557	0.0460730454706858	13.5341000674178	9.83798614056529e-42	1.85744e-40
RUFY2	530.17834628779	-0.617902	0.0456695586901134	-13.5298519401151	1.04233364317694e-41	1.96509e-40
CDK2	560.013953741947	1.06377	0.0786430570749553	13.5265785770407	1.08978915112837e-41	2.05259e-40
CXCL3	47.2876977439589	2.51389	0.18587105147751	13.5249301130952	1.11449516453461e-41	2.09712e-40
ADSL	858.871854014382	0.757379	0.0560253941294702	13.518487189388	1.21651751945976e-41	2.28691e-40
BAK1	295.039586942536	0.606435	0.0448607939748337	13.5181512123601	1.22208536852805e-41	2.29519e-40
IFI30	2050.11115022567	1.79664	0.132949909691016	13.5136852370638	1.2985488554644e-41	2.43416e-40
ZNF707	216.663598036012	-0.684411	0.0506478758353498	-13.5131212187457	1.30853798962521e-41	2.45056e-40
TCEB1	714.759258990865	0.603437	0.0446575058816554	13.5125596146091	1.31856030077597e-41	2.46698e-40
BET1	479.211152422238	0.900913	0.0666823034848531	13.510521238877	1.35558257811714e-41	2.53385e-40
C17orf91	123.508451668865	1.23387	0.0913584708214771	13.5058145107676	1.44506643974001e-41	2.69855e-40
TNFAIP6	188.748666845274	2.4231	0.17942498822599	13.5048106457274	1.46489907346304e-41	2.733e-40
SMN1	11.3466492271589	1.89537	0.140365783258669	13.5031093286577	1.49913085038346e-41	2.79422e-40
DPYD	664.794314780599	1.83261	0.135728372326337	13.5020553786706	1.52073500721142e-41	2.83181e-40
ATG10	89.9599143617704	0.704959	0.0522291904736341	13.4974140336236	1.61961884175103e-41	3.01026e-40
MRPS23	853.489419432423	0.704779	0.0522662237340641	13.4844148652033	1.93192081537859e-41	3.58733e-40
MMP13	10.8617608087723	6.51153	0.48291185341686	13.4838804145227	1.94597000899996e-41	3.61002e-40
ACO2	4945.18341107778	-0.751173	0.0557328831022607	-13.4780975986743	2.10463701722576e-41	3.9007e-40
S100A8	249.886409879236	2.58812	0.192130581599187	13.4706318017866	2.32864840627313e-41	4.31183e-40
RPL4	17887.6492064781	-0.828666	0.0615169363400112	-13.470538778467	2.33158414297528e-41	4.31321e-40
DDX39	1288.97480403523	0.804351	0.0597139711335076	13.4700673916781	2.34651739214363e-41	4.33677e-40
ZYX	5226.44790856631	1.14728	0.0851760114522325	13.469528660711	2.36370057634473e-41	4.36444e-40
AMOT	1844.03245912715	-1.3483	0.100104789926484	-13.468847684382	2.38559995358315e-41	4.40075e-40
MMP1	20.5617942996709	4.34977	0.323114583329317	13.4620120061513	2.61692034780954e-41	4.82296e-40
SPINK8	15.2980951686408	2.4593	0.18272850905195	13.4587383042915	2.73547210923951e-41	5.03204e-40
FAM53B	1107.62694330454	-0.86722	0.0644429514157463	-13.4571801057933	2.79376108873184e-41	5.1297e-40
WASF3	2529.10580058508	-1.21518	0.0902993704979499	-13.4571842769862	2.79360341573579e-41	5.1297e-40
CYP2A6	1.71551902510371	-3.27455	0.243360735895651	-13.4555368523914	2.85657044326409e-41	5.24015e-40
C9orf30	332.20934112094	0.702858	0.0522521753829293	13.4512596376515	3.02671944386807e-41	5.54711e-40
JAKMIP3	102.461491510001	-1.65502	0.123063567767088	-13.4485352826442	3.14031154318131e-41	5.74995e-40
RAPGEF4	1053.73266870924	-1.6366	0.121713786617139	-13.446303799667	3.23650438930572e-41	5.92058e-40
LIX1L	1178.53188177526	-0.618043	0.0459672801312318	-13.44528269251	3.28149324236576e-41	5.99732e-40
DMBX1	7.82365442339138	3.96491	0.294915661812625	13.4442147974451	3.32920897059467e-41	6.07889e-40
LCOR	40.6792916705578	-1.49995	0.111696315414446	-13.4288210464537	4.09885002256027e-41	7.47727e-40
CCNYL1	434.243309401123	0.666433	0.0496351365471086	13.4266450376173	4.2210572147456e-41	7.69309e-40
DSN1	335.864812225596	0.986698	0.0734955728439625	13.4252760249351	4.29979263924665e-41	7.82935e-40
BACE2	353.129790898025	1.44508	0.107651852316927	13.4236482096211	4.39531539463408e-41	7.99591e-40
ZNF770	1000.99642587343	-0.74264	0.0553247744863157	-13.423282685708	4.41705340959233e-41	8.02805e-40
PRKX	905.38232298789	-1.18656	0.0884345676361148	-13.4173883651931	4.78272775791444e-41	8.67667e-40
HTT	2187.31949852804	-0.629669	0.0469332235302715	-13.4162749777894	4.85510759295415e-41	8.79988e-40
MTMR7	198.114244676401	-1.46836	0.109483724967098	-13.4117018524247	5.16400451520049e-41	9.35116e-40
SNAPIN	1085.60385640199	0.681355	0.050804975965023	13.4111887871747	5.19985705429253e-41	9.40745e-40
ALG1	460.11916101646	0.676072	0.0504332273059804	13.4052882739928	5.63040809515286e-41	1.01677e-39
DNAJB2	3671.10211065898	-0.723659	0.05398983851393	-13.4036086388122	5.75932600819892e-41	1.0391e-39
FRAT1	178.415597966996	-1.20394	0.0898961372889923	-13.3925161959485	6.6876104893767e-41	1.20438e-39
DOCK1	1469.79418153407	-0.807456	0.0603092307628025	-13.3885918249994	7.05048228546236e-41	1.26857e-39
FAM149B1	492.681349796996	-0.622324	0.0464844393026714	-13.387789932348	7.12700550382357e-41	1.28117e-39
CYB561D2	365.695422868769	0.669138	0.0499824779286688	13.3874486793523	7.15982070412183e-41	1.2859e-39
BDP1	606.618735986553	-0.691775	0.0517099384923807	-13.3779938587636	8.13125261334999e-41	1.45904e-39
ATG4A	235.757434973762	0.586544	0.0438464106176152	13.3772467017239	8.21338722686668e-41	1.47244e-39
KIAA1462	757.865543625108	-1.18681	0.0887707352329479	-13.3694300303149	9.12372842657151e-41	1.63415e-39
POLR3H	1930.70605431971	-0.756491	0.0565968833746468	-13.3663027945935	9.51542720280405e-41	1.70276e-39
DAAM2	6466.06705273001	-1.93763	0.144970805369858	-13.3656564915926	9.59844108080332e-41	1.71606e-39
CYB5R4	278.430366737215	0.809788	0.0605896420288966	13.3651251133807	9.66723275000904e-41	1.72679e-39
ANGPT2	634.761589811779	1.85217	0.138599575339078	13.3634435843972	9.88816891068707e-41	1.76466e-39
SYDE1	665.321706737035	0.814699	0.06096549735015	13.3632786699878	9.91010555912857e-41	1.76697e-39
MAP4K4	7474.11506403445	-0.680781	0.0509477105476422	-13.3623443431349	1.00353051619624e-40	1.78768e-39
C4orf12	129.704781625744	-1.2052	0.0902234905220103	-13.357954390704	1.06449416260242e-40	1.89457e-39
PL-5283	1926.2647561	0.656675	0.0491960114348823	13.3481372125069	1.2144801543302e-40	2.15762e-39
APBB1	3135.03157488949	-0.768681	0.0575904035366818	-13.347386590086	1.22677758211427e-40	2.1775e-39
H2AFZ	2986.62596280201	0.766047	0.057394332985201	13.3470810488821	1.23181864577985e-40	2.18448e-39
IGFBP3	4528.93459621983	2.31635	0.173610090003314	13.3422330952624	1.3146168412573e-40	2.32922e-39
LDHD	246.19466251077	-1.30652	0.0979263610982871	-13.3418894893583	1.32069106114953e-40	2.33788e-39
CTBP2	1022.59661800179	-0.608891	0.0456378895090254	-13.3417955113066	1.32235724811947e-40	2.33873e-39
LOC349196	30.5263997962259	1.75718	0.131760414893018	13.3362070068162	1.42529011716098e-40	2.51852e-39
CD151	3427.8600631375	1.16632	0.0874588845880562	13.3355932314232	1.43706976075209e-40	2.53706e-39
TSPAN17	792.363647354922	0.639412	0.0479528589285745	13.334170481004	1.46474898581123e-40	2.58362e-39
EIF3I	3529.22259274661	0.589328	0.0442007673085198	13.3329894669353	1.48812752866733e-40	2.62251e-39
KCNJ10	4771.88574384606	-1.23911	0.0929446275440369	-13.3316801316838	1.51448018182773e-40	2.66487e-39
PCDH15	829.824304696188	-2.73593	0.205220274937339	-13.3316609918222	1.51486882652085e-40	2.66487e-39
SRA1	909.297091221653	0.672008	0.0504114162955594	13.3304720895053	1.53920553087022e-40	2.70527e-39
H3F3A	3847.44142586486	0.759291	0.0569739717311643	13.3269717063211	1.61313867894354e-40	2.83269e-39
MVD	723.947645675201	-0.890139	0.0668039799426	-13.3246442953785	1.66424096581844e-40	2.91982e-39
SGSM2	2565.68507197059	-0.787054	0.0590768617890613	-13.3225396365001	1.71183687946326e-40	3.00066e-39
RPS2P32	32.8865838152021	1.87177	0.140502883124451	13.3219038800371	1.72647866321699e-40	3.02364e-39
STAG3L4	290.224639627903	1.04666	0.0785931213443664	13.317421878925	1.83329597781548e-40	3.20502e-39
MAPK8IP3	2751.05294430804	-0.959263	0.0720414826067194	-13.3154271482165	1.88292470014383e-40	3.28886e-39
PDCD11	714.240294550286	-0.775733	0.0582943827890812	-13.3071585806448	2.10329661848113e-40	3.66729e-39
UPP1	602.524845608231	1.52548	0.114676260850465	13.3024542265198	2.23993343654931e-40	3.90207e-39
TFB2M	205.829078974467	0.62405	0.0469149845105054	13.3017203367184	2.26203076895732e-40	3.93709e-39
ZBTB44	867.75529293287	-0.608467	0.0457562124418394	-13.2980182298631	2.37684935952944e-40	4.12964e-39
PTPRT	569.207332521636	-2.29122	0.172302853129883	-13.2976224045175	2.38946350334473e-40	4.14791e-39
TTBK2	161.143388526156	-1.19281	0.0897189900220253	-13.2949363394007	2.47683944569041e-40	4.29203e-39
PDE4DIP	4864.37602954215	-1.0855	0.081715836001202	-13.2838197677438	2.87353488422755e-40	4.97508e-39
PABPC3	229.132696447664	0.97031	0.0730705244468073	13.2790851713665	3.06111064389793e-40	5.29054e-39
ELFN2	1078.44262044172	-2.25485	0.169862215008675	-13.2745651894581	3.2515294943564e-40	5.61473e-39
RACGAP1	740.795749631583	1.1038	0.0831528146671086	13.27433029181	3.26174111102075e-40	5.62743e-39
PRX	179.790482809791	-1.18497	0.089291845058529	-13.2708060221072	3.41883497909218e-40	5.89331e-39
SART1	1621.77292531775	-0.688398	0.0518822391674115	-13.2684777976307	3.52671931104828e-40	6.07397e-39
DVL1	1567.49515660647	-0.66892	0.0504164794758949	-13.2678931603773	3.55433760020027e-40	6.11619e-39
PHF5A	547.92675249695	0.707834	0.053351054277654	13.2674723741392	3.57434856433129e-40	6.14526e-39
PLVAP	609.020103288573	1.52153	0.114831247884144	13.2501363237807	4.50384412908179e-40	7.72984e-39
TOP2B	4289.80431190864	-0.639823	0.0482897995651691	-13.2496570803986	4.53269632264909e-40	7.77259e-39
PPIAL4G	17.9012627665427	1.23494	0.0932967290125374	13.2366525848745	5.38980179690834e-40	9.23431e-39
HEATR2	875.394079726757	0.666422	0.0503548653615628	13.2345157982571	5.54529533538841e-40	9.49247e-39
AKAP1	1214.32387935604	-0.669635	0.0506229404992458	-13.2278972500162	6.05579657042799e-40	1.03394e-38
BRD3	1352.81285003811	-0.831172	0.0628359583360147	-13.2276432249635	6.07629478366538e-40	1.03654e-38
PPM1K	738.074539729201	-1.03904	0.0785672466569295	-13.2248531818007	6.3060248692642e-40	1.0748e-38
DUSP26	570.241224602028	-1.67002	0.12628615943416	-13.224118437946	6.36794655622871e-40	1.08442e-38
PPP1CA	2418.13681494579	0.643901	0.0486935813533344	13.2235368781805	6.41738677895271e-40	1.0919e-38
MTMR3	1833.19859936534	-0.614309	0.0464684857558772	-13.2198950669446	6.73578502271126e-40	1.14508e-38
PSRC1	1691.61791465433	1.31355	0.0993866025177487	13.2165616283939	7.04096962319203e-40	1.1949e-38
SIVA1	906.209336667354	0.861827	0.0652320871585673	13.2117001360785	7.51086087680015e-40	1.27355e-38
PHF10	1657.55905919943	-0.591024	0.0447484512445701	-13.2076972204252	7.92107596229498e-40	1.34196e-38
TRIP13	176.566062102296	1.47036	0.111361655137938	13.2034914989924	8.37608842027659e-40	1.41782e-38
HEATR5A	1234.8041574392	-0.832105	0.0630522712615308	-13.1970674734289	9.1217455980391e-40	1.54272e-38
PDIA5	189.578080876411	1.26851	0.0961261083192776	13.1963375626816	9.21053830516289e-40	1.55507e-38
STBD1	265.128316798736	1.07656	0.081580047405072	13.196348911483	9.20915118216888e-40	1.55507e-38
FASN	4065.40777634584	-0.917867	0.0695661360159112	-13.1941586003738	9.48075099936186e-40	1.59932e-38
PDRG1	691.567424672642	0.695583	0.0527288108871817	13.1917041368275	9.79457897273484e-40	1.64944e-38
DRAM1	328.373857970315	1.15345	0.0874476106385123	13.1902169877358	9.98972906321048e-40	1.68087e-38
TCEAL2	1391.01288236532	-1.43218	0.108625000411261	-13.1846671418652	1.07527536938639e-39	1.8031e-38
ZNF275	1516.99135228494	-0.846374	0.0642401302324388	-13.1751579072026	1.21971970760391e-39	2.04357e-38
C16orf5	2666.4293771326	-0.770686	0.058513304631056	-13.1711292344052	1.2865880180772e-39	2.15378e-38
ATP6V1G2	1467.6522190855	-1.45485	0.110468336004308	-13.169811605809	1.30923955736177e-39	2.18984e-38
C20orf20	351.820594946542	0.64479	0.0490038765775922	13.1579305022787	1.5322545586186e-39	2.55851e-38
TBC1D12	539.072386983364	-0.740032	0.0562643993644899	-13.1527545832252	1.64085956899788e-39	2.73754e-38
MAD2L1	367.252056962652	1.33176	0.101262310950648	13.1516159887901	1.66575893185706e-39	2.77673e-38
CLN8	876.000678165173	-0.69926	0.0531722676396842	-13.1508393393403	1.68295826944535e-39	2.80304e-38
TWISTNB	468.125490378238	0.582771	0.0443164357055215	13.1502315533376	1.69654109583932e-39	2.82327e-38
SMAD9	238.79712711377	-1.46291	0.111297652619349	-13.1441087101811	1.83960351241249e-39	3.05877e-38
AMY2B	219.4768857779	-1.46551	0.11152974725225	-13.1401065804997	1.93953370108564e-39	3.22221e-38
SALL2	2600.11670112485	-0.955874	0.0727460094850094	-13.1398856595647	1.94520448976199e-39	3.22891e-38
PDZD8	451.901133846892	-1.01867	0.077528165412765	-13.1394026038751	1.95766147658698e-39	3.24685e-38
REXO2	562.359726581336	0.833331	0.063427998997682	13.1382229363633	1.98841699229502e-39	3.29509e-38
LRRC8E	16.703656050132	2.76752	0.210686486171797	13.1357414444292	2.05468986987241e-39	3.40206e-38
NMT2	373.946465028636	-0.719606	0.0547834388771204	-13.1354670297805	2.06215216836381e-39	3.41155e-38
BRI3	1444.10641656741	0.784846	0.0597630361561846	13.1326328803298	2.14081670478345e-39	3.53872e-38
FAM69A	779.773231981791	-0.924824	0.0704249831537863	-13.1320419271208	2.1575913492604e-39	3.56346e-38
TPI1	8664.09070517452	0.763847	0.0581671536731882	13.1319295156089	2.16079699626615e-39	3.56577e-38
LOC100129550	222.980277044211	-0.654674	0.049859282388767	-13.1304420987533	2.20366234111413e-39	3.63346e-38
TAOK3	1762.84313583597	-0.603557	0.0459831568873617	-13.1256038147192	2.3490292768365e-39	3.86991e-38
MCM6	940.683513437597	0.894778	0.0681765116190195	13.1244355841742	2.38553453126214e-39	3.92677e-38
RFTN2	1511.1595044802	-1.01594	0.0774156518403809	-13.1231745915982	2.42557168218787e-39	3.98935e-38
KIF7	365.915676679796	-0.763287	0.0581671791286012	-13.1222972704314	2.4538204959035e-39	4.03245e-38
PLCL1	375.664858409105	-1.36581	0.104116493530214	-13.118114145238	2.59307618915157e-39	4.25774e-38
SAPS2	1415.67497613339	-0.621611	0.0473924862854461	-13.1162325729415	2.65824896260566e-39	4.36112e-38
KIF4B	8.19252084194449	1.70809	0.13022899325055	13.1160650664146	2.66412930259609e-39	4.36713e-38
PDCD2	622.671620216676	0.684878	0.0522307339065433	13.1125464395181	2.79068450728394e-39	4.57079e-38
OTUD7A	60.3991840839084	-1.43959	0.109873930650142	-13.1021546882813	3.20041049782121e-39	5.23752e-38
SNRPB	2167.29323448305	0.842569	0.0643092163761939	13.1018450443128	3.21349587783129e-39	5.25457e-38
SPP1	46294.5985434878	1.98713	0.151734648956821	13.0960552152887	3.46820470396646e-39	5.65231e-38
IGFBP7	10800.3991801676	1.32574	0.101241977152247	13.0947234227019	3.52957678406235e-39	5.74758e-38
SOX8	8981.11901975281	-1.78771	0.136539491409632	-13.093005581816	3.61033604431851e-39	5.87424e-38
CAMK1D	188.008699117653	-1.00926	0.0771500312037865	-13.0818464067216	4.18157813523834e-39	6.79808e-38
CA12	1296.68103756319	2.13187	0.162995243879211	13.0793125784658	4.32332235307503e-39	7.02273e-38
USH1C	477.859439844798	-2.84084	0.217220541257392	-13.0781596795407	4.38938786806194e-39	7.12418e-38
FLJ35220	288.992190521866	-0.686302	0.0524780857758161	-13.0778872053108	4.40514775611605e-39	7.14387e-38
GNG10	738.193364584923	0.726914	0.0555855921883722	13.0773858045111	4.43429590126233e-39	7.18524e-38
MRPL22	327.845751128076	0.697672	0.0534044735826514	13.0639282058768	5.29247705355326e-39	8.56877e-38
RNF2	515.053185321132	0.596435	0.045674329507421	13.0584307653139	5.68883538506796e-39	9.20294e-38
ACTB	107867.158773401	0.616108	0.0471924063138077	13.0552331977864	5.93280877235735e-39	9.58975e-38
COL5A2	1691.77373465318	2.03542	0.15591992534306	13.0542925924494	6.00653692828781e-39	9.70098e-38
CNTN1	3094.97692584179	-1.79584	0.137569849389722	-13.0539898714949	6.03045854293452e-39	9.73164e-38
DSTYK	960.91148543748	-0.874805	0.0670195833659445	-13.0529703880587	6.11171895199811e-39	9.85471e-38
HBXIP	1659.00108246934	0.731091	0.0560116947644597	13.0524651514991	6.1523925816458e-39	9.91219e-38
KIAA0513	1368.27473521622	-1.29221	0.0990297629401676	-13.0487458943301	6.4602068472476e-39	1.03996e-37
DYNC2H1	472.132620929876	-0.93292	0.071504500943461	-13.0470170023098	6.60846039386548e-39	1.06296e-37
ASF1B	298.384410591649	1.79442	0.137537626025822	13.0467518287137	6.63149645137638e-39	1.06493e-37
C2orf85	225.187259371084	-2.51973	0.193130557886091	-13.0467916182011	6.62803479032373e-39	1.06493e-37
RAB11FIP4	1010.90782070239	-1.48716	0.114003031672129	-13.0449283348822	6.79208304863892e-39	1.08983e-37
POLR1D	760.809663931064	0.663224	0.0508471031956884	13.0434982907449	6.92072031068226e-39	1.10957e-37
ZNF627	593.616780607483	0.809233	0.0620459996578152	13.0424667508958	7.01501180033539e-39	1.12377e-37
C10orf118	163.939538013752	-0.938715	0.0719776411527266	-13.0417552918585	7.08078835470055e-39	1.13339e-37
PRKCDBP	101.51551478725	1.84906	0.141839809443239	13.036229449774	7.61298706063973e-39	1.21758e-37
CREBBP	2282.09029739097	-0.679863	0.0521569223770442	-13.0349541019457	7.74135891917438e-39	1.23711e-37
FAM54A	31.7525690109231	1.54238	0.118388779904271	13.0280720950687	8.47213266053827e-39	1.3528e-37
TMEM111	1038.1748765408	0.59078	0.0453482986742778	13.0276029033267	8.52438110432865e-39	1.36004e-37
CCDC85C	837.77437296457	-0.802995	0.0616445300857567	-13.0262213725477	8.68009384594647e-39	1.38376e-37
DLG2	747.619920461073	-1.47038	0.112891539951657	-13.0247460592073	8.84950014316772e-39	1.40963e-37
IDI2	54.7842132343358	-0.924384	0.0709731069223406	-13.0244206764303	8.88730316534012e-39	1.41451e-37
PPIH	377.518714552579	0.730351	0.0560818858902233	13.0229366308578	9.06176600473405e-39	1.44111e-37
POC1A	174.552918946981	1.34633	0.10341041688106	13.0192818977104	9.50606640975955e-39	1.51055e-37
MSR1	1091.72661360965	1.71272	0.131555483667442	13.0190011111193	9.54108379682159e-39	1.5149e-37
TCF19	410.450693445739	1.24526	0.0956776856147632	13.0151161021451	1.00389598284183e-38	1.59138e-37
RGS9	271.065652242987	-1.86761	0.143504061145113	-13.0143404078564	1.01414184397954e-38	1.60634e-37
PPP4C	1594.52286041057	0.63592	0.0488637483546277	13.0141566469832	1.01658426576551e-38	1.60891e-37
TNFRSF4	21.5176319328578	1.76491	0.13561661586887	13.0139507727826	1.0193275491636e-38	1.61196e-37
RGPD3	174.950632195925	-0.719246	0.0552720844756265	-13.0128195861729	1.03453250506534e-38	1.63469e-37
RAP2A	3471.41949781854	-1.0076	0.0774647970267918	-13.0071886639514	1.11364208919955e-38	1.75688e-37
ARNT2	6245.34444287186	-0.825745	0.0634955794270254	-13.0047660204056	1.14950197590463e-38	1.812e-37
ATF5	738.803374583031	1.01458	0.0780207411333265	13.0040222731451	1.16073949937186e-38	1.82826e-37
MYOM1	185.712410787877	-1.82922	0.140702270077895	-13.0006296254558	1.21340145967915e-38	1.90968e-37
LRRC1	380.460696755846	-0.968444	0.0745014783029432	-12.9989944393335	1.23962509440011e-38	1.94939e-37
TGFB1I1	522.51923012752	1.1267	0.0866854209779406	12.9975313353738	1.26356623387614e-38	1.98546e-37
CIRBP	8101.44620017848	-0.737289	0.0567312611922765	-12.9961687042685	1.28627650785299e-38	2.01954e-37
NRP1	1315.01534526428	1.32897	0.102302682745472	12.9905241297341	1.38475461274535e-38	2.1707e-37
PRRT1	364.962330959106	-1.22393	0.0942314454778596	-12.988534247001	1.42122903645628e-38	2.2261e-37
SOCS1	58.3510286006194	1.75207	0.134928388091315	12.9851503401036	1.485462012374e-38	2.32302e-37
C21orf125	5.91294209463986	-2.56453	0.197526917525253	-12.9832007974621	1.52376990400009e-38	2.38104e-37
DHFRL1	339.898923824559	-0.699759	0.0539052584258873	-12.9812779231441	1.5625156006398e-38	2.4358e-37
NAA20	1017.37870086258	0.612184	0.0471677878128022	12.978851768508	1.61280272694382e-38	2.5122e-37
AKAP9	1006.40274899482	-0.922438	0.0710892049430414	-12.9757772912341	1.67884511677286e-38	2.61301e-37
C10orf58	2430.00713752881	-0.980251	0.0755483848506692	-12.975143398504	1.69279238786078e-38	2.63264e-37
TIPIN	132.158240750514	0.649315	0.050059541410704	12.970844783957	1.79046057723959e-38	2.78234e-37
LOC90110	250.081313180709	-0.605293	0.0466933696495954	-12.963141545905	1.97970516674e-38	3.074e-37
UNKL	488.6137548173	-0.654033	0.0504716878644664	-12.9584148751089	2.10553529554883e-38	3.26424e-37
OAT	1755.58576018777	-0.710519	0.0548497161718	-12.9539236079812	2.23245524728716e-38	3.45829e-37
ATP6V0E1	3139.74133046435	0.73829	0.0569986644138196	12.9527577019392	2.26662815197085e-38	3.50847e-37
GSTK1	1647.33124475594	0.843506	0.0651365862658674	12.9498002632794	2.35566166752454e-38	3.64342e-37
CLEC5A	207.460823994225	2.44832	0.189190919670422	12.9410129890602	2.64123712189708e-38	4.08191e-37
KIAA0913	1628.75126334099	-0.642737	0.049667785731793	-12.9407252049928	2.65115016540763e-38	4.09402e-37
MCM2	1100.85634262734	1.29554	0.100117985127396	12.9401308871699	2.67173932236183e-38	4.12259e-37
LOC254559	1363.34040771258	-1.8721	0.144692109509129	-12.9385158142643	2.72849728631137e-38	4.20688e-37
FAM162B	22.1786483445473	1.59136	0.12299506940107	12.9384320381251	2.73147388542832e-38	4.20818e-37
TARBP2	460.102403435952	0.737468	0.0570007425237399	12.9378696195548	2.75154059135487e-38	4.23578e-37
JRKL	288.326723143211	-0.769752	0.0595092980891273	-12.934988391521	2.85666227979992e-38	4.39418e-37
SASH1	2015.40573037155	-0.917096	0.0709106973078386	-12.9331060963355	2.92748427018984e-38	4.49961e-37
TMED4	1279.36307806779	0.585083	0.0452489291874625	12.9303069022465	3.03604519227401e-38	4.66284e-37
MRPL15	882.063356703091	0.621613	0.0480754428803445	12.9299501808675	3.0501643242977e-38	4.68087e-37
SCN11A	11.5874920699129	-1.79026	0.138553226419956	-12.9211262909823	3.42096859237336e-38	5.24584e-37
MAGT1	2018.71843918987	0.792741	0.0613669126101242	12.9180446714956	3.56075541865949e-38	5.45595e-37
DOK2	42.7870182393495	1.95073	0.151021146049432	12.9169052046396	3.61386897793181e-38	5.52874e-37
UQCRB	3375.55522313577	-0.679618	0.052614580175507	-12.9169121516736	3.61354278399769e-38	5.52874e-37
ASB1	854.544667942617	-0.674127	0.0521914068582841	-12.916442293368	3.63567079703386e-38	5.55779e-37
RMRP	56.6628290952925	2.46306	0.190697639270441	12.9160661189585	3.65348381277906e-38	5.58069e-37
C14orf49	59.4784609945646	-1.33582	0.103442340541639	-12.9136931523266	3.76786813136965e-38	5.75096e-37
VPS13C	1214.29171102319	-0.739728	0.0573015392426026	-12.909389597258	3.98447004249506e-38	6.07216e-37
CHD7	1837.77476460992	-1.28703	0.0997081361293388	-12.9079963789882	4.05721027379337e-38	6.17824e-37
WNK2	645.745420968902	-2.10515	0.163105775745886	-12.906650732715	4.12871963633045e-38	6.28228e-37
ALPK2	50.8677846163576	3.17638	0.246134365550991	12.905074943986	4.21405316429388e-38	6.40718e-37
CYP19A1	53.7675251629866	1.89663	0.147003964548178	12.9018672017316	4.39321645228534e-38	6.6693e-37
CDCP1	172.13694154772	1.63251	0.126554431602884	12.8996652574696	4.52056549337596e-38	6.85735e-37
C1orf85	696.842924018685	0.962052	0.0745977020919752	12.8965421751826	4.70750593484811e-38	7.13544e-37
MAP1LC3B2	467.039406247796	0.587971	0.0455967354726666	12.8950153860723	4.80167295037161e-38	7.27258e-37
CISH	103.080092094531	1.61279	0.12507455667405	12.8946472641545	4.82465617453214e-38	7.30178e-37
NOG	124.144141779395	-1.74423	0.135269912883158	-12.8944183871169	4.83900092096401e-38	7.31788e-37
SLC27A3	446.171714033588	1.39673	0.108332621943119	12.8929973540485	4.92901705118613e-38	7.44259e-37
MOBKL1A	908.293768691569	-0.597251	0.0463300206289687	-12.8912261664934	5.04354755686882e-38	7.60388e-37
ARHGAP31	1985.66385759565	-0.836048	0.0648660510576636	-12.8888315882009	5.20260518001104e-38	7.83754e-37
FAM196B	62.3388256418918	-2.08529	0.161791310235698	-12.8887741302694	5.20648240778439e-38	7.83754e-37
ANKS1A	954.906392800892	-0.668997	0.0519057205522259	-12.888698464965	5.21159264073697e-38	7.83925e-37
LOC619207	27.7506690771457	-1.80382	0.139964209740311	-12.8877535735158	5.27582956149747e-38	7.92983e-37
TP53BP2	2029.50390868734	-0.687381	0.053339804447464	-12.8868334575019	5.33913842937801e-38	8.01887e-37
UQCRHL	534.805168117615	0.765913	0.0594355756664591	12.8864397374042	5.36645864195468e-38	8.05377e-37
RNF14	1304.70589649966	0.584512	0.0453961100482478	12.875817437636	6.15835943629938e-38	9.22818e-37
BEX4	2151.03995391479	-0.812249	0.0630996750873786	-12.8724756865431	6.4307369259262e-38	9.62902e-37
CD164	3426.80785899593	0.813408	0.0632000168571812	12.87037708824	6.60787569358356e-38	9.88675e-37
SAT1	5269.95488228921	1.12049	0.0870607101598684	12.8701577321237	6.62666883788593e-38	9.90735e-37
FAM96A	739.075903537718	0.653522	0.0507819848397329	12.8691750233485	6.71151586926534e-38	1.00266e-36
GAPDH	73432.1848219154	0.770654	0.0598859404222879	12.8687031192602	6.75264299021954e-38	1.00804e-36
COL4A1	5618.36336023196	2.00912	0.156180673620486	12.8640616409357	7.17074482298546e-38	1.06965e-36
GLTSCR2	3573.17533502119	-0.91415	0.0710809892953015	-12.8606842974685	7.49105523973306e-38	1.11658e-36
MMP14	3479.18220023883	1.49104	0.115959801050968	12.8582659776308	7.72911097871872e-38	1.15119e-36
TJP1	3505.65453651511	-0.650441	0.0506178559696642	-12.8500219085502	8.59858894932231e-38	1.27396e-36
ZEB1	3995.00445035517	-0.954815	0.0743043947050973	-12.8500532557244	8.5951053079968e-38	1.27396e-36
RASSF4	5002.3448597801	-1.00178	0.0779617365769589	-12.8496156388423	8.64386526289223e-38	1.27971e-36
PRIM1	164.493206310832	0.899329	0.0700063474599575	12.8463895045311	9.01191309330806e-38	1.3332e-36
PLK5P	17.7013484162924	-2.34798	0.182861577922289	-12.8401804492319	9.76466054912461e-38	1.44347e-36
PCDHGA3	98.2508162606027	-2.23574	0.174126021760931	-12.8397853392062	9.81462300686548e-38	1.44977e-36
RNF39	36.3174243732529	-1.21748	0.0948246563032146	-12.8393022015118	9.87606220729178e-38	1.45775e-36
C11orf10	1164.93140148698	0.668711	0.0520870354010397	12.8383376987666	9.99986093399879e-38	1.47492e-36
PVT1	54.1420009824896	1.61401	0.125731928428129	12.8369035148924	1.01868033728671e-37	1.50137e-36
TMED3	1090.46014049838	0.758636	0.0591015598376138	12.8361362264098	1.0288239830938e-37	1.51519e-36
MAP4K5	1003.17147280327	-0.809104	0.0630338813136435	-12.8360235641072	1.03032182183346e-37	1.51626e-36
GABARAPL3	1.9958923150734	-2.21054	0.172272687370576	-12.8316579280525	1.09006271927324e-37	1.60299e-36
COMMD8	266.850188090536	0.747126	0.0582326827937655	12.8300044625027	1.11357762639447e-37	1.63635e-36
PHF17	1101.28718640667	-0.926771	0.0722440522236823	-12.8283337382102	1.1378501125479e-37	1.67077e-36
C18orf1	1409.23704496685	-0.807886	0.0629774761023314	-12.8281795467445	1.14011655826923e-37	1.67285e-36
BTBD9	596.620808015762	-0.703478	0.0548389266470969	-12.8280722515537	1.141696327332e-37	1.67392e-36
STK19	379.432815818283	-0.603001	0.0470122589558853	-12.8264543501811	1.16578310126073e-37	1.70797e-36
TXNDC9	420.680879334639	0.611009	0.0476494600503368	12.8230049714967	1.21883585737634e-37	1.78437e-36
PIGY	2111.02828729406	0.580074	0.0452450232172541	12.8207217811973	1.2552652550703e-37	1.83634e-36
PRICKLE3	56.2019136231839	1.38334	0.107913733239312	12.8189037883463	1.28504453145122e-37	1.87851e-36
FAM26E	46.6405987550582	1.37554	0.107371364922481	12.8110412640942	1.42213276594051e-37	2.07583e-36
PTPN12	1733.42695888003	0.609962	0.0476139636794146	12.8105745231812	1.43071314557986e-37	2.08681e-36
CXCL6	21.2626505432833	4.1322	0.322710820063134	12.8046630012062	1.54394625562321e-37	2.2503e-36
CENPN	315.932086514126	1.12669	0.0880024607785685	12.8029059302927	1.57928846186914e-37	2.30012e-36
GRIK4	400.560795165009	-1.0478	0.0818574008639258	-12.8002767974008	1.63367884562996e-37	2.37758e-36
FOXS1	52.9185608599432	1.35663	0.105990619196747	12.799555468009	1.64892419846233e-37	2.39799e-36
CAMSAP1L1	2201.30800963672	-0.623861	0.0487528519959137	-12.7964036796165	1.71721355469375e-37	2.49546e-36
SLC25A5	4586.29496606996	0.665184	0.0519953443460486	12.7931527188846	1.7905974657094e-37	2.60019e-36
CHD4	5881.40259473578	-0.607197	0.0474832795915483	-12.787605366539	1.92308496420593e-37	2.79053e-36
DSCAML1	683.644577268506	-2.02491	0.158359372432739	-12.7867750690038	1.94373617098237e-37	2.81842e-36
LMX1A	6.60573120492887	-5.51558	0.431376344085441	-12.7860083227202	1.96300243225242e-37	2.84217e-36
GINS2	248.076383795115	1.4022	0.109682052304683	12.7842028755649	2.00912142497896e-37	2.90681e-36
PPIC	271.233355705283	1.38679	0.108478753653089	12.7839539613887	2.01556368805056e-37	2.914e-36
AKR1C1	336.706220874757	-2.29442	0.179577474111158	-12.7767863036709	2.21014558347397e-37	3.19063e-36
MRPS17	456.353267521301	1.55646	0.121836256403214	12.7750470763997	2.26010918728822e-37	3.26038e-36
IPCEF1	215.016245587895	-1.50779	0.118030956323494	-12.7745537861927	2.27448343252303e-37	3.27871e-36
HYAL2	1401.00374254157	0.811023	0.0634954480085368	12.772926318464	2.32255461059324e-37	3.34556e-36
IKZF5	539.568669021012	-0.695587	0.0544831898824189	-12.766995381964	2.50644257594589e-37	3.60781e-36
KLHL32	370.655510089947	-1.67062	0.130869716265232	-12.7654897984856	2.55538173950824e-37	3.67557e-36
BIRC6	1423.91803522471	-0.697445	0.0546411964188458	-12.7640887582419	2.60177539265408e-37	3.73958e-36
NKD1	285.40944133561	-1.39266	0.10911195657656	-12.7635995101571	2.61817265801604e-37	3.75858e-36
PRIM2	129.565928849726	0.708383	0.0555003232644462	12.7635806265379	2.61880760163794e-37	3.75858e-36
DOK6	237.446122066237	-1.97337	0.154685665502935	-12.7572894097541	2.83909378292931e-37	4.06882e-36
MRPL13	565.99516510555	0.757623	0.0593991253212758	12.7547771137513	2.93212214418216e-37	4.19909e-36
ZNRF3	683.058380560339	-0.802938	0.0629617454573539	-12.7527935452671	3.00770737934303e-37	4.30421e-36
MPZL2	78.4726748244	1.8149	0.142439933658475	12.7415011414277	3.47640721303595e-37	4.97134e-36
CNN3	13948.032620991	0.807646	0.0634051109516185	12.7378695217534	3.64204995149442e-37	5.20067e-36
OSTM1	839.97136338438	0.688141	0.0540725095081835	12.726256901569	4.22618826320927e-37	6.02606e-36
RNF7	1031.5470824267	0.593297	0.0466304170312518	12.72339501261	4.38390428216597e-37	6.24192e-36
PDLIM1	451.456949532441	1.76703	0.138885625223178	12.722901180094	4.41170470210136e-37	6.27697e-36
PARD3	556.95683943325	-0.901446	0.0708528558275086	-12.7227936920607	4.41777894872772e-37	6.28108e-36
UBR5	2161.18249787968	-0.630323	0.0495633460282997	-12.7175202595554	4.72621919697766e-37	6.70994e-36
IL1R2	33.2317145435086	3.08417	0.242551447280746	12.7155291339645	4.8481658350965e-37	6.87812e-36
C11orf2	2519.27767040965	-0.681685	0.0536215460953688	-12.7129009679231	5.01392856416869e-37	7.10307e-36
C18orf10	1396.33065618818	0.585604	0.0460642702592739	12.7127642492355	5.02270412699571e-37	7.11039e-36
COL6A1	7283.59466108241	1.57499	0.123908312282688	12.7109328446238	5.14173894167973e-37	7.27368e-36
HSPA1L	115.505359416993	-0.69593	0.0547602359764532	-12.7086735528367	5.29245444146988e-37	7.48152e-36
IDI1	1437.43935432172	-0.825613	0.0649700870415073	-12.7075933381775	5.36605825486624e-37	7.58013e-36
LMAN2	2214.59975004821	0.648315	0.0510310590712474	12.704315347989	5.59570024288259e-37	7.89322e-36
USP46	1318.76633626925	-0.909932	0.0716527960836381	-12.6991878817382	5.9746476041601e-37	8.42173e-36
FBLIM1	400.948379534992	1.75872	0.138560947916752	12.6927616213516	6.48578480162362e-37	9.13569e-36
XRCC6BP1	121.28179414915	1.61568	0.127294760264137	12.6924112646987	6.51486853319246e-37	9.17011e-36
TNIK	1244.48713699085	-1.01379	0.0798745397911664	-12.6922371431718	6.52937085336393e-37	9.18397e-36
LUZP2	1734.71781126045	-2.23596	0.176191752130493	-12.690512763555	6.67473546656386e-37	9.38174e-36
TMEM194B	68.9797793807357	0.770689	0.0607360028992155	12.6891610357466	6.79093079420676e-37	9.53826e-36
TYMS	952.397627742215	1.63537	0.128896205564892	12.6874853972733	6.93776396550775e-37	9.73756e-36
CBL	1435.26223552936	-0.686973	0.0541538989591212	-12.6855666281838	7.10978114798087e-37	9.9719e-36
MYH14	1106.94730314687	-1.44896	0.114240189048441	-12.6834708605586	7.30251271128173e-37	1.02277e-35
FPGT	346.726491089502	0.790431	0.0623256934665951	12.682271896802	7.41509800563129e-37	1.0378e-35
DYRK3	146.972042074593	1.11246	0.0877655020229682	12.6753441690627	8.10023707001721e-37	1.13288e-35
FBRSL1	581.566752367226	-0.741849	0.058530242562442	-12.6746337880217	8.17395410165808e-37	1.14238e-35
RASA4P	226.9421640239	-1.05339	0.0831426855659717	-12.669628390751	8.71261556177074e-37	1.2168e-35
HIST1H4J	43.8767591732613	1.68548	0.133051261390864	12.667893777476	8.90740279931946e-37	1.24313e-35
PPP1R3F	371.282599221329	-0.851278	0.067216409717462	-12.664728711073	9.27404168585168e-37	1.29284e-35
MRPL49	1323.55032596177	0.607898	0.0479998455681412	12.6645916230017	9.2902563647359e-37	1.29381e-35
PLK1	369.873336088776	1.51473	0.119603829579621	12.6645318826844	9.29733121841272e-37	1.29388e-35
TICAM2	105.146092620871	1.12064	0.0884985760210694	12.6627705859542	9.50833935853181e-37	1.32232e-35
C7orf44	866.511628965998	0.594847	0.0469858360539096	12.6601379577126	9.83264085693946e-37	1.36645e-35
LSM2	916.973842236535	0.835527	0.0660223816684714	12.6552143681813	1.04689425583895e-36	1.45386e-35
GALNT13	1600.64433917426	-2.1521	0.170075306948826	-12.6537934978916	1.06600632540601e-36	1.47936e-35
JPH3	645.237058563351	-2.24018	0.177059601659167	-12.6520971913581	1.08927787071539e-36	1.50953e-35
PFKM	3250.47497550888	-0.665554	0.0526048617902486	-12.6519478162353	1.09135116936814e-36	1.51134e-35
PLEKHG3	684.352667604235	-1.18566	0.0937166766153713	-12.6515362970716	1.09708328620956e-36	1.51821e-35
GGTLC2	14.5271485426123	-1.16944	0.0924600090437924	-12.6480709505666	1.1465548644769e-36	1.58556e-35
DEDD2	386.84621545426	0.835503	0.0660751118920303	12.644745073777	1.19611866677666e-36	1.65294e-35
CNTN3	186.721326004752	-2.65794	0.210220959070214	-12.6435564507999	1.21434381795489e-36	1.67695e-35
MYD88	781.618184538674	1.02013	0.0807216062793436	12.6376622023951	1.30887944741326e-36	1.80624e-35
BNIP1	271.997776631463	0.67858	0.053696645813752	12.6372828026231	1.31520914524335e-36	1.8137e-35
YRDC	400.98999170512	0.597646	0.0472948278284784	12.6366102462906	1.32650455977614e-36	1.828e-35
SLC43A3	739.79527297141	1.45111	0.114855549443234	12.6342109681372	1.36759096793359e-36	1.8833e-35
DDAH1	4148.31743053746	-0.876866	0.0694514861344397	-12.6255853466275	1.52602473535435e-36	2.09855e-35
IGFBP5	16842.134991854	1.49808	0.118744703790189	12.6159591926926	1.72445157478639e-36	2.36812e-35
ZC3H7B	3110.82726813967	-0.683369	0.0541915520445094	-12.6102455932358	1.85414329325959e-36	2.54268e-35
ATG2B	708.809028712079	-0.636863	0.0505212223516861	-12.6058583481549	1.96026779139163e-36	2.68634e-35
TFAP2E	70.5799914386594	-1.46839	0.116498749731448	-12.6043519771635	1.99808076585829e-36	2.73626e-35
ALOX5AP	1095.97654509011	1.49015	0.11822957517772	12.6038784806152	2.01011556597001e-36	2.75083e-35
MYL6	13343.5298433941	0.97587	0.0774365792075063	12.602183203574	2.05379790442043e-36	2.80866e-35
TRNAU1AP	375.184152165648	0.634048	0.0503400646558297	12.5952895769178	2.2413585594624e-36	3.06303e-35
KIAA1755	668.392471443939	-1.19936	0.0952805181469381	-12.5877062987329	2.46739243604588e-36	3.3696e-35
MLL3	2441.21370618236	-0.775796	0.06163563417005	-12.5868088096725	2.49560018042345e-36	3.4034e-35
EIF4EBP1	620.356212664202	0.979735	0.0778429386059304	12.5860505066179	2.51968297896104e-36	3.43387e-35
SMOC1	7310.82796234257	-2.35213	0.186917391191723	-12.5838180355536	2.5919326985551e-36	3.5299e-35
LMTK3	694.607133509833	-1.02564	0.0815126927457324	-12.5826166400275	2.63166188099676e-36	3.58153e-35
NCKAP5	279.220184609263	-0.949574	0.0754951421253032	-12.5779489153895	2.79184683298173e-36	3.79429e-35
PQLC3	254.466508471542	1.04983	0.0834683043036346	12.5775881354307	2.8046239427333e-36	3.80903e-35
CAB39L	1107.62126406884	-1.10172	0.0876143773236065	-12.5746491893952	2.91089566957665e-36	3.95064e-35
SSBP2	712.858259602677	0.743568	0.059138411998874	12.5733494070228	2.95916279632029e-36	4.01339e-35
IDH1	2415.10039088659	0.757974	0.0602878207612925	12.5725940419551	2.9875776670098e-36	4.04914e-35
TMEM159	189.532559646821	1.21461	0.0966314016671165	12.5695329561181	3.10553043310865e-36	4.20612e-35
GMDS	171.973370040892	0.594384	0.0472964605997321	12.5672015434826	3.19846115095089e-36	4.32901e-35
CATSPER1	4.39376597012558	2.84606	0.226509581571976	12.5648509614616	3.29495344920993e-36	4.45349e-35
POU6F1	801.427654917751	-0.709166	0.0564795439146377	-12.5561610830078	3.67746864561923e-36	4.9637e-35
SLC38A6	155.497673867806	0.841929	0.0670543052000562	12.5559217940178	3.6886037288086e-36	4.97533e-35
SLC10A3	282.926392152752	0.728546	0.0580312262160566	12.5543740243001	3.76144138829002e-36	5.0701e-35
ZNF407	264.476533250431	-0.622515	0.0495913147512114	-12.5529065656193	3.83181904483936e-36	5.16144e-35
ZNF416	170.799427356661	0.62085	0.0494607363406622	12.5523827879886	3.85725443557049e-36	5.19215e-35
ANKRD11	2296.27578679519	-0.589149	0.0469361300353173	-12.552143219019	3.86894410134961e-36	5.20434e-35
TMCC1	1079.94857934836	-0.696393	0.0555106666803485	-12.5452192784336	4.22243899635197e-36	5.67597e-35
TM9SF1	1278.59849549266	0.583739	0.0465415386999649	12.542319158372	4.37987291715624e-36	5.88359e-35
LAMC1	2563.36892890103	1.35315	0.107899620178917	12.5408653750569	4.46097322909053e-36	5.98845e-35
UPB1	4.65350619107485	-1.80457	0.143898472591529	-12.5406022955098	4.47580795903905e-36	6.00428e-35
PACS2	2952.45972235428	-0.773522	0.0616933842662203	-12.5381752776447	4.61499770175277e-36	6.1868e-35
GNG11	586.146710411412	1.22601	0.0978028110957042	12.5355216991616	4.77210702734974e-36	6.39307e-35
CTHRC1	214.603406211841	2.45582	0.195984915705535	12.5306788875108	5.07265834112343e-36	6.78649e-35
DBP	455.518711304542	-1.07252	0.0856051490706465	-12.5286295139138	5.20544134984999e-36	6.95941e-35
GIT1	2350.75133878405	-0.58077	0.0463568899339445	-12.5282446216327	5.23076182857405e-36	6.98852e-35
ACOT9	443.227381218552	0.773948	0.0617941105990546	12.5246282745596	5.47472476861848e-36	7.30952e-35
FRAT2	208.040343052794	-0.67845	0.0541711944904715	-12.5241792970314	5.50579175637224e-36	7.34106e-35
PSMB8	1422.87302853372	1.08155	0.0863703505655839	12.5222048256102	5.6445077086099e-36	7.51585e-35
KIAA1244	342.218873244262	-1.7292	0.138161576057032	-12.5157961681445	6.11912157286681e-36	8.14231e-35
RFC4	355.806863504393	0.832557	0.0665271737634759	12.5145434231182	6.21642963357409e-36	8.26065e-35
BGN	4487.76590358694	1.52697	0.122062407055207	12.509773403076	6.60122662198718e-36	8.76607e-35
CRIP1	147.509622749312	1.65377	0.13220416604736	12.509197911262	6.64922312537857e-36	8.82387e-35
CCBL1	408.541602494167	-0.912179	0.0729628387845267	-12.5019690500248	7.28248417135985e-36	9.65774e-35
ZNF540	210.253591925061	-0.985314	0.0788286517659373	-12.4994337873088	7.51848678165735e-36	9.96402e-35
NAT8L	938.647376730197	-1.06669	0.0853492775245286	-12.4978853033296	7.66635458619621e-36	1.01532e-34
ATP6V0A1	3305.6127795725	-0.620549	0.0496558617633098	-12.496989793195	7.75318377171936e-36	1.02613e-34
KIAA1737	1551.31136291228	-0.647554	0.0518392665995148	-12.4915658577344	8.30037294406125e-36	1.09707e-34
ZNF557	197.795340737301	0.584993	0.0468403986964932	12.4890713763144	8.56474660002703e-36	1.13126e-34
TGIF1	713.487473085071	0.963803	0.0771767781149212	12.4882558800636	8.6529775868525e-36	1.14138e-34
COX7A2	2041.99706667831	0.842794	0.0674936543428687	12.4870053854056	8.79002978752254e-36	1.15869e-34
GTPBP1	1575.53817191171	-0.636009	0.0509696875160484	-12.4781844225566	9.82003292231595e-36	1.29359e-34
TSPYL2	1680.35732747333	-1.14255	0.0915719157713045	-12.4770685229993	9.95860071471259e-36	1.31097e-34
C1QTNF6	342.92771384013	1.28906	0.103353693036717	12.4723068509422	1.05720517802136e-35	1.3908e-34
ZCCHC14	1176.29804641695	-0.717329	0.0575143816399455	-12.4721693457873	1.05903136753057e-35	1.39227e-34
TPPP	2366.65823986915	-1.78079	0.142791201656537	-12.4712891445966	1.0707956959364e-35	1.4068e-34
COL5A1	954.49996513805	2.47852	0.198749454563261	12.470566077762	1.08055693071174e-35	1.41868e-34
FSD1L	201.559863724718	-1.14973	0.0921985367302764	-12.4701674612545	1.08597591709488e-35	1.42485e-34
KIAA1107	217.431803152779	-1.19733	0.0960392940388726	-12.4671181490711	1.1283330187501e-35	1.47944e-34
SGCD	277.165775679072	-1.89031	0.151729945506714	-12.4583905864387	1.25885472565303e-35	1.64838e-34
NDST1	3821.64444382651	-0.637279	0.0511573202273382	-12.4572469213019	1.27703449481106e-35	1.67108e-34
USP43	152.105055901099	-2.05082	0.164677119333169	-12.4535660913141	1.33733476367447e-35	1.74882e-34
SRRM2	10258.4227474579	-0.733676	0.058928022484789	-12.450371060413	1.39196505298858e-35	1.81906e-34
MYH3	83.8301608592326	-1.37257	0.110245579986618	-12.4501491849433	1.39584010720821e-35	1.82291e-34
DLG5	2369.31608098303	-0.882923	0.0709323942679126	-12.4473811603947	1.44509421648272e-35	1.88599e-34
ZMAT1	842.400519454049	-1.18571	0.0952608489128592	-12.4469829228894	1.45232112118488e-35	1.89416e-34
CDCA8	253.973814489295	1.64887	0.132493290457794	12.4449167719498	1.49039650205022e-35	1.94254e-34
SEMA4D	1194.32301734465	-1.1264	0.0905933611039149	-12.4335643865283	1.71799590785286e-35	2.23623e-34
LIMS3	5.66256690598478	3.52102	0.283209271654683	12.4325607397811	1.73970673563828e-35	2.263e-34
BCL2	612.731823644324	-0.833347	0.0670362901751751	-12.4312743336273	1.76793328702021e-35	2.29793e-34
FN1	22354.5936294922	1.71992	0.138354805300561	12.4312310741326	1.76889036202114e-35	2.29793e-34
ANXA5	10049.3793982822	1.02823	0.0827353734853341	12.4279201740715	1.84368917283265e-35	2.39352e-34
PRG4	11.9486748843678	2.98153	0.239915962609597	12.4273899930286	1.85595536067465e-35	2.40786e-34
PPP1CB	8421.16992443032	0.643813	0.0518159042896422	12.4250127158892	1.9119602361729e-35	2.47563e-34
PPP1R2P1	5.71323588784167	-1.61333	0.12987882903805	-12.4218229927679	1.98975160098608e-35	2.57467e-34
RNF32	43.0995267937973	-1.28638	0.103586077094794	-12.4184638969933	2.07507503855716e-35	2.68331e-34
C19orf40	30.9938836641402	0.945117	0.0761070252484684	12.4182612364419	2.08033750532893e-35	2.68701e-34
HECA	781.716249962045	-0.615966	0.0496017018297653	-12.4182487776462	2.08066145398887e-35	2.68701e-34
NIN	1276.64205091187	-0.783584	0.0631130714402617	-12.4155507897413	2.15200732810556e-35	2.77733e-34
SLC25A24	220.97473880319	1.20379	0.0969643377821052	12.4148157527297	2.17186257094619e-35	2.79929e-34
GRIN2C	333.142393458491	-1.85183	0.149163409361541	-12.4147499136546	2.17364991144752e-35	2.79976e-34
TBC1D5	2184.18624165354	-0.596098	0.048021412607398	-12.4131711059423	2.21695044615941e-35	2.85367e-34
FAM57A	563.332593148562	0.706966	0.0569558787981552	12.4125232893475	2.23496453468424e-35	2.87498e-34
GNAZ	923.184919982173	-0.855738	0.0689480536596943	-12.4113471335199	2.26804289245835e-35	2.91563e-34
RBBP8	619.882054608401	0.866566	0.0698220124919878	12.4110646060669	2.27606091869037e-35	2.92213e-34
CLN5	907.912569949222	0.720121	0.0580311378331081	12.4092234905255	2.32900533020124e-35	2.98816e-34
DICER1	1303.87106097153	-0.691273	0.05570811820744	-12.4088298959681	2.34048160922091e-35	3.00093e-34
PARVB	322.316654389515	1.05916	0.0853606946558335	12.4080995180533	2.36192676801156e-35	3.02449e-34
DENND5B	867.195890415851	-0.825701	0.0665499370491746	-12.4072387579478	2.38745092836296e-35	3.05519e-34
SLC30A7	503.930642446208	0.616739	0.0497135812258845	12.4058410942167	2.42948098344486e-35	3.10696e-34
RPL39L	104.085220908522	1.91333	0.154305187692371	12.3996753089479	2.6238462053404e-35	3.35335e-34
SERPINE1	3150.35973038102	2.41884	0.195098026845552	12.3980819686818	2.6765369552761e-35	3.41627e-34
CENPK	118.900862090155	1.82887	0.147528137256678	12.3967691826394	2.72073891137791e-35	3.47044e-34
C7orf28B	787.53838099059	0.921035	0.0742996294016244	12.3962196526541	2.73945643096402e-35	3.49205e-34
FAM155A	305.789000695816	-1.67186	0.13488201303763	-12.3950045190966	2.7813005305116e-35	3.54082e-34
LOC150786	46.9664422266184	-0.727521	0.0586946614569952	-12.3950156754486	2.78091347881671e-35	3.54082e-34
ASB9	18.0210901043904	1.54717	0.124828079956076	12.3943727370079	2.80330676076707e-35	3.56653e-34
C5orf4	1371.17840145729	-0.851254	0.0687157994489575	-12.3880366208596	3.03380226174903e-35	3.85481e-34
IFRD2	570.436649499129	0.605296	0.0488630821895167	12.3875950258927	3.05055121095429e-35	3.8711e-34
ITGA4	213.146461451969	1.76563	0.142540178446907	12.3868638197257	3.07848687312948e-35	3.90404e-34
HIST1H1B	2.46011434190104	3.37863	0.272766575685967	12.3865318019791	3.09125535034178e-35	3.91771e-34
GOLGA4	1416.35830978922	-0.706941	0.0570989531875675	-12.3809736169068	3.31299169896119e-35	4.19334e-34
MAP3K5	1269.70238509221	-1.0321	0.0833642106621068	-12.3806426742512	3.32668178965245e-35	4.20796e-34
TAS2R4	6.52400688586638	-1.60291	0.129500406793857	-12.3776787620439	3.45182298618182e-35	4.36346e-34
C2orf79	376.370438535023	0.786177	0.0635224948373376	12.376348964334	3.50947867174034e-35	4.4335e-34
MGAT4C	74.9950073708282	-2.23144	0.180335549278281	-12.3738353490938	3.62108704352246e-35	4.57156e-34
ENHO	2067.92577494624	-1.50542	0.121670526004602	-12.3729308627899	3.66210456084379e-35	4.62039e-34
APC	3172.63218305035	-0.783579	0.0633315349708124	-12.3726581996641	3.67455986912276e-35	4.63314e-34
KIDINS220	3301.01604724366	-0.621003	0.050212112452404	-12.367585456314	3.91411285750025e-35	4.93203e-34
SSR4	2383.78234898693	0.764029	0.0617885506699584	12.3652131310417	4.03140612810137e-35	5.07659e-34
VDR	44.6496717376393	2.16395	0.175025554809106	12.3636135159319	4.1124594895929e-35	5.17535e-34
CBFA2T3	79.084904070872	-1.32204	0.106992315781031	-12.3564090311455	4.49805136376773e-35	5.65699e-34
SLC39A3	741.186399241258	0.635111	0.0514071557065192	12.3545344338793	4.60413863687179e-35	5.78672e-34
PEX5	1878.80363472717	-0.596986	0.0483380835685164	-12.350225809865	4.85748951810392e-35	6.10125e-34
PFN1	7438.07452002959	0.648131	0.0524830988054486	12.3493241985583	4.91223248660416e-35	6.16609e-34
WNK1	5686.6963562484	-0.735201	0.0595364470306339	-12.3487510294458	4.94735173998238e-35	6.20622e-34
GJA4	136.558306527637	1.13091	0.0915820148918371	12.3485581370936	4.95922666602639e-35	6.21716e-34
BTAF1	641.577872694962	-0.836108	0.0677270627263936	-12.3452556568735	5.16698478839496e-35	6.46939e-34
PCMTD1	669.98356249914	-0.587514	0.0476135837388523	-12.3392074059357	5.57015026692654e-35	6.96092e-34
C13orf34	110.388543497655	0.830852	0.0673362003189946	12.3388536112789	5.59467818900138e-35	6.98715e-34
C17orf58	259.47982082314	0.596153	0.0483179353440747	12.3381215933164	5.64576885895281e-35	7.04203e-34
MKX	121.193297028185	-2.48191	0.201157343883282	-12.3381370311541	5.64468661604499e-35	7.04203e-34
PDLIM7	614.588539635801	1.10054	0.0892008480871385	12.3377791044906	5.66983153643693e-35	7.06758e-34
SREBF2	3819.2707849546	-0.836832	0.0678393375072442	-12.3354986064843	5.83267418399364e-35	7.26597e-34
ZNF292	933.669164132816	-0.757271	0.06139565744036	-12.3342817891983	5.9214555511455e-35	7.37191e-34
UBN2	644.770275276803	-0.72546	0.058825330977018	-12.332433996061	6.0588480760264e-35	7.5382e-34
HK3	95.5399263597068	1.93387	0.156846257753157	12.3297023280076	6.2677835129848e-35	7.79323e-34
CD36	130.584106763533	2.2713	0.184235091050793	12.3282492220941	6.38182720422022e-35	7.93003e-34
FAM169A	923.712533906376	-0.870258	0.0706414007277314	-12.3193796227331	7.12402076938811e-35	8.84671e-34
HDGFRP2	1598.69396712242	-0.656895	0.0533294693357641	-12.3176659260938	7.27700831101182e-35	9.031e-34
QPCT	200.800222803668	1.29738	0.105420012202944	12.3068159222008	8.32428935925637e-35	1.03242e-33
TMEM126A	349.065055603104	0.654076	0.0531524525990059	12.3056688955134	8.44340170642689e-35	1.04654e-33
SYNGR1	1741.32447847504	-1.08383	0.0880838146331118	-12.3045354307189	8.5627689072184e-35	1.06066e-33
VPS13B	921.858182264009	-0.705693	0.0573559958790167	-12.3037349758698	8.64807485801621e-35	1.07056e-33
TTC5	239.228569409842	0.731548	0.0594794406496232	12.2991740893881	9.15049785625446e-35	1.13204e-33
KCTD14	82.2413005118554	1.59806	0.129973054995143	12.2953153351463	9.59814743678383e-35	1.18668e-33
C12orf34	808.715478545449	-1.41036	0.114731434585427	-12.2926693703018	9.9176107671192e-35	1.22464e-33
CHD9	1407.3718578107	-0.698667	0.0568435575636533	-12.2910444414522	1.01190110424076e-34	1.24873e-33
SPC25	125.894212991487	1.69413	0.137886644062961	12.2864125700838	1.07156772401577e-34	1.32071e-33
RTN3	11862.4992908115	-0.656656	0.0534476113636427	-12.2859667950523	1.07749126094594e-34	1.32718e-33
KIAA0101	210.603307396371	1.88409	0.153357143811515	12.2856244056148	1.08206307141952e-34	1.33198e-33
EPB41L2	3957.68634050118	-0.737557	0.0600344935044	-12.285557472367	1.08295905787603e-34	1.33225e-33
HRNR	8.78091021220031	-2.80221	0.228119219476656	-12.2839784451003	1.10431146516935e-34	1.35767e-33
ADAM12	446.007020928019	2.18624	0.178043635068874	12.2792462838443	1.17083943778861e-34	1.43856e-33
KIN	159.601672044136	-0.603231	0.0491402392040209	-12.275702975563	1.22324691787558e-34	1.50015e-33
MARCO	74.5823194476087	3.46733	0.282478568145564	12.2746668941508	1.23900686351973e-34	1.51759e-33
KCNJ9	310.140697512528	-1.68726	0.137470804841937	-12.2735979574316	1.25547800692391e-34	1.53681e-33
SAR1B	671.007494975834	0.719423	0.0586335057555318	12.2698337788902	1.31523072048634e-34	1.60796e-33
ZNF276	763.474409191443	-0.828672	0.0675397396894831	-12.2693939083446	1.32239506282546e-34	1.61571e-33
LCNL1	73.1709221387122	-2.37958	0.193989650995353	-12.2665373018564	1.36987451229461e-34	1.67269e-33
C1orf113	72.216607620129	1.27164	0.103690496810616	12.2637685759852	1.41750859231726e-34	1.72978e-33
LOXL2	936.180940188773	1.7507	0.142791004470808	12.2606075861992	1.47390587203953e-34	1.79749e-33
ATP5G3	2831.67250641132	0.743105	0.0606303640941151	12.2563246622575	1.55389222049777e-34	1.8927e-33
WWC1	1239.41853702852	-0.981964	0.0801475619307434	-12.2519453426102	1.64013808051635e-34	1.99651e-33
CCDC144A	35.4341610215037	-1.63054	0.133106529439378	-12.2498904197002	1.68223067862765e-34	2.04523e-33
C2CD2L	502.275727608824	-0.64311	0.0525101465209658	-12.2473500370057	1.73575348604435e-34	2.109e-33
B2M	39602.9194063673	1.03333	0.0843822289910227	12.2457984131106	1.76927303050838e-34	2.1484e-33
ZDHHC22	1293.92374246926	-1.66634	0.136112959826439	-12.2423173439767	1.8468320974446e-34	2.2412e-33
CAMTA2	1250.07680571218	-0.622685	0.0508639206520556	-12.2421755146371	1.85006271185124e-34	2.24374e-33
CHIC1	334.066952980314	-0.630837	0.0515557450612341	-12.2360215413165	1.99577996854254e-34	2.41749e-33
IL2RA	46.7957162834066	3.75138	0.306602414202707	12.2353395930515	2.0126133471622e-34	2.43639e-33
LOC643763	1950.74353565895	-1.62736	0.133008755123415	-12.2350049381442	2.02092556875583e-34	2.44495e-33
TFR2	85.9632674865777	1.82342	0.149068188469473	12.2321187895857	2.09404238621005e-34	2.52875e-33
LSAMP	2044.26603744295	-0.955743	0.078137268982008	-12.2315948752068	2.10759413658057e-34	2.54356e-33
FMN2	1559.51984518863	-0.832589	0.0680757766716487	-12.2303291770482	2.14069368235873e-34	2.58193e-33
CELSR2	4011.24782098278	-0.802768	0.0656411015752174	-12.2296469878383	2.1587474106327e-34	2.60211e-33
IL11	24.9801359374888	2.1974	0.179704153785005	12.2278598749079	2.20676261715335e-34	2.65836e-33
SLC16A9	729.014176864088	-1.11289	0.0910319933119552	-12.2252457145924	2.27891572877116e-34	2.74193e-33
RPPH1	96.2813807776824	2.11432	0.172960214598858	12.2243221315969	2.30496374177929e-34	2.77158e-33
TK1	271.994832401385	1.60743	0.131496027548965	12.2241699173944	2.3092849713984e-34	2.77508e-33
RGS11	499.411260196064	-1.65819	0.135672492226213	-12.221986149832	2.37217355294994e-34	2.84892e-33
AATK	1063.1583263331	-1.61083	0.131809065759883	-12.2209013421315	2.40404365092346e-34	2.88544e-33
PAQR6	2677.43693910596	-1.27322	0.10419041691564	-12.2201085298572	2.42760402967943e-34	2.91194e-33
MDM2	2434.47215160402	1.3775	0.112740155991571	12.218370367423	2.48006359089313e-34	2.97306e-33
AK3L1	378.543779490268	1.32553	0.108517083316234	12.2149825854341	2.58556835015347e-34	3.09766e-33
MLF1IP	341.772935163737	1.60479	0.13139262600139	12.2137266794291	2.62580342941024e-34	3.14395e-33
CLK2P	15.4210983842912	0.718211	0.0588263381992701	12.2090068960652	2.78264916928028e-34	3.3277e-33
TMSB15B	113.748761700921	1.11876	0.0916741218232104	12.2036221041143	2.97298736004695e-34	3.55317e-33
RRM2	680.806309859796	1.93271	0.158435324089861	12.1987435580601	3.15656991178527e-34	3.77029e-33
RGS12	1723.38046122073	-0.655688	0.0537538342495413	-12.1979794809494	3.18632520262582e-34	3.80353e-33
SLC9A6	1276.27355267695	-0.693497	0.0568543572521595	-12.1977874213044	3.19384825824769e-34	3.8102e-33
PPCS	499.773398221492	0.889179	0.0728993368994843	12.1973487727994	3.21109653766088e-34	3.82847e-33
TM4SF18	122.909341071057	1.15014	0.0942962283190578	12.1970450041846	3.22309534679382e-34	3.84045e-33
PLCXD3	212.427351669446	-2.14732	0.176059972014311	-12.1965146370099	3.2441516259958e-34	3.86087e-33
KIAA0467	995.798723095025	-0.630128	0.0516688700487766	-12.1954987000344	3.2848679929792e-34	3.90697e-33
DCAKD	2141.6770085349	-0.642922	0.05272749747218	-12.1932945490461	3.3749589312529e-34	4.01171e-33
TET1	82.7747819996462	-1.2486	0.102401224603692	-12.193236062412	3.37738260724854e-34	4.01217e-33
WBP2	6642.53610667538	-0.647091	0.053083905085231	-12.1899641871976	3.51575854110574e-34	4.17153e-33
RGS2	1065.75355986925	1.36703	0.112145070392514	12.1897916519112	3.52320982714696e-34	4.17785e-33
FNDC3B	748.358321780337	0.99371	0.0815304241396352	12.1882067945282	3.59239320614215e-34	4.25695e-33
PLBD1	155.748107660241	1.54525	0.12678301467134	12.1881651017049	3.59423131490738e-34	4.25695e-33
ADAMTS20	24.4829651919282	-4.01456	0.3294608880134	-12.1852378638711	3.72564723029236e-34	4.40995e-33
GGTA1	762.774237735449	-1.50581	0.123611282805945	-12.1817806412937	3.88701594887195e-34	4.59544e-33
C21orf71	9.43533827304521	-1.35705	0.111470798626127	-12.1740682541122	4.272450994215e-34	5.04507e-33
PRKCE	524.432130075668	-1.07089	0.0880020030613197	-12.1689477566235	4.54908921626668e-34	5.36531e-33
ROMO1	1176.67698385408	0.935506	0.0768932307488574	12.1662955265641	4.6992996977536e-34	5.53916e-33
ARAP1	2256.08065248024	-0.588412	0.0483705616891779	-12.1646763326572	4.79341516023353e-34	5.64672e-33
MKLN1	2754.95808417166	-0.622778	0.0512042257060239	-12.1626385473445	4.91452642467404e-34	5.78249e-33
SLC29A1	775.047010778746	0.736954	0.0605913498425197	12.1626860072854	4.91167147072346e-34	5.78249e-33
CDR2	295.917136228786	0.805957	0.0662653771776222	12.1625701851155	4.91864165390544e-34	5.78388e-33
AMZ1	116.440285494045	-1.52989	0.125871426910294	-12.1543834265785	5.43704351166676e-34	6.38205e-33
PIGT	2510.87792324234	0.653389	0.0537605429469019	12.1536974884554	5.4828665556883e-34	6.43201e-33
UBB	19572.5457101516	0.857614	0.0705736826440003	12.152040718941	5.59513294140648e-34	6.55981e-33
GPR158	705.553341717953	-1.28159	0.105471450483221	-12.1510326661436	5.66455513232697e-34	6.63726e-33
FAM63B	216.214010854082	-1.16068	0.0955398834662147	-12.1486026289365	5.83544341376933e-34	6.83343e-33
APBA2	2988.5637267338	-0.755784	0.0622154403872821	-12.1478524380985	5.8892266319713e-34	6.89232e-33
LDHB	14913.6723008513	-0.69325	0.0570706155557528	-12.1472302961582	5.93420296988585e-34	6.94084e-33
ANXA2	3934.11030081433	1.58374	0.130388254756673	12.1463199244616	6.0006318414282e-34	7.01437e-33
PDK4	1546.23293428319	-1.61091	0.13265353825262	-12.1437664418062	6.1909244294672e-34	7.22824e-33
CECR2	217.433662929067	-1.17497	0.096761870675632	-12.1428743857495	6.25880603040605e-34	7.30317e-33
NAP1L5	792.467606320644	-0.765497	0.0630475727484078	-12.1415794376994	6.35866365637412e-34	7.41531e-33
OSBPL11	1404.81215275409	-1.08741	0.0895611360752971	-12.1415002643075	6.36482005442287e-34	7.4181e-33
SLC6A1	2622.16164482069	-1.21938	0.100432190879141	-12.1413215778149	6.37873620364429e-34	7.42993e-33
FAM162A	984.096903524862	0.842375	0.0693860654903897	12.1404024482934	6.45079724261198e-34	7.50943e-33
TRMT2B	278.962526478076	0.649953	0.053540577706115	12.1394384521895	6.52724481531997e-34	7.59394e-33
TFAP4	204.252189055182	-0.850272	0.0700478945859596	-12.138441658016	6.60723980960819e-34	7.68247e-33
ALDH6A1	1031.06000625182	-1.03904	0.0856124207887617	-12.1365800951403	6.75925100736188e-34	7.84997e-33
LRRC42	541.858125267413	0.581691	0.0479540865939995	12.1301745011344	7.30935158060025e-34	8.47885e-33
TNKS2	1385.43626141214	-0.613476	0.0505784149401519	-12.1292095226972	7.39599003854863e-34	8.5743e-33
PIKFYVE	1066.70981321803	-0.634636	0.0523281398162952	-12.1280094244199	7.50516264190772e-34	8.69576e-33
PTPRB	570.558603326625	-1.10541	0.0911901499848246	-12.1220548486985	8.07098225170614e-34	9.34036e-33
HIRIP3	814.191229210534	-0.591428	0.0487947553162918	-12.1207302057427	8.20250463266384e-34	9.487e-33
FPR2	31.3565031265159	2.58282	0.213179647227183	12.1157020348534	8.72141478841402e-34	1.00813e-32
IGFALS	13.8070384054473	-1.66714	0.137678262060368	-12.1089409622081	9.47090617890296e-34	1.09412e-32
PHTF2	523.387491123923	0.613213	0.0506438277920589	12.1083365101194	9.54094888441424e-34	1.10157e-32
RAPGEF3	436.21926671659	-1.04797	0.0865667441630937	-12.1059086702554	9.82750396590871e-34	1.13332e-32
LBH	866.854088688808	1.15005	0.0950047361347657	12.1052116962521	9.91133505355727e-34	1.14232e-32
HEY2	518.401183529085	-1.18576	0.0979956520184958	-12.1001098068582	1.05470001746933e-33	1.21488e-32
BAI3	725.132094941187	-1.03961	0.0859420433237303	-12.0966429449091	1.10018962515644e-33	1.26653e-32
CYP2D6	13.2343316913099	-2.05929	0.170259488071664	-12.0950333245819	1.12196719733971e-33	1.29085e-32
ENPEP	205.506332074083	1.61473	0.133513594633404	12.0941466963347	1.13414528467973e-33	1.30334e-32
EGFL6	9.9703031664226	2.75353	0.227693750817112	12.09313939947	1.14814017300814e-33	1.31866e-32
NDRG3	1892.1931732929	-0.627774	0.0519450331384797	-12.0853583304245	1.26218681879627e-33	1.4488e-32
TET2	664.503994809356	-0.622452	0.0515067872391899	-12.0848459234147	1.27008028666462e-33	1.45701e-32
EFEMP2	1412.73497761514	1.51011	0.124968277542653	12.0839444703121	1.28408607547482e-33	1.47222e-32
NFKBIZ	216.36502311768	1.58021	0.130810438084251	12.0801647647175	1.34450046078182e-33	1.54059e-32
ICK	726.438678787619	-0.747872	0.0619427008901414	-12.0736130345621	1.45598458412133e-33	1.66736e-32
NAT1	44.3458042752404	1.20594	0.0999267091084225	12.0682901505035	1.5532814368314e-33	1.77672e-32
KCNK4	43.9103460232992	-1.84047	0.152518807692656	-12.0671746497648	1.57447600586947e-33	1.79992e-32
PRR4	74.9817860345653	0.799367	0.0662485573850027	12.0661834163302	1.59355038399488e-33	1.82067e-32
FAAH	273.721115167012	-1.28297	0.106336823386083	-12.0651199290541	1.61427043289608e-33	1.84328e-32
ACACA	1914.92608083424	-0.644565	0.0534279337579939	-12.0641874641455	1.63265779863444e-33	1.8632e-32
DGCR9	86.0432161087086	-1.54132	0.127764752125252	-12.0637418425629	1.64151836934496e-33	1.87222e-32
PTPRD	1610.34146861333	-1.17659	0.0975603965706	-12.0601226314751	1.71527323734908e-33	1.95521e-32
TMEM26	32.8823225006357	1.70729	0.141651340285267	12.052744181822	1.87598531911719e-33	2.13717e-32
RAB34	862.751970922762	1.57393	0.130677042508604	12.0444113406001	2.07552741703264e-33	2.36177e-32
SLC25A27	289.124622342369	-1.31842	0.109473644008664	-12.0432773942111	2.10426296004558e-33	2.39308e-32
WEE1	763.459904637809	1.30081	0.108020553530593	12.0422420391034	2.13084502715682e-33	2.42192e-32
CHD8	1749.83896069869	-0.59786	0.0496650717360428	-12.0378363749047	2.24773722453579e-33	2.55184e-32
HECTD1	2000.58871891796	-0.595906	0.0495279279697905	-12.0317088022072	2.42097495277597e-33	2.74693e-32
SEC61G	7223.03702162486	2.47237	0.205578059247639	12.0264290116148	2.58083850776277e-33	2.92663e-32
FSTL1	4144.17113775183	1.30786	0.108770915251276	12.0239959443186	2.65799512071201e-33	3.01239e-32
ERRFI1	855.313478829747	1.1887	0.0989260139868574	12.0160740998431	2.92543504662824e-33	3.31169e-32
KRT75	19.8796840054888	4.09642	0.340910838384491	12.0161044812572	2.92435997040323e-33	3.31169e-32
UBE2D4	624.131210273909	0.584412	0.0486423889553094	12.014468824735	2.98280112170916e-33	3.37469e-32
C13orf37	366.539350801762	0.72743	0.0605531672151976	12.0130818965044	3.03326311232827e-33	3.42981e-32
FAM119B	454.964067539678	1.76215	0.146689485928496	12.0128101765591	3.04324824808136e-33	3.43913e-32
ABCA2	5515.79587821025	-1.19	0.099064293616387	-12.012374885744	3.05931235271593e-33	3.45531e-32
RCBTB1	1171.15327859714	-0.653582	0.054420735180327	-12.0097934747815	3.1563230288441e-33	3.56283e-32
MAGI3	481.308070044118	-0.79495	0.0662117286025258	-12.0061822885064	3.2971799122085e-33	3.7197e-32
SEC1	12.7014732685518	-1.20817	0.100652075008356	-12.0034107004782	3.40950683095836e-33	3.84203e-32
CHPF2	1179.70100271269	0.751432	0.0626496635294917	11.9941977883999	3.81091413394521e-33	4.2919e-32
TLN2	1502.10367108842	-0.826591	0.0689209572252337	-11.9933257462164	3.8512581505483e-33	4.33486e-32
MCTP2	26.1624520020795	2.67465	0.223025244379029	11.9925888840778	3.88567867075635e-33	4.37111e-32
GDAP1	847.818061259015	-0.752315	0.062742386439505	-11.9905361533033	3.98318594268987e-33	4.47825e-32
SP6	38.2873771832993	1.51886	0.126685267113613	11.9892677272773	4.04464853899577e-33	4.54476e-32
SAMD11	120.541663462193	-2.15067	0.179393709039561	-11.9885700035771	4.07885791404877e-33	4.58059e-32
DCTD	1222.09615468184	0.788044	0.0657369897157856	11.9878267831401	4.11561411881014e-33	4.6166e-32
PDZD11	1087.09906698332	0.581632	0.048528095370816	11.9854749151412	4.23410786865922e-33	4.74682e-32
GTF3A	1858.83604756301	0.656163	0.0547525470372519	11.9841584813122	4.3019062151392e-33	4.81969e-32
PCOLCE2	163.041901539015	1.88259	0.157090237398196	11.9841182843976	4.30399329376143e-33	4.81969e-32
CLDN23	30.6988441150374	1.5915	0.132803284124539	11.9839021731421	4.31523133407509e-33	4.82953e-32
ZHX3	3172.65858353843	-0.708226	0.0590995559894718	-11.983609379821	4.33050343450913e-33	4.84388e-32
TDH	18.4438207047688	-1.92175	0.160372957301773	-11.9829749965727	4.36377726639593e-33	4.87833e-32
SLC23A2	2682.27998873495	-0.63617	0.0530938829804613	-11.9819843648764	4.41624510765553e-33	4.93418e-32
ALCAM	3378.13951124793	-1.02945	0.0859369246245714	-11.979191209327	4.56757969040601e-33	5.0993e-32
MTHFS	218.591040512904	0.85441	0.0713482046063575	11.9752067558297	4.79241392040867e-33	5.34538e-32
TARP	6.36587198064433	-2.12099	0.177127880565931	-11.9743371614317	4.84292592824435e-33	5.39867e-32
CTSL1	2461.30609702996	0.850009	0.070990164335197	11.9736198859351	4.88498788315795e-33	5.44248e-32
PLXDC1	506.212617359562	1.09707	0.0916379068591308	11.9718391984654	4.99098465995383e-33	5.5543e-32
BDKRB2	108.902837319267	2.09057	0.17471229559118	11.9657805654982	5.36902974902939e-33	5.96828e-32
INPP5A	502.897049297532	-0.717719	0.0599842943672032	-11.9651096687006	5.41260289312587e-33	6.01333e-32
[truncated: 4,260 more rows]

## Sheet: DAVID_analysis
Category	Term	Count	%	PValue	Genes	List Total	Pop Hits	Pop Total	Fold Enrichment	Bonferroni	Benjamini	FDR
[truncated: 1,748 more rows]

[truncated: 1 more sheets: DAVID_analysis_UP_DOWN]
