# Supplementary material for: Transmembrane Protein TMEM230, a Target of Glioblastoma Therapy
Source: Front Cell Neurosci. 2021 Nov 17;15:703431. doi: 10.3389/fncel.2021.703431 (PMC8636015; doi:10.3389/fncel.2021.703431)
Supplement: Supplementary Table 9 — All enriched pathways identified different between high or low TMEM230 expression in low grade (G2) astrocytoma of patients from DEG. [file Table_9.XLSX]

## Sheet: all_genes
gene_name	baseMean	log2FoldChange	lfcSE	stat	pvalue	padj
A1BG	124.6040793529	-0.266419470795244	0.239936613148019	-1.11037439138514	0.266837728647964	0.482534359533907
A1CF	0.0153452056080372	0	5.23039083411357	0	1	NA
A2BP1	304.869868655733	-0.0863053964342789	0.456651779278978	-0.188996080493871	0.850095888745031	0.929001010833199
A2LD1	52.1615548871413	0.679928392059551	0.25139267568063	2.70464678502939	0.00683770527174249	0.044711133162354
A2M	17106.9830579143	0.501353508310902	0.204822564888312	2.44774548441127	0.0143753161331164	0.0744733318080375
A2ML1	190.208775772985	0.252063227619312	0.41461022279251	0.607952273635704	0.543219128230479	0.730767289881086
A4GALT	123.008156731446	0.568634595794537	0.238265273449269	2.38656094345033	0.0170067883439039	0.0835281786995354
A4GNT	0.540370601570424	-0.660223632016135	0.686869643365785	-0.961206596321421	0.336448300380709	0.55125406263744
AAA1	0.137202385373614	0.00518508418447741	1.9436256784985	0.00266773805359632	0.997871455519516	NA
AAAS	730.431499379473	-0.296029413041726	0.0987007527254712	-2.99926195968444	0.00270634507574429	0.0240842902296333
AACS	422.595913050681	-0.339388889087718	0.156367047531224	-2.17046298722209	0.0299717896324734	0.119501712011338
AACSL	0.642180143804204	-1.28887882744467	0.761009893149082	-1.69364267015144	0.0903332045435975	0.242978827746004
AADAC	0.0727433457411728	0.415701584730829	3.32366684371616	0.125073181000908	0.900465615008556	NA
AADACL2	0	NA	NA	NA	NA	NA
AADACL3	0.00504354394914944	0.145958432454859	5.23039083411357	0.0279058366925261	0.977737253250267	NA
AADACL4	0	NA	NA	NA	NA	NA
AADAT	257.077496627592	-0.306668386957254	0.128903324238556	-2.37905724129904	0.0173569804345058	0.0844233762978855
AAGAB	682.683344224754	0.237984627364529	0.0866752355864422	2.74570499583106	0.0060381031382443	0.0412057573555632
AAK1	1178.44349111755	0.0709228695941294	0.124305666524978	0.570552184601158	0.56830323859718	0.749810655318818
AAMP	2649.3659973896	0.00277971854780062	0.0660751878380967	0.0420690222570647	0.966443674956912	0.984778493348333
AANAT	3.13267159585867	-0.514558069963117	0.37674733434791	-1.36579087109862	0.172004612516397	0.367207282710419
AARS	6089.57197002715	0.0281083818172459	0.0827088514818072	0.339847323637769	0.733971507559993	0.862949071031242
AARS2	472.526494514664	-0.073253812097585	0.0780638729941826	-0.938383009808441	0.348047614119356	0.562367885442921
AARSD1	587.635791584573	-0.0105517840165802	0.100129707816501	-0.105381152573795	0.916073370851839	0.961568320788333
AASDH	333.02872929878	0.168666698189726	0.116426538950434	1.44869631709599	0.147422409437608	0.333075733949876
AASDHPPT	1523.37810341712	-0.0581715024588281	0.0945363701617688	-0.615334631097917	0.538333751528233	0.726423346839313
AASS	1387.02354446555	-0.292705676194097	0.161704241076152	-1.81012986577299	0.0702756504983015	0.206587665074458
AATF	1291.37374949531	-0.152288398998506	0.102574013411477	-1.4846684255943	0.137631679707732	0.317578963750087
AATK	1514.37292623853	-0.855170588452614	0.28663677217971	-2.98346434042474	0.00285005244517419	0.0248422894178973
ABAT	9100.74980470943	0.12296258804083	0.175150759589458	0.702038565685048	0.482655112942409	0.682867524745671
ABCA1	2779.39532946244	0.164464157735929	0.200555375021577	0.820043629936295	0.412191235380225	0.621240700243668
ABCA10	5.5556253629242	-0.406449049809792	0.368038785888302	-1.10436471750873	0.269434959463201	0.485800193141092
ABCA11P	121.562857623358	-0.287530196919012	0.141593691085106	-2.03067096221251	0.0422883838818535	0.149016209869389
ABCA12	8.52342853223447	0.162598988508153	0.475902758987724	0.341664311537112	0.732603532768362	0.862038785907649
ABCA13	28.6184805823761	1.60251298965618	0.463576782891366	3.45684479637047	0.000546539525747361	0.00812220971238764
ABCA17P	49.2881652641036	-0.0266933643653567	0.243638390176134	-0.109561405105571	0.91275722059546	0.960553680089752
ABCA2	7326.38373056025	-0.458325304470367	0.241295501723322	-1.89943575904659	0.0575072055929686	0.182158469522303
ABCA3	4433.8734373714	-0.125709831497495	0.118261271828293	-1.06298393002247	0.287789239018873	0.505324294115552
ABCA4	6.24621611175066	0.020421882793639	0.338847049130568	0.0602687343627119	0.95194160302798	0.977825540137617
ABCA5	166.780813486884	0.264083833756891	0.374533613655663	0.705100487988999	0.480747702880831	0.681551970451206
ABCA6	52.8867593253744	-0.912256938637677	0.472679564300819	-1.92996906897609	0.0536106703723606	0.174137838626407
ABCA7	199.795246289568	-0.0903182036875491	0.236487254547586	-0.381915735206674	0.702523868404928	0.843446144340279
ABCA8	615.343536445656	-0.170445245537485	0.301009241635623	-0.566245888702022	0.571226639134667	0.751906699723269
ABCA9	59.0742512746499	-0.285315594905646	0.299054977494225	-0.954057335197357	0.340054620849666	0.555280018811398
ABCB1	671.525240633722	-0.0796021277225225	0.19991369631273	-0.39818246168586	0.690495692963899	0.83626137163208
ABCB10	283.683740260047	-0.164865958250508	0.0851827490862667	-1.93543833721009	0.0529365286475359	0.172696781230042
ABCB11	1.57388821834738	1.90396049720875	1.01848215000267	1.86940978514328	0.0615658242451933	0.190314982296212
ABCB4	61.5163942256018	0.130435906896346	0.264105775080295	0.493877526368709	0.621392677083573	0.787836361793472
ABCB5	0.218678435790722	0.26617563927161	3.51375349917281	0.0757525077767328	0.939616000801851	NA
ABCB6	849.932937988617	-0.201110855222696	0.110830372528297	-1.81458250689673	0.0695880927856903	0.205473412885432
ABCB7	421.531491753068	0.110865911141218	0.0805140426879092	1.37697608317793	0.168519642385654	0.362565232038625
ABCB8	850.465791428649	0.026563114674294	0.122293898069873	0.217207195890648	0.828046877043237	0.916698820599119
ABCB9	207.881230049435	0.051104903659321	0.203994246407046	0.250521299298546	0.802184235284701	0.903374787857977
ABCC1	541.837893118184	0.540060972671308	0.173602169282356	3.11091142987345	0.00186510872108869	0.0188100869448215
ABCC10	432.022683957787	-0.109432581232278	0.103804280084592	-1.05422031869109	0.291782059533183	0.50979250824711
ABCC11	16.1295260467831	0.331098366458248	0.243290353257456	1.36091859798433	0.173539415490909	0.369317790603793
ABCC12	4.75998415034508	-0.959092380124781	0.705244932270781	-1.35994225018626	0.173848199516178	0.369694692963566
ABCC13	0.580009082294484	0.571603204460889	0.878972355866576	0.650308511576962	0.515492960170766	0.708503161049116
ABCC2	7.10195167833461	-0.829461826579132	0.304916425104374	-2.72029237616571	0.00652242174626238	0.043289428305287
ABCC3	405.226249006782	2.33139982300334	0.568376308026668	4.10185961321587	4.09842920832428e-05	0.00139844315036219
ABCC4	423.494808404647	0.327897842772976	0.161427818366958	2.03123505037774	0.0422311564024313	0.148931291317615
ABCC5	1142.74562519338	-0.507115734272612	0.148730948252255	-3.40961810727193	0.000650539031698692	0.00911058634579896
ABCC6	50.3415122723634	0.184864050764321	0.246856293797776	0.748873151744556	0.453933663856265	0.658985153277113
ABCC6P1	10.5876930817695	0.163093969940444	0.34429350121658	0.473706211020952	0.635709423624137	0.797719948053679
ABCC6P2	26.1494362391269	0.365653397037681	0.242068959600039	1.51053401329041	0.130907217125182	0.307524063734062
ABCC8	343.816532393407	-0.559049131365076	0.332438902897692	-1.68165977715648	0.0926348319188852	0.247328811813718
ABCC9	424.447583320584	0.559944508464176	0.292420092739361	1.91486331605559	0.0555099371919419	0.177992098891851
ABCD1	320.695747900658	0.0082401950141848	0.152366870756673	0.0540812774670962	0.956870408831718	0.981200310030629
ABCD2	162.67303860839	0.992636258315997	0.364153660134293	2.72587197929009	0.00641318673545373	0.0428069502141533
ABCD3	1723.4157796224	-0.0416926034836025	0.093792146629845	-0.444521263045021	0.656665759366071	0.812148637850599
ABCD4	892.117803661501	-0.0326899292284539	0.122798954186831	-0.266206902533699	0.790079867322615	0.896184707890952
ABCE1	1245.27959420453	-0.0198436577671646	0.107217751543215	-0.185078100235728	0.853167778336273	0.930562539673917
ABCF1	1847.05829978427	-0.0854267570762561	0.0949669429687462	-0.899542034372637	0.368364016714758	0.58186241642347
ABCF2	1580.43326005953	0.175948919957014	0.0789001267791326	2.23002075078475	0.0257460653092728	0.107993056615032
ABCF3	1220.07364729601	0.0368954198599079	0.0948852836351282	0.388842383628061	0.697392745637039	0.840188593401425
ABCG1	736.344352082124	-0.0360853153903135	0.17482819715307	-0.206404435771417	0.836475006189344	0.921886097162098
ABCG2	1214.97995353707	-0.0519931729781447	0.205538141967429	-0.252961189978957	0.800298203903504	0.902367839390069
ABCG4	48.1060702042267	-0.374163834883685	0.37744953355131	-0.991294998733446	0.321541554384733	0.538407694473067
ABCG5	1.96926118515861	-0.0609426617205462	0.372091666497535	-0.163784000577584	0.869901187276747	0.9389414344058
ABCG8	0.309105062123625	-0.101602135950614	1.38443195225175	-0.0733890429106036	0.9414965365743	0.972563954094352
ABHD1	27.2088252021695	0.494798960421583	0.244227714480226	2.02597383951544	0.0427674655295181	0.15020401663121
ABHD10	826.770391168722	0.183409804011135	0.093102096786488	1.96998575050088	0.0488400036839471	0.163667712680719
ABHD11	315.269306025158	0.340609119335276	0.154103298998057	2.21026494273539	0.0270867801517932	0.111740675059677
ABHD12	2118.72016303007	0.144287114251842	0.115664895954492	1.24745812513946	0.212229565280771	0.418776697342129
ABHD12B	14.292025186652	0.862622065143323	0.442682002161654	1.94862691713479	0.0513399952236203	0.169238459048788
ABHD13	346.438553807158	0.0724754730903736	0.101872905786345	0.711430311435058	0.476817621153964	0.678118828186538
ABHD14A	557.627363934299	0.11098069936	0.141060525032821	0.786759437724894	0.431422702399697	0.639231285867739
ABHD14B	582.853058084133	0.670496985313525	0.149565693450205	4.482959760667	7.36148148059121e-06	0.000432595294065331
ABHD15	215.109599929771	0.437631190040002	0.126517655277634	3.4590523281486	0.000542079577908948	0.00809943817697361
ABHD2	4618.57556507878	0.163334525739107	0.222117841480589	0.735350769890232	0.462125895714846	0.665434645799516
ABHD3	344.216884399744	0.314798394758257	0.153364450574139	2.05261645433326	0.0401097904472043	0.143934195135029
ABHD4	1791.52957041908	0.365792721355179	0.118101477844406	3.09727471689302	0.00195308784605925	0.0194572995278877
ABHD5	717.754486438561	0.0107199555474205	0.092799775576366	0.115517041726022	0.908035313554683	0.958739416848119
ABHD6	977.40673197762	-0.0272431328711577	0.151894744709534	-0.179355335322853	0.857658699891916	0.932990351228941
ABHD8	623.633163760085	-0.125850703398371	0.181885860194013	-0.691921314081971	0.488986744685069	0.688510651083709
ABI1	2304.17713927621	-0.0169053374186462	0.13195451859059	-0.128114880787809	0.898058059927692	0.954813342495715
ABI2	4439.71425760554	-0.024415246185653	0.10800464979638	-0.226057361712507	0.821156806617729	0.913356159604646
ABI3	428.640265642006	0.764248875313794	0.240436718941618	3.17858636017807	0.0014799512352837	0.0161190085480747
ABI3BP	804.060739330792	1.05022742769742	0.341631720300407	3.0741508041874	0.00211102693059018	0.0204749116860154
ABL1	3206.39259386938	-0.324142772054184	0.10203066619776	-3.17691517789287	0.00148850564016579	0.0161729960250522
ABL2	1020.31603603129	-0.117626885318662	0.0940152756269033	-1.25114652416125	0.2108810242225	0.417214498577291
ABLIM1	6130.42424297194	0.326180090215159	0.155850996520205	2.09289704588365	0.0363583460202924	0.135137614331727
ABLIM2	239.594044380925	-0.24801915718726	0.261389122350183	-0.948850338366372	0.342696735509781	0.557680787143609
ABLIM3	1465.82876161259	-0.0456794578230154	0.240469964200542	-0.189959099361451	0.849341180883751	0.928553812904403
ABO	3.2740387450075	-0.638114292142322	0.447019826424101	-1.42748543671288	0.153440019974391	0.341776098003159
ABP1	0.872399855231772	-0.708273048283024	0.807082607733074	-0.877571938109798	0.380176063484454	0.592477353060308
ABR	7013.41019681585	0.228603355643061	0.130635475562594	1.74993319891522	0.0801298412383849	0.224648394940542
ABRA	0.299359767341934	0.662277655700606	1.15799751976777	0.571916298951506	0.567378681337183	0.749199841959555
ABT1	411.987659833205	0.0405693062630616	0.0817562107935531	0.496222927521743	0.619737136544221	0.786569253905858
ABTB1	440.808457976498	0.0795877828185372	0.191088168705764	0.416497700289784	0.677045849835038	0.826476294842518
ABTB2	255.259084911392	-0.247273696464712	0.231534018228889	-1.06797998132725	0.285529541980532	0.502928026632767
ACAA1	1714.20720372528	0.18202776479249	0.120601892721224	1.50932759582185	0.131215085914888	0.307977862919768
ACAA2	703.690586183485	0.947376936500429	0.200390602475953	4.72765152055528	2.27131561139794e-06	0.000199233157678818
ACACA	2265.38726486648	-0.0410356049574027	0.113429917633967	-0.361770561183186	0.717523492938417	0.853171159824017
ACACB	420.838041553141	0.685492590202341	0.259134908154041	2.64531164514067	0.00816157107908076	0.050555071010689
ACAD10	473.368349456786	0.0681522838073193	0.0942405743753513	0.72317347659486	0.469573311849896	0.671866375831323
ACAD11	737.661350156046	0.072923101999242	0.153709141391519	0.474422674793924	0.635198526745056	0.797412727445518
ACAD8	960.990478537603	-0.26369557665719	0.0793992393800939	-3.32113479569806	0.000896522268585006	0.0114905655265115
ACAD9	768.566053474527	0.234900250329936	0.0686353002425062	3.42244077755868	0.000620616158941542	0.00884304260704185
ACADL	29.278177929799	1.07167843162841	0.425694042416439	2.51748515329241	0.0118195950822113	0.0651164089363735
ACADM	1221.33439278064	0.311373141250081	0.0921308009320864	3.37968560025445	0.0007256879120755	0.00989334346849252
ACADS	268.007257634361	0.521229043288141	0.223602394603834	2.33105304713585	0.0197505626826571	0.0915582929001132
ACADSB	664.483029480302	0.0854042038175798	0.130931679787149	0.652280670013692	0.51422012754833	0.707529752358564
ACADVL	4148.45464366516	0.289623624529349	0.128993197497794	2.24526277468471	0.0247512682780058	0.105368680439181
ACAN	150.437908866736	1.38239330186825	0.552390746744101	2.50256419032423	0.0123297264624446	0.0671255016880175
ACAP1	25.4173401050641	0.723617655922153	0.348088507322522	2.07883236791752	0.0376327607316002	0.138121715788831
ACAP2	1076.02303344689	-0.0773368233937501	0.121980563839067	-0.634009394281724	0.526074691291053	0.716928768381638
ACAP3	3173.69090131055	-0.965052768137655	0.201740039467379	-4.78364518360126	1.72144448418621e-06	0.00016915308587233
ACAT1	1577.16559697321	0.111917216894507	0.107232583955618	1.04368665536241	0.296630385879696	0.514580367138101
ACAT2	670.949481782129	-0.143979571597005	0.167300575848438	-0.860604160307495	0.389456093817845	0.600875116176104
ACBD3	878.231541292926	0.15440666672777	0.0897168458072301	1.72104430710299	0.0852427841647321	0.233628371414451
ACBD4	338.154579620057	0.166332105376886	0.162589033938644	1.02302167217289	0.306297599049248	0.523638174064943
ACBD5	2112.48701383753	0.0435591975277697	0.124151372097052	0.35085554667667	0.725696722585303	0.858010287693399
ACBD6	480.692294404133	-0.149389313597001	0.0844372367796474	-1.76923498795747	0.0768546676148606	0.219052248066322
ACBD7	905.39226614479	0.829907991624154	0.345802843884005	2.39994553631414	0.0163975113859528	0.0816218370518654
ACCN1	76.0639681638986	-0.333543210159417	0.491190786450761	-0.679050217064389	0.497106044145344	0.694633277886816
ACCN2	2402.39480921789	-0.812701287469286	0.190260298923745	-4.27152323457146	1.94142295067468e-05	0.000837186270960003
ACCN3	144.242580202512	-1.33734269364542	0.254764249211024	-5.24933422875076	1.52649895590826e-07	3.15511542817728e-05
ACCN4	1344.88078230918	-0.90436822985675	0.334268452996391	-2.70551474944754	0.00681986196281542	0.0446371958479063
ACCN5	0	NA	NA	NA	NA	NA
ACCS	104.516956934276	0.251670513218299	0.296452369288189	0.848940805643026	0.39591423134903	0.606504646145083
ACCSL	0.0249876789251004	-0.185375190255901	5.23039083411357	-0.0354419384966129	0.971727343619214	NA
ACD	543.076843762817	-0.146232043768109	0.114703725109296	-1.27486743459091	0.20235616728449	0.406211719997757
ACE	221.878872193097	0.115596026056512	0.320704775703853	0.360443731474884	0.71851532826866	0.853729525104205
ACE2	3.49238947640469	-0.0333550555883357	0.428306892731705	-0.0778765323518376	0.937926267175865	0.971456599055004
ACER1	0.0695499571099083	-0.185410038722954	2.4689302364057	-0.0750973178540987	0.940137281842977	NA
ACER2	22.4880229278292	0.111187911188877	0.233888593834959	0.475388343509113	0.634510201252015	0.796993743986709
ACER3	588.656736516075	-0.255578054152284	0.129356238728454	-1.97576905964927	0.0481809392103997	0.162458212803564
ACHE	365.366438207778	0.482207317056322	0.271460513854803	1.77634422851731	0.0756761974965118	0.216743019321145
ACIN1	2959.83711849505	-0.25029289293281	0.0878719982771159	-2.84838057447469	0.00439423421548128	0.0335529170542609
ACLY	3707.02340341652	-0.0379018672988797	0.115154713235331	-0.329138653851043	0.742050888860519	0.868403571635704
ACMSD	0.756655919006708	3.34133725612931	1.12831990186894	2.96133858012674	0.00306305008212354	0.0260794349321712
ACN9	209.89911714818	0.399917839136858	0.169772934874923	2.35560420411822	0.0184926095602497	0.0879487186226953
ACO1	1036.60703927577	0.0935853764685225	0.0904315686709278	1.03487507563947	0.300727255938515	0.518523110201015
ACO2	5998.02354776502	0.164942889842791	0.130272640291063	1.26613607795363	0.205464367964172	0.410861960334351
ACOT1	363.630926483021	0.348484645318059	0.187226298536169	1.86130179383287	0.0627015699971445	0.19260328522184
ACOT11	85.0571389727632	0.672713078916586	0.306816508824631	2.1925582866895	0.0283392192883379	0.115319267083705
ACOT12	1.62979858289022	0.0520986153248042	1.17994508817276	0.0441534236186219	0.96478210838535	0.984221591992183
ACOT13	684.455371704113	0.496532817470356	0.0900094359253192	5.51645294035982	3.45910059386304e-08	9.87326140934052e-06
ACOT2	214.782677873188	0.0635418541145575	0.180539845160983	0.351954739176267	0.724872206283188	0.857317285805333
ACOT4	19.9157740247783	0.899429199556804	0.307481793424243	2.92514619984615	0.00344294428672935	0.0283173081611855
ACOT6	2.81610825383303	1.18961367651937	0.350100452848181	3.3979209876522	0.000679000276557983	0.00942840384020513
ACOT7	942.768087937761	-0.313683759704703	0.194972400366177	-1.60886237803697	0.107646437538402	0.272058782827203
ACOT8	512.891733734948	0.0351188086164635	0.0964366529151904	0.364164532414332	0.715735150265329	0.852115298733524
ACOT9	331.545461726541	0.373942237783783	0.160283057677525	2.33301163081204	0.0196475348863814	0.0913869561114617
ACOX1	2166.59926107542	0.0524959987641263	0.0981753501279112	0.534716695135083	0.592845775146302	0.767450357744561
ACOX2	164.065353109117	0.0595859699498682	0.242254517847386	0.245964329083868	0.805709845613222	0.905320770834281
ACOX3	427.359436416273	-0.0838801341507868	0.0896284183002138	-0.935865384456826	0.349342501687265	0.563397028281651
ACOXL	1.26901968685859	-0.786573269765092	0.444747040101089	-1.76858573265897	0.0769630334391068	0.219187403753883
ACP1	1133.85713638505	0.0262486544650781	0.0703532984618137	0.373097708834864	0.709075723854041	0.848061168363377
ACP2	1071.942402155	0.132558439344384	0.0966531832420371	1.37148549999055	0.170223660580766	0.364797194872717
ACP5	75.121807592637	-0.618954785958882	0.416847813990196	-1.48484594421656	0.137584638112397	0.317551914072279
ACP6	198.280490719448	0.196921291825996	0.160168738979452	1.22946146096123	0.2188988388131	0.427097649711242
ACPL2	1203.98393678918	0.500412260864388	0.20795506257942	2.40634805739954	0.0161129051345391	0.0806407626299144
ACPP	14.1493547672757	1.47536037406993	0.398972021294997	3.69790435249357	0.000217386765386704	0.00441201897876265
ACPT	0.0954443191320454	-0.255787355777845	2.16520293467115	-0.118135511310257	0.90596028649361	NA
ACR	2.98151151716957	-0.372259695416019	0.30885733718337	-1.20528040166003	0.228095072796723	0.438252548245611
ACRBP	26.1061047738255	0.32816340125687	0.230098281561388	1.4261879707664	0.153814090967165	0.342227788142979
ACRC	49.3213338956488	-0.492701222297067	0.19844300766045	-2.48283488597449	0.0130341487711028	0.0696738519086836
ACRV1	7.27596053804254	-0.13777995092165	0.46344343322523	-0.29729615535342	0.766240416612252	0.882884961334719
ACSBG1	1153.90005028583	0.40858848894008	0.270285301577262	1.51169333498989	0.130611894966917	0.307031277705659
ACSBG2	3.8716963021601	0.315945906059095	0.485481144202339	0.650789242449786	0.515182545416991	0.708257838814093
ACSF2	387.952796785125	0.698582354709332	0.195540717827881	3.57256719965731	0.000353498730841181	0.00614759591681443
ACSF3	406.884235236015	-0.184289806513369	0.0980407318819991	-1.87972695608983	0.0601452998460289	0.18731083855755
ACSL1	1081.45168894477	0.325771277743329	0.236258249309734	1.37887789609515	0.167932404340738	0.36172703207836
ACSL3	2567.36694664434	0.101163974558583	0.174507419415514	0.579711595629669	0.562109122400585	0.745251510654525
ACSL4	952.169676182913	-0.0441200672761888	0.13644837443294	-0.323346228634423	0.746433047310355	0.871202567023517
ACSL5	226.34375160898	0.149871482106144	0.171364086263274	0.874579297063971	0.381802856508962	0.59380548051757
ACSL6	557.854299172851	-0.0535555625569568	0.262963538013784	-0.203661553086305	0.838617988634775	0.923179506415413
ACSM1	0.805971455796605	-0.316369941333791	0.702941853810369	-0.450065591654381	0.652663146154021	0.809169104670546
ACSM2A	0.261941472903076	-0.117973920311597	2.49198440796354	-0.0473413557222075	0.962241167915647	0.983479752438217
ACSM2B	0.0782365573157497	0.506611561823063	5.23039083411357	0.0968592171963229	0.922838196430962	NA
ACSM3	1.98159422511259	0.934367683458048	0.404744731810516	2.30853575111011	0.0209693567559244	0.0949820767064061
ACSM4	0.00492739118930054	0	5.23039083411357	0	1	NA
ACSM5	296.756341936103	0.168282342816703	0.298630043120433	0.563514444354942	0.573084627110062	0.753523507232405
ACSS1	1720.91027530807	-0.121763440988873	0.193383924255805	-0.629646137637616	0.52892613013133	0.718907760545849
ACSS2	616.481787119946	-0.020145164444159	0.0914050010133257	-0.220394554136289	0.825563886320009	0.91540834464028
ACSS3	313.780657698724	0.837112406532304	0.348959357193267	2.39888224595932	0.0164452022022356	0.0817577069396185
ACTA1	7.57997191568469	-0.388879031526965	0.324090860480746	-1.19990743012658	0.230175293997316	0.440789364926489
ACTA2	726.151000833327	-0.0478764480500103	0.309602643054949	-0.154638369936374	0.877106418993794	0.942451054288084
ACTB	85920.0331865164	0.395232060144274	0.104234433375143	3.79176100782187	0.000149582828164189	0.00346623507222738
ACTBL2	0	NA	NA	NA	NA	NA
ACTC1	49.5464728343125	0.903987630453702	0.583217317904021	1.55000135061571	0.121141191832375	0.292711759141328
ACTG1	47661.6564346723	0.236494911056911	0.0995334380051703	2.37603478586388	0.0174998129513546	0.0848598591388964
ACTG2	27.3055081849428	0.613374286293901	0.532518472898246	1.1518366357426	0.249388210184274	0.463178970825617
ACTL6A	581.000699832196	0.289929285431589	0.115409686034779	2.51217463102895	0.0119989695599025	0.0659429922451609
ACTL6B	260.946726036237	-0.544589922510779	0.384314634594763	-1.41704185448211	0.156470690849552	0.346177148647731
ACTL7A	0	NA	NA	NA	NA	NA
ACTL7B	0.0293751244136099	0	5.23039083411357	0	1	NA
ACTL8	1.04663122704722	-0.640031393399611	0.73050984813417	-0.876143415498567	0.38095207315738	0.593141230213078
ACTL9	0	NA	NA	NA	NA	NA
ACTN1	2646.6841417788	1.34379949693184	0.312581812238503	4.29903290696422	1.71545003614994e-05	0.000773113347119005
ACTN2	774.317926707491	-0.658275858978597	0.203470061012613	-3.2352467763687	0.00121537637346022	0.0141822828991316
ACTN3	0.647234466665845	-0.199596579670219	0.681116078303918	-0.293043412170278	0.769488969358738	0.88420704448596
ACTN4	4796.42144687105	0.0914817496340704	0.120602196808332	0.758541320598483	0.448126986090937	0.654288686577397
ACTR10	1013.39110765803	0.145380515495629	0.0859538100333112	1.69137953790864	0.0907643377937935	0.243891859265988
ACTR1A	3661.98523520626	0.053969214288941	0.101385700997078	0.532315837028109	0.594507265313024	0.768397503364146
ACTR1B	1389.37721177343	0.0239715257543199	0.080143552065521	0.299107353448998	0.764858135744909	0.881928759023081
ACTR2	4719.30158040631	0.220372064351983	0.0929524061946008	2.37080537636242	0.0177493746391934	0.0855960816580764
ACTR3	2482.46522673854	0.355141997385735	0.102298238407266	3.47163355806632	0.000517301936577516	0.00788315544367533
ACTR3B	359.640778145099	-0.496625303471648	0.170349310080291	-2.91533498572769	0.00355306945234419	0.0288839488662085
ACTR3C	6.63415337127163	0.157584157408776	0.312485908066913	0.504292044347269	0.614056167217376	0.782951003254829
ACTR5	192.727542074696	0.00705453707481676	0.09303329888145	0.0758280869283823	0.939555870311741	0.971634595921436
ACTR6	666.702113415649	-0.130757376933828	0.0732603305948354	-1.78483192571131	0.07428858320098	0.214387870519025
ACTR8	537.704411050654	-0.0273009820135555	0.0857185161600232	-0.318495737403909	0.75010892750894	0.872982896541696
ACTRT1	0.0105610057533173	0.145959087611461	5.23039083411357	0.0279059619521143	0.977737153346483	NA
ACTRT2	0	NA	NA	NA	NA	NA
ACVR1	671.307975378335	0.366060150196317	0.124297022574761	2.94504359487889	0.00322909161528437	0.0271379606619314
ACVR1B	1043.55674872331	-0.0959834926013301	0.11150160699353	-0.860826092012282	0.389333832209324	0.600789579575051
ACVR1C	75.1716006309914	0.0941028847049299	0.408749925008659	0.230221166897918	0.817919914764485	0.911639798109656
ACVR2A	320.785177987404	-0.270306093418708	0.106118193866965	-2.54721724492953	0.0108585810881392	0.0618103846555618
ACVR2B	633.35522387329	-0.559590657740286	0.16320619765652	-3.42873411534277	0.000606403279680354	0.00872377900874725
ACVRL1	324.796867841859	-0.0417120912328704	0.201756174960925	-0.206745053731064	0.836208969673646	0.921795531300032
ACY1	413.787770126767	0.136316794988409	0.130047865555436	1.04820478526271	0.294544266316824	0.512580566815942
ACY3	184.776040569868	0.25805861006108	0.396639156120812	0.650613047347444	0.5152963058274	0.708360077317354
ACYP1	95.4786761544602	-0.132984518569917	0.19533521815772	-0.680801546306625	0.495997071498958	0.694082235665872
ACYP2	547.770319038018	0.196013358242297	0.13042722282018	1.50285618296527	0.132876134242913	0.310382056433145
ADA	105.426572234425	-0.888371582772174	0.233249254307807	-3.80867919774713	0.000139711077794996	0.0033011953492474
ADAD1	0	NA	NA	NA	NA	NA
ADAD2	36.8562751714844	-0.971777080048882	0.531438549878102	-1.82857845045637	0.0674627833906682	0.201141740836769
ADAL	239.392202072928	0.165464179063027	0.0934320669778556	1.77095706447599	0.0765678418157391	0.218511812653646
ADAM10	1070.66497420492	-0.00220219181530837	0.165042518737884	-0.0133431786678306	0.989353999652898	0.995276286531939
ADAM11	241.178268657762	-0.639054021872505	0.35590807630905	-1.79555920309487	0.0725646491378063	0.210953656072111
ADAM12	169.418037120708	-1.02685196080973	0.460175844478036	-2.2314338597552	0.0256524040805561	0.107826444641552
ADAM15	1279.44380035637	-0.057829625791293	0.121595964252659	-0.475588364685616	0.634367666292138	0.79698172118111
ADAM17	815.300046911452	0.171841159453573	0.14556203044918	1.18053560343518	0.237787258683374	0.449831072894134
ADAM18	0	NA	NA	NA	NA	NA
ADAM19	264.532422412069	-0.314428295716155	0.312208988644829	-1.0071084022307	0.313882683915461	0.531181791210798
ADAM2	0	NA	NA	NA	NA	NA
ADAM20	1.86076710916541	-0.386975883354586	0.304776113855892	-1.26970541903281	0.204189581781384	0.409092160828553
ADAM21	7.47573333037976	0.197016106941987	0.216708361083902	0.909130159799001	0.363281424248804	0.576622892706225
ADAM21P1	1.35469683223999	0.717367449109743	0.407339753947777	1.7611034576353	0.078220893925474	0.221367345698438
ADAM22	501.880753512494	-0.120645693969464	0.254256260953773	-0.474504319055486	0.635140318769744	0.797395323055053
ADAM23	451.579638855194	0.318789998439561	0.242672949651107	1.31366103596585	0.188960298762527	0.389040999810828
ADAM28	302.866103751354	0.164796755499897	0.241993260392782	0.68099729402552	0.495873202652258	0.694082235665872
ADAM29	3.51764183061557	-1.59300551259238	0.507589456705042	-3.13837391921651	0.00169888004396908	0.0177247776155917
ADAM30	0.0365100868978922	-0.135533559164724	5.23039083411357	-0.0259127020261563	0.979326968697464	NA
ADAM32	8.14431178142047	0.00589165194603756	0.373185433641002	0.0157874649301163	0.987403948728687	0.994315831664851
ADAM33	113.452428557093	0.117029949592285	0.410671638816416	0.284972076303038	0.775665535182628	0.887869228666193
ADAM3A	0	NA	NA	NA	NA	NA
ADAM5P	0.0248278396287009	0.266175471490422	5.23039083411357	0.0508901686188299	0.959413039665671	NA
ADAM6	333.278125892423	3.49719182428882	0.599899378599229	5.82963068315689	5.55501794358534e-09	2.85400950461576e-06
ADAM7	0	NA	NA	NA	NA	NA
ADAM8	68.0438142673586	-0.404424746600465	0.313565447375085	-1.28976183436657	0.197133362981175	0.400005882772228
ADAM9	2560.47513465963	0.201483543173294	0.177375104322827	1.1359178276033	0.255990956398457	0.470677850506856
ADAMDEC1	25.9246234233684	-0.79417064702842	0.889234600593116	-0.893094630481891	0.371806498231658	0.584323059884781
ADAMTS1	393.927653784295	0.648729194115004	0.271651349093908	2.38809487336926	0.01693596914516	0.0832993974749091
ADAMTS10	384.23254989819	-0.734556607128674	0.169467829887939	-4.33448995962479	1.46098455875916e-05	0.000689538696472628
ADAMTS12	35.4285123476647	-0.130092488599079	0.329514144433333	-0.39480092371391	0.692989813164252	0.836893406334424
ADAMTS13	254.236304452119	-0.466271955621479	0.195056723347031	-2.39044288051492	0.0168280665341856	0.0830868458038784
ADAMTS14	96.4072818103862	0.731375790655908	0.4313467234644	1.69556357072055	0.0899685616617677	0.24236923982051
ADAMTS15	101.665361524887	0.967302803904757	0.460713895166885	2.09957375727591	0.0357663532862747	0.133627792394305
ADAMTS16	26.4156933358249	-0.0179448056651832	0.51797648423698	-0.0346440547230968	0.972363571978691	0.987409179541497
ADAMTS17	72.0360211631562	-0.436131790324273	0.265091893143629	-1.64520983705817	0.0999265456076893	0.25951460761373
ADAMTS18	26.854143754298	-0.801810427375703	0.682474293990114	-1.17485806342666	0.240051505773616	0.452387695802897
ADAMTS19	28.0638429984407	-1.31990431693012	0.430554888418647	-3.06558897003329	0.00217241733433378	0.0208232454722761
ADAMTS2	27.2600615207974	0.273141633263634	0.36671527675269	0.744832982368059	0.456372693347485	0.660854708630574
ADAMTS20	42.2299118208662	-2.48760422815559	0.66767454006375	-3.72577367997	0.000194717055565724	0.00410480901897168
ADAMTS3	67.6990684410187	-0.5721885823402	0.483127639872342	-1.18434247001763	0.236277523467904	0.448652843400196
ADAMTS4	502.601221425642	-0.31072114995028	0.347213316702286	-0.894899864156721	0.3708406193905	0.583519077518374
ADAMTS5	136.224424246688	0.0221066845429303	0.239194666190744	0.0924213106211222	0.926363308461559	0.965802263033039
ADAMTS6	171.641669910374	-0.741429659316057	0.243730146542511	-3.0420104768892	0.00235003714775327	0.021998109313326
ADAMTS7	97.4373342625703	0.475999281749276	0.359290142737091	1.32483256602335	0.185226690907714	0.38414146274531
ADAMTS8	164.41594153297	-0.37930564926864	0.311613347991337	-1.21723171267742	0.223516067500186	0.432458137054911
ADAMTS9	507.198055220616	-0.138525676637485	0.27090219183379	-0.511349412493776	0.609106410836533	0.779489812659141
ADAMTSL1	109.099223695833	0.284511749008869	0.390466862918115	0.728645055517897	0.466218810427185	0.668757709724126
ADAMTSL2	498.351179270991	-0.467007699613358	0.176944440526158	-2.63929004056117	0.00830798678210221	0.0512668321642953
ADAMTSL3	116.585985995244	1.00266509070763	0.374503534687741	2.67731809672677	0.00742141387567206	0.0473065807558791
ADAMTSL4	102.263197302499	0.743723085656011	0.288805861434275	2.57516617551498	0.0100191937082871	0.0585331842957825
ADAMTSL5	7.11327151484105	0.384354402586046	0.40805621503243	0.941915325454607	0.346235993155617	0.5610033906041
ADAP1	706.569316293069	-0.649819993110125	0.286562175943615	-2.26764049013219	0.0233511276958086	0.101596897707726
ADAP2	378.673380725562	0.417664446703227	0.201404926375337	2.07375486895922	0.0381020825426159	0.139428499853748
ADAR	6955.25521589308	0.27103290558337	0.0962602368394705	2.81562683078955	0.00486821769915173	0.036054485447342
ADARB1	406.86382252015	-0.177897856606695	0.196999526045071	-0.903036977693003	0.366506269974836	0.579946827410023
ADARB2	181.723359696586	0.0729834137616442	0.391929675104506	0.186215585084706	0.852275702585501	0.93029147043174
ADAT1	208.304386921284	0.0988471322876034	0.168201779044905	0.587669957172179	0.556753844551148	0.741486271124185
ADAT2	107.706395268366	-0.266725340527759	0.172192933826039	-1.54899120771834	0.121383833668277	0.293022432141623
ADAT3	35.9552285821193	-0.422207001746616	0.277662910782548	-1.52057399584516	0.128366776601071	0.304122711046175
ADC	574.259588088762	0.0698058272848268	0.147021202929937	0.474801089187748	0.63492875659548	0.797337830664167
ADCK1	303.199560276342	-0.359754276234377	0.114630641702045	-3.13837793187508	0.00169885678440959	0.0177247776155917
ADCK2	793.311060710722	0.0471911466869238	0.118403402313467	0.398562421052628	0.690215655705867	0.836118991005934
ADCK4	904.681417136514	0.168228712531753	0.119257747903928	1.41063130478764	0.15835335607102	0.348669550073756
ADCK5	116.9169025376	-0.490265268207909	0.177477467597206	-2.76240851779895	0.0057376638318039	0.0399145124798777
ADCY1	1055.66065194094	-0.0632436906703287	0.361179306558671	-0.175103306091694	0.860998460521984	0.934142290159667
ADCY10	1.4678588365015	0.301413707034939	0.444884349024091	0.677510251138587	0.498082268200794	0.695435619752052
ADCY2	3986.2318867286	0.443889406480501	0.235753781186029	1.88285169488008	0.0597204690813481	0.186536994097759
ADCY3	921.861767606949	0.100610420946056	0.117106832485384	0.859133654380184	0.39026678171562	0.601589399056594
ADCY4	83.0017196866649	-0.340429723450608	0.244058141674616	-1.39487140693088	0.163054620885527	0.355399780941037
ADCY5	389.051423218712	-0.431497032279895	0.214717828667982	-2.00960039022711	0.0444734999290596	0.154356779719041
ADCY6	971.939842879579	-0.484390695195119	0.118629471785359	-4.08322390637925	4.44151907871724e-05	0.0014928485247382
ADCY7	888.854953641964	0.0704757266619737	0.156191171741945	0.451214533292648	0.6518349360644	0.808644071770268
ADCY8	1458.63112516575	0.180228385501154	0.276903254140281	0.650871316267916	0.515129558889427	0.708255634196181
ADCY9	587.938074338075	0.0985624072903078	0.134098088354529	0.735002329263101	0.462338075554278	0.665580279770798
ADCYAP1	34.0606530119874	-1.45515958272756	0.518611951113404	-2.80587360087535	0.00501803722240499	0.0365469199405778
ADCYAP1R1	1909.16316645976	0.468120247851465	0.343781850144148	1.36167819114122	0.1732994668322	0.36900781676455
ADD1	9791.16659418948	-0.0574163870271931	0.0690227364702252	-0.831847445688585	0.405495059263481	0.615416573962556
ADD2	961.296312128243	-0.247462694220532	0.193958708371844	-1.27585245487464	0.202007680812385	0.405991950262991
ADD3	6137.87221633902	0.300293056354182	0.183539626818655	1.63612110125343	0.101814244750165	0.262634306282809
ADH1A	0.086108849471294	-0.115032833156536	2.62535947990712	-0.0438160313042561	0.965051048223705	NA
ADH1B	20.4757337245368	-0.440047086641887	0.450567023522112	-0.976651782462928	0.328741573792507	0.544299522544709
ADH1C	0.26283407731964	0.395176478123621	1.45763711815044	0.271107584461797	0.78630828840026	0.894638213024108
ADH4	0.580387856534769	0.515401748450792	1.37989091839018	0.373509051753218	0.708769609679351	0.848010932416521
ADH5	2446.43580185968	0.416298680105992	0.0820791802858465	5.07191566309755	3.93830930002766e-07	5.95114939773927e-05
ADH6	0.135454352771884	0.225103265211775	1.60089959270741	0.14061048315409	0.888177666164451	NA
ADH7	0.350140958210716	1.20742279628977	1.2147646092843	0.993956184648104	0.32024419920316	0.537076190830843
ADHFE1	503.694247033457	0.143845197038642	0.214452406235483	0.670755808077483	0.502376103999948	0.698772207775918
ADI1	1339.52374334273	0.324473340513893	0.129531630928838	2.50497379047248	0.0122460467601615	0.0668716710723425
ADIG	3.44450869006273	2.53332610188284	0.583554005191459	4.34120249256396	1.41705053765278e-05	0.00067935817432126
ADIPOQ	0.317167674719688	0.474347406587836	1.45370978008546	0.32630131067836	0.74419639667197	0.869747539929073
ADIPOR1	1761.09356425076	0.312658447461341	0.10549672384681	2.96367921259193	0.00303984996335225	0.0259267829999179
ADIPOR2	3324.01007591982	-0.0214714020177949	0.165553430638881	-0.129694696962397	0.896807978341839	0.954112002517037
ADK	414.935818765682	0.24624805999744	0.128669080852759	1.91380911688668	0.0556445501753773	0.17816773506894
ADM	147.822590409899	0.785662215038019	0.39773946634613	1.9753187237253	0.0482319897257658	0.162538912902684
ADM2	15.7975450063656	0.437692781575508	0.485624595392341	0.901298628052172	0.367429563052613	0.580998804327479
ADNP	2299.46142432932	-0.030249875155778	0.105222640462066	-0.287484471240611	0.773741390496391	0.886656747636126
ADNP2	645.405559363896	-0.274325862080106	0.129005494382467	-2.12646649968879	0.0334644357867985	0.128088012839125
ADO	1041.32018812444	-0.166518507745082	0.10269877505023	-1.6214264256184	0.104926217217141	0.267477068046303
ADORA1	1406.55971690315	0.489857133196742	0.284164374860697	1.72385132174601	0.0847346869233393	0.232665112444812
ADORA2A	117.644830881053	-0.23939685254371	0.184658883400245	-1.29642748908441	0.194828246589358	0.396889381985286
ADORA2B	72.2836015641261	-0.0703525530850354	0.294538362296228	-0.238857011822043	0.811216460373692	0.908130136988092
ADORA3	1103.5430810251	0.646862655809593	0.236562074290785	2.7344309426982	0.006248820149958	0.0420532499762518
ADPGK	674.251141615496	0.247852998299699	0.0952388565193453	2.60243567969922	0.0092564176579181	0.0553746462315518
ADPRH	165.68167650594	0.538492462976227	0.184207825267679	2.92328766269144	0.0034635636868257	0.0284261990947055
ADPRHL1	48.3934146359317	0.0792843746243526	0.213129615116057	0.372000740400058	0.709892298089627	0.84852986600955
ADPRHL2	812.265598608774	0.239276456376414	0.109903307465253	2.17715428129462	0.0294690581595755	0.118336892323691
ADRA1A	51.9292071090918	0.54166728348746	0.344084882743488	1.57422575257765	0.115435267700556	0.284569097716446
ADRA1B	76.03809896117	-0.308185653454889	0.37670326931827	-0.818112500092237	0.413292951861359	0.622496300803899
ADRA1D	44.9243415099741	0.279347211452529	0.386639776403765	0.72249993016965	0.469987168274497	0.672125756315572
ADRA2A	132.176568062219	0.804755037586199	0.394404861618316	2.04042879766781	0.0413076360845412	0.146855261382408
ADRA2B	21.604917184829	1.0831227865299	0.36597660793867	2.95954102812879	0.00308097673858406	0.0261701103983082
ADRA2C	41.6640522618209	0.144240348791823	0.316834104101139	0.455255122238288	0.648925708330993	0.807119013385663
ADRB1	76.9509234508173	0.0149879408157216	0.297290019654998	0.0504152168751408	0.959791510493567	0.98239522178948
ADRB2	116.380464004896	-0.0213610736750756	0.237400007217362	-0.0899792461064145	0.928303707127143	0.966967344120969
ADRB3	0.699055041645866	-0.93428062264447	1.01002764052184	-0.925005004973687	0.354963304026405	0.569093271487413
ADRBK1	1954.9300022095	-0.195724062522519	0.100746181168552	-1.94274423360093	0.0520470688538497	0.170661997106113
ADRBK2	699.355602879597	0.0745072451893395	0.152352586088565	0.489044834106245	0.624809955945769	0.790540181264776
ADRM1	1568.2586079973	0.097262618104015	0.0959789410278623	1.01337457011304	0.310881281246849	0.528230860756009
ADSL	646.47870823579	-0.0682581757542787	0.097037077183731	-0.703423657588511	0.481791767517189	0.682288081053456
ADSS	703.53473567454	0.0249035299493597	0.122119504624873	0.203927538240992	0.838410124839689	0.923170097658887
ADSSL1	84.742179933665	0.64732182895466	0.216219766307934	2.99381430295676	0.00275513573884831	0.0243453812560051
AEBP1	5118.74948970595	2.04110013826084	0.421601953793743	4.84129667781234	1.28994617153997e-06	0.000143184025040936
AEBP2	525.797943444891	0.163138528084616	0.0895868802069012	1.82100914450695	0.0686054668255355	0.203562132434843
AEN	420.443879346033	0.607392372471193	0.233900085924099	2.59680269065097	0.00940959583513011	0.0559719987784683
AES	6291.49166940591	-0.226008336034179	0.155050831540905	-1.45764027053641	0.14493972348783	0.329336477125019
AFAP1	1828.14709886072	-0.543257676349225	0.168112066327146	-3.23152102176917	0.0012313326630607	0.014314668949556
AFAP1L1	224.901567016194	0.0301865663459766	0.282092191046398	0.107009578088646	0.91478138117342	0.96115149817205
AFAP1L2	809.80643085404	0.131953262211526	0.280416990515906	0.470560867117077	0.6379543585202	0.799087160414477
AFARP1	3.39556276306359	-0.36932108367998	0.317765160325564	-1.16224536164252	0.245135813611957	0.458262162229057
AFF1	1135.93576901186	0.368083060718361	0.138542223886722	2.65682945164299	0.00788793365791621	0.0494046753871993
AFF2	251.971417647903	-0.883743323887548	0.367316052033269	-2.40594800852184	0.0161305601734782	0.0806617722579211
AFF3	561.120327873799	-0.292380302397353	0.212753089823887	-1.37427053416418	0.169357710441235	0.363802454802806
AFF4	2754.47987011349	-0.0526904110898074	0.116146436776521	-0.453654994093275	0.650077164735052	0.807856777903642
AFG3L1	285.873204166408	-0.331807777737577	0.17307046744071	-1.91718311416271	0.0552146725032183	0.177393289432352
AFG3L2	1115.01174441751	0.0592864737443114	0.0889470582196957	0.666536644729454	0.505068149191078	0.700885852246463
AFM	0.0958818984388176	0	5.23039083411357	0	1	NA
AFMID	310.452985264641	-0.297822810853047	0.191934976895034	-1.55168597027482	0.120737381263268	0.291974752755814
AFP	2.49500888656854	3.82147613897785	1.11696161495334	3.42131375672878	0.000623193917369508	0.00886572232764121
AFTPH	785.422767949258	0.152187192597346	0.0710377858392423	2.14234144264778	0.032166016256665	0.124934079703265
AG2	860.757107783228	-0.45373618022456	0.290834179819135	-1.56011986110688	0.118731558909291	0.289260383729423
AGA	365.658488546249	0.757778258189021	0.147871220260919	5.12458243633833	2.9819786126159e-07	4.91944398275772e-05
AGAP1	570.317887274959	-0.221107814682183	0.1860887254501	-1.18818490560017	0.234760569188353	0.446697037682593
AGAP11	13.6283989126784	-0.0776638337105442	0.326182878679459	-0.238099050523325	0.811804271137794	0.908392308873666
AGAP2	2088.22131665816	-0.85650982220315	0.352361455275912	-2.43077047554044	0.0150667557360331	0.0768378904269275
AGAP3	2841.09219691327	-0.484267768359215	0.130342764492112	-3.71534062704739	0.000202930138286992	0.00421840526099181
AGAP4	306.653152560567	-0.495509414550671	0.20674790103301	-2.39668413596884	0.0165441785255349	0.0820908990745498
AGAP5	39.7838664682097	-0.427102633614773	0.175033819104441	-2.44011492064813	0.0146825902700829	0.0755428721707095
AGAP6	162.712208071679	-0.498537471690881	0.194934517481182	-2.55746123432966	0.0105439309420333	0.0605026482328527
AGAP7	16.8742299121177	-0.732526050631758	0.323637735608935	-2.26341359499839	0.0236102054757187	0.102229404012611
AGAP8	50.3659571483656	-0.151839818178998	0.277751307669148	-0.546675439454157	0.5846017306124	0.761829068502957
AGBL1	0.314697005094098	-0.408274360244358	1.12395128374524	-0.363249160483097	0.716418767215846	0.852564971937916
AGBL2	15.3252564146224	0.301614340456912	0.441600107895827	0.683003321475778	0.494604743724036	0.693217654064351
AGBL3	15.2849031604879	0.358744836482471	0.22029793813296	1.62845299199283	0.10342886904965	0.265125862188282
AGBL4	31.0605315272523	0.178875927317196	0.354289646339217	0.504886126832874	0.613638818661477	0.782789328502917
AGBL5	566.757051181783	0.0224908742328121	0.0900450394926581	0.249773606181226	0.80276243213046	0.903644576331298
AGER	112.685109855713	-0.421576331103737	0.26700509736929	-1.57890742632776	0.114357292374643	0.282779542282843
AGFG1	1876.332434838	0.00619870157962497	0.0815729523473581	0.0759896681589915	0.93942731804592	0.971634595921436
AGFG2	1172.01131901911	0.325100401780993	0.196681900486547	1.6529248546855	0.0983461580184097	0.257241310384196
AGGF1	1113.59210061224	0.152916114758319	0.0788274666159174	1.93988366394412	0.0523938298366322	0.171392732057908
AGK	716.60984633337	0.0421161657943421	0.0966071874832039	0.435952716268284	0.662871036153414	0.816476948565702
AGL	635.041168368094	0.29079213912596	0.125636214544809	2.31455667603108	0.0206372061737533	0.0939727124376886
AGMAT	26.4486387180795	-0.0349990676770234	0.238151019957348	-0.146961653505795	0.883162287685566	0.946139122476301
AGPAT1	2955.18006613326	-0.0795447518413564	0.0713611512918217	-1.11467865079795	0.264988152887123	0.481120452869168
AGPAT2	247.677887494519	0.362163235672713	0.188987066135492	1.91633873723964	0.0553219931969703	0.177579450494095
AGPAT3	3481.73715117186	0.314326650114223	0.113061585091549	2.78013659422609	0.00543360377705827	0.0385432201653104
AGPAT4	1048.08929126934	-0.408685537225079	0.135525275525202	-3.01556691651278	0.00256499333568809	0.0233183570082625
AGPAT5	2674.6566392826	0.0232200712246859	0.108500741046523	0.214008411377851	0.830540497806943	0.918523564004193
AGPAT6	2036.95813691706	-0.0712797807509427	0.0866692538759661	-0.822434457010009	0.410829675315717	0.620020077341773
AGPAT9	11.6686636155082	1.34573087508209	0.391861564299289	3.43419972175242	0.000594306130628924	0.00861839745239461
AGPHD1	17.09320342534	0.776240207625537	0.206317966500624	3.76234906145795	0.000168324895567922	0.00378212925456013
AGPS	962.047207862699	0.150402671852945	0.0831436491155181	1.80894961254321	0.0704588317376167	0.206974900140796
AGR2	0.440824632910353	1.37943201178865	1.51804658277699	0.908688855427107	0.363514388548703	0.576836898595374
AGR3	4.56641065485738	0	1.52130032307406	0	1	1
AGRN	4711.15069460053	-0.513517239155327	0.150256193780625	-3.41761112294023	0.000631732992870248	0.00893655049620719
AGRP	0.427412979507392	0.222168952542753	0.719817735914624	0.308646121730326	0.757590732524489	0.876762685719952
AGT	15351.0207349346	0.517004211616959	0.229074570910933	2.25692537395596	0.0240127382293118	0.103486043456244
AGTPBP1	562.871217173743	-0.165218799249565	0.147944588908922	-1.11676135280134	0.264096377315005	0.479840462451089
AGTR1	6.3252098450282	0.95664384269335	0.52167232208165	1.83380218232782	0.0666833636825417	0.199901832041576
AGTR2	0.0452378819084646	0.0550507257294433	4.703211647542	0.0117049220521926	0.990661036657399	NA
AGTRAP	619.99786570502	0.569162372516147	0.151575788643033	3.75496890111221	0.000173363002561141	0.00385798424030637
AGXT	0.154390860422101	-0.255762352437162	3.86542427651381	-0.0661666958504828	0.94724511150895	NA
AGXT2	0.029678216026887	0.145961942220638	5.23039083411357	0.0279065077257034	0.97773671805169	NA
AGXT2L1	2933.61050816389	0.108651768460468	0.394873706843657	0.27515574366537	0.783196586464665	0.892547309819902
AGXT2L2	428.737202173237	0.188482018063728	0.129950324354812	1.45041591084531	0.146942572818591	0.332321046742583
AHCTF1	1206.6493749235	-0.00825275015501644	0.123777256557511	-0.0666742048138864	0.946841070180368	0.9752247062661
AHCY	2061.48060963466	0.0292657183452347	0.0841726781102439	0.347686672234717	0.728075506948069	0.859522962574854
AHCYL1	17478.6025099886	0.307561841419247	0.224319180495389	1.37109025068665	0.170346823761591	0.364839974897234
AHCYL2	3052.01856401909	0.230303524692082	0.192462827308534	1.19661301827852	0.231457423943832	0.442678940369921
AHDC1	1672.55535981047	-0.0783908700913664	0.11539132195317	-0.679348054641233	0.496917354947414	0.694633277886816
AHI1	340.734503271438	-0.148112918885584	0.141934477953601	-1.04353023325314	0.296702785969273	0.514580367138101
AHNAK	13558.338956808	0.236182356450575	0.21629717740438	1.09193452861855	0.274861879591458	0.491308779206122
AHNAK2	318.962705003799	0.791282125560538	0.378262843150441	2.09188436001321	0.0364488614855271	0.135390090318684
AHR	480.674796712554	1.12207150063359	0.28618903843351	3.92073542290573	8.82791450087108e-05	0.00243845712065536
AHRR	57.1800111221675	-0.31222478111123	0.243771530526198	-1.28080904458889	0.200260746395059	0.403816846806689
AHSA1	1771.811760218	-0.0393652139694089	0.0899267155187752	-0.4377477120377	0.66156917857765	0.815543769739035
AHSA2	629.713527470632	-0.322113372419433	0.222726449227906	-1.44622865194528	0.148113079894599	0.334006697098655
AHSG	2.54579805910769	-0.787166379196873	0.48849046445796	-1.61142629482098	0.107086839882738	0.27106356345318
AHSP	0.314726909448192	-0.0388063801720007	1.06093904161079	-0.0365773891335757	0.970821972320981	0.986929343772229
AICDA	0.0609526907458749	-0.185390920778673	4.08221344986673	-0.0454143133511858	0.963777072354432	NA
AIDA	943.794762307606	0.511292037245369	0.0941107980827615	5.43287324793204	5.54537992883702e-08	1.40681682364854e-05
AIF1	982.455188937466	0.678300963194938	0.244650959339129	2.77252525404854	0.00556232032475114	0.0391313530383973
AIF1L	3606.35890034277	-0.383249435653727	0.19253982154276	-1.99049439530416	0.0465365007833581	0.158937982266697
AIFM1	578.852277027695	-0.101115847373452	0.0866837181299479	-1.16649181132112	0.243415657454137	0.456242888252105
AIFM2	206.874500081039	-0.0457719102364598	0.155834960644181	-0.29372042093283	0.7689715486097	0.884064087149135
AIFM3	376.351051740964	0.49824548703846	0.448339247728128	1.11131356347503	0.26643340316011	0.482473595238911
AIG1	739.500266340132	0.37446222201129	0.120666524692583	3.10328173422821	0.00191387349893694	0.0191728541826653
AIM1	109.115146232749	1.88339450469144	0.398063425551728	4.73139299869361	2.22984346526689e-06	0.000197522390110489
AIM1L	0.0756278821608644	0.365854714250068	2.6316157701714	0.139022846114895	0.889432095763468	NA
AIM2	20.9140697665057	0.499425906126956	0.330947823708874	1.50907747490217	0.131278985123974	0.30797895766462
AIMP1	930.037241452369	0.141377924240397	0.077648014001524	1.82075389896801	0.068644274959978	0.203562132434843
AIMP2	510.402167141421	0.0524368944436025	0.102640330349811	0.510880024108371	0.609435069610899	0.779657187090438
AIP	1263.72734613819	-0.0518484208253702	0.133031773418837	-0.389744641395788	0.696725382619593	0.839712857256402
AIPL1	0.379033916907516	-0.39947851163318	1.05292656080351	-0.379398266226973	0.704392137844717	0.844988620595311
AIRE	8.18075179153747	-0.996685245846906	0.501652244303299	-1.98680511682174	0.0469439973802969	0.159804655661
AJAP1	110.562537815755	-0.756207990943286	0.322937751949739	-2.34165248992314	0.0191985814204992	0.0899502061238709
AK1	1828.48457336909	0.485819035479746	0.222758094802294	2.1809265154244	0.0291888521578405	0.117500322252583
AK2	1453.64484926346	0.328415727204688	0.100690972883219	3.26162035980707	0.00110777393560496	0.0132799939400322
AK3	1773.73004773449	0.466958289405977	0.128029213295396	3.64727922156784	0.00026503186791325	0.00502987947206439
AK3L1	222.037886241608	0.806984046274012	0.264853397676446	3.04690841557506	0.00231208143706044	0.0217106257969822
AK5	812.276816429509	-0.352017598634395	0.41673576693815	-0.84470215076749	0.398277158338133	0.608581411526717
AK7	15.6277398171095	2.38140897768201	0.561139201879687	4.24388274728417	2.19685170442686e-05	0.000901912953173602
AKAP1	1445.237507946	0.0848260586033706	0.114639805630945	0.739935471248507	0.459339149927806	0.662908233868523
AKAP10	459.196368854042	0.0551750104426209	0.121593380779992	0.453766562691872	0.649996852534423	0.807812799936
AKAP11	2556.86032257818	0.032366806613624	0.137607798815193	0.235210554142303	0.814045314748027	0.909732513023697
AKAP12	1872.15559712085	0.364854687448768	0.282114236918376	1.29328704369617	0.19591180005762	0.398336271894632
AKAP13	2370.18371966331	-0.0429443970789189	0.103999338848979	-0.41292952007397	0.679658252191882	0.828022675536207
AKAP14	3.43913019668375	0.157402988838177	0.980515120856706	0.160530914302116	0.87246287130681	0.940164433377726
AKAP2	308.374814778803	0.641454278319895	0.303658959602552	2.11241676899464	0.0346507179398133	0.130708875601788
AKAP3	102.777593718097	0.753877034249695	0.213690906910297	3.52788541707185	0.000418893442096529	0.00693604224289115
AKAP4	0.0103396393485194	0	5.23039083411357	0	1	NA
AKAP5	140.200257347986	-0.658488206573062	0.324924011463353	-2.0265913978085	0.0427042170215982	0.150040490520199
AKAP6	2542.63545934963	-0.0821866319214423	0.164679822224292	-0.499069229073522	0.61773061422489	0.785352934459274
AKAP7	531.128530009154	-0.163844438723347	0.149222708660928	-1.09798595799279	0.272210620945365	0.48875600457709
AKAP8	609.346003633619	-0.149066546789922	0.0826533224675094	-1.80351548298036	0.0713072960766275	0.208563402415406
AKAP8L	1337.05945519384	-0.122418301626263	0.109966853637213	-1.1132291011083	0.265610047271256	0.481717749525433
AKAP9	1268.08873878325	-0.343037597276202	0.13845737999366	-2.47756816784998	0.013228113725414	0.0702711790281814
AKD1	195.490623013743	0.599619386393458	0.181162014518195	3.30985161535194	0.000933454420064446	0.0118373606358243
AKIRIN1	1812.20779522586	-0.0271836171351366	0.0884897287386054	-0.307195168553808	0.758694822793235	0.87735371726482
AKIRIN2	1094.48254415931	-0.166110172894415	0.0865721650298142	-1.91874805068359	0.0550162272075803	0.177040407596047
AKNA	923.376668646241	-0.140156939714814	0.16022838364797	-0.874732282282428	0.381719590652623	0.593750763831776
AKNAD1	21.1209863831986	0.888701289791885	0.424809338691966	2.09200036074605	0.0364384834278522	0.135379505991661
AKR1A1	1564.66886359579	0.158775335441924	0.105257972027385	1.50844000111094	0.131441951739744	0.308200440237852
AKR1B1	2728.52527115488	0.237982929247659	0.102219449609502	2.32815702057486	0.0199037674404045	0.0920549244118708
AKR1B10	3.66739489379018	3.06575630515727	0.905233434525501	3.3867024661592	0.000707380590073746	0.00973230127827551
AKR1B15	1.48198283352521	2.94499435350812	1.01409121765003	2.9040724367307	0.00368342927804678	0.0296413545633284
AKR1C1	523.118214196419	1.24744948150796	0.423150823655969	2.94800201670448	0.00319834978231813	0.0269254334202456
AKR1C2	68.1045020442655	0.537602337492673	0.398580806177866	1.34879133455505	0.177403998828183	0.373895769682184
AKR1C3	667.454692415491	0.366103351900299	0.30572406399782	1.197496026688	0.231113275316301	0.442174222605293
AKR1C4	0.415249904271507	-0.00654508519781423	1.79930852308392	-0.00363755582427648	0.997097656769296	0.999264897956054
AKR1CL1	0	NA	NA	NA	NA	NA
AKR1D1	0.140017985372608	-0.115036075132872	2.16623754790098	-0.0531040906590964	0.957648972179293	NA
AKR1E2	4.36187972180426	1.43877049019622	0.418293266962883	3.4396214422545	0.000582528368410094	0.00850245545515448
AKR7A2	1049.78502167104	0.26104418622204	0.119299044298103	2.18814985281648	0.0286586885372456	0.115911052019062
AKR7A3	28.8221636244478	0.0736821347950963	0.287761613582219	0.256052688466191	0.79791015349462	0.90096173994768
AKR7L	22.7869609899697	-0.521622933772064	0.221661425661526	-2.35324180657656	0.0186105274048302	0.0883551977524119
AKT1	3184.33030250762	-0.153109363339821	0.0853253789678295	-1.79441761867297	0.0727465368427107	0.211192803601166
AKT1S1	1125.93047296751	-0.0531315603900193	0.117135380423198	-0.453591051636665	0.650123195284165	0.807858150618468
AKT2	2320.32772609821	-0.016573629521539	0.117758856477051	-0.140742106516369	0.888073679957514	0.948907159100436
AKT3	1353.21670020354	-0.258880017280199	0.1606698597202	-1.61125439289627	0.107124286781875	0.271091145833452
AKTIP	1187.58672693177	0.282625247308981	0.0899441108221764	3.14223182291217	0.00167665227608989	0.0175949002865264
ALAD	2056.05475779969	0.431220192964514	0.152525040218054	2.82720917396927	0.00469556451639321	0.0351508970269516
ALAS1	955.706367313844	-0.00788164144994886	0.0847296168116821	-0.0930210916386699	0.925886805165751	0.965606854563047
ALAS2	2.68335438663858	-1.98876553974347	0.799846912010594	-2.48643272841332	0.0129030962087645	0.0691781383500306
ALB	12.0900938616554	-0.122059751457622	0.33333804498412	-0.366174078519709	0.714235183323547	0.850892875746921
ALCAM	4351.13275079083	-0.301965438243331	0.173304560858583	-1.74239752691642	0.0814389083698024	0.226973721374115
ALDH16A1	401.81730028633	-0.183537926326439	0.155569565002462	-1.17978041735564	0.238087560004339	0.450140942487439
ALDH18A1	1194.87477899012	0.0461955975463445	0.140659851801471	0.32842063285795	0.742593644613377	0.868678045630871
ALDH1A1	918.542011948897	0.634019871665633	0.324807889230793	1.95198421185863	0.0509400790922401	0.168427356249415
ALDH1A2	66.8110495536535	0.266560026983199	0.347429468205997	0.767234939395386	0.44294184285434	0.649778121896454
ALDH1A3	113.89350643356	3.4284087062932	0.646055878300084	5.30667519861301	1.1164285300402e-07	2.50945222839785e-05
ALDH1B1	484.826102029807	-0.0573923662213708	0.127162973010355	-0.451329226288986	0.651752283615487	0.808644071770268
ALDH1L1	2720.26061160844	0.636761094007209	0.316373288799849	2.01268917620302	0.0441473387763107	0.153491385513461
ALDH1L2	378.719884852633	-0.40344391553523	0.216075661140639	-1.86714187708831	0.0618817777336756	0.190933103501537
ALDH2	7426.59126380629	0.0025658545537822	0.183083341640607	0.014014680586391	0.988818268773075	0.994904325709346
ALDH3A1	17.0957285449082	3.15678027368096	0.480097824565271	6.57528551923648	4.85598948159839e-11	6.71695406600787e-08
ALDH3A2	2398.73948132601	0.418279286193544	0.11416020478898	3.66396755302527	0.000248338258528205	0.00481146604117494
ALDH3B1	267.952980799176	0.587635802640224	0.189150252122679	3.10671435034142	0.0018917910211651	0.0190083850076249
ALDH3B2	0.418772539990259	0.955810195330176	0.779710710405259	1.22585233545578	0.220254248409045	0.429195047127379
ALDH4A1	3079.63619415575	0.237791663390931	0.185214948959472	1.28386863331946	0.199187923971239	0.402630086426577
ALDH5A1	2621.18872668847	-0.0743018044395483	0.151966806981439	-0.488934431902773	0.624888117923341	0.790540181264776
ALDH6A1	1329.89925580655	0.167073081917568	0.207780706359347	0.804083713280975	0.42134862992136	0.630392800003819
ALDH7A1	2320.71341893777	0.594004939100564	0.260812873349396	2.2775138798644	0.0227555567348902	0.0998550762033879
ALDH8A1	23.6485435753145	-0.909591809220357	0.306392256273638	-2.96871670414543	0.00299046157918236	0.0256557634145311
ALDH9A1	3259.06768777199	0.305549579444183	0.119266433560938	2.56190757383606	0.0104099017603031	0.0600163044096729
ALDOA	19787.4054373597	0.0942779664270331	0.12182224921366	0.77389776527342	0.43899125123461	0.646150722594135
ALDOB	7.40396169574684	-0.564210406765043	0.267179451349275	-2.1117282931593	0.0347097608072876	0.130849249232001
ALDOC	18871.7828756513	0.021846779532874	0.258870259875045	0.0843927747568192	0.932744151703125	0.969066636002172
ALG1	357.799507895369	0.237330371407644	0.126056642939314	1.88272800126764	0.0597372386773247	0.186547890497103
ALG10	58.3406164935801	0.820235633837971	0.177458155882066	4.62213545362818	3.79809870353854e-06	0.000281059304061852
ALG10B	316.908246018219	0.370033758409824	0.13890326612318	2.66396729708053	0.00772250698301609	0.0486928340217335
ALG11	11.8568919222777	-0.121870677288903	0.169516095440639	-0.718932777280605	0.472182339671862	0.674139168874905
ALG12	306.935566474423	0.161377781087847	0.0978094410941959	1.64992028665649	0.0989592408976389	0.25808340388997
ALG13	453.192509581682	-0.133564199519575	0.0894129388264172	-1.49379051032951	0.135230382648036	0.31421536901111
ALG14	165.781026185837	0.390930373637058	0.100013899864177	3.90876042398065	9.27709064115841e-05	0.00251635504931793
ALG1L	25.9632318130189	0.480097234811561	0.338667596557295	1.41760605293202	0.156305811973959	0.345973795041325
ALG1L2	0.00553608702506999	-0.0446300835854814	5.23039083411357	-0.00853283913209617	0.993191862012796	NA
ALG2	448.595884518961	0.363256112814251	0.0752676415924884	4.8261923069276	1.39168134010438e-06	0.000149886974122097
ALG3	429.949734798443	0.179219270191473	0.122771961409996	1.45977361714514	0.144352301711357	0.328616671651301
ALG5	385.655091219794	0.159308363792362	0.0899855168566511	1.77037782698013	0.0766642209425999	0.218621147406245
ALG6	197.36826809125	0.18125033556245	0.132911640030006	1.36369046023006	0.172665007766734	0.367994515723588
ALG8	504.811181485662	0.290671867443575	0.0733872384144014	3.96079582395805	7.47003862078962e-05	0.00214860370068894
ALG9	551.715501667744	-0.0962389540677767	0.0702199643362611	-1.37053550193958	0.170519800995679	0.365077635611893
ALK	130.412538653759	0.430809758696685	0.407200341119582	1.05797985707033	0.290064625740248	0.507837669340376
ALKBH1	208.2883160136	-0.0378287686364121	0.08310981380853	-0.455166085723194	0.64898975723186	0.807119013385663
ALKBH2	457.706332587151	0.0245808066840595	0.139779674256764	0.175853941674715	0.860408690573782	0.933896847582407
ALKBH3	263.632572906623	0.00388464727400052	0.11053608322873	0.0351437029477705	0.97196515300642	0.987227597230087
ALKBH4	480.672665007641	-0.0223831541925113	0.110310430088799	-0.202910587643372	0.839204918684842	0.923369160854462
ALKBH5	2021.19676757242	0.142917221956664	0.0622921857624193	2.29430417647804	0.0217730328511154	0.0969355475931559
ALKBH6	128.732027126735	0.037636796958194	0.155870875572405	0.241461381544053	0.809197544123222	0.907084256370026
ALKBH7	672.330864460686	-0.0280289798295162	0.151312246887841	-0.185239333933706	0.85304131889634	0.930562539673917
ALKBH8	239.6369032544	0.170937577314918	0.105804447899012	1.61559916155958	0.106181005313636	0.269643671451744
ALLC	0.887943690477552	0.19187766349437	0.909014668250984	0.211083132314639	0.832822402159522	0.920109820980291
ALMS1	579.084243753513	-0.113515038143159	0.126536480256099	-0.897093375075827	0.369669093526746	0.582697364842169
ALMS1P	7.76982564019461	-0.407915094199495	0.248660680365437	-1.64044871750537	0.100911902945179	0.261130786985208
ALOX12	5.06124004161308	-0.346827802780367	0.229419249851715	-1.51176417412462	0.130593866385911	0.307031277705659
ALOX12B	4.01436555464494	-0.440401602972711	0.43027210834531	-1.02354206659213	0.306051620882636	0.523387565070049
ALOX12P2	5.57706027746175	0.294620438927855	0.546582952964602	0.539022370401178	0.589871418888193	0.765300710999097
ALOX15	2.26146242621931	-0.170043211376492	0.790080691705252	-0.215222588226378	0.82959378070513	0.917733335259283
ALOX15B	141.676359789203	-0.465681615888875	0.606857308525804	-0.767365918390473	0.442863986101167	0.649767196948275
ALOX5	361.700222737097	0.595200900573618	0.23545861869555	2.52783654245088	0.0114767770713436	0.0638735392438566
ALOX5AP	594.86643006327	1.16901438712433	0.25327592022185	4.61557650684031	3.92005593354421e-06	0.000285386420230737
ALOXE3	5.48014439002048	-0.448370810302803	0.388592061257075	-1.15383420045265	0.24856814976131	0.462133216398664
ALPI	0.00519988367724416	-0.0446300835854814	5.23039083411357	-0.00853283913209617	0.993191862012796	NA
ALPK1	178.54170938887	0.501912185789823	0.217919498681455	2.30319998360264	0.0212675937563071	0.0955845715885813
ALPK2	9.16859254400885	1.32326028760927	0.594108037695396	2.22730581586193	0.0259268421078101	0.108501030434811
ALPK3	281.953738707917	0.339945914049533	0.233053082135812	1.45866302618314	0.144657877308272	0.329062359235591
ALPL	513.053442243813	-0.223285972407864	0.223041809351541	-1.00109469635775	0.316781028889295	0.534211700391375
ALPP	0.079508311076885	0.0755935070161014	5.23039083411357	0.0144527453900895	0.988468779037224	NA
ALPPL2	0.0267387149451062	0.125427276228054	5.23039083411357	0.0239804787454877	0.98086817993401	NA
ALS2	803.745497589789	0.109738650732599	0.0921126452324132	1.19135272313278	0.233515144258811	0.445193948691894
ALS2CL	60.4561118853246	0.0632769122271757	0.318799099116977	0.19848522910649	0.84266544032058	0.925475474735521
ALS2CR11	3.84445976739564	-0.464512847024702	0.364712638701427	-1.27364066317695	0.202790794256061	0.406826502025459
ALS2CR12	10.416426472185	0.109521036198861	0.375165083146326	0.291927583666266	0.770341992927514	0.884452159163744
ALS2CR4	850.472196592223	0.221707041772343	0.124910172896682	1.77493183005779	0.0759091438522427	0.217114398719744
ALS2CR8	237.106876904086	-0.236847053191023	0.129535017753754	-1.82844034993895	0.0674834902940844	0.201141740836769
ALX1	0.29189572346678	0.24563397042313	1.94259804517439	0.126446112222397	0.899378802772138	0.955264597250359
ALX3	58.8800847647222	-0.407240597960546	0.203587729192942	-2.00031995825544	0.0454657252381451	0.156531623823918
ALX4	3.33928494635461	2.64882576269545	0.857462216983403	3.08914574920183	0.00200732936698664	0.0198002175958057
AMAC1	0.096614204017904	-0.557815321163914	2.16193193729491	-0.258017059437068	0.79639374135307	NA
AMAC1L2	1.13113858479272	-1.46972244152746	0.523133263409772	-2.80946088564096	0.00496245488233605	0.0363903248531493
AMAC1L3	0.733039725561803	-0.51745867106534	0.572609413089343	-0.903685233313832	0.366162331394526	0.579555588692577
AMACR	329.736897578578	0.3394644007241	0.133351801548695	2.54563040605147	0.0109080612224769	0.0619156429616726
AMBN	0.0899494168995847	-0.0446163721127809	5.23039083411357	-0.00853021763149796	0.993193953591528	NA
AMBP	0.631094192630303	2.15560158525572	1.71934106838741	1.25373704199219	0.209937599415532	0.416044723447682
AMBRA1	882.357795537486	-0.0467326831532356	0.0777555622642464	-0.601020451687021	0.547826364555678	0.734602064686071
AMD1	1822.01440324193	0.329899825962265	0.119083008132176	2.7703350052771	0.00559986636468735	0.0393333698504323
AMDHD1	12.8663940210779	0.542715697864199	0.277309363698201	1.9570767125442	0.0503384498892661	0.166823812368003
AMDHD2	208.141876224244	-0.122641342418029	0.137023281928859	-0.895040176323492	0.370765611547481	0.583503170562472
AMELX	0.0694632632020615	-0.537254762199657	4.5149277493993	-0.118995207015469	0.905279153049393	NA
AMELY	0	NA	NA	NA	NA	NA
AMFR	3885.25516406719	0.157728864771481	0.0776941286450174	2.03012592485773	0.0423437409361235	0.149152820668633
AMH	99.8312689404631	-0.679669954216439	0.383962560304125	-1.77014642698	0.0767027511471823	0.218653911085706
AMHR2	0	NA	NA	NA	NA	NA
AMICA1	32.164568893746	0.665418973989025	0.43813231859317	1.51876258780833	0.128822266121874	0.304720072270921
AMIGO1	256.21948188849	-0.141271819479752	0.24141378982231	-0.585185376459784	0.558423076637759	0.742554445322797
AMIGO2	170.135868976457	1.47881238476092	0.355946431854492	4.15459252409487	3.25867737685599e-05	0.00118400331851471
AMIGO3	147.308089129907	-0.0100845809322161	0.142979002858677	-0.0705319014022208	0.943770310120892	0.973714941568299
AMMECR1	108.519992802602	-0.0883410722091782	0.1270940753397	-0.695084109727836	0.487002592405276	0.687218046777447
AMMECR1L	687.494315945778	-0.221128782544129	0.0736726441878426	-3.00150462877807	0.00268648954960395	0.0239863232775463
AMN	0.710250962717636	-0.189197153586252	0.591272352615742	-0.31998308858728	0.74898115047137	0.872566509910273
AMN1	344.116185630228	0.147554598182651	0.109970301058948	1.34176770238682	0.179671327421917	0.37683467708665
AMOT	2519.23759340677	0.451458455344819	0.22728163728785	1.9863393309379	0.0469956582243128	0.159804655661
AMOTL1	1689.60095714742	-0.110389706918982	0.145620124331397	-0.758066286688238	0.448411301013345	0.654438114992449
AMOTL2	2465.71370026334	-0.755559209853994	0.223670688254514	-3.3779983231162	0.000730155259118551	0.00993917628271747
AMPD1	0.0771841828016698	0.86725434908499	5.23039083411357	0.165810620389704	0.868305987959657	NA
AMPD2	1736.43921962655	-0.237434710113564	0.0957044163710812	-2.48091696409225	0.0131044896351188	0.069945067562691
AMPD3	374.419778403442	0.335308530239705	0.207563729944647	1.61544856767184	0.106213589813102	0.269688332677096
AMPH	524.705088396571	-0.093702693351818	0.300006012033443	-0.312336051923428	0.754785144034712	0.875196444417861
AMT	222.285960507741	0.420315374493463	0.248946752971693	1.68837460009473	0.0913393430856074	0.244709786859656
AMTN	0.0501707127971172	1.10767902098092	5.23039083411357	0.211777485872841	0.832280633804404	NA
AMY1A	3.66761954866318	0.285936179620992	0.419531079152654	0.681561376092827	0.495516344766155	0.693900390279962
AMY2A	3.98985207546484	-0.352714681422679	0.394783955410167	-0.893437224560508	0.371623075602372	0.584187966210495
AMY2B	305.993181525797	-0.267795906043859	0.259831526782722	-1.03065208968193	0.302703999527438	0.520583714566029
AMZ1	163.759877168261	-0.348129211213416	0.249699166498911	-1.39419452653613	0.163258870358931	0.355630369619108
AMZ2	1724.43289272592	0.26745345153443	0.0842161696113945	3.17579691368727	0.00149425519942784	0.0162060898649647
AMZ2P1	493.683133488014	0.152935391015211	0.123021023818231	1.24316467436639	0.213807157250769	0.420746294045878
ANAPC1	414.815206656794	0.0313775835607595	0.124234947797357	0.252566480825833	0.800603234789035	0.902428845231393
ANAPC10	105.837095160871	0.191457004206233	0.0797504367262518	2.40070163958375	0.0163636725185766	0.081532712449167
ANAPC11	1566.16996892485	0.194398244632016	0.133232041176892	1.45909529655794	0.144538880614125	0.328925135838923
ANAPC13	1237.62737353851	0.135123998776012	0.0788777501606867	1.71308129986901	0.0866975837965315	0.236426440981078
ANAPC16	1291.86260304691	0.228200453089876	0.0993667662886029	2.29654704096021	0.0216446227195851	0.0965424988543191
ANAPC2	1070.01578848186	-0.23805774865932	0.0954267840272963	-2.49466385235433	0.0126076502935538	0.0681222258349411
ANAPC4	476.62584601785	0.0487414874785282	0.0860144388555363	0.566666342617091	0.570940892005855	0.751716889639503
ANAPC5	2223.08280150735	-0.218251752211829	0.0799519623835249	-2.72978605784419	0.00633754392495083	0.0424616936832745
ANAPC7	1093.37367873904	0.130563437585603	0.0760249115164802	1.71737704104135	0.085910303791638	0.234849358890428
ANG	64.3744841906895	1.88660014395921	0.264556848686227	7.13117106333836	9.95185416996233e-13	1.87526027612255e-09
ANGEL1	862.924373613089	-0.332312065081174	0.123201590693853	-2.69730336442607	0.00699035556653133	0.0454777763376868
ANGEL2	733.136845276768	-0.0382948253311887	0.075328652780279	-0.508369975006565	0.611193905121489	0.781073754665242
ANGPT1	217.205728070498	1.38766642066408	0.388995970240546	3.56730281757412	0.000360674595617815	0.00622860977160111
ANGPT2	287.543729534453	1.04448122693182	0.379069041970361	2.7553851971206	0.00586230733859756	0.0404047568273903
ANGPT4	3.79040637335295	-0.6013178662261	0.452705776282279	-1.32827522362152	0.184087201658133	0.382467482405147
ANGPTL1	131.255898888114	-0.270261182910103	0.370765669245498	-0.728927204776215	0.466046192567143	0.668757709724126
ANGPTL2	3476.74205394715	-0.805526538943974	0.223053027732849	-3.61136787575353	0.000304586247580602	0.00554359302023723
ANGPTL3	0.137564404473995	-0.0358693326889426	1.95414695895865	-0.0183554939532577	0.98535525713468	NA
ANGPTL4	470.529792064288	1.37141007163591	0.344257317757121	3.98367732767691	6.78569944857278e-05	0.00199706133362088
ANGPTL5	1.95385273057167	0.776995989911593	0.46022680791223	1.68828928813676	0.0913557104749903	0.244709786859656
ANGPTL6	18.593707564306	0.169852106582813	0.317177881346929	0.535510565432617	0.592296853656955	0.767063883504455
ANGPTL7	2.40293194415933	3.51130910332481	0.671528696284134	5.22882956864605	1.70586527374415e-07	3.40831881694081e-05
ANK1	202.900304834815	-0.556092607320603	0.30462814163927	-1.82548008968622	0.0679286130700834	0.202166885174816
ANK2	6281.21327939157	0.475121140188623	0.159766592852412	2.97384535594076	0.00294093250556195	0.0253883093206985
ANK3	733.194951971668	0.0631737083310294	0.337890808988598	0.186964861577993	0.851688183498284	0.929988882418396
ANKAR	20.7148503348662	-0.228695106528942	0.175621208479775	-1.30220665549787	0.192845750640484	0.394110479903517
ANKDD1A	281.570088149329	-0.275970535279696	0.158528870402276	-1.74082193722447	0.0817147954126824	0.227490170085945
ANKFN1	89.0451343055156	0.219030010612823	0.237449863952028	0.922426347050143	0.356306232101305	0.570346125577632
ANKFY1	4266.4631017823	0.200848004182376	0.0981750204667491	2.04581576074538	0.0407745007886746	0.145669939467994
ANKH	1815.46899075249	0.226322454958939	0.152224800550862	1.48676466738624	0.137076976373625	0.316827530739141
ANKHD1	1623.77542673312	0.00353972811436041	0.101342908854734	0.0349282268918715	0.972136972536089	0.987302139645561
ANKHD1-EIF4EBP3	391.916539824709	0.255274539862489	0.152934722134771	1.66917320212955	0.0950830593099423	0.25106954075057
ANKIB1	2797.20394474792	0.178681977798519	0.136710081395285	1.30701390837356	0.19120798790845	0.392097729297699
ANKK1	3.20002184159404	0.566924135242617	0.632842297312541	0.895837932530971	0.370339327399325	0.583291739099121
ANKLE1	29.6617853713054	-0.838566637046245	0.226109606375533	-3.7086731983139	0.000208348124640184	0.0042866315529517
ANKLE2	1177.99843423156	-0.0425733891483595	0.0644452386518543	-0.660613414411407	0.508860264078207	0.703546460760751
ANKMY1	172.921709245259	-0.264606186269854	0.126908931810901	-2.08500837958455	0.0370685399079568	0.136818192867025
ANKMY2	630.165959332192	0.219308846149524	0.117842688305327	1.86103057646905	0.0627398588746871	0.192655078942046
ANKRA2	307.21481381346	-0.217959367456616	0.0839017318236316	-2.59779342713432	0.00938249190154438	0.0558662150243613
ANKRD1	1.85150773100607	1.8229404163812	0.747837066377051	2.43761709380435	0.0147844251424828	0.0758497954100217
ANKRD10	2078.15727874604	-0.120054961552846	0.201114859302552	-0.596947246808048	0.550542601666576	0.736581596667464
ANKRD11	2681.22333939603	-0.207435062511546	0.0765156559267465	-2.71101462830217	0.00670776668960262	0.0441666278331872
ANKRD12	1110.66075400182	-0.0703020752639279	0.110721186828251	-0.634946908336339	0.525463041970559	0.716583984583239
ANKRD13A	1012.87085845435	-0.058139809863037	0.0955522341169627	-0.608461020302987	0.542881751175032	0.730586712290782
ANKRD13B	753.792253902636	-0.651738472342087	0.158294296375199	-4.11725808993963	3.83406633164464e-05	0.00132584963030065
ANKRD13C	681.386516356981	-0.077987850629997	0.0641511126042377	-1.21568975913358	0.224103126755258	0.432943291225914
ANKRD13D	623.926913974656	-0.186680247268501	0.122436057050916	-1.52471626222713	0.127329883780342	0.302471566486562
ANKRD16	193.817958252886	-0.418159072594621	0.122598079473021	-3.41081258688593	0.000647695943592915	0.00908202847715031
ANKRD17	2307.51515713661	0.0596571800299118	0.119504412505933	0.499204830842126	0.617635091690899	0.785340105310669
ANKRD19	65.1879067954583	-0.510949510883295	0.203578423871581	-2.50984117651684	0.0120785473134977	0.0662588278802059
ANKRD2	5.2429685880114	0.411637676045827	0.510283290961085	0.8066846070357	0.419848214731002	0.628723400840512
ANKRD20A3	75.1895781189559	-1.2077058083427	0.353395689917147	-3.41743219512904	0.000632148383448757	0.00893655049620719
ANKRD20A4	7.35051396488357	-1.29924523150973	0.547897754587705	-2.37132789946805	0.0177242989353397	0.0855520279440798
ANKRD20B	26.941479492558	-0.962977446930723	0.323527583421527	-2.97649256594005	0.00291566151042557	0.0252428624364336
ANKRD22	200.556271816595	0.527406036338909	0.403685089471605	1.30647886209829	0.191389762759137	0.392280896721129
ANKRD23	56.6210588788263	-0.537779185447608	0.174172818071448	-3.08761832875096	0.00201767426321129	0.0198602888573322
ANKRD24	210.609218185264	-0.403765263473072	0.247663664708778	-1.63029673306276	0.103038797712923	0.26454035172802
ANKRD26	254.118812127378	-0.308561329965128	0.139644208338494	-2.2096249721806	0.0271312007161452	0.111820593921092
ANKRD26P1	0.59443888981768	0.545136057012856	0.905863460234611	0.601786120031456	0.547316515465198	0.73408261215001
ANKRD27	623.115386703563	0.184875929908521	0.0884589463538626	2.08996305663603	0.0366211184370017	0.135749526228441
ANKRD28	1386.778596824	-0.189438863949189	0.124716165283296	-1.51895998019883	0.128772569725293	0.304682677473714
ANKRD29	40.5164203159477	0.153819888320158	0.336566420876175	0.457026841595554	0.647651752726171	0.806514807307618
ANKRD30A	0.00511090731269006	0	5.23039083411357	0	1	NA
ANKRD30B	0.96391330581257	-0.804916306535578	0.833070989227609	-0.966203741270435	0.333942241164006	0.548697860070463
ANKRD31	0.653495901619542	0.66457376138998	0.644464090333577	1.03120371073894	0.302445300895736	0.520288089611319
ANKRD32	117.481864395424	0.0391913538444904	0.152021466346924	0.257801445981667	0.796560148470487	0.900128485502187
ANKRD33	0.278259051399368	-0.387748536297286	1.02627379244144	-0.37782172667087	0.705563032459572	0.84563676352309
ANKRD34A	102.217283038495	-0.356995041638386	0.30604500938326	-1.16647888608868	0.24342088031869	0.456242888252105
ANKRD34B	2.3811995679628	0.270892142026671	0.777492526788654	0.348417679518491	0.72752652701281	0.859044061247906
ANKRD34C	8.26118934946335	0.646457387486616	0.650461006480754	0.993844951573962	0.320298357828382	0.537076190830843
ANKRD35	301.251106925521	0.745404704138536	0.323945791565715	2.30101678597459	0.0213906822892587	0.0959220072133292
ANKRD36	219.188264916444	-0.497124383592989	0.195578564013231	-2.54181426324082	0.011027875848467	0.0623438470477533
ANKRD36B	30.0029314445816	-0.777275177502936	0.245699788534524	-3.16351585867856	0.00155875859110265	0.0166743587062509
ANKRD36BP1	97.2550740516277	0.262429890807381	0.26814493553974	0.978686732528227	0.327734789551233	0.543314002554649
ANKRD37	84.6088875158398	0.104121133675823	0.173006687000391	0.6018330012619	0.547285305461797	0.73408261215001
ANKRD39	140.331723317863	-0.0827330206229006	0.12427907478173	-0.665703544769734	0.505600607326509	0.701088072250562
ANKRD40	2712.2661442142	0.239066626563729	0.112898474514263	2.11753637586598	0.0342143514682001	0.129494301895363
ANKRD42	253.656949973922	0.351147440936157	0.117516183825838	2.98807729713694	0.00280738542444984	0.0246255632694912
ANKRD43	227.709154842998	-0.586448291142111	0.407230178192254	-1.44009045141357	0.149841810227563	0.336806928939004
ANKRD44	165.44223291611	-0.0845575279956724	0.222764440901187	-0.379582700244246	0.7042552045507	0.844880718408879
ANKRD45	95.0006848232663	1.62122063749541	0.349356383784522	4.64059256605813	3.4741150865498e-06	0.000264709904603129
ANKRD46	1267.78864371491	-0.120185059707914	0.137872753692234	-0.871710011509574	0.383366597208465	0.595310721157393
ANKRD49	179.145846715647	0.0219765359941381	0.0845126223953257	0.260038505151789	0.794834072151816	0.899092726372846
ANKRD5	20.3253859955524	1.35979080794607	0.381057330848979	3.56846778125622	0.000359074998578481	0.00622050734531624
ANKRD50	570.64611376578	-0.134344171779031	0.156197516471181	-0.860091599496187	0.389738551507283	0.601104608731792
ANKRD52	1413.93166169533	-0.294137338498518	0.107022707047667	-2.74836384364217	0.00598935048223404	0.0410131379937291
ANKRD53	24.9803987301993	0.642521734070862	0.363262487849447	1.76875332731067	0.0769350486540078	0.219142411673748
ANKRD54	521.282456466255	0.0645726022182281	0.112775676516931	0.572575613931554	0.566932075100175	0.748830070108075
ANKRD55	8.56571860640687	-0.0266488469894423	0.342074229311253	-0.0779036966423875	0.937904658854785	0.971456599055004
ANKRD56	14.6323995981503	0.0116311924693766	0.536875106622175	0.0216646149652121	0.982715490310828	0.99215035353261
ANKRD57	345.679030135224	0.182221104457078	0.127014078211135	1.43465281190463	0.151386057222866	0.339006734866946
ANKRD58	26.7458318048614	0.478659046738841	0.263830113288571	1.81426995111545	0.0696361753844616	0.20554788341487
ANKRD6	741.993469807674	-0.0214392762613634	0.148819464562064	-0.14406231284633	0.885451264217158	0.947692675028447
ANKRD7	3.77534649877927	1.22044276651065	0.441697434235045	2.76307415872649	0.00572597552064657	0.0398623661681249
ANKRD9	76.5627333141761	-0.693945048212057	0.258488015796864	-2.68463141733195	0.00726098313656161	0.0465427569665061
ANKS1A	1137.01893999225	-0.0893606724831853	0.11132941270538	-0.802669036974689	0.422166053848398	0.630843535935538
ANKS1B	677.090254480106	-0.294539444121473	0.272532722309622	-1.08074891567277	0.279808817653881	0.496518795494059
ANKS3	467.345742230812	-0.176649927232784	0.182533258320765	-0.967768443175201	0.333160027290958	0.547782448593101
ANKS4B	0.086037562559366	0.0550377431872401	2.81210970022366	0.0195716913827589	0.98438504651079	NA
ANKS6	521.481458609927	-0.29009361450606	0.123616115375417	-2.34672974170931	0.0189389863776863	0.0891449649538777
ANKZF1	721.020140586723	-0.313365302928853	0.170969276350661	-1.83287494465459	0.0668211705935987	0.200062985283732
ANLN	1501.63769859107	-0.415588863584859	0.341854939041009	-1.21568775560386	0.224103890264198	0.432943291225914
ANO1	38.9096951339119	-0.355831413178854	0.337358383845632	-1.0547578783211	0.291536073511307	0.50951517872294
ANO10	523.116582836717	0.353844936268427	0.102394118738536	3.45571543197682	0.000548834412243364	0.00813614212774952
ANO2	15.703152642862	0.371400623060178	0.289269466079264	1.28392611945572	0.199167807152445	0.402630086426577
ANO3	88.0633074641989	-0.499885832143456	0.435737172598382	-1.14721869874572	0.251291245358982	0.46506400388143
ANO4	80.5951271442741	-0.484414212315835	0.339479474852526	-1.42693225422912	0.153599422729758	0.341902686722341
ANO5	179.758410496248	0.209387461653334	0.32056918943566	0.653174005967155	0.513644106122743	0.707170072452275
ANO6	1767.60568959971	0.774586850541784	0.188107804102952	4.11778157868374	3.8253699263879e-05	0.00132539117565139
ANO7	18.8310543712626	-0.389920590461114	0.311458419468703	-1.25191860642667	0.210599524099028	0.416856098513345
ANO8	971.657967190783	-0.53473952209601	0.147135638979935	-3.63433037572177	0.000278703546197765	0.00523150916988266
ANO9	2.18925170734362	-0.783566393676741	0.758672013186276	-1.03281309980833	0.301691372116686	0.519786744601153
ANP32A	2850.73552364549	-0.00984275204627691	0.086165398811965	-0.114230911502613	0.909054748447535	0.959149340034266
ANP32B	2483.64450489623	-0.0491852927375361	0.137760090398339	-0.357035862820028	0.721064958069998	0.85486163668213
ANP32C	2.34911657972759	-0.158289320576113	0.356564172921887	-0.443929403447917	0.657093625340204	0.812477313543804
ANP32D	0.0816096894846889	0.316006346602128	2.16980187085044	0.145638341844674	0.884206898260296	NA
ANP32E	1868.4302930882	0.346990895747859	0.100452260061832	3.45428659877114	0.000551750686959722	0.00816019825229996
ANPEP	53.2464933769672	0.0681375852776074	0.26693398995692	0.255260056198178	0.798522248754658	0.901326161390137
ANTXR1	5361.17256869657	0.254988402455267	0.13759365219997	1.8531988822034	0.0638538578422508	0.194522842021832
ANTXR2	377.809338428304	0.770640337141381	0.20876665541379	3.69139571457865	0.000223026838478569	0.00448224393234378
ANTXRL	0.329296384433132	-0.598874153032449	1.07710718268774	-0.556002376233399	0.578209230343023	0.757499511925836
ANUBL1	106.149559720034	-0.0208185761226761	0.220861700300097	-0.0942606893562294	0.924902076181575	0.96526924746936
ANXA1	2785.08015790617	2.31971795991218	0.378242210512922	6.13289023656691	8.62966916418467e-10	6.74690047436386e-07
ANXA10	0.0145733136802935	0	5.23039083411357	0	1	NA
ANXA11	1143.42202478479	0.587906974151336	0.180045279768792	3.26532844907851	0.00109337213006208	0.0131687994928173
ANXA13	5.26261827039528	1.04903493162216	0.488604369207071	2.14700276488437	0.0317930614992527	0.12387695140413
ANXA2	2042.97850276768	1.75360666392928	0.297620304827845	5.89209350129399	3.81333289737837e-09	2.07791976244418e-06
ANXA2P1	12.0915547309014	1.60285577957746	0.338430883948033	4.73613921069798	2.1782798981472e-06	0.000194874771783497
ANXA2P2	712.857777787946	1.86062700601726	0.330079681520859	5.63690257287066	1.7313599831006e-08	5.87421041813489e-06
ANXA2P3	1.34700484355201	2.42475548702596	0.654098869873287	3.70701678095803	0.000209715051703249	0.00429999550710128
ANXA3	45.9261355025901	-0.119841598867812	0.4198619097004	-0.285430985995674	0.775313971058262	0.887795833064571
ANXA4	448.335792337727	0.693372756644281	0.160441708466819	4.32164904793244	1.54867381798843e-05	0.000715893382906632
ANXA5	6749.05260314707	0.435911562802892	0.187688878427682	2.32252207192368	0.0202048413524171	0.0927589131367484
ANXA6	4618.46482151372	0.228436325536383	0.121079478945202	1.88666425992607	0.0592054976847745	0.185605519415554
ANXA7	2062.14350171724	0.423241133095564	0.0972175122969471	4.35354827639274	1.33951580237358e-05	0.000654542748866349
ANXA8	2.19595743519418	1.07906076527323	0.56849605678807	1.89809718535215	0.0576832808856381	0.182552051546206
ANXA8L1	0	NA	NA	NA	NA	NA
ANXA8L2	1.68559881446822	1.15636039466362	0.655038823448793	1.76533108156149	0.0775081387118171	0.219973382309958
ANXA9	48.8408261175581	-0.627334858681839	0.142371956646125	-4.40630917394163	1.05146854839264e-05	0.000566093037041809
AOAH	254.425620754298	0.253607703400074	0.251120696087498	1.0099036333975	0.312541461740179	0.529550604448497
AOC2	24.9929613767007	-0.240059767208709	0.252346182204804	-0.95131127053817	0.341446387319076	0.556559470369442
AOC3	52.4057787986398	-0.0476459260003665	0.267195959842418	-0.178318287553698	0.858473017582669	0.933147663795658
AOX1	33.1929846730228	1.44712536337823	0.459720791027562	3.14783536359893	0.00164484305971344	0.0173573298013374
AOX2P	0	NA	NA	NA	NA	NA
AP1AR	372.513669693916	0.0420640719397591	0.111081486779036	0.37867761009927	0.704927281826254	0.845124757977589
AP1B1	4544.16781166567	0.10228071450011	0.103578401218364	0.987471454444271	0.323411570160012	0.539629475235903
AP1G1	2111.2642670852	0.0828871386611914	0.0772616027557104	1.07281153515891	0.283355684196805	0.500335500120519
AP1G2	345.004245070615	-0.365175913164187	0.179778131752653	-2.03125880552932	0.0422287478497453	0.148931291317615
AP1M1	1739.54996254838	0.0217059013979009	0.0666370723951459	0.325733118483789	0.744626284691658	0.870093563670505
AP1M2	0.704454957807935	0.302503467004256	0.724804544859528	0.41735867848743	0.676416074436061	0.826031500883481
AP1S1	1117.86423781976	-0.156369414581007	0.146687007530951	-1.0660072573095	0.286420361274877	0.504003418773348
AP1S2	1049.21617980111	0.62813201809734	0.150803884608083	4.16522438881307	3.11046483778307e-05	0.001148508803142
AP1S3	25.9875637191524	-0.215918955242227	0.256571394941574	-0.841555058354796	0.400037054114113	0.610495315885597
AP2A1	2980.23113710453	-0.268961234550162	0.0963636079908662	-2.79110797279047	0.00525279463541866	0.0377219461398156
AP2A2	2430.33906158648	-0.199603771394266	0.0947461694066764	-2.10672128112655	0.035141746411508	0.131952157855865
AP2B1	10736.4798304066	0.0788810020921265	0.0916832765437482	0.860364125997255	0.389588354394055	0.600949185479993
AP2M1	8449.3931071091	0.0521158797638441	0.100004599772541	0.521134826621786	0.602272851431588	0.773686984886613
AP2S1	1037.26577301502	0.0713265365171571	0.13668988577728	0.521812832833699	0.601800653801447	0.773408047960029
AP3B1	877.229840075911	0.417388053000908	0.087572710678431	4.7661885736707	1.87743555285028e-06	0.000178624582599755
AP3B2	741.318047663368	-0.601883730644963	0.196085554907424	-3.06949551143185	0.00214420627702179	0.0206519106981284
AP3D1	3702.03146383487	-0.211344740015917	0.0749258285047037	-2.82071942658131	0.00479160910882879	0.0355521981077386
AP3M1	1300.75659442341	0.0665416642981324	0.0999166900559885	0.665971463434644	0.505429340573515	0.701044943031152
AP3M2	901.867598941947	-0.00539698553698114	0.116017523780886	-0.0465187099422502	0.962896821851038	0.983684277384693
AP3S1	616.713265965991	0.137091817055524	0.0874312969618543	1.56799477783495	0.116882351082672	0.286619178667478
AP3S2	2020.85289094655	0.110451874019226	0.0732456562621126	1.50796483581183	0.131563527077377	0.308364877985584
AP4B1	400.843163427	0.0645472741012911	0.107972214654491	0.597813745951594	0.549964217660033	0.73627509147129
AP4E1	254.884768244671	-0.116376197434569	0.0868497816373299	-1.33997109999121	0.180254740795885	0.377690602306177
AP4M1	386.044780000007	0.0442579138704754	0.117337853299103	0.377183599547017	0.70603716742562	0.845889822416384
AP4S1	128.737440268351	0.159950446448309	0.114235334242879	1.40018364290189	0.161458332764005	0.352947208821097
APAF1	501.057552040841	-0.15103608326124	0.108707717294744	-1.38937774630783	0.164717913635488	0.357249731394686
APBA1	875.442290445115	-0.438462446562742	0.184401467993737	-2.37776006521616	0.0174181555226188	0.0846293630391062
APBA2	3630.5315201306	-0.124047264023484	0.115218402887312	-1.07662717860104	0.281646857137386	0.49851735173154
APBA3	257.936834482158	-0.199036288055309	0.126710928315913	-1.57079022859872	0.116231382515729	0.285724226985351
APBB1	3815.8209096256	-0.246116577970607	0.133235000891512	-1.84723665946465	0.0647128484347166	0.196101523517539
APBB1IP	873.993912881322	0.470028247714009	0.229592708010662	2.04722637659808	0.0406358627730142	0.145328974619002
APBB2	2257.78530909337	-0.360568438580309	0.14881484154023	-2.42293332337309	0.0153957521639295	0.0779190586579736
APBB3	502.344304342091	-0.189396937735374	0.189404964036471	-0.999957623596941	0.317331015995337	0.534492912104547
APC	3875.76935113116	0.224738292571996	0.151434172996751	1.48406590219777	0.137791438035827	0.317784486181896
APC2	8236.31890084916	-0.35519463842958	0.144237395203206	-2.46256969580719	0.0137945359657759	0.072446973433986
APCDD1	2443.44060395108	0.39145926310404	0.182436536698902	2.14572842801831	0.0318946517396888	0.12414061203097
APCDD1L	22.1314924120695	2.56932606838092	1.16464561997212	2.20610117302672	0.027376916611106	0.112435653494044
APCS	0.0403066760592248	-0.0446254974892676	5.23039083411357	-0.00853196231497882	0.993192561586171	NA
APEH	1530.28941947649	0.00925001417483542	0.0863239650418533	0.107154649005646	0.914666293057243	0.96114796856511
APEX1	3140.97009180712	0.0151321332584674	0.101520640690925	0.149054745473254	0.881510434767895	0.945209437419486
APEX2	349.468828386736	0.243062243517155	0.0763903251415209	3.18184590871759	0.00146339654717655	0.0160065673426574
APH1A	3698.69410406692	0.153113279588436	0.0675171292328699	2.26776939908598	0.0233432654510137	0.101587269927427
APH1B	864.196766382849	0.225643213740175	0.0992579055757346	2.27330218617204	0.0230079758912348	0.100492937205777
API5	1794.77632991765	0.0327248422105676	0.071895834048926	0.45517021456762	0.648986787067793	0.807119013385663
APIP	330.854549588324	0.220866149820048	0.108436500534161	2.03682476594187	0.0416676055462755	0.147638794666626
APITD1	183.350509543311	0.316539533564582	0.114615675698772	2.76174730580918	0.00574929567071367	0.039962827503198
APLF	28.7396034834306	0.137645370340647	0.188212545250367	0.731329413549696	0.464577968581146	0.667415597269807
APLN	1563.31576473628	1.13250407905684	0.291965157841675	3.87890146697219	0.000104929243115666	0.00275295035297786
APLNR	5139.53112207793	1.11006850724845	0.415714487065828	2.6702665935062	0.00757910445128762	0.0480145481045079
APLP1	6847.9038759523	-0.565352302825702	0.247320602438611	-2.28590864348243	0.0222596036829343	0.098470155942136
APLP2	11976.2867478388	0.260936410461324	0.12147883338755	2.14799898208494	0.0317138363251956	0.123783293483349
APOA1	2.80308459529622	-0.556044628996189	0.39448675514882	-1.40953941225839	0.158675728043323	0.34894300375138
APOA1BP	1608.51282526771	0.443567706303688	0.121253385352376	3.65818822307213	0.000254004484529198	0.00489429515650098
APOA2	0.15508408224813	0.0257641367093	5.23039083411357	0.00492585306269305	0.996069753786434	NA
APOA4	0.034405391471859	0.14596259737724	5.23039083411357	0.0279066329852916	0.977736618147908	NA
APOA5	0.0756194040095069	0.0755638410065619	2.63163380907484	0.0287136609759269	0.977092960977353	NA
APOB	9.22810399865028	2.49098562667086	0.526785781977473	4.72865007350821	2.26017533530894e-06	0.000199227808232967
APOB48R	210.985813403924	0.700549425097917	0.234764654979359	2.98404981431089	0.00284460456162881	0.0248309122462181
APOBEC1	0	NA	NA	NA	NA	NA
APOBEC2	2.30227940327392	-0.500697137976503	0.293668288773459	-1.70497516115112	0.0881990570587822	0.239431679352509
APOBEC3A	2.45826546551388	-0.14410353055643	0.470647342704964	-0.306181545035865	0.75946642301281	0.877963691328599
APOBEC3B	28.2183930451373	0.321483545422132	0.323861326348165	0.992658027579753	0.320876635842615	0.537644769448555
APOBEC3C	135.416871742959	1.00273069720473	0.25768386609593	3.89132122393504	9.96998358773618e-05	0.00264815723596266
APOBEC3D	16.6261918202157	0.266944243589373	0.31756559792082	0.840595597687918	0.400574525812088	0.610641838178447
APOBEC3F	54.1475362125619	0.798450380207284	0.25859950936857	3.08759433518217	0.00201783715617539	0.0198602888573322
APOBEC3G	133.745883352992	0.981185617687633	0.239105142668106	4.10357387858271	4.06816461979369e-05	0.00139340449891676
APOBEC3H	3.38102302621267	0.881376282149943	0.443685194400835	1.98649018103969	0.0469789220333339	0.159804655661
APOBEC4	0.270088114007221	0	3.80978294172348	0	1	1
APOC1	2701.2557145226	0.351254692373931	0.273174927265033	1.28582332167383	0.198504729050314	0.401881562461466
APOC1P1	2.39495870844781	0.474119831422198	0.529501548246157	0.895407828348383	0.370569117419985	0.583422012836337
APOC2	908.639529451756	0.840401443412607	0.286722404006067	2.93106304798848	0.00337804215116003	0.0279154200193749
APOC3	0.182162178617528	-0.185355348366781	5.23039083411357	-0.0354381449198519	0.971730368555291	NA
APOC4	4.09217766304501	-0.0447687745230441	0.39333928922241	-0.113817194848618	0.909382707652923	0.959185226822561
APOD	5088.98141410115	0.505663843446202	0.326426700253883	1.54908848771536	0.121360449953963	0.293022432141623
APOE	66178.9027265267	-0.184174371363388	0.251937002199895	-0.731033431989709	0.464758732644614	0.667621946829801
APOF	0.276851590832369	0.225105212891868	1.59431133523658	0.141192756970811	0.887717667855723	0.948650036035063
APOH	2.08837613106716	0.794157837143143	1.03605248027539	0.766522789397743	0.443365297156201	0.650024179200573
APOL1	356.848474741673	0.729091582797814	0.284207868294099	2.56534622765386	0.0103072897186088	0.059568920466803
APOL2	1520.97997451917	0.564395371245085	0.23095024053374	2.44379642099845	0.014533624976028	0.0750125270720253
APOL3	305.200928956361	0.501556597615725	0.205622385693087	2.43921203387044	0.0147193288356187	0.0756237060348844
APOL4	379.304482855387	0.730284810472233	0.406392152602747	1.79699535484411	0.0723363572028906	0.210614050392224
APOL5	0.0610153417825691	-0.115025898293659	3.33364588899268	-0.0345045341118748	0.972474826804334	NA
APOL6	825.22116478273	0.849854717252927	0.226645671777037	3.74970636142999	0.000177041755832185	0.0038998877636283
APOLD1	1871.7176574649	-0.319116457574727	0.274120640470611	-1.1641460381344	0.244364834151931	0.457366110921675
APOM	89.1125372851556	0.368405497871698	0.159597744572354	2.30833774536632	0.0209803586184988	0.0949820767064061
APOO	405.492711954666	0.300192725226506	0.115515441424094	2.59872378554486	0.00935710318457223	0.0557519647001252
APOOL	131.493074097166	0.00834997992534475	0.221202136175583	0.0377481884655798	0.969888454514138	0.986343976307727
APP	28601.9500926502	0.350426436962683	0.121125588481698	2.89308346283603	0.00381479911122425	0.0304337700168742
APPBP2	1522.53624502883	-0.0041173079727074	0.0870119454142727	-0.0473188819432146	0.962259079323657	0.983479752438217
APPL1	1535.84567876651	-0.0623003893796946	0.0958491314941386	-0.649983869530466	0.515702641057968	0.708593634255703
APPL2	1972.46442775294	0.145453372244565	0.110419853509912	1.317275540775	0.187746280786129	0.387250931532022
APRT	732.459484708871	0.18602425581176	0.135513223599865	1.37273876947272	0.16983357199695	0.364258980397084
APTX	461.815874381404	-0.00180149643593718	0.0810741307984906	-0.0222203607759273	0.982272176049152	0.99215035353261
AQP1	19485.2259556738	1.01874127446142	0.414038611457808	2.46049823922095	0.0138744252811553	0.0727375846663951
AQP10	0.0708322303969896	-0.185400323087173	3.33286053418391	-0.0556279871856594	0.955638168469737	NA
AQP11	68.8874842209461	-0.0494524466147372	0.123190865183342	-0.401429493502932	0.688103938551536	0.83452384319375
AQP12A	0.0245107366878146	0	5.23039083411357	0	1	NA
AQP12B	0.536381116890336	-0.40017370763374	1.10218153807204	-0.363074224899225	0.716549438286264	0.852633139178375
AQP2	0.376416241898645	0.676678108162504	1.3453815590205	0.502963715851107	0.614989782763551	0.783591001994644
AQP3	49.7422238306821	-0.0977443593265217	0.451268445798506	-0.216599144559212	0.828520752456133	0.916941172492995
AQP4	30249.0448733707	0.798048367231466	0.314169821369714	2.5401814972302	0.0110794956285749	0.0624745971756145
AQP5	45.060203457527	1.20566012176588	0.825472124698356	1.46057036414943	0.144133384254476	0.328251765032008
AQP6	86.4985215067764	0.250844968354213	0.263322860729871	0.952613714050225	0.340785826135963	0.55590473491026
AQP7	2.2707359992015	0.0267382893920416	0.405503560425515	0.0659384824241341	0.947426802691101	0.975584307735863
AQP7P1	44.8540816990816	1.0544550155836	0.513156718703353	2.05484012417883	0.0398944492872721	0.143333064352393
AQP7P3	5.9208334592121	0.951590283820978	0.567369717566612	1.67719611103364	0.0935041392791756	0.248883035982297
AQP8	1.42916384667795	0.631369043689948	0.56447873645389	1.11849925057633	0.263353826415715	0.47900292720072
AQP9	18.7631548891878	0.783777677559209	0.490158188915658	1.59903005862884	0.109813923829178	0.275830978949055
AQPEP	4.22936465401829	-0.739926588651879	0.330741608879923	-2.23717418306601	0.0252749580051028	0.106824291408705
AQR	709.36324969735	0.234913504946378	0.12147726606797	1.93380632072291	0.0531369453701256	0.173104365832905
AR	102.214452007265	0.531879582687916	0.334943099626504	1.58796996648391	0.112293130640972	0.279650022538519
ARAF	809.55966122607	-0.0294477748068376	0.089444644753604	-0.329229043146834	0.741982572211839	0.868403571635704
ARAP1	2634.07634683303	0.0596699097703039	0.108099464272063	0.55199080006657	0.580954656457647	0.75948576026328
ARAP2	1468.55954903909	0.141131833132817	0.20807281397637	0.678280984602075	0.497593552949801	0.695075774993745
ARAP3	405.095127722615	0.150717166580216	0.292028567677307	0.516104187268279	0.605781643590882	0.777120595108918
ARC	1347.03554383038	-0.107339458498926	0.402147788297731	-0.266915451539068	0.789534259512101	0.895996816420693
ARCN1	2741.32689407386	0.131739908188033	0.0853864545100712	1.54286659334819	0.122863147763851	0.295759721966475
AREG	3.53196016867759	1.46413479695302	1.0216194769035	1.43315082577592	0.151814739113697	0.33958609761693
ARF1	6425.26129819938	0.109960260719181	0.0673998178515827	1.63146228319664	0.102792812056072	0.264182775525266
ARF3	7482.90437444691	0.0476621924206532	0.11476737233774	0.415293924133697	0.677926748525766	0.827098033023252
ARF4	2809.81604883403	0.457756826947254	0.10262189348087	4.4606156778094	8.17245319741973e-06	0.000474055010954844
ARF5	2498.01000873946	0.101249213267559	0.117986324063463	0.858143637165088	0.390813154122201	0.602072189183736
ARF6	1210.3841104902	0.123137877713269	0.0744839516083873	1.65321354539147	0.0982874106912533	0.257151785108412
ARFGAP1	2294.91132865847	-0.209669192661003	0.145139046525973	-1.44460913640825	0.14856770503351	0.334738061886052
ARFGAP2	2648.5033720344	-0.0510128355520389	0.0962774051582957	-0.529852621891559	0.5962141172463	0.769184706633044
ARFGAP3	958.702116746163	0.0930926813335641	0.08661595978162	1.07477515192666	0.282475407803851	0.49950563311327
ARFGEF1	1029.69632241701	-0.0225543017776251	0.0967526461474968	-0.233113022492859	0.815673642958763	0.910230091749437
ARFGEF2	936.336466778296	0.0437995260430888	0.124120948261442	0.35287779103034	0.724180061320619	0.856798022974792
ARFIP1	644.921488342822	0.355216870288049	0.0781745496496366	4.54389404070843	5.52244253449465e-06	0.000347218747046443
ARFIP2	958.485016886902	0.0986064623487395	0.0910581443391455	1.08289558352387	0.278854772432319	0.495796794816612
ARFRP1	824.91172117732	-0.0687945732954579	0.127039447887613	-0.541521349780409	0.588148286101176	0.764057396378511
ARG1	1.76607398153468	0.548540412631905	0.661829987907269	0.828823750290328	0.407204146847585	0.616731892746493
ARG2	177.966354610068	0.348497735142614	0.153014969048709	2.2775401472759	0.0227539900324353	0.0998550762033879
ARGFX	0.0325941979359651	0.436230865834151	5.23039083411357	0.0834031107176492	0.933531015136775	NA
ARGFXP2	0.537573468033967	-0.799129613005747	0.645481757172351	-1.2380359384694	0.215702735417216	0.422876111758445
ARGLU1	2370.62567264911	-0.652517784155215	0.178791282479707	-3.6496062621469	0.000262642576585678	0.00500300721627507
ARHGAP1	2762.70175883319	0.114299754001505	0.106834265927976	1.06987915355324	0.284673707615689	0.501890557648867
ARHGAP10	152.850592207242	0.343640914084283	0.185252675977155	1.85498488630016	0.0635983848575642	0.194032262726284
ARHGAP11A	190.285936238297	-0.220957057805657	0.284921989742219	-0.775500192194945	0.438044151943532	0.645225257228752
ARHGAP11B	13.3881051569563	-0.255445499809748	0.385641341735756	-0.662391378113141	0.507720427858905	0.70267288030161
ARHGAP12	1667.62484004093	0.114924379447385	0.137671531632699	0.834772287955639	0.403845931656921	0.613859471095077
ARHGAP15	68.8944436186332	0.823968892675644	0.254612715959419	3.23616552131265	0.00121147112898541	0.0141458921048153
ARHGAP17	908.273404309081	-0.0103328469514384	0.0927281499732603	-0.111431609003502	0.911274095777285	0.959848335887251
ARHGAP18	260.226708994172	1.17944723876402	0.22688925755987	5.19833883476302	2.01077353502081e-07	3.76643017778585e-05
ARHGAP19	526.413159625786	-0.0109595097800757	0.113880397676024	-0.0962370171138161	0.923332331836042	0.964467591208432
ARHGAP20	149.895321838103	0.136495050591364	0.291892311845571	0.467621259800699	0.640055458820827	0.800492228440403
ARHGAP21	5342.28613378445	-0.04144797638336	0.12702374339869	-0.326301014868277	0.744196620457931	0.869747539929073
ARHGAP22	459.155329910927	0.0684048803678116	0.24170621944017	0.283008358354403	0.777170429789082	0.888660731811476
ARHGAP23	1978.01157725497	0.0229371782425415	0.184267805622324	0.124477404856895	0.900937289539737	0.956072843936474
ARHGAP24	453.708213941228	-0.0352742427817101	0.196307112710641	-0.179689071346613	0.857396673596061	0.932879953083099
ARHGAP25	300.133250112168	0.348271057197183	0.187457958943088	1.85786220633565	0.0631885845869191	0.19340546860289
ARHGAP26	849.715545958222	0.360370956269373	0.180750922028065	1.9937433913251	0.0461801048014491	0.158169759861561
ARHGAP27	369.462887282651	0.163283210262074	0.167391113094996	0.975459253738337	0.329332503910959	0.54465714019377
ARHGAP28	50.3932715450699	0.0126091273163424	0.313621519804112	0.0402049174566147	0.967929757238228	0.985355123112422
ARHGAP29	392.963347665088	0.427115537880516	0.231862959580545	1.8421033642165	0.0654600318118027	0.197765842076585
ARHGAP30	487.196629638214	0.514292020495706	0.2218636263337	2.31805469420288	0.0204463487436714	0.0933399957117795
ARHGAP31	2454.90635839737	0.00583645258846352	0.145697284295392	0.0400587603035242	0.968046279902602	0.985379948103377
ARHGAP32	1967.26882324965	-0.362030336327849	0.135483514108559	-2.67213571119629	0.00753701599450882	0.0478399652711816
ARHGAP33	1403.6238370528	-0.703351741184347	0.153508660997369	-4.5818375107604	4.60907975010853e-06	0.000316891500407486
ARHGAP36	405.817643962726	0.647668727268137	0.470630602204229	1.3761721491011	0.168768342496042	0.363013437172707
ARHGAP39	721.163344683543	-0.330163304319009	0.134671637084677	-2.45161721848983	0.0142215857702894	0.0739744398353654
ARHGAP4	643.329900079356	0.10960513920538	0.21533352894116	0.509001732077355	0.610751010031498	0.780699659514735
ARHGAP42	287.732245980812	0.358997673956199	0.194058451393761	1.84994609293137	0.0643213195909143	0.195261509620379
ARHGAP5	3168.66030248346	0.302661230875706	0.136936295020515	2.21023382318298	0.0270889387171117	0.111740675059677
ARHGAP6	269.3640970891	0.578025791220511	0.22837592961776	2.53102764458571	0.0113728884670238	0.0636301432526517
ARHGAP8	10.1465977157292	0.214984031046715	0.317686940677872	0.676716614752838	0.498585772744572	0.695706476720174
ARHGAP9	187.913149187457	0.41402652805042	0.216320041993401	1.91395362276719	0.0556260818355924	0.17816773506894
ARHGDIA	5564.17731244339	-0.0761914248777937	0.120077287374741	-0.634519870856286	0.525741603005004	0.716746437091432
ARHGDIB	1858.72022010856	0.527704921404884	0.184592166593259	2.85876118767087	0.00425298828474276	0.0328369408914746
ARHGDIG	352.58977161104	-0.547382494725743	0.363897567797832	-1.50422136107776	0.132524379383729	0.309994369485221
ARHGEF1	1516.05904095814	-0.197460863773696	0.158942847561951	-1.24233878279255	0.214111591834329	0.420961099982525
ARHGEF10	936.360353373321	0.509163189856816	0.142461289302386	3.57404592047509	0.000351507242012387	0.00613074997659237
ARHGEF10L	2768.32133874721	-0.0789576546052283	0.152703197518767	-0.517066151123159	0.605109981496955	0.77653041344772
ARHGEF11	1510.48508236031	-0.304534005162403	0.0971686955790554	-3.13407526310402	0.00172396631757263	0.0178985925650064
ARHGEF12	4057.64973896586	0.166880995181585	0.11593338964101	1.43945584355237	0.150021412098665	0.337168482984401
ARHGEF15	93.3842041183852	-0.133485855966882	0.222756106499569	-0.599246674151851	0.549008402345882	0.73581026910068
ARHGEF16	17.7919450157367	0.106438981331589	0.329223635035521	0.323302977078498	0.746465799586352	0.871202567023517
ARHGEF17	2455.67722297511	-0.236559743249792	0.154277479597306	-1.53333943403314	0.125192243199734	0.299402436124168
ARHGEF18	1307.90768957952	-0.121149546787911	0.0650756507220192	-1.86167246034035	0.0626492727226912	0.192508411158481
ARHGEF19	38.3720270632303	0.14578352771733	0.253443606575741	0.575210910572972	0.565148664732544	0.747297837283668
ARHGEF2	2757.17818794588	-0.436679968963135	0.113560428553004	-3.84535330244298	0.000120378865786623	0.00299363211236842
ARHGEF3	921.610523806201	0.363484065000531	0.151354726306003	2.40153759232898	0.0163263314719378	0.0813917639391143
ARHGEF33	15.913821881206	-0.423419808587529	0.211588019204348	-2.00115209821307	0.0453760013494178	0.156372414002535
ARHGEF35	11.3272664272845	0.797284449188572	0.350259128946016	2.27627029047815	0.022829837146416	0.100103909184797
ARHGEF37	728.353261601262	0.10494733884443	0.22072712825995	0.475461895743207	0.634457786402086	0.796983577721433
ARHGEF38	0	NA	NA	NA	NA	NA
ARHGEF4	3024.14289469336	-0.191743479047255	0.167885729354793	-1.14210707356813	0.25340951556692	0.467508967777198
ARHGEF5	16.3173875210041	0.943714924997869	0.397978411517549	2.37127165114145	0.0177269967812057	0.0855520279440798
ARHGEF6	4156.85647989215	0.0310026170525289	0.13355377683184	0.232135831632564	0.816432515272824	0.910681067529057
ARHGEF7	2900.57000615123	-0.386328178923329	0.142830841799998	-2.7047952252798	0.00683465071857741	0.0447074169594249
ARHGEF9	1879.55266492034	-0.048424422725654	0.131802050812109	-0.367402649862296	0.713318695295899	0.85045104954964
ARID1A	2988.76204644435	-0.126122319119056	0.0985747756943131	-1.27945834246856	0.200735700123089	0.404359515885025
ARID1B	1466.32376559604	-0.159010752302781	0.104361908678271	-1.52364741423983	0.127596812130898	0.302801052929676
ARID2	641.384941025651	-0.119023201574118	0.113326328471067	-1.05026963442573	0.293594162022368	0.511471635485975
ARID3A	46.6140129587572	-0.179919543242306	0.17560501830682	-1.02456948541156	0.305566368821938	0.523001979478437
ARID3B	88.5890040259744	-0.213081108237992	0.12284439733922	-1.73456106141816	0.0828185814838237	0.229482317799654
ARID3C	0.633824795535992	-0.384497179129837	0.633775970995036	-0.606676801782453	0.544065420354975	0.731522684972571
ARID4A	708.63406169568	-0.211690721469124	0.117760213549838	-1.79764213300728	0.0722337370106936	0.210417472691769
ARID4B	1025.62526045429	-0.101224522338939	0.0866963605465537	-1.16757522116034	0.24297815003835	0.455935833662696
ARID5A	700.360832627053	0.523799409645132	0.235743226182213	2.22190651297981	0.0262896241716639	0.109442255109305
ARID5B	1141.13730636226	0.293647940694794	0.164795296561091	1.78189515612745	0.0747663306036841	0.215180562886595
ARIH1	1184.36270163251	0.043191051432851	0.0748186531084266	0.57727651646253	0.563752674912212	0.746330015480483
ARIH2	1733.88210590283	-0.329060302314237	0.0772815057564063	-4.25794372267338	2.06315867821992e-05	0.000866815872704454
ARL1	1219.12474950889	0.374598612086397	0.0887495026585512	4.22085308497561	2.43379522136467e-05	0.000959747931372357
ARL10	118.697720005074	-0.452160544575256	0.195430466210237	-2.31366456491404	0.020686129069637	0.0941021047188492
ARL11	55.4057889923961	0.48815276813566	0.223313275305832	2.1859549884221	0.0288188985934938	0.116324596208239
ARL13A	0.221719712858517	-0.267525283871969	0.848746850499819	-0.315200325885659	0.752609558145283	NA
ARL13B	277.867210884661	0.326616027313103	0.119196297875118	2.7401524471448	0.00614106929573888	0.0416084054543996
ARL14	0.00997247288730896	-0.0446294284288794	5.23039083411357	-0.00853271387250798	0.993191961951849	NA
ARL15	181.49665837884	0.235145065745833	0.189161954934411	1.24308857892363	0.213835193971922	0.420746294045878
ARL16	604.106456091113	0.00950822541505646	0.105872460363001	0.0898082974784566	0.92843955440409	0.96703364438536
ARL17A	60.114425689645	-0.0764473873403037	0.145267807463536	-0.526251401980394	0.59871354409803	0.77106367004612
ARL17B	2.32498652193688	-0.154252514662395	0.33968479301775	-0.454104857894933	0.649753356970307	0.807565998413053
ARL2	1663.8973964245	0.339995199298518	0.157894511908706	2.15330599644339	0.0312946378375409	0.122735044186404
ARL2BP	2023.34750863303	0.139896804546394	0.0886575107429027	1.57794645229867	0.114577912048689	0.283013738249936
ARL3	1583.13698538605	-0.0432825248468799	0.153833478435314	-0.281359592769527	0.778434607048306	0.889484088704495
ARL4A	586.090835895561	-0.27736164692608	0.207409177260991	-1.33726795790268	0.181135186163214	0.378917277522908
ARL4C	1223.08447696791	0.352851876196395	0.323769078755098	1.08982574109029	0.275789912671181	0.492135973965781
ARL4D	141.531243802986	-0.127656640174577	0.203546985895282	-0.627160552700355	0.530553998042354	0.720175656369594
ARL5A	993.385950983689	0.175479514817448	0.0922360553253823	1.90250454877332	0.0571052247444611	0.181354091020516
ARL5B	158.356045358946	-0.0373068361873091	0.238291054000259	-0.156559952885468	0.875591666209853	0.941748035504378
ARL5C	1.07530947136744	-1.25831004071936	0.54067965519054	-2.32727462304074	0.0199506535279472	0.0920712014665353
ARL6	78.5487186492421	0.258643757840617	0.135830262380906	1.90416887449799	0.0568881940090509	0.180991419793127
ARL6IP1	7515.9497899472	0.250646985178184	0.10111849881459	2.47874511703115	0.0131845484803199	0.0701433582168973
ARL6IP4	1901.48516246561	0.11059486922345	0.14826194244358	0.745942400326616	0.45570221057123	0.660362410386965
ARL6IP5	3333.99021063754	0.428301821847315	0.0997896665654018	4.29204582587324	1.77034399329917e-05	0.000786471042365348
ARL6IP6	542.813863924455	-0.207646432101902	0.102020317690621	-2.03534390798111	0.0418162810529001	0.147940636775091
ARL8A	2907.34404355602	0.0385059808557077	0.107876126322157	0.35694626947129	0.721132030187478	0.85486163668213
ARL8B	2577.38052088768	0.358943224673779	0.0952588031839869	3.76808455151909	0.00016450498738985	0.00372091658269721
ARL9	5.85416267148794	0.300033101306295	0.633842648449393	0.473355811636032	0.635959350014944	0.797822102423174
ARMC1	689.202594104918	-0.00811751565855502	0.108698516690315	-0.0746791759972404	0.940469976545686	0.9718712210933
ARMC10	557.12853784884	0.313370714243451	0.0834330919967496	3.75595230553915	0.000172683580355481	0.00385260067239735
ARMC2	46.8912422065848	0.781841198066757	0.222110531798757	3.52005459504795	0.00043145797866298	0.00709184403319717
ARMC3	56.6622684808621	2.6512874699933	0.649917523216771	4.07942142700005	4.5147926151205e-05	0.00150618148818861
ARMC4	29.5888442086589	1.03585073106986	0.441782128161758	2.34470945074217	0.0190419119392987	0.0894289305834872
ARMC5	611.677561231397	-0.324484315532811	0.132546313577901	-2.44808253638909	0.0143618752058582	0.0744251411964673
ARMC6	866.628546764886	-0.187689652058965	0.104190805427482	-1.80140321680879	0.0716393495022444	0.209228322681397
ARMC7	302.51621627876	-0.0175765909485838	0.089792098194573	-0.195747635950065	0.844807697494935	0.92642109790515
ARMC8	800.263123323978	-0.034493293810149	0.0749764877826491	-0.460054809584337	0.645476879741307	0.805088801519607
ARMC9	202.250422872344	0.164906049113601	0.148626527942317	1.1095330786278	0.267200282668568	0.482894018386552
ARMCX1	804.754963548306	-0.123096078542224	0.0898058818641569	-1.37069060496976	0.170471424784706	0.365060993268856
ARMCX2	935.716443612252	0.173352621830803	0.175975282901091	0.985096423616708	0.324576709930146	0.540825141465563
ARMCX3	2605.81175120476	0.00231129546231396	0.105867580086804	0.0218319476124689	0.982582009746288	0.99215035353261
ARMCX5	187.126002963878	-0.0345054357464775	0.121844373995516	-0.283192687647174	0.777029133435134	0.888660731811476
ARMCX6	288.499370436496	-0.0851317419683836	0.102189895299289	-0.833073971932876	0.404803011847528	0.614950389375876
ARMS2	0.355379667902991	0.574045476511416	0.764789899422778	0.750592387457882	0.452898003944061	0.658421206801044
ARNT	788.533920887726	0.0942322608869932	0.0800145866689182	1.17768852917912	0.238920801582546	0.451052373129379
ARNT2	7700.3781039696	0.148696537452368	0.136337339991677	1.09065159597103	0.275426216965561	0.49177978686076
ARNTL	376.28170810548	0.140254544121541	0.18510583589935	0.757699201865272	0.448631076929543	0.654705731646408
ARNTL2	46.1444309221486	0.192473576552784	0.344789153582022	0.558235589934232	0.57668352107931	0.75626626867329
ARPC1A	2026.16081186498	0.0709602470674618	0.0818427565233264	0.867031489185449	0.385924756546313	0.597384146122239
ARPC1B	1396.06022501625	0.408667900952161	0.195240325408652	2.09315314393576	0.0363354859434482	0.135108500462177
ARPC2	3061.07118637159	0.233650652944786	0.0766481812645664	3.04835221253711	0.00230100061575944	0.0216972171329766
ARPC3	2492.25387393638	0.342157177698329	0.0913350158134757	3.74617746163292	0.000179549597676329	0.00393739129928749
ARPC4	2943.37100668619	0.226485541551236	0.100727387503267	2.24850010672511	0.0245443182949754	0.10487152511202
ARPC5	2347.78710682909	0.306087902631375	0.119868687012376	2.55352678218434	0.0106638077153904	0.0609912819141697
ARPC5L	659.208112652522	-0.0724786971840525	0.106446778580417	-0.680891410248711	0.495940203688739	0.694082235665872
ARPM1	15.3637132513074	0.592280267134128	0.293107886658314	2.02069031265805	0.0433118332743816	0.151323327738284
ARPP19	5838.76616254044	-0.0411492342431838	0.0896866559128358	-0.45881111102164	0.646369815111984	0.80567374628714
ARPP21	691.846260567712	-0.890091835031995	0.244912677068197	-3.63432324405218	0.00027871125485194	0.00523150916988266
ARR3	0.0252456432062698	0.145961053081266	5.23039083411357	0.0279063377308789	0.977736853635132	NA
ARRB1	470.903708182512	0.292547881528511	0.230167699387403	1.27102057459468	0.203721329199425	0.408305499516725
ARRB2	1728.1736363764	0.00424309548157486	0.130278234582462	0.032569488642319	0.974017901452238	0.988084728867998
ARRDC1	446.174856381972	-0.172386670154679	0.101200155585304	-1.7034229755642	0.0884889410692365	0.240018047501273
ARRDC2	1027.04012753835	-0.414368057880087	0.269819450400113	-1.53572345235165	0.124606220629138	0.298362559643349
ARRDC3	1087.7943973505	0.167081606981983	0.145609602767318	1.14746283079267	0.251190386461257	0.464957391201463
ARRDC4	1247.49358336157	0.890134405762048	0.233533553643653	3.81159106207196	0.000138075170803815	0.0032755510836335
ARRDC5	3.71602891044244	0.148722899250914	0.312097427436153	0.476527155230522	0.633698865988346	0.796531036502337
ARSA	559.450095984911	0.293753906479813	0.165324164326562	1.77683587681451	0.0755952471323067	0.216595559900118
ARSB	451.804263878832	-0.00726097459100159	0.106816321189629	-0.0679762653322548	0.945804528093166	0.974650038557714
ARSD	393.487743161655	0.90572139217906	0.260174901834775	3.48120201369093	0.000499168859751813	0.00774378712683676
ARSE	56.6282964811204	0.816899330074736	0.297290994321554	2.74781054817681	0.00599946639056549	0.0410667699410539
ARSF	54.8216235673061	1.6519392557022	0.581636938177114	2.84015533965136	0.00450915702167206	0.0340974186558903
ARSG	137.960511753825	0.446505052718479	0.230637020183834	1.93596436670307	0.0528720653456735	0.172549088756062
ARSH	0.0154660613673919	0.0755856451368781	5.23039083411357	0.0144512422750313	0.988469978224284	NA
ARSI	74.4215476037121	0.559013560059963	0.371980926190484	1.50280167799169	0.132890193108596	0.310382056433145
ARSJ	116.27456365481	-0.187483554371619	0.403623495210908	-0.464501092221235	0.64228877717736	0.802280966324207
ARSK	158.224371050311	0.487386233791238	0.134302391893805	3.62902124763811	0.000284497826407597	0.00531190638748833
ART1	0.488846449959087	-0.63992781625603	0.735140274106614	-0.870483959042657	0.384035981662081	0.596006568706138
ART3	41.3312418922501	0.529831149254988	0.413881794734702	1.28015089331148	0.200492072631516	0.404085233138301
ART4	0.172122982813313	-0.167826015653656	1.70627282280122	-0.0983582539737893	0.921647822392855	NA
ART5	2.17750566397146	0.100713162659571	0.427223572804466	0.235738777236588	0.813635377867134	0.909535705881313
ARTN	11.80045307165	-0.0903121173876627	0.320420808338593	-0.281854720534344	0.778054910193964	0.889170312000157
ARV1	353.354847856967	0.22083266017114	0.0815298013811906	2.70861275791219	0.00675651488056875	0.0444063050374223
ARVCF	1069.0981344612	-0.171231858281224	0.145839662014554	-1.17411036144705	0.240350823772356	0.452681242252376
ARX	75.0097969535014	0.0209589442550813	0.444544163030255	0.0471470463411639	0.962396031445259	0.983509866574767
AS3MT	251.790003435035	0.248747305264217	0.246917983268798	1.00740862196913	0.313738449702053	0.531128299994569
ASAH1	4991.11030067181	0.601535240561227	0.131791687918178	4.56428815855736	5.0119199323705e-06	0.000333793867495875
ASAH2	3.41577756715184	-0.283831314368767	0.398592643643154	-0.712083674637183	0.476412962933772	0.677811369528847
ASAH2B	6.35397957963148	-0.0121649678562352	0.439552075586188	-0.027675828489746	0.977920702388368	0.990229624450169
ASAM	11.1681307353769	-1.11353837406186	0.437399682657856	-2.54581431631466	0.0109023163631572	0.0619156429616726
ASAP1	1893.48216395837	-0.0760601589486475	0.129218302976677	-0.588617534795948	0.55611786847384	0.740913648284551
ASAP1IT1	0.0196540780244776	0	5.23039083411357	0	1	NA
ASAP2	898.973994600581	0.158068195333014	0.143430330394283	1.10205557568257	0.270437511046451	0.486884994356956
ASAP3	1571.13775536644	0.195573707010741	0.138434724692749	1.41275035902162	0.157729138809826	0.34788242046833
ASB1	1017.88089060797	-0.292157210700988	0.115428248705792	-2.53107202072907	0.0113714496747923	0.0636301432526517
ASB10	0.0731354659436738	-0.0446209113930545	5.23039083411357	-0.0085310854978616	0.993193261159551	NA
ASB11	0.0792837690691598	0.145947969195439	3.62233311433143	0.0402911506448727	0.967861008814198	NA
ASB12	1.07945355615671	0.585979119378891	0.638241423123208	0.918115149141254	0.358558584558338	0.572331061792868
ASB13	842.473138547738	-0.304580486071721	0.143022623874218	-2.12959654788313	0.0332049363102091	0.127610849482834
ASB14	10.7296749896787	-0.116664255380169	0.152948686322207	-0.762767292648724	0.445602190382013	0.651925684439781
ASB15	0.00486125918343224	0	5.23039083411357	0	1	NA
ASB16	12.9116710046977	-0.406540897161716	0.200541253254131	-2.02721829331812	0.0426400931345615	0.149873759723551
ASB17	0	NA	NA	NA	NA	NA
ASB18	0.00496815227201238	0	5.23039083411357	0	1	NA
ASB2	23.0890517051619	-0.0140342593328497	0.43693305879467	-0.032119930159473	0.974376409640716	0.988225414447792
ASB3	906.222757173308	0.271003896214226	0.122528723200942	2.21175810156603	0.0269833835384594	0.111466851088577
ASB4	4.82120099699996	-0.371150403666873	0.456968449189995	-0.812201376976375	0.416676089558164	0.624962002038111
ASB5	23.3269210850969	2.9380752672345	0.596261803592042	4.92749200021658	8.32918326568472e-07	0.000100520384888284
ASB6	989.273065986126	0.100466775383763	0.0785421741182674	1.27914431337847	0.200846241326322	0.404415759279084
ASB7	361.77505570515	0.12120884747482	0.0810314618913117	1.49582451859746	0.134699390226556	0.313272694948363
ASB8	800.904875662771	-0.00626195677540143	0.0665905573042402	-0.0940367077390819	0.925079997360776	0.965342880254264
ASB9	9.51575094747626	0.225797716039142	0.287553370358468	0.785237591747436	0.432314278783498	0.640143999172449
ASCC1	917.161667409087	0.212454415387444	0.121927588913518	1.74246384498045	0.0814273126201796	0.226973721374115
ASCC2	1069.26039829582	0.202754701497689	0.0956962775421771	2.11873133109412	0.0341131789316727	0.12935959163841
ASCC3	926.910408036719	0.259673548564195	0.145891353470828	1.77991047712172	0.0750906127804531	0.215941052137871
ASCL1	1522.44235613151	0.0206891217413321	0.229364638832706	0.0902018804931059	0.928126790003499	0.966875232201956
ASCL2	13.5345458213945	1.01916246497177	0.283128906487419	3.59964115856555	0.000318656615614886	0.00572426532319349
ASCL3	0.0200332236567184	-0.0446278841329055	5.23039083411357	-0.00853241861809529	0.993192197522211	NA
ASCL4	0.718023106442463	0.0394030498979982	0.637209034708225	0.0618369290950821	0.950692694581602	0.977289088671512
ASF1A	742.667767260605	0.0831815210112811	0.113365700066818	0.733745047772422	0.463104137765261	0.666194727265814
ASF1B	139.34820041669	-0.175542702560148	0.33401698305842	-0.525550230867889	0.599200744115937	0.771559454399769
ASFMR1	0.363821828339865	-0.528500423817304	0.686064720573794	-0.770336103823105	0.441100545223589	0.648360190766254
ASGR1	111.834731588101	-0.423597808489285	0.228245823461637	-1.85588416061634	0.0634700711357436	0.193739402336266
ASGR2	9.7048623644909	0.698340164711055	0.356051300494623	1.96134704111719	0.0498385532940853	0.165686238738074
ASH1L	2529.54285639344	0.0694303936991951	0.125681029128435	0.552433363894906	0.58065147719732	0.75936544457907
ASH2L	1012.66566737149	0.0126343272809611	0.0671863009695948	0.188049157322692	0.850838116529832	0.929342830069819
ASIP	8.93648324651136	0.188684113917985	0.434929930246072	0.433826464440451	0.664414462339033	0.817185497173066
ASL	315.606260342125	0.401821531303917	0.153913943129133	2.61068960442909	0.00903598664434587	0.0543428467687717
ASMT	0.581996708700825	-1.68501975983702	0.706456614415866	-2.3851709014435	0.0170711887649834	0.0836666171394348
ASMTL	1132.12288799647	0.00702812320514503	0.115660958501998	0.0607648708446733	0.951546467604832	0.977554340523817
ASNA1	1821.60194372459	0.241910354490175	0.0791850375324058	3.05500081869854	0.00225059907769149	0.021345080493169
ASNS	895.804490696019	-0.212662973158773	0.163534634929957	-1.30041549455171	0.193458602195375	0.394891361041496
ASNSD1	1033.61420916115	0.073574906691319	0.0653197708589048	1.12638035504206	0.260004558400295	0.475142476540052
ASPA	139.847687218362	-0.0947579908200595	0.291435735852834	-0.325141975272069	0.745073621655599	0.870390038628662
ASPDH	52.964461546161	-0.169007604900177	0.336392387990118	-0.502412096510169	0.615377671788684	0.783742199372184
ASPG	0.291189650407168	-0.378952431856641	1.09274357315559	-0.346789897617347	0.728749167244367	0.859979493725437
ASPH	2923.17266780128	0.401791929464012	0.126090944890916	3.18652485165853	0.00143993116556258	0.0158441103102307
ASPHD1	405.885706336321	-0.53119215653134	0.277652902888532	-1.91315182015077	0.0557286193958643	0.17821661639275
ASPHD2	213.85496107664	-0.089978936440705	0.192733701579443	-0.466856266980461	0.640602716104421	0.80095383402793
ASPM	181.821730057884	0.23537903447285	0.445525864099656	0.528317328890697	0.597279106132811	0.770243322323595
ASPN	28.5295149390301	0.459199863192637	0.395360378207171	1.16147163070553	0.245450153630002	0.458469373904092
ASPRV1	153.17618338087	0.016535561402361	0.139497747090075	0.118536404689631	0.905642651645577	0.957910990078416
ASPSCR1	557.277246275657	-0.0843228467786143	0.142597318713433	-0.59133543000252	0.554295694860655	0.739197952016041
ASRGL1	1148.89340259464	0.387534990791378	0.155219399559121	2.49669172727195	0.0125357881642131	0.0679074511357807
ASS1	300.98934700728	0.420003546052078	0.310849178036097	1.35114896782293	0.176647718073771	0.373088943669549
ASTE1	166.401923650145	0.134879925803418	0.0862572128964761	1.56369445840196	0.117889339779125	0.287949756575418
ASTL	0.11744077228341	-0.176620966631026	1.74899959958465	-0.100983994892263	0.919563165447131	NA
ASTN1	4081.33567629708	0.0152308097976006	0.161331294109597	0.0944070391405517	0.92478582435615	0.965236225460034
ASTN2	1991.67427090057	0.535499158533638	0.188924763104007	2.83445721850044	0.00459036037159956	0.0345805865949323
ASXL1	1714.52898572212	-0.179516528563249	0.0874628537231644	-2.05248881006616	0.0401221814388338	0.143949933486255
ASXL2	406.957724130465	0.260728866899328	0.246635490074496	1.05714253378772	0.290446541876301	0.508145350021795
ASXL3	168.669637989382	-0.649080595273898	0.255564612209875	-2.53979058235519	0.0110918861770995	0.0625052639412735
ASZ1	0	NA	NA	NA	NA	NA
ATAD1	1021.93643241004	0.0899668145239286	0.120621210630101	0.74586230774803	0.455750596385844	0.660379308961341
ATAD2	596.309914944301	-0.207010252954138	0.199611858407042	-1.03706390294714	0.299706076578114	0.51738023318674
ATAD2B	290.12410457654	-0.36171156244205	0.11965076763019	-3.02306094316093	0.00250231844679853	0.0229340929206581
ATAD3A	806.182835026699	-0.192377405826766	0.132550001325001	-1.45135725314006	0.146680406375487	0.331941488477725
ATAD3B	323.897294465289	-0.351029612987325	0.217401951552279	-1.61465713845219	0.106384964323329	0.2699956264804
ATAD3C	39.3153215992323	-0.82250445499961	0.341987105244133	-2.40507446739096	0.0161691705807078	0.0808102537794872
ATAD5	66.9127318047038	-0.349564209055664	0.239744933419141	-1.458067138564	0.144822038102167	0.329310810464489
ATCAY	2844.58445648933	-0.759062319006272	0.272185649698206	-2.78876685764993	0.00529091381119525	0.0379350925649574
ATE1	194.533048866296	-0.217907001865207	0.203636106725185	-1.07008037704866	0.284583130960907	0.501801712192492
ATF1	221.632207581079	0.0518248541982479	0.0886762960104077	0.584427367062843	0.558932818868467	0.742902649781416
ATF2	496.089800809273	0.0172718018014413	0.170256703106833	0.10144564934165	0.919196700423007	0.962961100840012
ATF3	456.933760211646	0.941530958559528	0.322839108703115	2.91640923660635	0.00354085728516727	0.0288237644644083
ATF4	4824.90326412755	-0.128909798184412	0.11755472928501	-1.09659389263593	0.272818958468876	0.489018192901448
ATF5	499.145032097802	0.0936338737515755	0.18578744440844	0.503983862040367	0.614272717466887	0.783060542002663
ATF6	1051.26620721222	0.194421947271755	0.12708189530198	1.52989492964169	0.126042738619763	0.300756439206552
ATF6B	1808.14010846381	-0.0237290746580166	0.0784196601949028	-0.302590888548111	0.762201659028928	0.879976961294759
ATF7	1154.11517657606	0.0775617883227243	0.107002442168595	0.724859982172337	0.468537933245271	0.671042381010008
ATF7IP	1127.98434912882	0.13711660695346	0.20614655826886	0.66514138341631	0.505960067729557	0.701282461073536
ATF7IP2	33.6998455874496	0.42465294677714	0.256386425571923	1.65630042943914	0.0976609935831488	0.256071739080225
ATG10	69.148994369399	0.344392357425705	0.117681931535094	2.92646758030993	0.00342835235881309	0.0282532686141966
ATG12	569.036977931963	-0.102244585984815	0.0656333968428983	-1.5578134136429	0.119277485327533	0.290079488931526
ATG16L1	443.564432137696	-0.0703511688081085	0.0891499697220391	-0.789132840173211	0.430034369662947	0.637895796011647
ATG16L2	457.32390667655	-0.266805122132917	0.186128812907235	-1.43344341999264	0.151731157375538	0.33949393875506
ATG2A	1016.7348491332	-0.0430134603711697	0.0771619029646589	-0.557444266127942	0.577223928416827	0.756699036290105
ATG2B	836.932110814033	-0.0771686314424863	0.104422791492858	-0.73900180544172	0.459905901046333	0.663581932020562
ATG3	900.18090455466	0.173031689230655	0.0744857350299073	2.32301781221841	0.0201781955726406	0.092730010134693
ATG4A	189.877414509618	0.203954004442814	0.0838742457735591	2.43166424403317	0.0150296323667728	0.0767356187448347
ATG4B	1422.46213604082	-0.108996170528144	0.112963693400626	-0.964877893480249	0.334605975174652	0.549432841007186
ATG4C	301.828794498395	0.227496215734124	0.104352838199912	2.18006735282373	0.0292524693351713	0.117703715279716
ATG4D	350.861232897461	-0.269091513426908	0.123835855145743	-2.1729693157948	0.0297826267719372	0.119090770427613
ATG5	528.693072391049	0.220630615596469	0.0811534998521158	2.71868269388898	0.00655424493425153	0.0434581240441412
ATG7	813.327286852339	0.274169682693935	0.0870086115537321	3.15106376021897	0.00162676973389424	0.0172073960911096
ATG9A	2246.02896945279	-0.0458188927906751	0.0753529064313083	-0.608057405621687	0.543149401045181	0.730766185320794
ATG9B	32.2269534785393	-0.158440731915116	0.36721699542924	-0.431463504922791	0.666131383189313	0.81840553685137
ATHL1	341.771181891049	0.0503388213682911	0.291182775781499	0.172877057144564	0.862748065854346	0.934968704887173
ATIC	1408.9279642909	0.219351356702185	0.106836068128065	2.05315826897756	0.0400572302363891	0.143802977462717
ATL1	738.083558781805	-0.0264168027231054	0.168638627997648	-0.156647400638683	0.875522743357299	0.941748035504378
ATL2	451.434145169046	0.0677447762463999	0.10187990603396	0.664947376608478	0.506084151869467	0.701282461073536
ATL3	217.352163106266	0.335131970827582	0.196992039961199	1.70124625793809	0.088896754908258	0.240742662943014
ATM	1464.87799301447	-0.236485607473545	0.125162532046704	-1.88942811883433	0.0588344860604868	0.184821225521065
ATMIN	1754.91814146878	0.142313830448494	0.084369612547047	1.68679013867861	0.091643712317176	0.245265252997092
ATN1	9148.02485003697	0.230295318306703	0.121423918675375	1.8966223526552	0.0578777982961053	0.182813730715012
ATOH1	0.092764781396874	-0.0446498105324009	3.29279153710379	-0.0135598655515475	0.98918112417524	NA
ATOH7	11.0170128768816	-1.0052839064365	0.365954109040966	-2.7470217756838	0.00601391414448569	0.0411187088008144
ATOH8	1116.20606971188	-0.234212150298437	0.256333878529679	-0.913699553261821	0.360874738833954	0.574524086207362
ATOX1	806.350179163716	0.504380448703456	0.145299813793363	3.47130829376532	0.000517928999484666	0.0078860281699689
ATP10A	495.688723830452	-0.439672088959916	0.228668245328765	-1.92275096320341	0.0545113331533299	0.176140663569304
ATP10B	271.360873688781	0.465609578190259	0.321278878750965	1.44923805760406	0.147271112735245	0.332775716160491
ATP10D	399.917535341513	0.258022478808918	0.160392065529067	1.60869852232284	0.107682279081035	0.272073511092616
ATP11A	1330.9061756214	-0.0534172241628682	0.155810633835363	-0.342834265210111	0.731723146510476	0.86145381828934
ATP11B	510.079509577932	-0.229385965295305	0.125602445699617	-1.82628581806352	0.0678072203252073	0.201905851281318
ATP11C	238.730527554481	0.038587718865976	0.127537521517465	0.302559736200393	0.762225402850399	0.879976961294759
ATP12A	1.02012880664951	0.38493429589388	0.976772949179363	0.394087793091817	0.693516222996358	0.837330258477815
ATP13A1	1528.83262251514	-0.127782367839447	0.104706666233517	-1.22038426430718	0.222319239698341	0.431442323360194
ATP13A2	2025.22205690721	-0.326956539019396	0.105901064564377	-3.08737726447159	0.00201931140345073	0.0198639265081242
ATP13A3	1078.97343482923	0.044326462394321	0.124894113462464	0.35491234266732	0.722655261545978	0.855927039476688
ATP13A4	778.949816601165	0.223589155838538	0.234402633153558	0.953867935826745	0.340150495743268	0.555296070309164
ATP13A5	45.1808606998761	0.0570570933138531	0.340724869739805	0.167457965006854	0.867009719511645	0.937271178084549
ATP1A1	8178.82439697805	0.287779439516372	0.146333369316048	1.96660160878843	0.0492291578626023	0.164508646963661
ATP1A2	25609.0543124473	0.627368684603446	0.333291773498361	1.88234074312228	0.0597897659411072	0.186656175547394
ATP1A3	5412.34797940938	-0.53170351280222	0.286942371797428	-1.85299755303335	0.0638827093825049	0.194536643542117
ATP1A4	9.47971818937159	-1.19867337367345	0.535413958328779	-2.23877871509915	0.0251703178668484	0.1066225337766
ATP1B1	3471.1761751971	0.118272420852828	0.252271792859266	0.468829350726532	0.639191618638944	0.799689952436199
ATP1B2	16890.6644913009	0.270058527125171	0.201666771261696	1.33913249781108	0.180527542614962	0.378085985476618
ATP1B3	1604.03820531051	0.262926293441683	0.10782543874501	2.43844399338326	0.014750644241539	0.0757196930492018
ATP1B4	1.83385408056463	0.177475551887404	0.916747305092054	0.193592662778085	0.846494843761446	0.927142314219063
ATP2A1	17.2249924588951	-0.149958126937268	0.291962399620263	-0.513621367451113	0.607516737531087	0.778643333876266
ATP2A2	7534.30145004326	0.00151844917774883	0.132789949826223	0.0114349706414978	0.990876412303537	0.996027706749522
ATP2A3	87.7472656112095	0.268996837593386	0.290139115275829	0.927130550245377	0.353858756001469	0.568100235270004
ATP2B1	1403.37372661121	0.297021386586333	0.237705055204432	1.24953752595159	0.211468537092758	0.417938853703641
ATP2B2	1651.50393068526	-0.0156814267932717	0.247409877963642	-0.0633823795652013	0.949462018106334	0.976728707165119
ATP2B3	181.238102938696	-0.23387285202117	0.462426507163066	-0.505751397029451	0.613031182112044	0.782531888744146
ATP2B4	5687.92624466203	0.271514863409153	0.172528014992151	1.57374362315305	0.115546732334544	0.284663836256989
ATP2C1	2441.4859918767	0.0638483631741282	0.0831683759577073	0.767700011439399	0.442665429388966	0.649604080721265
ATP2C2	27.8800447167349	0.142064473478174	0.350828007857333	0.404940513004723	0.685521237952104	0.832570775419068
ATP4A	0.335992037094324	-0.773616413738779	1.80834457880106	-0.427803651365875	0.668794078331991	0.820344823776661
ATP4B	0.203607338238844	0.365853807654122	1.34957010878135	0.27108914555353	0.786322469704543	NA
ATP5A1	9589.91490530899	0.0659802057668745	0.0919821269054309	0.717315504507852	0.473179442587244	0.674919553757841
ATP5B	9991.49130147571	-0.027798828199033	0.108824999536634	-0.255445240683644	0.798379232440982	0.901221303060499
ATP5C1	2363.52805150434	0.0782456806819397	0.118227214637956	0.661824613914394	0.508083629615315	0.702875720113233
ATP5D	1479.2876245986	-0.0839716204584821	0.185298105741798	-0.453170420292862	0.650426030367454	0.808030906099889
ATP5E	3434.82254914775	0.271118829906455	0.123110895733978	2.20223261548107	0.0276488812880735	0.113323405557692
ATP5EP2	33.1094669201536	0.668775592036017	0.170627727470255	3.91950125546038	8.8732399079067e-05	0.00244721779177881
ATP5F1	2824.76903702574	0.20278468223053	0.0733882469727695	2.76317653841455	0.00572417969275147	0.0398623661681249
ATP5G1	933.598696826988	0.110225790567868	0.111578829562026	0.987873694324736	0.3232145100679	0.539586704973692
ATP5G2	3906.59328289832	-0.00498575743171227	0.104831637608447	-0.0475596637184514	0.962067179318674	0.983451311381297
ATP5G3	2142.7764179531	0.179845124164451	0.117702915976065	1.52795810259299	0.126522940731683	0.301410199090423
ATP5H	1667.08594907382	0.410489743483066	0.103718674876903	3.95772259884973	7.56677607683013e-05	0.0021632077490232
ATP5I	1472.73587406022	0.112968171723297	0.148035370405827	0.763116081066331	0.44539417040435	0.651833480280867
ATP5J	1558.24923320902	0.212442043144434	0.0966114072256911	2.19893332728458	0.0278826634405356	0.113951223358451
ATP5J2	1610.73967822715	0.292427824780936	0.130875760070751	2.23439256148618	0.0254572547145597	0.107256877759422
ATP5L	2134.31414746868	0.20000414507571	0.0942887094294688	2.12118870102173	0.0339059257359439	0.128849192029901
ATP5L2	0.238386720552309	1.01682301928721	1.04948854949232	0.968874810286486	0.332607654970879	NA
ATP5O	2591.95692013754	0.295735774029703	0.0998568717744443	2.96159662098876	0.00306048451014677	0.0260699348467357
ATP5S	180.626456931284	0.00316732716272532	0.100324966021693	0.0315706776520657	0.974814427572423	0.988446658204991
ATP5SL	693.864873377232	0.0783602988121127	0.0894349176372491	0.87617119669014	0.380936972442822	0.593141230213078
ATP6AP1	3782.13510528051	-0.0591464944944561	0.0888192749062909	-0.665919582847966	0.505462502804094	0.701044943031152
ATP6AP1L	77.7690039939977	-0.0530763938877235	0.162914623507243	-0.325792692792637	0.744581207682876	0.870093563670505
ATP6AP2	3414.62241553547	0.32253852178281	0.0940805364702698	3.42832358194231	0.000607321113417294	0.00872377900874725
ATP6V0A1	3885.0014714543	-0.236172091965284	0.0970333636319218	-2.4339266735219	0.0149360204834405	0.0764530373849209
ATP6V0A2	566.936251382787	-0.305288271177519	0.103798990452102	-2.94114875152271	0.00326997463000096	0.0273873701894165
ATP6V0A4	5.56620031793951	1.97623444011547	0.629566706862238	3.13903899074496	0.00169502892286536	0.0177247776155917
ATP6V0B	2156.10558416412	0.0108234472486255	0.107208326651537	0.100957151246332	0.919584474676047	0.962961100840012
ATP6V0C	3804.16607745885	-0.270957543763194	0.125065890301252	-2.16651832974223	0.030271600725211	0.120336539306617
ATP6V0D1	2637.84961893204	-0.0970120299379473	0.0943478744751453	-1.02823757798067	0.303838085937199	0.521507941757439
ATP6V0D2	1.2335457773556	-0.670019808851619	1.07498127518893	-0.623285097439362	0.533097189109856	0.722392890322037
ATP6V0E1	2381.66060195146	0.476146736842903	0.106931774559941	4.45280870725658	8.47542578088468e-06	0.000485366580865822
ATP6V0E2	6856.62953783577	0.0350666253476386	0.136787412371488	0.256358569401141	0.797673975931949	0.90082104096014
ATP6V1A	2393.07081178579	-0.00433018768150272	0.144922204031807	-0.0298793943304391	0.976163239453749	0.989256502020814
ATP6V1B1	51.4405126393781	-0.405104023439938	0.29638403125554	-1.36682135580598	0.171681307226086	0.366778337476473
ATP6V1B2	3643.09236648306	0.0608155044930277	0.141031430119559	0.431219512143296	0.666308767660324	0.81852467960568
ATP6V1C1	1921.73204765433	-0.0110856613918574	0.120801632889187	-0.0917674796832122	0.926882782457941	0.966158842627018
ATP6V1C2	30.789251171646	0.0471315385668995	0.148590655823005	0.317190460637313	0.751099087804465	0.87371674205196
ATP6V1D	1444.46489638519	0.18414987940611	0.10347206234777	1.77970628233137	0.0751240417912514	0.215981895059789
ATP6V1E1	2580.14551528304	0.220480605344179	0.112085844187922	1.96706914188489	0.0491752401999391	0.164423423070901
ATP6V1E2	76.9617637242409	0.353743712488429	0.148963286430615	2.37470400233951	0.0175630279930616	0.0850116741241542
ATP6V1F	2392.70344356184	0.273791905923327	0.110823711342274	2.47051738844708	0.0134917759585187	0.0712299222801187
ATP6V1G1	1695.41390683351	0.00748427968841511	0.070973284137591	0.105452069456246	0.916017100890984	0.961568320788333
ATP6V1G2	2039.31253577154	-0.0594778552917808	0.223993809748993	-0.265533477726155	0.790598523657552	0.896446915786876
ATP6V1G3	0	NA	NA	NA	NA	NA
ATP6V1H	1381.41949483118	0.00843419787871043	0.118692720162772	0.0710591000622784	0.943350719268319	0.973673093438349
ATP7A	229.84123771067	0.253848417226774	0.149022362883197	1.70342499149432	0.0884885640794942	0.240018047501273
ATP7B	144.757326355641	-0.411772829618312	0.15323514415228	-2.68719575979976	0.00720547099163741	0.0463000838151661
ATP8A1	1682.56460069466	-0.569885757316629	0.227617919861675	-2.50369460217786	0.012290407069431	0.0670193100845459
ATP8A2	65.8835955089247	-0.281588552600353	0.510736087401243	-0.551338665010237	0.581401537899445	0.759830012536869
ATP8B1	39.5536058836392	0.624057150031793	0.280701532686606	2.22320535288467	0.0262019560578341	0.109267877574829
ATP8B2	762.489548850537	0.206120313955301	0.105075662553512	1.96163706177279	0.0498047541570709	0.16567572706824
ATP8B3	26.1226286138623	-0.0162553476226662	0.21334240889524	-0.0761937005719675	0.939264994337473	0.971634595921436
ATP8B4	170.711121999577	0.354356447819153	0.226131064690734	1.56704010704494	0.11710531719451	0.286970266256703
ATP8B5P	32.377854945639	0.402421392977616	0.156872011384463	2.56528484224861	0.0103091135854016	0.059568920466803
ATP9A	6794.72207340362	0.165703629059994	0.169710495835332	0.976389988399859	0.328871240880371	0.544299522544709
ATP9B	448.706511209998	-0.024212685019381	0.0850887513484894	-0.284558001329877	0.775982791534846	0.887923802569495
ATPAF1	1933.25053242258	0.256427075381881	0.101015750659508	2.53848606487334	0.0111333236587885	0.0626602272401674
ATPAF2	346.212663752966	0.0957042457807623	0.0783992577903491	1.22072897726518	0.222188652461829	0.431442323360194
ATPBD4	137.111630045112	0.339939809217114	0.117880605422941	2.88376368612505	0.00392953510680169	0.0310644288401067
ATPIF1	1446.78967996199	0.0966643358616879	0.117347226344799	0.823746234765374	0.410083762796499	0.619674472487954
ATR	458.99456705793	0.0426784463843288	0.105736311130301	0.403630937452843	0.686484132085186	0.833322152929275
ATRIP	197.076747831283	-0.0944498780317094	0.123092482524453	-0.767308255505746	0.442898261205372	0.649767196948275
ATRN	2417.19764536175	-0.00206854050530056	0.09709452468191	-0.0213043991108384	0.983002834653602	0.992237234248745
ATRNL1	662.003826524467	0.168161616052681	0.273925490565602	0.613895463709714	0.539284408018306	0.727215014997014
ATRX	1281.40849920285	0.304097576037946	0.206754732403556	1.47081313449402	0.141341659380267	0.323771429168913
ATXN1	1347.69091751579	0.0482695932130177	0.10521503488034	0.458770871177435	0.646398714537445	0.80567374628714
ATXN10	2984.58183184717	-0.0384250601918911	0.0815882093033353	-0.470963396794643	0.637666874011247	0.799061026374233
ATXN1L	1152.4942950627	0.0255593745638292	0.097362547915536	0.262517519426489	0.792922480309582	0.897558647700678
ATXN2	1097.90029707708	-0.0505980818609992	0.0866135383526161	-0.58418213622687	0.559097778795662	0.742957157722702
ATXN2L	2587.10398460308	-0.326891083216742	0.0937078121851449	-3.48840801630158	0.000485905976308029	0.00760449196342121
ATXN3	267.379513727786	-0.168460738297961	0.0848772434432356	-1.98475741510885	0.0471714674961806	0.160183289560953
ATXN3L	0	NA	NA	NA	NA	NA
ATXN7	430.819221346429	-0.03993432729294	0.0923485522933097	-0.432430463729458	0.665428581041439	0.817946321982853
ATXN7L1	157.512456792486	0.212346067721186	0.146298510655173	1.45145748080572	0.146652513780798	0.331920138805074
ATXN7L2	291.611716850387	-0.365081808559896	0.199238615700819	-1.83238478783707	0.0668941128363864	0.20014807604391
ATXN7L3	1418.38029702547	-0.140988348653841	0.104663885182895	-1.34705823701721	0.177961477199263	0.37475601103942
ATXN7L3B	3316.67146841837	-0.0969729142885879	0.107225039588393	-0.904386835955854	0.365790315985916	0.579068708694317
ATXN8OS	0.0619084492273274	-0.607629419307507	4.56373833702587	-0.133142913645547	0.894080357062122	NA
AUH	184.940096397911	-0.00238233196069468	0.103865981048725	-0.0229365951839138	0.981700849331532	0.992063740612961
AUP1	2135.17962153741	0.0884506337657861	0.0926128051450665	0.955058359664618	0.339548185069923	0.554854250367655
AURKA	105.576937308676	0.214666693378785	0.26129456586838	0.821550546469908	0.411332744980394	0.620461497742212
AURKAIP1	1449.87468762774	0.0688425888337391	0.157634612050195	0.436722544232975	0.66231257758561	0.816012659824901
AURKAPS1	4.57573553371773	0.341323385937218	0.314156700696691	1.08647495081366	0.277268917379631	0.493941913247525
AURKB	96.5252756693642	-0.379025233834254	0.456545515968584	-0.830202511200078	0.406424295681372	0.616008233727447
AURKC	21.5273306922776	0.592950330813144	0.327044013015919	1.81305973267972	0.0698226089307465	0.205827894064374
AUTS2	1132.13406358835	-0.0332577157937141	0.166197304835845	-0.200109838282655	0.841394679149601	0.924927198952691
AVEN	136.155411904463	0.234922480976537	0.119247586554892	1.9700397111886	0.0488338195353257	0.163667712680719
AVIL	109.243398110769	-0.443960991736125	0.36186165798535	-1.22688044433295	0.21986752962972	0.428627267758199
AVL9	268.237817244064	-0.240490212581097	0.18037400457472	-1.33328642976086	0.182437825249673	0.380535549662409
AVP	0.276334218393913	-1.89108340194161	3.23942014653142	-0.583772192676666	0.55937358913308	0.743104010031845
AVPI1	166.253165343442	0.151934726373794	0.169134019867581	0.898309674734556	0.369020476085885	0.582421169071049
AVPR1A	5.16802461273423	-0.129603633457773	0.503377592108507	-0.257468022990257	0.796817497368286	0.900306141230067
AVPR1B	0.103367715224576	0.104882527970531	2.44144838107941	0.0429591421155341	0.965734103634171	NA
AVPR2	1.05861425277612	0.633390741426121	0.673323064676802	0.940693664979605	0.346861866372308	0.56161264911821
AWAT1	0.0049629279255739	0	5.23039083411357	0	1	NA
AWAT2	0.72378291641401	-1.73028877440202	0.94611809612466	-1.82882959483531	0.067425139998164	0.201101155655496
AXIN1	854.44268621663	-0.364173396076388	0.0949597125482971	-3.83503052298276	0.000125548702219274	0.00307996829919097
AXIN2	520.343093671228	0.0664048650868975	0.167323502542218	0.396865138955255	0.691466912681205	0.836530839892684
AXL	1575.81719686869	0.505813965717981	0.190151683422735	2.66005515498637	0.00781278563298076	0.0491222067315594
AZGP1	480.358143858059	-0.187913685928465	0.447223831002337	-0.420178158903798	0.674355308971695	0.824298631359461
AZI1	466.243166496681	-0.283548299306623	0.157387794315548	-1.80159014579069	0.0716099127999524	0.20917632423144
AZI2	827.858813105444	0.0972844847991866	0.0735572098258772	1.32256899125831	0.18597875197662	0.385195797977836
AZIN1	4595.78540111021	-0.0141524550061358	0.11054671400471	-0.128022394275174	0.898131250797485	0.954813342495715
AZU1	2.42005417171159	-2.27844414625437	0.652590006017384	-3.49138682058468	0.000480520003010295	0.00755967689775252
B2M	26553.6380364789	0.802273688551785	0.18251460825118	4.39566835903721	1.10432431284658e-05	0.000582344861982617
B3GALNT1	652.465524572037	0.260947852871572	0.167584784676789	1.55710945581871	0.119444500399893	0.290328603161783
B3GALNT2	345.69307130278	0.211554989840858	0.126786663504905	1.66859024437277	0.0951986135805392	0.251227101468338
B3GALT1	36.9435899458665	-0.616812260429646	0.332209089152117	-1.85669893019456	0.0633539998062681	0.193516498134247
B3GALT2	280.362251794681	-0.199965450659491	0.230394460352871	-0.867926469903944	0.385434587206145	0.597335581068767
B3GALT4	129.877407981991	0.572190282537645	0.197882647619622	2.89156370920169	0.00383329863539195	0.0305136680219646
B3GALT5	13.2277218370267	0.40869092576364	0.304596774279512	1.34174410326685	0.179678981691577	0.37683467708665
B3GALT6	717.703948377979	-0.271657446515988	0.145967657956432	-1.86107970984279	0.0627329210794265	0.192655078942046
B3GALTL	648.328862307554	0.42336797303871	0.177334109242902	2.38740293588305	0.0169678827351977	0.0834183116854154
B3GAT1	3454.48882585938	-0.48844482709513	0.162995096481684	-2.99668418031225	0.00272933309535186	0.0241757870220361
B3GAT2	760.117555219545	0.600315741783083	0.377322188109851	1.59098977134181	0.111611877748221	0.278711954682475
B3GAT3	1111.2934608282	0.156189169390534	0.131393195455816	1.1887158147627	0.234551515215737	0.446412504933253
B3GNT1	3695.51141233993	0.0801954062614605	0.121575086564171	0.659636842776424	0.509486905284941	0.704074777763073
B3GNT2	244.918818606493	-0.0179016615128507	0.120954403536842	-0.148003387965929	0.882340094481177	0.945488324829303
B3GNT3	0.144391818318862	0.676676052152783	2.29525569134959	0.294815106963052	0.768135125402214	NA
B3GNT4	12.2711129742559	-0.524482580521022	0.488577564298451	-1.0734888763755	0.28305182691397	0.500180616309651
B3GNT5	313.259464608629	0.602960736035218	0.263019021168992	2.29246057321386	0.0218790801407611	0.097215127030187
B3GNT6	0.412848407264146	-1.0006012092174	0.728681504197213	-1.37316674494127	0.169700515357935	0.364180750742824
B3GNT7	152.669646708119	1.98344713763405	0.411282023007119	4.82259623975765	1.41701621625829e-06	0.000149886974122097
B3GNT8	7.0983896040495	0.678974605117826	0.327021018335566	2.07624148616989	0.0378716220851921	0.138754586050514
B3GNT9	492.007294903885	0.784527549366898	0.237428812433034	3.30426430275041	0.000952260102843121	0.011982003218109
B3GNTL1	78.1990476253374	-0.0645360322057414	0.161814123462685	-0.398828179053379	0.690019812220376	0.836057965322201
B4GALNT1	573.113251635859	-0.381872723085224	0.280618063583957	-1.36082730458645	0.17356827095944	0.369317790603793
B4GALNT2	0.136928911030512	1.10769081379976	5.23039083411357	0.211779740545428	0.832278874729013	NA
B4GALNT3	27.5007757975455	0.336335389949747	0.404703006427939	0.831067189044059	0.405935674009228	0.615578958511885
B4GALNT4	1587.9753274317	-0.523324258290667	0.202440159905248	-2.58508123356359	0.00973560568873713	0.0573233993106978
B4GALT1	583.581182302861	0.248929911178296	0.184973723706265	1.34575823090199	0.178380500021091	0.375118483379634
B4GALT2	1628.213314124	-0.114849787844459	0.120566742492968	-0.952582656458163	0.340801568104254	0.55590473491026
B4GALT3	633.721664039531	0.0237713590493737	0.091567913467848	0.259603589828663	0.795169566967675	0.899288496947263
B4GALT4	537.431865501409	0.397173640180261	0.103666094894334	3.83127811060208	0.00012747931004013	0.00310614221292903
B4GALT5	2351.06068233353	0.283620091636776	0.154637785517338	1.83409307555672	0.066640179123935	0.199853852736257
B4GALT6	274.539090950142	0.00962526551048016	0.238602402345449	0.0403401869212727	0.967821915309631	0.985301119917216
B4GALT7	516.784031407525	0.188388289631301	0.0995472449171289	1.89245106469928	0.0584309077910914	0.184043542459171
B9D1	199.181101575637	0.564991052054752	0.139694299842615	4.04448179124912	5.24389835688196e-05	0.00166895186289294
B9D2	95.7409084371324	0.377958391235999	0.181066427578649	2.08740182423839	0.0368518272175509	0.136267644874769
BAALC	11173.1850981035	0.354154876673682	0.173453927145488	2.04178067629813	0.0411732918934645	0.14658050580643
BAAT	10.3568098108615	-0.243624699370851	0.334982411615911	-0.727276092483893	0.467056840624433	0.66954062780888
BACE1	3381.22161087965	-0.0236726424229743	0.111611380947973	-0.212098822018958	0.832029938691273	0.919488592751813
BACE2	196.144752342071	0.370426675426073	0.236750715202316	1.56462748215786	0.117670281109509	0.287766489176009
BACH1	722.526154655191	0.0655944323154453	0.119962020990456	0.546793324869574	0.584520729531298	0.761829068502957
BACH2	229.295521561052	-0.244910493067632	0.157549295344277	-1.55450072012352	0.12006502502469	0.291046955918136
BAD	1400.68247738147	-0.0267584830733226	0.149789590978483	-0.178640470933433	0.858220014395923	0.9330982706855
BAG1	1397.40957704036	-0.108240785474401	0.125762225019476	-0.860678041102075	0.389415390483849	0.600863870918188
BAG2	126.350811851107	0.109295736487808	0.168692319844109	0.647899896028519	0.517049697997369	0.709685342293618
BAG3	1887.1320672656	0.519147255336884	0.221881413480156	2.33975098316792	0.019296601161025	0.0903153258921268
BAG4	151.625376657236	0.0394102991187713	0.191394213357889	0.205911654419132	0.836859921615972	0.922084259221717
BAG5	1075.6875010138	0.0214054101358538	0.089411723783836	0.239402722931548	0.810793318796386	0.907995606813017
BAGE	0.00939327604181608	0	5.23039083411357	0	1	NA
BAGE2	4.1250067603504	0.108944216142925	0.340800546094328	0.31967148348633	0.749217379213359	0.872566509910273
BAHCC1	969.450835366687	-0.718908753408906	0.150538526953413	-4.77557983300437	1.79190184599498e-06	0.000174172859430712
BAHD1	872.42381671877	-0.174259868751102	0.0835716475818153	-2.08515535822725	0.0370552006323218	0.136818192867025
BAI1	2745.93947524283	-0.992566146183092	0.318004095406423	-3.1212369919782	0.00180093036937351	0.018374736823894
BAI2	3378.74858789581	-0.354052821171831	0.165738364196202	-2.13621525039731	0.0326618729636602	0.126198066100674
BAI3	935.098414195232	-0.268947277908972	0.167737211858711	-1.60338469281052	0.108849748418727	0.274171765297659
BAIAP2	1584.58896204441	-0.143607921807807	0.16126044086001	-0.890534101494074	0.373179165876798	0.585456967439939
BAIAP2L1	12.0202970079583	-0.33111057848371	0.256224347742235	-1.29226820714482	0.196264278090176	0.398782400973734
BAIAP2L2	35.2207895320533	-0.396949905063705	0.260632459747525	-1.52302558725122	0.127752304012523	0.302946318179243
BAIAP3	2023.85969264953	0.280095688688653	0.31647639161799	0.885044496547311	0.376132632939883	0.588640198556994
BAK1	235.871679881799	0.103149429517996	0.090950671268382	1.13412499412586	0.256742120756433	0.471624968376972
BAMBI	437.947910590425	0.456497152416421	0.258392520160487	1.76668098648092	0.0772816693673998	0.219627873839803
BANF1	2450.00056883401	0.19769720993249	0.124503020689938	1.58789087073505	0.112311018214759	0.279650022538519
BANF2	0.0893637887711308	0.26616419136116	3.03560488523286	0.0876807758005509	0.930130399455944	NA
BANK1	21.0286224244208	1.54672313299577	0.505672477954799	3.05874493951404	0.00222266297856389	0.0211582454634917
BANP	246.56439482934	-0.18468404408821	0.0990270460542268	-1.86498589473302	0.0621833813609821	0.191469445827599
BAP1	2440.58907487935	-0.145417100819177	0.0828953491031454	-1.75422508491081	0.0793919465487124	0.22359060028801
BARD1	104.79090210333	0.106041643529061	0.266957152233162	0.397223459427841	0.691202684166201	0.83645695300394
BARHL1	2.56868114364836	-1.95979773810533	0.872162710227106	-2.24705518262184	0.0246365006657027	0.105054198475377
BARHL2	0.441274118874676	0.0345130168979858	2.00967025036452	0.0171734725593544	0.986298224899382	0.993647525359443
BARX1	2.26673128752387	-3.01874140865279	0.956679423789814	-3.15543674671529	0.00160258011291558	0.0170216158242457
BARX2	8.45431040508389	1.38748225613437	0.601976942765046	2.30487608007257	0.0211735146142685	0.095370361401479
BASE	0	NA	NA	NA	NA	NA
BASP1	2303.28069172613	-0.262893453355126	0.232464341635265	-1.13089797560266	0.258098035469286	0.473100802630856
BAT1	5088.90409759711	-0.149124665037624	0.0901949747938145	-1.65335890806026	0.0982578406195431	0.257149249020612
BAT2	9210.21611253907	-0.207161760802008	0.0853378622910521	-2.42754804538535	0.0152012732588708	0.0772609654440404
BAT2L1	7421.77844494434	-0.174413783730156	0.10524594291083	-1.65720196813599	0.0974786487821397	0.255668182963891
BAT2L2	3173.07947120131	-0.0481297043508898	0.103444451176195	-0.465271010708068	0.641737391923269	0.801926461540252
BAT3	4535.65831537029	-0.0645187775297283	0.0791056279048407	-0.815602874770687	0.414727304733037	0.623612155028822
BAT4	602.349600456916	0.192380889658147	0.122228867020159	1.57393989119132	0.115501346457488	0.284630013978148
BAT5	1085.98575844195	0.0482567527291104	0.0671070547125557	0.719101038420058	0.472078667558358	0.674098197413991
BATF	18.2333327492977	1.09787424516748	0.394331498440291	2.78414037303622	0.00536698011670578	0.0382214005776647
BATF2	122.616546352365	0.511829735841645	0.280451238878313	1.82502219597513	0.0679976799207532	0.202305473251983
BATF3	81.1120437378228	0.647505732513112	0.289690189223892	2.23516624518021	0.0254064366251359	0.107164829860213
BAX	744.711894506872	0.140315901203765	0.137781897514644	1.01839141233232	0.308491981689395	0.525535393588645
BAZ1A	559.376870574128	-0.292640969147664	0.169202343237129	-1.72953260308896	0.0837138165797727	0.230768891618532
BAZ1B	2589.64108940157	0.0366202048556254	0.0971904205785475	0.376788212641076	0.706331001210313	0.846129109570571
BAZ2A	1739.49282979184	-0.374988145445597	0.0989263898415651	-3.79057747933749	0.000150297438984104	0.00347831215934642
BAZ2B	1117.67470716163	-0.218132866374417	0.128627248420419	-1.69585269881112	0.0899137794562376	0.242330572869015
BBC3	125.96491746835	0.20734019402068	0.172503172950685	1.2019500306812	0.229382888800485	0.439693327620757
BBOX1	1212.6538922812	0.666367762544865	0.235851947563418	2.82536468080547	0.00472268313568602	0.0352671462399942
BBS1	1380.65259716167	0.162692130945631	0.120178310898511	1.35375617887509	0.17581417842738	0.372027601374575
BBS10	624.789641474127	-0.00720435184848509	0.11671293646711	-0.0617271064079112	0.950780153332894	0.977302430389397
BBS12	123.862411422856	0.606797464177055	0.122224954851351	4.96459552728032	6.88443943052887e-07	8.71802745350494e-05
BBS2	2819.45631169845	0.0887951289952111	0.108594613902913	0.817675258504046	0.413542641654896	0.62259911103804
BBS4	494.5875253567	0.225450060752686	0.0947433807542808	2.37958640443068	0.0173320791523321	0.0844233762978855
BBS5	342.138864270443	0.184103186654267	0.122159335764015	1.50707422812051	0.131791631871966	0.308778778413251
BBS7	290.235629359124	0.114391176269304	0.109290240795275	1.04667329339665	0.295250285212432	0.513258382769749
BBS9	410.647235352637	0.177785898978802	0.0891654836051069	1.99388700414809	0.0461644044974091	0.158154792652301
BBX	1999.25027361775	0.146539743254253	0.130946125939971	1.11908422034135	0.263104211014182	0.478926543087924
BCAM	775.745000910049	0.220384232879467	0.214345555269028	1.0281726280858	0.303868631575557	0.521507941757439
BCAN	70896.2274966923	-0.703076478168208	0.228805111679044	-3.07281805467024	0.00212047731479147	0.0205222944427235
BCAP29	1591.48576304474	0.277105294590821	0.117266246592552	2.36304395035034	0.0181255198917674	0.0867997599717072
BCAP31	3381.91935112437	0.154358618165035	0.101284027722825	1.52401737604131	0.127504370647566	0.302664427798856
BCAR1	2139.69186373365	-0.639924596916996	0.145505835285192	-4.39793081605794	1.09287801763136e-05	0.000579708923688706
BCAR3	423.247994925729	0.64108548535738	0.223416421030647	2.86946448430233	0.00411167505262874	0.032076416831397
BCAR4	0.087947076006819	-0.226466482158312	2.29788745380709	-0.0985542097734626	0.921492228252461	NA
BCAS1	2588.01990961705	0.279453508462096	0.325075242364926	0.85965792543618	0.389977634222276	0.601370192829514
BCAS2	723.42059263187	0.172710222498269	0.0651987828409572	2.6489792442839	0.00807352898392487	0.0502520589092894
BCAS3	785.189136262484	0.244017473544425	0.0934760808501632	2.610480363801	0.00904151625053026	0.054357922172195
BCAS4	550.0548780154	0.179969938329174	0.18418281376102	0.977126663743378	0.32850644881153	0.544123941429398
BCAT1	874.767871604181	0.285044657071525	0.376265927550842	0.757561703572029	0.448713413733453	0.65477275060902
BCAT2	344.207036951393	-0.407179042881833	0.161262260502125	-2.52494936889756	0.0115714959305254	0.0641821837824516
BCCIP	1033.91840741672	-0.000435837484334876	0.109412525904607	-0.00398343316481761	0.996821688584241	0.99909969366935
BCDIN3D	198.179277059209	-0.136230849271985	0.0866730074609619	-1.5717794185617	0.116001716281872	0.285354700708704
BCHE	1649.18455836705	-0.152232807276183	0.182644047632769	-0.833494489687763	0.404565904248548	0.614694050713763
BCKDHA	1178.01697516377	-0.16680757876549	0.125152023244163	-1.33283964926448	0.182584431076429	0.38066472343378
BCKDHB	660.981169088327	0.90768133534662	0.159568146499963	5.68836171413966	1.2826391629676e-08	5.12542609521852e-06
BCKDK	943.445728986428	0.0698446840675662	0.084012659402678	0.831359042365225	0.405770829547078	0.615484694805193
BCL10	230.516298896576	0.127751630228062	0.0832740602919027	1.53411073964991	0.125002411660168	0.299107567062295
BCL11A	118.727798492075	-0.501395198501859	0.407802090162365	-1.22950620067256	0.218882074458102	0.427097649711242
BCL11B	107.253513413481	-0.641371346831137	0.280982479343962	-2.28260263176769	0.0224537858028228	0.0990345784415893
BCL2	757.229321927676	0.650027928989716	0.158937737726803	4.08982749022793	4.31694145496416e-05	0.00146190661474888
BCL2A1	59.9962106691709	0.768694412342442	0.425588582595533	1.80619134013044	0.070888457142665	0.207866610655693
BCL2L1	2770.04957284665	-0.0192023916460038	0.11453651813357	-0.16765300673459	0.866856267981988	0.937271178084549
BCL2L10	0.473338800573483	-1.3003083581535	0.77622691764001	-1.67516524949544	0.0939018136501179	0.24936705437657
BCL2L11	463.987046554067	-0.21788779990287	0.15184129774295	-1.43497061169571	0.151295472287369	0.338888288823053
BCL2L12	76.3464431492141	0.377387861136571	0.18120688497946	2.08263533242321	0.0372844760657444	0.13734728940671
BCL2L13	1327.06436045675	0.322322601920102	0.0896251936662773	3.5963392516649	0.000322726858786892	0.00576192006053152
BCL2L14	2.49248801230192	0.898307439819302	0.422302194487287	2.12716734969831	0.0334061809280147	0.127967556854594
BCL2L15	11.7259089948141	-0.281019623944702	0.225998026652534	-1.24346052090429	0.213698180298971	0.420650127659324
BCL2L2	1563.01997710291	0.0018374974666713	0.146909383681199	0.0125076929779977	0.990020565083369	0.995556973567227
BCL3	146.993115703549	0.269786822625817	0.204691842842133	1.31801452798433	0.187498784628161	0.387006788932919
BCL6	2873.06578203332	-0.0935579482012124	0.156128050674364	-0.599238559612495	0.549013812730721	0.73581026910068
BCL6B	148.669733962851	-0.0427992540048654	0.242231863919888	-0.176687134847875	0.859754146787259	0.933431146847377
BCL7A	1083.92531441418	-0.734567378265339	0.189087071315682	-3.88481017318722	0.000102409872836504	0.00270019696971558
BCL7B	1038.24659878853	0.0801573879309501	0.0925129604919929	0.866444955438301	0.386246199881607	0.597603284461773
BCL7C	634.243224637919	0.285037304488217	0.183552180077338	1.5528952277664	0.12044816709271	0.291629521333439
BCL8	2.19670342990649	-0.488921312806618	0.465407616792174	-1.05052280015637	0.293477813885431	0.511318481667262
BCL9	864.097143633095	-0.00656804641531075	0.108139560757058	-0.0607367587710689	0.95156885644138	0.977554340523817
BCL9L	1407.27313277338	-0.311617074193423	0.123964069219815	-2.51376932166417	0.0119448535447427	0.0656857359148512
BCLAF1	2980.98571283172	0.120860851708212	0.0876625853210166	1.3787050800022	0.167985702598713	0.361762743009587
BCMO1	52.149747536047	1.4544838106414	0.297567961873625	4.88790460331582	1.01914890486862e-06	0.000118201944445534
BCO2	64.2546466998086	0.33620299007134	0.285469274322255	1.17772040745728	0.238908088398327	0.451052373129379
BCOR	639.58425319791	-0.291719830626958	0.15081593773604	-1.93427720575215	0.0530790542581318	0.173004813063209
BCORL1	342.562999134563	-0.0311002986981449	0.132974125032836	-0.233882333803401	0.81507632847156	0.909886824577967
BCORL2	1.2997959109138	0.931883937822052	0.762990999486149	1.22135639666739	0.221951108845631	0.43119326266877
BCR	4494.29257199547	-0.303843504365813	0.164390016668258	-1.84830873871723	0.0645576922802786	0.195796326966431
BCS1L	436.89309038707	-0.0473032081515512	0.100521064897929	-0.470580054037269	0.637940654089696	0.799087160414477
BCYRN1	0	NA	NA	NA	NA	NA
BDH1	289.27989768344	0.521981073051963	0.291332572231332	1.79170172787094	0.0731807576227837	0.212076774145511
BDH2	1220.31937530298	0.67192992337159	0.169972300451259	3.95317308518908	7.71216076728115e-05	0.00219362237627801
BDKRB1	1.18377992370202	2.55763296791619	0.596352619952717	4.2887930434832	1.79646665165603e-05	0.000793711629731663
BDKRB2	43.2829561007508	1.8685276834967	0.403248785228389	4.63368459359008	3.59214157083508e-06	0.000270267321032454
BDNF	62.5229669280347	-0.767770621572516	0.498347815584355	-1.5406320597036	0.123406360632304	0.296313683654706
BDNFOS	260.484990890085	0.053612904946382	0.159419396595301	0.336301015380723	0.736643884312659	0.864643711338974
BDP1	726.039999233271	-0.296348101472485	0.125161293180224	-2.36772962265388	0.0178976100290673	0.0860751065907161
BEAN	48.8632283676597	-0.742008380092346	0.33546935632469	-2.21185144366563	0.0269769312187757	0.11146580357905
BECN1	1359.94074364267	0.137196483252365	0.0611615781954012	2.24318088741996	0.0248851522658998	0.105763367536141
BEGAIN	166.874035489797	-0.58184661224942	0.35787364180019	-1.62584371769486	0.1039829055919	0.266015166930368
BEND2	0.118950531547124	0.195788396583889	2.80332434373832	0.0698415069313027	0.944319810064978	NA
BEND3	124.840864039381	-0.4255273539083	0.154252061266115	-2.75864938475073	0.00580407705210476	0.0401765914256772
BEND4	26.4053407920004	-0.588275023134103	0.41124998007744	-1.4304560526017	0.152586170502182	0.340676001734571
BEND5	249.279158767679	-0.0918602835981697	0.130557362057083	-0.703600947130093	0.481681321365062	0.682283853547581
BEND6	470.056623272556	0.338761995655042	0.147403890809031	2.29818896771134	0.0215510363326955	0.0963767061264684
BEND7	368.314371655344	-0.334202299015024	0.16030166835941	-2.08483356683297	0.0370844106347392	0.136818192867025
BEST1	414.370480450455	0.0691206975077424	0.242189595853784	0.285399119908819	0.775338381722784	0.887795833064571
BEST2	0.360322127918864	-0.0270763648098256	0.75346849144541	-0.0359356298468219	0.971333685695867	0.987114799115386
BEST3	606.14992560575	-0.951241604458798	0.320037016817474	-2.97228618713602	0.00295591013236558	0.0254565019158036
BEST4	14.3779391938481	0.441464655813721	0.382731401790307	1.15345815302501	0.24872238426131	0.462324365700525
BET1	339.819739656481	0.350172268537321	0.0922930747559066	3.79413373607331	0.000148159806366218	0.00343917844803977
BET1L	928.431789252126	0.0618072240519401	0.0892861632555269	0.692237428492193	0.488788237375628	0.688434907813013
BET3L	0.19324582598564	-0.126773584290649	1.27753976005666	-0.099232593970325	0.920953596320608	NA
BEX1	2640.28807022478	-0.386538224014421	0.179125848074161	-2.15791427183857	0.0309344976685327	0.121994223861452
BEX2	873.219004008368	0.0871179947753926	0.248589384143368	0.350449376893542	0.726001475497422	0.858141500103724
BEX4	2644.97846248457	0.041652174438624	0.105700469767788	0.394058555559207	0.69353780835105	0.837330258477815
BEX5	164.187525583187	-0.0896325572584645	0.368619859207787	-0.243157157758935	0.807883654096056	0.906430640042134
BEYLA	0	NA	NA	NA	NA	NA
BFAR	783.983650069885	0.0921308832610352	0.0652714319385416	1.41150393862638	0.15809607508938	0.348392600766816
BFSP1	16.459086596705	0.220919157952531	0.306413297427847	0.720984238631329	0.470919212119928	0.673009668568898
BFSP2	0.170109127606581	0.324800577221835	1.62023460316344	0.200465152754839	0.841116808883416	NA
BGLAP	60.2881193772669	-0.0365702333861363	0.189388187559842	-0.193096696564462	0.846883239731896	0.927142314219063
BGN	2395.43525236817	0.718281961848846	0.279145264866681	2.57314757673534	0.0100778225448689	0.0587040508590321
BHLHA15	0.904688468228021	0.430972569009206	0.74054707280648	0.581965123939971	0.560590172816398	0.743977093917572
BHLHB9	285.770658563578	0.2354154562562	0.183744150771537	1.28121333532358	0.2001187434103	0.403725007532992
BHLHE22	23.4138905120169	-0.107208171540954	0.521043163543841	-0.205756795294625	0.836980891377766	0.922133431082353
BHLHE23	0.0403872967167414	-0.114999361137681	5.23039083411357	-0.0219867625164136	0.982458514968301	NA
BHLHE40	1362.29752241365	0.81606467741233	0.26302698864876	3.10258913583231	0.00191835767593975	0.0191876981460565
BHLHE41	2428.38474165758	0.76651512975186	0.209593332661019	3.65715416621371	0.000255031005059081	0.00489953796257735
BHMT	2.72876063921394	0.517636031953764	0.514082929752188	1.00691153507721	0.313977288246947	0.531181791210798
BHMT2	47.7576442996407	0.680088600134691	0.355186303141415	1.91473768588401	0.0555259649262293	0.178011749207248
BICC1	25.1036098814354	0.987154161823166	0.372773242092487	2.64813578432287	0.00809370092948791	0.0502907980630165
BICD1	241.746157635237	0.843003015846139	0.233666953638906	3.60771175691733	0.000308909396012965	0.00558833879185627
BICD2	1134.01068800068	-0.21075565699456	0.0885492360886645	-2.38009571063414	0.0173081418889423	0.084385178044445
BID	1118.72888378997	-0.139808201854941	0.150234458941855	-0.930600095608229	0.352060465035563	0.566225947278267
BIK	2.19472686096016	0.408128341865975	0.425994487122887	0.958060149140478	0.338032428933133	0.553143974617854
BIN1	4012.8639377579	-0.2581033555569	0.199594791193675	-1.29313672973786	0.195963773679487	0.398351862797257
BIN2	272.173303315941	0.229944883009571	0.204442568174491	1.12474072822894	0.260698917563422	0.475956812586196
BIN3	353.167622951547	0.155553747970792	0.107901815893638	1.44162307818921	0.149408734313651	0.336085546713543
BIRC2	1152.10503311528	-0.0653162914528449	0.0781039628863671	-0.836273718247474	0.4030009349457	0.612989579782912
BIRC3	59.2864134169519	0.423624085469001	0.332049435616622	1.27578619334896	0.202031109484956	0.405991950262991
BIRC5	164.506656547935	0.0986201032609977	0.448148983798832	0.220060977099676	0.8258236655985	0.915459199378458
BIRC6	1706.4038394941	-0.214237577439054	0.13194269818453	-1.62371681333536	0.104436260984974	0.266643879743264
BIRC7	12.2356332316909	0.186042121970358	0.425420791060317	0.437313187036927	0.661884233089104	0.815708469563996
BIRC8	0.00558645259618473	0.145958432454859	5.23039083411357	0.0279058366925261	0.977737253250267	NA
BIVM	713.329615520226	-0.450888709882865	0.132050491534659	-3.41451746708964	0.000638950965122775	0.00899031005855848
BLCAP	2352.34989265367	-0.0100521999372256	0.09916107472161	-0.101372438383173	0.9192548147291	0.962961100840012
BLID	0.0104480199567718	0.145959087611461	5.23039083411357	0.0279059619521143	0.977737153346483	NA
BLK	1.35644565779463	-0.926516493079068	0.855329587108162	-1.08322745646107	0.27870747561794	0.495694379543806
BLM	321.229479530059	0.538398115990442	0.350447482208799	1.53631611959952	0.124460867902805	0.2981291230356
BLMH	823.933602021301	-0.166154184195858	0.0931785851095654	-1.78317994419515	0.0745570161270188	0.214879935271114
BLNK	178.428261354754	0.673464728346987	0.251811600085113	2.67447857096081	0.00748455593537731	0.0475909776626431
BLOC1S1	1489.5391419364	0.36720302215159	0.15779058443166	2.32715420551996	0.0199570593689367	0.0920712014665353
BLOC1S2	974.732394705015	0.142496493235464	0.0978086459897694	1.45689056211216	0.14514659167017	0.329673615184161
BLOC1S3	305.449727969128	0.00996845263754122	0.0928702207256066	0.107337449611474	0.914521275653417	0.96114796856511
BLVRA	768.914565853908	0.180412242987935	0.108980338921076	1.65545679866705	0.0978318727417453	0.256295561719415
BLVRB	639.772507050972	0.689780830964434	0.184554613036141	3.73754315655797	0.000185827200908726	0.00401802355682077
BLZF1	302.017973006006	0.362046298335463	0.0843679558490609	4.29127735396582	1.77648263605374e-05	0.000786815535997989
BMF	303.475071368369	0.0812774012421571	0.231650999636549	0.350861431073805	0.725692307787203	0.858010287693399
BMI1	1520.95023838628	0.0101140792258582	0.101812817105203	0.0993399408191144	0.9208683670493	0.963819527833854
BMP1	675.876296461096	-0.0093920746319545	0.139057855723519	-0.0675407698694004	0.946151206444659	0.974829026201104
BMP10	0	NA	NA	NA	NA	NA
BMP15	0.0351955565921729	-0.185380987465457	4.82743159655174	-0.0384015772689302	0.969367503432425	NA
BMP2	936.836945734137	-1.03724946862952	0.314430644898286	-3.29881799200919	0.000970928416681588	0.0121328942243004
BMP2K	507.542384290134	0.470450581132172	0.2007037259181	2.34400521953511	0.019077904411253	0.0895247591657495
BMP3	3.12774819189897	0.319591197371385	0.656315927884777	0.486947190816146	0.626295755318147	0.79165262703015
BMP4	113.2549353151	-0.298370186397216	0.235944489674575	-1.26457789630409	0.206022680757507	0.411724810555845
BMP5	1.55525169286386	2.50369323211779	1.45339184432708	1.72265534713868	0.0849508697437237	0.233041424825574
BMP6	108.760399786925	-0.15661040970345	0.291239956407814	-0.537736688451338	0.59075884644902	0.766009920453294
BMP7	2370.10428640612	0.177886834789742	0.180090597106709	0.987763035092496	0.323268714982844	0.539586704973692
BMP8A	163.14645790971	-0.537429183336701	0.240236182117075	-2.23708676436922	0.025280669846467	0.106824291408705
BMP8B	174.899700896495	-0.498863077697035	0.30174856442882	-1.65324093137388	0.0982818392164876	0.257151785108412
BMPER	144.914251574442	-0.274199956691311	0.318992152175444	-0.85958213962738	0.390019423776244	0.601383062797498
BMPR1A	743.046486623403	0.0988045698347721	0.147551670302595	0.669626915318181	0.503095651800393	0.69934029148691
BMPR1B	1105.19621769761	0.45983789164677	0.195784112091876	2.3486987107053	0.0188391439056155	0.0888536721791027
BMPR2	2660.11773679359	-0.0139780620800699	0.115766133149175	-0.120743966303668	0.903893833657138	0.956951363957766
BMS1	811.946581945942	0.0938852280031639	0.0819177451077559	1.1460914589344	0.251757311243793	0.465695769092043
BMS1P4	14.8808542921741	-0.238262132067567	0.230089538930552	-1.0355191860308	0.300426511090194	0.518153608519458
BMS1P5	57.6015455715871	-0.570195780746762	0.188394227340473	-3.02660961960518	0.00247313129328916	0.0227827084610275
BMX	2.17669119976556	-0.219549433618679	0.491504856688483	-0.446688228266745	0.655100182486436	0.811016280996288
BNC1	1.22498500996051	0.878761249787629	0.829423746524442	1.05948407369566	0.289379378643479	0.507076591967164
BNC2	79.3810703647306	-0.0165961578666978	0.288029553934842	-0.0576196353463511	0.954051608911459	0.979209819146453
BNIP1	211.279522733275	0.0968866968698143	0.0949918465062287	1.01994750532048	0.307753357743651	0.524700946140735
BNIP2	517.059297175518	0.217420902933206	0.0893954791024116	2.43212414225252	0.0150105615507417	0.0766817948310901
BNIP3	1482.33892038476	-0.0645203742134129	0.137406785991709	-0.469557407574513	0.638671260892143	0.799466954176639
BNIP3L	3331.28172792125	0.1029117490982	0.0940389802850157	1.09435203132034	0.273800613474284	0.490093831524444
BNIPL	6.5830012365182	-0.29695355790243	0.282156808215357	-1.05244158303556	0.292596998889288	0.510431527219923
BOC	968.028265929145	0.120450755866124	0.197481421903277	0.609934619192274	0.541905118596289	0.729654649389627
BOD1	754.098551186695	0.0550871141874943	0.0841134826920307	0.654914199536687	0.512522997446853	0.706329593814325
BOD1L	1340.45192424842	-0.0780086381849238	0.11832994114709	-0.659246826531887	0.509737281655511	0.704244718342449
BOK	726.157139098092	-0.606660216142449	0.350249684852281	-1.73207926339266	0.0832594507380498	0.230086282952453
BOLA1	292.110788697622	0.17828957022106	0.127595509664618	1.39730285720627	0.162322517002623	0.35431943441869
BOLA2	746.956652903234	-0.0418465045339842	0.120897730221391	-0.346131432387968	0.729243942114987	0.860224650164766
BOLA3	170.522122806683	0.398857245179338	0.10842472365962	3.67865586110673	0.000234466388079392	0.00463315889059739
BOLL	0.0344237008091035	0	5.23039083411357	0	1	NA
BOP1	527.618595357376	-0.703501116391284	0.234001915255751	-3.00639042044761	0.00264369319717883	0.0237932387746095
BPESC1	0	NA	NA	NA	NA	NA
BPGM	735.7812000882	0.421742912982666	0.114491826863784	3.68360715812869	0.000229956547891362	0.00457578158603647
BPHL	319.20535350287	0.0929549061674534	0.122364020972255	0.759658806803433	0.447458557778867	0.653799689006757
BPI	1.84571635808038	0.0288973385511413	0.512973352069728	0.0563330208763229	0.955076513736102	0.979706604609131
BPIL1	5.89320324138211	0.681779899022666	0.761597311172909	0.895197355637562	0.370681598078921	0.583422012836337
BPIL2	0.130413624680874	0.94644012334745	2.4374900186015	0.388284717526952	0.697805345479205	NA
BPIL3	0.0515341726217769	0.506607584091743	5.23039083411357	0.0968584566926731	0.922838800385388	NA
BPNT1	535.297778583869	0.0159734987213039	0.0730632717498736	0.218625560267653	0.82694174021458	0.915907267336057
BPTF	2173.02373528627	-0.200113927680107	0.115431230500413	-1.73362032798733	0.0829854712095376	0.229641527612354
BPY2	0	NA	NA	NA	NA	NA
BRAF	106.198796767051	0.14207979054231	0.188169748249828	0.755061809157942	0.45021189678303	0.655694959811908
BRAP	658.781643360001	0.109487697384901	0.0648800322960743	1.68754073495624	0.0914994240703922	0.24493829648101
BRCA1	272.361179142048	0.244689390064347	0.167531637863262	1.46055630557412	0.14413724483888	0.328251765032008
BRCA2	58.8097876781492	0.256754954310303	0.334751926776271	0.767000676539507	0.443081113284174	0.649876393073084
BRCC3	305.169386836088	0.0531580953602383	0.0901961620467142	0.589360945676456	0.555619169146534	0.740633350599923
BRD1	805.731729510574	-0.29543404256157	0.0884894823610169	-3.3386345436655	0.000841912478717105	0.0110103783216662
BRD2	4596.27119734508	-0.134339308649037	0.0707211707854215	-1.89956284881994	0.0574905115230817	0.182158469522303
BRD3	1671.15623128647	-0.313291113050163	0.125485201082104	-2.49663793298764	0.0125376897881655	0.0679074511357807
BRD4	1722.50869942499	-0.212583351493094	0.0948976750882492	-2.24013234565973	0.0250823321948095	0.106324964056357
BRD7	1596.61955031236	-0.0714419440947015	0.0815736189234594	-0.875797163807769	0.381140312191384	0.593185485011724
BRD7P3	0.71658124055859	-0.734497022463471	0.549777761182313	-1.33598896558477	0.181552879982271	0.379293258964489
BRD8	1453.49874610688	-0.0680711798227198	0.0874068029909809	-0.778785832376728	0.436105884794657	0.643529954076606
BRD9	917.913105282526	-0.188998920951226	0.0812042928432389	-2.32744987159828	0.0199413340516775	0.0920712014665353
BRDT	0.0683641815163209	0.295483621813162	4.04259066176935	0.073092639481791	0.94173239883531	NA
BRE	575.645894530943	0.217163750898308	0.0820220982742242	2.6476249141087	0.00810594068270366	0.050349231556607
BREA2	8.09415528292163	-0.093340975590601	0.262388531221061	-0.355735729592395	0.722038484709394	0.855597761584469
BRF1	1156.5200302399	-0.320946119905724	0.102462246559458	-3.13233537895816	0.00173421650278332	0.0179635260098212
BRF2	350.956559070762	0.0863978700807448	0.0813742760834685	1.06173442319933	0.288356267399569	0.506044029006279
BRI3	1074.86683426493	0.281842321321985	0.145789409286053	1.93321533232213	0.0532096767567857	0.173178142165192
BRI3BP	58.2913613591946	0.0462351963928672	0.172293133759323	0.268351938258047	0.788428430794896	0.895723570807793
BRIP1	41.5538604116217	-0.100214113995702	0.417110047733755	-0.240258211328607	0.810130088806605	0.907648551833044
BRIX1	436.290559701577	0.000181593874039093	0.0946727635421151	0.00191812161433643	0.998469561316641	0.999596296795709
BRMS1	742.063455414883	0.0534025908587406	0.125823667530009	0.424424052382705	0.671256582554795	0.82195402784391
BRMS1L	404.047671053551	-0.0891269267930077	0.10705723896258	-0.832516583247214	0.405117421723638	0.615261014975629
BRP44	768.970631040173	0.0203714527351247	0.0901459915118106	0.225982901662973	0.821214718861763	0.913356159604646
BRP44L	1278.30333928685	0.0248976612986515	0.134671656190048	0.184876773650991	0.853325688882381	0.930562539673917
BRPF1	580.228760642519	-0.161704112796395	0.0734465528225632	-2.20165694075595	0.0276895504895457	0.113445772819096
BRPF3	934.517313721331	-0.234025982056433	0.119808052334066	-1.95334101086869	0.0507792010201877	0.168067659257319
BRS3	0.147479389508702	-0.507970151486209	1.67458167707326	-0.303341520118631	0.761629607363347	NA
BRSK1	1200.7909933547	-0.509399347422115	0.187793828962794	-2.71254572227204	0.00667685695468077	0.044073059734891
BRSK2	684.401018349899	-0.748865214666892	0.212721314776766	-3.52040516227895	0.000430888052229753	0.00709049784295402
BRWD1	1667.06983351927	-0.137512857047584	0.0899608223957893	-1.52858603762632	0.126367099519201	0.301256552788215
BRWD3	177.157454170417	-0.353698862260466	0.224517574647576	-1.5753727200005	0.115170437431714	0.284087078998229
BSCL2	2373.86452313646	0.490898307969352	0.241430367597738	2.03329147386823	0.0420230840642771	0.148488720307296
BSDC1	2609.52609707775	-0.0492919621081916	0.0629135462995204	-0.783487261606923	0.4333410311841	0.641186408520734
BSG	11147.9611566694	-0.0174675092914042	0.118369742681137	-0.147567350369748	0.882684223572117	0.945800721503624
BSN	1157.8304608449	-0.437183183863986	0.274492965085398	-1.5926935822489	0.111228947979023	0.278039802555988
BSND	0.0301114771216367	0	5.23039083411357	0	1	NA
BSPH1	0.0105203863933874	0.0755849899802764	5.23039083411357	0.0144511170154431	0.98847007815654	NA
BSPRY	26.1110183665454	0.413589986583717	0.369015389422047	1.12079332851533	0.262375844607957	0.477970057515984
BST1	43.5207609556029	0.300175043273885	0.268863511348065	1.1164588373068	0.264225780383349	0.480027074444674
BST2	1153.80182423402	0.894119622804535	0.272496897976997	3.28121027961211	0.00103362652854148	0.0126011337194799
BSX	0	NA	NA	NA	NA	NA
BTAF1	793.607439632794	-0.470926844319734	0.147570804384933	-3.19119250099998	0.00141686843283728	0.0157272396044938
BTBD1	2223.23239319102	0.129111523068595	0.0817407661602906	1.57952425862283	0.114215856771445	0.282508727624623
BTBD10	588.591366510194	0.0556191929872835	0.0991647453295143	0.560876678525888	0.574881609497057	0.754808283323585
BTBD11	284.193437109664	0.199259741910736	0.41451993531334	0.480700021725404	0.630729715702079	0.79452539868813
BTBD12	353.962923482696	-0.239572006826336	0.105673170924944	-2.26710341640545	0.0233839089321428	0.101641153110416
BTBD16	5.97666972662781	0.0214023538381419	0.485894190979763	0.0440473548263378	0.964866656780336	0.984221591992183
BTBD17	487.674167818923	-1.70909283529561	0.29451246464108	-5.80312564148506	6.50899799524022e-09	3.20169318527909e-06
BTBD18	3.58768828829059	-0.286473318023532	0.225137368840561	-1.27243788758324	0.203217579671142	0.407522975091611
BTBD19	20.6520086581275	-0.256939214949132	0.2941226915867	-0.873578347739935	0.382347921968292	0.59406170847807
BTBD2	2958.3865554814	-0.385220431499904	0.105805426345499	-3.64083813850906	0.000271751947673678	0.00512764273144605
BTBD3	1657.02781401923	0.164828712186076	0.135899470189055	1.21287236776402	0.22517862169462	0.43441282859271
BTBD6	832.015991898221	0.0209945140822387	0.147173184071612	0.142651762375563	0.88656521502126	0.948131635619142
BTBD7	668.410697695324	0.091285916458964	0.105227925237895	0.867506569692296	0.385664513721154	0.597384146122239
BTBD8	14.7975743873414	0.257880433429534	0.329897769728862	0.781698020091138	0.434392065530146	0.641949221101503
BTBD9	715.509897265728	-0.0384648295464287	0.11255496750971	-0.341742620494386	0.732544594534544	0.862025842478907
BTC	5.75952868971129	0.560749491299533	0.571783523796784	0.980702430136527	0.326739505150438	0.542414123118093
BTD	355.073675506628	0.552246907566521	0.133665002349964	4.13157444250529	3.60286971806723e-05	0.00126784350822475
BTF3	5495.63690329132	-0.0212722015188254	0.104490171476562	-0.203580884385828	0.838681032357452	0.923179506415413
BTF3L1	0	NA	NA	NA	NA	NA
BTF3L4	1264.74084586457	-0.0820569533515181	0.100291749967017	-0.818182486381027	0.413252994003893	0.622496300803899
BTG1	1894.51312004365	0.0169608644910658	0.12018214617525	0.141126323924466	0.887770148281506	0.948650036035063
BTG2	3805.22904543717	0.12592283906388	0.213883726908527	0.588744365380046	0.556032771776229	0.740898556432646
BTG3	575.469252002649	0.444919000716606	0.140279469088647	3.17166156677886	0.00151569529869861	0.0163932817746928
BTG4	0.208822194582243	0.0755621938755473	2.00919818670177	0.0376081336205004	0.970000122819853	NA
BTK	240.272738504151	0.584254737614289	0.216459233740111	2.69914444174633	0.00695179964872349	0.0453089022411547
BTLA	4.03217789943804	-0.10107897052123	0.388715057226031	-0.260033586665139	0.794837866073262	0.899092726372846
BTN1A1	1.00263484014171	-0.619399749211054	0.890736659672224	-0.69537920381427	0.486817689775729	0.687021259084193
BTN2A1	545.924341172747	-0.105951209214791	0.089833775617861	-1.17941396190995	0.238233378232226	0.450364575304358
BTN2A2	291.586505611035	0.718126716789268	0.18543833952608	3.87259031020535	0.000107684754600701	0.00280229704374792
BTN2A3	15.2049717451889	0.154903172458454	0.237030982528724	0.653514451173836	0.513424676074138	0.707084515981094
BTN3A1	693.157441666661	0.692073582689088	0.185446121733511	3.73193883064111	0.000190011647720114	0.00404933335419778
BTN3A2	1137.46376954698	0.758221325200615	0.234285610013886	3.23631197475456	0.00121084968182185	0.0141458921048153
BTN3A3	589.36343302103	0.920289582533165	0.218779049968527	4.20647947171156	2.59379632300467e-05	0.000994491374845841
BTNL2	0.553541155926851	1.07482941146633	1.07426963383191	1.00052107740626	0.317058402608158	0.534239394657271
BTNL3	0.78025287467341	-0.735308346338603	0.886896386635929	-0.829080327103021	0.407058954994914	0.616606362456284
BTNL8	1.81851191526319	-0.698265863460005	0.525407092644201	-1.32899969040361	0.183848072018699	0.382191448675173
BTNL9	173.985974754711	-0.385911094698629	0.287476927781517	-1.34240718960209	0.179464004842756	0.376775501312644
BTRC	1006.76037330477	-0.0622086166478547	0.108895578377106	-0.571268526922424	0.567817632657734	0.749449256492321
BUB1	155.990128870823	-0.164626076569409	0.387481077783755	-0.424862234592223	0.670937106422259	0.821740297485701
BUB1B	148.710144821917	-0.257636345837801	0.407165388405511	-0.63275600818312	0.526892988684193	0.717433082821833
BUB3	1294.11689801147	-0.078874627872934	0.0850893615528971	-0.926962271586682	0.353946123418579	0.568171682852427
BUD13	417.79794397928	-0.0964161966707453	0.0931865708988629	-1.03465763082309	0.30082882947618	0.518648515018281
BUD31	1311.39797456507	0.170593005165866	0.121794950661078	1.40065745123195	0.161316532046369	0.352853042844092
BVES	291.246621974608	-0.268593587824584	0.278702188522815	-0.963729740509723	0.335181439671539	0.550030356650265
BYSL	378.279947476996	-0.159387590436086	0.136342190997818	-1.16902617795424	0.242393084488055	0.455170472563096
BZRAP1	1563.670142854	-0.710653076628583	0.211891007203504	-3.353861430967	0.000796922606264638	0.0105807399125744
BZW1	3015.4936391297	0.196470583907459	0.0756652904216613	2.59657476780416	0.00941584107568267	0.0559906263964702
BZW2	730.209911486624	-0.230561749105084	0.175366109062598	-1.31474519414001	0.188595552165543	0.388628403861636
C10orf10	1097.46326791048	1.13850877484748	0.309754448696561	3.6755203343755	0.000237365132812255	0.00466844033016592
C10orf105	275.659611757689	1.42737101226595	0.490905886515264	2.90762659702098	0.00364182903677391	0.0294005963798539
C10orf107	82.7950349143401	1.0116861034447	0.347762955221214	2.90912556457073	0.0036244125812007	0.0292927989677434
C10orf108	2.44791112787569	0.55728682369366	0.390682207985626	1.42644536224737	0.153739827641501	0.342104885614338
C10orf11	36.6399172894738	1.12480113483394	0.277302023000092	4.05623126245122	4.98708824142505e-05	0.00161001473531966
C10orf110	33.6056058264622	-0.293203295184525	0.239413538499419	-1.22467299477818	0.220698452975085	0.429783724399358
C10orf111	9.08485250721693	-0.420725158091062	0.208474113660518	-2.0181170251966	0.0435790749592902	0.151956355617211
C10orf113	0	NA	NA	NA	NA	NA
C10orf114	55.205382134481	0.4988321721552	0.289244072183776	1.72460637961928	0.0845984329590114	0.232433340306412
C10orf116	434.461654541491	0.918532988725816	0.30277264447504	3.03373836932463	0.0024154380597489	0.0223888696857756
C10orf118	207.2829026493	-0.00819096112637204	0.184494843301847	-0.0443966941285781	0.964588196755634	0.984221591992183
C10orf119	1033.70541148177	0.0483695255801497	0.0911476304904797	0.530672331467815	0.595645862632297	0.768853915860597
C10orf12	49.316229673113	0.0198991787456989	0.185160812472349	0.107469709599976	0.914416354360533	0.961131335288234
C10orf120	0.290214337489419	-0.760148174035365	1.57538743355801	-0.482515067622807	0.629440097272486	0.793833839596333
C10orf122	0	NA	NA	NA	NA	NA
C10orf125	71.7492348244342	0.379149310301474	0.255289497005577	1.48517394859057	0.137497751120899	0.317432861812301
C10orf128	15.6791911968899	-0.375435727799902	0.297196471328149	-1.26325768984439	0.206496586292766	0.411916506560047
C10orf129	0.00553608702506999	-0.0446300835854814	5.23039083411357	-0.00853283913209617	0.993191862012796	NA
C10orf131	1.06341799414598	0.097836165125733	0.400991614246496	0.243985563911548	0.807242000445407	0.906116838918215
C10orf137	305.091577285588	-0.417241042346015	0.104068930604166	-4.00927577446745	6.09052549173024e-05	0.00184687739278741
C10orf140	32.5561445028313	0.522475988859202	0.293267998081414	1.78156495859517	0.0748202030268078	0.21523226537003
C10orf18	1324.10979864731	-0.081594753460463	0.137708981495164	-0.592515844460939	0.553505213939361	0.738551392215198
C10orf2	430.830406915965	-0.343856375575428	0.149615186895453	-2.29827187139568	0.0215463203532593	0.0963767061264684
C10orf25	122.435375299727	0.066246833953596	0.146779096297649	0.451336979342454	0.651746696603455	0.808644071770268
C10orf26	1724.47655713742	0.123441895233969	0.116370407665111	1.06076706020665	0.288795775386242	0.506498159855204
C10orf27	0.0200658718477411	-0.115001747781319	5.23039083411357	-0.02198721881953	0.982458150979081	NA
C10orf28	233.158680263438	-0.0352125055818256	0.0898242137662408	-0.392015739469347	0.695046584300838	0.838264721016711
C10orf32	823.52661839044	0.102964236877321	0.138268333918607	0.744669686538148	0.456471428874884	0.660891242675375
C10orf35	155.015150211575	0.380556431682685	0.316053178707145	1.20408987259486	0.228554843831041	0.438854586414286
C10orf4	552.69621553947	-0.177296976173231	0.138449424603044	-1.28059019877886	0.200337644428724	0.403909801784653
C10orf40	0	NA	NA	NA	NA	NA
C10orf41	40.5919837777904	0.701954360992211	0.173953281414665	4.03530393496234	5.45316607236005e-05	0.00172259597370603
C10orf46	938.573156609282	-0.0242220426298878	0.0928936260874147	-0.260750318941091	0.794285059026946	0.898718182023259
C10orf47	12.8526828938497	-0.149068492976258	0.249232309749913	-0.598110626691368	0.549766120074514	0.73627509147129
C10orf50	1.08703726492693	0.799818112815531	0.55589323696978	1.43879806341125	0.150207745251535	0.33741857278115
C10orf53	0.0673984778971836	0.345326567848413	3.33958525767156	0.103404028106527	0.917642315319476	NA
C10orf54	2546.41628288582	0.379460533828676	0.206679883417834	1.83598194247836	0.0663603273496498	0.199380351946767
C10orf55	7.0579231636894	0.675634230051007	0.454331048053683	1.48709676115108	0.136989256846599	0.316706199102025
C10orf57	493.653840838333	0.155183704969185	0.0952140468987297	1.6298404492169	0.10313522236932	0.264674977685902
C10orf58	3098.29408871202	0.534702602876899	0.185970028170158	2.87520848460409	0.00403760796012822	0.0317463888113998
C10orf62	1.26407835303094	0.157472780442154	0.457291281938596	0.34435990070613	0.730575641389036	0.860899351702558
C10orf67	2.32712318069121	1.29857494157828	0.573103408515148	2.26586497704271	0.023459651542926	0.101822701917667
C10orf68	5.7963754058692	-0.183413455265654	0.280099066445496	-0.654816374767687	0.512585986577475	0.706362266122781
C10orf71	0	NA	NA	NA	NA	NA
C10orf72	506.599538314236	0.593068458910654	0.163214521220084	3.63367459266042	0.000279413221221767	0.00523659556549655
C10orf75	348.933699098752	0.100816328746282	0.220695159981359	0.456812595051008	0.647805752057526	0.806567384511166
C10orf76	641.898092516495	0.199742303251365	0.0826190666860556	2.41762962549997	0.0156219687082627	0.0787757266718959
C10orf78	126.535253881298	0.230391296360369	0.120024787549194	1.9195309657677	0.0549171712686203	0.17684824028516
C10orf79	80.4341020665303	1.43666987812402	0.39002644025786	3.68351919211988	0.000230035955609886	0.00457578158603647
C10orf81	32.4197588887315	3.71467626213372	0.780444493726904	4.75969308771057	1.93887561603817e-06	0.000183499270145254
C10orf82	2.93906421141782	0.106407086497173	0.58210670441372	0.18279653144408	0.854957670264227	0.931466151268787
C10orf84	564.619024866082	0.147027267207957	0.0864176471137374	1.70135698110884	0.0888759741354087	0.240742662943014
C10orf88	170.377893593351	-0.309434515590524	0.0932824658206899	-3.31717770181298	0.000909317611223187	0.0116214280632661
C10orf90	145.544272903657	0.380448928123102	0.287262169875758	1.32439620673912	0.185371493729532	0.384203573103325
C10orf91	0.0362362474086209	-0.115000250277053	5.23039083411357	-0.021986932511238	0.982458379364836	NA
C10orf93	16.672716200634	0.559189782387729	0.240842013326976	2.32181160862724	0.0202430819077408	0.0927653157148304
C10orf95	3.14991033144475	-0.613392672060986	0.285685555135513	-2.14709025722363	0.0317860967923389	0.12387695140413
C10orf96	0	NA	NA	NA	NA	NA
C10orf99	0.0549392912618185	0.386394522787499	5.23039083411357	0.073874885270019	0.941109939881389	NA
C11orf1	230.066722440143	0.262459032536574	0.117288376124403	2.23772415655406	0.0252390489542137	0.106787900775216
C11orf10	908.460226930451	0.188360073237063	0.110579546551909	1.70338981403438	0.088495142638941	0.240018047501273
C11orf16	0.100486758363885	0.0550318171737832	1.83887156184207	0.0299269499380673	0.97612531252956	NA
C11orf17	410.102453392829	0.0555027888368025	0.0968608342365968	0.573015804316002	0.566633993133395	0.748685454629295
C11orf2	3006.81432727628	-0.367436807323221	0.130825895518537	-2.80859386336978	0.0049758374927236	0.0364017533743514
C11orf20	20.8835261430789	-1.0495889483373	0.357404267010641	-2.93669954507301	0.00331725326042172	0.0276161333930108
C11orf21	6.83561767889319	1.24930125782121	0.388452558003013	3.216097389714	0.00129946725288981	0.0148421157204809
C11orf24	547.696143308653	0.318745003105962	0.123397968733004	2.58306523501719	0.00979268046525734	0.0575370594660757
C11orf30	394.1574869266	-0.0981260543348815	0.125481663930294	-0.781995163766646	0.434217415808579	0.641902135076444
C11orf31	815.7520035407	-0.0272446250215764	0.132812222846312	-0.205136428242025	0.837465535958973	0.922401256034778
C11orf34	0.0949867181841843	-0.0153434120151401	1.83982445335442	-0.00833960652450596	0.993346033840505	NA
C11orf35	6.23978092868116	0.0849740052525047	0.359369257727299	0.23645318408673	0.813081031008519	0.909352119835226
C11orf36	0	NA	NA	NA	NA	NA
C11orf40	0	NA	NA	NA	NA	NA
C11orf41	1058.21492150714	-0.0919238848456189	0.22235463875321	-0.413411140694234	0.679305413676899	0.827774875487416
C11orf42	1.49256345416439	-0.94790491339506	0.432679406551326	-2.19077889782262	0.0284677963969133	0.11555483404273
C11orf45	44.9546376002903	0.0582400659042469	0.222337441512316	0.261944481811539	0.793364245035462	0.897883832580908
C11orf46	594.805452950887	0.129287161468053	0.0868736675923148	1.4882203670136	0.136692787739124	0.316473583576322
C11orf48	637.254045751382	0.0909963068731413	0.140352396588027	0.64834166772542	0.516763989630454	0.709536197743924
C11orf49	1213.19799070407	0.0270052169321285	0.115397715154307	0.234018644962057	0.81497050393209	0.909840417315878
C11orf51	395.533962974927	-0.00883251858672285	0.136088252949891	-0.0649028729171437	0.948251333162164	0.976150438780557
C11orf52	19.5090798202061	0.367948883135788	0.361399491233932	1.01812230526251	0.308619836389238	0.52567982361952
C11orf53	0.149744510239707	0.776370663976286	2.43978495508345	0.318212743446371	0.750323566923617	NA
C11orf54	527.380678639973	0.0931796514225549	0.0884022445116549	1.05404169246257	0.291863829340592	0.50984023501093
C11orf57	1036.21868540603	-0.0574883649516711	0.0732447596180344	-0.784880246060855	0.432523785021641	0.640346015335019
C11orf58	2753.24944792795	-0.0249175044640415	0.0773729238752145	-0.322044239975058	0.747419179674869	0.871549889722237
C11orf59	2180.32036014737	0.0911980452233046	0.0958063514511648	0.951899783698483	0.341147809262329	0.556279053139311
C11orf61	237.180316885726	-0.422916916651451	0.137207607029076	-3.08231391690862	0.00205398105477636	0.0201334063159833
C11orf63	48.5709588108899	1.41682730111783	0.451785946471952	3.13605881763698	0.00171234857857747	0.0178191273958218
C11orf64	0	NA	NA	NA	NA	NA
C11orf65	6.37750788226982	0.120080806441282	0.208360624261896	0.576312376038711	0.56440405912502	0.746776579010575
C11orf66	66.0893739796016	-0.287592725877262	0.283636422583532	-1.01394850230338	0.310607325921537	0.528047151842076
C11orf67	248.016291174261	0.305305695905866	0.158363187209712	1.92788299658029	0.0538696811468658	0.174695149933803
C11orf68	1240.60117201572	0.0373420616881215	0.096216202245086	0.38810575367548	0.697937774222473	0.840698091487387
C11orf70	55.3500637218125	0.976773124826762	0.402040747473163	2.42953763011786	0.0151180954562678	0.0769905387976799
C11orf71	387.516719920862	0.276667765957125	0.127073981542891	2.17721804729745	0.0294643023876225	0.118336892323691
C11orf73	612.239191282261	0.0811034424611686	0.0996284875384589	0.814058754328282	0.415611292938296	0.624191445527631
C11orf74	215.224963546681	0.117377791574382	0.115700481439344	1.01449700220925	0.310345659142066	0.527719682524126
C11orf75	131.667327259094	0.0497064151858128	0.1919188211449	0.258997084753267	0.795637489801476	0.899522617935217
C11orf80	85.1925979297812	-0.0508170367848041	0.17955138435467	-0.28302224996731	0.777159781011696	0.888660731811476
C11orf82	72.1369778265952	-0.0230461528720098	0.27636018414687	-0.0833917264281531	0.933540066952527	0.969317037505376
C11orf83	356.010464758759	0.0353743857662615	0.1793825239574	0.197200847584585	0.843670367362701	0.926067812138375
C11orf84	397.73239186643	-0.363824553476936	0.107351774700993	-3.38908746027067	0.00070125639749334	0.00967023967770341
C11orf85	0.0151315130820234	-0.0446285392895076	5.23039083411357	-0.00853254387768351	0.993192097583158	NA
C11orf86	1.37467830796367	1.44332836774351	0.830093949834891	1.73875302672739	0.0820782143206756	0.228048586204325
C11orf87	140.705929553758	-0.230555538350284	0.528246883673583	-0.43645413816156	0.662507266890707	0.816196606825753
C11orf88	5.24659217936623	2.71460238916386	0.990992096774918	2.73927753611583	0.00615743702940061	0.0416721989697711
C11orf9	1866.58704824507	-0.498503411375805	0.38067481079176	-1.30952560359582	0.190356370692606	0.390841317400599
C11orf90	1.35171098340067	-0.435326956397824	0.606986334577948	-0.717193998610392	0.473254401809176	0.674919553757841
C11orf92	101.59989728901	0.370652627541023	0.415092271683981	0.89294032393648	0.371889131281392	0.584357400033763
C11orf93	98.1045186460788	0.450678532378341	0.319388827991424	1.41106542521407	0.158225323578889	0.348577101491295
C11orf94	0.0197600295927537	-0.0446278841329061	5.23039083411357	-0.00853241861809539	0.993192197522211	NA
C11orf95	810.663563121489	-0.241525877573493	0.140041240920976	-1.7246767879598	0.0845857364626169	0.232433340306412
C12orf10	752.545088588369	-0.0332380304489858	0.104787719928624	-0.317193946691709	0.75109644279736	0.87371674205196
C12orf11	462.941411969803	0.264810313887396	0.117460789845766	2.25445711913831	0.0241674253984063	0.103817162807965
C12orf12	0	NA	NA	NA	NA	NA
C12orf23	1138.03604761658	0.0767532839660678	0.0988917672858941	0.776134212913554	0.437669744693846	0.645205354618229
C12orf24	306.198167224738	-0.266690978788183	0.118044079099463	-2.25924909425971	0.0238678945118366	0.102973243548907
C12orf26	53.0486213912567	0.0370189162221849	0.124796390823428	0.296634509843816	0.766745561025324	0.882916155120221
C12orf27	0.0540535945139318	0.556448138852485	5.23039083411357	0.106387487379189	0.915274920359537	NA
C12orf29	509.487371305131	0.0198457877392493	0.0955462557727148	0.207708691238078	0.835456431054967	0.921361624188434
C12orf32	610.697422125868	0.404948613502945	0.151869454807004	2.66642567471882	0.00766625558216625	0.0484253567190469
C12orf34	1117.00110971232	-0.676353263499161	0.231768622427425	-2.91822618789112	0.00352028893240946	0.028725007225062
C12orf35	497.925090007661	0.479644464836994	0.143712980915452	3.33751663754838	0.000845306608915558	0.011030699159303
C12orf36	0.00495132054472983	0	5.23039083411357	0	1	NA
C12orf39	56.1308168778872	1.24556357000885	0.465977316180848	2.67301331364689	0.0075173266956386	0.0477486996259178
C12orf4	465.124164389389	0.561266418692902	0.153831326665709	3.64858335982886	0.000263690344379014	0.00501765055304067
C12orf40	0.20811705430949	0.0726213721384993	1.89487004875169	0.0383252520067753	0.969428357383253	NA
C12orf41	537.834544985337	-0.182887471450498	0.089856830850385	-2.03532073988913	0.0418186106510836	0.147940636775091
C12orf42	0.807367941657096	0.0484995529641759	0.617283629697841	0.0785693166493275	0.937375193834497	0.971275242829903
C12orf43	323.563044300461	0.0509396031515765	0.0789898365278542	0.644888069031687	0.518999724000268	0.711276048850912
C12orf44	665.06975610792	0.0440771874867275	0.118679796049384	0.371395881640938	0.710342692556479	0.848729720767482
C12orf45	79.9567997614177	-0.112515659628514	0.141160333848637	-0.797077029791965	0.425406295894691	0.633774317545844
C12orf47	371.167147357656	-0.153694333914449	0.107232905029095	-1.43327585756208	0.151779018554855	0.339548433895671
C12orf48	40.193991826209	0.157716514755068	0.243554383384179	0.647561799396107	0.517268411522349	0.709931352159585
C12orf49	612.215769995881	0.129691005209216	0.157073637480877	0.825670095180711	0.408991260642345	0.618387358014853
C12orf5	423.433898515361	0.633339796956278	0.145068983690012	4.36578364889918	1.2666780848869e-05	0.00063457325856217
C12orf50	0.125674463185898	-0.276318781002625	1.52662884109896	-0.180999319260675	0.856368110341023	NA
C12orf51	2131.19098164964	-0.416751827684303	0.117697289440023	-3.5408787208874	0.00039879684319875	0.00667085100874411
C12orf52	382.374716330414	0.148265379608104	0.101761325748572	1.45699143085491	0.145118745645676	0.329652006594308
C12orf53	1793.58059437132	-0.111463769974404	0.197014797659506	-0.565763441622506	0.571554601622432	0.752008110512517
C12orf54	0.864444758895723	0.0967702952352251	0.551704412722831	0.175402431091015	0.860763430466011	0.934007118240932
C12orf56	0.391226623621499	-0.246995503341275	1.34159434724802	-0.184105951137861	0.853930337949654	0.930967341882543
C12orf57	1667.37043434911	0.372664771439268	0.179770436382632	2.07300365364898	0.0381719395396551	0.139598905186512
C12orf59	64.7720268267913	0.529964268359031	0.250656291295238	2.11430666918632	0.0344890831213956	0.130263115456613
C12orf60	22.094310022807	0.619912191360862	0.140508367876551	4.41192365073596	1.0245624499903e-05	0.000554930179991732
C12orf61	8.38907335319914	0.213017730619961	0.23530301710234	0.905291114594224	0.365311182422403	0.578627096668088
C12orf62	466.168891344604	0.201059061966516	0.129479990673931	1.55281955860534	0.120466248718985	0.291629521333439
C12orf63	18.9003686371887	1.68978482883967	0.509968326268975	3.31350937263587	0.000921330191257948	0.0117249536441617
C12orf65	413.401647735109	-0.0985206133129732	0.0942555557003919	-1.04524993334227	0.29590747076192	0.513858825614761
C12orf66	89.809619788557	0.0706594841654646	0.142552059426152	0.495674944647637	0.620123767253996	0.786939906988787
C12orf68	368.9362483987	-0.00876204905928382	0.268611073608214	-0.0326198355919749	0.973977751731866	0.988084728867998
C12orf69	0.943507305178558	0.794091420101831	0.488529063114739	1.62547426562281	0.104061542888616	0.266027106088014
C12orf70	0.592752725403941	-0.279254557519863	0.770329691312809	-0.362513039116995	0.716968681426914	0.85284982664674
C12orf71	0.643116790701123	-1.06351260786467	0.615567319856494	-1.72769504416285	0.084042912530126	0.23150423607793
C12orf72	58.9179562032226	0.615830858440048	0.109782097578821	5.60957453010855	2.02824636055479e-08	6.51284393848147e-06
C12orf73	144.688816698235	-0.12275227186675	0.111659115494136	-1.09934841704166	0.271616121169498	0.488238224272958
C12orf74	0	NA	NA	NA	NA	NA
C12orf75	168.083426852943	-0.0271413369523357	0.199346719176958	-0.136151410288537	0.891701586347496	0.950917681070067
C12orf76	717.415553614697	-0.183809515589965	0.107093333118616	-1.71634881684351	0.0860982184825837	0.235112857213944
C12orf77	0	NA	NA	NA	NA	NA
C13orf1	347.803471090627	-0.00802564108806892	0.106858863059574	-0.0751050578143866	0.940131123639387	0.971856157820262
C13orf15	2736.40745496915	0.0224719873455607	0.241049891929336	0.093225461192691	0.925724447361548	0.965570923462995
C13orf16	8.27013030619212	-0.431932116760985	0.344519580449173	-1.25372298491089	0.209942710519646	0.416044723447682
C13orf18	218.864771344628	0.445480290806978	0.302441390971762	1.47294750025988	0.140765192521683	0.322779863800677
C13orf23	776.076430734701	-0.113204858553246	0.108754087398423	-1.04092509312792	0.297910314682596	0.515679146569214
C13orf26	23.2191922853249	1.82500061584066	0.596245259538288	3.06082201350141	0.00220730264975265	0.0210672914838283
C13orf27	200.354185715517	-0.199457990397173	0.176719503288238	-1.1286699356089	0.25903709639692	0.474096243359438
C13orf28	0	NA	NA	NA	NA	NA
C13orf29	30.4337198225033	0.308310703842829	0.311298560229682	0.990401958863388	0.321977688377931	0.5386885462598
C13orf30	6.90571806567584	3.5752782978135	1.16449653074809	3.07023525052211	0.00213890223246174	0.0206339806567204
C13orf31	155.205172415999	0.190002131569341	0.281889339924851	0.674030921566576	0.500291655096118	0.697132652836241
C13orf33	13.1145872120751	0.880094361253066	0.534679020742175	1.64602373968485	0.0997588715230203	0.259474991498004
C13orf34	80.6788140476129	0.284448851696568	0.150902930235524	1.88497898120739	0.0594326756273406	0.18586406489232
C13orf35	0.146719669958179	-0.106246729094967	1.40921721787637	-0.0753941463013605	0.939901116530388	NA
C13orf36	49.6384339532688	-0.756067349575901	0.559725384152087	-1.35078267125806	0.176765060645599	0.373258262102779
C13orf37	279.111208293028	-0.0118702318798365	0.123701127065455	-0.0959589630380287	0.923553164854714	0.964495003391414
C13orf38	15.3752651369673	1.11877476895109	0.265819645210063	4.20877384012374	2.56760221913346e-05	0.000988664306305309
C13orf39	1.38497914332167	0.677647721752794	1.00406210313991	0.674906183226762	0.499735371851257	0.696605488010369
C14orf1	820.273621180805	0.113907626354002	0.111377260841361	1.02271887002362	0.306440786765618	0.523680836328752
C14orf101	294.538631183745	-0.222163051962426	0.129006818631722	-1.72210317500068	0.0850508300684692	0.233244475566755
C14orf102	272.859944706785	0.124281224997047	0.105075757869457	1.18277733624772	0.236897404912537	0.44932264098905
C14orf104	271.286973311614	-0.0713959774721541	0.10678030144574	-0.668624985184497	0.50373473037256	0.699904027318759
C14orf105	1.50027555549789	0.271590146400407	0.887375596761922	0.306059967607238	0.759558987450025	0.878014252528051
C14orf106	228.549531834814	0.179326738547322	0.19288548746179	0.929705707293533	0.352523478655412	0.566697406864081
C14orf109	255.368863158032	0.00808503726116589	0.0947695210008477	0.0853126319071885	0.932012849336565	0.968810628173311
C14orf115	0.125516038041774	-0.22646432300613	2.44504836007744	-0.0926216130133954	0.926204172853229	NA
C14orf118	224.907118823807	-0.227590560842541	0.146654613485265	-1.55188135875049	0.120690614061581	0.291974752755814
C14orf119	593.160272924562	0.345363875488476	0.0829528809182575	4.16337409461162	3.13578971015241e-05	0.00115548710180247
C14orf126	380.449790499166	0.0729877003496936	0.0984444097910001	0.741410309682879	0.458444695309188	0.662225954255562
C14orf128	148.666829191074	0.400134211184468	0.160315140681672	2.49592277736879	0.0125629947657985	0.0679626269189494
C14orf129	255.378736167551	0.109353295413874	0.112761871390339	0.969771910181712	0.332160197284013	0.5470193852515
C14orf132	4840.32983743334	-0.127785879892072	0.196713575164104	-0.649603769264369	0.515948197718257	0.708876871284359
C14orf135	1107.49027789794	-0.00657296615684456	0.102439678321423	-0.0641642600264779	0.948839435095697	0.976364970069637
C14orf138	92.4040818797402	-0.237388379314138	0.147774478118694	-1.60642339825058	0.108180913268508	0.272834387432583
C14orf139	160.883809540049	0.301676238767715	0.199114728868245	1.51508751001205	0.12975024424474	0.305950746570351
C14orf142	162.441469452717	0.477045431706716	0.112801234479151	4.22907988471426	2.34649021422688e-05	0.000937657489605062
C14orf143	46.1375140267318	0.288295096193738	0.129279132881584	2.2300203425545	0.0257460924095563	0.107993056615032
C14orf145	62.3869737320003	0.0248090754480849	0.152986922019175	0.1621646812724	0.871176171879234	0.939529377313263
C14orf147	1170.0579698069	0.207725888013428	0.136011310590956	1.52726921835309	0.1266940804298	0.301591735125792
C14orf148	11.4166744973823	-0.112486484254503	0.21302155690507	-0.528052117770554	0.597463163094271	0.770370184910454
C14orf149	184.229143545515	0.0425977091612058	0.165421767283758	0.257509696944147	0.796785330573023	0.900306141230067
C14orf153	398.861134087785	0.0356300365966374	0.110954532894371	0.321122856968423	0.748117289501874	0.872011929293881
C14orf156	463.391159226184	0.123240405420027	0.129578390541474	0.951087638185946	0.341559889478775	0.55668720498571
C14orf159	1291.70670602619	0.256077950429752	0.152553497132023	1.67861081682144	0.0932279170703453	0.2483591710754
C14orf162	13.3759871433431	-0.166774558622056	0.459585053378608	-0.362880727726074	0.716693983914662	0.852707147607845
C14orf165	0	NA	NA	NA	NA	NA
C14orf166	1471.43339569954	0.304442659037199	0.0973898036220745	3.12602190079983	0.00177188355576519	0.0182068629141541
C14orf166B	0.476041167188464	0.805698146741114	0.898202033829134	0.897012160289077	0.369712428246115	0.582697364842169
C14orf167	493.735203787422	0.102708012516044	0.187834281612462	0.546801210270818	0.5845153115238	0.761829068502957
C14orf169	99.6510380048885	0.43421037656427	0.187270607871372	2.31862533848617	0.0204153599843846	0.0932458733145046
C14orf174	31.027301812837	0.598498390952761	0.262112070818941	2.2833682900708	0.0224086834942267	0.098884158673174
C14orf176	19.0308498562381	-0.0327197370163588	0.19205591605245	-0.170365681458222	0.864722559789813	0.935923983997859
C14orf177	0	NA	NA	NA	NA	NA
C14orf178	2.65565839287992	0.154554726102033	0.273110576138842	0.565905313104613	0.571458149574937	0.751966844431763
C14orf179	291.628004643691	-0.00837845865681116	0.13649420856706	-0.0613832538740632	0.95105398868119	0.977313750664508
C14orf180	0.88264457108402	-0.294628095404858	0.832174988400823	-0.354045843135756	0.723304527533537	0.856307986971365
C14orf181	21.5301204667823	0.439679593490677	0.294673443987384	1.49209099924695	0.135675291145248	0.314964250629207
C14orf182	0.344162887468608	-0.0358716425868549	1.04355775271606	-0.0343743721835156	0.972578619426082	0.987571784658637
C14orf183	0.0100389460482474	-0.115003526060063	5.23039083411357	-0.0219875588091789	0.982457879772154	NA
C14orf184	0.10601578272208	-0.60766603309917	1.83815562005841	-0.330584650433385	0.740958242098242	NA
C14orf19	3.27765911268469	0.17531419157296	0.317008329792755	0.553027081930537	0.580244865850797	0.758944077518841
C14orf2	846.001678319412	0.0928115149863273	0.122557898957913	0.757287092676085	0.448877882051871	0.654953137845581
C14orf21	314.839889256431	-0.00813751827357976	0.153633533707721	-0.0529670709069343	0.957758144477528	0.981557446369253
C14orf23	31.1003520959161	0.0167758799726379	0.409311960975649	0.0409855600912575	0.967307407567518	0.985151416136452
C14orf28	76.6928532692106	0.027896351872085	0.110222372852511	0.253091556188989	0.800197463699603	0.902358872740447
C14orf33	45.1972189718937	-0.070836730089085	0.134354721430597	-0.527236626557088	0.59802927681793	0.770756157193563
C14orf34	0.12077929045595	0.0345051256726084	1.84319122137133	0.0187203179314931	0.985064219729024	NA
C14orf37	329.01186912434	0.043074143430208	0.204741193201687	0.210383375991056	0.833368466353886	0.920339165862315
C14orf39	1.62290934453849	-0.687822780549892	0.970100736443048	-0.709022016694729	0.478310814252259	0.679510736823872
C14orf4	1235.83725935196	-0.073092739358025	0.133050058313941	-0.549362700657803	0.582756565950217	0.76062485075973
C14orf43	937.715828377644	-0.111615604388434	0.118898399607415	-0.938747743930719	0.347860274180876	0.562317821855493
C14orf45	117.733878188961	0.277656451056559	0.166854076719864	1.66406752843519	0.096098935282668	0.252971900783624
C14orf48	0.0158136612843101	-0.0446285392895081	5.23039083411357	-0.00853254387768359	0.993192097583158	NA
C14orf49	81.1874739756177	0.194730832099243	0.238668063191987	0.815906533513032	0.414553595072105	0.623560768674352
C14orf50	13.5923002456461	1.38002692333642	0.438360946609155	3.14815207424684	0.00164306189936718	0.0173573298013374
C14orf53	0.0515622471202816	0.225109058838955	4.64293577179445	0.0484842069551078	0.961330350663163	NA
C14orf64	59.7172022294152	0.416703185727376	0.192421311936438	2.16557709504145	0.0303435182492008	0.120502848554318
C14orf68	0.924062531194433	0.212463486986693	0.567642000799842	0.374291343289114	0.708187571860951	0.847506250313032
C14orf70	0.250257073578275	0.870965841836939	2.63562004528363	0.330459560510442	0.74105274391676	NA
C14orf72	0.212572353717477	0.175255684560889	1.5995550353914	0.109565273268641	0.912754152716839	NA
C14orf73	0.270666573253619	-1.54351410005623	1.57380501134574	-0.980753072285871	0.326714525052962	0.542414123118093
C14orf79	255.97045094638	0.0595898749642284	0.138272800317975	0.430958762874509	0.666498354848081	0.818645725196597
C14orf80	182.511443421404	-0.511464094667683	0.200092916837426	-2.5561329343969	0.0105842675138485	0.0606907839394208
C14orf86	19.797854778739	0.929194242733864	0.414655603068715	2.24088191708308	0.0250337248694908	0.106269225827003
C14orf93	248.780789673375	0.0377689717324778	0.110018346768349	0.343297030376241	0.73137501464041	0.861325655881796
C15orf17	1767.25257759398	-0.114206594041897	0.0753453872931971	-1.5157741985913	0.129576458320746	0.305816954549179
C15orf2	0.551227303033002	-0.906730171236724	1.09514341018028	-0.827955647459413	0.4076956184042	0.617011982198093
C15orf21	30.0438410530345	-0.528713532685587	0.221335061066517	-2.38874731431137	0.0169059254840195	0.0832050353207871
C15orf23	242.699022076566	-0.014808167679574	0.170384267435576	-0.0869104166860544	0.930742719535035	0.96804994983394
C15orf24	1278.97622010653	0.243763224961647	0.0883858299449431	2.7579446288335	0.00581660496418603	0.0402221649584814
C15orf26	10.4383903155155	3.44082115960097	0.787081454895205	4.37162016485206	1.23327942947288e-05	0.000626464144089866
C15orf27	24.1067990782371	-0.453296573178731	0.330578666965179	-1.37122149272409	0.170305920178384	0.364836914063343
C15orf28	4.97364501772762	-0.907705812239415	0.288880189940338	-3.1421531965445	0.00167710260766913	0.0175949002865264
C15orf29	440.691111262769	-0.207220029886717	0.0934306631683072	-2.21790173439557	0.0265615332354874	0.110154402823001
C15orf32	0.0258356676770315	-0.0446269949935344	5.23039083411357	-0.00853224862327094	0.99319233315352	NA
C15orf33	35.4090910337859	0.423093175129279	0.155487021880795	2.72108353489236	0.00650683164852814	0.0432394111987557
C15orf34	7.06841474939694	0.169568618439696	0.237061482672147	0.715293840772131	0.474427493639508	0.675895673476916
C15orf37	47.2265564440954	-0.356584180064151	0.169498264927053	-2.10376301030347	0.0353991249331032	0.132613971780638
C15orf38	375.875064734548	0.00290797099247877	0.12543386055761	0.0231833013793209	0.981504058597457	0.992012582750077
C15orf39	516.143491734874	-0.511061773645233	0.148208440127643	-3.44826362928511	0.000564203055763889	0.00831541882223088
C15orf40	231.614631588078	0.096016530697584	0.0727275771526219	1.32022177084339	0.186760985287072	0.386237612125604
C15orf41	124.53485859443	0.132146509629218	0.104787114703074	1.26109503065973	0.207274610803316	0.412850249386933
C15orf42	113.050530554247	-0.445241393518884	0.25866163094322	-1.72132755791918	0.0851914014961655	0.233523137454885
C15orf43	0.0387674021187685	0	5.23039083411357	0	1	NA
C15orf44	775.487773831807	0.162230490469832	0.069808555052677	2.32393422765182	0.0201290194503967	0.0926202732233964
C15orf48	3.14571783128458	-0.0422314656499279	0.53055933604705	-0.0795980068215834	0.936556980514255	0.970877396949363
C15orf5	0.102033999691665	0.365854153175271	2.04364122842808	0.179020734210122	0.857921421141094	NA
C15orf50	0.490906743761376	-1.7766570825098	0.733218470742389	-2.42309373454671	0.0153889553652035	0.0779065865363429
C15orf51	9.59635497928049	1.35021043946299	0.476071569648994	2.83615012015629	0.00456609778953136	0.0344555478184443
C15orf52	845.075257531394	0.324634852634174	0.185097545902895	1.75385822135363	0.0794548038814492	0.223662536536665
C15orf53	0.0100185138657514	0	5.23039083411357	0	1	NA
C15orf54	0.486821180161622	2.90503716643892	1.33613659309912	2.17420672515285	0.0296896135467514	0.118858506088664
C15orf55	0.0349521685484778	0.0755835556393072	4.83117191546279	0.0156449733029355	0.987517626557909	NA
C15orf56	3.66262154569523	1.19511702117455	0.326224236697049	3.66348323249939	0.000248808510707285	0.00481146604117494
C15orf57	297.727706948294	0.218488134866583	0.087827202608743	2.48770458783612	0.0128570479954616	0.0690341705148972
C15orf58	39.0075810975882	0.0703320169521991	0.104133792601236	0.675400513083438	0.499421339616069	0.696332056212774
C15orf59	684.665749236951	-0.268666085118067	0.213881039932697	-1.25614727328149	0.209062579305017	0.414907792947368
C15orf60	0	NA	NA	NA	NA	NA
C15orf61	93.888600135746	-0.037535102651901	0.110949095070685	-0.338309227560509	0.735130170682282	0.863937698791504
C15orf62	28.0981942941192	-0.856594223028768	0.194592271115494	-4.40199509527469	1.07259982293559e-05	0.000573133320079403
C15orf63	944.687591123266	0.0165243638548541	0.146709332433241	0.112633351817434	0.910321242363109	0.95965217881482
C16orf11	0.50794227896314	-2.48683217827529	1.50171788159461	-1.65599158720454	0.0977235225195929	0.256160988622058
C16orf13	600.272853971462	0.0898801783030409	0.155457943736603	0.578163946741297	0.563153437269635	0.746031023204846
C16orf3	2.25867578034253	-0.497161347184948	0.40525101826278	-1.22679851445202	0.219898329327088	0.42864084097124
C16orf42	1278.50630210773	0.0137538422805976	0.134024307306227	0.102621998628741	0.918262982636432	0.962804011833236
C16orf45	2454.22370890886	-0.235497402743467	0.115963039536726	-2.03079708572905	0.0422755827956347	0.149016209869389
C16orf46	84.8398221945326	0.0801886281640562	0.136581999469931	0.587109783685001	0.557129977152028	0.741659819624277
C16orf48	481.302808830644	0.171548020862063	0.180453704208307	0.950648376073438	0.341782902456359	0.556899252625068
C16orf5	3247.26997035732	0.200407181816793	0.133543921860541	1.50068366290812	0.133437400572067	0.311054101255756
C16orf52	396.708740803199	-0.0216146253956776	0.0904588168623722	-0.238944374306409	0.811148716242852	0.908130136988092
C16orf53	1038.38682504517	0.213780252551908	0.154387710497563	1.38469734322074	0.166145031814216	0.359035286339233
C16orf54	26.4300319982151	0.668484203029526	0.247756750550502	2.69814728173578	0.0069726584381201	0.0453894048448861
C16orf55	198.092130506746	0.27847403532996	0.141320850185706	1.97050919920185	0.0487800417361721	0.163527723806832
C16orf57	880.502798084033	0.0818741956597965	0.0923920491811373	0.886160620804932	0.375530980359999	0.588171595578216
C16orf58	1762.56319491797	-0.00095721626511947	0.074416475303369	-0.012862961611891	0.989737124533133	0.995448890473836
C16orf59	73.4773961597164	-0.905605497723174	0.257182749857818	-3.52125287650059	0.000429512804237428	0.00707928436828361
C16orf61	406.115303574153	0.183287917037726	0.105949718147981	1.72995190776936	0.0836388679949036	0.230673945442386
C16orf62	1549.87964413466	0.157040028739194	0.058428784423907	2.68771685544324	0.00719423714079467	0.0462806148558848
C16orf63	579.889507767525	0.290775823152294	0.0626240980915244	4.64319378663672	3.43064297337566e-06	0.000263631717723253
C16orf68	182.610946708879	-0.286419146226497	0.108039363848433	-2.65106287212419	0.0080238903351355	0.0500123383037804
C16orf7	800.204051863854	-0.408689065415934	0.117039586078927	-3.49188748104705	0.000479620243786644	0.00755785458788688
C16orf70	469.585458188992	-0.0875331894557698	0.0838209326631916	-1.04428794424771	0.29635218890606	0.51423381848005
C16orf71	35.9333661916952	1.01421543594382	0.267761493560032	3.78775686697624	0.000152013494636572	0.00350311691851704
C16orf72	870.122302765325	0.0233236248194472	0.0656845254527547	0.355085534358063	0.722525513359727	0.855892870964073
C16orf73	1.51571055990685	-1.02113533976988	0.603067877158261	-1.6932345071696	0.0904108387468375	0.243123628285574
C16orf74	25.6510222321853	0.436852088873223	0.320800527734537	1.36175614160685	0.173274857015999	0.368999109292006
C16orf75	76.0791363479902	-0.437985019220251	0.299716683131496	-1.46133012898749	0.143924865325212	0.327935182707294
C16orf78	0	NA	NA	NA	NA	NA
C16orf79	82.3585249285518	-0.513624150457326	0.263559604231244	-1.9487969408494	0.0513196792493877	0.169238459048788
C16orf80	826.861952130607	0.0157642129126746	0.0933728607728812	0.168830779973843	0.865929746924794	0.936666789533304
C16orf81	1.90237460034395	0.469931636086563	0.55679447711327	0.84399478695074	0.398672318675044	0.609032846352445
C16orf82	0.232233084677136	0.436234658120797	2.49676595715938	0.174719883884155	0.861299743021127	NA
C16orf86	117.220602940619	-0.00789622734587259	0.156806972943069	-0.0503563534048926	0.959838417168232	0.98239522178948
C16orf87	155.637781644461	-0.210636110919918	0.139275218581661	-1.5123732209145	0.130438943436977	0.306929217597974
C16orf88	364.543034341831	0.0838261391338943	0.133051136678521	0.630029485102675	0.528675293311698	0.718675470542104
C16orf89	250.15058779848	1.23160963017956	0.34335107318134	3.58702717532816	0.000334469477611956	0.00592121724024801
C16orf90	0.0101888479899782	0	5.23039083411357	0	1	NA
C16orf91	204.687209380935	0.0175588210972285	0.0993908237834536	0.176664408532165	0.859771998956351	0.933431146847377
C16orf92	1.81019932570994	-0.247768604973455	0.429940729185521	-0.57628549275345	0.564422226967674	0.746776579010575
C16orf93	88.8921031377731	0.0428838684507514	0.203280132920135	0.210959466794523	0.832918900340183	0.920109820980291
C17orf100	176.713386142238	-0.301904571325945	0.120833023673113	-2.49852699327199	0.0124710644387843	0.0676688837471993
C17orf101	271.324868454981	0.124338089982788	0.121616630712779	1.02237736117223	0.306602331148426	0.523681907172396
C17orf102	13.5445348848583	0.701328773684839	0.33310230733538	2.10544555903876	0.0352525415431169	0.132257709582376
C17orf103	378.262631463347	0.0222042562297449	0.0902959276250843	0.245905400318148	0.805755463323397	0.905320770834281
C17orf104	28.405682059469	-0.202247182379984	0.155043337053997	-1.3044558135997	0.192078215787598	0.393164539134044
C17orf105	0.0151939055243267	0.145959742768063	5.23039083411357	0.0279060872117026	0.977737053442699	NA
C17orf106	190.905922820686	0.12285055162373	0.155080369697995	0.792173450856289	0.428259546693328	0.636601072054181
C17orf107	25.1106401561967	-0.217987112280238	0.298421377979095	-0.730467481104884	0.465104483285715	0.667905192336985
C17orf108	466.863617387205	0.222413446178072	0.158954650228691	1.39922579086602	0.16174528487803	0.353402638235327
C17orf28	636.958262948624	-0.264349905794372	0.196681430838132	-1.34405116267397	0.178931843018533	0.375838383501842
C17orf37	785.337427977451	0.200277203003921	0.100620595125066	1.99041958313789	0.0465447344353478	0.158937982266697
C17orf39	375.660389954551	-0.017028335616192	0.0605611246465852	-0.281176013747495	0.778575401082221	0.88958843958956
C17orf42	122.998269491768	0.161597413580556	0.087781467375827	1.84090581316775	0.0656353623834629	0.19809585202743
C17orf44	29.5818588901782	0.66997732998313	0.152382577813792	4.39667932906231	1.09919550650551e-05	0.000581345105823004
C17orf46	0.40974562508429	0.213372414985694	0.693014521503669	0.307890251019168	0.758165844253367	0.877249740130239
C17orf47	1.67739571329821	-0.132033940905877	0.416582769784443	-0.316945275903267	0.751285126477471	0.87371674205196
C17orf48	112.435659831534	0.0278325963496116	0.0914590519506418	0.304317568966625	0.760885961412099	0.879265558647411
C17orf49	1030.94479077247	0.15469685079383	0.131205237528966	1.17904478287063	0.238380343960851	0.450458401327001
C17orf50	1.69299986502649	-0.413582537987033	0.402508045218578	-1.0275137178002	0.304178629388475	0.521772404241492
C17orf51	740.927488111964	-0.444812287598696	0.147681830353116	-3.0119635335987	0.00259563776781082	0.0234975783162525
C17orf53	40.6250197838168	-0.119376341599204	0.237143863911596	-0.503392074456988	0.614688642739266	0.783408566033029
C17orf54	0.0413724392002586	0.0755836155669676	4.74553483252683	0.0159273123545322	0.987292380656124	NA
C17orf55	3.15946360303878	-0.490918607026103	0.458874764721213	-1.06983134564909	0.284695230236322	0.501890557648867
C17orf56	348.628354852115	-0.405106498172458	0.137825951849623	-2.93926138536272	0.00328995488288036	0.0275162645134672
C17orf57	13.7857745835169	-0.362170268513476	0.260146529513824	-1.39217797442972	0.163868510771969	0.356353073007806
C17orf58	208.206799854593	0.128319813453207	0.102294619684154	1.25441410163514	0.209691529610419	0.415776059703887
C17orf59	276.763375686273	-0.136002619048461	0.123962444921335	-1.09712759485154	0.272585618860528	0.488971507103212
C17orf60	37.0907017326168	0.563263757300979	0.26315872859822	2.1403954955298	0.0323228182531488	0.125214065986642
C17orf61	394.220280486547	0.302677439809215	0.143014857506642	2.11640556153516	0.0343103294770363	0.129696940226207
C17orf62	1434.65693560071	0.0899082140313191	0.102921294657143	0.873562796997709	0.382356393863542	0.59406170847807
C17orf63	669.001481677484	-0.0495477410335751	0.0864870061410915	-0.572892313473597	0.566717609349421	0.748685454629295
[truncated: 18,502 more rows]

## Sheet: DEG
gene_name	baseMean	log2FoldChange	lfcSE	stat	pvalue	padj
ACCN3	144.242580202512	-1.33734	0.254764249211024	-5.24933422875076	1.52649895590826e-07	3.15512e-05
ADAM6	333.278125892423	3.49719	0.599899378599229	5.82963068315689	5.55501794358534e-09	2.85401e-06
AGA	365.658488546249	0.757778	0.147871220260919	5.12458243633833	2.9819786126159e-07	4.91944e-05
ALDH1A3	113.89350643356	3.42841	0.646055878300084	5.30667519861301	1.1164285300402e-07	2.50945e-05
ALDH3A1	17.0957285449082	3.15678	0.480097824565271	6.57528551923648	4.85598948159839e-11	6.71695e-08
ANG	64.3744841906895	1.8866	0.264556848686227	7.13117106333836	9.95185416996233e-13	1.87526e-09
ANGPTL7	2.40293194415933	3.51131	0.671528696284134	5.22882956864605	1.70586527374415e-07	3.40832e-05
ANXA1	2785.08015790617	2.31972	0.378242210512922	6.13289023656691	8.62966916418467e-10	6.7469e-07
ANXA2	2042.97850276768	1.75361	0.297620304827845	5.89209350129399	3.81333289737837e-09	2.07792e-06
ANXA2P2	712.857777787946	1.86063	0.330079681520859	5.63690257287066	1.7313599831006e-08	5.87421e-06
ARHGAP18	260.226708994172	1.17945	0.22688925755987	5.19833883476302	2.01077353502081e-07	3.76643e-05
BBS12	123.862411422856	0.606797	0.122224954851351	4.96459552728032	6.88443943052887e-07	8.71803e-05
BCKDHB	660.981169088327	0.907681	0.159568146499963	5.68836171413966	1.2826391629676e-08	5.12543e-06
BTBD17	487.674167818923	-1.70909	0.29451246464108	-5.80312564148506	6.50899799524022e-09	3.20169e-06
C12orf72	58.9179562032226	0.615831	0.109782097578821	5.60957453010855	2.02824636055479e-08	6.51284e-06
C1orf88	476.712941995898	1.61991	0.311220366022863	5.20502616090178	1.93969278452381e-07	3.67153e-05
C1R	2898.42878515915	2.36509	0.327563319254718	7.22024181876158	5.18952081277043e-13	1.33311e-09
C1RL	372.965379757834	1.58709	0.280498588846349	5.65810124401816	1.53056841798102e-08	5.53865e-06
C1S	2347.95916431164	2.37457	0.328014823449332	7.23921925137252	4.51274993677842e-13	1.33311e-09
C20orf30	1872.54052547716	0.652598	0.067243213240691	9.70503287720607	2.86983771516727e-22	2.58027e-18
C21orf125	9.40069106135387	-1.70729	0.332227096643199	-5.13893163214832	2.76304897060787e-07	4.87109e-05
C2orf40	104.938475885578	2.50973	0.419079814713708	5.98867580212579	2.11556383191361e-09	1.25404e-06
C7orf57	67.0583065349831	3.44374	0.593634328209217	5.80110721093229	6.58784606024505e-09	3.20169e-06
CAPS	798.690308684859	2.03914	0.365939882876787	5.57234086614232	2.51339040514477e-08	7.6603e-06
CASC1	54.8570646199493	1.94722	0.311796889667675	6.24515714283448	4.23374248696927e-10	4.0069e-07
CCDC144C	38.3022782727415	-1.52522	0.303321553421267	-5.02839895510564	4.94592021398406e-07	6.89438e-05
CCDC89	44.0741544989751	1.55437	0.313790751070798	4.95353236604049	7.28782295266403e-07	9.07325e-05
CD109	315.941474356528	1.46403	0.285573936553189	5.12663697991974	2.94963472606023e-07	4.91114e-05
CD59	7077.36041212118	0.791144	0.153864448689237	5.14182526154518	2.72082114237622e-07	4.84414e-05
CEACAM19	82.4449379590091	-1.66724	0.277726577111509	-6.00316116221652	1.9351236540751e-09	1.24276e-06
CECR2	288.025032512301	-0.890146	0.179498711749545	-4.95906618099198	7.0832835645133e-07	8.90711e-05
COL21A1	58.9822869416106	2.34971	0.466488078985874	5.03702854740461	4.72814286720841e-07	6.6946e-05
COL7A1	305.396417531634	-1.85082	0.325663518803278	-5.68322924698093	1.32174904312507e-08	5.12685e-06
CP	1168.51612339027	2.4649	0.446128569079875	5.52508098697529	3.29333660471435e-08	9.55174e-06
CPXM2	127.06407170004	2.50446	0.463522740112157	5.40310023501222	6.54988336323555e-08	1.59162e-05
CTBS	277.374115821031	0.842422	0.16677083924494	5.05137339308142	4.38644639127225e-07	6.41277e-05
CTNNA1	6558.67547815326	0.591697	0.0989463257474596	5.97998122843119	2.23163335655462e-09	1.25404e-06
CYBRD1	2120.4238236529	1.19044	0.189122857530913	6.29451889789383	3.08354711534901e-10	3.08046e-07
DDIT4L	165.837985575684	2.57294	0.511480584796424	5.03037677252808	4.89516922827493e-07	6.87695e-05
DNAH11	30.5068517099857	3.16877	0.620493781238586	5.10684669093395	3.27579308997194e-07	5.2594e-05
DOT1L	1277.2566905356	-1.05204	0.198901539285464	-5.28927208088307	1.22804101184809e-07	2.67563e-05
DSG2	47.5125640346835	3.73224	0.705762431738261	5.28823849133863	1.23499890693807e-07	2.67563e-05
ECM2	692.028921906122	1.79161	0.297653975564603	6.0190991842934	1.75390380794985e-09	1.21303e-06
EN1	50.7059552291245	4.19446	0.787584274482974	5.32572365134395	1.00551907698876e-07	2.31811e-05
ENPP1	64.8011905670113	1.69572	0.303153275741965	5.59360605012231	2.224012740667e-08	6.89521e-06
FILIP1L	422.360427598881	1.73478	0.299681749220384	5.78872798271215	7.09214410847266e-09	3.27002e-06
FLNC	2122.6649860649	1.89128	0.372404776319924	5.07857309159579	3.80280131443047e-07	5.79508e-05
FNDC8	16.1296183546912	-0.851237	0.170390554817317	-4.9958009339025	5.85920765982114e-07	7.80446e-05
FOXJ1	636.885310784561	1.92397	0.383763145649376	5.01343526833757	5.34667599446432e-07	7.28363e-05
FSTL1	2454.80108417288	1.17134	0.217588416833875	5.3832857050207	7.3138308923265e-08	1.73049e-05
GBA	1112.41325820738	0.592391	0.112796864637045	5.2518353017525	1.50591090457585e-07	3.14875e-05
GMPR	578.212365924256	2.00282	0.356552334591488	5.6171851791012	1.94093376100647e-08	6.41039e-06
GOLPH3L	451.800763568294	0.598795	0.0916744195630331	6.5317613028501	6.50006937221984e-11	8.34887e-08
GPR55	15.400301828899	2.47782	0.367156104482664	6.74868693319428	1.49189100988466e-11	2.2356e-08
GYG1	1416.57873531815	0.719895	0.139577340497758	5.15768036584195	2.50027960604807e-07	4.5855e-05
HDAC4	1297.62111143895	-0.65997	0.126578668376965	-5.21391149431256	1.84899712200622e-07	3.57513e-05
HIC2	198.100480133713	-0.639713	0.122070548004975	-5.24051840142391	1.60126118370932e-07	3.23527e-05
HLA-DRA	9738.25844543123	1.66419	0.318539081257618	5.22443553563954	1.74687171008723e-07	3.4519e-05
HLA-G	54.9670676359021	1.67773	0.335725825955094	4.99731179154132	5.81350318103735e-07	7.80137e-05
HOTAIR	9.61467769614542	15.8278	1.50978025077665	10.4835124568923	1.02851382095243e-25	1.84947e-21
IGJ	28.4651481927328	4.23068	0.657820786999356	6.4313584308278	1.26468539404055e-10	1.33774e-07
INSRR	8.16680679119637	3.40024	0.599463994674116	5.6721351298687	1.41028661784366e-08	5.28329e-06
KCNJ8	257.98014208672	1.26208	0.194548364945343	6.48725235606552	8.74158552604103e-11	9.82445e-08
KDM4B	1720.1930255803	-0.586943	0.119039118576768	-4.93067099182286	8.19476505001975e-07	9.95664e-05
LAX1	6.23662195815743	2.03361	0.399790699519422	5.08669209442458	3.64362654008899e-07	5.69736e-05
LOC100133545	23.0875119038136	-1.52164	0.308267365588483	-4.93610541083281	7.96980427331343e-07	9.74919e-05
LOC644538	120.907330191214	1.61967	0.270754067338595	5.98205302715007	2.20342509386764e-09	1.25404e-06
LOC90834	21.0587664311132	-1.22883	0.243394179743566	-5.0487054017252	4.44814050323293e-07	6.45052e-05
LOH12CR2	127.889975047904	0.884152	0.172332934888589	5.13048630752974	2.88994582214506e-07	4.91114e-05
LTF	2558.97585847096	5.00274	0.770894555738936	6.48952397655968	8.61080030292067e-11	9.82445e-08
LYRM5	732.018097710751	0.646222	0.119355346682518	5.41426818260911	6.15398733017353e-08	1.5159e-05
MANSC1	401.967358864828	0.938423	0.166308743393709	5.64265290301412	1.67449710976554e-08	5.87421e-06
MED21	418.82377546762	0.696108	0.102157630845574	6.81406223347456	9.48806275202584e-12	1.55104e-08
MFAP4	549.226913022583	1.81833	0.301887897874368	6.02319928620543	1.71002673394374e-09	1.21303e-06
MRGPRF	137.98731826343	1.87523	0.356608308519372	5.25852543276788	1.45215104697718e-07	3.07207e-05
MT1E	1317.180898503	1.86809	0.350927528060646	5.3232836499546	1.01910643943494e-07	2.31969e-05
MT1G	193.361343251392	2.08944	0.409702372924367	5.09988586641972	3.39858352278821e-07	5.40826e-05
MT1M	362.998663935873	2.31685	0.426473036545381	5.43257480777762	5.55466546986132e-08	1.40682e-05
NBPF16	60.0160095320656	-1.87958	0.347043628769309	-5.41598338147449	6.09527626129906e-08	1.5159e-05
NCOR2	5989.91409281645	-0.668205	0.127416871431875	-5.24424245036942	1.56925737752355e-07	3.20663e-05
NNMT	198.684294105978	2.2875	0.445642571818826	5.13304129784085	2.85097318619179e-07	4.91114e-05
OVGP1	76.8339544756019	-1.37492	0.228827622436646	-6.00852215670805	1.87222033317446e-09	1.24276e-06
PAX3	20.2568610972515	10.9154	1.42028080418867	7.68537579258154	1.52548544163543e-14	6.15969e-11
PDPN	1369.34822210086	2.21859	0.395087784394347	5.61543439063326	1.96069044238926e-08	6.41039e-06
PIGP	137.85715597842	0.65191	0.127161283755432	5.1266398202138	2.94959024776852e-07	4.91114e-05
PLA2R1	38.8678597740191	2.38801	0.439285243940474	5.43611703959363	5.44541933178458e-08	1.40682e-05
PLAU	322.234436080196	2.22883	0.380188271293175	5.86244887634152	4.56090058522285e-09	2.41218e-06
PLP2	378.696860151645	1.56518	0.287213785244163	5.44951609218497	5.05070534269569e-08	1.37609e-05
PRDX6	4464.32520990558	1.42599	0.179945050346478	7.92456075048199	2.28954198245954e-15	1.37235e-11
PSENEN	996.83316465202	0.662881	0.116686210501123	5.68088205666503	1.34001862273839e-08	5.12685e-06
PYGL	752.75603484545	1.23552	0.222344779537891	5.55677959573699	2.7479739001472e-08	8.18778e-06
RABL3	547.514265766391	0.62782	0.115341668279224	5.44313528862765	5.23508560921442e-08	1.40503e-05
RALBP1	1831.57710977031	0.641343	0.112492239887489	5.70122179080757	1.18951747654162e-08	4.86395e-06
RARRES2	367.255499135577	3.29228	0.545792472631314	6.03211552171564	1.61827022201099e-09	1.21249e-06
RASSF8	824.735608315359	0.917166	0.181500558019102	5.05323932074459	4.34379045584569e-07	6.40246e-05
RHOQ	1712.09964988407	0.747075	0.0973953643715427	7.67053991897646	1.71273852266299e-14	6.15969e-11
RNASE4	235.415957834636	1.86507	0.261604846103455	7.12932248583645	1.00864166793607e-12	1.87526e-09
S100A10	2231.46123313616	1.48131	0.28371025122914	5.22120006318166	1.77767365517495e-07	3.47458e-05
S100A6	5960.25608689109	1.4118	0.274145666935625	5.14983343183535	2.60717894925206e-07	4.68823e-05
SEC11C	1529.46644083807	0.803838	0.159326251199584	5.04523226707897	4.52970767977972e-07	6.46454e-05
SERPINA5	107.432126085303	4.04574	0.567845326662343	7.12472933943999	1.04285411863116e-12	1.87526e-09
SERPING1	2269.13553193312	1.96578	0.32030097859399	6.1373032194029	8.3934088513689e-10	6.7469e-07
SETD5	3794.88025336679	-0.650215	0.130687751399699	-4.97533298379655	6.51355739949069e-07	8.3662e-05
SFRP4	481.031970338251	2.30636	0.385567684993427	5.98172714652522	2.20783893796249e-09	1.25404e-06
SH2D4A	49.9081889932534	2.21183	0.438324845882806	5.0460997886484	4.50919963311531e-07	6.46454e-05
SIL1	552.310219496497	0.764571	0.149657372950574	5.10881081960821	3.2419274896666e-07	5.25298e-05
SLC47A2	205.32517047247	3.05338	0.561397509314925	5.43888698210686	5.36144501232745e-08	1.40682e-05
SLIT2	108.703945334064	2.47054	0.467017563957504	5.29003235569972	1.22294723615176e-07	2.67563e-05
SOD2	7755.13569082143	1.62078	0.282827013144338	5.73065676947698	1.00042517725065e-08	4.28698e-06
SQRDL	266.722742584256	1.05524	0.207591484815256	5.08327486499511	3.70982240601206e-07	5.75086e-05
ST6GALNAC2	72.7835601924884	2.08311	0.377914299660028	5.5121096185175	3.54557970960453e-08	9.96197e-06
STEAP3	650.814091273742	1.73303	0.34782900750664	4.98243358516078	6.27895448181194e-07	8.1682e-05
SUMF1	427.732588921627	0.786652	0.139057120571387	5.65704057902707	1.5400536171064e-08	5.53865e-06
SYTL3	101.591228067769	1.35313	0.234532831268469	5.76946494141691	7.95236195994364e-09	3.57498e-06
TAX1BP3	1287.71831519032	0.901019	0.155549055052392	5.79250958876978	6.93423656250751e-09	3.27002e-06
TBC1D3B	190.10405319903	-1.13925	0.227111190845623	-5.0162621323539	5.2686434035944e-07	7.23212e-05
TCTEX1D1	141.818333394945	2.88039	0.552834611462424	5.21021430107671	1.88622631915533e-07	3.60831e-05
TMEM107	281.171290094407	0.637095	0.111175913898222	5.73050912956053	1.00129638046561e-08	4.28698e-06
TNFRSF11B	76.9067060417728	2.15621	0.415176973934273	5.19346755324047	2.06412930101344e-07	3.82651e-05
TREM1	23.8213055416576	3.05764	0.542384289742407	5.63741279936889	1.72623966893111e-08	5.87421e-06
TTC12	71.1351212121395	1.92092	0.378975072804761	5.06871967155125	4.00500573968485e-07	6.0015e-05
TWSG1	1004.01824908526	0.907797	0.169856343911786	5.34449644565997	9.06687552337617e-08	2.11741e-05
WDR38	46.371848923966	3.50914	0.666352930330786	5.26618196557325	1.39290224775797e-07	2.98181e-05

## Sheet: DAVID_analysis
Category	Term	Count	%	PValue	Genes	List Total	Pop Hits	Pop Total	Fold Enrichment	Bonferroni	Benjamini	FDR
GOTERM_CC_DIRECT	GO:0005615~extracellular space	27	24.324324324324326	1.2846904850934381E-8	C2ORF40, ECM2, CPXM2, GBA, TNFRSF11B, FSTL1, SERPINA5, PLAU, C1RL, ENPP1, CD59, SLIT2, AGA, CTBS, SIL1, ANXA1, ANXA2, CP, PRDX6, SFRP4, ALDH3A1, TWSG1, COL7A1, CD109, SERPING1, ANG, LTF	102	1347	18224	3.5812917594654787	2.2867464675169202E-6	2.28675e-06	2.2482083489135167E-6
GOTERM_CC_DIRECT	GO:0070062~extracellular exosome	38	34.234234234234236	1.4274082103141559E-7	C1S, C1R, GBA, MRGPRF, PYGL, FSTL1, SERPINA5, PLAU, C1RL, CD59, SLIT2, AGA, CTBS, GYG1, S100A10, ANXA1, ANXA2, RARRES2, CYBRD1, RNASE4, SOD2, CP, PRDX6, MFAP4, ALDH1A3, TWSG1, S100A6, SERPING1, HLA-DRA, TAX1BP3, ANG, DSG2, PLP2, ANXA2P2, PLA2R1, RHOQ, CAPS, LTF	102	2811	18224	2.4152733309616985	2.5407545183431246E-5	1.27039e-05	1.2489821840248863E-5
UP_SEQ_FEATURE	signal peptide	42	37.83783783783784	4.913629942212855E-8	C2ORF40, ECM2, C1S, C1R, CPXM2, GBA, TNFRSF11B, TREM1, FSTL1, SERPINA5, PLAU, PDPN, C1RL, CD59, SLIT2, AGA, CTBS, SIL1, OVGP1, BTBD17, RARRES2, INSRR, RNASE4, SOD2, CP, HLA-G, CEACAM19, SUMF1, MFAP4, SFRP4, TWSG1, ANGPTL7, COL7A1, CD109, SERPING1, COL21A1, HLA-DRA, MANSC1, ANG, DSG2, PLA2R1, LTF	107	3346	20063	2.3536151409689907	2.3437740756637737E-5	2.34872e-05	2.3487151123777447E-5
UP_KEYWORDS	Secreted	29	26.126126126126124	5.670811105117626E-7	C2ORF40, ECM2, CPXM2, TNFRSF11B, TREM1, FSTL1, SERPINA5, PLAU, C1RL, ENPP1, CD59, SLIT2, ANXA1, BTBD17, ANXA2, RARRES2, RNASE4, CP, MFAP4, SFRP4, TWSG1, ANGPTL7, COL7A1, SERPING1, COL21A1, ANG, ANXA2P2, PLA2R1, LTF	108	1965	20581	2.8124069361982853	1.1681191884516107E-4	6.34222e-05	5.911198324673915E-5
UP_KEYWORDS	Signal	45	40.54054054054054	6.157498254868662E-7	C2ORF40, ECM2, ST6GALNAC2, C1S, C1R, CPXM2, GBA, C7ORF57, TNFRSF11B, TREM1, FSTL1, SERPINA5, PLAU, PDPN, C1RL, CTNNA1, CD59, SLIT2, AGA, CTBS, SIL1, OVGP1, BTBD17, RARRES2, BCKDHB, INSRR, RNASE4, CP, HLA-G, CEACAM19, SUMF1, MFAP4, SFRP4, TWSG1, ANGPTL7, COL7A1, CD109, SERPING1, COL21A1, HLA-DRA, MANSC1, ANG, DSG2, PLA2R1, LTF	108	4160	20581	2.0613982371794872	1.268364586733961E-4	6.34222e-05	5.911198324673915E-5
UP_KEYWORDS	Glycoprotein	46	41.44144144144144	2.943094263747366E-6	STEAP3, ECM2, ST6GALNAC2, C1S, C1R, CPXM2, GBA, MRGPRF, TNFRSF11B, TREM1, FSTL1, SERPINA5, PLAU, PDPN, C1RL, TMEM107, ENPP1, CD59, SLIT2, AGA, CTBS, GYG1, SIL1, OVGP1, BTBD17, GPR55, INSRR, CYBRD1, CP, HLA-G, CEACAM19, SUMF1, MFAP4, SFRP4, TWSG1, ANGPTL7, COL7A1, CD109, SERPING1, COL21A1, HLA-DRA, MANSC1, DSG2, PLP2, PLA2R1, LTF	108	4551	20581	1.9261660034017758	6.060945609396295E-4	0.000202092	1.8835803287983141E-4
UP_SEQ_FEATURE	glycosylation site:N-linked (GlcNAc...)	44	39.63963963963964	4.161425013666049E-6	STEAP3, ECM2, ST6GALNAC2, C1S, C1R, CPXM2, GBA, MRGPRF, TNFRSF11B, TREM1, FSTL1, SERPINA5, PLAU, C1RL, TMEM107, ENPP1, CD59, SLIT2, AGA, CTBS, SIL1, OVGP1, BTBD17, GPR55, INSRR, CYBRD1, CP, HLA-G, CEACAM19, SUMF1, MFAP4, SFRP4, TWSG1, ANGPTL7, COL7A1, CD109, SERPING1, COL21A1, HLA-DRA, MANSC1, DSG2, PLP2, PLA2R1, LTF	107	4234	20063	1.9485606063950485	0.0019830350445101397	0.000994581	9.945805782661857E-4
GOTERM_CC_DIRECT	GO:0005576~extracellular region	23	20.72072072072072	5.7615198477003106E-5	OVGP1, ANXA1, BTBD17, C1S, C1R, RARRES2, TNFRSF11B, RNASE4, TREM1, CP, FSTL1, SERPINA5, MFAP4, SFRP4, ANGPTL7, PLAU, COL7A1, SERPING1, COL21A1, ANG, SLIT2, PLA2R1, LTF	102	1610	18224	2.5523809523809526	0.010203389378604988	0.0034185	0.0033608865778251814
KEGG_PATHWAY	hsa04610:Complement and coagulation cascades	6	5.405405405405405	9.703696766225454E-5	C1S, PLAU, C1R, SERPING1, CD59, SERPINA5	48	69	6879	12.46195652173913	0.008214616581923684	0.00824814	0.008248142251291635
GOTERM_CC_DIRECT	GO:0009986~cell surface	12	10.81081081081081	2.0614618369880317E-4	SFRP4, ANXA1, ANXA2, PLAU, CD109, HLA-DRA, ENPP1, DSG2, CD59, SLIT2, PLA2R1, LTF	102	542	18224	3.9557195571955717	0.03603260097710481	0.00917351	0.00901889553682264
UP_KEYWORDS	Oxidoreductase	12	10.81081081081081	2.2425084070906655E-4	ALDH3A1, ALDH1A3, KDM4B, STEAP3, BCKDHB, CYBRD1, GMPR, SQRDL, SOD2, PRDX6, CP, SUMF1	108	582	20581	3.9291714394807173	0.04514984222929441	0.0115489	0.010764040354035194
UP_KEYWORDS	Copper	5	4.504504504504505	3.6635762584333846E-4	STEAP3, MT1M, MT1G, CP, MT1E	108	65	20581	14.658831908831909	0.0727049680612557	0.0150939	0.014068132832384197
UP_KEYWORDS	Complement pathway	4	3.6036036036036037	5.523669362783449E-4	C1S, C1R, C1RL, SERPING1	108	31	20581	24.58900836320191	0.10758055464010219	0.0189646	0.017675741960907036
UP_KEYWORDS	Cadmium	3	2.7027027027027026	9.41312861943716E-4	MT1M, MT1G, MT1E	108	9	20581	63.5216049382716	0.17634355531266954	0.0277015	0.02581886707045621
GOTERM_CC_DIRECT	GO:0042383~sarcolemma	5	4.504504504504505	0.0012758959997749067	ANXA1, KCNJ8, ANXA2, CD59, FLNC	102	85	18224	10.509803921568627	0.20328200454565126	0.0454219	0.04465635999212174
UP_KEYWORDS	Annexin	3	2.7027027027027026	0.00233937640089312	ANXA1, ANXA2, ANXA2P2	108	14	20581	40.83531746031746	0.38274688579861527	0.0461808	0.04304227212208871
UP_KEYWORDS	Polymorphism	78	70.27027027027027	0.002675721010118378	SETD5, STEAP3, ECM2, C2ORF40, SH2D4A, CPXM2, MT1M, PIGP, MRGPRF, PYGL, SQRDL, TREM1, CASC1, SERPINA5, PLAU, C1RL, ENPP1, CTBS, SIL1, WDR38, OVGP1, RALBP1, ANXA2, INSRR, BCKDHB, PAX3, RNASE4, SYTL3, SUMF1, FNDC8, NCOR2, SFRP4, ALDH3A1, ALDH1A3, ANGPTL7, BBS12, CD109, S100A6, COL21A1, SERPING1, TAX1BP3, ANG, DSG2, PLA2R1, LTF, HDAC4, SLC47A2, C1S, C1R, GBA, DOT1L, GMPR, ARHGAP18, C7ORF57, TNFRSF11B…	108	12043	20581	1.234248572245749	0.42416681689853697	0.0461808	0.04304227212208871
UP_KEYWORDS	Disulfide bond	31	27.927927927927925	0.0021924903689999834	ST6GALNAC2, C1S, C1R, CPXM2, GBA, TNFRSF11B, TREM1, FSTL1, PLAU, C1RL, ENPP1, CD59, SLIT2, AGA, ANXA1, RARRES2, INSRR, RNASE4, CP, PRDX6, HLA-G, SUMF1, SFRP4, ANGPTL7, COL7A1, CD109, SERPING1, HLA-DRA, ANG, PLA2R1, LTF	108	3434	20581	1.7202997260510364	0.3637405530383464	0.0461808	0.04304227212208871
UP_KEYWORDS	Metal-thiolate cluster	3	2.7027027027027026	0.00233937640089312	MT1M, MT1G, MT1E	108	14	20581	40.83531746031746	0.38274688579861527	0.0461808	0.04304227212208871
UP_KEYWORDS	Calcium/phospholipid-binding	3	2.7027027027027026	0.002690142007630544	ANXA1, ANXA2, ANXA2P2	108	15	20581	38.11296296296296	0.42587950901577876	0.0461808	0.04304227212208871
UP_KEYWORDS	Immunity	9	8.108108108108109	0.004587193565499834	ANXA1, C1S, C1R, C1RL, HLA-DRA, SERPING1, LAX1, HLA-G, LTF	108	500	20581	3.4301666666666666	0.612149718778108	0.0726894	0.06774932035199756
GOTERM_MF_DIRECT	GO:0005509~calcium ion binding	13	11.711711711711711	4.124083603238321E-4	ANXA1, C1S, ANXA2, C1R, FSTL1, SYTL3, S100A6, ENPP1, DSG2, SLIT2, ANXA2P2, CAPS, S100A10	91	717	16881	3.3634190077704718	0.08562185985611404	0.0894926	0.08949261419027156
INTERPRO	IPR018252:Annexin repeat, conserved site	3	2.7027027027027026	0.002557114934618733	ANXA1, ANXA2, ANXA2P2	102	14	18559	38.98949579831933	0.5154769879266596	0.0904579	0.08917938334482832
INTERPRO	IPR003019:Metallothionein superfamily, eukaryotic	3	2.7027027027027026	0.002557114934618733	MT1M, MT1G, MT1E	102	14	18559	38.98949579831933	0.5154769879266596	0.0904579	0.08917938334482832
INTERPRO	IPR018502:Annexin repeat	3	2.7027027027027026	0.002557114934618733	ANXA1, ANXA2, ANXA2P2	102	14	18559	38.98949579831933	0.5154769879266596	0.0904579	0.08917938334482832
INTERPRO	IPR001464:Annexin	3	2.7027027027027026	0.002557114934618733	ANXA1, ANXA2, ANXA2P2	102	14	18559	38.98949579831933	0.5154769879266596	0.0904579	0.08917938334482832
INTERPRO	IPR023587:Metallothionein domain, vertebrate	3	2.7027027027027026	0.002557114934618733	MT1M, MT1G, MT1E	102	14	18559	38.98949579831933	0.5154769879266596	0.0904579	0.08917938334482832
INTERPRO	IPR018064:Metallothionein, vertebrate, metal binding site	3	2.7027027027027026	0.0015620491584032324	MT1M, MT1G, MT1E	102	11	18559	49.62299465240642	0.3575109668901494	0.0904579	0.08917938334482832
INTERPRO	IPR000006:Metallothionein, vertebrate	3	2.7027027027027026	0.002557114934618733	MT1M, MT1G, MT1E	102	14	18559	38.98949579831933	0.5154769879266596	0.0904579	0.08917938334482832
INTERPRO	IPR017854:Metallothionein domain	3	2.7027027027027026	0.002557114934618733	MT1M, MT1G, MT1E	102	14	18559	38.98949579831933	0.5154769879266596	0.0904579	0.08917938334482832
UP_KEYWORDS	Serine protease	5	4.504504504504505	0.006319224354894217	C1S, PLAU, C1R, C1RL, LTF	108	141	20581	6.757617546624639	0.7290688866341781	0.0929829	0.08666364829569212
GOTERM_MF_DIRECT	GO:0008201~heparin binding	6	5.405405405405405	0.0016517709077630569	ECM2, ANG, SLIT2, FSTL1, SERPINA5, LTF	91	160	16881	6.956456043956044	0.30143750851837425	0.119478	0.11947809566152777
GOTERM_MF_DIRECT	GO:0004859~phospholipase inhibitor activity	3	2.7027027027027026	0.001498431736517946	ANXA1, ANXA2, ANXA2P2	91	11	16881	50.592407592407596	0.27776416001995774	0.119478	0.11947809566152777
UP_KEYWORDS	Extracellular matrix	6	5.405405405405405	0.011240869607109655	MFAP4, ECM2, ANXA2, COL7A1, COL21A1, ANXA2P2	108	258	20581	4.431739879414297	0.9025808315988659	0.136213	0.12695570379794435
UP_KEYWORDS	Heparin-binding	4	3.6036036036036037	0.010889585560436708	SLIT2, FSTL1, SERPINA5, LTF	108	88	20581	8.662037037037038	0.895184968105375	0.136213	0.12695570379794435
UP_KEYWORDS	Serine protease inhibitor	4	3.6036036036036037	0.010231609884056574	COL7A1, CD109, SERPING1, SERPINA5	108	86	20581	8.863479758828595	0.8797964106640348	0.136213	0.12695570379794435
KEGG_PATHWAY	hsa04978:Mineral absorption	4	3.6036036036036037	0.003253886128841788	MT1M, CYBRD1, MT1G, MT1E	48	44	6879	13.02840909090909	0.24196921438617458	0.13829	0.138290160475776
UP_SEQ_FEATURE	metal ion-binding site:Divalent metal cation; cluster B	3	2.7027027027027026	0.0024141433443445564	MT1M, MT1G, MT1E	107	14	20063	40.17957276368492	0.6842923385012789	0.164852	0.16485150265667114
UP_SEQ_FEATURE	region of interest:Alpha	3	2.7027027027027026	0.002076410636760115	MT1M, MT1G, MT1E	107	13	20063	43.270309130122214	0.6289719406774722	0.164852	0.16485150265667114
UP_SEQ_FEATURE	region of interest:Beta	3	2.7027027027027026	0.002076410636760115	MT1M, MT1G, MT1E	107	13	20063	43.270309130122214	0.6289719406774722	0.164852	0.16485150265667114
UP_SEQ_FEATURE	metal ion-binding site:Divalent metal cation; cluster A	3	2.7027027027027026	0.0024141433443445564	MT1M, MT1G, MT1E	107	14	20063	40.17957276368492	0.6842923385012789	0.164852	0.16485150265667114
UP_SEQ_FEATURE	disulfide bond	28	25.225225225225223	0.0021228995507886666	ST6GALNAC2, C1S, C1R, CPXM2, GBA, TNFRSF11B, TREM1, FSTL1, PLAU, C1RL, ENPP1, CD59, SLIT2, AGA, INSRR, RNASE4, CP, PRDX6, HLA-G, SUMF1, SFRP4, ANGPTL7, COL7A1, SERPING1, HLA-DRA, ANG, PLA2R1, LTF	107	2917	20063	1.7998391639086373	0.6371259439305964	0.164852	0.16485150265667114
UP_KEYWORDS	Calcium	11	9.90990990990991	0.015949148416715533	MFAP4, ANXA1, C1S, ANXA2, C1R, S100A6, ENPP1, DSG2, ANXA2P2, CAPS, SUMF1	108	877	20581	2.390208623674986	0.9635570477938482	0.182529	0.170124249778299
GOTERM_MF_DIRECT	GO:0005544~calcium-dependent phospholipid binding	4	3.6036036036036037	0.0036589502008367225	ANXA1, ANXA2, ANXA2P2, SYTL3	91	58	16881	12.793482379689276	0.5486211796350577	0.198498	0.1984980483953922
UP_KEYWORDS	Basement membrane	3	2.7027027027027026	0.018367575750255185	ANXA2, COL7A1, ANXA2P2	108	40	20581	14.292361111111111	0.9780480859518863	0.199143	0.1856091865288945
SMART	SM00335:ANX	3	2.7027027027027026	0.0029426493999889732	ANXA1, ANXA2, ANXA2P2	60	14	10057	35.917857142857144	0.1983026110963806	0.220699	0.220698704999173
UP_KEYWORDS	Protease	8	7.207207207207207	0.023482584465439542	C1S, PLAU, C1R, C1RL, AGA, SERPINA5, LTF, SEC11C	108	544	20581	2.802423747276688	0.9925169513775242	0.241871	0.2254328108682196
UP_KEYWORDS	Pharmaceutical	3	2.7027027027027026	0.024865289881538414	ANXA1, PLAU, GBA	108	47	20581	12.163711583924348	0.9944113000202784	0.243917	0.22733979320263692
GOTERM_CC_DIRECT	GO:0019897~extrinsic component of plasma membrane	3	2.7027027027027026	0.008396539092730684	ANXA2, SYTL3, S100A10	102	25	18224	21.44	0.7770692226455238	0.249097	0.24489905687131164
UP_KEYWORDS	Protease inhibitor	4	3.6036036036036037	0.026928663536866775	COL7A1, CD109, SERPING1, SERPINA5	108	124	20581	6.147252090800477	0.9963875316927285	0.25215	0.23501379086720092
INTERPRO	IPR002389:Annexin, type II	2	1.8018018018018018	0.010854882283996626	ANXA2, ANXA2P2	102	2	18559	181.95098039215685	0.9544400418662616	0.341326	0.3365013508038954
UP_KEYWORDS	Fibrinolysis	2	1.8018018018018018	0.04084957905099919	PLAU, SERPING1	108	8	20581	47.6412037037037	0.9998143629420173	0.36587	0.34100518164312366
UP_KEYWORDS	Innate immunity	5	4.504504504504505	0.047406647388225025	ANXA1, C1S, C1R, C1RL, SERPING1	108	261	20581	3.6506669504753795	0.9999548191291158	0.399719	0.3725534080476296
UP_KEYWORDS	Lysosome	5	4.504504504504505	0.0485095583395351	GBA, HLA-DRA, AGA, PRDX6, CTBS	108	263	20581	3.622905224616251	0.999964411264762	0.399719	0.3725534080476296
UP_KEYWORDS	Hydrolase	15	13.513513513513514	0.05092441617169857	HDAC4, C1S, C1R, GBA, RNASE4, PRDX6, SERPINA5, PLAU, C1RL, ENPP1, ANG, AGA, CTBS, SEC11C, LTF	108	1671	20581	1.7106356805638674	0.9999789154198454	0.403478	0.3760572271140818
INTERPRO	IPR013781:Glycoside hydrolase, catalytic domain	3	2.7027027027027026	0.017255607846786907	OVGP1, GBA, CTBS	102	37	18559	14.752782193958662	0.992744246483579	0.488334	0.48143145892535466
UP_KEYWORDS	Disease mutation	20	18.01801801801802	0.06656677516314898	DNAH11, KCNJ8, GBA, BCKDHB, PAX3, TNFRSF11B, PYGL, SUMF1, ALDH1A3, BBS12, COL7A1, SERPING1, ENPP1, DSG2, CD59, ANG, FLNC, AGA, GYG1, SIL1	108	2550	20581	1.4946259985475672	0.9999993126933093	0.50788	0.4733637344935038
INTERPRO	IPR024175:Peptidase S1A, complement C1r/C1S/mannan-binding	2	1.8018018018018018	0.021593090170175758	C1S, C1R	102	4	18559	90.97549019607843	0.9979249829920165	0.555531	0.5476792870435487
INTERPRO	IPR001314:Peptidase S1A, chymotrypsin-type	4	3.6036036036036037	0.023803286597670368	C1S, PLAU, C1R, C1RL	102	113	18559	6.440742668748915	0.9989058734658277	0.561361	0.5534264133958361
GOTERM_MF_DIRECT	GO:0042803~protein homodimerization activity	10	9.00900900900901	0.015704534499610547	ALDH1A3, ANXA1, S100A6, ENPP1, ANG, SLIT2, PYGL, HLA-G, SUMF1, S100A10	91	730	16881	2.5411711576095137	0.9677722407403907	0.567981	0.5679806644025814
GOTERM_MF_DIRECT	GO:0004867~serine-type endopeptidase inhibitor activity	4	3.6036036036036037	0.015069707402018625	COL7A1, CD109, SERPING1, SERPINA5	91	97	16881	7.64971111362864	0.9629325779622562	0.567981	0.5679806644025814
INTERPRO	IPR017853:Glycoside hydrolase, superfamily	3	2.7027027027027026	0.034934920065516496	OVGP1, GBA, CTBS	102	54	18559	10.10838779956427	0.9999573893484033	0.57431	0.5661924127861288
INTERPRO	IPR000859:CUB domain	3	2.7027027027027026	0.036127068708354894	C1S, C1R, C1RL	102	55	18559	9.924598930481284	0.9999699669886084	0.57431	0.5661924127861288
INTERPRO	IPR001254:Peptidase S1	4	3.6036036036036037	0.027789947526955922	C1S, PLAU, C1R, C1RL	102	120	18559	6.065032679738562	0.9996563547366609	0.57431	0.5661924127861288
INTERPRO	IPR001223:Glycoside hydrolase, family 18, catalytic domain	2	1.8018018018018018	0.03748435008155507	OVGP1, CTBS	102	7	18559	51.98599439775911	0.9999798438636617	0.57431	0.5661924127861288
INTERPRO	IPR011583:Chitinase II	2	1.8018018018018018	0.03748435008155507	OVGP1, CTBS	102	7	18559	51.98599439775911	0.9999798438636617	0.57431	0.5661924127861288
INTERPRO	IPR000436:Sushi/SCR/CCP	3	2.7027027027027026	0.03855790624708404	C1S, C1R, C1RL	102	57	18559	9.576367389060888	0.999985302398054	0.57431	0.5661924127861288
INTERPRO	IPR009003:Trypsin-like cysteine/serine peptidase domain	4	3.6036036036036037	0.03275451457469454	C1S, PLAU, C1R, C1RL	102	128	18559	5.685968137254902	0.9999192970683255	0.57431	0.5661924127861288
GOTERM_CC_DIRECT	GO:0031012~extracellular matrix	6	5.405405405405405	0.024483925571876484	MFAP4, ANXA2, CPXM2, COL7A1, RARRES2, COL21A1	102	296	18224	3.6216216216216215	0.9878736933420015	0.622591	0.6120981392969121
PIR_SUPERFAMILY	PIRSF001155:C1r-like complement-activating serine protease	2	1.8018018018018018	0.03732454300534996	C1S, C1R	17	4	1692	49.76470588235294	0.4762086807486602	0.634517	0.6345172310909493
UP_KEYWORDS	Hydroxylation	3	2.7027027027027026	0.08760367258833866	C1S, C1R, COL7A1	108	95	20581	6.017836257309941	0.9999999937222088	0.644513	0.600710897748608
INTERPRO	IPR023411:Ribonuclease A, active site	2	1.8018018018018018	0.047936275718646365	RNASE4, ANG	102	9	18559	40.43355119825708	0.9999990827598317	0.645998	0.6368676631191589
INTERPRO	IPR003645:Follistatin-like, N-terminal	2	1.8018018018018018	0.047936275718646365	SLIT2, FSTL1	102	9	18559	40.43355119825708	0.9999990827598317	0.645998	0.6368676631191589
GOTERM_MF_DIRECT	GO:0019834~phospholipase A2 inhibitor activity	2	1.8018018018018018	0.021157675894603364	ANXA1, ANXA2	91	4	16881	92.75274725274726	0.9903469517793593	0.655888	0.6558879527327043
GOTERM_CC_DIRECT	GO:0031982~vesicle	4	3.6036036036036037	0.03428906026048912	ANXA1, ANXA2, CD59, CAPS	102	128	18224	5.583333333333333	0.9979918649664573	0.660614	0.6494803310568154
GOTERM_CC_DIRECT	GO:0005886~plasma membrane	32	28.82882882882883	0.03711316177467516	SLC47A2, TBC1D3B, MRGPRF, TNFRSF11B, PYGL, TREM1, PLAU, PDPN, CTNNA1, ENPP1, CD59, SLIT2, FLNC, PSENEN, ANXA1, BTBD17, ANXA2, KCNJ8, GPR55, CYBRD1, LAX1, HLA-G, SYTL3, ALDH3A1, CD109, HLA-DRA, TAX1BP3, DSG2, PLP2, PLA2R1, RHOQ, CAPS	102	4121	18224	1.3873655261667879	0.9988076752451841	0.660614	0.6494803310568154
GOTERM_CC_DIRECT	GO:0012507~ER to Golgi transport vesicle membrane	3	2.7027027027027026	0.03369922457188433	HLA-DRA, CD59, HLA-G	102	52	18224	10.307692307692308	0.9977613077667106	0.660614	0.6494803310568154
GOTERM_MF_DIRECT	GO:0008092~cytoskeletal protein binding	3	2.7027027027027026	0.02705431824264412	ANXA2, ANXA2P2, FLNC	91	48	16881	11.594093406593407	0.9973984924715714	0.733848	0.7338483823317218
GOTERM_MF_DIRECT	GO:0004568~chitinase activity	2	1.8018018018018018	0.036734855572883	OVGP1, CTBS	91	7	16881	53.00156985871272	0.9997029370306545	0.755881	0.7558805041778633
GOTERM_MF_DIRECT	GO:0004030~aldehyde dehydrogenase [NAD(P)+] activity	2	1.8018018018018018	0.03156989501274536	ALDH3A1, ALDH1A3	91	6	16881	61.83516483516483	0.9990519808454751	0.755881	0.7558805041778633
GOTERM_MF_DIRECT	GO:0048306~calcium-dependent protein binding	3	2.7027027027027026	0.03831652325325575	ANXA1, ANXA2, S100A6	91	58	16881	9.595111784766956	0.9997920411199108	0.755881	0.7558805041778633
SMART	SM00636:Glyco_18	2	1.8018018018018018	0.040362032531150345	OVGP1, CTBS	60	7	10057	47.890476190476186	0.9544952569230548	0.756788	0.756788109959069
SMART	SM00042:CUB	3	2.7027027027027026	0.03211791693704333	C1S, C1R, C1RL	60	48	10057	10.476041666666669	0.9135661641103241	0.756788	0.756788109959069
SMART	SM00020:Tryp_SPc	4	3.6036036036036037	0.03182245345890465	C1S, PLAU, C1R, C1RL	60	118	10057	5.681920903954802	0.9115647338633958	0.756788	0.756788109959069
GOTERM_MF_DIRECT	GO:0008061~chitin binding	2	1.8018018018018018	0.041872574132054474	OVGP1, CTBS	91	8	16881	46.37637362637363	0.9999069213711617	0.757196	0.7571957155546517
SMART	SM00274:FOLN	2	1.8018018018018018	0.05159690748635021	SLIT2, FSTL1	60	9	10057	37.24814814814815	0.9811863912628203	0.773954	0.7739536122952531
GOTERM_MF_DIRECT	GO:0004252~serine-type endopeptidase activity	5	4.504504504504505	0.047453386075157936	C1S, PLAU, C1R, C1RL, LTF	91	255	16881	3.637362637362637	0.999973799260554	0.792107	0.7921065214084055
UP_SEQ_FEATURE	region of interest:Connecting peptide	3	2.7027027027027026	0.013895438280936178	PLAU, HLA-DRA, HLA-G	107	34	20063	16.544529961517316	0.9987374294198692	0.830252	0.8302524372859367
GOTERM_CC_DIRECT	GO:0072562~blood microparticle	4	3.6036036036036037	0.0524776970147698	C1S, C1R, SERPING1, CP	102	152	18224	4.701754385964912	0.9999319355174062	0.849185	0.8348724525077014
SMART	SM00092:RNAse_Pc	2	1.8018018018018018	0.07368013787622503	RNASE4, ANG	60	13	10057	25.787179487179486	0.9967857975997427	0.921002	0.9210017234528128
GOTERM_MF_DIRECT	GO:0098641~cadherin binding involved in cell-cell adhesion	5	4.504504504504505	0.06939354953159244	ANXA1, ANXA2, CTNNA1, ARHGAP18, PRDX6	91	290	16881	3.198370594922319	0.9999998331851552	0.94115	0.9411500155222224
GOTERM_MF_DIRECT	GO:0044548~S100 protein binding	2	1.8018018018018018	0.06715748414960793	ANXA2, S100A6	91	13	16881	28.539306846999157	0.9999997191929879	0.94115	0.9411500155222224
GOTERM_MF_DIRECT	GO:0015075~ion transmembrane transporter activity	2	1.8018018018018018	0.062153858997446486	S100A6, PLP2	91	12	16881	30.917582417582416	0.9999991034876516	0.94115	0.9411500155222224
GOTERM_CC_DIRECT	GO:0005765~lysosomal membrane	5	4.504504504504505	0.06602703945796315	ANXA2, GBA, HLA-DRA, ENPP1, CP	102	274	18224	3.2603406326034063	0.9999947578920437	0.974632	0.9582053174903987
GOTERM_CC_DIRECT	GO:0005604~basement membrane	3	2.7027027027027026	0.0711809664421439	ANXA2, COL7A1, ANXA2P2	102	79	18224	6.784810126582279	0.9999980423414166	0.974632	0.9582053174903987
INTERPRO	IPR001427:Ribonuclease A	2	1.8018018018018018	0.07862251310831159	RNASE4, ANG	102	15	18559	24.260130718954247	0.999999999913734	0.995896	0.9818195641499413
INTERPRO	IPR016160:Aldehyde dehydrogenase, conserved site	2	1.8018018018018018	0.08364080075078759	ALDH3A1, ALDH1A3	102	16	18559	22.743872549019606	0.999999999981609	0.995896	0.9818195641499413
INTERPRO	IPR023412:Ribonuclease A-domain	2	1.8018018018018018	0.08863202542996916	RNASE4, ANG	102	17	18559	21.405997693194923	0.9999999999960796	0.995896	0.9818195641499413
INTERPRO	IPR015590:Aldehyde dehydrogenase domain	2	1.8018018018018018	0.09853386306881132	ALDH3A1, ALDH1A3	102	19	18559	19.152734778121776	0.9999999999998219	0.995896	0.9818195641499413
INTERPRO	IPR016161:Aldehyde/histidinol dehydrogenase	2	1.8018018018018018	0.09853386306881132	ALDH3A1, ALDH1A3	102	19	18559	19.152734778121776	0.9999999999998219	0.995896	0.9818195641499413
INTERPRO	IPR016163:Aldehyde dehydrogenase, C-terminal	2	1.8018018018018018	0.09853386306881132	ALDH3A1, ALDH1A3	102	19	18559	19.152734778121776	0.9999999999998219	0.995896	0.9818195641499413
INTERPRO	IPR016162:Aldehyde dehydrogenase, N-terminal	2	1.8018018018018018	0.09853386306881132	ALDH3A1, ALDH1A3	102	19	18559	19.152734778121776	0.9999999999998219	0.995896	0.9818195641499413
UP_SEQ_FEATURE	domain:Peptidase S1	4	3.6036036036036037	0.020090502354359555	C1S, PLAU, C1R, C1RL	107	109	20063	6.880905427420045	0.9999375249986947	1	1.0
GOTERM_BP_DIRECT	GO:0042493~response to drug	6	5.405405405405405	0.03029154949117534	HDAC4, ALDH3A1, NNMT, ANXA1, TNFRSF11B, SOD2	97	304	16792	3.4167118827997833	0.9999999996824009	1	1.0
UP_SEQ_FEATURE	region of interest:Alpha-2	2	1.8018018018018018	0.08129444419277501	HLA-DRA, HLA-G	107	16	20063	23.438084112149532	1.0	1	1.0
UP_SEQ_FEATURE	region of interest:Alpha-1	2	1.8018018018018018	0.08129444419277501	HLA-DRA, HLA-G	107	16	20063	23.438084112149532	1.0	1	1.0
KEGG_PATHWAY	hsa04145:Phagosome	4	3.6036036036036037	0.08224600962719258	C1R, HLA-DRA, PLA2R1, HLA-G	48	150	6879	3.8216666666666668	0.9993212123594976	1	1.0
GOTERM_BP_DIRECT	GO:0045087~innate immune response	7	6.306306306306306	0.03674000465408907	ANXA1, C1S, C1R, C1RL, SERPING1, ANG, TREM1	97	430	16792	2.818125149844162	0.9999999999972353	1	1.0
UP_SEQ_FEATURE	short sequence motif:Cell attachment site	3	2.7027027027027026	0.08366814745323459	MFAP4, ECM2, COL7A1	107	91	20063	6.181472732874601	1.0	1	1.0
UP_SEQ_FEATURE	active site:Nucleophile	4	3.6036036036036037	0.08555772119692946	ALDH1A3, GBA, AGA, LTF	107	196	20063	3.826625977493801	1.0	1	1.0
GOTERM_MF_DIRECT	GO:0004029~aldehyde dehydrogenase (NAD) activity	2	1.8018018018018018	0.08690935418616227	ALDH3A1, ALDH1A3	91	17	16881	21.824175824175825	0.9999999972990601	1	1.0
GOTERM_BP_DIRECT	GO:0007507~heart development	4	3.6036036036036037	0.08745501025292546	DNAH11, KCNJ8, FOXJ1, SOD2	97	183	16792	3.783899498619796	1.0	1	1.0
GOTERM_BP_DIRECT	GO:0055114~oxidation-reduction process	11	9.90990990990991	0.002038460337397357	ALDH3A1, ALDH1A3, KDM4B, STEAP3, BCKDHB, CYBRD1, GMPR, SOD2, PRDX6, CP, SUMF1	97	592	16792	3.216634159933129	0.7656230417087423	1	1.0
GOTERM_BP_DIRECT	GO:0010951~negative regulation of endopeptidase activity	4	3.6036036036036037	0.032132603959436484	COL7A1, CD109, SERPING1, SERPINA5	97	121	16792	5.722757092953906	0.9999999999177612	1	1.0
GOTERM_CC_DIRECT	GO:0001726~ruffle	3	2.7027027027027026	0.089033206475137	ANXA2, PDPN, S100A6	102	90	18224	5.955555555555556	0.9999999381338259	1	0.9887005649717514
UP_SEQ_FEATURE	active site:Proton donor	4	3.6036036036036037	0.08960484085937657	GBA, RNASE4, ANG, CTBS	107	200	20063	3.750093457943925	1.0	1	1.0
GOTERM_CC_DIRECT	GO:0005788~endoplasmic reticulum lumen	4	3.6036036036036037	0.09097409738962484	COL7A1, COL21A1, SIL1, SUMF1	102	192	18224	3.7222222222222223	0.9999999576772356	1	0.9887005649717514
UP_SEQ_FEATURE	domain:VWFC	2	1.8018018018018018	0.09098444725279234	ECM2, FSTL1	107	18	20063	20.833852544132917	1.0	1	1.0
GOTERM_MF_DIRECT	GO:0016491~oxidoreductase activity	4	3.6036036036036037	0.09130077701696303	ALDH3A1, ALDH1A3, SQRDL, SUMF1	91	200	16881	3.7101098901098903	0.9999999990512015	1	1.0
KEGG_PATHWAY	hsa05133:Pertussis	3	2.7027027027027026	0.09264188766659685	C1S, C1R, SERPING1	48	75	6879	5.732500000000001	0.9997422541109586	1	1.0
UP_SEQ_FEATURE	active site:Charge relay system	4	3.6036036036036037	0.09269232409590454	C1S, PLAU, C1R, C1RL	107	203	20063	3.6946733575802218	1.0	1	1.0
GOTERM_BP_DIRECT	GO:0044849~estrous cycle	2	1.8018018018018018	0.09291091662555877	NCOR2, ANXA1	97	17	16792	20.36628259551243	1.0	1	1.0
GOTERM_BP_DIRECT	GO:0071276~cellular response to cadmium ion	2	1.8018018018018018	0.09291091662555877	MT1G, MT1E	97	17	16792	20.36628259551243	1.0	1	1.0
GOTERM_MF_DIRECT	GO:0016620~oxidoreductase activity, acting on the aldehyde or oxo group of donors, NAD or NADP as acceptor	2	1.8018018018018018	0.09662962186223578	ALDH3A1, ALDH1A3	91	19	16881	19.52689415847311	0.9999999997352179	1	1.0
GOTERM_BP_DIRECT	GO:0001765~membrane raft assembly	2	1.8018018018018018	0.03382047065381903	ANXA2, S100A10	97	6	16792	57.70446735395189	0.9999999999762251	1	1.0
GOTERM_BP_DIRECT	GO:0097066~response to thyroid hormone	2	1.8018018018018018	0.03382047065381903	ANXA2, GBA	97	6	16792	57.70446735395189	0.9999999999762251	1	1.0
GOTERM_BP_DIRECT	GO:0010243~response to organonitrogen compound	2	1.8018018018018018	0.07715958278988916	NCOR2, NNMT	97	14	16792	24.730486008836525	1.0	1	1.0
GOTERM_BP_DIRECT	GO:0008360~regulation of cell shape	4	3.6036036036036037	0.04625925085348589	ANXA1, PDPN, ARHGAP18, RHOQ	97	140	16792	4.946097201767305	0.9999999999999977	1	1.0
UP_SEQ_FEATURE	repeat:Annexin 3	2	1.8018018018018018	0.07641114317060156	ANXA1, ANXA2	107	15	20063	25.0006230529595	1.0	1	1.0
UP_SEQ_FEATURE	repeat:Annexin 1	2	1.8018018018018018	0.07641114317060156	ANXA1, ANXA2	107	15	20063	25.0006230529595	1.0	1	1.0
GOTERM_BP_DIRECT	GO:0006959~humoral immune response	3	2.7027027027027026	0.04212811870297848	FOXJ1, TREM1, LTF	97	57	16792	9.111231687466088	0.9999999999999488	1	1.0
GOTERM_BP_DIRECT	GO:0006958~complement activation, classical pathway	4	3.6036036036036037	0.019133350931204742	C1S, C1R, C1RL, SERPING1	97	99	16792	6.994480891388108	0.9999989168531622	1	1.0
UP_SEQ_FEATURE	domain:EGF-like; calcium-binding	2	1.8018018018018018	0.041500582470076715	C1S, C1R	107	8	20063	46.876168224299064	0.9999999983430323	1	1.0
GOTERM_BP_DIRECT	GO:0042730~fibrinolysis	3	2.7027027027027026	0.006328459695326522	ANXA2, PLAU, SERPING1	97	21	16792	24.730486008836525	0.9890436136045957	1	1.0
GOTERM_BP_DIRECT	GO:0045926~negative regulation of growth	3	2.7027027027027026	0.0051915670471078005	MT1M, MT1G, MT1E	97	19	16792	27.333695062398267	0.9752967145334692	1	1.0
GOTERM_BP_DIRECT	GO:1900138~negative regulation of phospholipase A2 activity	2	1.8018018018018018	0.022674681865465358	ANXA1, PLA2R1	97	4	16792	86.55670103092784	0.999999917237171	1	1.0
KEGG_PATHWAY	hsa05150:Staphylococcus aureus infection	3	2.7027027027027026	0.052229247075773075	C1S, C1R, HLA-DRA	48	54	6879	7.961805555555555	0.9895339998986871	1	1.0
GOTERM_BP_DIRECT	GO:0006032~chitin catabolic process	2	1.8018018018018018	0.03934610122789529	OVGP1, CTBS	97	7	16792	49.46097201767305	0.9999999999995972	1	1.0
GOTERM_BP_DIRECT	GO:0043627~response to estrogen	3	2.7027027027027026	0.053326470761642916	GBA, CTNNA1, TNFRSF11B	97	65	16792	7.989849325931801	1.0	1	1.0
GOTERM_BP_DIRECT	GO:0019732~antifungal humoral response	2	1.8018018018018018	0.05573604829962995	ANG, LTF	97	10	16792	34.62268041237113	1.0	1	1.0
GOTERM_BP_DIRECT	GO:0006900~membrane budding	2	1.8018018018018018	0.03934610122789529	ANXA2, S100A10	97	7	16792	49.46097201767305	0.9999999999995972	1	1.0
GOTERM_BP_DIRECT	GO:0051099~positive regulation of binding	2	1.8018018018018018	0.03934610122789529	ANXA2, S100A10	97	7	16792	49.46097201767305	0.9999999999995972	1	1.0
GOTERM_BP_DIRECT	GO:0006935~chemotaxis	4	3.6036036036036037	0.03280983742334538	RALBP1, PLAU, RARRES2, PLP2	97	122	16792	5.675849247929694	0.9999999999500034	1	1.0
GOTERM_BP_DIRECT	GO:0071294~cellular response to zinc ion	3	2.7027027027027026	0.0051915670471078005	MT1M, MT1G, MT1E	97	19	16792	27.333695062398267	0.9752967145334692	1	1.0
GOTERM_BP_DIRECT	GO:0006508~proteolysis	7	6.306306306306306	0.06681789172779673	C1S, PLAU, CPXM2, C1R, C1RL, AGA, LTF	97	500	16792	2.4235876288659792	1.0	1	1.0
GOTERM_BP_DIRECT	GO:0031340~positive regulation of vesicle fusion	2	1.8018018018018018	0.03934610122789529	ANXA1, ANXA2	97	7	16792	49.46097201767305	0.9999999999995972	1	1.0
UP_SEQ_FEATURE	mutagenesis site	18	16.216216216216218	0.06758043649423093	PSENEN, HDAC4, ANXA2, GBA, DOT1L, TNFRSF11B, SOD2, PRDX6, HLA-G, SUMF1, PLAU, PDPN, C1RL, CD59, ANG, FLNC, RHOQ, LTF	107	2191	20063	1.5404309046780158	0.9999999999999968	1	1.0
UP_SEQ_FEATURE	site:Reactive bond	3	2.7027027027027026	0.02361849548273476	COL7A1, SERPING1, SERPINA5	107	45	20063	12.50031152647975	0.9999888179223553	1	1.0
UP_SEQ_FEATURE	sequence variant	76	68.46846846846847	0.03768861941438922	SETD5, STEAP3, ECM2, C2ORF40, SH2D4A, CPXM2, MT1M, PIGP, MRGPRF, PYGL, SQRDL, TREM1, CASC1, SERPINA5, PLAU, C1RL, ENPP1, CTBS, SIL1, WDR38, OVGP1, RALBP1, ANXA2, INSRR, BCKDHB, PAX3, RNASE4, SYTL3, SUMF1, FNDC8, NCOR2, SFRP4, ALDH3A1, ALDH1A3, ANGPTL7, BBS12, CD109, S100A6, COL21A1, SERPING1, ANG, DSG2, PLA2R1, LTF, HDAC4, SLC47A2, C1S, C1R, GBA, DOT1L, GMPR, ARHGAP18, C7ORF57, TNFRSF11B, CECR2, …	107	12443	20063	1.1452507546561854	0.9999999889959728	1	1.0
GOTERM_BP_DIRECT	GO:0045599~negative regulation of fat cell differentiation	3	2.7027027027027026	0.024010677818603568	BBS12, ENPP1, SOD2	97	42	16792	12.365243004418263	0.9999999687073652	1	1.0
GOTERM_BP_DIRECT	GO:0090630~activation of GTPase activity	3	2.7027027027027026	0.07508096586537327	TBC1D3B, FOXJ1, TAX1BP3	97	79	16792	6.573926660576798	1.0	1	1.0
GOTERM_BP_DIRECT	GO:0001666~response to hypoxia	4	3.6036036036036037	0.07577899642793692	ALDH3A1, PLAU, ANG, SOD2	97	172	16792	4.025893071205945	1.0	1	1.0
UP_SEQ_FEATURE	repeat:Annexin 4	2	1.8018018018018018	0.07641114317060156	ANXA1, ANXA2	107	15	20063	25.0006230529595	1.0	1	1.0
UP_SEQ_FEATURE	repeat:Annexin 2	2	1.8018018018018018	0.07641114317060156	ANXA1, ANXA2	107	15	20063	25.0006230529595	1.0	1	1.0
GOTERM_BP_DIRECT	GO:0009268~response to pH	2	1.8018018018018018	0.06650863189389897	KCNJ8, GBA	97	12	16792	28.852233676975946	1.0	1	1.0

## Sheet: DAVID_analysis_UP_DOWN
Category	Term	Count	Benjamini	Gene Up-regulated	Gene Down-regulated
GOTERM_CC_DIRECT	GO:0005615~extracellular space	27	2.28675e-06	C2ORF40, ECM2, CPXM2, TNFRSF11B, FSTL1, SERPINA5, PLAU, C1RL, ENPP1, SLIT2, ANXA1, ANXA2, CP, PRDX6, SFRP4, ALDH3A1, CD109, SERPING1, ANG, LTF	GBA, CD59, AGA, CTBS, SIL1, TWSG1, COL7A1
GOTERM_CC_DIRECT	GO:0070062~extracellular exosome	38	1.27039e-05	C1S, C1R, MRGPRF, PYGL, FSTL1, SERPINA5, PLAU, C1RL, SLIT2, S100A10, ANXA1, ANXA2, RARRES2, CYBRD1, RNASE4, SOD2, CP, PRDX6, MFAP4, ALDH1A3, S100A6, SERPING1, HLA-DRA, ANG, DSG2, PLP2, ANXA2P2, PLA2R1, CAPS, LTF	GBA, CD59, AGA, CTBS, GYG1, TWSG1, TAX1BP3, RHOQ
UP_SEQ_FEATURE	signal peptide	42	2.34872e-05	C2ORF40, ECM2, C1S, C1R, CPXM2, TNFRSF11B, TREM1, FSTL1, SERPINA5, PLAU, PDPN, C1RL, SLIT2, RARRES2, INSRR, RNASE4, SOD2, CP, HLA-G, MFAP4, SFRP4, ANGPTL7, CD109, SERPING1, COL21A1, HLA-DRA, ANG, DSG2, PLA2R1, LTF	GBA, CD59, AGA, CTBS, SIL1, OVGP1, BTBD17, CEACAM19, SUMF1, TWSG1, COL7A1, MANSC1
UP_KEYWORDS	Secreted	29	6.34222e-05	C2ORF40, ECM2, CPXM2, TNFRSF11B, TREM1, FSTL1, SERPINA5, PLAU, C1RL, ENPP1, SLIT2, ANXA1, ANXA2, RARRES2, RNASE4, CP, MFAP4, SFRP4, ANGPTL7, SERPING1, COL21A1, ANG, ANXA2P2, PLA2R1, LTF	CD59, BTBD17, TWSG1, COL7A1
UP_KEYWORDS	Signal	45	6.34222e-05	C2ORF40, ECM2, ST6GALNAC2, C1S, C1R, CPXM2, C7ORF57, TNFRSF11B, TREM1, FSTL1, SERPINA5, PLAU, PDPN, C1RL, SLIT2, RARRES2, INSRR, RNASE4, CP, HLA-G, MFAP4, SFRP4, ANGPTL7, CD109, SERPING1, COL21A1, HLA-DRA, ANG, DSG2, PLA2R1, LTF	GBA, CTNNA1, CD59, AGA, CTBS, SIL1, OVGP1, BTBD17, BCKDHB, CEACAM19, SUMF1, TWSG1, COL7A1, MANSC1
UP_KEYWORDS	Glycoprotein	46	0.000202092	STEAP3, ECM2, ST6GALNAC2, C1S, C1R, CPXM2, MRGPRF, TNFRSF11B, TREM1, FSTL1, SERPINA5, PLAU, PDPN, C1RL, ENPP1, SLIT2, GPR55, INSRR, CYBRD1, CP, HLA-G, MFAP4, SFRP4, ANGPTL7, CD109, SERPING1, COL21A1, HLA-DRA, DSG2, PLP2, PLA2R1, LTF	GBA, TMEM107, CD59, AGA, CTBS, GYG1, SIL1, OVGP1, BTBD17, CEACAM19, SUMF1, TWSG1, COL7A1, MANSC1
UP_SEQ_FEATURE	glycosylation site:N-linked (GlcNAc...)	44	0.000994581	STEAP3, ECM2, ST6GALNAC2, C1S, C1R, CPXM2, MRGPRF, TNFRSF11B, TREM1, FSTL1, SERPINA5, PLAU, C1RL, ENPP1, SLIT2, GPR55, INSRR, CYBRD1, CP, HLA-G, MFAP4, SFRP4, ANGPTL7, CD109, SERPING1, COL21A1, HLA-DRA, DSG2, PLP2, PLA2R1, LTF	GBA, TMEM107, CD59, AGA, CTBS, SIL1, OVGP1, BTBD17, CEACAM19, SUMF1, TWSG1, COL7A1, MANSC1
GOTERM_CC_DIRECT	GO:0005576~extracellular region	23	0.0034185	ANXA1, C1S, C1R, RARRES2, TNFRSF11B, RNASE4, TREM1, CP, FSTL1, SERPINA5, MFAP4, SFRP4, ANGPTL7, PLAU, SERPING1, COL21A1, ANG, SLIT2, PLA2R1, LTF	OVGP1, BTBD17, COL7A1
KEGG_PATHWAY	hsa04610:Complement and coagulation cascades	6	0.00824814	C1S, PLAU, C1R, SERPING1, SERPINA5	CD59
GOTERM_CC_DIRECT	GO:0009986~cell surface	12	0.00917351	SFRP4, ANXA1, ANXA2, PLAU, CD109, HLA-DRA, ENPP1, DSG2, SLIT2, PLA2R1, LTF	CD59
UP_KEYWORDS	Oxidoreductase	12	0.0115489	ALDH3A1, ALDH1A3, STEAP3, CYBRD1, GMPR, SQRDL, SOD2, PRDX6, CP	KDM4B, BCKDHB, SUMF1
UP_KEYWORDS	Copper	5	0.0150939	STEAP3, MT1M, MT1G, CP, MT1E
UP_KEYWORDS	Complement pathway	4	0.0189646	C1S, C1R, C1RL, SERPING1
UP_KEYWORDS	Cadmium	3	0.0277015	MT1M, MT1G, MT1E
GOTERM_CC_DIRECT	GO:0042383~sarcolemma	5	0.0454219	ANXA1, KCNJ8, ANXA2, FLNC	CD59
UP_KEYWORDS	Annexin	3	0.0461808	ANXA1, ANXA2, ANXA2P2
UP_KEYWORDS	Polymorphism	78	0.0461808	STEAP3, ECM2, C2ORF40, SH2D4A, CPXM2, MT1M, MRGPRF, PYGL, SQRDL, TREM1, CASC1, SERPINA5, PLAU, C1RL, ENPP1, WDR38, ANXA2, INSRR, PAX3, RNASE4, SYTL3, SFRP4, ALDH3A1, ALDH1A3, ANGPTL7, CD109, S100A6, COL21A1, SERPING1, ANG, DSG2, PLA2R1, LTF, SLC47A2, C1S, C1R, GMPR, ARHGAP18, C7ORF57, TNFRSF11B, TCTEX1D1, PDPN, SLIT2, FLNC, FILIP1L, TTC12, DNAH11, KCNJ8, GPR55, CYBRD1, DDIT4L, SOD2, CP, MFAP4, HL…	SETD5, PIGP, CTBS, SIL1, OVGP1, RALBP1, BCKDHB, SUMF1, FNDC8, NCOR2, BBS12, TAX1BP3, HDAC4, GBA, DOT1L, CECR2, CTNNA1, AGA, KDM4B, COL7A1, MANSC1
UP_KEYWORDS	Disulfide bond	31	0.0461808	ST6GALNAC2, C1S, C1R, CPXM2, TNFRSF11B, TREM1, FSTL1, PLAU, C1RL, ENPP1, SLIT2, ANXA1, RARRES2, INSRR, RNASE4, CP, PRDX6, HLA-G, SFRP4, ANGPTL7, CD109, SERPING1, HLA-DRA, ANG, PLA2R1, LTF	GBA, CD59, AGA, SUMF1, COL7A1
UP_KEYWORDS	Metal-thiolate cluster	3	0.0461808	MT1M, MT1G, MT1E
UP_KEYWORDS	Calcium/phospholipid-binding	3	0.0461808	ANXA1, ANXA2, ANXA2P2
UP_KEYWORDS	Immunity	9	0.0726894	ANXA1, C1S, C1R, C1RL, HLA-DRA, SERPING1, LAX1, HLA-G, LTF
GOTERM_MF_DIRECT	GO:0005509~calcium ion binding	13	0.0894926	ANXA1, C1S, ANXA2, C1R, FSTL1, SYTL3, S100A6, ENPP1, DSG2, SLIT2, ANXA2P2, CAPS, S100A10
INTERPRO	IPR018252:Annexin repeat, conserved site	3	0.0904579	ANXA1, ANXA2, ANXA2P2
INTERPRO	IPR003019:Metallothionein superfamily, eukaryotic	3	0.0904579	MT1M, MT1G, MT1E
INTERPRO	IPR018502:Annexin repeat	3	0.0904579	ANXA1, ANXA2, ANXA2P2
INTERPRO	IPR001464:Annexin	3	0.0904579	ANXA1, ANXA2, ANXA2P2
INTERPRO	IPR023587:Metallothionein domain, vertebrate	3	0.0904579	MT1M, MT1G, MT1E
INTERPRO	IPR018064:Metallothionein, vertebrate, metal binding site	3	0.0904579	MT1M, MT1G, MT1E
INTERPRO	IPR000006:Metallothionein, vertebrate	3	0.0904579	MT1M, MT1G, MT1E
INTERPRO	IPR017854:Metallothionein domain	3	0.0904579	MT1M, MT1G, MT1E
UP_KEYWORDS	Serine protease	5	0.0929829	C1S, PLAU, C1R, C1RL, LTF
GOTERM_MF_DIRECT	GO:0008201~heparin binding	6	0.119478	ECM2, ANG, SLIT2, FSTL1, SERPINA5, LTF
GOTERM_MF_DIRECT	GO:0004859~phospholipase inhibitor activity	3	0.119478	ANXA1, ANXA2, ANXA2P2
UP_KEYWORDS	Extracellular matrix	6	0.136213	MFAP4, ECM2, ANXA2, COL21A1, ANXA2P2	COL7A1
UP_KEYWORDS	Heparin-binding	4	0.136213	SLIT2, FSTL1, SERPINA5, LTF
UP_KEYWORDS	Serine protease inhibitor	4	0.136213	CD109, SERPING1, SERPINA5	COL7A1
KEGG_PATHWAY	hsa04978:Mineral absorption	4	0.13829	MT1M, CYBRD1, MT1G, MT1E
UP_SEQ_FEATURE	metal ion-binding site:Divalent metal cation; cluster B	3	0.164852	MT1M, MT1G, MT1E
UP_SEQ_FEATURE	region of interest:Alpha	3	0.164852	MT1M, MT1G, MT1E
UP_SEQ_FEATURE	region of interest:Beta	3	0.164852	MT1M, MT1G, MT1E
UP_SEQ_FEATURE	metal ion-binding site:Divalent metal cation; cluster A	3	0.164852	MT1M, MT1G, MT1E
UP_SEQ_FEATURE	disulfide bond	28	0.164852	ST6GALNAC2, C1S, C1R, CPXM2, TNFRSF11B, TREM1, FSTL1, PLAU, C1RL, ENPP1, SLIT2, INSRR, RNASE4, CP, PRDX6, HLA-G, SFRP4, ANGPTL7, SERPING1, HLA-DRA, ANG, PLA2R1, LTF	GBA, CD59, AGA, SUMF1, COL7A1
UP_KEYWORDS	Calcium	11	0.182529	MFAP4, ANXA1, C1S, ANXA2, C1R, S100A6, ENPP1, DSG2, ANXA2P2, CAPS	SUMF1
GOTERM_MF_DIRECT	GO:0005544~calcium-dependent phospholipid binding	4	0.198498	ANXA1, ANXA2, ANXA2P2, SYTL3
UP_KEYWORDS	Basement membrane	3	0.199143	ANXA2, ANXA2P2	COL7A1
SMART	SM00335:ANX	3	0.220699	ANXA1, ANXA2, ANXA2P2
UP_KEYWORDS	Protease	8	0.241871	C1S, PLAU, C1R, C1RL, SERPINA5, LTF	AGA, SEC11C
UP_KEYWORDS	Pharmaceutical	3	0.243917	ANXA1, PLAU	GBA
GOTERM_CC_DIRECT	GO:0019897~extrinsic component of plasma membrane	3	0.249097	ANXA2, SYTL3, S100A10
UP_KEYWORDS	Protease inhibitor	4	0.25215	CD109, SERPING1, SERPINA5	COL7A1
INTERPRO	IPR002389:Annexin, type II	2	0.341326	ANXA2, ANXA2P2
UP_KEYWORDS	Fibrinolysis	2	0.36587	PLAU, SERPING1
UP_KEYWORDS	Innate immunity	5	0.399719	ANXA1, C1S, C1R, C1RL, SERPING1
UP_KEYWORDS	Lysosome	5	0.399719	HLA-DRA, PRDX6	GBA, AGA, CTBS
UP_KEYWORDS	Hydrolase	15	0.403478	C1S, C1R, RNASE4, PRDX6, SERPINA5, PLAU, C1RL, ENPP1, ANG, LTF	HDAC4, GBA, AGA, CTBS, SEC11C
INTERPRO	IPR013781:Glycoside hydrolase, catalytic domain	3	0.488334		OVGP1, GBA, CTBS
UP_KEYWORDS	Disease mutation	20	0.50788	DNAH11, KCNJ8, PAX3, TNFRSF11B, PYGL, ALDH1A3, SERPING1, ENPP1, DSG2, ANG, FLNC	GBA, BCKDHB, SUMF1, BBS12, COL7A1, CD59, AGA, GYG1, SIL1
INTERPRO	IPR024175:Peptidase S1A, complement C1r/C1S/mannan-binding	2	0.555531	C1S, C1R
INTERPRO	IPR001314:Peptidase S1A, chymotrypsin-type	4	0.561361	C1S, PLAU, C1R, C1RL
GOTERM_MF_DIRECT	GO:0042803~protein homodimerization activity	10	0.567981	ALDH1A3, ANXA1, S100A6, ENPP1, ANG, SLIT2, PYGL, HLA-G, S100A10	SUMF1
GOTERM_MF_DIRECT	GO:0004867~serine-type endopeptidase inhibitor activity	4	0.567981	CD109, SERPING1, SERPINA5	COL7A1
INTERPRO	IPR017853:Glycoside hydrolase, superfamily	3	0.57431		OVGP1, GBA, CTBS
INTERPRO	IPR000859:CUB domain	3	0.57431	C1S, C1R, C1RL
INTERPRO	IPR001254:Peptidase S1	4	0.57431	C1S, PLAU, C1R, C1RL
INTERPRO	IPR001223:Glycoside hydrolase, family 18, catalytic domain	2	0.57431		OVGP1, CTBS
INTERPRO	IPR011583:Chitinase II	2	0.57431		OVGP1, CTBS
INTERPRO	IPR000436:Sushi/SCR/CCP	3	0.57431	C1S, C1R, C1RL
INTERPRO	IPR009003:Trypsin-like cysteine/serine peptidase domain	4	0.57431	C1S, PLAU, C1R, C1RL
GOTERM_CC_DIRECT	GO:0031012~extracellular matrix	6	0.622591	MFAP4, ANXA2, CPXM2, RARRES2, COL21A1	COL7A1
PIR_SUPERFAMILY	PIRSF001155:C1r-like complement-activating serine protease	2	0.634517	C1S, C1R
UP_KEYWORDS	Hydroxylation	3	0.644513	C1S, C1R	COL7A1
INTERPRO	IPR023411:Ribonuclease A, active site	2	0.645998	RNASE4, ANG
INTERPRO	IPR003645:Follistatin-like, N-terminal	2	0.645998	SLIT2, FSTL1
GOTERM_MF_DIRECT	GO:0019834~phospholipase A2 inhibitor activity	2	0.655888	ANXA1, ANXA2
GOTERM_CC_DIRECT	GO:0031982~vesicle	4	0.660614	ANXA1, ANXA2, CAPS	CD59
GOTERM_CC_DIRECT	GO:0005886~plasma membrane	32	0.660614	SLC47A2, MRGPRF, TNFRSF11B, PYGL, TREM1, PLAU, PDPN, ENPP1, SLIT2, FLNC, ANXA1, ANXA2, KCNJ8, GPR55, CYBRD1, LAX1, HLA-G, SYTL3, ALDH3A1, CD109, HLA-DRA, DSG2, PLP2, PLA2R1, CAPS	TBC1D3B, CTNNA1, CD59, PSENEN, BTBD17, TAX1BP3, RHOQ
GOTERM_CC_DIRECT	GO:0012507~ER to Golgi transport vesicle membrane	3	0.660614	HLA-DRA, HLA-G	CD59
GOTERM_MF_DIRECT	GO:0008092~cytoskeletal protein binding	3	0.733848	ANXA2, ANXA2P2, FLNC
GOTERM_MF_DIRECT	GO:0004568~chitinase activity	2	0.755881		OVGP1, CTBS
GOTERM_MF_DIRECT	GO:0004030~aldehyde dehydrogenase [NAD(P)+] activity	2	0.755881	ALDH3A1, ALDH1A3
GOTERM_MF_DIRECT	GO:0048306~calcium-dependent protein binding	3	0.755881	ANXA1, ANXA2, S100A6
SMART	SM00636:Glyco_18	2	0.756788		OVGP1, CTBS
SMART	SM00042:CUB	3	0.756788	C1S, C1R, C1RL
SMART	SM00020:Tryp_SPc	4	0.756788	C1S, PLAU, C1R, C1RL
GOTERM_MF_DIRECT	GO:0008061~chitin binding	2	0.757196		OVGP1, CTBS
SMART	SM00274:FOLN	2	0.773954	SLIT2, FSTL1
GOTERM_MF_DIRECT	GO:0004252~serine-type endopeptidase activity	5	0.792107	C1S, PLAU, C1R, C1RL, LTF
UP_SEQ_FEATURE	region of interest:Connecting peptide	3	0.830252	PLAU, HLA-DRA, HLA-G
GOTERM_CC_DIRECT	GO:0072562~blood microparticle	4	0.849185	C1S, C1R, SERPING1, CP
SMART	SM00092:RNAse_Pc	2	0.921002	RNASE4, ANG
GOTERM_MF_DIRECT	GO:0098641~cadherin binding involved in cell-cell adhesion	5	0.94115	ANXA1, ANXA2, ARHGAP18, PRDX6	CTNNA1
GOTERM_MF_DIRECT	GO:0044548~S100 protein binding	2	0.94115	ANXA2, S100A6
GOTERM_MF_DIRECT	GO:0015075~ion transmembrane transporter activity	2	0.94115	S100A6, PLP2
GOTERM_CC_DIRECT	GO:0005765~lysosomal membrane	5	0.974632	ANXA2, HLA-DRA, ENPP1, CP	GBA
GOTERM_CC_DIRECT	GO:0005604~basement membrane	3	0.974632	ANXA2, ANXA2P2	COL7A1
INTERPRO	IPR001427:Ribonuclease A	2	0.995896	RNASE4, ANG
INTERPRO	IPR016160:Aldehyde dehydrogenase, conserved site	2	0.995896	ALDH3A1, ALDH1A3
INTERPRO	IPR023412:Ribonuclease A-domain	2	0.995896	RNASE4, ANG
INTERPRO	IPR015590:Aldehyde dehydrogenase domain	2	0.995896	ALDH3A1, ALDH1A3
INTERPRO	IPR016161:Aldehyde/histidinol dehydrogenase	2	0.995896	ALDH3A1, ALDH1A3
INTERPRO	IPR016163:Aldehyde dehydrogenase, C-terminal	2	0.995896	ALDH3A1, ALDH1A3
INTERPRO	IPR016162:Aldehyde dehydrogenase, N-terminal	2	0.995896	ALDH3A1, ALDH1A3
UP_SEQ_FEATURE	domain:Peptidase S1	4	1	C1S, PLAU, C1R, C1RL
GOTERM_BP_DIRECT	GO:0042493~response to drug	6	1	ALDH3A1, NNMT, ANXA1, TNFRSF11B, SOD2	HDAC4
UP_SEQ_FEATURE	region of interest:Alpha-2	2	1	HLA-DRA, HLA-G
UP_SEQ_FEATURE	region of interest:Alpha-1	2	1	HLA-DRA, HLA-G
KEGG_PATHWAY	hsa04145:Phagosome	4	1	C1R, HLA-DRA, PLA2R1, HLA-G
GOTERM_BP_DIRECT	GO:0045087~innate immune response	7	1	ANXA1, C1S, C1R, C1RL, SERPING1, ANG, TREM1
UP_SEQ_FEATURE	short sequence motif:Cell attachment site	3	1	MFAP4, ECM2	COL7A1
UP_SEQ_FEATURE	active site:Nucleophile	4	1	ALDH1A3, LTF	GBA, AGA
GOTERM_MF_DIRECT	GO:0004029~aldehyde dehydrogenase (NAD) activity	2	1	ALDH3A1, ALDH1A3
GOTERM_BP_DIRECT	GO:0007507~heart development	4	1	DNAH11, KCNJ8, FOXJ1, SOD2
GOTERM_BP_DIRECT	GO:0055114~oxidation-reduction process	11	1	ALDH3A1, ALDH1A3, STEAP3, CYBRD1, GMPR, SOD2, PRDX6, CP	KDM4B, BCKDHB, SUMF1
GOTERM_BP_DIRECT	GO:0010951~negative regulation of endopeptidase activity	4	1	CD109, SERPING1, SERPINA5	COL7A1
GOTERM_CC_DIRECT	GO:0001726~ruffle	3	1	ANXA2, PDPN, S100A6
UP_SEQ_FEATURE	active site:Proton donor	4	1	RNASE4, ANG	GBA, CTBS
GOTERM_CC_DIRECT	GO:0005788~endoplasmic reticulum lumen	4	1	COL21A1	COL7A1, SIL1, SUMF1
UP_SEQ_FEATURE	domain:VWFC	2	1	ECM2, FSTL1
GOTERM_MF_DIRECT	GO:0016491~oxidoreductase activity	4	1	ALDH3A1, ALDH1A3, SQRDL	SUMF1
KEGG_PATHWAY	hsa05133:Pertussis	3	1	C1S, C1R, SERPING1
UP_SEQ_FEATURE	active site:Charge relay system	4	1	C1S, PLAU, C1R, C1RL
GOTERM_BP_DIRECT	GO:0044849~estrous cycle	2	1	ANXA1	NCOR2
GOTERM_BP_DIRECT	GO:0071276~cellular response to cadmium ion	2	1	MT1G, MT1E
GOTERM_MF_DIRECT	GO:0016620~oxidoreductase activity, acting on the aldehyde or oxo group of donors, NAD or NADP as acceptor	2	1	ALDH3A1, ALDH1A3
GOTERM_BP_DIRECT	GO:0001765~membrane raft assembly	2	1	ANXA2, S100A10
GOTERM_BP_DIRECT	GO:0097066~response to thyroid hormone	2	1	ANXA2	GBA
GOTERM_BP_DIRECT	GO:0010243~response to organonitrogen compound	2	1	NNMT	NCOR2
GOTERM_BP_DIRECT	GO:0008360~regulation of cell shape	4	1	ANXA1, PDPN, ARHGAP18	RHOQ
UP_SEQ_FEATURE	repeat:Annexin 3	2	1	ANXA1, ANXA2
UP_SEQ_FEATURE	repeat:Annexin 1	2	1	ANXA1, ANXA2
GOTERM_BP_DIRECT	GO:0006959~humoral immune response	3	1	FOXJ1, TREM1, LTF
GOTERM_BP_DIRECT	GO:0006958~complement activation, classical pathway	4	1	C1S, C1R, C1RL, SERPING1
UP_SEQ_FEATURE	domain:EGF-like; calcium-binding	2	1	C1S, C1R
GOTERM_BP_DIRECT	GO:0042730~fibrinolysis	3	1	ANXA2, PLAU, SERPING1
GOTERM_BP_DIRECT	GO:0045926~negative regulation of growth	3	1	MT1M, MT1G, MT1E
GOTERM_BP_DIRECT	GO:1900138~negative regulation of phospholipase A2 activity	2	1	ANXA1, PLA2R1
KEGG_PATHWAY	hsa05150:Staphylococcus aureus infection	3	1	C1S, C1R, HLA-DRA
GOTERM_BP_DIRECT	GO:0006032~chitin catabolic process	2	1		OVGP1, CTBS
GOTERM_BP_DIRECT	GO:0043627~response to estrogen	3	1	TNFRSF11B	GBA, CTNNA1
GOTERM_BP_DIRECT	GO:0019732~antifungal humoral response	2	1	ANG, LTF
GOTERM_BP_DIRECT	GO:0006900~membrane budding	2	1	ANXA2, S100A10
GOTERM_BP_DIRECT	GO:0051099~positive regulation of binding	2	1	ANXA2, S100A10
GOTERM_BP_DIRECT	GO:0006935~chemotaxis	4	1	PLAU, RARRES2, PLP2	RALBP1
GOTERM_BP_DIRECT	GO:0071294~cellular response to zinc ion	3	1	MT1M, MT1G, MT1E
GOTERM_BP_DIRECT	GO:0006508~proteolysis	7	1	C1S, PLAU, CPXM2, C1R, C1RL, LTF	AGA
GOTERM_BP_DIRECT	GO:0031340~positive regulation of vesicle fusion	2	1	ANXA1, ANXA2
UP_SEQ_FEATURE	mutagenesis site	18	1	ANXA2, TNFRSF11B, SOD2, PRDX6, HLA-G, PLAU, PDPN, C1RL, ANG, FLNC, LTF	PSENEN, HDAC4, GBA, DOT1L, SUMF1, CD59, RHOQ
UP_SEQ_FEATURE	site:Reactive bond	3	1	SERPING1, SERPINA5	COL7A1
UP_SEQ_FEATURE	sequence variant	76	1	STEAP3, ECM2, C2ORF40, SH2D4A, CPXM2, MT1M, MRGPRF, PYGL, SQRDL, TREM1, CASC1, SERPINA5, PLAU, C1RL, ENPP1, WDR38, ANXA2, INSRR, PAX3, RNASE4, SYTL3, SFRP4, ALDH3A1, ALDH1A3, ANGPTL7, CD109, S100A6, COL21A1, SERPING1, ANG, DSG2, PLA2R1, LTF, SLC47A2, C1S, C1R, GMPR, ARHGAP18, C7ORF57, TNFRSF11B, TCTEX1D1, PDPN, SLIT2, FLNC, FILIP1L, TTC12, DNAH11, KCNJ8, GPR55, CYBRD1, DDIT4L, SOD2, CP, HLA-DRA, …	SETD5, PIGP, CTBS, SIL1, OVGP1, RALBP1, BCKDHB, SUMF1, FNDC8, NCOR2, BBS12, HDAC4, GBA, DOT1L, CECR2, CTNNA1, AGA, KDM4B, COL7A1, MANSC1
GOTERM_BP_DIRECT	GO:0045599~negative regulation of fat cell differentiation	3	1	ENPP1, SOD2	BBS12
GOTERM_BP_DIRECT	GO:0090630~activation of GTPase activity	3	1	FOXJ1	TBC1D3B, TAX1BP3
GOTERM_BP_DIRECT	GO:0001666~response to hypoxia	4	1	ALDH3A1, PLAU, ANG, SOD2
UP_SEQ_FEATURE	repeat:Annexin 4	2	1	ANXA1, ANXA2
UP_SEQ_FEATURE	repeat:Annexin 2	2	1	ANXA1, ANXA2
GOTERM_BP_DIRECT	GO:0009268~response to pH	2	1	KCNJ8	GBA
