# Supplementary material for: Transmembrane Protein TMEM230, a Target of Glioblastoma Therapy
Source: Front Cell Neurosci. 2021 Nov 17;15:703431. doi: 10.3389/fncel.2021.703431 (PMC8636015; doi:10.3389/fncel.2021.703431)
Supplement: Supplementary Table 10 — All enriched pathways identified different between high or low TMEM230 expression in high grade (G3) astrocytoma of patients from DEG. [file Table_10.XLSX]

## Sheet: interesction_all
Modualted Pathways in Common with all LGG with TMEM230 high and Low with Benjamini P < or = .05
TERM	DOWNREGULATED GENES	UPREGULATED GENES	GENE NUMBER
GOTERM_BP_DIRECT|||GO:0060333~interferon-gamma-mediated signaling pathway		CIITA, GBP1, HLA-DPA1, HLA-DPB1, HLA-DQA1, HLA-DQA2, HLA-DRA, HLA-DRB1, IFI30	10
GOTERM_CC_DIRECT|||GO:0009897~external side of plasma membrane		CD3E, CD74, CXCL10, CXCL9, FCGR3A, HLA-DRB1, IL2RB, ITGA2, PDPN, SERPINA5, TRPM8	11
GOTERM_MF_DIRECT|||GO:0008201~heparin binding		ANG, COL5A1, CXCL10, CXCL11, FGFRL1, FSTL1, LTF, PLA2G5, POSTN, SERPINA5, WISP1	11
KEGG_PATHWAY|||hsa05330:Allograft rejection		HLA-DMA, HLA-DMB, HLA-DOA, HLA-DPA1, HLA-DPB1, HLA-DQA1, HLA-DQA2, HLA-DRA, HLA-DRB1	10
UP_KEYWORDS|||Calcium	KCNIP2	ANXA1, ANXA2, ANXA2P2, COL5A1, FKBP9, GSN, ITGA2, ITGAL, MMP9, MRC2, MYL12A, PLA2G5, PLS3, S100A11, S100A4, S100A6	17
SMART|||SM00920:SM00920		HLA-DMA, HLA-DOA, HLA-DPA1, HLA-DQA1, HLA-DQA2, HLA-DRA	7
GOTERM_BP_DIRECT|||GO:0042102~positive regulation of T cell proliferation		ANXA1, CD3E, HLA-DMB, HLA-DPA1, HLA-DPB1, JAK3, PDCD1LG2	8
GOTERM_BP_DIRECT|||GO:0006954~inflammatory response		ANXA1, CASP4, CHI3L1, CIITA, CXCL10, CXCL11, CXCL9, HDAC4, ITGAL, PTGS1, RARRES2, S1PR3, TLR8, TNFAIP6, TNFRSF11B	15
UP_KEYWORDS|||Cell adhesion		ADAM12, DPP4, EMILIN2, ITGA2, ITGAL, POSTN, SRPX2, TNFAIP6, TNFRSF12A, TRIP6, WISP1	11
UP_KEYWORDS|||Polymorphism	KCNJ11	ABCC3, ADAM12, AIM1, ALDH1A3, AMPD3, ANG, ANXA2, APOBEC3F, APOBEC3G, APOL1, B3GNT7, BANK1, BCAT1, BCO2, C10ORF11, C11ORF63, C1RL, CA2, CA3, CAPG, CARD16, CASP4, CASP8, CCDC152, CD109, CD58, CD7, CHI3L1, CHST6, CIITA, CMYA5, COL21A1, COL5A1, CPPED1, CRYZ, CTSW, CTSZ, CXCL11, CYP27A1, DDIT4L, DNAH11, DPY19L1, DPYD, EMILIN2, EMILIN3, EMP3, EVC2, EYA4, FAM114A1, FAM180B, FCGBP, FCGR2A, FCGR3A, FGFBP2…	159
UP_SEQ_FEATURE|||region of interest:Connecting peptide		HLA-DMA, HLA-DMB, HLA-DOA, HLA-DPA1, HLA-DPB1, HLA-DQA1, HLA-DQA2, HLA-DRA, HLA-DRB1, PLAU	11
UP_KEYWORDS|||Membrane	KCNIP2, KCNJ11	ABCC3, ADAM12, ANXA1, APOL1, B3GNT7, C10ORF105, CA2, CASP4, CD109, CD3E, CD58, CD7, CD74, CHST6, CLIC1, CYP27A1, DIRAS3, DPP4, DPY19L1, EMP3, EVC2, FAM180B, FCGR2A, FCGR2C, FCGR3A, FGFRL1, FLNC, GALNT3, GAPT, GBP1, GNG5, GPR1, GPR37, GPR65, GPX8, HLA-DMA, HLA-DMB, HLA-DOA, HLA-DPA1, HLA-DPB1, HLA-DQA1, HLA-DQA2, HLA-DRA, HLA-DRB1, HMOX1, IL2RB, IQGAP1, ITGA2, ITGAL, JAK3, KCNK5, LGR6, LPAR1, LSP1…	91
UP_KEYWORDS|||Transmembrane	KCNJ11	ABCC3, ADAM12, APOL1, B3GNT7, C10ORF105, CD3E, CD58, CD7, CD74, CHST6, CLIC1, DPP4, DPY19L1, EMP3, EVC2, FAM180B, FCGR2A, FCGR2C, FCGR3A, FGFRL1, GALNT3, GAPT, GPR1, GPR37, GPR65, GPX8, HLA-DMA, HLA-DMB, HLA-DOA, HLA-DPA1, HLA-DPB1, HLA-DQA1, HLA-DQA2, HLA-DRA, HLA-DRB1, HMOX1, IL2RB, ITGA2, ITGAL, KCNK5, LGR6, LPAR1, MAOB, MOXD1, MRC2, OSCAR, PDCD1LG2, PDE6B, PDPN, PLLP, PLP2, PMP22, S1PR3, SDC4…	68
GOTERM_CC_DIRECT|||GO:0030666~endocytic vesicle membrane		CD74, HLA-DPA1, HLA-DPB1, HLA-DQA1, HLA-DQA2, HLA-DRA, HLA-DRB1	7
KEGG_PATHWAY|||hsa05145:Toxoplasmosis		CASP8, CIITA, HLA-DMA, HLA-DMB, HLA-DOA, HLA-DPA1, HLA-DPB1, HLA-DQA1, HLA-DQA2, HLA-DRA, HLA-DRB1, SOCS1, TGFB2	14
GOTERM_CC_DIRECT|||GO:0005576~extracellular region		ADAM12, ANG, ANXA1, APOL1, CASP4, CLCF1, COL21A1, COL5A1, CTSW, CXCL10, CXCL11, CXCL9, EMILIN2, FSTL1, GBP1, GDF15, GSN, GZMA, GZMK, HAMP, HEBP1, IFI30, IGFBP2, LTF, LUM, MMP9, OSCAR, PDGFA, PLA2G5, PLAT, PLAU, RARRES2, RNASE4, SERPINA1, SERPINA5, SFRP4, SPINT1, TGFB2, TNFRSF11B	39
GOTERM_CC_DIRECT|||GO:0009986~cell surface		ANXA1, ANXA2, CD109, CD58, CD74, CIITA, DPP4, HLA-DMA, HLA-DPA1, HLA-DPB1, HLA-DRA, HLA-DRB1, ITGA2, ITGAL, LPAR1, LTF, PDGFA, PLAT, PLAU, SDC4, SFRP4, SRPX2, TNFRSF12A	23
KEGG_PATHWAY|||hsa05322:Systemic lupus erythematosus		FCGR2A, FCGR3A, HLA-DMA, HLA-DMB, HLA-DOA, HLA-DPA1, HLA-DPB1, HLA-DQA1, HLA-DQA2, HLA-DRA, HLA-DRB1	11
KEGG_PATHWAY|||hsa05320:Autoimmune thyroid disease		HLA-DMA, HLA-DMB, HLA-DOA, HLA-DPA1, HLA-DPB1, HLA-DQA1, HLA-DQA2, HLA-DRA, HLA-DRB1	10
UP_SEQ_FEATURE|||glycosylation site:N-linked (GlcNAc...)		ABCC3, ADAM12, APOL1, B3GNT7, C1RL, CD109, CD58, CD7, CD74, CHI3L1, CHST6, CLCF1, COL21A1, CTSW, CTSZ, DPP4, EMILIN2, EMILIN3, EMP3, EVC2, FCGBP, FCGR2A, FCGR2C, FCGR3A, FGFRL1, FKBP9, FSTL1, GALNT3, GDF15, GPR1, GPR37, GPR65, GZMA, HLA-DMA, HLA-DMB, HLA-DOA, HLA-DPA1, HLA-DPB1, HLA-DQA1, HLA-DQA2, HLA-DRA, HLA-DRB1, IFI30, IL2RB, ITGA2, ITGAL, KCNK5, LGR6, LPAR1, LTF, MMP9, MOXD1, MRC2, NPC2, OS…	76
GOTERM_MF_DIRECT|||GO:0005102~receptor binding		ANG, ANXA1, CD58, CLCF1, CXCL10, DPP4, HAMP, IGFBP2, JAK3, MSN, PIPOX, PLAT, RARRES2, SRPX2, TGFB2	15
KEGG_PATHWAY|||hsa05140:Leishmaniasis		FCGR2A, FCGR2C, FCGR3A, HLA-DMA, HLA-DMB, HLA-DOA, HLA-DPA1, HLA-DPB1, HLA-DQA1, HLA-DQA2, HLA-DRA, HLA-DRB1, TGFB2	14
GOTERM_CC_DIRECT|||GO:0042613~MHC class II protein complex		CD74, HLA-DMA, HLA-DMB, HLA-DOA, HLA-DPA1, HLA-DPB1, HLA-DQA1, HLA-DQA2, HLA-DRA, HLA-DRB1	11
INTERPRO|||IPR001003:MHC class II, alpha chain, N-terminal		HLA-DMA, HLA-DOA, HLA-DPA1, HLA-DQA1, HLA-DQA2, HLA-DRA	7
INTERPRO|||IPR014745:MHC class II, alpha/beta chain, N-terminal		HLA-DMA, HLA-DMB, HLA-DOA, HLA-DPA1, HLA-DPB1, HLA-DQA1, HLA-DQA2, HLA-DRA, HLA-DRB1	10
UP_KEYWORDS|||MHC II		HLA-DMA, HLA-DMB, HLA-DOA, HLA-DPA1, HLA-DPB1, HLA-DQA1, HLA-DQA2, HLA-DRA, HLA-DRB1	10
UP_KEYWORDS|||Disulfide bond		ADAM12, ANG, ANXA1, C1RL, CD109, CD3E, CD58, CD7, CD74, CHI3L1, CLIC1, COL5A1, CTSW, CTSZ, CXCL10, CXCL11, CXCL9, DPP4, EMILIN2, EMILIN3, FABP5, FCGBP, FCGR2A, FCGR2C, FCGR3A, FGFBP2, FGFRL1, FSTL1, GALNT3, GDF15, GNLY, GPR1, GPR37, GPR65, GSN, GZMA, GZMK, HAMP, HLA-DMA, HLA-DMB, HLA-DOA, HLA-DPA1, HLA-DPB1, HLA-DQA1, HLA-DQA2, HLA-DRA, HLA-DRB1, IFI30, IGFBP2, IL2RB, ITGA2, ITGAL, KCNK5, LGR6, L…	82
KEGG_PATHWAY|||hsa05310:Asthma		HLA-DMA, HLA-DMB, HLA-DOA, HLA-DPA1, HLA-DPB1, HLA-DQA1, HLA-DQA2, HLA-DRA, HLA-DRB1	10
GOTERM_CC_DIRECT|||GO:0071556~integral component of lumenal side of endoplasmic reticulum membrane		CD74, HLA-DPA1, HLA-DPB1, HLA-DQA1, HLA-DQA2, HLA-DRA, HLA-DRB1	8
KEGG_PATHWAY|||hsa05164:Influenza A		CIITA, CXCL10, HLA-DMA, HLA-DMB, HLA-DOA, HLA-DPA1, HLA-DPB1, HLA-DQA1, HLA-DQA2, HLA-DRA, HLA-DRB1	12
UP_KEYWORDS|||Secreted		ADAM12, ANG, ANXA1, ANXA2, ANXA2P2, APOL1, C1RL, CAPG, CASP4, CHI3L1, CLCF1, COL21A1, COL5A1, CXCL10, CXCL11, CXCL9, DPP4, EMILIN2, EMILIN3, FCGBP, FCGR3A, FGFBP2, FSTL1, GBP1, GDF15, GNLY, GSN, GZMA, GZMK, HAMP, IFI30, IGFBP2, LTF, LUM, MMP9, NPC2, OSCAR, PDCD1LG2, PDGFA, PLA2G5, PLAT, PLAU, POSTN, RARRES2, RNASE4, SDC4, SERPINA1, SERPINA5, SFRP4, SPINT1, SRPX2, TGFB2, TNFRSF11B, VWA1, WISP1	55
UP_KEYWORDS|||Lysosome		CD74, CTSZ, HLA-DMA, HLA-DMB, HLA-DOA, HLA-DPA1, HLA-DPB1, HLA-DQA1, HLA-DQA2, HLA-DRA, HLA-DRB1, IFI30, NPC2, TMBIM1	14
UP_SEQ_FEATURE|||topological domain:Cytoplasmic	KCNJ11	ABCC3, ADAM12, B3GNT7, CD3E, CD58, CD7, CD74, CHST6, DPP4, FCGR2A, FCGR2C, FCGR3A, FGFRL1, GALNT3, GPR1, GPR37, GPR65, HLA-DMA, HLA-DMB, HLA-DOA, HLA-DPA1, HLA-DPB1, HLA-DQA1, HLA-DQA2, HLA-DRA, HLA-DRB1, IL2RB, ITGA2, ITGAL, KCNK5, LGR6, LPAR1, MAOB, MRC2, OSCAR, PDCD1LG2, PDPN, PLLP, S1PR3, SDC4, SLC2A10, STEAP3, TLR8, TMEM154, TNFRSF12A, TRAF3IP3, TRPM8	48
GOTERM_CC_DIRECT|||GO:0005615~extracellular space		ANG, ANXA1, ANXA2, APOL1, C1RL, CA2, CD109, CHI3L1, CLIC1, CTSW, CTSZ, CXCL10, CXCL11, CXCL9, FGFBP2, FSTL1, GDF15, GNLY, GSN, HAMP, HMOX1, IGFBP2, LTF, LUM, MMP9, MSN, PDGFA, PLAT, PLAU, POSTN, S100A11, S100A4, SERPINA1, SERPINA5, SFRP4, SPINT1, SRPX2, TGFB2, TNFAIP6, TNFRSF11B, VWA1, WISP1	42
KEGG_PATHWAY|||hsa05321:Inflammatory bowel disease (IBD)		HLA-DMA, HLA-DMB, HLA-DOA, HLA-DPA1, HLA-DPB1, HLA-DQA1, HLA-DQA2, HLA-DRA, HLA-DRB1, TGFB2	11
UP_SEQ_FEATURE|||signal peptide		ADAM12, ANG, APOL1, C1RL, CD109, CD3E, CD58, CD7, CHI3L1, CLCF1, COL21A1, COL5A1, CTSW, CTSZ, CXCL10, CXCL11, CXCL9, EMILIN2, EMILIN3, FCGBP, FCGR2A, FCGR2C, FCGR3A, FGFBP2, FGFRL1, FKBP9, FSTL1, GDF15, GNLY, GPR37, GSN, GZMA, GZMK, HAMP, HLA-DMA, HLA-DMB, HLA-DOA, HLA-DPA1, HLA-DPB1, HLA-DQA1, HLA-DQA2, HLA-DRA, HLA-DRB1, IFI30, IGFBP2, IL2RB, ITGA2, ITGAL, LGR6, LTF, LUM, METTL7B, MMP9, MOXD1, …	82
KEGG_PATHWAY|||hsa05169:Epstein-Barr virus infection		CD58, HLA-DPA1, HLA-DPB1, HLA-DQA1, HLA-DQA2, HLA-DRA, HLA-DRB1, ITGAL, JAK3, VIM	11
KEGG_PATHWAY|||hsa05332:Graft-versus-host disease		HLA-DMA, HLA-DMB, HLA-DOA, HLA-DPA1, HLA-DPB1, HLA-DQA1, HLA-DQA2, HLA-DRA, HLA-DRB1	10
UP_SEQ_FEATURE|||topological domain:Extracellular	KCNJ11	ABCC3, ADAM12, CD3E, CD58, CD7, CD74, DPP4, FCGR2A, FCGR2C, FCGR3A, FGFRL1, GPR1, GPR37, GPR65, HLA-DOA, HLA-DPA1, HLA-DPB1, HLA-DQA1, HLA-DQA2, HLA-DRA, HLA-DRB1, IL2RB, ITGA2, ITGAL, LGR6, LPAR1, MRC2, OSCAR, PDCD1LG2, PDPN, PLLP, S1PR3, SDC4, SLC2A10, TLR8, TMEM154, TNFRSF12A, TRAF3IP3, TRPM8	40
UP_KEYWORDS|||Extracellular matrix		ANXA2, ANXA2P2, COL21A1, COL5A1, EMILIN2, EMILIN3, LUM, MMP9, POSTN, SERPINA1, VWA1	11
KEGG_PATHWAY|||hsa04940:Type I diabetes mellitus		HLA-DMA, HLA-DMB, HLA-DOA, HLA-DPA1, HLA-DPB1, HLA-DQA1, HLA-DQA2, HLA-DRA, HLA-DRB1	9
UP_KEYWORDS|||Zymogen		ADAM12, CASP4, CASP8, CTSW, CTSZ, GZMA, GZMK, MMP9, PLAT, PLAU	10
KEGG_PATHWAY|||hsa05323:Rheumatoid arthritis		HLA-DMA, HLA-DMB, HLA-DOA, HLA-DPA1, HLA-DPB1, HLA-DQA1, HLA-DQA2, HLA-DRA, HLA-DRB1, ITGAL, TGFB2	12
UP_SEQ_FEATURE|||sequence variant	KCNJ11	ABCC3, ADAM12, AIM1, ALDH1A3, AMPD3, ANG, ANXA2, APOBEC3F, APOBEC3G, APOL1, B3GNT7, BANK1, BCAT1, BCO2, C10ORF11, C11ORF63, C1RL, CA2, CA3, CAPG, CARD16, CASP4, CASP8, CCDC152, CD109, CD58, CD7, CHI3L1, CHST6, CIITA, CLCF1, CMYA5, COL21A1, COL5A1, CPPED1, CRYZ, CTSW, CTSZ, CXCL11, CYP27A1, DDIT4L, DNAH11, DPY19L1, DPYD, EMILIN2, EMILIN3, EMP3, EVC2, EYA4, FAM114A1, FAM180B, FCGBP, FCGR2A, FCGR2C,…	160
GOTERM_CC_DIRECT|||GO:0005925~focal adhesion		ANXA1, DPP4, FLNC, GSN, IQGAP1, ITGA2, MRC2, MSN, PLAU, SDC4, TRIP6, VIM	12
KEGG_PATHWAY|||hsa04145:Phagosome		FCGR2A, FCGR2C, FCGR3A, HLA-DMA, HLA-DMB, HLA-DOA, HLA-DPA1, HLA-DPB1, HLA-DQA1, HLA-DQA2, HLA-DRA, HLA-DRB1, ITGA2, MRC2, TUBA1C	15
KEGG_PATHWAY|||hsa04974:Protein digestion and absorption		COL21A1, COL5A1, DPP4, KCNK5	4
GOTERM_CC_DIRECT|||GO:0031012~extracellular matrix		ANXA2, COL21A1, COL5A1, EMILIN2, EMILIN3, LUM, PLAT, POSTN, RARRES2, TGFB2, VIM	11
GOTERM_MF_DIRECT|||GO:0032395~MHC class II receptor activity		HLA-DMA, HLA-DOA, HLA-DPA1, HLA-DPB1, HLA-DQA1, HLA-DQA2, HLA-DRA, HLA-DRB1	9
UP_SEQ_FEATURE|||domain:Ig-like C1-type		HLA-DMA, HLA-DMB, HLA-DOA, HLA-DPA1, HLA-DPB1, HLA-DQA1, HLA-DQA2, HLA-DRA, HLA-DRB1	10
GOTERM_CC_DIRECT|||GO:0005886~plasma membrane	KCNIP2, KCNJ11	ABCC3, ADAM12, ANXA1, ANXA2, CA2, CD109, CD3E, CD58, CD7, CD74, CISH, CLIC1, CPPED1, CTSZ, DIRAS3, DPP4, EMP3, FCGR2A, FCGR2C, FCGR3A, FGFRL1, FLNC, GAPT, GBP1, GNG5, GPR37, GPR65, GSN, HLA-DOA, HLA-DPA1, HLA-DPB1, HLA-DQA1, HLA-DQA2, HLA-DRA, HLA-DRB1, HMOX1, IFI30, IL2RB, IQGAP1, ITGA2, ITGAL, LGR6, LPAR1, LSP1, MSN, MYO1G, OSCAR, PDCD1LG2, PDE6B, PDPN, PLA2G5, PLAU, PLP2, PMP22, PYGL, RGS3, S1…	71
KEGG_PATHWAY|||hsa05150:Staphylococcus aureus infection		FCGR2A, FCGR2C, FCGR3A, HLA-DMA, HLA-DMB, HLA-DOA, HLA-DPA1, HLA-DPB1, HLA-DQA1, HLA-DQA2, HLA-DRA, HLA-DRB1, ITGAL	14
UP_KEYWORDS|||Innate immunity		ANXA1, APOBEC3F, APOBEC3G, C1RL, CASP4, JAK3, RNF135, SH2D1A, TLR8, ZNF683	11
GOTERM_BP_DIRECT|||GO:0001666~response to hypoxia		ANG, DPP4, HMOX1, ITGA2, PLAT, PLAU, POSTN, SOD2, TGFB2	9
KEGG_PATHWAY|||hsa04672:Intestinal immune network for IgA production		HLA-DMA, HLA-DMB, HLA-DOA, HLA-DPA1, HLA-DPB1, HLA-DQA1, HLA-DQA2, HLA-DRA, HLA-DRB1	9
KEGG_PATHWAY|||hsa05152:Tuberculosis		CASP8, CD74, CIITA, FCGR2A, FCGR2C, FCGR3A, HLA-DMA, HLA-DMB, HLA-DOA, HLA-DPA1, HLA-DPB1, HLA-DQA1, HLA-DQA2, HLA-DRA, HLA-DRB1, LSP1, MRC2, TGFB2	18
GOTERM_BP_DIRECT|||GO:0002504~antigen processing and presentation of peptide or polysaccharide antigen via MHC class II		HLA-DMA, HLA-DMB, HLA-DOA, HLA-DPA1, HLA-DPB1, HLA-DQA1, HLA-DQA2, HLA-DRA, HLA-DRB1	10
KEGG_PATHWAY|||hsa05166:HTLV-I infection		CD3E, HLA-DMA, HLA-DMB, HLA-DOA, HLA-DPA1, HLA-DPB1, HLA-DQA1, HLA-DQA2, HLA-DRA, HLA-DRB1, IL2RB, ITGAL, JAK3, PDGFA, TGFB2	15
GOTERM_BP_DIRECT|||GO:0031295~T cell costimulation		CD3E, DPP4, HLA-DPA1, HLA-DPB1, HLA-DQA1, HLA-DQA2, HLA-DRA, HLA-DRB1, PDCD1LG2	10
INTERPRO|||IPR011162:MHC classes I/II-like antigen recognition protein		HLA-DMA, HLA-DMB, HLA-DOA, HLA-DPA1, HLA-DPB1, HLA-DQA1, HLA-DQA2, HLA-DRA, HLA-DRB1	10
UP_KEYWORDS|||Immunity		ANXA1, APOBEC3F, APOBEC3G, C1RL, CASP4, CD3E, CD7, CD74, FCGR2A, GBP1, HLA-DMA, HLA-DMB, HLA-DOA, HLA-DPA1, HLA-DPB1, HLA-DQA1, HLA-DQA2, HLA-DRA, HLA-DRB1, IFI30, JAK3, LTF, MYO1G, RNF135, SH2D1A, TLR8, ZNF683	28
UP_KEYWORDS|||Basement membrane		ANXA2, ANXA2P2, VWA1	3
GOTERM_BP_DIRECT|||GO:0019882~antigen processing and presentation		CD74, HLA-DMB, HLA-DPA1, HLA-DPB1, HLA-DQA1, HLA-DQA2, HLA-DRA, HLA-DRB1, RAB32, RAB34	11
UP_KEYWORDS|||Cell membrane	KCNIP2	ADAM12, ANXA1, CA2, CD109, CD3E, CD58, CD74, CLIC1, DIRAS3, DPP4, EVC2, FCGR2A, FCGR2C, FCGR3A, GAPT, GBP1, GNG5, GPR1, GPR37, GPR65, HLA-DPA1, HLA-DPB1, HLA-DQA1, HLA-DQA2, HLA-DRA, HLA-DRB1, IQGAP1, ITGAL, LGR6, LPAR1, LSP1, MSN, MYO1G, OSCAR, PDCD1LG2, PDPN, PMP22, PTRF, RGS3, S100A6, S1PR3, SWAP70, TRPM8, XKR8	45
UP_KEYWORDS|||Glycoprotein		ABCC3, ADAM12, APOL1, B3GNT7, C1RL, CD109, CD58, CD7, CD74, CHI3L1, CHST6, CLCF1, COL21A1, CTSW, CTSZ, DPP4, EMILIN2, EMILIN3, EMP3, EVC2, FCGBP, FCGR2A, FCGR2C, FCGR3A, FGFRL1, FKBP9, FSTL1, GALNT3, GDF15, GPR1, GPR37, GPR65, GZMA, HLA-DMA, HLA-DMB, HLA-DOA, HLA-DPA1, HLA-DPB1, HLA-DQA1, HLA-DQA2, HLA-DRA, HLA-DRB1, IFI30, IGFBP2, IL2RB, ITGA2, ITGAL, KCNK5, LGR6, LPAR1, LTF, LUM, MMP9, MOXD1, M…	83
GOTERM_CC_DIRECT|||GO:0030669~clathrin-coated endocytic vesicle membrane		CD74, HLA-DPA1, HLA-DPB1, HLA-DQA1, HLA-DQA2, HLA-DRA, HLA-DRB1	8
GOTERM_BP_DIRECT|||GO:0001525~angiogenesis		ANG, ANXA2, HMOX1, HOXB3, HTATIP2, MEOX2, PDGFA, SRPX2, TGFB2, TNFRSF12A, VAV3	11
INTERPRO|||IPR003006:Immunoglobulin/major histocompatibility complex, conserved site		HLA-DMA, HLA-DMB, HLA-DOA, HLA-DPA1, HLA-DPB1, HLA-DQA1, HLA-DQA2, HLA-DRA, HLA-DRB1	9
GOTERM_MF_DIRECT|||GO:0005509~calcium ion binding	KCNIP2	ANXA1, ANXA2, ANXA2P2, FKBP9, FSTL1, GALNT3, GSN, IQGAP1, MYL12A, PLA2G5, PLS3, S100A11, S100A4, S100A6, SWAP70	16
UP_KEYWORDS|||Inflammatory response		ANXA1, CASP4, CHI3L1, CXCL10, CXCL11, CXCL9, RARRES2, TLR8	9
GOTERM_BP_DIRECT|||GO:0006955~immune response		CD7, CD74, CIITA, CTSW, CXCL10, CXCL11, CXCL9, FCGR2C, FCGR3A, GPR65, GZMA, HAMP, HLA-DMA, HLA-DMB, HLA-DOA, HLA-DPA1, HLA-DPB1, HLA-DQA1, HLA-DQA2, HLA-DRA, HLA-DRB1, PDCD1LG2, TNFRSF11B	23
KEGG_PATHWAY|||hsa04612:Antigen processing and presentation		CD74, CIITA, HLA-DMA, HLA-DMB, HLA-DOA, HLA-DPA1, HLA-DPB1, HLA-DQA1, HLA-DQA2, HLA-DRA, HLA-DRB1, IFI30	12
KEGG_PATHWAY|||hsa05416:Viral myocarditis		CASP8, HLA-DMA, HLA-DMB, HLA-DOA, HLA-DPA1, HLA-DPB1, HLA-DQA1, HLA-DQA2, HLA-DRA, HLA-DRB1, ITGAL	11
GOTERM_BP_DIRECT|||GO:0030198~extracellular matrix organization		COL5A1, ITGA2, ITGAL, LUM, PDGFA, POSTN, SPINT1, TNFRSF11B, VWA1	9
UP_KEYWORDS|||Transmembrane helix	KCNJ11	ABCC3, ADAM12, APOL1, B3GNT7, C10ORF105, CD3E, CD58, CD7, CD74, CHST6, CLIC1, DPP4, DPY19L1, EMP3, EVC2, FAM180B, FCGR2A, FCGR2C, FCGR3A, FGFRL1, GALNT3, GAPT, GPR1, GPR37, GPR65, GPX8, HLA-DMA, HLA-DMB, HLA-DOA, HLA-DPA1, HLA-DPB1, HLA-DQA1, HLA-DQA2, HLA-DRA, HLA-DRB1, HMOX1, IL2RB, ITGA2, ITGAL, KCNK5, LGR6, LPAR1, MAOB, MOXD1, MRC2, OSCAR, PDCD1LG2, PDE6B, PDPN, PLLP, PLP2, PMP22, S1PR3, SDC4…	68
UP_SEQ_FEATURE|||disulfide bond		ADAM12, ANG, C1RL, CD3E, CD58, CD7, CD74, CHI3L1, CLIC1, CTSW, CTSZ, CXCL10, CXCL11, CXCL9, DPP4, EMILIN2, EMILIN3, FABP5, FCGBP, FCGR2A, FCGR2C, FCGR3A, FGFBP2, FGFRL1, FSTL1, GALNT3, GDF15, GNLY, GPR1, GPR37, GPR65, GSN, GZMA, GZMK, HAMP, HLA-DMA, HLA-DOA, HLA-DPA1, HLA-DPB1, HLA-DQA1, HLA-DQA2, HLA-DRA, HLA-DRB1, IFI30, IGFBP2, IL2RB, ITGA2, ITGAL, KCNK5, LGR6, LTF, LUM, MMP9, MOXD1, MRC2, NPC…	74
UP_KEYWORDS|||Signal		ADAM12, ANG, APOL1, BCO2, C1RL, CCDC152, CD109, CD3E, CD58, CD7, CHI3L1, CHST6, CLCF1, COL21A1, COL5A1, CTSW, CTSZ, CXCL10, CXCL11, CXCL9, EMILIN2, EMILIN3, EVC2, FCGBP, FCGR2A, FCGR2C, FCGR3A, FGFBP2, FGFRL1, FKBP9, FSTL1, GDF15, GNLY, GPR37, GSN, GZMA, GZMK, HAMP, HLA-DMA, HLA-DMB, HLA-DOA, HLA-DPA1, HLA-DPB1, HLA-DQA1, HLA-DQA2, HLA-DRA, HLA-DRB1, IFI30, IGFBP2, IL2RB, IQGAP1, ITGA2, ITGAL, LG…	87
KEGG_PATHWAY|||hsa04514:Cell adhesion molecules (CAMs)		CD58, HLA-DMA, HLA-DMB, HLA-DOA, HLA-DPA1, HLA-DPB1, HLA-DQA1, HLA-DQA2, HLA-DRA, HLA-DRB1, ITGAL, PDCD1LG2, SDC4	13
GOTERM_CC_DIRECT|||GO:0070062~extracellular exosome		ALDH1A3, ANG, ANXA1, ANXA2, ANXA2P2, C1RL, CA2, CAPG, CD58, CD7, CD74, CHI3L1, CLCF1, CLIC1, COL5A1, CPPED1, CRYZ, CTSZ, DPP4, FABP5, FCGBP, FCGR2A, FCGR3A, FSTL1, FTL, GALNT3, GDF15, GNG5, GSN, HEBP1, HLA-DMA, HLA-DRA, HLA-DRB1, IGFBP2, IQGAP1, ITGAL, LSP1, LTF, LUM, MAOB, MMP9, MSN, MYL12A, MYO1G, NPC2, OSCAR, PDCD1LG2, PLAT, PLAU, PLLP, PLP2, PTGS1, PYGL, RAB34, RARRES2, RNASE4, S100A11, S100A…	71

## Sheet: intersection_selection
TERM	selection	DOWNREGULATED GENES	UPREGULATED GENES	GENE NUMBER
GOTERM_CC_DIRECT|||GO:0009897~external side of plasma membrane	yes		CD3E, CD74, CXCL10, CXCL9, FCGR3A, HLA-DRB1, IL2RB, ITGA2, PDPN, SERPINA5, TRPM8	11
UP_KEYWORDS|||Cell adhesion	yes		ADAM12, DPP4, EMILIN2, ITGA2, ITGAL, POSTN, SRPX2, TNFAIP6, TNFRSF12A, TRIP6, WISP1	11
UP_KEYWORDS|||Membrane	yes	KCNIP2, KCNJ11	ABCC3, ADAM12, ANXA1, APOL1, B3GNT7, C10ORF105, CA2, CASP4, CD109, CD3E, CD58, CD7, CD74, CHST6, CLIC1, CYP27A1, DIRAS3, DPP4, DPY19L1, EMP3, EVC2, FAM180B, FCGR2A, FCGR2C, FCGR3A, FGFRL1, FLNC, GALNT3, GAPT, GBP1, GNG5, GPR1, GPR37, GPR65, GPX8, HLA-DMA, HLA-DMB, HLA-DOA, HLA-DPA1, HLA-DPB1, HLA-DQA1, HLA-DQA2, HLA-DRA, HLA-DRB1, HMOX1, IL2RB, IQGAP1, ITGA2, ITGAL, JAK3, KCNK5, LGR6, LPAR1, LSP1…	91
UP_KEYWORDS|||Transmembrane	yes	KCNJ11	ABCC3, ADAM12, APOL1, B3GNT7, C10ORF105, CD3E, CD58, CD7, CD74, CHST6, CLIC1, DPP4, DPY19L1, EMP3, EVC2, FAM180B, FCGR2A, FCGR2C, FCGR3A, FGFRL1, GALNT3, GAPT, GPR1, GPR37, GPR65, GPX8, HLA-DMA, HLA-DMB, HLA-DOA, HLA-DPA1, HLA-DPB1, HLA-DQA1, HLA-DQA2, HLA-DRA, HLA-DRB1, HMOX1, IL2RB, ITGA2, ITGAL, KCNK5, LGR6, LPAR1, MAOB, MOXD1, MRC2, OSCAR, PDCD1LG2, PDE6B, PDPN, PLLP, PLP2, PMP22, S1PR3, SDC4…	68
GOTERM_CC_DIRECT|||GO:0030666~endocytic vesicle membrane	yes		CD74, HLA-DPA1, HLA-DPB1, HLA-DQA1, HLA-DQA2, HLA-DRA, HLA-DRB1	7
GOTERM_CC_DIRECT|||GO:0005576~extracellular region	yes		ADAM12, ANG, ANXA1, APOL1, CASP4, CLCF1, COL21A1, COL5A1, CTSW, CXCL10, CXCL11, CXCL9, EMILIN2, FSTL1, GBP1, GDF15, GSN, GZMA, GZMK, HAMP, HEBP1, IFI30, IGFBP2, LTF, LUM, MMP9, OSCAR, PDGFA, PLA2G5, PLAT, PLAU, RARRES2, RNASE4, SERPINA1, SERPINA5, SFRP4, SPINT1, TGFB2, TNFRSF11B	39
GOTERM_CC_DIRECT|||GO:0009986~cell surface	yes		ANXA1, ANXA2, CD109, CD58, CD74, CIITA, DPP4, HLA-DMA, HLA-DPA1, HLA-DPB1, HLA-DRA, HLA-DRB1, ITGA2, ITGAL, LPAR1, LTF, PDGFA, PLAT, PLAU, SDC4, SFRP4, SRPX2, TNFRSF12A	23
GOTERM_MF_DIRECT|||GO:0005102~receptor binding	yes		ANG, ANXA1, CD58, CLCF1, CXCL10, DPP4, HAMP, IGFBP2, JAK3, MSN, PIPOX, PLAT, RARRES2, SRPX2, TGFB2	15
GOTERM_CC_DIRECT|||GO:0005615~extracellular space	yes		ANG, ANXA1, ANXA2, APOL1, C1RL, CA2, CD109, CHI3L1, CLIC1, CTSW, CTSZ, CXCL10, CXCL11, CXCL9, FGFBP2, FSTL1, GDF15, GNLY, GSN, HAMP, HMOX1, IGFBP2, LTF, LUM, MMP9, MSN, PDGFA, PLAT, PLAU, POSTN, S100A11, S100A4, SERPINA1, SERPINA5, SFRP4, SPINT1, SRPX2, TGFB2, TNFAIP6, TNFRSF11B, VWA1, WISP1	42
UP_SEQ_FEATURE|||topological domain:Extracellular	yes	KCNJ11	ABCC3, ADAM12, CD3E, CD58, CD7, CD74, DPP4, FCGR2A, FCGR2C, FCGR3A, FGFRL1, GPR1, GPR37, GPR65, HLA-DOA, HLA-DPA1, HLA-DPB1, HLA-DQA1, HLA-DQA2, HLA-DRA, HLA-DRB1, IL2RB, ITGA2, ITGAL, LGR6, LPAR1, MRC2, OSCAR, PDCD1LG2, PDPN, PLLP, S1PR3, SDC4, SLC2A10, TLR8, TMEM154, TNFRSF12A, TRAF3IP3, TRPM8	40
UP_KEYWORDS|||Extracellular matrix	yes		ANXA2, ANXA2P2, COL21A1, COL5A1, EMILIN2, EMILIN3, LUM, MMP9, POSTN, SERPINA1, VWA1	11
GOTERM_CC_DIRECT|||GO:0005925~focal adhesion	yes		ANXA1, DPP4, FLNC, GSN, IQGAP1, ITGA2, MRC2, MSN, PLAU, SDC4, TRIP6, VIM	12
GOTERM_CC_DIRECT|||GO:0031012~extracellular matrix	yes		ANXA2, COL21A1, COL5A1, EMILIN2, EMILIN3, LUM, PLAT, POSTN, RARRES2, TGFB2, VIM	11
GOTERM_CC_DIRECT|||GO:0005886~plasma membrane	yes	KCNIP2, KCNJ11	ABCC3, ADAM12, ANXA1, ANXA2, CA2, CD109, CD3E, CD58, CD7, CD74, CISH, CLIC1, CPPED1, CTSZ, DIRAS3, DPP4, EMP3, FCGR2A, FCGR2C, FCGR3A, FGFRL1, FLNC, GAPT, GBP1, GNG5, GPR37, GPR65, GSN, HLA-DOA, HLA-DPA1, HLA-DPB1, HLA-DQA1, HLA-DQA2, HLA-DRA, HLA-DRB1, HMOX1, IFI30, IL2RB, IQGAP1, ITGA2, ITGAL, LGR6, LPAR1, LSP1, MSN, MYO1G, OSCAR, PDCD1LG2, PDE6B, PDPN, PLA2G5, PLAU, PLP2, PMP22, PYGL, RGS3, S1…	71
UP_KEYWORDS|||Basement membrane	yes		ANXA2, ANXA2P2, VWA1	3
UP_KEYWORDS|||Cell membrane	yes	KCNIP2	ADAM12, ANXA1, CA2, CD109, CD3E, CD58, CD74, CLIC1, DIRAS3, DPP4, EVC2, FCGR2A, FCGR2C, FCGR3A, GAPT, GBP1, GNG5, GPR1, GPR37, GPR65, HLA-DPA1, HLA-DPB1, HLA-DQA1, HLA-DQA2, HLA-DRA, HLA-DRB1, IQGAP1, ITGAL, LGR6, LPAR1, LSP1, MSN, MYO1G, OSCAR, PDCD1LG2, PDPN, PMP22, PTRF, RGS3, S100A6, S1PR3, SWAP70, TRPM8, XKR8	45
GOTERM_BP_DIRECT|||GO:0030198~extracellular matrix organization	yes		COL5A1, ITGA2, ITGAL, LUM, PDGFA, POSTN, SPINT1, TNFRSF11B, VWA1	9
GOTERM_CC_DIRECT|||GO:0070062~extracellular exosome	yes		ALDH1A3, ANG, ANXA1, ANXA2, ANXA2P2, C1RL, CA2, CAPG, CD58, CD7, CD74, CHI3L1, CLCF1, CLIC1, COL5A1, CPPED1, CRYZ, CTSZ, DPP4, FABP5, FCGBP, FCGR2A, FCGR3A, FSTL1, FTL, GALNT3, GDF15, GNG5, GSN, HEBP1, HLA-DMA, HLA-DRA, HLA-DRB1, IGFBP2, IQGAP1, ITGAL, LSP1, LTF, LUM, MAOB, MMP9, MSN, MYL12A, MYO1G, NPC2, OSCAR, PDCD1LG2, PLAT, PLAU, PLLP, PLP2, PTGS1, PYGL, RAB34, RARRES2, RNASE4, S100A11, S100A…	71
GOTERM_BP_DIRECT|||GO:0060333~interferon-gamma-mediated signaling pathway	no		CIITA, GBP1, HLA-DPA1, HLA-DPB1, HLA-DQA1, HLA-DQA2, HLA-DRA, HLA-DRB1, IFI30	10
GOTERM_MF_DIRECT|||GO:0008201~heparin binding	no		ANG, COL5A1, CXCL10, CXCL11, FGFRL1, FSTL1, LTF, PLA2G5, POSTN, SERPINA5, WISP1	11
KEGG_PATHWAY|||hsa05330:Allograft rejection	no		HLA-DMA, HLA-DMB, HLA-DOA, HLA-DPA1, HLA-DPB1, HLA-DQA1, HLA-DQA2, HLA-DRA, HLA-DRB1	10
UP_KEYWORDS|||Calcium	no	KCNIP2	ANXA1, ANXA2, ANXA2P2, COL5A1, FKBP9, GSN, ITGA2, ITGAL, MMP9, MRC2, MYL12A, PLA2G5, PLS3, S100A11, S100A4, S100A6	17
SMART|||SM00920:SM00920	no		HLA-DMA, HLA-DOA, HLA-DPA1, HLA-DQA1, HLA-DQA2, HLA-DRA	7
GOTERM_BP_DIRECT|||GO:0042102~positive regulation of T cell proliferation	no		ANXA1, CD3E, HLA-DMB, HLA-DPA1, HLA-DPB1, JAK3, PDCD1LG2	8
GOTERM_BP_DIRECT|||GO:0006954~inflammatory response	no		ANXA1, CASP4, CHI3L1, CIITA, CXCL10, CXCL11, CXCL9, HDAC4, ITGAL, PTGS1, RARRES2, S1PR3, TLR8, TNFAIP6, TNFRSF11B	15
UP_KEYWORDS|||Polymorphism	no	KCNJ11	ABCC3, ADAM12, AIM1, ALDH1A3, AMPD3, ANG, ANXA2, APOBEC3F, APOBEC3G, APOL1, B3GNT7, BANK1, BCAT1, BCO2, C10ORF11, C11ORF63, C1RL, CA2, CA3, CAPG, CARD16, CASP4, CASP8, CCDC152, CD109, CD58, CD7, CHI3L1, CHST6, CIITA, CMYA5, COL21A1, COL5A1, CPPED1, CRYZ, CTSW, CTSZ, CXCL11, CYP27A1, DDIT4L, DNAH11, DPY19L1, DPYD, EMILIN2, EMILIN3, EMP3, EVC2, EYA4, FAM114A1, FAM180B, FCGBP, FCGR2A, FCGR3A, FGFBP2…	159
UP_SEQ_FEATURE|||region of interest:Connecting peptide	no		HLA-DMA, HLA-DMB, HLA-DOA, HLA-DPA1, HLA-DPB1, HLA-DQA1, HLA-DQA2, HLA-DRA, HLA-DRB1, PLAU	11
KEGG_PATHWAY|||hsa05145:Toxoplasmosis	no		CASP8, CIITA, HLA-DMA, HLA-DMB, HLA-DOA, HLA-DPA1, HLA-DPB1, HLA-DQA1, HLA-DQA2, HLA-DRA, HLA-DRB1, SOCS1, TGFB2	14
KEGG_PATHWAY|||hsa05322:Systemic lupus erythematosus	no		FCGR2A, FCGR3A, HLA-DMA, HLA-DMB, HLA-DOA, HLA-DPA1, HLA-DPB1, HLA-DQA1, HLA-DQA2, HLA-DRA, HLA-DRB1	11
KEGG_PATHWAY|||hsa05320:Autoimmune thyroid disease	no		HLA-DMA, HLA-DMB, HLA-DOA, HLA-DPA1, HLA-DPB1, HLA-DQA1, HLA-DQA2, HLA-DRA, HLA-DRB1	10
UP_SEQ_FEATURE|||glycosylation site:N-linked (GlcNAc...)	no		ABCC3, ADAM12, APOL1, B3GNT7, C1RL, CD109, CD58, CD7, CD74, CHI3L1, CHST6, CLCF1, COL21A1, CTSW, CTSZ, DPP4, EMILIN2, EMILIN3, EMP3, EVC2, FCGBP, FCGR2A, FCGR2C, FCGR3A, FGFRL1, FKBP9, FSTL1, GALNT3, GDF15, GPR1, GPR37, GPR65, GZMA, HLA-DMA, HLA-DMB, HLA-DOA, HLA-DPA1, HLA-DPB1, HLA-DQA1, HLA-DQA2, HLA-DRA, HLA-DRB1, IFI30, IL2RB, ITGA2, ITGAL, KCNK5, LGR6, LPAR1, LTF, MMP9, MOXD1, MRC2, NPC2, OS…	76
KEGG_PATHWAY|||hsa05140:Leishmaniasis	no		FCGR2A, FCGR2C, FCGR3A, HLA-DMA, HLA-DMB, HLA-DOA, HLA-DPA1, HLA-DPB1, HLA-DQA1, HLA-DQA2, HLA-DRA, HLA-DRB1, TGFB2	14
GOTERM_CC_DIRECT|||GO:0042613~MHC class II protein complex	no		CD74, HLA-DMA, HLA-DMB, HLA-DOA, HLA-DPA1, HLA-DPB1, HLA-DQA1, HLA-DQA2, HLA-DRA, HLA-DRB1	11
INTERPRO|||IPR001003:MHC class II, alpha chain, N-terminal	no		HLA-DMA, HLA-DOA, HLA-DPA1, HLA-DQA1, HLA-DQA2, HLA-DRA	7
INTERPRO|||IPR014745:MHC class II, alpha/beta chain, N-terminal	no		HLA-DMA, HLA-DMB, HLA-DOA, HLA-DPA1, HLA-DPB1, HLA-DQA1, HLA-DQA2, HLA-DRA, HLA-DRB1	10
UP_KEYWORDS|||MHC II	no		HLA-DMA, HLA-DMB, HLA-DOA, HLA-DPA1, HLA-DPB1, HLA-DQA1, HLA-DQA2, HLA-DRA, HLA-DRB1	10
UP_KEYWORDS|||Disulfide bond	no		ADAM12, ANG, ANXA1, C1RL, CD109, CD3E, CD58, CD7, CD74, CHI3L1, CLIC1, COL5A1, CTSW, CTSZ, CXCL10, CXCL11, CXCL9, DPP4, EMILIN2, EMILIN3, FABP5, FCGBP, FCGR2A, FCGR2C, FCGR3A, FGFBP2, FGFRL1, FSTL1, GALNT3, GDF15, GNLY, GPR1, GPR37, GPR65, GSN, GZMA, GZMK, HAMP, HLA-DMA, HLA-DMB, HLA-DOA, HLA-DPA1, HLA-DPB1, HLA-DQA1, HLA-DQA2, HLA-DRA, HLA-DRB1, IFI30, IGFBP2, IL2RB, ITGA2, ITGAL, KCNK5, LGR6, L…	82
KEGG_PATHWAY|||hsa05310:Asthma	no		HLA-DMA, HLA-DMB, HLA-DOA, HLA-DPA1, HLA-DPB1, HLA-DQA1, HLA-DQA2, HLA-DRA, HLA-DRB1	10
GOTERM_CC_DIRECT|||GO:0071556~integral component of lumenal side of endoplasmic reticulum membrane	no		CD74, HLA-DPA1, HLA-DPB1, HLA-DQA1, HLA-DQA2, HLA-DRA, HLA-DRB1	8
KEGG_PATHWAY|||hsa05164:Influenza A	no		CIITA, CXCL10, HLA-DMA, HLA-DMB, HLA-DOA, HLA-DPA1, HLA-DPB1, HLA-DQA1, HLA-DQA2, HLA-DRA, HLA-DRB1	12
UP_KEYWORDS|||Secreted	no		ADAM12, ANG, ANXA1, ANXA2, ANXA2P2, APOL1, C1RL, CAPG, CASP4, CHI3L1, CLCF1, COL21A1, COL5A1, CXCL10, CXCL11, CXCL9, DPP4, EMILIN2, EMILIN3, FCGBP, FCGR3A, FGFBP2, FSTL1, GBP1, GDF15, GNLY, GSN, GZMA, GZMK, HAMP, IFI30, IGFBP2, LTF, LUM, MMP9, NPC2, OSCAR, PDCD1LG2, PDGFA, PLA2G5, PLAT, PLAU, POSTN, RARRES2, RNASE4, SDC4, SERPINA1, SERPINA5, SFRP4, SPINT1, SRPX2, TGFB2, TNFRSF11B, VWA1, WISP1	55
UP_KEYWORDS|||Lysosome	no		CD74, CTSZ, HLA-DMA, HLA-DMB, HLA-DOA, HLA-DPA1, HLA-DPB1, HLA-DQA1, HLA-DQA2, HLA-DRA, HLA-DRB1, IFI30, NPC2, TMBIM1	14
UP_SEQ_FEATURE|||topological domain:Cytoplasmic	no	KCNJ11	ABCC3, ADAM12, B3GNT7, CD3E, CD58, CD7, CD74, CHST6, DPP4, FCGR2A, FCGR2C, FCGR3A, FGFRL1, GALNT3, GPR1, GPR37, GPR65, HLA-DMA, HLA-DMB, HLA-DOA, HLA-DPA1, HLA-DPB1, HLA-DQA1, HLA-DQA2, HLA-DRA, HLA-DRB1, IL2RB, ITGA2, ITGAL, KCNK5, LGR6, LPAR1, MAOB, MRC2, OSCAR, PDCD1LG2, PDPN, PLLP, S1PR3, SDC4, SLC2A10, STEAP3, TLR8, TMEM154, TNFRSF12A, TRAF3IP3, TRPM8	48
KEGG_PATHWAY|||hsa05321:Inflammatory bowel disease (IBD)	no		HLA-DMA, HLA-DMB, HLA-DOA, HLA-DPA1, HLA-DPB1, HLA-DQA1, HLA-DQA2, HLA-DRA, HLA-DRB1, TGFB2	11
UP_SEQ_FEATURE|||signal peptide	no		ADAM12, ANG, APOL1, C1RL, CD109, CD3E, CD58, CD7, CHI3L1, CLCF1, COL21A1, COL5A1, CTSW, CTSZ, CXCL10, CXCL11, CXCL9, EMILIN2, EMILIN3, FCGBP, FCGR2A, FCGR2C, FCGR3A, FGFBP2, FGFRL1, FKBP9, FSTL1, GDF15, GNLY, GPR37, GSN, GZMA, GZMK, HAMP, HLA-DMA, HLA-DMB, HLA-DOA, HLA-DPA1, HLA-DPB1, HLA-DQA1, HLA-DQA2, HLA-DRA, HLA-DRB1, IFI30, IGFBP2, IL2RB, ITGA2, ITGAL, LGR6, LTF, LUM, METTL7B, MMP9, MOXD1, …	82
KEGG_PATHWAY|||hsa05169:Epstein-Barr virus infection	no		CD58, HLA-DPA1, HLA-DPB1, HLA-DQA1, HLA-DQA2, HLA-DRA, HLA-DRB1, ITGAL, JAK3, VIM	11
KEGG_PATHWAY|||hsa05332:Graft-versus-host disease	no		HLA-DMA, HLA-DMB, HLA-DOA, HLA-DPA1, HLA-DPB1, HLA-DQA1, HLA-DQA2, HLA-DRA, HLA-DRB1	10
KEGG_PATHWAY|||hsa04940:Type I diabetes mellitus	no		HLA-DMA, HLA-DMB, HLA-DOA, HLA-DPA1, HLA-DPB1, HLA-DQA1, HLA-DQA2, HLA-DRA, HLA-DRB1	9
UP_KEYWORDS|||Zymogen	no		ADAM12, CASP4, CASP8, CTSW, CTSZ, GZMA, GZMK, MMP9, PLAT, PLAU	10
KEGG_PATHWAY|||hsa05323:Rheumatoid arthritis	no		HLA-DMA, HLA-DMB, HLA-DOA, HLA-DPA1, HLA-DPB1, HLA-DQA1, HLA-DQA2, HLA-DRA, HLA-DRB1, ITGAL, TGFB2	12
UP_SEQ_FEATURE|||sequence variant	no	KCNJ11	ABCC3, ADAM12, AIM1, ALDH1A3, AMPD3, ANG, ANXA2, APOBEC3F, APOBEC3G, APOL1, B3GNT7, BANK1, BCAT1, BCO2, C10ORF11, C11ORF63, C1RL, CA2, CA3, CAPG, CARD16, CASP4, CASP8, CCDC152, CD109, CD58, CD7, CHI3L1, CHST6, CIITA, CLCF1, CMYA5, COL21A1, COL5A1, CPPED1, CRYZ, CTSW, CTSZ, CXCL11, CYP27A1, DDIT4L, DNAH11, DPY19L1, DPYD, EMILIN2, EMILIN3, EMP3, EVC2, EYA4, FAM114A1, FAM180B, FCGBP, FCGR2A, FCGR2C,…	160
KEGG_PATHWAY|||hsa04145:Phagosome	no		FCGR2A, FCGR2C, FCGR3A, HLA-DMA, HLA-DMB, HLA-DOA, HLA-DPA1, HLA-DPB1, HLA-DQA1, HLA-DQA2, HLA-DRA, HLA-DRB1, ITGA2, MRC2, TUBA1C	15
KEGG_PATHWAY|||hsa04974:Protein digestion and absorption	no		COL21A1, COL5A1, DPP4, KCNK5	4
GOTERM_MF_DIRECT|||GO:0032395~MHC class II receptor activity	no		HLA-DMA, HLA-DOA, HLA-DPA1, HLA-DPB1, HLA-DQA1, HLA-DQA2, HLA-DRA, HLA-DRB1	9
UP_SEQ_FEATURE|||domain:Ig-like C1-type	no		HLA-DMA, HLA-DMB, HLA-DOA, HLA-DPA1, HLA-DPB1, HLA-DQA1, HLA-DQA2, HLA-DRA, HLA-DRB1	10
KEGG_PATHWAY|||hsa05150:Staphylococcus aureus infection	no		FCGR2A, FCGR2C, FCGR3A, HLA-DMA, HLA-DMB, HLA-DOA, HLA-DPA1, HLA-DPB1, HLA-DQA1, HLA-DQA2, HLA-DRA, HLA-DRB1, ITGAL	14
UP_KEYWORDS|||Innate immunity	no		ANXA1, APOBEC3F, APOBEC3G, C1RL, CASP4, JAK3, RNF135, SH2D1A, TLR8, ZNF683	11
GOTERM_BP_DIRECT|||GO:0001666~response to hypoxia	no		ANG, DPP4, HMOX1, ITGA2, PLAT, PLAU, POSTN, SOD2, TGFB2	9
KEGG_PATHWAY|||hsa04672:Intestinal immune network for IgA production	no		HLA-DMA, HLA-DMB, HLA-DOA, HLA-DPA1, HLA-DPB1, HLA-DQA1, HLA-DQA2, HLA-DRA, HLA-DRB1	9
KEGG_PATHWAY|||hsa05152:Tuberculosis	no		CASP8, CD74, CIITA, FCGR2A, FCGR2C, FCGR3A, HLA-DMA, HLA-DMB, HLA-DOA, HLA-DPA1, HLA-DPB1, HLA-DQA1, HLA-DQA2, HLA-DRA, HLA-DRB1, LSP1, MRC2, TGFB2	18
GOTERM_BP_DIRECT|||GO:0002504~antigen processing and presentation of peptide or polysaccharide antigen via MHC class II	no		HLA-DMA, HLA-DMB, HLA-DOA, HLA-DPA1, HLA-DPB1, HLA-DQA1, HLA-DQA2, HLA-DRA, HLA-DRB1	10
KEGG_PATHWAY|||hsa05166:HTLV-I infection	no		CD3E, HLA-DMA, HLA-DMB, HLA-DOA, HLA-DPA1, HLA-DPB1, HLA-DQA1, HLA-DQA2, HLA-DRA, HLA-DRB1, IL2RB, ITGAL, JAK3, PDGFA, TGFB2	15
GOTERM_BP_DIRECT|||GO:0031295~T cell costimulation	no		CD3E, DPP4, HLA-DPA1, HLA-DPB1, HLA-DQA1, HLA-DQA2, HLA-DRA, HLA-DRB1, PDCD1LG2	10
INTERPRO|||IPR011162:MHC classes I/II-like antigen recognition protein	no		HLA-DMA, HLA-DMB, HLA-DOA, HLA-DPA1, HLA-DPB1, HLA-DQA1, HLA-DQA2, HLA-DRA, HLA-DRB1	10
UP_KEYWORDS|||Immunity	no		ANXA1, APOBEC3F, APOBEC3G, C1RL, CASP4, CD3E, CD7, CD74, FCGR2A, GBP1, HLA-DMA, HLA-DMB, HLA-DOA, HLA-DPA1, HLA-DPB1, HLA-DQA1, HLA-DQA2, HLA-DRA, HLA-DRB1, IFI30, JAK3, LTF, MYO1G, RNF135, SH2D1A, TLR8, ZNF683	28
GOTERM_BP_DIRECT|||GO:0019882~antigen processing and presentation	no		CD74, HLA-DMB, HLA-DPA1, HLA-DPB1, HLA-DQA1, HLA-DQA2, HLA-DRA, HLA-DRB1, RAB32, RAB34	11
UP_KEYWORDS|||Glycoprotein	no		ABCC3, ADAM12, APOL1, B3GNT7, C1RL, CD109, CD58, CD7, CD74, CHI3L1, CHST6, CLCF1, COL21A1, CTSW, CTSZ, DPP4, EMILIN2, EMILIN3, EMP3, EVC2, FCGBP, FCGR2A, FCGR2C, FCGR3A, FGFRL1, FKBP9, FSTL1, GALNT3, GDF15, GPR1, GPR37, GPR65, GZMA, HLA-DMA, HLA-DMB, HLA-DOA, HLA-DPA1, HLA-DPB1, HLA-DQA1, HLA-DQA2, HLA-DRA, HLA-DRB1, IFI30, IGFBP2, IL2RB, ITGA2, ITGAL, KCNK5, LGR6, LPAR1, LTF, LUM, MMP9, MOXD1, M…	83
GOTERM_CC_DIRECT|||GO:0030669~clathrin-coated endocytic vesicle membrane	no		CD74, HLA-DPA1, HLA-DPB1, HLA-DQA1, HLA-DQA2, HLA-DRA, HLA-DRB1	8
GOTERM_BP_DIRECT|||GO:0001525~angiogenesis	no		ANG, ANXA2, HMOX1, HOXB3, HTATIP2, MEOX2, PDGFA, SRPX2, TGFB2, TNFRSF12A, VAV3	11
INTERPRO|||IPR003006:Immunoglobulin/major histocompatibility complex, conserved site	no		HLA-DMA, HLA-DMB, HLA-DOA, HLA-DPA1, HLA-DPB1, HLA-DQA1, HLA-DQA2, HLA-DRA, HLA-DRB1	9
GOTERM_MF_DIRECT|||GO:0005509~calcium ion binding	no	KCNIP2	ANXA1, ANXA2, ANXA2P2, FKBP9, FSTL1, GALNT3, GSN, IQGAP1, MYL12A, PLA2G5, PLS3, S100A11, S100A4, S100A6, SWAP70	16
UP_KEYWORDS|||Inflammatory response	no		ANXA1, CASP4, CHI3L1, CXCL10, CXCL11, CXCL9, RARRES2, TLR8	9
GOTERM_BP_DIRECT|||GO:0006955~immune response	no		CD7, CD74, CIITA, CTSW, CXCL10, CXCL11, CXCL9, FCGR2C, FCGR3A, GPR65, GZMA, HAMP, HLA-DMA, HLA-DMB, HLA-DOA, HLA-DPA1, HLA-DPB1, HLA-DQA1, HLA-DQA2, HLA-DRA, HLA-DRB1, PDCD1LG2, TNFRSF11B	23
KEGG_PATHWAY|||hsa04612:Antigen processing and presentation	no		CD74, CIITA, HLA-DMA, HLA-DMB, HLA-DOA, HLA-DPA1, HLA-DPB1, HLA-DQA1, HLA-DQA2, HLA-DRA, HLA-DRB1, IFI30	12
KEGG_PATHWAY|||hsa05416:Viral myocarditis	no		CASP8, HLA-DMA, HLA-DMB, HLA-DOA, HLA-DPA1, HLA-DPB1, HLA-DQA1, HLA-DQA2, HLA-DRA, HLA-DRB1, ITGAL	11
UP_KEYWORDS|||Transmembrane helix	no	KCNJ11	ABCC3, ADAM12, APOL1, B3GNT7, C10ORF105, CD3E, CD58, CD7, CD74, CHST6, CLIC1, DPP4, DPY19L1, EMP3, EVC2, FAM180B, FCGR2A, FCGR2C, FCGR3A, FGFRL1, GALNT3, GAPT, GPR1, GPR37, GPR65, GPX8, HLA-DMA, HLA-DMB, HLA-DOA, HLA-DPA1, HLA-DPB1, HLA-DQA1, HLA-DQA2, HLA-DRA, HLA-DRB1, HMOX1, IL2RB, ITGA2, ITGAL, KCNK5, LGR6, LPAR1, MAOB, MOXD1, MRC2, OSCAR, PDCD1LG2, PDE6B, PDPN, PLLP, PLP2, PMP22, S1PR3, SDC4…	68
UP_SEQ_FEATURE|||disulfide bond	no		ADAM12, ANG, C1RL, CD3E, CD58, CD7, CD74, CHI3L1, CLIC1, CTSW, CTSZ, CXCL10, CXCL11, CXCL9, DPP4, EMILIN2, EMILIN3, FABP5, FCGBP, FCGR2A, FCGR2C, FCGR3A, FGFBP2, FGFRL1, FSTL1, GALNT3, GDF15, GNLY, GPR1, GPR37, GPR65, GSN, GZMA, GZMK, HAMP, HLA-DMA, HLA-DOA, HLA-DPA1, HLA-DPB1, HLA-DQA1, HLA-DQA2, HLA-DRA, HLA-DRB1, IFI30, IGFBP2, IL2RB, ITGA2, ITGAL, KCNK5, LGR6, LTF, LUM, MMP9, MOXD1, MRC2, NPC…	74
UP_KEYWORDS|||Signal	no		ADAM12, ANG, APOL1, BCO2, C1RL, CCDC152, CD109, CD3E, CD58, CD7, CHI3L1, CHST6, CLCF1, COL21A1, COL5A1, CTSW, CTSZ, CXCL10, CXCL11, CXCL9, EMILIN2, EMILIN3, EVC2, FCGBP, FCGR2A, FCGR2C, FCGR3A, FGFBP2, FGFRL1, FKBP9, FSTL1, GDF15, GNLY, GPR37, GSN, GZMA, GZMK, HAMP, HLA-DMA, HLA-DMB, HLA-DOA, HLA-DPA1, HLA-DPB1, HLA-DQA1, HLA-DQA2, HLA-DRA, HLA-DRB1, IFI30, IGFBP2, IL2RB, IQGAP1, ITGA2, ITGAL, LG…	87
KEGG_PATHWAY|||hsa04514:Cell adhesion molecules (CAMs)	no		CD58, HLA-DMA, HLA-DMB, HLA-DOA, HLA-DPA1, HLA-DPB1, HLA-DQA1, HLA-DQA2, HLA-DRA, HLA-DRB1, ITGAL, PDCD1LG2, SDC4	13
