# Supplementary material for: Transmembrane Protein TMEM230, a Target of Glioblastoma Therapy
Source: Front Cell Neurosci. 2021 Nov 17;15:703431. doi: 10.3389/fncel.2021.703431 (PMC8636015; doi:10.3389/fncel.2021.703431)
Supplement: Supplementary Table 11 — All pathways identified common between high or low TMEM230 expression in all LGG of patients from DEG. [file Table_11.XLSX]

## Sheet: Sheet1
	Pathways Modulated Differentially with TMEM230 gene High or Low in LGG and Glioblastoama with Benjamini score of P < or = to 0.05
	All Pathways in common in all LGG with TMEM230 low and high	Glioblastoma Patient Pathways correlated with TMEM230 High or Low
	GOTERM_CC_DIRECT|||GO:0009897~external side of plasma membrane	hsa00190:Oxidative phosphorylation
	UP_KEYWORDS|||Cell adhesion	hsa03010:Ribosome
	UP_KEYWORDS|||Membrane	Ribosomal protein
	UP_KEYWORDS|||Transmembrane	hsa05010:Alzheimer's disease
	GOTERM_CC_DIRECT|||GO:0030666~endocytic vesicle membrane	hsa05016:Huntington's disease
	GOTERM_CC_DIRECT|||GO:0005576~extracellular region	hsa05012:Parkinson's disease
	GOTERM_CC_DIRECT|||GO:0009986~cell surface	GO:0005840~ribosome
	GOTERM_MF_DIRECT|||GO:0005102~receptor binding	Ribonucleoprotein
	GOTERM_CC_DIRECT|||GO:0005615~extracellular space	GO:0003735~structural constituent of ribosome
	UP_SEQ_FEATURE|||topological domain:Extracellular	Respiratory chain
	UP_KEYWORDS|||Extracellular matrix	Mitochondrion inner membrane
	GOTERM_CC_DIRECT|||GO:0005925~focal adhesion	GO:0006614~SRP-dependent cotranslational protein targeting to membrane
	GOTERM_CC_DIRECT|||GO:0031012~extracellular matrix	hsa04932:Non-alcoholic fatty liver disease (NAFLD)
	GOTERM_CC_DIRECT|||GO:0005886~plasma membrane	GO:0005743~mitochondrial inner membrane
	UP_KEYWORDS|||Basement membrane	Electron transport
	UP_KEYWORDS|||Cell membrane	GO:0019083~viral transcription
	GOTERM_BP_DIRECT|||GO:0030198~extracellular matrix organization	GO:0005747~mitochondrial respiratory chain complex I
	GOTERM_CC_DIRECT|||GO:0070062~extracellular exosome	GO:0000184~nuclear-transcribed mRNA catabolic process, nonsense-mediated decay
	GOTERM_BP_DIRECT|||GO:0060333~interferon-gamma-mediated signaling pathway	GO:0006412~translation
	GOTERM_MF_DIRECT|||GO:0008201~heparin binding	GO:0022627~cytosolic small ribosomal subunit
	KEGG_PATHWAY|||hsa05330:Allograft rejection	GO:0006120~mitochondrial electron transport, NADH to ubiquinone
	UP_KEYWORDS|||Calcium	GO:0006364~rRNA processing
	SMART|||SM00920:SM00920	GO:0006413~translational initiation
	GOTERM_BP_DIRECT|||GO:0042102~positive regulation of T cell proliferation	GO:0008137~NADH dehydrogenase (ubiquinone) activity
	GOTERM_BP_DIRECT|||GO:0006954~inflammatory response	GO:0005753~mitochondrial proton-transporting ATP synthase complex
	UP_KEYWORDS|||Polymorphism	GO:0070062~extracellular exosome
	UP_SEQ_FEATURE|||region of interest:Connecting peptide	Hydrogen ion transport
	KEGG_PATHWAY|||hsa05145:Toxoplasmosis	GO:0032981~mitochondrial respiratory chain complex I assembly
	KEGG_PATHWAY|||hsa05322:Systemic lupus erythematosus	Mitochondrion
	KEGG_PATHWAY|||hsa05320:Autoimmune thyroid disease	SM00129:KISc
	UP_SEQ_FEATURE|||glycosylation site:N-linked (GlcNAc...)	GO:0005871~kinesin complex
	KEGG_PATHWAY|||hsa05140:Leishmaniasis	GO:0042776~mitochondrial ATP synthesis coupled proton transport
	GOTERM_CC_DIRECT|||GO:0042613~MHC class II protein complex	Motor protein
	INTERPRO|||IPR001003:MHC class II, alpha chain, N-terminal	domain:Kinesin-motor
	INTERPRO|||IPR014745:MHC class II, alpha/beta chain, N-terminal	IPR001752:Kinesin, motor domain
	UP_KEYWORDS|||MHC II	IPR019821:Kinesin, motor region, conserved site
	UP_KEYWORDS|||Disulfide bond	GO:0031012~extracellular matrix
	KEGG_PATHWAY|||hsa05310:Asthma	GO:0000276~mitochondrial proton-transporting ATP synthase complex, coupling factor F(o)
	GOTERM_CC_DIRECT|||GO:0071556~integral component of lumenal side of endoplasmic reticulum membrane	GO:0022625~cytosolic large ribosomal subunit
	KEGG_PATHWAY|||hsa05164:Influenza A	CF(0)
	UP_KEYWORDS|||Secreted	Microtubule
	UP_KEYWORDS|||Lysosome	Phosphoprotein
	UP_SEQ_FEATURE|||topological domain:Cytoplasmic	GO:0003777~microtubule motor activity
	KEGG_PATHWAY|||hsa05321:Inflammatory bowel disease (IBD)	GO:0006754~ATP biosynthetic process
	UP_SEQ_FEATURE|||signal peptide	GO:0007018~microtubule-based movement
	KEGG_PATHWAY|||hsa05169:Epstein-Barr virus infection	GO:0015078~hydrogen ion transmembrane transporter activity
	KEGG_PATHWAY|||hsa05332:Graft-versus-host disease	GO:0008017~microtubule binding
	KEGG_PATHWAY|||hsa04940:Type I diabetes mellitus	Ubiquinone
	UP_KEYWORDS|||Zymogen	GO:0005739~mitochondrion
	KEGG_PATHWAY|||hsa05323:Rheumatoid arthritis	Acetylation
	UP_SEQ_FEATURE|||sequence variant	GO:0015935~small ribosomal subunit
	KEGG_PATHWAY|||hsa04145:Phagosome	GO:0008574~ATP-dependent microtubule motor activity, plus-end-directed
	KEGG_PATHWAY|||hsa04974:Protein digestion and absorption	GO:0046933~proton-transporting ATP synthase activity, rotational mechanism
	GOTERM_MF_DIRECT|||GO:0032395~MHC class II receptor activity	Transport
	UP_SEQ_FEATURE|||domain:Ig-like C1-type	GO:0015986~ATP synthesis coupled proton transport
	KEGG_PATHWAY|||hsa05150:Staphylococcus aureus infection	GO:0016887~ATPase activity
	UP_KEYWORDS|||Innate immunity	ATP synthesis
	GOTERM_BP_DIRECT|||GO:0001666~response to hypoxia	Cytoplasm
	KEGG_PATHWAY|||hsa04672:Intestinal immune network for IgA production	Ion transport
	KEGG_PATHWAY|||hsa05152:Tuberculosis	hsa04260:Cardiac muscle contraction
	GOTERM_BP_DIRECT|||GO:0002504~antigen processing and presentation of peptide or polysaccharide antigen via MHC class II	Cytoskeleton
	KEGG_PATHWAY|||hsa05166:HTLV-I infection	Ion channel
	GOTERM_BP_DIRECT|||GO:0031295~T cell costimulation	Mental retardation
	INTERPRO|||IPR011162:MHC classes I/II-like antigen recognition protein	Neurogenesis
	UP_KEYWORDS|||Immunity	GO:0004129~cytochrome-c oxidase activity
	GOTERM_BP_DIRECT|||GO:0019882~antigen processing and presentation	Meckel syndrome
	UP_KEYWORDS|||Glycoprotein	Voltage-gated channel
	GOTERM_CC_DIRECT|||GO:0030669~clathrin-coated endocytic vesicle membrane
	GOTERM_BP_DIRECT|||GO:0001525~angiogenesis
	INTERPRO|||IPR003006:Immunoglobulin/major histocompatibility complex, conserved site
	GOTERM_MF_DIRECT|||GO:0005509~calcium ion binding
	UP_KEYWORDS|||Inflammatory response
	GOTERM_BP_DIRECT|||GO:0006955~immune response
	KEGG_PATHWAY|||hsa04612:Antigen processing and presentation
	KEGG_PATHWAY|||hsa05416:Viral myocarditis
	UP_KEYWORDS|||Transmembrane helix
	UP_SEQ_FEATURE|||disulfide bond
	UP_KEYWORDS|||Signal
	KEGG_PATHWAY|||hsa04514:Cell adhesion molecules (CAMs)
