# Supplementary material for: Transmembrane Protein TMEM230, a Target of Glioblastoma Therapy
Source: Front Cell Neurosci. 2021 Nov 17;15:703431. doi: 10.3389/fncel.2021.703431 (PMC8636015; doi:10.3389/fncel.2021.703431)
Supplement: Supplementary Table 12 — All pathways identified different between high or low TMEM230 expression in LGG and glioblastomas from DEG. [file Table_12.XLSX]

## Sheet: all_genes
gene_name	baseMean	log2FoldChange	lfcSE	stat	pvalue	padj
A1BG	124.6040793529	0.374319248553842	0.164172526666786	2.28003586320859	0.0226055615469406	0.0445876198698262
A1CF	0.0153452056080372	0.00452635555479819	3.58413516627555	0.00126288639931561	0.998992362707782	NA
A2BP1	304.869868655733	-1.2298360838343	0.313127751904818	-3.92758571015492	8.58028472892185e-05	0.000328082070777714
A2LD1	52.1615548871413	1.43975607159505	0.172486979185599	8.3470420688732	6.9993791982652e-17	4.61761861474284e-15
A2M	17106.9830579143	0.799289676604429	0.140347365295511	5.69508144966933	1.23313038556785e-08	1.16863585756192e-07
A2ML1	190.208775772985	0.764907384482398	0.284251902239535	2.69094904363321	0.00712490766522737	0.0161397980916092
A4GALT	123.008156731446	0.744697423885363	0.16349269015472	4.55492794925954	5.24035369681532e-06	2.67821240762498e-05
A4GNT	0.540370601570424	1.2458451811427	0.446616264496075	2.78952040080406	0.0052786170734465	0.0124106123087079
AAA1	0.137202385373614	0.35435256110282	1.3318118045507	0.266068043466821	0.790186805788171	0.86391667113539
AAAS	730.431499379473	-0.222600317648961	0.0675163282358528	-3.29698494372144	0.000977287400421282	0.00280878305480797
AACS	422.595913050681	-0.263287902898044	0.107150166515663	-2.45718612914668	0.0140030114507814	0.0292682309841411
AACSL	0.642180143804204	-0.902665900485628	0.5206539174749	-1.73371575664586	0.0829685293891402	0.137493221885276
AADAC	0.0727433457411728	0.207912855803244	2.27747639072592	0.0912908940131641	0.927261453300758	0.959606544594022
AADACL2	0	NA	NA	NA	NA	NA
AADACL3	0.00504354394914944	0	3.58413516627555	0	1	NA
AADACL4	0	NA	NA	NA	NA	NA
AADAT	257.077496627592	-0.404943242701413	0.0882648738433503	-4.58781874452224	4.47901252541014e-06	2.32590849989147e-05
AAGAB	682.683344224754	0.38494330350448	0.0593843079102683	6.48223945096983	9.03710612498244e-11	1.36657966390372e-09
AAK1	1178.44349111755	-0.268108222527199	0.085226682692336	-3.14582492310602	0.0016561911480226	0.00446544788449438
AAMP	2649.3659973896	-0.145908255338428	0.0452957099190365	-3.22123785230943	0.00127638170754875	0.00355127527066132
AANAT	3.13267159585867	0.222268550881731	0.247945813804572	0.896440022403122	0.370017799977199	0.482515484526873
AARS	6089.57197002715	-0.182779410116383	0.0566871514594636	-3.22435341008599	0.00126257478527964	0.00351778043655613
AARS2	472.526494514664	0.00962201719691224	0.0534506076428512	0.180016984300816	0.857139234473002	0.914125722739422
AARSD1	587.635791584573	-0.221659070753185	0.0686480061743438	-3.22892219462635	0.00124257695938372	0.00346958597779633
AASDH	333.02872929878	0.0385605732760605	0.0797294857042398	0.483642568812029	0.628639558344726	0.730521042308924
AASDHPPT	1523.37810341712	-0.24599983278	0.0647826261893147	-3.79731182958087	0.000146273736293143	0.000523311957836228
AASS	1387.02354446555	0.033697030235175	0.110759640692389	0.304235640568402	0.760948373701057	0.84093008904465
AATF	1291.37374949531	-0.18783388537233	0.0702719665431075	-2.67295615324933	0.0075186077023523	0.0169353972002011
AATK	1514.37292623853	-0.0537241217716642	0.196386193261702	-0.273563639476793	0.784419979848597	0.859639973920466
ABAT	9100.74980470943	-0.414198523774556	0.120023381632159	-3.45098195153315	0.000558550920177513	0.00171787281888384
ABCA1	2779.39532946244	0.0246838448899214	0.137436753310398	0.179601484285455	0.857465439340304	0.914369520289125
ABCA10	5.5556253629242	0.282046930772065	0.242106510757747	1.16497044994499	0.244030954407757	0.342414726224094
ABCA11P	121.562857623358	0.229800265812103	0.096413391484963	2.38348908043489	0.0171493932395728	0.0348909796651793
ABCA12	8.52342853223447	0.391881934534341	0.318988389284386	1.22851472874446	0.219253803773295	0.313511353697356
ABCA13	28.6184805823761	3.00576644278671	0.317387929881188	9.47032372627372	2.78977745551879e-21	5.6814424355e-19
ABCA17P	49.2881652641036	-0.324596479803793	0.167605057303184	-1.93667473420342	0.0527851161103187	0.0928883192864591
ABCA2	7326.38373056025	0.232742005979124	0.16533548687362	1.40769540998194	0.159221281567522	0.239804656868897
ABCA3	4433.8734373714	-0.356120025774953	0.0810354260806419	-4.39462150073182	1.10965926043294e-05	5.25279835863354e-05
ABCA4	6.24621611175066	-0.352142085927958	0.225966008913382	-1.55838520856003	0.119141960842442	0.187378811243515
ABCA5	166.780813486884	1.16739304877901	0.256582296977526	4.5497801778634	5.37019865452763e-06	2.73785148275455e-05
ABCA6	52.8867593253744	0.643628122128107	0.322956414939215	1.99292564679122	0.0462695894834517	0.0830247303734509
ABCA7	199.795246289568	0.510359679962085	0.16176389949644	3.15496647614703	0.00160516548214135	0.00434663686564537
ABCA8	615.343536445656	0.903962392886787	0.206240198151387	4.3830562663795	1.17025872585839e-05	5.50627008731361e-05
ABCA9	59.0742512746499	0.163027331225265	0.204445716712608	0.797411331705398	0.425212180263049	0.539717865280705
ABCB1	671.525240633722	0.0251194198322445	0.136933703179414	0.183442200488308	0.854451066414573	0.912430846595113
ABCB10	283.683740260047	-0.0453307808804804	0.0581436619207147	-0.779634088790175	0.435606284924341	0.550486938779337
ABCB11	1.57388821834738	2.19679774569604	0.67526543421606	3.25323588974516	0.00114098736440484	0.00322193508055599
ABCB4	61.5163942256018	0.694371639958864	0.178427944128493	3.89160814103657	9.9581986350274e-05	0.000373155681733955
ABCB5	0.218678435790722	0.947640304897496	2.40773538103123	0.393581583907955	0.693889979956917	0.78739765395632
ABCB6	849.932937988617	-0.27794279095505	0.0759665396994504	-3.65875281478776	0.000253445644273349	0.000848806569128409
ABCB7	421.531491753068	-0.0301613565040387	0.0550885668325283	-0.547506646809866	0.584030705258271	0.690851650591513
ABCB8	850.465791428649	0.330036301639819	0.0837959532749887	3.93857088249544	8.19683795740798e-05	0.000314575903256854
ABCB9	207.881230049435	0.466508194901401	0.139915831111173	3.33420593793084	0.000855432977959789	0.00249881388759816
ABCC1	541.837893118184	0.448812105851723	0.118877598524135	3.77541363069009	0.000159742368003514	0.000565130854779804
ABCC10	432.022683957787	0.0456876579029125	0.0710296407966139	0.643219610721873	0.520081610133329	0.631349556009981
ABCC11	16.1295260467831	0.0473457860506339	0.168672713517159	0.280696178198482	0.778943440311019	0.854866699722778
ABCC12	4.75998415034508	-1.30796180842365	0.491666283538193	-2.66026337826365	0.007807956842835	0.0175092614491151
ABCC13	0.580009082294484	-0.132754602455448	0.578162682217814	-0.229614616332908	0.818391248122957	0.885620601405297
ABCC2	7.10195167833461	-0.549028830844142	0.198352588586139	-2.767943865808	0.00564111709948069	0.0131506743779856
ABCC3	405.226249006782	3.70333444256073	0.38975645914606	9.50166278366389	2.06565149708936e-21	4.39795982380299e-19
ABCC4	423.494808404647	0.296064534877865	0.110579544018831	2.67738972433679	0.00741982730118442	0.0167430909689258
ABCC5	1142.74562519338	-0.329009937970217	0.101853448126912	-3.23022876515936	0.00123691204660584	0.0034558282292286
ABCC6	50.3415122723634	0.312513882863012	0.16974068491873	1.84112537906065	0.0656031873168923	0.112188875280147
ABCC6P1	10.5876930817695	0.167838894240055	0.232598940646759	0.721580647673484	0.470552340784161	0.584788316326083
ABCC6P2	26.1494362391269	0.364806966609513	0.167301114025084	2.18054116815275	0.0292173706737752	0.0556827033815331
ABCC8	343.816532393407	-1.6936368054172	0.227919888889759	-7.43084253711785	1.07908108803969e-13	3.15408163268513e-12
ABCC9	424.447583320584	0.19631898837548	0.200583892830235	0.978737552678944	0.327709672100274	0.436951202367506
ABCD1	320.695747900658	0.352142391255928	0.104249325010655	3.37788653518799	0.000730452136733384	0.00217347339944649
ABCD2	162.67303860839	0.825015925948308	0.249609619695613	3.30522488257614	0.000949002219495302	0.00273925521251949
ABCD3	1723.4157796224	0.0462932384293754	0.064259776673393	0.72040770799229	0.471274005567623	0.585568656297831
ABCD4	892.117803661501	0.109513143871252	0.0841195803041161	1.30187458705014	0.192959261087441	0.281673916301855
ABCE1	1245.27959420453	-0.00128449886684918	0.0734333798206663	-0.0174920297824516	0.986044091187249	0.992826853637376
ABCF1	1847.05829978427	-0.140138596667813	0.0650360835590064	-2.15478222240531	0.0311788800407746	0.0589353809971705
ABCF2	1580.43326005953	0.161867848006937	0.0540564981026417	2.9944197957401	0.00274967336775959	0.00699211186459606
ABCF3	1220.07364729601	-0.0629764271592476	0.0650042999831145	-0.968804020281834	0.332642980346244	0.44239060759279
ABCG1	736.344352082124	-0.164426749938504	0.119756783080664	-1.37300573469606	0.169750563917988	0.252918215949695
ABCG2	1214.97995353707	0.0170552125435783	0.140813177562436	0.121119435260355	0.903596435392385	0.944496075026409
ABCG4	48.1060702042267	-0.871217895839851	0.259502759804385	-3.35725869157069	0.000787194233921995	0.00231864033434405
ABCG5	1.96926118515861	-0.090646399466307	0.234859110650004	-0.385960754153547	0.699525734651952	0.79163530831354
ABCG8	0.309105062123625	-0.616483219446878	0.956595689954602	-0.644455359689248	0.519280196048774	0.630908096308269
ABHD1	27.2088252021695	0.198502194539158	0.168953918422664	1.17488955800702	0.240038903718683	0.337817839711052
ABHD10	826.770391168722	-0.0893319324682263	0.0638589042881209	-1.39889547846257	0.161844328680923	0.243216807175262
ABHD11	315.269306025158	0.481230369114455	0.105649564604752	4.55496784028213	5.23935934076172e-06	2.67821240762498e-05
ABHD12	2118.72016303007	0.131430724908377	0.0792648249909154	1.6581216816342	0.0972929084652079	0.15766129847813
ABHD12B	14.292025186652	0.490539034158435	0.305114429134737	1.60772152123233	0.107896182958116	0.172463232562662
ABHD13	346.438553807158	-0.0196634918948112	0.0698250555935145	-0.281610830491591	0.778241934660603	0.854307330359912
ABHD14A	557.627363934299	-0.414919258857184	0.096797795116476	-4.28645361557993	1.81548088043888e-05	8.14531843292694e-05
ABHD14B	582.853058084133	0.530218126672465	0.102563047111419	5.16967993449398	2.34495259863997e-07	1.64957501562201e-06
ABHD15	215.109599929771	0.601792088969502	0.0866317014648996	6.94655742405485	3.74307612091592e-12	7.70662353862424e-11
ABHD2	4618.57556507878	0.14047374339056	0.152176814933012	0.92309556782613	0.355957404170062	0.467359350002122
ABHD3	344.216884399744	0.157815388433516	0.105137635365597	1.5010361216965	0.133346219060846	0.206272684967307
ABHD4	1791.52957041908	-0.0391024867496385	0.0809307606851249	-0.483159758027896	0.628982306221291	0.730761478732603
ABHD5	717.754486438561	0.0338439762179375	0.0635416159229165	0.532626936321453	0.594291852146651	0.699750357853442
ABHD6	977.40673197762	-0.50093707214757	0.104108535707531	-4.81168108592782	1.49666040438296e-06	8.71393080687354e-06
ABHD8	623.633163760085	-0.0732487902951883	0.124709196175465	-0.587356767115454	0.556964123060189	0.66581253172052
ABI1	2304.17713927621	-0.524276615264761	0.0904471660250269	-5.79649576991381	6.77148920128421e-09	6.80636382378009e-08
ABI2	4439.71425760554	-0.264045428965941	0.0740132284972848	-3.56754372599254	0.000360343261790327	0.00116423372183197
ABI3	428.640265642006	0.780037204778987	0.164681393732802	4.73664442046568	2.17285914824866e-06	1.21888290423913e-05
ABI3BP	804.060739330792	0.0716256071383901	0.234153451721588	0.305891741555679	0.759687074057301	0.839734337435846
ABL1	3206.39259386938	-0.238580670322863	0.0698968366400596	-3.41332572104024	0.000641751901360182	0.00193496356998461
ABL2	1020.31603603129	-0.389392900672537	0.0644213792803384	-6.04446699251876	1.49904737800157e-09	1.76642463359984e-08
ABLIM1	6130.42424297194	-0.352260587279231	0.106806328316657	-3.29812467885663	0.000973329053508307	0.0027991240439803
ABLIM2	239.594044380925	-0.365530874245331	0.179282428248868	-2.03885499441097	0.0414645017597098	0.0754806145062572
ABLIM3	1465.82876161259	-0.455384370657729	0.164819199376314	-2.76293279169497	0.0057284560552914	0.0133294029622379
ABO	3.2740387450075	-0.108870587625281	0.293847829168996	-0.37049988741849	0.711010060422252	0.801123458761022
ABP1	0.872399855231772	1.37714847523742	0.548082295002779	2.51266732714006	0.0119822267034057	0.0254927758096173
ABR	7013.41019681585	-0.132511002435876	0.0895260613189518	-1.48013886106061	0.138836192538831	0.213303395113369
ABRA	0.299359767341934	-0.158183675795517	0.803598997122744	-0.196844043312507	0.843949583758731	0.905056344874569
ABT1	411.987659833205	-0.00550646600677536	0.0558549084004129	-0.098585176566768	0.921467640066016	0.955535626758738
ABTB1	440.808457976498	0.0926926662834427	0.130946198078289	0.707868327937436	0.479027029710922	0.592770836272492
ABTB2	255.259084911392	-0.0757652184868388	0.158515516007185	-0.477967207219038	0.632673545371392	0.73429793384615
ACAA1	1714.20720372528	0.101496099656586	0.0826713672654586	1.22770558917552	0.219557507548431	0.313873757166749
ACAA2	703.690586183485	1.01132979744037	0.137350530977931	7.36312987099308	1.79647437788403e-13	4.95710514639694e-12
ACACA	2265.38726486648	-0.216514547496089	0.0777306665909587	-2.78544565474333	0.0053454199554422	0.0125503494091686
ACACB	420.838041553141	0.688989677183392	0.1776505601828	3.87834227189845	0.000105170680144202	0.000390890272402652
ACAD10	473.368349456786	0.138569985877807	0.0644826471388966	2.148950020295	0.0316383620642837	0.0596594556799939
ACAD11	737.661350156046	-0.211280258010029	0.105344160036099	-2.0056190864081	0.0448969039500225	0.0808368626184529
ACAD8	960.990478537603	-0.225093522984069	0.0543414563978964	-4.14220629892397	3.43980717098888e-05	0.000144567579981264
ACAD9	768.566053474527	0.115487233156998	0.047116068380538	2.45112202962805	0.0142411664120011	0.0296799214566467
ACADL	29.278177929799	1.19340340615927	0.292062928302636	4.08611737578233	4.38651932384951e-05	0.000179955826695083
ACADM	1221.33439278064	0.212741541722642	0.0631723118901245	3.36763900761876	0.000758147954852631	0.00224331334209079
ACADS	268.007257634361	0.608013873994179	0.153279860493428	3.96669120155056	7.28773151057711e-05	0.000282639075930807
ACADSB	664.483029480302	-0.494374486805012	0.0898710789899026	-5.50092969130322	3.77793850160686e-08	3.20867886519067e-07
ACADVL	4148.45464366516	0.116404073944651	0.0883964542706565	1.31684098536622	0.187891931426295	0.275220328919011
ACAN	150.437908866736	1.06751177948228	0.37826236444497	2.82214642487274	0.00477033914814235	0.0113595671428057
ACAP1	25.4173401050641	2.16973291399493	0.23985542128911	9.04600322283161	1.48297085983432e-19	1.93298594832343e-17
ACAP2	1076.02303344689	-0.0308062036228504	0.0835741469127655	-0.368609250119009	0.712418999785719	0.802349265447538
ACAP3	3173.69090131055	-0.701234036842657	0.138217545300815	-5.0734082660526	3.90752889041084e-07	2.61937249698524e-06
ACAT1	1577.16559697321	-0.169114558914497	0.0735129722922221	-2.30047233353928	0.021421474954482	0.0425116782911954
ACAT2	670.949481782129	0.154206860222926	0.114620269521546	1.34537164208935	0.178505248280483	0.26378341472069
ACBD3	878.231541292926	0.100170149369893	0.0614587589715786	1.62987588825567	0.103127730608758	0.165703519172044
ACBD4	338.154579620057	-0.200996472163037	0.111580185453697	-1.80136348891844	0.071645606942047	0.121161845984853
ACBD5	2112.48701383753	-0.548160193038904	0.0851046241687437	-6.44101537834211	1.18676845934524e-10	1.74257788826743e-09
ACBD6	480.692294404133	-0.162731827581518	0.0578058181414093	-2.81514617064031	0.00487550525787543	0.0115732252010077
ACBD7	905.39226614479	-0.832971946059768	0.237075663040479	-3.51352785594675	0.000442198045240085	0.00139572482742895
ACCN1	76.0639681638986	-0.723731729345925	0.337441083898192	-2.14476471265804	0.0319716639006969	0.0601728874779967
ACCN2	2402.39480921789	-1.11744968841842	0.130372291769913	-8.57122071912751	1.02393779697476e-17	8.37751029000835e-16
ACCN3	144.242580202512	-0.847895908148742	0.174025035340049	-4.87226396186006	1.10326628369648e-06	6.66369990049559e-06
ACCN4	1344.88078230918	-1.9707823787904	0.229072762329233	-8.60330298002827	7.74541561281853e-18	6.65679389549394e-16
ACCN5	0	NA	NA	NA	NA	NA
ACCS	104.516956934276	1.16535186618117	0.202735405868273	5.74814182648669	9.02295414452303e-09	8.80489941936372e-08
ACCSL	0.0249876789251004	-0.122928990376143	3.58413516627555	-0.0342980899640245	0.972639447962976	NA
ACD	543.076843762817	-0.209018275908338	0.0786172070125784	-2.65868356115597	0.00784466041466975	0.0175831507990492
ACE	221.878872193097	1.36438901563848	0.219208268577336	6.22416765796922	4.84119172715866e-10	6.32087583275572e-09
ACE2	3.49238947640469	0.617494173243348	0.280642597977618	2.20028669094844	0.0277865609511674	0.0533444143691741
ACER1	0.0695499571099083	0.039780208474368	1.69176882099637	0.0235139742384774	0.981240291736885	0.990377197849346
ACER2	22.4880229278292	0.173167471810662	0.157404874992843	1.10014046145989	0.271270926950978	0.374413051078806
ACER3	588.656736516075	0.0772790865396244	0.0885457179846918	0.872759161013126	0.382794363683805	0.495819923814709
ACHE	365.366438207778	0.0208012715768838	0.186013833502025	0.111826476479006	0.910960993994311	0.948809024629366
ACIN1	2959.83711849505	-0.211684414130573	0.0601955217457341	-3.51661399372412	0.000437088926004847	0.00138192678326473
ACLY	3707.02340341652	0.0791769790564627	0.0788889168004177	1.00365149209456	0.315546625771489	0.423716408140532
ACMSD	0.756655919006708	2.39233864617086	0.790582686028804	3.02604482547914	0.00247775567100003	0.00637419061538605
ACN9	209.89911714818	0.378185730986079	0.116369999980734	3.24985589970516	0.00115463499457962	0.00325556678080419
ACO1	1036.60703927577	-0.108964419044381	0.0620211466644805	-1.7568913976043	0.0789363221978269	0.131719890692776
ACO2	5998.02354776502	-0.170050663240773	0.0892738258564951	-1.90482105599601	0.0568033358579433	0.0991307098206433
ACOT1	363.630926483021	0.331354392741452	0.128466658202151	2.57930265625844	0.00990000062867947	0.0215356335514848
ACOT11	85.0571389727632	1.0987804651243	0.21058327691241	5.21779545477074	1.81065257202269e-07	1.30729813446694e-06
ACOT12	1.62979858289022	3.55835847076645	0.778607130694468	4.57015910911658	4.87354063841029e-06	2.51129420795531e-05
ACOT13	684.455371704113	0.208283672980709	0.0617927212248693	3.37068296802702	0.000749820944628008	0.00222148090109905
ACOT2	214.782677873188	0.214558784023966	0.123901862241064	1.73168328662018	0.0833299680217923	0.137945774947544
ACOT4	19.9157740247783	0.4393119673461	0.214125530228853	2.0516561797959	0.0402030882221164	0.0734944932119791
ACOT6	2.81610825383303	0.908449176035762	0.278300467503402	3.26427470347191	0.00109744704864977	0.00311211864741973
ACOT7	942.768087937761	-0.396968471349908	0.133622087385177	-2.97082974168495	0.00296996382377638	0.00748624272867943
ACOT8	512.891733734948	-0.0107735440999484	0.0661324929111498	-0.162908483042108	0.870590491557067	0.923111683634025
ACOT9	331.545461726541	0.416884437490119	0.10978314850839	3.79734452103329	0.000146254453234084	0.000523311957836228
ACOX1	2166.59926107542	-0.127860507233872	0.0672774152069991	-1.90049672450213	0.057367964419649	0.100041528422054
ACOX2	164.065353109117	0.496295086373673	0.166164213791215	2.98677479976083	0.0028193732400726	0.00714800771664413
ACOX3	427.359436416273	-0.108332254974824	0.061359775194553	-1.76552561725228	0.0774754687626825	0.129559120201501
ACOXL	1.26901968685859	-0.738059742072914	0.277377779091779	-2.66084667809206	0.00779444409472733	0.0174831443264469
ACP1	1133.85713638505	0.20884260840883	0.0481897544736121	4.33375539448305	1.46587043294974e-05	6.71523910527932e-05
ACP2	1071.942402155	0.231640476558285	0.0662219492312489	3.49794107916381	0.000468864703875282	0.00147195862798379
ACP5	75.121807592637	1.71159529090736	0.285806786987415	5.98864466777943	2.11596878060659e-09	2.39980575505115e-08
ACP6	198.280490719448	0.340525202112515	0.10982345191004	3.10066016128731	0.00193089758233132	0.00511846308751551
ACPL2	1203.98393678918	0.374955755293248	0.142491483910552	2.63142571754409	0.00850274524300714	0.0188822549431722
ACPP	14.1493547672757	1.4560535655051	0.272094285830878	5.35128314458656	8.73327495151619e-08	6.81777664548364e-07
ACPT	0.0954443191320454	0.191642697110458	1.48364368105367	0.129170298473791	0.897222897673627	0.940913926497989
ACR	2.98151151716957	-0.307784948900543	0.207725239926424	-1.48169259070087	0.138422109465916	0.212789353704743
ACRBP	26.1061047738255	0.626327368936201	0.157216316809494	3.9838572843247	6.78056026691889e-05	0.000265608566090304
ACRC	49.3213338956488	-0.364323513282807	0.135070680909461	-2.69728049662395	0.00699083567014759	0.0158763996504103
ACRV1	7.27596053804254	-0.475685614076839	0.304214342153032	-1.56365282027877	0.117899123180307	0.185735976785187
ACSBG1	1153.90005028583	0.11179289047666	0.185250257155267	0.603469556228258	0.546196362248835	0.656079948909743
ACSBG2	3.8716963021601	0.490716679123435	0.34613008539335	1.41772327755264	0.156271571307171	0.235988084146946
ACSF2	387.952796785125	0.462670770975652	0.134217004054232	3.4471844624747	0.000566461673890569	0.00173816343301895
ACSF3	406.884235236015	-0.103094961704996	0.0671179516940034	-1.53602663822363	0.124531847208279	0.194702584525825
ACSL1	1081.45168894477	0.69016063744611	0.161832253853718	4.26466678311206	2.00200752802087e-05	8.87171547894962e-05
ACSL3	2567.36694664434	0.225617209407588	0.119579975069469	1.88674741967891	0.0591943063177907	0.102824450507151
ACSL4	952.169676182913	-0.159563164925578	0.0935296132295661	-1.70601758540297	0.0880048054861614	0.144556352630469
ACSL5	226.34375160898	0.363088904569003	0.117286137429555	3.09575293829658	0.00196313857931716	0.00519510796922122
ACSL6	557.854299172851	-0.796166463510151	0.18023392294757	-4.4174062822888	9.98923592222994e-06	4.78421074230317e-05
ACSM1	0.805971455796605	-0.293945377597738	0.426681796711257	-0.688910049276499	0.490879875045899	0.604159846210337
ACSM2A	0.261941472903076	0.224184374879805	1.70756646079293	0.131288813658065	0.895546840602594	0.939629590946419
ACSM2B	0.0782365573157497	0.129269248382128	3.58413516627555	0.0360670684516785	0.971228880803106	0.985186956700809
ACSM3	1.98159422511259	1.17674215489949	0.265802916984192	4.4271228030559	9.54983688591404e-06	4.59137141120055e-05
ACSM4	0.00492739118930054	-0.0714045485683144	3.58413516627555	-0.0199223927825564	0.984105281831703	NA
ACSM5	296.756341936103	-0.297571031355287	0.204797862010504	-1.45299871997699	0.146224109402839	0.223153450661528
ACSS1	1720.91027530807	-0.177251450210701	0.132528588573958	-1.33745822028268	0.181073111202443	0.266943568454558
ACSS2	616.481787119946	0.218411082326372	0.0626134480422228	3.48824556314305	0.00048620132059422	0.00152077928925765
ACSS3	313.780657698724	1.92361009871754	0.239209600691354	8.04152547873496	8.87268927900166e-16	4.42124218966423e-14
ACTA1	7.57997191568469	-0.0318228358031676	0.225757960628903	-0.140959971974044	0.88790156427157	0.935169993753302
ACTA2	726.151000833327	0.754978550502965	0.212172741032184	3.55832020093686	0.000373234148215027	0.00120091275991014
ACTB	85920.0331865164	0.437757023429004	0.071423017596104	6.12907488597741	8.83915177750191e-10	1.08811003747225e-08
ACTBL2	0	NA	NA	NA	NA	NA
ACTC1	49.5464728343125	-0.822083511232399	0.398535605908952	-2.06276051385032	0.0391353873176572	0.0718088940146534
ACTG1	47661.6564346723	0.194835484874043	0.0682025239488485	2.85671956979434	0.004280438326939	0.0103374958099419
ACTG2	27.3055081849428	1.12236776946072	0.362142098432978	3.09924688214186	0.00194013277396118	0.00514076193649223
ACTL6A	581.000699832196	0.447349858594088	0.07895708082247	5.66573452227706	1.4639603880592e-08	1.3646150164516e-07
ACTL6B	260.946726036237	-1.28965862191191	0.263572164064722	-4.89300008780602	9.93103621832227e-07	6.08263794006166e-06
ACTL7A	0	NA	NA	NA	NA	NA
ACTL7B	0.0293751244136099	-0.0605570759851185	3.58413516627555	-0.0168958683687274	0.98651968886185	NA
ACTL8	1.04663122704722	0.144946487782334	0.465468408345381	0.311399195269945	0.755497165595535	0.836484747346528
ACTL9	0	NA	NA	NA	NA	NA
ACTN1	2646.6841417788	1.3234258631164	0.214185485814909	6.17887742524279	6.45589933380615e-10	8.17247270184958e-09
ACTN2	774.317926707491	-0.282402436652594	0.139389453392429	-2.0259957247808	0.0427652227519702	0.0775352441920759
ACTN3	0.647234466665845	0.814319629790643	0.451014818266663	1.80552743903234	0.0709921857362736	0.120197866614388
ACTN4	4796.42144687105	0.449311526475256	0.082624129503916	5.43801827835247	5.38764486187693e-08	4.40991324299371e-07
ACTR10	1013.39110765803	-0.115098731632572	0.0589600685874888	-1.95214718011702	0.0509207331274881	0.0900727771786837
ACTR1A	3661.98523520626	-0.217112329986561	0.0694849563167192	-3.12459475396289	0.00178050166601462	0.00475952050427306
ACTR1B	1389.37721177343	-0.14329207971668	0.0549512104594303	-2.60762371781547	0.00911731166755137	0.0200565869911051
ACTR2	4719.30158040631	0.184658084365986	0.0636927897421741	2.89919918900514	0.00374117138545104	0.00918189508485862
ACTR3	2482.46522673854	0.371241251816055	0.0700868751199073	5.29687264813734	1.17802792629614e-07	8.90699403837147e-07
ACTR3B	359.640778145099	-0.281060359398349	0.116761869270744	-2.40712452749993	0.016078686269091	0.0329920343815234
ACTR3C	6.63415337127163	0.0781922748129621	0.221089954732556	0.353667243306229	0.72358827402506	0.811173930600941
ACTR5	192.727542074696	-0.110224837006373	0.0636592400802685	-1.73148213625217	0.0833658082887028	0.137992913163454
ACTR6	666.702113415649	-0.181583298377775	0.0501790168971665	-3.61870976368269	0.00029607546227879	0.000977148117184323
ACTR8	537.704411050654	-0.145562956093789	0.0587014548824467	-2.47971632705336	0.0131486943381262	0.0276798199669397
ACTRT1	0.0105610057533173	0.0180851113088444	3.58413516627555	0.00504587870430053	0.99597398837047	NA
ACTRT2	0	NA	NA	NA	NA	NA
ACVR1	671.307975378335	0.20362912274151	0.0851737720908115	2.39074914428355	0.0168140367748814	0.034305542090186
ACVR1B	1043.55674872331	-0.260723295994078	0.0764004016210345	-3.41259064693575	0.000643485220972352	0.00193862986012831
ACVR1C	75.1716006309914	-0.626049998177534	0.280918312831164	-2.22858378960079	0.0258416106165578	0.0501053934090682
ACVR2A	320.785177987404	-0.362051750561621	0.0726307918154224	-4.98482450090463	6.20180790513263e-07	3.97119182879579e-06
ACVR2B	633.35522387329	-0.791417004048256	0.111808636244276	-7.07831729848841	1.45915330696716e-12	3.27802114620344e-11
ACVRL1	324.796867841859	0.390649916389924	0.138106530358262	2.82861292204314	0.00467502049624905	0.0111600205007919
ACY1	413.787770126767	0.0276485701187536	0.0891556817699613	0.310115626619201	0.756473029356144	0.837317816389006
ACY3	184.776040569868	-0.295537384746928	0.271978874953931	-1.08661889566602	0.277205270723022	0.381163333628868
ACYP1	95.4786761544602	-0.155549624737826	0.133768832603714	-1.16282411762265	0.244900869872241	0.343396400084292
ACYP2	547.770319038018	0.133200511423813	0.0894603956684099	1.48893273306691	0.136505082942216	0.210446740229191
ADA	105.426572234425	0.142983676049992	0.158661327272908	0.901187948617435	0.367488397467012	0.479909570986404
ADAD1	0	NA	NA	NA	NA	NA
ADAD2	36.8562751714844	-1.48626028356902	0.366578000613626	-4.05441756210446	5.02593704707635e-05	0.000203426132024244
ADAL	239.392202072928	0.00269720681029785	0.064032313191426	0.0421225889846349	0.966400972744157	0.982315658527387
ADAM10	1070.66497420492	0.0957520132998418	0.113037737273557	0.847080060246759	0.396950498437246	0.510672217278359
ADAM11	241.178268657762	-1.18487151294867	0.244086212257131	-4.85431562066471	1.20803205688158e-06	7.21277521278947e-06
ADAM12	169.418037120708	2.32578123757213	0.315195808657103	7.37884570064925	1.59667742325469e-13	4.45168872055056e-12
ADAM15	1279.44380035637	0.193062595375226	0.0832833689485978	2.31814103839128	0.0204416572017827	0.0408092583199362
ADAM17	815.300046911452	0.238074159997279	0.0996912977046808	2.38811376197083	0.0169350987028724	0.034496195835727
ADAM18	0	NA	NA	NA	NA	NA
ADAM19	264.532422412069	0.995726574316672	0.213588878112497	4.66188400405485	3.13327781957989e-06	1.68984148611539e-05
ADAM2	0	NA	NA	NA	NA	NA
ADAM20	1.86076710916541	-0.417406479342093	0.233045336925859	-1.79109560761084	0.0732779539090088	0.123487654653642
ADAM21	7.47573333037976	0.197267706339502	0.145963767545927	1.35148406797209	0.176540420082872	0.261516548914666
ADAM21P1	1.35469683223999	0.344352198036387	0.266667983681131	1.29131436508759	0.196594691427669	0.286000321343955
ADAM22	501.880753512494	-0.735338567004983	0.174249727322345	-4.22002707438776	2.44272980608662e-05	0.000106490759730751
ADAM23	451.579638855194	0.0554295710282063	0.166242123112388	0.33342675123761	0.738812172760934	0.822385032607465
ADAM28	302.866103751354	0.449116783624336	0.165744760532095	2.7096891761919	0.00673462873370779	0.0153615782754747
ADAM29	3.51764183061557	-2.40400557770702	0.355807740508397	-6.75647352211069	1.41390804905041e-11	2.54395533918132e-10
ADAM30	0.0365100868978922	-0.12292922436364	3.58413516627555	-0.0342981552482525	0.972639395904328	NA
ADAM32	8.14431178142047	0.464031129068508	0.253738837251971	1.82877455455394	0.0674333883667956	0.114886967460932
ADAM33	113.452428557093	2.11412110106134	0.28047339218133	7.53768863641271	4.78374367771526e-14	1.54798310096154e-12
ADAM3A	0	NA	NA	NA	NA	NA
ADAM5P	0.0248278396287009	0.0940157814468235	3.58413516627555	0.0262310926026041	0.979073016099308	NA
ADAM6	333.278125892423	3.79223180036164	0.411497724809758	9.21568108818789	3.09308346165691e-20	5.0393053684873e-18
ADAM7	0	NA	NA	NA	NA	NA
ADAM8	68.0438142673586	-0.16136732654562	0.214760006089367	-0.751384438303988	0.452421325364099	0.566426057602524
ADAM9	2560.47513465963	0.601796876807255	0.121529185691689	4.95187121827648	7.35032430976479e-07	4.64314485056484e-06
ADAMDEC1	25.9246234233684	3.56628804311746	0.609725549219372	5.84900542167431	4.94520972207369e-09	5.12463768544097e-08
ADAMTS1	393.927653784295	0.529602749753966	0.185990780611612	2.84746775088755	0.0044068558897307	0.010612705906169
ADAMTS10	384.23254989819	-0.191483637154882	0.115932475811065	-1.65168246270305	0.0985992995857386	0.159516145154857
ADAMTS12	35.4285123476647	-0.04578841151594	0.225605063722577	-0.202958261487629	0.839167655703891	0.901062822927853
ADAMTS13	254.236304452119	-0.503676934434542	0.13360227962365	-3.7699726071544	0.000163265466151452	0.000576180405691016
ADAMTS14	96.4072818103862	1.92991744655898	0.295012240849313	6.54182159019206	6.07739792406804e-11	9.53652659173692e-10
ADAMTS15	101.665361524887	0.528619860063243	0.315532164006075	1.67532797085328	0.0938699003669345	0.152828158956803
ADAMTS16	26.4156933358249	0.372638781554622	0.356648271941398	1.04483551686983	0.296098996641254	0.401978900157274
ADAMTS17	72.0360211631562	-0.472652874410063	0.18051534520876	-2.61835288220764	0.00883553814743167	0.019528446706415
ADAMTS18	26.854143754298	2.13033894606248	0.465501387040813	4.5764395238541	4.72956348424641e-06	2.44652405965877e-05
ADAMTS19	28.0638429984407	-1.90535593614975	0.295876594735356	-6.43969807025112	1.19711399889322e-10	1.75364565154522e-09
ADAMTS2	27.2600615207974	0.720575065017211	0.249762283482544	2.88504355009059	0.00391359519555772	0.00953388630658816
ADAMTS20	42.2299118208662	-2.26591348623372	0.456870311590983	-4.95964265732875	7.0622969357131e-07	4.48387649568013e-06
ADAMTS3	67.6990684410187	2.10961085583336	0.328795845298001	6.41617248515211	1.39743112295701e-10	2.01867922280051e-09
ADAMTS4	502.601221425642	0.444496061724062	0.23772203817608	1.86981428030171	0.0615096126050703	0.106153255182804
ADAMTS5	136.224424246688	-0.467222077068506	0.163740610823541	-2.85342820402703	0.00432502996303512	0.0104330837372764
ADAMTS6	171.641669910374	-0.334523576357217	0.16642976111262	-2.00999853704561	0.0444313436959232	0.0801218147725522
ADAMTS7	97.4373342625703	0.651238543940779	0.244313736758003	2.66558300234195	0.00768549569874587	0.0172718540736119
ADAMTS8	164.41594153297	-0.0807759341913029	0.213462925670433	-0.378407322665546	0.705128029227479	0.796291890519321
ADAMTS9	507.198055220616	0.560148364584435	0.185574330187665	3.0184582319008	0.00254064421196284	0.00651807612698011
ADAMTSL1	109.099223695833	1.7155122905214	0.267652396024109	6.40947854756687	1.4601819160329e-10	2.10284153564891e-09
ADAMTSL2	498.351179270991	-0.0518401205240586	0.12117123765586	-0.427825295234587	0.668778319227684	0.765859702282861
ADAMTSL3	116.585985995244	-0.388587726824977	0.257649275374663	-1.50820422941189	0.131502265170338	0.203836793234631
ADAMTSL4	102.263197302499	1.80168489080839	0.197462711556825	9.12417780857786	7.22828244459284e-20	1.02597802940827e-17
ADAMTSL5	7.11327151484105	0.0715809579367302	0.28149397244988	0.254289487315666	0.799271920842637	0.870600484241649
ADAP1	706.569316293069	0.0402916370892186	0.196368777448447	0.205183520581812	0.837428744206949	0.899929429377639
ADAP2	378.673380725562	0.800236581952606	0.138033460565095	5.79741012560663	6.73468513785958e-09	6.7730037972591e-08
ADAR	6955.25521589308	0.124922438525174	0.0659590032026253	1.89394066707487	0.0582328857992811	0.101379980332218
ADARB1	406.86382252015	-0.17337277622687	0.135013804568394	-1.28411147868249	0.19910295226854	0.288998521359108
ADARB2	181.723359696586	-0.0899021474996807	0.268808162152043	-0.334447238431809	0.738042098398974	0.821771959089747
ADAT1	208.304386921284	0.296269243138792	0.115011387564386	2.57599920679971	0.00999508756035414	0.021717263195036
ADAT2	107.706395268366	-0.109596664808949	0.117233729554259	-0.934856079608257	0.349862474172236	0.461264043071635
ADAT3	35.9552285821193	0.215246973209613	0.187903821077489	1.14551674348787	0.251995163610959	0.351614707981284
ADC	574.259588088762	0.0993147022009616	0.100809569609322	0.985171373966241	0.324539899172266	0.433335737238833
ADCK1	303.199560276342	-0.248421967825851	0.0784749703892834	-3.16562040856502	0.00154752597759302	0.00420880341358439
ADCK2	793.311060710722	0.287717699437506	0.081076833925999	3.54870417979214	0.000387131730065936	0.00124072871955446
ADCK4	904.681417136514	0.201244317256232	0.081709708798519	2.46291805729554	0.0137811407759745	0.0288527716592534
ADCK5	116.9169025376	-0.181305878039826	0.121364709977176	-1.49389289583375	0.135203615581445	0.20873227929581
ADCY1	1055.66065194094	-0.424796186723249	0.247493585448615	-1.71639271358589	0.08609018928611	0.141825884679905
ADCY10	1.4678588365015	0.541343218290052	0.294758004372945	1.83656833829392	0.066273644981189	0.113180476927131
ADCY2	3986.2318867286	-0.606594204803485	0.161567304117486	-3.75443663008941	0.000173731790007859	0.000609101575147314
ADCY3	921.861767606949	0.141609819192222	0.0802259634228536	1.76513703482534	0.0775407377260167	0.129633555994883
ADCY4	83.0017196866649	0.178462126765947	0.166795697100296	1.06994442823448	0.284644323411471	0.389532981041365
ADCY5	389.051423218712	-0.503331357089644	0.147089225094841	-3.421945807146	0.000621747047071807	0.00188313169640113
ADCY6	971.939842879579	-0.154573503970643	0.0811747116805003	-1.90420761306843	0.0568831506215999	0.0992515095964142
ADCY7	888.854953641964	0.0943223991458816	0.107015727793325	0.881388194901992	0.378107744978753	0.490767350877861
ADCY8	1458.63112516575	-0.542003385140667	0.189797151692647	-2.85569820361884	0.00429423104469545	0.0103641263497892
ADCY9	587.938074338075	0.0357245463732523	0.0918799219651978	0.388817770075861	0.697410954554176	0.790090726097117
ADCYAP1	34.0606530119874	-0.0747330183434452	0.357429924870859	-0.209084391494211	0.834382359207034	0.897416066710849
ADCYAP1R1	1909.16316645976	-0.894934278136854	0.235590727804478	-3.79868208938842	0.000145467537651436	0.0005208254892867
ADD1	9791.16659418948	-0.24964680863798	0.0473015367159754	-5.27777374627378	1.30762775895513e-07	9.7803248270592e-07
ADD2	961.296312128243	-0.485951287452493	0.132869733365333	-3.65735126536561	0.000254835042788416	0.000852356978588179
ADD3	6137.87221633902	-0.267773674181139	0.12578184033174	-2.12887387777842	0.0332646965324546	0.0623372028637797
ADH1A	0.086108849471294	0.0126619714744956	1.79896060279322	0.00703849292465634	0.994384141532764	0.99698073231453
ADH1B	20.4757337245368	-0.2526778959853	0.309543832788046	-0.816291165323639	0.414333626095735	0.528696631115501
ADH1C	0.26283407731964	0.999799092722304	0.998798676273677	1.00100161971816	0.31682602532029	0.425157743188723
ADH4	0.580387856534769	2.87228924574742	0.926991184430661	3.09850761688907	0.00194497970403846	0.00515069112860278
ADH5	2446.43580185968	0.103165864779914	0.0562656922838902	1.83354830612209	0.0667210717088889	0.113840815912735
ADH6	0.135454352771884	0.0750339435362075	1.0969663240084	0.0684013190687823	0.945466171826422	0.970378208454661
ADH7	0.350140958210716	0.853053588148698	0.829088689475391	1.02890510867839	0.303524267522158	0.410305243599939
ADHFE1	503.694247033457	-0.825490326644527	0.147142819338293	-5.61012987488476	2.02174830636794e-08	1.82112866673604e-07
ADI1	1339.52374334273	-0.00768137820046394	0.0888084567550282	-0.0864937696378677	0.931073908621298	0.961789034771673
ADIG	3.44450869006273	2.37491087620903	0.403031629137992	5.89261661991273	3.80127639956157e-09	4.0489320421936e-08
ADIPOQ	0.317167674719688	0.883899333049089	0.996092173836644	0.887367009063606	0.37488133938292	0.487288523288358
ADIPOR1	1761.09356425076	0.373840409386308	0.0722861675718845	5.17167283788485	2.32007534250755e-07	1.63663146149177e-06
ADIPOR2	3324.01007591982	-0.29722988479144	0.113448939790293	-2.61994413822518	0.00879441715574184	0.0194467366729587
ADK	414.935818765682	-0.230847035520443	0.0883689240327466	-2.61231013104674	0.0089932631087799	0.0198277334572701
ADM	147.822590409899	1.40164613628132	0.272482162504504	5.14399226502817	2.68960612410267e-07	1.86915654084524e-06
ADM2	15.7975450063656	-0.0732399926225688	0.321972392119401	-0.227472896481784	0.820056042330854	0.886741502228365
ADNP	2299.46142432932	-0.0437818729997601	0.0720803435610765	-0.607403778016985	0.543582981849005	0.653737129977724
ADNP2	645.405559363896	-0.0797325959136256	0.0883051318379519	-0.902921429979203	0.366567596133091	0.4789073621888
ADO	1041.32018812444	-0.313792447081501	0.0703555282945523	-4.46009652244767	8.1922749322661e-06	4.00653780033771e-05
ADORA1	1406.55971690315	0.938425919375289	0.194729725130438	4.81912003289017	1.44192786554521e-06	8.43194771811954e-06
ADORA2A	117.644830881053	-0.262528358006323	0.126241923415064	-2.07956557460845	0.037565397308791	0.0693034537987258
ADORA2B	72.2836015641261	0.522288083846194	0.201934973354995	2.58641717761306	0.00969794740057302	0.0211501271676331
ADORA3	1103.5430810251	0.599289684215626	0.162089368759076	3.6972794008865	0.000217922449961147	0.000743038220650055
ADPGK	674.251141615496	0.403141558725362	0.0651987845812821	6.18326800590543	6.2787981921042e-10	7.97016008992306e-09
ADPRH	165.68167650594	1.03002779876246	0.125904891641502	8.18099904883228	2.8150012871777e-16	1.56969833680242e-14
ADPRHL1	48.3934146359317	-0.310009816474165	0.147265141084671	-2.10511336349396	0.035281441255531	0.0655526659424463
ADPRHL2	812.265598608774	0.218857930742211	0.0752834409615693	2.90711912137403	0.00364774260245482	0.00898200885787796
ADRA1A	51.9292071090918	-0.185375032608371	0.236923714645311	-0.782424979643296	0.433964858226797	0.548708704530791
ADRA1B	76.03809896117	-0.714872757326189	0.258825011313448	-2.76199256670928	0.00574497863739797	0.0133566842034708
ADRA1D	44.9243415099741	1.44439318117139	0.265398596967582	5.44235424631059	5.25809790953458e-08	4.3170781083716e-07
ADRA2A	132.176568062219	-0.128015538129471	0.270605912624199	-0.473069996468449	0.636163241670622	0.73743454160371
ADRA2B	21.604917184829	0.724759641551126	0.251004795113726	2.88743345011696	0.00388398760203957	0.00946791461251802
ADRA2C	41.6640522618209	-0.125981868598509	0.218098975556441	-0.577636223540657	0.563509745542249	0.672050833385078
ADRB1	76.9509234508173	-0.486743424516245	0.204341374424221	-2.38201111198237	0.0172183778759884	0.0350047230777472
ADRB2	116.380464004896	0.363908284851958	0.16296407734884	2.2330582958659	0.0255451003050931	0.0495715172777033
ADRB3	0.699055041645866	-1.34142836880438	0.725081398878451	-1.85003831415244	0.064308027577773	0.110255783738759
ADRBK1	1954.9300022095	-0.0985223166073954	0.0690309659866132	-1.42721915012027	0.153516736298032	0.232239771601125
ADRBK2	699.355602879597	-0.68292485215946	0.104525397395996	-6.53357814629671	6.42166621772475e-11	1.00431000213098e-09
ADRM1	1568.2586079973	0.176652733495081	0.0657577979344412	2.68641498109774	0.00722233259444215	0.0163387615901314
ADSL	646.47870823579	-0.0351710189494197	0.0664043589306733	-0.529649250678536	0.596355140326108	0.701578685617469
ADSS	703.53473567454	0.438535347341861	0.0836326069497289	5.2435929398382	1.57479426291488e-07	1.15120348458733e-06
ADSSL1	84.742179933665	0.814183486296742	0.148524767047845	5.481802816324	4.21013334267516e-08	3.53726718871578e-07
AEBP1	5118.74948970595	2.12374566222586	0.288888300985228	7.35144225288118	1.96079477040581e-13	5.32426823453959e-12
AEBP2	525.797943444891	0.168678863617407	0.0614101358301635	2.7467593311291	0.00601872822300315	0.01394077042727
AEN	420.443879346033	0.546819177881306	0.160038754469765	3.41679226193062	0.000633636103277864	0.00191326446914006
AES	6291.49166940591	0.0119926790502175	0.106242397181986	0.112880350672762	0.910125414643049	0.948324078979066
AFAP1	1828.14709886072	-0.547276478189131	0.11517345096814	-4.75175896518478	2.01654674750611e-06	1.13698525011358e-05
AFAP1L1	224.901567016194	1.01731439117542	0.192553110966851	5.28329241769847	1.2688261875487e-07	9.50528886441918e-07
AFAP1L2	809.80643085404	-0.0795204224726011	0.192135431066718	-0.413876930616656	0.678964239657486	0.77458892980714
AFARP1	3.39556276306359	-0.167527206379855	0.200815148698897	-0.834235900355531	0.40414806460212	0.518176838321037
AFF1	1135.93576901186	0.270299623193706	0.0949307325322718	2.84733527260856	0.00440869040386205	0.0106157593377149
AFF2	251.971417647903	-1.42472493897686	0.251758969132282	-5.65908314562674	1.52183817106388e-08	1.41785976991809e-07
AFF3	561.120327873799	-0.601921905021057	0.145790309871929	-4.12868252732174	3.64847748515672e-05	0.000152414435143581
AFF4	2754.47987011349	-0.277675441343751	0.0795790403167749	-3.48930371915051	0.000484280566287812	0.00151527733633408
AFG3L1	285.873204166408	-0.0719150763448677	0.118475529298441	-0.607003629953937	0.543848503161448	0.65397250210082
AFG3L2	1115.01174441751	0.0398856511863087	0.0609561695667006	0.654333293411167	0.512897100642827	0.624610989772116
AFM	0.0958818984388176	0.663498030340433	3.58413516627555	0.18512081703378	0.853134274163804	0.911515305367623
AFMID	310.452985264641	0.330417728639925	0.131251608276619	2.517437561173	0.0118211919913842	0.0252113663233438
AFP	2.49500888656854	4.25552259077808	0.779119228668817	5.46196581240712	4.70890778217069e-08	3.91420125140861e-07
AFTPH	785.422767949258	-0.0367782233370805	0.0487112068391085	-0.755025911358711	0.450233435218228	0.564279338014862
AG2	860.757107783228	-0.659535133298772	0.199244531500151	-3.31017934762376	0.000932362099404655	0.00269787433118851
AGA	365.658488546249	0.848135439933182	0.101404750962085	8.36386295401782	6.06974210436695e-17	4.12038724881954e-15
AGAP1	570.317887274959	0.0437619146597968	0.127363901675235	0.343597472158048	0.731149026022608	0.816345274589787
AGAP11	13.6283989126784	-0.153297906851835	0.22121362597597	-0.692985823886307	0.488318447912798	0.601718805662229
AGAP2	2088.22131665816	-0.351583376800916	0.241437244636144	-1.45621019379494	0.145334522404726	0.221976653768236
AGAP3	2841.09219691327	-0.405382922117871	0.0893171469365214	-4.53869090115452	5.66045374140463e-06	2.86943347670339e-05
AGAP4	306.653152560567	-0.626423449043749	0.141687607103308	-4.42115906853453	9.81728674374203e-06	4.7102864130794e-05
AGAP5	39.7838664682097	-0.500868975892168	0.118700293570609	-4.21961025390579	2.44725020301545e-05	0.000106656617361474
AGAP6	162.712208071679	-0.551899979741874	0.133468153016668	-4.13506868318579	3.5484849118501e-05	0.000148601728449762
AGAP7	16.8742299121177	-0.336756512270651	0.220083017679041	-1.53013401861729	0.125983559293017	0.19663678498117
AGAP8	50.3659571483656	-0.783349309814448	0.190705065887126	-4.10764814332774	3.99708401639529e-05	0.00016557454373465
AGBL1	0.314697005094098	-0.459196867410341	0.770150472632852	-0.596243050842417	0.551012869516551	0.660425865101209
AGBL2	15.3252564146224	2.26151251165869	0.29404699849584	7.69098995475952	1.46000898242618e-14	5.50396947580218e-13
AGBL3	15.2849031604879	0.484716304877642	0.149066659534207	3.25167483052381	0.00114727192887533	0.00323724199689883
AGBL4	31.0605315272523	0.111020777314713	0.244106841576667	0.454804038254882	0.649250224778103	0.7490825919972
AGBL5	566.757051181783	0.0595961114922822	0.0616349961322937	0.966920016744461	0.333584019292873	0.443363685308897
AGER	112.685109855713	-0.3821603444717	0.182917529289972	-2.0892494336389	0.0366852756418064	0.0678581621507438
AGFG1	1876.332434838	0.0015691219524922	0.0558800972931956	0.0280801578468846	0.977598219577374	0.988786452278217
AGFG2	1172.01131901911	0.27579460303778	0.134781557570656	2.04623398044054	0.0407333556136868	0.0743333155525504
AGGF1	1113.59210061224	0.124072227236818	0.0540087711686228	2.29726069584971	0.021603902508942	0.0428419472277241
AGK	716.60984633337	0.120597913369088	0.0661932478035164	1.8219065746262	0.0684691625626722	0.116441701894729
AGL	635.041168368094	0.189738246645053	0.0860702860584976	2.20445702383396	0.0274922191506831	0.052846436647912
AGMAT	26.4486387180795	0.403548825026351	0.163493547522149	2.46828594242645	0.0135761822976068	0.0284554593945587
AGPAT1	2955.18006613326	-0.133542525185514	0.048899474290128	-2.73096034516007	0.00631500696082205	0.0145371630934958
AGPAT2	247.677887494519	0.503194965626812	0.129596017975778	3.88279650475726	0.000103261982767142	0.000385018210771178
AGPAT3	3481.73715117186	0.00053815023355635	0.0774940466750978	0.00694440743058114	0.994459209061168	0.99698073231453
AGPAT4	1048.08929126934	-0.113336932948734	0.0927932028360833	-1.22139261804488	0.22193740083627	0.316696050424094
AGPAT5	2674.6566392826	-0.0567417027209081	0.074353453540848	-0.763134730382571	0.445383049374047	0.559633613645775
AGPAT6	2036.95813691706	0.0145431342583043	0.0593750042890275	0.244936980341268	0.806505227468518	0.876540515218409
AGPAT9	11.6686636155082	0.879165075371578	0.270292741448043	3.2526403434351	0.00114338117083164	0.00322723555539343
AGPHD1	17.09320342534	0.559179222917171	0.143369410229455	3.90026869764083	9.60859874401383e-05	0.000362081066105879
AGPS	962.047207862699	0.0161410917578317	0.056968060475454	0.283335813491254	0.77691942638852	0.853351921715255
AGR2	0.440824632910353	-0.78011243271754	1.04567529091065	-0.746036976773317	0.455645078432585	0.569700780080942
AGR3	4.56641065485738	6.01361676301847	1.01693025042151	5.91349973169337	3.34914073254176e-09	3.61668592304913e-08
AGRN	4711.15069460053	-0.0358196744543387	0.102936563684577	-0.34797814471541	0.727856596978479	0.81421683914552
AGRP	0.427412979507392	0.445754078949634	0.49246576021005	0.905147352294114	0.365387328910412	0.477698485413822
AGT	15351.0207349346	0.140849648297199	0.156969057673803	0.897308363727955	0.369554394769084	0.482069981229099
AGTPBP1	562.871217173743	0.162280074249087	0.101287449010191	1.60217357466235	0.109117231834887	0.174185946635293
AGTR1	6.3252098450282	1.56850251974119	0.348776553213993	4.49715585892274	6.88685047128472e-06	3.40993737922808e-05
AGTR2	0.0452378819084646	-0.0469985369662082	3.2228516627773	-0.0145829041742825	0.988364938296626	0.993775114517848
AGTRAP	619.99786570502	0.609440661380649	0.103892325890032	5.86607967585335	4.46219436660501e-09	4.65781792524996e-08
AGXT	0.154390860422101	0.967224075065254	2.64872501566086	0.365165907878864	0.714987565237674	0.804033792827145
AGXT2	0.029678216026887	0.0804570256927767	3.58413516627555	0.022448100297619	0.982090511515709	NA
AGXT2L1	2933.61050816389	-0.949168504981437	0.270603973271611	-3.50759263992305	0.00045218088251444	0.00142423997570674
AGXT2L2	428.737202173237	0.443650783407473	0.0890965883766177	4.97943626676399	6.37697480766577e-07	4.0736106374506e-06
AHCTF1	1206.6493749235	-0.208835610038861	0.084818706975674	-2.46214092958001	0.0138110386605725	0.0289024483798152
AHCY	2061.48060963466	0.189829721369717	0.0576410313040109	3.29330889949756	0.000990156255977326	0.00284010526821665
AHCYL1	17478.6025099886	-0.488025461023134	0.153712207322904	-3.17492975686659	0.0014987277668639	0.00409272167904999
AHCYL2	3052.01856401909	-0.196998340811861	0.131903512621472	-1.49350337149242	0.135305472386509	0.208837905151466
AHDC1	1672.55535981047	-0.137667645852951	0.0790570729244448	-1.74137038926954	0.0816186751066571	0.13553199475302
AHI1	340.734503271438	-0.0896514444057004	0.0971970251913719	-0.922368192125069	0.356336555233417	0.467758824273334
AHNAK	13558.338956808	-0.349512599411558	0.148215859658904	-2.35813225531942	0.0183671479342552	0.0370986291177453
AHNAK2	318.962705003799	1.26534587976946	0.259464713908755	4.87675514989079	1.0784516414785e-06	6.53700095591757e-06
AHR	480.674796712554	1.14506025043095	0.196125948501984	5.83839241659229	5.27068993376118e-09	5.43188375131735e-08
AHRR	57.1800111221675	-0.143535491868145	0.166414784538982	-0.862516466104742	0.388403375956737	0.501732325698113
AHSA1	1771.811760218	-0.162011208856432	0.061628194755777	-2.62884884910968	0.00856744318390506	0.018994156371275
AHSA2	629.713527470632	-0.168418963130137	0.152569872006945	-1.10388087054613	0.269644818015039	0.37258366376079
AHSG	2.54579805910769	-0.391185195985561	0.320466906330576	-1.22067267558054	0.222209977414011	0.317036714653434
AHSP	0.314726909448192	0.465537765226704	0.726973220635658	0.640378148757176	0.521926785355812	0.632963525456579
AICDA	0.0609526907458749	0.321809678153336	2.79728601722088	0.11504353726154	0.908410613367291	0.947449412828411
AIDA	943.794762307606	0.223158639796178	0.0645293935359456	3.45824790173905	0.000543700845201611	0.00167877044095211
AIF1	982.455188937466	0.762521162498328	0.167670866029523	4.54772603347839	5.42286647557225e-06	2.76019631313017e-05
AIF1L	3606.35890034277	0.348352559329829	0.131908119124947	2.64087276538193	0.00826927679721882	0.0184378400657732
AIFM1	578.852277027695	0.0468841559390559	0.0593437944052315	0.790043110807939	0.429502591718298	0.54431551396334
AIFM2	206.874500081039	-0.165244618529635	0.106945303606382	-1.5451320717909	0.122314320791861	0.191740387747348
AIFM3	376.351051740964	0.393154210069116	0.307359836776643	1.27913332526533	0.200850110049995	0.291151076355645
AIG1	739.500266340132	0.166463000678776	0.0827502422835981	2.01163158058536	0.0442587878134809	0.0798413872976486
AIM1	109.115146232749	1.67687020016305	0.272346282417636	6.15712535261126	7.4077215298972e-10	9.24657365650593e-09
AIM1L	0.0756278821608644	0.142829427599081	1.80324768193834	0.0792067717761054	0.936868158419124	0.965357885802004
AIM2	20.9140697665057	0.643809660808189	0.227472830778365	2.83027058046979	0.00465086527791676	0.0111117842192105
AIMP1	930.037241452369	0.0110893753070599	0.0532141345199577	0.208391537457043	0.834923263422213	0.897894745923464
AIMP2	510.402167141421	0.13832591279984	0.0702341551734928	1.96949635769301	0.0488961204271652	0.0869264363149603
AIP	1263.72734613819	-0.323033584475188	0.0911780890646769	-3.54288610113385	0.000395773597859683	0.00126604304754977
AIPL1	0.379033916907516	0.31909889071468	0.721482910565654	0.442281980684062	0.658285168612965	0.756803762602474
AIRE	8.18075179153747	-0.495184966940503	0.336139810914211	-1.47315179833573	0.140710108973072	0.215757803561624
AJAP1	110.562537815755	-1.42262287174907	0.221441377533594	-6.42437690550062	1.32410757052154e-10	1.92313794118539e-09
AK1	1828.48457336909	0.539127955416752	0.152661109641544	3.53153436839712	0.000413156168362578	0.00131513659028904
AK2	1453.64484926346	0.292683035199398	0.0689836938765794	4.2427857766365	2.20762148976656e-05	9.70255600100075e-05
AK3	1773.73004773449	0.0967367537267789	0.0877780365878806	1.10206103356993	0.270435138404271	0.373525451761329
AK3L1	222.037886241608	0.87418191992555	0.181573543387412	4.81447849514268	1.47584794937142e-06	8.60764790392396e-06
AK5	812.276816429509	-0.395153943286696	0.285604715395846	-1.38356939499061	0.166490344948125	0.249070900368817
AK7	15.6277398171095	2.84538650777112	0.390996594322711	7.27726673092878	3.40651322457495e-13	8.81552925077849e-12
AKAP1	1445.237507946	-0.398603208545797	0.0785890446345597	-5.07199458142427	3.93667600718908e-07	2.63513975243639e-06
AKAP10	459.196368854042	-0.0644814013507616	0.0833142942517873	-0.773953640606856	0.438958206865698	0.55390092698247
AKAP11	2556.86032257818	-0.467085268744279	0.094316704372786	-4.95230693068036	7.33388067420665e-07	4.63588354628663e-06
AKAP12	1872.15559712085	0.0924374026816226	0.193306452789343	0.478190983010573	0.632514279738543	0.734249538115324
AKAP13	2370.18371966331	-0.121343194344646	0.0712392875966997	-1.70331846988133	0.0885084859654718	0.145215797923849
AKAP14	3.43913019668375	3.17344952857692	0.679100306269937	4.67302031714222	2.96802393437352e-06	1.60776846576648e-05
AKAP2	308.374814778803	0.553528595885872	0.208016073466155	2.66098954115646	0.00779113771901237	0.0174799133401288
AKAP3	102.777593718097	-0.028305251283329	0.146921674492757	-0.192655381726706	0.847228868956347	0.90732666983516
AKAP4	0.0103396393485194	-0.0334390965067584	3.58413516627555	-0.00932975319162046	0.992556041964808	NA
AKAP5	140.200257347986	-0.893398262729146	0.223129996518842	-4.00393616576651	6.22971810322208e-05	0.000246296683650493
AKAP6	2542.63545934963	-0.67029511768272	0.112863653317279	-5.93898122186783	2.86798710633568e-09	3.14974246332388e-08
AKAP7	531.128530009154	-0.398095295876295	0.102263564259948	-3.89283611183705	9.9079088733156e-05	0.000371566414432428
AKAP8	609.346003633619	0.0200244801829807	0.0565399389588284	0.354165224648761	0.723215063414634	0.810804058648671
AKAP8L	1337.05945519384	-0.248355788039456	0.0753426729111492	-3.29634957777963	0.000979500518504424	0.00281384877563614
AKAP9	1268.08873878325	-0.384402824743126	0.094852820148176	-4.05262409849938	5.06463432828908e-05	0.000204815430120492
AKD1	195.490623013743	0.194587761916773	0.124325204436615	1.56515135284559	0.117547424967449	0.185322160399708
AKIRIN1	1812.20779522586	0.179691812729412	0.0606075706763088	2.96484103758432	0.00302839369129646	0.00762019664251014
AKIRIN2	1094.48254415931	-0.0450609902580647	0.0592749903522804	-0.760202405605809	0.447133607280448	0.561268609540834
AKNA	923.376668646241	-0.0371796224365399	0.109778510649547	-0.338678510179747	0.734851931294753	0.819528847368551
AKNAD1	21.1209863831986	0.653162403760139	0.281923359779121	2.31680838463288	0.0205141720969855	0.0409452997133398
AKR1A1	1564.66886359579	0.0931039789474189	0.0721472442989026	1.2904717269823	0.196886922201335	0.286336519006769
AKR1B1	2728.52527115488	0.219949206074509	0.0700376900439051	3.14044061042886	0.00168693907335716	0.00453790243767692
AKR1B10	3.66739489379018	1.43556546474182	0.609007722035202	2.35722046338657	0.0184123119978674	0.037172573352504
AKR1B15	1.48198283352521	-0.204724661936392	0.675938049825593	-0.30287488918432	0.761985208607338	0.841678744751037
AKR1C1	523.118214196419	0.321196295467088	0.290098946414543	1.10719566353787	0.268209342024547	0.370888643602621
AKR1C2	68.1045020442655	-0.0782801662983407	0.273335440724585	-0.286388644263722	0.774580471202112	0.8515749154115
AKR1C3	667.454692415491	-0.472324295224158	0.209620891404757	-2.25323102129237	0.0242445864085027	0.0473716311346028
AKR1C4	0.415249904271507	1.90949503135418	1.2239435012216	1.56011697390307	0.118732241071641	0.186828526809293
AKR1CL1	0	NA	NA	NA	NA	NA
AKR1D1	0.140017985372608	0.698754936312845	1.48435263331493	0.470747260879883	0.637821230334995	0.738807948782471
AKR1E2	4.36187972180426	-0.00637014915114859	0.294238200049746	-0.0216496333585225	0.982727441100528	0.991031882042063
AKR7A2	1049.78502167104	0.0837197400998535	0.0817993185604094	1.02347723151295	0.306082259752161	0.413196715809243
AKR7A3	28.8221636244478	0.397743443926871	0.197252503356113	2.01641772428509	0.0437563136577634	0.0790567302499378
AKR7L	22.7869609899697	-0.376983248718071	0.151327074610578	-2.49118176432203	0.0127318966847405	0.026902539335209
AKT1	3184.33030250762	-0.000435943542401123	0.0584576826751137	-0.00745742086329245	0.994049894180485	0.996923178319536
AKT1S1	1125.93047296751	0.0631618491465159	0.0802668411192443	0.786898403696773	0.431341342064768	0.545953803370146
AKT2	2320.32772609821	0.0287802869626917	0.0806847896564772	0.356700278766622	0.721316196821965	0.80923825611857
AKT3	1353.21670020354	-0.528699965293652	0.110092541266755	-4.80232320201062	1.56835276885347e-06	9.077744046104e-06
AKTIP	1187.58672693177	-0.0209035453096393	0.0617301842067523	-0.338627619182655	0.734890273518308	0.819528847368551
ALAD	2056.05475779969	0.344785640193652	0.104535742357368	3.2982560071651	0.000972873900099834	0.00279824461041917
ALAS1	955.706367313844	0.117188266040018	0.0579882474256043	2.0208968410429	0.0432904449930101	0.0783358873275098
ALAS2	2.68335438663858	1.45910207196038	0.515354575299351	2.83125859727322	0.00463652181117905	0.0110859970207058
ALB	12.0900938616554	-0.383363273302954	0.225632788198879	-1.69905835212677	0.0893081895626935	0.146367935588403
ALCAM	4351.13275079083	-0.588474632527886	0.118753735152855	-4.95541998548866	7.21742197221017e-07	4.56997695408346e-06
ALDH16A1	401.81730028633	0.468724558515066	0.106442638182899	4.40354134881235	1.06497974293893e-05	5.07205400704213e-05
ALDH18A1	1194.87477899012	-0.229021701340573	0.0963616060810194	-2.37669037134992	0.0174687446550979	0.0354521663624258
ALDH1A1	918.542011948897	0.511198403163207	0.222598711708573	2.29650207424592	0.0216471906971763	0.0429120545055547
ALDH1A2	66.8110495536535	0.207748808711945	0.237298594734835	0.875474247726119	0.381315916318185	0.494192981066035
ALDH1A3	113.89350643356	3.37010015727914	0.443897846720159	7.59206241296259	3.14853286796564e-14	1.08240205163677e-12
ALDH1B1	484.826102029807	-0.0685743349378025	0.0870737272475176	-0.787543350968216	0.430963861588196	0.545540092609718
ALDH1L1	2720.26061160844	0.645273828360132	0.216787874761509	2.97652176843381	0.00291538384397454	0.00735757431313403
ALDH1L2	378.719884852633	-0.479647544305377	0.148054006037178	-3.23967960843243	0.00119664075580321	0.00335783453657766
ALDH2	7426.59126380629	-0.62601016257319	0.125465304405559	-4.98950817948562	6.05332113143702e-07	3.88673833854023e-06
ALDH3A1	17.0957285449082	3.63185962912563	0.326726756775633	11.1158928793202	1.04995011028185e-28	1.31145768441605e-25
ALDH3A2	2398.73948132601	0.312320492728344	0.0782343397337761	3.99211514778728	6.54865584252123e-05	0.000257493422592818
ALDH3B1	267.952980799176	0.800215155678071	0.129530332885718	6.17782057569544	6.49925144828241e-10	8.20552393093121e-09
ALDH3B2	0.418772539990259	0.648386443936846	0.547810326295233	1.1835966078292	0.236572783836137	0.33391801099547
ALDH4A1	3079.63619415575	-0.0175014767257178	0.126931895505151	-0.137880842762705	0.890334591045945	0.936678583740627
ALDH5A1	2621.18872668847	-0.803741809882062	0.104167530933911	-7.71585735666517	1.20171652618281e-14	4.68094819845344e-13
ALDH6A1	1329.89925580655	-0.668066975219769	0.142442747478215	-4.69007364044239	2.73106740883283e-06	1.49355747145043e-05
ALDH7A1	2320.71341893777	0.471345282654726	0.178737129915378	2.63708655766085	0.00836214911090959	0.0186161152259983
ALDH8A1	23.6485435753145	0.0502142670228614	0.208000772891615	0.241413848250588	0.809234380761928	0.878385687848646
ALDH9A1	3259.06768777199	0.0142515399501971	0.0817480051591914	0.174335017991502	0.861602180225974	0.917110467487436
ALDOA	19787.4054373597	-0.201912216837576	0.0834785498499336	-2.41873172450344	0.0155747220545896	0.0320914981210592
ALDOB	7.40396169574684	0.0765525977935097	0.179320333815728	0.426904167333171	0.669449130081772	0.766346850443703
ALDOC	18871.7828756513	-1.02079815205476	0.177386241230817	-5.75466363665989	8.68144767752822e-09	8.50709224300045e-08
ALG1	357.799507895369	0.503698238854497	0.0862752318528167	5.83827163413242	5.2745114599989e-09	5.43283379409233e-08
ALG10	58.3406164935801	0.232262854877803	0.121634801202476	1.90950988188959	0.0561963481818755	0.0982086353451749
ALG10B	316.908246018219	-0.0487316288283305	0.0952033942003118	-0.511868607602343	0.608742970010695	0.712526287631685
ALG11	11.8568919222777	-0.176249641973824	0.114679165369661	-1.53689330930944	0.124319438221568	0.194411901721
ALG12	306.935566474423	0.431159193778759	0.0669153051098065	6.44335691320896	1.16859441753506e-10	1.71858595030901e-09
ALG13	453.192509581682	-0.0116142186990448	0.0611516990749904	-0.189924709774658	0.849368129272067	0.908838450602024
ALG14	165.781026185837	0.408095517281488	0.0688211524700773	5.92979778214153	3.03307981227426e-09	3.30679635806779e-08
ALG1L	25.9632318130189	-0.713768254362233	0.233978019976856	-3.05057823137761	0.00228401169712414	0.00592868428336353
ALG1L2	0.00553608702506999	0	3.58413516627555	0	1	NA
ALG2	448.595884518961	0.397607172001756	0.0515363380213429	7.71508390520672	1.2090266887541e-14	4.6996522905595e-13
ALG3	429.949734798443	0.35729508372491	0.0839340478007051	4.25685515100237	2.07322581584789e-05	9.15483358136365e-05
ALG5	385.655091219794	0.241550295461385	0.0616741116692188	3.91655897302436	8.98218509877865e-05	0.000341359472638371
ALG6	197.36826809125	0.545868508082125	0.0905430975562389	6.02882519833243	1.65155798690934e-09	1.92794956029491e-08
ALG8	504.811181485662	0.289835743412838	0.0502255916319092	5.77067853250931	7.89529665285184e-09	7.8226482330953e-08
ALG9	551.715501667744	-0.107319999548049	0.0480142280148071	-2.23517078135574	0.0254061389332397	0.0493580899059705
ALK	130.412538653759	1.36509900610283	0.279286093932276	4.88781588400119	1.01960816094264e-06	6.22671406444216e-06
ALKBH1	208.2883160136	-0.118154226563221	0.0568754655256023	-2.07741994674372	0.0377628167691455	0.0696107964371025
ALKBH2	457.706332587151	-0.270690633198364	0.0957594088950667	-2.82677844737939	0.00470188461762178	0.0112165151764402
ALKBH3	263.632572906623	0.226640414546289	0.0757774366028222	2.99086937625241	0.00278184461330192	0.0070652895045174
ALKBH4	480.672665007641	0.0723785218136159	0.0755415835870316	0.958128204053711	0.337998115004698	0.448366799966584
ALKBH5	2021.19676757242	0.121164840627872	0.0427045622818215	2.83728094034228	0.00454995570189822	0.0108984876030127
ALKBH6	128.732027126735	0.163286014557308	0.106785263614039	1.5291062552178	0.126238104916762	0.197001260513115
ALKBH7	672.330864460686	-0.019153403165477	0.103688738159658	-0.184720187605958	0.853448511241241	0.911732519339256
ALKBH8	239.6369032544	0.0884226871458077	0.0723794133053066	1.22165520702452	0.221838041959948	0.316578380239286
ALLC	0.887943690477552	-0.107384983543466	0.588574672865887	-0.182449209070766	0.855230210556443	0.912869208966303
ALMS1	579.084243753513	-0.0661258003622225	0.086620723946793	-0.763394686043498	0.44522804811801	0.559476372202484
ALMS1P	7.76982564019461	-0.488123098684	0.169378023152818	-2.88185615582254	0.00395340165650307	0.00961460714385274
ALOX12	5.06124004161308	-0.0583596291171734	0.152411035607002	-0.382909471645191	0.701786888274544	0.793523182782852
ALOX12B	4.01436555464494	-1.25774343142353	0.302699749248296	-4.15508580547862	3.25165491024838e-05	0.000137399653582349
ALOX12P2	5.57706027746175	2.32417596339152	0.367952230508693	6.31651548946544	2.67526646041827e-10	3.65067679551324e-09
ALOX15	2.26146242621931	1.57477709649425	0.509894023992588	3.08843999418425	0.00201210323222452	0.00531342722465943
ALOX15B	141.676359789203	0.941066352058683	0.415433792528141	2.26526192376355	0.0234966111415037	0.0461508026362525
ALOX5	361.700222737097	1.04726954669222	0.161285697411915	6.49325739044024	8.39999918425287e-11	1.27641836752767e-09
ALOX5AP	594.86643006327	1.20065266330705	0.173495506317827	6.92036749993725	4.50473484610793e-12	9.12440130558682e-11
ALOXE3	5.48014439002048	-1.28686660216613	0.272300344993424	-4.72590882026686	2.29088433029204e-06	1.27402816302617e-05
ALPI	0.00519988367724416	0	3.58413516627555	0	1	NA
ALPK1	178.54170938887	1.39879392729568	0.14920884656692	9.37473855927386	6.93474178094646e-21	1.3394775464723e-18
ALPK2	9.16859254400885	1.16997713042101	0.399049833671218	2.93190732510107	0.00336887261276335	0.00837235671478102
ALPK3	281.953738707917	1.10036877786835	0.159343406625323	6.90564361069381	4.99763211114819e-12	9.98247710388833e-11
ALPL	513.053442243813	0.0225540391048924	0.152839468741118	0.147566850962396	0.882684617726522	0.931769620695482
ALPP	0.079508311076885	0.473670536045155	3.58413516627555	0.132157553794873	0.894859673731214	0.939013769085859
ALPPL2	0.0267387149451062	0.0180848773189831	3.58413516627555	0.00504581341941298	0.99597404045961	NA
ALS2	803.745497589789	-0.119395998653254	0.0630917997839959	-1.89241706627523	0.0584354339310659	0.101702154271714
ALS2CL	60.4561118853246	0.497094159091203	0.217819171089408	2.28214145065845	0.0224809904672512	0.0443699396812829
ALS2CR11	3.84445976739564	0.310714292398377	0.233223043780389	1.33226240152734	0.182773977517978	0.268985409062668
ALS2CR12	10.416426472185	1.30592172661603	0.252114666647471	5.17987209543063	2.22038091042182e-07	1.57520093667789e-06
ALS2CR4	850.472196592223	0.378659625501859	0.085518340681715	4.42781773457424	9.5191286430432e-06	4.57778219343063e-05
ALS2CR8	237.106876904086	-0.265428003409618	0.0886959766248608	-2.99255967981777	0.00276648571344195	0.00703009308653851
ALX1	0.29189572346678	1.75152714145197	1.32578406791115	1.32112550138847	0.186459521321313	0.273442829639646
ALX3	58.8800847647222	0.195982958104652	0.138185211261038	1.41826289742707	0.156114024686776	0.235807188530429
ALX4	3.33928494635461	2.22005295919826	0.57751447787842	3.84415117583533	0.000120970419392536	0.000442849116400656
AMAC1	0.096614204017904	-0.342587852086669	1.48140228224587	-0.231259163154042	0.817113469885012	0.884682922378826
AMAC1L2	1.13113858479272	-0.286829693720319	0.278410472357531	-1.03024031851782	0.302897207411002	0.409694057035268
AMAC1L3	0.733039725561803	-0.965265556603006	0.352107132546491	-2.74139734012788	0.00611784752095192	0.0141441252656164
AMACR	329.736897578578	0.302062925059355	0.0914409633356377	3.30336551629077	0.000955317787489872	0.00275493828942746
AMBN	0.0899494168995847	-0.358856254208705	3.58413516627555	-0.100123527032495	0.920246257311434	0.954850411307915
AMBP	0.631094192630303	1.99925974216201	1.19156124925349	1.67784890908004	0.0933765985695669	0.152130778330383
AMBRA1	882.357795537486	-0.166854834067623	0.053300338644081	-3.13046480214347	0.00174529913022525	0.00468211977432706
AMD1	1822.01440324193	0.273384760864132	0.0815917976462326	3.35064024510747	0.000806249715047993	0.00236843754486347
AMDHD1	12.8663940210779	0.491927232775104	0.189646968237591	2.59391034481929	0.00948912279467476	0.0207672240019888
AMDHD2	208.141876224244	0.202055470942954	0.0938048272613733	2.15399864635917	0.0312402780729421	0.0589978681558958
AMELX	0.0694632632020615	-0.27750280896658	3.09382059650294	-0.089695830870171	0.928528929072657	0.960317518389975
AMELY	0	NA	NA	NA	NA	NA
AMFR	3885.25516406719	0.0938065190682861	0.0532557051910689	1.76143605143769	0.0781646276683041	0.130571724678437
AMH	99.8312689404631	-1.29720471345072	0.263005400884293	-4.93223602667162	8.12936010205468e-07	5.0736739131278e-06
AMHR2	0	NA	NA	NA	NA	NA
AMICA1	32.164568893746	1.73772639191416	0.301358304294576	5.76631327940956	8.10243849226107e-09	8.01093865915585e-08
AMIGO1	256.21948188849	-0.416492565441259	0.165459397290423	-2.51718894340107	0.0118295372397643	0.0252205518575585
AMIGO2	170.135868976457	1.98553512985706	0.244383587394822	8.1246664353497	4.48594376536226e-16	2.37425543468439e-14
AMIGO3	147.308089129907	0.147277076013415	0.0976526812608791	1.50817237286055	0.131510416130456	0.203836793234631
AMMECR1	108.519992802602	0.00610487958843636	0.086342417672113	0.0707054510752729	0.943632182367544	0.969302395373933
AMMECR1L	687.494315945778	-0.192160039835404	0.0503197269030467	-3.81878145335818	0.00013411251036053	0.00048442876308365
AMN	0.710250962717636	-0.366943816163192	0.422864457022264	-0.867757528611283	0.385527085023963	0.498807780195358
AMN1	344.116185630228	-0.215533537525077	0.0756636512684488	-2.84857436710767	0.00439155885162289	0.0105772267186022
AMOT	2519.23759340677	-0.139085208209492	0.155764763237481	-0.892918303977653	0.371900924168108	0.484287997999282
AMOTL1	1689.60095714742	-0.455115749767486	0.0998224370492052	-4.55925304191028	5.13358857673136e-06	2.6297643838146e-05
AMOTL2	2465.71370026334	-0.576636395932892	0.15323993361296	-3.76296427659196	0.000167911194544454	0.000591128173804002
AMPD1	0.0771841828016698	0.194351977966643	3.58413516627555	0.0542256273690159	0.956755403030216	0.977228281072033
AMPD2	1736.43921962655	-0.442651977505449	0.0655827887498186	-6.74951440680652	1.48340780804794e-11	2.6520160965254e-10
AMPD3	374.419778403442	0.762457282978227	0.142311407412102	5.35766806641382	8.43029363742159e-08	6.60326009994694e-07
AMPH	524.705088396571	-0.796604600567236	0.205644846893604	-3.87369103870315	0.000107199301442544	0.000397483893098657
AMT	222.285960507741	0.184397178174179	0.170643602420521	1.08059825014573	0.279875861262217	0.384101533592799
AMTN	0.0501707127971172	0	3.58413516627555	0	1	1
AMY1A	3.66761954866318	-0.378625694879448	0.298731490718249	-1.26744486819621	0.204996265061264	0.296450295012955
AMY2A	3.98985207546484	-0.725196050159755	0.275689817546492	-2.63047818237777	0.00852648423287572	0.0189183264585434
AMY2B	305.993181525797	-0.390964376945998	0.178016649735481	-2.19622365395001	0.0280759391224706	0.0538200998064744
AMZ1	163.759877168261	-1.40515594220122	0.171434012561386	-8.19648284028858	2.47522598044108e-16	1.39686246896217e-14
AMZ2	1724.43289272592	0.19524240557388	0.0577365279072468	3.38160974777588	0.000720624405659706	0.00214686259571319
AMZ2P1	493.683133488014	0.0491764261518888	0.0843912335243667	0.582719603662268	0.560082074116673	0.668643923833948
ANAPC1	414.815206656794	0.00394856152285036	0.0849757726853644	0.0464669093092039	0.962938108130433	0.980160252966929
ANAPC10	105.837095160871	0.160505332954271	0.0549254875875708	2.92223774433261	0.00347526154508055	0.00860414288440098
ANAPC11	1566.16996892485	0.0014687035838244	0.0912954400536949	0.0160873706612355	0.987164688965101	0.993261243351599
ANAPC13	1237.62737353851	-0.0347710929456395	0.0540563687028024	-0.643237675412646	0.520069890138409	0.631349556009981
ANAPC16	1291.86260304691	-0.106825536074266	0.0681585238848496	-1.56731000006313	0.117042249070284	0.184665564512071
ANAPC2	1070.01578848186	-0.139234247554352	0.0653539745170956	-2.13046335105343	0.033133378411626	0.0621657298137617
ANAPC4	476.62584601785	0.0382989701833198	0.0589363598104062	0.649836031721754	0.515798141699075	0.627409854111139
ANAPC5	2223.08280150735	-0.043568702210962	0.0547513852701942	-0.795755248857241	0.426174307302116	0.5406460709332
ANAPC7	1093.37367873904	0.125623803866499	0.0520516649780638	2.41344448673143	0.0158025349466317	0.0325072787395798
ANG	64.3744841906895	1.36563641857038	0.182024271285897	7.50249628207791	6.26137908528922e-14	1.95521997569965e-12
ANGEL1	862.924373613089	-0.318669276403808	0.0843746627213206	-3.77683615111251	0.00015883314447396	0.000562232721493314
ANGEL2	733.136845276768	-0.166852218773625	0.0516206508791354	-3.23227653917601	0.00122808145437661	0.00343730716002392
ANGPT1	217.205728070498	1.91692095054024	0.266681711946616	7.18804801629578	6.57241504153371e-13	1.59508767121989e-11
ANGPT2	287.543729534453	0.801511345524396	0.259542093720987	3.08817476977757	0.00201389995390349	0.00531667317688258
ANGPT4	3.79040637335295	-1.31203907366191	0.309084861246035	-4.2449153555195	2.18675952223957e-05	9.61537817617472e-05
ANGPTL1	131.255898888114	0.391973431645608	0.254217267638876	1.54188358362194	0.1231018858938	0.192797536914339
ANGPTL2	3476.74205394715	-0.861649808511077	0.15283473082651	-5.63778798085611	1.72248396741973e-08	1.58050853467646e-07
ANGPTL3	0.137564404473995	0.305539512350531	1.33902130695995	0.228181217701616	0.819505362409877	0.886299496081243
ANGPTL4	470.529792064288	0.914549468938369	0.235927392768371	3.87640221937373	0.000106012384379378	0.000393706250491976
ANGPTL5	1.95385273057167	0.775513326994992	0.331901302237497	2.33657813864213	0.0194611302776653	0.0390473052990294
ANGPTL6	18.593707564306	1.03511258744471	0.213862490940459	4.8400847801445	1.29783750133807e-06	7.68878840242793e-06
ANGPTL7	2.40293194415933	1.89490109267523	0.493557078355687	3.83927447457182	0.000123398419373177	0.000449804043847442
ANK1	202.900304834815	-0.65723038742952	0.208704704238123	-3.14909234954114	0.00163778430301485	0.0044215456341911
ANK2	6281.21327939157	0.0256886032934164	0.109488242542653	0.234624309394765	0.814500339989987	0.882363594683574
ANK3	733.194951971668	-0.13238188979574	0.231523997441845	-0.571784744814594	0.567467813531009	0.675352661774566
ANKAR	20.7148503348662	-0.0707075049876432	0.118471039075699	-0.596833669555844	0.550618436124473	0.660122025801646
ANKDD1A	281.570088149329	-0.261151851055948	0.108582664817691	-2.40509708888081	0.0161681696901314	0.0331393531686141
ANKFN1	89.0451343055156	-0.161300123214577	0.162919843771984	-0.990058175112948	0.322145684967957	0.430907514354226
ANKFY1	4266.4631017823	-0.0493268771949047	0.0672797329568705	-0.733161013384604	0.463460230729086	0.577775692523798
ANKH	1815.46899075249	0.054004567591016	0.104325628639311	0.51765389095069	0.604699774328529	0.708679237619274
ANKHD1	1623.77542673312	-0.213902723965936	0.0694421993049144	-3.08029881119848	0.00206793012094341	0.00543404470490822
ANKHD1-EIF4EBP3	391.916539824709	0.293150268233009	0.104703357784883	2.79981725930221	0.00511315435138093	0.012063979338556
ANKIB1	2797.20394474792	-0.00137088761528304	0.0936770271936408	-0.0146341921424264	0.988324020785023	0.993775114517848
ANKK1	3.20002184159404	1.99363007741935	0.402492814888798	4.95320662549009	7.30003857496942e-07	4.61604869188752e-06
ANKLE1	29.6617853713054	-0.41273870426847	0.151488798552399	-2.72454932782179	0.00643893111289987	0.0147879153384766
ANKLE2	1177.99843423156	-0.0579145632465983	0.0441078331908562	-1.31302217898576	0.189175474737527	0.276862341406211
ANKMY1	172.921709245259	0.068321300990574	0.0865925519591525	0.788997430434925	0.430113508364862	0.544831768827263
ANKMY2	630.165959332192	0.257971808393696	0.0807339677532517	3.19533172433862	0.00139670204595608	0.00384210975378552
ANKRA2	307.21481381346	-0.236839848478497	0.0572780038133979	-4.13491799138254	3.55081412524501e-05	0.00014866604123037
ANKRD1	1.85150773100607	1.03839089592163	0.510587378533519	2.03371830087936	0.0419800058925376	0.0762961868660961
ANKRD10	2078.15727874604	0.186611936017931	0.137778874787437	1.35443068689472	0.175599012880787	0.260367938311033
ANKRD11	2681.22333939603	-0.0650592684336639	0.0524108170759486	-1.24133284049715	0.21448281765825	0.308076515765484
ANKRD12	1110.66075400182	-0.149718530456797	0.0758444038457894	-1.97402211455459	0.0483792284176084	0.0861710451214289
ANKRD13A	1012.87085845435	-0.0494553896725478	0.0654405205021054	-0.755730383760573	0.449810863270803	0.563904348487191
ANKRD13B	753.792253902636	-0.58919867814414	0.108408250887296	-5.43499847402468	5.47969014064169e-08	4.47743019952301e-07
ANKRD13C	681.386516356981	-0.0960985445588014	0.0439417370404981	-2.18695370349684	0.0287459038794264	0.0549238481628526
ANKRD13D	623.926913974656	-0.125515648516028	0.0838818194803285	-1.49633912680522	0.134565303862473	0.207883866521051
ANKRD16	193.817958252886	-0.733769230231737	0.0841519777302895	-8.71957201746936	2.79255322710399e-18	2.71094700844665e-16
ANKRD17	2307.51515713661	-0.127491879104629	0.0818750026032422	-1.55715267237843	0.119434241928716	0.187791201475027
ANKRD19	65.1879067954583	-0.521289846757485	0.139147274668803	-3.74631733174979	0.000179449565348334	0.000627504116529748
ANKRD2	5.2429685880114	-0.0186665693066807	0.357190992530962	-0.0522593505911622	0.958322042561503	0.978030314320807
ANKRD20A3	75.1895781189559	-1.06888228736221	0.240560093269925	-4.44330675480264	8.8586722799871e-06	4.28989619637731e-05
ANKRD20A4	7.35051396488357	-1.70779135522978	0.362993339511524	-4.70474570560423	2.54182577498439e-06	1.40110761165365e-05
ANKRD20B	26.941479492558	-1.01267969530632	0.218572557605243	-4.63315114395691	3.60141402654322e-06	1.91475860389653e-05
ANKRD22	200.556271816595	0.762352075822536	0.276606724239534	2.75608656267647	0.00584975134798357	0.0135863321254271
ANKRD23	56.6210588788263	-0.540913835187904	0.118944254577898	-4.54762474326704	5.42547628706076e-06	2.76077467991229e-05
ANKRD24	210.609218185264	-0.546355235105717	0.169970085231508	-3.21441996314559	0.00130708348411453	0.00362324547394139
ANKRD26	254.118812127378	-0.713427156967296	0.0957299753709374	-7.45249493905004	9.15913724198288e-14	2.73581444053041e-12
ANKRD26P1	0.59443888981768	0.370254121284513	0.607405261503658	0.609566865403722	0.542148766537959	0.652473948247384
ANKRD27	623.115386703563	0.0579951187696067	0.0606982370701208	0.955466279895554	0.339341949875127	0.449793694110664
ANKRD28	1386.778596824	-0.62569043167105	0.0855020869267733	-7.31783812723672	2.51997573381681e-13	6.69705891472223e-12
ANKRD29	40.5164203159477	0.309941353042381	0.230423691578658	1.34509325373159	0.178595121552534	0.263871792241013
ANKRD30A	0.00511090731269006	0.0180853452939779	3.58413516627555	0.00504594398786897	0.995973936282382	NA
ANKRD30B	0.96391330581257	-1.61616757411648	0.596633384321835	-2.70881183752984	0.00675246230616145	0.0153947595240011
ANKRD31	0.653495901619542	-0.257497361416534	0.4435599844258	-0.580524326940517	0.56156108651549	0.67023878946071
ANKRD32	117.481864395424	0.567900591397124	0.103464229544161	5.48885923085844	4.04537849649511e-08	3.41723225925754e-07
ANKRD33	0.278259051399368	-0.880394993255023	0.703170136916663	-1.25203694957166	0.210556400392468	0.303320368887688
ANKRD34A	102.217283038495	-0.558827762445959	0.210046233812165	-2.66049884496236	0.00780249948735243	0.017499117835173
ANKRD34B	2.3811995679628	-0.265535047988262	0.527550774789005	-0.503335528403808	0.614728391413806	0.717783319302572
ANKRD34C	8.26118934946335	-1.54789657525673	0.455938339066938	-3.39496910574453	0.000686363451190529	0.00205229901396517
ANKRD35	301.251106925521	0.16223718167477	0.222068582262245	0.730572420565015	0.465040362886002	0.579283042286559
ANKRD36	219.188264916444	-0.586429864025815	0.134057595677355	-4.37446204418891	1.21732300507317e-05	5.70051582680602e-05
ANKRD36B	30.0029314445816	-0.756563532591839	0.167097327824139	-4.5276818154033	5.96342851873813e-06	3.00755845833318e-05
ANKRD36BP1	97.2550740516277	0.267887885325638	0.183398302595948	1.46068901147811	0.144100806014704	0.220415764673973
ANKRD37	84.6088875158398	-0.0373544333151517	0.118844377685666	-0.314313845068474	0.753282683848681	0.834624740661673
ANKRD39	140.331723317863	-0.101826008731024	0.085203477032034	-1.19509217555453	0.232051018698838	0.328586929574825
ANKRD40	2712.2661442142	0.169664018738042	0.0773750154230213	2.19274940121773	0.0283254393183723	0.0542089306505643
ANKRD42	253.656949973922	0.368065573935049	0.0806106760607191	4.56596560060863	4.972003029594e-06	2.5578102351036e-05
ANKRD43	227.709154842998	-0.265858815123859	0.279304913057558	-0.951858713165822	0.341168640683769	0.451964622205409
ANKRD44	165.44223291611	-0.257160514231057	0.152536484623199	-1.68589511464293	0.0918160030841321	0.149888005034791
ANKRD45	95.0006848232663	1.993091165284	0.240249407582849	8.29592541074922	1.07743125906275e-16	6.75142209692298e-15
ANKRD46	1267.78864371491	-0.460545710887346	0.0945107594715714	-4.87294476800683	1.0994696859989e-06	6.64505291512108e-06
ANKRD49	179.145846715647	0.0479919759291485	0.0577098279715783	0.831608369250107	0.405630036523191	0.519472615468113
ANKRD5	20.3253859955524	2.11149957308759	0.260999176143315	8.09006221509361	5.96342633137324e-16	3.08648496532069e-14
ANKRD50	570.64611376578	-0.167579131207561	0.106916068256698	-1.56738957894724	0.117023658309056	0.184651782219849
ANKRD52	1413.93166169533	-0.00883873735066719	0.073284365365961	-0.120608772505965	0.904000920116663	0.944496075026409
ANKRD53	24.9803987301993	2.0708428929663	0.246797150197654	8.39087036178421	4.82556217407302e-17	3.37357212288926e-15
ANKRD54	521.282456466255	0.147044841185983	0.0772917350750373	1.90246526414794	0.0571103558311582	0.0996293879751005
ANKRD55	8.56571860640687	0.257035586984799	0.238771540287926	1.07649172374082	0.281707400325981	0.386190813822169
ANKRD56	14.6323995981503	-1.5753589361836	0.373171304728056	-4.22154360805321	2.42635001174837e-05	0.000105942889350076
ANKRD57	345.679030135224	0.302510574211241	0.0869325729409241	3.47982998751014	0.000501732062613092	0.00156439539442817
ANKRD58	26.7458318048614	0.823074911923945	0.180459016040861	4.56100742418753	5.09087808112042e-06	2.61107833911503e-05
ANKRD6	741.993469807674	-0.151182084372456	0.101955309004383	-1.48282699399162	0.138120382137893	0.212412663525861
ANKRD7	3.77534649877927	0.67147511833809	0.292178924441218	2.29816411167323	0.0215524504445215	0.0427489637442891
ANKRD9	76.5627333141761	0.0857595981378885	0.176968955839966	0.484602498392099	0.627958341121676	0.729910508049861
ANKS1A	1137.01893999225	-0.213193128483858	0.0762453641023798	-2.79614545741547	0.00517161187744904	0.0121850251679936
ANKS1B	677.090254480106	-0.127749885803246	0.186732666712156	-0.684132498360177	0.49389150206144	0.606710672870649
ANKS3	467.345742230812	-0.151912931565378	0.125062593096636	-1.21469520025061	0.224482363850582	0.319597383670555
ANKS4B	0.086037562559366	-0.459196192059287	1.9269302491698	-0.238304522053732	0.811644914278344	0.880010255707332
ANKS6	521.481458609927	0.182149562479729	0.08455894373012	2.15411350289665	0.0312312718685889	0.0589915288690721
ANKZF1	721.020140586723	-0.412761820576503	0.117134295757812	-3.52383405650838	0.000425350547057921	0.00134868300045307
ANLN	1501.63769859107	0.715768313467197	0.234204518027843	3.0561678292735	0.00224185731339543	0.00582895345875338
ANO1	38.9096951339119	0.62882914818016	0.230411279005172	2.72915957454516	0.00634959700149325	0.0146060220282354
ANO10	523.116582836717	0.294927793488302	0.0702736539377304	4.19684728148103	2.70656307740767e-05	0.000116387803117535
ANO2	15.703152642862	0.0446459271322752	0.19912132739658	0.224214692197968	0.822590251765478	0.888609949093519
ANO3	88.0633074641989	-1.11927297315579	0.298961191535647	-3.74387380317333	0.000181204690024205	0.000632696808105387
ANO4	80.5951271442741	-0.0257630039637799	0.232281645100786	-0.110912784144444	0.911685507871868	0.949174242914388
ANO5	179.758410496248	0.033428686076055	0.219685566141937	0.152166055618133	0.879055965846085	0.928881201065493
ANO6	1767.60568959971	0.586265555645186	0.128897495292146	4.54830836174446	5.40788569162935e-06	2.75481637624708e-05
ANO7	18.8310543712626	1.12899078601716	0.21233422874966	5.31704564386662	1.05465619309398e-07	8.09174383038854e-07
ANO8	971.657967190783	-0.345981736896693	0.10076745095315	-3.43346719227373	0.000595914315875803	0.00181462335049888
ANO9	2.18925170734362	2.91879575611793	0.514322452070434	5.67503079900197	1.38663705384336e-08	1.29965141774934e-07
ANP32A	2850.73552364549	-0.134546973253197	0.0590368269288946	-2.27903463401326	0.0226650065797521	0.0446954597703647
ANP32B	2483.64450489623	0.0675157374392368	0.0943770872929698	0.715382720274586	0.474372586918334	0.588482075647349
ANP32C	2.34911657972759	0.0234854168013268	0.229470338301895	0.102346198533202	0.918481886676537	0.954094766736965
ANP32D	0.0816096894846889	-0.0117446749904977	1.48679502907177	-0.00789932355223848	0.993697317244129	0.996691828359661
ANP32E	1868.4302930882	0.131858629322654	0.0688558403631262	1.91499557085163	0.0554930684621869	0.0970882557388676
ANPEP	53.2464933769672	0.690076292623026	0.181497909346372	3.80211703323855	0.000143464924904438	0.000514638872871826
ANTXR1	5361.17256869657	-0.0185299155509628	0.094284622919273	-0.1965316822323	0.844194037333531	0.905163069902772
ANTXR2	377.809338428304	1.03324278570417	0.142961669271021	7.22741131222656	4.92287416723441e-13	1.22327546946026e-11
ANTXRL	0.329296384433132	1.26905465834218	0.734251692980453	1.72836463364609	0.0839228719401481	0.13876788709475
ANUBL1	106.149559720034	0.132217769993209	0.151258960708764	0.874115287938427	0.382055472691169	0.495008738059673
ANXA1	2785.08015790617	3.11165997078643	0.259200115157863	12.0048556648646	3.35047911433653e-33	8.96779666945845e-30
ANXA10	0.0145733136802935	0.09401624941709	3.58413516627555	0.0262312231697408	0.97907291195764	NA
ANXA11	1143.42202478479	0.457896113097658	0.123437557217171	3.70953641193705	0.000207639095028782	0.00071355944322437
ANXA13	5.26261827039528	0.637936066289724	0.326674259457557	1.95282011918851	0.0508409136708561	0.0899620591452696
ANXA2	2042.97850276768	1.67225037177438	0.203935779585089	8.19988711729053	2.40612864174769e-16	1.36609776459954e-14
ANXA2P1	12.0915547309014	1.60258763345145	0.232496737249958	6.89294676737121	5.46483289595669e-12	1.07438729421453e-10
ANXA2P2	712.857777787946	1.85751581410522	0.226175573368561	8.2127162824888	2.16240075715853e-16	1.24495167953159e-14
ANXA2P3	1.34700484355201	2.54453264410944	0.467785563977313	5.43952793770447	5.34219318678302e-08	4.37925596686407e-07
ANXA3	45.9261355025901	-0.222696421585703	0.288497418849805	-0.771918246178978	0.440162849812994	0.554823140076444
ANXA4	448.335792337727	0.91578024531638	0.110034670771051	8.32265175057274	8.6016890376961e-17	5.55728433828532e-15
ANXA5	6749.05260314707	1.07508815999746	0.128606489858441	8.35951716885227	6.297546094309e-17	4.24427423104221e-15
ANXA6	4618.46482151372	-0.296932608533054	0.082981874901109	-3.57828271398922	0.000345859228637705	0.00112208112688416
ANXA7	2062.14350171724	-0.1084846291572	0.0666764531181556	-1.62703059451823	0.103730600143488	0.166537834129254
ANXA8	2.19595743519418	-1.15490542671106	0.427923523834963	-2.69885940450536	0.00695775638555662	0.015807023601284
ANXA8L1	0	NA	NA	NA	NA	NA
ANXA8L2	1.68559881446822	-0.051204478542334	0.502162180607934	-0.10196801057448	0.918782066564586	0.954282432460451
ANXA9	48.8408261175581	-0.248204153624983	0.0965816866263019	-2.56988837423544	0.0101731289096209	0.0220555129889676
AOAH	254.425620754298	0.684994344144046	0.172031073101725	3.98180591327822	6.83936199942884e-05	0.000267632177153924
AOC2	24.9929613767007	-0.864783656953658	0.173512196618245	-4.98399348177419	6.22851785164375e-07	3.98557071271849e-06
AOC3	52.4057787986398	-0.110202794828758	0.183043400223593	-0.602058280681752	0.547135343621097	0.656870934133338
AOX1	33.1929846730228	2.03568584523145	0.310642511476884	6.55314636606953	5.63372481105073e-11	8.91083037053629e-10
AOX2P	0	NA	NA	NA	NA	NA
AP1AR	372.513669693916	0.0509570324520999	0.0760697777417434	0.669872240524994	0.502939237055181	0.615444422014622
AP1B1	4544.16781166567	0.0251997940149745	0.0709789676731451	0.355031847335656	0.722565732645018	0.810173044095575
AP1G1	2111.2642670852	-0.0260431030869485	0.0529407490010193	-0.491929252577198	0.622769357901127	0.725093629731265
AP1G2	345.004245070615	-0.312034829107864	0.123091787615475	-2.5349768262577	0.0112454765002589	0.0241180457542183
AP1M1	1739.54996254838	0.211092794267902	0.0456180363508826	4.62739765131993	3.70289121039859e-06	1.96425169077089e-05
AP1M2	0.704454957807935	-0.43319708062644	0.540282678109749	-0.801797092851538	0.422670340587833	0.537132023154496
AP1S1	1117.86423781976	0.0785432602534208	0.100499890825336	0.781525826629255	0.434493292849106	0.549228601728569
AP1S2	1049.21617980111	0.369980744321493	0.103356301676385	3.57966314893819	0.000344037401586511	0.00111648813778218
AP1S3	25.9875637191524	1.33407613040127	0.172969649478788	7.7127758217772	1.23110230058198e-14	4.76568857514543e-13
AP2A1	2980.23113710453	-0.187560797065207	0.0660297110539499	-2.84055153462597	0.00450355957064799	0.0108066972484197
AP2A2	2430.33906158648	-0.202363427497828	0.0649298742252787	-3.11664591857539	0.00182921129423766	0.00487442793469446
AP2B1	10736.4798304066	-0.386429834209844	0.0628301697907892	-6.15038659765796	7.72943078982023e-10	9.62688795617309e-09
AP2M1	8449.3931071091	-0.0241380760556927	0.0685280545494395	-0.352236411997926	0.724660971720449	0.811820130986093
AP2S1	1037.26577301502	0.264555771809639	0.0936717612869237	2.82428522934767	0.00473861943135917	0.0112940813720831
AP3B1	877.229840075911	0.347749728374975	0.0600218223853685	5.79372159249443	6.88435470723858e-09	6.91239387967964e-08
AP3B2	741.318047663368	-0.769895556565565	0.134410837959217	-5.72792766011301	1.01664898766832e-08	9.82865605415565e-08
AP3D1	3702.03146383487	-0.0933403983619522	0.0513246383351969	-1.81862749333671	0.0689682803994685	0.11717353115383
AP3M1	1300.75659442341	-0.25084930315936	0.0684715008139673	-3.6635578332203	0.000248736022582475	0.000835293919560408
AP3M2	901.867598941947	-0.0204044748586822	0.0795460836806133	-0.256511369442254	0.797556002511876	0.869285006577226
AP3S1	616.713265965991	0.202422588359847	0.0599514085153889	3.37644424664162	0.000734292522838541	0.00218237701584754
AP3S2	2020.85289094655	-0.204141249818864	0.050211242637712	-4.06564823124971	4.789913807079e-05	0.000194841131327469
AP4B1	400.843163427	0.0205187433164552	0.0739808399022469	0.277352127166538	0.781509737133449	0.857231218016058
AP4E1	254.884768244671	-0.0275605321507796	0.0591828735482341	-0.465684251176444	0.641441526825183	0.742221371454831
AP4M1	386.044780000007	0.366903997513466	0.0802874177589313	4.56988165462142	4.8799970764787e-06	2.51392975597759e-05
AP4S1	128.737440268351	-0.216401621483168	0.0789342235552025	-2.74154367695564	0.00611512300880728	0.0141395711086034
APAF1	501.057552040841	-0.0546264583446016	0.0743040470733415	-0.73517473806888	0.46223308194281	0.576552761019938
APBA1	875.442290445115	-0.42361340682087	0.126361846477221	-3.3523837980417	0.000801188666146227	0.00235467778022207
APBA2	3630.5315201306	-0.373689936705491	0.0789548845559986	-4.73295526688348	2.21274268482137e-06	1.23816534661238e-05
APBA3	257.936834482158	0.151042688074457	0.0865740551180974	1.74466458650246	0.081043271123951	0.134743697557755
APBB1	3815.8209096256	-0.373032072359246	0.0913038479053984	-4.0856117339737	4.39608386806673e-05	0.000180269265379948
APBB1IP	873.993912881322	0.829843048987019	0.157329464786057	5.27455585077768	1.33077986986072e-07	9.929705950502e-07
APBB2	2257.78530909337	-0.412336642835435	0.101950833903917	-4.04446562177254	5.2442602596699e-05	0.000211031916291184
APBB3	502.344304342091	-0.378963240907673	0.12982957393665	-2.91892847998245	0.00351236798059843	0.0086836638999719
APC	3875.76935113116	-0.0696108366990552	0.103774994224848	-0.670786225708966	0.502356723562234	0.614972595404248
APC2	8236.31890084916	-0.581692890620415	0.0988346378100635	-5.88551649006181	3.96812817703597e-09	4.19707095158639e-08
APCDD1	2443.44060395108	0.0803389141939121	0.125019252756727	0.642612337079331	0.520475675840358	0.631705141060112
APCDD1L	22.1314924120695	4.80308813073808	0.802322236981664	5.98648262424746	2.14427484068202e-09	2.42603462651077e-08
APCS	0.0403066760592248	0.245878057660951	3.58413516627555	0.0686017815328252	0.945306600751789	NA
APEH	1530.28941947649	-0.0272387511760534	0.0591804300001202	-0.460266192320639	0.645325164521596	0.745759792910347
APEX1	3140.97009180712	-0.142552939198984	0.0695555939560547	-2.04948201993716	0.0404150042410242	0.0738458669260609
APEX2	349.468828386736	0.32936538256263	0.0521653853257626	6.31386848780678	2.72145231399985e-10	3.70560541824863e-09
APH1A	3698.69410406692	0.159896797657129	0.0462476441852211	3.45740416564235	0.000545406191669024	0.0016832038226175
APH1B	864.196766382849	-0.0667556707907939	0.068049603236075	-0.980985452026926	0.326599915719935	0.435652571616738
API5	1794.77632991765	-0.0232801140658172	0.0492613598829589	-0.472583666409715	0.636510237777333	0.737608598156612
APIP	330.854549588324	0.0853818540296346	0.0744293132718577	1.14715359145895	0.251318148070908	0.350897743666185
APITD1	183.350509543311	0.588439470176435	0.0785460680696145	7.49164769972836	6.80142861006171e-14	2.10630688327465e-12
APLF	28.7396034834306	0.684246506115266	0.127403510882331	5.37070369078942	7.84299883647603e-08	6.18982418703517e-07
APLN	1563.31576473628	1.06002158068072	0.200065549898686	5.29837136487276	1.16840145623994e-07	8.83777540739265e-07
APLNR	5139.53112207793	1.49581952947087	0.284869546691299	5.25089307314351	1.51363531127923e-07	1.11082926722004e-06
APLP1	6847.9038759523	0.288746508517778	0.169466365322	1.70385732867485	0.0884077446132569	0.145082552603484
APLP2	11976.2867478388	0.262020499759886	0.0832416760945567	3.14770811993561	0.00164555917009572	0.00444031098717326
APOA1	2.80308459529622	-0.0524098894440384	0.258392244758207	-0.202830737017984	0.839267332590707	0.901085130921668
APOA1BP	1608.51282526771	0.14710447175291	0.0831102106642193	1.76999276716117	0.0767283456258353	0.128475346543715
APOA2	0.15508408224813	0.97806911941608	3.58413516627555	0.272888458175097	0.784938958964274	0.859985751427088
APOA4	0.034405391471859	0.118422477754333	3.58413516627555	0.0330407398885549	0.973642099630857	NA
APOA5	0.0756194040095069	0.115711365635953	1.8032600429719	0.064167875336079	0.948836556428234	0.972518080026711
APOB	9.22810399865028	2.3695615412688	0.364580514130467	6.49941905677613	8.063077018809e-11	1.22721211230224e-09
APOB48R	210.985813403924	1.06515116915822	0.160562463160253	6.63387412097138	3.26988717628229e-11	5.43061479373283e-10
APOBEC1	0	NA	NA	NA	NA	NA
APOBEC2	2.30227940327392	-0.203650961608242	0.183072387658742	-1.11240676003996	0.265963299388354	0.36829921488102
APOBEC3A	2.45826546551388	1.25867420727485	0.31632317481455	3.97907680337608	6.91833906714275e-05	0.000270327425989544
APOBEC3B	28.2183930451373	1.01296385397232	0.217268129651951	4.66227539029778	3.12732321134378e-06	1.68711568349373e-05
APOBEC3C	135.416871742959	1.53608153017366	0.176559819433426	8.70006287445744	3.31700342096203e-18	3.13875636844164e-16
APOBEC3D	16.6261918202157	1.47191620649409	0.214247441156354	6.87016936374945	6.41257259458558e-12	1.23974137945837e-10
APOBEC3F	54.1475362125619	1.40153484063482	0.176838171788842	7.92552211130272	2.27189718276641e-15	1.04585419204697e-13
APOBEC3G	133.745883352992	1.47758921052363	0.163720316328668	9.02508157605422	1.79561537772651e-19	2.28861562701251e-17
APOBEC3H	3.38102302621267	1.82690889779386	0.296665089907129	6.15815261029119	7.3598416633956e-10	9.19906560409473e-09
APOBEC4	0.270088114007221	1.93425862356761	2.60746685890861	0.741815228431023	0.45819929266192	0.57228331093352
APOC1	2701.2557145226	0.714945310112002	0.18717160477467	3.81973168939114	0.000133596919024121	0.000483125241234497
APOC1P1	2.39495870844781	0.618265802596747	0.356755502512677	1.73302387277062	0.0830914257445569	0.137636013858193
APOC2	908.639529451756	1.21648406728284	0.196396558917499	6.19401925363599	5.86490579105704e-10	7.52120978105714e-09
APOC3	0.182162178617528	1.23297981125669	3.58413516627555	0.344010410895842	0.730838456645454	0.816212474707098
APOC4	4.09217766304501	0.685181596247442	0.258221863364958	2.65346081589939	0.00796710202271407	0.0178356247322697
APOD	5088.98141410115	0.607492954450954	0.223675501606121	2.71595659823628	0.00660845807321338	0.0151124216355091
APOE	66178.9027265267	-0.582613393984257	0.172631923247529	-3.37488792932507	0.000738457565600595	0.00219371189933292
APOF	0.276851590832369	0.0641867302530601	1.09245188192109	0.058754743632449	0.953147455498171	0.974991184257904
APOH	2.08837613106716	1.26954291076645	0.726009551707995	1.74865868882819	0.0803500349740389	0.13378105885307
APOL1	356.848474741673	1.60086711061124	0.19467364413285	8.22333766721277	1.97916592111998e-16	1.15160412105913e-14
APOL2	1520.97997451917	0.717339633319664	0.158244512106008	4.53310907135357	5.81217832358875e-06	2.93601976464704e-05
APOL3	305.200928956361	0.695905780294284	0.140938114049205	4.93766916769816	7.90618160674798e-07	4.95584538588257e-06
APOL4	379.304482855387	1.67429936097662	0.278122108723941	6.02001534023495	1.74400541700811e-09	2.01951084629567e-08
APOL5	0.0610153417825691	-0.0876755901073495	2.28431462886298	-0.0383815736236782	0.969383452274196	0.984036861993246
APOL6	825.22116478273	1.02905710003045	0.155311584442015	6.625758817203	3.45468843387799e-11	5.69279177635338e-10
APOLD1	1871.7176574649	-0.0955998314995026	0.187806795701657	-0.50903286615554	0.610729187078128	0.714226455845191
APOM	89.1125372851556	-0.0820063415643833	0.109793015971176	-0.746917650808615	0.455113270706687	0.569149795752268
APOO	405.492711954666	0.168832510757836	0.0792779892864658	2.12962654927802	0.0332024573731808	0.0622517003246187
APOOL	131.493074097166	-0.14353214965477	0.151462633154546	-0.947640660045277	0.343312419377926	0.454066178841227
APP	28601.9500926502	0.10688202565403	0.0829966122283972	1.28778781186759	0.197819836122184	0.287470134924783
APPBP2	1522.53624502883	-0.126135922168046	0.0596062214504935	-2.11615363461362	0.034331743115694	0.0640676831688887
APPL1	1535.84567876651	-0.267082764274709	0.0656776593888313	-4.06656946608739	4.77102680843438e-05	0.000194199344520588
APPL2	1972.46442775294	-0.266502141865686	0.0756875536273776	-3.52108278169117	0.000429788420207438	0.001360911921752
APRT	732.459484708871	0.284517271473648	0.0928447041293778	3.0644426533707	0.00218075978754349	0.00568508631966257
APTX	461.815874381404	-0.00922276789121709	0.0555933373061177	-0.165897000218445	0.868238008262542	0.921608255781938
AQP1	19485.2259556738	1.56404270996123	0.283701077389225	5.51299531307535	3.52777630200505e-08	3.01534748149483e-07
AQP10	0.0708322303969896	0.0397802278105754	2.28377645672133	0.0174186171739791	0.986102657051258	0.992831300686356
AQP11	68.8874842209461	-0.0248197706826147	0.0841199256601017	-0.295052218458947	0.767953989753707	0.846276082344751
AQP12A	0.0245107366878146	0.0804572596779102	3.58413516627555	0.0224481655811874	0.982090459440081	NA
AQP12B	0.536381116890336	-0.0386918431069212	0.745414167463774	-0.05190650351947	0.958603192204498	0.97823471727361
AQP2	0.376416241898645	1.88878327673953	0.910096053847033	2.07536695577958	0.0379525382985551	0.0698780225591321
AQP3	49.7422238306821	0.888119837825366	0.309572760526566	2.86885653736047	0.00411958606177171	0.00999023614462267
AQP4	30249.0448733707	0.981692260729746	0.215275775010391	4.56016131254138	5.11143404160475e-06	2.6194701368574e-05
AQP5	45.060203457527	1.95592202735896	0.565168723322004	3.46077542271314	0.0005386219419366	0.00166473452723922
AQP6	86.4985215067764	0.181646992673107	0.180434473565674	1.00671999692449	0.314069349732379	0.422184196913894
AQP7	2.2707359992015	-0.945258213470901	0.295500448793598	-3.19883850373151	0.00137982439863896	0.00380238122266503
AQP7P1	44.8540816990816	-0.360438607640736	0.353011708579883	-1.02103867628281	0.307236115018949	0.414366243233158
AQP7P3	5.9208334592121	-0.516867519464939	0.39937025796675	-1.29420633899075	0.195594157787519	0.284765882376793
AQP8	1.42916384667795	-0.119415065107372	0.388694194836275	-0.307221118024857	0.758675072438516	0.83896217654536
AQP9	18.7631548891878	1.34567310901685	0.334553161241787	4.02229978644355	5.76326384329838e-05	0.00022955040681981
AQPEP	4.22936465401829	-0.110813144404	0.205956270932514	-0.538042099433381	0.590547984321418	0.696581908476838
AQR	709.36324969735	-0.0301894167844608	0.08321508746146	-0.36278777930075	0.71676342155387	0.805399505532703
AR	102.214452007265	0.425644975726148	0.229672456854342	1.85326957161472	0.0638437302268521	0.109620246474551
ARAF	809.55966122607	0.0444869195331427	0.0612350416408655	0.726494476709135	0.467535692259265	0.58173387768426
ARAP1	2634.07634683303	0.0952012163849999	0.0740615373656402	1.28543397519543	0.198640675054355	0.288461609658844
ARAP2	1468.55954903909	0.216505888271297	0.142599324445196	1.51828130402192	0.128943498756322	0.200571639078327
ARAP3	405.095127722615	1.13609821520805	0.199874060036153	5.68407033410217	1.31526144216037e-08	1.23460613127839e-07
ARC	1347.03554383038	-0.0428932313030963	0.275448471153262	-0.155721435386839	0.876252600292107	0.926755219817833
ARCN1	2741.32689407386	0.077469949436822	0.0585001622561749	1.32426896694025	0.185413733142159	0.272271471443804
AREG	3.53196016867759	2.01284766366697	0.700952678762686	2.87158851753021	0.00408414382698848	0.00990685120953601
ARF1	6425.26129819938	0.0405006588143864	0.0461882095033745	0.876861416579212	0.380561915278894	0.493343258834934
ARF3	7482.90437444691	-0.213090952715014	0.0786501468579178	-2.70935225461135	0.0067414722907259	0.0153715741559012
ARF4	2809.81604883403	0.373267369752971	0.0703193990473499	5.30817064437125	1.10730951202426e-07	8.44041945373742e-07
ARF5	2498.01000873946	0.123728856896577	0.0808453559166716	1.53043864417032	0.125908189704985	0.196535519646139
ARF6	1210.3841104902	0.188947812955207	0.0509878000950147	3.7057455431124	0.00021076982433865	0.000722410502733889
ARFGAP1	2294.91132865847	-0.276828684920955	0.0994579683638196	-2.78337361475461	0.00537968172872449	0.0126228825133854
ARFGAP2	2648.5033720344	-0.336938100012053	0.0659973188113122	-5.10533012674903	3.30217516103914e-07	2.25389995691182e-06
ARFGAP3	958.702116746163	0.144020531470146	0.0593311179080557	2.42740296404548	0.015207354352411	0.0314243951854827
ARFGEF1	1029.69632241701	-0.0580713909962217	0.0662589209760331	-0.876431281113482	0.380795619062343	0.493606387072925
ARFGEF2	936.336466778296	-0.0771018250562844	0.0850301354456429	-0.90675881735568	0.364534352278158	0.476649844670499
ARFIP1	644.921488342822	0.413453707830589	0.0536118058153025	7.71198995338777	1.23870885734829e-14	4.7852472476861e-13
ARFIP2	958.485016886902	-0.184583330849118	0.0624415702074692	-2.95609687962392	0.00311559211469911	0.00781860887503382
ARFRP1	824.91172117732	0.0245962319998498	0.0870566804669627	0.282531241346652	0.777536194777441	0.853672320266635
ARG1	1.76607398153468	2.17746936004362	0.478596213345038	4.54970035141878	5.37223620946631e-06	2.73814520186509e-05
ARG2	177.966354610068	-0.0258738330596488	0.105021746933015	-0.246366431860551	0.805398589009887	0.875642544170443
ARGFX	0.0325941979359651	0.0180844093510797	3.58413516627555	0.00504568285293551	0.995974144635261	NA
ARGFXP2	0.537573468033967	-0.756339287509763	0.440119169046323	-1.71848749316837	0.0857077337637592	0.141332520665182
ARGLU1	2370.62567264911	-0.231534786010613	0.122482956050865	-1.89034289729634	0.0587121151064661	0.102128882056889
ARHGAP1	2762.70175883319	0.142307716320875	0.0731951492028246	1.94422332450664	0.0518685262542606	0.0915074112900025
ARHGAP10	152.850592207242	-0.119477445338325	0.127155856590369	-0.939614175406953	0.347415502430043	0.458586505109856
ARHGAP11A	190.285936238297	0.849891927589867	0.19372806002886	4.3870357627246	1.14905902374331e-05	5.41876915903717e-05
ARHGAP11B	13.3881051569563	0.828426413737305	0.237984554927272	3.48100915200347	0.000499528422674739	0.00155804303766171
ARHGAP12	1667.62484004093	-0.363600353548703	0.0943616979631203	-3.85326209041735	0.000116554511617016	0.000428777798872257
ARHGAP15	68.8944436186332	1.16115584307555	0.17436313828816	6.65941124067502	2.74926675410336e-11	4.64894060513362e-10
ARHGAP17	908.273404309081	0.0780502550193551	0.0634755244002847	1.22961181899279	0.218842502022253	0.313042687272021
ARHGAP18	260.226708994172	1.44561479308001	0.155387087114801	9.30331355019207	1.36135523467264e-20	2.40625959215345e-18
ARHGAP19	526.413159625786	-0.179393713242115	0.0780308054381909	-2.29901142548394	0.0215042905296535	0.0426669900840398
ARHGAP20	149.895321838103	0.53682216449652	0.199853346959796	2.68608043179037	0.00722956831234148	0.0163511820255951
ARHGAP21	5342.28613378445	-0.108203170108735	0.0870403249176778	-1.24313839833518	0.213816838132056	0.307237693016504
ARHGAP22	459.155329910927	0.22868273744941	0.165574516537275	1.38114694357527	0.16723378423496	0.249863810321069
ARHGAP23	1978.01157725497	0.33452702440875	0.126269722659486	2.64930513319392	0.00806574718090162	0.018026940138539
ARHGAP24	453.708213941228	-0.121537749544166	0.134590738705514	-0.903017181665766	0.366516776126591	0.478874359658842
ARHGAP25	300.133250112168	0.941041389711594	0.128332814327933	7.33281970507498	2.25360029994391e-13	6.03192217424987e-12
ARHGAP26	849.715545958222	0.0430305707806738	0.123910022677317	0.347272721374062	0.728386442245579	0.814569525561671
ARHGAP27	369.462887282651	0.364383340641427	0.114626938785648	3.17886305349934	0.00147853928342387	0.0040458466502453
ARHGAP28	50.3932715450699	-0.627019325610255	0.215566473116992	-2.90870521999013	0.00362928889286446	0.0089389189820834
ARHGAP29	392.963347665088	0.481029629978611	0.15877533901752	3.02962432928915	0.00244858098652795	0.00630433054329911
ARHGAP30	487.196629638214	0.771099802551337	0.15197941370971	5.07371218067852	3.90129008158628e-07	2.61612637682894e-06
ARHGAP31	2454.90635839737	-0.668803279786398	0.0998459925650619	-6.69834875296162	2.10787731493022e-11	3.66310891793391e-10
ARHGAP32	1967.26882324965	-0.909181022686661	0.0928714137909836	-9.78967569862631	1.24695184634386e-22	3.48699847658186e-20
ARHGAP33	1403.6238370528	-0.419307891155075	0.105150194527219	-3.98770437886859	6.67157234444742e-05	0.000261722318772125
ARHGAP36	405.817643962726	0.245380941367842	0.322583313684779	0.760674625618182	0.446851434302374	0.561102370691595
ARHGAP39	721.163344683543	-0.0732370830097537	0.0922258333101335	-0.79410595037374	0.427133753836484	0.541716510653243
ARHGAP4	643.329900079356	0.486330000161709	0.147515336007099	3.29680976450005	0.000977897125051442	0.00280967344501822
ARHGAP42	287.732245980812	-0.127463333094713	0.133067621940202	-0.957883903208197	0.338121304192633	0.448498460555977
ARHGAP5	3168.66030248346	-0.210818246872688	0.0938597162384041	-2.24609934188602	0.0246976455015887	0.0481514137479466
ARHGAP6	269.3640970891	0.22355954470334	0.156675346593443	1.42689676176977	0.153609654385334	0.232361576341322
ARHGAP8	10.1465977157292	0.146227886070887	0.219811745437104	0.665241458231028	0.505896067486098	0.61831609182794
ARHGAP9	187.913149187457	0.713623427836014	0.148062715562541	4.81973753571056	1.43747209052606e-06	8.41114212620122e-06
ARHGDIA	5564.17731244339	0.0467886188735278	0.0822739272837964	0.568693150044178	0.569564397239841	0.677245576358803
ARHGDIB	1858.72022010856	0.804086931417279	0.126484439776089	6.35720040220543	2.05463871716591e-10	2.86213464719855e-09
ARHGDIG	352.58977161104	-0.990129815851697	0.249525368174257	-3.96805271983503	7.24623059138172e-05	0.000281204176388003
ARHGEF1	1516.05904095814	0.150663480758624	0.108877322990121	1.38379119380346	0.16642240027162	0.249008951564372
ARHGEF10	936.360353373321	0.520836383553951	0.0976409279793694	5.33420149042416	9.59659160044092e-08	7.42675506922185e-07
ARHGEF10L	2768.32133874721	-0.439208741104513	0.104642553447242	-4.19722881978362	2.702008986268e-05	0.000116245328052163
ARHGEF11	1510.48508236031	-0.295797447127102	0.0665571052255896	-4.44426550891181	8.81926377363915e-06	4.27302110325583e-05
ARHGEF12	4057.64973896586	-0.0799314130433711	0.0794518514680838	-1.00603587665267	0.314398312346671	0.422505148481368
ARHGEF15	93.3842041183852	0.335491246544321	0.152056686731533	2.20635641717391	0.0273590540594205	0.052639106890724
ARHGEF16	17.7919450157367	0.764236610875305	0.226080081251496	3.38038011418243	0.000723856458389209	0.00215546322383665
ARHGEF17	2455.67722297511	-0.621210388106971	0.105723957486795	-5.87577690879159	4.20864800634389e-09	4.42002404971183e-08
ARHGEF18	1307.90768957952	-0.0373176791924522	0.0445445217411892	-0.837761361751146	0.402164743119085	0.516364164827796
ARHGEF19	38.3720270632303	0.508250908705535	0.170969123139511	2.97276431774643	0.00295130974977226	0.00744322781958985
ARHGEF2	2757.17818794588	-0.0261721813195848	0.0777674382694495	-0.336544213130734	0.73646051660727	0.820791400818144
ARHGEF3	921.610523806201	0.354542169971837	0.103724077472293	3.41812796615658	0.000630534539069722	0.00190530549521452
ARHGEF33	15.913821881206	-0.300951956917071	0.145027920593118	-2.07513115878841	0.0379743806444544	0.0699113683555564
ARHGEF35	11.3272664272845	0.819065147514849	0.246246748184166	3.32619680688038	0.000880397422061287	0.00256414209540498
ARHGEF37	728.353261601262	0.288510222399214	0.151315502882706	1.90667986361488	0.0565620560920027	0.0987556316223803
ARHGEF38	0	NA	NA	NA	NA	NA
ARHGEF4	3024.14289469336	-0.439158317652813	0.115051557947519	-3.81705667865127	0.000135053153966464	0.000487262833182297
ARHGEF5	16.3173875210041	0.642390589109828	0.276362793627112	2.32444671975847	0.0201015640378821	0.0401773953289693
ARHGEF6	4156.85647989215	-0.181497389977029	0.0915126632686874	-1.98330355050579	0.0473335330588264	0.084606093817036
ARHGEF7	2900.57000615123	-0.557242466750017	0.0978627348195575	-5.69412317954816	1.24007535278563e-08	1.17343696009048e-07
ARHGEF9	1879.55266492034	-0.479496450679156	0.0903469818262982	-5.30727691159667	1.11275066451094e-07	8.46811391156657e-07
ARID1A	2988.76204644435	-0.202944150892944	0.0675336664176488	-3.00508119369494	0.00265509962826839	0.00678107233304752
ARID1B	1466.32376559604	-0.241623600581549	0.0714826225408204	-3.38017257891691	0.000724403284652741	0.00215674875913773
ARID2	641.384941025651	-0.252199473773975	0.077568102042539	-3.25132969781402	0.00114866568760137	0.00324019878393545
ARID3A	46.6140129587572	0.156887451610487	0.118892817128065	1.31957047869003	0.186978464677244	0.27407514584516
ARID3B	88.5890040259744	-0.0169505509923985	0.0837137840124933	-0.202482198031674	0.839539774091052	0.901255784528159
ARID3C	0.633824795535992	-1.22885462345714	0.399525911559981	-3.0757820404163	0.00209951258426211	0.00550314322590023
ARID4A	708.63406169568	-0.352158201054823	0.0806768913034331	-4.36504425697719	1.27097023532844e-05	5.92445786840355e-05
ARID4B	1025.62526045429	-0.066943613902553	0.0593589291368666	-1.12777664415404	0.259414259476355	0.360482501338648
ARID5A	700.360832627053	0.36947118166993	0.161448509964446	2.28847687570046	0.0221097652591508	0.0437340120244351
ARID5B	1141.13730636226	-0.243314946340854	0.112912093389567	-2.15490598957698	0.0311691915928334	0.0589230121767053
ARIH1	1184.36270163251	-0.164626748866322	0.0512597613957691	-3.21161754139398	0.00131989963522095	0.00365498663397869
ARIH2	1733.88210590283	-0.0912698122330787	0.0528989421007488	-1.7253617673346	0.0844622969006028	0.139561301237295
ARL1	1219.12474950889	0.266879882229311	0.0608713986065792	4.38432315239205	1.16346955021085e-05	5.4775189555901e-05
ARL10	118.697720005074	-0.495757421423833	0.133376915372749	-3.71696571358198	0.000201629793812563	0.00069494772201475
ARL11	55.4057889923961	1.06592775815199	0.152987353878578	6.96742398066439	3.22796768625517e-12	6.74238601668638e-11
ARL13A	0.221719712858517	-0.0822522709012254	0.581575112981557	-0.141430176541674	0.887530116426525	0.934935581995242
ARL13B	277.867210884661	0.514659387379699	0.0814496836119	6.31874016640755	2.63704226794362e-10	3.60639590745925e-09
ARL14	0.00997247288730896	0.0180853452916136	3.58413516627555	0.00504594398720933	0.995973936282908	NA
ARL15	181.49665837884	0.247879557222634	0.129531925244363	1.91365608713842	0.0556641134633946	0.0973329752543314
ARL16	604.106456091113	-0.0895692836301893	0.0725312282624712	-1.23490647788373	0.216865312299617	0.310617574439693
ARL17A	60.114425689645	-0.0987860766482831	0.0996853831350265	-0.990978552136121	0.321696053302565	0.430405998609525
ARL17B	2.32498652193688	0.105099519553841	0.234386359587052	0.44840288376426	0.653862460946769	0.753012912182597
ARL2	1663.8973964245	0.0288534248673238	0.108209185629875	0.266644875842756	0.789742600210818	0.863733428144876
ARL2BP	2023.34750863303	0.193402454385965	0.0607245362698894	3.18491447223887	0.00144796795635448	0.00397089104658335
ARL3	1583.13698538605	-0.515569990914593	0.105457292779487	-4.8888984092609	1.01401805051206e-06	6.20060123837924e-06
ARL4A	586.090835895561	0.530537632291773	0.141931993982932	3.73797068161793	0.000185511573150641	0.000646650201776819
ARL4C	1223.08447696791	1.07445996573164	0.221822656589317	4.84377918041481	1.27392509181436e-06	7.56521728058126e-06
ARL4D	141.531243802986	-0.108030280451463	0.139360007890454	-0.775188535698006	0.438228261466553	0.5531661191698
ARL5A	993.385950983689	0.195102951012023	0.0632055546953878	3.08680070845514	0.00202323191468318	0.00533604633354506
ARL5B	158.356045358946	-0.570868107617832	0.162968093387713	-3.50294401653024	0.000460146163289608	0.00144677136487428
ARL5C	1.07530947136744	-0.877342786273953	0.347256212358691	-2.52649990136885	0.011520542076467	0.0246459096077512
ARL6	78.5487186492421	0.14388715314751	0.093136173758235	1.54491157776157	0.122367652606321	0.191791897208636
ARL6IP1	7515.9497899472	0.0888164542828546	0.0692890658125561	1.28182496388571	0.199904054904876	0.289959152488795
ARL6IP4	1901.48516246561	0.0606347534568367	0.101605996548039	0.596763532831144	0.550665268320189	0.660135931105449
ARL6IP5	3333.99021063754	0.254624186341149	0.0683920337737836	3.72300942509407	0.000196862170042966	0.000680769586180326
ARL6IP6	542.813863924455	-0.135179423985161	0.069743332118568	-1.93824154767007	0.0525937600080745	0.0925950655432516
ARL8A	2907.34404355602	0.0232500694034634	0.073919585445264	0.31453192362232	0.753117074265936	0.83453995170609
ARL8B	2577.38052088768	0.0687716488615829	0.0653081614257356	1.05303299557416	0.292325869933983	0.398125863130268
ARL9	5.85416267148794	2.70422007314444	0.42527611241471	6.35873963809049	2.03415852475158e-10	2.8399399493104e-09
ARMC1	689.202594104918	-0.114431568161772	0.074463730641679	-1.53674234658507	0.12435641673694	0.194453498913646
ARMC10	557.12853784884	0.319905152686039	0.0571900748846124	5.59371802417613	2.22257815823694e-08	1.98013430207928e-07
ARMC2	46.8912422065848	1.06091567783033	0.152801085774491	6.94311609405752	3.83543965868794e-12	7.86843952909814e-11
ARMC3	56.6622684808621	3.29359287458401	0.447756312804406	7.35577094146466	1.89828293350645e-13	5.17703479507669e-12
ARMC4	29.5888442086589	1.79155762509345	0.304081937862125	5.89169365891693	3.82257329449176e-09	4.06930302531805e-08
ARMC5	611.677561231397	-0.251573882042416	0.090786105765035	-2.77106149583636	0.00558738733158129	0.0130400210568644
ARMC6	866.628546764886	-0.0375521134713484	0.0713280022362105	-0.526470843063716	0.59856110511364	0.703774136517675
ARMC7	302.51621627876	0.0912548771673541	0.0613533461081616	1.48736593773514	0.136918188096615	0.210927410966796
ARMC8	800.263123323978	-0.157772882790733	0.0513460598762578	-3.07273592503418	0.00212106095437483	0.00555185778725437
ARMC9	202.250422872344	0.561210415735879	0.101616902087075	5.52280579519124	3.33628437842617e-08	2.86211648874508e-07
ARMCX1	804.754963548306	-0.164792694724368	0.0615466049219967	-2.67752697217375	0.00741678806761182	0.0167382487635239
ARMCX2	935.716443612252	0.309688255939687	0.120546484699839	2.56903597571352	0.0101981869575073	0.0220944994028512
ARMCX3	2605.81175120476	-0.092340310423911	0.0725461482418145	-1.27284925060553	0.203071540641062	0.294007293520666
ARMCX5	187.126002963878	-0.0905561503131834	0.0833040790457433	-1.08705541613944	0.277012319693274	0.380980901546882
ARMCX6	288.499370436496	-0.00924289590636858	0.0698827246640414	-0.132262958417885	0.894776304828747	0.939013769085859
ARMS2	0.355379667902991	0.102152311096589	0.524046309212859	0.194929931383405	0.845447801778577	0.906108007131584
ARNT	788.533920887726	-0.00148481847088191	0.0548263806467267	-0.0270821902406677	0.978394179680107	0.98937787945199
ARNT2	7700.3781039696	-0.397296639944234	0.093430890099375	-4.2523049873726	2.11581440160713e-05	9.31873498554567e-05
ARNTL	376.28170810548	0.414116471351496	0.126763749437638	3.26683671939841	0.00108756387245783	0.00308829898671868
ARNTL2	46.1444309221486	1.41852503905441	0.235562667984451	6.02185843449545	1.72425677370302e-09	1.99911354654083e-08
ARPC1A	2026.16081186498	0.23467393599936	0.0560655453804199	4.1857068259487	2.84280078854314e-05	0.000121521139799553
ARPC1B	1396.06022501625	0.761364293900474	0.133771461612485	5.69153005224707	1.25905990014521e-08	1.18720414137497e-07
ARPC2	3061.07118637159	0.207777690703639	0.0525206824279032	3.95611178489278	7.61795247639961e-05	0.000293924953867016
ARPC3	2492.25387393638	0.373711277824844	0.0625869941841339	5.97106927240135	2.3570362970163e-09	2.64123397493405e-08
ARPC4	2943.37100668619	0.199492252307202	0.0690182204469298	2.89042880293614	0.00384716664481103	0.00939894565877942
ARPC5	2347.78710682909	0.521181383461955	0.082120705959029	6.34652828876044	2.20228066591367e-10	3.04291523278456e-09
ARPC5L	659.208112652522	-0.0192663385553054	0.0729402598395192	-0.264138606000233	0.791673116636596	0.864850536790773
ARPM1	15.3637132513074	-0.298657082860172	0.202707466495898	-1.47334031657988	0.140659294741504	0.215697540209267
ARPP19	5838.76616254044	-0.23583892996369	0.0614589284285221	-3.83734204279164	0.000124373183379831	0.000453180856438062
ARPP21	691.846260567712	-1.24846163312283	0.16793720885489	-7.43409778949932	1.05284063444526e-13	3.09095225269291e-12
ARR3	0.0252456432062698	0.131981467493513	3.58413516627555	0.0368237974771083	0.970625499271157	NA
ARRB1	470.903708182512	-0.365074779183066	0.157848999933426	-2.31281021315966	0.0207330760163135	0.0413118060450548
ARRB2	1728.1736363764	0.119118321980321	0.0892656459665183	1.33442513847937	0.182064565984392	0.268173090273865
ARRDC1	446.174856381972	-0.0851435399755764	0.0692840562335029	-1.22890524320088	0.219107335399789	0.313349747046061
ARRDC2	1027.04012753835	0.410824632640389	0.184853497239192	2.222433650302	0.0262540133402392	0.050784141435342
ARRDC3	1087.7943973505	0.0634570367037905	0.0997297275526303	0.636290083819815	0.524587366968793	0.635460587542983
ARRDC4	1247.49358336157	1.04134146335671	0.160028834682104	6.50721143739705	7.65586216083577e-11	1.17189733207042e-09
ARRDC5	3.71602891044244	0.704566934303511	0.214269397659807	3.28822940652563	0.0010081965016343	0.00288610689910163
ARSA	559.450095984911	0.499633601060552	0.113314189428252	4.40927657499514	1.03716498971138e-05	4.95091038146048e-05
ARSB	451.804263878832	-0.0455752770114599	0.0730841991865175	-0.623599594970558	0.532890576685632	0.64393665558091
ARSD	393.487743161655	1.44097631861731	0.17815165749772	8.08848112252759	6.04133481777335e-16	3.10962772378576e-14
ARSE	56.6282964811204	1.20305546114662	0.20360941092973	5.90864369015744	3.44935865643794e-09	3.70781318342061e-08
ARSF	54.8216235673061	2.08430572890404	0.399117416799143	5.22228707937586	1.76726706646335e-07	1.27794348735073e-06
ARSG	137.960511753825	-0.0329300538645899	0.158619429295184	-0.207604163064466	0.835538053532994	0.898349648283839
ARSH	0.0154660613673919	0.018085111306481	3.58413516627555	0.00504587870364111	0.995973988370996	NA
ARSI	74.4215476037121	1.05101414180592	0.254987631779134	4.12182400562978	3.75884327064462e-05	0.000156640764054265
ARSJ	116.27456365481	1.84299629638459	0.276482768187036	6.66586315114521	2.63114345218641e-11	4.47131695689357e-10
ARSK	158.224371050311	0.416777598724377	0.0918486863639029	4.53765443169336	5.68833722970139e-06	2.88200882465347e-05
ART1	0.488846449959087	-0.753129280845701	0.480018005979668	-1.56896047953168	0.116657147984809	0.184182044715884
ART3	41.3312418922501	1.00610397645915	0.284077311668104	3.5416555111399	0.00039762439632199	0.00127087865736759
ART4	0.172122982813313	-0.166319082561539	1.16917082677448	-0.142253876638696	0.886879477045102	0.934355256518052
ART5	2.17750566397146	0.453148571886414	0.283094767723054	1.60069568057054	0.109444338332613	0.174574248510118
ARTN	11.80045307165	0.226267769595961	0.21524636556834	1.05120367072643	0.293165057642987	0.398978754993753
ARV1	353.354847856967	0.112741782292581	0.0559940824889248	2.01345887424586	0.0440663772957468	0.079547899124493
ARVCF	1069.0981344612	-0.214520775537906	0.0999241435770581	-2.14683626857882	0.0318063188220816	0.0599279152705672
ARX	75.0097969535014	0.788180918377694	0.304873053082088	2.58527577432524	0.00973011377697987	0.0212079352868188
AS3MT	251.790003435035	0.0822764664834262	0.169174578903445	0.486340601624224	0.626725696869523	0.728881574924071
ASAH1	4991.11030067181	0.286715568026084	0.0903181708862457	3.17450591849561	0.00150091829839558	0.00409750914159107
ASAH2	3.41577756715184	-0.689271073841832	0.267213793696336	-2.57947415179145	0.00989508635677797	0.0215290046164924
ASAH2B	6.35397957963148	-0.741293483356464	0.295297511888621	-2.51032756292258	0.0120619216032121	0.0256110792336562
ASAM	11.1681307353769	0.0877318949311812	0.294172823037533	0.298232494848743	0.765525722285104	0.844444505901308
ASAP1	1893.48216395837	-0.112169966578538	0.0885202769044789	-1.26716691927635	0.205095611576272	0.296571071891104
ASAP1IT1	0.0196540780244776	0.0424918076163539	3.58413516627555	0.0118555259902514	0.990540880438088	NA
ASAP2	898.973994600581	0.214557868603646	0.0983006805954119	2.18266920741605	0.0290601791340314	0.055439519015906
ASAP3	1571.13775536644	0.0545380867321627	0.0948716990176045	0.574861495018051	0.565384973016931	0.673515568059843
ASB1	1017.88089060797	-0.509038885431653	0.0791041065003419	-6.43505006190106	1.23432641091936e-10	1.80252062626541e-09
ASB10	0.0731354659436738	0.511636222091845	3.58413516627555	0.142750258669377	0.886487422462646	0.934210649040352
ASB11	0.0792837690691598	0.370622762006567	2.48214155316148	0.149315723567219	0.881304508743357	0.930679814892095
ASB12	1.07945355615671	0.173451555241936	0.433434659545437	0.400179245987949	0.689024499622563	0.783585009100355
ASB13	842.473138547738	-0.816837135707324	0.0980441545077134	-8.33131908586209	7.99465343454825e-17	5.23733659963972e-15
ASB14	10.7296749896787	-0.296196454493408	0.102959244845341	-2.8768320410502	0.00401689338574534	0.00975635396361482
ASB15	0.00486125918343224	0.0180853452939779	3.58413516627555	0.00504594398786897	0.995973936282382	NA
ASB16	12.9116710046977	-0.134759238869268	0.133797987662137	-1.00718434726805	0.313846193609937	0.421914492607863
ASB17	0	NA	NA	NA	NA	NA
ASB18	0.00496815227201238	0.0180853452939777	3.58413516627555	0.00504594398786892	0.995973936282382	NA
ASB2	23.0890517051619	0.0256847281256571	0.299405952981088	0.0857856294102458	0.931636830431801	0.962246287484577
ASB3	906.222757173308	-0.362943148222807	0.0840456693482304	-4.31840392297916	1.57161609349696e-05	7.13766371591657e-05
ASB4	4.82120099699996	0.368549628416365	0.309826865457533	1.18953412213661	0.234229551906569	0.331134451408849
ASB5	23.3269210850969	0.960923140061696	0.404598644067815	2.37500336234601	0.0175487903334033	0.0355991918240195
ASB6	989.273065986126	0.0598366488375714	0.0537928133726861	1.11235395745176	0.265985992781349	0.368303418871581
ASB7	361.77505570515	-0.0060772227882733	0.0554001874482331	-0.109696791079488	0.912649845406281	0.94991431051231
ASB8	800.904875662771	-0.168301213892779	0.0456711954874197	-3.68506258915727	0.000228646445360573	0.000775089524204034
ASB9	9.51575094747626	1.01243794132059	0.189864449988831	5.3324250083686	9.69097950425932e-08	7.49051947160902e-07
ASCC1	917.161667409087	-0.410277850407723	0.0836376688830699	-4.90541948247403	9.32278791066399e-07	5.75335159071807e-06
ASCC2	1069.26039829582	0.0904096903550404	0.0655755652387417	1.37871004277104	0.167984171852717	0.250764994329735
ASCC3	926.910408036719	0.0531779251669217	0.0999261779820796	0.532172111861002	0.594606796371084	0.699871399472838
ASCL1	1522.44235613151	-0.227950313410765	0.157169625936898	-1.45034584164682	0.146962101605097	0.22400601494249
ASCL2	13.5345458213945	1.34619628738096	0.194621241747343	6.91700595112117	4.61288717134119e-12	9.32330680067406e-11
ASCL3	0.0200332236567184	0.00452635555243362	3.58413516627555	0.00126288639865588	0.998992362708308	NA
ASCL4	0.718023106442463	-0.482801473793747	0.446766613105115	-1.0806570133748	0.279849711321818	0.384093780039966
ASF1A	742.667767260605	-0.285796901135583	0.0777272926047874	-3.67691825558298	0.000236068647400024	0.000797364733673489
ASF1B	139.34820041669	1.17437811165551	0.226555064286051	5.18363213533256	2.17605933434047e-07	1.54609964687915e-06
ASFMR1	0.363821828339865	-0.220555710173172	0.470102448724915	-0.469165201694646	0.638951556708053	0.739751366649081
ASGR1	111.834731588101	-0.581536261214309	0.156272000895872	-3.72130809025606	0.000198193456465536	0.000684741397812701
ASGR2	9.7048623644909	0.992494806767276	0.245185574679449	4.04793311378471	5.16719067422024e-05	0.00020837814135211
ASH1L	2529.54285639344	-0.324007279108371	0.0861361926246887	-3.76156954742742	0.000168850456451994	0.000593877367727086
ASH2L	1012.66566737149	0.114552861908257	0.0460236165466756	2.48900174526879	0.0128102336899415	0.0270314830966038
ASIP	8.93648324651136	0.499972612572178	0.29719754849567	1.68229050038568	0.0925125223063286	0.150893585612551
ASL	315.606260342125	0.543463097605206	0.105394572926558	5.15646187953059	2.5165968744713e-07	1.75674214009293e-06
ASMT	0.581996708700825	-0.0322256075902164	0.503339101448312	-0.0640236522405872	0.948951393675863	0.97257006246436
ASMTL	1132.12288799647	-0.316559490699225	0.0793260433585333	-3.99061238020479	6.59029127854181e-05	0.000258967486146727
ASNA1	1821.60194372459	0.0891055991351919	0.0542539124199666	1.64238107743174	0.100511053955176	0.162174914476764
ASNS	895.804490696019	0.0127296808954614	0.112042205283603	0.113615051250017	0.909542955441578	0.948052301919677
ASNSD1	1033.61420916115	-0.135816463694212	0.044780180404334	-3.0329592794822	0.00242168275709622	0.0062445152954796
ASPA	139.847687218362	0.425543917877327	0.199801754547532	2.12983073567601	0.0331855901901698	0.062238760540843
ASPDH	52.964461546161	0.0106495419175315	0.230948893604064	0.0461121148984111	0.963220889988214	0.980224137462342
ASPG	0.291189650407168	0.235032077278558	0.748766319123398	0.313892427150993	0.753602742181754	0.834879030503778
ASPH	2923.17266780128	-0.211538656681766	0.0864330959914743	-2.4474265818574	0.0143880435128329	0.0299394028494488
ASPHD1	405.885706336321	-0.0619130791508551	0.190272815131241	-0.325391092301601	0.744885096345264	0.828062606213651
ASPHD2	213.85496107664	-0.0202388947462302	0.132024177159487	-0.153296882295894	0.878164159184496	0.928281922215329
ASPM	181.821730057884	1.00861545538274	0.303581330495997	3.32238960062151	0.000892499812610203	0.00259535565560527
ASPN	28.5295149390301	1.83402610271737	0.269797763626342	6.7977809677378	1.06242812949805e-11	1.96502008235691e-10
ASPRV1	153.17618338087	-0.278075718682823	0.0956393428048148	-2.90754526879521	0.0036427761598856	0.00897095874495487
ASPSCR1	557.277246275657	-0.0722956727569479	0.0977049159823337	-0.739938948107994	0.459337040145963	0.573627860039642
ASRGL1	1148.89340259464	-0.231993826990491	0.106432357714236	-2.17973022465008	0.0292774647523651	0.0557745378342972
ASS1	300.98934700728	0.767085273734193	0.213155356236864	3.59871451169065	0.000319794011218265	0.0010478594953105
ASTE1	166.401923650145	0.272587802796795	0.0587974932550821	4.63604462887938	3.55139321267132e-06	1.89192218460648e-05
ASTL	0.11744077228341	-0.190725494247384	1.19844837841228	-0.159143687523746	0.873555669130787	0.924937189771009
ASTN1	4081.33567629708	-0.381299438017887	0.110552044575076	-3.44904917392954	0.000562564245170084	0.00172807890828726
ASTN2	1991.67427090057	-0.0933842544093172	0.129481871817537	-0.721214893625512	0.470777309731389	0.585029095650813
ASXL1	1714.52898572212	-0.110717750697802	0.0598736749971018	-1.8491891587273	0.0644305036241541	0.110425349058009
ASXL2	406.957724130465	-0.0762934611125169	0.168989931815961	-0.451467494499049	0.651652647594379	0.751114365138621
ASXL3	168.669637989382	-0.683242095133483	0.174966463571478	-3.90498888293733	9.42297167750801e-05	0.000355801687524768
ASZ1	0	NA	NA	NA	NA	NA
ATAD1	1021.93643241004	-0.474225251302606	0.0827044497611428	-5.73397504816496	9.8103770010253e-09	9.52369033633213e-08
ATAD2	596.309914944301	0.470745161223433	0.136529125857296	3.44794678987009	0.000564865306521412	0.00173383295920465
ATAD2B	290.12410457654	-0.210703090387352	0.0817182599293161	-2.57840892071863	0.00992564618108643	0.0215864082238927
ATAD3A	806.182835026699	-0.0464637929392031	0.0907504294259755	-0.511995295593651	0.608654302034631	0.712467012552845
ATAD3B	323.897294465289	-0.138371574731717	0.148802179024819	-0.929902879370051	0.352421372045004	0.463952137902979
ATAD3C	39.3153215992323	0.988874049137109	0.231912706329844	4.2639925374794	2.0080615323015e-05	8.89433590288436e-05
ATAD5	66.9127318047038	0.362396947359006	0.161703072346859	2.24112592357956	0.0250179194289038	0.0486947577830814
ATCAY	2844.58445648933	-1.1964224652982	0.18650353921861	-6.41501212422473	1.40811654750804e-10	2.03254789168802e-09
ATE1	194.533048866296	-0.548774631538573	0.139494750755732	-3.93401635950824	8.35380937057781e-05	0.000320337642994568
ATF1	221.632207581079	0.00489349326218833	0.0607151043482526	0.0805976258250335	0.935761954381318	0.964751883414317
ATF2	496.089800809273	-0.199887226628157	0.11662957421679	-1.71386398321757	0.086553709114597	0.142476743452037
ATF3	456.933760211646	0.819425292870919	0.221095453416995	3.70620598572621	0.00021038721131878	0.000721283584861602
ATF4	4824.90326412755	0.0229015882843808	0.0805545234293216	0.284299221315294	0.776181082835227	0.852784188588565
ATF5	499.145032097802	0.702316528066702	0.127276247817654	5.51804865486683	3.42784538844764e-08	2.935288445976e-07
ATF6	1051.26620721222	0.0636603620638906	0.0870611543391076	0.731214311906896	0.46464825966543	0.578833097944913
ATF6B	1808.14010846381	0.027205514297038	0.0537248063394788	0.506386456288564	0.612585380484597	0.715905669209045
ATF7	1154.11517657606	-0.0634651177464905	0.0733062623735243	-0.865753016067177	0.386625619685326	0.500021923823033
ATF7IP	1127.98434912882	-0.289847343009456	0.141239073667021	-2.05217533281751	0.0401526258361219	0.0734175863994056
ATF7IP2	33.6998455874496	0.676070312091395	0.176549158412443	3.82936015198669	0.000128476868123752	0.000466229440473874
ATG10	69.148994369399	0.345824852285667	0.0802265561889655	4.31060323057008	1.62809802082828e-05	7.37346978927694e-05
ATG12	569.036977931963	-0.0418781165443116	0.0448366057919995	-0.934016208510239	0.350295532149311	0.461705036253921
ATG16L1	443.564432137696	0.0218699580107883	0.0609509004496201	0.358812713995346	0.71973520078954	0.807814684255732
ATG16L2	457.32390667655	-0.259348154693365	0.127508944335136	-2.03396048838512	0.0419555793693748	0.0762591904408815
ATG2A	1016.7348491332	-0.193668069720399	0.0528955683203611	-3.66132883850404	0.000250910463508286	0.00084142803728141
ATG2B	836.932110814033	-0.292375482188724	0.0715581890299382	-4.08584239137747	4.39171838189834e-05	0.000180129675138457
ATG3	900.18090455466	0.0781545814007008	0.0510591903927308	1.53066628749028	0.125851889777742	0.196480377208214
ATG4A	189.877414509618	0.207616308102561	0.0574621538522555	3.6130965197785	0.000302562012276289	0.000995924431132915
ATG4B	1422.46213604082	-0.0999059077353857	0.0773991292421116	-1.29078852325161	0.19677701850726	0.286198899142371
ATG4C	301.828794498395	0.529984925402695	0.0713818389114727	7.42464656955642	1.13081459206904e-13	3.27971241439715e-12
ATG4D	350.861232897461	-0.138204605299207	0.0846639485037523	-1.6323902645892	0.102597298697617	0.165026288636168
ATG5	528.693072391049	0.155140933270226	0.0555885300025093	2.79088029964496	0.00525649079953263	0.0123632452447958
ATG7	813.327286852339	0.201177960698886	0.0596735922288595	3.37130635486683	0.000748126129665576	0.00221716089297916
ATG9A	2246.02896945279	-0.142166347878236	0.0516396862925465	-2.75304437507313	0.00590438925275621	0.0136996454538254
ATG9B	32.2269534785393	1.58203429551711	0.249576681530322	6.33887062612019	2.31455485782482e-10	3.19333577438924e-09
ATHL1	341.771181891049	0.165365311379224	0.199563696908867	0.828634235287497	0.407311409547738	0.521447664454146
ATIC	1408.9279642909	-0.119328314679562	0.0732389431053969	-1.62930142926611	0.103249223746526	0.165864482218546
ATL1	738.083558781805	-0.443476854409702	0.115637337192927	-3.83506629584366	0.000125530430484708	0.000456775712868808
ATL2	451.434145169046	-0.0749147564447551	0.0697993473971836	-1.07328734778082	0.283142210159074	0.387845624326686
ATL3	217.352163106266	0.446324070848108	0.134843180843048	3.30994914283142	0.000933129240397927	0.00269884369374738
ATM	1464.87799301447	-0.179701652312032	0.0857346468128749	-2.09602137516528	0.0360802948279591	0.066844695332408
ATMIN	1754.91814146878	-0.12410513736561	0.0578577531981601	-2.14500443770354	0.0319524921791283	0.0601428464404409
ATN1	9148.02485003697	-0.319283658731352	0.0832098583809137	-3.83708931782762	0.000124501199177163	0.000453470930751037
ATOH1	0.092764781396874	0.305539265589918	2.25631880243453	0.135414935717527	0.892283815904985	0.937413343882236
ATOH7	11.0170128768816	-0.66674424132327	0.254712235507978	-2.61763727209087	0.00885408676291524	0.0195625199988184
ATOH8	1116.20606971188	-1.25231713691231	0.175709610209029	-7.12719774076394	1.02432886398098e-12	2.38704298452085e-11
ATOX1	806.350179163716	0.105277350649146	0.0996465921678445	1.05650728598743	0.290736513875456	0.396278140838829
ATP10A	495.688723830452	-0.423577738320932	0.156607299818983	-2.70471260797249	0.00683635063819228	0.0155595074777904
ATP10B	271.360873688781	0.325485619518918	0.220144518347047	1.47850885392388	0.139271629011464	0.213902224867512
ATP10D	399.917535341513	0.510608954373985	0.10982004109514	4.64950613095865	3.32730793081989e-06	1.78626019931091e-05
ATP11A	1330.9061756214	0.216435202453854	0.106733142765175	2.02781626069079	0.0425790041398208	0.077257429940314
ATP11B	510.079509577932	0.115735345484299	0.085807223292868	1.34878324974209	0.177406596413858	0.262405462257049
ATP11C	238.730527554481	0.0788783769932267	0.0871736308455176	0.904842166468997	0.365549009342109	0.477876516817873
ATP12A	1.02012880664951	0.68161892657563	0.627285206953854	1.08661725004743	0.277205998293497	0.381163333628868
ATP13A1	1528.83262251514	0.00618546588558717	0.0717115806217698	0.0862547698984816	0.931263892809603	0.961914124024518
ATP13A2	2025.22205690721	-0.220838178103579	0.0725754301530594	-3.04287797726914	0.00234327330340762	0.00606570442285786
ATP13A3	1078.97343482923	0.14583607348194	0.0855248961934605	1.70518854711093	0.0881592653276503	0.144773596389314
ATP13A4	778.949816601165	-0.398349144269338	0.160686737695594	-2.47904182997338	0.0131735855743822	0.0277263872524854
ATP13A5	45.1808606998761	-0.439295648612195	0.233014969977043	-1.88526792358223	0.0593936744936743	0.103065655766739
ATP1A1	8178.82439697805	0.238438060621717	0.100268012233274	2.3780072558633	0.0174064834013911	0.0353449520980235
ATP1A2	25609.0543124473	-0.114390321609482	0.228378943333642	-0.500879459111816	0.616455959544835	0.719428017318142
ATP1A3	5412.34797940938	-1.20269217156833	0.196629321116332	-6.116545410116	9.56256465869877e-10	1.16871631732146e-08
ATP1A4	9.47971818937159	-1.95958858106878	0.367796834992541	-5.32791039680513	9.93491112697368e-08	7.6632562731568e-07
ATP1B1	3471.1761751971	0.203688273127126	0.172869982860628	1.17827438723902	0.238687235268591	0.336345069193165
ATP1B2	16890.6644913009	0.292260925149539	0.138187597201033	2.11495771740182	0.0344335512144529	0.0642189983871138
ATP1B3	1604.03820531051	0.206433282838722	0.0738662555461749	2.79468996109702	0.00519495100854403	0.0122338615002616
ATP1B4	1.83385408056463	0.978161167361171	0.627377563478218	1.55912679111154	0.118966373774693	0.187134075983766
ATP2A1	17.2249924588951	-0.337153772963642	0.198513794233087	-1.69838964725932	0.0894342447589961	0.146548890135084
ATP2A2	7534.30145004326	-0.22567126185313	0.0909891965258611	-2.48019842431501	0.0131309288041645	0.0276521391564377
ATP2A3	87.7472656112095	1.07158483601584	0.198317562236632	5.40337841959363	6.53972881766719e-08	5.26324566700226e-07
ATP2B1	1403.37372661121	0.153411292547918	0.162897433421703	0.941766173508535	0.346312367146687	0.457470884516195
ATP2B2	1651.50393068526	-0.556058093093244	0.169553037654796	-3.27955252695242	0.00103971853097309	0.00296682400187508
ATP2B3	181.238102938696	-1.73005314268756	0.317299598612641	-5.45242776937644	4.96867564829486e-08	4.10463434508168e-07
ATP2B4	5687.92624466203	0.327143710451219	0.118223222921811	2.76716961664615	0.00565453268852188	0.0131786695424986
ATP2C1	2441.4859918767	0.0258904282543083	0.0569926860109951	0.454276330287601	0.64962995015042	0.749261701894682
ATP2C2	27.8800447167349	-0.500859569138809	0.240578631347762	-2.08189549642422	0.0373520162426368	0.0689659830193735
ATP4A	0.335992037094324	-0.977156452551521	1.24413990273285	-0.785407212167312	0.432214853531493	0.546828110997775
ATP4B	0.203607338238844	0.771974728964677	0.924749324339421	0.834793504192203	0.40383398389266	0.517915478871522
ATP5A1	9589.91490530899	-0.183728835494759	0.0630317458164555	-2.91486191783051	0.00355845946724539	0.00878641230605029
ATP5B	9991.49130147571	-0.201167881321014	0.0745673777606277	-2.69780012872106	0.00697993343416344	0.0158535619859966
ATP5C1	2363.52805150434	-0.322872994950593	0.0810298396975661	-3.98461845852931	6.75886344636799e-05	0.000264869411276199
ATP5D	1479.2876245986	-0.07448422446611	0.126969891117655	-0.586629033154719	0.557452879283016	0.666226774653733
ATP5E	3434.82254914775	0.265194827107942	0.0843664881180891	3.14336691052904	0.00167016345855172	0.00450052963604559
ATP5EP2	33.1094669201536	0.312923963817465	0.11733737749982	2.66687368070712	0.00765604417907777	0.0172159918073933
ATP5F1	2824.76903702574	0.108369895895883	0.0502992686924163	2.15450241550376	0.0312007927462192	0.0589575602906856
ATP5G1	933.598696826988	-0.0321427497285328	0.0764900986744425	-0.420221051947376	0.674323977143645	0.770417987577755
ATP5G2	3906.59328289832	-0.249081942447264	0.0718331471626755	-3.467507025457	0.000525310010279722	0.00162950469413922
ATP5G3	2142.7764179531	-0.0449402046020795	0.0806580063644248	-0.557169791663744	0.577411427004502	0.684491015270885
ATP5H	1667.08594907382	0.258158585622606	0.0711062577968971	3.63060289798954	0.000282759946056532	0.00093600536206982
ATP5I	1472.73587406022	0.102588790867083	0.101451788455544	1.0112073175727	0.311917214205089	0.41962238280653
ATP5J	1558.24923320902	-0.0494452069863591	0.0662348297039491	-0.746513687849204	0.455357166166005	0.569378795067156
ATP5J2	1610.73967822715	0.307688393419702	0.0896887185823332	3.43062537053919	0.000602191628839667	0.00183160103213312
ATP5L	2134.31414746868	0.0400732147972678	0.0646308732872866	0.620032080011373	0.535236666697596	0.646229809720722
ATP5L2	0.238386720552309	0.0180854778632853	0.719127117492192	0.0251492085660109	0.979935949818471	0.990042788729805
ATP5O	2591.95692013754	-0.0557196482128198	0.0684435342526509	-0.814096595408671	0.415589616135087	0.529765073336983
ATP5S	180.626456931284	-0.332627725982199	0.0689676281197622	-4.82295440702399	1.41447311771354e-06	8.29470057385945e-06
ATP5SL	693.864873377232	0.112281672518437	0.061244421156998	1.83333714969085	0.0667524479756832	0.113867246669293
ATP6AP1	3782.13510528051	0.0911598505715663	0.0608510303120658	1.49808228560907	0.134111872908725	0.207251736293127
ATP6AP1L	77.7690039939977	-0.461088243737879	0.112018143246997	-4.11619252357352	3.85182595798798e-05	0.000160052808048044
ATP6AP2	3414.62241553547	0.269638936181051	0.0644789033642774	4.18181640989938	2.89189445275081e-05	0.000123366426381464
ATP6V0A1	3885.0014714543	-0.449841876455554	0.0665100654105877	-6.76351577281631	1.34682703623457e-11	2.43103577561569e-10
ATP6V0A2	566.936251382787	0.110888474134947	0.0709032892810244	1.56393977288475	0.117831712983806	0.185645389712798
ATP6V0A4	5.56620031793951	0.459394969328361	0.436701132918125	1.05196651599823	0.29281491232341	0.398633078757291
ATP6V0B	2156.10558416412	0.114109998697528	0.0734537420191425	1.55349469694532	0.120304995202935	0.188985863177848
ATP6V0C	3804.16607745885	-0.141067841802538	0.0857007443920049	-1.64605153436331	0.0997531494378661	0.161104646829399
ATP6V0D1	2637.84961893204	-0.157003106141674	0.0646650152674478	-2.42794508734477	0.0151846421669527	0.0313878481509296
ATP6V0D2	1.2335457773556	1.58944726809298	0.706569115417189	2.24952836659794	0.0244789001597901	0.0477945678818077
ATP6V0E1	2381.66060195146	0.277410901906855	0.073289391360717	3.78514402639107	0.000153619583913991	0.00054625479677596
ATP6V0E2	6856.62953783577	-0.386687087073889	0.0937391981964794	-4.12513755732564	3.70513241203159e-05	0.000154539984131398
ATP6V1A	2393.07081178579	-0.365705343911128	0.0993231338954849	-3.68197548313316	0.000231433671155954	0.000782979642971822
ATP6V1B1	51.4405126393781	-0.509196782638221	0.202617728616692	-2.51309096254607	0.0119678472393333	0.0254690579141469
ATP6V1B2	3643.09236648306	-0.0638499426080589	0.0966447694397357	-0.6606663038073	0.508826337829985	0.620864230907366
ATP6V1C1	1921.73204765433	-0.254116317290335	0.0828000508045852	-3.06903576532906	0.00214750880202604	0.00560933011498116
ATP6V1C2	30.789251171646	0.0596961243798507	0.101066151497435	0.590663872081502	0.554745659324212	0.663987513489295
ATP6V1D	1444.46489638519	-0.0959523351582237	0.0709595407048417	-1.3522118971618	0.176307538854812	0.261254195506467
ATP6V1E1	2580.14551528304	-0.105800421887473	0.0768307791169461	-1.37705777688954	0.168494385524075	0.251386431532017
ATP6V1E2	76.9617637242409	0.180805037511334	0.101773016647891	1.77655181566323	0.0756420094489848	0.126889487781912
ATP6V1F	2392.70344356184	0.288792199055981	0.0759448790372625	3.80265532998328	0.000143153454684975	0.000513619901757504
ATP6V1G1	1695.41390683351	0.0294661968937888	0.0486185010545208	0.606069628941161	0.544468517624654	0.654489125770192
ATP6V1G2	2039.31253577154	-1.11643410596967	0.153531766894125	-7.27168148035163	3.55039973670688e-13	9.16257430674105e-12
ATP6V1G3	0	NA	NA	NA	NA	NA
ATP6V1H	1381.41949483118	-0.166104337581099	0.0813827599164491	-2.04102610616338	0.0412482322873072	0.0751119525838262
ATP7A	229.84123771067	0.327695419569513	0.101940873357263	3.21456358747358	0.00130642975942106	0.00362250524974293
ATP7B	144.757326355641	-0.673574593549839	0.105123776124982	-6.40744290567555	1.47980473747197e-10	2.1245687020134e-09
ATP8A1	1682.56460069466	-0.723976952009834	0.15597080989088	-4.64174644291675	3.45476647593158e-06	1.84674763746231e-05
ATP8A2	65.8835955089247	-1.56639415501426	0.350969208181573	-4.46305293598259	8.08000810229336e-06	3.95783089685146e-05
ATP8B1	39.5536058836392	0.900499328696116	0.191288364851144	4.70754888514449	2.50713168796823e-06	1.38239020911632e-05
ATP8B2	762.489548850537	-0.0360774315892456	0.0720336021833695	-0.500841697426245	0.616482537256766	0.719428017318142
ATP8B3	26.1226286138623	0.649914727573602	0.144986713303305	4.48258128463133	7.37455385288364e-06	3.63221979462744e-05
ATP8B4	170.711121999577	0.599299199816755	0.154939018681929	3.86796821688308	0.000109745964795403	0.000405802328084994
ATP8B5P	32.377854945639	0.0649809269944136	0.108146136421973	0.600862214262244	0.547931762169589	0.657379956726308
ATP9A	6794.72207340362	-0.443121068204001	0.116300219542235	-3.81014816608388	0.000138883531986968	0.000499735328463189
ATP9B	448.706511209998	0.00569542223265786	0.0582867966838823	0.097713762922106	0.922159586627051	0.956200233274914
ATPAF1	1933.25053242258	-0.0683561706100793	0.0692710253720448	-0.986793110726283	0.323744072764585	0.432541910407212
ATPAF2	346.212663752966	0.0147012262441554	0.0537479816377148	0.273521456921828	0.784452400727653	0.859639973920466
ATPBD4	137.111630045112	0.016582140654019	0.0810335372618912	0.204633059524816	0.83785882416661	0.900121727613854
ATPIF1	1446.78967996199	-0.0342961207606768	0.0804295951866436	-0.426411704312197	0.669807874251555	0.766557337061582
ATR	458.99456705793	0.190828921623674	0.0723190485987432	2.63870896148639	0.00832223934006594	0.0185338733240789
ATRIP	197.076747831283	-0.126875574335943	0.0840042708244568	-1.51034671321741	0.130954977943503	0.203160757369337
ATRN	2417.19764536175	-0.154040381416698	0.0665341056423889	-2.3152093190317	0.0206014795079296	0.0410845471059679
ATRNL1	662.003826524467	-0.809636434799506	0.187786059450038	-4.31148316957425	1.62163119586565e-05	7.34595795109741e-05
ATRX	1281.40849920285	0.349438737403511	0.141655544366751	2.46682005258334	0.0136318844029282	0.0285562372733969
ATXN1	1347.69091751579	-0.0896224617661556	0.0720920015302334	-1.2431678946876	0.213805970809197	0.307237693016504
ATXN10	2984.58183184717	-0.20227145547771	0.055922066306295	-3.61702399138533	0.000298009691247943	0.000982573284171276
ATXN1L	1152.4942950627	-0.0514053045387242	0.0666907101619326	-0.770801576619986	0.44082455260215	0.555502347171036
ATXN2	1097.90029707708	-0.0171927087286253	0.0593269375486971	-0.289795992158083	0.771972314162165	0.849405290001311
ATXN2L	2587.10398460308	-0.220061833574412	0.0641791999044184	-3.42886533179206	0.00060611019006809	0.00184172567647028
ATXN3	267.379513727786	-0.218149253786948	0.058156694770499	-3.75106003956758	0.000176088523597907	0.000616787171084385
ATXN3L	0	NA	NA	NA	NA	NA
ATXN7	430.819221346429	-0.0423129828428869	0.0632483417585202	-0.668997505174702	0.503497069416258	0.61584548195476
ATXN7L1	157.512456792486	0.315588272136229	0.100051512163597	3.15425789487522	0.00160906824440971	0.00435531676210059
ATXN7L2	291.611716850387	-0.53424371363948	0.136456613089403	-3.91511779124589	9.03600824984389e-05	0.000343103073187791
ATXN7L3	1418.38029702547	-0.226948628036036	0.0717436752931132	-3.16332592537005	0.00155977600681156	0.0042390431191792
ATXN7L3B	3316.67146841837	-0.357512592518089	0.07347449149452	-4.86580560472138	1.13991519714257e-06	6.84753162348933e-06
ATXN8OS	0.0619084492273274	0.00452635632318666	3.12727039533021	0.00144738246169747	0.998845156283451	0.999674158104526
AUH	184.940096397911	0.0689849124506394	0.0712673353915493	0.967973785909491	0.333057461766457	0.442816108689778
AUP1	2135.17962153741	0.0626688895497688	0.0634455378002391	0.98775881996752	0.323270779821444	0.432097610236136
AURKA	105.576937308676	0.999144080636891	0.177008919554954	5.64459736350572	1.65568263542291e-08	1.52812166784648e-07
AURKAIP1	1449.87468762774	0.0110866760951183	0.108019894189594	0.102635502268307	0.918252264883022	0.954038663720968
AURKAPS1	4.57573553371773	0.562039041336958	0.206413431944531	2.7228801732631	0.00647155259058847	0.014848274471867
AURKB	96.5252756693642	0.739771055645735	0.309649774759762	2.38905730262416	0.0168916675126797	0.0344414280680778
AURKC	21.5273306922776	0.946941223700891	0.223459938976724	4.23763305421616	2.25888556161736e-05	9.90694753802969e-05
AUTS2	1132.13406358835	0.0854072446464431	0.113885605656728	0.749938889589577	0.453291510861316	0.567212298637388
AVEN	136.155411904463	0.163960484113265	0.0817207313405448	2.00635115990351	0.0448187952481536	0.0807350204566298
AVIL	109.243398110769	1.53474506503693	0.245674354564066	6.24707071179751	4.18221755295285e-10	5.51428768980469e-09
AVL9	268.237817244064	-0.311620996194879	0.123407018870425	-2.52514807542734	0.0115649548514829	0.024729627265166
AVP	0.276334218393913	-0.413094475814964	2.2227475755465	-0.185848577841052	0.852563508475432	0.911112816267152
AVPI1	166.253165343442	-0.175449189751483	0.116277266104937	-1.50888643695101	0.131327806462546	0.203654840414026
AVPR1A	5.16802461273423	0.341589921664716	0.326520625170087	1.0461511320664	0.29549126088649	0.401386519536669
AVPR1B	0.103367715224576	0.205201636553389	1.67293716907483	0.122659499918261	0.902376735998363	0.943888484014366
AVPR2	1.05861425277612	1.43073358675873	0.423123906483565	3.38135842677635	0.000721283902804084	0.00214848572383741
AWAT1	0.0049629279255739	-0.0714045485683144	3.58413516627555	-0.0199223927825564	0.984105281831703	NA
AWAT2	0.72378291641401	-1.7969804317255	0.640573950612224	-2.80526616795461	0.00502750448036774	0.0118888456322315
AXIN1	854.44268621663	-0.187827332324413	0.0649647411778898	-2.89121958956311	0.003837498806364	0.00937777196244109
AXIN2	520.343093671228	-0.324685817732711	0.114752332073192	-2.82944853378333	0.00466282989212848	0.0111346903975171
AXL	1575.81719686869	0.398221324785996	0.130319025470545	3.05574204033625	0.00224504317317656	0.0058356172159595
AZGP1	480.358143858059	-0.474646151490621	0.306340178351377	-1.54940874567944	0.121283492723119	0.190331478319821
AZI1	466.243166496681	-0.0689075839225564	0.107729080881566	-0.639637722318558	0.522408152293609	0.633353121610784
AZI2	827.858813105444	0.0503166882542272	0.0504115879334842	0.998117502678507	0.318222383838907	0.426634317252649
AZIN1	4595.78540111021	-0.189005259434062	0.0757516340801779	-2.49506511283985	0.0125934018867761	0.0266369358490221
AZU1	2.42005417171159	-0.832590753436407	0.415566751835345	-2.00350665629356	0.045122933859369	0.0811892143272004
B2M	26553.6380364789	0.814862013308835	0.125061460167399	6.51569246207514	7.2355083474273e-11	1.11605934349153e-09
B3GALNT1	652.465524572037	0.298035067459658	0.114896682658835	2.59393970794283	0.00948831243354233	0.0207672240019888
B3GALNT2	345.69307130278	0.40235149811113	0.0866702513919195	4.64232526904431	3.44509947708913e-06	1.84263156730636e-05
B3GALT1	36.9435899458665	0.225712548760535	0.225209282925537	1.00223465848504	0.316230272325409	0.424449486516861
B3GALT2	280.362251794681	-0.631199844456279	0.158041675041414	-3.99388227371595	6.50001463016441e-05	0.000255903076509267
B3GALT4	129.877407981991	0.800456446451936	0.135888775873733	5.89052658179597	3.84966938912433e-09	4.09349634929815e-08
B3GALT5	13.2277218370267	0.313700066147581	0.209613796380963	1.49656211358076	0.134507234460105	0.207811292557477
B3GALT6	717.703948377979	-0.0172866129857068	0.0999824453504114	-0.172896481228499	0.862732797574466	0.917668045068238
B3GALTL	648.328862307554	0.317588514931916	0.121524226567914	2.61337614647917	0.00896525714804398	0.0197754953997824
B3GAT1	3454.48882585938	-0.332519199564641	0.111686356162117	-2.97725891497414	0.0029083828125954	0.00734089456780107
B3GAT2	760.117555219545	0.055161476657403	0.258605577654207	0.213303507054136	0.831090238266811	0.895053650184868
B3GAT3	1111.2934608282	0.0425693636017948	0.0900304102287786	0.472833162634944	0.636332212453571	0.737539148316122
B3GNT1	3695.51141233993	-0.366994595461211	0.0833321633537356	-4.40399697657386	1.06274424557617e-05	5.06269417368807e-05
B3GNT2	244.918818606493	0.154825327100844	0.08293688672997	1.86678489156377	0.0619316331805026	0.106806984468879
B3GNT3	0.144391818318862	0.598416863508447	1.57276041305184	0.380488253991119	0.703583014060599	0.794882498277821
B3GNT4	12.2711129742559	-0.921240344610046	0.338190598644836	-2.72402706728558	0.00644912208462713	0.0148058756742524
B3GNT5	313.259464608629	1.39680961316171	0.180113912159311	7.75514559878213	8.82421759242186e-15	3.57858313445056e-13
B3GNT6	0.412848407264146	-0.508357940909011	0.490275910921705	-1.03688133474335	0.29979116375692	0.40607918190787
B3GNT7	152.669646708119	1.42781041680617	0.281846066162598	5.06592281469864	4.06426584297245e-07	2.7127924771618e-06
B3GNT8	7.0983896040495	1.32780523793982	0.224998818057277	5.90138761351982	3.60456929222961e-09	3.85474944401906e-08
B3GNT9	492.007294903885	0.532412366331091	0.162670606200609	3.27294757649398	0.00106432215760768	0.00302780746203122
B3GNTL1	78.1990476253374	-0.0332985449422982	0.110558907113837	-0.301183738258306	0.763274389441438	0.842705301153493
B4GALNT1	573.113251635859	0.075337495568033	0.192167078113926	0.39204163536987	0.695027450621915	0.78830645407423
B4GALNT2	0.136928911030512	0.663495924474232	3.58413516627555	0.185120229481664	0.85313473499822	0.911515305367623
B4GALNT3	27.5007757975455	0.314462452661235	0.277184173677278	1.13448920437773	0.256589399612901	0.357192881428584
B4GALNT4	1587.9753274317	-0.283897806824708	0.1387086488265	-2.04672029629396	0.0406855552782589	0.0742822611277976
B4GALT1	583.581182302861	0.390619726735986	0.126717749974209	3.08259676971449	0.00205203000056897	0.00540287156979487
B4GALT2	1628.213314124	-0.0887145204631857	0.0826174162211774	-1.0737992607477	0.282912661355186	0.387616206446126
B4GALT3	633.721664039531	-0.121492071065402	0.0626511355893957	-1.93918386191176	0.0524789539696048	0.0924276820431016
B4GALT4	537.431865501409	0.399801504092938	0.0710472702906122	5.62726058942993	1.83094022379317e-08	1.66931854175128e-07
B4GALT5	2351.06068233353	0.322372547567297	0.105941602187722	3.04292686640771	0.00234289264910943	0.00606555709184943
B4GALT6	274.539090950142	-0.358106590592124	0.163517057159813	-2.19002590195914	0.0285223583677231	0.0545412233494244
B4GALT7	516.784031407525	0.233685906146181	0.0682824640002338	3.42234143960271	0.000620842968612997	0.00188069747129072
B9D1	199.181101575637	0.549794718429774	0.0961396671307971	5.71870836292561	1.07336837780223e-08	1.03237319951246e-07
B9D2	95.7409084371324	0.569843351413054	0.124163082895578	4.5894748916012	4.44362442720457e-06	2.31009287647349e-05
BAALC	11173.1850981035	-0.178657180023106	0.118857519775973	-1.50312054601043	0.132807961489931	0.205575839926912
BAAT	10.3568098108615	-0.414933418309473	0.223851416668132	-1.85361086601756	0.0637948519142492	0.109556401967495
BACE1	3381.22161087965	0.136077697761637	0.0764684728164486	1.77952681346562	0.0751534329193822	0.126160265135521
BACE2	196.144752342071	1.30607094913549	0.162195046895403	8.0524712322304	8.11388135270444e-16	4.07564828483299e-14
BACH1	722.526154655191	0.0604476556805397	0.0821066006206655	0.736209454825798	0.461603239183437	0.575999851468893
BACH2	229.295521561052	-0.100619356319404	0.107600240922576	-0.935122035570582	0.349725411659652	0.461115785563353
BAD	1400.68247738147	-0.0206596779085335	0.102647930315824	-0.201267359653219	0.840489523529003	0.902120286024255
BAG1	1397.40957704036	-0.209949533991667	0.08621705805945	-2.43512755732048	0.0148865408633694	0.030867001949545
BAG2	126.350811851107	-0.0289137435532643	0.115661932497976	-0.249984959863698	0.80259897973838	0.873460413823088
BAG3	1887.1320672656	-0.108738313219327	0.152068252828372	-0.715062553799785	0.474570391192855	0.588676767085281
BAG4	151.625376657236	-0.307043387839203	0.131143654839602	-2.34127520858511	0.0192179950109423	0.0386173696401774
BAG5	1075.6875010138	0.0848657176867179	0.0612420836007692	1.38574184118145	0.165825746961872	0.248246278683793
BAGE	0.00939327604181608	0.056050797355534	3.58413516627555	0.0156385835788049	0.987522724196495	NA
BAGE2	4.1250067603504	-0.369214639233546	0.231982065436701	-1.59156544510675	0.111482379471325	0.177266728488054
BAHCC1	969.450835366687	-0.378468339228301	0.103064287089933	-3.67215793088494	0.000240510966284218	0.000811053539291057
BAHD1	872.42381671877	-0.312599075342444	0.0572743443166176	-5.45792499368248	4.81731063610861e-08	3.99555439332789e-07
BAI1	2745.93947524283	-1.00443386337221	0.217899581932365	-4.60961812989612	4.03409263134607e-06	2.11420306408112e-05
BAI2	3378.74858789581	-0.247581762753837	0.11356537297244	-2.18008144801249	0.0292514246871901	0.0557362649180507
BAI3	935.098414195232	-0.793517391417292	0.114993847299557	-6.90052041958552	5.18123728129297e-12	1.02508618481843e-10
BAIAP2	1584.58896204441	-0.243049575552425	0.110520449887654	-2.19913668284457	0.0278682048729526	0.0534758998873043
BAIAP2L1	12.0202970079583	0.0768683164202744	0.1737557830292	0.442392852083413	0.658204950573768	0.756757974591932
BAIAP2L2	35.2207895320533	-0.579858222667158	0.179643561809261	-3.22782635139928	0.00124734668276453	0.0034808292297105
BAIAP3	2023.85969264953	0.479783481818656	0.21686115417514	2.21239937435349	0.026939082085511	0.0519163384030173
BAK1	235.871679881799	0.268399156530965	0.062078323911407	4.3235567524987	1.53533618484634e-05	6.99904106065231e-05
BAMBI	437.947910590425	0.0425123121006116	0.177060242660928	0.240100834957191	0.810252086940828	0.879162857291166
BANF1	2450.00056883401	0.0925937630866562	0.0853094018792962	1.08538755455895	0.277750042169013	0.381687310406237
BANF2	0.0893637887711308	0.0506274416608587	2.0800802372118	0.0243391772851615	0.980582063423658	0.990360926112104
BANK1	21.0286224244208	2.17738774697999	0.34517664609001	6.30803900450498	2.82593008502505e-10	3.83115962901804e-09
BANP	246.56439482934	-0.109673424956492	0.0676390760903942	-1.62145066573532	0.104921022271538	0.168276003533602
BAP1	2440.58907487935	-0.218557601991222	0.0567993989568428	-3.84788582282862	0.00011914155340873	0.000437007859175014
BARD1	104.79090210333	0.382597508081182	0.182208772529959	2.09977545410595	0.0357485984551158	0.0662957280664209
BARHL1	2.56868114364836	-0.4404880866757	0.566968075147215	-0.776918676702081	0.437206751483326	0.552099864918218
BARHL2	0.441274118874676	-0.993855727978433	1.36571050163212	-0.727720645620506	0.466784609536051	0.580992256976513
BARX1	2.26673128752387	1.27043272288895	0.610692885425911	2.08031361295936	0.0374967769946131	0.0692020896149596
BARX2	8.45431040508389	0.558792537635723	0.411033232336743	1.35948262494242	0.173993704620687	0.258315851804532
BASE	0	NA	NA	NA	NA	NA
BASP1	2303.28069172613	-0.621141798298026	0.159312840715314	-3.89888094085261	9.6638274022214e-05	0.00036379640387386
BAT1	5088.90409759711	-0.20501897315899	0.0617922179027538	-3.31787691261772	0.000907044459230582	0.00262948862573792
BAT2	9210.21611253907	-0.301026032977749	0.0584719125174379	-5.14821595561759	2.62975628308609e-07	1.82959946973268e-06
BAT2L1	7421.77844494434	-0.251388352831965	0.072112566465813	-3.48605472183746	0.00049020071810714	0.00153201011750715
BAT2L2	3173.07947120131	-0.0409599921815744	0.0708642352154808	-0.578006550935392	0.563259696434192	0.67193492130567
BAT3	4535.65831537029	-0.168236247164539	0.0541960186636051	-3.10421782472219	0.0019078281465932	0.00506591101963863
BAT4	602.349600456916	-0.15537631009004	0.0837913676336349	-1.85432359535411	0.0636928783924964	0.10943143233029
BAT5	1085.98575844195	0.0700204120227978	0.045959754771949	1.5235157883291	0.127629713757259	0.1988582384163
BATF	18.2333327492977	1.83527468104373	0.270276543016548	6.79035872133145	1.1185506721885e-11	2.06068489617736e-10
BATF2	122.616546352365	1.25814613297944	0.191979384368005	6.55354811726917	5.61858174669111e-11	8.90607001742849e-10
BATF3	81.1120437378228	0.851227504447089	0.19832714000046	4.29203741074022	1.77041110477938e-05	7.96791315377048e-05
BAX	744.711894506872	0.516988762666255	0.0943407502946835	5.48001538096087	4.25288862786307e-08	3.56519558530839e-07
BAZ1A	559.376870574128	-0.193449385338264	0.115762275188685	-1.67109176994798	0.0947035527357045	0.153998070131588
BAZ1B	2589.64108940157	0.164902765743673	0.066567687455449	2.47721938446541	0.0132410485048948	0.0278464793790222
BAZ2A	1739.49282979184	-0.366370295973813	0.0677413785228287	-5.40836788330705	6.36016784448625e-08	5.13195972154584e-07
BAZ2B	1117.67470716163	-0.22433943732862	0.0881158951954739	-2.54595878338354	0.0108978054884897	0.0234475520937462
BBC3	125.96491746835	0.159968233697742	0.118084371708152	1.35469437135261	0.175514951943468	0.260285589647999
BBOX1	1212.6538922812	0.122120366022224	0.161656937989924	0.755429167103463	0.449991518073719	0.564062426080765
BBS1	1380.65259716167	-0.0619741920365621	0.082394216859596	-0.752166770905406	0.451950773903157	0.565900655722582
BBS10	624.789641474127	-0.291608033239276	0.0799561499169603	-3.64709948568221	0.000265217257099268	0.000882857438790866
BBS12	123.862411422856	0.513444613409964	0.0840088460402589	6.11179224106839	9.85183890177289e-10	1.19781994590277e-08
BBS2	2819.45631169845	-0.221497942957159	0.0744337547939369	-2.97577280053056	0.00292251289857714	0.007374572615184
BBS4	494.5875253567	0.208939823232908	0.064962951020864	3.21629205492532	0.00129858604733976	0.00360342242046176
BBS5	342.138864270443	0.34904693035593	0.0837682292231427	4.16681758219019	3.08881472136628e-05	0.000130961829869922
BBS7	290.235629359124	0.0432220371170772	0.0748127721121927	0.577736072288024	0.563442321307522	0.672013198295101
BBS9	410.647235352637	0.309913716825147	0.0610052159540261	5.08011834690824	3.77199808779681e-07	2.54216389111371e-06
BBX	1999.25027361775	0.0399522121252515	0.0897354575353221	0.445222136517501	0.656159230865724	0.755193768014019
BCAM	775.745000910049	0.535053573386911	0.146883708711773	3.64270195843731	0.000269791154121538	0.000896083507112415
BCAN	70896.2274966923	-0.968598912625186	0.156780348384344	-6.17806327519239	6.48927082828429e-10	8.20397963824119e-09
BCAP29	1591.48576304474	0.420772685711316	0.0803486946895054	5.23683287373024	1.63355487071549e-07	1.19090599446402e-06
BCAP31	3381.91935112437	0.239512125558206	0.069407066467637	3.45083199374065	0.000558861343940312	0.00171821892682404
BCAR1	2139.69186373365	-0.481534960425115	0.0996822315550236	-4.83070004466456	1.36053840932103e-06	8.02109743141559e-06
BCAR3	423.247994925729	0.407762194157665	0.153241681241974	2.66090916552784	0.00779299775144058	0.017481993040109
BCAR4	0.087947076006819	-0.0741167421087046	1.57456379259139	-0.04707128568397	0.962456412665527	0.979978443981376
BCAS1	2588.01990961705	0.513443716696577	0.222739864552557	2.30512718380246	0.0211594514556027	0.0420495844794413
BCAS2	723.42059263187	0.178643991783004	0.0447138441682375	3.99527249571406	6.4619884634383e-05	0.0002546200123049
BCAS3	785.189136262484	0.0258841243467243	0.0641247913982743	0.403652375037915	0.686468365528248	0.781294575175388
BCAS4	550.0548780154	0.802904753159379	0.126149036599756	6.36473154929295	1.95631589906009e-10	2.74558312245617e-09
BCAT1	874.767871604181	1.58281579855803	0.25768812347402	6.14236999835038	8.12992097965186e-10	1.0067561102099e-08
BCAT2	344.207036951393	0.0912111336974933	0.110315965645685	0.826817162535176	0.408340700856966	0.522551148914427
BCCIP	1033.91840741672	-0.374798170034885	0.0750280751563069	-4.99543896406863	5.87020881946343e-07	3.78322652248654e-06
BCDIN3D	198.179277059209	-0.135503846523739	0.0591800188010824	-2.28968914287098	0.022039343240771	0.043603921326197
BCHE	1649.18455836705	-0.147413220068609	0.12512352798312	-1.17814149300919	0.238740202593906	0.336394407445246
BCKDHA	1178.01697516377	-0.343620376346266	0.0857764317512174	-4.00599989217189	6.1755676898093e-05	0.00024436206174502
BCKDHB	660.981169088327	0.315653134182124	0.109442459308573	2.88419262666733	0.00392418636148372	0.00955595992575499
BCKDK	943.445728986428	0.0783435359359878	0.0575844484698009	1.36049815562744	0.173672336149459	0.257935105788719
BCL10	230.516298896576	0.247588987889275	0.0567967869008392	4.35920764886819	1.30534209208049e-05	6.06268949856722e-05
BCL11A	118.727798492075	-0.164736975386573	0.279442713006532	-0.589519667964013	0.555512722406659	0.664586320606038
BCL11B	107.253513413481	-0.350515151336312	0.192352196431366	-1.82225707758623	0.0684159876499195	0.116372396242296
BCL2	757.229321927676	0.0942170852251187	0.108986603400711	0.86448317761322	0.38732251760231	0.500819509302752
BCL2A1	59.9962106691709	1.09175985689852	0.290897345957705	3.75307603204211	0.000174677845533307	0.000612189321719425
BCL2L1	2770.04957284665	0.204910366822629	0.0784813574123749	2.61094320458732	0.0090292887958124	0.0198909764701165
BCL2L10	0.473338800573483	-0.380553854269819	0.555069287245331	-0.685597029081561	0.492967255505901	0.605932854369781
BCL2L11	463.987046554067	-0.375549501760505	0.104021284235102	-3.61031402873007	0.000305826513233359	0.00100580596167028
BCL2L12	76.3464431492141	0.982443684395208	0.123392109275009	7.96196523560184	1.69328056227752e-15	7.9313261537079e-14
BCL2L13	1327.06436045675	0.00548956106525831	0.0614337470404241	0.0893574188409201	0.928797862887775	0.960508947927058
BCL2L14	2.49248801230192	1.31538703964472	0.299307937121371	4.39476163677986	1.10894368225417e-05	5.2507376372793e-05
BCL2L15	11.7259089948141	-0.242197074958452	0.153181302523804	-1.58111382373717	0.113852014514433	0.180574904253146
BCL2L2	1563.01997710291	-0.263063732622384	0.100706437973351	-2.61218386745043	0.0089965854283827	0.0198305911277857
BCL3	146.993115703549	0.705400159572942	0.139973367058041	5.03953126511877	4.6667339115372e-07	3.07439966830383e-06
BCL6	2873.06578203332	-0.549609319469127	0.106989575384141	-5.13703617848544	2.79105240066283e-07	1.93320361474376e-06
BCL6B	148.669733962851	0.247985522044304	0.165248724897067	1.50068039677022	0.133438245751427	0.206380961895224
BCL7A	1083.92531441418	-0.982353665187989	0.129543701410688	-7.5831835472546	3.37177307119984e-14	1.14652523161525e-12
BCL7B	1038.24659878853	0.220771781520948	0.0633558206908191	3.48463296842653	0.000492812531880092	0.00153888926621757
BCL7C	634.243224637919	0.140963831032903	0.125768063171926	1.12082374076322	0.262362896519341	0.363896928271254
BCL8	2.19670342990649	-0.427639385775367	0.324479013424402	-1.31792617729652	0.18752836170725	0.274773706494646
BCL9	864.097143633095	-0.0291409946465599	0.0740690504951877	-0.393430109495641	0.694001834794309	0.787476888124163
BCL9L	1407.27313277338	-0.427894936925366	0.0849216338857727	-5.0387035357907	4.68695819088107e-07	3.08555336136148e-06
BCLAF1	2980.98571283172	-0.0552675816948428	0.0600630420707971	-0.920159548856984	0.357489389486538	0.469173522094409
BCMO1	52.149747536047	0.698223171789407	0.204232201216466	3.41877122035893	0.000629045918342362	0.00190185643473657
BCO2	64.2546466998086	1.1419777873814	0.1955585656857	5.83956925321685	5.2335958380834e-09	5.39959535365257e-08
BCOR	639.58425319791	-0.23122262406737	0.10320893226254	-2.24033539538219	0.0250691570031147	0.0487742186511274
BCORL1	342.562999134563	-0.141369055256578	0.0909806350063948	-1.55383676148931	0.12022335927164	0.188905137480162
BCORL2	1.2997959109138	-0.448217791634772	0.535290278522699	-0.837335945782108	0.402403759529483	0.516576693288414
BCR	4494.29257199547	-0.993491094767901	0.112655049207913	-8.81887764244227	1.15612690009915e-18	1.20339964445876e-16
BCS1L	436.89309038707	-0.133830436195686	0.068870638682265	-1.94321468126808	0.0519902249597003	0.0916962115075727
BCYRN1	0	NA	NA	NA	NA	NA
BDH1	289.27989768344	0.435283780608525	0.199717307447267	2.17949954449219	0.0292945784690341	0.0557901221992095
BDH2	1220.31937530298	0.266153789594285	0.116515392407689	2.28428007745971	0.0223550759837591	0.044158640340718
BDKRB1	1.18377992370202	1.42568075265115	0.416361927282613	3.42413813375268	0.000616752627196654	0.00187012092946375
BDKRB2	43.2829561007508	1.30806021394969	0.275454061638138	4.74874179081114	2.04686072209333e-06	1.15303615421349e-05
BDNF	62.5229669280347	0.192779740040458	0.340256680306032	0.566571506743288	0.571005338020914	0.678657448183193
BDNFOS	260.484990890085	-0.226145993924111	0.109381007808875	-2.06750695074289	0.0386864099261404	0.0710895033715346
BDP1	726.039999233271	-0.291513138730632	0.0856728079749954	-3.40263317639493	0.000667398200157148	0.00200358479060156
BEAN	48.8632283676597	0.441920042715224	0.228593542239034	1.93321315373433	0.0532099450236221	0.0935304934761782
BECN1	1359.94074364267	0.168803309599279	0.0419249600643811	4.02632010477912	5.66565479825074e-05	0.000226288015988117
BEGAIN	166.874035489797	-0.339856400216529	0.245462240782277	-1.3845567413278	0.166188046649709	0.248717888172293
BEND2	0.118950531547124	0.687907015128524	1.92091011070982	0.358115151403064	0.720257140812048	0.808310140176971
BEND3	124.840864039381	-0.194385216417084	0.104862722905522	-1.85371131924753	0.0637804714423093	0.109551788865338
BEND4	26.4053407920004	-1.4973963063879	0.282197316469192	-5.30620320959492	1.11932171071525e-07	8.51466162077179e-07
BEND5	249.279158767679	-0.337645448957802	0.0895765102462	-3.76935256832163	0.000163671553481391	0.00057739601318534
BEND6	470.056623272556	0.202280464772403	0.101069943326167	2.00139089936575	0.0453502806509125	0.0815512869061807
BEND7	368.314371655344	-0.67918610524609	0.109828506851789	-6.18406026554322	6.24734994127584e-10	7.93561684744028e-09
BEST1	414.370480450455	0.180947421998837	0.165967073632912	1.09026096585313	0.275598204555121	0.379258755824072
BEST2	0.360322127918864	0.27840365756315	0.516287412739787	0.539241613669687	0.589720150007229	0.695778288101278
BEST3	606.14992560575	-0.677205675973889	0.219204275931247	-3.08938168791148	0.00200573575110732	0.00529960020205145
BEST4	14.3779391938481	1.83956661594187	0.257830588828213	7.13478809594438	9.69363798190312e-13	2.27025001536171e-11
BET1	339.819739656481	0.488070829149014	0.0632699698655559	7.71409928258428	1.21839603897453e-14	4.72626670522292e-13
BET1L	928.431789252126	0.240077246554662	0.0611840211616212	3.92385531379972	8.71430836710414e-05	0.000332393359106044
BET3L	0.19324582598564	0.57129918820693	0.875392530943616	0.652620587921977	0.514000909503014	0.625507991715282
BEX1	2640.28807022478	-0.835070871499979	0.122767764334103	-6.80203696816863	1.03150118852612e-11	1.91348576913123e-10
BEX2	873.219004008368	-0.565841136513043	0.170422628629585	-3.32022303060999	0.000899455595223742	0.00261274419102512
BEX4	2644.97846248457	-0.362325402459107	0.0724716515296093	-4.99954664771333	5.74652688065105e-07	3.71393334376951e-06
BEX5	164.187525583187	-0.572397993338868	0.252912408069278	-2.26322622013103	0.023621747693214	0.0463436223444582
BEYLA	0	NA	NA	NA	NA	NA
BFAR	783.983650069885	0.136878031263864	0.0446121253065387	3.06818001436489	0.00215366839757312	0.00562385102396236
BFSP1	16.459086596705	0.396730417981002	0.213095601392577	1.86174850812675	0.0626385476140393	0.107877178793698
BFSP2	0.170109127606581	-0.169030887423201	1.11021516964519	-0.152250565516251	0.878989313274643	0.928863156994569
BGLAP	60.2881193772669	-0.168975634635446	0.130074563391312	-1.29906747506894	0.193920773901514	0.282791066299717
BGN	2395.43525236817	1.417580103047	0.191258083889905	7.41187025518362	1.24530561205247e-13	3.56759112345796e-12
BHLHA15	0.904688468228021	0.509942978514131	0.544996364227335	0.935681431998357	0.349437233517263	0.460800676180986
BHLHB9	285.770658563578	0.0131627095881133	0.125908321862268	0.104542014327791	0.916739228308748	0.952900204249249
BHLHE22	23.4138905120169	-1.02472906807452	0.360091498199235	-2.84574635391016	0.00443074720715603	0.0106551764437525
BHLHE23	0.0403872967167414	0.118422711734739	3.58413516627555	0.0330408051708044	0.973642047571583	NA
BHLHE40	1362.29752241365	0.788798692782897	0.180261688818235	4.37585322735035	1.20958388506763e-05	5.67361891374236e-05
BHLHE41	2428.38474165758	0.690816157906578	0.143641113548265	4.80932054090805	1.51444189104474e-06	8.79832039398892e-06
BHMT	2.72876063921394	-1.10304975710132	0.361887690147218	-3.04804442685683	0.00230335871497993	0.00597476517843888
BHMT2	47.7576442996407	0.926214936575973	0.244346148841665	3.79058536820301	0.000150292665089267	0.000535746456071634
BICC1	25.1036098814354	1.04668886864892	0.256224945230262	4.08503890090909	4.40694327726841e-05	0.000180675031166085
BICD1	241.746157635237	0.701119083042741	0.160095816205995	4.37937167665027	1.19021983139129e-05	5.59176498519236e-05
BICD2	1134.01068800068	-0.238021258353453	0.0606184112018372	-3.92655059138599	8.61727736243234e-05	0.000329227790910547
BID	1118.72888378997	-0.587414757336093	0.10296426355967	-5.70503529115883	1.16318986093327e-08	1.10908525366136e-07
BIK	2.19472686096016	0.912105435528108	0.296605471501075	3.07514703256174	0.00210398802618277	0.00551333142077767
BIN1	4012.8639377579	0.15335295717439	0.136765502883946	1.12128390522952	0.262167034236519	0.363687365130714
BIN2	272.173303315941	0.730899288852313	0.140110127644928	5.21660568823821	1.82231616220995e-07	1.31470603061862e-06
BIN3	353.167622951547	0.259885857989248	0.0738874816486275	3.51731920198792	0.000435929210145164	0.00137895824434911
BIRC2	1152.10503311528	0.0381048331986898	0.0534569422112579	0.712813558398127	0.475961134556823	0.589866901511882
BIRC3	59.2864134169519	1.27305350036664	0.226560932601006	5.61903363369623	1.9202847582149e-08	1.74398716577384e-07
BIRC5	164.506656547935	0.736613322956788	0.305678144006052	2.40976771614461	0.0159626799144224	0.0327909451650992
BIRC6	1706.4038394941	-0.278465260422423	0.0903931813086683	-3.08060028854985	0.00206583770603327	0.00543006948095389
BIRC7	12.2356332316909	0.500592919985232	0.290794735729172	1.7214648632823	0.0851665028466582	0.140535634274373
BIRC8	0.00558645259618473	-0.0198803407527118	3.58413516627555	-0.00554676088663544	0.995574347819779	NA
BIVM	713.329615520226	-0.456890423616042	0.0904557663470281	-5.05098173468798	4.39545104747692e-07	2.91618876860933e-06
BLCAP	2352.34989265367	-0.128069870619015	0.0679696819674691	-1.88422053644904	0.0595351507997696	0.103225114323939
BLID	0.0104480199567718	0.0180851113088443	3.58413516627555	0.0050458787043005	0.99597398837047	NA
BLK	1.35644565779463	-0.999988111389512	0.55286434027931	-1.80874047851289	0.070491331207957	0.119425407497268
BLM	321.229479530059	0.636284591997007	0.23996191290244	2.65160659998447	0.00801098204636757	0.0179195032976054
BLMH	823.933602021301	-0.0104173041292963	0.0637372390379361	-0.163441408610373	0.870170901839041	0.922980186642678
BLNK	178.428261354754	0.790265823083449	0.172684663491328	4.57635210392111	4.73153931300094e-06	2.44687056495682e-05
BLOC1S1	1489.5391419364	0.149066513628523	0.108138536835605	1.37847725695732	0.168055984973496	0.250852209565283
BLOC1S2	974.732394705015	-0.149530123992123	0.0671026995793562	-2.22837717304185	0.0258553739867573	0.0501165204858146
BLOC1S3	305.449727969128	0.0401712186440626	0.0636004779679853	0.6316181879055	0.527636398919081	0.638369854717029
BLVRA	768.914565853908	0.148379807476041	0.0746879876724173	1.98666227461955	0.0469598350902266	0.0840664504347875
BLVRB	639.772507050972	0.238230812750413	0.126589584189887	1.88191480582685	0.0598475838360263	0.103661304497716
BLZF1	302.017973006006	0.225289216975507	0.0578618275190029	3.89357244033673	9.87786869581345e-05	0.000370588201611455
BMF	303.475071368369	0.164737877326111	0.158613581392022	1.03861142205063	0.298985491495017	0.405163617000625
BMI1	1520.95023838628	-0.105229953111241	0.0697706863533913	-1.50822585545808	0.131496732056322	0.203836793234631
BMP1	675.876296461096	0.45153834673073	0.0951329137781435	4.74639458414727	2.07074566532103e-06	1.16474004159276e-05
BMP10	0	NA	NA	NA	NA	NA
BMP15	0.0351955565921729	-0.046998142228162	3.30798039698775	-0.0142075032460768	0.988664433866967	NA
BMP2	936.836945734137	-1.37237051047133	0.215453251255719	-6.3696904199532	1.89410126446184e-10	2.66826175119978e-09
BMP2K	507.542384290134	0.458194990141255	0.137560297347505	3.33086652890667	0.000865761029056712	0.00252622623273735
BMP3	3.12774819189897	0.0219690986184133	0.45049270018549	0.0487668248772236	0.961105120616263	0.979404458220425
BMP4	113.2549353151	-0.600054263279181	0.161686636888785	-3.71121741923498	0.000206264842184426	0.000709357210566703
BMP5	1.55525169286386	3.58064101805398	1.00411023262324	3.56598399430663	0.00036249349586412	0.00116976888365659
BMP6	108.760399786925	0.300091878292176	0.199256472393141	1.50605837134406	0.132052189835275	0.204558067693569
BMP7	2370.10428640612	0.0125298602765526	0.123405543852607	0.101534014480889	0.919126557417535	0.954375702714195
BMP8A	163.14645790971	0.151704982512339	0.164106391010405	0.924430679258071	0.355262127731906	0.466740847429002
BMP8B	174.899700896495	-0.184498244073848	0.206320025180803	-0.894233334414182	0.37119706038291	0.483673977559928
BMPER	144.914251574442	0.00757634211317026	0.218119906261019	0.0347347577900745	0.972291244932604	0.985760214559376
BMPR1A	743.046486623403	-0.288610111850591	0.101172693978818	-2.85264828384442	0.00433565790749547	0.0104546829542902
BMPR1B	1105.19621769761	-0.100646493102334	0.134228276934918	-0.749815876360638	0.453365605450137	0.567267128603831
BMPR2	2660.11773679359	-0.315299362841849	0.0793381525970612	-3.97412030052143	7.06398545402721e-05	0.000275558674717164
BMS1	811.946581945942	-0.123397014584977	0.0560952390098683	-2.19977696437427	0.0278227231058226	0.0533940940398128
BMS1P4	14.8808542921741	-0.444530773791462	0.155018665564723	-2.86759515166813	0.00413604412512163	0.0100249576621318
BMS1P5	57.6015455715871	-0.794543550570235	0.128640059603488	-6.17648618182615	6.55439432414835e-10	8.26400619496928e-09
BMX	2.17669119976556	-0.0176092203018269	0.334485707413849	-0.0526456584288056	0.958014237222479	0.977923476103252
BNC1	1.22498500996051	-0.182663680036441	0.531847053760588	-0.343451521908153	0.731258805095291	0.816353749166738
BNC2	79.3810703647306	1.21492941006696	0.197791656896424	6.14247046175041	8.1247790179801e-10	1.0067561102099e-08
BNIP1	211.279522733275	-0.0184279076866118	0.0650959695864475	-0.28308830490864	0.777109146401306	0.853357215548951
BNIP2	517.059297175518	0.21078207391245	0.0611788047205667	3.44534475420358	0.000570331472998499	0.00174803377688531
BNIP3	1482.33892038476	-0.330157897535224	0.0942122480761051	-3.50440525809893	0.000457628368559502	0.00144024941143299
BNIP3L	3331.28172792125	0.000218099605804295	0.0644433915321631	0.00338435952265864	0.997299676943532	0.998792321317833
BNIPL	6.5830012365182	0.105608210360915	0.185299388140144	0.56993286065814	0.568723236130361	0.676460040130678
BOC	968.028265929145	0.0660550345362351	0.135324434288212	0.488123485486382	0.625462376820886	0.727641297244094
BOD1	754.098551186695	0.18158380636811	0.0575795136973546	3.15361826990304	0.00161259870418261	0.00436298185148957
BOD1L	1340.45192424842	-0.15847452407324	0.0810580734574313	-1.95507390335973	0.0505743479771565	0.0895530652773843
BOK	726.157139098092	0.551650864304652	0.239950189278465	2.29902241779212	0.0215036663611964	0.0426669900840398
BOLA1	292.110788697622	0.132234406529798	0.0875592650503636	1.51022746083739	0.130985393895068	0.203191119392117
BOLA2	746.956652903234	0.0554226514105737	0.0827943742406155	0.669401175127013	0.503239602209518	0.615610941955963
BOLA3	170.522122806683	0.52869642294872	0.0743478703652595	7.11111724318823	1.15107301552256e-12	2.64944766816101e-11
BOLL	0.0344237008091035	0.0668982699387305	3.58413516627555	0.0186651079926341	0.985108263191386	NA
BOP1	527.618595357376	-0.300672218129587	0.160224218752151	-1.87657159742307	0.0605768331949184	0.104730787740149
BPESC1	0	NA	NA	NA	NA	NA
BPGM	735.7812000882	0.171674139250429	0.0784472485311106	2.18840230173715	0.0286403107725	0.0547444258960988
BPHL	319.20535350287	-0.0491243127367256	0.0836999987967806	-0.586909360130303	0.55726458307604	0.666086713142755
BPI	1.84571635808038	-0.346559121205819	0.35781730457165	-0.968536503902994	0.332776497291776	0.44251865066071
BPIL1	5.89320324138211	1.01440805284724	0.501886419274485	2.02119048033547	0.0432600507858201	0.078296011545897
BPIL2	0.130413624680874	-0.318181716953228	1.67022474410069	-0.190502336932236	0.848915512112333	0.908665507023348
BPIL3	0.0515341726217769	0.207911669661225	3.58413516627555	0.058008880808275	0.953741554578734	0.975278863703755
BPNT1	535.297778583869	-0.0693539847268384	0.0499816368391672	-1.38758930504834	0.165262139980216	0.247589273522255
BPTF	2173.02373528627	-0.236837060822176	0.0790780858914642	-2.99497715646833	0.00274465396012129	0.0069802954522645
BPY2	0	NA	NA	NA	NA	NA
BRAF	106.198796767051	-0.0895002144490654	0.128653003096646	-0.695671397439758	0.486634641923342	0.60013203381215
BRAP	658.781643360001	-0.0806459198865172	0.044467675783811	-1.8135852271343	0.0697416065048779	0.118380027131309
BRCA1	272.361179142048	0.870135681784022	0.114451518639472	7.60265737080339	2.90110854391419e-14	1.00286290920251e-12
BRCA2	58.8097876781492	0.888977322350831	0.225312846514088	3.94552435027377	7.96255392449267e-05	0.000306589417035131
BRCC3	305.169386836088	0.12385982639851	0.0617654868532291	2.00532421435993	0.0449283977882624	0.0808780227671872
BRD1	805.731729510574	-0.259322318605681	0.0605867673303053	-4.28018080568509	1.8674154055226e-05	8.34370657857414e-05
BRD2	4596.27119734508	-0.138746907864935	0.0484470512308303	-2.86388757086294	0.00418476516038093	0.0101247107495993
BRD3	1671.15623128647	-0.375349035108788	0.085963178361888	-4.36639317276803	1.26315021867064e-05	5.89449128194597e-05
BRD4	1722.50869942499	-0.00880500808067543	0.0649755499009624	-0.135512636585551	0.892206573864716	0.937384756795229
BRD7	1596.61955031236	-0.182905611859804	0.0558895177568778	-3.27262819936026	0.00106552538934443	0.0030303102147476
BRD7P3	0.71658124055859	-0.782722466144409	0.339401229234608	-2.30618630318324	0.0211002245805919	0.0419630408387612
BRD8	1453.49874610688	-0.284278076995966	0.059883793251415	-4.74716215458261	2.06290563847453e-06	1.16102733681162e-05
BRD9	917.913105282526	-0.187817509627774	0.0556581864593573	-3.37448130411008	0.000739549392667655	0.00219625890331609
BRDT	0.0683641815163209	-0.239538118589809	2.77013325206183	-0.08647169532784	0.931091455630263	0.961789034771673
BRE	575.645894530943	0.065096501246303	0.0562685183147052	1.15689026823531	0.247317195232886	0.346136921631685
BREA2	8.09415528292163	-0.353846365149154	0.180672520688075	-1.95849575686199	0.0501718684485889	0.0889412552987758
BRF1	1156.5200302399	-0.160049588154674	0.0701929536002396	-2.28013753440527	0.0225995327045542	0.0445804216416644
BRF2	350.956559070762	-0.0221581948022061	0.0558784223820833	-0.396542956254091	0.69170452498566	0.78553618500008
BRI3	1074.86683426493	0.306876106118147	0.0999007088223351	3.07181109859691	0.00212764324475539	0.00556505517084637
BRI3BP	58.2913613591946	0.19804718475645	0.117324571452889	1.68802819651444	0.0914058164404501	0.149309448720861
BRIP1	41.5538604116217	1.12588959969164	0.276339063220776	4.07430490126592	4.61519843402808e-05	0.000188552895464348
BRIX1	436.290559701577	0.0874659233065413	0.0646930680386037	1.35201383947888	0.17637088806001	0.26130673404178
BRMS1	742.063455414883	0.120598859658598	0.0861837550389796	1.39932240831294	0.161716322896745	0.243093471260704
BRMS1L	404.047671053551	-0.43010933005702	0.0734937975936317	-5.85232147663967	4.84758467163303e-09	5.03460900264503e-08
BRP44	768.970631040173	0.164796147044597	0.0617643541346345	2.66814328998524	0.00762717216440641	0.017159305676311
BRP44L	1278.30333928685	0.0844445766597376	0.0922848983038042	0.915042203132129	0.360169474948076	0.472095654304404
BRPF1	580.228760642519	-0.11969463932459	0.0501722458916366	-2.38567433443402	0.0170478401240159	0.0347069795244552
BRPF3	934.517313721331	-0.358292824744829	0.0820739971239593	-4.36548526086389	1.26840855233779e-05	5.9175354048018e-05
BRS3	0.147479389508702	-0.038862928154124	1.14745520642056	-0.0338687976111549	0.972981774805698	0.986140134845806
BRSK1	1200.7909933547	-0.385522647597352	0.128695351358099	-2.99562216916928	0.00273885563700131	0.00696933304561409
BRSK2	684.401018349899	-0.972461807475019	0.145787215424005	-6.67041897087292	2.55074176746622e-11	4.36843672351435e-10
BRWD1	1667.06983351927	-0.370956760305801	0.0616627997246959	-6.01589227154785	1.78898520064765e-09	2.06648746728326e-08
BRWD3	177.157454170417	-0.572498568988688	0.153535728833913	-3.72876445982151	0.000192420901575879	0.000667382082918487
BSCL2	2373.86452313646	0.041748038825069	0.1654537663976	0.252324499671678	0.800790252650851	0.871897150956901
BSDC1	2609.52609707775	-0.154564247211635	0.0431109095397955	-3.58526992034248	0.000336729755292103	0.00109644919971374
BSG	11147.9611566694	0.109649204915772	0.0811071566773749	1.35190542250088	0.176405572664929	0.26133745627027
BSN	1157.8304608449	-1.24598259054798	0.188146897419458	-6.62239243717192	3.53431230622765e-11	5.80867327802467e-10
BSND	0.0301114771216367	0.118422711739466	3.58413516627555	0.0330408051721234	0.973642047570531	NA
BSPH1	0.0105203863933874	0	3.58413516627555	0	1	NA
BSPRY	26.1110183665454	0.208269320532539	0.255178274427801	0.816171835159367	0.414401863021864	0.528696631115501
BST1	43.5207609556029	0.914217792670004	0.182182820655225	5.01813392383539	5.21758011663149e-07	3.38800045438179e-06
BST2	1153.80182423402	1.06585209148022	0.186713749662922	5.70848206628823	1.13988185841083e-08	1.09074701221579e-07
BSX	0	NA	NA	NA	NA	NA
BTAF1	793.607439632794	-0.615781060500807	0.10108765180225	-6.09155568976331	1.11818672648146e-09	1.34297092995876e-08
BTBD1	2223.23239319102	-0.0551759359408426	0.056009034581869	-0.985125638260936	0.324562361265614	0.433335737238833
BTBD10	588.591366510194	0.00744237959707053	0.0679831593336545	0.109473870735311	0.912826645323076	0.950045551981621
BTBD11	284.193437109664	0.391825889918358	0.284158545435668	1.37889884436738	0.16792594454143	0.250718025095883
BTBD12	353.962923482696	-0.0575898963805666	0.072189839247298	-0.797756262945579	0.425011946843849	0.539521295322274
BTBD16	5.97666972662781	1.02599183122538	0.328782806854745	3.12057628876763	0.00180497538096335	0.00481669544761848
BTBD17	487.674167818923	-0.864856386865938	0.201605416937561	-4.28984696940852	1.78796275892709e-05	8.04304207713276e-05
BTBD18	3.58768828829059	-0.514003671632005	0.156889234731895	-3.27622014671928	0.00105206519429104	0.0029961230400117
BTBD19	20.6520086581275	0.811229658154535	0.200576352921977	4.04449301394018	5.24364718621558e-05	0.000211031916291184
BTBD2	2958.3865554814	-0.195753108178773	0.0724842569893419	-2.70062929951198	0.00692084296481809	0.0157327000471769
BTBD3	1657.02781401923	0.128761438060188	0.0931100784802421	1.3828947431025	0.166697142441754	0.249280681681596
BTBD6	832.015991898221	0.107608487164747	0.100870905532016	1.06679410279105	0.286064822136786	0.391046863639615
BTBD7	668.410697695324	-0.153958881334136	0.0721240546370597	-2.13463985225017	0.0327904395450402	0.0615716251068223
BTBD8	14.7975743873414	-0.345067870598477	0.22655987848587	-1.5230758107067	0.127739739842806	0.198989120561876
BTBD9	715.509897265728	-0.339209355525424	0.0772050345498677	-4.3936170419861	1.11480125797836e-05	5.27314222910442e-05
BTC	5.75952868971129	0.15199943824234	0.390408657305511	0.389334189695988	0.6970289478223	0.789954897556171
BTD	355.073675506628	0.283325322120283	0.0917740875643417	3.08720391168854	0.00202048944787591	0.00532956360627946
BTF3	5495.63690329132	-0.217688360730579	0.0715975791523241	-3.04044303324064	0.00236230375516497	0.00610990104317654
BTF3L1	0	NA	NA	NA	NA	NA
BTF3L4	1264.74084586457	-0.168696804527874	0.0687040237979079	-2.45541374729512	0.0140722518303846	0.0294063919578504
BTG1	1894.51312004365	0.03795185132567	0.0823081958930414	0.461094437970527	0.644730852044091	0.745245064093903
BTG2	3805.22904543717	0.00702921261458954	0.146547376586269	0.0479654619436439	0.96174376828539	0.979625488887412
BTG3	575.469252002649	0.402649698121673	0.0959549282861261	4.19623780991237	2.71385295476415e-05	0.000116674504269071
BTG4	0.208822194582243	0.961802600613055	1.37674411654193	0.698606653957517	0.484797884216727	0.59848278043649
BTK	240.272738504151	0.781421004067464	0.148239174164792	5.27135292320764	1.35421783218013e-07	1.00685021046535e-06
BTLA	4.03217789943804	1.52651372976632	0.259656282904953	5.87897859696733	4.12805737455282e-09	4.35001591505184e-08
BTN1A1	1.00263484014171	1.4544798378435	0.559531182360918	2.59946162733304	0.0093370116863404	0.0204917712258725
BTN2A1	545.924341172747	0.0260605705654068	0.0613837633258932	0.424551528830978	0.671163634077438	0.767559167922534
BTN2A2	291.586505611035	0.846603488314371	0.126892218203543	6.67183141960971	2.52630674397455e-11	4.33054740668866e-10
BTN2A3	15.2049717451889	0.642671252362089	0.155353803831645	4.13682340896233	3.52146905666727e-05	0.00014770146461992
BTN3A1	693.157441666661	0.641418291198601	0.127031595564585	5.04928154564896	4.43474740781906e-07	2.94121867019108e-06
BTN3A2	1137.46376954698	0.872047197178583	0.160505818501919	5.43311890695202	5.53774788657177e-08	4.51698930791505e-07
BTN3A3	589.36343302103	0.939442456301999	0.1498958761392	6.2673002119791	3.67361492454812e-10	4.8953662323139e-09
BTNL2	0.553541155926851	-0.353378211219645	0.74371980267397	-0.47514965979003	0.634680304851125	0.73615596292076
BTNL3	0.78025287467341	0.972070409292049	0.57875142604323	1.67959916045104	0.093035331152526	0.151667098622964
BTNL8	1.81851191526319	0.135558020946503	0.312764674187578	0.433418579955112	0.664710704848016	0.762273213736836
BTNL9	173.985974754711	-0.539884516134972	0.196922095080803	-2.74161472796356	0.00611380056892302	0.0141382581411185
BTRC	1006.76037330477	-0.566406784506043	0.0746992908481584	-7.5824921237523	3.38979669796409e-14	1.15056577777274e-12
BUB1	155.990128870823	1.02489987620401	0.263740157418628	3.88602132582037	0.00010190055880238	0.000380623777855143
BUB1B	148.710144821917	0.862552373134989	0.277103517325923	3.11274422446422	0.00185356581762341	0.004934414486927
BUB3	1294.11689801147	-0.20980052048628	0.0582916667569511	-3.59915116788561	0.000319257573012627	0.00104646779005679
BUD13	417.79794397928	-0.0538818562864789	0.0637123725446846	-0.845704753008357	0.397717470980586	0.511507038460479
BUD31	1311.39797456507	0.277509588744587	0.0834354578535183	3.32603902326264	0.00088089594935057	0.00256479665998947
BVES	291.246621974608	0.60345934841751	0.1905713909568	3.16657891506027	0.00154243488838492	0.00419678479070285
BYSL	378.279947476996	-0.080103563126556	0.0932629460734221	-0.858900200981146	0.390395578530874	0.503646048292671
BZRAP1	1563.670142854	-1.10110318190133	0.145232350133269	-7.58166607433489	3.41145392353431e-14	1.1558227976734e-12
BZW1	3015.4936391297	0.26295437158384	0.0518215091728128	5.07423222096732	3.89063689946951e-07	2.61147927411683e-06
BZW2	730.209911486624	-0.077639660951964	0.119991745282026	-0.647041684154869	0.517604965744962	0.629444190186124
C10orf10	1097.46326791048	1.44674698892991	0.212285014736371	6.81511594554415	9.41877702886244e-12	1.75942379274942e-10
C10orf105	275.659611757689	1.83017369435108	0.336613336233882	5.437020751547	5.41788303328118e-08	4.43079251469036e-07
C10orf107	82.7950349143401	0.785581313770506	0.238430347397159	3.29480421576514	0.00098490273624937	0.00282676741212748
C10orf108	2.44791112787569	0.696279985177488	0.260259215509032	2.67533268251677	0.00746551272568731	0.0168360431425707
C10orf11	36.6399172894738	0.831605715158493	0.190441092635101	4.36673463511318	1.26117796641369e-05	5.88822087683203e-05
C10orf110	33.6056058264622	-0.0426316400886177	0.164326113483453	-0.259433142942985	0.795301060475759	0.867746540274029
C10orf111	9.08485250721693	-0.262887201862174	0.142884667562268	-1.83985592259303	0.0657893926487173	0.112476508866353
C10orf113	0	NA	NA	NA	NA	NA
C10orf114	55.205382134481	1.06382275558303	0.199115428298222	5.34274397858167	9.15500252600686e-08	7.12326110163058e-07
C10orf116	434.461654541491	0.40365307950696	0.207579953633025	1.94456676785161	0.051827142235886	0.0914602370661732
C10orf118	207.2829026493	-0.182029923531702	0.126415195427291	-1.43993704962785	0.149885209790797	0.227757444496381
C10orf119	1033.70541148177	-0.203641980004721	0.0624824239748781	-3.25918821725927	0.00111731515039049	0.0031636718539695
C10orf12	49.316229673113	-0.300998795107308	0.126213149843561	-2.38484496647449	0.0170863202114456	0.0347739838672218
C10orf120	0.290214337489419	-0.928343524484892	1.07948474481995	-0.859987627374703	0.389795862782496	0.503057195498731
C10orf122	0	NA	NA	NA	NA	NA
C10orf125	71.7492348244342	0.647919779972427	0.175067862519091	3.70096356149759	0.000214782320755226	0.000733911233153638
C10orf128	15.6791911968899	0.53075049960652	0.200657786050789	2.64505310285931	0.00816780978647781	0.0182332996734717
C10orf129	0.00553608702506999	0	3.58413516627555	0	1	NA
C10orf131	1.06341799414598	-0.433155544547883	0.294482309191686	-1.47090514787403	0.141316770295551	0.216577285389177
C10orf137	305.091577285588	-0.493904712812125	0.0711825662642808	-6.93856289162709	3.96108647140834e-12	8.11091979544335e-11
C10orf140	32.5561445028313	0.660114509674592	0.200611281957894	3.29051538493803	0.00100004033072489	0.0028653854773607
C10orf18	1324.10979864731	-0.503725948172617	0.0943445026675649	-5.33921886204182	9.33479007564256e-08	7.25411144161091e-07
C10orf2	430.830406915965	-0.57343311283064	0.102473848698002	-5.59589710073827	2.19483856510069e-08	1.95821406455841e-07
C10orf25	122.435375299727	-0.113526237255111	0.100094600746655	-1.13418942089046	0.256715100643612	0.357341316913724
C10orf26	1724.47655713742	-0.0803811088567094	0.0797495663346195	-1.00791907155257	0.313493315136473	0.421530841997772
C10orf27	0.0200658718477411	-0.122928990373778	3.58413516627555	-0.0342980899633648	0.972639447963502	NA
C10orf28	233.158680263438	-0.111511414382401	0.0615875264444684	-1.81061687033246	0.0702001789086536	0.11898593740117
C10orf32	823.52661839044	-0.158322209094059	0.0948210331439595	-1.669695043859	0.094979714830998	0.154393539569111
C10orf35	155.015150211575	-0.0322351167580126	0.217012587018441	-0.148540309117063	0.88191637670277	0.931075390127406
C10orf4	552.69621553947	-0.639284863050767	0.0950342692394771	-6.72688776550522	1.7333032916693e-11	3.06369532761471e-10
C10orf40	0	NA	NA	NA	NA	NA
C10orf41	40.5919837777904	0.629761319495744	0.120104895237374	5.24342757429735	1.57620696969185e-07	1.15178680905408e-06
C10orf46	938.573156609282	-0.184069610319549	0.0636949118854793	-2.88986364641651	0.00385408957324278	0.00941340402089386
C10orf47	12.8526828938497	0.334951666876526	0.167659526732114	1.99780873419565	0.0457374000729672	0.0821764410977286
C10orf50	1.08703726492693	0.230002739436836	0.370041566646226	0.621559198123078	0.534231757338999	0.645266000870519
C10orf53	0.0673984778971836	0.0424914551566402	2.28838464046343	0.018568318631974	0.985185476546337	0.992495703224657
C10orf54	2546.41628288582	0.123339648889265	0.141634335998766	0.870831553800203	0.383846133711221	0.496976101251706
C10orf55	7.0579231636894	0.729275238153414	0.307904080473787	2.36851436665355	0.0178596867394806	0.036167216899147
C10orf57	493.653840838333	-0.115444924440058	0.0653929363978325	-1.76540358637091	0.0774959610821786	0.129581823010772
C10orf58	3098.29408871202	-0.428891283412967	0.127465939885742	-3.36475205688215	0.000766124713704715	0.00226298480781516
C10orf62	1.26407835303094	-0.936793171311342	0.339683852174778	-2.75783839977572	0.00581849543051443	0.0135204428111272
C10orf67	2.32712318069121	1.63509662567081	0.410993520674982	3.97840000734188	6.93805780641887e-05	0.000271041390869608
C10orf68	5.7963754058692	-0.518558758684293	0.186586841818987	-2.77918182026663	0.00544960125161274	0.0127581818130971
C10orf71	0	NA	NA	NA	NA	NA
C10orf72	506.599538314236	0.425444210427109	0.111932544503665	3.80089823128408	0.000144172510263117	0.000516880243453837
C10orf75	348.933699098752	-0.305969681270336	0.151439296111537	-2.02041140659414	0.0433407312286427	0.078411736220534
C10orf76	641.898092516495	-0.118140368363335	0.0567427256094975	-2.08203548726889	0.0373392283923895	0.0689520779775093
C10orf78	126.535253881298	0.0905092760722815	0.0822790312683957	1.10002846019223	0.271319721857196	0.374416020381264
C10orf79	80.4341020665303	2.2196677671744	0.267648574921199	8.29321720778043	1.10225795581845e-16	6.88396835340482e-15
C10orf81	32.4197588887315	1.8972005271769	0.52840882008488	3.59040283784845	0.000330167290713382	0.00107845438612377
C10orf82	2.93906421141782	-1.38047166108929	0.42583132964275	-3.24182737387462	0.00118765938851501	0.00333612988054232
C10orf84	564.619024866082	-0.116094642380782	0.0594129852616273	-1.95402809452437	0.0506978947537613	0.0897463866313749
C10orf88	170.377893593351	-0.3540675498454	0.0640314805628129	-5.52958555281368	3.20988229018982e-08	2.76380306015608e-07
C10orf90	145.544272903657	0.619325700615461	0.1968495395618	3.14618821051916	0.00165413522618574	0.00446118865665987
C10orf91	0.0362362474086209	0.169947153535475	3.58413516627555	0.0474165023502938	0.962181276839686	NA
C10orf93	16.672716200634	0.802944131429169	0.168415594145076	4.76763529829369	1.86400813778022e-06	1.05798414024387e-05
C10orf95	3.14991033144475	-0.649319441590236	0.192842283484496	-3.36710097939927	0.000759628676319844	0.00224698498255898
C10orf96	0	NA	NA	NA	NA	NA
C10orf99	0.0549392912618185	0.0153731261825927	3.58413516627555	0.00428921496243896	0.996577712097022	0.998343945166387
C11orf1	230.066722440143	-0.169163439315763	0.0805844010051282	-2.09920824881478	0.0357985471801343	0.0663620837010978
C11orf10	908.460226930451	0.00175118058969803	0.0757669926016546	0.0231127108199328	0.981560366627128	0.990379512798784
C11orf16	0.100486758363885	0.281133082941872	1.2600311801633	0.223115973134441	0.823445246919914	0.889277200201252
C11orf17	410.102453392829	0.0100638373572555	0.0664307359226538	0.151493690646044	0.879586287533646	0.929231952818178
C11orf2	3006.81432727628	-0.594917278499069	0.0896497153879992	-6.63601971210169	3.22266763913061e-11	5.35757771843399e-10
C11orf20	20.8835261430789	-1.19687233831406	0.246020102031947	-4.86493716744596	1.14493173806974e-06	6.87325890563109e-06
C11orf21	6.83561767889319	1.81766994761433	0.261088987226071	6.96187903950331	3.35763749724395e-12	6.98985512759585e-11
C11orf24	547.696143308653	0.302733717575791	0.0844647827108848	3.58414131735851	0.000338188954706263	0.00110024453123399
C11orf30	394.1574869266	-0.276008075040578	0.0858176867939455	-3.21621434172764	0.00129893777131545	0.003603864665092
C11orf31	815.7520035407	0.0106697817063898	0.0909772600779039	0.117279655347427	0.906638446443177	0.946118425623275
C11orf34	0.0949867181841843	0.026220997745299	1.26068412891541	0.0207990226448377	0.983405977387733	0.991451106983058
C11orf35	6.23978092868116	1.26576958470829	0.235700405181464	5.37024780985755	7.86285195545374e-08	6.19766067469e-07
C11orf36	0	NA	NA	NA	NA	NA
C11orf40	0	NA	NA	NA	NA	NA
C11orf41	1058.21492150714	-0.731557638889111	0.152410378920671	-4.79992008464123	1.58728956267592e-06	9.17318237085008e-06
C11orf42	1.49256345416439	-1.11039795482791	0.289906509739209	-3.83019324342455	0.000128042664783669	0.000464833824333816
C11orf45	44.9546376002903	0.900528747102303	0.152254528369589	5.91462701796509	3.32628466322849e-09	3.5942189610026e-08
C11orf46	594.805452950887	-0.213996162001935	0.0596507970827581	-3.58748201981344	0.000333886748854689	0.00108870555630725
C11orf48	637.254045751382	-0.154988921369632	0.0962072892620672	-1.61098938093396	0.107182036978292	0.171418066139589
C11orf49	1213.19799070407	-0.0944281064379714	0.0791092142895905	-1.19364232455026	0.232617910350642	0.329253544483616
C11orf51	395.533962974927	0.0191128364281939	0.0933345402114483	0.204777742354481	0.837745777528419	0.900088681856723
C11orf52	19.5090798202061	0.0596681903684857	0.248682229350212	0.239937491811917	0.810378715392429	0.879169404261294
C11orf53	0.149744510239707	0.574010160103626	1.67179732440744	0.343349131933251	0.731335822818057	0.816391085338365
C11orf54	527.380678639973	-0.165409650988607	0.0605567511241965	-2.73148159235568	0.00630502630179059	0.0145195394285089
C11orf57	1036.21868540603	-0.111459640049774	0.0501484656732775	-2.22259322500404	0.0262432414732698	0.0507788784439126
C11orf58	2753.24944792795	-0.0950030127128751	0.0530255743858697	-1.79164514129604	0.0731898272717813	0.123372433986873
C11orf59	2180.32036014737	-0.0893947953144429	0.065665687320262	-1.36136236385451	0.173399203702496	0.257616959842198
C11orf61	237.180316885726	-0.0477640286969198	0.0936999294175313	-0.509755226005359	0.61022295718222	0.713768093754905
C11orf63	48.5709588108899	2.84238173253435	0.309617381531411	9.18030414983659	4.2987551713105e-20	6.54808755200597e-18
C11orf64	0	NA	NA	NA	NA	NA
C11orf65	6.37750788226982	-0.418980768864686	0.144142835380554	-2.90670547556892	0.0036525692358712	0.00899271185325661
C11orf66	66.0893739796016	0.7474241295841	0.193679167100404	3.85908376607501	0.000113812924970857	0.000419350828368531
C11orf67	248.016291174261	0.0579422022361943	0.108680343801749	0.533143346895282	0.593934354961953	0.699475395975056
C11orf68	1240.60117201572	-0.204742450586901	0.0659619321626039	-3.1039486545389	0.00190956467182843	0.00506980355553032
C11orf70	55.3500637218125	1.62904949157431	0.275980425837525	5.90277186010778	3.57444413570646e-09	3.8334736878418e-08
C11orf71	387.516719920862	0.0814394349594478	0.0871782684934931	0.934171283357462	0.350215546201266	0.461632086226743
C11orf73	612.239191282261	-0.186824420061338	0.0683261608096322	-2.73430290605469	0.00625125076399006	0.0144063264839013
C11orf74	215.224963546681	-0.116082455763301	0.0795038712241123	-1.46008557792209	0.144266555757287	0.220633269828465
C11orf75	131.667327259094	0.381292530233371	0.131361503173574	2.90262002962582	0.00370055321243759	0.00909202112578968
C11orf80	85.1925979297812	0.0332501611021648	0.122798017601862	0.270771155361556	0.786567046074008	0.861316199605062
C11orf82	72.1369778265952	0.762855471654624	0.186110909880556	4.09892935424483	4.1506569139824e-05	0.000171254586964048
C11orf83	356.010464758759	-0.110558604640862	0.122906781842063	-0.899532173765079	0.368369266425256	0.480858815282073
C11orf84	397.73239186643	-0.140344215300202	0.0732594809790566	-1.91571402669811	0.0554015060396288	0.0969556146743029
C11orf85	0.0151315130820234	-0.0334390965091226	3.58413516627555	-0.0093297531922801	0.992556041964281	NA
C11orf86	1.37467830796367	2.81381736278755	0.58105503330502	4.84260044488843	1.28150816841124e-06	7.60205069278713e-06
C11orf87	140.705929553758	-1.00197771492622	0.362362789936135	-2.76512308314772	0.00569013211964541	0.0132501013414959
C11orf88	5.24659217936623	5.05478083586666	0.686810489008377	7.35978980630421	1.8420004091416e-13	5.06036945244531e-12
C11orf9	1866.58704824507	0.797767493703134	0.260818186633556	3.05871114280839	0.00222291371908997	0.00578531899442557
C11orf90	1.35171098340067	-0.934656176566846	0.419409916310971	-2.2285028088698	0.0258470042392215	0.0501106655035239
C11orf92	101.59989728901	0.2961865504874	0.285068996471058	1.03899951995471	0.298804959524792	0.404948261964305
C11orf93	98.1045186460788	0.446225325917569	0.219318967326305	2.03459523522956	0.0418916172041781	0.0761724902889637
C11orf94	0.0197600295927537	0.0045263555524339	3.58413516627555	0.00126288639865596	0.998992362708308	NA
C11orf95	810.663563121489	-0.467665070148199	0.0959265046635055	-4.87524351886573	1.08674309954501e-06	6.58087224081294e-06
C12orf10	752.545088588369	-0.140477311122695	0.0718063926525054	-1.9563343308793	0.050425782500528	0.0893237648605364
C12orf11	462.941411969803	0.158886276043388	0.0804249449266414	1.97558451781738	0.0482018535584626	0.0859122838918716
C12orf12	0	NA	NA	NA	NA	NA
C12orf23	1138.03604761658	-0.142019521229807	0.0677858168919923	-2.09512148324621	0.0361601946496035	0.066959617212391
C12orf24	306.198167224738	-0.424521354684933	0.0808348571680687	-5.25171157044646	1.50692307731994e-07	1.10633662917972e-06
C12orf26	53.0486213912567	0.283827750215585	0.0855400895320141	3.31806702294086	0.000906427317008176	0.00262879146075236
C12orf27	0.0540535945139318	0.0424906376883224	3.58413516627555	0.0118551995717496	0.990541140864069	0.995055429479878
C12orf29	509.487371305131	-0.216690565671196	0.0656151225660172	-3.30244853925522	0.00095844672660546	0.0027626858261046
C12orf32	610.697422125868	0.374900048962954	0.104052686036898	3.6029829045452	0.000314586225931265	0.00103278211477978
C12orf34	1117.00110971232	-0.70499325799578	0.158798721471742	-4.43953988710944	9.01514059416442e-06	4.35441284280136e-05
C12orf35	497.925090007661	0.331936599904643	0.0984892824049247	3.37028143366841	0.000750914491789543	0.00222401737561949
C12orf36	0.00495132054472983	0.0180853452939775	3.58413516627555	0.00504594398786887	0.995973936282382	NA
C12orf39	56.1308168778872	0.135512907957949	0.320694022435281	0.422561377754699	0.672615310483827	0.768750104143536
C12orf4	465.124164389389	0.178533491342167	0.105436870022717	1.69327381686975	0.0904033595521013	0.147929899088923
C12orf40	0.20811705430949	0.56045144888059	1.29840298176764	0.431646766643738	0.665998162905307	0.763235768560391
C12orf41	537.834544985337	-0.0432046631521628	0.0613659927549341	-0.704048956312027	0.48140228626254	0.595227817082759
C12orf42	0.807367941657096	0.392599358938459	0.398397769674173	0.985445674707326	0.324405203587733	0.433218524192428
C12orf43	323.563044300461	-0.131383715339234	0.0541592091051641	-2.42587950433543	0.0152713397204477	0.0315426988206712
C12orf44	665.06975610792	-0.12939230758281	0.0812921686154752	-1.59169462183813	0.111453337355562	0.17725473129867
C12orf45	79.9567997614177	0.219564504605746	0.0960739262259369	2.28537037290843	0.0222911197057404	0.044055529409995
C12orf47	371.167147357656	-0.231413313324922	0.0734608633553374	-3.15015782220735	0.00163182285279929	0.00440735663399849
C12orf48	40.193991826209	0.843065772606079	0.162091947249443	5.20115765719495	1.98051006945186e-07	1.42008559744546e-06
C12orf49	612.215769995881	0.158664869748386	0.107552058757653	1.47523786695618	0.140148604248401	0.215002394923282
C12orf5	423.433898515361	0.70838644718352	0.0992970761337387	7.13401113875122	9.7485436802851e-13	2.28025860666444e-11
C12orf50	0.125674463185898	0.305539663432943	1.04607414211107	0.292082225468586	0.770223756445472	0.848079002160458
C12orf51	2131.19098164964	-0.734181229354513	0.0806492174834892	-9.10338937268445	8.75558569612618e-20	1.20621068825456e-17
C12orf52	382.374716330414	0.128443121607048	0.0697495252907361	1.84149097892294	0.0655496413639592	0.112110185117221
C12orf53	1793.58059437132	-0.861449522818844	0.135035889730923	-6.37941161076065	1.77769650364033e-10	2.52134153612454e-09
C12orf54	0.864444758895723	-0.149786865099154	0.435134434871494	-0.3442312377401	0.730672391864495	0.816185413102795
C12orf56	0.391226623621499	1.1464473142218	0.911353661557693	1.25796094598697	0.208405880550229	0.300707938235586
C12orf57	1667.37043434911	-0.230880262970608	0.123192629944685	-1.87414022311461	0.06091110060704	0.105240721225885
C12orf59	64.7720268267913	0.674402371183123	0.171578627519997	3.93057329418562	8.47435545345765e-05	0.000324428941103356
C12orf60	22.094310022807	0.422007897382888	0.097783225464082	4.31574940773355	1.59062344602887e-05	7.21770910263912e-05
C12orf61	8.38907335319914	0.296598957302499	0.15290549176185	1.93975346395308	0.0524096586558508	0.0923403577746869
C12orf62	466.168891344604	0.101456590282036	0.0888112113721501	1.14238493895661	0.253294048834065	0.353261671799542
C12orf63	18.9003686371887	2.68666561103164	0.353356755351332	7.6032665863721	2.88747814787801e-14	1.00131649872698e-12
C12orf65	413.401647735109	-0.0928087879451539	0.0645026260060479	-1.43883735735739	0.15019660927596	0.228101132479078
C12orf66	89.809619788557	0.189335192482896	0.0969364900647478	1.95318803431434	0.0507973184087761	0.089896907311498
C12orf68	368.9362483987	0.0651155750772014	0.18415323648034	0.353594519008919	0.723642782532492	0.811186500749597
C12orf69	0.943507305178558	0.102948998968268	0.322861099833569	0.318864672830938	0.749829134034447	0.831849735059885
C12orf70	0.592752725403941	1.87184218793289	0.499989068281094	3.74376622746588	0.000181282328617056	0.000632849955090211
C12orf71	0.643116790701123	-0.293735204108041	0.407832348321154	-0.720235178296193	0.471380207948672	0.585661775605194
C12orf72	58.9179562032226	0.35339259388855	0.0761724781530984	4.63937372732274	3.4946658321901e-06	1.86594639589381e-05
C12orf73	144.688816698235	-0.174402211312199	0.0764193502834492	-2.2821734372946	0.0224791026796851	0.0443699396812829
C12orf74	0	NA	NA	NA	NA	NA
C12orf75	168.083426852943	0.302052689044958	0.136623992137995	2.21083196529548	0.0270474753947034	0.0520984372360608
C12orf76	717.415553614697	-0.175664482078888	0.0733749402078121	-2.39406644259432	0.0166627300212756	0.0340301841812317
C12orf77	0	NA	NA	NA	NA	NA
C13orf1	347.803471090627	-0.125086092047241	0.0734941533308054	-1.70198697962019	0.0887578090860219	0.145529562530472
C13orf15	2736.40745496915	-0.719523106725328	0.165200305213731	-4.3554587008446	1.32788552319747e-05	6.14910112768853e-05
C13orf16	8.27013030619212	-0.676484282235769	0.237171593431497	-2.85229893027287	0.00434042620990478	0.0104648340585222
C13orf18	218.864771344628	1.07948900450995	0.207055192030025	5.21353265246018	1.85277899386813e-07	1.33565476064307e-06
C13orf23	776.076430734701	-0.165292581744694	0.0744707000830278	-2.21956529964681	0.0264482899798321	0.0511071742019529
C13orf26	23.2191922853249	2.65616729495604	0.408344752952317	6.50471758422766	7.78394756273864e-11	1.18859039556211e-09
C13orf27	200.354185715517	-0.504962787826035	0.121106474385897	-4.16957714595015	3.05165307253585e-05	0.000129591504911677
C13orf28	0	NA	NA	NA	NA	NA
C13orf29	30.4337198225033	1.52794602301377	0.211848012560151	7.21246333420253	5.4948629455333e-13	1.35588489335411e-11
C13orf30	6.90571806567584	4.87638604528573	0.811934799688779	6.00588378174564	1.90292467546251e-09	2.1806236525667e-08
C13orf31	155.205172415999	0.962494117668335	0.192915011718864	4.98921317264299	6.06257172463946e-07	3.89134442729856e-06
C13orf33	13.1145872120751	2.45969587270098	0.364055270252123	6.75638034575778	1.4148171773201e-11	2.54395533918132e-10
C13orf34	80.6788140476129	0.575920105567543	0.102421280002119	5.62305124048078	1.87613721289186e-08	1.7080324013966e-07
C13orf35	0.146719669958179	-0.282927780980726	0.965620889575652	-0.293000890965666	0.769521470673417	0.847455138690246
C13orf36	49.6384339532688	-0.920058587901796	0.385181742828927	-2.38863498862776	0.0169110945317608	0.034464886871907
C13orf37	279.111208293028	-0.0242531909539045	0.0847963160772255	-0.286017035596414	0.77486507383598	0.851737871715513
C13orf38	15.3752651369673	0.819090242906657	0.179023894615094	4.57531238870499	4.75509922385943e-06	2.45634240579626e-05
C13orf39	1.38497914332167	-0.069251498080216	0.683826267033279	-0.101270602518177	0.919335651987023	0.954539915523905
C14orf1	820.273621180805	0.084819036298456	0.076374301215317	1.1105703744422	0.266753320629461	0.369147663439957
C14orf101	294.538631183745	0.0536400353911904	0.088277795104513	0.607627720285552	0.543434411401113	0.653600406471386
C14orf102	272.859944706785	-0.00870930328253308	0.0719884927391047	-0.120981881286176	0.903705386409309	0.944496075026409
C14orf104	271.286973311614	-0.175899965606954	0.0730373344048235	-2.40835686351852	0.0160245086348028	0.0328916732889642
C14orf105	1.50027555549789	0.364250656746985	0.618665956293276	0.58876790138799	0.556016981043111	0.665062190808461
C14orf106	228.549531834814	0.671126476979715	0.131832998036995	5.09073211542519	3.56683644394354e-07	2.42043634964601e-06
C14orf109	255.368863158032	0.0231159795136822	0.0648837586065839	0.356267577743818	0.72164018766592	0.809425919307272
C14orf115	0.125516038041774	0.229608174557782	1.67540401592147	0.137046451110181	0.890994078791951	0.937013210548254
C14orf118	224.907118823807	-0.280708446176198	0.100281983855611	-2.7991911945058	0.00512307929032851	0.0120828315185794
C14orf119	593.160272924562	0.201593558405179	0.0568516024789233	3.54596088087256	0.000391184273529369	0.00125285958099936
C14orf126	380.449790499166	-0.0415162764658699	0.0674319483347257	-0.615676656112427	0.538107947176983	0.648609785017238
C14orf128	148.666829191074	-0.270756691673038	0.11042511749997	-2.45194841357639	0.0142085029915034	0.0296283263270793
C14orf129	255.378736167551	0.134945441128565	0.0773241826964419	1.7451906560504	0.0809516871871738	0.134627268874391
C14orf132	4840.32983743334	-0.531321075673295	0.134808907210226	-3.94129057692555	8.10443758186525e-05	0.000311732175187492
C14orf135	1107.49027789794	-0.0396028314419445	0.0701762814012903	-0.564333570419369	0.572527138829298	0.679948559400718
C14orf138	92.4040818797402	-0.26561842443261	0.100949448148927	-2.63120234239173	0.00850833622282951	0.0188899380816369
C14orf139	160.883809540049	0.224451301029709	0.136400521172042	1.64553111015323	0.0998603325174041	0.161263850202214
C14orf142	162.441469452717	0.5115437827383	0.0774423003774174	6.60548279487148	3.96223924634879e-11	6.46659534142778e-10
C14orf143	46.1375140267318	0.326190620093445	0.088882289407344	3.66991694597927	0.000242629287846342	0.000817314336046217
C14orf145	62.3869737320003	0.166808555746964	0.104251478977408	1.60005936973914	0.109585413342615	0.17475464332175
C14orf147	1170.0579698069	0.259128261162906	0.0932015630934308	2.78029952033251	0.00543087814814605	0.0127222971972574
C14orf148	11.4166744973823	0.269968540115707	0.14474495630616	1.86513262365204	0.0621628167347725	0.107166225095942
C14orf149	184.229143545515	0.181793840295635	0.113382186638841	1.60337214940745	0.108852516051451	0.173822614910081
C14orf153	398.861134087785	0.273389231147355	0.0760053615223549	3.59697297232045	0.000321941920748213	0.00105433609366554
C14orf156	463.391159226184	-0.131706857980171	0.0889092421816145	-1.48136295787039	0.138509879994583	0.212889344674201
C14orf159	1291.70670602619	-0.126144706012246	0.10458953269797	-1.20609302631194	0.227781623456172	0.323606043150958
C14orf162	13.3759871433431	-0.820944593413984	0.317026447281541	-2.58951453562777	0.00961113651174447	0.020990121655676
C14orf165	0	NA	NA	NA	NA	NA
C14orf166	1471.43339569954	0.0931863899813406	0.0667518253600988	1.39601261057115	0.162710697709114	0.244352968281336
C14orf166B	0.476041167188464	1.16752406465708	0.598670199528294	1.95019572642333	0.0511527949773807	0.0903979217785517
C14orf167	493.735203787422	-0.0479662338571624	0.128766238576424	-0.372506290371243	0.70951592941265	0.799849004420903
C14orf169	99.6510380048885	0.751190508249018	0.128455829676797	5.84785065916478	4.97965306570602e-09	5.15747815583571e-08
C14orf174	31.027301812837	1.13647246590411	0.180437855940011	6.29841481979226	3.00704893882445e-10	4.05324236818812e-09
C14orf176	19.0308498562381	-0.157869984332384	0.12906206977876	-1.22320976723066	0.221250477438743	0.315836110117508
C14orf177	0	NA	NA	NA	NA	NA
C14orf178	2.65565839287992	-0.61327725783639	0.201977324025048	-3.03636688324643	0.00239447812584841	0.00618459594974912
C14orf179	291.628004643691	0.0553367132220431	0.0935862758514316	0.591290899425149	0.554325526188254	0.663608386925846
C14orf180	0.88264457108402	0.640169754345082	0.534596015354577	1.19748321341393	0.231118266632402	0.327526801575122
C14orf181	21.5301204667823	0.483432976698591	0.200453136984765	2.41170072950933	0.015878308804536	0.0326416495240055
C14orf182	0.344162887468608	0.974498690817073	0.708439962514406	1.37555578790102	0.168959202651029	0.252019713467851
C14orf183	0.0100389460482474	0	3.58413516627555	0	1	NA
C14orf184	0.10601578272208	0.16723624065368	1.2595405962093	0.132775585921559	0.89437086299273	0.93892152681301
C14orf19	3.27765911268469	-0.371538491704193	0.213857452982851	-1.73731841711397	0.0823309824996628	0.136533305727888
C14orf2	846.001678319412	-0.0996587476963358	0.0840481897633086	-1.18573342242098	0.235727591164069	0.332925685817126
C14orf21	314.839889256431	-0.303299602318631	0.10524751283437	-2.88177453462428	0.00395442581143733	0.00961584970838285
C14orf23	31.1003520959161	0.390705538300903	0.280047065038763	1.39514241381827	0.162972898272441	0.244668287021831
C14orf28	76.6928532692106	-0.179022450421269	0.0759385492376113	-2.35746471612341	0.0184002038317355	0.0371533806435388
C14orf33	45.1972189718937	-0.109081757357332	0.0912763756387749	-1.19507108596228	0.232059257692895	0.328586929574825
C14orf34	0.12077929045595	0.140117868438037	1.26299113558852	0.110941292056453	0.911662901362125	0.949174242914388
C14orf37	329.01186912434	-0.147134999044423	0.140249886300693	-1.04909175276598	0.294135891508919	0.399951379875978
C14orf39	1.62290934453849	0.222723694732992	0.639653110838766	0.348194499423192	0.72769411845525	0.814169174929987
C14orf4	1235.83725935196	0.0339353942310898	0.0911390438537533	0.372347490122284	0.709634144397076	0.799934139307118
C14orf43	937.715828377644	-0.22659322135342	0.0814164974796858	-2.78313644491962	0.00538361602044337	0.0126305321511429
C14orf45	117.733878188961	0.676987337169066	0.114450661715101	5.91510199263221	3.31669994540199e-09	3.58785740052261e-08
C14orf48	0.0158136612843101	-0.0334390965091221	3.58413516627555	-0.00932975319227995	0.992556041964281	NA
C14orf49	81.1874739756177	-0.206025727209327	0.163196729400063	-1.26243784398567	0.20679127888955	0.298654235818594
C14orf50	13.5923002456461	2.25756716571923	0.296472383087478	7.61476378409623	2.64174146041326e-14	9.2688516858245e-13
C14orf53	0.0515622471202816	0.0560501413479232	3.18154442644185	0.0176172744539067	0.985944175794078	0.992826853637376
C14orf64	59.7172022294152	-0.183452594052659	0.132301558373109	-1.38662458937405	0.165556266278639	0.247930797298103
C14orf68	0.924062531194433	-1.00499560995511	0.400040564736664	-2.51223425458533	0.0119969423228582	0.0255135881227095
C14orf70	0.250257073578275	0.26486129458069	1.80857435097483	0.146447556572905	0.883568087247985	0.932304844117421
C14orf72	0.212572353717477	1.16790197346215	1.09604499899019	1.06556024117456	0.28662248011431	0.39166791535422
C14orf73	0.270666573253619	0.148253485557992	1.08186195730505	0.13703549196544	0.891002741200239	0.937013210548254
C14orf79	255.97045094638	0.326066153640159	0.0948277478018285	3.43850994248617	0.00058492505767357	0.00178691600857199
C14orf80	182.511443421404	0.00658800097418124	0.136650914599728	0.0482104418655268	0.96154852846033	0.979533124686426
C14orf86	19.797854778739	1.43481891722312	0.285790349079882	5.02052963594677	5.15291998261455e-07	3.34993437870459e-06
C14orf93	248.780789673375	-0.246664718451998	0.0753985174666491	-3.27147968872339	0.00106986273238537	0.00304172202639943
C15orf17	1767.25257759398	-0.383680415537017	0.0516691508557847	-7.42571552236109	1.12171854316385e-13	3.26343456905557e-12
C15orf2	0.551227303033002	1.34511431174914	0.73674285281546	1.82575820940617	0.0678866907793643	0.115535020296318
C15orf21	30.0438410530345	0.0162944154580375	0.149795609053738	0.108777657509253	0.913378845369681	0.950561130873716
C15orf23	242.699022076566	0.287773903862786	0.116364576219764	2.47303701187639	0.0133970267517702	0.0281492310442039
C15orf24	1278.97622010653	-0.000464942311199977	0.0606010954759961	-0.00767217667515828	0.993878548736977	0.996804694027943
C15orf26	10.4383903155155	5.15254999149343	0.554321181353964	9.29524283901258	1.46870545909771e-20	2.54793198904211e-18
C15orf27	24.1067990782371	-0.329092317795527	0.227116819819825	-1.44900020199561	0.147337526167311	0.224486939112852
C15orf28	4.97364501772762	-0.805451325055261	0.188952636937064	-4.26271545140456	2.01957621085373e-05	8.94322379734237e-05
C15orf29	440.691111262769	-0.321640959354662	0.0639975246697495	-5.02583437428942	5.01248362287045e-07	3.27112132212124e-06
C15orf32	0.0258356676770315	-0.0469980862483022	3.58413516627555	-0.0131128107808334	0.989537790552277	NA
C15orf33	35.4090910337859	0.167412462762489	0.107229354582453	1.56125590249412	0.118463383729365	0.186499450260767
C15orf34	7.06841474939694	0.306084585432032	0.158320165960296	1.93332658272221	0.0531959791124964	0.0935147180194907
C15orf37	47.2265564440954	-0.0758869550457287	0.114218682158458	-0.664400548243496	0.50643398206469	0.618670345436789
C15orf38	375.875064734548	-0.0255471315972339	0.0859384291212358	-0.297272499142308	0.766258475633797	0.845053787714099
C15orf39	516.143491734874	-0.533619161354341	0.101373261572966	-5.26390443667685	1.41027774755703e-07	1.04356097465358e-06
C15orf40	231.614631588078	0.0814272481056772	0.0498322205062977	1.63402809022702	0.1022529525014	0.16458303779317
C15orf41	124.53485859443	0.17699683425874	0.071190607068717	2.48623858605241	0.012910138037249	0.0272238994109057
C15orf42	113.050530554247	0.0233904234263247	0.176035703823078	0.132873178101602	0.894293679558118	0.938893106589763
C15orf43	0.0387674021187685	0.283843509724871	3.58413516627555	0.0791944211244207	0.936877981954837	NA
C15orf44	775.487773831807	0.0461772490102444	0.0477746309315103	0.966564222682203	0.333761927116374	0.443563871928811
C15orf48	3.14571783128458	1.24781712489881	0.354192262392754	3.52299374489198	0.000426701430824689	0.00135250854473547
C15orf5	0.102033999691665	0.15367694034631	1.40034558234436	0.109742153853933	0.912613868354362	0.94991431051231
C15orf50	0.490906743761376	-1.98431879575781	0.487525004274949	-4.07018876643856	4.6975059600347e-05	0.000191581348862016
C15orf51	9.59635497928049	0.909644533326795	0.324563720270094	2.80266855633098	0.00506817249036439	0.0119729264631783
C15orf52	845.075257531394	0.325775819354799	0.126866179735399	2.56786970360627	0.0102325609992012	0.0221612834216892
C15orf53	0.0100185138657514	0.056050797355534	3.58413516627555	0.0156385835788049	0.987522724196495	NA
C15orf54	0.486821180161622	0.0343562597710494	0.944643225847569	0.0363695613655872	0.970987684626668	0.985078257481333
C15orf55	0.0349521685484778	-0.00903285890954277	3.310543670924	-0.00272851223467522	0.997822964915249	NA
C15orf56	3.66262154569523	1.69654908259978	0.247227065250403	6.86231129622253	6.77552113651207e-12	1.30603049396801e-10
C15orf57	297.727706948294	-0.00451514756754735	0.0603182461950744	-0.0748554185900062	0.940329747800191	0.967544519456553
C15orf58	39.0075810975882	0.0330178178055383	0.0715509481893079	0.46145884353874	0.644469442576554	0.745034829154953
C15orf59	684.665749236951	-0.584669350274688	0.146604208994156	-3.98808024876009	6.66101333556505e-05	0.000261417565678984
C15orf60	0	NA	NA	NA	NA	NA
C15orf61	93.888600135746	-0.180359996959486	0.076178976787138	-2.36758229850545	0.0179047374291861	0.0362427787892427
C15orf62	28.0981942941192	-0.466058460805696	0.130801035212782	-3.56310987942512	0.000366487184533567	0.00118123239109254
C15orf63	944.687591123266	-0.209206805982446	0.1005298520622	-2.08104161789679	0.0374300968730097	0.0690994477300925
C16orf11	0.50794227896314	-0.223267469957411	1.04476962363281	-0.213700192757403	0.830780861015935	0.89487813107937
C16orf13	600.272853971462	-0.0141674836723045	0.106578819649627	-0.132929635727619	0.894249028963256	0.938893106589763
C16orf3	2.25867578034253	0.214368360037731	0.248496741854612	0.862660646726511	0.388324075334937	0.501664474624242
C16orf42	1278.50630210773	-0.0849596003164782	0.0918583580516206	-0.924897876671543	0.355019031221215	0.466454177346471
C16orf45	2454.22370890886	-0.496725524024724	0.079468462615804	-6.25059939093297	4.08880430410261e-10	5.42164454647321e-09
C16orf46	84.8398221945326	0.235306017205055	0.0940981118402632	2.50064547102178	0.0123967208804098	0.0262564958642729
C16orf48	481.302808830644	0.199682133524521	0.123683991501276	1.61445415126711	0.106428954068141	0.170373622985363
C16orf5	3247.26997035732	-0.276726983283016	0.091536061154627	-3.02314715962658	0.0025016056145962	0.00642848481622196
C16orf52	396.708740803199	-0.321385918092446	0.0620978802972474	-5.1754732456897	2.27334007031787e-07	1.60911596363716e-06
C16orf53	1038.38682504517	-0.110410773763097	0.105814053293488	-1.04344149313381	0.2967438646539	0.402679296599947
C16orf54	26.4300319982151	1.29461014718032	0.169546297824833	7.63573232674091	2.24540401471021e-14	8.05936582751161e-13
C16orf55	198.092130506746	0.621438872841078	0.0967965561128687	6.42005147493528	1.36228273218028e-10	1.97246748609966e-09
C16orf57	880.502798084033	0.185753526704865	0.0632535108900389	2.93665164338123	0.00331776564884512	0.00826397995170994
C16orf58	1762.56319491797	-0.0350751985312655	0.0509872945902562	-0.687920369439811	0.491502928532995	0.604688349136134
C16orf59	73.4773961597164	0.218179809100105	0.173592231450243	1.25685237914948	0.208807095068379	0.301240450696939
C16orf61	406.115303574153	0.146469159185157	0.0726318273012798	2.01659747010904	0.0437375372538509	0.0790304270410021
C16orf62	1549.87964413466	-0.0497004989911271	0.0400724524850405	-1.24026596599449	0.214877036314626	0.30849984965517
C16orf63	579.889507767525	0.207905992607156	0.042927844628036	4.84315004418771	1.27796708277227e-06	7.58681598948709e-06
C16orf68	182.610946708879	-0.124122450154428	0.073860670478928	-1.68049449523802	0.0928611444462775	0.151417586531117
C16orf7	800.204051863854	-0.234043446851972	0.080182435003248	-2.91888674673564	0.0035128382243572	0.0086836638999719
C16orf70	469.585458188992	0.0665199110381528	0.057388378219204	1.15911815427279	0.246408026873542	0.345225513460158
C16orf71	35.9333661916952	1.40161351629621	0.183775894561433	7.62675387673148	2.40738578696819e-14	8.57505325183194e-13
C16orf72	870.122302765325	0.0468998810729776	0.0449648518622034	1.04303426188758	0.296932424833304	0.402847640237277
C16orf73	1.51571055990685	-0.452139011725865	0.417214545026854	-1.0837086508975	0.278493998733004	0.382485233855854
C16orf74	25.6510222321853	0.921151542641806	0.22160431547729	4.15674009171634	3.22820892233634e-05	0.000136439707577022
C16orf75	76.0791363479902	0.863691123622037	0.201983193637986	4.27605439871413	1.90234758051592e-05	8.4822428054608e-05
C16orf78	0	NA	NA	NA	NA	NA
C16orf79	82.3585249285518	-0.352006608387463	0.180345369508068	-1.95184722151524	0.0509563459798082	0.0901187557369914
C16orf80	826.861952130607	-0.00132108530706479	0.0639312847221887	-0.020664144523382	0.983513571433984	0.991451106983058
C16orf81	1.90237460034395	-1.07724935843283	0.382871791332094	-2.81360335971695	0.00489896340783643	0.011621547025731
C16orf82	0.232233084677136	0.769262222948671	1.71084297074292	0.449639292503056	0.652970551236419	0.752371964981987
C16orf86	117.220602940619	-0.121731327186553	0.107778145107096	-1.12946207290534	0.258702960307133	0.359630176053165
C16orf87	155.637781644461	-0.238547778840144	0.0952065245097044	-2.5055822599199	0.0122249957943998	0.0259220825264684
C16orf88	364.543034341831	0.00456051164756416	0.091179886567728	0.0500166409417128	0.960109127364872	0.978971679472557
C16orf89	250.15058779848	1.28269087192577	0.235545637300168	5.44561506902872	5.16266751457185e-08	4.2517687276052e-07
C16orf90	0.0101888479899782	-0.122928990369051	3.58413516627555	-0.034298089962046	0.972639447964554	NA
C16orf91	204.687209380935	-0.0487348999488377	0.0679859027872252	-0.716838314280577	0.473473867559195	0.58756168913691
C16orf92	1.81019932570994	-1.14080697796785	0.323671447212386	-3.5245833013478	0.00042414943081522	0.00134510218953181
C16orf93	88.8921031377731	0.633014250153834	0.138701368617136	4.56386448428764	5.02205024995801e-06	2.57930738714949e-05
C17orf100	176.713386142238	-0.329593694747551	0.0827683073071569	-3.98212438396758	6.8302016335834e-05	0.000267329554641359
C17orf101	271.324868454981	0.310671153109712	0.0832422577565168	3.73213271098945	0.000189865420800811	0.00065986246041996
C17orf102	13.5445348848583	-0.644190846235818	0.23222101101126	-2.77404203620741	0.00553645237943372	0.0129356493055331
C17orf103	378.262631463347	0.052681522101316	0.0617628798624159	0.852964146404285	0.393679187167911	0.507047974977227
C17orf104	28.405682059469	-0.0678625997838719	0.104983109366481	-0.646414458415147	0.518010979300073	0.629815295792742
C17orf105	0.0151939055243267	0.0560505633704	3.58413516627555	0.0156385182952363	0.987522776278877	NA
C17orf106	190.905922820686	0.41418566397219	0.106031695560408	3.90624389983673	9.37418953139463e-05	0.00035416379195527
C17orf107	25.1106401561967	-0.593681132442571	0.204372081139654	-2.90490329761279	0.00367366582292102	0.00903990055926559
C17orf108	466.863617387205	-0.0567108858202706	0.109124015009205	-0.519692075254807	0.603278211210328	0.707500035380365
C17orf28	636.958262948624	-0.160057891033007	0.134788828391546	-1.18747149109463	0.235041695295169	0.332132227396506
C17orf37	785.337427977451	0.151170522203821	0.069004782106314	2.19072530322487	0.0284716768795611	0.0544721064041107
C17orf39	375.660389954551	-0.10954593967525	0.0414916480421833	-2.64019254101159	0.00828589377808622	0.0184704944469034
C17orf42	122.998269491768	0.269749695832686	0.059613639803372	4.52496604338237	6.04052034837973e-06	3.04316185122997e-05
C17orf44	29.5818588901782	0.417995713213823	0.105231399690235	3.97215768719468	7.12245445221315e-05	0.000277495387974294
C17orf46	0.40974562508429	0.647875001047427	0.467194435180391	1.38673526964693	0.165522501653707	0.247900047240915
C17orf47	1.67739571329821	-0.280419960310691	0.275747390244063	-1.0169451107497	0.309179541793256	0.416747330578306
C17orf48	112.435659831534	-0.00154839114988006	0.0624260810826491	-0.0248035936747346	0.980211624603614	0.990146916032635
C17orf49	1030.94479077247	-0.00459635040416696	0.0899067376643548	-0.0511235367178634	0.959227080924635	0.97860487820332
C17orf50	1.69299986502649	-0.216335906100414	0.288334931116056	-0.750293782522446	0.453077786418972	0.567003089669641
C17orf51	740.927488111964	-0.270305735684554	0.10116459136002	-2.67194017245225	0.00754140926446656	0.0169806326137538
C17orf53	40.6250197838168	0.565864563863594	0.158026874116666	3.58081223226523	0.000342527751137184	0.00111242848765926
C17orf54	0.0413724392002586	-0.239537361871439	3.25185594883933	-0.0736617382934618	0.941279544460436	NA
C17orf55	3.15946360303878	0.24733117471919	0.304698088657486	0.811725389578064	0.416949222257705	0.531245197430831
C17orf56	348.628354852115	-0.0268762040280426	0.0941941089632163	-0.285327865233461	0.775392966384469	0.85211816635459
C17orf57	13.7857745835169	0.37197107320456	0.172539876571472	2.15585568157328	0.031094935990378	0.0588182454028998
C17orf58	208.206799854593	0.124706187069854	0.0699263887915906	1.7833923533722	0.0745224571134099	0.125205061644321
C17orf59	276.763375686273	-0.151897370276792	0.0850078149988634	-1.7868635992917	0.0739595370344619	0.12444056555149
C17orf60	37.0907017326168	1.04556783444801	0.18023439480557	5.80115596457565	6.58593064336725e-09	6.63765446660187e-08
C17orf61	394.220280486547	0.0567768667782131	0.0981108393253954	0.578701264494398	0.562790762624399	0.671535328526986
C17orf62	1434.65693560071	0.225334363952725	0.0704855968593991	3.19688523603212	0.0013892018576969	0.00382372352075937
C17orf63	669.001481677484	-0.0837065403126007	0.0591831159465805	-1.41436521166198	0.157254698916324	0.237281472086353
[truncated: 18,502 more rows]

## Sheet: DEG
gene_name	baseMean	log2FoldChange	lfcSE	stat	pvalue	padj
A2LD1	52.1615548871413	1.43976	0.172486979185599	8.3470420688732	6.9993791982652e-17	4.61762e-15
A2M	17106.9830579143	0.79929	0.140347365295511	5.69508144966933	1.23313038556785e-08	1.16864e-07
A4GALT	123.008156731446	0.744697	0.16349269015472	4.55492794925954	5.24035369681532e-06	2.67821e-05
ABCA13	28.6184805823761	3.00577	0.317387929881188	9.47032372627372	2.78977745551879e-21	5.68144e-19
ABCA5	166.780813486884	1.16739	0.256582296977526	4.5497801778634	5.37019865452763e-06	2.73785e-05
ABCA8	615.343536445656	0.903962	0.206240198151387	4.3830562663795	1.17025872585839e-05	5.50627e-05
ABCC3	405.226249006782	3.70333	0.38975645914606	9.50166278366389	2.06565149708936e-21	4.39796e-19
ABCC8	343.816532393407	-1.69364	0.227919888889759	-7.43084253711785	1.07908108803969e-13	3.15408e-12
ABHD15	215.109599929771	0.601792	0.0866317014648996	6.94655742405485	3.74307612091592e-12	7.70662e-11
ABI3	428.640265642006	0.780037	0.164681393732802	4.73664442046568	2.17285914824866e-06	1.21888e-05
ACAA2	703.690586183485	1.01133	0.137350530977931	7.36312987099308	1.79647437788403e-13	4.95711e-12
ACAP1	25.4173401050641	2.16973	0.23985542128911	9.04600322283161	1.48297085983432e-19	1.93299e-17
ACAP3	3173.69090131055	-0.701234	0.138217545300815	-5.0734082660526	3.90752889041084e-07	2.61937e-06
ACCN2	2402.39480921789	-1.11745	0.130372291769913	-8.57122071912751	1.02393779697476e-17	8.37751e-16
ACCN3	144.242580202512	-0.847896	0.174025035340049	-4.87226396186006	1.10326628369648e-06	6.6637e-06
ACCN4	1344.88078230918	-1.97078	0.229072762329233	-8.60330298002827	7.74541561281853e-18	6.65679e-16
ACCS	104.516956934276	1.16535	0.202735405868273	5.74814182648669	9.02295414452303e-09	8.8049e-08
ACE	221.878872193097	1.36439	0.219208268577336	6.22416765796922	4.84119172715866e-10	6.32088e-09
ACOT11	85.0571389727632	1.09878	0.21058327691241	5.21779545477074	1.81065257202269e-07	1.3073e-06
ACOT12	1.62979858289022	3.55836	0.778607130694468	4.57015910911658	4.87354063841029e-06	2.51129e-05
ACP5	75.121807592637	1.7116	0.285806786987415	5.98864466777943	2.11596878060659e-09	2.39981e-08
ACPP	14.1493547672757	1.45605	0.272094285830878	5.35128314458656	8.73327495151619e-08	6.81778e-07
ACSL1	1081.45168894477	0.690161	0.161832253853718	4.26466678311206	2.00200752802087e-05	8.87172e-05
ACSL6	557.854299172851	-0.796166	0.18023392294757	-4.4174062822888	9.98923592222994e-06	4.78421e-05
ACSM3	1.98159422511259	1.17674	0.265802916984192	4.4271228030559	9.54983688591404e-06	4.59137e-05
ACSS3	313.780657698724	1.92361	0.239209600691354	8.04152547873496	8.87268927900166e-16	4.42124e-14
ACTL6B	260.946726036237	-1.28966	0.263572164064722	-4.89300008780602	9.93103621832227e-07	6.08264e-06
ACTN1	2646.6841417788	1.32343	0.214185485814909	6.17887742524279	6.45589933380615e-10	8.17247e-09
ACVR2B	633.35522387329	-0.791417	0.111808636244276	-7.07831729848841	1.45915330696716e-12	3.27802e-11
ADAM11	241.178268657762	-1.18487	0.244086212257131	-4.85431562066471	1.20803205688158e-06	7.21278e-06
ADAM12	169.418037120708	2.32578	0.315195808657103	7.37884570064925	1.59667742325469e-13	4.45169e-12
ADAM19	264.532422412069	0.995727	0.213588878112497	4.66188400405485	3.13327781957989e-06	1.68984e-05
ADAM29	3.51764183061557	-2.40401	0.355807740508397	-6.75647352211069	1.41390804905041e-11	2.54396e-10
ADAM33	113.452428557093	2.11412	0.28047339218133	7.53768863641271	4.78374367771526e-14	1.54798e-12
ADAM6	333.278125892423	3.79223	0.411497724809758	9.21568108818789	3.09308346165691e-20	5.03931e-18
ADAM9	2560.47513465963	0.601797	0.121529185691689	4.95187121827648	7.35032430976479e-07	4.64314e-06
ADAMDEC1	25.9246234233684	3.56629	0.609725549219372	5.84900542167431	4.94520972207369e-09	5.12464e-08
ADAMTS14	96.4072818103862	1.92992	0.295012240849313	6.54182159019206	6.07739792406804e-11	9.53653e-10
ADAMTS18	26.854143754298	2.13034	0.465501387040813	4.5764395238541	4.72956348424641e-06	2.44652e-05
ADAMTS19	28.0638429984407	-1.90536	0.295876594735356	-6.43969807025112	1.19711399889322e-10	1.75365e-09
ADAMTS20	42.2299118208662	-2.26591	0.456870311590983	-4.95964265732875	7.0622969357131e-07	4.48388e-06
ADAMTS3	67.6990684410187	2.10961	0.328795845298001	6.41617248515211	1.39743112295701e-10	2.01868e-09
ADAMTSL1	109.099223695833	1.71551	0.267652396024109	6.40947854756687	1.4601819160329e-10	2.10284e-09
ADAMTSL4	102.263197302499	1.80168	0.197462711556825	9.12417780857786	7.22828244459284e-20	1.02598e-17
ADAP2	378.673380725562	0.800237	0.138033460565095	5.79741012560663	6.73468513785958e-09	6.773e-08
ADHFE1	503.694247033457	-0.82549	0.147142819338293	-5.61012987488476	2.02174830636794e-08	1.82113e-07
ADIG	3.44450869006273	2.37491	0.403031629137992	5.89261661991273	3.80127639956157e-09	4.04893e-08
ADM	147.822590409899	1.40165	0.272482162504504	5.14399226502817	2.68960612410267e-07	1.86916e-06
ADORA1	1406.55971690315	0.938426	0.194729725130438	4.81912003289017	1.44192786554521e-06	8.43195e-06
ADPRH	165.68167650594	1.03003	0.125904891641502	8.18099904883228	2.8150012871777e-16	1.5697e-14
ADRA1D	44.9243415099741	1.44439	0.265398596967582	5.44235424631059	5.25809790953458e-08	4.31708e-07
ADRBK2	699.355602879597	-0.682925	0.104525397395996	-6.53357814629671	6.42166621772475e-11	1.00431e-09
ADSSL1	84.742179933665	0.814183	0.148524767047845	5.481802816324	4.21013334267516e-08	3.53727e-07
AEBP1	5118.74948970595	2.12375	0.288888300985228	7.35144225288118	1.96079477040581e-13	5.32427e-12
AFAP1L1	224.901567016194	1.01731	0.192553110966851	5.28329241769847	1.2688261875487e-07	9.50529e-07
AFF2	251.971417647903	-1.42472	0.251758969132282	-5.65908314562674	1.52183817106388e-08	1.41786e-07
AFP	2.49500888656854	4.25552	0.779119228668817	5.46196581240712	4.70890778217069e-08	3.9142e-07
AGA	365.658488546249	0.848135	0.101404750962085	8.36386295401782	6.06974210436695e-17	4.12039e-15
AGAP4	306.653152560567	-0.626423	0.141687607103308	-4.42115906853453	9.81728674374203e-06	4.71029e-05
AGBL2	15.3252564146224	2.26151	0.29404699849584	7.69098995475952	1.46000898242618e-14	5.50397e-13
AGR3	4.56641065485738	6.01362	1.01693025042151	5.91349973169337	3.34914073254176e-09	3.61669e-08
AGTR1	6.3252098450282	1.5685	0.348776553213993	4.49715585892274	6.88685047128472e-06	3.40994e-05
AGTRAP	619.99786570502	0.609441	0.103892325890032	5.86607967585335	4.46219436660501e-09	4.65782e-08
AHNAK2	318.962705003799	1.26535	0.259464713908755	4.87675514989079	1.0784516414785e-06	6.537e-06
AHR	480.674796712554	1.14506	0.196125948501984	5.83839241659229	5.27068993376118e-09	5.43188e-08
AIF1	982.455188937466	0.762521	0.167670866029523	4.54772603347839	5.42286647557225e-06	2.7602e-05
AIM1	109.115146232749	1.67687	0.272346282417636	6.15712535261126	7.4077215298972e-10	9.24657e-09
AJAP1	110.562537815755	-1.42262	0.221441377533594	-6.42437690550062	1.32410757052154e-10	1.92314e-09
AK3L1	222.037886241608	0.874182	0.181573543387412	4.81447849514268	1.47584794937142e-06	8.60765e-06
AK7	15.6277398171095	2.84539	0.390996594322711	7.27726673092878	3.40651322457495e-13	8.81553e-12
AKAP14	3.43913019668375	3.17345	0.679100306269937	4.67302031714222	2.96802393437352e-06	1.60777e-05
AKAP6	2542.63545934963	-0.670295	0.112863653317279	-5.93898122186783	2.86798710633568e-09	3.14974e-08
ALCAM	4351.13275079083	-0.588475	0.118753735152855	-4.95541998548866	7.21742197221017e-07	4.56998e-06
ALDH1A3	113.89350643356	3.3701	0.443897846720159	7.59206241296259	3.14853286796564e-14	1.0824e-12
ALDH2	7426.59126380629	-0.62601	0.125465304405559	-4.98950817948562	6.05332113143702e-07	3.88674e-06
ALDH3A1	17.0957285449082	3.63186	0.326726756775633	11.1158928793202	1.04995011028185e-28	1.31146e-25
ALDH3B1	267.952980799176	0.800215	0.129530332885718	6.17782057569544	6.49925144828241e-10	8.20552e-09
ALDH5A1	2621.18872668847	-0.803742	0.104167530933911	-7.71585735666517	1.20171652618281e-14	4.68095e-13
ALDH6A1	1329.89925580655	-0.668067	0.142442747478215	-4.69007364044239	2.73106740883283e-06	1.49356e-05
ALDOC	18871.7828756513	-1.0208	0.177386241230817	-5.75466363665989	8.68144767752822e-09	8.50709e-08
ALK	130.412538653759	1.3651	0.279286093932276	4.88781588400119	1.01960816094264e-06	6.22671e-06
ALOX12P2	5.57706027746175	2.32418	0.367952230508693	6.31651548946544	2.67526646041827e-10	3.65068e-09
ALOX5	361.700222737097	1.04727	0.161285697411915	6.49325739044024	8.39999918425287e-11	1.27642e-09
ALOX5AP	594.86643006327	1.20065	0.173495506317827	6.92036749993725	4.50473484610793e-12	9.1244e-11
ALOXE3	5.48014439002048	-1.28687	0.272300344993424	-4.72590882026686	2.29088433029204e-06	1.27403e-05
ALPK1	178.54170938887	1.39879	0.14920884656692	9.37473855927386	6.93474178094646e-21	1.33948e-18
ALPK3	281.953738707917	1.10037	0.159343406625323	6.90564361069381	4.99763211114819e-12	9.98248e-11
ALS2CR12	10.416426472185	1.30592	0.252114666647471	5.17987209543063	2.22038091042182e-07	1.5752e-06
AMH	99.8312689404631	-1.2972	0.263005400884293	-4.93223602667162	8.12936010205468e-07	5.07367e-06
AMICA1	32.164568893746	1.73773	0.301358304294576	5.76631327940956	8.10243849226107e-09	8.01094e-08
AMIGO2	170.135868976457	1.98554	0.244383587394822	8.1246664353497	4.48594376536226e-16	2.37426e-14
AMPD3	374.419778403442	0.762457	0.142311407412102	5.35766806641382	8.43029363742159e-08	6.60326e-07
AMZ1	163.759877168261	-1.40516	0.171434012561386	-8.19648284028858	2.47522598044108e-16	1.39686e-14
ANG	64.3744841906895	1.36564	0.182024271285897	7.50249628207791	6.26137908528922e-14	1.95522e-12
ANGPT1	217.205728070498	1.91692	0.266681711946616	7.18804801629578	6.57241504153371e-13	1.59509e-11
ANGPT4	3.79040637335295	-1.31204	0.309084861246035	-4.2449153555195	2.18675952223957e-05	9.61538e-05
ANGPTL2	3476.74205394715	-0.86165	0.15283473082651	-5.63778798085611	1.72248396741973e-08	1.58051e-07
ANGPTL6	18.593707564306	1.03511	0.213862490940459	4.8400847801445	1.29783750133807e-06	7.68879e-06
ANKK1	3.20002184159404	1.99363	0.402492814888798	4.95320662549009	7.30003857496942e-07	4.61605e-06
ANKRD13B	753.792253902636	-0.589199	0.108408250887296	-5.43499847402468	5.47969014064169e-08	4.47743e-07
ANKRD16	193.817958252886	-0.733769	0.0841519777302895	-8.71957201746936	2.79255322710399e-18	2.71095e-16
ANKRD20A3	75.1895781189559	-1.06888	0.240560093269925	-4.44330675480264	8.8586722799871e-06	4.2899e-05
ANKRD20A4	7.35051396488357	-1.70779	0.362993339511524	-4.70474570560423	2.54182577498439e-06	1.40111e-05
ANKRD20B	26.941479492558	-1.01268	0.218572557605243	-4.63315114395691	3.60141402654322e-06	1.91476e-05
ANKRD26	254.118812127378	-0.713427	0.0957299753709374	-7.45249493905004	9.15913724198288e-14	2.73581e-12
ANKRD28	1386.778596824	-0.62569	0.0855020869267733	-7.31783812723672	2.51997573381681e-13	6.69706e-12
ANKRD36	219.188264916444	-0.58643	0.134057595677355	-4.37446204418891	1.21732300507317e-05	5.70052e-05
ANKRD36B	30.0029314445816	-0.756564	0.167097327824139	-4.5276818154033	5.96342851873813e-06	3.00756e-05
ANKRD45	95.0006848232663	1.99309	0.240249407582849	8.29592541074922	1.07743125906275e-16	6.75142e-15
ANKRD5	20.3253859955524	2.1115	0.260999176143315	8.09006221509361	5.96342633137324e-16	3.08648e-14
ANKRD53	24.9803987301993	2.07084	0.246797150197654	8.39087036178421	4.82556217407302e-17	3.37357e-15
ANKRD58	26.7458318048614	0.823075	0.180459016040861	4.56100742418753	5.09087808112042e-06	2.61108e-05
ANO6	1767.60568959971	0.586266	0.128897495292146	4.54830836174446	5.40788569162935e-06	2.75482e-05
ANO7	18.8310543712626	1.12899	0.21233422874966	5.31704564386662	1.05465619309398e-07	8.09174e-07
ANO9	2.18925170734362	2.9188	0.514322452070434	5.67503079900197	1.38663705384336e-08	1.29965e-07
ANTXR2	377.809338428304	1.03324	0.142961669271021	7.22741131222656	4.92287416723441e-13	1.22328e-11
ANXA1	2785.08015790617	3.11166	0.259200115157863	12.0048556648646	3.35047911433653e-33	8.9678e-30
ANXA2	2042.97850276768	1.67225	0.203935779585089	8.19988711729053	2.40612864174769e-16	1.3661e-14
ANXA2P1	12.0915547309014	1.60259	0.232496737249958	6.89294676737121	5.46483289595669e-12	1.07439e-10
ANXA2P2	712.857777787946	1.85752	0.226175573368561	8.2127162824888	2.16240075715853e-16	1.24495e-14
ANXA2P3	1.34700484355201	2.54453	0.467785563977313	5.43952793770447	5.34219318678302e-08	4.37926e-07
ANXA4	448.335792337727	0.91578	0.110034670771051	8.32265175057274	8.6016890376961e-17	5.55728e-15
ANXA5	6749.05260314707	1.07509	0.128606489858441	8.35951716885227	6.297546094309e-17	4.24427e-15
AOC2	24.9929613767007	-0.864784	0.173512196618245	-4.98399348177419	6.22851785164375e-07	3.98557e-06
AOX1	33.1929846730228	2.03569	0.310642511476884	6.55314636606953	5.63372481105073e-11	8.91083e-10
AP1S3	25.9875637191524	1.33408	0.172969649478788	7.7127758217772	1.23110230058198e-14	4.76569e-13
AP3B2	741.318047663368	-0.769896	0.134410837959217	-5.72792766011301	1.01664898766832e-08	9.82866e-08
APBB1IP	873.993912881322	0.829843	0.157329464786057	5.27455585077768	1.33077986986072e-07	9.92971e-07
APC2	8236.31890084916	-0.581693	0.0988346378100635	-5.88551649006181	3.96812817703597e-09	4.19707e-08
APCDD1L	22.1314924120695	4.80309	0.802322236981664	5.98648262424746	2.14427484068202e-09	2.42603e-08
APITD1	183.350509543311	0.588439	0.0785460680696145	7.49164769972836	6.80142861006171e-14	2.10631e-12
APLF	28.7396034834306	0.684247	0.127403510882331	5.37070369078942	7.84299883647603e-08	6.18982e-07
APLN	1563.31576473628	1.06002	0.200065549898686	5.29837136487276	1.16840145623994e-07	8.83778e-07
APLNR	5139.53112207793	1.49582	0.284869546691299	5.25089307314351	1.51363531127923e-07	1.11083e-06
APOB	9.22810399865028	2.36956	0.364580514130467	6.49941905677613	8.063077018809e-11	1.22721e-09
APOB48R	210.985813403924	1.06515	0.160562463160253	6.63387412097138	3.26988717628229e-11	5.43061e-10
APOBEC3B	28.2183930451373	1.01296	0.217268129651951	4.66227539029778	3.12732321134378e-06	1.68712e-05
APOBEC3C	135.416871742959	1.53608	0.176559819433426	8.70006287445744	3.31700342096203e-18	3.13876e-16
APOBEC3D	16.6261918202157	1.47192	0.214247441156354	6.87016936374945	6.41257259458558e-12	1.23974e-10
APOBEC3F	54.1475362125619	1.40153	0.176838171788842	7.92552211130272	2.27189718276641e-15	1.04585e-13
APOBEC3G	133.745883352992	1.47759	0.163720316328668	9.02508157605422	1.79561537772651e-19	2.28862e-17
APOBEC3H	3.38102302621267	1.82691	0.296665089907129	6.15815261029119	7.3598416633956e-10	9.19907e-09
APOC2	908.639529451756	1.21648	0.196396558917499	6.19401925363599	5.86490579105704e-10	7.52121e-09
APOL1	356.848474741673	1.60087	0.19467364413285	8.22333766721277	1.97916592111998e-16	1.1516e-14
APOL2	1520.97997451917	0.71734	0.158244512106008	4.53310907135357	5.81217832358875e-06	2.93602e-05
APOL3	305.200928956361	0.695906	0.140938114049205	4.93766916769816	7.90618160674798e-07	4.95585e-06
APOL4	379.304482855387	1.6743	0.278122108723941	6.02001534023495	1.74400541700811e-09	2.01951e-08
APOL6	825.22116478273	1.02906	0.155311584442015	6.625758817203	3.45468843387799e-11	5.69279e-10
AQP1	19485.2259556738	1.56404	0.283701077389225	5.51299531307535	3.52777630200505e-08	3.01535e-07
AQP4	30249.0448733707	0.981692	0.215275775010391	4.56016131254138	5.11143404160475e-06	2.61947e-05
ARAP3	405.095127722615	1.1361	0.199874060036153	5.68407033410217	1.31526144216037e-08	1.23461e-07
ARG1	1.76607398153468	2.17747	0.478596213345038	4.54970035141878	5.37223620946631e-06	2.73815e-05
ARHGAP11A	190.285936238297	0.849892	0.19372806002886	4.3870357627246	1.14905902374331e-05	5.41877e-05
ARHGAP15	68.8944436186332	1.16116	0.17436313828816	6.65941124067502	2.74926675410336e-11	4.64894e-10
ARHGAP18	260.226708994172	1.44561	0.155387087114801	9.30331355019207	1.36135523467264e-20	2.40626e-18
ARHGAP25	300.133250112168	0.941041	0.128332814327933	7.33281970507498	2.25360029994391e-13	6.03192e-12
ARHGAP30	487.196629638214	0.7711	0.15197941370971	5.07371218067852	3.90129008158628e-07	2.61613e-06
ARHGAP31	2454.90635839737	-0.668803	0.0998459925650619	-6.69834875296162	2.10787731493022e-11	3.66311e-10
ARHGAP32	1967.26882324965	-0.909181	0.0928714137909836	-9.78967569862631	1.24695184634386e-22	3.487e-20
ARHGAP9	187.913149187457	0.713623	0.148062715562541	4.81973753571056	1.43747209052606e-06	8.41114e-06
ARHGDIB	1858.72022010856	0.804087	0.126484439776089	6.35720040220543	2.05463871716591e-10	2.86213e-09
ARHGEF17	2455.67722297511	-0.62121	0.105723957486795	-5.87577690879159	4.20864800634389e-09	4.42002e-08
ARL11	55.4057889923961	1.06593	0.152987353878578	6.96742398066439	3.22796768625517e-12	6.74239e-11
ARL4C	1223.08447696791	1.07446	0.221822656589317	4.84377918041481	1.27392509181436e-06	7.56522e-06
ARL9	5.85416267148794	2.70422	0.42527611241471	6.35873963809049	2.03415852475158e-10	2.83994e-09
ARMC2	46.8912422065848	1.06092	0.152801085774491	6.94311609405752	3.83543965868794e-12	7.86844e-11
ARMC3	56.6622684808621	3.29359	0.447756312804406	7.35577094146466	1.89828293350645e-13	5.17703e-12
ARMC4	29.5888442086589	1.79156	0.304081937862125	5.89169365891693	3.82257329449176e-09	4.0693e-08
ARNTL2	46.1444309221486	1.41853	0.235562667984451	6.02185843449545	1.72425677370302e-09	1.99911e-08
ARPC1B	1396.06022501625	0.761364	0.133771461612485	5.69153005224707	1.25905990014521e-08	1.1872e-07
ARPP21	691.846260567712	-1.24846	0.16793720885489	-7.43409778949932	1.05284063444526e-13	3.09095e-12
ARRDC4	1247.49358336157	1.04134	0.160028834682104	6.50721143739705	7.65586216083577e-11	1.1719e-09
ARSD	393.487743161655	1.44098	0.17815165749772	8.08848112252759	6.04133481777335e-16	3.10963e-14
ARSE	56.6282964811204	1.20306	0.20360941092973	5.90864369015744	3.44935865643794e-09	3.70781e-08
ARSF	54.8216235673061	2.08431	0.399117416799143	5.22228707937586	1.76726706646335e-07	1.27794e-06
ARSJ	116.27456365481	1.843	0.276482768187036	6.66586315114521	2.63114345218641e-11	4.47132e-10
ASB13	842.473138547738	-0.816837	0.0980441545077134	-8.33131908586209	7.99465343454825e-17	5.23734e-15
ASB9	9.51575094747626	1.01244	0.189864449988831	5.3324250083686	9.69097950425932e-08	7.49052e-07
ASCL2	13.5345458213945	1.3462	0.194621241747343	6.91700595112117	4.61288717134119e-12	9.32331e-11
ASF1B	139.34820041669	1.17438	0.226555064286051	5.18363213533256	2.17605933434047e-07	1.5461e-06
ASPN	28.5295149390301	1.83403	0.269797763626342	6.7977809677378	1.06242812949805e-11	1.96502e-10
ATAD3C	39.3153215992323	0.988874	0.231912706329844	4.2639925374794	2.0080615323015e-05	8.89434e-05
ATCAY	2844.58445648933	-1.19642	0.18650353921861	-6.41501212422473	1.40811654750804e-10	2.03255e-09
ATF5	499.145032097802	0.702317	0.127276247817654	5.51804865486683	3.42784538844764e-08	2.93529e-07
ATG9B	32.2269534785393	1.58203	0.249576681530322	6.33887062612019	2.31455485782482e-10	3.19334e-09
ATOH8	1116.20606971188	-1.25232	0.175709610209029	-7.12719774076394	1.02432886398098e-12	2.38704e-11
ATP1A3	5412.34797940938	-1.20269	0.196629321116332	-6.116545410116	9.56256465869877e-10	1.16872e-08
ATP1A4	9.47971818937159	-1.95959	0.367796834992541	-5.32791039680513	9.93491112697368e-08	7.66326e-07
ATP2A3	87.7472656112095	1.07158	0.198317562236632	5.40337841959363	6.53972881766719e-08	5.26325e-07
ATP2B3	181.238102938696	-1.73005	0.317299598612641	-5.45242776937644	4.96867564829486e-08	4.10463e-07
ATP6V1G2	2039.31253577154	-1.11643	0.153531766894125	-7.27168148035163	3.55039973670688e-13	9.16257e-12
ATP7B	144.757326355641	-0.673575	0.105123776124982	-6.40744290567555	1.47980473747197e-10	2.12457e-09
ATP8A1	1682.56460069466	-0.723977	0.15597080989088	-4.64174644291675	3.45476647593158e-06	1.84675e-05
ATP8A2	65.8835955089247	-1.56639	0.350969208181573	-4.46305293598259	8.08000810229336e-06	3.95783e-05
ATP8B1	39.5536058836392	0.900499	0.191288364851144	4.70754888514449	2.50713168796823e-06	1.38239e-05
ATP8B3	26.1226286138623	0.649915	0.144986713303305	4.48258128463133	7.37455385288364e-06	3.63222e-05
ATRNL1	662.003826524467	-0.809636	0.187786059450038	-4.31148316957425	1.62163119586565e-05	7.34596e-05
AURKA	105.576937308676	0.999144	0.177008919554954	5.64459736350572	1.65568263542291e-08	1.52812e-07
AURKC	21.5273306922776	0.946941	0.223459938976724	4.23763305421616	2.25888556161736e-05	9.90695e-05
AVIL	109.243398110769	1.53475	0.245674354564066	6.24707071179751	4.18221755295285e-10	5.51429e-09
B2M	26553.6380364789	0.814862	0.125061460167399	6.51569246207514	7.2355083474273e-11	1.11606e-09
B3GALT4	129.877407981991	0.800456	0.135888775873733	5.89052658179597	3.84966938912433e-09	4.0935e-08
B3GNT5	313.259464608629	1.39681	0.180113912159311	7.75514559878213	8.82421759242186e-15	3.57858e-13
B3GNT7	152.669646708119	1.42781	0.281846066162598	5.06592281469864	4.06426584297245e-07	2.71279e-06
B3GNT8	7.0983896040495	1.32781	0.224998818057277	5.90138761351982	3.60456929222961e-09	3.85475e-08
BACE2	196.144752342071	1.30607	0.162195046895403	8.0524712322304	8.11388135270444e-16	4.07565e-14
BAI1	2745.93947524283	-1.00443	0.217899581932365	-4.60961812989612	4.03409263134607e-06	2.1142e-05
BAI3	935.098414195232	-0.793517	0.114993847299557	-6.90052041958552	5.18123728129297e-12	1.02509e-10
BANK1	21.0286224244208	2.17739	0.34517664609001	6.30803900450498	2.82593008502505e-10	3.83116e-09
BATF	18.2333327492977	1.83527	0.270276543016548	6.79035872133145	1.1185506721885e-11	2.06068e-10
BATF2	122.616546352365	1.25815	0.191979384368005	6.55354811726917	5.61858174669111e-11	8.90607e-10
BATF3	81.1120437378228	0.851228	0.19832714000046	4.29203741074022	1.77041110477938e-05	7.96791e-05
BCAN	70896.2274966923	-0.968599	0.156780348384344	-6.17806327519239	6.48927082828429e-10	8.20398e-09
BCAS4	550.0548780154	0.802905	0.126149036599756	6.36473154929295	1.95631589906009e-10	2.74558e-09
BCAT1	874.767871604181	1.58282	0.25768812347402	6.14236999835038	8.12992097965186e-10	1.00676e-08
BCL2L12	76.3464431492141	0.982444	0.123392109275009	7.96196523560184	1.69328056227752e-15	7.93133e-14
BCL2L14	2.49248801230192	1.31539	0.299307937121371	4.39476163677986	1.10894368225417e-05	5.25074e-05
BCL3	146.993115703549	0.7054	0.139973367058041	5.03953126511877	4.6667339115372e-07	3.0744e-06
BCL7A	1083.92531441418	-0.982354	0.129543701410688	-7.5831835472546	3.37177307119984e-14	1.14653e-12
BCO2	64.2546466998086	1.14198	0.1955585656857	5.83956925321685	5.2335958380834e-09	5.3996e-08
BCR	4494.29257199547	-0.993491	0.112655049207913	-8.81887764244227	1.15612690009915e-18	1.2034e-16
BDKRB2	43.2829561007508	1.30806	0.275454061638138	4.74874179081114	2.04686072209333e-06	1.15304e-05
BEND4	26.4053407920004	-1.4974	0.282197316469192	-5.30620320959492	1.11932171071525e-07	8.51466e-07
BEND7	368.314371655344	-0.679186	0.109828506851789	-6.18406026554322	6.24734994127584e-10	7.93562e-09
BEST4	14.3779391938481	1.83957	0.257830588828213	7.13478809594438	9.69363798190312e-13	2.27025e-11
BEX1	2640.28807022478	-0.835071	0.122767764334103	-6.80203696816863	1.03150118852612e-11	1.91349e-10
BGN	2395.43525236817	1.41758	0.191258083889905	7.41187025518362	1.24530561205247e-13	3.56759e-12
BHLHE40	1362.29752241365	0.788799	0.180261688818235	4.37585322735035	1.20958388506763e-05	5.67362e-05
BHLHE41	2428.38474165758	0.690816	0.143641113548265	4.80932054090805	1.51444189104474e-06	8.79832e-06
BICD1	241.746157635237	0.701119	0.160095816205995	4.37937167665027	1.19021983139129e-05	5.59176e-05
BID	1118.72888378997	-0.587415	0.10296426355967	-5.70503529115883	1.16318986093327e-08	1.10909e-07
BIN2	272.173303315941	0.730899	0.140110127644928	5.21660568823821	1.82231616220995e-07	1.31471e-06
BIRC3	59.2864134169519	1.27305	0.226560932601006	5.61903363369623	1.9202847582149e-08	1.74399e-07
BLNK	178.428261354754	0.790266	0.172684663491328	4.57635210392111	4.73153931300094e-06	2.44687e-05
BMP2	936.836945734137	-1.37237	0.215453251255719	-6.3696904199532	1.89410126446184e-10	2.66826e-09
BMS1P5	57.6015455715871	-0.794544	0.128640059603488	-6.17648618182615	6.55439432414835e-10	8.26401e-09
BNC2	79.3810703647306	1.21493	0.197791656896424	6.14247046175041	8.1247790179801e-10	1.00676e-08
BRCA1	272.361179142048	0.870136	0.114451518639472	7.60265737080339	2.90110854391419e-14	1.00286e-12
BRSK2	684.401018349899	-0.972462	0.145787215424005	-6.67041897087292	2.55074176746622e-11	4.36844e-10
BSN	1157.8304608449	-1.24598	0.188146897419458	-6.62239243717192	3.53431230622765e-11	5.80867e-10
BST1	43.5207609556029	0.914218	0.182182820655225	5.01813392383539	5.21758011663149e-07	3.388e-06
BST2	1153.80182423402	1.06585	0.186713749662922	5.70848206628823	1.13988185841083e-08	1.09075e-07
BTAF1	793.607439632794	-0.615781	0.10108765180225	-6.09155568976331	1.11818672648146e-09	1.34297e-08
BTBD17	487.674167818923	-0.864856	0.201605416937561	-4.28984696940852	1.78796275892709e-05	8.04304e-05
BTK	240.272738504151	0.781421	0.148239174164792	5.27135292320764	1.35421783218013e-07	1.00685e-06
BTLA	4.03217789943804	1.52651	0.259656282904953	5.87897859696733	4.12805737455282e-09	4.35002e-08
BTN2A2	291.586505611035	0.846603	0.126892218203543	6.67183141960971	2.52630674397455e-11	4.33055e-10
BTN3A1	693.157441666661	0.641418	0.127031595564585	5.04928154564896	4.43474740781906e-07	2.94122e-06
BTN3A2	1137.46376954698	0.872047	0.160505818501919	5.43311890695202	5.53774788657177e-08	4.51699e-07
BTN3A3	589.36343302103	0.939442	0.1498958761392	6.2673002119791	3.67361492454812e-10	4.89537e-09
BZRAP1	1563.670142854	-1.1011	0.145232350133269	-7.58166607433489	3.41145392353431e-14	1.15582e-12
C10orf10	1097.46326791048	1.44675	0.212285014736371	6.81511594554415	9.41877702886244e-12	1.75942e-10
C10orf105	275.659611757689	1.83017	0.336613336233882	5.437020751547	5.41788303328118e-08	4.43079e-07
C10orf11	36.6399172894738	0.831606	0.190441092635101	4.36673463511318	1.26117796641369e-05	5.88822e-05
C10orf114	55.205382134481	1.06382	0.199115428298222	5.34274397858167	9.15500252600686e-08	7.12326e-07
C10orf4	552.69621553947	-0.639285	0.0950342692394771	-6.72688776550522	1.7333032916693e-11	3.0637e-10
C10orf41	40.5919837777904	0.629761	0.120104895237374	5.24342757429735	1.57620696969185e-07	1.15179e-06
C10orf79	80.4341020665303	2.21967	0.267648574921199	8.29321720778043	1.10225795581845e-16	6.88397e-15
C10orf93	16.672716200634	0.802944	0.168415594145076	4.76763529829369	1.86400813778022e-06	1.05798e-05
C11orf2	3006.81432727628	-0.594917	0.0896497153879992	-6.63601971210169	3.22266763913061e-11	5.35758e-10
C11orf20	20.8835261430789	-1.19687	0.246020102031947	-4.86493716744596	1.14493173806974e-06	6.87326e-06
C11orf21	6.83561767889319	1.81767	0.261088987226071	6.96187903950331	3.35763749724395e-12	6.98986e-11
C11orf35	6.23978092868116	1.26577	0.235700405181464	5.37024780985755	7.86285195545374e-08	6.19766e-07
C11orf41	1058.21492150714	-0.731558	0.152410378920671	-4.79992008464123	1.58728956267592e-06	9.17318e-06
C11orf45	44.9546376002903	0.900529	0.152254528369589	5.91462701796509	3.32628466322849e-09	3.59422e-08
C11orf63	48.5709588108899	2.84238	0.309617381531411	9.18030414983659	4.2987551713105e-20	6.54809e-18
C11orf70	55.3500637218125	1.62905	0.275980425837525	5.90277186010778	3.57444413570646e-09	3.83347e-08
C11orf86	1.37467830796367	2.81382	0.58105503330502	4.84260044488843	1.28150816841124e-06	7.60205e-06
C11orf88	5.24659217936623	5.05478	0.686810489008377	7.35978980630421	1.8420004091416e-13	5.06037e-12
C12orf34	1117.00110971232	-0.704993	0.158798721471742	-4.43953988710944	9.01514059416442e-06	4.35441e-05
C12orf48	40.193991826209	0.843066	0.162091947249443	5.20115765719495	1.98051006945186e-07	1.42009e-06
C12orf5	423.433898515361	0.708386	0.0992970761337387	7.13401113875122	9.7485436802851e-13	2.28026e-11
C12orf51	2131.19098164964	-0.734181	0.0806492174834892	-9.10338937268445	8.75558569612618e-20	1.20621e-17
C12orf53	1793.58059437132	-0.86145	0.135035889730923	-6.37941161076065	1.77769650364033e-10	2.52134e-09
C12orf63	18.9003686371887	2.68667	0.353356755351332	7.6032665863721	2.88747814787801e-14	1.00132e-12
C13orf15	2736.40745496915	-0.719523	0.165200305213731	-4.3554587008446	1.32788552319747e-05	6.1491e-05
C13orf18	218.864771344628	1.07949	0.207055192030025	5.21353265246018	1.85277899386813e-07	1.33565e-06
C13orf26	23.2191922853249	2.65617	0.408344752952317	6.50471758422766	7.78394756273864e-11	1.18859e-09
C13orf29	30.4337198225033	1.52795	0.211848012560151	7.21246333420253	5.4948629455333e-13	1.35588e-11
C13orf30	6.90571806567584	4.87639	0.811934799688779	6.00588378174564	1.90292467546251e-09	2.18062e-08
C13orf31	155.205172415999	0.962494	0.192915011718864	4.98921317264299	6.06257172463946e-07	3.89134e-06
C13orf33	13.1145872120751	2.4597	0.364055270252123	6.75638034575778	1.4148171773201e-11	2.54396e-10
C13orf38	15.3752651369673	0.81909	0.179023894615094	4.57531238870499	4.75509922385943e-06	2.45634e-05
C14orf106	228.549531834814	0.671126	0.131832998036995	5.09073211542519	3.56683644394354e-07	2.42044e-06
C14orf169	99.6510380048885	0.751191	0.128455829676797	5.84785065916478	4.97965306570602e-09	5.15748e-08
C14orf174	31.027301812837	1.13647	0.180437855940011	6.29841481979226	3.00704893882445e-10	4.05324e-09
C14orf45	117.733878188961	0.676987	0.114450661715101	5.91510199263221	3.31669994540199e-09	3.58786e-08
C14orf50	13.5923002456461	2.25757	0.296472383087478	7.61476378409623	2.64174146041326e-14	9.26885e-13
C14orf86	19.797854778739	1.43482	0.285790349079882	5.02052963594677	5.15291998261455e-07	3.34993e-06
C15orf26	10.4383903155155	5.15255	0.554321181353964	9.29524283901258	1.46870545909771e-20	2.54793e-18
C15orf28	4.97364501772762	-0.805451	0.188952636937064	-4.26271545140456	2.01957621085373e-05	8.94322e-05
C15orf56	3.66262154569523	1.69655	0.247227065250403	6.86231129622253	6.77552113651207e-12	1.30603e-10
C16orf54	26.4300319982151	1.29461	0.169546297824833	7.63573232674091	2.24540401471021e-14	8.05937e-13
C16orf55	198.092130506746	0.621439	0.0967965561128687	6.42005147493528	1.36228273218028e-10	1.97247e-09
C16orf71	35.9333661916952	1.40161	0.183775894561433	7.62675387673148	2.40738578696819e-14	8.57505e-13
C16orf75	76.0791363479902	0.863691	0.201983193637986	4.27605439871413	1.90234758051592e-05	8.48224e-05
C16orf89	250.15058779848	1.28269	0.235545637300168	5.44561506902872	5.16266751457185e-08	4.25177e-07
C16orf93	88.8921031377731	0.633014	0.138701368617136	4.56386448428764	5.02205024995801e-06	2.57931e-05
C17orf60	37.0907017326168	1.04557	0.18023439480557	5.80115596457565	6.58593064336725e-09	6.63765e-08
C17orf69	142.649992661382	-0.672891	0.0987600276668076	-6.8133939160545	9.53226578613394e-12	1.77708e-10
C17orf72	103.753671385863	3.23525	0.288921077118125	11.1976914452178	4.1849707639415e-29	6.03151e-26
C17orf87	27.3638074029553	0.995323	0.208415455570751	4.77566588612138	1.79113568133386e-06	1.02282e-05
C17orf96	310.903724169642	-0.952955	0.153256930670873	-6.21802142910087	5.03462816298014e-10	6.53529e-09
C19orf35	34.0591673411535	0.984746	0.196766900829352	5.00463028369312	5.59693475857218e-07	3.61975e-06
C19orf40	21.5822735453216	0.710997	0.132389060634497	5.37051155311528	7.85136029777663e-08	6.19243e-07
C19orf51	47.9904414369849	2.32112	0.260294321437766	8.91729509748797	4.77815222088433e-19	5.42566e-17
C19orf66	536.082996041187	1.00377	0.149094503101986	6.73243410015803	1.66847963641005e-11	2.95469e-10
C1GALT1	293.107127253466	0.588648	0.0903089153648631	6.51816455140154	7.11728917166639e-11	1.10115e-09
C1orf110	6.2527446203952	3.1997	0.418169968428383	7.65166761013087	1.9838950417993e-14	7.28829e-13
C1orf113	43.4417755033538	0.688805	0.153316367895853	4.49270202404477	7.03251518204998e-06	3.47472e-05
C1orf127	2.28519232624459	1.44089	0.329796346977212	4.36902214181098	1.24804113699126e-05	5.8327e-05
C1orf133	18.9927259663647	1.1953	0.257082540269933	4.64948575082977	3.32763670571441e-06	1.78626e-05
C1orf158	32.1289946817488	5.69053	0.627116728479957	9.07411185934581	1.14608344371545e-19	1.54482e-17
C1orf192	239.49748436285	2.28305	0.274563726129247	8.31518988830686	9.16054773964273e-17	5.87781e-15
C1orf194	129.218494627631	1.77653	0.271982541819052	6.53178133904054	6.49919965638061e-11	1.0139e-09
C1orf201	116.262523385352	1.08319	0.222228825295897	4.87421136675977	1.09243977323073e-06	6.60896e-06
C1orf220	11.674715735286	-0.976145	0.175376760443628	-5.56598873815324	2.60670079210207e-08	2.28862e-07
C1orf54	201.030278259313	0.805847	0.145055027897817	5.55545534954993	2.76888989710935e-08	2.4163e-07
C1orf61	18698.6095606027	-0.843947	0.139885267527638	-6.03313991024879	1.6080407462485e-09	1.88184e-08
C1orf84	5.78532705385042	0.754346	0.146882694395507	5.13570118808508	2.81093984627579e-07	1.94626e-06
C1orf85	481.838785869017	0.785718	0.117230476706505	6.70233731974733	2.05111870688355e-11	3.58152e-10
C1orf87	16.5372092843498	2.90269	0.454607998386371	6.38504264899969	1.71349707315644e-10	2.43767e-09
C1orf88	476.712941995898	2.20937	0.213389550872934	10.3537056149852	4.02595130640798e-25	1.88576e-22
C1orf95	426.545175660356	-0.954568	0.21417833282512	-4.45688311268009	8.31599162396368e-06	4.05963e-05
C1orf97	54.1016203062153	0.661727	0.112362729328535	5.88920665335492	3.88053955053913e-09	4.11931e-08
C1QA	3796.94406218242	1.0497	0.187894620690361	5.58662807082061	2.31520825977705e-08	2.05287e-07
C1QB	5778.07369037008	1.07188	0.185704168357993	5.77197065168325	7.83497647940343e-09	7.76699e-08
C1QC	5055.05395035247	0.925939	0.174636638634621	5.30208763962037	1.14485853349667e-07	8.6737e-07
C1QTNF1	1109.43991045872	1.28299	0.235129572207302	5.45650738253209	4.85591096148703e-08	4.0239e-07
C1QTNF2	26.9830395939086	1.12866	0.182459335231003	6.18580648581728	6.1785765105957e-10	7.87214e-09
C1R	2898.42878515915	2.275	0.224484737162011	10.1343098537604	3.89111499062599e-24	1.35007e-21
C1RL	372.965379757834	2.16644	0.192388422365115	11.2607388308239	2.05032471293399e-29	3.20124e-26
C1S	2347.95916431164	2.32311	0.224821314641325	10.3331213535975	4.99095497494354e-25	2.17466e-22
C2	464.113724909441	1.29862	0.212979549719224	6.09737592205228	1.07823751473749e-09	1.29832e-08
C20orf134	6.13153686105619	1.11266	0.218752193057561	5.08640192213128	3.64920294191454e-07	2.46828e-06
C20orf195	2.52670061185774	2.53599	0.403943242076577	6.27808409099671	3.42770524802843e-10	4.5971e-09
C20orf197	9.35426143974475	0.861246	0.184156284702655	4.67671199757242	2.9151121538407e-06	1.58404e-05
C20orf203	25.9441296055882	-1.76057	0.226060069521962	-7.78804290545849	6.80550740554461e-15	2.84616e-13
C20orf26	57.8700031777366	2.58307	0.252243952563699	10.2403836970878	1.30716928189059e-24	4.70983e-22
C20orf30	1872.54052547716	0.717356	0.0461075546817234	15.5583155009901	1.39728132120889e-54	2.61795e-50
C21orf121	5.61720713919577	1.9919	0.372285037064134	5.3504593925506	8.77312377115031e-08	6.84603e-07
C21orf125	9.40069106135387	-2.18228	0.229757645437618	-9.49817927636198	2.13592048546112e-21	4.44651e-19
C21orf62	518.048688524059	2.25394	0.24596993789484	9.16349304056431	5.02440469155551e-20	7.41238e-18
C21orf63	289.978053055528	1.37103	0.176169391433722	7.7824762139839	7.11185784970829e-15	2.93497e-13
C21orf7	123.532824608758	1.97398	0.250809632031518	7.87042097016584	3.5344988575629e-15	1.55817e-13
C21orf88	42.813179038991	1.09733	0.183108999730227	5.99275224866461	2.06319052579425e-09	2.34705e-08
C22orf15	1.79734171275678	2.1243	0.460481340944528	4.61321611007705	3.96485677829653e-06	2.08433e-05
C22orf36	279.286081506296	-0.600283	0.111708698109634	-5.37364386280657	7.71611880941826e-08	6.09997e-07
C22orf45	6.08099576882044	-0.91912	0.187888251544034	-4.89184612281207	9.98945324986433e-07	6.11442e-06
C2orf27A	139.862878100574	-1.16984	0.195305481500963	-5.98978083679564	2.10123999542166e-09	2.38454e-08
C2orf39	72.4465865429752	5.59966	0.546144790983952	10.2530594974977	1.14655753260814e-24	4.21214e-22
C2orf40	104.938475885578	1.51399	0.287702535063543	5.26233152477256	1.42239984750696e-07	1.05129e-06
C2orf50	17.6563176304452	2.84271	0.392923416966883	7.23476842889346	4.66324138276993e-13	1.1665e-11
C2orf62	17.6062974388046	4.35958	0.459612028002642	9.48535572476781	2.41557760501035e-21	4.97344e-19
C2orf66	5.06781330334934	1.50259	0.303426928269068	4.95205412833242	7.343417026313e-07	4.64035e-06
C2orf70	3.50754497529248	3.53834	0.630523588932997	5.61175139799901	2.00289041965711e-08	1.80588e-07
C2orf73	6.48520434017122	1.51933	0.243221850315088	6.24668715120261	4.19249604901901e-10	5.52395e-09
C2orf77	227.242257465356	1.35373	0.164142355506244	8.24731744010328	1.61989696470958e-16	9.66573e-15
C2orf80	181.012289640736	-0.953673	0.198526890740327	-4.80374615723968	1.55724232163387e-06	9.01901e-06
C2orf81	176.636382807418	0.645113	0.146870611331474	4.3923893888392	1.12111672035725e-05	5.30019e-05
C2orf85	356.397072240893	-1.67868	0.255434235731512	-6.57186281058326	4.96896361283945e-11	7.97076e-10
C3	17069.5929446409	1.37992	0.178818624258489	7.71686779101759	1.19223204365955e-14	4.65368e-13
C3orf15	153.106601622798	1.26084	0.217086359400421	5.80801780488424	6.3216795283536e-09	6.39886e-08
C3orf16	9.45779358582349	2.29215	0.473663554735946	4.83919153904754	1.30368358772505e-06	7.71992e-06
C3orf52	5.8790568753185	2.28823	0.333794640702988	6.85519780409632	7.12139118706523e-12	1.36066e-10
C3orf59	240.7371388053	-0.957029	0.134249572193472	-7.12872831584844	1.0130045771589e-12	2.36359e-11
C3orf66	6.30335176480557	2.32611	0.431131003232736	5.39535914680423	6.83866225825425e-08	5.48263e-07
C4orf12	172.700072855647	-0.689184	0.149029244572322	-4.6244892177849	3.75522617555407e-06	1.98751e-05
C4orf47	27.0161045743396	1.96854	0.247040236231088	7.96850826326667	1.60601130978132e-15	7.54141e-14
C5orf32	749.285670625422	0.618514	0.125620947943044	4.92364944939409	8.49449476176772e-07	5.27947e-06
C5orf39	70.9662628304868	0.838246	0.151169773994018	5.54506636559897	2.93842697326259e-08	2.54881e-07
C5orf49	112.62394767727	3.00637	0.350222227041873	8.58417768222109	9.14884753374363e-18	7.61835e-16
C5orf62	466.559275264654	1.09013	0.165224138469261	6.59791559825658	4.16978520373209e-11	6.76408e-10
C6	8.0906636758752	3.06852	0.492925286873509	6.22512464901045	4.81173300894442e-10	6.28679e-09
C6orf115	112.322318862713	0.950328	0.12530688466982	7.58400233674221	3.35055120003019e-14	1.14138e-12
C6orf118	28.4101386467344	2.91376	0.283938684126758	10.2619376315217	1.04586756929437e-24	3.91907e-22
C6orf141	16.6524104398082	3.41356	0.435941916841185	7.83030842069683	4.86674601500527e-15	2.07707e-13
C6orf15	26.4423367026711	10.8623	1.03407027438018	10.5044561683019	8.23963380003156e-26	4.67811e-23
C6orf150	24.8138815427768	1.49524	0.161016390001503	9.2862887763965	1.59761851776194e-20	2.72118e-18
C6orf165	39.6356256111624	2.86757	0.263966475211277	10.8634014916419	1.72212589265335e-27	1.79254e-24
C6orf168	426.340874838848	-0.675735	0.124977897807022	-5.40683514958457	6.41481340428103e-08	5.17382e-07
C6orf195	2.0074269716259	1.32885	0.311377903385857	4.26763868234541	1.97552958378303e-05	8.7606e-05
C6orf221	3.07247572598431	-1.55363	0.356588943870233	-4.35693413066795	1.31896939771267e-05	6.11386e-05
C6orf97	86.890789266031	1.45634	0.260434049623818	5.59195389426053	2.24528449158278e-08	1.99846e-07
C7	151.632211437291	1.71427	0.285851236437193	5.99707440468774	2.00904024603478e-09	2.29095e-08
C7orf29	30.7682862553717	1.61989	0.215578215883971	7.5141721254213	5.72721917671587e-14	1.80648e-12
C7orf31	97.3784581407377	0.854848	0.112021377415765	7.63111108347784	2.32739023745556e-14	8.3059e-13
C7orf54	7.34723219988262	-1.11883	0.166127984624858	-6.7347684452279	1.64191201973521e-11	2.91315e-10
C7orf57	67.0583065349831	4.83857	0.407189217531711	11.8828618051851	1.4530594342888e-32	3.40307e-29
C7orf68	280.741596088635	0.708637	0.133617937599809	5.30345361928225	1.13632084669608e-07	8.61948e-07
C8orf12	21.9890629365697	1.52396	0.325441540864198	4.68275334424756	2.8304702890894e-06	1.54269e-05
C8orf34	91.6843238065901	2.09607	0.316408827791514	6.62455154775521	3.4830395906891e-11	5.72943e-10
C8orf42	506.008892520665	-0.619779	0.10846530553466	-5.71407353985651	1.10303293625525e-08	1.05873e-07
C8orf48	24.0681540802247	1.11904	0.156066979605791	7.17027709783207	7.48461171054466e-13	1.79554e-11
C8orf84	98.7312687413088	1.91838	0.274815114128825	6.98063112296156	2.93856949177516e-12	6.22113e-11
C9orf110	125.603043985765	1.377	0.282243182283332	4.87876971622044	1.06749611714743e-06	6.48318e-06
C9orf116	118.952547499539	1.01517	0.152889288673389	6.63991696091184	3.13859922046454e-11	5.24107e-10
C9orf117	12.6497955600036	2.41293	0.277708332177075	8.6887147217863	3.66562855231782e-18	3.41688e-16
C9orf140	1068.96889199234	-1.20973	0.204105542371354	-5.92697524277164	3.0856547461487e-09	3.35926e-08
C9orf167	148.084287965079	0.610146	0.1215436562706	5.01997012365874	5.16795166897687e-07	3.35854e-06
C9orf170	11.3073248307997	1.1027	0.183190256791501	6.01944586052247	1.75015180499313e-09	2.02538e-08
C9orf171	45.5404256141551	3.36993	0.352278722825773	9.56610055315836	1.11013974306041e-21	2.53653e-19
C9orf24	90.4900497633937	2.77124	0.396168898083683	6.99509746532159	2.65074588039654e-12	5.71512e-11
C9orf3	235.96021545526	0.890883	0.115106232863308	7.73965608241325	9.96860933185928e-15	3.97387e-13
C9orf44	14.4648662681151	4.30673	0.672754879897013	6.40162914604756	1.53727700567704e-10	2.20202e-09
C9orf47	21.7680419141059	1.94359	0.238715047832971	8.14189288262996	3.89145466602063e-16	2.10116e-14
C9orf64	194.379671544537	1.53574	0.191914798749558	8.00220038240399	1.2221528245013e-15	5.99431e-14
C9orf68	30.5423725582816	0.838033	0.192053869518827	4.36352892577355	1.27981009625724e-05	5.96036e-05
C9orf95	178.230850324442	0.632364	0.106053290914641	5.96269964547025	2.4810422683842e-09	2.7686e-08
CA10	580.655828450819	-1.1755	0.251621885824878	-4.67169329514311	2.98726792824001e-06	1.61715e-05
CA13	79.4974542189148	0.732613	0.152317931915086	4.8097602127519	1.51111461679343e-06	8.78663e-06
CA2	1465.39970663597	1.31486	0.182761722600173	7.19440657349225	6.27330044046538e-13	1.52752e-11
CA3	197.862109225364	4.21542	0.323046221274335	13.0489727827719	6.44099809943729e-39	3.44928e-35
CA5B	262.288043343287	0.736495	0.158306620323395	4.65233338006107	3.28199905349191e-06	1.76446e-05
CA9	9.95153258373467	1.88518	0.358579189150581	5.25735296096896	1.46143658087749e-07	1.07716e-06
CABP1	220.143379428388	-1.28955	0.28071917941808	-4.59374979230224	4.35351332100474e-06	2.26828e-05
CABP4	11.0932384940794	1.48945	0.200364136070164	7.43372251973203	1.0558333911846e-13	3.09095e-12
CACNA1A	647.002607743957	-0.832139	0.155905848657171	-5.33744446030963	9.42657644917463e-08	7.31028e-07
CACNA1B	220.652167100728	-1.52526	0.266199523434323	-5.72974781067919	1.00580053877364e-08	9.73382e-08
CACNA1H	306.490634359786	-1.04797	0.193881818075028	-5.40520905522913	6.4732847053439e-08	5.21649e-07
CACNA2D2	176.091149118322	-1.13808	0.185766414790167	-6.12642433868502	8.98759146998972e-10	1.10276e-08
CACNA2D3	89.095161489779	-1.46562	0.250007134543975	-5.86231587198319	4.56455646795114e-09	4.75384e-08
CACNG2	47.5629038673135	-2.31488	0.335117646354547	-6.90765866810776	4.92717738141439e-12	9.8839e-11
CADM2	1319.99194504702	-1.01633	0.144027094183149	-7.05649553133819	1.70754129524181e-12	3.79058e-11
CALD1	2673.20838066481	0.927717	0.11774225437592	7.87921631126813	3.29440749164041e-15	1.4592e-13
CALU	2349.57384485867	0.930311	0.112331576310004	8.28183250874923	1.21294112101394e-16	7.42669e-15
CAMK1D	240.92137089824	-0.643225	0.133995694320402	-4.80033803812162	1.583980335372e-06	9.15688e-06
CAPG	1376.26081869969	1.58099	0.193514147487919	8.1698874839066	3.08677205901381e-16	1.696e-14
CAPN9	8.36279485452046	1.4508	0.293762474419614	4.93867963838092	7.86533031997964e-07	4.93519e-06
CAPS	798.690308684859	2.22443	0.250811952730487	8.86890039032312	7.38717186343801e-19	8.09392e-17
CAPSL	21.7034419903044	5.103	0.620237131222534	8.22749080298082	1.91175803425072e-16	1.11933e-14
CARD14	28.4685348902426	-0.695714	0.16058906749401	-4.33226538435225	1.4758289598426e-05	6.75902e-05
CARD16	81.0893185012184	2.09488	0.210357214674433	9.95868747007513	2.31093375694661e-23	6.66118e-21
CARD6	137.149244909493	0.787968	0.138280438289142	5.69833139883469	1.2098569979398e-08	1.14774e-07
CARD9	127.651324294075	0.719899	0.161655989423677	4.45328014179081	8.45682986419107e-06	4.11872e-05
CASC1	54.8570646199493	1.60815	0.214749145760315	7.48850506476425	6.96624995449786e-14	2.1467e-12
CASKIN1	748.851093962985	-1.29867	0.158539318005575	-8.19144335398176	2.58111892837274e-16	1.4479e-14
CASP1	254.780232931917	1.31939	0.148075905411179	8.91024452812726	5.09201320021759e-19	5.74723e-17
CASP4	158.364251154658	1.42249	0.157254109359369	9.04580659443363	1.48564248803679e-19	1.93299e-17
CASP5	3.42651281412715	1.82345	0.386194539471274	4.72158316514173	2.34015905781967e-06	1.29912e-05
CASP6	98.3583518675345	0.945639	0.113280263212515	8.3477858544887	6.9554537231445e-17	4.61762e-15
CASP7	219.40604634173	0.685488	0.112297696883227	6.10420425648969	1.03314096340638e-09	1.25045e-08
CASP8	135.952552677273	1.38905	0.136985565705549	10.1401358091154	3.66589572966741e-24	1.29593e-21
CASP9	816.777028205918	-0.749061	0.126926211973392	-5.90154780956777	3.60107036284644e-09	3.85321e-08
CAST	1548.07435597694	0.821975	0.0919925530942293	8.93523423407213	4.06316516040211e-19	4.78789e-17
CASZ1	154.415250406077	-0.803943	0.175027029470064	-4.59324783317359	4.36400274137467e-06	2.27185e-05
CAV1	1191.23204924099	1.05365	0.247822698841919	4.25163580608915	2.12214761672584e-05	9.34443e-05
CAV2	345.006738985332	1.16983	0.225798892830381	5.18084829843835	2.20879077056026e-07	1.56757e-06
CBFA2T3	107.547276592432	-0.742337	0.150785534399848	-4.92313094867909	8.51704183258608e-07	5.2892e-06
CBLN1	102.047827132156	-1.2311	0.283950102508442	-4.33561559505944	1.45352764616256e-05	6.67156e-05
CBLN2	100.880775501539	-1.54983	0.280522226385969	-5.52481206094057	3.29838491470985e-08	2.8322e-07
CBLN3	26.9766200045044	1.2175	0.220260000490919	5.52757386943378	3.2468952989679e-08	2.79311e-07
CBR1	1762.04169002396	1.42185	0.215853400576664	6.58712713568524	4.48418294545884e-11	7.21164e-10
CBS	3008.60356825326	-0.794535	0.120525220385064	-6.59227414221426	4.3313982773487e-11	7.00804e-10
CBX6	967.005239763174	-0.584135	0.121339350578555	-4.81405739766572	1.47896298473209e-06	8.62161e-06
CCBL1	513.55228487808	-0.847553	0.109815952667933	-7.71794288662703	1.18222149118359e-14	4.62424e-13
CCDC102A	139.261730219285	0.773215	0.110522868093077	6.9959715725896	2.63426950587125e-12	5.68614e-11
CCDC103	924.564076382597	1.15509	0.168366336172943	6.86060044389355	6.85717088500064e-12	1.31688e-10
CCDC108	26.17875269419	2.22896	0.322906672781143	6.90281472964948	5.09821039318144e-12	1.01324e-10
CCDC109B	158.675544987274	1.92335	0.206338509898828	9.32131641440091	1.14905669260891e-20	2.11066e-18
CCDC11	64.5516839004351	1.26834	0.201207715753378	6.30361882312597	2.90775098565045e-10	3.93924e-09
CCDC114	16.0389806897792	1.3628	0.25838445946625	5.27432213774693	1.33247674724072e-07	9.93841e-07
CCDC122	19.649373187277	1.2361	0.227716261895548	5.42824054174894	5.69123040502605e-08	4.62808e-07
CCDC125	149.059528996334	0.720533	0.122737598434742	5.87051965679345	4.3443126705472e-09	4.54769e-08
CCDC135	51.9426915733722	2.43943	0.289911611944091	8.41437916759294	3.94981180082663e-17	2.8463e-15
CCDC138	44.1787944170127	0.649378	0.135471247237689	4.79347620805116	1.63915906756e-06	9.45836e-06
CCDC144C	38.3022782727415	-1.16005	0.205764270712402	-5.63777984324063	1.72256534362155e-08	1.58051e-07
CCDC146	289.413845498939	0.826572	0.172907571533503	4.7804266160476	1.74923601624344e-06	1.00042e-05
CCDC147	13.3825169129579	1.04957	0.242058086297313	4.33601892057008	1.45086460899961e-05	6.6626e-05
CCDC148	16.5006445854514	0.699099	0.160700276917475	4.3503309905548	1.3593219160049e-05	6.27761e-05
CCDC151	106.328794105532	0.781911	0.140973475921122	5.546512164552	2.91424361372873e-08	2.53253e-07
CCDC152	109.083441555714	1.48406	0.194387326208651	7.63453562917496	2.26635810089637e-14	8.11902e-13
CCDC153	10.4415301971116	2.15051	0.278964262245428	7.70890012662748	1.26906676000689e-14	4.88239e-13
CCDC18	51.1166549165353	0.798032	0.169225668071939	4.71578778340189	2.4077729867809e-06	1.33428e-05
CCDC19	16.6261426541148	3.65679	0.447467593001773	8.17218435702521	3.0285526219442e-16	1.66891e-14
CCDC30	106.597913364078	0.76086	0.121841068017671	6.24469649813612	4.24623808174326e-10	5.5869e-09
CCDC33	5.21774038549072	5.35743	0.753600919284494	7.10910927147542	1.16794252697565e-12	2.66925e-11
CCDC37	27.2213708745206	5.46163	0.615534892604463	8.87298886564666	7.12084553681994e-19	7.84801e-17
CCDC39	46.4559864650365	1.08391	0.214572464581956	5.05147991321917	4.38400045625738e-07	2.91065e-06
CCDC40	267.078536154867	1.38906	0.182569446854414	7.60838894508546	2.77533578988528e-14	9.70125e-13
CCDC42B	46.474906416753	4.35754	0.412894982489125	10.5536189710778	4.88774136526727e-26	2.89766e-23
CCDC46	134.347950200673	1.45078	0.169184811140975	8.57509225642425	9.90074014273921e-18	8.17182e-16
CCDC48	25.1995619938931	0.942641	0.203039312044256	4.64265301588038	3.4396372709196e-06	1.84024e-05
CCDC62	14.1677248846474	-0.594325	0.12965974765616	-4.58372597812149	4.56762744470378e-06	2.36864e-05
CCDC65	39.4256501120196	2.81989	0.272558036628132	10.3460343273368	4.36180527191916e-25	1.99324e-22
CCDC69	225.482108289376	0.856766	0.14155659417173	6.05246371854337	1.42647133163779e-09	1.68408e-08
CCDC74A	130.777674902511	0.828282	0.154938065571227	5.34589311511713	8.99722930143085e-08	7.00923e-07
CCDC74B	145.106114195289	0.775129	0.177906051300455	4.3569584778363	1.318822746199e-05	6.11386e-05
CCDC8	131.234917405123	2.25002	0.27509350472506	8.17909540967071	2.85982606907039e-16	1.58526e-14
CCDC81	35.3770130637831	1.80144	0.216718888840991	8.31233973236027	9.3833332194921e-17	5.9798e-15
CCDC89	44.0741544989751	1.50031	0.215198486216039	6.97176146682834	3.12996933589119e-12	6.56698e-11
CCDC96	100.463470869079	1.02665	0.14350726973953	7.1539727612892	8.43018012721273e-13	1.99681e-11
CCL19	29.8237031835764	2.13787	0.375361068827458	5.69550108832277	1.23010100848361e-08	1.16635e-07
CCL26	1.30047964065332	2.13342	0.464169496091869	4.59619928290246	4.30267203110138e-06	2.24304e-05
CCL28	6.04870432226841	2.06496	0.397136573013345	5.19962119423553	1.99695084833338e-07	1.42969e-06
CCL5	94.1287993672263	2.64146	0.262739994038701	10.0535207968416	8.86426042940361e-24	2.96573e-21
CCNB1	276.19886717752	0.832987	0.180292983609503	4.62018618044129	3.833958448565e-06	2.0229e-05
CCR1	338.740617445266	0.891085	0.181213417992688	4.91732545599766	8.77346231138998e-07	5.43583e-06
CCR2	13.2900417432325	2.97677	0.34444938533346	8.64212583464715	5.51766097312178e-18	4.94636e-16
CCR4	1.27520447533405	3.38398	0.609414527713084	5.55284271596617	2.8106094907539e-08	2.44814e-07
CCR5	89.3498766414154	1.71558	0.214806101952562	7.98665933962926	1.38644527957248e-15	6.72457e-14
CCR6	13.3571119155682	0.82429	0.172004967432632	4.79224606674691	1.64924448632164e-06	9.51069e-06
CCR7	6.47680274717762	2.32597	0.30433689686441	7.64273322966822	2.12658309388201e-14	7.72164e-13
CCRL2	57.4475572775774	0.796772	0.145873077254021	5.46209119534176	4.70558225245577e-08	3.91317e-07
CD101	55.6964786584837	1.22941	0.226952809135247	5.41701380197106	6.06026642300963e-08	4.91112e-07
CD109	315.941474356528	1.76268	0.195854861048078	8.99992169873818	2.25878721775872e-19	2.84031e-17
CD14	2088.78899624225	0.971409	0.198481649839793	4.89420011499717	9.87063622980525e-07	6.0496e-06
CD151	2166.87441034391	0.877026	0.142371134017065	6.16013653449871	7.26822515216773e-10	9.11496e-09
CD163	1274.69609142072	2.11134	0.343290339906874	6.15031428183888	7.73295600663989e-10	9.62689e-09
CD164	2521.77450107835	0.734625	0.0831988754970174	8.82974879905123	1.04911072410614e-18	1.09811e-16
CD180	116.525731725374	1.00651	0.206949499432135	4.86353067667403	1.15310144500013e-06	6.91787e-06
CD19	2.85038341274846	2.49546	0.384475293105096	6.49056633452439	8.55143031220468e-11	1.29838e-09
CD2	29.0025427734903	3.06263	0.323907774154226	9.45526534009718	3.22203729964785e-21	6.49119e-19
CD200R1	3.58666214148247	1.86989	0.274522956172364	6.81143353500304	9.66309405245288e-12	1.79658e-10
CD226	18.3481961837259	1.00459	0.209243167271138	4.80105155110504	1.57834627845373e-06	9.13256e-06
CD247	17.6270829462427	1.75366	0.211806184760026	8.27954522649377	1.23646568445496e-16	7.54607e-15
CD248	171.360715167572	1.4034	0.222377603206061	6.31087422315407	2.77463626620518e-10	3.76707e-09
CD27	16.4736062096364	1.51681	0.204604235853971	7.41338314726908	1.23117525023598e-13	3.53793e-12
CD274	24.3373154005625	1.55218	0.258119890038473	6.01338970008426	1.81683565716038e-09	2.09221e-08
CD276	1460.63332609722	0.667506	0.120057211157221	5.559902605858	2.69925237326583e-08	2.36103e-07
CD28	7.1093500411099	2.27802	0.318746266595975	7.14682395556374	8.88086509026205e-13	2.09826e-11
CD300A	309.457462125119	0.751139	0.160550968274051	4.67850637353066	2.889721898153e-06	1.57206e-05
CD300C	48.8666643167815	0.883925	0.170751125484592	5.17668456704846	2.25863604557284e-07	1.60052e-06
CD300LF	44.3832065563191	1.5496	0.20112532505377	7.70464238458324	1.31210209176063e-14	5.02731e-13
CD302	787.508152575681	0.800432	0.133986043193031	5.97399481850011	2.31513157594476e-09	2.59674e-08
CD33	132.167994466461	0.687972	0.152751296387832	4.50386986053511	6.67270779419758e-06	3.31794e-05
CD37	627.523779551487	0.813865	0.167599808867299	4.85600450881191	1.19777975071381e-06	7.16069e-06
CD3D	10.2218674458977	3.30564	0.435560792626691	7.58937724321545	3.21446640045324e-14	1.09902e-12
CD3E	34.8987980837224	3.04696	0.318403081566201	9.56949898665019	1.07424978486527e-21	2.48483e-19
CD3G	2.83096401236736	3.94787	0.527957074049105	7.47763356250581	7.56728454240629e-14	2.3129e-12
CD4	1464.77857276609	0.690533	0.150046243828456	4.60213479445564	4.18182406471527e-06	2.1849e-05
CD40	103.578095598535	0.886749	0.133686856430292	6.63303082806848	3.28863090354281e-11	5.4479e-10
CD40LG	2.26612574561663	3.34486	0.485140249602766	6.89462306979715	5.40078120750393e-12	1.06291e-10
CD44	7492.9747819186	1.11616	0.201611468703358	5.53620652832909	3.09093066490044e-08	2.66751e-07
CD48	54.5600045676923	2.196	0.293350158387226	7.48592425824751	7.10453615979944e-14	2.18572e-12
CD5	14.841828316856	2.16727	0.294558160302702	7.35769168812102	1.87117600940883e-13	5.12549e-12
CD52	35.5729129921875	2.18132	0.265107737508964	8.22805592988573	1.90276240540543e-16	1.11756e-14
CD53	1090.24756868302	0.880658	0.153668612583627	5.73089169329153	9.99040442219398e-09	9.6834e-08
CD55	170.53261064446	0.715288	0.162391382972675	4.4047152423827	1.05922923488406e-05	5.05109e-05
CD58	126.32155856648	1.5539	0.137742702232146	11.2811836239798	1.62544116587199e-29	2.76857e-26
CD6	24.5694614529251	2.3696	0.237643887358768	9.97121468648488	2.0372188557957e-23	6.15634e-21
CD63	9417.79046456896	0.703256	0.116404639755055	6.0414808875174	1.52706098968006e-09	1.79605e-08
CD68	2610.50387207693	0.941316	0.16655931018685	5.6515370798533	1.59019373765451e-08	1.47276e-07
CD69	59.9909205456837	1.1908	0.252869745380888	4.70916014921931	2.48739578671076e-06	1.37232e-05
CD7	26.8302817831205	1.38427	0.208883181114236	6.62702100161353	3.42528916570734e-11	5.64931e-10
CD72	39.0901414782769	1.39109	0.201746561331163	6.89523163760101	5.3777103110323e-12	1.05948e-10
CD74	28515.9969446714	1.46599	0.194056841930782	7.55442571970419	4.2071198132777e-14	1.38776e-12
CD79B	9.32131001568476	2.30104	0.273812038104481	8.4037351102168	4.3249764723847e-17	3.06942e-15
CD80	3.93177839448242	2.0737	0.381704491057522	5.43272857453695	5.54987935568167e-08	4.52372e-07
CD86	366.839571220846	0.77664	0.162150088286631	4.78963591541968	1.67084194915917e-06	9.61327e-06
CD8A	37.3455353100734	2.03312	0.260579313223205	7.80231470279159	6.07818396120724e-15	2.56488e-13
CD8B	10.0698371669226	1.39762	0.23130458023146	6.04235540452559	1.51880445773157e-09	1.78746e-08
CD93	628.953366395587	0.981662	0.208441271558011	4.70953531972675	2.4828218849501e-06	1.3702e-05
CD96	12.6871297592068	3.28479	0.329348338033914	9.97358933897668	1.98907762143218e-23	6.1094e-21
CD97	529.217308572772	1.42383	0.181620116936917	7.83959070574713	4.52017344202885e-15	1.94243e-13
CDC42BPG	5.52338629202519	2.34339	0.309259428788055	7.57741210723299	3.52515672973773e-14	1.18364e-12
CDC42EP5	14.5424175008783	1.1883	0.231841957931381	5.12548202588903	2.96777479477047e-07	2.04728e-06
CDC6	105.935047875224	1.10916	0.20774729789765	5.33899353881603	9.34639747291985e-08	7.25847e-07
CDCA2	46.9255796674064	1.19832	0.262879680570362	4.55844359475792	5.1534100717988e-06	2.6381e-05
CDCA7L	489.224911395273	0.925049	0.193295957897918	4.78566042767113	1.70425991244867e-06	9.78279e-06
CDCA8	127.729891717097	0.951871	0.21988828211979	4.32888370207671	1.49867043421762e-05	6.85357e-05
CDCP1	87.0947698327072	0.955844	0.174871370914695	5.46598287395516	4.60348785737716e-08	3.83508e-07
CDH10	633.392085956908	-0.826737	0.148021752481298	-5.58524145691042	2.33375739106613e-08	2.06434e-07
CDH13	611.871297629074	-0.984013	0.192418861531903	-5.11391233820481	3.15553841571204e-07	2.1609e-06
CDH18	94.4430936828808	-1.40385	0.289799141087753	-4.84422379397365	1.27107601674316e-06	7.55069e-06
CDH19	34.8178845712951	1.71553	0.349208894396459	4.9126221804995	8.98663466394347e-07	5.55322e-06
CDH20	1256.67048430201	-0.958653	0.14928324965952	-6.42170392557589	1.34757330848439e-10	1.95268e-09
CDH4	213.481062939138	1.19272	0.215839758253399	5.52597096087208	3.27668330170776e-08	2.81485e-07
CDH6	225.680227843972	0.935094	0.168370240128508	5.55379388452924	2.79535072013454e-08	2.43599e-07
CDH7	19.8541954330419	-1.96299	0.359975491863659	-5.45312686864041	4.94917325496699e-08	4.09213e-07
CDHR1	656.034406827789	-1.32792	0.173772059974398	-7.64175535749347	2.14280036831067e-14	7.75048e-13
CDK2	370.813659084495	0.67466	0.128072756292385	5.26778903797598	1.38076652765568e-07	1.02456e-06
CDK4	5105.31684208043	1.32327	0.236554203875921	5.59393816391402	2.21976040366255e-08	1.97856e-07
CDK5R1	1616.05991297623	-0.968198	0.161303136439241	-6.00235015867054	1.94481714704323e-09	2.22319e-08
CDKN2C	750.641256260382	1.1148	0.19770769440051	5.63861721109826	1.71421120411512e-08	1.57439e-07
CDKN3	56.2547299183958	1.03371	0.212968141444829	4.85382756018342	1.21101049184661e-06	7.22826e-06
CDR2	218.437909123402	0.601665	0.108450902705122	5.54780757240849	2.89273989762307e-08	2.51501e-07
CDSN	18.6479064812136	1.63414	0.378529624884416	4.31708351327195	1.5810435096758e-05	7.17598e-05
CEACAM1	7.50075600967553	1.93584	0.228766781351767	8.46206554187293	2.62682808744107e-17	2.00066e-15
CEACAM21	34.4453048485173	0.848617	0.194575801918087	4.36137114794964	1.29249904396306e-05	6.01347e-05
CEACAM4	4.25549685736652	1.91127	0.31673293824344	6.03432719492893	1.59626343163712e-09	1.87039e-08
CEBPA	819.305842946251	0.852892	0.156938950455847	5.43454914247803	5.49351560597215e-08	4.48677e-07
CECR1	889.206242808295	1.31892	0.151947408826767	8.68010232922438	3.95412903190326e-18	3.66755e-16
CECR2	288.025032512301	-0.965421	0.122825762755172	-7.8600869653143	3.83866855249323e-15	1.67259e-13
CECR6	396.163812914091	-0.847247	0.107374722609985	-7.89056723461307	3.00816097850986e-15	1.34513e-13
CELF3	650.868698935844	-1.06322	0.221057108277638	-4.80971039086305	1.51149129708453e-06	8.78663e-06
CELF4	466.578316135143	-1.37103	0.289743786279674	-4.73185333107348	2.22479146619154e-06	1.24355e-05
CELF5	690.768924781513	-1.30017	0.197860455052218	-6.57116784878495	4.9922144294322e-11	8.00121e-10
CELSR1	161.393186129825	1.89916	0.275198357704961	6.90107072795584	5.16120261492453e-12	1.02328e-10
CELSR3	772.239015973691	-0.84811	0.16883321777827	-5.02336006894148	5.07752226273865e-07	3.31126e-06
CENPE	113.10269595957	1.32733	0.265093151116388	5.0070236603073	5.52781342749316e-07	3.57628e-06
CENPL	107.493433515753	0.680607	0.0971769174257505	7.00379429873186	2.49121800738677e-12	5.42517e-11
CENPN	203.461547380749	0.756641	0.143995573577174	5.25461582057869	1.48333775775287e-07	1.0903e-06
CEP135	168.790360265995	0.897928	0.138610989452711	6.47804509776168	9.2918584800881e-11	1.40171e-09
CER1	2.13708700869185	4.38901	0.729053754763482	6.02015143967666	1.74253961428095e-09	2.01906e-08
CES1	32.5020131072294	2.97882	0.393211040727028	7.57563375041921	3.57378705611598e-14	1.19611e-12
CETN2	1510.39050498059	0.810711	0.111060244814504	7.29973749233134	2.88329708806763e-13	7.55545e-12
CETP	36.8330535708082	1.1774	0.249896938561745	4.71153788033655	2.45854385358624e-06	1.3592e-05
CFB	185.193856603386	1.88869	0.202546628789192	9.32472305173137	1.11273811951631e-20	2.06418e-18
CFD	65.6086228526033	1.35306	0.211146213576667	6.4081754376556	1.47271390319988e-10	2.11913e-09
CFH	391.574776123538	1.42892	0.190716892212381	7.49234513376088	6.76537350134884e-14	2.09861e-12
CFI	607.905565558329	2.12355	0.254397490766907	8.34735968340587	6.98058858424862e-17	4.61762e-15
CG030	38.2472225113801	-0.655764	0.149761504974825	-4.37871927083099	1.19378790668024e-05	5.60712e-05
CGREF1	473.199148509295	-0.839044	0.153457904005962	-5.4675872742482	4.56202603737737e-08	3.80562e-07
CHAD	45.0684420606199	2.1727	0.408651098146918	5.31675650641643	1.05633273414729e-07	8.09797e-07
CHAF1B	95.0792230935129	1.02033	0.200783852803209	5.08171130801556	3.74049600084692e-07	2.52366e-06
CHD5	627.424532784062	-1.23271	0.288650608002306	-4.27058048730975	1.94964842286352e-05	8.66017e-05
CHEK1	159.172115868359	0.652014	0.136063952330784	4.79196845915178	1.65152871081219e-06	9.51801e-06
CHEK2	81.6242103271346	0.635621	0.14122019391706	4.50092317217555	6.76589597815964e-06	3.35892e-05
CHGA	780.450322344037	-1.46699	0.299604211538246	-4.89644210441335	9.75873816421095e-07	5.98885e-06
CHGB	1284.84280258343	-1.34776	0.218823885149342	-6.15909730735093	7.31607645012698e-10	9.1627e-09
CHI3L1	14691.2907650558	4.10509	0.445960353365704	9.20506423894558	3.41466919689581e-20	5.33144e-18
CHI3L2	1536.30055863603	2.42398	0.306353460156427	7.91237171571447	2.52531038883011e-15	1.14286e-13
CHIT1	109.026652699219	2.57714	0.409013101242171	6.30086332162718	2.95992319772951e-10	4.00412e-09
CHMP4C	4.0939987391161	1.24487	0.276996060638525	4.49418252514441	6.98377080580278e-06	3.45427e-05
CHODL	85.377068628259	2.81578	0.313793642384668	8.97336295846294	2.87596499686697e-19	3.43211e-17
CHRM1	236.58993062014	-1.31532	0.301857696215473	-4.35742535087602	1.31601361384577e-05	6.1062e-05
CHRM4	30.8502959605481	-1.31411	0.230571263746779	-5.69937975903349	1.20244099217217e-08	1.14128e-07
CHRNA1	57.057933405307	3.19545	0.450628167259492	7.0910972889697	1.33052762463616e-12	3.01801e-11
CHRNA4	330.00096703466	-1.15059	0.213503032182972	-5.38911979203782	7.08036012429463e-08	5.65463e-07
CHRNA6	2.6650973693232	2.47594	0.525137456038087	4.71484350918509	2.4189658963205e-06	1.3389e-05
CHRNA9	23.5442032504363	3.61029	0.476428860676836	7.57781653577922	3.51418852371778e-14	1.18325e-12
CHRNB2	390.430287031473	-0.996028	0.204260188429191	-4.87626972772113	1.08110757534674e-06	6.55098e-06
CHST1	995.901354953057	-0.880169	0.180173122955303	-4.88512888246202	1.03361220030729e-06	6.30191e-06
CHST13	5.24036719857896	1.16656	0.273181711307888	4.27025943761541	1.95245715027319e-05	8.66854e-05
CHST2	829.890010846772	0.935098	0.167010518741581	5.599036427874	2.15546505542637e-08	1.926e-07
CHST6	556.080573492876	1.53281	0.208449977942813	7.35335640029004	1.9329064679602e-13	5.25616e-12
CIITA	286.057441450597	1.46083	0.246755848803516	5.92013242138493	3.21682499899553e-09	3.48787e-08
CISH	52.6953823648245	1.25498	0.180647903309114	6.94708886606557	3.72900825444406e-12	7.68611e-11
CITED4	86.7212171559483	1.01404	0.204594533553252	4.95634416052797	7.18319315878419e-07	4.55292e-06
CKM	1.77152623466737	1.7972	0.332602872674363	5.40343075651264	6.5378200733986e-08	5.26325e-07
CKMT1A	115.325288166431	-1.6109	0.269372511920699	-5.98017720276214	2.22895010524443e-09	2.51273e-08
CKMT1B	316.249456599747	-1.49561	0.241037004843524	-6.20488419607874	5.47371939562983e-10	7.06306e-09
CKMT2	47.8550692092292	1.22326	0.231953926180684	5.27372146776154	1.33684752997756e-07	9.96308e-07
CLASP2	4975.89543473664	-0.586261	0.0839890347677153	-6.9802131729334	2.94732506139111e-12	6.23263e-11
CLCF1	60.3555715878253	1.2982	0.303354201911943	4.27946989107778	1.87338977766805e-05	8.36507e-05
CLCNKB	1.32548830710032	2.95855	0.49961444688674	5.9216595116633	3.18708962394457e-09	3.45964e-08
CLDN1	31.0886497051578	1.24753	0.216805662938105	5.75413528015051	8.70863998931415e-09	8.52928e-08
CLDN23	15.8632050964699	1.5431	0.185259332685584	8.32938139481914	8.12658659643116e-17	5.30522e-15
CLDN9	22.6036013357209	-0.995498	0.190377116739365	-5.22908360081417	1.70352324740203e-07	1.23662e-06
CLEC12A	10.0219583717208	3.00741	0.407398066448351	7.38198424034077	1.55947656399758e-13	4.35445e-12
CLEC17A	26.4410184263713	1.90387	0.339497322656481	5.60789408182175	2.04803292834018e-08	1.84303e-07
CLEC18A	93.7697930139331	1.2762	0.205745448419474	6.20281072289807	5.54635314700086e-10	7.15186e-09
CLEC18B	106.484226622284	1.53916	0.214829512069394	7.16457039311946	7.80308652046099e-13	1.85767e-11
CLEC18C	18.4175490935409	1.47002	0.273805780622887	5.36884460777274	7.92426579802268e-08	6.24082e-07
CLEC2B	85.3586755925325	1.04632	0.178057426024623	5.87627995979952	4.19588493371068e-09	4.40909e-08
CLEC5A	67.8030925550951	2.5563	0.329894849009298	7.74883310079225	9.2740815364461e-15	3.72075e-13
CLEC7A	170.548703030168	0.958036	0.190758725093543	5.02224031104566	5.10722256394256e-07	3.32831e-06
CLECL1	10.0739052491492	1.36712	0.287818656208059	4.74995244239277	2.03464492183866e-06	1.1465e-05
CLIC1	1423.26222666674	1.39875	0.166631368109971	8.39428352680148	4.68743772721136e-17	3.31411e-15
CLIC3	3.85103105908637	1.90176	0.337747923684309	5.63070422740854	1.79475280393918e-08	1.63952e-07
CLIC6	13.7184140139112	1.68154	0.379058162908442	4.43609228077405	9.16065903803353e-06	4.419e-05
CLU	195436.126620399	1.01521	0.172494559491012	5.88546033833385	3.96947572919037e-09	4.19707e-08
CLYBL	91.8927720781282	0.609752	0.133233027755433	4.5765844636427	4.72628935703097e-06	2.44551e-05
CMAH	52.1353857764546	1.02525	0.192502225496697	5.32591827726257	1.00444286878529e-07	7.74136e-07
CMPK2	208.999556377734	1.39567	0.228256227603579	6.11450658129226	9.6856173092029e-10	1.18067e-08
CMTM3	1235.51011348566	0.661472	0.101249643810235	6.53307861521713	6.4431300602593e-11	1.00683e-09
CMTM6	1066.74914204845	0.624296	0.0845387458887623	7.38473309098005	1.52759518889591e-13	4.2734e-12
CMTM7	161.086576769512	0.78768	0.146410386277518	5.37994511342951	7.4508551674736e-08	5.92526e-07
CMYA5	290.903423176354	2.10848	0.334836683290866	6.29704339631918	3.03376368968937e-10	4.08631e-09
CNGA3	385.932703304578	2.51241	0.309900160012279	8.10716881763219	5.1812850525298e-16	2.73455e-14
CNIH3	276.942880366572	0.954409	0.207847593116603	4.59186934373741	4.3929336894579e-06	2.28501e-05
CNKSR1	50.4909879972646	-1.09592	0.205095116658605	-5.34344934190216	9.11943237819856e-08	7.09853e-07
CNPY4	498.707700658371	0.846614	0.0952419127606912	8.88909446579808	6.16089340602031e-19	6.91201e-17
CNRIP1	1514.8642128919	-0.791847	0.0903460614946954	-8.76459932789053	1.87442096618389e-18	1.86804e-16
CNTN1	4523.86908421235	-0.986003	0.192593980726532	-5.1195936487215	3.06194692233039e-07	2.10373e-06
CNTN3	299.132084700055	-2.19611	0.262678716729278	-8.36042416398238	6.24931593101742e-17	4.22697e-15
COL12A1	222.114203243457	1.49676	0.268605850228385	5.57234332376572	2.51335493873792e-08	2.21185e-07
COL13A1	11.2238747834461	2.16494	0.394548460064847	5.48714230934362	4.08488042966333e-08	3.44439e-07
COL15A1	71.365942289259	1.56898	0.290982385290127	5.39199578882288	6.96794013782127e-08	5.57673e-07
COL18A1	1336.05069450864	0.81908	0.158449358100298	5.16934656782062	2.34913907123616e-07	1.65092e-06
COL1A1	903.745659325204	2.54188	0.297029967124349	8.55764660646833	1.15194840428256e-17	9.34325e-16
COL1A2	1505.48666518382	1.92862	0.236993647610237	8.13786891526922	4.0229605978979e-16	2.15972e-14
COL21A1	58.9822869416106	1.92484	0.321676913907751	5.98377415937269	2.18025566728075e-09	2.46228e-08
COL3A1	1140.69135079473	2.81893	0.320824775741863	8.7865099097369	1.54278080200651e-18	1.57095e-16
COL4A1	2346.37647358068	1.82393	0.261278161929661	6.98078994721425	2.93524899962795e-12	6.22113e-11
COL4A2	2814.84166139642	1.75948	0.236658753288124	7.43465599375381	1.04840440256106e-13	3.08366e-12
COL5A1	307.854897668411	2.30813	0.323980607010603	7.12428668572447	1.04621080894781e-12	2.43199e-11
COL5A2	696.677689977716	1.78765	0.252612072212624	7.07665320080142	1.47677480692293e-12	3.30967e-11
COL5A3	1142.19461354265	0.899809	0.198860421617497	4.52482900945038	6.04443545946461e-06	3.04432e-05
COL6A2	982.938362217796	1.85673	0.2472161324429	7.51054829281569	5.88802290185569e-14	1.85097e-12
COL6A3	171.682389640492	2.55909	0.309824381724534	8.25979698526947	1.45920436237762e-16	8.81924e-15
COL6A4P2	17.2138197218508	-1.34782	0.316218551958457	-4.26231856241077	2.02316749542544e-05	8.95489e-05
COL7A1	305.396417531634	-1.07119	0.222677880856188	-4.81051297153781	1.5054343268915e-06	8.75957e-06
COL8A1	116.473988174639	2.8843	0.386651101571289	7.459686982177	8.67282704075801e-14	2.62087e-12
COL8A2	349.202274530063	1.42465	0.204815443743051	6.95575415116518	3.50680952877724e-12	7.27614e-11
COLEC12	666.640378743206	1.75495	0.22210002714541	7.90162910220258	2.75281522909571e-15	1.23685e-13
COPZ2	179.733607871533	1.17223	0.170842899325084	6.86144948618278	6.81653087381693e-12	1.31259e-10
COTL1	3858.67426734864	0.630119	0.122508747456615	5.1434581469045	2.69726765518951e-07	1.87379e-06
CP	1168.51612339027	2.58457	0.305756495138685	8.45303754400787	2.83820361650976e-17	2.13561e-15
CPA4	8.06817744382542	2.29939	0.359044296306013	6.40419640018705	1.511634240547e-10	2.16695e-09
CPA5	1.53446632848797	2.70174	0.507150097565257	5.32730140899336	9.96826722020144e-08	7.68582e-07
CPEB2	650.95665133106	0.639822	0.12556903085725	5.09537988634036	3.48042632703119e-07	2.36608e-06
CPEB3	296.555376508459	-0.944379	0.114500344865566	-8.24783047851938	1.61295955675136e-16	9.65508e-15
CPLX1	604.798405834064	-1.34908	0.229386106259734	-5.88128115858241	4.0710294837441e-09	4.29959e-08
CPM	843.533822918508	0.99215	0.207810843189193	4.77429451783367	1.80338306015796e-06	1.02793e-05
CPNE5	1019.85966359434	-1.0832	0.197892009179976	-5.47368060150977	4.40783218650646e-08	3.68684e-07
CPNE8	107.724850392718	1.16511	0.252624710362715	4.61203554289021	3.98744789731015e-06	2.09386e-05
CPNE9	23.3125652222202	-1.5943	0.34994754874334	-4.55581502826703	5.21828425508219e-06	2.66839e-05
CPPED1	286.470247495282	1.1506	0.14592157958853	7.88508974352103	3.14309549536566e-15	1.39879e-13
CPVL	620.734167506459	1.35372	0.177037556902474	7.64650741925466	2.06511552078883e-14	7.5423e-13
CPXM2	127.06407170004	1.86264	0.318382954299032	5.85031393437819	4.90646057163156e-09	5.0873e-08
CR1	10.9648783480683	1.97854	0.307387833573668	6.43660809156525	1.22172841559269e-10	1.78552e-09
CRB2	912.125911198035	1.94961	0.224210697070701	8.69545554732224	3.45441032055087e-18	3.25235e-16
CREB5	1066.36798760881	0.658079	0.148176254751681	4.44119277914829	8.94616027363325e-06	4.32444e-05
CRHR1	44.5285044540114	-1.224	0.232431045919184	-5.26607315972258	1.39372760776718e-07	1.03295e-06
CRIP1	73.8551763819028	1.54763	0.211313009502293	7.32388500696107	2.40893131024057e-13	6.42931e-12
CRISPLD1	1527.82302368544	1.44429	0.163093351982161	8.85561800694628	8.32214226985423e-19	8.90992e-17
CRTAC1	810.102006335139	-1.65258	0.198583291081465	-8.32184335707366	8.66057181122882e-17	5.5761e-15
CRTAM	3.11454722875293	2.86459	0.368973784023132	7.76365455858034	8.25164555072494e-15	3.36093e-13
CRTC1	1466.286016406	-0.662145	0.088078532498681	-7.51766938545659	5.57612918345581e-14	1.76999e-12
CRY2	1685.28601419523	-0.946979	0.108804653576835	-8.70347510500314	3.21873025665576e-18	3.06122e-16
CRYZ	542.028867403265	0.714271	0.110444514100099	6.46724069397123	9.98086060442306e-11	1.49751e-09
CSDA	1038.80213202365	0.771193	0.169341422310202	4.55406905612818	5.26180704512211e-06	2.68844e-05
CSDC2	1575.63118237266	-1.3985	0.245260354740024	-5.70209536994993	1.18343581122141e-08	1.12495e-07
CSF2RB	102.388220343473	1.06544	0.178967649148205	5.95323319718486	2.6289627938034e-09	2.9163e-08
CSF3R	482.677421023093	0.676816	0.15152267294422	4.46676133927839	7.94126367514445e-06	3.89394e-05
CSMD1	351.605151271786	-1.21169	0.206298551624312	-5.87349408361005	4.26704266620051e-09	4.47633e-08
CSMD2	705.356845640191	-0.797829	0.154179703232232	-5.17467173342078	2.28312029397628e-07	1.61543e-06
CSMD3	538.528187491361	-2.10167	0.242738380391865	-8.65817271603893	4.7938678886749e-18	4.42453e-16
CSNK1E	4626.97752173785	-0.646311	0.0936777271457672	-6.89930436412518	5.22578003648946e-12	1.03281e-10
CSPG5	4811.23701697935	-0.76464	0.1737557464874	-4.40065949881454	1.07922364443164e-05	5.12816e-05
CSRP1	7379.02776349939	1.08371	0.198345157526364	5.4637691227253	4.66129711402259e-08	3.87807e-07
CST7	13.0770464804621	2.1002	0.277884463884394	7.55780195416287	4.09937566099288e-14	1.3546e-12
CSTA	24.0117107302474	2.31924	0.301114368590061	7.70218856685719	1.3375530821655e-14	5.08324e-13
CTBS	277.374115821031	0.73509	0.114324870600064	6.42983758423759	1.27740360939875e-10	1.85929e-09
CTF1	87.2579274898916	1.39362	0.191565799631906	7.27490073971915	3.46675263280643e-13	8.95905e-12
CTHRC1	65.3203875650212	2.0497	0.300251459733745	6.82662100617739	8.6937967604235e-12	1.63541e-10
CTLA4	7.27091454386987	1.94758	0.29668065473137	6.56457677343508	5.21808544472336e-11	8.3276e-10
CTSA	1969.29336478562	0.738871	0.0859181946657607	8.59970698559247	7.99198815285499e-18	6.82742e-16
CTSB	14989.7819102547	0.769368	0.105983332939294	7.2593280472299	3.89017975529851e-13	9.9252e-12
CTSC	1048.04606291669	1.36814	0.172889134961819	7.91340305783234	2.50446869781878e-15	1.13893e-13
CTSK	201.000206486407	1.27367	0.224255377620454	5.67953766557104	1.35059307475622e-08	1.2665e-07
CTSS	1012.92502819612	1.1905	0.158384780258589	7.51652059961481	5.62532211930784e-14	1.78034e-12
CTSW	16.9842533514708	2.10983	0.305455452141109	6.90715174318007	4.94480936616322e-12	9.9019e-11
CTSZ	1846.263382873	1.12422	0.143804943856398	7.81767615243411	5.38074034508459e-15	2.28085e-13
CTTNBP2	1227.22784457319	-0.891853	0.136990198153924	-6.51034350573992	7.49791459927101e-11	1.15148e-09
CUBN	87.4447249187033	0.784694	0.171007702998181	4.58864941860333	4.46122929277948e-06	2.3186e-05
CUL7	410.494329635248	0.789999	0.132950466659498	5.94205370047182	2.8147317324667e-09	3.09488e-08
CUX2	237.645425806211	-2.03969	0.288668461620929	-7.06585587021606	1.59629034256e-12	3.56473e-11
CXCL10	111.57252980923	3.52763	0.382996190139253	9.21060467760412	3.24292886483304e-20	5.19312e-18
CXCL11	25.00734456243	3.25246	0.356872531094547	9.11378457070871	7.95571891308749e-20	1.10414e-17
CXCL14	918.244544406944	2.05147	0.358211142813922	5.72699090327888	1.02227648093136e-08	9.86779e-08
CXCL9	63.5222240671765	3.66804	0.346701085446902	10.5798246701949	3.6964929094174e-26	2.47348e-23
CXCR2	16.7674152647441	1.13515	0.209795026030897	5.41076148405816	6.27573133140368e-08	5.06819e-07
CXCR3	5.77817051929081	3.22883	0.405054818402834	7.97135233084124	1.56947352534003e-15	7.40697e-14
CXCR4	714.37092889614	1.05102	0.173303334213287	6.0646551754621	1.32237052045975e-09	1.57108e-08
CXCR6	12.2886513255625	2.87881	0.35278042257242	8.16035453236135	3.34042643686812e-16	1.81937e-14
CXorf1	90.7289672320941	-0.933301	0.143392170707529	-6.50872809489473	7.57897627703284e-11	1.16203e-09
CXorf22	3.86795397673383	3.26929	0.52911647490524	6.17877747423722	6.45998722856492e-10	8.17247e-09
CXorf30	5.22610636588084	3.31067	0.635453629146255	5.20993065540395	1.88911224948949e-07	1.35975e-06
CXXC4	57.992692557148	-0.982583	0.18997081504908	-5.1722852387989	2.3124821434066e-07	1.6325e-06
CYB561	432.155133785338	0.943683	0.148328411199986	6.36211791299049	1.98990582284885e-10	2.78646e-09
CYB5D1	553.942582874484	0.631033	0.0915081319787604	6.89592654038997	5.35148455720769e-12	1.05543e-10
CYB5R1	964.098526916477	0.985885	0.131071624743363	7.52172525873499	5.40580899346365e-14	1.7225e-12
CYB5R2	101.988912661936	1.37602	0.282730421736533	4.86690191969699	1.13361251420752e-06	6.81404e-06
CYBA	1043.75274998436	0.877282	0.155508445351238	5.64137988412642	1.68692705049543e-08	1.55161e-07
CYBB	1621.51964309331	0.910882	0.171747843617181	5.30360232503045	1.13539512897006e-07	8.61619e-07
CYBRD1	2120.4238236529	0.717899	0.129635561710101	5.53782642408889	3.06248548545988e-08	2.64418e-07
CYFIP2	3305.95430980763	-0.73906	0.105757545719323	-6.98825189009131	2.78332350898419e-12	5.96663e-11
CYP11A1	24.4467048478127	2.10146	0.346186635969523	6.07030779518089	1.27665327988932e-09	1.51966e-08
CYP1B1	253.404558357454	1.17227	0.254595248053736	4.60445237789141	4.13552633970939e-06	2.16192e-05
CYP27A1	973.800187464013	1.10083	0.185045056880752	5.94898101036262	2.69816937270273e-09	2.9772e-08
CYP27B1	41.9445244189969	2.87389	0.32207739214654	8.92299162781622	4.53859073375945e-19	5.24908e-17
CYP2A6	2.90706003685827	-1.31829	0.298998187140984	-4.40902876622355	1.03835233814101e-05	4.95468e-05
CYP2B7P1	17.676997886323	-1.00118	0.182921407528829	-5.4732853354805	4.41767936953833e-08	3.69178e-07
CYP2E1	81.2869074675816	-0.902166	0.204396272978948	-4.41380903396538	1.0156755944835e-05	4.85823e-05
CYP2S1	36.6218239439647	0.958067	0.161036266794392	5.94938689545364	2.69148752413393e-09	2.97158e-08
CYP39A1	26.8317201104588	1.01686	0.213642636816863	4.75964196639117	1.93936674332952e-06	1.09786e-05
CYP4F11	131.227656694836	1.15698	0.235328733297856	4.91642336029331	8.81396804153823e-07	5.45732e-06
CYTH4	464.058776078531	0.73692	0.156286502628197	4.71518352197673	2.41492982795236e-06	1.33706e-05
CYTIP	76.2069109321233	1.39912	0.180192162965137	7.76459433690949	8.19069506944667e-15	3.34337e-13
DACH2	96.3223848641628	-2.30359	0.288806222677145	-7.97625041417272	1.50845744706762e-15	7.20981e-14
DAPL1	34.1326384815137	-1.41979	0.333812092769648	-4.25326598299429	2.10675088535299e-05	9.28318e-05
DAPP1	43.3452346739521	1.36643	0.197626482093307	6.91418248289252	4.70569116068391e-12	9.4802e-11
DBNDD1	607.857024601671	0.940049	0.193724768020028	4.85249531412468	1.21917665514053e-06	7.27005e-06
DCBLD2	620.540288471867	0.648032	0.133165562580433	4.86636017737016	1.13672277257498e-06	6.83054e-06
DCDC1	2.44110211469664	2.0342	0.423339985901479	4.8051269726434	1.54653326494151e-06	8.9653e-06
DCDC2	46.6040334694164	2.66666	0.275635500695126	9.67459361495751	3.86624600941816e-22	9.78892e-20
DCN	1173.33714214714	0.810422	0.185923170014011	4.35890708848984	1.30713589336265e-05	6.06952e-05
DCTD	908.391437636706	0.839426	0.113425246631177	7.40070217712574	1.35466247280149e-13	3.83398e-12
DDB2	226.252590866993	1.09024	0.150915938342532	7.22417291230979	5.0416075815595e-13	1.25112e-11
DDIT3	719.839097472634	0.912297	0.170027722165668	5.36558064121892	8.06892190455228e-08	6.34674e-07
DDIT4L	165.837985575684	2.84267	0.350792610946566	8.10355937293668	5.33741608913064e-16	2.80904e-14
DDX58	409.146628340677	0.668495	0.137153905825817	4.87405315462073	1.09331551684148e-06	6.61212e-06
DDX60	416.932787827815	0.815345	0.158563611608794	5.14206594931866	2.71733691150139e-07	1.88563e-06
DDX60L	298.10723395431	0.955336	0.148764901203168	6.42178667616886	1.34684079304805e-10	1.95268e-09
DEAF1	1805.97356921511	-0.636243	0.0939723442972417	-6.77053326357688	1.28308578906904e-11	2.33171e-10
DEDD2	281.787198039073	0.60975	0.121242483634903	5.02917853118853	4.9258559201085e-07	3.22245e-06
DEF6	279.408669192194	0.760678	0.147250248488935	5.1658842900528	2.39304806695913e-07	1.68052e-06
DENND1C	122.83533310539	0.778941	0.151214181906786	5.15124131441011	2.58767970621257e-07	1.80233e-06
DENND2A	2077.02793244393	0.732146	0.148691535370833	4.92392762072008	8.48242214839519e-07	5.2747e-06
DENND2D	75.1989764474639	1.85168	0.200252964833008	9.24672498050116	2.31476398204101e-20	3.838e-18
DENND3	916.064515129727	0.656781	0.143693601384102	4.57070140109031	4.86094497772016e-06	2.50618e-05
DERL3	38.1545156586956	1.11775	0.199633478616039	5.59902131899017	2.15565289910728e-08	1.926e-07
DES	49.004604147745	2.31136	0.455624071528761	5.07294348506226	3.91708861402464e-07	2.62391e-06
DGCR10	14.5006002697077	-1.80292	0.221450176472943	-8.1414423165891	3.90596620925957e-16	2.10294e-14
DGCR2	5765.71127162356	-0.625735	0.0755052848677253	-8.28729412489441	1.15853893903021e-16	7.14026e-15
DGCR6	1480.26565566912	-1.10235	0.169283367939118	-6.51186305182179	7.4224376456769e-11	1.1427e-09
DGCR9	121.205141102667	-1.6624	0.179427048265115	-9.26505579284541	1.94975366215721e-20	3.29104e-18
DGKB	610.785292516798	-1.0829	0.201639561339864	-5.37047590288945	7.85291267609532e-08	6.19243e-07
DGKI	125.216302771845	-0.828205	0.178539083558013	-4.63878778148817	3.50458685924595e-06	1.87071e-05
DGKK	14.0305799140346	-3.20752	0.514792060085261	-6.23070192454508	4.64349881846948e-10	6.07971e-09
DHH	5.73691307767414	1.98245	0.326003266798521	6.08106839037241	1.19384353751822e-09	1.42926e-08
DHTKD1	1378.02977485793	-0.695461	0.0897865115298032	-7.74572064699912	9.50412558379812e-15	3.8049e-13
DHX58	322.003467324735	1.06752	0.1592943357657	6.70152640724567	2.06253572890973e-11	3.59811e-10
DIAPH3	64.0518895795112	0.902738	0.177864783886077	5.0754173350408	3.86646425698857e-07	2.60022e-06
DIRAS3	249.870082741823	1.34328	0.248926598634011	5.39630015239403	6.80291064386959e-08	5.45631e-07
DKFZP434H168	2.55127900726755	-1.10782	0.249470100081368	-4.44070998178363	8.96625659048582e-06	4.33304e-05
DKFZp434J0226	32.049371769002	-1.68026	0.354563701731193	-4.73894997247642	2.14828529627416e-06	1.20546e-05
DKFZp686O24166	74.9620175426525	-1.20549	0.200391047921372	-6.01569103788357	1.79120920957388e-09	2.06778e-08
DKK1	37.9749114232714	2.76645	0.396709261997866	6.97350232954163	3.09146315446271e-12	6.50805e-11
DKKL1	3.78966852877433	1.59029	0.36353362422369	4.37452761159942	1.21695719641771e-05	5.70023e-05
DLC1	838.817061840738	0.799538	0.167983411499029	4.75962409037741	1.93953850806506e-06	1.09786e-05
DLEC1	167.011249717672	1.27206	0.241276673434739	5.27222273845661	1.34781361166281e-07	1.00288e-06
DLG3	623.613379820098	-0.693668	0.120756899294874	-5.74433661086864	9.22820519773092e-09	8.9818e-08
DLG4	1969.24279740998	-0.772784	0.124826412225354	-6.19086754662711	5.9833973370366e-10	7.65744e-09
DLGAP1	669.851003526099	-1.31718	0.198717465225017	-6.62842677959096	3.39283343300867e-11	5.60072e-10
DLGAP2	90.1891672481145	-1.38825	0.28867806439441	-4.80898817837871	1.51696176159119e-06	8.8075e-06
DLGAP3	272.482555145236	-1.27637	0.223380723646298	-5.71386566998217	1.10438188033889e-08	1.05948e-07
DLL1	1788.04412887917	-0.9899	0.193549868934113	-5.11444264640804	3.14668678276531e-07	2.1572e-06
DLL3	4518.96242764573	-1.41577	0.26102576344245	-5.42387072340398	5.83220695953322e-08	4.7345e-07
DMC1	2.74338205299213	2.02276	0.342859133070546	5.89966916890026	3.64231155851863e-09	3.88845e-08
DMRTA2	93.4294038408362	3.10125	0.415309430499515	7.46733119200724	8.18376093523545e-14	2.47708e-12
DMRTC1B	94.4239733046412	-0.655959	0.123698707358654	-5.30287298152076	1.13994241075575e-07	8.63995e-07
DMXL2	1141.48957047069	-0.617556	0.0947330163506814	-6.51890727808243	7.08214132949176e-11	1.09662e-09
DNAH11	30.5068517099857	3.47136	0.40926513346542	8.4819264486915	2.2149557629649e-17	1.7008e-15
DNAH12	16.1909900487954	1.42462	0.297404552834752	4.79018316226643	1.666291402005e-06	9.59423e-06
DNAH2	33.5213398774066	2.80231	0.340174091401659	8.23787965543549	1.75289367951287e-16	1.03931e-14
DNAH3	1.67371679959415	4.26468	0.87489709100681	4.87448945812977	1.09090210404095e-06	6.60392e-06
DNAH5	94.2494790822665	2.11073	0.269123639057149	7.84296445402137	4.40032582721338e-15	1.90608e-13
DNAH6	64.3423331824445	1.8788	0.282385307416506	6.65330322347622	2.86586898335555e-11	4.82434e-10
DNAH9	313.411408691159	2.14608	0.25612176782592	8.37914949464624	5.33115261906604e-17	3.67222e-15
DNAI1	19.9449903282249	2.4152	0.336579629063173	7.17572726416137	7.19238109149059e-13	1.73432e-11
DNAI2	6.43597843207696	1.66881	0.369854416222654	4.51206501415904	6.41995016967049e-06	3.20929e-05
DNAJB13	6.79121419813155	2.1611	0.32555786479112	6.63815353173721	3.17636925529314e-11	5.2947e-10
DNAJB7	3.1252039778145	-0.983479	0.216810054778404	-4.536132495357	5.72951931649688e-06	2.90209e-05
DNAJC12	335.095985374425	-0.625109	0.109810027899693	-5.69263745532604	1.25091819226365e-08	1.18072e-07
DNAJC22	32.1036548242894	1.64861	0.205090814376165	8.03842894509496	9.09976012877681e-16	4.52236e-14
DNAJC25	142.725443550215	0.643238	0.089576087861449	7.18091486170525	6.92464666035716e-13	1.67407e-11
DNAJC5B	3.35637941574211	2.03536	0.396971598263279	5.12721527497641	2.94059211623153e-07	2.03003e-06
DNALI1	1008.90484762489	1.27371	0.141660784181811	8.99126665963692	2.44397294276891e-19	3.01195e-17
DNASE1L2	51.1533302805276	-0.850838	0.186386310579474	-4.56491587549573	4.99694679438311e-06	2.56923e-05
DNM3	1539.12586952684	-1.00511	0.125313853105063	-8.02074037011549	1.05109684131408e-15	5.19613e-14
DOC2B	23.3174383513185	-1.17401	0.27295814124821	-4.30107385121866	1.69972396076757e-05	7.67929e-05
DOCK3	905.325318757627	-0.665562	0.119147121536401	-5.58605131090354	2.32290629439476e-08	2.05778e-07
DOK1	398.065738940709	0.611136	0.124991190581983	4.88943102379633	1.01127849318235e-06	6.18587e-06
DOK2	18.3822649065712	1.51099	0.244267407768285	6.18579313752913	6.17909940946041e-10	7.87214e-09
DOK3	199.776122418579	1.15181	0.151135252140354	7.62103426739132	2.51651121178514e-14	8.8961e-13
DOK4	307.134567070834	-0.665302	0.145846656229476	-4.56165239230225	5.07526202091978e-06	2.60378e-05
DOK6	354.66278488238	-1.16871	0.221106711953561	-5.28572000106931	1.25211289713036e-07	9.39376e-07
DOK7	12.4684617428682	1.70095	0.256043611728906	6.64320255799134	3.0693955130372e-11	5.13925e-10
DPEP2	62.4170420995483	0.901853	0.171458872689198	5.25988232846915	1.44147616895415e-07	1.06359e-06
DPF1	471.080941352649	-0.607208	0.131775906367525	-4.60787981579422	4.06795668010111e-06	2.13016e-05
DPP4	31.687143090502	2.64721	0.270567158941778	9.78393522707448	1.31977045993462e-22	3.63636e-20
DPY19L1	1573.77645663371	1.19568	0.122434039629313	9.7659447279065	1.57635890770137e-22	4.21924e-20
DPY19L2P1	21.6081274753914	1.22082	0.287630023967452	4.24440699326828	2.19172246597768e-05	9.63494e-05
DPYD	304.375508012003	2.16213	0.187586109476206	11.526045559935	9.75210786808824e-31	1.82715e-27
DPYSL4	1279.10029655602	-0.587348	0.13378528826505	-4.39023170243026	1.13229944388983e-05	5.34512e-05
DRAM1	208.688114498116	0.66501	0.137635391199716	4.83168219470987	1.35384244436843e-06	7.98413e-06
DRD2	67.1326016707954	-1.05426	0.240068039925388	-4.39151480986885	1.12563666790155e-05	5.315e-05
DRG2	457.158725060424	0.649891	0.137080304205384	4.74094823962742	2.1272027734835e-06	1.19399e-05
DRP2	420.324282323838	-0.671123	0.135561969263562	-4.95067133669721	7.39579122597816e-07	4.66872e-06
DSC2	94.398288352579	1.13972	0.185362764022831	6.1485853546814	7.81770540989354e-10	9.71948e-09
DSCAM	1153.32848357558	-0.993851	0.17268449463694	-5.75530235362301	8.6486857684105e-09	8.47942e-08
DSCAML1	1029.39355341606	-1.25364	0.187945677648992	-6.67020168359036	2.55452126059163e-11	4.36913e-10
DSG2	47.5125640346835	4.63457	0.481453906938341	9.62618984734812	6.19853344322465e-22	1.54848e-19
DSN1	229.886643499635	0.656608	0.109621210230111	5.98979324289869	2.10107972081664e-09	2.38454e-08
DTHD1	16.660588734886	2.37338	0.376807442612405	6.29866579142775	3.00218504490134e-10	4.0496e-09
DTNA	9960.47250690046	0.632341	0.130175421612906	4.8576090985376	1.18811675644622e-06	7.10519e-06
DTX3L	884.148920421684	0.910254	0.133395150474504	6.82373882530392	8.87010826708961e-12	1.66523e-10
DUSP10	191.034629296189	0.87468	0.151639887522274	5.76813931280339	8.01515376857399e-09	7.93301e-08
DUSP26	819.38854202805	-1.19887	0.155195598623265	-7.7248918806064	1.1194832239983e-14	4.41571e-13
DUSP6	908.964635471426	0.958356	0.184861901462843	5.18417366839072	2.16974685323557e-07	1.54278e-06
DUSP8	560.300855741536	-0.741314	0.147643838808607	-5.02096229545033	5.14132519985463e-07	3.34356e-06
DUSP9	63.039629720627	-1.20007	0.246278248051237	-4.87281349855571	1.10020074618288e-06	6.64733e-06
DYDC2	16.7200603019764	2.78649	0.471467704893065	5.91025548015787	3.41577544376548e-09	3.67593e-08
DYNLRB2	32.2658836274006	2.10349	0.276518195403579	7.60705799810263	2.80405501155733e-14	9.78338e-13
DYNLT3	381.791922458835	0.974661	0.180901855101551	5.38778862737236	7.1329869678634e-08	5.69423e-07
DYRK3	95.1580628198126	1.11658	0.130048899087976	8.5858234808698	9.01880562141615e-18	7.54359e-16
E2F7	60.6610556075098	1.72567	0.291308212501972	5.92385081549265	3.14488779072307e-09	3.41779e-08
E2F8	25.5132255590699	1.18976	0.275493619985952	4.31863761528697	1.56995317634097e-05	7.13255e-05
EBF4	1042.50132180677	-0.769106	0.112715379479201	-6.82343709927827	8.8887670640791e-12	1.66707e-10
ECE1	2416.04977645721	0.809102	0.125247777084954	6.46000710661827	1.04698064316361e-10	1.56305e-09
ECHDC2	246.803357833413	1.11278	0.211453381089781	5.26251049171967	1.42101552236785e-07	1.05068e-06
ECM2	692.028921906122	1.90936	0.204054401888171	9.35710329198472	8.19526531939722e-21	1.55097e-18
ECSCR	44.0097384470223	0.998527	0.214419878139648	4.65687715975213	3.21041866948913e-06	1.72846e-05
EDEM2	415.72554212438	0.595719	0.0701022936680486	8.4978515966709	1.93131801709169e-17	1.51402e-15
EEF1DP3	1.85014134459295	-1.35927	0.272830051834613	-4.98211408700335	6.28933337599404e-07	4.02037e-06
EEPD1	1656.80571464713	-0.774378	0.177976219778446	-4.35102051786689	1.35505370087593e-05	6.26562e-05
EFCAB1	58.1220258349317	2.96109	0.40507631037335	7.30995725186774	2.67227386276163e-13	7.07171e-12
EFCAB10	17.7681818802493	3.03041	0.292184238710981	10.3715806023175	3.33954609605468e-25	1.60435e-22
EFCAB4B	10.4101321759355	0.791524	0.171271325076332	4.62146083830137	3.81047270856886e-06	2.01277e-05
EFCAB5	12.2677900426525	-0.955885	0.189549329789057	-5.04293384670394	4.58447780196185e-07	3.02766e-06
EFEMP1	4609.10531893197	1.33986	0.209354499243603	6.39994204752917	1.55435936632386e-10	2.22309e-09
EFEMP2	759.869419484918	1.46333	0.220730599398513	6.62950406991726	3.36816549419151e-11	5.56981e-10
EFHA2	244.849756503974	-0.704194	0.124680105789062	-5.64800298869247	1.62322356232071e-08	1.50186e-07
EFHC1	600.178073195542	0.593978	0.109617710178166	5.41863402571661	6.00561098225186e-08	4.87104e-07
EFHC2	61.5559709455595	2.53778	0.282535236387348	8.9821666352157	2.65486357216138e-19	3.18856e-17
EFNA3	288.49839760229	-0.687871	0.152225490885004	-4.51876119480786	6.22025041969197e-06	3.12363e-05
EFNB2	533.518292764243	0.92229	0.161356848803133	5.71583756896513	1.09164977180925e-08	1.04888e-07
EFS	1854.54875666645	-0.698086	0.111595716772807	-6.25549167263801	3.9626548732826e-10	5.26555e-09
EGFLAM	70.5325957083234	1.23535	0.242792616323573	5.08808797653928	3.61691584133545e-07	2.45087e-06
EGFR	6605.97820350393	1.58893	0.303673765378724	5.23234718946854	1.67371003607247e-07	1.21781e-06
EHD2	1161.90297749901	0.900014	0.154987993345725	5.80698881963357	6.36063821197563e-09	6.43482e-08
EHD3	1196.50632220885	-0.634194	0.129868785893108	-4.8833412389929	1.04303134642891e-06	6.35107e-06
EID3	21.4031786660706	1.50769	0.238423517507488	6.3235819654953	2.55568538955671e-10	3.51051e-09
EIF3L	6497.14489624735	-0.594182	0.0986240305873928	-6.02471809208346	1.69404633106721e-09	1.96774e-08
ELAVL2	230.488155191319	-1.29469	0.235919519440078	-5.48785923434771	4.06834056323939e-08	3.43199e-07
ELF3	11.2551423389203	0.86	0.200697327562968	4.28505834072205	1.82691240436288e-05	8.18485e-05
ELF4	132.707343892224	0.903438	0.143148180889253	6.31121148539687	2.76859547906695e-10	3.7616e-09
ELFN2	1664.06789623989	-1.54191	0.196140886059272	-7.86123311111229	3.80370154111327e-15	1.66122e-13
ELK3	256.778591495167	0.710652	0.157993940295314	4.49796684550718	6.86063926849485e-06	3.39876e-05
ELL3	40.5508690192488	0.809169	0.124520169337705	6.49829443966842	8.12356955298568e-11	1.23542e-09
ELN	1771.29599061699	0.877067	0.177735687894419	4.93466894896931	8.02868218754011e-07	5.02591e-06
ELOVL1	1405.19277378997	0.770585	0.140597499314467	5.48078785644377	4.23435968193611e-08	3.55125e-07
EMB	186.975601021905	1.17701	0.180252954954044	6.5297819347163	6.58655170698405e-11	1.02667e-09
EMILIN1	837.422160473407	1.15867	0.176639877537744	6.55951101982596	5.39845043223291e-11	8.59349e-10
EMILIN2	197.549143776371	1.09548	0.25551508314028	4.28735006901166	1.808172204994e-05	8.12615e-05
EML5	89.2553451841468	-0.731925	0.0951726833022008	-7.69049136582789	1.4657102087292e-14	5.51437e-13
EMP2	383.212832297829	0.791916	0.18422387283814	4.29866332166145	1.718312586481e-05	7.75766e-05
EMP3	558.580592619993	2.3092	0.326268332596568	7.07761089107175	1.46660826851361e-12	3.29082e-11
EMR1	39.7474678067711	2.58219	0.390933162790851	6.60519098889027	3.97005187082944e-11	6.46808e-10
EMR2	122.80631631497	1.08545	0.228289049228928	4.75472809956621	1.98713672392806e-06	1.12142e-05
EMR3	0.921028669346158	2.96277	0.668318116928636	4.43317829812208	9.28540152256923e-06	4.47342e-05
ENG	1502.71040206916	0.819402	0.123375307604539	6.64154245348677	3.10417312774854e-11	5.18821e-10
ENHO	2898.08222620491	-0.838147	0.173717142002813	-4.82478011573109	1.40157807612063e-06	8.22938e-06
ENO2	5280.35984850827	-0.773838	0.116402646851261	-6.64794518298563	2.97212947670148e-11	4.99424e-10
ENPP1	64.8011905670113	1.56901	0.207388862516687	7.56557010858775	3.86167171137424e-14	1.28512e-12
ENTPD2	308.761752641513	1.67925	0.284042721902447	5.91196191198072	3.38056720429369e-09	3.64432e-08
EOMES	3.54971381497788	2.94748	0.42181235558902	6.98766563713377	2.79497509946787e-12	5.98476e-11
EPDR1	1000.68425422961	0.648473	0.12666319926665	5.11966023933022	3.0608659914909e-07	2.10373e-06
EPHA1	2.68467224374731	2.65761	0.390818055440192	6.80011800331299	1.04533492157621e-11	1.93723e-10
EPHA10	91.9544258225775	-1.08317	0.222683563165651	-4.86415327287866	1.14947815274069e-06	6.89834e-06
EPHB1	1592.47782552127	-1.13776	0.188755620078926	-6.02767064288729	1.66339587597115e-09	1.93638e-08
EPHB2	522.119279499792	0.707157	0.146104100520029	4.84008936682779	1.29780754757584e-06	7.68879e-06
EPHX3	9.83061883683396	1.84025	0.26331443883929	6.98879384876576	2.77259463217399e-12	5.95044e-11
EPS8L1	9.57998930289237	0.981787	0.181308493744471	5.41500891381271	6.12856527103461e-08	4.95575e-07
EPSTI1	108.508014268805	1.30807	0.227372140706375	5.75297062545292	8.76887267487716e-09	8.58378e-08
EPX	3.84384754778315	-0.834058	0.173025428125251	-4.82043877518231	1.43242814351906e-06	8.38949e-06
ERBB2	937.445379184382	0.985811	0.146879543595604	6.71170041362153	1.92369343765036e-11	3.37791e-10
ERC2	235.941067918156	-0.793153	0.175327653138531	-4.52383504140355	6.0729062779454e-06	3.05701e-05
ERCC6L	23.8730192437219	0.958435	0.220866055835015	4.33944192567624	1.4284500870624e-05	6.57094e-05
ERI1	335.53413227838	0.61167	0.0915402225061252	6.68197717728754	2.35739746969302e-11	4.05958e-10
ERMAP	389.425566655074	0.721198	0.0904620204609923	7.97238336558075	1.55643103888237e-15	7.36396e-14
ERP27	12.2639892225685	2.29558	0.276261115023402	8.309455847581	9.6141919682445e-17	6.10615e-15
ESM1	40.359982726741	2.65446	0.431030435823554	6.15841008387101	7.34788836881359e-10	9.19026e-09
ESPNL	14.8118187001694	1.9051	0.390755901287472	4.875434659529	1.0856912943119e-06	6.57663e-06
ESR1	14.3772420162509	1.04915	0.197121379260085	5.32233027808145	1.02446351438077e-07	7.87945e-07
ESRRB	10.644124332001	0.964025	0.199954741139478	4.82121386269611	1.42687281684611e-06	8.35957e-06
ESX1	5.04487764456657	-3.24729	0.661902222829064	-4.90600160965214	9.29517619102805e-07	5.74009e-06
ETV4	187.54869294914	1.64957	0.375554997023684	4.39234057614816	1.12136853402135e-05	5.30019e-05
ETV7	23.1715544270834	2.09566	0.316987104774645	6.61119732955574	3.81223907834195e-11	6.24354e-10
EVC	185.813689823286	1.54735	0.23607100767681	6.55460896176846	5.57878683031273e-11	8.85798e-10
EVC2	38.631047681522	2.12569	0.305057147330656	6.96817305932886	3.21083117253278e-12	6.72158e-11
EVI2B	492.47696517497	0.993387	0.167089875203184	5.94522640015253	2.76075013410261e-09	3.04446e-08
EXO1	72.4903624479247	1.35574	0.287808697298453	4.7105765096267	2.47017044553786e-06	1.36362e-05
EXOC3L2	6.41026555881808	1.98357	0.336105796833704	5.90163529264807	3.59916099311379e-09	3.85321e-08
EYA2	297.862695808146	1.40113	0.247676300947585	5.65710856174369	1.53944396007503e-08	1.43142e-07
EYA4	109.396495766447	2.88725	0.375193845950901	7.69534544433897	1.41112409320514e-14	5.34118e-13
EYS	15.4247895771803	-1.48355	0.18770839332501	-7.90348843570226	2.71204327540014e-15	1.22146e-13
F11R	403.25578948828	1.2084	0.144045668314889	8.38900601988882	4.90269600478754e-17	3.41476e-15
F13A1	460.150457137644	2.98809	0.330571656974023	9.03914719842366	1.57898813437066e-19	2.04027e-17
F2RL2	47.7735979691284	3.75384	0.336952933685572	11.140542244504	7.96330105397268e-29	1.06572e-25
F3	2198.38861449385	1.36246	0.238019387875633	5.72414327041363	1.03956995090815e-08	1.00192e-07
FABP4	18.4015471231581	-1.50406	0.326447499832402	-4.60734242963166	4.07848049724294e-06	2.13508e-05
FABP5	94.2467963819509	2.50394	0.319264691474908	7.84282922387026	4.40506893487693e-15	1.90608e-13
FABP7	2086.591436739	1.41443	0.263506871399128	5.36773056163393	7.97335473001543e-08	6.27684e-07
FAH	314.89605341763	0.692486	0.125811799580378	5.50414138505938	3.70971754849524e-08	3.1536e-07
FAHD2B	170.316375353163	1.12601	0.222130402209802	5.06913870546474	3.99619933293185e-07	2.67021e-06
FAIM2	7223.95430469663	-0.92638	0.143885666636849	-6.43830514202041	1.20814930940881e-10	1.76705e-09
FAM101A	76.7380773892169	-0.774985	0.177673425450326	-4.36185232258867	1.2896591099368e-05	6.00473e-05
FAM106C	15.2360518064609	-0.904815	0.199631791159613	-4.53241744524699	5.83124683656007e-06	2.94454e-05
FAM109B	70.0709814420827	1.05236	0.141169611287109	7.45457304252008	9.01593169718454e-14	2.70276e-12
FAM110A	171.013431693364	-0.802544	0.157090390697557	-5.10880116390326	3.24209314410045e-07	2.21693e-06
FAM110B	1659.23712191936	-1.12754	0.146931265215678	-7.67391982503236	1.66818372668553e-14	6.23854e-13
FAM110C	4.60055347137142	2.05687	0.408261028954372	5.03811806899016	4.70131417891097e-07	3.09392e-06
FAM111A	556.421079297052	0.672189	0.108143194863237	6.21572978250067	5.10866533304476e-10	6.61573e-09
FAM113B	107.792751431891	1.03899	0.142910679577896	7.27020846976754	3.58933138314656e-13	9.2503e-12
FAM114A1	147.673827212962	1.53369	0.177410636052793	8.64485688430559	5.38727777227403e-18	4.85269e-16
FAM115C	131.952631500698	1.15368	0.210578316293794	5.47861278629444	4.28673305024574e-08	3.59196e-07
FAM119B	288.010221559722	1.78659	0.20701406626259	8.6302735723937	6.12054031351615e-18	5.46069e-16
FAM123C	133.545763714434	-1.56175	0.307983117088409	-5.07090318529073	3.95932162524799e-07	2.64841e-06
FAM126A	555.652426750623	0.923465	0.127282963762429	7.25521367996361	4.01028232977001e-13	1.01811e-11
FAM129A	456.018067702904	1.73997	0.211867926921954	8.21250704812235	2.16617339628149e-16	1.24495e-14
FAM133A	131.177675152208	-1.29226	0.194828357236086	-6.63281720966181	3.29339563048213e-11	5.45098e-10
FAM134B	866.378330342112	0.666592	0.132613076117282	5.02659162443836	4.99273991823012e-07	3.26164e-06
FAM13C	465.078789168103	-0.766109	0.137494997401369	-5.57190098529331	2.51974623476209e-08	2.21435e-07
FAM150B	9.98496933703261	1.36421	0.285425544357979	4.77956777247209	1.75672448856242e-06	1.00439e-05
FAM155A	439.194712056606	-1.20237	0.177270213773117	-6.78271585750008	1.17937455499955e-11	2.16e-10
FAM159A	13.1288319650369	1.09802	0.208196922129401	5.2739277048256	1.33534528222689e-07	9.95584e-07
FAM163B	64.9621161424386	-1.48872	0.327531155213318	-4.54527763858178	5.48628888827855e-06	2.78869e-05
FAM164C	50.0156837284959	1.27252	0.175818707102883	7.23766529317369	4.56474257393614e-13	1.14491e-11
FAM166B	21.4202429860822	1.81214	0.278346228902434	6.51037474031279	7.49635562665659e-11	1.15148e-09
FAM171A2	450.685873593573	-0.640877	0.130310922090205	-4.91806135099857	8.74055210666156e-07	5.41723e-06
FAM176B	94.6875703338694	0.722599	0.169589400952612	4.26087152911077	2.03631267215958e-05	9.00882e-05
FAM177B	10.2933789954751	1.61256	0.301738118520204	5.344221019788	9.08067137020673e-08	7.0713e-07
FAM178B	40.8375569764802	1.32993	0.256513384042225	5.184660466164	2.16408750972466e-07	1.53993e-06
FAM180B	18.9235937016371	1.51073	0.328913369502989	4.59310421245579	4.36700843052392e-06	2.27279e-05
FAM181A	246.654647794037	1.58014	0.280039139322159	5.64256705848809	1.67533250381297e-08	1.54398e-07
FAM183A	30.2525916531239	7.40512	0.720502975797717	10.2777045798149	8.88176818481306e-25	3.45278e-22
FAM188B	192.515000956226	0.835935	0.17687236023783	4.72620496104787	2.28754759760689e-06	1.27331e-05
FAM190B	2038.561946657	-0.634133	0.0823121391620012	-7.70400083199224	1.3187098940185e-14	5.04232e-13
FAM198B	1787.71492920134	0.854845	0.180699235688029	4.73076429990028	2.23676103118387e-06	1.24912e-05
FAM19A1	52.0397552020112	-1.54313	0.348152476509504	-4.43233003790553	9.32201795731185e-06	4.48875e-05
FAM19A2	143.274842034268	-1.46969	0.235250764761574	-6.24732669957328	4.17537139056164e-10	5.51302e-09
FAM19A3	7.88015440777787	2.09444	0.413890439062998	5.06036935454115	4.18445093689099e-07	2.78706e-06
FAM19A5	1464.31145417882	-0.606599	0.109938675864607	-5.51761040821393	3.43640191956524e-08	2.94127e-07
FAM20A	67.6203797851425	1.68842	0.247379858810501	6.82523169659032	8.7783520027941e-12	1.64966e-10
FAM20C	1613.98913598697	1.04069	0.163652890098446	6.35911046300574	2.02925442936263e-10	2.83521e-09
FAM26F	60.8993606254823	1.41982	0.228190265922463	6.22206731596852	4.90646424401195e-10	6.39718e-09
FAM46A	333.533936399883	0.874889	0.169413976912524	5.16420664295564	2.41460833651092e-07	1.69248e-06
FAM46B	43.780465513681	1.94702	0.291302012890212	6.68384611582292	2.32751214256552e-11	4.0118e-10
FAM50B	169.670213385844	0.950458	0.199565847827682	4.76262639435002	1.91089432060921e-06	1.0823e-05
FAM54A	16.8133184046004	1.03314	0.204893930783621	5.04231308681393	4.59937939398444e-07	3.03536e-06
FAM57B	558.53578002742	-1.18388	0.175485351617656	-6.74630648788375	1.51656098272923e-11	2.70507e-10
FAM65C	77.0024242452888	1.81533	0.243537628932154	7.45401600290778	9.05410087455254e-14	2.70987e-12
FAM70B	31.8601112671733	0.984249	0.161397657834634	6.09828826004192	1.07210286564423e-09	1.29176e-08
FAM72A	11.803746572077	0.716583	0.153852310534113	4.65760043529877	3.19916360691557e-06	1.7229e-05
FAM72B	76.0111620067294	0.656732	0.141322102449984	4.64705675218187	3.36704556124348e-06	1.80552e-05
FAM78B	51.6589478631287	1.04692	0.201285216874407	5.20116493527732	1.98043250321033e-07	1.42009e-06
FAM81B	41.6836048669639	5.60335	0.61646119535718	9.08953819862524	9.94606012188923e-20	1.36021e-17
FAM84B	2293.54037084669	-1.06793	0.162562927723396	-6.56931256437243	5.05480787306839e-11	8.09461e-10
FAM86C	88.2683393182214	0.581815	0.108605723153082	5.35713258855285	8.45530736694675e-08	6.62009e-07
FAM92B	2.21823258280756	4.83686	1.01208161060986	4.77912436075426	1.76060275561172e-06	1.0063e-05
FANK1	50.0742454287441	1.058	0.191687625378573	5.51939798764179	3.40162995481823e-08	2.91684e-07
FAR2	113.804640814001	0.917963	0.157741028104647	5.81943376225717	5.90473174838849e-09	6.00929e-08
FAS	167.709551228082	1.15934	0.210628193216682	5.50420064300201	3.70847011945589e-08	3.1536e-07
FASLG	1.71613928086355	3.43255	0.479848778192728	7.15339612367858	8.46568513434396e-13	2.00269e-11
FBLL1	255.175831607179	-0.880699	0.179682299227522	-4.90142099096908	9.51459148658886e-07	5.86592e-06
FBLN5	581.663414690399	1.73961	0.234896558050147	7.40586915897728	1.30294249586518e-13	3.70439e-12
FBLN7	104.669864130338	1.549	0.316908765752826	4.88784315928419	1.01946694907117e-06	6.22671e-06
FBP1	103.167718326324	1.26151	0.171317043574784	7.36357854122037	1.79044372306188e-13	4.94775e-12
FBXL13	10.0965002066503	1.63975	0.197829731293331	8.28868466214621	1.14507679393246e-16	7.08058e-15
FBXL16	2696.13773035167	-0.96248	0.201203305051925	-4.78361773313271	1.72167970800432e-06	9.87068e-06
FBXO17	207.703286051552	1.4722	0.270021737677935	5.45216585013016	4.97600143229243e-08	4.10887e-07
FBXO41	751.534907567604	-0.855958	0.180056746573974	-4.75382301120074	1.99605791276854e-06	1.12577e-05
FBXO43	11.519450035297	1.20571	0.200655633171363	6.00887000517987	1.86820840468859e-09	2.14272e-08
FBXO44	1688.9948324689	-0.587618	0.101540527059733	-5.78703011330495	7.16417395915831e-09	7.15501e-08
FBXW12	1.19840538799466	-1.48471	0.320112330896547	-4.6380913514292	3.51641369192033e-06	1.87489e-05
FCER1G	638.029702688066	1.05741	0.156912466808215	6.73883002183418	1.59667053606724e-11	2.84095e-10
FCGBP	4479.4105303342	1.42787	0.266377398315721	5.36033255627847	8.30688908019807e-08	6.51477e-07
FCGR1A	451.132951170707	0.863825	0.180966978387678	4.77338320194355	1.81156627870272e-06	1.03124e-05
FCGR1C	167.118539040817	0.831547	0.187289166160141	4.43991085108417	8.99961502463409e-06	4.34803e-05
FCGR2A	862.201108083946	1.15168	0.165642675982126	6.95279733107519	3.5811299581274e-12	7.41393e-11
FCGR2B	51.7533217846388	3.54237	0.327073221757362	10.8305116376619	2.46772586680934e-27	2.43344e-24
FCGR2C	32.2266887861784	2.91501	0.274138422837973	10.6333479913087	2.08490752887457e-26	1.44677e-23
FCGR3A	2306.11898479673	1.67606	0.221873059227442	7.55414986099751	4.21604521770534e-14	1.38826e-12
FCGR3B	23.8883385156004	1.4317	0.293972243934721	4.87018670625864	1.11492848278585e-06	6.71898e-06
FCHSD1	181.050043447894	0.726251	0.152147310049721	4.77334269642037	1.8119308275755e-06	1.03124e-05
FCHSD2	2731.2335640192	-0.863698	0.0991063333635411	-8.71486208150038	2.91112843245696e-18	2.79707e-16
FCRL6	3.57075495615598	1.34002	0.301586571762612	4.44324404295819	8.86125583440152e-06	4.29004e-05
FER1L4	7.70152755104715	1.61418	0.28916910471185	5.58213816701904	2.37579515461695e-08	2.0967e-07
FERMT1	1413.46947977763	-1.3033	0.252514609366914	-5.16128122353341	2.4526540661831e-07	1.7153e-06
FERMT3	473.403069021936	0.774262	0.155755146113214	4.97102127081614	6.66011412824615e-07	4.24291e-06
FES	220.296765369338	0.777784	0.133643742327966	5.81983100517337	5.89071564579655e-09	5.99829e-08
FGF1	4845.50445213292	1.06808	0.181862745289921	5.87299269504701	4.27997340043397e-09	4.48739e-08
FGF12	546.681224855068	-1.26396	0.158535983918151	-7.97267817265032	1.55272142536297e-15	7.36396e-14
FGF14	283.779710340508	-0.775764	0.177363594849591	-4.37386423540445	1.22066309743879e-05	5.71473e-05
FGF20	8.64873393624892	1.04722	0.195679839136235	5.35167825416793	8.71422385610532e-08	6.80574e-07
FGF9	68.1309828687637	-1.15351	0.236267947890135	-4.8822025840286	1.04907396453497e-06	6.38164e-06
FGFRL1	765.673147070302	1.07492	0.201381573352195	5.33773135820256	9.41167679145624e-08	7.30175e-07
FGL2	492.093504055155	1.2107	0.187143641314725	6.46936834857855	9.84134298001512e-11	1.47865e-09
FGR	185.576384251081	0.667396	0.152515765178641	4.37591297099684	1.2092525863242e-05	5.67362e-05
FHAD1	31.4880577671229	2.99526	0.278741992967573	10.7456268555279	6.21383721863711e-27	5.29193e-24
FHDC1	286.512827633068	-1.04467	0.205871268312006	-5.07440308575879	3.88714281363944e-07	2.61131e-06
FHL3	487.61906118911	0.631544	0.119090119461659	5.30307916039408	1.13865515121465e-07	8.63369e-07
FILIP1L	422.360427598881	1.15396	0.205248830660291	5.62223875529855	1.88498497223168e-08	1.71442e-07
FKBP10	2023.50862073955	1.01649	0.154267782008365	6.58913323853227	4.42401642509345e-11	7.12712e-10
FKBP9	1403.01749879509	1.26531	0.158310247548562	7.99257009887939	1.32154323547354e-15	6.44803e-14
FKBP9L	35.086021396345	1.14269	0.221892815542896	5.14975057102539	2.60833098709244e-07	1.81604e-06
FLJ10661	8.20048317211709	0.918811	0.214691815777395	4.2796753720659	1.87166109194213e-05	8.35934e-05
FLJ11235	20.5016158426566	0.824831	0.161444460257543	5.10906747506176	3.23752727195148e-07	2.21462e-06
FLJ26850	14.928649907555	1.93172	0.236195070686364	8.17850467877855	2.87387844241938e-16	1.58835e-14
FLJ35776	84.2401998608388	0.724377	0.143593491581312	5.04463608483633	4.54385344580021e-07	3.00401e-06
FLJ36777	6.72991585201243	1.25405	0.225439167706782	5.56269603634884	2.65638356593365e-08	2.32852e-07
FLJ42627	67.7694898313842	-0.740942	0.119793020690514	-6.18518672377072	6.2029003369697e-10	7.89521e-09
FLJ45244	136.582209583622	-0.671202	0.155527990480476	-4.31563217058159	1.59146794156611e-05	7.21979e-05
FLNA	9478.40048901069	0.742929	0.138692369612144	5.3566699283459	8.47697742952515e-08	6.63428e-07
FLNC	2122.6649860649	2.11528	0.255151781452249	8.29026667715329	1.12994840389746e-16	7.01017e-15
FLRT1	512.689980632736	-1.04936	0.142542473402265	-7.36170994010326	1.81569173898439e-13	5.00276e-12
FMO4	57.1742696221636	0.821663	0.124363906539156	6.60692838887632	3.92375717185576e-11	6.40937e-10
FMOD	525.355190366099	3.38291	0.327191725802307	10.3392217172313	4.68325430690133e-25	2.08918e-22
FN1	10260.6534872611	1.35245	0.201365062678977	6.71639930013452	1.86269928206885e-11	3.28312e-10
FNDC1	38.8105927783758	1.76083	0.3866949548279	4.5535336058611	5.2752239959497e-06	2.69456e-05
FNDC3B	510.848642319185	0.835144	0.117199100553666	7.12585949555897	1.03433188963819e-12	2.40736e-11
FNDC7	12.7812255363795	2.21623	0.344515733053747	6.43289146026579	1.25199057861744e-10	1.82689e-09
FOLR1	51.4084335603883	2.1367	0.296645783832793	7.2028779623133	5.89547358828347e-13	1.44318e-11
FOXD4	17.690410614534	-0.691607	0.161869298498546	-4.27262407277079	1.93185996276399e-05	8.59542e-05
FOXD4L2	8.98007300912632	-0.969265	0.201900916666989	-4.8006950462767	1.581158907393e-06	9.14339e-06
FOXJ1	636.885310784561	2.80612	0.262969293393956	10.6709182485567	1.3924345566683e-26	1.00341e-23
FOXL1	10.7809195483176	0.930042	0.198178594489358	4.6929490255473	2.69294608660147e-06	1.47529e-05
FOXM1	615.347935273608	1.28124	0.258425000145154	4.95789224223897	7.12620675099018e-07	4.52139e-06
FOXP3	9.37833081954617	0.937955	0.1839671033567	5.09849142429801	3.42371040621918e-07	2.33261e-06
FPGT	257.517685347271	0.61303	0.0822081550585601	7.45704841952638	8.84821943795993e-14	2.661e-12
FPR3	134.477073475304	1.4628	0.261326460153175	5.59758465181187	2.17358728400232e-08	1.94018e-07
FRMD4B	357.457693928976	0.813965	0.154726206103628	5.26068003359954	1.43523598480474e-07	1.05994e-06
FRMPD1	80.8963990382907	-0.93234	0.166849088987733	-5.58792171505287	2.29803189400984e-08	2.04057e-07
FRRS1	9.56163673735312	1.58105	0.267552516259374	5.909301643038	3.43561092054185e-09	3.69516e-08
FRY	1703.84238379549	-0.98103	0.107312148569387	-9.14183114698945	6.14036570908697e-20	8.84968e-18
FSD1	636.714409932263	-0.744292	0.143119762866934	-5.20048625726669	1.98767816475248e-07	1.42414e-06
FSIP1	24.7758154423369	1.39687	0.183554603988361	7.61009004568909	2.73905024620213e-14	9.59231e-13
FSTL1	2454.80108417288	2.01306	0.149097820802168	13.5015905815065	1.53036067274774e-41	1.43364e-37
FTL	35455.3203843083	0.980527	0.129621787852095	7.56452645299577	3.89280116080452e-14	1.29318e-12
FUCA1	402.815771291035	0.789544	0.106793306279124	7.39320080309434	1.43335760710116e-13	4.04449e-12
FUCA2	651.339345811899	1.01775	0.126459672733214	8.04801807230261	8.41455255485697e-16	4.20413e-14
FUT3	14.3384814654734	-1.55031	0.304199583498246	-5.09636687772077	3.46233832990322e-07	2.3555e-06
FUT5	6.71135869362255	-1.32179	0.272435058376095	-4.85176370756776	1.22368363336856e-06	7.28765e-06
FUT6	2.28539367156559	-1.60293	0.334661763511381	-4.78969328154256	1.67036437012599e-06	9.61327e-06
FUT9	1269.26988731667	-1.03223	0.155962187496047	-6.61843912486	3.63011337023507e-11	5.96089e-10
FXYD2	9.23546855611867	-1.35054	0.234653275655086	-5.75546855447323	8.64018050345768e-09	8.47942e-08
FXYD5	521.79209724616	1.01298	0.158935120342509	6.37354763222476	1.84704874887841e-10	2.6059e-09
FXYD6	18110.0384085169	-0.909064	0.134364347386367	-6.76566311220664	1.32699997586596e-11	2.4041e-10
FYB	721.100252727381	1.07332	0.173789572345823	6.17599892120905	6.57464357435828e-10	8.28396e-09
FZD1	398.464872086897	0.942485	0.126654856456012	7.44136330523365	9.9651466123022e-14	2.94956e-12
FZD2	98.2025291823021	0.829235	0.147298889864642	5.62961018228041	1.80617362159689e-08	1.64915e-07
FZD3	331.04850335201	0.613207	0.124488420388995	4.92581207551692	8.40107101423397e-07	5.22758e-06
FZD5	142.456381510247	0.591904	0.131171251845944	4.51245104331984	6.40827294073785e-06	3.20543e-05
FZD6	163.079763718027	1.3503	0.202832384238386	6.6572062865025	2.79081363202124e-11	4.71069e-10
G6PC2	3.1836184172271	-2.57257	0.418802248235398	-6.14268312097199	8.11390506239224e-10	1.0061e-08
GAB3	159.792707100572	0.770977	0.128749928724683	5.9881714765634	2.12213264230461e-09	2.40474e-08
GABBR1	8411.65450768642	-1.4036	0.152356875373971	-9.21258836772976	3.1835387486939e-20	5.14196e-18
GABRA1	364.880710548493	-1.78204	0.386206621241169	-4.61422435551744	3.94566034485005e-06	2.07657e-05
GABRA3	223.57246195458	-1.3423	0.228735548323918	-5.86835394255312	4.40142882884057e-09	4.59928e-08
GABRB2	301.655298145945	-1.62992	0.351672608067299	-4.63477014519599	3.5733430759855e-06	1.90253e-05
GABRB3	945.207124662072	-1.23294	0.221103326148185	-5.57630996043061	2.45674022573631e-08	2.16406e-07
GABRD	396.518917726955	-1.29384	0.276688634696436	-4.6761575485557	2.92300074815248e-06	1.5874e-05
GABRG2	351.277627193114	-1.61806	0.351788208086269	-4.59952440040474	4.23456593414122e-06	2.21184e-05
GAD1	1061.15523216816	-1.60173	0.191885678779519	-8.34730518282004	6.9838093915217e-17	4.61762e-15
GAD2	82.2282796135445	-1.65799	0.38425205941585	-4.31483944508957	1.59718941436131e-05	7.24224e-05
GAL3ST4	849.629011718603	0.785722	0.112632916384051	6.97595583720194	3.03798156248058e-12	6.40266e-11
GALC	975.235462866667	0.613202	0.143487284085196	4.27356587735832	1.92371412618858e-05	8.56325e-05
GALM	214.557664697783	0.826784	0.110196987774562	7.50278312933098	6.24768733561543e-14	1.9542e-12
GALNS	354.77208264344	0.599457	0.073986379983121	8.10225988394465	5.39475466166692e-16	2.83126e-14
GALNT12	30.349891252402	1.3384	0.176333519895662	7.59018088672662	3.19459207256979e-14	1.09422e-12
GALNT13	2445.20688724734	-1.52394	0.201164395690824	-7.5755883518909	3.57503710538348e-14	1.19611e-12
GALNT3	50.5536231486273	2.39302	0.273252202109495	8.757561287691	1.99519995564223e-18	1.97789e-16
GALNT4	185.929074387293	0.854736	0.123446217496063	6.92395469611378	4.39206422862909e-12	8.91671e-11
GALNT5	18.3502199158492	4.39749	0.729515229000934	6.02795779401373	1.66044395583927e-09	1.93471e-08
GALNT6	127.34204522392	0.938961	0.213362419373345	4.4007810900838	1.07861900654958e-05	5.12659e-05
GALNT9	501.266550461313	-1.50269	0.282487217979364	-5.31951206423803	1.04045914465851e-07	7.98609e-07
GALR3	2.21867896471035	-1.58295	0.293536428279908	-5.39268346285699	6.94131685083571e-08	5.56018e-07
GAPT	53.7282454965974	1.8897	0.202791184741687	9.31845260277334	1.18049319440808e-20	2.1267e-18
GARNL3	328.329051689598	-0.644268	0.109581417909021	-5.87935577059188	4.11866290058309e-09	4.34333e-08
GAS2L2	18.767636206263	2.75017	0.361614263339844	7.60526802209356	2.84314052461038e-14	9.88295e-13
GAS2L3	31.0430704652811	1.22236	0.28024199334249	4.36179547838116	1.28999429894277e-05	6.0048e-05
GAS8	473.66311098864	0.592107	0.104952521477994	5.64166404267838	1.68414474041121e-08	1.54981e-07
GATA4	5.41288857452605	4.81794	0.768255343593958	6.27127885200464	3.58094636218672e-10	4.77868e-09
GATSL3	563.738178901115	-0.688674	0.143873726286725	-4.78665505250718	1.69583934271995e-06	9.74042e-06
GBA3	2.98966790352083	2.97399	0.561774332027685	5.29393176117871	1.19714119921639e-07	9.03692e-07
GBGT1	137.686052984041	0.818883	0.143247340700196	5.71656846166634	1.08696689311416e-08	1.04492e-07
GBP1	1053.7805814942	1.96396	0.23437436730374	8.37959178158953	5.31115859899602e-17	3.67195e-15
GBP2	1531.59122783208	1.17796	0.253354341431327	4.64944690695476	3.32826342644875e-06	1.78626e-05
GBP3	626.374421697301	1.34784	0.217413669449798	6.19942743708091	5.66689365844661e-10	7.29223e-09
GBP4	372.807658463329	1.13807	0.180051573805025	6.32077331711578	2.60257568275521e-10	3.56446e-09
GBP5	85.352650237266	3.29506	0.271703038621605	12.1274194333224	7.55941939483743e-34	2.36055e-30
GBP6	9.22491537805421	1.52848	0.33001735602535	4.63151313571896	3.63002962530167e-06	1.92833e-05
GCA	408.906032092183	0.806328	0.10289420402073	7.83647727782895	4.63362153104405e-15	1.98209e-13
GCET2	2.66214037976404	1.53215	0.310510307562368	4.93430164159114	8.04380456542854e-07	5.03201e-06
GCH1	59.9260386050744	1.08827	0.18098952125981	6.01287491483395	1.82261673038262e-09	2.09758e-08
GCK	77.1103168102106	1.4064	0.239236127062498	5.87869417121032	4.13515551586665e-09	4.35505e-08
GCLM	240.546508460091	0.637566	0.105407387668953	6.04859259670671	1.46116633115913e-09	1.72287e-08
GCNT1	72.3677430863431	1.56141	0.210827306221957	7.406128273763	1.30040056903973e-13	3.70278e-12
GCOM1	94.2506051992485	1.4541	0.304080188641175	4.78196516676005	1.7358976419915e-06	9.93396e-06
GDAP1L1	754.280833369069	-1.27387	0.18748229956683	-6.79460548890344	1.08609321775501e-11	2.00483e-10
GDF15	70.0165853878106	3.54587	0.354420264928696	10.0047171312656	1.45306354456134e-23	4.6939e-21
GDF5	18.4002264378955	1.74282	0.284412308546006	6.1277899908603	8.9108092263204e-10	1.09549e-08
GDPD1	194.293388102948	-0.581191	0.114248464631478	-5.08708278972892	3.63613132194212e-07	2.46211e-06
GDPD2	293.996152177887	1.19625	0.211922902892844	5.64473505588501	1.65435814488127e-08	1.52804e-07
GFI1	6.37832880427197	1.74575	0.206449023049832	8.45607347629952	2.76531398389259e-17	2.09332e-15
GFOD1	63.974084744566	-0.74981	0.172998611273059	-4.33419390134669	1.46295188470652e-05	6.7066e-05
GFRA1	688.888733367471	-1.31713	0.225699278541905	-5.83576408153844	5.35446147504978e-09	5.50308e-08
GGH	317.607004521039	0.904789	0.125043571145908	7.23578904619488	4.62830266794502e-13	1.1593e-11
GGT8P	8.13036962448035	3.3739	0.585950266969625	5.75799352613167	8.511961889939e-09	8.37166e-08
GHRLOS	9.71664529326547	0.584649	0.137880143245023	4.24026935125263	2.23251731065213e-05	9.80507e-05
GIMAP2	171.871343979937	1.06104	0.131122752238968	8.09192345395816	5.87298157493917e-16	3.05656e-14
GIMAP4	595.857053693024	0.777807	0.135234322560034	5.7515473601254	8.84303002515281e-09	8.65185e-08
GINS4	87.9876671440241	1.11101	0.139187285242241	7.98208802091602	1.43878365550813e-15	6.92983e-14
GJB2	105.840801780504	2.43181	0.374887828826072	6.48677394029286	8.76937619075004e-11	1.32824e-09
GJD2	4.2900163323349	-2.75646	0.47278128561384	-5.83031363456573	5.53232949610898e-09	5.67034e-08
GJD3	26.3598411073505	2.0967	0.283326774080385	7.40029895770093	1.35878240418856e-13	3.83984e-12
GK3P	14.6699976848222	0.593243	0.128710134016374	4.60914239859041	4.04333339120524e-06	2.11845e-05
GLA	254.146012628935	0.621337	0.0789609378614105	7.86891110600836	3.57741245530137e-15	1.57339e-13
GLB1L	161.011767452063	0.962587	0.100828773222641	9.54675399134842	1.33823593860846e-21	3.02087e-19
GLIPR1	563.578782699815	1.09421	0.187454783557424	5.83720691386867	5.30831576741416e-09	5.45865e-08
GLIS3	952.324459890849	0.963229	0.162358675994652	5.93272512446658	2.97947437901276e-09	3.26262e-08
GLP1R	10.2192861317404	-2.24756	0.434812411155954	-5.16903424774296	2.35306778835533e-07	1.65306e-06
GLRA3	37.0087876579807	-2.53711	0.36298512485547	-6.98955936933182	2.75750908873149e-12	5.92485e-11
GLRA4	0.894736082826609	-1.9637	0.406696173784677	-4.82841028739115	1.37627310750668e-06	8.09857e-06
GLRB	510.77103241478	-0.760587	0.132951452141314	-5.72079100870336	1.0602925413298e-08	1.02137e-07
GLRX	388.510466019545	0.61854	0.12542533341557	4.93153668849175	8.15852402421903e-07	5.09018e-06
GLS2	53.9091245256562	-1.19944	0.279780235939993	-4.28709633313217	1.81023803352901e-05	8.13348e-05
GLT25D1	1213.30016275219	0.654244	0.085653298896296	7.6382865315403	2.20131547124289e-14	7.93151e-13
GLUD1	10849.7848509756	-0.981216	0.114853274473993	-8.54320988818094	1.30543981195646e-17	1.05426e-15
GLUD2	1298.57495782957	-1.0479	0.139170012887578	-7.52966683360332	5.08699518482124e-14	1.63202e-12
GMFG	269.139798507337	0.73695	0.138418003600349	5.32409052345104	1.01459374432393e-07	7.80675e-07
GMPR	578.212365924256	1.10083	0.244423612071243	4.50379359550273	6.67510410012791e-06	3.31825e-05
GNA14	66.7206282901751	0.902854	0.195299248303382	4.62292668071991	3.78363484902343e-06	2.00029e-05
GNAL	248.12788763367	-1.15171	0.205453249710795	-5.60570417615208	2.07409955193096e-08	1.85935e-07
GNAT1	1.82315412672253	2.85753	0.583799715986386	4.89470365579216	9.84539738257417e-07	6.04006e-06
GNB3	111.412047919425	-1.22188	0.216078159908229	-5.65482518993401	1.5600496796745e-08	1.4477e-07
GNG12	1602.52549265009	1.01492	0.165613694116099	6.12823880877119	8.88571490383505e-10	1.09312e-08
GNG13	7.2465892976255	-2.14395	0.48985251282136	-4.37673319845711	1.20471289434573e-05	5.65702e-05
GNG4	1332.33461157473	-0.728342	0.154116103358744	-4.72592738809509	2.29067498214109e-06	1.27403e-05
GNG5	1209.04642582249	0.636563	0.103686825855204	6.13928602626936	8.28931961247055e-10	1.02514e-08
GNGT2	33.4338286095485	0.915929	0.16249551224885	5.63664107759075	1.73398989968421e-08	1.58866e-07
GNLY	40.1757026550873	2.782	0.295780474138506	9.40563688607636	5.17160435406564e-21	1.0308e-18
GNRHR	5.71845794263596	-0.928076	0.19839494623928	-4.67792205408721	2.89796657642127e-06	1.57609e-05
GNS	2525.96017621202	0.723058	0.100768879407378	7.17541322099214	7.20891124320284e-13	1.73561e-11
GOLGA2B	68.1298305248645	0.983132	0.190034393835792	5.17344087389276	2.29821870241736e-07	1.62427e-06
GOLGA6B	6.01746540785664	-1.03213	0.225999688234812	-4.56697329126658	4.94817030353812e-06	2.54625e-05
GOLGA6L5	42.6820242233485	-0.799487	0.151760813478544	-5.26807454780489	1.37862124165229e-07	1.02378e-06
GOLGA8A	1880.25221194294	-1.03933	0.183297861211841	-5.67018840720804	1.42640569813067e-08	1.33292e-07
GOLGA8B	755.198957487353	-0.951759	0.203853026297228	-4.66885000974809	3.02890403636273e-06	1.63779e-05
GPA33	1.78565793472847	2.53351	0.409567445672464	6.18582359180398	6.17790647272614e-10	7.87214e-09
GPAT2	37.7713585799674	1.0708	0.23393831899451	4.57727462308036	4.71072871250652e-06	2.4388e-05
GPD1	533.727013626757	1.46634	0.266205515514039	5.50830387859823	3.62307586576654e-08	3.08554e-07
GPHN	706.935532186146	-0.616875	0.0867848073551204	-7.10809958335943	1.17651661729038e-12	2.68492e-11
GPM6A	20034.5740242866	-0.672529	0.102847977777853	-6.53905663209092	6.19080815151489e-11	9.69824e-10
GPNMB	1253.60742587959	2.32032	0.270675815646206	8.57232254503579	1.01418559446092e-17	8.33411e-16
GPR1	9.60227122516178	3.97595	0.591585050865999	6.72084880435176	1.80668990175443e-11	3.1904e-10
GPR109A	2.07517280857674	1.82932	0.413688651746041	4.42196523525535	9.7807196386647e-06	4.69635e-05
GPR120	11.0727534924367	1.24449	0.208699378870916	5.9630639801963	2.47551434259596e-09	2.76408e-08
GPR123	773.200475647395	-0.767905	0.146775945679462	-5.23181534914454	1.67853380437101e-07	1.22085e-06
GPR133	69.3415005520898	0.891365	0.202425967717898	4.40341349001384	1.06560787721034e-05	5.07247e-05
GPR141	2.72414219978514	2.47297	0.415516933888459	5.95156048484807	2.65597829675305e-09	2.9393e-08
GPR153	438.838162322412	-1.11163	0.177886831618738	-6.24908606160495	4.12861390987807e-10	5.46669e-09
GPR156	13.6275569956798	1.42281	0.271996952562925	5.23097352484217	1.68619660278819e-07	1.22547e-06
GPR157	1.93690623737258	2.03961	0.417490681626755	4.88539755909919	1.03220363145413e-06	6.29537e-06
GPR158	953.383380614738	-0.719529	0.163401136013778	-4.40345373172706	1.06541014286672e-05	5.07247e-05
GPR160	58.782608605118	0.830471	0.154093865700615	5.38938471835845	7.069931378508e-08	5.65148e-07
GPR162	1654.42779323797	-0.706261	0.120714739974758	-5.85065678708784	4.8963565772701e-09	5.07963e-08
GPR171	3.84052087013372	2.81164	0.362359325655143	7.75924632705476	8.54355688721909e-15	3.47228e-13
GPR172B	5.59152247080283	2.07696	0.321486470147082	6.46048066847725	1.04370926392426e-10	1.5594e-09
GPR173	323.627507720994	-0.736138	0.113146838573548	-6.50604199851864	7.71566633406659e-11	1.18009e-09
GPR18	2.01781145580835	3.44082	0.43141880730262	7.97559226195337	1.51651819654029e-15	7.21154e-14
GPR21	6.27542390998847	-1.65605	0.296423991250764	-5.58675947208206	2.31345790903459e-08	2.05232e-07
GPR37	1252.51544052187	1.13839	0.208874263619885	5.45013628983565	5.03312344144608e-08	4.15421e-07
GPR45	19.533894073463	-1.1879	0.21104338930249	-5.62869168729951	1.81581632502489e-08	1.65714e-07
GPR55	15.400301828899	1.42661	0.253897591314174	5.61885017150657	1.922324633555e-08	1.74499e-07
GPR61	24.9731969456687	-1.44953	0.224757105660117	-6.44931231388037	1.12358809335853e-10	1.66284e-09
GPR65	95.2977311169191	1.52511	0.220783275885815	6.90772887205563	4.92474039443898e-12	9.8839e-11
GPR82	24.9070597216393	2.6203	0.318543764459404	8.22585661677331	1.9380074134289e-16	1.13117e-14
GPRC5A	36.0422745643621	1.82836	0.36175518033908	5.05413086302242	4.32355095489505e-07	2.87561e-06
GPSM1	1857.49319552458	-0.610258	0.101624921405198	-6.00499905429804	1.913330197861e-09	2.18987e-08
GPSM3	508.389314902854	0.70762	0.143052466282089	4.94657433995788	7.55308904279054e-07	4.7536e-06
GPX3	6694.5774028609	-1.32245	0.286457191877744	-4.61658848664932	3.90099730611245e-06	2.05537e-05
GPX8	77.3953096828988	2.87078	0.266424545135532	10.7752152917419	4.50726437393454e-27	4.13514e-24
GRAMD1B	244.086697729689	-0.786531	0.153280994216388	-5.13130310165957	2.87743121456327e-07	1.9898e-06
GRAP2	6.20715346670262	2.30018	0.283006041321302	8.12768647844225	4.37561176049567e-16	2.32366e-14
GRB10	823.373539981735	0.715247	0.152172931840688	4.70022732578721	2.59872040337794e-06	1.42827e-05
GREB1L	48.3074045635549	-1.38317	0.283483414417873	-4.87920149598638	1.06516200988709e-06	6.4711e-06
GRIA2	3104.98078412944	-1.27353	0.144224522058294	-8.83018249793819	1.04505069779912e-18	1.09811e-16
GRIA3	2215.1725331404	-0.892288	0.109784654845536	-8.12762205414524	4.37793723423241e-16	2.32366e-14
GRIA4	3185.48600372915	-1.10701	0.162879734357114	-6.79647572741827	1.0720935843073e-11	1.98094e-10
GRID1	901.199916083164	-0.603012	0.119580349257791	-5.04273641762744	4.58921210909623e-07	3.02972e-06
GRID2	186.97799840394	-1.11545	0.241008872028934	-4.6282678817136	3.68736849423403e-06	1.95657e-05
GRID2IP	18.7781755165473	-0.951707	0.145274251962978	-6.55110312167554	5.71136006040024e-11	9.00741e-10
GRIK1	201.249753873035	2.03268	0.316043968532638	6.43163252387849	1.26240646631429e-10	1.84066e-09
GRIK2	803.375492299742	-0.705832	0.159639991348923	-4.42139859640055	9.8064083295721e-06	4.70627e-05
GRIN1	1138.59087117255	-1.69122	0.343589008264174	-4.92221555468786	8.55698862676593e-07	5.30873e-06
GRIN3A	115.942669870335	-1.44923	0.261028866680991	-5.55198046400883	2.82451166607643e-08	2.45911e-07
GRIP2	21.0373377020559	-1.29612	0.303621057108198	-4.26887119528632	1.96464671134547e-05	8.71853e-05
GRM4	39.6901684197044	-2.27891	0.331555147043828	-6.8734109745436	6.26846354508975e-12	1.2158e-10
GRN	3639.31300208547	0.730098	0.103717527462856	7.03929062828264	1.93220979245578e-12	4.26406e-11
GSDMD	409.721145015745	1.19259	0.160291759906303	7.44012937497449	1.00586740418243e-13	2.96999e-12
GSN	10323.5202688976	0.675301	0.141437338103137	4.77455771733289	1.80102626217727e-06	1.0269e-05
GSTK1	1197.25048375999	0.788956	0.0847331039044745	9.31107729641502	1.26542250670733e-20	2.258e-18
GSX2	10.2750493652249	2.6323	0.500239424123409	5.2620756742584	1.42438113934544e-07	1.05233e-06
GUCY2D	0.960675730853646	2.52243	0.58488145311394	4.31272027777489	1.6125808664515e-05	7.30849e-05
GUSB	722.793745590708	0.723251	0.0960511709172538	7.52985472224314	5.07968078113547e-14	1.63202e-12
GVIN1	34.0455666312506	1.16102	0.201141440136587	5.77213569599507	7.82730404225648e-09	7.76349e-08
GYG2	763.980088587021	1.43443	0.236157329627548	6.07402379546224	1.24744231067348e-09	1.48867e-08
GZMA	16.8076849639499	3.10087	0.36836926355279	8.41783388022092	3.83509061407112e-17	2.78505e-15
GZMH	8.22763098216895	2.80142	0.374912621811086	7.47220142241685	7.88641655080042e-14	2.39481e-12
GZMK	14.2757177362706	3.51954	0.399158761731186	8.81738354821227	1.17165348981555e-18	1.21282e-16
H19	513.818215737411	3.43221	0.444524095049986	7.72109859988816	1.1533129078635e-14	4.53959e-13
H1FNT	3.56974392299758	-0.921796	0.212823580467955	-4.33126669954349	1.48253977396005e-05	6.78483e-05
H2AFJ	240.512303196882	0.887608	0.148041389047362	5.99567585786733	2.02640866730415e-09	2.30801e-08
HAAO	61.0007001593428	0.804575	0.170181662460849	4.72774434071612	2.27027785202595e-06	1.26482e-05
HABP2	10.4342586343565	2.02429	0.370647077414002	5.46149785145775	4.72133963461249e-08	3.92279e-07
HAMP	108.715460129948	1.67841	0.305832994910867	5.48799956897869	4.06511057218001e-08	3.43081e-07
HAPLN1	370.596976188668	-1.67046	0.281646136235627	-5.93107090955769	3.00965191666059e-09	3.28606e-08
HAVCR2	809.617571080243	0.830487	0.155763484678178	5.33171948871979	9.72871390146483e-08	7.51658e-07
HBQ1	8.1231349371156	-1.42012	0.302547740053011	-4.69386029696867	2.68097155787812e-06	1.46916e-05
HCG26	31.5489946757632	1.30458	0.218809366977719	5.96217075364371	2.48908836255745e-09	2.77427e-08
HCK	482.203906738903	0.773878	0.159152595825509	4.86248851535481	1.15919106579585e-06	6.9471e-06
HCLS1	1473.25540108229	0.838631	0.167362856930119	5.0108549683533	5.41887435305623e-07	3.51065e-06
HCN3	200.983166701601	-0.643058	0.114548358215024	-5.61385278771265	1.97870571894589e-08	1.78838e-07
HCP5	208.78725674229	1.56193	0.190323123750956	8.20673114949122	2.27291739227075e-16	1.29833e-14
HCST	147.679650817671	0.814582	0.177804285126986	4.58134307897203	4.61999202743848e-06	2.39381e-05
HDAC4	1297.62111143895	-0.90707	0.0867423977153969	-10.4570595352327	1.36011176868213e-25	7.07863e-23
HDHD3	145.580162179122	1.32111	0.197312825698599	6.69551369927545	2.14915311218674e-11	3.72838e-10
HEBP1	496.450512041996	0.713509	0.135906364581935	5.25000592402884	1.52094318969595e-07	1.11488e-06
HEBP2	287.414727841259	0.684085	0.102617152295711	6.66638223377477	2.62185885246921e-11	4.46574e-10
HECW1	161.253660818792	-1.47504	0.228888127587086	-6.44437047297414	1.16081220785403e-10	1.70983e-09
HELB	11.1088262203438	1.15473	0.231474876045936	4.98857897239069	6.08250463531342e-07	3.90147e-06
HERC1	1874.4081229864	-0.610461	0.0770290059197072	-7.92508320419331	2.27993620084153e-15	1.0469e-13
HERC5	345.139360519853	1.03224	0.178328505522343	5.78842635313244	7.10488869023338e-09	7.11096e-08
HES5	256.303659443848	-1.55551	0.301306222037577	-5.16254517095831	2.43614562597182e-07	1.70503e-06
HES6	5538.74339970121	-0.804293	0.179720330314146	-4.47524840940745	7.63225240505806e-06	3.75126e-05
HES7	14.2639701213052	-1.25299	0.258238856733173	-4.85205292354372	1.22190003909296e-06	7.28165e-06
HEXB	898.456097798709	0.825691	0.10251699839332	8.05418857086684	8.00077907533981e-16	4.02964e-14
HFE	53.6368040152477	1.76954	0.189416361065062	9.34205658226131	9.44807931005145e-21	1.77019e-18
HFM1	80.2023225253758	-0.889396	0.199070005632833	-4.46775435126807	7.9044999688953e-06	3.87794e-05
HGD	3.40503112944907	3.85005	0.531634473768308	7.24191538807284	4.42391830741915e-13	1.11257e-11
HGF	77.0119109246195	1.62011	0.280150890793798	5.78297653099484	7.33903052334959e-09	7.32184e-08
HIP1R	3562.55961291381	-0.93258	0.1450873898121	-6.42771159758411	1.29539209391497e-10	1.88289e-09
HIST1H2BK	234.624187833155	0.623076	0.119782923457961	5.20171031417922	1.97462846774087e-07	1.41695e-06
HIST1H3E	22.447694193125	1.11399	0.228381905844455	4.87775129884744	1.07302097339243e-06	6.5104e-06
HIST1H4H	35.5418381335432	1.08442	0.177480331120683	6.11006486591616	9.95906537887727e-10	1.2085e-08
HK3	41.4404805455545	1.72182	0.241860900796718	7.11905112578844	1.086725973774e-12	2.51369e-11
HLA-A	12822.3178107344	0.80983	0.13786279329973	5.87417520371206	4.24953757447709e-09	4.46047e-08
HLA-B	13348.9470003675	1.12092	0.159634575580166	7.0217840374205	2.1905294876464e-12	4.81146e-11
HLA-C	9953.95132699636	0.823891	0.15095326108088	5.45792018915043	4.81744095566167e-08	3.99555e-07
HLA-DMA	1151.16437262035	1.34275	0.174276778907656	7.70472374611843	1.31126642324899e-14	5.02731e-13
HLA-DMB	1155.91829347466	1.32393	0.172826468078795	7.66045666972558	1.85273092226055e-14	6.87382e-13
HLA-DOA	835.666773177494	1.83825	0.23718692290112	7.75020095161644	9.17472414711135e-15	3.70469e-13
HLA-DOB	21.4834856585581	2.04568	0.269058695916314	7.60309589843853	2.89129070138394e-14	1.00132e-12
HLA-DPA1	4648.31600268295	1.86302	0.221546686999881	8.40915033338467	4.12991498542242e-17	2.95336e-15
HLA-DPB1	2724.73184722608	1.7397	0.223428569370267	7.78639821124524	6.89464170637643e-15	2.87062e-13
HLA-DPB2	5.50248017987287	3.44052	0.413119689069536	8.32813215742581	8.2127803952621e-17	5.32438e-15
HLA-DQA1	794.564812376005	2.19262	0.29136027969742	7.52545653722258	5.253642824867e-14	1.67973e-12
HLA-DQA2	211.583171440045	2.47589	0.340835720816737	7.26417703318351	3.75316204879334e-13	9.60645e-12
HLA-DQB1	969.666032073192	1.70282	0.267839222088475	6.35762533307976	2.04896478763252e-10	2.85635e-09
HLA-DQB2	41.6799491186978	2.56997	0.387260157715972	6.63628095824252	3.21696398577319e-11	5.35285e-10
HLA-DRA	9738.25844543123	1.88786	0.218266897333606	8.64934123447666	5.17975633265832e-18	4.71106e-16
HLA-DRB1	3045.7029289157	1.78704	0.230592396064502	7.74977221923402	9.20575298683151e-15	3.70692e-13
HLA-DRB5	1097.11820370475	1.70473	0.261469362932509	6.51980236607307	7.04000884039066e-11	1.0919e-09
HLA-DRB6	276.9623731128	1.8905	0.282696771334984	6.68738999916651	2.27185857142176e-11	3.92309e-10
HLA-E	6416.67694255184	0.798836	0.127409690266647	6.26982508956036	3.61453899990744e-10	4.82007e-09
HLA-F	624.881504749136	1.01389	0.167333462835168	6.05909219642282	1.36891917258275e-09	1.62227e-08
HLA-G	54.9670676359021	0.987089	0.229927692237925	4.29303925991002	1.76243827388773e-05	7.93966e-05
HLA-H	1265.69404996744	0.812697	0.160434271265262	5.06560821447614	4.07098432133337e-07	2.71534e-06
HLF	828.218046312385	-0.755613	0.142356909996625	-5.30787542747878	1.10910397384911e-07	8.44722e-07
HMGB2	1414.91818757393	0.600153	0.124797374184427	4.80902273910662	1.51669954510092e-06	8.8075e-06
HMGN5	429.610382134595	-0.595361	0.138146732209221	-4.30962580501788	1.63531010576428e-05	7.40434e-05
HMMR	66.9989577108092	1.16459	0.251835545784644	4.6243989335634	3.75686206251284e-06	1.98782e-05
HMOX1	1098.49389000426	0.995845	0.154594850031658	6.44164395265371	1.18186277161822e-10	1.73674e-09
HMP19	2508.68075662095	-1.59537	0.240661859542891	-6.62907996602801	3.37785566284284e-11	5.58091e-10
HMSD	8.80562847961067	1.75193	0.329865484946553	5.31104545507041	1.08998137375991e-07	8.32188e-07
HN1L	787.029042528394	0.660746	0.100825812691983	6.55334239017797	5.6263311636465e-11	8.91081e-10
HNF4G	54.7776132435325	1.08276	0.192843693264273	5.61469416522797	1.96910207959077e-08	1.78228e-07
HOPX	2075.23706899222	1.01441	0.235662625548505	4.30448529196116	1.67374410936881e-05	7.57105e-05
HORMAD2	2.30063277667852	2.46708	0.495028004284148	4.98371439321843	6.23751293556543e-07	3.98996e-06
HOTAIR	9.61467769614542	4.40985	0.987406409423518	4.4660977053408	7.96592407306341e-06	3.90399e-05
HOXA1	14.5666791634151	2.50394	0.365078288710912	6.85863846637859	6.95199279646059e-12	1.33181e-10
HOXA9	16.2868330396378	3.09848	0.626315118612411	4.94715089293887	7.53075992163393e-07	4.74592e-06
HOXB2	42.5289679441857	1.90978	0.380579735532947	5.01809242862611	5.21870693389509e-07	3.388e-06
HOXB4	31.1963402336184	2.27302	0.496652667452322	4.57668389805201	4.72404443240648e-06	2.44502e-05
HOXC13	4.55541915181913	4.47932	0.865423966928967	5.17586457442653	2.26857971259875e-07	1.60635e-06
HP	88.2332358553881	1.67678	0.30244626738454	5.54407227068124	2.95516768477576e-08	2.55978e-07
HPD	23.9004899088647	2.41742	0.406179927895202	5.95160259930395	2.65529481216133e-09	2.9393e-08
HPS1	543.175675977958	0.665653	0.135806752307873	4.90147174138416	9.51213340653743e-07	5.86592e-06
HRASLS2	1.30023085266163	2.69859	0.490654118543052	5.49999110558601	3.79810407927251e-08	3.22434e-07
HRASLS5	80.083484526256	1.7841	0.260264861215241	6.8549489333188	7.13379982644015e-12	1.36066e-10
HRH1	508.446694981962	0.930773	0.192269183147283	4.84099052767452	1.29193531465562e-06	7.66003e-06
HRH3	118.468272198581	-1.61958	0.307963259604126	-5.25900854639885	1.44834159233651e-07	1.06793e-06
HRNBP3	237.452645853552	-1.58428	0.338127342999999	-4.68546817592482	2.7932069944605e-06	1.52354e-05
HS2ST1	1560.5636943128	0.608179	0.0886752873677103	6.8584943838755	6.95900669645651e-12	1.33181e-10
HS3ST3B1	11.4244438090706	2.83618	0.470210949288329	6.03172148164614	1.62222194479685e-09	1.89607e-08
HSBP1L1	40.7872728668737	0.744805	0.165508166437383	4.50010825546269	6.79188643768019e-06	3.36859e-05
HSD17B7P2	61.5959853115799	-0.664662	0.155447278692271	-4.27580484181168	1.90448004591469e-05	8.48973e-05
HSD3B7	234.476835836455	1.04721	0.141154505806357	7.41886888899921	1.18124773197217e-13	3.4049e-12
HSF2BP	58.1832081314327	-0.833172	0.151781829898224	-5.48927649249328	4.03583447654293e-08	3.41071e-07
HSF4	170.451834881884	-1.04083	0.210033197850294	-4.95553914153002	7.21299996334511e-07	4.56872e-06
HSFX2	42.2075388381029	-0.643812	0.095547936536263	-6.73810968657343	1.6046042328741e-11	2.85236e-10
HSH2D	6.49287306193664	1.7714	0.268751754975073	6.59122417789206	4.36214625763856e-11	7.05002e-10
HSN2	15.0357614691329	-1.1599	0.221463528465464	-5.23740918800691	1.62846382033831e-07	1.18766e-06
HSPA12A	900.012489052421	-0.807447	0.162639764073255	-4.96463212539315	6.88314139696605e-07	4.37755e-06
HSPA6	186.679449389868	1.68971	0.249574524156825	6.77035232930615	1.28469151418894e-11	2.33236e-10
HSPA7	74.2632775708359	2.52985	0.261205557285252	9.68526724744658	3.48296417901029e-22	8.93929e-20
HSPB1	3354.26944932977	1.2036	0.195278187727528	6.16350516439239	7.11520569749114e-10	8.93502e-09
HSPB6	1002.0919297538	1.05225	0.23746501283846	4.43117793448669	9.3719712224308e-06	4.51049e-05
HSPB7	62.9599610053308	1.46123	0.240049084486132	6.0872056001875	1.14898384250135e-09	1.37731e-08
HSPG2	1017.00765294687	1.14458	0.201693036230439	5.67485693666307	1.38804608737442e-08	1.29967e-07
HTATIP2	196.342297928089	1.17416	0.150851147510022	7.78354444581487	7.05203619200212e-15	2.91671e-13
HTR2A	60.9777808431154	-1.28201	0.265601631739694	-4.82682483039512	1.38727039428033e-06	8.15816e-06
HTR5A	26.0918132381968	-1.7886	0.395300858005931	-4.5246549589958	6.04941164760907e-06	3.046e-05
HTRA3	54.7248460895639	1.61918	0.298157310407887	5.43062873742725	5.61558520103661e-08	4.57053e-07
HTRA4	1.96343029784121	3.44461	0.654801925613482	5.26053565668783	1.43636345788302e-07	1.06035e-06
HVCN1	437.766953120092	0.976813	0.183144463914711	5.33356371271528	9.63037510247577e-08	7.44982e-07
IBSP	33.8961305055675	3.56919	0.730164566708364	4.88819348956051	1.01765486277804e-06	6.22081e-06
ICAM1	499.9355250166	1.33619	0.197900651886453	6.75179770995833	1.46024381872416e-11	2.6181e-10
ICAM4	3.35670457340623	1.44142	0.276891243778025	5.20572487988262	1.93240768553819e-07	1.38932e-06
ICOS	2.78211561668802	4.02353	0.526492816339296	7.64213274328092	2.13652734422053e-14	7.74274e-13
ICOSLG	371.882745662129	0.910952	0.163729965970475	5.56374736855212	2.64042124441049e-08	2.31625e-07
IDO1	7.93774849250307	4.54452	0.553856816121388	8.20522277210151	2.30163705441253e-16	1.31074e-14
IFI27	723.323752381051	0.941955	0.185023137327789	5.09101057683276	3.56160156852771e-07	2.41776e-06
IFI30	955.662218949837	1.73911	0.201575928947457	8.6275727370844	6.26676821031524e-18	5.56253e-16
IFI35	508.412113442983	0.996037	0.164907458435925	6.03997613323558	1.54137025113174e-09	1.81174e-08
IFI44	469.482942325734	0.990598	0.17675501783015	5.60435535018349	2.09031471725122e-08	1.87209e-07
IFI6	3241.94736618509	1.21055	0.257511225169346	4.70097142739664	2.58926747324209e-06	1.42391e-05
IFIH1	355.399218900544	1.17702	0.159917741367706	7.36014280130723	1.83713591973448e-13	5.05442e-12
IFITM2	770.3378244349	0.761206	0.151328163306569	5.03016479276904	4.90058452559293e-07	3.20927e-06
IFITM3	3268.22926611564	1.14581	0.180315710950384	6.35445920125342	2.09161149123153e-10	2.90715e-09
IFNGR2	1109.34776899836	0.619649	0.0890379470400084	6.95938606678429	3.41758775267897e-12	7.10676e-11
IGF2	1113.1740290743	2.07277	0.26943971263304	7.69287594960183	1.43863984405599e-14	5.43435e-13
IGF2AS	6.69429405478106	2.87572	0.513596672611717	5.59918608718528	2.15360524947274e-08	1.926e-07
IGF2BP3	139.097426478203	1.70159	0.319728681429774	5.32197053932798	1.02649199036302e-07	7.89182e-07
IGFALS	19.853296503296	-0.946799	0.208781505825861	-4.53487739215972	5.76369572993428e-06	2.91546e-05
IGFBP2	1733.64398768428	1.79467	0.31463419043987	5.70398075485748	1.17041297452997e-08	1.11427e-07
IGFBP5	9105.25973685501	0.990098	0.180626205730335	5.48147438105597	4.21795810330014e-08	3.54067e-07
IGFBP6	146.878007938182	1.50024	0.27756292585695	5.40504960119466	6.47904609272496e-08	5.21889e-07
IGFBP7	6348.58414740176	1.01198	0.14664527760541	6.90086661475848	5.1686247368691e-12	1.02367e-10
IGFN1	348.046602684518	-2.3584	0.389839021005385	-6.04968654088912	1.45127932704757e-09	1.71229e-08
IGJ	28.4651481927328	3.03338	0.452466060449371	6.7041144441072	2.02631412550354e-11	3.54482e-10
IGSF21	806.172136312904	-0.78083	0.16624691504205	-4.6968060192863	2.64261198413726e-06	1.44941e-05
IGSF6	151.979737545298	0.997811	0.163474708764572	6.10376291713533	1.0359992597866e-09	1.25229e-08
IKBIP	187.180593624233	0.927406	0.116355689510139	7.97044330569618	1.5810618565062e-15	7.44291e-14
IKBKE	135.787244306585	0.863266	0.150726552084754	5.72736812677297	1.02000670858952e-08	9.85095e-08
IKZF1	337.047599254964	0.75561	0.158764172541913	4.75932228694063	1.94244064524919e-06	1.09917e-05
IKZF3	2.99967291433698	4.07224	0.52749037968899	7.72002863953144	1.16303570200092e-14	4.56827e-13
IL13RA1	1660.62837339967	0.806154	0.13068517082298	6.16867079197928	6.88664384505861e-10	8.66542e-09
IL13RA2	154.831967098586	3.02339	0.464469410484576	6.50934254763044	7.54804240869521e-11	1.15823e-09
IL15	15.7688651013056	2.12666	0.256029479995828	8.30629909957264	9.87331728664305e-17	6.23794e-15
IL16	286.363440079755	0.661746	0.150031232977059	4.41072468018745	1.03025243767626e-05	4.92293e-05
IL17RC	392.201334551915	0.755099	0.175370821061806	4.3057269772057	1.66438233025397e-05	7.53052e-05
IL18	286.272180239978	1.00577	0.169178706349569	5.9450392482132	2.76390623667609e-09	3.04615e-08
IL18BP	431.762170005894	0.671496	0.126346111023851	5.31473566350033	1.06812266000601e-07	8.17164e-07
IL1R1	333.46104253792	1.54491	0.265378448867417	5.82154428806194	5.83063501456493e-09	5.94357e-08
IL1RAP	551.87250554151	1.07496	0.22672457820193	4.74125264064898	2.12400871199948e-06	1.19255e-05
IL1RAPL1	21.5847251247925	-0.922461	0.207274377334573	-4.4504344392498	8.56967527809141e-06	4.16718e-05
IL20RA	62.8173124248477	1.54887	0.354025522972161	4.37501457972037	1.21424362236742e-05	5.68894e-05
IL21R	53.6546970525323	1.65142	0.357409200571837	4.62053318729947	3.82755109216214e-06	2.02065e-05
IL2RA	6.95987592979084	3.81747	0.578727801281725	6.59630791040771	4.21523028210537e-11	6.83188e-10
IL2RB	34.5739866121409	2.70346	0.288158532657491	9.38183747443938	6.48328615412965e-21	1.26739e-18
IL2RG	59.653454114252	2.04909	0.209719668061037	9.77063644631794	1.50503613221739e-22	4.08672e-20
IL32	253.783322885772	1.27647	0.215248840984571	5.93018605847521	3.02591605488184e-09	3.3019e-08
IL4I1	62.0728916552571	1.06134	0.178678303823252	5.93996614952896	2.85080935606914e-09	3.13271e-08
IL7	12.6987918770293	1.37652	0.232040696782015	5.9322423345794	2.98825124574463e-09	3.27032e-08
IL7R	12.8605435353345	3.06983	0.407565729502329	7.53210719309974	4.99279430388813e-14	1.6073e-12
IMP5	2.03295600574499	-1.63208	0.279947681894105	-5.82993814268863	5.54479259636703e-09	5.67246e-08
IMPA2	77.6626915478144	0.734265	0.131897277792388	5.56694936050995	2.59237691618737e-08	2.27711e-07
IMPDH2	2950.85903339233	-0.595058	0.100821872986131	-5.90206992735823	3.58968943629913e-09	3.84542e-08
INA	933.270855221013	-1.41363	0.277848517876085	-5.08778673447338	3.62266417487634e-07	2.45388e-06
INHBC	8.86036278424752	-1.06952	0.240742949070351	-4.44257976353354	8.88866655123128e-06	4.3022e-05
INMT	69.9171924904934	2.03585	0.290825847089415	7.00023420097891	2.55534987225374e-12	5.54774e-11
INPP5D	1190.1088167792	0.726373	0.132514117434587	5.48147494771421	4.21794459089391e-08	3.54067e-07
INSRR	8.16680679119637	1.76205	0.407916367291006	4.31963090158784	1.56290380719829e-05	7.10742e-05
IQCD	63.7015820524793	0.768193	0.149708314966821	5.13126155593387	2.87806649705957e-07	1.9898e-06
IQCG	469.304063340677	1.38339	0.145355347248848	9.51728349389433	1.77765089283184e-21	3.90302e-19
IQCH	37.6026422421383	1.02887	0.151950849151893	6.77108404027461	1.2782099387319e-11	2.3251e-10
IQGAP1	1984.73088583237	1.05601	0.127008040327826	8.31453937561367	9.21093180882698e-17	5.88997e-15
IQGAP2	379.674936414413	1.52217	0.237362260452279	6.41286974960621	1.42805525476838e-10	2.05974e-09
IQSEC3	214.716748609633	-1.30868	0.305370025414761	-4.28554225025441	1.82293997568961e-05	8.17291e-05
IQUB	25.8014657137049	1.68984	0.217041393675434	7.78580221825029	6.92722440017177e-15	2.87779e-13
IRF1	394.766853515204	0.904926	0.168764721819949	5.36205597369715	8.22800337446013e-08	6.45621e-07
IRF5	358.478266908953	0.659277	0.144328633527387	4.56788950613523	4.92659604779631e-06	2.53654e-05
IRF7	314.188546804683	0.905949	0.192630546418101	4.70303683409735	2.56320155383906e-06	1.41044e-05
ISG15	1236.18597833356	1.47173	0.275148845702628	5.3488375174251	8.85209677630627e-08	6.90191e-07
ISG20	82.657295768219	1.1177	0.239525040590205	4.66631610304866	3.06647837122189e-06	1.65629e-05
ITGA2	277.882097927431	1.55028	0.210685193707466	7.3582756003077	1.86301107017425e-13	5.1106e-12
ITGA3	1170.03396470812	1.41681	0.229088996780221	6.18453519754802	6.22857154493735e-10	7.92251e-09
ITGA4	100.999905013144	1.50261	0.228033703531133	6.58941414349328	4.4156548899626e-11	7.11977e-10
ITGA5	603.613033317728	1.16049	0.174618092121819	6.64587076449958	3.01429658419083e-11	5.06056e-10
ITGA7	2041.48559329573	0.975358	0.19979981885633	4.88167632855269	1.05187806992159e-06	6.39662e-06
ITGAD	1.78566382498244	2.26487	0.524054187038721	4.32182293118518	1.54745356038521e-05	7.044e-05
ITGAL	276.353830832921	1.04235	0.199016892557977	5.2374721517642	1.62790854105686e-07	1.18766e-06
ITGB1	3087.23537850139	0.704292	0.112273490319793	6.27300395044301	3.54147917717385e-10	4.72938e-09
ITGB2	2468.59078011702	1.01614	0.165600305055359	6.13607983974392	8.45826603254883e-10	1.04259e-08
ITGB3	69.967517541467	1.26131	0.2638365730775	4.78064513312774	1.74733561218259e-06	9.99636e-06
ITGB4	3224.71346072318	1.04951	0.187191660759137	5.6066004526553	2.06339239695443e-08	1.85241e-07
ITGB7	41.4876036095405	1.33313	0.211034275485967	6.31711045784396	2.66499108744494e-10	3.63931e-09
ITGB8	4792.59077587615	0.823468	0.147499444033162	5.58285390523762	2.36603490238923e-08	2.08907e-07
ITK	23.0767323222422	2.02398	0.369872763574065	5.47209328709994	4.44750595459983e-08	3.71505e-07
ITPR3	194.763091339648	0.816334	0.181330277022511	4.50192021247091	6.7342263764594e-06	3.34586e-05
IZUMO1	1.56264955316913	-2.05043	0.419123437439187	-4.89218814024873	9.97210494076031e-07	6.1058e-06
JAK3	177.727290843699	1.31066	0.232250456868807	5.64331038767159	1.66811221395082e-08	1.53808e-07
JARID2	745.201940883381	-0.580358	0.0809626660777942	-7.1682115872899	7.59838059091289e-13	1.81586e-11
JPH3	993.380087501928	-1.39071	0.224492674728026	-6.19491538707141	5.83163492294355e-10	7.48367e-09
JPH4	1936.13945499329	-1.27104	0.161583371445123	-7.86615507751979	3.65707157529549e-15	1.60091e-13
JUB	162.855134003667	0.729342	0.132936321086136	5.48640133406676	4.10204366347023e-08	3.45496e-07
KATNAL2	91.7071304078529	0.875889	0.158704676299411	5.51898732027064	3.40958792618915e-08	2.92233e-07
KBTBD12	56.6807235729609	0.929646	0.199544992484146	4.6588282555339	3.18014380785795e-06	1.71364e-05
KCNAB1	247.215633309127	-1.0259	0.202391695981236	-5.06888759502992	4.00147441769063e-07	2.67279e-06
KCNB1	250.909802578537	-1.24111	0.193679033209571	-6.40806786277154	1.47375313311913e-10	2.11913e-09
KCNC1	350.625088368614	-0.885164	0.178541798894338	-4.9577405720854	7.1317705736397e-07	4.52339e-06
KCNC2	136.06034271765	-1.72009	0.381865462384021	-4.50443171874419	6.6550791245641e-06	3.31269e-05
KCND2	1574.30744907246	-1.12831	0.179695989278664	-6.27899195564376	3.40775221700153e-10	4.57361e-09
KCNE1	4.10339079112078	2.39941	0.377458580180352	6.35675381582142	2.06061834597741e-10	2.86833e-09
KCNE3	104.074263778231	1.07366	0.144706242767421	7.41958072373532	1.17491673244491e-13	3.39187e-12
KCNE4	182.695841183243	1.25188	0.236376666356321	5.29611293437365	1.18293694203712e-07	8.9333e-07
KCNIP2	584.861803622322	-1.87157	0.206774558932293	-9.05125480759141	1.4133471815975e-19	1.86482e-17
KCNIP3	1480.02363716062	-1.12691	0.158214255900703	-7.1227078484125	1.05826987770179e-12	2.45697e-11
KCNJ11	280.086557123323	-1.43277	0.211385440987702	-6.77801924706983	1.21834622593513e-11	2.22485e-10
KCNJ12	48.2036972501422	-1.36534	0.215418490963609	-6.33806882349243	2.32662902950319e-10	3.20763e-09
KCNJ13	3.9541723607894	1.89721	0.441644677589936	4.29578480342009	1.74076388566854e-05	7.85146e-05
KCNJ2	159.97796495759	1.03774	0.167350802503042	6.20097867399863	5.61131179280153e-10	7.22567e-09
KCNJ5	100.592561780709	1.02377	0.200834203844488	5.09758307914195	3.44017450868475e-07	2.34297e-06
KCNJ9	446.33940684376	-0.863479	0.169769564977302	-5.0861850192933	3.65337666279318e-07	2.47022e-06
KCNK13	74.9492440032708	0.801154	0.165266606474945	4.84764517431629	1.24935601147627e-06	7.43109e-06
KCNK3	188.335411675256	-1.13231	0.255500880286361	-4.4317193705489	9.3484636980065e-06	4.50033e-05
KCNK4	64.5110008995619	-1.5088	0.220106847583608	-6.85484855933668	7.13881044375414e-12	1.36066e-10
KCNK5	13.3593363601603	2.90851	0.408990711781287	7.11143811444338	1.14839953937729e-12	2.64655e-11
KCNMB1	129.413157404575	1.52944	0.192581155852265	7.94177082086712	1.99314957703653e-15	9.24348e-14
KCNN1	263.83685181733	-0.789574	0.184193984222385	-4.28664365513608	1.81392916430961e-05	8.14494e-05
KCNN4	40.4738937229731	1.54328	0.281510226464231	5.48213825723115	4.20215620569494e-08	3.53215e-07
KCNQ2	1222.81528060762	-0.705703	0.150052693153211	-4.7030314268393	2.56326946472362e-06	1.41044e-05
KCNQ5	404.320613656638	-1.04695	0.215640844128885	-4.85507262961821	1.20342627694894e-06	7.18857e-06
KCNT1	101.532597064332	-1.80624	0.335922105880818	-5.37694870532337	7.57587451855758e-08	6.00176e-07
KCTD14	42.3425853001971	0.951257	0.200873994459291	4.73558920980827	2.18419600841345e-06	1.22451e-05
KCTD16	59.3463017305898	-1.03187	0.196180051900705	-5.25982990275837	1.44188719568777e-07	1.06359e-06
KDELC2	467.495262442662	1.2597	0.143009854108492	8.80845263512602	1.26885158326653e-18	1.30622e-16
KDELR2	2514.91235372428	0.613299	0.0770880249454451	7.95582904395944	1.77935954728046e-15	8.29305e-14
KDELR3	36.0645099470022	2.01377	0.198855389342376	10.1267884219516	4.20225220656334e-24	1.43152e-21
KDM4B	1720.1930255803	-0.594279	0.0815333295238385	-7.28878528082205	3.12762044418539e-13	8.16143e-12
KDM6B	943.512690727219	-0.605696	0.098496907691306	-6.14938970842826	7.77816510158537e-10	9.67674e-09
KHNYN	518.296503886043	1.02617	0.139760692651529	7.3423643662031	2.0985314929358e-13	5.65728e-12
KIAA0087	19.7271764593278	-1.74087	0.243672551853962	-7.1442856329241	9.0465114447475e-13	2.1322e-11
KIAA0101	93.8890269285635	1.16028	0.266587691277188	4.35235480298991	1.34683067415111e-05	6.22913e-05
KIAA0182	1495.36370845727	-0.673891	0.117707054789571	-5.7251503296172	1.03342190283198e-08	9.97023e-08
KIAA0284	806.079229346791	-0.733346	0.152322016215386	-4.81444321271989	1.47610870598354e-06	8.60765e-06
KIAA0427	2004.21204521502	-0.694073	0.0691609727683136	-10.035615431369	1.06294458795867e-23	3.49392e-21
KIAA0495	383.752326665739	1.31613	0.19097156880176	6.89176079605609	5.51059810966856e-12	1.08112e-10
KIAA0513	1848.12058879609	-0.755	0.157259126705925	-4.80099418846332	1.57879851354615e-06	9.13256e-06
KIAA0895	188.983893974731	0.804173	0.1305176343224	6.1614091861082	7.21004155040102e-10	9.04805e-09
KIAA0895L	1011.38337229853	-0.744796	0.127567863465891	-5.83842637758876	5.26961590178733e-09	5.43188e-08
KIAA1107	288.71212186277	-0.64007	0.147821302076056	-4.33002875868354	1.49089869846985e-05	6.8197e-05
KIAA1244	495.738024594728	-0.938312	0.208660823978	-4.49683063634861	6.89738859664568e-06	3.41425e-05
KIAA1257	9.91671635603977	2.20104	0.295581268871254	7.44646997040431	9.58708461397319e-14	2.85117e-12
KIAA1409	442.820592426707	-1.36001	0.191921975856672	-7.0862551680708	1.37789649957421e-12	3.11415e-11
KIAA1467	850.705492279887	-0.599147	0.106092917059201	-5.64738092524407	1.62910596021952e-08	1.50656e-07
KIAA1543	243.01762292982	-1.4422	0.210679931664421	-6.84543198800496	7.62454368756764e-12	1.44151e-10
KIAA1644	441.401089549097	-1.49546	0.28652302653107	-5.21935053751565	1.79551645656975e-07	1.29687e-06
KIAA1984	15.1428039966583	-0.907513	0.171251388536191	-5.29930174739425	1.16246381838568e-07	8.79641e-07
KIF13A	1373.90552451266	-0.581852	0.111782664081873	-5.20521027453795	1.9377705768015e-07	1.39264e-06
KIF16B	235.61499226039	0.735767	0.122871218617365	5.9881135328971	2.12288862646849e-09	2.40474e-08
KIF18A	43.6917847154131	1.30365	0.244641543428783	5.32881219750328	9.88571516609582e-08	7.62845e-07
KIF1A	13707.4456395989	-0.628112	0.120594170579505	-5.20847570356022	1.9039827664321e-07	1.36993e-06
KIF20A	108.560307430097	1.32248	0.30061161332136	4.39930508417283	1.08598067004485e-05	5.15634e-05
KIF21B	2376.32074639943	-0.985945	0.138712452271204	-7.10783095648617	1.17880813149197e-12	2.68688e-11
KIF23	114.402131429157	1.19467	0.272476481511833	4.3844890960479	1.1625830566071e-05	5.47566e-05
KIF24	93.0090512847041	0.880511	0.141808857324842	6.20913815945624	5.32759692644837e-10	6.88399e-09
KIF3A	1344.45180628058	-0.593418	0.0859553908332928	-6.90379507440172	5.06313249098156e-12	1.00811e-10
KIF3C	2616.56495631958	-0.80805	0.112742887522822	-7.1671931087687	7.6551018129115e-13	1.82476e-11
KIF4A	195.324696225126	1.05948	0.249996296074924	4.23799981588878	2.25519954228703e-05	9.89541e-05
KIF9	158.655866940807	1.00561	0.144441097774146	6.96207498992196	3.35296929404034e-12	6.9879e-11
KLF12	1149.74285428762	-0.609031	0.108433042411559	-5.61665438250454	1.946903000013e-08	1.76474e-07
KLF15	1378.02649442404	-0.679712	0.157248968518829	-4.32251991235372	1.54257156179032e-05	7.02348e-05
KLHDC7B	16.0200247573967	1.67225	0.259487639948053	6.44442142731255	1.16042231580364e-10	1.70983e-09
KLHDC8A	965.23327390062	1.3415	0.215413202261285	6.22755635998254	4.73766335226706e-10	6.19866e-09
KLHDC9	134.823095909513	0.882225	0.196721741600464	4.48463636954021	7.30383828995087e-06	3.60023e-05
KLHL23	310.340462783618	-0.846019	0.150799687016894	-5.61021946986224	2.02070185639374e-08	1.82106e-07
KLHL25	1192.92150637157	-1.0377	0.112407011508901	-9.23165142079142	2.66491058731545e-20	4.3798e-18
KLHL26	275.47509612497	1.08229	0.201253813411526	5.37773640136312	7.54281397132006e-08	5.98569e-07
KLHL28	517.309268194326	-0.623015	0.0909958242896475	-6.84662907235973	7.56104276795777e-12	1.43239e-10
KLHL4	408.36966946402	1.06807	0.209810066458643	5.09064569697357	3.56846255851476e-07	2.42066e-06
KLRB1	6.77495844710603	3.20029	0.431924575030642	7.40937884603083	1.26892337653229e-13	3.62417e-12
KLRC3	249.985589986944	-1.18944	0.246025046735912	-4.83461859650984	1.33401155444278e-06	7.88207e-06
KLRD1	5.20289496820682	1.95883	0.28889819204337	6.78033073688272	1.19901077687151e-11	2.19382e-10
KLRF1	2.660785345345	1.3546	0.288225369937859	4.69978220947318	2.60439090350927e-06	1.43096e-05
KMO	16.54521136607	2.33397	0.289229461417362	8.06961397328652	7.05207767463381e-16	3.59043e-14
KPNA5	135.076016651181	-0.601716	0.139906798538901	-4.30083335675626	1.70156987557945e-05	7.68578e-05
KRT7	10.0921847370481	2.31607	0.446300258054261	5.18949298661132	2.10867445635422e-07	1.50393e-06
KRT80	4.82763571004137	2.28509	0.486273463672575	4.69918551618027	2.61201103164148e-06	1.43473e-05
KRT86	3.63654192777172	2.28413	0.380122330971944	6.00893958784669	1.86740687536205e-09	2.14272e-08
KSR2	263.888181662493	-1.50811	0.271948182838702	-5.54558173402891	2.92978434204373e-08	2.54249e-07
KYNU	38.1759439164137	1.6533	0.217694021420488	7.59462709765365	3.08680047907543e-14	1.06313e-12
LACTB2	163.488849365428	0.722681	0.114458655525307	6.31390767954025	2.72076283650494e-10	3.70561e-09
LAIR1	646.06552419793	1.02816	0.163211430278066	6.29954632774155	2.98518071278021e-10	4.0304e-09
LAMA2	527.810351780477	1.30234	0.215947983855602	6.030802736654	1.63147235349992e-09	1.90569e-08
LAMB1	768.989680495903	1.28289	0.222815280194528	5.75763856784052	8.52987435515949e-09	8.38488e-08
LAMB2	4034.07910001676	0.582366	0.102709849768075	5.67000765359725	1.42791140603371e-08	1.33367e-07
LAMB2L	103.193360628362	-0.933708	0.13382637980374	-6.97700732272516	3.01533997679673e-12	6.3621e-11
LAMB4	5.218127590544	1.27096	0.281098502548703	4.52141885308231	6.14265073230227e-06	3.08797e-05
LAMC1	1488.46358524737	1.12764	0.169757339117864	6.64264985869402	3.08093148007266e-11	5.15396e-10
LAMC3	264.006507514637	0.978917	0.200861604120701	4.87358752807128	1.09589679758721e-06	6.6256e-06
LAMP3	22.196322105125	2.46654	0.269697118301909	9.14557442342671	5.93137919905339e-20	8.61475e-18
LANCL2	2319.79148281592	0.932544	0.205151764917145	4.54562946151344	5.4771318934086e-06	2.78555e-05
LAP3	2399.81028966894	0.83905	0.105127587227929	7.98125223954153	1.44856101659022e-15	6.94124e-14
LAPTM5	6113.47760905538	0.852077	0.149376480088531	5.70422227943987	1.16875479822276e-08	1.11326e-07
LARGE	803.624882330262	-0.654698	0.0922443533703872	-7.09743311024115	1.27095284322913e-12	2.88988e-11
LASS1	2631.65463056532	0.782316	0.134114404300583	5.83319592784593	5.4375654334459e-09	5.57626e-08
LASS2	2626.23790862451	0.687075	0.0769358823859504	8.93048386783689	4.24149516745677e-19	4.96679e-17
LAT2	570.649689525073	0.782337	0.146533620853197	5.33895959198017	9.34814743545705e-08	7.25847e-07
LATS2	179.160936499383	1.14395	0.162146946668021	7.05502167189493	1.72573824325545e-12	3.82644e-11
LAX1	6.23662195815743	1.65509	0.27687248230636	5.97779618016044	2.26176464899545e-09	2.5436e-08
LAYN	175.065743120339	0.645737	0.145122196893029	4.44960645726057	8.60277797876834e-06	4.18219e-05
LBP	1.14117261353795	3.12395	0.728968902935486	4.28543975985709	1.82378063514701e-05	8.17411e-05
LBXCOR1	25.1217946302545	-0.821939	0.142812356653425	-5.75538019510872	8.64470124724591e-09	8.47942e-08
LCA5L	48.0917389068219	1.14309	0.169401955740648	6.74782278692541	1.50080089186909e-11	2.68055e-10
LCK	18.6844283661942	3.15425	0.305637062356702	10.3202596988201	5.70685875453146e-25	2.42621e-22
LCNL1	114.457611549636	-1.55653	0.301782256964983	-5.15778616823663	2.49886759359632e-07	1.74567e-06
LCP1	991.853838184298	0.689949	0.162133008807339	4.25545241909581	2.08626729121196e-05	9.20591e-05
LCP2	377.414188966786	0.78983	0.157279029816566	5.02183917988953	5.11790281163751e-07	3.33411e-06
LCTL	32.9651944165693	2.8089	0.306251757665396	9.17186130384798	4.64920934577571e-20	7.02481e-18
LDHA	3513.84375346979	0.587301	0.129069346658927	4.55027445235064	5.35759885569892e-06	2.73292e-05
LDLRAD2	31.6836450988241	2.00436	0.262138194253355	7.64620450783725	2.06998362966398e-14	7.54537e-13
LECT1	33.8623163132501	1.91697	0.423933967450708	4.52185304039945	6.13006146928791e-06	3.0833e-05
LEF1	299.132830608719	0.655092	0.148161671931398	4.42146518960748	9.8033859740192e-06	4.70603e-05
LEPREL1	250.567645171394	1.44335	0.200080781019958	7.21383685368306	5.43969245943089e-13	1.34457e-11
LGALS1	2502.78295896871	1.31235	0.184958797703037	7.09534135207628	1.29032598833441e-12	2.93037e-11
LGALS12	1.84853868361044	2.43259	0.411452026431083	5.91221413336837	3.37539326616468e-09	3.64084e-08
LGALS3	905.117094224314	1.99751	0.23682826204057	8.43442553967743	3.32833585539936e-17	2.44548e-15
LGALS3BP	5709.06082994262	1.03205	0.127496347510619	8.09474113952125	5.73862551149049e-16	2.99496e-14
LGALS8	272.169518722371	0.635514	0.105426022601296	6.02805813321989	1.65941367057143e-09	1.93471e-08
LGALS9	1265.3512509434	0.745013	0.160512530879668	4.64146536232373	3.4594701915451e-06	1.84873e-05
LGI4	748.540629631149	1.34152	0.254127814988468	5.27890153253475	1.29960615613966e-07	9.72421e-07
LGR6	276.309980066264	2.30556	0.484077461223891	4.76278815920946	1.90936256054396e-06	1.08209e-05
LHFP	1656.86131914267	0.775771	0.124312638779343	6.24048253291795	4.36223107689905e-10	5.72745e-09
LHFPL2	1249.65556712045	0.806526	0.133579142539409	6.03781049198622	1.56219374165414e-09	1.83391e-08
LHX3	6.64678723107998	-2.28779	0.475160003787761	-4.81477620305126	1.47364948613766e-06	8.59866e-06
LIF	89.9012633991113	2.64362	0.298716575626925	8.84992286749346	8.75798037306767e-19	9.32327e-17
LILRA2	153.045580424405	0.824195	0.17496332178692	4.71067017237451	2.46903539367372e-06	1.36341e-05
LILRA5	3.77520353293828	1.7436	0.400394807417885	4.35469671189907	1.33251276238352e-05	6.16863e-05
LILRA6	24.3225686945052	1.49935	0.263037205814591	5.7001486321153	1.19703014941679e-08	1.13672e-07
LILRB1	241.877739945	0.927471	0.168993869387962	5.48819287713286	4.06066539534873e-08	3.4286e-07
LILRB2	57.492896122253	1.29279	0.198871889739369	6.50064181059529	7.99780555336041e-11	1.21827e-09
LILRB3	36.0564576262773	1.46831	0.240347309077376	6.10912641420967	1.00177957850438e-09	1.21484e-08
LILRB4	846.152448137364	0.770303	0.168910017951853	4.56043663231233	5.10473654473216e-06	2.61675e-05
LINGO1	2387.02406523352	-1.08204	0.155169073990626	-6.97331727068982	3.09553430775909e-12	6.50931e-11
LIPC	15.4578488859269	0.964925	0.202602242286938	4.76265939761994	1.9105817150587e-06	1.0823e-05
LITAF	1888.97893795998	0.714872	0.122692190614629	5.82655248219234	5.65840782261438e-09	5.77114e-08
LLGL2	90.7718131316767	0.888693	0.169081027319069	5.25601832003095	1.47207632684981e-07	1.0833e-06
LMNA	2131.9207988883	0.750714	0.130613571568411	5.74759605999163	9.05211747539773e-09	8.82876e-08
LMO2	1222.23684951436	0.837619	0.164285901980758	5.09854314228886	3.42277529005281e-07	2.33261e-06
LMTK3	893.356171612565	-0.588667	0.109330603710502	-5.38428156169149	7.27345731656224e-08	5.79896e-07
LOC100129534	50.2840590084039	0.773678	0.123668846063589	6.25604289686923	3.94868176982476e-10	5.25071e-09
LOC100130148	15.5632116876798	-0.843981	0.193507458304067	-4.36149095182812	1.29179139384967e-05	6.01168e-05
LOC100130776	174.798302823487	3.58399	0.2918698582761	12.2794108321946	1.16846063761655e-34	4.37846e-31
LOC100132215	42.167572851322	1.07575	0.181603907093189	5.92358882535379	3.14990461897888e-09	3.42125e-08
LOC100132707	77.0980111832799	1.27568	0.1629680229422	7.82779577335483	4.96497579709646e-15	2.10938e-13
LOC100133545	23.0875119038136	-1.32018	0.210364946868165	-6.27566645723457	3.48139792393734e-10	4.65911e-09
LOC100188949	2.17223789368858	1.48963	0.347525263694018	4.28638241615626	1.81606256548093e-05	8.14598e-05
LOC100270710	52.326473757038	1.00983	0.200486396371546	5.0369145120393	4.7309594279887e-07	3.11015e-06
LOC115110	25.8221064023656	0.82221	0.166223788445684	4.94640180963037	7.55978329945195e-07	4.75462e-06
LOC145837	21.6017396970131	-1.27052	0.177073404943451	-7.17509832711332	7.22552361594688e-13	1.73561e-11
LOC146336	3.03461426811377	-1.40825	0.312670335481626	-4.50393180123151	6.67076217554507e-06	3.31785e-05
LOC148145	76.2143344573383	-1.74068	0.319827107831903	-5.44257694725868	5.25152637010605e-08	4.31357e-07
LOC149837	61.6432932017814	0.960685	0.195128953047541	4.92333326826797	8.50823709065357e-07	5.28549e-06
LOC151534	34.7245588795363	0.86749	0.152038498897451	5.70572715106865	1.15847447485761e-08	1.10515e-07
LOC154761	21.1718421856572	1.02911	0.235180650909151	4.37582104930425	1.20976235911618e-05	5.67362e-05
LOC157627	146.264773298014	-1.69792	0.245477830827763	-6.91678258193299	4.62016321593432e-12	9.32795e-11
LOC201651	0.721825000248867	2.34811	0.460813178572753	5.0955748698261	3.47684576754217e-07	2.36451e-06
LOC219347	148.962656427879	-0.598184	0.115154530753267	-5.19461695481872	2.0514177679044e-07	1.46532e-06
LOC254559	2014.60599835746	-1.60287	0.188884196577765	-8.48601812693517	2.1383810377425e-17	1.65557e-15
LOC283314	10.7278729058547	1.9334	0.250984877720845	7.7032598142183	1.32638291600869e-14	5.05498e-13
LOC283392	7.62420741710539	-1.87597	0.339377978868914	-5.5276744639815	3.24503466416894e-08	2.79279e-07
LOC283761	81.8960777108751	-1.4662	0.217336922221922	-6.74621613618019	1.51750517867316e-11	2.70507e-10
LOC285401	33.7540841520604	-2.44998	0.457528686714677	-5.35481022285356	8.564626029622e-08	6.69728e-07
LOC285696	8.86388329472999	-1.45182	0.278566753446083	-5.21176224197276	1.8705518515694e-07	1.34691e-06
LOC338651	16.3414880678468	-1.19463	0.27963326481372	-4.27214102088161	1.93605070040645e-05	8.60998e-05
LOC338799	569.713447628927	-0.878594	0.154415966116649	-5.689786252757	1.27198491553275e-08	1.19819e-07
LOC339674	460.659323125766	-1.07131	0.146256705947419	-7.32483192336556	2.3919831566305e-13	6.39318e-12
LOC388387	4.18383976670085	-2.13367	0.408942390985301	-5.21753984505096	1.81315227767868e-07	1.3086e-06
LOC400759	17.0004429017902	2.52783	0.294206586347188	8.59203323583522	8.54436640822123e-18	7.1788e-16
LOC400804	2.3118356612709	3.03763	0.476253281657163	6.37818941054669	1.79193809651273e-10	2.53663e-09
LOC400891	6.31863673681035	2.28243	0.420633124346484	5.42618645822152	5.75708182441922e-08	4.67554e-07
LOC400931	73.9300132086912	-0.807982	0.186698259143202	-4.32774111546246	1.50646389931975e-05	6.88249e-05
LOC441204	148.298431609631	-0.873317	0.188065820896416	-4.64367943687471	3.42258468612038e-06	1.83183e-05
LOC554202	9.16971881138538	1.51313	0.349840688585928	4.32519409507902	1.52397617549669e-05	6.95402e-05
LOC619207	40.6594155732195	-1.19757	0.212250355642283	-5.64226606710748	1.67826479333045e-08	1.54592e-07
LOC643008	107.06171880673	1.49295	0.204470269137998	7.30153657404945	2.84499717055781e-13	7.49703e-12
LOC644165	25.6967163473025	-1.18283	0.226487084751672	-5.22252230889893	1.76502285231054e-07	1.27681e-06
LOC644538	120.907330191214	1.25908	0.186181612017581	6.76265691662976	1.35483810196019e-11	2.44314e-10
LOC647121	12.9561548140491	1.03699	0.188021099116991	5.51528294360845	3.48219273767824e-08	2.97774e-07
LOC647309	22.529184906767	5.14406	0.723510129182464	7.10986221061695	1.16158864280228e-12	2.66058e-11
LOC648740	45.230837622924	-1.10888	0.201961929822881	-5.4905214680097	4.00748774509551e-08	3.38828e-07
LOC650623	140.980776839388	-0.958104	0.160899266830428	-5.95468495009524	2.60573301756603e-09	2.89224e-08
LOC653786	2.69547171604558	1.70824	0.388318894713221	4.39907678080337	1.08712362132035e-05	5.16046e-05
LOC728989	13.5530643001894	-0.826043	0.18876578865023	-4.37602093836811	1.20865409035477e-05	5.67268e-05
LOC729234	212.370763994791	1.05265	0.197069097525373	5.34153044723273	9.21651319625055e-08	7.16517e-07
LOC92973	288.777118436436	-0.666982	0.130069474720151	-5.12789266112079	2.930034092213e-07	2.02356e-06
LOX	91.340187004969	1.83857	0.223667602955737	8.22011254945916	2.0331228751633e-16	1.1757e-14
LOXL1	79.3215890046727	1.98224	0.309710066723617	6.4003094639967	1.55062344047705e-10	2.21944e-09
LOXL3	391.349938692836	0.631963	0.125641265066886	5.02990112364921	4.90732835747922e-07	3.21257e-06
LOXL4	30.9492749284667	1.90193	0.290155440997999	6.55488026710311	5.56865384553192e-11	8.84939e-10
LPAR1	975.621615166986	1.12143	0.201703491578131	5.55979245861851	2.70095640976545e-08	2.36141e-07
LPAR6	506.044989507604	0.903232	0.124676375899291	7.24461057756711	4.3368346157871e-13	1.09214e-11
LPCAT2	626.190046488623	0.707728	0.161759507382444	4.37518846759424	1.21327605200092e-05	5.68706e-05
LPHN2	491.715475368065	1.06225	0.206329814947142	5.14832680836183	2.62820295060129e-07	1.8292e-06
LPIN3	52.0833108001263	1.50727	0.242339636383781	6.21967576461291	4.98183274728291e-10	6.47742e-09
LPPR1	1373.40481082009	-0.912924	0.19873972202842	-4.5935680642649	4.3573080919363e-06	2.269e-05
LPPR5	227.387926812623	-0.868998	0.195647200626064	-4.44165667862432	8.9268911276046e-06	4.31624e-05
LRAT	181.210119850941	1.29656	0.275236633456289	4.71071850410541	2.46844988152473e-06	1.36341e-05
LRFN5	146.195656549513	-1.24902	0.261984942748992	-4.76753100804058	1.86497298769554e-06	1.05821e-05
LRG1	11.2722337615805	0.985854	0.218435745822942	4.5132435977732	6.38436214220956e-06	3.19576e-05
LRGUK	13.2163078121868	1.89237	0.259991985582122	7.27856894650631	3.37379796578146e-13	8.74294e-12
LRIG1	15150.9954225379	-0.839531	0.120770798851884	-6.95144218913871	3.61570579232909e-12	7.47725e-11
[truncated: 1,309 more rows]

## Sheet: DAVID_analysis
Category	Term	Count	%	PValue	Genes	List Total	Pop Hits	Pop Total	Fold Enrichment	Bonferroni	Benjamini	FDR
[truncated: 1,672 more rows]

[truncated: 1 more sheets: DAVID_analysis_UP_DOWN]
