# Supplementary material for: Transmembrane Protein TMEM230, a Target of Glioblastoma Therapy
Source: Front Cell Neurosci. 2021 Nov 17;15:703431. doi: 10.3389/fncel.2021.703431 (PMC8636015; doi:10.3389/fncel.2021.703431)
Supplement: Supplementary Table1 — Patient clinical features include gender, age, tumor size in cm3 and TMEM230 expression level. [file Table_1.xlsx]

## Sheet: GBM_low
sample	samples	C20orf30	age_at_initial_pathologic_diagnosis	days_to_birth	days_to_collection	gender	histological_type	intermediate_dimension	longest_dimension	person_neoplasm_cancer_status	neoplasm_histologic_grade	new_neoplasm_event_type	shortest_dimension	tumor_location	tumor_tissue_site	tissue_source_site	_primary_site
TCGA-27-1837-01	TCGA-27-1837-01	11.14	36	-13368		MALE	Untreated primary (de novo) GBM	0.4	1	WITH TUMOR		Progression of Disease	0.2		Brain	27Milan - Italy, Fondazione IRCCS Instituto Neuroligico C. Besta	Brain
TCGA-32-2616-01	TCGA-32-2616-01	10.85	48	-17781		FEMALE	Untreated primary (de novo) GBM	0.4	0.6	WITH TUMOR		Progression of Disease	0.2		Brain	32St. Joseph's Hospital (AZ)	Brain
TCGA-26-5139-01	TCGA-26-5139-01	11.33	65	-23782		FEMALE	Untreated primary (de novo) GBM	0.4	1	WITH TUMOR			0.2		Brain	26University of Florida	Brain
TCGA-28-5209-01	TCGA-28-5209-01	11.03	66	-24362		FEMALE	Untreated primary (de novo) GBM	0.4	0.7				0.1		Brain	28Cedars Sinai	Brain
TCGA-32-1982-01	TCGA-32-1982-01	11.51	76	-27764		FEMALE	Untreated primary (de novo) GBM	0.4	0.9	WITH TUMOR			0.3		Brain	32St. Joseph's Hospital (AZ)	Brain
TCGA-19-1787-01	TCGA-19-1787-01	10.82	48	-17894		MALE	Untreated primary (de novo) GBM	0.5	0.5	WITH TUMOR		Recurrence	0.3		Brain	19Case Western	Brain
TCGA-28-5215-01	TCGA-28-5215-01	11.41	62	-22686		FEMALE	Untreated primary (de novo) GBM	0.5	0.8	WITH TUMOR		Progression of Disease	0.2		Brain	28Cedars Sinai	Brain
TCGA-14-1825-01	TCGA-14-1825-01	11.27	70	-25684		MALE	Untreated primary (de novo) GBM	0.5	1.2	WITH TUMOR		Progression of Disease	0.2		Brain	14 Emory University
TCGA-28-5204-01	TCGA-28-5204-01	11.17	72	-26490		MALE	Untreated primary (de novo) GBM	0.5	1	WITH TUMOR			0.2		Brain	28Cedars Sinai	Brain
TCGA-26-5134-01	TCGA-26-5134-01	11.39	74	-27111		MALE	Untreated primary (de novo) GBM	0.5	0.5	TUMOR FREE			0.4		Brain	26University of Florida	Brain
TCGA-26-5132-01	TCGA-26-5132-01	11.46	74	-27196		MALE	Untreated primary (de novo) GBM	0.5	1.5	TUMOR FREE			0.4		Brain	26University of Florida	Brain
TCGA-27-2521-01	TCGA-27-2521-01	11.22	34	-12685		MALE	Untreated primary (de novo) GBM	0.6	0.7	WITH TUMOR			0.2		Brain	27Milan - Italy, Fondazione IRCCS Instituto Neuroligico C. Besta	Brain
TCGA-28-5216-01	TCGA-28-5216-01	11.29	52	-19239		MALE	Untreated primary (de novo) GBM	0.6	0.8	WITH TUMOR			0.1		Brain	28Cedars Sinai	Brain
TCGA-28-1753-01	TCGA-28-1753-01	10.91	53	-19366		MALE	Untreated primary (de novo) GBM	0.6	1.5	WITH TUMOR			0.4		Brain	28Cedars Sinai	Brain
TCGA-06-0174-01	TCGA-06-0174-01	11.1	54	-19824		MALE	Untreated primary (de novo) GBM	0.6	1	WITH TUMOR		Progression of Disease	0.4		Brain	6Henry Ford Hospital	Brain
TCGA-06-5859-01	TCGA-06-5859-01	11.41	63	-23211		MALE	Untreated primary (de novo) GBM	0.6	0.8	WITH TUMOR			0.6		Brain	6Henry Ford Hospital	Brain
TCGA-06-0210-02	TCGA-06-0210-02	11.36	72	-26600		FEMALE	Untreated primary (de novo) GBM	0.6	0.8	WITH TUMOR		Progression of Disease	0.4		Brain	6Henry Ford Hospital	Brain
TCGA-19-4065-02	TCGA-19-4065-02	10.96	36	-13257		MALE	Untreated primary (de novo) GBM	0.7	0.9	WITH TUMOR		Recurrence	0.6		Brain	19Case Western	Brain
TCGA-19-0957-02	TCGA-19-0957-02	11.24	48	-17714		FEMALE	Untreated primary (de novo) GBM	0.7	1	WITH TUMOR		Recurrence	0.5		Brain	19Case Western	Brain
TCGA-76-4927-01	TCGA-76-4927-01	11.37	58	-21193		MALE	Untreated primary (de novo) GBM	0.7	1.7	WITH TUMOR		Progression of Disease	0.3		Brain	76Thomas Jefferson University	Brain
TCGA-08-0386-01	TCGA-08-0386-01	11.21	74	-27053		MALE	Untreated primary (de novo) GBM	0.7	0.7	WITH TUMOR		Recurrence	0.6		Brain	8UCSF	Brain
TCGA-16-0846-01	TCGA-16-0846-01	11.3	85	-31111		MALE	Untreated primary (de novo) GBM	0.7	2	WITH TUMOR			0.5		Brain	16Toronto Western Hospital	Brain
TCGA-06-2569-01	TCGA-06-2569-01	11.38	24	-8922		FEMALE	Untreated primary (de novo) GBM	0.8	0.8	WITH TUMOR			0.3		Brain	6Henry Ford Hospital	Brain
TCGA-12-3653-01	TCGA-12-3653-01	11.33	34	-12529		FEMALE	Untreated primary (de novo) GBM	0.8	1.1	WITH TUMOR		Progression of Disease	0.3		Brain	12Duke	Brain
TCGA-19-4065-01	TCGA-19-4065-01	11.51	36	-13257		MALE	Untreated primary (de novo) GBM	0.8	1	WITH TUMOR		Recurrence	0.3		Brain	19Case Western	Brain
TCGA-06-2564-01	TCGA-06-2564-01	11.19	50	-18435		MALE	Untreated primary (de novo) GBM	0.8	1.3	WITH TUMOR			0.8		Brain	6Henry Ford Hospital	Brain
TCGA-27-1834-01	TCGA-27-1834-01	11.52	56	-20568		MALE	Untreated primary (de novo) GBM	0.8	1.5	WITH TUMOR		Recurrence	0.8		Brain	27Milan - Italy, Fondazione IRCCS Instituto Neuroligico C. Besta	Brain
TCGA-41-5651-01	TCGA-41-5651-01	11.02	59	-21698		FEMALE	Untreated primary (de novo) GBM	0.8	1.7	WITH TUMOR		Progression of Disease	0.8		Brain	41Christiana Healthcare	Brain
TCGA-06-0190-02	TCGA-06-0190-02	11.26	62	-22835		MALE	Untreated primary (de novo) GBM	0.8	1.3	WITH TUMOR		Progression of Disease	0.5		Brain	6Henry Ford Hospital	Brain
TCGA-06-0171-02	TCGA-06-0171-02	11.26	65	-24085		MALE	Untreated primary (de novo) GBM	0.8	1.1	WITH TUMOR		Progression of Disease	0.8		Brain	6Henry Ford Hospital	Brain
TCGA-06-0152-02	TCGA-06-0152-02	11.19	68	-24844		MALE	Untreated primary (de novo) GBM	0.8	1	WITH TUMOR		Progression of Disease	0.6		Brain	6Henry Ford Hospital	Brain
TCGA-28-5207-01	TCGA-28-5207-01	11.46	71	-25975		MALE	Untreated primary (de novo) GBM	0.8	1	WITH TUMOR			0.3		Brain	28Cedars Sinai	Brain
TCGA-06-1804-01	TCGA-06-1804-01	11.28	81	-29802		FEMALE	Untreated primary (de novo) GBM	0.8	0.8	WITH TUMOR			0.7		Brain	6Henry Ford Hospital	Brain
TCGA-06-2570-01	TCGA-06-2570-01	10.95	21	-7936		FEMALE	Untreated primary (de novo) GBM	0.9	1.5	TUMOR FREE			0.9		Brain	6Henry Ford Hospital	Brain
TCGA-06-0129-01	TCGA-06-0129-01	10.62	30	-11284		MALE	Untreated primary (de novo) GBM	0.9	1.2	WITH TUMOR		Progression of Disease	0.9		Brain	6Henry Ford Hospital	Brain
TCGA-28-1747-01	TCGA-28-1747-01	11.49	44	-16301		MALE	Untreated primary (de novo) GBM	0.9	0.9				0.4		Brain	28Cedars Sinai	Brain
TCGA-06-5858-01	TCGA-06-5858-01	11	45	-16662		FEMALE	Untreated primary (de novo) GBM	0.9	0.9	WITH TUMOR		Progression of Disease	0.9		Brain	6Henry Ford Hospital	Brain
TCGA-12-3650-01	TCGA-12-3650-01	11.07	46	-17138		MALE	Untreated primary (de novo) GBM	0.9	1	WITH TUMOR		Progression of Disease	0.2		Brain	12Duke	Brain
TCGA-06-0156-01	TCGA-06-0156-01	11.44	57	-20932		MALE	Untreated primary (de novo) GBM	0.9	0.9	WITH TUMOR			0.4		Brain	6Henry Ford Hospital	Brain
TCGA-32-2615-01	TCGA-32-2615-01	11.16	62	-22916		MALE	Untreated primary (de novo) GBM	0.9	0.9	WITH TUMOR		Progression of Disease	0.4		Brain	32St. Joseph's Hospital (AZ)	Brain
TCGA-06-0190-01	TCGA-06-0190-01	11.46	62	-22835		MALE	Untreated primary (de novo) GBM	0.9	1.4	WITH TUMOR		Progression of Disease	0.9		Brain	6Henry Ford Hospital	Brain
TCGA-06-2557-01	TCGA-06-2557-01	11.29	76	-27980		MALE	Untreated primary (de novo) GBM	0.9	1.4	WITH TUMOR			0.9		Brain	6Henry Ford Hospital	Brain
TCGA-06-5416-01	TCGA-06-5416-01	11.23	23	-8533		FEMALE	Untreated primary (de novo) GBM	1	1.5	WITH TUMOR			0.4		Brain	6Henry Ford Hospital	Brain
TCGA-06-0221-02	TCGA-06-0221-02	10.05	31	-11333		MALE	Untreated primary (de novo) GBM	1	1.5	WITH TUMOR		Progression of Disease	0.3		Brain	6Henry Ford Hospital	Brain
TCGA-28-2514-01	TCGA-28-2514-01	11.05	45	-16737		MALE	Untreated primary (de novo) GBM	1	1.4				0.3		Brain	28Cedars Sinai	Brain
TCGA-06-5408-01	TCGA-06-5408-01	11.03	54	-20063		FEMALE	Untreated primary (de novo) GBM	1	1.1	WITH TUMOR		Progression of Disease	0.3		Brain	6Henry Ford Hospital	Brain
TCGA-19-2629-01	TCGA-19-2629-01	11.44	60	-22257		MALE	Untreated primary (de novo) GBM	1	1.7	WITH TUMOR		Progression of Disease	0.3		Brain	19Case Western	Brain
TCGA-41-4097-01	TCGA-41-4097-01	11.02	63	-23107		FEMALE	Untreated primary (de novo) GBM	1	1.9	WITH TUMOR			0.5		Brain	41Christiana Healthcare	Brain
TCGA-19-2620-01	TCGA-19-2620-01	11.04	70	-25665		MALE	Untreated primary (de novo) GBM	1	1.5	TUMOR FREE			0.4		Brain	19 Case Western	Brain
TCGA-15-1444-01	TCGA-15-1444-01	11.15	21	-7827		MALE	Glioblastoma Multiforme (GBM)	1.1	1.8	WITH TUMOR			0.5		Brain	15 Mayo Clinic - Rochester	Brain
TCGA-06-5411-01	TCGA-06-5411-01	11.38	51	-18832		MALE	Untreated primary (de novo) GBM	1.1	1.1	WITH TUMOR		Progression of Disease	0.3		Brain	6Henry Ford Hospital	Brain
TCGA-06-5414-01	TCGA-06-5414-01	11.39	61	-22527		MALE	Untreated primary (de novo) GBM	1.1	1.1	WITH TUMOR		Progression of Disease	0.3		Brain	6Henry Ford Hospital	Brain
TCGA-26-1442-01	TCGA-26-1442-01	10.87	43	-15950		MALE	Untreated primary (de novo) GBM	1.3	1.3	WITH TUMOR			0.3		Brain	26University of Florida	Brain
TCGA-02-2485-01	TCGA-02-2485-01	11.18	53	-19494		MALE	Untreated primary (de novo) GBM	2	2.1	WITH TUMOR		Progression of Disease	0.4		Brain	2 MD Anderson Cancer Center	Brain
TCGA-06-5417-01	TCGA-06-5417-01	10.76	45	-16572		FEMALE	Untreated primary (de novo) GBM			WITH TUMOR					Brain	6Henry Ford Hospital	Brain
TCGA-41-3915-01	TCGA-41-3915-01	11.35	48	-17880		MALE	Untreated primary (de novo) GBM			WITH TUMOR		Locoregional Disease			Brain	41Christiana Healthcare	Brain
TCGA-16-1045-01	TCGA-16-1045-01	11.42	49	-18195		FEMALE	Untreated primary (de novo) GBM			WITH TUMOR		Recurrence			Brain	16Toronto Western Hospital	Brain
TCGA-12-0618-01	TCGA-12-0618-01	11.13	49	-18071		MALE	Untreated primary (de novo) GBM								Brain	12Duke	Brain
TCGA-76-4932-01	TCGA-76-4932-01	10.96	50	-18433		FEMALE	Treated primary GBM			WITH TUMOR					Brain	76Thomas Jefferson University	Brain
TCGA-19-2624-01	TCGA-19-2624-01	11.09	51	-18891		MALE	Untreated primary (de novo) GBM			TUMOR FREE					Brain	19 Case Western	Brain
TCGA-06-0686-01	TCGA-06-0686-01	10.83	53	-19503		MALE	Untreated primary (de novo) GBM			WITH TUMOR		Progression of Disease			Brain	6Henry Ford Hospital	Brain
TCGA-14-0789-01	TCGA-14-0789-01	11.39	54	-20050		MALE	Untreated primary (de novo) GBM					Progression of Disease			Brain	14 Emory University
TCGA-19-2619-01	TCGA-19-2619-01	10.34	55	-20159		FEMALE	Untreated primary (de novo) GBM			WITH TUMOR		Progression of Disease			Brain	19 Case Western	Brain
TCGA-19-5960-01	TCGA-19-5960-01	11.45	56	-20641		MALE	Untreated primary (de novo) GBM			WITH TUMOR		Recurrence			Brain	19 Case Western	Brain
TCGA-27-1830-01	TCGA-27-1830-01	11.32	57	-21131		MALE	Untreated primary (de novo) GBM			WITH TUMOR		Recurrence			Brain	27Milan - Italy, Fondazione IRCCS Instituto Neuroligico C. Besta	Brain
TCGA-32-1970-01	TCGA-32-1970-01	10.65	59	-21613		MALE	Untreated primary (de novo) GBM			WITH TUMOR		Progression of Disease			Brain	32St. Joseph's Hospital (AZ)	Brain
TCGA-26-5133-01	TCGA-26-5133-01	11.51	59	-21560		MALE	Untreated primary (de novo) GBM			TUMOR FREE		Progression of Disease			Brain	26University of Florida	Brain
TCGA-14-1034-01	TCGA-14-1034-01	11.45	60	-22029		FEMALE	Untreated primary (de novo) GBM			WITH TUMOR		Progression of Disease			Brain	14 Emory University	Brain
TCGA-06-0646-01	TCGA-06-0646-01	11.02	60	-22273		MALE	Untreated primary (de novo) GBM			WITH TUMOR		Progression of Disease			Brain	6Henry Ford Hospital	Brain
TCGA-12-0619-01	TCGA-12-0619-01	11.26	60	-21920		MALE	Untreated primary (de novo) GBM			WITH TUMOR		Progression of Disease			Brain	12Duke	Brain
TCGA-19-1390-01	TCGA-19-1390-01	10.22	63	-23063		FEMALE	Untreated primary (de novo) GBM								Brain	19Case Western	Brain
TCGA-06-0125-01	TCGA-06-0125-01	11.37	63	-23343		FEMALE	Untreated primary (de novo) GBM			WITH TUMOR		Progression of Disease			Brain	6Henry Ford Hospital	Brain
TCGA-06-2567-01	TCGA-06-2567-01	11.34	65	-23759		MALE	Untreated primary (de novo) GBM			WITH TUMOR					Brain	6Henry Ford Hospital	Brain
TCGA-15-0742-01	TCGA-15-0742-01	11.41	65	-24050		MALE	Untreated primary (de novo) GBM					Progression of Disease			Brain	15 Mayo Clinic - Rochester	Brain
TCGA-06-0744-01	TCGA-06-0744-01	11.39	66	-24471		MALE	Untreated primary (de novo) GBM			TUMOR FREE					Brain	6Henry Ford Hospital	Brain
TCGA-06-0187-01	TCGA-06-0187-01	11.15	69	-25318		MALE	Untreated primary (de novo) GBM			WITH TUMOR		Recurrence			Brain	6Henry Ford Hospital	Brain
TCGA-76-4931-01	TCGA-76-4931-01	10.77	70	-25812		FEMALE	Untreated primary (de novo) GBM			WITH TUMOR		Progression of Disease			Brain	76Thomas Jefferson University	Brain
TCGA-26-5135-01	TCGA-26-5135-01	10.99	72	-26490		FEMALE	Untreated primary (de novo) GBM								Brain	26University of Florida	Brain
TCGA-19-2625-01	TCGA-19-2625-01	11.4	76	-27930		FEMALE	Untreated primary (de novo) GBM			TUMOR FREE					Brain	19Case Western	Brain
TCGA-02-0047-01	TCGA-02-0047-01	10.79	78	-28759		MALE	Untreated primary (de novo) GBM			WITH TUMOR		Progression of Disease			Brain	2 MD Anderson Cancer Center	Brain
TCGA-06-2559-01	TCGA-06-2559-01	10.93	83	-30580		MALE	Untreated primary (de novo) GBM			WITH TUMOR					Brain	6Henry Ford Hospital	Brain
TCGA-76-4928-01	TCGA-76-4928-01	11.48	85	-31267		FEMALE	Untreated primary (de novo) GBM			WITH TUMOR					Brain	76Thomas Jefferson University	Brain
TCGA-41-2571-01	TCGA-41-2571-01	11.52	89	-32612		MALE	Untreated primary (de novo) GBM			WITH TUMOR		Progression of Disease			Brain	41Christiana Healthcare	Brain

## Sheet: GBM_high
sample	samples	C20orf30	age_at_initial_pathologic_diagnosis	days_to_birth	days_to_collection	gender	histological_type	intermediate_dimension	longest_dimension	person_neoplasm_cancer_status	neoplasm_histologic_grade	new_neoplasm_event_type	shortest_dimension	tumor_location	tumor_tissue_site	tissue_source_site	_primary_site
TCGA-27-1835-01	TCGA-27-1835-01	12.04	53	-19444		FEMALE	Untreated primary (de novo) GBM	0.3	0.5	WITH TUMOR		Progression of Disease	0.1		Brain	27 Milan - Italy, Fondazione IRCCS Instituto Neuroligico C. Besta	Brain
TCGA-27-2519-01	TCGA-27-2519-01	11.9	48	-17715		MALE	Untreated primary (de novo) GBM	0.4	0.6	WITH TUMOR		Progression of Disease	0.3		Brain	27 Milan - Italy, Fondazione IRCCS Instituto Neuroligico C. Besta	Brain
TCGA-28-2499-01	TCGA-28-2499-01	12.03	59	-21838		MALE	Untreated primary (de novo) GBM	0.4	0.6				0.3		Brain	28Cedars Sinai	Brain
TCGA-28-5220-01	TCGA-28-5220-01	12.23	67	-24622		MALE	Untreated primary (de novo) GBM	0.4	0.7	WITH TUMOR		Progression of Disease	0.1		Brain	28 Cedars Sinai	Brain
TCGA-28-2513-01	TCGA-28-2513-01	11.93	69	-25421		FEMALE	Untreated primary (de novo) GBM	0.4	0.6	WITH TUMOR		Progression of Disease	0.4		Brain	28Cedars Sinai	Brain
TCGA-14-1034-02	TCGA-14-1034-02	11.74	60	-22029		FEMALE	Untreated primary (de novo) GBM	0.5	1.3	WITH TUMOR		Progression of Disease	0.3		Brain	14Emory University	Brain
TCGA-28-2509-01	TCGA-28-2509-01	11.89	77	-28240		FEMALE	Untreated primary (de novo) GBM	0.5	0.8				0.3		Brain	28Cedars Sinai	Brain
TCGA-26-5136-01	TCGA-26-5136-01	11.99	78	-28496		FEMALE	Untreated primary (de novo) GBM	0.5	1	WITH TUMOR			0.1		Brain	26University of Florida	Brain
TCGA-32-2632-01	TCGA-32-2632-01	11.65	80	-29281		MALE	Untreated primary (de novo) GBM	0.5	1.2	WITH TUMOR			0.3		Brain	32St. Joseph's Hospital (AZ)	Brain
TCGA-27-2524-01	TCGA-27-2524-01	11.69	56	-20555		MALE	Untreated primary (de novo) GBM	0.6	0.9	WITH TUMOR			0.3		Brain	27Milan - Italy, Fondazione IRCCS Instituto Neuroligico C. Besta	Brain
TCGA-14-1402-02	TCGA-14-1402-02	12.71	58	-21421		FEMALE	Untreated primary (de novo) GBM	0.6	1	WITH TUMOR		Progression of Disease	0.2		Brain	14Emory University	Brain
TCGA-27-1832-01	TCGA-27-1832-01	11.85	59	-21678		FEMALE	Untreated primary (de novo) GBM	0.6	1	WITH TUMOR		Progression of Disease	0.6		Brain	27Milan - Italy, Fondazione IRCCS Instituto Neuroligico C. Besta	Brain
TCGA-28-5218-01	TCGA-28-5218-01	11.71	63	-23096		MALE	Untreated primary (de novo) GBM	0.6	0.7				0.2		Brain	28Cedars Sinai	Brain
TCGA-14-0790-01	TCGA-14-0790-01	11.98	64	-23674		FEMALE	Untreated primary (de novo) GBM	0.6	1.2	WITH TUMOR			0.2		Brain	14Emory University	Brain
TCGA-76-4926-01	TCGA-76-4926-01	11.95	68	-25085		MALE	Untreated primary (de novo) GBM	0.6	1.1	WITH TUMOR		Progression of Disease	0.4		Brain	76Thomas Jefferson University	Brain
TCGA-12-0616-01	TCGA-12-0616-01	11.83	36	-13451		FEMALE	Untreated primary (de novo) GBM	0.7	0.8	WITH TUMOR		Progression of Disease	0.5		Brain	12Duke	Brain
TCGA-28-5208-01	TCGA-28-5208-01	11.7	52	-19053		MALE	Untreated primary (de novo) GBM	0.7	1.1	WITH TUMOR		Progression of Disease	0.4		Brain	28Cedars Sinai	Brain
TCGA-27-2528-01	TCGA-27-2528-01	11.94	62	-22867		MALE	Untreated primary (de novo) GBM	0.7	1	WITH TUMOR		Progression of Disease	0.3		Brain	27Milan - Italy, Fondazione IRCCS Instituto Neuroligico C. Besta	Brain
TCGA-14-0871-01	TCGA-14-0871-01	11.57	74	-27387		FEMALE	Untreated primary (de novo) GBM	0.7	1.2				0.3		Brain	14Emory University	Brain
TCGA-06-0878-01	TCGA-06-0878-01	11.6	74	-27319		MALE	Untreated primary (de novo) GBM	0.7	1.2	WITH TUMOR		Recurrence	0.7		Brain	6Henry Ford Hospita	Brain
TCGA-06-0882-01	TCGA-06-0882-01	11.9	30	-11112		MALE	Untreated primary (de novo) GBM	0.8	1.4	WITH TUMOR		Recurrence	0.6		Brain	6Henry Ford Hospita	Brain
TCGA-06-2565-01	TCGA-06-2565-01	11.55	59	-21559		MALE	Untreated primary (de novo) GBM	0.8	1.5	WITH TUMOR		Recurrence	0.8		Brain	6Henry Ford Hospita	Brain
TCGA-12-3652-01	TCGA-12-3652-01	12.53	60	-21920		MALE	Untreated primary (de novo) GBM	0.8	1	WITH TUMOR		Progression of Disease	0.3		Brain	12Duke	Brain
TCGA-06-0125-02	TCGA-06-0125-02	11.67	63	-23343		FEMALE	Untreated primary (de novo) GBM	0.8	1.2	WITH TUMOR		Progression of Disease	0.6		Brain	6Henry Ford Hospita	Brain
TCGA-06-5413-01	TCGA-06-5413-01	11.62	67	-24477		MALE	Untreated primary (de novo) GBM	0.8	1	WITH TUMOR		Progression of Disease	0.5		Brain	6Henry Ford Hospital	Brain
TCGA-76-4925-01	TCGA-76-4925-01	11.91	76	-28011		MALE	Untreated primary (de novo) GBM	0.8	1			Progression of Disease	0.2		Brain	76Thomas Jefferson University	Brain
TCGA-06-2562-01	TCGA-06-2562-01	11.86	81	-29753		MALE	Untreated primary (de novo) GBM	0.8	0.8	WITH TUMOR		Progression of Disease	0.6		Brain	6Henry Ford Hospital	Brain
TCGA-06-0178-01	TCGA-06-0178-01	12.96	38	-14235		MALE	Untreated primary (de novo) GBM	0.9	0.9	TUMOR FREE		Progression of Disease	0.2		Brain	6Henry Ford Hospital	Brain
TCGA-06-0138-01	TCGA-06-0138-01	12.28	43	-15736		MALE	Untreated primary (de novo) GBM	0.9	1.7	WITH TUMOR		Progression of Disease	0.8		Brain	6Henry Ford Hospital	Brain
TCGA-06-0132-01	TCGA-06-0132-01	12	49	-18125		MALE	Untreated primary (de novo) GBM	0.9	0.9	WITH TUMOR		Progression of Disease	0.8		Brain	6Henry Ford Hospital	Brain
TCGA-19-1389-02	TCGA-19-1389-02	11.9	51	-18659		MALE	Untreated primary (de novo) GBM	0.9	1.1	WITH TUMOR		Recurrence	0.5		Brain	19Case Western	Brain
TCGA-06-0645-01	TCGA-06-0645-01	11.78	55	-20449		FEMALE	Untreated primary (de novo) GBM	0.9	1.3	WITH TUMOR			0.9		Brain	6Henry Ford Hospital	Brain
TCGA-06-5856-01	TCGA-06-5856-01	11.56	58	-21232		MALE	Untreated primary (de novo) GBM	0.9	1	WITH TUMOR			0.9		Brain	6Henry Ford Hospital	Brain
TCGA-12-5295-01	TCGA-12-5295-01	11.87	60	-22161		FEMALE	Untreated primary (de novo) GBM	0.9	1.3	WITH TUMOR		Progression of Disease	0.4		Brain	12Duke	Brain
TCGA-06-0141-01	TCGA-06-0141-01	11.62	62	-22926		MALE	Untreated primary (de novo) GBM	0.9	1.1	WITH TUMOR		Progression of Disease	0.9		Brain	6Henry Ford Hospital	Brain
TCGA-02-2486-01	TCGA-02-2486-01	12.31	64	-23394		MALE	Untreated primary (de novo) GBM	0.9	1	WITH TUMOR			0.1		Brain	2MD Anderson Cancer Center	Brain
TCGA-06-5410-01	TCGA-06-5410-01	11.88	72	-26395		FEMALE	Untreated primary (de novo) GBM	0.9	1	WITH TUMOR			0.5		Brain	6Henry Ford Hospital	Brain
TCGA-06-0158-01	TCGA-06-0158-01	11.6	73	-26856		MALE	Untreated primary (de novo) GBM	0.9	1.8	WITH TUMOR		Progression of Disease	0.9		Brain	6Henry Ford Hospital	Brain
TCGA-02-2483-01	TCGA-02-2483-01	11.82	43	-15964		MALE	Untreated primary (de novo) GBM	1	1.6	WITH TUMOR			0.2		Brain	2 MD Anderson Cancer Center	Brain
TCGA-14-0736-02	TCGA-14-0736-02	12.65	49	-18219		MALE	Untreated primary (de novo) GBM	1	1.5	WITH TUMOR		Recurrence	0.3		Brain	14Emory University	Brain
TCGA-14-1829-01	TCGA-14-1829-01	13.15	57	-20929		MALE	Untreated primary (de novo) GBM	1	1.2	WITH TUMOR			0.2		Brain	14Emory University	Brain
TCGA-12-1597-01	TCGA-12-1597-01	12.28	62	-22865		FEMALE	Untreated primary (de novo) GBM	1	1	WITH TUMOR		Progression of Disease	0.4		Brain	12Duke	Brain
TCGA-14-0817-01	TCGA-14-0817-01	12.2	69	-25425		FEMALE	Untreated primary (de novo) GBM	1	1				0.3		Brain	14Emory University	Brain
TCGA-06-2558-01	TCGA-06-2558-01	11.53	75	-27511		FEMALE	Untreated primary (de novo) GBM	1	2				0.5		Brain	6Henry Ford Hospital	Brain
TCGA-14-0781-01	TCGA-14-0781-01	11.66	49	-17903		MALE	Untreated primary (de novo) GBM	1.1	1.5	WITH TUMOR			0.3		Brain	14Emory University	Brain
TCGA-06-0211-02	TCGA-06-0211-02	12	47	-17515		MALE	Untreated primary (de novo) GBM	1.2	1.4	WITH TUMOR		Progression of Disease	0.3		Brain	6Henry Ford Hospital	Brain
TCGA-06-0750-01	TCGA-06-0750-01	11.89	43	-16018		MALE	Untreated primary (de novo) GBM			WITH TUMOR					Brain	6Henry Ford Hospital	Brain
TCGA-06-0238-01	TCGA-06-0238-01	12.09	46	-17037		MALE	Untreated primary (de novo) GBM			WITH TUMOR		Progression of Disease			Brain	6Henry Ford Hospital	Brain
TCGA-32-4213-01	TCGA-32-4213-01	11.61	47	-17237		FEMALE	Untreated primary (de novo) GBM			WITH TUMOR		Recurrence			Brain	32St. Joseph's Hospital (AZ)	Brain
TCGA-06-0211-01	TCGA-06-0211-01	11.82	47	-17515		MALE	Untreated primary (de novo) GBM			WITH TUMOR		Progression of Disease			Brain	6Henry Ford Hospital	Brain
TCGA-06-0749-01	TCGA-06-0749-01	11.57	50	-18571		MALE	Untreated primary (de novo) GBM			WITH TUMOR					Brain	6Henry Ford Hospital	Brain
TCGA-14-2554-01	TCGA-14-2554-01	12.78	52	-19090		FEMALE	Untreated primary (de novo) GBM			WITH TUMOR		Locoregional Disease			Brain	14Emory University	Brain
TCGA-06-2561-01	TCGA-06-2561-01	11.62	53	-19505		FEMALE	Untreated primary (de novo) GBM			WITH TUMOR		Locoregional Disease			Brain	6Henry Ford Hospital	Brain
TCGA-06-0747-01	TCGA-06-0747-01	12.02	53	-19657		MALE	Untreated primary (de novo) GBM			WITH TUMOR					Brain	6Henry Ford Hospital	Brain
TCGA-06-0130-01	TCGA-06-0130-01	11.85	54	-19812		MALE	Untreated primary (de novo) GBM			WITH TUMOR		Progression of Disease			Brain	6Henry Ford Hospital	Brain
TCGA-12-5299-01	TCGA-12-5299-01	11.53	56	-20463		FEMALE	Untreated primary (de novo) GBM			WITH TUMOR					Brain	12Duke	Brain
TCGA-14-1823-01	TCGA-14-1823-01	12.91	58	-21384		FEMALE	Untreated primary (de novo) GBM			WITH TUMOR		Recurrence			Brain	14Emory University	Brain
TCGA-06-0168-01	TCGA-06-0168-01	11.66	59	-21776		FEMALE	Untreated primary (de novo) GBM			WITH TUMOR		Progression of Disease			Brain	6Henry Ford Hospital	Brain
TCGA-06-0745-01	TCGA-06-0745-01	12.37	59	-21884		MALE	Untreated primary (de novo) GBM			WITH TUMOR		Progression of Disease			Brain	6Henry Ford Hospital	Brain
TCGA-06-5415-01	TCGA-06-5415-01	11.94	60	-22213		MALE	Untreated primary (de novo) GBM			WITH TUMOR					Brain	6Henry Ford Hospital	Brain
TCGA-02-0055-01	TCGA-02-0055-01	12.01	62	-22798		FEMALE	Untreated primary (de novo) GBM			WITH TUMOR		Progression of Disease			Brain	2MD Anderson Cancer Center	Brain
TCGA-12-0821-01	TCGA-12-0821-01	11.55	62	-22949		MALE	Untreated primary (de novo) GBM			WITH TUMOR		Recurrence			Brain	12Duke	Brain
TCGA-06-0157-01	TCGA-06-0157-01	11.68	63	-23128		FEMALE	Untreated primary (de novo) GBM			WITH TUMOR					Brain	6Henry Ford Hospital	Brain
TCGA-27-2523-01	TCGA-27-2523-01	11.6	63	-23034		MALE	Untreated primary (de novo) GBM			WITH TUMOR		Progression of Disease			Brain	27Milan - Italy, Fondazione IRCCS Instituto Neuroligico C. Besta	Brain
TCGA-06-0184-01	TCGA-06-0184-01	12.24	63	-23317		MALE	Untreated primary (de novo) GBM			TUMOR FREE					Brain	6Henry Ford Hospital	Brain
TCGA-32-5222-01	TCGA-32-5222-01	12.27	66	-24134		MALE	Untreated primary (de novo) GBM			WITH TUMOR		Progression of Disease			Brain	32St. Joseph's Hospital (AZ)	Brain
TCGA-27-1831-01	TCGA-27-1831-01	13.19	66	-24447		MALE	Untreated primary (de novo) GBM			WITH TUMOR		Progression of Disease			Brain	27Milan - Italy, Fondazione IRCCS Instituto Neuroligico C. Besta	Brain
TCGA-32-2638-01	TCGA-32-2638-01	11.91	67	-24658		MALE	Untreated primary (de novo) GBM			WITH TUMOR					Brain	32St. Joseph's Hospital (AZ)	Brain
TCGA-41-2572-01	TCGA-41-2572-01	12.06	67	-24505		MALE	Untreated primary (de novo) GBM			WITH TUMOR		Progression of Disease			Brain	41Christiana Healthcare	Brain
TCGA-06-0219-01	TCGA-06-0219-01	12.37	67	-24488		MALE	Untreated primary (de novo) GBM			WITH TUMOR					Brain	6Henry Ford Hospital	Brain
TCGA-06-0743-01	TCGA-06-0743-01	12.03	69	-25434		MALE	Untreated primary (de novo) GBM			WITH TUMOR		Locoregional Disease			Brain	6Henry Ford Hospital	Brain
TCGA-14-0787-01	TCGA-14-0787-01	12.04	69	-25326		MALE	Untreated primary (de novo) GBM								Brain	14Emory University	Brain
TCGA-06-0644-01	TCGA-06-0644-01	11.69	71	-26247		MALE	Untreated primary (de novo) GBM			WITH TUMOR		Recurrence			Brain	6Henry Ford Hospital	Brain
TCGA-06-0210-01	TCGA-06-0210-01	11.56	72	-26600		FEMALE	Untreated primary (de novo) GBM			WITH TUMOR		Progression of Disease			Brain	6Henry Ford Hospital	Brain
TCGA-06-2563-01	TCGA-06-2563-01	11.98	72	-26643		FEMALE	Untreated primary (de novo) GBM			WITH TUMOR					Brain	6Henry Ford Hospital	Brain
TCGA-32-1980-01	TCGA-32-1980-01	11.77	72	-26467		MALE	Untreated primary (de novo) GBM			WITH TUMOR					Brain	32St. Joseph's Hospital (AZ)	Brain
TCGA-28-5213-01	TCGA-28-5213-01	12.39	72	-26491		MALE	Untreated primary (de novo) GBM			WITH TUMOR					Brain	28Cedars Sinai	Brain
TCGA-06-0649-01	TCGA-06-0649-01	11.92	73	-26796		FEMALE	Untreated primary (de novo) GBM			WITH TUMOR					Brain	6Henry Ford Hospital	Brain
TCGA-06-5418-01	TCGA-06-5418-01	11.54	75	-27584		FEMALE	Untreated primary (de novo) GBM			WITH TUMOR					Brain	6Henry Ford Hospital	Brain
TCGA-76-4929-01	TCGA-76-4929-01	11.84	76	-27831		FEMALE	Untreated primary (de novo) GBM			WITH TUMOR					Brain	76Thomas Jefferson University	Brain
TCGA-06-5412-01	TCGA-06-5412-01	12.01	78	-28762		FEMALE	Untreated primary (de novo) GBM			WITH TUMOR		Progression of Disease			Brain	6Henry Ford Hospital	Brain
TCGA-27-2526-01	TCGA-27-2526-01	12.92	79	-28977		FEMALE	Untreated primary (de novo) GBM			WITH TUMOR					Brain	27Milan - Italy, Fondazione IRCCS Instituto Neuroligico C. Besta	Brain
TCGA-32-2634-01	TCGA-32-2634-01	11.73	82	-29964		MALE	Untreated primary (de novo) GBM			TUMOR FREE					Brain	32St. Joseph's Hospital (AZ)	Brain

## Sheet: LGG_low_
sample	samples	C20orf30	age_at_initial_pathologic_diagnosis	days_to_birth	days_to_collection	gender	histological_type	intermediate_dimension	longest_dimension	person_neoplasm_cancer_status	neoplasm_histologic_grade	new_neoplasm_event_type	shortest_dimension	tumor_location	tumor_tissue_site	tissue_source_site	_primary_site
TCGA-VM-A8CH-01	TCGA-VM-A8CH-01	10.21	24	-9005		FEMALE	Astrocytoma			TUMOR FREE	G2			Supratentorial, Frontal Lobe	Central nervous system	VM Huntsman Cancer Institute	Brain
TCGA-DB-A75M-01	TCGA-DB-A75M-01	10.21	47	-17289	189	MALE	Astrocytoma			TUMOR FREE	G2			Supratentorial, Parietal Lobe	Central nervous system	DB Mayo Clinic - Rochester	Brain
TCGA-P5-A735-01	TCGA-P5-A735-01	10.24	38	-14152		FEMALE	Astrocytoma			TUMOR FREE	G2			Supratentorial, Temporal Lobe	Central nervous system	P5 Cureline	Brain
TCGA-DU-A76O-01	TCGA-DU-A76O-01	10.25	30	-10960	138	MALE	Astrocytoma			WITH TUMOR	G2			Supratentorial, Frontal Lobe	Central nervous system	DU Henry Ford Hospital	Brain
TCGA-HT-7884-01	TCGA-HT-7884-01	10.25	44	-16280		FEMALE	Astrocytoma			TUMOR FREE	G2			Supratentorial, Frontal Lobe	Central nervous system	HT Case Western - St Joes
TCGA-P5-A5EW-01	TCGA-P5-A5EW-01	10.26	20	-7612		FEMALE	Astrocytoma			TUMOR FREE	G2			Supratentorial, Frontal Lobe	Central nervous system	P5 Cureline	Brain
TCGA-S9-A6WO-01	TCGA-S9-A6WO-01	10.29	29	-10933		MALE	Astrocytoma			WITH TUMOR	G2			Supratentorial, Frontal Lobe	Central nervous system	S9 Dept of Neurosurgery at University of Heidelberg
TCGA-WY-A859-01	TCGA-WY-A859-01	10.29	34	-12631		FEMALE	Astrocytoma			WITH TUMOR	G2			Supratentorial, Frontal Lobe	Central nervous system	WY Johns Hopkins	Brain
TCGA-S9-A6TZ-01	TCGA-S9-A6TZ-01	10.33	39	-14592		FEMALE	Astrocytoma			WITH TUMOR	G2			Supratentorial, Frontal Lobe	Central nervous system	S9 Dept of Neurosurgery at University of Heidelberg
TCGA-TQ-A7RV-01	TCGA-TQ-A7RV-01	10.34	27	-10167	1470	MALE	Astrocytoma			WITH TUMOR	G2			Supratentorial, Temporal Lobe	Central nervous system	TQ University of Sao Paulo	Brain
TCGA-E1-A7Z3-01	TCGA-E1-A7Z3-01	10.34	31	-11330	7912	FEMALE	Astrocytoma			WITH TUMOR	G2			Supratentorial, Parietal Lobe	Central nervous system	E1 Duke
TCGA-CS-6667-01	TCGA-CS-6667-01	10.35	39	-14375		FEMALE	Astrocytoma	0.6	0.6	WITH TUMOR	G2		0.2	Supratentorial, Parietal Lobe	Central nervous system	CS Thomas Jefferson University	Brain
TCGA-DB-A75P-01	TCGA-DB-A75P-01	10.36	25	-9413		FEMALE	Astrocytoma			TUMOR FREE	G2			Supratentorial, Temporal Lobe	Central nervous system	DB Mayo Clinic - Rochester
TCGA-DU-A7TC-01	TCGA-DU-A7TC-01	10.41	32	-11884		MALE	Astrocytoma			WITH TUMOR	G2			Supratentorial, Frontal Lobe	Central nervous system	DU Henry Ford Hospital	Brain
TCGA-TM-A7CA-01	TCGA-TM-A7CA-01	10.42	44	-16415	830	MALE	Astrocytoma			TUMOR FREE	G2			Supratentorial, Frontal Lobe	Central nervous system	TM The University of New South Wales	Brain
TCGA-TQ-A7RV-02	TCGA-TQ-A7RV-02	10.43	27	-10167	1544	MALE	Astrocytoma			WITH TUMOR	G2			Supratentorial, Temporal Lobe	Central nervous system	TQ University of Sao Paulo	Brain
TCGA-S9-A6U5-01	TCGA-S9-A6U5-01	10.43	33	-12417		MALE	Astrocytoma			TUMOR FREE	G2			Supratentorial, Temporal Lobe	Central nervous system	S9 Dept of Neurosurgery at University of Heidelberg
TCGA-HW-A5KL-01	TCGA-HW-A5KL-01	10.45	42	-15513		FEMALE	Astrocytoma			WITH TUMOR	G2			Supratentorial, Temporal Lobe	Central nervous system	HW MSKCC	Brain
TCGA-TM-A7CF-01	TCGA-TM-A7CF-01	10.47	41	-15178	1453	FEMALE	Astrocytoma			WITH TUMOR	G2			Supratentorial, Frontal Lobe	Central nervous system	TM The University of New South Wales	Brain
TCGA-WY-A85A-01	TCGA-WY-A85A-01	10.48	20	-7380	1203	MALE	Astrocytoma			TUMOR FREE	G2			Supratentorial, Frontal Lobe	Central nervous system	WY Johns Hopkins	Brain
TCGA-TM-A7C4-01	TCGA-TM-A7C4-01	10.49	39	-14603	1215	FEMALE	Astrocytoma			TUMOR FREE	G2			Supratentorial, Temporal Lobe	Central nervous system	TM The University of New South Wales	Brain
TCGA-S9-A6U8-01	TCGA-S9-A6U8-01	10.51	24	-9044	2962	MALE	Astrocytoma			WITH TUMOR	G2			Supratentorial, Temporal Lobe	Central nervous system	S9 Dept of Neurosurgery at University of Heidelberg
TCGA-P5-A5EV-01	TCGA-P5-A5EV-01	10.51	39	-14310		MALE	Astrocytoma			WITH TUMOR	G2			Supratentorial, Temporal Lobe	Central nervous system	P5 Cureline	Brain
TCGA-WY-A85C-01	TCGA-WY-A85C-01	10.52	36	-13506	1119	MALE	Astrocytoma			WITH TUMOR	G2			Supratentorial, Frontal Lobe	Central nervous system	WY Johns Hopkins	Brain
TCGA-HT-A616-01	TCGA-HT-A616-01	10.54	36	-13222	70	FEMALE	Astrocytoma				G2			Supratentorial, Frontal Lobe	Central nervous system	HT Case Western - St Joes
TCGA-FG-A60L-01	TCGA-FG-A60L-01	10.55	34	-12580		FEMALE	Astrocytoma			TUMOR FREE	G2			Supratentorial, Temporal Lobe	Central nervous system	FG Case Western	Brain
TCGA-S9-A6TU-01	TCGA-S9-A6TU-01	10.55	38	-14108		MALE	Astrocytoma			WITH TUMOR	G2			Supratentorial, Temporal Lobe	Central nervous system	S9 Dept of Neurosurgery at University of Heidelberg
TCGA-E1-A7Z6-01	TCGA-E1-A7Z6-01	10.56	41	-14985	1588	FEMALE	Astrocytoma			WITH TUMOR	G2			Supratentorial, Frontal Lobe	Central nervous system	E1 Duke
TCGA-S9-A7R3-01	TCGA-S9-A7R3-01	10.6	28	-10342	2706	FEMALE	Astrocytoma			TUMOR FREE	G2			Supratentorial, Frontal Lobe	Central nervous system	S9 Dept of Neurosurgery at University of Heidelberg
TCGA-TM-A7CF-02	TCGA-TM-A7CF-02	10.61	41	-15178	1453	FEMALE	Astrocytoma			WITH TUMOR	G2			Supratentorial, Frontal Lobe	Central nervous system	TM The University of New South Wales	Brain
TCGA-WY-A85B-01	TCGA-WY-A85B-01	10.62	24	-8817	1073	MALE	Astrocytoma			TUMOR FREE	G2			Supratentorial, Temporal Lobe	Central nervous system	WY Johns Hopkins	Brain
TCGA-HT-A5RB-01	TCGA-HT-A5RB-01	10.62	24	-8820	597	MALE	Astrocytoma				G2			Supratentorial, Frontal Lobe	Central nervous system	HT Case Western - St Joes
TCGA-TM-A84C-01	TCGA-TM-A84C-01	10.62	32	-11849	459	MALE	Astrocytoma			WITH TUMOR	G2			Posterior Fossa, Brain Stem	Central nervous system	TM The University of New South Wales	Brain
TCGA-HT-7858-01	TCGA-HT-7858-01	10.63	28	-10422		MALE	Astrocytoma	1.8	2.3	TUMOR FREE	G2		0.6	Supratentorial, Frontal Lobe	Central nervous system	HT Case Western - St Joes
TCGA-FG-A87N-01	TCGA-FG-A87N-01	9.522	37	-13606		FEMALE	Astrocytoma			WITH TUMOR	G3			Supratentorial, Frontal Lobe	Central nervous system	FG Case Western	Brain
TCGA-P5-A72X-01	TCGA-P5-A72X-01	10.04	21	-7913		MALE	Astrocytoma			TUMOR FREE	G3			Supratentorial, Temporal Lobe	Central nervous system	P5 Cureline	Brain
TCGA-DB-A4XD-01	TCGA-DB-A4XD-01	10.05	32	-11741		MALE	Astrocytoma			TUMOR FREE	G3			Supratentorial, Temporal Lobe	Central nervous system	DB Mayo Clinic - Rochester	Brain
TCGA-S9-A89V-01	TCGA-S9-A89V-01	10.06	70	-25570		MALE	Astrocytoma			WITH TUMOR	G3			Posterior Fossa, Cerebellum	Central nervous system	S9 Dept of Neurosurgery at University of Heidelberg
TCGA-DU-A6S7-01	TCGA-DU-A6S7-01	10.11	27	-10170		FEMALE	Astrocytoma			TUMOR FREE	G3			Supratentorial, Frontal Lobe	Central nervous system	DU Henry Ford Hospital	Brain
TCGA-HT-A4DS-01	TCGA-HT-A4DS-01	10.12	55	-20296	137	FEMALE	Astrocytoma			TUMOR FREE	G3			Supratentorial, Temporal Lobe	Central nervous system	HT Case Western - St Joes
TCGA-HW-8320-01	TCGA-HW-8320-01	10.13	36	-13503		MALE	Astrocytoma	1	1.7	WITH TUMOR	G3		1	Supratentorial, Parietal Lobe	Central nervous system	HW MSKCC	Brain
TCGA-S9-A7R8-01	TCGA-S9-A7R8-01	10.13	44	-16275	3282	FEMALE	Astrocytoma			WITH TUMOR	G3			Supratentorial, Frontal Lobe	Central nervous system	S9 Dept of Neurosurgery at University of Heidelberg
TCGA-DH-A7UV-01	TCGA-DH-A7UV-01	10.13	49	-18161		MALE	Astrocytoma			WITH TUMOR	G3			Supratentorial, Temporal Lobe	Central nervous system	DH University of Florida	Brain
TCGA-CS-5394-01	TCGA-CS-5394-01	10.14	40	-14920		MALE	Astrocytoma	0.7	1.2		G3		0.6	Supratentorial, Frontal Lobe	Central nervous system	CS Thomas Jefferson University	Brain
TCGA-HT-7855-01	TCGA-HT-7855-01	10.23	39	-14496		MALE	Astrocytoma	1.5	1.6	TUMOR FREE	G3		0.6	Supratentorial, Parietal Lobe	Central nervous system	HT Case Western - St Joes
TCGA-E1-A7YI-01	TCGA-E1-A7YI-01	10.23	33	-12229	2022	FEMALE	Astrocytoma			WITH TUMOR	G3			Supratentorial, Occipital Lobe	Central nervous system	E1 Duke
TCGA-DB-A4XB-01	TCGA-DB-A4XB-01	10.28	38	-13990		MALE	Astrocytoma			TUMOR FREE	G3			Supratentorial, Parietal Lobe	Central nervous system	DB Mayo Clinic - Rochester	Brain
TCGA-HT-8564-01	TCGA-HT-8564-01	10.3	47	-17499		MALE	Astrocytoma	0.4	0.7	WITH TUMOR	G3		0.3	Supratentorial, Temporal Lobe	Central nervous system	HT Case Western - St Joes
TCGA-S9-A7QW-01	TCGA-S9-A7QW-01	10.3	54	-19869		FEMALE	Astrocytoma			WITH TUMOR	G3			Supratentorial, Frontal Lobe	Central nervous system	S9 Dept of Neurosurgery at University of Heidelberg
TCGA-DB-A75L-01	TCGA-DB-A75L-01	10.31	36	-13338	75	FEMALE	Astrocytoma			TUMOR FREE	G3			Supratentorial, Frontal Lobe	Central nervous system	DB Mayo Clinic - Rochester	Brain
TCGA-S9-A6U6-01	TCGA-S9-A6U6-01	10.36	28	-10253		MALE	Astrocytoma			TUMOR FREE	G3			Supratentorial, Temporal Lobe	Central nervous system	S9 Dept of Neurosurgery at University of Heidelberg
TCGA-HW-8321-01	TCGA-HW-8321-01	10.4	31	-11474		MALE	Astrocytoma	1	1.6	WITH TUMOR	G3		0.5	Supratentorial, Frontal Lobe	Central nervous system	HW MSKCC	Brain
TCGA-DB-A75O-01	TCGA-DB-A75O-01	10.43	29	-10812	981	MALE	Astrocytoma				G3			Supratentorial, Frontal Lobe	Central nervous system	DB Mayo Clinic - Rochester	Brain
TCGA-S9-A7R4-01	TCGA-S9-A7R4-01	10.43	46	-17134		MALE	Astrocytoma			WITH TUMOR	G3			Supratentorial, Frontal Lobe	Central nervous system	S9 Dept of Neurosurgery at University of Heidelberg
TCGA-DU-7299-01	TCGA-DU-7299-01	10.45	33	-12266		MALE	Astrocytoma	1	1	WITH TUMOR	G3		0.3	Supratentorial, Parietal Lobe	Central nervous system	DU Henry Ford Hospital	Brain
TCGA-RY-A843-01	TCGA-RY-A843-01	10.45	30	-11083	312	MALE	Astrocytoma			WITH TUMOR	G3			Supratentorial, Temporal Lobe	Central nervous system	RY University of California San Francisco	Brain
TCGA-S9-A7IZ-01	TCGA-S9-A7IZ-01	10.45	48	-17874		FEMALE	Astrocytoma			WITH TUMOR	G3			Supratentorial, Frontal Lobe	Central nervous system	S9 Dept of Neurosurgery at University of Heidelberg
TCGA-HW-8319-01	TCGA-HW-8319-01	10.46	34	-12557		FEMALE	Astrocytoma	1.2	1.3	WITH TUMOR	G3		0.6	Supratentorial, Frontal Lobe	Central nervous system	HW MSKCC	Brain
TCGA-P5-A781-01	TCGA-P5-A781-01	10.46	34	-12757	86	FEMALE	Astrocytoma			TUMOR FREE	G3			Supratentorial, Temporal Lobe	Central nervous system	P5 Cureline	Brain
TCGA-P5-A72W-01	TCGA-P5-A72W-01	10.48	35	-12848		MALE	Astrocytoma			TUMOR FREE	G3			Supratentorial, Frontal Lobe	Central nervous system	P5 Cureline	Brain
TCGA-DH-A7UU-01	TCGA-DH-A7UU-01	10.48	43	-16037		MALE	Astrocytoma			WITH TUMOR	G3			Supratentorial, Frontal Lobe	Central nervous system	DH University of Florida	Brain
TCGA-E1-A7YH-01	TCGA-E1-A7YH-01	10.5	47	-17465		FEMALE	Astrocytoma			WITH TUMOR	G3			Supratentorial, Temporal Lobe	Central nervous system	E1 Duke
TCGA-CS-6666-01	TCGA-CS-6666-01	10.51	22	-8340		MALE	Astrocytoma			TUMOR FREE	G3			Supratentorial, Parietal Lobe	Central nervous system	CS Thomas Jefferson University	Brain
TCGA-S9-A6U1-01	TCGA-S9-A6U1-01	10.53	22	-8271	260	FEMALE	Astrocytoma			TUMOR FREE	G3			Supratentorial, Frontal Lobe	Central nervous system	S9 Dept of Neurosurgery at University of Heidelberg
TCGA-S9-A7IS-01	TCGA-S9-A7IS-01	10.53	33	-12402	3506	FEMALE	Astrocytoma			WITH TUMOR	G3			Supratentorial, Frontal Lobe	Central nervous system	S9 Dept of Neurosurgery at University of Heidelberg
TCGA-DB-A64X-01	TCGA-DB-A64X-01	10.53	56	-20625		FEMALE	Astrocytoma			TUMOR FREE	G3			Supratentorial, Frontal Lobe	Central nervous system	DB Mayo Clinic - Rochester	Brain
TCGA-CS-5393-01	TCGA-CS-5393-01	10.54	39	-14418		MALE	Astrocytoma	1	1.6	TUMOR FREE	G3		0.3	Supratentorial, Temporal Lobe	Central nervous system	CS Thomas Jefferson University	Brain
TCGA-DU-A7TI-01	TCGA-DU-A7TI-01	10.54	32	-11906	5441	MALE	Astrocytoma			WITH TUMOR	G3			Supratentorial, Frontal Lobe	Central nervous system	DU Henry Ford Hospital	Brain
TCGA-S9-A6WL-01	TCGA-S9-A6WL-01	10.55	52	-19234		MALE	Astrocytoma			WITH TUMOR	G3			Supratentorial, Frontal Lobe	Central nervous system	S9 Dept of Neurosurgery at University of Heidelberg
TCGA-P5-A780-01	TCGA-P5-A780-01	10.56	44	-16161	92	FEMALE	Astrocytoma			TUMOR FREE	G3			Supratentorial, Temporal Lobe	Central nervous system	P5 Cureline	Brain
TCGA-TM-A84B-01	TCGA-TM-A84B-01	10.58	40	-14933		MALE	Astrocytoma			WITH TUMOR	G3			Supratentorial, Parietal Lobe	Central nervous system	TM The University of New South Wales	Brain
TCGA-FG-7636-01	TCGA-FG-7636-01	10.59	48	-17843		MALE	Astrocytoma	0.6	1.1	TUMOR FREE	G3		0.4	Supratentorial, Frontal Lobe	Central nervous system	FG Case Western	Brain
TCGA-E1-A7YE-01	TCGA-E1-A7YE-01	10.61	32	-11971		FEMALE	Astrocytoma			WITH TUMOR	G3			Supratentorial, Frontal Lobe	Central nervous system	E1 Duke
TCGA-FG-8185-01	TCGA-FG-8185-01	10.62	37	-13621		MALE	Astrocytoma			TUMOR FREE	G3			Supratentorial, Frontal Lobe	Central nervous system	FG Case Western	Brain
TCGA-DU-7019-01	TCGA-DU-7019-01	10.6	39	-14279		MALE	Oligoastrocytoma			TUMOR FREE	[Discrepancy]			Supratentorial, Temporal Lobe	Central nervous system	DU Henry Ford Hospital	Brain
TCGA-DU-8166-01	TCGA-DU-8166-01	9.536	29	-10641		FEMALE	Oligoastrocytoma	0.9	0.9	WITH TUMOR	G2		0.5	Supratentorial, Frontal Lobe	Central nervous system	DU Henry Ford Hospital	Brain
TCGA-DU-A6S6-01	TCGA-DU-A6S6-01	9.811	35	-12809		FEMALE	Oligoastrocytoma			TUMOR FREE	G2			Supratentorial, Frontal Lobe	Central nervous system	DU Henry Ford Hospital	Brain
TCGA-TQ-A7RO-01	TCGA-TQ-A7RO-01	9.841	29	-10890	665	MALE	Oligoastrocytoma			WITH TUMOR	G2			Supratentorial, Temporal Lobe	Central nervous system	TQ University of Sao Paulo	Brain
TCGA-TQ-A7RG-01	TCGA-TQ-A7RG-01	10.05	36	-13227	287	MALE	Oligoastrocytoma			WITH TUMOR	G2			Supratentorial, Temporal Lobe	Central nervous system	TQ University of Sao Paulo	Brain
TCGA-P5-A737-01	TCGA-P5-A737-01	10.13	47	-17390		MALE	Oligoastrocytoma			TUMOR FREE	G2			Supratentorial, Frontal Lobe	Central nervous system	P5 Cureline	Brain
TCGA-HT-A74J-01	TCGA-HT-A74J-01	10.15	33	-12393		MALE	Oligoastrocytoma				G2			Supratentorial, Temporal Lobe	Central nervous system	HT Case Western - St Joes
TCGA-FG-7637-01	TCGA-FG-7637-01	10.19	49	-18084		MALE	Oligoastrocytoma	0.6	1	WITH TUMOR	G2		0.5	Supratentorial, Temporal Lobe	Central nervous system	FG Case Western	Brain
TCGA-HT-A74L-01	TCGA-HT-A74L-01	10.21	22	-8240	103	FEMALE	Oligoastrocytoma			WITH TUMOR	G2			Supratentorial, Parietal Lobe	Central nervous system	HT Case Western - St Joes
TCGA-HT-7483-01	TCGA-HT-7483-01	10.24	14	-5267		MALE	Oligoastrocytoma	1	1.3	TUMOR FREE	G2		0.5	Supratentorial, Frontal Lobe	Central nervous system	HT Case Western - St Joes
TCGA-TQ-A7RH-01	TCGA-TQ-A7RH-01	10.24	39	-14524	167	MALE	Oligoastrocytoma			WITH TUMOR	G2			Supratentorial, Temporal Lobe	Central nervous system	TQ University of Sao Paulo	Brain
TCGA-FG-5965-01	TCGA-FG-5965-01	10.26	39	-14249		FEMALE	Oligoastrocytoma	1	1.1	WITH TUMOR	G2		0.8	Supratentorial, Frontal Lobe	Central nervous system	FG Case Western	Brain
TCGA-TM-A7C5-01	TCGA-TM-A7C5-01	10.27	30	-11286	1194	MALE	Oligoastrocytoma			TUMOR FREE	G2			Supratentorial, Parietal Lobe	Central nervous system	TM The University of New South Wales	Brain
TCGA-DB-A4XC-01	TCGA-DB-A4XC-01	10.3	26	-9705		MALE	Oligoastrocytoma			TUMOR FREE	G2			Supratentorial, Temporal Lobe	Central nervous system	DB Mayo Clinic - Rochester	Brain
TCGA-TQ-A7RJ-01	TCGA-TQ-A7RJ-01	10.33	25	-9209	924	FEMALE	Oligoastrocytoma			WITH TUMOR	G2			Supratentorial, Parietal Lobe	Central nervous system	TQ University of Sao Paulo	Brain
TCGA-S9-A7IQ-01	TCGA-S9-A7IQ-01	10.33	45	-16512		FEMALE	Oligoastrocytoma			WITH TUMOR	G2			Supratentorial, Frontal Lobe	Central nervous system	S9 Dept of Neurosurgery at University of Heidelberg
TCGA-HT-7610-01	TCGA-HT-7610-01	10.35	25	-9447		FEMALE	Oligoastrocytoma			TUMOR FREE	G2			Supratentorial, Temporal Lobe	Central nervous system	HT Case Western - St Joes
TCGA-DB-A64Q-01	TCGA-DB-A64Q-01	10.35	31	-11637		FEMALE	Oligoastrocytoma			TUMOR FREE	G2			Supratentorial, Frontal Lobe	Central nervous system	DB Mayo Clinic - Rochester
TCGA-E1-A7YW-01	TCGA-E1-A7YW-01	10.37	28	-10571	4072	MALE	Oligoastrocytoma			WITH TUMOR	G2			Supratentorial, Parietal Lobe	Central nervous system	E1 Duke
TCGA-S9-A6WH-01	TCGA-S9-A6WH-01	10.37	73	-26904	697	FEMALE	Oligoastrocytoma			WITH TUMOR	G2			Supratentorial, Temporal Lobe	Central nervous system	S9 Dept of Neurosurgery at University of Heidelberg
TCGA-TM-A84T-01	TCGA-TM-A84T-01	10.38	19	-6994		MALE	Oligoastrocytoma			WITH TUMOR	G2			Supratentorial, Frontal Lobe	Central nervous system	TM The University of New South Wales	Brain
TCGA-FG-A60K-01	TCGA-FG-A60K-01	10.42	34	-12445		FEMALE	Oligoastrocytoma			WITH TUMOR	G2			Supratentorial, Frontal Lobe	Central nervous system	FG Case Western	Brain
TCGA-QH-A6CZ-01	TCGA-QH-A6CZ-01	10.43	38	-14007	16	MALE	Oligoastrocytoma			TUMOR FREE	G2			Supratentorial, Frontal Lobe	Central nervous system	QH Fondazione-Besta	Brain
TCGA-RY-A845-01	TCGA-RY-A845-01	10.43	40	-14617		FEMALE	Oligoastrocytoma			TUMOR FREE	G2			Supratentorial, Parietal Lobe	Central nervous system	RY University of California San Francisco	Brain
TCGA-FG-8188-01	TCGA-FG-8188-01	10.44	41	-15051		MALE	Oligoastrocytoma	0.6	1.1	WITH TUMOR	G2		0.6	Supratentorial, Temporal Lobe	Central nervous system	FG Case Western	Brain
TCGA-HW-7489-01	TCGA-HW-7489-01	10.45	38	-14201		MALE	Oligoastrocytoma	0.8	1.2	WITH TUMOR	G2		0.3	Supratentorial, Frontal Lobe	Central nervous system	HW MSKCC	Brain
TCGA-HT-8018-01	TCGA-HT-8018-01	10.45	40	-14910		FEMALE	Oligoastrocytoma	0.9	1.3	TUMOR FREE	G2		0.9	Supratentorial, Temporal Lobe	Central nervous system	HT Case Western - St Joes
TCGA-TM-A84L-01	TCGA-TM-A84L-01	10.45	31	-11498		MALE	Oligoastrocytoma			WITH TUMOR	G2			Supratentorial, Temporal Lobe	Central nervous system	TM The University of New South Wales	Brain
TCGA-DB-A4X9-01	TCGA-DB-A4X9-01	10.46	33	-12131	832	FEMALE	Oligoastrocytoma			TUMOR FREE	G2			Supratentorial, Temporal Lobe	Central nervous system	DB Mayo Clinic - Rochester	Brain
TCGA-HT-7611-01	TCGA-HT-7611-01	10.49	36	-13314		MALE	Oligoastrocytoma			TUMOR FREE	G2			Supratentorial, Frontal Lobe	Central nervous system	HT Case Western - St Joes
TCGA-P5-A77X-01	TCGA-P5-A77X-01	10.51	55	-20128		FEMALE	Oligoastrocytoma			TUMOR FREE	G2			Supratentorial, Frontal Lobe	Central nervous system	P5 Cureline	Brain
TCGA-FG-A713-01	TCGA-FG-A713-01	10.51	74	-27232	82	FEMALE	Oligoastrocytoma			TUMOR FREE	G2			Supratentorial, Frontal Lobe	Central nervous system	FG Case Western	Brain
TCGA-DB-A64U-01	TCGA-DB-A64U-01	10.52	38	-14019		FEMALE	Oligoastrocytoma			TUMOR FREE	G2			Supratentorial, Frontal Lobe	Central nervous system	DB Mayo Clinic - Rochester	Brain
TCGA-DB-5280-01	TCGA-DB-5280-01	10.52	43	-15836		MALE	Oligoastrocytoma			TUMOR FREE	G2			Supratentorial, Frontal Lobe	Central nervous system	DB Mayo Clinic - Rochester	Brain
TCGA-DU-7306-01	TCGA-DU-7306-01	10.55	67	-24800		MALE	Oligoastrocytoma	1.1	1.1	WITH TUMOR	G2		0.7	Supratentorial, Temporal Lobe	Central nervous system	DU Henry Ford Hospital	Brain
TCGA-QH-A6X3-01	TCGA-QH-A6X3-01	10.56	27	-10184		MALE	Oligoastrocytoma			TUMOR FREE	G2			Supratentorial, Parietal Lobe	Central nervous system	QH Fondazione-Besta	Brain
TCGA-DB-A4XH-01	TCGA-DB-A4XH-01	10.6	53	-19710		FEMALE	Oligoastrocytoma			TUMOR FREE	G2			Supratentorial, Frontal Lobe	Central nervous system	DB Mayo Clinic - Rochester
TCGA-HT-7873-01	TCGA-HT-7873-01	10.6	29	-10805		MALE	Oligoastrocytoma	0.6	1	WITH TUMOR	G2		0.3	Supratentorial, Frontal Lobe	Central nervous system	HT Case Western - St Joes
TCGA-QH-A6XA-01	TCGA-QH-A6XA-01	10.6	23	-8508		FEMALE	Oligoastrocytoma			TUMOR FREE	G2			Supratentorial, Frontal Lobe	Central nervous system	QH Fondazione-Besta	Brain
TCGA-S9-A7QY-01	TCGA-S9-A7QY-01	10.61	35	-12853	560	FEMALE	Oligoastrocytoma			WITH TUMOR	G2			Supratentorial, Frontal Lobe	Central nervous system	S9 Dept of Neurosurgery at University of Heidelberg
TCGA-DU-5872-01	TCGA-DU-5872-01	10.61	43	-15986		FEMALE	Oligoastrocytoma			WITH TUMOR	G2			Supratentorial, Frontal Lobe	Central nervous system	DU Henry Ford Hospital	Brain
TCGA-DU-7304-02	TCGA-DU-7304-02	9.56	43	-15931	2066	MALE	Oligoastrocytoma			WITH TUMOR	G3			Supratentorial, Frontal Lobe	Central nervous system	DU Henry Ford Hospital	Brain
TCGA-QH-A6CW-01	TCGA-QH-A6CW-01	9.936	43	-15847	24	MALE	Oligoastrocytoma			TUMOR FREE	G3			Supratentorial, Temporal Lobe	Central nervous system	QH Fondazione-Besta	Brain
TCGA-DB-A75K-01	TCGA-DB-A75K-01	9.958	55	-20241		FEMALE	Oligoastrocytoma			TUMOR FREE	G3			Supratentorial, Frontal Lobe	Central nervous system	DB Mayo Clinic - Rochester
TCGA-DU-A7T8-01	TCGA-DU-A7T8-01	10.14	35	-13108	3705	MALE	Oligoastrocytoma			WITH TUMOR	G3			Supratentorial, Frontal Lobe	Central nervous system	DU Henry Ford Hospital	Brain
TCGA-QH-A65X-01	TCGA-QH-A65X-01	10.18	28	-10440	39	FEMALE	Oligoastrocytoma			TUMOR FREE	G3			Supratentorial, Frontal Lobe	Central nervous system	QH Fondazione-Besta	Brain
TCGA-FN-7833-01	TCGA-FN-7833-01	10.23	25	-9228		MALE	Oligoastrocytoma	0.3	0.5	TUMOR FREE	G3		0.2	Supratentorial, Frontal Lobe	Central nervous system	FN nternational Genomics Consortium	Brain
TCGA-QH-A6X4-01	TCGA-QH-A6X4-01	10.24	47	-17258	129	MALE	Oligoastrocytoma			TUMOR FREE	G3			Supratentorial, Temporal Lobe	Central nervous system	QH Fondazione-Besta	Brain
TCGA-TM-A84H-01	TCGA-TM-A84H-01	10.28	44	-16277	627	FEMALE	Oligoastrocytoma			TUMOR FREE	G3			Supratentorial, Frontal Lobe	Central nervous system	TM The University of New South Wales	Brain
TCGA-FG-8186-01	TCGA-FG-8186-01	10.29	42	-15431		FEMALE	Oligoastrocytoma	1	1.5	WITH TUMOR	G3		0.9	Supratentorial, Frontal Lobe	Central nervous system	FG Case Western	Brain
TCGA-HT-7609-01	TCGA-HT-7609-01	10.29	34	-12607		MALE	Oligoastrocytoma			TUMOR FREE	G3			Supratentorial, Frontal Lobe	Central nervous system	HT Case Western - St Joes
TCGA-KT-A74X-01	TCGA-KT-A74X-01	10.31	26	-9590		MALE	Oligoastrocytoma			WITH TUMOR	G3			Supratentorial, Parietal Lobe	Central nervous system	HT Case Western - St Joes
TCGA-HT-7879-01	TCGA-HT-7879-01	10.31	31	-11622		MALE	Oligoastrocytoma			TUMOR FREE	G3			Supratentorial, Temporal Lobe	Central nervous system	HT Case Western - St Joes
TCGA-IK-8125-01	TCGA-IK-8125-01	10.33	62	-22745		MALE	Oligoastrocytoma	0.8	0.9	TUMOR FREE	G3		0.6	Supratentorial, Frontal Lobe	Central nervous system	IK Christiana Healthcare	Brain
TCGA-S9-A7IY-01	TCGA-S9-A7IY-01	10.34	39	-14422	398	MALE	Oligoastrocytoma			WITH TUMOR	G3			Supratentorial, Frontal Lobe	Central nervous system	S9 Dept of Neurosurgery at University of Heidelberg
TCGA-FG-8181-01	TCGA-FG-8181-01	10.36	23	-8642		MALE	Oligoastrocytoma	1.7	1.9	WITH TUMOR	G3		0.7	Supratentorial, Frontal Lobe	Central nervous system	FG Case Western	Brain
TCGA-P5-A730-01	TCGA-P5-A730-01	10.36	22	-8043	161	MALE	Oligoastrocytoma			TUMOR FREE	G3			Supratentorial, Occipital Lobe	Central nervous system	P5 Cureline	Brain
TCGA-DB-A4XE-01	TCGA-DB-A4XE-01	10.37	27	-10150		FEMALE	Oligoastrocytoma			TUMOR FREE	G3			Supratentorial, Temporal Lobe	Central nervous system	DB Mayo Clinic - Rochester
TCGA-HT-8114-01	TCGA-HT-8114-01	10.39	36	-13198		MALE	Oligoastrocytoma	0.8	2	TUMOR FREE	G3		0.6	Supratentorial, Parietal Lobe	Central nervous system	HT Case Western - St Joes	Brain
TCGA-DU-5851-01	TCGA-DU-5851-01	10.44	40	-14802		FEMALE	Oligoastrocytoma	1	1	WITH TUMOR	G3		1	Supratentorial, Temporal Lobe	Central nervous system	DU Henry Ford Hospital	Brain
TCGA-E1-A7YU-01	TCGA-E1-A7YU-01	10.48	42	-15345		MALE	Oligoastrocytoma			WITH TUMOR	G3			Supratentorial, Frontal Lobe	Central nervous system	E1 Duke	Brain
TCGA-HT-7475-01	TCGA-HT-7475-01	10.48	67	-24686		MALE	Oligoastrocytoma			TUMOR FREE	G3			Supratentorial, Frontal Lobe	Central nervous system	HT Case Western - St Joes
TCGA-DH-5143-01	TCGA-DH-5143-01	10.51	30	-11291		MALE	Oligoastrocytoma			WITH TUMOR	G3			Supratentorial, Temporal Lobe	Central nervous system	DH University of Florida	Brain
TCGA-DU-7304-01	TCGA-DU-7304-01	10.53	43	-15931		MALE	Oligoastrocytoma	0.8	1	WITH TUMOR	G3		0.6	Supratentorial, Frontal Lobe	Central nervous system	DU Henry Ford Hospital	Brain
TCGA-DB-5281-01	TCGA-DB-5281-01	10.53	61	-22342		MALE	Oligoastrocytoma	1	2	WITH TUMOR	G3		0.5	Supratentorial, Frontal Lobe	Central nervous system	DB Mayo Clinic - Rochester	Brain
TCGA-E1-A7YV-01	TCGA-E1-A7YV-01	10.53	26	-9546	1314	FEMALE	Oligoastrocytoma			WITH TUMOR	G3			Supratentorial, Frontal Lobe	Central nervous system	E1 Duke
TCGA-S9-A6WP-01	TCGA-S9-A6WP-01	10.53	42	-15658	111	MALE	Oligoastrocytoma			WITH TUMOR	G3			Supratentorial, Frontal Lobe	Central nervous system	S9 Dept of Neurosurgery at University of Heidelberg
TCGA-DU-8163-01	TCGA-DU-8163-01	10.54	29	-10824		MALE	Oligoastrocytoma	1	1	WITH TUMOR	G3		0.6	Supratentorial, Temporal Lobe	Central nervous system	DU Henry Ford Hospital	Brain
TCGA-QH-A6CY-01	TCGA-QH-A6CY-01	10.55	38	-14140	18	MALE	Oligoastrocytoma			WITH TUMOR	G3			Supratentorial, Frontal Lobe	Central nervous system	QH Fondazione-Besta	Brain
TCGA-DB-5275-01	TCGA-DB-5275-01	10.56	36	-13371		MALE	Oligoastrocytoma			TUMOR FREE	G3			Supratentorial, Temporal Lobe	Central nervous system	DB Mayo Clinic - Rochester
TCGA-DU-6403-01	TCGA-DU-6403-01	10.59	60	-22031		FEMALE	Oligoastrocytoma			WITH TUMOR	G3			Supratentorial, Temporal Lobe	Central nervous system	DU Henry Ford Hospital	Brain
TCGA-TQ-A7RQ-01	TCGA-TQ-A7RQ-01	9.807	38	-14187	504	FEMALE	Oligodendroglioma			TUMOR FREE	G2			Supratentorial, Temporal Lobe	Central nervous system	TQ University of Sao Paulo	Brain
TCGA-RY-A83X-01	TCGA-RY-A83X-01	9.942	46	-16911		FEMALE	Oligodendroglioma			TUMOR FREE	G2			Supratentorial, Frontal Lobe	Central nervous system	RY University of California San Francisco	Brain
TCGA-TQ-A7RN-01	TCGA-TQ-A7RN-01	9.981	32	-11823		MALE	Oligodendroglioma			WITH TUMOR	G2			Supratentorial, Temporal Lobe	Central nervous system	TQ University of Sao Paulo	Brain
TCGA-QH-A86X-01	TCGA-QH-A86X-01	9.981	33	-12385	7	MALE	Oligodendroglioma			TUMOR FREE	G2			Supratentorial, Frontal Lobe	Central nervous system	QH Fondazione-Besta	Brain
TCGA-HT-7875-01	TCGA-HT-7875-01	9.983	56	-20613		MALE	Oligodendroglioma	1.1	2.4	TUMOR FREE	G2		0.6	Supratentorial, Frontal Lobe	Central nervous system	HT Case Western - St Joes
TCGA-S9-A7R1-01	TCGA-S9-A7R1-01	9.986	35	-12828		MALE	Oligodendroglioma			WITH TUMOR	G2			Supratentorial, Frontal Lobe	Central nervous system	S9 Dept of Neurosurgery at University of Heidelberg
TCGA-DU-A6S3-01	TCGA-DU-A6S3-01	9.991	60	-22038		MALE	Oligodendroglioma			TUMOR FREE	G2			Supratentorial, Frontal Lobe	Central nervous system	DU Henry Ford Hospital	Brain
TCGA-DU-A6S2-01	TCGA-DU-A6S2-01	10.01	37	-13597	153	FEMALE	Oligodendroglioma			TUMOR FREE	G2			Supratentorial, Frontal Lobe	Central nervous system	DU Henry Ford Hospital	Brain
TCGA-TQ-A7RU-01	TCGA-TQ-A7RU-01	10.01	51	-18990		MALE	Oligodendroglioma			WITH TUMOR	G2			Supratentorial, Temporal Lobe	Central nervous system	TQ University of Sao Paulo	Brain
TCGA-FG-A6J1-01	TCGA-FG-A6J1-01	10.03	44	-16106	91	FEMALE	Oligodendroglioma			WITH TUMOR	G2			Supratentorial, Not Otherwise Specified	Central nervous system	FG Case Western	Brain
TCGA-S9-A7QZ-01	TCGA-S9-A7QZ-01	10.04	41	-15300	368	MALE	Oligodendroglioma			WITH TUMOR	G2			Supratentorial, Frontal Lobe	Central nervous system	S9 Dept of Neurosurgery at University of Heidelberg
TCGA-HT-8012-01	TCGA-HT-8012-01	10.06	30	-11295		FEMALE	Oligodendroglioma			WITH TUMOR	G2			Supratentorial, Temporal Lobe	Central nervous system	HT Case Western - St Joes
TCGA-S9-A6U2-01	TCGA-S9-A6U2-01	10.06	48	-17800	430	FEMALE	Oligodendroglioma			WITH TUMOR	G2			Supratentorial, Frontal Lobe	Central nervous system	S9 Dept of Neurosurgery at University of Heidelberg
TCGA-TQ-A7RS-01	TCGA-TQ-A7RS-01	10.1	25	-9172	398	FEMALE	Oligodendroglioma			TUMOR FREE	G2			Supratentorial, Frontal Lobe	Central nervous system	TQ University of Sao Paulo	Brain
TCGA-TQ-A7RI-01	TCGA-TQ-A7RI-01	10.11	37	-13799		FEMALE	Oligodendroglioma			TUMOR FREE	G2			Supratentorial, Parietal Lobe	Central nervous system	TQ University of Sao Paulo	Brain
TCGA-RY-A83Y-01	TCGA-RY-A83Y-01	10.15	45	-16470	485	MALE	Oligodendroglioma			TUMOR FREE	G2			Supratentorial, Parietal Lobe	Central nervous system	RY University of California San Francisco	Brain
TCGA-VM-A8CE-01	TCGA-VM-A8CE-01	10.16	25	-9363		MALE	Oligodendroglioma			WITH TUMOR	G2			Supratentorial, Frontal Lobe	Central nervous system	VM Huntsman Cancer Institute	Brain
TCGA-DB-5278-01	TCGA-DB-5278-01	10.17	17	-6480		MALE	Oligodendroglioma	1.3	1.8	WITH TUMOR	G2		0.4	Supratentorial, Frontal Lobe	Central nervous system	DB Mayo Clinic - Rochester	Brain
TCGA-DU-8164-01	TCGA-DU-8164-01	10.18	51	-18735		MALE	Oligodendroglioma	0.8	0.8	TUMOR FREE	G2		0.6	Supratentorial, Frontal Lobe	Central nervous system	DU Henry Ford Hospital	Brain
TCGA-CS-6668-01	TCGA-CS-6668-01	10.19	57	-20836		FEMALE	Oligodendroglioma	0.6	1	WITH TUMOR	G2		0.5	Supratentorial, Frontal Lobe	Central nervous system	CS Thomas Jefferson University	Brain
TCGA-DB-A64R-01	TCGA-DB-A64R-01	10.2	24	-8947	436	FEMALE	Oligodendroglioma			TUMOR FREE	G2			Supratentorial, Frontal Lobe	Central nervous system	DB Mayo Clinic - Rochester
TCGA-HW-7491-01	TCGA-HW-7491-01	10.21	35	-12874		MALE	Oligodendroglioma	0.7	1.1	WITH TUMOR	G2		0.5	Supratentorial, Frontal Lobe	Central nervous system	HW MSKCC	Brain
TCGA-W9-A837-01	TCGA-W9-A837-01	10.21	47			MALE	Oligodendroglioma			WITH TUMOR	G2			Supratentorial, Frontal Lobe	Central nervous system	S9 Dept of Neurosurgery at University of Heidelberg
TCGA-DU-6401-01	TCGA-DU-6401-01	10.23	31	-11595		FEMALE	Oligodendroglioma	0.8	1.5	WITH TUMOR	G2		0.5	Supratentorial, Frontal Lobe	Central nervous system	DU Henry Ford Hospital	Brain
TCGA-S9-A6WE-01	TCGA-S9-A6WE-01	10.23	34	-12488	3434	MALE	Oligodendroglioma			WITH TUMOR	G2			Supratentorial, Frontal Lobe	Central nervous system	S9 Dept of Neurosurgery at University of Heidelberg
TCGA-DU-5874-01	TCGA-DU-5874-01	10.24	62	-22847		FEMALE	Oligodendroglioma	1	1	TUMOR FREE	G2		0.7	Supratentorial, Frontal Lobe	Central nervous system	DU Henry Ford Hospital	Brain
TCGA-HT-7480-01	TCGA-HT-7480-01	10.24	33	-12291		MALE	Oligodendroglioma	1.2	1.8	WITH TUMOR	G2		0.3	Supratentorial, Frontal Lobe	Central nervous system	HT Case Western - St Joes
TCGA-FG-7641-01	TCGA-FG-7641-01	10.24	31	-11357		MALE	Oligodendroglioma			TUMOR FREE	G2			Supratentorial, Frontal Lobe	Central nervous system	FG Case Western	Brain
TCGA-R8-A73M-01	TCGA-R8-A73M-01	10.24	48	-17610		FEMALE	Oligodendroglioma				G2			Supratentorial, Parietal Lobe	Central nervous system	RY University of California San Francisco	Brain
TCGA-P5-A5ET-01	TCGA-P5-A5ET-01	10.27	27	-10027	98	MALE	Oligodendroglioma			TUMOR FREE	G2			Supratentorial, Frontal Lobe	Central nervous system	P5 Cureline	Brain
TCGA-TQ-A7RW-01	TCGA-TQ-A7RW-01	10.27	32	-11804	1022	MALE	Oligodendroglioma			WITH TUMOR	G2			Supratentorial, Temporal Lobe	Central nervous system	TQ University of Sao Paulo	Brain
TCGA-DU-5870-01	TCGA-DU-5870-01	10.28	34	-12764		FEMALE	Oligodendroglioma			WITH TUMOR	G2			Supratentorial, Temporal Lobe	Central nervous system	DU Henry Ford Hospital	Brain
TCGA-QH-A65Z-01	TCGA-QH-A65Z-01	10.32	54	-19921	19	MALE	Oligodendroglioma			TUMOR FREE	G2			Supratentorial, Frontal Lobe	Central nervous system	QH Fondazione-Besta	Brain
TCGA-DH-A7US-01	TCGA-DH-A7US-01	10.33	50	-18429		MALE	Oligodendroglioma			WITH TUMOR	G2			Supratentorial, Temporal Lobe	Central nervous system	DH University of Florida	Brain
TCGA-CS-5390-01	TCGA-CS-5390-01	10.35	47	-17460		FEMALE	Oligodendroglioma			WITH TUMOR	G2			Supratentorial, Parietal Lobe	Central nervous system	CS Thomas Jefferson University	Brain
TCGA-HT-7877-01	TCGA-HT-7877-01	10.36	20	-7581		FEMALE	Oligodendroglioma	0.8	1.2	TUMOR FREE	G2		0.6	Supratentorial, Frontal Lobe	Central nervous system	HT Case Western - St Joes
TCGA-HT-7695-01	TCGA-HT-7695-01	10.36	29	-10827		FEMALE	Oligodendroglioma	0.9	1.8	TUMOR FREE	G2		0.7	Supratentorial, Frontal Lobe	Central nervous system	HT Case Western - St Joes
TCGA-FG-8182-01	TCGA-FG-8182-01	10.37	35	-12972		MALE	Oligodendroglioma			WITH TUMOR	G2			Supratentorial, Frontal Lobe	Central nervous system	FG Case Western	Brain
TCGA-S9-A7J1-01	TCGA-S9-A7J1-01	10.37	43	-15926		MALE	Oligodendroglioma			WITH TUMOR	G2			Supratentorial, Temporal Lobe	Central nervous system	S9 Dept of Neurosurgery at University of Heidelberg
TCGA-DU-5849-01	TCGA-DU-5849-01	10.39	48	-17663		MALE	Oligodendroglioma			TUMOR FREE	G2			Supratentorial, Frontal Lobe	Central nervous system	DU Henry Ford Hospital	Brain
TCGA-FG-A710-01	TCGA-FG-A710-01	10.4	50	-18415	823	FEMALE	Oligodendroglioma			WITH TUMOR	G2			Supratentorial, Frontal Lobe	Central nervous system	FG Case Western	Brain
TCGA-HT-8010-01	TCGA-HT-8010-01	10.4	64	-23680		FEMALE	Oligodendroglioma			TUMOR FREE	G2			Supratentorial, Frontal Lobe	Central nervous system	HT Case Western - St Joes
TCGA-DU-6400-01	TCGA-DU-6400-01	10.41	66	-24122		FEMALE	Oligodendroglioma	0.6	1	WITH TUMOR	G2		0.5	Supratentorial, Temporal Lobe	Central nervous system	DU Henry Ford Hospital	Brain
TCGA-HW-7495-01	TCGA-HW-7495-01	10.41	45	-16460		FEMALE	Oligodendroglioma			WITH TUMOR	G2			Supratentorial, Frontal Lobe	Central nervous system	HW MSKCC	Brain
TCGA-DU-5870-02	TCGA-DU-5870-02	10.42	34	-12764	6469	FEMALE	Oligodendroglioma			WITH TUMOR	G2			Supratentorial, Temporal Lobe	Central nervous system	DU Henry Ford Hospital	Brain
TCGA-F6-A8O3-01	TCGA-F6-A8O3-01	10.43	34	-12578		MALE	Oligodendroglioma			TUMOR FREE	G2			Supratentorial, Frontal Lobe	Central nervous system	F6 Asterand	Brain
TCGA-TQ-A8XE-01	TCGA-TQ-A8XE-01	10.43	42	-15629	1308	FEMALE	Oligodendroglioma			WITH TUMOR	G2			Supratentorial, Temporal Lobe	Central nervous system	TQ University of Sao Paulo	Brain
TCGA-DH-A66F-01	TCGA-DH-A66F-01	10.44	49	-18193	166	MALE	Oligodendroglioma			TUMOR FREE	G2			Supratentorial, Frontal Lobe	Central nervous system	DH University of Florida	Brain
TCGA-HT-8107-01	TCGA-HT-8107-01	10.45	62	-22880		MALE	Oligodendroglioma	0.6	1	TUMOR FREE	G2		0.4	Supratentorial, Parietal Lobe	Central nervous system	HT Case Western - St Joes
TCGA-HT-7693-01	TCGA-HT-7693-01	10.45	51	-18956		FEMALE	Oligodendroglioma	1	1.1	TUMOR FREE	G2		0.7	Supratentorial, Frontal Lobe	Central nervous system	HT Case Western - St Joes
TCGA-FG-A6IZ-01	TCGA-FG-A6IZ-01	10.45	60	-22275	157	MALE	Oligodendroglioma			TUMOR FREE	G2			Supratentorial, Not Otherwise Specified	Central nervous system	FG Case Western	Brain
TCGA-DU-7009-01	TCGA-DU-7009-01	10.46	32	-11854		FEMALE	Oligodendroglioma	1	1	WITH TUMOR	G2		0.5	Supratentorial, Frontal Lobe	Central nervous system	DU Henry Ford Hospital	Brain
TCGA-E1-5318-01	TCGA-E1-5318-01	10.48	42	-15372		FEMALE	Oligodendroglioma	0.5	0.7	WITH TUMOR	G2		0.2	Supratentorial, Frontal Lobe	Central nervous system	E1 Duke
TCGA-HT-8108-01	TCGA-HT-8108-01	10.48	26	-9539		FEMALE	Oligodendroglioma	0.6	0.7	TUMOR FREE	G2		0.3	Supratentorial, Parietal Lobe	Central nervous system	HT Case Western - St Joes
TCGA-HW-7487-01	TCGA-HW-7487-01	10.48	39	-14535		MALE	Oligodendroglioma	0.9	0.9	WITH TUMOR	G2		0.2	Supratentorial, Frontal Lobe	Central nervous system	HW MSKCC	Brain
TCGA-HT-7605-01	TCGA-HT-7605-01	10.49	38	-13892		MALE	Oligodendroglioma				G2			Supratentorial, Frontal Lobe	Central nervous system	HT Case Western - St Joes
TCGA-R8-A6MK-01	TCGA-R8-A6MK-01	10.49	40	-14716	2841	MALE	Oligodendroglioma				G2			Supratentorial, Frontal Lobe	Central nervous system	RY University of California San Francisco	Brain
TCGA-S9-A6TY-01	TCGA-S9-A6TY-01	10.49	50	-18564		MALE	Oligodendroglioma			WITH TUMOR	G2			Supratentorial, Temporal Lobe	Central nervous system	S9 Dept of Neurosurgery at University of Heidelberg
TCGA-S9-A6UB-01	TCGA-S9-A6UB-01	10.49	52	-19223	3073	MALE	Oligodendroglioma			TUMOR FREE	G2			Supratentorial, Frontal Lobe	Central nervous system	S9 Dept of Neurosurgery at University of Heidelberg
TCGA-DU-7294-01	TCGA-DU-7294-01	10.5	53	-19616		FEMALE	Oligodendroglioma	1	1.1	TUMOR FREE	G2		0.9	Supratentorial, Frontal Lobe	Central nervous system	DU Henry Ford Hospital	Brain
TCGA-HT-7689-01	TCGA-HT-7689-01	10.5	58	-21331		FEMALE	Oligodendroglioma	1	1.2	TUMOR FREE	G2		0.7	Supratentorial, Frontal Lobe	Central nervous system	HT Case Western - St Joes
TCGA-E1-A7YY-01	TCGA-E1-A7YY-01	10.5	27	-9867	5621	FEMALE	Oligodendroglioma			WITH TUMOR	G2			Supratentorial, Frontal Lobe	Central nervous system	E1 Duke
TCGA-FG-8189-01	TCGA-FG-8189-01	10.5	33	-12384		FEMALE	Oligodendroglioma			WITH TUMOR	G2			Supratentorial, Temporal Lobe	Central nervous system	FG Case Western	Brain
TCGA-P5-A5F0-01	TCGA-P5-A5F0-01	10.5	33	-12157	62	MALE	Oligodendroglioma			TUMOR FREE	G2			Supratentorial, Frontal Lobe	Central nervous system	P5 Cureline	Brain
TCGA-QH-A6X9-01	TCGA-QH-A6X9-01	10.51	73	-26992	22	FEMALE	Oligodendroglioma				G2			Supratentorial, Temporal Lobe	Central nervous system	QH Fondazione-Besta	Brain
TCGA-FG-A70Y-01	TCGA-FG-A70Y-01	10.53	20	-7421	804	FEMALE	Oligodendroglioma			WITH TUMOR	G2			Supratentorial, Temporal Lobe	Central nervous system	FG Case Western	Brain
TCGA-HT-7472-01	TCGA-HT-7472-01	10.53	38	-13968		MALE	Oligodendroglioma			TUMOR FREE	G2			Supratentorial, Frontal Lobe	Central nervous system	HT Case Western - St Joes
TCGA-FG-A4MT-01	TCGA-FG-A4MT-01	10.54	27	-10082		FEMALE	Oligodendroglioma			TUMOR FREE	G2			Supratentorial, Temporal Lobe	Central nervous system	FG Case Western	Brain
TCGA-HW-8322-01	TCGA-HW-8322-01	10.55	39	-14548		MALE	Oligodendroglioma	0.9	1.5	WITH TUMOR	G2		0.5	Supratentorial, Frontal Lobe	Central nervous system	HW MSKCC	Brain
TCGA-DU-A7TG-01	TCGA-DU-A7TG-01	10.58	40	-14671	1804	MALE	Oligodendroglioma				G2			Supratentorial, Frontal Lobe	Central nervous system	DU Henry Ford Hospital	Brain
TCGA-CS-6669-01	TCGA-CS-6669-01	10.59	26	-9809		FEMALE	Oligodendroglioma			WITH TUMOR	G2			Supratentorial, Temporal Lobe	Central nervous system	CS Thomas Jefferson University	Brain
TCGA-HT-A615-01	TCGA-HT-A615-01	10.59	38	-13892	300	FEMALE	Oligodendroglioma			TUMOR FREE	G2			Supratentorial, Temporal Lobe	Central nervous system	HT Case Western - St Joes
TCGA-HT-8113-01	TCGA-HT-8113-01	10.59	49	-18173		FEMALE	Oligodendroglioma			TUMOR FREE	G2			Supratentorial, Frontal Lobe	Central nervous system	HT Case Western - St Joes
TCGA-TM-A84R-01	TCGA-TM-A84R-01	10.6	46	-16843	346	MALE	Oligodendroglioma			TUMOR FREE	G2			Supratentorial, Frontal Lobe	Central nervous system	TM The University of New South Wales	Brain
TCGA-DU-6399-01	TCGA-DU-6399-01	10.6	54	-19906		MALE	Oligodendroglioma			WITH TUMOR	G2			Supratentorial, Temporal Lobe	Central nervous system	DU Henry Ford Hospital	Brain
TCGA-FG-A711-01	TCGA-FG-A711-01	10.61	33	-12248	1265	FEMALE	Oligodendroglioma			WITH TUMOR	G2			Supratentorial, Frontal Lobe	Central nervous system	FG Case Western	Brain
TCGA-S9-A7J2-01	TCGA-S9-A7J2-01	9.552	25	-9345	194	MALE	Oligodendroglioma			WITH TUMOR	G3			Supratentorial, Frontal Lobe	Central nervous system	S9 Dept of Neurosurgery at University of Heidelberg
TCGA-E1-A7YO-01	TCGA-E1-A7YO-01	9.889	45	-16770	6582	MALE	Oligodendroglioma			WITH TUMOR	G3			Supratentorial, Frontal Lobe	Central nervous system	E1 Duke	Brain
TCGA-S9-A6TX-01	TCGA-S9-A6TX-01	9.949	46	-17025	776	MALE	Oligodendroglioma			WITH TUMOR	G3			Supratentorial, Temporal Lobe	Central nervous system	S9 Dept of Neurosurgery at University of Heidelberg
TCGA-S9-A7J3-01	TCGA-S9-A7J3-01	10.07	52	-19056	182	FEMALE	Oligodendroglioma			WITH TUMOR	G3			Supratentorial, Parietal Lobe	Central nervous system	S9 Dept of Neurosurgery at University of Heidelberg
TCGA-HT-7677-01	TCGA-HT-7677-01	10.1	53	-19610		MALE	Oligodendroglioma	1.1	2.1	WITH TUMOR	G3		0.7	Supratentorial, Frontal Lobe	Central nervous system	HT Case Western - St Joes
TCGA-HT-7468-01	TCGA-HT-7468-01	10.11	30	-11209		MALE	Oligodendroglioma			TUMOR FREE	G3			Supratentorial, Parietal Lobe	Central nervous system	HT Case Western - St Joes
TCGA-R8-A6ML-01	TCGA-R8-A6ML-01	10.12	52	-19185	2735	MALE	Oligodendroglioma				G3			Supratentorial, Frontal Lobe	Central nervous system	R8 MD Anderson	Brain
TCGA-TM-A84G-01	TCGA-TM-A84G-01	10.12	54	-20014		FEMALE	Oligodendroglioma			TUMOR FREE	G3			Supratentorial, Frontal Lobe	Central nervous system	TM The University of New South Wales	Brain
TCGA-E1-5311-01	TCGA-E1-5311-01	10.17	31	-11332		MALE	Oligodendroglioma	0.6	1.1	WITH TUMOR	G3		0.2	Supratentorial, Temporal Lobe	Central nervous system	E1 Duke
TCGA-TM-A84M-01	TCGA-TM-A84M-01	10.17	40	-14660	455	MALE	Oligodendroglioma			TUMOR FREE	G3			Supratentorial, Frontal Lobe	Central nervous system	TM The University of New South Wales	Brain
TCGA-FG-7638-01	TCGA-FG-7638-01	10.21	31	-11528		FEMALE	Oligodendroglioma	1	1.3	WITH TUMOR	G3		0.6	Supratentorial, Frontal Lobe	Central nervous system	FG Case Western	Brain
TCGA-RY-A840-01	TCGA-RY-A840-01	10.21	47	-17501	444	MALE	Oligodendroglioma			WITH TUMOR	G3			Supratentorial, Temporal Lobe	Central nervous system	RY University of California San Francisco	Brain
TCGA-QH-A6X8-01	TCGA-QH-A6X8-01	10.21	56	-20771	54	FEMALE	Oligodendroglioma			WITH TUMOR	G3			Supratentorial, Frontal Lobe	Central nervous system	QH Fondazione-Besta	Brain
TCGA-DU-6397-01	TCGA-DU-6397-01	10.25	45	-16695		MALE	Oligodendroglioma	1	1.3	WITH TUMOR	G3		0.8	Supratentorial, Temporal Lobe	Central nervous system	DU Henry Ford Hospital	Brain
TCGA-VM-A8CB-01	TCGA-VM-A8CB-01	10.28	33	-12340		MALE	Oligodendroglioma			TUMOR FREE	G3			Supratentorial, Frontal Lobe	Central nervous system	VM Huntsman Cancer Institute	Brain
TCGA-E1-A7YS-01	TCGA-E1-A7YS-01	10.28	71	-26159	2123	MALE	Oligodendroglioma			WITH TUMOR	G3			Supratentorial, Temporal Lobe	Central nervous system	E1 Duke
TCGA-HT-7471-01	TCGA-HT-7471-01	10.29	37	-13564		FEMALE	Oligodendroglioma	0.9	1.5	TUMOR FREE	G3		0.4	Supratentorial, Temporal Lobe	Central nervous system	HT Case Western - St Joes	Brain
TCGA-CS-6670-01	TCGA-CS-6670-01	10.3	43	-16066		MALE	Oligodendroglioma			WITH TUMOR	G3			Supratentorial, Temporal Lobe	Central nervous system	CS Thomas Jefferson University	Brain
TCGA-HT-A74K-01	TCGA-HT-A74K-01	10.3	58	-21189	293	FEMALE	Oligodendroglioma			TUMOR FREE	G3			Supratentorial, Frontal Lobe	Central nervous system	HT Case Western - St Joes
TCGA-DU-6410-01	TCGA-DU-6410-01	10.31	56	-20567		MALE	Oligodendroglioma	0.8	0.8	WITH TUMOR	G3		0.6	Supratentorial, Frontal Lobe	Central nervous system	DU Henry Ford Hospital	Brain
TCGA-DB-A4XG-01	TCGA-DB-A4XG-01	10.32	34	-12550	2137	MALE	Oligodendroglioma			WITH TUMOR	G3			Supratentorial, Frontal Lobe	Central nervous system	DB Mayo Clinic - Rochester	Brain
TCGA-DU-6393-01	TCGA-DU-6393-01	10.33	66	-24282		MALE	Oligodendroglioma	0.7	0.7		G3		0.5	Supratentorial, Occipital Lobe	Central nervous system	DU Henry Ford Hospital	Brain
TCGA-HT-8105-01	TCGA-HT-8105-01	10.33	54	-20041		MALE	Oligodendroglioma	1	1.6	TUMOR FREE	G3		1	Supratentorial, Frontal Lobe	Central nervous system	HT Case Western - St Joes
TCGA-DU-7302-01	TCGA-DU-7302-01	10.34	48	-17656		FEMALE	Oligodendroglioma	0.9	1	WITH TUMOR	G3		0.7	Supratentorial, Frontal Lobe	Central nervous system	DU Henry Ford Hospital	Brain
TCGA-TM-A84J-01	TCGA-TM-A84J-01	10.35	63	-23091	415	MALE	Oligodendroglioma			WITH TUMOR	G3			Supratentorial, Occipital Lobe	Central nervous system	TM The University of New South Wales	Brain
TCGA-P5-A72Z-01	TCGA-P5-A72Z-01	10.35	64	-23482	178	FEMALE	Oligodendroglioma			TUMOR FREE	G3			Supratentorial, Temporal Lobe	Central nervous system	P5 Cureline	Brain
TCGA-VW-A7QS-01	TCGA-VW-A7QS-01	10.38	35	-12820		FEMALE	Oligodendroglioma			WITH TUMOR	G3			Supratentorial, Frontal Lobe	Central nervous system	VM Huntsman Cancer Institute	Brain
TCGA-TM-A84S-01	TCGA-TM-A84S-01	10.4	36	-13424		MALE	Oligodendroglioma			TUMOR FREE	G3			Supratentorial, Frontal Lobe	Central nervous system	TM The University of New South Wales	Brain
TCGA-DU-6394-01	TCGA-DU-6394-01	10.41	53	-19541		MALE	Oligodendroglioma			WITH TUMOR	G3			Supratentorial, Frontal Lobe	Central nervous system	DU Henry Ford Hospital	Brain
TCGA-CS-5396-01	TCGA-CS-5396-01	10.42	53	-19399		FEMALE	Oligodendroglioma	0.9	1.6	WITH TUMOR	G3		0.8	Supratentorial, Frontal Lobe	Central nervous system	CS Thomas Jefferson University	Brain
TCGA-DU-7018-01	TCGA-DU-7018-01	10.43	57	-21019		FEMALE	Oligodendroglioma	1	1	WITH TUMOR	G3		0.5	Supratentorial, Frontal Lobe	Central nervous system	DU Henry Ford Hospital	Brain
TCGA-HT-7687-01	TCGA-HT-7687-01	10.44	74	-27186		MALE	Oligodendroglioma			TUMOR FREE	G3			Supratentorial, Frontal Lobe	Central nervous system	HT Case Western - St Joes
TCGA-DU-6397-02	TCGA-DU-6397-02	10.45	45	-16695	5830	MALE	Oligodendroglioma			WITH TUMOR	G3			Supratentorial, Temporal Lobe	Central nervous system	DU Henry Ford Hospital	Brain
TCGA-HT-7688-01	TCGA-HT-7688-01	10.46	59	-21844		MALE	Oligodendroglioma	0.9	2.3	TUMOR FREE	G3		0.6	Supratentorial, Frontal Lobe	Central nervous system	HT Case Western - St Joes
TCGA-HT-7856-01	TCGA-HT-7856-01	10.48	35	-13145		MALE	Oligodendroglioma			TUMOR FREE	G3			Supratentorial, Frontal Lobe	Central nervous system	HT Case Western - St Joes
TCGA-DU-8168-01	TCGA-DU-8168-01	10.48	55	-20136		FEMALE	Oligodendroglioma			TUMOR FREE	G3			Supratentorial, Frontal Lobe	Central nervous system	DU Henry Ford Hospital	Brain
TCGA-HT-8109-01	TCGA-HT-8109-01	10.49	64	-23486		MALE	Oligodendroglioma	0.8	1.1	TUMOR FREE	G3		0.6	Supratentorial, Frontal Lobe	Central nervous system	HT Case Western - St Joes	Brain
TCGA-DH-5144-01	TCGA-DH-5144-01	10.49	56	-20558		FEMALE	Oligodendroglioma			TUMOR FREE	G3			Supratentorial, Frontal Lobe	Central nervous system	DH University of Florida	Brain
TCGA-DH-5141-01	TCGA-DH-5141-01	10.5	32	-11846		MALE	Oligodendroglioma	0.3	0.6		G3		0.2	Supratentorial, Frontal Lobe	Central nervous system	DH University of Florida	Brain
TCGA-DU-7309-01	TCGA-DU-7309-01	10.51	41	-15197		FEMALE	Oligodendroglioma			WITH TUMOR	G3			Supratentorial, Frontal Lobe	Central nervous system	DU Henry Ford Hospital	Brain
TCGA-DU-6404-01	TCGA-DU-6404-01	10.53	24	-9021		FEMALE	Oligodendroglioma	0.6	1	WITH TUMOR	G3		0.3	Supratentorial, Frontal Lobe	Central nervous system	DU Henry Ford Hospital	Brain
TCGA-HT-7874-01	TCGA-HT-7874-01	10.54	41	-15045		FEMALE	Oligodendroglioma	1	2	TUMOR FREE	G3		0.6	Supratentorial, Frontal Lobe	Central nervous system	HT Case Western - St Joes
TCGA-QH-A65R-01	TCGA-QH-A65R-01	10.55	38	-14073		FEMALE	Oligodendroglioma			WITH TUMOR	G3			Supratentorial, Frontal Lobe	Central nervous system	QH Fondazione-Besta	Brain
TCGA-FG-5962-01	TCGA-FG-5962-01	10.56	54	-19818		MALE	Oligodendroglioma	1	1	WITH TUMOR	G3		0.5	Supratentorial, Occipital Lobe	Central nervous system	FG Case Western	Brain

## Sheet: LGG_high
sample	samples	C20orf30	age_at_initial_pathologic_diagnosis	days_to_birth	days_to_collection	gender	histological_type	intermediate_dimension	longest_dimension	person_neoplasm_cancer_status	neoplasm_histologic_grade	new_neoplasm_event_type	shortest_dimension	tumor_location	tumor_tissue_site	tissue_source_site	_primary_site
TCGA-HT-7604-01	TCGA-HT-7604-01	10.68	50	-18443		MALE	Astrocytoma	1.2	1.7	TUMOR FREE	G2		0.4	Supratentorial, Frontal Lobe	Central nervous system	HT Case Western - St Joes
TCGA-HT-8015-01	TCGA-HT-8015-01	10.69	21	-7760	1483	MALE	Astrocytoma			TUMOR FREE	G2			Supratentorial, Temporal Lobe	Central nervous system	HT Case Western - St Joes
TCGA-HT-7476-01	TCGA-HT-7476-01	10.69	26	-9614		MALE	Astrocytoma			TUMOR FREE	G2			Supratentorial, Temporal Lobe	Central nervous system	HT Case Western - St Joes
TCGA-WH-A86K-01	TCGA-WH-A86K-01	10.7	65	-24055	112	MALE	Astrocytoma			WITH TUMOR	G2			Supratentorial, Frontal Lobe	Central nervous system	WH Greenville Health System	Brain
TCGA-FG-6691-01	TCGA-FG-6691-01	10.71	23	-8403		FEMALE	Astrocytoma	0.9	1.1	WITH TUMOR	G2		0.9	Supratentorial, Temporal Lobe	Central nervous system	FG Case Western	Brain
TCGA-TM-A84Q-01	TCGA-TM-A84Q-01	10.71	31	-11668	592	MALE	Astrocytoma			TUMOR FREE	G2			Supratentorial, Temporal Lobe	Central nervous system	TM The University of New South Wales	Brain
TCGA-HW-7490-01	TCGA-HW-7490-01	10.75	41	-15092		MALE	Astrocytoma			WITH TUMOR	G2			Supratentorial, Occipital Lobe	Central nervous system	HW MSKCC	Brain
TCGA-CS-4938-01	TCGA-CS-4938-01	10.76	31	-11509		FEMALE	Astrocytoma	0.6	1.5	WITH TUMOR	G2		0.3	Supratentorial, Frontal Lobe	Central nervous system	CS Thomas Jefferson University	Brain
TCGA-HT-7485-01	TCGA-HT-7485-01	10.77	42	-15589		MALE	Astrocytoma	1.1	1.6	TUMOR FREE	G2		0.7	Supratentorial, Parietal Lobe	Central nervous system	HT Case Western - St Joes
TCGA-HW-7493-01	TCGA-HW-7493-01	10.79	40	-14767		FEMALE	Astrocytoma	0.8	1.1	WITH TUMOR	G2		0.7	Supratentorial, Temporal Lobe	Central nervous system	HW MSKCC
TCGA-HW-A5KM-01	TCGA-HW-A5KM-01	10.8	35	-12845	139	MALE	Astrocytoma			WITH TUMOR	G2			Supratentorial, Frontal Lobe	Central nervous system	HW MSKCC
TCGA-P5-A5F2-01	TCGA-P5-A5F2-01	10.8	36	-13396	48	FEMALE	Astrocytoma			WITH TUMOR	G2			Supratentorial, Frontal Lobe	Central nervous system	P5 Cureline	Brain
TCGA-HT-7606-01	TCGA-HT-7606-01	10.81	30	-11233		FEMALE	Astrocytoma			TUMOR FREE	G2			Supratentorial, Frontal Lobe	Central nervous system	HT Case Western - St Joes
TCGA-HT-7607-01	TCGA-HT-7607-01	10.81	61	-22585		FEMALE	Astrocytoma			WITH TUMOR	G2			Supratentorial, Frontal Lobe	Central nervous system	HT Case Western - St Joes
TCGA-FG-6689-01	TCGA-FG-6689-01	10.84	30	-11312		MALE	Astrocytoma	1	1	WITH TUMOR	G2		1	Supratentorial, Frontal Lobe	Central nervous system	FG Case Western	Brain
TCGA-FG-A4MX-01	TCGA-FG-A4MX-01	10.86	47	-17381		MALE	Astrocytoma			TUMOR FREE	G2			Supratentorial, Frontal Lobe	Central nervous system	FG Case Western	Brain
TCGA-VM-A8C9-01	TCGA-VM-A8C9-01	10.9	37	-13663		FEMALE	Astrocytoma			TUMOR FREE	G2			Supratentorial, Temporal Lobe	Central nervous system	VM Huntsman Cancer Institute	Brain
TCGA-F6-A8O4-01	TCGA-F6-A8O4-01	10.93	44	-16202		MALE	Astrocytoma			TUMOR FREE	G2			Supratentorial, Frontal Lobe	Central nervous system	F6 Asterand	Brain
TCGA-CS-4944-01	TCGA-CS-4944-01	11.06	50	-18494		MALE	Astrocytoma	0.7	1	WITH TUMOR	G2		0.3	Supratentorial, Temporal Lobe	Central nervous system	CS Thomas Jefferson University	Brain
TCGA-P5-A5EY-01	TCGA-P5-A5EY-01	11.11	21	-7716		MALE	Astrocytoma				G2			Supratentorial, Temporal Lobe	Central nervous system	P5 Cureline	Brain
TCGA-P5-A733-01	TCGA-P5-A733-01	11.11	52	-19142	134	FEMALE	Astrocytoma			TUMOR FREE	G2			Supratentorial, Frontal Lobe	Central nervous system	P5 Cureline	Brain
TCGA-HT-7478-01	TCGA-HT-7478-01	11.17	36	-13216		MALE	Astrocytoma			TUMOR FREE	G2			Supratentorial, Frontal Lobe	Central nervous system	HT Case Western - St Joes
TCGA-P5-A5F1-01	TCGA-P5-A5F1-01	11.2	30	-11070		MALE	Astrocytoma			TUMOR FREE	G2			Supratentorial, Temporal Lobe	Central nervous system	P5 Cureline	Brain
TCGA-HT-7854-01	TCGA-HT-7854-01	11.22	62	-22738		MALE	Astrocytoma	1.1	1.5	TUMOR FREE	G2		0.6	Supratentorial, Temporal Lobe	Central nervous system	HT Case Western - St Joes
TCGA-E1-A7Z4-01	TCGA-E1-A7Z4-01	11.23	35	-12849		MALE	Astrocytoma			WITH TUMOR	G2			Supratentorial, Frontal Lobe	Central nervous system	E1 Duke
TCGA-HT-7691-01	TCGA-HT-7691-01	11.24	31	-11465		FEMALE	Astrocytoma	1	1.4	TUMOR FREE	G2		0.8	Supratentorial, Not Otherwise Specified	Central nervous system	HT Case Western - St Joes
TCGA-DU-A5TU-01	TCGA-DU-A5TU-01	11.34	62	-22811		FEMALE	Astrocytoma			WITH TUMOR	G2			Supratentorial, Frontal Lobe	Central nervous system	DU Henry Ford Hospital	Brain
TCGA-S9-A7R7-01	TCGA-S9-A7R7-01	11.45	27	-10108	2647	MALE	Astrocytoma			WITH TUMOR	G2			Supratentorial, Frontal Lobe	Central nervous system	S9 Dept of Neurosurgery at University of Heidelberg
TCGA-HT-7680-01	TCGA-HT-7680-01	11.5	32	-11970		FEMALE	Astrocytoma	1	1.6	TUMOR FREE	G2		0.5	Posterior Fossa, Cerebellum	Central nervous system	HT Case Western - St Joes
TCGA-QH-A6CX-01	TCGA-QH-A6CX-01	11.53	66	-24252		MALE	Astrocytoma			WITH TUMOR	G2			Supratentorial, Temporal Lobe	Central nervous system	QH Fondazione-Besta	Brain
TCGA-DU-7007-01	TCGA-DU-7007-01	11.89	33	-12245		MALE	Astrocytoma	1	1		G2		0.6	Supratentorial, Frontal Lobe	Central nervous system	DU Henry Ford Hospital	Brain
TCGA-DH-A66D-01	TCGA-DH-A66D-01	10.63	43	-15866		FEMALE	Astrocytoma			WITH TUMOR	G3			Supratentorial, Frontal Lobe	Central nervous system	DH University of Florida	Brain
TCGA-CS-4942-01	TCGA-CS-4942-01	10.63	44	-16297		FEMALE	Astrocytoma			WITH TUMOR	G3			Supratentorial, Frontal Lobe	Central nervous system	CS Thomas Jefferson University	Brain
TCGA-S9-A6TS-01	TCGA-S9-A6TS-01	10.64	48	-17857	2402	FEMALE	Astrocytoma			WITH TUMOR	G3			Supratentorial, Frontal Lobe	Central nervous system	S9 Dept of Neurosurgery at University of Heidelberg
TCGA-RY-A83Z-01	TCGA-RY-A83Z-01	10.64	54	-19903		FEMALE	Astrocytoma			WITH TUMOR	G3			Supratentorial, Frontal Lobe	Central nervous system	RY University of California San Francisco	Brain
TCGA-DU-7292-01	TCGA-DU-7292-01	10.64	69	-25266		MALE	Astrocytoma			WITH TUMOR	G3			Supratentorial, Temporal Lobe	Central nervous system	DU Henry Ford Hospital	Brain
TCGA-DU-A5TW-01	TCGA-DU-A5TW-01	10.67	33	-12107	42	FEMALE	Astrocytoma			WITH TUMOR	G3			Supratentorial, Frontal Lobe	Central nervous system	DU Henry Ford Hospital	Brain
TCGA-DH-A7UT-01	TCGA-DH-A7UT-01	10.68	30	-11014	118	MALE	Astrocytoma			WITH TUMOR	G3			Supratentorial, Frontal Lobe	Central nervous system	DH University of Florida	Brain
TCGA-DB-A4XF-01	TCGA-DB-A4XF-01	10.68	41	-15066	456	FEMALE	Astrocytoma			TUMOR FREE	G3			Supratentorial, Frontal Lobe	Central nervous system	DB Mayo Clinic - Rochester	Brain
TCGA-E1-5305-01	TCGA-E1-5305-01	10.7	34	-12655		MALE	Astrocytoma	0.8	1	WITH TUMOR	G3		0.4	Supratentorial, Frontal Lobe	Central nervous system	E1 Duke
TCGA-CS-6290-01	TCGA-CS-6290-01	10.71	31	-11666		MALE	Astrocytoma	0.4	0.4		G3		0.4	Supratentorial, Temporal Lobe	Central nervous system	CS Thomas Jefferson University	Brain
TCGA-HT-A5R7-01	TCGA-HT-A5R7-01	10.72	33	-12092	147	FEMALE	Astrocytoma			TUMOR FREE	G3			Supratentorial, Parietal Lobe	Central nervous system	HT Case Western - St Joes
TCGA-E1-5307-01	TCGA-E1-5307-01	10.73	62	-22837		FEMALE	Astrocytoma	1	1.3	WITH TUMOR	G3		0.6	Supratentorial, Temporal Lobe	Central nervous system	E1 Duke
TCGA-S9-A7QX-01	TCGA-S9-A7QX-01	10.73	36	-13332	81	FEMALE	Astrocytoma			WITH TUMOR	G3			Supratentorial, Temporal Lobe	Central nervous system	S9 Dept of Neurosurgery at University of Heidelberg
TCGA-DU-A5TP-01	TCGA-DU-A5TP-01	10.74	33	-12111	301	MALE	Astrocytoma			TUMOR FREE	G3			Supratentorial, Parietal Lobe	Central nervous system	DU Henry Ford Hospital	Brain
TCGA-S9-A6U9-01	TCGA-S9-A6U9-01	10.74	36	-13460	2706	MALE	Astrocytoma			WITH TUMOR	G3			Supratentorial, Frontal Lobe	Central nervous system	S9 Dept of Neurosurgery at University of Heidelberg
TCGA-DU-7298-01	TCGA-DU-7298-01	10.75	38	-14205		FEMALE	Astrocytoma	0.7	1	WITH TUMOR	G3		0.5	Supratentorial, Temporal Lobe	Central nervous system	DU Henry Ford Hospital	Brain
TCGA-S9-A6WG-01	TCGA-S9-A6WG-01	10.75	31	-11509	2098	MALE	Astrocytoma			WITH TUMOR	G3			Supratentorial, Frontal Lobe	Central nervous system	S9 Dept of Neurosurgery at University of Heidelberg
TCGA-DB-5273-01	TCGA-DB-5273-01	10.76	33	-12152		MALE	Astrocytoma			TUMOR FREE	G3			Supratentorial, Frontal Lobe	Central nervous system	DB Mayo Clinic - Rochester	Brain
TCGA-CS-4943-01	TCGA-CS-4943-01	10.77	37	-13565		MALE	Astrocytoma	0.5	0.6	WITH TUMOR	G3		0.1	Supratentorial, Frontal Lobe	Central nervous system	CS Thomas Jefferson University	Brain
TCGA-DH-5142-01	TCGA-DH-5142-01	10.77	29	-10678		MALE	Astrocytoma			WITH TUMOR	G3			Supratentorial, Frontal Lobe	Central nervous system	DH University of Florida	Brain
TCGA-S9-A7IX-01	TCGA-S9-A7IX-01	10.77	57	-21095	540	MALE	Astrocytoma			WITH TUMOR	G3			Supratentorial, Temporal Lobe	Central nervous system	S9 Dept of Neurosurgery at University of Heidelberg
TCGA-E1-A7YD-01	TCGA-E1-A7YD-01	10.84	57	-21020	5445	MALE	Astrocytoma			WITH TUMOR	G3			Supratentorial, Temporal Lobe	Central nervous system	E1 Duke
TCGA-VM-A8CD-01	TCGA-VM-A8CD-01	10.84	58	-21200	517	MALE	Astrocytoma			WITH TUMOR	G3			Supratentorial, Temporal Lobe	Central nervous system	VM Huntsman Cancer Institute	Brain
TCGA-HT-A61B-01	TCGA-HT-A61B-01	10.85	22	-8335	101	MALE	Astrocytoma			TUMOR FREE	G3			Supratentorial, Temporal Lobe	Central nervous system	HT Case Western - St Joes
TCGA-VV-A86M-01	TCGA-VV-A86M-01	10.85	36	-13453		FEMALE	Astrocytoma			TUMOR FREE	G3			Supratentorial, Frontal Lobe	Central nervous system	VV John Wayne Cancer Center	Brain
TCGA-KT-A7W1-01	TCGA-KT-A7W1-01	10.85	45	-16560		FEMALE	Astrocytoma			TUMOR FREE	G3			Supratentorial, Frontal Lobe	Central nervous system	KT Hartford	Brain
TCGA-TM-A84F-01	TCGA-TM-A84F-01	10.89	48	-17744	1471	MALE	Astrocytoma			TUMOR FREE	G3			Supratentorial, Frontal Lobe	Central nervous system	TM The University of New South Wales	Brain
TCGA-P5-A736-01	TCGA-P5-A736-01	10.9	44	-16300	126	FEMALE	Astrocytoma			TUMOR FREE	G3			Supratentorial, Parietal Lobe	Central nervous system	P5 Cureline	Brain
TCGA-DU-A7TJ-01	TCGA-DU-A7TJ-01	10.9	55	-20394	29	MALE	Astrocytoma			WITH TUMOR	G3			Supratentorial, Temporal Lobe	Central nervous system	DU Henry Ford Hospital	Brain
TCGA-E1-5302-01	TCGA-E1-5302-01	10.91	41	-15230		MALE	Astrocytoma	0.7	1.1	WITH TUMOR	G3		0.3	Supratentorial, Frontal Lobe	Central nervous system	E1 Duke
TCGA-HT-A74O-01	TCGA-HT-A74O-01	10.93	34	-12460	124	MALE	Astrocytoma				G3			Supratentorial, Temporal Lobe	Central nervous system	HT Case Western - St Joes
TCGA-VM-A8CF-01	TCGA-VM-A8CF-01	10.93	44	-16334	280	FEMALE	Astrocytoma			TUMOR FREE	G3			Supratentorial, Frontal Lobe	Central nervous system	VM Huntsman Cancer Institute	Brain
TCGA-FG-5963-01	TCGA-FG-5963-01	10.94	23	-8571		MALE	Astrocytoma			WITH TUMOR	G3			Supratentorial, Frontal Lobe	Central nervous system	FG Case Western	Brain
TCGA-WY-A858-01	TCGA-WY-A858-01	10.94	32	-11855		FEMALE	Astrocytoma			TUMOR FREE	G3			Supratentorial, Frontal Lobe	Central nervous system	WY Johns Hopkins	Brain
TCGA-HT-7601-01	TCGA-HT-7601-01	10.96	30	-10989		FEMALE	Astrocytoma	1	2.7	TUMOR FREE	G3		0.9	Supratentorial, Frontal Lobe	Central nervous system	HT Case Western - St Joes
TCGA-DU-7010-01	TCGA-DU-7010-01	10.97	58	-21199		FEMALE	Astrocytoma	1	1.1	WITH TUMOR	G3		0.5	Supratentorial, Frontal Lobe	Central nervous system	DU Henry Ford Hospital	Brain
TCGA-DU-6392-01	TCGA-DU-6392-01	10.97	35	-12836		FEMALE	Astrocytoma			TUMOR FREE	G3			Supratentorial, Parietal Lobe	Central nervous system	DU Henry Ford Hospital	Brain
TCGA-S9-A6UA-01	TCGA-S9-A6UA-01	10.98	66	-24242	1989	MALE	Astrocytoma			WITH TUMOR	G3			Supratentorial, Temporal Lobe	Central nervous system	S9 Dept of Neurosurgery at University of Heidelberg
TCGA-DU-6405-01	TCGA-DU-6405-01	11.01	51	-18686		FEMALE	Astrocytoma			WITH TUMOR	G3			Supratentorial, Frontal Lobe	Central nervous system	DU Henry Ford Hospital	Brain
TCGA-HT-7477-01	TCGA-HT-7477-01	11.03	62	-22948	417	MALE	Astrocytoma			TUMOR FREE	G3			Supratentorial, Frontal Lobe	Central nervous system	HT Case Western - St Joes
TCGA-E1-5303-01	TCGA-E1-5303-01	11.04	38	-14212		MALE	Astrocytoma	0.6	0.8	WITH TUMOR	G3		0.6	Supratentorial, Frontal Lobe	Central nervous system	E1 Duke
TCGA-TM-A84I-01	TCGA-TM-A84I-01	11.04	30	-11221		MALE	Astrocytoma			TUMOR FREE	G3			Supratentorial, Parietal Lobe	Central nervous system	TM The University of New South Wales	Brain
TCGA-QH-A6XC-01	TCGA-QH-A6XC-01	11.04	48	-17692		MALE	Astrocytoma			WITH TUMOR	G3			Supratentorial, Frontal Lobe	Central nervous system	QH Fondazione-Besta	Brain
TCGA-P5-A5EZ-01	TCGA-P5-A5EZ-01	11.05	39	-14375	65	MALE	Astrocytoma			TUMOR FREE	G3			Supratentorial, Frontal Lobe	Central nervous system	P5 Cureline	Brain
TCGA-HT-7686-01	TCGA-HT-7686-01	11.06	29	-10724		FEMALE	Astrocytoma	0.9	2	TUMOR FREE	G3		0.6	Supratentorial, Parietal Lobe	Central nervous system	HT Case Western - St Joes
TCGA-DU-7013-01	TCGA-DU-7013-01	11.06	59	-21824		MALE	Astrocytoma	1	1	WITH TUMOR	G3		0.5	Supratentorial, Temporal Lobe	Central nervous system	DU Henry Ford Hospital	Brain
TCGA-E1-A7YN-01	TCGA-E1-A7YN-01	11.06	63	-23180		FEMALE	Astrocytoma			WITH TUMOR	G3			Supratentorial, Temporal Lobe	Central nervous system	E1 Duke
TCGA-HT-A5RA-01	TCGA-HT-A5RA-01	11.06	65	-23769	385	FEMALE	Astrocytoma			WITH TUMOR	G3			Supratentorial, Temporal Lobe	Central nervous system	HT Case Western - St Joes
TCGA-P5-A5EU-01	TCGA-P5-A5EU-01	11.07	35	-12851		MALE	Astrocytoma				G3			Supratentorial, Frontal Lobe	Central nervous system	P5 Cureline	Brain
TCGA-DU-5847-01	TCGA-DU-5847-01	11.08	34	-12606		FEMALE	Astrocytoma	0.8	1	WITH TUMOR	G3		0.4	Supratentorial, Frontal Lobe	Central nervous system	DU Henry Ford Hospital	Brain
TCGA-E1-A7YM-01	TCGA-E1-A7YM-01	11.1	63	-23263		MALE	Astrocytoma			WITH TUMOR	G3			Supratentorial, Temporal Lobe	Central nervous system	E1 Duke
TCGA-DB-5277-01	TCGA-DB-5277-01	11.11	34	-12725		MALE	Astrocytoma	1	1.5	WITH TUMOR	G3		0.1	Supratentorial, Frontal Lobe	Central nervous system	DB Mayo Clinic - Rochester	Brain
TCGA-HT-7479-01	TCGA-HT-7479-01	11.12	44	-16137		MALE	Astrocytoma	0.8	1	TUMOR FREE	G3		0.6	Supratentorial, Frontal Lobe	Central nervous system	HT Case Western - St Joes
TCGA-HT-8110-01	TCGA-HT-8110-01	11.12	57	-21183		MALE	Astrocytoma	0.9	1.6	TUMOR FREE	G3		0.9	Supratentorial, Parietal Lobe	Central nervous system	HT Case Western - St Joes
TCGA-DU-7012-01	TCGA-DU-7012-01	11.12	74	-27039		FEMALE	Astrocytoma	1	1.1	WITH TUMOR	G3		0.9	Supratentorial, Temporal Lobe	Central nervous system	DU Henry Ford Hospital	Brain
TCGA-HT-7860-01	TCGA-HT-7860-01	11.12	60	-22034		FEMALE	Astrocytoma	1.1	1.1	TUMOR FREE	G3		0.6	Supratentorial, Frontal Lobe	Central nervous system	HT Case Western - St Joes
TCGA-CS-4941-01	TCGA-CS-4941-01	11.15	67	-24578		MALE	Astrocytoma			WITH TUMOR	G3			Supratentorial, Frontal Lobe	Central nervous system	CS Thomas Jefferson University	Brain
TCGA-FG-A87Q-01	TCGA-FG-A87Q-01	11.18	61	-22565		FEMALE	Astrocytoma			TUMOR FREE	G3			Supratentorial, Parietal Lobe	Central nervous system	FG Case Western	Brain
TCGA-HT-8563-01	TCGA-HT-8563-01	11.2	30	-11305		FEMALE	Astrocytoma	0.6	0.7	TUMOR FREE	G3		0.2	Supratentorial, Frontal Lobe	Central nervous system	HT Case Western - St Joes
TCGA-HT-8104-01	TCGA-HT-8104-01	11.22	51	-18748		FEMALE	Astrocytoma	0.7	1.3	TUMOR FREE	G3		0.7	Supratentorial, Frontal Lobe	Central nervous system	HT Case Western - St Joes
TCGA-E1-5304-01	TCGA-E1-5304-01	11.22	42	-15481		MALE	Astrocytoma			WITH TUMOR	G3			Supratentorial, Frontal Lobe	Central nervous system	E1 Duke
TCGA-FG-6688-01	TCGA-FG-6688-01	11.23	59	-21745		FEMALE	Astrocytoma	1	1	WITH TUMOR	G3		0.8	Supratentorial, Parietal Lobe	Central nervous system	FG Case Western	Brain
TCGA-S9-A6WM-01	TCGA-S9-A6WM-01	11.23	59	-21761		FEMALE	Astrocytoma			WITH TUMOR	G3			Supratentorial, Temporal Lobe	Central nervous system	S9 Dept of Neurosurgery at University of Heidelberg
TCGA-HT-A618-01	TCGA-HT-A618-01	11.24	37	-13595	71	FEMALE	Astrocytoma			TUMOR FREE	G3			Supratentorial, Temporal Lobe	Central nervous system	HT Case Western - St Joes
TCGA-DU-6402-01	TCGA-DU-6402-01	11.26	52	-19207		MALE	Astrocytoma	1	1.5	WITH TUMOR	G3		0.5	Supratentorial, Frontal Lobe	Central nervous system	DU Henry Ford Hospital	Brain
TCGA-HT-8106-01	TCGA-HT-8106-01	11.27	53	-19555		MALE	Astrocytoma	0.9	1.2	TUMOR FREE	G3		0.5	Supratentorial, Frontal Lobe	Central nervous system	HT Case Western - St Joes
TCGA-CS-6665-01	TCGA-CS-6665-01	11.27	51	-18977		FEMALE	Astrocytoma			WITH TUMOR	G3			Supratentorial, Temporal Lobe	Central nervous system	CS Thomas Jefferson University	Brain
TCGA-HT-8011-01	TCGA-HT-8011-01	11.29	55	-20175		MALE	Astrocytoma	1	1.3	WITH TUMOR	G3		0.6	Supratentorial, Temporal Lobe	Central nervous system	HT Case Western - St Joes
TCGA-S9-A6WN-01	TCGA-S9-A6WN-01	11.29	38	-13961	181	FEMALE	Astrocytoma			WITH TUMOR	G3			Supratentorial, Frontal Lobe	Central nervous system	S9 Dept of Neurosurgery at University of Heidelberg
TCGA-FG-A6J3-01	TCGA-FG-A6J3-01	11.29	52	-19138		FEMALE	Astrocytoma			WITH TUMOR	G3			Supratentorial, Frontal Lobe	Central nervous system	FG Case Western	Brain
TCGA-E1-A7YK-01	TCGA-E1-A7YK-01	11.29	52	-19236		MALE	Astrocytoma				G3			Supratentorial, Temporal Lobe	Central nervous system	E1 Duke
TCGA-DU-8158-01	TCGA-DU-8158-01	11.3	57	-21129		FEMALE	Astrocytoma			WITH TUMOR	G3			Supratentorial, Frontal Lobe	Central nervous system	DU Henry Ford Hospital	Brain
TCGA-DU-7006-01	TCGA-DU-7006-01	11.32	60	-21990		FEMALE	Astrocytoma	0.8	1	WITH TUMOR	G3		0.4	Supratentorial, Temporal Lobe	Central nervous system	DU Henry Ford Hospital	Brain
TCGA-S9-A6U0-01	TCGA-S9-A6U0-01	11.32	46	-16890		MALE	Astrocytoma			WITH TUMOR	G3			Supratentorial, Temporal Lobe	Central nervous system	S9 Dept of Neurosurgery at University of Heidelberg
TCGA-FG-5963-02	TCGA-FG-5963-02	11.33	23	-8571	1095	MALE	Astrocytoma			WITH TUMOR	G3			Supratentorial, Frontal Lobe	Central nervous system	FG Case Western	Brain
TCGA-HT-7857-01	TCGA-HT-7857-01	11.34	24	-8912		FEMALE	Astrocytoma	1	2.3	TUMOR FREE	G3		0.3	Supratentorial, Not Otherwise Specified	Central nervous system	HT Case Western - St Joes
TCGA-HW-A5KK-01	TCGA-HW-A5KK-01	11.34	64	-23484		MALE	Astrocytoma			WITH TUMOR	G3			Supratentorial, Temporal Lobe	Central nervous system	HW MSKCC	Brain
TCGA-S9-A7R2-01	TCGA-S9-A7R2-01	11.34	69	-25419	2027	MALE	Astrocytoma			WITH TUMOR	G3			Supratentorial, Temporal Lobe	Central nervous system	S9 Dept of Neurosurgery at University of Heidelberg
TCGA-S9-A89Z-01	TCGA-S9-A89Z-01	11.35	40	-14858	63	MALE	Astrocytoma			WITH TUMOR	G3			Supratentorial, Frontal Lobe	Central nervous system	S9 Dept of Neurosurgery at University of Heidelberg
TCGA-DU-7290-01	TCGA-DU-7290-01	11.36	45	-16667		FEMALE	Astrocytoma			WITH TUMOR	G3			Supratentorial, Temporal Lobe	Central nervous system	DU Henry Ford Hospital	Brain
TCGA-DH-A66B-01	TCGA-DH-A66B-01	11.37	52	-19156	845	MALE	Astrocytoma			WITH TUMOR	G3			Supratentorial, Temporal Lobe	Central nervous system	DH University of Florida	Brain
TCGA-E1-A7YJ-01	TCGA-E1-A7YJ-01	11.41	55	-20180		MALE	Astrocytoma			WITH TUMOR	G3			Supratentorial, Frontal Lobe	Central nervous system	E1 Duke
TCGA-DU-5854-01	TCGA-DU-5854-01	11.44	57	-21106		FEMALE	Astrocytoma	0.9	1	WITH TUMOR	G3		0.7	Supratentorial, Frontal Lobe	Central nervous system	DU Henry Ford Hospital	Brain
TCGA-VW-A8FI-01	TCGA-VW-A8FI-01	11.48	66	-24411	154	MALE	Astrocytoma			WITH TUMOR	G3			Supratentorial, Temporal Lobe	Central nervous system	VM Huntsman Cancer Institute	Brain
TCGA-CS-5397-01	TCGA-CS-5397-01	11.5	54	-19866		FEMALE	Astrocytoma			WITH TUMOR	G3			Supratentorial, Temporal Lobe	Central nervous system	CS Thomas Jefferson University	Brain
TCGA-QH-A6CS-01	TCGA-QH-A6CS-01	11.58	41	-15092		MALE	Astrocytoma			WITH TUMOR	G3			Supratentorial, Frontal Lobe	Central nervous system	QH Fondazione-Besta	Brain
TCGA-HT-A5RC-01	TCGA-HT-A5RC-01	11.64	70	-25772	140	FEMALE	Astrocytoma			WITH TUMOR	G3			Supratentorial, Frontal Lobe	Central nervous system	HT Case Western - St Joes
TCGA-CS-6188-01	TCGA-CS-6188-01	11.77	48	-17729		MALE	Astrocytoma	0.8	1.2	WITH TUMOR	G3		0.4	Supratentorial, Temporal Lobe	Central nervous system	CS Thomas Jefferson University	Brain
TCGA-HT-A74H-01	TCGA-HT-A74H-01	11.85	62	-22850		MALE	Astrocytoma				G3			Supratentorial, Temporal Lobe	Central nervous system	HT Case Western - St Joes
TCGA-E1-A7YL-01	TCGA-E1-A7YL-01	11.9	46	-16982		MALE	Astrocytoma			WITH TUMOR	G3			Supratentorial, Frontal Lobe	Central nervous system	E1 Duke	Brain
TCGA-DU-A5TY-01	TCGA-DU-A5TY-01	11.93	46	-16945		FEMALE	Astrocytoma			WITH TUMOR	G3			Supratentorial, Parietal Lobe	Central nervous system	DU Henry Ford Hospital	Brain
TCGA-TM-A7C3-01	TCGA-TM-A7C3-01	12.19	43	-16021	1409	FEMALE	Astrocytoma			WITH TUMOR	G3			Supratentorial, Temporal Lobe	Central nervous system	TM The University of New South Wales	Brain
TCGA-TQ-A7RK-02	TCGA-TQ-A7RK-02	10.63	29	-10742	1131	MALE	Oligoastrocytoma			TUMOR FREE	G2			Supratentorial, Frontal Lobe	Central nervous system	TQ University of Sao Paulo	Brain
TCGA-DB-A64S-01	TCGA-DB-A64S-01	10.64	20	-7389	352	MALE	Oligoastrocytoma			TUMOR FREE	G2			Supratentorial, Frontal Lobe	Central nervous system	DB Mayo Clinic - Rochester	Brain
TCGA-TQ-A7RK-01	TCGA-TQ-A7RK-01	10.64	29	-10742	1057	MALE	Oligoastrocytoma			TUMOR FREE	G2			Supratentorial, Frontal Lobe	Central nervous system	TQ University of Sao Paulo	Brain
TCGA-HT-7608-01	TCGA-HT-7608-01	10.66	61	-22302		MALE	Oligoastrocytoma	0.9	2.2	TUMOR FREE	G2		0.5	Supratentorial, Temporal Lobe	Central nervous system	HT Case Western - St Joes
TCGA-DU-7011-01	TCGA-DU-7011-01	10.67	25	-9322		MALE	Oligoastrocytoma			WITH TUMOR	G2			Supratentorial, Frontal Lobe	Central nervous system	DU Henry Ford Hospital	Brain
TCGA-DU-6395-01	TCGA-DU-6395-01	10.68	31	-11584		MALE	Oligoastrocytoma			WITH TUMOR	G2			Supratentorial, Frontal Lobe	Central nervous system	DU Henry Ford Hospital	Brain
TCGA-HT-8013-01	TCGA-HT-8013-01	10.69	37	-13753		FEMALE	Oligoastrocytoma	0.8	0.8	WITH TUMOR	G2		0.8	Supratentorial, Frontal Lobe	Central nervous system	HT Case Western - St Joes
TCGA-FG-7643-01	TCGA-FG-7643-01	10.7	49	-18206		FEMALE	Oligoastrocytoma	0.8	1.3	WITH TUMOR	G2		0.6	Supratentorial, Frontal Lobe	Central nervous system	FG Case Western	Brain
TCGA-DU-5853-01	TCGA-DU-5853-01	10.71	29	-10624		MALE	Oligoastrocytoma	0.9	0.9	WITH TUMOR	G2		0.8	Supratentorial, Frontal Lobe	Central nervous system	DU Henry Ford Hospital	Brain
TCGA-FG-A4MY-01	TCGA-FG-A4MY-01	10.72	44	-16310		FEMALE	Oligoastrocytoma			WITH TUMOR	G2			Supratentorial, Parietal Lobe	Central nervous system	FG Case Western	Brain
TCGA-HT-7880-01	TCGA-HT-7880-01	10.74	30	-11043		MALE	Oligoastrocytoma			TUMOR FREE	G2			Supratentorial, Parietal Lobe	Central nervous system	HT Case Western - St Joes
TCGA-DB-A4XA-01	TCGA-DB-A4XA-01	10.75	30	-11195	224	MALE	Oligoastrocytoma			WITH TUMOR	G2			Supratentorial, Parietal Lobe	Central nervous system	DB Mayo Clinic - Rochester	Brain
TCGA-S9-A6WI-01	TCGA-S9-A6WI-01	10.75	56	-20609		FEMALE	Oligoastrocytoma			WITH TUMOR	G2			Supratentorial, Frontal Lobe	Central nervous system	S9 Dept of Neurosurgery at University of Heidelberg
TCGA-QH-A6X5-01	TCGA-QH-A6X5-01	10.75	58	-21239		FEMALE	Oligoastrocytoma				G2			Supratentorial, Frontal Lobe	Central nervous system	QH Fondazione-Besta	Brain
TCGA-FG-8187-01	TCGA-FG-8187-01	10.76	31	-11684		MALE	Oligoastrocytoma	1.2	1.4	TUMOR FREE	G2		0.7	Supratentorial, Frontal Lobe	Central nervous system	FG Case Western	Brain
TCGA-FG-A60J-01	TCGA-FG-A60J-01	10.76	47	-17339		FEMALE	Oligoastrocytoma			TUMOR FREE	G2			Supratentorial, Frontal Lobe	Central nervous system	FG Case Western	Brain
TCGA-WY-A85D-01	TCGA-WY-A85D-01	10.76	60	-21979	1035	MALE	Oligoastrocytoma			WITH TUMOR	G2			Supratentorial, Frontal Lobe	Central nervous system	WY Johns Hopkins	Brain
TCGA-HT-7681-01	TCGA-HT-7681-01	10.8	29	-10790		FEMALE	Oligoastrocytoma	0.9	2.8	TUMOR FREE	G2		0.6	Supratentorial, Frontal Lobe	Central nervous system	HT Case Western - St Joes
TCGA-P5-A731-01	TCGA-P5-A731-01	10.81	59	-21715	143	FEMALE	Oligoastrocytoma			TUMOR FREE	G2			Supratentorial, Frontal Lobe	Central nervous system	P5Cureline	Brain
TCGA-DU-5871-01	TCGA-DU-5871-01	10.84	37	-13673		FEMALE	Oligoastrocytoma			TUMOR FREE	G2			Supratentorial, Frontal Lobe	Central nervous system	DU Henry Ford Hospital	Brain
TCGA-E1-5322-01	TCGA-E1-5322-01	10.85	38	-13903		FEMALE	Oligoastrocytoma				G2			Supratentorial, Temporal Lobe	Central nervous system	E1 Duke
TCGA-HT-7902-01	TCGA-HT-7902-01	10.86	30	-11118		FEMALE	Oligoastrocytoma	0.8	1.5	TUMOR FREE	G2		0.8	Supratentorial, Frontal Lobe	Central nervous system	HT Case Western - St Joes
TCGA-TQ-A7RR-01	TCGA-TQ-A7RR-01	10.86	38	-14022	454	MALE	Oligoastrocytoma			TUMOR FREE	G2			Supratentorial, Parietal Lobe	Central nervous system	TQ University of Sao Paulo	Brain
TCGA-HT-7473-01	TCGA-HT-7473-01	10.89	28	-10306		MALE	Oligoastrocytoma	1.2	1.5	TUMOR FREE	G2		0.5	Supratentorial, Temporal Lobe	Central nervous system	HT Case Western - St Joes
TCGA-FG-5965-02	TCGA-FG-5965-02	10.89	39	-14249	1437	FEMALE	Oligoastrocytoma			WITH TUMOR	G2			Supratentorial, Frontal Lobe	Central nervous system	FG Case Western	Brain
TCGA-HT-A614-01	TCGA-HT-A614-01	10.9	47	-17392	78	MALE	Oligoastrocytoma			WITH TUMOR	G2			Supratentorial, Not Otherwise Specified	Central nervous system	HT Case Western - St Joes
TCGA-WY-A85E-01	TCGA-WY-A85E-01	10.91	48	-17878	794	FEMALE	Oligoastrocytoma			WITH TUMOR	G2			Supratentorial, Frontal Lobe	Central nervous system	WY Johns Hopkins	Brain
TCGA-HT-7482-01	TCGA-HT-7482-01	10.94	18	-6857		FEMALE	Oligoastrocytoma			TUMOR FREE	G2			Supratentorial, Frontal Lobe	Central nervous system	HT Case Western - St Joes
TCGA-HT-7692-01	TCGA-HT-7692-01	10.96	43	-15727		MALE	Oligoastrocytoma			TUMOR FREE	G2			Supratentorial, Frontal Lobe	Central nervous system	HT Case Western - St Joes
TCGA-S9-A6WQ-01	TCGA-S9-A6WQ-01	10.96	57	-21133		FEMALE	Oligoastrocytoma			WITH TUMOR	G2			Supratentorial, Frontal Lobe	Central nervous system	S9 Dept of Neurosurgery at University of Heidelberg
TCGA-HT-7474-01	TCGA-HT-7474-01	11.03	52	-19149		MALE	Oligoastrocytoma			TUMOR FREE	G2			Supratentorial, Frontal Lobe	Central nervous system	HT Case Western - St Joes
TCGA-TQ-A7RP-01	TCGA-TQ-A7RP-01	11.06	66	-24109	553	MALE	Oligoastrocytoma			WITH TUMOR	G2			Supratentorial, Temporal Lobe	Central nervous system	TQ University of Sao Paulo	Brain
TCGA-DU-8167-01	TCGA-DU-8167-01	11.09	69	-25262		FEMALE	Oligoastrocytoma	1.2	1.2	TUMOR FREE	G2		0.4	Supratentorial, Frontal Lobe	Central nervous system	DU Henry Ford Hospital	Brain
TCGA-DU-A5TR-01	TCGA-DU-A5TR-01	11.1	51	-18791		MALE	Oligoastrocytoma			TUMOR FREE	G2			Supratentorial, Temporal Lobe	Central nervous system	DU Henry Ford Hospital	Brain
TCGA-DU-5872-02	TCGA-DU-5872-02	11.18	43	-15986	1317	FEMALE	Oligoastrocytoma			WITH TUMOR	G2			Supratentorial, Frontal Lobe	Central nervous system	DU Henry Ford Hospital	Brain
TCGA-QH-A65S-01	TCGA-QH-A65S-01	11.2	32	-11861	56	FEMALE	Oligoastrocytoma			WITH TUMOR	G2			Supratentorial, Frontal Lobe	Central nervous system	QH Fondazione-Besta	Brain
TCGA-DB-A64O-01	TCGA-DB-A64O-01	11.49	59	-21811	533	MALE	Oligoastrocytoma			WITH TUMOR	G2			Supratentorial, Temporal Lobe	Central nervous system	DB Mayo Clinic - Rochester	Brain
TCGA-DB-A64W-01	TCGA-DB-A64W-01	10.65	65	-23936		FEMALE	Oligoastrocytoma			TUMOR FREE	G3			Supratentorial, Frontal Lobe	Central nervous system	DB Mayo Clinic - Rochester	Brain
TCGA-TQ-A7RM-01	TCGA-TQ-A7RM-01	10.66	41	-15154		FEMALE	Oligoastrocytoma			WITH TUMOR	G3			Supratentorial, Temporal Lobe	Central nervous system	TQ University of Sao Paulo	Brain
TCGA-DU-6542-01	TCGA-DU-6542-01	10.67	25	-9380		MALE	Oligoastrocytoma			WITH TUMOR	G3			Supratentorial, Temporal Lobe	Central nervous system	DU Henry Ford Hospital	Brain
TCGA-DU-6396-01	TCGA-DU-6396-01	10.68	31	-11427		FEMALE	Oligoastrocytoma	1	1	WITH TUMOR	G3		1	Supratentorial, Frontal Lobe	Central nervous system	DU Henry Ford Hospital	Brain
TCGA-QH-A870-01	TCGA-QH-A870-01	10.71	38	-14082	1	FEMALE	Oligoastrocytoma			WITH TUMOR	G3			Supratentorial, Occipital Lobe	Central nervous system	QH Fondazione-Besta	Brain
TCGA-DB-5274-01	TCGA-DB-5274-01	10.72	37	-13680		FEMALE	Oligoastrocytoma			TUMOR FREE	G3			Supratentorial, Frontal Lobe	Central nervous system	DB Mayo Clinic - Rochester	Brain
TCGA-VV-A829-01	TCGA-VV-A829-01	10.74	44	-16163	720	MALE	Oligoastrocytoma			TUMOR FREE	G3			Supratentorial, Frontal Lobe	Central nervous system	VV John Wayne Cancer Center	Brain
TCGA-DB-5270-01	TCGA-DB-5270-01	10.75	38	-13904		FEMALE	Oligoastrocytoma	1	1	TUMOR FREE	G3		0.7	Supratentorial, Frontal Lobe	Central nervous system	DB Mayo Clinic - Rochester	Brain
TCGA-DH-5140-01	TCGA-DH-5140-01	10.75	38	-13943		FEMALE	Oligoastrocytoma			WITH TUMOR	G3			Supratentorial, Temporal Lobe	Central nervous system	DH University of Florida	Brain
TCGA-DU-5855-01	TCGA-DU-5855-01	10.76	49	-18234		FEMALE	Oligoastrocytoma	0.7	1.1	WITH TUMOR	G3		0.7	Supratentorial, Frontal Lobe	Central nervous system	DU Henry Ford Hospital	Brain
TCGA-HT-7684-01	TCGA-HT-7684-01	10.76	58	-21352		MALE	Oligoastrocytoma	0.9	1.7	TUMOR FREE	G3		0.9	Supratentorial, Frontal Lobe	Central nervous system	HT Case Western - St Joes
TCGA-P5-A77W-01	TCGA-P5-A77W-01	10.78	37	-13545	114	FEMALE	Oligoastrocytoma			TUMOR FREE	G3			Supratentorial, Frontal Lobe	Central nervous system	P5 Cureline	Brain
TCGA-DU-8162-01	TCGA-DU-8162-01	10.8	61	-22596		FEMALE	Oligoastrocytoma			WITH TUMOR	G3			Supratentorial, Temporal Lobe	Central nervous system	DU Henry Ford Hospital	Brain
TCGA-FG-A4MW-01	TCGA-FG-A4MW-01	10.84	63	-23077	64	MALE	Oligoastrocytoma			WITH TUMOR	G3			Supratentorial, Frontal Lobe	Central nervous system	FG Case Western	Brain
TCGA-CS-6186-01	TCGA-CS-6186-01	10.9	58	-21321		MALE	Oligoastrocytoma			WITH TUMOR	G3			Supratentorial, Frontal Lobe	Central nervous system	CS Thomas Jefferson University	Brain
TCGA-DB-5276-01	TCGA-DB-5276-01	10.92	32	-11738		MALE	Oligoastrocytoma			TUMOR FREE	G3			Supratentorial, Frontal Lobe	Central nervous system	DB Mayo Clinic - Rochester	Brain
TCGA-HT-8111-01	TCGA-HT-8111-01	10.94	32	-11810		MALE	Oligoastrocytoma				G3			Supratentorial, Frontal Lobe	Central nervous system	HT Case Western - St Joes
TCGA-DU-A7TD-01	TCGA-DU-A7TD-01	10.96	52	-19025	616	MALE	Oligoastrocytoma			WITH TUMOR	G3			Supratentorial, Temporal Lobe	Central nervous system	DU Henry Ford Hospital	Brain
TCGA-HT-7690-01	TCGA-HT-7690-01	10.99	29	-10673		MALE	Oligoastrocytoma			TUMOR FREE	G3			Supratentorial, Frontal Lobe	Central nervous system	HT Case Western - St Joes
TCGA-DU-5852-01	TCGA-DU-5852-01	11	61	-22348		FEMALE	Oligoastrocytoma			WITH TUMOR	G3			Supratentorial, Temporal Lobe	Central nervous system	DU Henry Ford Hospital	Brain
TCGA-S9-A6TV-01	TCGA-S9-A6TV-01	11.04	50	-18321		MALE	Oligoastrocytoma			TUMOR FREE	G3			Supratentorial, Frontal Lobe	Central nervous system	S9 Dept of Neurosurgery at University of Heidelberg
TCGA-DU-8161-01	TCGA-DU-8161-01	11.12	63	-23064		FEMALE	Oligoastrocytoma	1	1	WITH TUMOR	G3		0.7	Supratentorial, Not Otherwise Specified	Central nervous system	DU Henry Ford Hospital	Brain
TCGA-FG-A70Z-01	TCGA-FG-A70Z-01	11.23	53	-19717		FEMALE	Oligoastrocytoma			WITH TUMOR	G3			Supratentorial, Temporal Lobe	Central nervous system	FG Case Western	Brain
TCGA-DU-6406-01	TCGA-DU-6406-01	11.46	59	-21634		FEMALE	Oligoastrocytoma	0.5	1		G3		0.5	Supratentorial, Frontal Lobe	Central nervous system	DU Henry Ford Hospital	Brain
TCGA-FG-A4MU-01	TCGA-FG-A4MU-01	11.55	58	-21450	258	MALE	Oligoastrocytoma			WITH TUMOR	G3			Supratentorial, Temporal Lobe	Central nervous system	FG Case Western	Brain
TCGA-QH-A6CV-01	TCGA-QH-A6CV-01	12.21	51	-18955	52	MALE	Oligoastrocytoma			WITH TUMOR	G3			Supratentorial, Frontal Lobe	Central nervous system	QH Fondazione-Besta	Brain
TCGA-HT-A61A-01	TCGA-HT-A61A-01	10.63	20	-7664		FEMALE	Oligodendroglioma			TUMOR FREE	G2			Supratentorial, Temporal Lobe	Central nervous system	HT Case Western - St Joes
TCGA-HT-A5R5-01	TCGA-HT-A5R5-01	10.63	33	-12403	194	FEMALE	Oligodendroglioma			TUMOR FREE	G2			Supratentorial, Temporal Lobe	Central nervous system	HT Case Western - St Joes
TCGA-FG-5964-01	TCGA-FG-5964-01	10.64	62	-22735		MALE	Oligodendroglioma	0.7	0.7	WITH TUMOR	G2		0.6	Supratentorial, Parietal Lobe	Central nervous system	FG Case Western	Brain
TCGA-FG-6690-01	TCGA-FG-6690-01	10.66	70	-25667		MALE	Oligodendroglioma			WITH TUMOR	G2			Supratentorial, Frontal Lobe	Central nervous system	FG Case Western	Brain
TCGA-DU-6407-01	TCGA-DU-6407-01	10.67	35	-13021		FEMALE	Oligodendroglioma	0.8	0.8	WITH TUMOR	G2		0.5	[Discrepancy]	Central nervous system	DU Henry Ford Hospital	Brain
TCGA-E1-5319-01	TCGA-E1-5319-01	10.67	48	-17612		FEMALE	Oligodendroglioma	0.8	1	WITH TUMOR	G2		0.5	Supratentorial, Frontal Lobe	Central nervous system	E1 Duke
TCGA-DU-A5TS-01	TCGA-DU-A5TS-01	10.69	42	-15650	259	MALE	Oligodendroglioma			TUMOR FREE	G2			Supratentorial, Frontal Lobe	Central nervous system	DU Henry Ford Hospital	Brain
TCGA-FG-7634-01	TCGA-FG-7634-01	10.7	28	-10476		MALE	Oligodendroglioma			WITH TUMOR	G2			Supratentorial, Frontal Lobe	Central nervous system	FG Case Western	Brain
TCGA-DU-7301-01	TCGA-DU-7301-01	10.71	53	-19644		MALE	Oligodendroglioma	1	1	WITH TUMOR	G2		0.5	Supratentorial, Temporal Lobe	Central nervous system	DU Henry Ford Hospital	Brain
TCGA-HT-7881-01	TCGA-HT-7881-01	10.71	38	-14171		MALE	Oligodendroglioma			TUMOR FREE	G2			Supratentorial, Temporal Lobe	Central nervous system	HT Case Western - St Joes
TCGA-R8-A6MO-01	TCGA-R8-A6MO-01	10.71	53	-19432		FEMALE	Oligodendroglioma				G2			Supratentorial, Frontal Lobe	Central nervous system	R8 MD Anderson	Brain
TCGA-HT-7676-01	TCGA-HT-7676-01	10.73	26	-9667		MALE	Oligodendroglioma			TUMOR FREE	G2			Supratentorial, Frontal Lobe	Central nervous system	HT Case Western - St Joes
TCGA-DU-7008-01	TCGA-DU-7008-01	10.73	41	-15289		FEMALE	Oligodendroglioma			TUMOR FREE	G2			Supratentorial, Frontal Lobe	Central nervous system	DU Henry Ford Hospital	Brain
TCGA-VM-A8C8-01	TCGA-VM-A8C8-01	10.73	50	-18494	959	FEMALE	Oligodendroglioma				G2			Supratentorial, Temporal Lobe	Central nervous system	VM Huntsman Cancer Institute	Brain
TCGA-DU-7015-01	TCGA-DU-7015-01	10.74	41	-15041		FEMALE	Oligodendroglioma			WITH TUMOR	G2			Supratentorial, Temporal Lobe	Central nervous system	DU Henry Ford Hospital	Brain
TCGA-TQ-A8XE-02	TCGA-TQ-A8XE-02	10.74	42	-15629	1308	FEMALE	Oligodendroglioma			WITH TUMOR	G2			Supratentorial, Temporal Lobe	Central nervous system	TQ University of Sao Paulo	Brain
TCGA-DU-7014-01	TCGA-DU-7014-01	10.74	59	-21865		MALE	Oligodendroglioma			WITH TUMOR	G2			Supratentorial, Frontal Lobe	Central nervous system	DU Henry Ford Hospital	Brain
TCGA-DB-A64L-01	TCGA-DB-A64L-01	10.75	67	-24690		FEMALE	Oligodendroglioma			WITH TUMOR	G2			Supratentorial, Frontal Lobe	Central nervous system	DB Mayo Clinic - Rochester	Brain
TCGA-HT-7481-01	TCGA-HT-7481-01	10.76	39	-14306		MALE	Oligodendroglioma	1	2	WITH TUMOR	G2		0.9	Supratentorial, Frontal Lobe	Central nervous system	HT Case Western - St Joes
TCGA-RY-A847-01	TCGA-RY-A847-01	10.77	45	-16732	471	MALE	Oligodendroglioma			TUMOR FREE	G2			Supratentorial, Frontal Lobe	Central nervous system	RY University of California San Francisco	Brain
TCGA-HT-7467-01	TCGA-HT-7467-01	10.78	54	-19944		MALE	Oligodendroglioma			TUMOR FREE	G2			Supratentorial, Parietal Lobe	Central nervous system	HT Case Western - St Joes
TCGA-DU-A7TA-01	TCGA-DU-A7TA-01	10.8	32	-11764		MALE	Oligodendroglioma			TUMOR FREE	G2			Supratentorial, Occipital Lobe	Central nervous system	DU Henry Ford Hospital	Brain
TCGA-HW-7486-01	TCGA-HW-7486-01	10.81	37	-13546		MALE	Oligodendroglioma	0.9	1	TUMOR FREE	G2		0.8	Supratentorial, Frontal Lobe	Central nervous system	HW MSKCC
TCGA-HT-7602-01	TCGA-HT-7602-01	10.82	21	-7946		MALE	Oligodendroglioma	1	2.8	TUMOR FREE	G2		1	Supratentorial, Frontal Lobe	Central nervous system	HT Case Western - St Joes
TCGA-HT-8558-01	TCGA-HT-8558-01	10.82	29	-10950		FEMALE	Oligodendroglioma			TUMOR FREE	G2			Supratentorial, Temporal Lobe	Central nervous system	HT Case Western - St Joes
TCGA-QH-A65V-01	TCGA-QH-A65V-01	10.83	43	-15850		FEMALE	Oligodendroglioma			WITH TUMOR	G2			Supratentorial, Temporal Lobe	Central nervous system	QH Fondazione-Besta	Brain
TCGA-FG-A4MT-02	TCGA-FG-A4MT-02	10.84	27	-10082	827	FEMALE	Oligodendroglioma			TUMOR FREE	G2			Supratentorial, Temporal Lobe	Central nervous system	FG Case Western	Brain
TCGA-IK-7675-01	TCGA-IK-7675-01	10.87	43	-15900		MALE	Oligodendroglioma	0.8	1	WITH TUMOR	G2		0.4	Supratentorial, Frontal Lobe	Central nervous system	IK Christiana Healthcare	Brain
TCGA-VM-A8CA-01	TCGA-VM-A8CA-01	10.93	54	-19991	798	MALE	Oligodendroglioma			WITH TUMOR	G2			Supratentorial, Frontal Lobe	Central nervous system	VM Huntsman Cancer Institute	Brain
TCGA-DB-5279-01	TCGA-DB-5279-01	10.94	59	-21908		MALE	Oligodendroglioma	1	1.3	TUMOR FREE	G2		0.4	Supratentorial, Frontal Lobe	Central nervous system	DB Mayo Clinic - Rochester	Brain
TCGA-EZ-7264-01	TCGA-EZ-7264-01	10.98	47	-17432		FEMALE	Oligodendroglioma			WITH TUMOR	G2			Supratentorial, Frontal Lobe	Central nervous system	EZ UNC	Brain
TCGA-HT-7603-01	TCGA-HT-7603-01	11	29	-10883		MALE	Oligodendroglioma			TUMOR FREE	G2			Supratentorial, Frontal Lobe	Central nervous system	HT Case Western - St Joes
TCGA-DU-6407-02	TCGA-DU-6407-02	11.01	35	-13021	4524	FEMALE	Oligodendroglioma			WITH TUMOR	G2			[Discrepancy]	Central nervous system	DU Henry Ford Hospital	Brain
TCGA-DB-A64V-01	TCGA-DB-A64V-01	11.16	54	-19950	352	MALE	Oligodendroglioma			TUMOR FREE	G2			Supratentorial, Frontal Lobe	Central nervous system	DB Mayo Clinic - Rochester	Brain
TCGA-DU-A7TB-01	TCGA-DU-A7TB-01	11.2	56	-20704	1168	MALE	Oligodendroglioma			TUMOR FREE	G2			Supratentorial, Temporal Lobe	Central nervous system	DU Henry Ford Hospital	Brain
TCGA-E1-A7Z2-01	TCGA-E1-A7Z2-01	11.21	58	-21341	614	FEMALE	Oligodendroglioma			WITH TUMOR	G2			Supratentorial, Frontal Lobe	Central nervous system	E1 Duke
TCGA-DU-A76K-01	TCGA-DU-A76K-01	11.31	87	-31776		MALE	Oligodendroglioma			WITH TUMOR	G2			Supratentorial, Parietal Lobe	Central nervous system	DU Henry Ford Hospital	Brain
TCGA-CS-5395-01	TCGA-CS-5395-01	11.61	43	-15848		MALE	Oligodendroglioma	1	1.5	WITH TUMOR	G2		0.1	Supratentorial, Parietal Lobe	Central nervous system	CS Thomas Jefferson University	Brain
TCGA-HT-A617-01	TCGA-HT-A617-01	11.68	47	-17331		MALE	Oligodendroglioma				G2			Supratentorial, Not Otherwise Specified	Central nervous system	HT Case Western - St Joes	Brain
TCGA-P5-A5F6-01	TCGA-P5-A5F6-01	12.09	26	-9575		MALE	Oligodendroglioma			TUMOR FREE	G2			Supratentorial, Frontal Lobe	Central nervous system	P5 Cureline	Brain
TCGA-TQ-A7RF-01	TCGA-TQ-A7RF-01	10.63	27	-9919		FEMALE	Oligodendroglioma			WITH TUMOR	G3			Supratentorial, Temporal Lobe	Central nervous system	TQ University of Sao Paulo	Brain
TCGA-HT-7470-01	TCGA-HT-7470-01	10.65	37	-13611		MALE	Oligodendroglioma	1	1.3	TUMOR FREE	G3		0.8	Supratentorial, Temporal Lobe	Central nervous system	HT Case Western - St Joes
TCGA-P5-A5F4-01	TCGA-P5-A5F4-01	10.67	35	-12851	37	FEMALE	Oligodendroglioma			TUMOR FREE	G3			Supratentorial, Temporal Lobe	Central nervous system	P5 Cureline	Brain
TCGA-S9-A6TW-01	TCGA-S9-A6TW-01	10.67	40	-14679		MALE	Oligodendroglioma			TUMOR FREE	G3			Supratentorial, Frontal Lobe	Central nervous system	S9 Dept of Neurosurgery at University of Heidelberg
TCGA-HT-7616-01	TCGA-HT-7616-01	10.68	75	-27685		MALE	Oligodendroglioma	0.9	1.3	WITH TUMOR	G3		0.3	Supratentorial, Frontal Lobe	Central nervous system	HT Case Western - St Joes
TCGA-DU-6408-01	TCGA-DU-6408-01	10.68	23	-8752		FEMALE	Oligodendroglioma	1	1		G3		0.5	Supratentorial, Frontal Lobe	Central nervous system	DU Henry Ford Hospital	Brain
TCGA-DB-A64P-01	TCGA-DB-A64P-01	10.68	40	-14936	443	MALE	Oligodendroglioma			TUMOR FREE	G3			Supratentorial, Frontal Lobe	Central nervous system	DB Mayo Clinic - Rochester	Brain
TCGA-HT-A5R9-01	TCGA-HT-A5R9-01	10.68	48	-17775	79	FEMALE	Oligodendroglioma				G3			Supratentorial, Frontal Lobe	Central nervous system	HT Case Western - St Joes
TCGA-HT-A4DV-01	TCGA-HT-A4DV-01	10.69	51	-18799	141	FEMALE	Oligodendroglioma			TUMOR FREE	G3			Supratentorial, Frontal Lobe	Central nervous system	HT Case Western - St Joes
TCGA-DH-A7UR-01	TCGA-DH-A7UR-01	10.69	59	-21803		FEMALE	Oligodendroglioma			TUMOR FREE	G3			Supratentorial, Frontal Lobe	Central nervous system	DH University of Florida	Brain
TCGA-DH-A66G-01	TCGA-DH-A66G-01	10.7	49	-18199		FEMALE	Oligodendroglioma			WITH TUMOR	G3			Supratentorial, Frontal Lobe	Central nervous system	DH University of Florida	Brain
TCGA-S9-A6WD-01	TCGA-S9-A6WD-01	10.72	58	-21231	1922	MALE	Oligodendroglioma			WITH TUMOR	G3			Supratentorial, Parietal Lobe	Central nervous system	S9 Dept of Neurosurgery at University of Heidelberg
TCGA-S9-A7J0-01	TCGA-S9-A7J0-01	10.73	30	-10989		FEMALE	Oligodendroglioma			WITH TUMOR	G3			Supratentorial, Frontal Lobe	Central nervous system	S9 Dept of Neurosurgery at University of Heidelberg
TCGA-DU-7300-01	TCGA-DU-7300-01	10.74	53	-19610		FEMALE	Oligodendroglioma	1	1	WITH TUMOR	G3		0.4	Supratentorial, Frontal Lobe	Central nervous system	DU Henry Ford Hospital	Brain
TCGA-HT-8019-01	TCGA-HT-8019-01	10.76	34	-12669		FEMALE	Oligodendroglioma			TUMOR FREE	G3			Supratentorial, Frontal Lobe	Central nervous system	HT Case Western - St Joes
TCGA-HT-7694-01	TCGA-HT-7694-01	10.78	60	-21930		MALE	Oligodendroglioma	0.9	2.5	TUMOR FREE	G3		0.5	Supratentorial, Frontal Lobe	Central nervous system	HT Case Western - St Joes
TCGA-DU-A7T6-01	TCGA-DU-A7T6-01	10.82	73	-26766	4265	FEMALE	Oligodendroglioma			WITH TUMOR	G3			Supratentorial, Frontal Lobe	Central nervous system	DU Henry Ford Hospital	Brain
TCGA-TM-A84O-01	TCGA-TM-A84O-01	10.83	61	-22327	920	FEMALE	Oligodendroglioma			WITH TUMOR	G3			Supratentorial, Not Otherwise Specified	Central nervous system	TM The University of New South Wales	Brain
TCGA-DU-A6S8-01	TCGA-DU-A6S8-01	10.86	74	-27084		FEMALE	Oligodendroglioma			WITH TUMOR	G3			Supratentorial, Frontal Lobe	Central nervous system	DU Henry Ford Hospital	Brain
TCGA-HT-A619-01	TCGA-HT-A619-01	10.89	51	-18857	84	FEMALE	Oligodendroglioma			TUMOR FREE	G3			Supratentorial, Frontal Lobe	Central nervous system	HT Case Western - St Joes
TCGA-FG-8191-01	TCGA-FG-8191-01	10.93	30	-11252		MALE	Oligodendroglioma	0.7	1.3	WITH TUMOR	G3		0.7	Supratentorial, Frontal Lobe	Central nervous system	FG Case Western	Brain
TCGA-DU-A76R-01	TCGA-DU-A76R-01	10.93	51	-18939	2739	MALE	Oligodendroglioma			WITH TUMOR	G3			Supratentorial, Frontal Lobe	Central nervous system	DU Henry Ford Hospital	Brain
TCGA-HT-A61C-01	TCGA-HT-A61C-01	10.94	66	-24276	56	MALE	Oligodendroglioma			WITH TUMOR	G3			Supratentorial, Temporal Lobe	Central nervous system	HT Case Western - St Joes
TCGA-HT-7620-01	TCGA-HT-7620-01	10.97	40	-14659		MALE	Oligodendroglioma	1.1	3.7	TUMOR FREE	G3		0.6	Supratentorial, Frontal Lobe	Central nervous system	HT Case Western - St Joes
TCGA-DH-A669-02	TCGA-DH-A669-02	11.01	70	-25809	2274	MALE	Oligodendroglioma			TUMOR FREE	G3			Supratentorial, Parietal Lobe	Central nervous system	DH University of Florida	Brain
TCGA-HW-A5KJ-01	TCGA-HW-A5KJ-01	11.05	68	-24966		MALE	Oligodendroglioma			WITH TUMOR	G3			Supratentorial, Frontal Lobe	Central nervous system	HW MSKCC
TCGA-P5-A72U-01	TCGA-P5-A72U-01	11.06	71	-26002	196	FEMALE	Oligodendroglioma			TUMOR FREE	G3			Supratentorial, Parietal Lobe	Central nervous system	P5 Cureline	Brain
TCGA-DU-6404-02	TCGA-DU-6404-02	11.13	24	-9021	4892	FEMALE	Oligodendroglioma			WITH TUMOR	G3			Supratentorial, Frontal Lobe	Central nervous system	DU Henry Ford Hospital	Brain
TCGA-HT-7469-01	TCGA-HT-7469-01	11.15	30	-11097		MALE	Oligodendroglioma	1	1.5	WITH TUMOR	G3		1	Supratentorial, Temporal Lobe	Central nervous system	HT Case Western - St Joes
TCGA-QH-A6CU-01	TCGA-QH-A6CU-01	11.22	52	-19149	59	FEMALE	Oligodendroglioma			TUMOR FREE	G3			Supratentorial, Frontal Lobe	Central nervous system	QH Fondazione-Besta	Brain
TCGA-DU-A76L-01	TCGA-DU-A76L-01	11.29	54	-19823	4769	MALE	Oligodendroglioma			WITH TUMOR	G3			Supratentorial, Temporal Lobe	Central nervous system	DU Henry Ford Hospital	Brain
TCGA-P5-A5EX-01	TCGA-P5-A5EX-01	11.32	41	-15091	65	FEMALE	Oligodendroglioma			TUMOR FREE	G3			Supratentorial, Frontal Lobe	Central nervous system	P5 Cureline	Brain
TCGA-HT-7882-01	TCGA-HT-7882-01	11.32	66	-24450		MALE	Oligodendroglioma			WITH TUMOR	G3			Supratentorial, Frontal Lobe	Central nervous system	HT Case Western - St Joes
TCGA-FG-6692-01	TCGA-FG-6692-01	11.49	63	-23374		MALE	Oligodendroglioma			WITH TUMOR	G3			Supratentorial, Frontal Lobe	Central nervous system	FG Case Western	Brain
TCGA-E1-A7YQ-01	TCGA-E1-A7YQ-01	11.58	58	-21341	4796	FEMALE	Oligodendroglioma			WITH TUMOR	G3			Supratentorial, Temporal Lobe	Central nervous system	E1 Duke
TCGA-DU-8165-01	TCGA-DU-8165-01	11.76	60	-21964		FEMALE	Oligodendroglioma			TUMOR FREE	G3			Supratentorial, Temporal Lobe	Central nervous system	DU Henry Ford Hospital	Brain
TCGA-DH-A669-01	TCGA-DH-A669-01	11.79	70	-25809		MALE	Oligodendroglioma			TUMOR FREE	G3			Supratentorial, Parietal Lobe	Central nervous system	DH University of Florida	Brain
TCGA-DU-A5TT-01	TCGA-DU-A5TT-01	11.82	70	-25726	24	MALE	Oligodendroglioma			WITH TUMOR	G3			Supratentorial, Frontal Lobe	Central nervous system	DU Henry Ford Hospital	Brain

## Sheet: Astrocytoma_low
sample	samples	C20orf30	age_at_initial_pathologic_diagnosis	days_to_birth	days_to_collection	gender	histological_type	intermediate_dimension	longest_dimension	person_neoplasm_cancer_status	neoplasm_histologic_grade	new_neoplasm_event_type	shortest_dimension	tumor_location	tumor_tissue_site	tissue_source_site	_primary_site
TCGA-VM-A8CH-01	TCGA-VM-A8CH-01	10.21	24	-9005		FEMALE	Astrocytoma			TUMOR FREE	G2			Supratentorial, Frontal Lobe	Central nervous system	VM Huntsman Cancer Institute	Brain
TCGA-DB-A75M-01	TCGA-DB-A75M-01	10.21	47	-17289	189	MALE	Astrocytoma			TUMOR FREE	G2			Supratentorial, Parietal Lobe	Central nervous system	DB Mayo Clinic - Rochester
TCGA-P5-A735-01	TCGA-P5-A735-01	10.24	38	-14152		FEMALE	Astrocytoma			TUMOR FREE	G2			Supratentorial, Temporal Lobe	Central nervous system	P5 Cureline	Brain
TCGA-DU-A76O-01	TCGA-DU-A76O-01	10.25	30	-10960	138	MALE	Astrocytoma			WITH TUMOR	G2			Supratentorial, Frontal Lobe	Central nervous system	DU Henry Ford Hospital	Brain
TCGA-HT-7884-01	TCGA-HT-7884-01	10.25	44	-16280		FEMALE	Astrocytoma			TUMOR FREE	G2			Supratentorial, Frontal Lobe	Central nervous system	HT Case Western - St Joes
TCGA-P5-A5EW-01	TCGA-P5-A5EW-01	10.26	20	-7612		FEMALE	Astrocytoma			TUMOR FREE	G2			Supratentorial, Frontal Lobe	Central nervous system	P5 Cureline	Brain
TCGA-S9-A6WO-01	TCGA-S9-A6WO-01	10.29	29	-10933		MALE	Astrocytoma			WITH TUMOR	G2			Supratentorial, Frontal Lobe	Central nervous system	S9 Dept of Neurosurgery at University of Heidelberg	Brain
TCGA-WY-A859-01	TCGA-WY-A859-01	10.29	34	-12631		FEMALE	Astrocytoma			WITH TUMOR	G2			Supratentorial, Frontal Lobe	Central nervous system	WY Johns Hopkins	Brain
TCGA-S9-A6TZ-01	TCGA-S9-A6TZ-01	10.33	39	-14592		FEMALE	Astrocytoma			WITH TUMOR	G2			Supratentorial, Frontal Lobe	Central nervous system	S9 Dept of Neurosurgery at University of Heidelberg	Brain
TCGA-TQ-A7RV-01	TCGA-TQ-A7RV-01	10.34	27	-10167	1470	MALE	Astrocytoma			WITH TUMOR	G2			Supratentorial, Temporal Lobe	Central nervous system	TQ University of Sao Paulo	Brain
TCGA-E1-A7Z3-01	TCGA-E1-A7Z3-01	10.34	31	-11330	7912	FEMALE	Astrocytoma			WITH TUMOR	G2			Supratentorial, Parietal Lobe	Central nervous system	E1 Duke
TCGA-CS-6667-01	TCGA-CS-6667-01	10.35	39	-14375		FEMALE	Astrocytoma	0.6	0.6	WITH TUMOR	G2		0.2	Supratentorial, Parietal Lobe	Central nervous system	CS Thomas Jefferson University	Brain
TCGA-DB-A75P-01	TCGA-DB-A75P-01	10.36	25	-9413		FEMALE	Astrocytoma			TUMOR FREE	G2			Supratentorial, Temporal Lobe	Central nervous system	DB Mayo Clinic - Rochester
TCGA-DU-A7TC-01	TCGA-DU-A7TC-01	10.41	32	-11884		MALE	Astrocytoma			WITH TUMOR	G2			Supratentorial, Frontal Lobe	Central nervous system	DU Henry Ford Hospital	Brain
TCGA-TM-A7CA-01	TCGA-TM-A7CA-01	10.42	44	-16415	830	MALE	Astrocytoma			TUMOR FREE	G2			Supratentorial, Frontal Lobe	Central nervous system	TM The University of New South Wales	Brain
TCGA-TQ-A7RV-02	TCGA-TQ-A7RV-02	10.43	27	-10167	1544	MALE	Astrocytoma			WITH TUMOR	G2			Supratentorial, Temporal Lobe	Central nervous system	TQ University of Sao Paulo	Brain
TCGA-S9-A6U5-01	TCGA-S9-A6U5-01	10.43	33	-12417		MALE	Astrocytoma			TUMOR FREE	G2			Supratentorial, Temporal Lobe	Central nervous system	S9 Dept of Neurosurgery at University of Heidelberg	Brain
TCGA-HW-A5KL-01	TCGA-HW-A5KL-01	10.45	42	-15513		FEMALE	Astrocytoma			WITH TUMOR	G2			Supratentorial, Temporal Lobe	Central nervous system	HW MSKCC
TCGA-TM-A7CF-01	TCGA-TM-A7CF-01	10.47	41	-15178	1453	FEMALE	Astrocytoma			WITH TUMOR	G2			Supratentorial, Frontal Lobe	Central nervous system	TM The University of New South Wales	Brain
TCGA-WY-A85A-01	TCGA-WY-A85A-01	10.48	20	-7380	1203	MALE	Astrocytoma			TUMOR FREE	G2			Supratentorial, Frontal Lobe	Central nervous system	WY Johns Hopkins	Brain
TCGA-TM-A7C4-01	TCGA-TM-A7C4-01	10.49	39	-14603	1215	FEMALE	Astrocytoma			TUMOR FREE	G2			Supratentorial, Temporal Lobe	Central nervous system	TM The University of New South Wales	Brain
TCGA-S9-A6U8-01	TCGA-S9-A6U8-01	10.51	24	-9044	2962	MALE	Astrocytoma			WITH TUMOR	G2			Supratentorial, Temporal Lobe	Central nervous system	S9 Dept of Neurosurgery at University of Heidelberg	Brain
TCGA-P5-A5EV-01	TCGA-P5-A5EV-01	10.51	39	-14310		MALE	Astrocytoma			WITH TUMOR	G2			Supratentorial, Temporal Lobe	Central nervous system	P5 Cureline	Brain
TCGA-WY-A85C-01	TCGA-WY-A85C-01	10.52	36	-13506	1119	MALE	Astrocytoma			WITH TUMOR	G2			Supratentorial, Frontal Lobe	Central nervous system	WY Johns Hopkins	Brain
TCGA-HT-A616-01	TCGA-HT-A616-01	10.54	36	-13222	70	FEMALE	Astrocytoma				G2			Supratentorial, Frontal Lobe	Central nervous system	HT Case Western - St Joes
TCGA-FG-A60L-01	TCGA-FG-A60L-01	10.55	34	-12580		FEMALE	Astrocytoma			TUMOR FREE	G2			Supratentorial, Temporal Lobe	Central nervous system	FG Case Western	Brain
TCGA-S9-A6TU-01	TCGA-S9-A6TU-01	10.55	38	-14108		MALE	Astrocytoma			WITH TUMOR	G2			Supratentorial, Temporal Lobe	Central nervous system	S9 Dept of Neurosurgery at University of Heidelberg	Brain
TCGA-E1-A7Z6-01	TCGA-E1-A7Z6-01	10.56	41	-14985	1588	FEMALE	Astrocytoma			WITH TUMOR	G2			Supratentorial, Frontal Lobe	Central nervous system	E1 Duke
TCGA-S9-A7R3-01	TCGA-S9-A7R3-01	10.6	28	-10342	2706	FEMALE	Astrocytoma			TUMOR FREE	G2			Supratentorial, Frontal Lobe	Central nervous system	S9 Dept of Neurosurgery at University of Heidelberg	Brain
TCGA-TM-A7CF-02	TCGA-TM-A7CF-02	10.61	41	-15178	1453	FEMALE	Astrocytoma			WITH TUMOR	G2			Supratentorial, Frontal Lobe	Central nervous system	TM The University of New South Wales	Brain
TCGA-WY-A85B-01	TCGA-WY-A85B-01	10.62	24	-8817	1073	MALE	Astrocytoma			TUMOR FREE	G2			Supratentorial, Temporal Lobe	Central nervous system	WY Johns Hopkins	Brain
TCGA-HT-A5RB-01	TCGA-HT-A5RB-01	10.62	24	-8820	597	MALE	Astrocytoma				G2			Supratentorial, Frontal Lobe	Central nervous system	HT Case Western - St Joes
TCGA-TM-A84C-01	TCGA-TM-A84C-01	10.62	32	-11849	459	MALE	Astrocytoma			WITH TUMOR	G2			Posterior Fossa, Brain Stem	Central nervous system	TM The University of New South Wales	Brain
TCGA-HT-7858-01	TCGA-HT-7858-01	10.63	28	-10422		MALE	Astrocytoma	1.8	2.3	TUMOR FREE	G2		0.6	Supratentorial, Frontal Lobe	Central nervous system	HT Case Western - St Joes
TCGA-HT-7604-01	TCGA-HT-7604-01	10.68	50	-18443		MALE	Astrocytoma	1.2	1.7	TUMOR FREE	G2		0.4	Supratentorial, Frontal Lobe	Central nervous system	HT Case Western - St Joes
TCGA-HT-8015-01	TCGA-HT-8015-01	10.69	21	-7760	1483	MALE	Astrocytoma			TUMOR FREE	G2			Supratentorial, Temporal Lobe	Central nervous system	HT Case Western - St Joes
TCGA-HT-7476-01	TCGA-HT-7476-01	10.69	26	-9614		MALE	Astrocytoma			TUMOR FREE	G2			Supratentorial, Temporal Lobe	Central nervous system	HT Case Western - St Joes
TCGA-WH-A86K-01	TCGA-WH-A86K-01	10.7	65	-24055	112	MALE	Astrocytoma			WITH TUMOR	G2			Supratentorial, Frontal Lobe	Central nervous system	WH Greenville Health System	Brain
TCGA-FG-6691-01	TCGA-FG-6691-01	10.71	23	-8403		FEMALE	Astrocytoma	0.9	1.1	WITH TUMOR	G2		0.9	Supratentorial, Temporal Lobe	Central nervous system	FG Case Western	Brain
TCGA-TM-A84Q-01	TCGA-TM-A84Q-01	10.71	31	-11668	592	MALE	Astrocytoma			TUMOR FREE	G2			Supratentorial, Temporal Lobe	Central nervous system	TM The University of New South Wales	Brain
TCGA-HW-7490-01	TCGA-HW-7490-01	10.75	41	-15092		MALE	Astrocytoma			WITH TUMOR	G2			Supratentorial, Occipital Lobe	Central nervous system	HW MSKCC
TCGA-FG-A87N-01	TCGA-FG-A87N-01	9.522	37	-13606		FEMALE	Astrocytoma			WITH TUMOR	G3			Supratentorial, Frontal Lobe	Central nervous system	FG Case Western	Brain
TCGA-P5-A72X-01	TCGA-P5-A72X-01	10.04	21	-7913		MALE	Astrocytoma			TUMOR FREE	G3			Supratentorial, Temporal Lobe	Central nervous system	P5 Cureline	Brain
TCGA-DB-A4XD-01	TCGA-DB-A4XD-01	10.05	32	-11741		MALE	Astrocytoma			TUMOR FREE	G3			Supratentorial, Temporal Lobe	Central nervous system	DB Mayo Clinic - Rochester
TCGA-S9-A89V-01	TCGA-S9-A89V-01	10.06	70	-25570		MALE	Astrocytoma			WITH TUMOR	G3			Posterior Fossa, Cerebellum	Central nervous system	S9 Dept of Neurosurgery at University of Heidelberg	Brain
TCGA-DU-A6S7-01	TCGA-DU-A6S7-01	10.11	27	-10170		FEMALE	Astrocytoma			TUMOR FREE	G3			Supratentorial, Frontal Lobe	Central nervous system	DU Henry Ford Hospital	Brain
TCGA-HT-A4DS-01	TCGA-HT-A4DS-01	10.12	55	-20296	137	FEMALE	Astrocytoma			TUMOR FREE	G3			Supratentorial, Temporal Lobe	Central nervous system	HT Case Western - St Joes
TCGA-HW-8320-01	TCGA-HW-8320-01	10.13	36	-13503		MALE	Astrocytoma	1	1.7	WITH TUMOR	G3		1	Supratentorial, Parietal Lobe	Central nervous system	HW MSKCC
TCGA-S9-A7R8-01	TCGA-S9-A7R8-01	10.13	44	-16275	3282	FEMALE	Astrocytoma			WITH TUMOR	G3			Supratentorial, Frontal Lobe	Central nervous system	S9 Dept of Neurosurgery at University of Heidelberg	Brain
TCGA-DH-A7UV-01	TCGA-DH-A7UV-01	10.13	49	-18161		MALE	Astrocytoma			WITH TUMOR	G3			Supratentorial, Temporal Lobe	Central nervous system	DH University of Florida	Brain
TCGA-CS-5394-01	TCGA-CS-5394-01	10.14	40	-14920		MALE	Astrocytoma	0.7	1.2		G3		0.6	Supratentorial, Frontal Lobe	Central nervous system	CS Thomas Jefferson University	Brain
TCGA-HT-7855-01	TCGA-HT-7855-01	10.23	39	-14496		MALE	Astrocytoma	1.5	1.6	TUMOR FREE	G3		0.6	Supratentorial, Parietal Lobe	Central nervous system	HT Case Western - St Joes
TCGA-E1-A7YI-01	TCGA-E1-A7YI-01	10.23	33	-12229	2022	FEMALE	Astrocytoma			WITH TUMOR	G3			Supratentorial, Occipital Lobe	Central nervous system	E1 Duke
TCGA-DB-A4XB-01	TCGA-DB-A4XB-01	10.28	38	-13990		MALE	Astrocytoma			TUMOR FREE	G3			Supratentorial, Parietal Lobe	Central nervous system	DB Mayo Clinic - Rochester	Brain
TCGA-HT-8564-01	TCGA-HT-8564-01	10.3	47	-17499		MALE	Astrocytoma	0.4	0.7	WITH TUMOR	G3		0.3	Supratentorial, Temporal Lobe	Central nervous system	HT Case Western - St Joes	Brain
TCGA-S9-A7QW-01	TCGA-S9-A7QW-01	10.3	54	-19869		FEMALE	Astrocytoma			WITH TUMOR	G3			Supratentorial, Frontal Lobe	Central nervous system	S9 Dept of Neurosurgery at University of Heidelberg
TCGA-DB-A75L-01	TCGA-DB-A75L-01	10.31	36	-13338	75	FEMALE	Astrocytoma			TUMOR FREE	G3			Supratentorial, Frontal Lobe	Central nervous system	DB Mayo Clinic - Rochester	Brain
TCGA-S9-A6U6-01	TCGA-S9-A6U6-01	10.36	28	-10253		MALE	Astrocytoma			TUMOR FREE	G3			Supratentorial, Temporal Lobe	Central nervous system	S9 Dept of Neurosurgery at University of Heidelberg
TCGA-HW-8321-01	TCGA-HW-8321-01	10.4	31	-11474		MALE	Astrocytoma	1	1.6	WITH TUMOR	G3		0.5	Supratentorial, Frontal Lobe	Central nervous system	HW MSKCC
TCGA-DB-A75O-01	TCGA-DB-A75O-01	10.43	29	-10812	981	MALE	Astrocytoma				G3			Supratentorial, Frontal Lobe	Central nervous system	DB Mayo Clinic - Rochester
TCGA-S9-A7R4-01	TCGA-S9-A7R4-01	10.43	46	-17134		MALE	Astrocytoma			WITH TUMOR	G3			Supratentorial, Frontal Lobe	Central nervous system	S9 Dept of Neurosurgery at University of Heidelberg
TCGA-DU-7299-01	TCGA-DU-7299-01	10.45	33	-12266		MALE	Astrocytoma	1	1	WITH TUMOR	G3		0.3	Supratentorial, Parietal Lobe	Central nervous system	DU Henry Ford Hospital	Brain
TCGA-RY-A843-01	TCGA-RY-A843-01	10.45	30	-11083	312	MALE	Astrocytoma			WITH TUMOR	G3			Supratentorial, Temporal Lobe	Central nervous system	RY University of California San Francisco	Brain
TCGA-S9-A7IZ-01	TCGA-S9-A7IZ-01	10.45	48	-17874		FEMALE	Astrocytoma			WITH TUMOR	G3			Supratentorial, Frontal Lobe	Central nervous system	S9 Dept of Neurosurgery at University of Heidelberg
TCGA-HW-8319-01	TCGA-HW-8319-01	10.46	34	-12557		FEMALE	Astrocytoma	1.2	1.3	WITH TUMOR	G3		0.6	Supratentorial, Frontal Lobe	Central nervous system	HW MSKCC
TCGA-P5-A781-01	TCGA-P5-A781-01	10.46	34	-12757	86	FEMALE	Astrocytoma			TUMOR FREE	G3			Supratentorial, Temporal Lobe	Central nervous system	P5 Cureline	Brain
TCGA-P5-A72W-01	TCGA-P5-A72W-01	10.48	35	-12848		MALE	Astrocytoma			TUMOR FREE	G3			Supratentorial, Frontal Lobe	Central nervous system	P5 Cureline	Brain
TCGA-DH-A7UU-01	TCGA-DH-A7UU-01	10.48	43	-16037		MALE	Astrocytoma			WITH TUMOR	G3			Supratentorial, Frontal Lobe	Central nervous system	DH University of Florida	Brain
TCGA-E1-A7YH-01	TCGA-E1-A7YH-01	10.5	47	-17465		FEMALE	Astrocytoma			WITH TUMOR	G3			Supratentorial, Temporal Lobe	Central nervous system	E1 Duke
TCGA-CS-6666-01	TCGA-CS-6666-01	10.51	22	-8340		MALE	Astrocytoma			TUMOR FREE	G3			Supratentorial, Parietal Lobe	Central nervous system	CS Thomas Jefferson University	Brain
TCGA-S9-A6U1-01	TCGA-S9-A6U1-01	10.53	22	-8271	260	FEMALE	Astrocytoma			TUMOR FREE	G3			Supratentorial, Frontal Lobe	Central nervous system	S9 Dept of Neurosurgery at University of Heidelberg
TCGA-S9-A7IS-01	TCGA-S9-A7IS-01	10.53	33	-12402	3506	FEMALE	Astrocytoma			WITH TUMOR	G3			Supratentorial, Frontal Lobe	Central nervous system	S9 Dept of Neurosurgery at University of Heidelberg
TCGA-DB-A64X-01	TCGA-DB-A64X-01	10.53	56	-20625		FEMALE	Astrocytoma			TUMOR FREE	G3			Supratentorial, Frontal Lobe	Central nervous system	DB Mayo Clinic - Rochester
TCGA-CS-5393-01	TCGA-CS-5393-01	10.54	39	-14418		MALE	Astrocytoma	1	1.6	TUMOR FREE	G3		0.3	Supratentorial, Temporal Lobe	Central nervous system	CS Thomas Jefferson University	Brain
TCGA-DU-A7TI-01	TCGA-DU-A7TI-01	10.54	32	-11906	5441	MALE	Astrocytoma			WITH TUMOR	G3			Supratentorial, Frontal Lobe	Central nervous system	DU Henry Ford Hospital	Brain
TCGA-S9-A6WL-01	TCGA-S9-A6WL-01	10.55	52	-19234		MALE	Astrocytoma			WITH TUMOR	G3			Supratentorial, Frontal Lobe	Central nervous system	S9 Dept of Neurosurgery at University of Heidelberg
TCGA-P5-A780-01	TCGA-P5-A780-01	10.56	44	-16161	92	FEMALE	Astrocytoma			TUMOR FREE	G3			Supratentorial, Temporal Lobe	Central nervous system	P5 Cureline	Brain
TCGA-TM-A84B-01	TCGA-TM-A84B-01	10.58	40	-14933		MALE	Astrocytoma			WITH TUMOR	G3			Supratentorial, Parietal Lobe	Central nervous system	TM The University of New South Wales	Brain
TCGA-FG-7636-01	TCGA-FG-7636-01	10.59	48	-17843		MALE	Astrocytoma	0.6	1.1	TUMOR FREE	G3		0.4	Supratentorial, Frontal Lobe	Central nervous system	FG Case Western	Brain
TCGA-E1-A7YE-01	TCGA-E1-A7YE-01	10.61	32	-11971		FEMALE	Astrocytoma			WITH TUMOR	G3			Supratentorial, Frontal Lobe	Central nervous system	E1 Duke
TCGA-FG-8185-01	TCGA-FG-8185-01	10.62	37	-13621		MALE	Astrocytoma			TUMOR FREE	G3			Supratentorial, Frontal Lobe	Central nervous system	FG Case Western	Brain
TCGA-DH-A66D-01	TCGA-DH-A66D-01	10.63	43	-15866		FEMALE	Astrocytoma			WITH TUMOR	G3			Supratentorial, Frontal Lobe	Central nervous system	DH University of Florida	Brain
TCGA-CS-4942-01	TCGA-CS-4942-01	10.63	44	-16297		FEMALE	Astrocytoma			WITH TUMOR	G3			Supratentorial, Frontal Lobe	Central nervous system	CS Thomas Jefferson University	Brain
TCGA-S9-A6TS-01	TCGA-S9-A6TS-01	10.64	48	-17857	2402	FEMALE	Astrocytoma			WITH TUMOR	G3			Supratentorial, Frontal Lobe	Central nervous system	S9 Dept of Neurosurgery at University of Heidelberg	Brain
TCGA-RY-A83Z-01	TCGA-RY-A83Z-01	10.64	54	-19903		FEMALE	Astrocytoma			WITH TUMOR	G3			Supratentorial, Frontal Lobe	Central nervous system	RY University of California San Francisco	Brain
TCGA-DU-7292-01	TCGA-DU-7292-01	10.64	69	-25266		MALE	Astrocytoma			WITH TUMOR	G3			Supratentorial, Temporal Lobe	Central nervous system	DU Henry Ford Hospital	Brain
TCGA-DU-A5TW-01	TCGA-DU-A5TW-01	10.67	33	-12107	42	FEMALE	Astrocytoma			WITH TUMOR	G3			Supratentorial, Frontal Lobe	Central nervous system	DU Henry Ford Hospital	Brain
TCGA-DH-A7UT-01	TCGA-DH-A7UT-01	10.68	30	-11014	118	MALE	Astrocytoma			WITH TUMOR	G3			Supratentorial, Frontal Lobe	Central nervous system	DH University of Florida	Brain
TCGA-DB-A4XF-01	TCGA-DB-A4XF-01	10.68	41	-15066	456	FEMALE	Astrocytoma			TUMOR FREE	G3			Supratentorial, Frontal Lobe	Central nervous system	DB Mayo Clinic - Rochester
TCGA-E1-5305-01	TCGA-E1-5305-01	10.7	34	-12655		MALE	Astrocytoma	0.8	1	WITH TUMOR	G3		0.4	Supratentorial, Frontal Lobe	Central nervous system	E1 Duke
TCGA-CS-6290-01	TCGA-CS-6290-01	10.71	31	-11666		MALE	Astrocytoma	0.4	0.4		G3		0.4	Supratentorial, Temporal Lobe	Central nervous system	CS Thomas Jefferson University	Brain
TCGA-HT-A5R7-01	TCGA-HT-A5R7-01	10.72	33	-12092	147	FEMALE	Astrocytoma			TUMOR FREE	G3			Supratentorial, Parietal Lobe	Central nervous system	HT Case Western - St Joes
TCGA-E1-5307-01	TCGA-E1-5307-01	10.73	62	-22837		FEMALE	Astrocytoma	1	1.3	WITH TUMOR	G3		0.6	Supratentorial, Temporal Lobe	Central nervous system	E1 Duke
TCGA-S9-A7QX-01	TCGA-S9-A7QX-01	10.73	36	-13332	81	FEMALE	Astrocytoma			WITH TUMOR	G3			Supratentorial, Temporal Lobe	Central nervous system	S9 Dept of Neurosurgery at University of Heidelberg
TCGA-DU-A5TP-01	TCGA-DU-A5TP-01	10.74	33	-12111	301	MALE	Astrocytoma			TUMOR FREE	G3			Supratentorial, Parietal Lobe	Central nervous system	DU Henry Ford Hospital	Brain
TCGA-S9-A6U9-01	TCGA-S9-A6U9-01	10.74	36	-13460	2706	MALE	Astrocytoma			WITH TUMOR	G3			Supratentorial, Frontal Lobe	Central nervous system	S9 Dept of Neurosurgery at University of Heidelberg
TCGA-DU-7298-01	TCGA-DU-7298-01	10.75	38	-14205		FEMALE	Astrocytoma	0.7	1	WITH TUMOR	G3		0.5	Supratentorial, Temporal Lobe	Central nervous system	DU Henry Ford Hospital	Brain

## Sheet: Astrocytoma_high
sample	samples	C20orf30	age_at_initial_pathologic_diagnosis	days_to_birth	days_to_collection	gender	histological_type	intermediate_dimension	longest_dimension	person_neoplasm_cancer_status	neoplasm_histologic_grade	new_neoplasm_event_type	shortest_dimension	tumor_location	tumor_tissue_site	tissue_source_site	_primary_site
TCGA-CS-4938-01	TCGA-CS-4938-01	10.76	31	-11509		FEMALE	Astrocytoma	0.6	1.5	WITH TUMOR	G2		0.3	Supratentorial, Frontal Lobe	Central nervous system	CS Thomas Jefferson University	Brain
TCGA-HT-7485-01	TCGA-HT-7485-01	10.77	42	-15589		MALE	Astrocytoma	1.1	1.6	TUMOR FREE	G2		0.7	Supratentorial, Parietal Lobe	Central nervous system	HT Case Western - St Joes
TCGA-HW-7493-01	TCGA-HW-7493-01	10.79	40	-14767		FEMALE	Astrocytoma	0.8	1.1	WITH TUMOR	G2		0.7	Supratentorial, Temporal Lobe	Central nervous system	HW MSKCC
TCGA-HW-A5KM-01	TCGA-HW-A5KM-01	10.8	35	-12845	139	MALE	Astrocytoma			WITH TUMOR	G2			Supratentorial, Frontal Lobe	Central nervous system	HW MSKCC
TCGA-P5-A5F2-01	TCGA-P5-A5F2-01	10.8	36	-13396	48	FEMALE	Astrocytoma			WITH TUMOR	G2			Supratentorial, Frontal Lobe	Central nervous system	P5 Cureline	Brain
TCGA-HT-7606-01	TCGA-HT-7606-01	10.81	30	-11233		FEMALE	Astrocytoma			TUMOR FREE	G2			Supratentorial, Frontal Lobe	Central nervous system	HT Case Western - St Joes
TCGA-HT-7607-01	TCGA-HT-7607-01	10.81	61	-22585		FEMALE	Astrocytoma			WITH TUMOR	G2			Supratentorial, Frontal Lobe	Central nervous system	HT Case Western - St Joes
TCGA-FG-6689-01	TCGA-FG-6689-01	10.84	30	-11312		MALE	Astrocytoma	1	1	WITH TUMOR	G2		1	Supratentorial, Frontal Lobe	Central nervous system	FG Case Western	Brain
TCGA-FG-A4MX-01	TCGA-FG-A4MX-01	10.86	47	-17381		MALE	Astrocytoma			TUMOR FREE	G2			Supratentorial, Frontal Lobe	Central nervous system	FG Case Western	Brain
TCGA-VM-A8C9-01	TCGA-VM-A8C9-01	10.9	37	-13663		FEMALE	Astrocytoma			TUMOR FREE	G2			Supratentorial, Temporal Lobe	Central nervous system	VM Huntsman Cancer Institute	Brain
TCGA-F6-A8O4-01	TCGA-F6-A8O4-01	10.93	44	-16202		MALE	Astrocytoma			TUMOR FREE	G2			Supratentorial, Frontal Lobe	Central nervous system	F6 Asterand	Brain
TCGA-CS-4944-01	TCGA-CS-4944-01	11.06	50	-18494		MALE	Astrocytoma	0.7	1	WITH TUMOR	G2		0.3	Supratentorial, Temporal Lobe	Central nervous system	CS Thomas Jefferson University	Brain
TCGA-P5-A5EY-01	TCGA-P5-A5EY-01	11.11	21	-7716		MALE	Astrocytoma				G2			Supratentorial, Temporal Lobe	Central nervous system	P5 Cureline	Brain
TCGA-P5-A733-01	TCGA-P5-A733-01	11.11	52	-19142	134	FEMALE	Astrocytoma			TUMOR FREE	G2			Supratentorial, Frontal Lobe	Central nervous system	P5 Cureline	Brain
TCGA-HT-7478-01	TCGA-HT-7478-01	11.17	36	-13216		MALE	Astrocytoma			TUMOR FREE	G2			Supratentorial, Frontal Lobe	Central nervous system	HT Case Western - St Joes
TCGA-P5-A5F1-01	TCGA-P5-A5F1-01	11.2	30	-11070		MALE	Astrocytoma			TUMOR FREE	G2			Supratentorial, Temporal Lobe	Central nervous system	P5 Cureline	Brain
TCGA-HT-7854-01	TCGA-HT-7854-01	11.22	62	-22738		MALE	Astrocytoma	1.1	1.5	TUMOR FREE	G2		0.6	Supratentorial, Temporal Lobe	Central nervous system	HT Case Western - St Joes
TCGA-E1-A7Z4-01	TCGA-E1-A7Z4-01	11.23	35	-12849		MALE	Astrocytoma			WITH TUMOR	G2			Supratentorial, Frontal Lobe	Central nervous system	E1 Duke
TCGA-HT-7691-01	TCGA-HT-7691-01	11.24	31	-11465		FEMALE	Astrocytoma	1	1.4	TUMOR FREE	G2		0.8	Supratentorial, Not Otherwise Specified	Central nervous system	HT Case Western - St Joes	Brain
TCGA-DU-A5TU-01	TCGA-DU-A5TU-01	11.34	62	-22811		FEMALE	Astrocytoma			WITH TUMOR	G2			Supratentorial, Frontal Lobe	Central nervous system	DU Henry Ford Hospital	Brain
TCGA-S9-A7R7-01	TCGA-S9-A7R7-01	11.45	27	-10108	2647	MALE	Astrocytoma			WITH TUMOR	G2			Supratentorial, Frontal Lobe	Central nervous system	S9 Dept of Neurosurgery at University of Heidelberg
TCGA-HT-7680-01	TCGA-HT-7680-01	11.5	32	-11970		FEMALE	Astrocytoma	1	1.6	TUMOR FREE	G2		0.5	Posterior Fossa, Cerebellum	Central nervous system	HT Case Western - St Joes
TCGA-QH-A6CX-01	TCGA-QH-A6CX-01	11.53	66	-24252		MALE	Astrocytoma			WITH TUMOR	G2			Supratentorial, Temporal Lobe	Central nervous system	QH Fondazione-Besta	Brain
TCGA-DU-7007-01	TCGA-DU-7007-01	11.89	33	-12245		MALE	Astrocytoma	1	1		G2		0.6	Supratentorial, Frontal Lobe	Central nervous system	DU Henry Ford Hospital	Brain
TCGA-S9-A6WG-01	TCGA-S9-A6WG-01	10.75	31	-11509	2098	MALE	Astrocytoma			WITH TUMOR	G3			Supratentorial, Frontal Lobe	Central nervous system	S9 Dept of Neurosurgery at University of Heidelberg
TCGA-DB-5273-01	TCGA-DB-5273-01	10.76	33	-12152		MALE	Astrocytoma			TUMOR FREE	G3			Supratentorial, Frontal Lobe	Central nervous system	DB Mayo Clinic - Rochester
TCGA-CS-4943-01	TCGA-CS-4943-01	10.77	37	-13565		MALE	Astrocytoma	0.5	0.6	WITH TUMOR	G3		0.1	Supratentorial, Frontal Lobe	Central nervous system	CS Thomas Jefferson University	Brain
TCGA-DH-5142-01	TCGA-DH-5142-01	10.77	29	-10678		MALE	Astrocytoma			WITH TUMOR	G3			Supratentorial, Frontal Lobe	Central nervous system	DH University of Florida	Brain
TCGA-S9-A7IX-01	TCGA-S9-A7IX-01	10.77	57	-21095	540	MALE	Astrocytoma			WITH TUMOR	G3			Supratentorial, Temporal Lobe	Central nervous system	S9 Dept of Neurosurgery at University of Heidelberg
TCGA-E1-A7YD-01	TCGA-E1-A7YD-01	10.84	57	-21020	5445	MALE	Astrocytoma			WITH TUMOR	G3			Supratentorial, Temporal Lobe	Central nervous system	E1 Duke
TCGA-VM-A8CD-01	TCGA-VM-A8CD-01	10.84	58	-21200	517	MALE	Astrocytoma			WITH TUMOR	G3			Supratentorial, Temporal Lobe	Central nervous system	VM Huntsman Cancer Institute	Brain
TCGA-HT-A61B-01	TCGA-HT-A61B-01	10.85	22	-8335	101	MALE	Astrocytoma			TUMOR FREE	G3			Supratentorial, Temporal Lobe	Central nervous system	HT Case Western - St Joes
TCGA-VV-A86M-01	TCGA-VV-A86M-01	10.85	36	-13453		FEMALE	Astrocytoma			TUMOR FREE	G3			Supratentorial, Frontal Lobe	Central nervous system	VV John Wayne Cancer Center	Brain
TCGA-KT-A7W1-01	TCGA-KT-A7W1-01	10.85	45	-16560		FEMALE	Astrocytoma			TUMOR FREE	G3			Supratentorial, Frontal Lobe	Central nervous system	KT Hartford	Brain
TCGA-TM-A84F-01	TCGA-TM-A84F-01	10.89	48	-17744	1471	MALE	Astrocytoma			TUMOR FREE	G3			Supratentorial, Frontal Lobe	Central nervous system	TM The University of New South Wales	Brain
TCGA-P5-A736-01	TCGA-P5-A736-01	10.9	44	-16300	126	FEMALE	Astrocytoma			TUMOR FREE	G3			Supratentorial, Parietal Lobe	Central nervous system	P5 Cureline	Brain
TCGA-DU-A7TJ-01	TCGA-DU-A7TJ-01	10.9	55	-20394	29	MALE	Astrocytoma			WITH TUMOR	G3			Supratentorial, Temporal Lobe	Central nervous system	DU Henry Ford Hospital	Brain
TCGA-E1-5302-01	TCGA-E1-5302-01	10.91	41	-15230		MALE	Astrocytoma	0.7	1.1	WITH TUMOR	G3		0.3	Supratentorial, Frontal Lobe	Central nervous system	E1 Duke
TCGA-HT-A74O-01	TCGA-HT-A74O-01	10.93	34	-12460	124	MALE	Astrocytoma				G3			Supratentorial, Temporal Lobe	Central nervous system	HT Case Western - St Joes
TCGA-VM-A8CF-01	TCGA-VM-A8CF-01	10.93	44	-16334	280	FEMALE	Astrocytoma			TUMOR FREE	G3			Supratentorial, Frontal Lobe	Central nervous system	VM Huntsman Cancer Institute	Brain
TCGA-FG-5963-01	TCGA-FG-5963-01	10.94	23	-8571		MALE	Astrocytoma			WITH TUMOR	G3			Supratentorial, Frontal Lobe	Central nervous system	FG Case Western	Brain
TCGA-WY-A858-01	TCGA-WY-A858-01	10.94	32	-11855		FEMALE	Astrocytoma			TUMOR FREE	G3			Supratentorial, Frontal Lobe	Central nervous system	WY Johns Hopkins	Brain
TCGA-HT-7601-01	TCGA-HT-7601-01	10.96	30	-10989		FEMALE	Astrocytoma	1	2.7	TUMOR FREE	G3		0.9	Supratentorial, Frontal Lobe	Central nervous system	HT Case Western - St Joes
TCGA-DU-7010-01	TCGA-DU-7010-01	10.97	58	-21199		FEMALE	Astrocytoma	1	1.1	WITH TUMOR	G3		0.5	Supratentorial, Frontal Lobe	Central nervous system	DU Henry Ford Hospital	Brain
TCGA-DU-6392-01	TCGA-DU-6392-01	10.97	35	-12836		FEMALE	Astrocytoma			TUMOR FREE	G3			Supratentorial, Parietal Lobe	Central nervous system	DU Henry Ford Hospital	Brain
TCGA-S9-A6UA-01	TCGA-S9-A6UA-01	10.98	66	-24242	1989	MALE	Astrocytoma			WITH TUMOR	G3			Supratentorial, Temporal Lobe	Central nervous system	S9 Dept of Neurosurgery at University of Heidelberg
TCGA-DU-6405-01	TCGA-DU-6405-01	11.01	51	-18686		FEMALE	Astrocytoma			WITH TUMOR	G3			Supratentorial, Frontal Lobe	Central nervous system	DU Henry Ford Hospital	Brain
TCGA-HT-7477-01	TCGA-HT-7477-01	11.03	62	-22948	417	MALE	Astrocytoma			TUMOR FREE	G3			Supratentorial, Frontal Lobe	Central nervous system	HT Case Western - St Joes
TCGA-E1-5303-01	TCGA-E1-5303-01	11.04	38	-14212		MALE	Astrocytoma	0.6	0.8	WITH TUMOR	G3		0.6	Supratentorial, Frontal Lobe	Central nervous system	E1 Duke
TCGA-TM-A84I-01	TCGA-TM-A84I-01	11.04	30	-11221		MALE	Astrocytoma			TUMOR FREE	G3			Supratentorial, Parietal Lobe	Central nervous system	TM The University of New South Wales	Brain
TCGA-QH-A6XC-01	TCGA-QH-A6XC-01	11.04	48	-17692		MALE	Astrocytoma			WITH TUMOR	G3			Supratentorial, Frontal Lobe	Central nervous system	QH Fondazione-Besta	Brain
TCGA-P5-A5EZ-01	TCGA-P5-A5EZ-01	11.05	39	-14375	65	MALE	Astrocytoma			TUMOR FREE	G3			Supratentorial, Frontal Lobe	Central nervous system	P5 Cureline	Brain
TCGA-HT-7686-01	TCGA-HT-7686-01	11.06	29	-10724		FEMALE	Astrocytoma	0.9	2	TUMOR FREE	G3		0.6	Supratentorial, Parietal Lobe	Central nervous system	HT Case Western - St Joes
TCGA-DU-7013-01	TCGA-DU-7013-01	11.06	59	-21824		MALE	Astrocytoma	1	1	WITH TUMOR	G3		0.5	Supratentorial, Temporal Lobe	Central nervous system	DU Henry Ford Hospital	Brain
TCGA-E1-A7YN-01	TCGA-E1-A7YN-01	11.06	63	-23180		FEMALE	Astrocytoma			WITH TUMOR	G3			Supratentorial, Temporal Lobe	Central nervous system	E1 Duke
TCGA-HT-A5RA-01	TCGA-HT-A5RA-01	11.06	65	-23769	385	FEMALE	Astrocytoma			WITH TUMOR	G3			Supratentorial, Temporal Lobe	Central nervous system	HT Case Western - St Joes
TCGA-P5-A5EU-01	TCGA-P5-A5EU-01	11.07	35	-12851		MALE	Astrocytoma				G3			Supratentorial, Frontal Lobe	Central nervous system	P5 Cureline	Brain
TCGA-DU-5847-01	TCGA-DU-5847-01	11.08	34	-12606		FEMALE	Astrocytoma	0.8	1	WITH TUMOR	G3		0.4	Supratentorial, Frontal Lobe	Central nervous system	DU Henry Ford Hospital	Brain
TCGA-E1-A7YM-01	TCGA-E1-A7YM-01	11.1	63	-23263		MALE	Astrocytoma			WITH TUMOR	G3			Supratentorial, Temporal Lobe	Central nervous system	E1 Duke
TCGA-DB-5277-01	TCGA-DB-5277-01	11.11	34	-12725		MALE	Astrocytoma	1	1.5	WITH TUMOR	G3		0.1	Supratentorial, Frontal Lobe	Central nervous system	DB Mayo Clinic - Rochester
TCGA-HT-7479-01	TCGA-HT-7479-01	11.12	44	-16137		MALE	Astrocytoma	0.8	1	TUMOR FREE	G3		0.6	Supratentorial, Frontal Lobe	Central nervous system	HT Case Western - St Joes
TCGA-HT-8110-01	TCGA-HT-8110-01	11.12	57	-21183		MALE	Astrocytoma	0.9	1.6	TUMOR FREE	G3		0.9	Supratentorial, Parietal Lobe	Central nervous system	HT Case Western - St Joes
TCGA-DU-7012-01	TCGA-DU-7012-01	11.12	74	-27039		FEMALE	Astrocytoma	1	1.1	WITH TUMOR	G3		0.9	Supratentorial, Temporal Lobe	Central nervous system	DU Henry Ford Hospital	Brain
TCGA-HT-7860-01	TCGA-HT-7860-01	11.12	60	-22034		FEMALE	Astrocytoma	1.1	1.1	TUMOR FREE	G3		0.6	Supratentorial, Frontal Lobe	Central nervous system	HT Case Western - St Joes
TCGA-CS-4941-01	TCGA-CS-4941-01	11.15	67	-24578		MALE	Astrocytoma			WITH TUMOR	G3			Supratentorial, Frontal Lobe	Central nervous system	CS Thomas Jefferson University	Brain
TCGA-FG-A87Q-01	TCGA-FG-A87Q-01	11.18	61	-22565		FEMALE	Astrocytoma			TUMOR FREE	G3			Supratentorial, Parietal Lobe	Central nervous system	FG Case Western	Brain
TCGA-HT-8563-01	TCGA-HT-8563-01	11.2	30	-11305		FEMALE	Astrocytoma	0.6	0.7	TUMOR FREE	G3		0.2	Supratentorial, Frontal Lobe	Central nervous system	HT Case Western - St Joes
TCGA-HT-8104-01	TCGA-HT-8104-01	11.22	51	-18748		FEMALE	Astrocytoma	0.7	1.3	TUMOR FREE	G3		0.7	Supratentorial, Frontal Lobe	Central nervous system	HT Case Western - St Joes
TCGA-E1-5304-01	TCGA-E1-5304-01	11.22	42	-15481		MALE	Astrocytoma			WITH TUMOR	G3			Supratentorial, Frontal Lobe	Central nervous system	E1 Duke
TCGA-FG-6688-01	TCGA-FG-6688-01	11.23	59	-21745		FEMALE	Astrocytoma	1	1	WITH TUMOR	G3		0.8	Supratentorial, Parietal Lobe	Central nervous system	FG Case Western	Brain
TCGA-S9-A6WM-01	TCGA-S9-A6WM-01	11.23	59	-21761		FEMALE	Astrocytoma			WITH TUMOR	G3			Supratentorial, Temporal Lobe	Central nervous system	S9 Dept of Neurosurgery at University of Heidelberg
TCGA-HT-A618-01	TCGA-HT-A618-01	11.24	37	-13595	71	FEMALE	Astrocytoma			TUMOR FREE	G3			Supratentorial, Temporal Lobe	Central nervous system	HT Case Western - St Joes
TCGA-DU-6402-01	TCGA-DU-6402-01	11.26	52	-19207		MALE	Astrocytoma	1	1.5	WITH TUMOR	G3		0.5	Supratentorial, Frontal Lobe	Central nervous system	DU Henry Ford Hospital	Brain
TCGA-HT-8106-01	TCGA-HT-8106-01	11.27	53	-19555		MALE	Astrocytoma	0.9	1.2	TUMOR FREE	G3		0.5	Supratentorial, Frontal Lobe	Central nervous system	HT Case Western - St Joes
TCGA-CS-6665-01	TCGA-CS-6665-01	11.27	51	-18977		FEMALE	Astrocytoma			WITH TUMOR	G3			Supratentorial, Temporal Lobe	Central nervous system	CS Thomas Jefferson University	Brain
TCGA-HT-8011-01	TCGA-HT-8011-01	11.29	55	-20175		MALE	Astrocytoma	1	1.3	WITH TUMOR	G3		0.6	Supratentorial, Temporal Lobe	Central nervous system	HT Case Western - St Joes
TCGA-S9-A6WN-01	TCGA-S9-A6WN-01	11.29	38	-13961	181	FEMALE	Astrocytoma			WITH TUMOR	G3			Supratentorial, Frontal Lobe	Central nervous system	S9 Dept of Neurosurgery at University of Heidelberg
TCGA-FG-A6J3-01	TCGA-FG-A6J3-01	11.29	52	-19138		FEMALE	Astrocytoma			WITH TUMOR	G3			Supratentorial, Frontal Lobe	Central nervous system	FG Case Western	Brain
TCGA-E1-A7YK-01	TCGA-E1-A7YK-01	11.29	52	-19236		MALE	Astrocytoma				G3			Supratentorial, Temporal Lobe	Central nervous system	E1 Duke
TCGA-DU-8158-01	TCGA-DU-8158-01	11.3	57	-21129		FEMALE	Astrocytoma			WITH TUMOR	G3			Supratentorial, Frontal Lobe	Central nervous system	DU Henry Ford Hospital	Brain
TCGA-DU-7006-01	TCGA-DU-7006-01	11.32	60	-21990		FEMALE	Astrocytoma	0.8	1	WITH TUMOR	G3		0.4	Supratentorial, Temporal Lobe	Central nervous system	DU Henry Ford Hospital	Brain
TCGA-S9-A6U0-01	TCGA-S9-A6U0-01	11.32	46	-16890		MALE	Astrocytoma			WITH TUMOR	G3			Supratentorial, Temporal Lobe	Central nervous system	S9 Dept of Neurosurgery at University of Heidelberg	Brain
TCGA-FG-5963-02	TCGA-FG-5963-02	11.33	23	-8571	1095	MALE	Astrocytoma			WITH TUMOR	G3			Supratentorial, Frontal Lobe	Central nervous system	FG Case Western	Brain
TCGA-HT-7857-01	TCGA-HT-7857-01	11.34	24	-8912		FEMALE	Astrocytoma	1	2.3	TUMOR FREE	G3		0.3	Supratentorial, Not Otherwise Specified	Central nervous system	HT Case Western - St Joes
TCGA-HW-A5KK-01	TCGA-HW-A5KK-01	11.34	64	-23484		MALE	Astrocytoma			WITH TUMOR	G3			Supratentorial, Temporal Lobe	Central nervous system	HW MSKCC	Brain
TCGA-S9-A7R2-01	TCGA-S9-A7R2-01	11.34	69	-25419	2027	MALE	Astrocytoma			WITH TUMOR	G3			Supratentorial, Temporal Lobe	Central nervous system	S9 Dept of Neurosurgery at University of Heidelberg
TCGA-S9-A89Z-01	TCGA-S9-A89Z-01	11.35	40	-14858	63	MALE	Astrocytoma			WITH TUMOR	G3			Supratentorial, Frontal Lobe	Central nervous system	S9 Dept of Neurosurgery at University of Heidelberg
TCGA-DU-7290-01	TCGA-DU-7290-01	11.36	45	-16667		FEMALE	Astrocytoma			WITH TUMOR	G3			Supratentorial, Temporal Lobe	Central nervous system	DU Henry Ford Hospital	Brain
TCGA-DH-A66B-01	TCGA-DH-A66B-01	11.37	52	-19156	845	MALE	Astrocytoma			WITH TUMOR	G3			Supratentorial, Temporal Lobe	Central nervous system	DH University of Florida	Brain
TCGA-E1-A7YJ-01	TCGA-E1-A7YJ-01	11.41	55	-20180		MALE	Astrocytoma			WITH TUMOR	G3			Supratentorial, Frontal Lobe	Central nervous system	E1 Duke
TCGA-DU-5854-01	TCGA-DU-5854-01	11.44	57	-21106		FEMALE	Astrocytoma	0.9	1	WITH TUMOR	G3		0.7	Supratentorial, Frontal Lobe	Central nervous system	DU Henry Ford Hospital	Brain
TCGA-VW-A8FI-01	TCGA-VW-A8FI-01	11.48	66	-24411	154	MALE	Astrocytoma			WITH TUMOR	G3			Supratentorial, Temporal Lobe	Central nervous system	VM Huntsman Cancer Institute	Brain
TCGA-CS-5397-01	TCGA-CS-5397-01	11.5	54	-19866		FEMALE	Astrocytoma			WITH TUMOR	G3			Supratentorial, Temporal Lobe	Central nervous system	CS Thomas Jefferson University	Brain
TCGA-QH-A6CS-01	TCGA-QH-A6CS-01	11.58	41	-15092		MALE	Astrocytoma			WITH TUMOR	G3			Supratentorial, Frontal Lobe	Central nervous system	QH Fondazione-Besta	Brain
TCGA-HT-A5RC-01	TCGA-HT-A5RC-01	11.64	70	-25772	140	FEMALE	Astrocytoma			WITH TUMOR	G3			Supratentorial, Frontal Lobe	Central nervous system	HT Case Western - St Joes
TCGA-CS-6188-01	TCGA-CS-6188-01	11.77	48	-17729		MALE	Astrocytoma	0.8	1.2	WITH TUMOR	G3		0.4	Supratentorial, Temporal Lobe	Central nervous system	CS Thomas Jefferson University	Brain
TCGA-HT-A74H-01	TCGA-HT-A74H-01	11.85	62	-22850		MALE	Astrocytoma				G3			Supratentorial, Temporal Lobe	Central nervous system	HT Case Western - St Joes	Brain
TCGA-E1-A7YL-01	TCGA-E1-A7YL-01	11.9	46	-16982		MALE	Astrocytoma			WITH TUMOR	G3			Supratentorial, Frontal Lobe	Central nervous system	E1 Duke
TCGA-DU-A5TY-01	TCGA-DU-A5TY-01	11.93	46	-16945		FEMALE	Astrocytoma			WITH TUMOR	G3			Supratentorial, Parietal Lobe	Central nervous system	DU Henry Ford Hospital	Brain
TCGA-TM-A7C3-01	TCGA-TM-A7C3-01	12.19	43	-16021	1409	FEMALE	Astrocytoma			WITH TUMOR	G3			Supratentorial, Temporal Lobe	Central nervous system	TM The University of New South Wales	Brain

## Sheet: OligoAstrocytoma_low
sample	samples	C20orf30	age_at_initial_pathologic_diagnosis	days_to_birth	days_to_collection	gender	histological_type	intermediate_dimension	longest_dimension	person_neoplasm_cancer_status	neoplasm_histologic_grade	new_neoplasm_event_type	shortest_dimension	tumor_location	tumor_tissue_site	tissue_source_site	_primary_site
TCGA-DU-8166-01	TCGA-DU-8166-01	9.536	29	-10641		FEMALE	Oligoastrocytoma	0.9	0.9	WITH TUMOR	G2		0.5	Supratentorial, Frontal Lobe	Central nervous system	DU Henry Ford Hospital	Brain
TCGA-DU-A6S6-01	TCGA-DU-A6S6-01	9.811	35	-12809		FEMALE	Oligoastrocytoma			TUMOR FREE	G2			Supratentorial, Frontal Lobe	Central nervous system	DU Henry Ford Hospital	Brain
TCGA-TQ-A7RO-01	TCGA-TQ-A7RO-01	9.841	29	-10890	665	MALE	Oligoastrocytoma			WITH TUMOR	G2			Supratentorial, Temporal Lobe	Central nervous system	TQ University of Sao Paulo	Brain
TCGA-TQ-A7RG-01	TCGA-TQ-A7RG-01	10.05	36	-13227	287	MALE	Oligoastrocytoma			WITH TUMOR	G2			Supratentorial, Temporal Lobe	Central nervous system	TQ University of Sao Paulo	Brain
TCGA-P5-A737-01	TCGA-P5-A737-01	10.13	47	-17390		MALE	Oligoastrocytoma			TUMOR FREE	G2			Supratentorial, Frontal Lobe	Central nervous system	P5 Cureline	Brain
TCGA-HT-A74J-01	TCGA-HT-A74J-01	10.15	33	-12393		MALE	Oligoastrocytoma				G2			Supratentorial, Temporal Lobe	Central nervous system	HT Case Western - St Joes
TCGA-FG-7637-01	TCGA-FG-7637-01	10.19	49	-18084		MALE	Oligoastrocytoma	0.6	1	WITH TUMOR	G2		0.5	Supratentorial, Temporal Lobe	Central nervous system	FG Case Western	Brain
TCGA-HT-A74L-01	TCGA-HT-A74L-01	10.21	22	-8240	103	FEMALE	Oligoastrocytoma			WITH TUMOR	G2			Supratentorial, Parietal Lobe	Central nervous system	HT Case Western - St Joes
TCGA-HT-7483-01	TCGA-HT-7483-01	10.24	14	-5267		MALE	Oligoastrocytoma	1	1.3	TUMOR FREE	G2		0.5	Supratentorial, Frontal Lobe	Central nervous system	HT Case Western - St Joes
TCGA-TQ-A7RH-01	TCGA-TQ-A7RH-01	10.24	39	-14524	167	MALE	Oligoastrocytoma			WITH TUMOR	G2			Supratentorial, Temporal Lobe	Central nervous system	TQ University of Sao Paulo	Brain
TCGA-FG-5965-01	TCGA-FG-5965-01	10.26	39	-14249		FEMALE	Oligoastrocytoma	1	1.1	WITH TUMOR	G2		0.8	Supratentorial, Frontal Lobe	Central nervous system	FG Case Western	Brain
TCGA-TM-A7C5-01	TCGA-TM-A7C5-01	10.27	30	-11286	1194	MALE	Oligoastrocytoma			TUMOR FREE	G2			Supratentorial, Parietal Lobe	Central nervous system	TM The University of New South Wales	Brain
TCGA-DB-A4XC-01	TCGA-DB-A4XC-01	10.3	26	-9705		MALE	Oligoastrocytoma			TUMOR FREE	G2			Supratentorial, Temporal Lobe	Central nervous system	DB Mayo Clinic - Rochester
TCGA-TQ-A7RJ-01	TCGA-TQ-A7RJ-01	10.33	25	-9209	924	FEMALE	Oligoastrocytoma			WITH TUMOR	G2			Supratentorial, Parietal Lobe	Central nervous system	TQ University of Sao Paulo	Brain
TCGA-S9-A7IQ-01	TCGA-S9-A7IQ-01	10.33	45	-16512		FEMALE	Oligoastrocytoma			WITH TUMOR	G2			Supratentorial, Frontal Lobe	Central nervous system	S9 Dept of Neurosurgery at University of Heidelberg
TCGA-HT-7610-01	TCGA-HT-7610-01	10.35	25	-9447		FEMALE	Oligoastrocytoma			TUMOR FREE	G2			Supratentorial, Temporal Lobe	Central nervous system	HT Case Western - St Joes
TCGA-DB-A64Q-01	TCGA-DB-A64Q-01	10.35	31	-11637		FEMALE	Oligoastrocytoma			TUMOR FREE	G2			Supratentorial, Frontal Lobe	Central nervous system	DB Mayo Clinic - Rochester
TCGA-E1-A7YW-01	TCGA-E1-A7YW-01	10.37	28	-10571	4072	MALE	Oligoastrocytoma			WITH TUMOR	G2			Supratentorial, Parietal Lobe	Central nervous system	E1 Duke
TCGA-S9-A6WH-01	TCGA-S9-A6WH-01	10.37	73	-26904	697	FEMALE	Oligoastrocytoma			WITH TUMOR	G2			Supratentorial, Temporal Lobe	Central nervous system	S9 Dept of Neurosurgery at University of Heidelberg
TCGA-TM-A84T-01	TCGA-TM-A84T-01	10.38	19	-6994		MALE	Oligoastrocytoma			WITH TUMOR	G2			Supratentorial, Frontal Lobe	Central nervous system	TM The University of New South Wales	Brain
TCGA-FG-A60K-01	TCGA-FG-A60K-01	10.42	34	-12445		FEMALE	Oligoastrocytoma			WITH TUMOR	G2			Supratentorial, Frontal Lobe	Central nervous system	FG Case Western	Brain
TCGA-QH-A6CZ-01	TCGA-QH-A6CZ-01	10.43	38	-14007	16	MALE	Oligoastrocytoma			TUMOR FREE	G2			Supratentorial, Frontal Lobe	Central nervous system	QH Fondazione-Besta	Brain
TCGA-RY-A845-01	TCGA-RY-A845-01	10.43	40	-14617		FEMALE	Oligoastrocytoma			TUMOR FREE	G2			Supratentorial, Parietal Lobe	Central nervous system	RY University of California San Francisco	Brain
TCGA-FG-8188-01	TCGA-FG-8188-01	10.44	41	-15051		MALE	Oligoastrocytoma	0.6	1.1	WITH TUMOR	G2		0.6	Supratentorial, Temporal Lobe	Central nervous system	FG Case Western	Brain
TCGA-HW-7489-01	TCGA-HW-7489-01	10.45	38	-14201		MALE	Oligoastrocytoma	0.8	1.2	WITH TUMOR	G2		0.3	Supratentorial, Frontal Lobe	Central nervous system	HW MSKCC	Brain
TCGA-HT-8018-01	TCGA-HT-8018-01	10.45	40	-14910		FEMALE	Oligoastrocytoma	0.9	1.3	TUMOR FREE	G2		0.9	Supratentorial, Temporal Lobe	Central nervous system	HT Case Western - St Joes
TCGA-TM-A84L-01	TCGA-TM-A84L-01	10.45	31	-11498		MALE	Oligoastrocytoma			WITH TUMOR	G2			Supratentorial, Temporal Lobe	Central nervous system	TM The University of New South Wales	Brain
TCGA-DB-A4X9-01	TCGA-DB-A4X9-01	10.46	33	-12131	832	FEMALE	Oligoastrocytoma			TUMOR FREE	G2			Supratentorial, Temporal Lobe	Central nervous system	DB Mayo Clinic - Rochester
TCGA-HT-7611-01	TCGA-HT-7611-01	10.49	36	-13314		MALE	Oligoastrocytoma			TUMOR FREE	G2			Supratentorial, Frontal Lobe	Central nervous system	HT Case Western - St Joes
TCGA-P5-A77X-01	TCGA-P5-A77X-01	10.51	55	-20128		FEMALE	Oligoastrocytoma			TUMOR FREE	G2			Supratentorial, Frontal Lobe	Central nervous system	P5 Cureline	Brain
TCGA-FG-A713-01	TCGA-FG-A713-01	10.51	74	-27232	82	FEMALE	Oligoastrocytoma			TUMOR FREE	G2			Supratentorial, Frontal Lobe	Central nervous system	FG Case Western	Brain
TCGA-DB-A64U-01	TCGA-DB-A64U-01	10.52	38	-14019		FEMALE	Oligoastrocytoma			TUMOR FREE	G2			Supratentorial, Frontal Lobe	Central nervous system	DB Mayo Clinic - Rochester
TCGA-DB-5280-01	TCGA-DB-5280-01	10.52	43	-15836		MALE	Oligoastrocytoma			TUMOR FREE	G2			Supratentorial, Frontal Lobe	Central nervous system	DB Mayo Clinic - Rochester
TCGA-DU-7306-01	TCGA-DU-7306-01	10.55	67	-24800		MALE	Oligoastrocytoma	1.1	1.1	WITH TUMOR	G2		0.7	Supratentorial, Temporal Lobe	Central nervous system	DU Henry Ford Hospital	Brain
TCGA-QH-A6X3-01	TCGA-QH-A6X3-01	10.56	27	-10184		MALE	Oligoastrocytoma			TUMOR FREE	G2			Supratentorial, Parietal Lobe	Central nervous system	QH Fondazione-Besta	Brain
TCGA-DU-7304-02	TCGA-DU-7304-02	9.56	43	-15931	2066	MALE	Oligoastrocytoma			WITH TUMOR	G3			Supratentorial, Frontal Lobe	Central nervous system	DU Henry Ford Hospital	Brain
TCGA-QH-A6CW-01	TCGA-QH-A6CW-01	9.936	43	-15847	24	MALE	Oligoastrocytoma			TUMOR FREE	G3			Supratentorial, Temporal Lobe	Central nervous system	QH Fondazione-Besta	Brain
TCGA-DB-A75K-01	TCGA-DB-A75K-01	9.958	55	-20241		FEMALE	Oligoastrocytoma			TUMOR FREE	G3			Supratentorial, Frontal Lobe	Central nervous system	DB Mayo Clinic - Rochester
TCGA-DU-A7T8-01	TCGA-DU-A7T8-01	10.14	35	-13108	3705	MALE	Oligoastrocytoma			WITH TUMOR	G3			Supratentorial, Frontal Lobe	Central nervous system	DU Henry Ford Hospital	Brain
TCGA-QH-A65X-01	TCGA-QH-A65X-01	10.18	28	-10440	39	FEMALE	Oligoastrocytoma			TUMOR FREE	G3			Supratentorial, Frontal Lobe	Central nervous system	QH Fondazione-Besta	Brain
TCGA-FN-7833-01	TCGA-FN-7833-01	10.23	25	-9228		MALE	Oligoastrocytoma	0.3	0.5	TUMOR FREE	G3		0.2	Supratentorial, Frontal Lobe	Central nervous system	FN International Genomics Consortium	Brain
TCGA-QH-A6X4-01	TCGA-QH-A6X4-01	10.24	47	-17258	129	MALE	Oligoastrocytoma			TUMOR FREE	G3			Supratentorial, Temporal Lobe	Central nervous system	QH Fondazione-Besta	Brain
TCGA-TM-A84H-01	TCGA-TM-A84H-01	10.28	44	-16277	627	FEMALE	Oligoastrocytoma			TUMOR FREE	G3			Supratentorial, Frontal Lobe	Central nervous system	TM The University of New South Wales	Brain
TCGA-FG-8186-01	TCGA-FG-8186-01	10.29	42	-15431		FEMALE	Oligoastrocytoma	1	1.5	WITH TUMOR	G3		0.9	Supratentorial, Frontal Lobe	Central nervous system	FG Case Western	Brain
TCGA-HT-7609-01	TCGA-HT-7609-01	10.29	34	-12607		MALE	Oligoastrocytoma			TUMOR FREE	G3			Supratentorial, Frontal Lobe	Central nervous system	HT Case Western - St Joes
TCGA-KT-A74X-01	TCGA-KT-A74X-01	10.31	26	-9590		MALE	Oligoastrocytoma			WITH TUMOR	G3			Supratentorial, Parietal Lobe	Central nervous system	KT Hartford	Brain
TCGA-HT-7879-01	TCGA-HT-7879-01	10.31	31	-11622		MALE	Oligoastrocytoma			TUMOR FREE	G3			Supratentorial, Temporal Lobe	Central nervous system	HT Case Western - St Joes
TCGA-IK-8125-01	TCGA-IK-8125-01	10.33	62	-22745		MALE	Oligoastrocytoma	0.8	0.9	TUMOR FREE	G3		0.6	Supratentorial, Frontal Lobe	Central nervous system	IK Christiana Healthcare	Brain
TCGA-S9-A7IY-01	TCGA-S9-A7IY-01	10.34	39	-14422	398	MALE	Oligoastrocytoma			WITH TUMOR	G3			Supratentorial, Frontal Lobe	Central nervous system	S9 Dept of Neurosurgery at University of Heidelberg
TCGA-FG-8181-01	TCGA-FG-8181-01	10.36	23	-8642		MALE	Oligoastrocytoma	1.7	1.9	WITH TUMOR	G3		0.7	Supratentorial, Frontal Lobe	Central nervous system	FG Case Western	Brain
TCGA-P5-A730-01	TCGA-P5-A730-01	10.36	22	-8043	161	MALE	Oligoastrocytoma			TUMOR FREE	G3			Supratentorial, Occipital Lobe	Central nervous system	P5 Cureline	Brain
TCGA-DB-A4XE-01	TCGA-DB-A4XE-01	10.37	27	-10150		FEMALE	Oligoastrocytoma			TUMOR FREE	G3			Supratentorial, Temporal Lobe	Central nervous system	DB Mayo Clinic - Rochester	Brain
TCGA-HT-8114-01	TCGA-HT-8114-01	10.39	36	-13198		MALE	Oligoastrocytoma	0.8	2	TUMOR FREE	G3		0.6	Supratentorial, Parietal Lobe	Central nervous system	HT Case Western - St Joes
TCGA-DU-5851-01	TCGA-DU-5851-01	10.44	40	-14802		FEMALE	Oligoastrocytoma	1	1	WITH TUMOR	G3		1	Supratentorial, Temporal Lobe	Central nervous system	DU Henry Ford Hospital	Brain
TCGA-E1-A7YU-01	TCGA-E1-A7YU-01	10.48	42	-15345		MALE	Oligoastrocytoma			WITH TUMOR	G3			Supratentorial, Frontal Lobe	Central nervous system	E1 Duke
TCGA-HT-7475-01	TCGA-HT-7475-01	10.48	67	-24686		MALE	Oligoastrocytoma			TUMOR FREE	G3			Supratentorial, Frontal Lobe	Central nervous system	HT Case Western - St Joes
TCGA-DH-5143-01	TCGA-DH-5143-01	10.51	30	-11291		MALE	Oligoastrocytoma			WITH TUMOR	G3			Supratentorial, Temporal Lobe	Central nervous system	DH University of Florida	Brain
TCGA-DU-7304-01	TCGA-DU-7304-01	10.53	43	-15931		MALE	Oligoastrocytoma	0.8	1	WITH TUMOR	G3		0.6	Supratentorial, Frontal Lobe	Central nervous system	DU Henry Ford Hospital	Brain
TCGA-DB-5281-01	TCGA-DB-5281-01	10.53	61	-22342		MALE	Oligoastrocytoma	1	2	WITH TUMOR	G3		0.5	Supratentorial, Frontal Lobe	Central nervous system	DB Mayo Clinic - Rochester
TCGA-E1-A7YV-01	TCGA-E1-A7YV-01	10.53	26	-9546	1314	FEMALE	Oligoastrocytoma			WITH TUMOR	G3			Supratentorial, Frontal Lobe	Central nervous system	E1 Duke
TCGA-S9-A6WP-01	TCGA-S9-A6WP-01	10.53	42	-15658	111	MALE	Oligoastrocytoma			WITH TUMOR	G3			Supratentorial, Frontal Lobe	Central nervous system	S9 Dept of Neurosurgery at University of Heidelberg
TCGA-DU-8163-01	TCGA-DU-8163-01	10.54	29	-10824		MALE	Oligoastrocytoma	1	1	WITH TUMOR	G3		0.6	Supratentorial, Temporal Lobe	Central nervous system	DU Henry Ford Hospital	Brain
TCGA-QH-A6CY-01	TCGA-QH-A6CY-01	10.55	38	-14140	18	MALE	Oligoastrocytoma			WITH TUMOR	G3			Supratentorial, Frontal Lobe	Central nervous system	QH Fondazione-Besta	Brain
TCGA-DB-5275-01	TCGA-DB-5275-01	10.56	36	-13371		MALE	Oligoastrocytoma			TUMOR FREE	G3			Supratentorial, Temporal Lobe	Central nervous system	DB Mayo Clinic - Rochester
TCGA-DU-6403-01	TCGA-DU-6403-01	10.59	60	-22031		FEMALE	Oligoastrocytoma			WITH TUMOR	G3			Supratentorial, Temporal Lobe	Central nervous system	DU Henry Ford Hospital	Brain

## Sheet: OligoAstrocytoma_high
sample	samples	C20orf30	age_at_initial_pathologic_diagnosis	days_to_birth	days_to_collection	gender	histological_type	intermediate_dimension	longest_dimension	person_neoplasm_cancer_status	neoplasm_histologic_grade	new_neoplasm_event_type	shortest_dimension	tumor_location	tumor_tissue_site	tissue_source_site	_primary_site
TCGA-DU-7019-01	TCGA-DU-7019-01	10.6	39	-14279		MALE	Oligoastrocytoma			TUMOR FREE	[Discrepancy]			Supratentorial, Temporal Lobe	Central nervous system	DU Henry Ford Hospital	Brain
TCGA-DB-A4XH-01	TCGA-DB-A4XH-01	10.6	53	-19710		FEMALE	Oligoastrocytoma			TUMOR FREE	G2			Supratentorial, Frontal Lobe	Central nervous system	DB Mayo Clinic - Rochester
TCGA-HT-7873-01	TCGA-HT-7873-01	10.6	29	-10805		MALE	Oligoastrocytoma	0.6	1	WITH TUMOR	G2		0.3	Supratentorial, Frontal Lobe	Central nervous system	HT Case Western - St Joes
TCGA-QH-A6XA-01	TCGA-QH-A6XA-01	10.6	23	-8508		FEMALE	Oligoastrocytoma			TUMOR FREE	G2			Supratentorial, Frontal Lobe	Central nervous system	QH Fondazione-Besta	Brain
TCGA-S9-A7QY-01	TCGA-S9-A7QY-01	10.61	35	-12853	560	FEMALE	Oligoastrocytoma			WITH TUMOR	G2			Supratentorial, Frontal Lobe	Central nervous system	S9 Dept of Neurosurgery at University of Heidelberg
TCGA-DU-5872-01	TCGA-DU-5872-01	10.61	43	-15986		FEMALE	Oligoastrocytoma			WITH TUMOR	G2			Supratentorial, Frontal Lobe	Central nervous system	DU Henry Ford Hospital	Brain
TCGA-TQ-A7RK-02	TCGA-TQ-A7RK-02	10.63	29	-10742	1131	MALE	Oligoastrocytoma			TUMOR FREE	G2			Supratentorial, Frontal Lobe	Central nervous system	TQ University of Sao Paulo	Brain
TCGA-DB-A64S-01	TCGA-DB-A64S-01	10.64	20	-7389	352	MALE	Oligoastrocytoma			TUMOR FREE	G2			Supratentorial, Frontal Lobe	Central nervous system	DB Mayo Clinic - Rochester	Brain
TCGA-TQ-A7RK-01	TCGA-TQ-A7RK-01	10.64	29	-10742	1057	MALE	Oligoastrocytoma			TUMOR FREE	G2			Supratentorial, Frontal Lobe	Central nervous system	TQ University of Sao Paulo	Brain
TCGA-HT-7608-01	TCGA-HT-7608-01	10.66	61	-22302		MALE	Oligoastrocytoma	0.9	2.2	TUMOR FREE	G2		0.5	Supratentorial, Temporal Lobe	Central nervous system	HT Case Western - St Joes
TCGA-DU-7011-01	TCGA-DU-7011-01	10.67	25	-9322		MALE	Oligoastrocytoma			WITH TUMOR	G2			Supratentorial, Frontal Lobe	Central nervous system	DU Henry Ford Hospital	Brain
TCGA-DU-6395-01	TCGA-DU-6395-01	10.68	31	-11584		MALE	Oligoastrocytoma			WITH TUMOR	G2			Supratentorial, Frontal Lobe	Central nervous system	DU Henry Ford Hospital	Brain
TCGA-HT-8013-01	TCGA-HT-8013-01	10.69	37	-13753		FEMALE	Oligoastrocytoma	0.8	0.8	WITH TUMOR	G2		0.8	Supratentorial, Frontal Lobe	Central nervous system	HT Case Western - St Joes
TCGA-FG-7643-01	TCGA-FG-7643-01	10.7	49	-18206		FEMALE	Oligoastrocytoma	0.8	1.3	WITH TUMOR	G2		0.6	Supratentorial, Frontal Lobe	Central nervous system	FG Case Western	Brain
TCGA-DU-5853-01	TCGA-DU-5853-01	10.71	29	-10624		MALE	Oligoastrocytoma	0.9	0.9	WITH TUMOR	G2		0.8	Supratentorial, Frontal Lobe	Central nervous system	DU Henry Ford Hospital	Brain
TCGA-FG-A4MY-01	TCGA-FG-A4MY-01	10.72	44	-16310		FEMALE	Oligoastrocytoma			WITH TUMOR	G2			Supratentorial, Parietal Lobe	Central nervous system	FG Case Western	Brain
TCGA-HT-7880-01	TCGA-HT-7880-01	10.74	30	-11043		MALE	Oligoastrocytoma			TUMOR FREE	G2			Supratentorial, Parietal Lobe	Central nervous system	HT Case Western - St Joes
TCGA-DB-A4XA-01	TCGA-DB-A4XA-01	10.75	30	-11195	224	MALE	Oligoastrocytoma			WITH TUMOR	G2			Supratentorial, Parietal Lobe	Central nervous system	DB Mayo Clinic - Rochester
TCGA-S9-A6WI-01	TCGA-S9-A6WI-01	10.75	56	-20609		FEMALE	Oligoastrocytoma			WITH TUMOR	G2			Supratentorial, Frontal Lobe	Central nervous system	S9 Dept of Neurosurgery at University of Heidelberg
TCGA-QH-A6X5-01	TCGA-QH-A6X5-01	10.75	58	-21239		FEMALE	Oligoastrocytoma				G2			Supratentorial, Frontal Lobe	Central nervous system	QH Fondazione-Besta	Brain
TCGA-FG-8187-01	TCGA-FG-8187-01	10.76	31	-11684		MALE	Oligoastrocytoma	1.2	1.4	TUMOR FREE	G2		0.7	Supratentorial, Frontal Lobe	Central nervous system	FG Case Western	Brain
TCGA-FG-A60J-01	TCGA-FG-A60J-01	10.76	47	-17339		FEMALE	Oligoastrocytoma			TUMOR FREE	G2			Supratentorial, Frontal Lobe	Central nervous system	FG Case Western	Brain
TCGA-WY-A85D-01	TCGA-WY-A85D-01	10.76	60	-21979	1035	MALE	Oligoastrocytoma			WITH TUMOR	G2			Supratentorial, Frontal Lobe	Central nervous system	WY Johns Hopkins	Brain
TCGA-HT-7681-01	TCGA-HT-7681-01	10.8	29	-10790		FEMALE	Oligoastrocytoma	0.9	2.8	TUMOR FREE	G2		0.6	Supratentorial, Frontal Lobe	Central nervous system	HT Case Western - St Joes	Brain
TCGA-P5-A731-01	TCGA-P5-A731-01	10.81	59	-21715	143	FEMALE	Oligoastrocytoma			TUMOR FREE	G2			Supratentorial, Frontal Lobe	Central nervous system	P5 Cureline	Brain
TCGA-DU-5871-01	TCGA-DU-5871-01	10.84	37	-13673		FEMALE	Oligoastrocytoma			TUMOR FREE	G2			Supratentorial, Frontal Lobe	Central nervous system	DU Henry Ford Hospital	Brain
TCGA-E1-5322-01	TCGA-E1-5322-01	10.85	38	-13903		FEMALE	Oligoastrocytoma				G2			Supratentorial, Temporal Lobe	Central nervous system	E1 Duke
TCGA-HT-7902-01	TCGA-HT-7902-01	10.86	30	-11118		FEMALE	Oligoastrocytoma	0.8	1.5	TUMOR FREE	G2		0.8	Supratentorial, Frontal Lobe	Central nervous system	HT Case Western - St Joes
TCGA-TQ-A7RR-01	TCGA-TQ-A7RR-01	10.86	38	-14022	454	MALE	Oligoastrocytoma			TUMOR FREE	G2			Supratentorial, Parietal Lobe	Central nervous system	TQ University of Sao Paulo	Brain
TCGA-HT-7473-01	TCGA-HT-7473-01	10.89	28	-10306		MALE	Oligoastrocytoma	1.2	1.5	TUMOR FREE	G2		0.5	Supratentorial, Temporal Lobe	Central nervous system	HT Case Western - St Joes
TCGA-FG-5965-02	TCGA-FG-5965-02	10.89	39	-14249	1437	FEMALE	Oligoastrocytoma			WITH TUMOR	G2			Supratentorial, Frontal Lobe	Central nervous system	FG Case Western	Brain
TCGA-HT-A614-01	TCGA-HT-A614-01	10.9	47	-17392	78	MALE	Oligoastrocytoma			WITH TUMOR	G2			Supratentorial, Not Otherwise Specified	Central nervous system	HT Case Western - St Joes
TCGA-WY-A85E-01	TCGA-WY-A85E-01	10.91	48	-17878	794	FEMALE	Oligoastrocytoma			WITH TUMOR	G2			Supratentorial, Frontal Lobe	Central nervous system	WY Johns Hopkins	Brain
TCGA-HT-7482-01	TCGA-HT-7482-01	10.94	18	-6857		FEMALE	Oligoastrocytoma			TUMOR FREE	G2			Supratentorial, Frontal Lobe	Central nervous system	HT Case Western - St Joes
TCGA-HT-7692-01	TCGA-HT-7692-01	10.96	43	-15727		MALE	Oligoastrocytoma			TUMOR FREE	G2			Supratentorial, Frontal Lobe	Central nervous system	HT Case Western - St Joes
TCGA-S9-A6WQ-01	TCGA-S9-A6WQ-01	10.96	57	-21133		FEMALE	Oligoastrocytoma			WITH TUMOR	G2			Supratentorial, Frontal Lobe	Central nervous system	S9 Dept of Neurosurgery at University of Heidelberg
TCGA-HT-7474-01	TCGA-HT-7474-01	11.03	52	-19149		MALE	Oligoastrocytoma			TUMOR FREE	G2			Supratentorial, Frontal Lobe	Central nervous system	HT Case Western - St Joes
TCGA-TQ-A7RP-01	TCGA-TQ-A7RP-01	11.06	66	-24109	553	MALE	Oligoastrocytoma			WITH TUMOR	G2			Supratentorial, Temporal Lobe	Central nervous system	TQ University of Sao Paulo	Brain
TCGA-DU-8167-01	TCGA-DU-8167-01	11.09	69	-25262		FEMALE	Oligoastrocytoma	1.2	1.2	TUMOR FREE	G2		0.4	Supratentorial, Frontal Lobe	Central nervous system	DU Henry Ford Hospital	Brain
TCGA-DU-A5TR-01	TCGA-DU-A5TR-01	11.1	51	-18791		MALE	Oligoastrocytoma			TUMOR FREE	G2			Supratentorial, Temporal Lobe	Central nervous system	DU Henry Ford Hospital	Brain
TCGA-DU-5872-02	TCGA-DU-5872-02	11.18	43	-15986	1317	FEMALE	Oligoastrocytoma			WITH TUMOR	G2			Supratentorial, Frontal Lobe	Central nervous system	DU Henry Ford Hospital	Brain
TCGA-QH-A65S-01	TCGA-QH-A65S-01	11.2	32	-11861	56	FEMALE	Oligoastrocytoma			WITH TUMOR	G2			Supratentorial, Frontal Lobe	Central nervous system	QH Fondazione-Besta	Brain
TCGA-DB-A64O-01	TCGA-DB-A64O-01	11.49	59	-21811	533	MALE	Oligoastrocytoma			WITH TUMOR	G2			Supratentorial, Temporal Lobe	Central nervous system	DB Mayo Clinic - Rochester
TCGA-DB-A64W-01	TCGA-DB-A64W-01	10.65	65	-23936		FEMALE	Oligoastrocytoma			TUMOR FREE	G3			Supratentorial, Frontal Lobe	Central nervous system	DB Mayo Clinic - Rochester
TCGA-TQ-A7RM-01	TCGA-TQ-A7RM-01	10.66	41	-15154		FEMALE	Oligoastrocytoma			WITH TUMOR	G3			Supratentorial, Temporal Lobe	Central nervous system	TQ University of Sao Paulo	Brain
TCGA-DU-6542-01	TCGA-DU-6542-01	10.67	25	-9380		MALE	Oligoastrocytoma			WITH TUMOR	G3			Supratentorial, Temporal Lobe	Central nervous system	DU Henry Ford Hospital	Brain
TCGA-DU-6396-01	TCGA-DU-6396-01	10.68	31	-11427		FEMALE	Oligoastrocytoma	1	1	WITH TUMOR	G3		1	Supratentorial, Frontal Lobe	Central nervous system	DU Henry Ford Hospital	Brain
TCGA-QH-A870-01	TCGA-QH-A870-01	10.71	38	-14082	1	FEMALE	Oligoastrocytoma			WITH TUMOR	G3			Supratentorial, Occipital Lobe	Central nervous system	QH Fondazione-Besta	Brain
TCGA-DB-5274-01	TCGA-DB-5274-01	10.72	37	-13680		FEMALE	Oligoastrocytoma			TUMOR FREE	G3			Supratentorial, Frontal Lobe	Central nervous system	DB Mayo Clinic - Rochester
TCGA-VV-A829-01	TCGA-VV-A829-01	10.74	44	-16163	720	MALE	Oligoastrocytoma			TUMOR FREE	G3			Supratentorial, Frontal Lobe	Central nervous system	VV John Wayne Cancer Center	Brain
TCGA-DB-5270-01	TCGA-DB-5270-01	10.75	38	-13904		FEMALE	Oligoastrocytoma	1	1	TUMOR FREE	G3		0.7	Supratentorial, Frontal Lobe	Central nervous system	DB Mayo Clinic - Rochester
TCGA-DH-5140-01	TCGA-DH-5140-01	10.75	38	-13943		FEMALE	Oligoastrocytoma			WITH TUMOR	G3			Supratentorial, Temporal Lobe	Central nervous system	DH University of Florida	Brain
TCGA-DU-5855-01	TCGA-DU-5855-01	10.76	49	-18234		FEMALE	Oligoastrocytoma	0.7	1.1	WITH TUMOR	G3		0.7	Supratentorial, Frontal Lobe	Central nervous system	DU Henry Ford Hospital	Brain
TCGA-HT-7684-01	TCGA-HT-7684-01	10.76	58	-21352		MALE	Oligoastrocytoma	0.9	1.7	TUMOR FREE	G3		0.9	Supratentorial, Frontal Lobe	Central nervous system	HT Case Western - St Joes
TCGA-P5-A77W-01	TCGA-P5-A77W-01	10.78	37	-13545	114	FEMALE	Oligoastrocytoma			TUMOR FREE	G3			Supratentorial, Frontal Lobe	Central nervous system	P5 Cureline	Brain
TCGA-DU-8162-01	TCGA-DU-8162-01	10.8	61	-22596		FEMALE	Oligoastrocytoma			WITH TUMOR	G3			Supratentorial, Temporal Lobe	Central nervous system	DU Henry Ford Hospital	Brain
TCGA-FG-A4MW-01	TCGA-FG-A4MW-01	10.84	63	-23077	64	MALE	Oligoastrocytoma			WITH TUMOR	G3			Supratentorial, Frontal Lobe	Central nervous system	FG Case Western	Brain
TCGA-CS-6186-01	TCGA-CS-6186-01	10.9	58	-21321		MALE	Oligoastrocytoma			WITH TUMOR	G3			Supratentorial, Frontal Lobe	Central nervous system	CS Thomas Jefferson University	Brain
TCGA-DB-5276-01	TCGA-DB-5276-01	10.92	32	-11738		MALE	Oligoastrocytoma			TUMOR FREE	G3			Supratentorial, Frontal Lobe	Central nervous system	DB Mayo Clinic - Rochester
TCGA-HT-8111-01	TCGA-HT-8111-01	10.94	32	-11810		MALE	Oligoastrocytoma				G3			Supratentorial, Frontal Lobe	Central nervous system	HT Case Western - St Joes
TCGA-DU-A7TD-01	TCGA-DU-A7TD-01	10.96	52	-19025	616	MALE	Oligoastrocytoma			WITH TUMOR	G3			Supratentorial, Temporal Lobe	Central nervous system	DU Henry Ford Hospital	Brain
TCGA-HT-7690-01	TCGA-HT-7690-01	10.99	29	-10673		MALE	Oligoastrocytoma			TUMOR FREE	G3			Supratentorial, Frontal Lobe	Central nervous system	HT Case Western - St Joes
TCGA-DU-5852-01	TCGA-DU-5852-01	11	61	-22348		FEMALE	Oligoastrocytoma			WITH TUMOR	G3			Supratentorial, Temporal Lobe	Central nervous system	DU Henry Ford Hospital	Brain
TCGA-S9-A6TV-01	TCGA-S9-A6TV-01	11.04	50	-18321		MALE	Oligoastrocytoma			TUMOR FREE	G3			Supratentorial, Frontal Lobe	Central nervous system	S9 Dept of Neurosurgery at University of Heidelberg
TCGA-DU-8161-01	TCGA-DU-8161-01	11.12	63	-23064		FEMALE	Oligoastrocytoma	1	1	WITH TUMOR	G3		0.7	Supratentorial, Not Otherwise Specified	Central nervous system	DU Henry Ford Hospital	Brain
TCGA-FG-A70Z-01	TCGA-FG-A70Z-01	11.23	53	-19717		FEMALE	Oligoastrocytoma			WITH TUMOR	G3			Supratentorial, Temporal Lobe	Central nervous system	FG Case Western	Brain
TCGA-DU-6406-01	TCGA-DU-6406-01	11.46	59	-21634		FEMALE	Oligoastrocytoma	0.5	1		G3		0.5	Supratentorial, Frontal Lobe	Central nervous system	DU Henry Ford Hospital	Brain
TCGA-FG-A4MU-01	TCGA-FG-A4MU-01	11.55	58	-21450	258	MALE	Oligoastrocytoma			WITH TUMOR	G3			Supratentorial, Temporal Lobe	Central nervous system	FG Case Western	Brain
TCGA-QH-A6CV-01	TCGA-QH-A6CV-01	12.21	51	-18955	52	MALE	Oligoastrocytoma			WITH TUMOR	G3			Supratentorial, Frontal Lobe	Central nervous system	QH Fondazione-Besta	Brain

## Sheet: Oligodendrolgioma_low
sample	samples	C20orf30	age_at_initial_pathologic_diagnosis	days_to_birth	days_to_collection	gender	histological_type	intermediate_dimension	longest_dimension	person_neoplasm_cancer_status	neoplasm_histologic_grade	new_neoplasm_event_type	shortest_dimension	tumor_location	tumor_tissue_site	tissue_source_site	_primary_site
TCGA-TQ-A7RQ-01	TCGA-TQ-A7RQ-01	9.807	38	-14187	504	FEMALE	Oligodendroglioma			TUMOR FREE	G2			Supratentorial, Temporal Lobe	Central nervous system	TQ University of Sao Paulo	Brain
TCGA-RY-A83X-01	TCGA-RY-A83X-01	9.942	46	-16911		FEMALE	Oligodendroglioma			TUMOR FREE	G2			Supratentorial, Frontal Lobe	Central nervous system	RY University of California San Francisco	Brain
TCGA-TQ-A7RN-01	TCGA-TQ-A7RN-01	9.981	32	-11823		MALE	Oligodendroglioma			WITH TUMOR	G2			Supratentorial, Temporal Lobe	Central nervous system	TQ University of Sao Paulo	Brain
TCGA-QH-A86X-01	TCGA-QH-A86X-01	9.981	33	-12385	7	MALE	Oligodendroglioma			TUMOR FREE	G2			Supratentorial, Frontal Lobe	Central nervous system	QH Fondazione-Besta	Brain
TCGA-HT-7875-01	TCGA-HT-7875-01	9.983	56	-20613		MALE	Oligodendroglioma	1.1	2.4	TUMOR FREE	G2		0.6	Supratentorial, Frontal Lobe	Central nervous system	HT Case Western - St Joes
TCGA-S9-A7R1-01	TCGA-S9-A7R1-01	9.986	35	-12828		MALE	Oligodendroglioma			WITH TUMOR	G2			Supratentorial, Frontal Lobe	Central nervous system	S9 Dept of Neurosurgery at University of Heidelberg
TCGA-DU-A6S3-01	TCGA-DU-A6S3-01	9.991	60	-22038		MALE	Oligodendroglioma			TUMOR FREE	G2			Supratentorial, Frontal Lobe	Central nervous system	DU Henry Ford Hospital	Brain
TCGA-DU-A6S2-01	TCGA-DU-A6S2-01	10.01	37	-13597	153	FEMALE	Oligodendroglioma			TUMOR FREE	G2			Supratentorial, Frontal Lobe	Central nervous system	DU Henry Ford Hospital	Brain
TCGA-TQ-A7RU-01	TCGA-TQ-A7RU-01	10.01	51	-18990		MALE	Oligodendroglioma			WITH TUMOR	G2			Supratentorial, Temporal Lobe	Central nervous system	TQ University of Sao Paulo	Brain
TCGA-FG-A6J1-01	TCGA-FG-A6J1-01	10.03	44	-16106	91	FEMALE	Oligodendroglioma			WITH TUMOR	G2			Supratentorial, Not Otherwise Specified	Central nervous system	FG Case Western	Brain
TCGA-S9-A7QZ-01	TCGA-S9-A7QZ-01	10.04	41	-15300	368	MALE	Oligodendroglioma			WITH TUMOR	G2			Supratentorial, Frontal Lobe	Central nervous system	S9 Dept of Neurosurgery at University of Heidelberg
TCGA-HT-8012-01	TCGA-HT-8012-01	10.06	30	-11295		FEMALE	Oligodendroglioma			WITH TUMOR	G2			Supratentorial, Temporal Lobe	Central nervous system	HT Case Western - St Joes
TCGA-S9-A6U2-01	TCGA-S9-A6U2-01	10.06	48	-17800	430	FEMALE	Oligodendroglioma			WITH TUMOR	G2			Supratentorial, Frontal Lobe	Central nervous system	S9 Dept of Neurosurgery at University of Heidelberg
TCGA-TQ-A7RS-01	TCGA-TQ-A7RS-01	10.1	25	-9172	398	FEMALE	Oligodendroglioma			TUMOR FREE	G2			Supratentorial, Frontal Lobe	Central nervous system	TQ University of Sao Paulo	Brain
TCGA-TQ-A7RI-01	TCGA-TQ-A7RI-01	10.11	37	-13799		FEMALE	Oligodendroglioma			TUMOR FREE	G2			Supratentorial, Parietal Lobe	Central nervous system	TQ University of Sao Paulo	Brain
TCGA-RY-A83Y-01	TCGA-RY-A83Y-01	10.15	45	-16470	485	MALE	Oligodendroglioma			TUMOR FREE	G2			Supratentorial, Parietal Lobe	Central nervous system	RY University of California San Francisco	Brain
TCGA-VM-A8CE-01	TCGA-VM-A8CE-01	10.16	25	-9363		MALE	Oligodendroglioma			WITH TUMOR	G2			Supratentorial, Frontal Lobe	Central nervous system	VM Huntsman Cancer Institute	Brain
TCGA-DB-5278-01	TCGA-DB-5278-01	10.17	17	-6480		MALE	Oligodendroglioma	1.3	1.8	WITH TUMOR	G2		0.4	Supratentorial, Frontal Lobe	Central nervous system	DB Mayo Clinic - Rochester
TCGA-DU-8164-01	TCGA-DU-8164-01	10.18	51	-18735		MALE	Oligodendroglioma	0.8	0.8	TUMOR FREE	G2		0.6	Supratentorial, Frontal Lobe	Central nervous system	DU Henry Ford Hospital	Brain
TCGA-CS-6668-01	TCGA-CS-6668-01	10.19	57	-20836		FEMALE	Oligodendroglioma	0.6	1	WITH TUMOR	G2		0.5	Supratentorial, Frontal Lobe	Central nervous system	CS Thomas Jefferson University	Brain
TCGA-DB-A64R-01	TCGA-DB-A64R-01	10.2	24	-8947	436	FEMALE	Oligodendroglioma			TUMOR FREE	G2			Supratentorial, Frontal Lobe	Central nervous system	DB Mayo Clinic - Rochester	Brain
TCGA-HW-7491-01	TCGA-HW-7491-01	10.21	35	-12874		MALE	Oligodendroglioma	0.7	1.1	WITH TUMOR	G2		0.5	Supratentorial, Frontal Lobe	Central nervous system	HW MSKCC	Brain
TCGA-W9-A837-01	TCGA-W9-A837-01	10.21	47			MALE	Oligodendroglioma			WITH TUMOR	G2			Supratentorial, Frontal Lobe	Central nervous system	W9 University of Kansas	Brain
TCGA-DU-6401-01	TCGA-DU-6401-01	10.23	31	-11595		FEMALE	Oligodendroglioma	0.8	1.5	WITH TUMOR	G2		0.5	Supratentorial, Frontal Lobe	Central nervous system	DU Henry Ford Hospital	Brain
TCGA-S9-A6WE-01	TCGA-S9-A6WE-01	10.23	34	-12488	3434	MALE	Oligodendroglioma			WITH TUMOR	G2			Supratentorial, Frontal Lobe	Central nervous system	S9 Dept of Neurosurgery at University of Heidelberg
TCGA-DU-5874-01	TCGA-DU-5874-01	10.24	62	-22847		FEMALE	Oligodendroglioma	1	1	TUMOR FREE	G2		0.7	Supratentorial, Frontal Lobe	Central nervous system	DU Henry Ford Hospital	Brain
TCGA-HT-7480-01	TCGA-HT-7480-01	10.24	33	-12291		MALE	Oligodendroglioma	1.2	1.8	WITH TUMOR	G2		0.3	Supratentorial, Frontal Lobe	Central nervous system	HT Case Western - St Joes
TCGA-FG-7641-01	TCGA-FG-7641-01	10.24	31	-11357		MALE	Oligodendroglioma			TUMOR FREE	G2			Supratentorial, Frontal Lobe	Central nervous system	FG Case Western	Brain
TCGA-R8-A73M-01	TCGA-R8-A73M-01	10.24	48	-17610		FEMALE	Oligodendroglioma				G2			Supratentorial, Parietal Lobe	Central nervous system	R8 MD Anderson	Brain
TCGA-P5-A5ET-01	TCGA-P5-A5ET-01	10.27	27	-10027	98	MALE	Oligodendroglioma			TUMOR FREE	G2			Supratentorial, Frontal Lobe	Central nervous system	P5 Cureline	Brain
TCGA-TQ-A7RW-01	TCGA-TQ-A7RW-01	10.27	32	-11804	1022	MALE	Oligodendroglioma			WITH TUMOR	G2			Supratentorial, Temporal Lobe	Central nervous system	TQ University of Sao Paulo	Brain
TCGA-DU-5870-01	TCGA-DU-5870-01	10.28	34	-12764		FEMALE	Oligodendroglioma			WITH TUMOR	G2			Supratentorial, Temporal Lobe	Central nervous system	DU Henry Ford Hospital	Brain
TCGA-QH-A65Z-01	TCGA-QH-A65Z-01	10.32	54	-19921	19	MALE	Oligodendroglioma			TUMOR FREE	G2			Supratentorial, Frontal Lobe	Central nervous system	QH Fondazione-Besta	Brain
TCGA-DH-A7US-01	TCGA-DH-A7US-01	10.33	50	-18429		MALE	Oligodendroglioma			WITH TUMOR	G2			Supratentorial, Temporal Lobe	Central nervous system	DH University of Florida	Brain
TCGA-CS-5390-01	TCGA-CS-5390-01	10.35	47	-17460		FEMALE	Oligodendroglioma			WITH TUMOR	G2			Supratentorial, Parietal Lobe	Central nervous system	CS Thomas Jefferson University	Brain
TCGA-HT-7877-01	TCGA-HT-7877-01	10.36	20	-7581		FEMALE	Oligodendroglioma	0.8	1.2	TUMOR FREE	G2		0.6	Supratentorial, Frontal Lobe	Central nervous system	HT Case Western - St Joes
TCGA-HT-7695-01	TCGA-HT-7695-01	10.36	29	-10827		FEMALE	Oligodendroglioma	0.9	1.8	TUMOR FREE	G2		0.7	Supratentorial, Frontal Lobe	Central nervous system	HT Case Western - St Joes
TCGA-FG-8182-01	TCGA-FG-8182-01	10.37	35	-12972		MALE	Oligodendroglioma			WITH TUMOR	G2			Supratentorial, Frontal Lobe	Central nervous system	FG Case Western	Brain
TCGA-S9-A7J1-01	TCGA-S9-A7J1-01	10.37	43	-15926		MALE	Oligodendroglioma			WITH TUMOR	G2			Supratentorial, Temporal Lobe	Central nervous system	S9 Dept of Neurosurgery at University of Heidelberg
TCGA-DU-5849-01	TCGA-DU-5849-01	10.39	48	-17663		MALE	Oligodendroglioma			TUMOR FREE	G2			Supratentorial, Frontal Lobe	Central nervous system	DU Henry Ford Hospital	Brain
TCGA-FG-A710-01	TCGA-FG-A710-01	10.4	50	-18415	823	FEMALE	Oligodendroglioma			WITH TUMOR	G2			Supratentorial, Frontal Lobe	Central nervous system	FG Case Western	Brain
TCGA-HT-8010-01	TCGA-HT-8010-01	10.4	64	-23680		FEMALE	Oligodendroglioma			TUMOR FREE	G2			Supratentorial, Frontal Lobe	Central nervous system	HT Case Western - St Joes
TCGA-DU-6400-01	TCGA-DU-6400-01	10.41	66	-24122		FEMALE	Oligodendroglioma	0.6	1	WITH TUMOR	G2		0.5	Supratentorial, Temporal Lobe	Central nervous system	DU Henry Ford Hospital	Brain
TCGA-HW-7495-01	TCGA-HW-7495-01	10.41	45	-16460		FEMALE	Oligodendroglioma			WITH TUMOR	G2			Supratentorial, Frontal Lobe	Central nervous system	HW MSKCC	Brain
TCGA-DU-5870-02	TCGA-DU-5870-02	10.42	34	-12764	6469	FEMALE	Oligodendroglioma			WITH TUMOR	G2			Supratentorial, Temporal Lobe	Central nervous system	DU Henry Ford Hospital	Brain
TCGA-F6-A8O3-01	TCGA-F6-A8O3-01	10.43	34	-12578		MALE	Oligodendroglioma			TUMOR FREE	G2			Supratentorial, Frontal Lobe	Central nervous system	F6 Asterand	Brain
TCGA-TQ-A8XE-01	TCGA-TQ-A8XE-01	10.43	42	-15629	1308	FEMALE	Oligodendroglioma			WITH TUMOR	G2			Supratentorial, Temporal Lobe	Central nervous system	TQ University of Sao Paulo	Brain
TCGA-DH-A66F-01	TCGA-DH-A66F-01	10.44	49	-18193	166	MALE	Oligodendroglioma			TUMOR FREE	G2			Supratentorial, Frontal Lobe	Central nervous system	DH University of Florida	Brain
TCGA-HT-8107-01	TCGA-HT-8107-01	10.45	62	-22880		MALE	Oligodendroglioma	0.6	1	TUMOR FREE	G2		0.4	Supratentorial, Parietal Lobe	Central nervous system	HT Case Western - St Joes
TCGA-HT-7693-01	TCGA-HT-7693-01	10.45	51	-18956		FEMALE	Oligodendroglioma	1	1.1	TUMOR FREE	G2		0.7	Supratentorial, Frontal Lobe	Central nervous system	HT Case Western - St Joes
TCGA-FG-A6IZ-01	TCGA-FG-A6IZ-01	10.45	60	-22275	157	MALE	Oligodendroglioma			TUMOR FREE	G2			Supratentorial, Not Otherwise Specified	Central nervous system	FG Case Western	Brain
TCGA-DU-7009-01	TCGA-DU-7009-01	10.46	32	-11854		FEMALE	Oligodendroglioma	1	1	WITH TUMOR	G2		0.5	Supratentorial, Frontal Lobe	Central nervous system	DU Henry Ford Hospital	Brain
TCGA-E1-5318-01	TCGA-E1-5318-01	10.48	42	-15372		FEMALE	Oligodendroglioma	0.5	0.7	WITH TUMOR	G2		0.2	Supratentorial, Frontal Lobe	Central nervous system	E1 Duke
TCGA-HT-8108-01	TCGA-HT-8108-01	10.48	26	-9539		FEMALE	Oligodendroglioma	0.6	0.7	TUMOR FREE	G2		0.3	Supratentorial, Parietal Lobe	Central nervous system	HT Case Western - St Joes
TCGA-HW-7487-01	TCGA-HW-7487-01	10.48	39	-14535		MALE	Oligodendroglioma	0.9	0.9	WITH TUMOR	G2		0.2	Supratentorial, Frontal Lobe	Central nervous system	HW MSKCC	Brain
TCGA-HT-7605-01	TCGA-HT-7605-01	10.49	38	-13892		MALE	Oligodendroglioma				G2			Supratentorial, Frontal Lobe	Central nervous system	HT Case Western - St Joes
TCGA-R8-A6MK-01	TCGA-R8-A6MK-01	10.49	40	-14716	2841	MALE	Oligodendroglioma				G2			Supratentorial, Frontal Lobe	Central nervous system	R8 MD Anderson	Brain
TCGA-S9-A6TY-01	TCGA-S9-A6TY-01	10.49	50	-18564		MALE	Oligodendroglioma			WITH TUMOR	G2			Supratentorial, Temporal Lobe	Central nervous system	S9 Dept of Neurosurgery at University of Heidelberg	Brain
TCGA-S9-A6UB-01	TCGA-S9-A6UB-01	10.49	52	-19223	3073	MALE	Oligodendroglioma			TUMOR FREE	G2			Supratentorial, Frontal Lobe	Central nervous system	S9 Dept of Neurosurgery at University of Heidelberg
TCGA-S9-A7J2-01	TCGA-S9-A7J2-01	9.552	25	-9345	194	MALE	Oligodendroglioma			WITH TUMOR	G3			Supratentorial, Frontal Lobe	Central nervous system	S9 Dept of Neurosurgery at University of Heidelberg
TCGA-E1-A7YO-01	TCGA-E1-A7YO-01	9.889	45	-16770	6582	MALE	Oligodendroglioma			WITH TUMOR	G3			Supratentorial, Frontal Lobe	Central nervous system	E1 Duke	Brain
TCGA-S9-A6TX-01	TCGA-S9-A6TX-01	9.949	46	-17025	776	MALE	Oligodendroglioma			WITH TUMOR	G3			Supratentorial, Temporal Lobe	Central nervous system	S9 Dept of Neurosurgery at University of Heidelberg
TCGA-S9-A7J3-01	TCGA-S9-A7J3-01	10.07	52	-19056	182	FEMALE	Oligodendroglioma			WITH TUMOR	G3			Supratentorial, Parietal Lobe	Central nervous system	S9 Dept of Neurosurgery at University of Heidelberg
TCGA-HT-7677-01	TCGA-HT-7677-01	10.1	53	-19610		MALE	Oligodendroglioma	1.1	2.1	WITH TUMOR	G3		0.7	Supratentorial, Frontal Lobe	Central nervous system	HT Case Western - St Joes
TCGA-HT-7468-01	TCGA-HT-7468-01	10.11	30	-11209		MALE	Oligodendroglioma			TUMOR FREE	G3			Supratentorial, Parietal Lobe	Central nervous system	HT Case Western - St Joes
TCGA-R8-A6ML-01	TCGA-R8-A6ML-01	10.12	52	-19185	2735	MALE	Oligodendroglioma				G3			Supratentorial, Frontal Lobe	Central nervous system	R8 MD Anderson	Brain
TCGA-TM-A84G-01	TCGA-TM-A84G-01	10.12	54	-20014		FEMALE	Oligodendroglioma			TUMOR FREE	G3			Supratentorial, Frontal Lobe	Central nervous system	TM The University of New South Wales	Brain
TCGA-E1-5311-01	TCGA-E1-5311-01	10.17	31	-11332		MALE	Oligodendroglioma	0.6	1.1	WITH TUMOR	G3		0.2	Supratentorial, Temporal Lobe	Central nervous system	E1 Duke
TCGA-TM-A84M-01	TCGA-TM-A84M-01	10.17	40	-14660	455	MALE	Oligodendroglioma			TUMOR FREE	G3			Supratentorial, Frontal Lobe	Central nervous system	TM The University of New South Wales	Brain
TCGA-FG-7638-01	TCGA-FG-7638-01	10.21	31	-11528		FEMALE	Oligodendroglioma	1	1.3	WITH TUMOR	G3		0.6	Supratentorial, Frontal Lobe	Central nervous system	FG Case Western	Brain
TCGA-RY-A840-01	TCGA-RY-A840-01	10.21	47	-17501	444	MALE	Oligodendroglioma			WITH TUMOR	G3			Supratentorial, Temporal Lobe	Central nervous system	RY University of California San Francisco	Brain
TCGA-QH-A6X8-01	TCGA-QH-A6X8-01	10.21	56	-20771	54	FEMALE	Oligodendroglioma			WITH TUMOR	G3			Supratentorial, Frontal Lobe	Central nervous system	QH Fondazione-Besta	Brain
TCGA-DU-6397-01	TCGA-DU-6397-01	10.25	45	-16695		MALE	Oligodendroglioma	1	1.3	WITH TUMOR	G3		0.8	Supratentorial, Temporal Lobe	Central nervous system	DU Henry Ford Hospital	Brain
TCGA-VM-A8CB-01	TCGA-VM-A8CB-01	10.28	33	-12340		MALE	Oligodendroglioma			TUMOR FREE	G3			Supratentorial, Frontal Lobe	Central nervous system	VM Huntsman Cancer Institute	Brain
TCGA-E1-A7YS-01	TCGA-E1-A7YS-01	10.28	71	-26159	2123	MALE	Oligodendroglioma			WITH TUMOR	G3			Supratentorial, Temporal Lobe	Central nervous system	E1 Duke
TCGA-HT-7471-01	TCGA-HT-7471-01	10.29	37	-13564		FEMALE	Oligodendroglioma	0.9	1.5	TUMOR FREE	G3		0.4	Supratentorial, Temporal Lobe	Central nervous system	HT Case Western - St Joes
TCGA-CS-6670-01	TCGA-CS-6670-01	10.3	43	-16066		MALE	Oligodendroglioma			WITH TUMOR	G3			Supratentorial, Temporal Lobe	Central nervous system	CS Thomas Jefferson University	Brain
TCGA-HT-A74K-01	TCGA-HT-A74K-01	10.3	58	-21189	293	FEMALE	Oligodendroglioma			TUMOR FREE	G3			Supratentorial, Frontal Lobe	Central nervous system	HT Case Western - St Joes
TCGA-DU-6410-01	TCGA-DU-6410-01	10.31	56	-20567		MALE	Oligodendroglioma	0.8	0.8	WITH TUMOR	G3		0.6	Supratentorial, Frontal Lobe	Central nervous system	DU Henry Ford Hospital	Brain
TCGA-DB-A4XG-01	TCGA-DB-A4XG-01	10.32	34	-12550	2137	MALE	Oligodendroglioma			WITH TUMOR	G3			Supratentorial, Frontal Lobe	Central nervous system	DB Mayo Clinic - Rochester
TCGA-DU-6393-01	TCGA-DU-6393-01	10.33	66	-24282		MALE	Oligodendroglioma	0.7	0.7		G3		0.5	Supratentorial, Occipital Lobe	Central nervous system	DU Henry Ford Hospital	Brain
TCGA-HT-8105-01	TCGA-HT-8105-01	10.33	54	-20041		MALE	Oligodendroglioma	1	1.6	TUMOR FREE	G3		1	Supratentorial, Frontal Lobe	Central nervous system	HT Case Western - St Joes
TCGA-DU-7302-01	TCGA-DU-7302-01	10.34	48	-17656		FEMALE	Oligodendroglioma	0.9	1	WITH TUMOR	G3		0.7	Supratentorial, Frontal Lobe	Central nervous system	DU Henry Ford Hospital	Brain
TCGA-TM-A84J-01	TCGA-TM-A84J-01	10.35	63	-23091	415	MALE	Oligodendroglioma			WITH TUMOR	G3			Supratentorial, Occipital Lobe	Central nervous system	TM The University of New South Wales	Brain
TCGA-P5-A72Z-01	TCGA-P5-A72Z-01	10.35	64	-23482	178	FEMALE	Oligodendroglioma			TUMOR FREE	G3			Supratentorial, Temporal Lobe	Central nervous system	P5 Cureline	Brain
TCGA-VW-A7QS-01	TCGA-VW-A7QS-01	10.38	35	-12820		FEMALE	Oligodendroglioma			WITH TUMOR	G3			Supratentorial, Frontal Lobe	Central nervous system	VM Huntsman Cancer Institute	Brain
TCGA-TM-A84S-01	TCGA-TM-A84S-01	10.4	36	-13424		MALE	Oligodendroglioma			TUMOR FREE	G3			Supratentorial, Frontal Lobe	Central nervous system	TM The University of New South Wales	Brain
TCGA-DU-6394-01	TCGA-DU-6394-01	10.41	53	-19541		MALE	Oligodendroglioma			WITH TUMOR	G3			Supratentorial, Frontal Lobe	Central nervous system	DU Henry Ford Hospital	Brain
TCGA-CS-5396-01	TCGA-CS-5396-01	10.42	53	-19399		FEMALE	Oligodendroglioma	0.9	1.6	WITH TUMOR	G3		0.8	Supratentorial, Frontal Lobe	Central nervous system	CS Thomas Jefferson University	Brain
TCGA-DU-7018-01	TCGA-DU-7018-01	10.43	57	-21019		FEMALE	Oligodendroglioma	1	1	WITH TUMOR	G3		0.5	Supratentorial, Frontal Lobe	Central nervous system	DU Henry Ford Hospital	Brain
TCGA-HT-7687-01	TCGA-HT-7687-01	10.44	74	-27186		MALE	Oligodendroglioma			TUMOR FREE	G3			Supratentorial, Frontal Lobe	Central nervous system	HT Case Western - St Joes
TCGA-DU-6397-02	TCGA-DU-6397-02	10.45	45	-16695	5830	MALE	Oligodendroglioma			WITH TUMOR	G3			Supratentorial, Temporal Lobe	Central nervous system	DU Henry Ford Hospital	Brain
TCGA-HT-7688-01	TCGA-HT-7688-01	10.46	59	-21844		MALE	Oligodendroglioma	0.9	2.3	TUMOR FREE	G3		0.6	Supratentorial, Frontal Lobe	Central nervous system	HT Case Western - St Joes
TCGA-HT-7856-01	TCGA-HT-7856-01	10.48	35	-13145		MALE	Oligodendroglioma			TUMOR FREE	G3			Supratentorial, Frontal Lobe	Central nervous system	HT Case Western - St Joes
TCGA-DU-8168-01	TCGA-DU-8168-01	10.48	55	-20136		FEMALE	Oligodendroglioma			TUMOR FREE	G3			Supratentorial, Frontal Lobe	Central nervous system	DU Henry Ford Hospital	Brain
TCGA-HT-8109-01	TCGA-HT-8109-01	10.49	64	-23486		MALE	Oligodendroglioma	0.8	1.1	TUMOR FREE	G3		0.6	Supratentorial, Frontal Lobe	Central nervous system	HT Case Western - St Joes
TCGA-DH-5144-01	TCGA-DH-5144-01	10.49	56	-20558		FEMALE	Oligodendroglioma			TUMOR FREE	G3			Supratentorial, Frontal Lobe	Central nervous system	DH University of Florida	Brain

## Sheet: Oligodendroglioma_high
sample	samples	C20orf30	age_at_initial_pathologic_diagnosis	days_to_birth	days_to_collection	gender	histological_type	intermediate_dimension	longest_dimension	person_neoplasm_cancer_status	neoplasm_histologic_grade	new_neoplasm_event_type	shortest_dimension	tumor_location	tumor_tissue_site	tissue_source_site	_primary_site
TCGA-DU-7294-01	TCGA-DU-7294-01	10.5	53	-19616		FEMALE	Oligodendroglioma	1	1.1	TUMOR FREE	G2		0.9	Supratentorial, Frontal Lobe	Central nervous system	DU Henry Ford Hospital	Brain
TCGA-HT-7689-01	TCGA-HT-7689-01	10.5	58	-21331		FEMALE	Oligodendroglioma	1	1.2	TUMOR FREE	G2		0.7	Supratentorial, Frontal Lobe	Central nervous system	HT Case Western - St Joes	Brain
TCGA-E1-A7YY-01	TCGA-E1-A7YY-01	10.5	27	-9867	5621	FEMALE	Oligodendroglioma			WITH TUMOR	G2			Supratentorial, Frontal Lobe	Central nervous system	E1 Duke	Brain
TCGA-FG-8189-01	TCGA-FG-8189-01	10.5	33	-12384		FEMALE	Oligodendroglioma			WITH TUMOR	G2			Supratentorial, Temporal Lobe	Central nervous system	FG Case Western	Brain
TCGA-P5-A5F0-01	TCGA-P5-A5F0-01	10.5	33	-12157	62	MALE	Oligodendroglioma			TUMOR FREE	G2			Supratentorial, Frontal Lobe	Central nervous system	P5 Cureline	Brain
TCGA-QH-A6X9-01	TCGA-QH-A6X9-01	10.51	73	-26992	22	FEMALE	Oligodendroglioma				G2			Supratentorial, Temporal Lobe	Central nervous system	QH Fondazione-Besta	Brain
TCGA-FG-A70Y-01	TCGA-FG-A70Y-01	10.53	20	-7421	804	FEMALE	Oligodendroglioma			WITH TUMOR	G2			Supratentorial, Temporal Lobe	Central nervous system	FG Case Western	Brain
TCGA-HT-7472-01	TCGA-HT-7472-01	10.53	38	-13968		MALE	Oligodendroglioma			TUMOR FREE	G2			Supratentorial, Frontal Lobe	Central nervous system	HT Case Western - St Joes
TCGA-FG-A4MT-01	TCGA-FG-A4MT-01	10.54	27	-10082		FEMALE	Oligodendroglioma			TUMOR FREE	G2			Supratentorial, Temporal Lobe	Central nervous system	FG Case Western	Brain
TCGA-HW-8322-01	TCGA-HW-8322-01	10.55	39	-14548		MALE	Oligodendroglioma	0.9	1.5	WITH TUMOR	G2		0.5	Supratentorial, Frontal Lobe	Central nervous system	HW MSKCC	Brain
TCGA-DU-A7TG-01	TCGA-DU-A7TG-01	10.58	40	-14671	1804	MALE	Oligodendroglioma				G2			Supratentorial, Frontal Lobe	Central nervous system	DU Henry Ford Hospital	Brain
TCGA-CS-6669-01	TCGA-CS-6669-01	10.59	26	-9809		FEMALE	Oligodendroglioma			WITH TUMOR	G2			Supratentorial, Temporal Lobe	Central nervous system	CS Thomas Jefferson University	Brain
TCGA-HT-A615-01	TCGA-HT-A615-01	10.59	38	-13892	300	FEMALE	Oligodendroglioma			TUMOR FREE	G2			Supratentorial, Temporal Lobe	Central nervous system	HT Case Western - St Joes
TCGA-HT-8113-01	TCGA-HT-8113-01	10.59	49	-18173		FEMALE	Oligodendroglioma			TUMOR FREE	G2			Supratentorial, Frontal Lobe	Central nervous system	HT Case Western - St Joes
TCGA-TM-A84R-01	TCGA-TM-A84R-01	10.6	46	-16843	346	MALE	Oligodendroglioma			TUMOR FREE	G2			Supratentorial, Frontal Lobe	Central nervous system	TM The University of New South Wales	Brain
TCGA-DU-6399-01	TCGA-DU-6399-01	10.6	54	-19906		MALE	Oligodendroglioma			WITH TUMOR	G2			Supratentorial, Temporal Lobe	Central nervous system	DU Henry Ford Hospital	Brain
TCGA-FG-A711-01	TCGA-FG-A711-01	10.61	33	-12248	1265	FEMALE	Oligodendroglioma			WITH TUMOR	G2			Supratentorial, Frontal Lobe	Central nervous system	FG Case Western	Brain
TCGA-HT-A61A-01	TCGA-HT-A61A-01	10.63	20	-7664		FEMALE	Oligodendroglioma			TUMOR FREE	G2			Supratentorial, Temporal Lobe	Central nervous system	HT Case Western - St Joes
TCGA-HT-A5R5-01	TCGA-HT-A5R5-01	10.63	33	-12403	194	FEMALE	Oligodendroglioma			TUMOR FREE	G2			Supratentorial, Temporal Lobe	Central nervous system	HT Case Western - St Joes
TCGA-FG-5964-01	TCGA-FG-5964-01	10.64	62	-22735		MALE	Oligodendroglioma	0.7	0.7	WITH TUMOR	G2		0.6	Supratentorial, Parietal Lobe	Central nervous system	FG Case Western	Brain
TCGA-FG-6690-01	TCGA-FG-6690-01	10.66	70	-25667		MALE	Oligodendroglioma			WITH TUMOR	G2			Supratentorial, Frontal Lobe	Central nervous system	FG Case Western	Brain
TCGA-DU-6407-01	TCGA-DU-6407-01	10.67	35	-13021		FEMALE	Oligodendroglioma	0.8	0.8	WITH TUMOR	G2		0.5	[Discrepancy]	Central nervous system	DU Henry Ford Hospital	Brain
TCGA-E1-5319-01	TCGA-E1-5319-01	10.67	48	-17612		FEMALE	Oligodendroglioma	0.8	1	WITH TUMOR	G2		0.5	Supratentorial, Frontal Lobe	Central nervous system	E1 Duke
TCGA-DU-A5TS-01	TCGA-DU-A5TS-01	10.69	42	-15650	259	MALE	Oligodendroglioma			TUMOR FREE	G2			Supratentorial, Frontal Lobe	Central nervous system	DU Henry Ford Hospital	Brain
TCGA-FG-7634-01	TCGA-FG-7634-01	10.7	28	-10476		MALE	Oligodendroglioma			WITH TUMOR	G2			Supratentorial, Frontal Lobe	Central nervous system	FG Case Western	Brain
TCGA-DU-7301-01	TCGA-DU-7301-01	10.71	53	-19644		MALE	Oligodendroglioma	1	1	WITH TUMOR	G2		0.5	Supratentorial, Temporal Lobe	Central nervous system	DU Henry Ford Hospital	Brain
TCGA-HT-7881-01	TCGA-HT-7881-01	10.71	38	-14171		MALE	Oligodendroglioma			TUMOR FREE	G2			Supratentorial, Temporal Lobe	Central nervous system	HT Case Western - St Joes
TCGA-R8-A6MO-01	TCGA-R8-A6MO-01	10.71	53	-19432		FEMALE	Oligodendroglioma				G2			Supratentorial, Frontal Lobe	Central nervous system	R8 MD Anderson	Brain
TCGA-HT-7676-01	TCGA-HT-7676-01	10.73	26	-9667		MALE	Oligodendroglioma			TUMOR FREE	G2			Supratentorial, Frontal Lobe	Central nervous system	HT Case Western - St Joes
TCGA-DU-7008-01	TCGA-DU-7008-01	10.73	41	-15289		FEMALE	Oligodendroglioma			TUMOR FREE	G2			Supratentorial, Frontal Lobe	Central nervous system	DU Henry Ford Hospital	Brain
TCGA-VM-A8C8-01	TCGA-VM-A8C8-01	10.73	50	-18494	959	FEMALE	Oligodendroglioma				G2			Supratentorial, Temporal Lobe	Central nervous system	VM Huntsman Cancer Institute	Brain
TCGA-DU-7015-01	TCGA-DU-7015-01	10.74	41	-15041		FEMALE	Oligodendroglioma			WITH TUMOR	G2			Supratentorial, Temporal Lobe	Central nervous system	DU Henry Ford Hospital	Brain
TCGA-TQ-A8XE-02	TCGA-TQ-A8XE-02	10.74	42	-15629	1308	FEMALE	Oligodendroglioma			WITH TUMOR	G2			Supratentorial, Temporal Lobe	Central nervous system	TQ University of Sao Paulo	Brain
TCGA-DU-7014-01	TCGA-DU-7014-01	10.74	59	-21865		MALE	Oligodendroglioma			WITH TUMOR	G2			Supratentorial, Frontal Lobe	Central nervous system	DU Henry Ford Hospital	Brain
TCGA-DB-A64L-01	TCGA-DB-A64L-01	10.75	67	-24690		FEMALE	Oligodendroglioma			WITH TUMOR	G2			Supratentorial, Frontal Lobe	Central nervous system	DB Mayo Clinic - Rochester	Brain
TCGA-HT-7481-01	TCGA-HT-7481-01	10.76	39	-14306		MALE	Oligodendroglioma	1	2	WITH TUMOR	G2		0.9	Supratentorial, Frontal Lobe	Central nervous system	HT Case Western - St Joes
TCGA-RY-A847-01	TCGA-RY-A847-01	10.77	45	-16732	471	MALE	Oligodendroglioma			TUMOR FREE	G2			Supratentorial, Frontal Lobe	Central nervous system	RY University of California San Francisco	Brain
TCGA-HT-7467-01	TCGA-HT-7467-01	10.78	54	-19944		MALE	Oligodendroglioma			TUMOR FREE	G2			Supratentorial, Parietal Lobe	Central nervous system	HT Case Western - St Joes
TCGA-DU-A7TA-01	TCGA-DU-A7TA-01	10.8	32	-11764		MALE	Oligodendroglioma			TUMOR FREE	G2			Supratentorial, Occipital Lobe	Central nervous system	DU Henry Ford Hospital	Brain
TCGA-HW-7486-01	TCGA-HW-7486-01	10.81	37	-13546		MALE	Oligodendroglioma	0.9	1	TUMOR FREE	G2		0.8	Supratentorial, Frontal Lobe	Central nervous system	HW MSKCC	Brain
TCGA-HT-7602-01	TCGA-HT-7602-01	10.82	21	-7946		MALE	Oligodendroglioma	1	2.8	TUMOR FREE	G2		1	Supratentorial, Frontal Lobe	Central nervous system	HT Case Western - St Joes
TCGA-HT-8558-01	TCGA-HT-8558-01	10.82	29	-10950		FEMALE	Oligodendroglioma			TUMOR FREE	G2			Supratentorial, Temporal Lobe	Central nervous system	HT Case Western - St Joes
TCGA-QH-A65V-01	TCGA-QH-A65V-01	10.83	43	-15850		FEMALE	Oligodendroglioma			WITH TUMOR	G2			Supratentorial, Temporal Lobe	Central nervous system	QH Fondazione-Besta	Brain
TCGA-FG-A4MT-02	TCGA-FG-A4MT-02	10.84	27	-10082	827	FEMALE	Oligodendroglioma			TUMOR FREE	G2			Supratentorial, Temporal Lobe	Central nervous system	FG Case Western	Brain
TCGA-IK-7675-01	TCGA-IK-7675-01	10.87	43	-15900		MALE	Oligodendroglioma	0.8	1	WITH TUMOR	G2		0.4	Supratentorial, Frontal Lobe	Central nervous system	IK Christiana Healthcare	Brain
TCGA-VM-A8CA-01	TCGA-VM-A8CA-01	10.93	54	-19991	798	MALE	Oligodendroglioma			WITH TUMOR	G2			Supratentorial, Frontal Lobe	Central nervous system	VM Huntsman Cancer Institute	Brain
TCGA-DB-5279-01	TCGA-DB-5279-01	10.94	59	-21908		MALE	Oligodendroglioma	1	1.3	TUMOR FREE	G2		0.4	Supratentorial, Frontal Lobe	Central nervous system	DB Mayo Clinic - Rochester	Brain
TCGA-EZ-7264-01	TCGA-EZ-7264-01	10.98	47	-17432		FEMALE	Oligodendroglioma			WITH TUMOR	G2			Supratentorial, Frontal Lobe	Central nervous system	EZ UNC	Brain
TCGA-HT-7603-01	TCGA-HT-7603-01	11	29	-10883		MALE	Oligodendroglioma			TUMOR FREE	G2			Supratentorial, Frontal Lobe	Central nervous system	HT Case Western - St Joes
TCGA-DU-6407-02	TCGA-DU-6407-02	11.01	35	-13021	4524	FEMALE	Oligodendroglioma			WITH TUMOR	G2			[Discrepancy]	Central nervous system	DU Henry Ford Hospital	Brain
TCGA-DB-A64V-01	TCGA-DB-A64V-01	11.16	54	-19950	352	MALE	Oligodendroglioma			TUMOR FREE	G2			Supratentorial, Frontal Lobe	Central nervous system	DB Mayo Clinic - Rochester	Brain
TCGA-DU-A7TB-01	TCGA-DU-A7TB-01	11.2	56	-20704	1168	MALE	Oligodendroglioma			TUMOR FREE	G2			Supratentorial, Temporal Lobe	Central nervous system	DU Henry Ford Hospital	Brain
TCGA-E1-A7Z2-01	TCGA-E1-A7Z2-01	11.21	58	-21341	614	FEMALE	Oligodendroglioma			WITH TUMOR	G2			Supratentorial, Frontal Lobe	Central nervous system	E1 Duke
TCGA-DU-A76K-01	TCGA-DU-A76K-01	11.31	87	-31776		MALE	Oligodendroglioma			WITH TUMOR	G2			Supratentorial, Parietal Lobe	Central nervous system	DU Henry Ford Hospital	Brain
TCGA-CS-5395-01	TCGA-CS-5395-01	11.61	43	-15848		MALE	Oligodendroglioma	1	1.5	WITH TUMOR	G2		0.1	Supratentorial, Parietal Lobe	Central nervous system	CS Thomas Jefferson University	Brain
TCGA-HT-A617-01	TCGA-HT-A617-01	11.68	47	-17331		MALE	Oligodendroglioma				G2			Supratentorial, Not Otherwise Specified	Central nervous system	HT Case Western - St Joes
TCGA-P5-A5F6-01	TCGA-P5-A5F6-01	12.09	26	-9575		MALE	Oligodendroglioma			TUMOR FREE	G2			Supratentorial, Frontal Lobe	Central nervous system	P5 Cureline	Brain
TCGA-DH-5141-01	TCGA-DH-5141-01	10.5	32	-11846		MALE	Oligodendroglioma	0.3	0.6		G3		0.2	Supratentorial, Frontal Lobe	Central nervous system	DH University of Florida	Brain
TCGA-DU-7309-01	TCGA-DU-7309-01	10.51	41	-15197		FEMALE	Oligodendroglioma			WITH TUMOR	G3			Supratentorial, Frontal Lobe	Central nervous system	DU Henry Ford Hospital	Brain
TCGA-DU-6404-01	TCGA-DU-6404-01	10.53	24	-9021		FEMALE	Oligodendroglioma	0.6	1	WITH TUMOR	G3		0.3	Supratentorial, Frontal Lobe	Central nervous system	DU Henry Ford Hospital	Brain
TCGA-HT-7874-01	TCGA-HT-7874-01	10.54	41	-15045		FEMALE	Oligodendroglioma	1	2	TUMOR FREE	G3		0.6	Supratentorial, Frontal Lobe	Central nervous system	HT Case Western - St Joes
TCGA-QH-A65R-01	TCGA-QH-A65R-01	10.55	38	-14073		FEMALE	Oligodendroglioma			WITH TUMOR	G3			Supratentorial, Frontal Lobe	Central nervous system	QH Fondazione-Besta	Brain
TCGA-FG-5962-01	TCGA-FG-5962-01	10.56	54	-19818		MALE	Oligodendroglioma	1	1	WITH TUMOR	G3		0.5	Supratentorial, Occipital Lobe	Central nervous system	FG Case Western	Brain
TCGA-TQ-A7RF-01	TCGA-TQ-A7RF-01	10.63	27	-9919		FEMALE	Oligodendroglioma			WITH TUMOR	G3			Supratentorial, Temporal Lobe	Central nervous system	TQ University of Sao Paulo	Brain
TCGA-HT-7470-01	TCGA-HT-7470-01	10.65	37	-13611		MALE	Oligodendroglioma	1	1.3	TUMOR FREE	G3		0.8	Supratentorial, Temporal Lobe	Central nervous system	HT Case Western - St Joes
TCGA-P5-A5F4-01	TCGA-P5-A5F4-01	10.67	35	-12851	37	FEMALE	Oligodendroglioma			TUMOR FREE	G3			Supratentorial, Temporal Lobe	Central nervous system	P5 Cureline	Brain
TCGA-S9-A6TW-01	TCGA-S9-A6TW-01	10.67	40	-14679		MALE	Oligodendroglioma			TUMOR FREE	G3			Supratentorial, Frontal Lobe	Central nervous system	S9 Dept of Neurosurgery at University of Heidelberg	Brain
TCGA-HT-7616-01	TCGA-HT-7616-01	10.68	75	-27685		MALE	Oligodendroglioma	0.9	1.3	WITH TUMOR	G3		0.3	Supratentorial, Frontal Lobe	Central nervous system	HT Case Western - St Joes
TCGA-DU-6408-01	TCGA-DU-6408-01	10.68	23	-8752		FEMALE	Oligodendroglioma	1	1		G3		0.5	Supratentorial, Frontal Lobe	Central nervous system	DU Henry Ford Hospital	Brain
TCGA-DB-A64P-01	TCGA-DB-A64P-01	10.68	40	-14936	443	MALE	Oligodendroglioma			TUMOR FREE	G3			Supratentorial, Frontal Lobe	Central nervous system	DB Mayo Clinic - Rochester	Brain
TCGA-HT-A5R9-01	TCGA-HT-A5R9-01	10.68	48	-17775	79	FEMALE	Oligodendroglioma				G3			Supratentorial, Frontal Lobe	Central nervous system	HT Case Western - St Joes
TCGA-HT-A4DV-01	TCGA-HT-A4DV-01	10.69	51	-18799	141	FEMALE	Oligodendroglioma			TUMOR FREE	G3			Supratentorial, Frontal Lobe	Central nervous system	HT Case Western - St Joes
TCGA-DH-A7UR-01	TCGA-DH-A7UR-01	10.69	59	-21803		FEMALE	Oligodendroglioma			TUMOR FREE	G3			Supratentorial, Frontal Lobe	Central nervous system	DH University of Florida	Brain
TCGA-DH-A66G-01	TCGA-DH-A66G-01	10.7	49	-18199		FEMALE	Oligodendroglioma			WITH TUMOR	G3			Supratentorial, Frontal Lobe	Central nervous system	DH University of Florida	Brain
TCGA-S9-A6WD-01	TCGA-S9-A6WD-01	10.72	58	-21231	1922	MALE	Oligodendroglioma			WITH TUMOR	G3			Supratentorial, Parietal Lobe	Central nervous system	S9 Dept of Neurosurgery at University of Heidelberg	Brain
TCGA-S9-A7J0-01	TCGA-S9-A7J0-01	10.73	30	-10989		FEMALE	Oligodendroglioma			WITH TUMOR	G3			Supratentorial, Frontal Lobe	Central nervous system	S9 Dept of Neurosurgery at University of Heidelberg	Brain
TCGA-DU-7300-01	TCGA-DU-7300-01	10.74	53	-19610		FEMALE	Oligodendroglioma	1	1	WITH TUMOR	G3		0.4	Supratentorial, Frontal Lobe	Central nervous system	DU Henry Ford Hospital	Brain
TCGA-HT-8019-01	TCGA-HT-8019-01	10.76	34	-12669		FEMALE	Oligodendroglioma			TUMOR FREE	G3			Supratentorial, Frontal Lobe	Central nervous system	HT Case Western - St Joes
TCGA-HT-7694-01	TCGA-HT-7694-01	10.78	60	-21930		MALE	Oligodendroglioma	0.9	2.5	TUMOR FREE	G3		0.5	Supratentorial, Frontal Lobe	Central nervous system	HT Case Western - St Joes
TCGA-DU-A7T6-01	TCGA-DU-A7T6-01	10.82	73	-26766	4265	FEMALE	Oligodendroglioma			WITH TUMOR	G3			Supratentorial, Frontal Lobe	Central nervous system	DU Henry Ford Hospital	Brain
TCGA-TM-A84O-01	TCGA-TM-A84O-01	10.83	61	-22327	920	FEMALE	Oligodendroglioma			WITH TUMOR	G3			Supratentorial, Not Otherwise Specified	Central nervous system	TM The University of New South Wales	Brain
TCGA-DU-A6S8-01	TCGA-DU-A6S8-01	10.86	74	-27084		FEMALE	Oligodendroglioma			WITH TUMOR	G3			Supratentorial, Frontal Lobe	Central nervous system	DU Henry Ford Hospital	Brain
TCGA-HT-A619-01	TCGA-HT-A619-01	10.89	51	-18857	84	FEMALE	Oligodendroglioma			TUMOR FREE	G3			Supratentorial, Frontal Lobe	Central nervous system	HT Case Western - St Joes
TCGA-FG-8191-01	TCGA-FG-8191-01	10.93	30	-11252		MALE	Oligodendroglioma	0.7	1.3	WITH TUMOR	G3		0.7	Supratentorial, Frontal Lobe	Central nervous system	FG Case Western	Brain
TCGA-DU-A76R-01	TCGA-DU-A76R-01	10.93	51	-18939	2739	MALE	Oligodendroglioma			WITH TUMOR	G3			Supratentorial, Frontal Lobe	Central nervous system	DU Henry Ford Hospital	Brain
TCGA-HT-A61C-01	TCGA-HT-A61C-01	10.94	66	-24276	56	MALE	Oligodendroglioma			WITH TUMOR	G3			Supratentorial, Temporal Lobe	Central nervous system	HT Case Western - St Joes
TCGA-HT-7620-01	TCGA-HT-7620-01	10.97	40	-14659		MALE	Oligodendroglioma	1.1	3.7	TUMOR FREE	G3		0.6	Supratentorial, Frontal Lobe	Central nervous system	HT Case Western - St Joes
TCGA-DH-A669-02	TCGA-DH-A669-02	11.01	70	-25809	2274	MALE	Oligodendroglioma			TUMOR FREE	G3			Supratentorial, Parietal Lobe	Central nervous system	DH University of Florida	Brain
TCGA-HW-A5KJ-01	TCGA-HW-A5KJ-01	11.05	68	-24966		MALE	Oligodendroglioma			WITH TUMOR	G3			Supratentorial, Frontal Lobe	Central nervous system	HW MSKCC	Brain
TCGA-P5-A72U-01	TCGA-P5-A72U-01	11.06	71	-26002	196	FEMALE	Oligodendroglioma			TUMOR FREE	G3			Supratentorial, Parietal Lobe	Central nervous system	P5 Cureline	Brain
TCGA-DU-6404-02	TCGA-DU-6404-02	11.13	24	-9021	4892	FEMALE	Oligodendroglioma			WITH TUMOR	G3			Supratentorial, Frontal Lobe	Central nervous system	DU Henry Ford Hospital	Brain
TCGA-HT-7469-01	TCGA-HT-7469-01	11.15	30	-11097		MALE	Oligodendroglioma	1	1.5	WITH TUMOR	G3		1	Supratentorial, Temporal Lobe	Central nervous system	HT Case Western - St Joes
TCGA-QH-A6CU-01	TCGA-QH-A6CU-01	11.22	52	-19149	59	FEMALE	Oligodendroglioma			TUMOR FREE	G3			Supratentorial, Frontal Lobe	Central nervous system	QH Fondazione-Besta	Brain
TCGA-DU-A76L-01	TCGA-DU-A76L-01	11.29	54	-19823	4769	MALE	Oligodendroglioma			WITH TUMOR	G3			Supratentorial, Temporal Lobe	Central nervous system	DU Henry Ford Hospital	Brain
TCGA-P5-A5EX-01	TCGA-P5-A5EX-01	11.32	41	-15091	65	FEMALE	Oligodendroglioma			TUMOR FREE	G3			Supratentorial, Frontal Lobe	Central nervous system	P5 Cureline	Brain
TCGA-HT-7882-01	TCGA-HT-7882-01	11.32	66	-24450		MALE	Oligodendroglioma			WITH TUMOR	G3			Supratentorial, Frontal Lobe	Central nervous system	HT Case Western - St Joes
TCGA-FG-6692-01	TCGA-FG-6692-01	11.49	63	-23374		MALE	Oligodendroglioma			WITH TUMOR	G3			Supratentorial, Frontal Lobe	Central nervous system	FG Case Western	Brain
TCGA-E1-A7YQ-01	TCGA-E1-A7YQ-01	11.58	58	-21341	4796	FEMALE	Oligodendroglioma			WITH TUMOR	G3			Supratentorial, Temporal Lobe	Central nervous system	E1 Duke
TCGA-DU-8165-01	TCGA-DU-8165-01	11.76	60	-21964		FEMALE	Oligodendroglioma			TUMOR FREE	G3			Supratentorial, Temporal Lobe	Central nervous system	DU Henry Ford Hospital	Brain
TCGA-DH-A669-01	TCGA-DH-A669-01	11.79	70	-25809		MALE	Oligodendroglioma			TUMOR FREE	G3			Supratentorial, Parietal Lobe	Central nervous system	DH University of Florida	Brain
TCGA-DU-A5TT-01	TCGA-DU-A5TT-01	11.82	70	-25726	24	MALE	Oligodendroglioma			WITH TUMOR	G3			Supratentorial, Frontal Lobe	Central nervous system	DU Henry Ford Hospital	Brain
